# Supplementary material
Source: PubMed Central journal article supplement (PMC2661628)

chr1:12,678,308-12,679,940 Score=11.6405

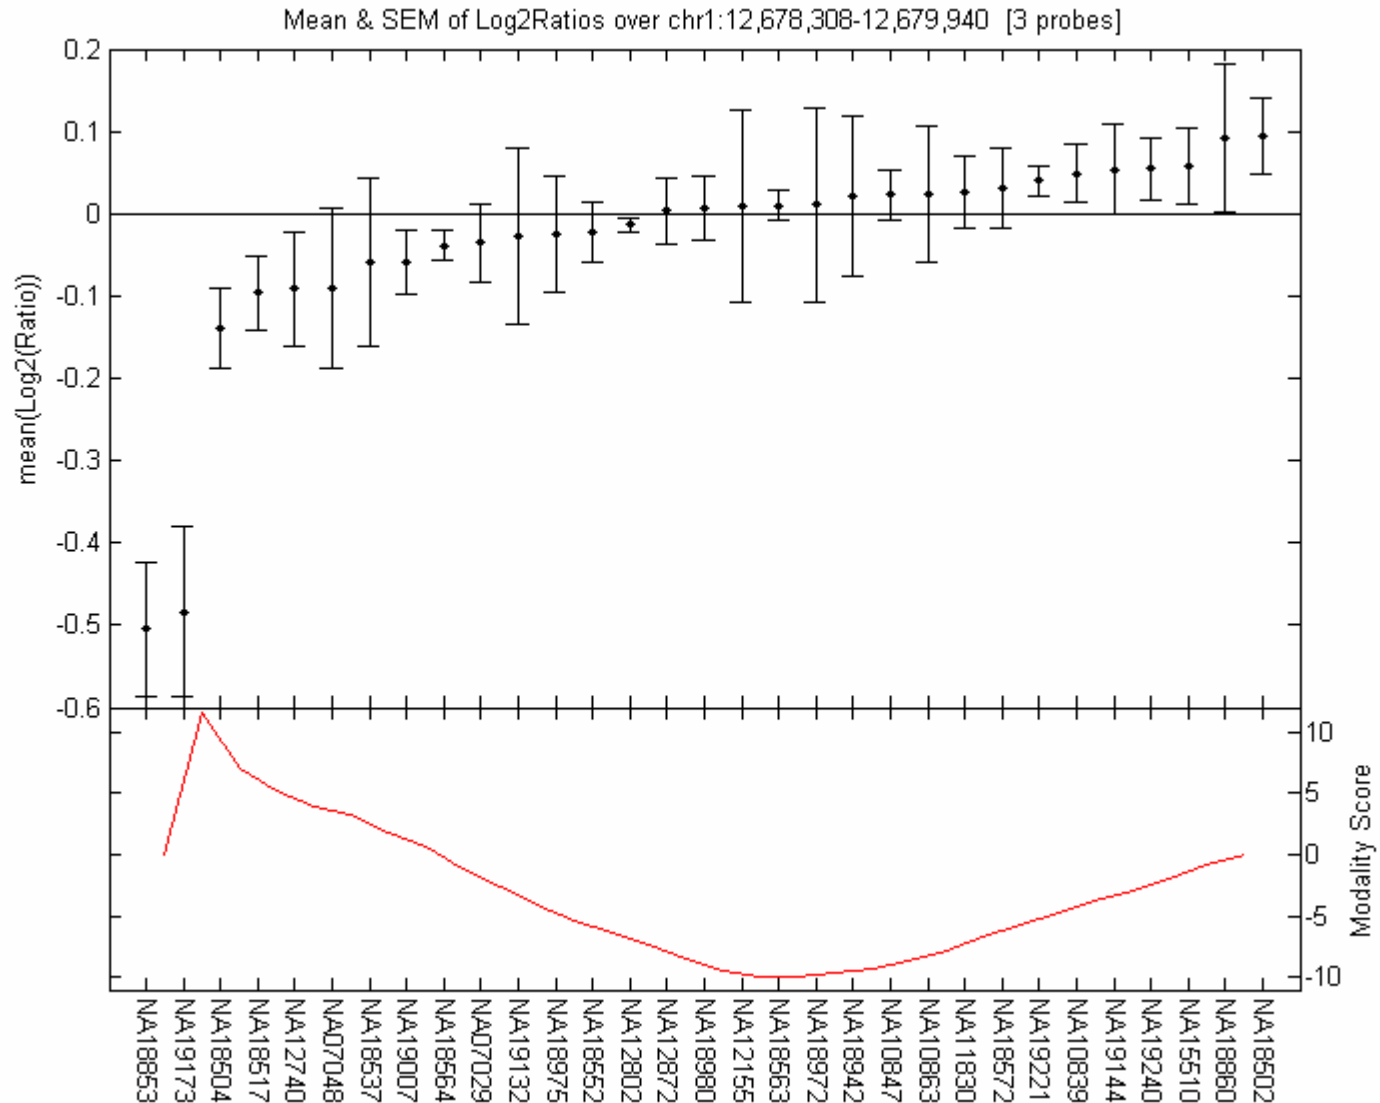

chr1:30,408,386-30,409,034 Score=12.1046

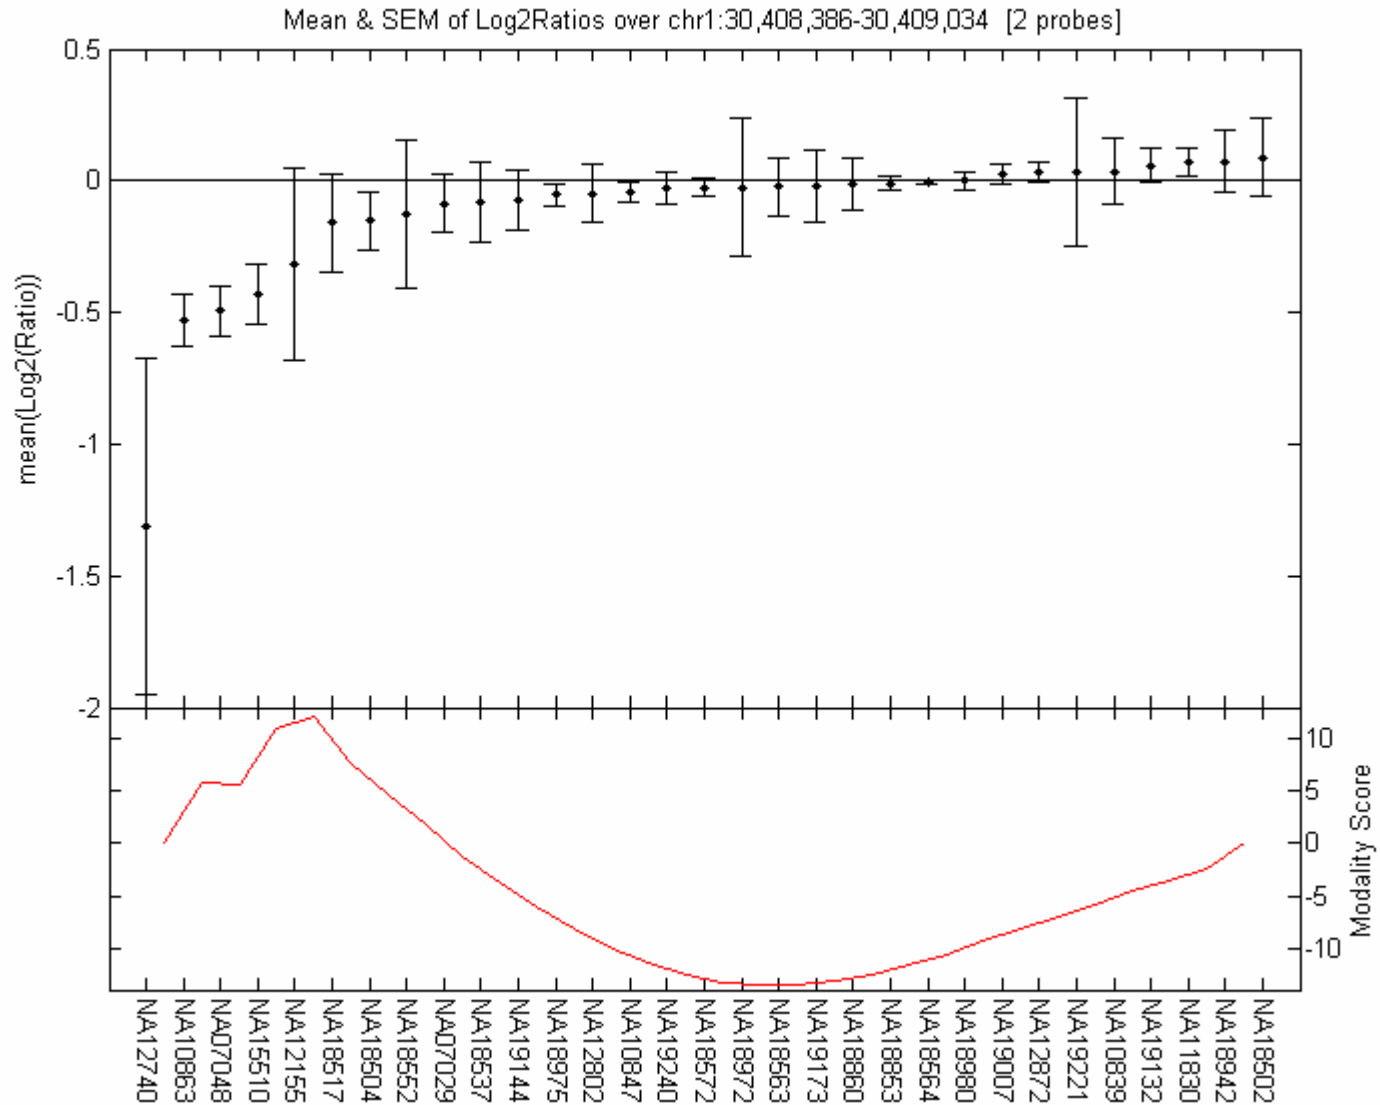

chr1:34,773,595-34,780,581 Score=15.7258

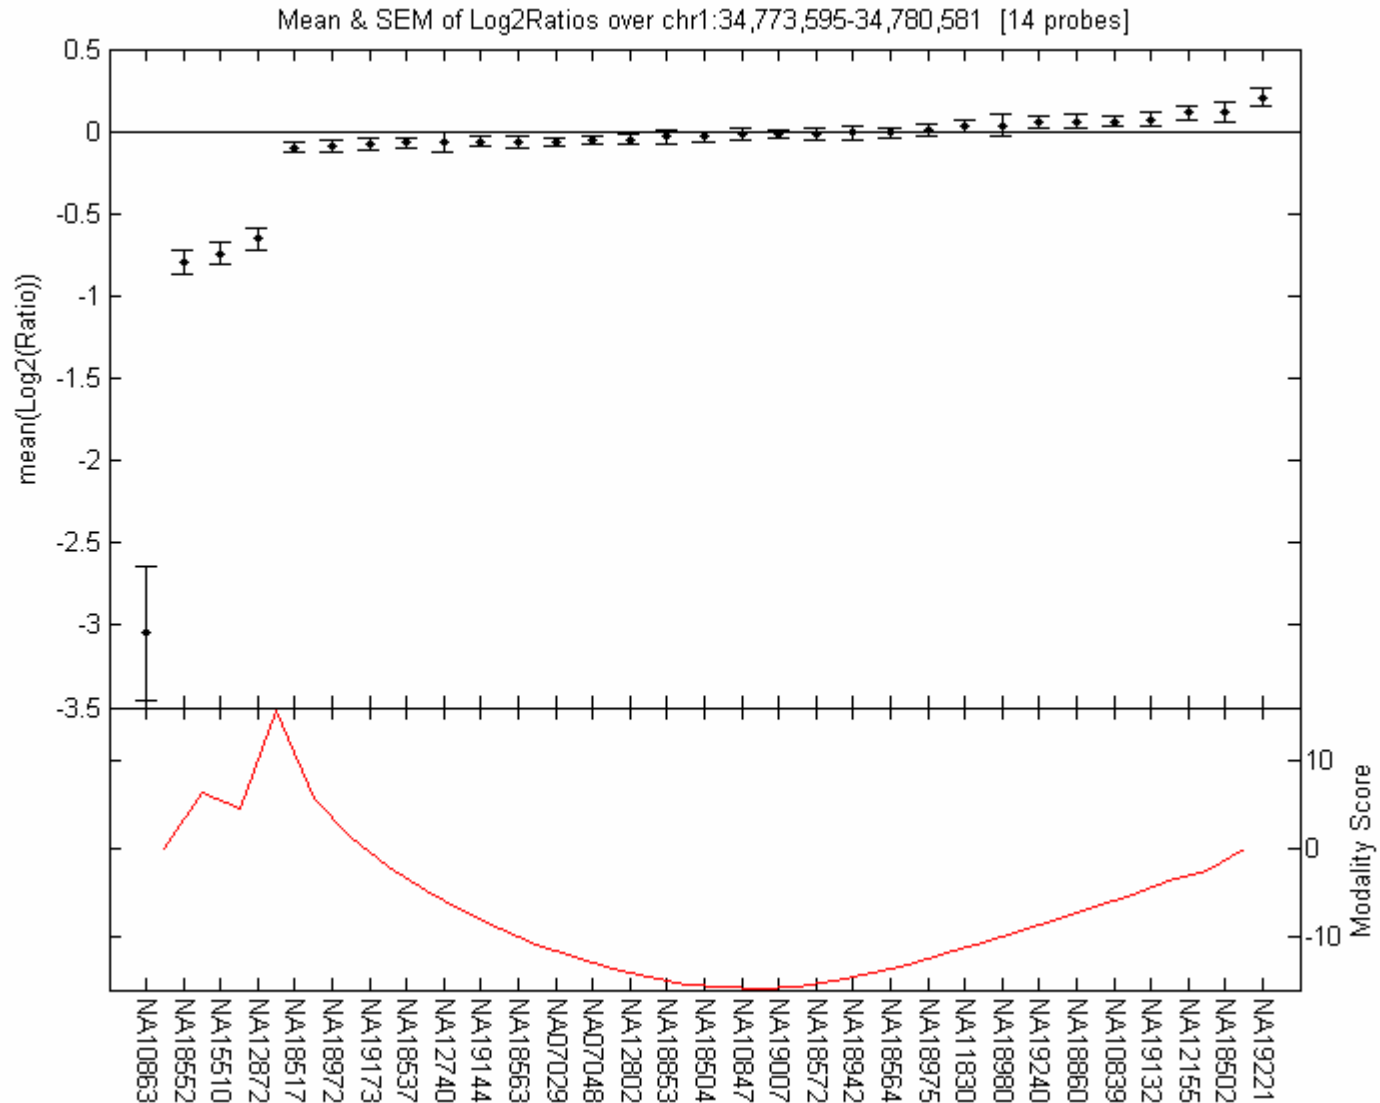

chr1:55,013,699-55,015,642 Score=15.5242

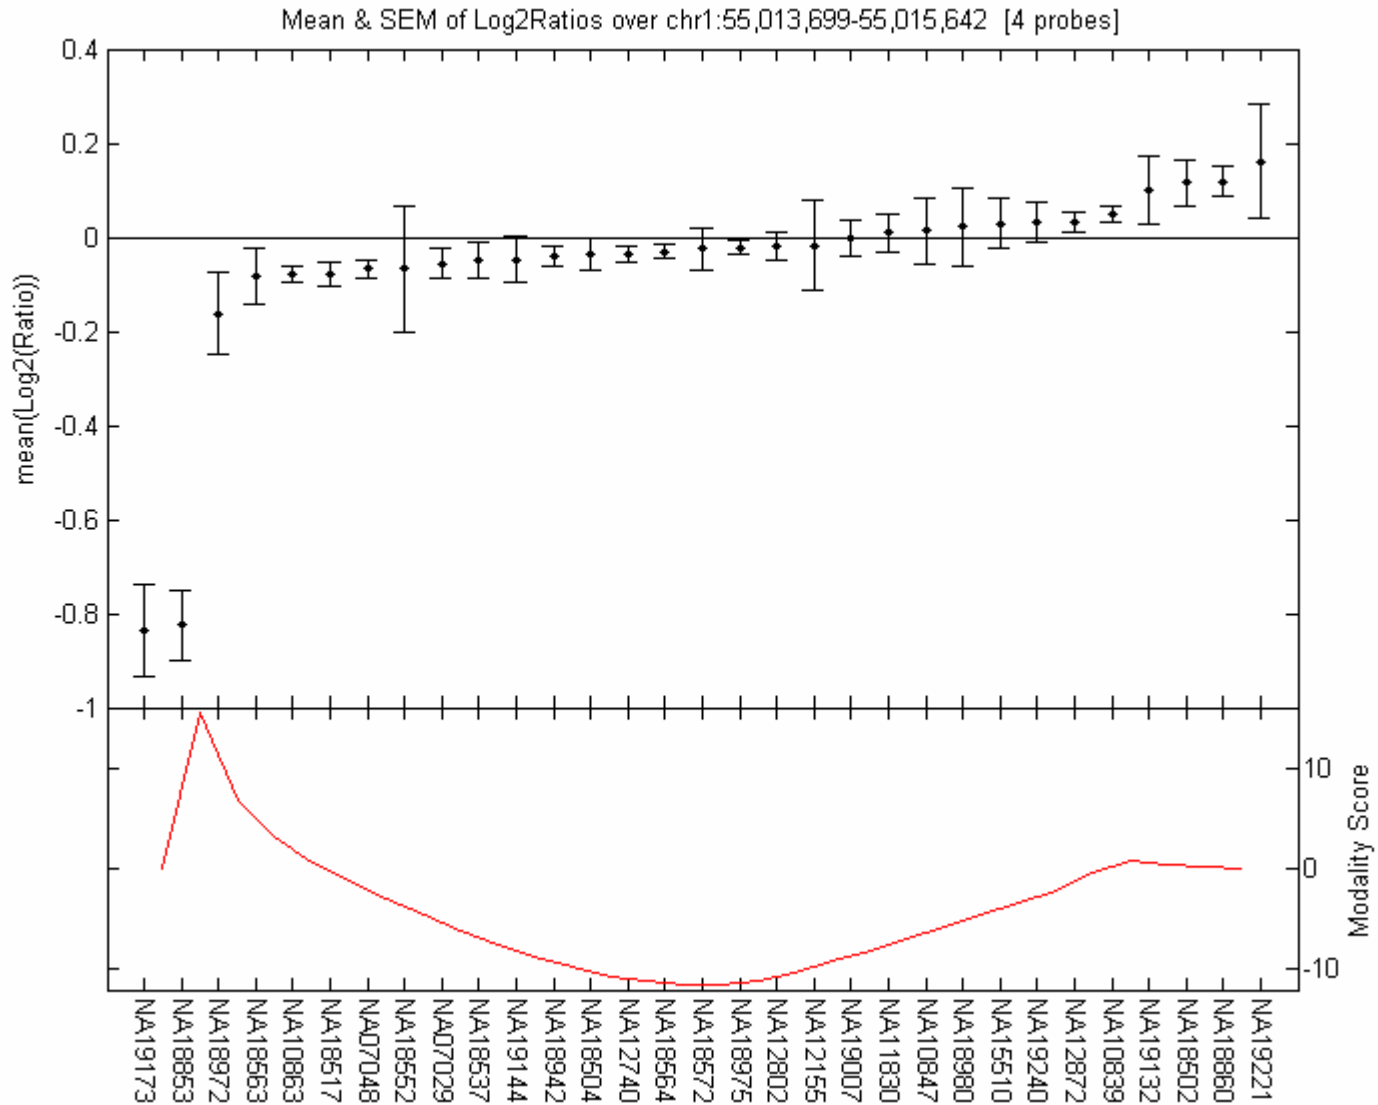

chr1:72,468,129-72,475,692 Score=18.2821

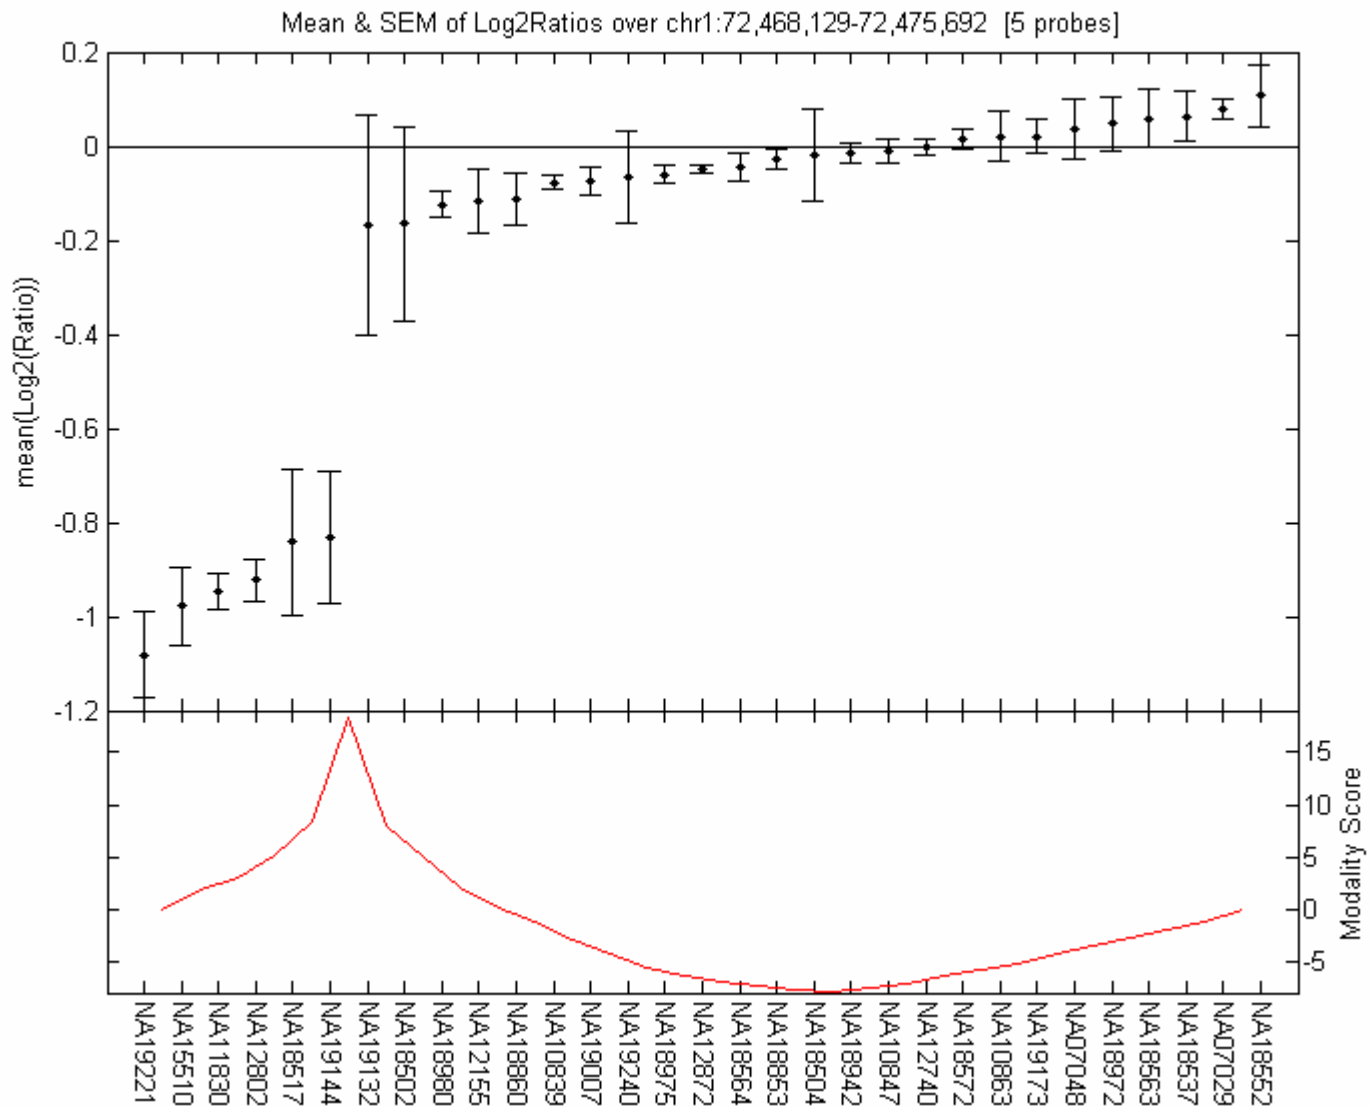

chr1:72,478,604-72,523,661 Score=11.4139

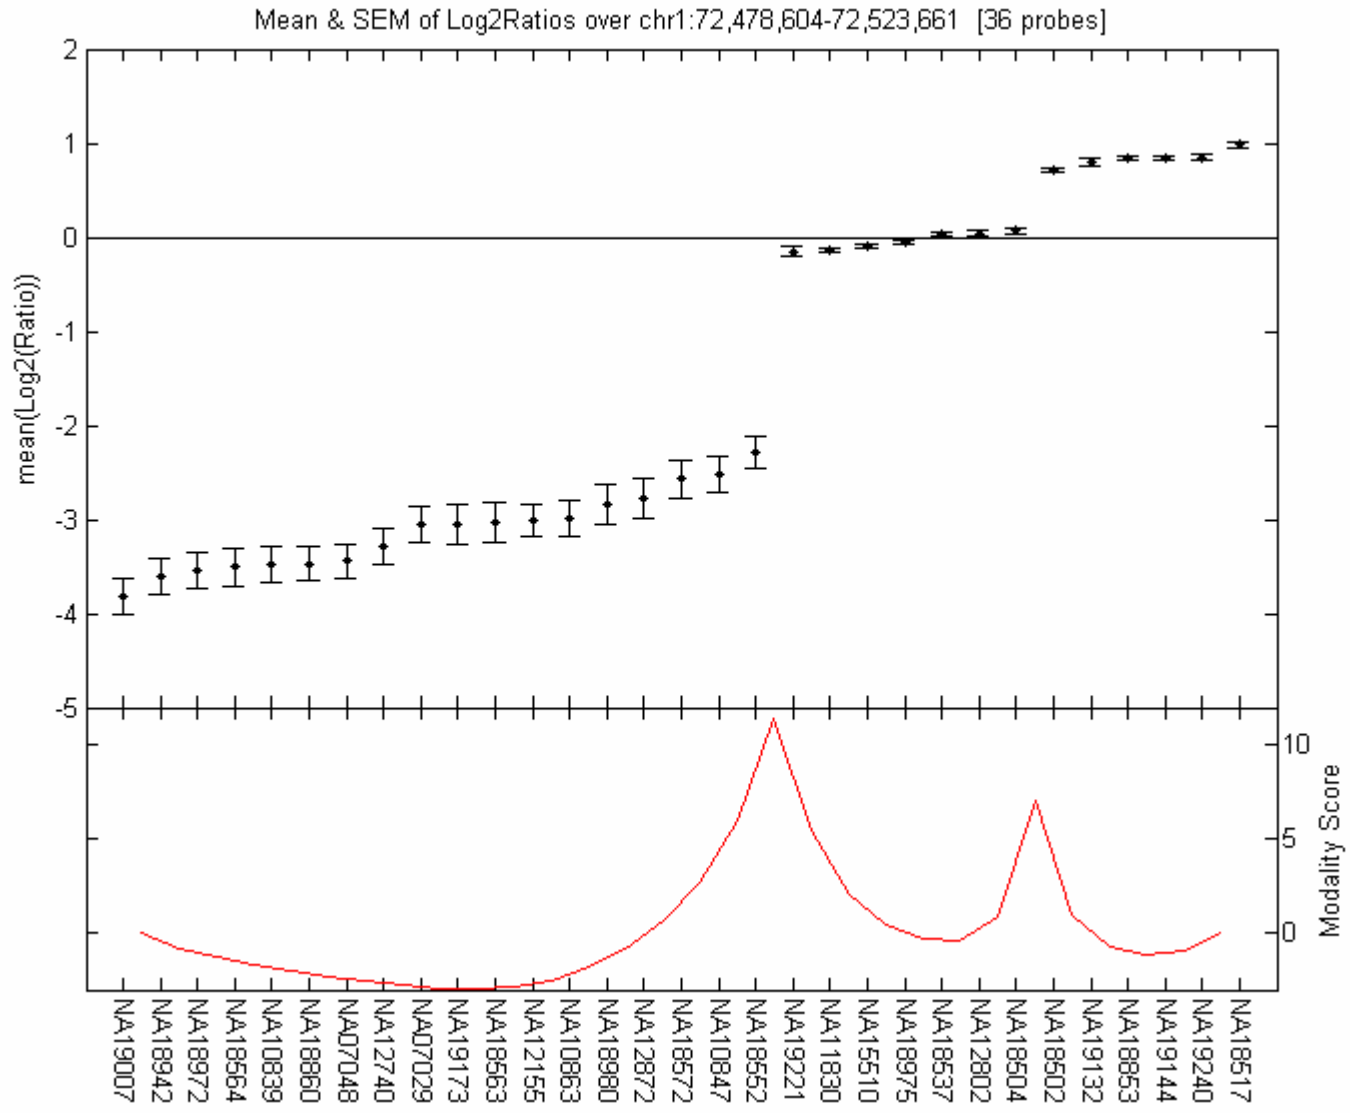

chr1:86,113,069-86,116,349 Score=28.2391

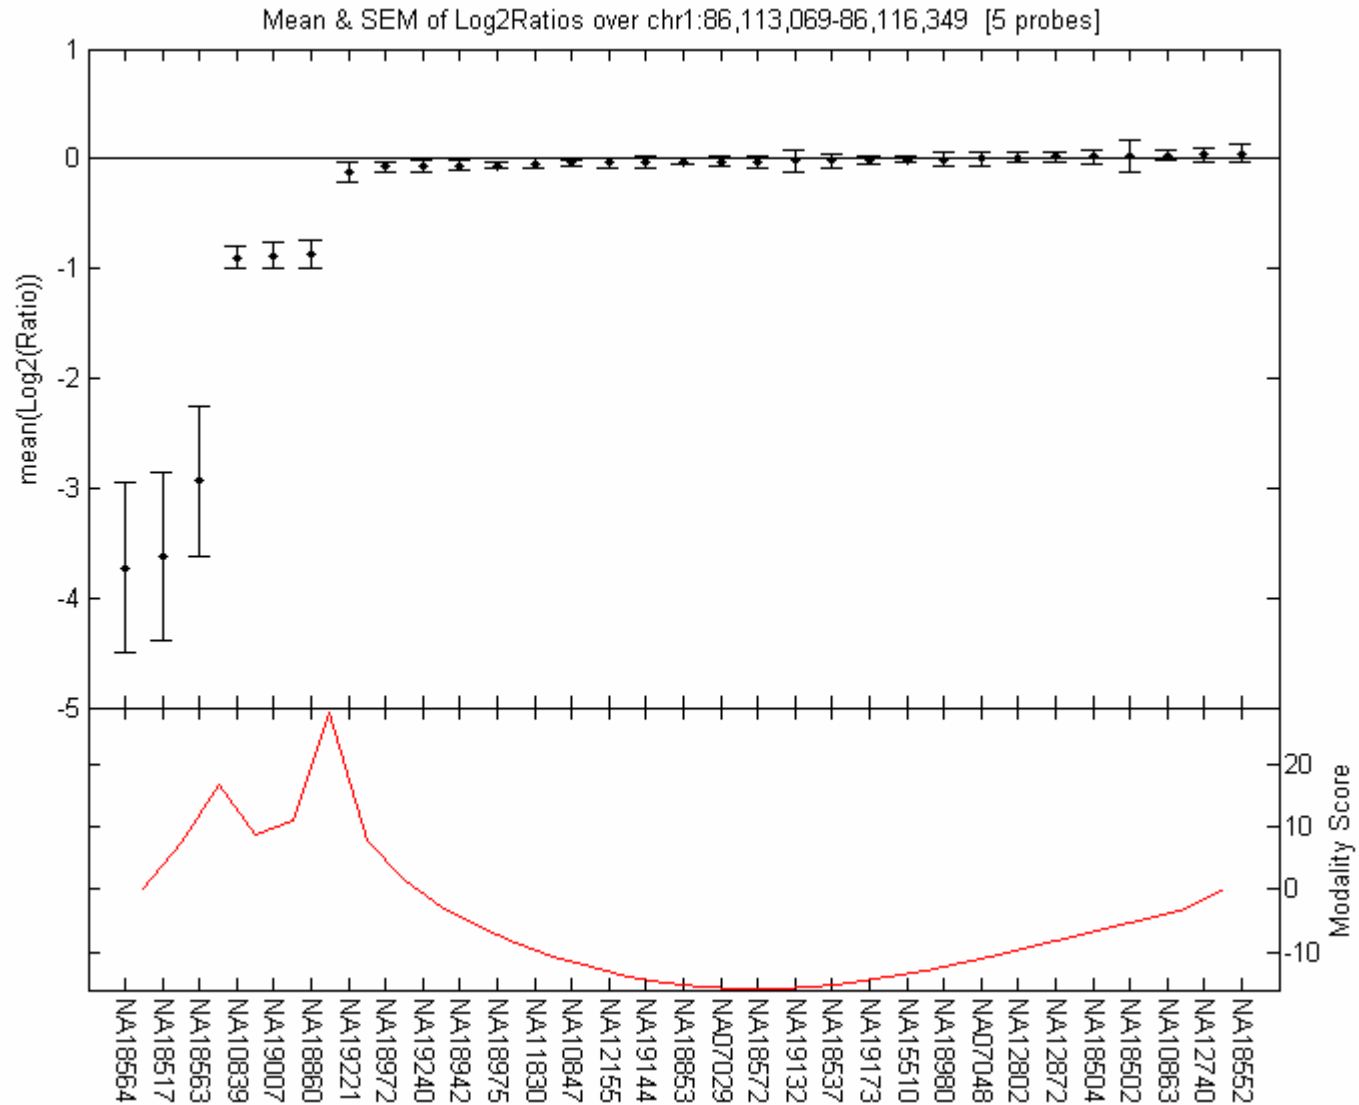



chr1:105,728,503-105,734,532 Score=11.4494

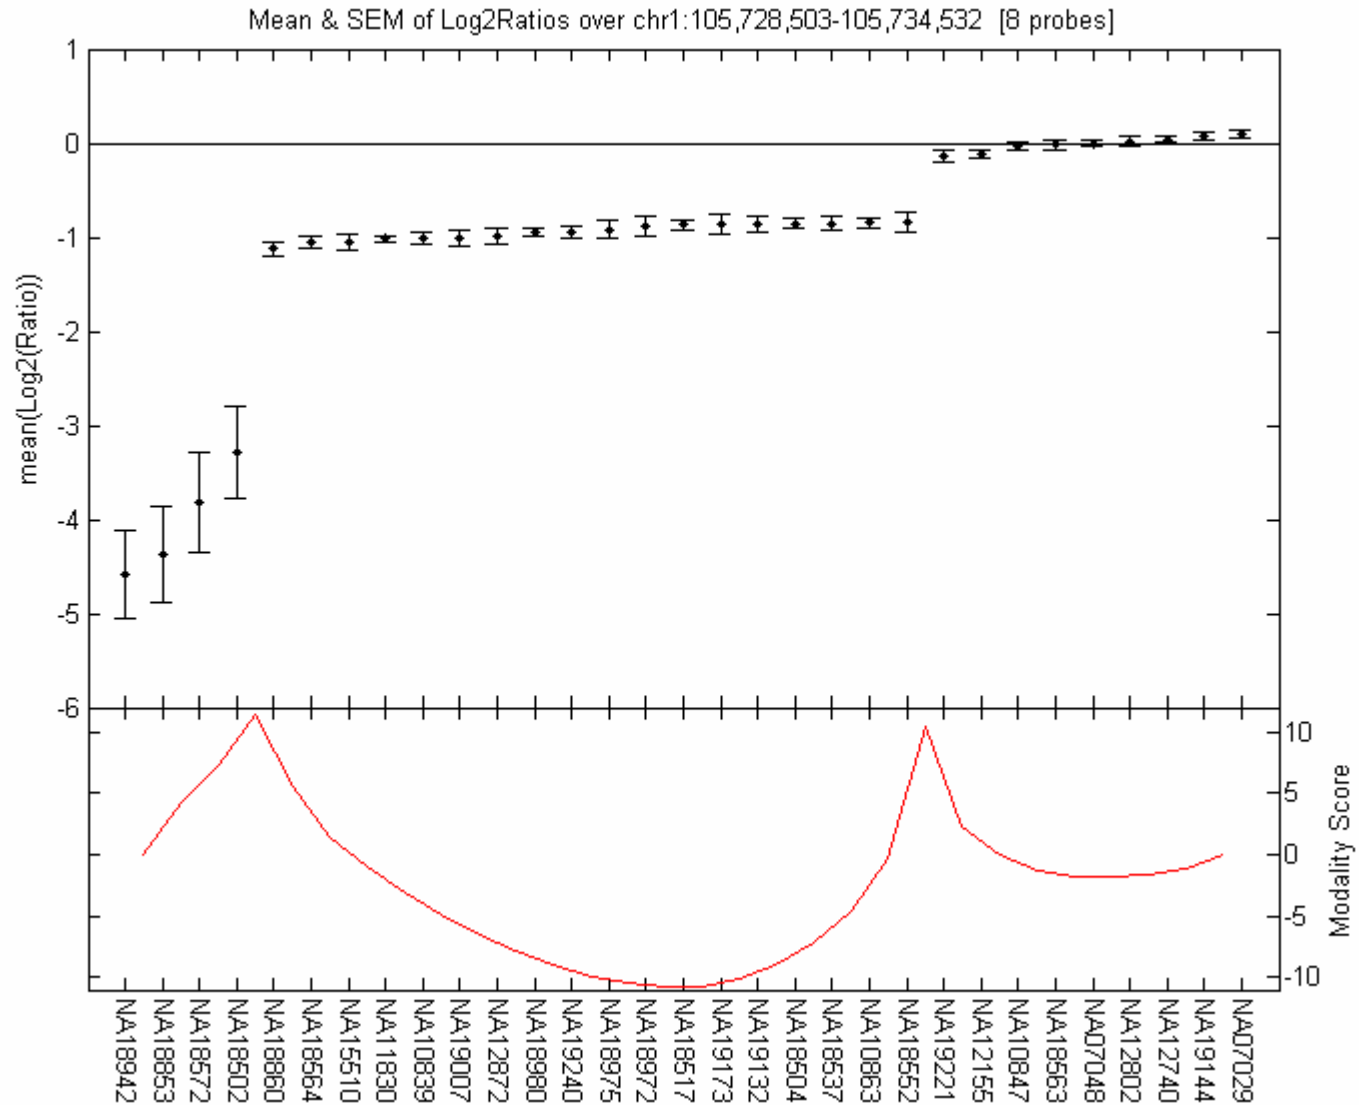

chr1:108,445,466-108,449,224 Score=15.8818

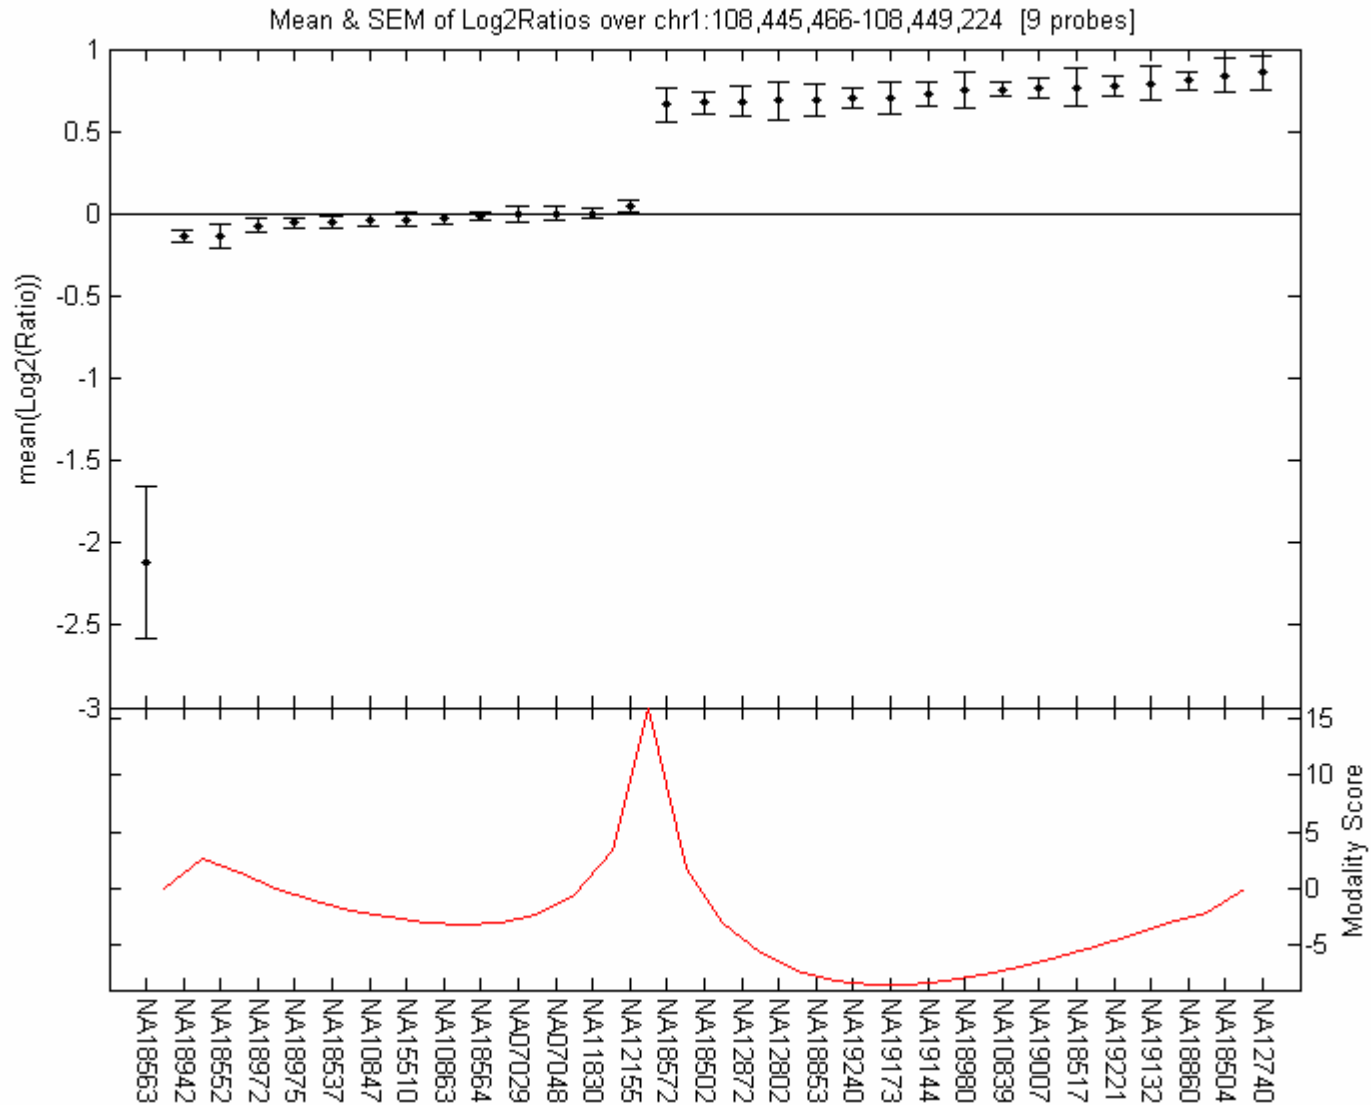

chr1:108,485,001-108,485,002 Score=11.0726

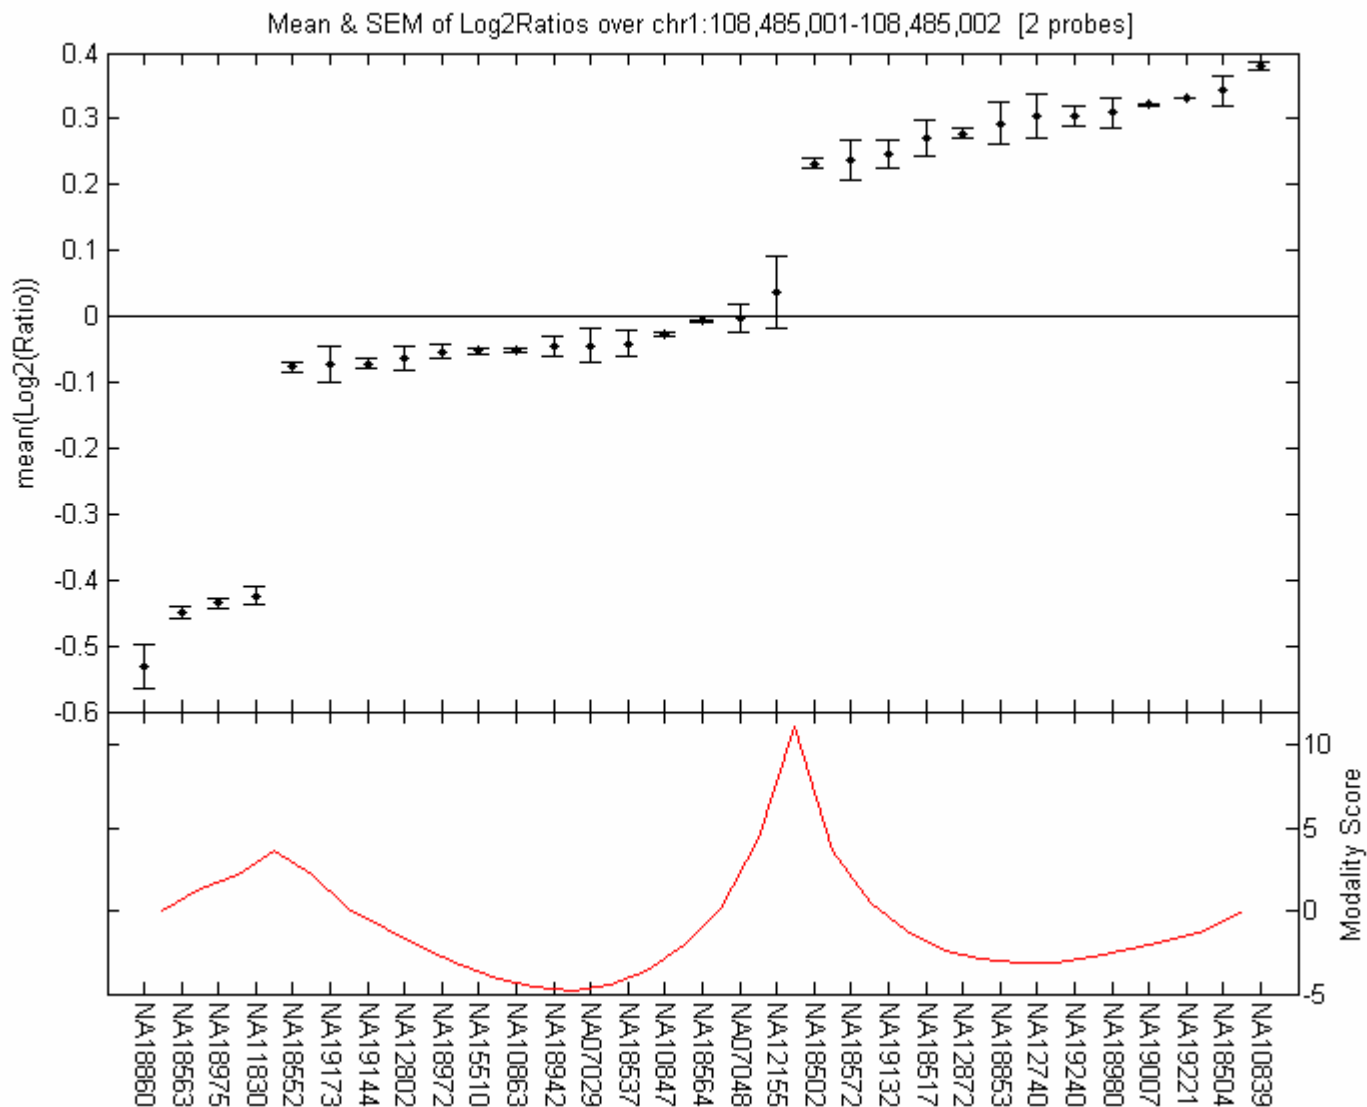

chr1:108,718,668-108,718,669 Score=11.0726

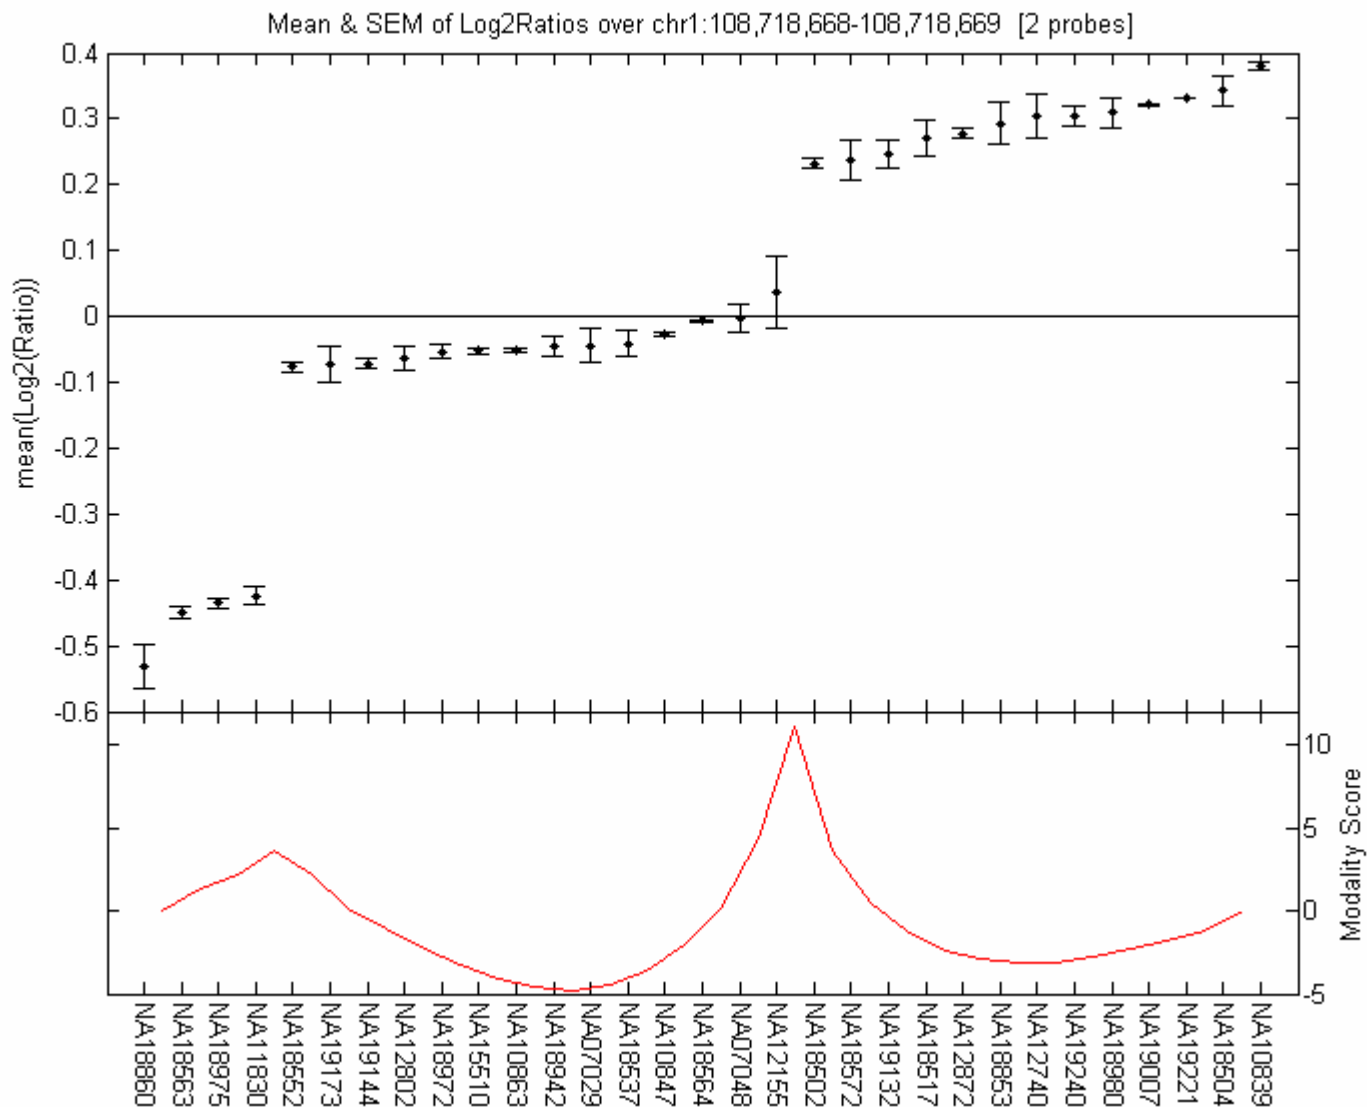

chr1:111,090,640-111,100,119 Score=24.3852

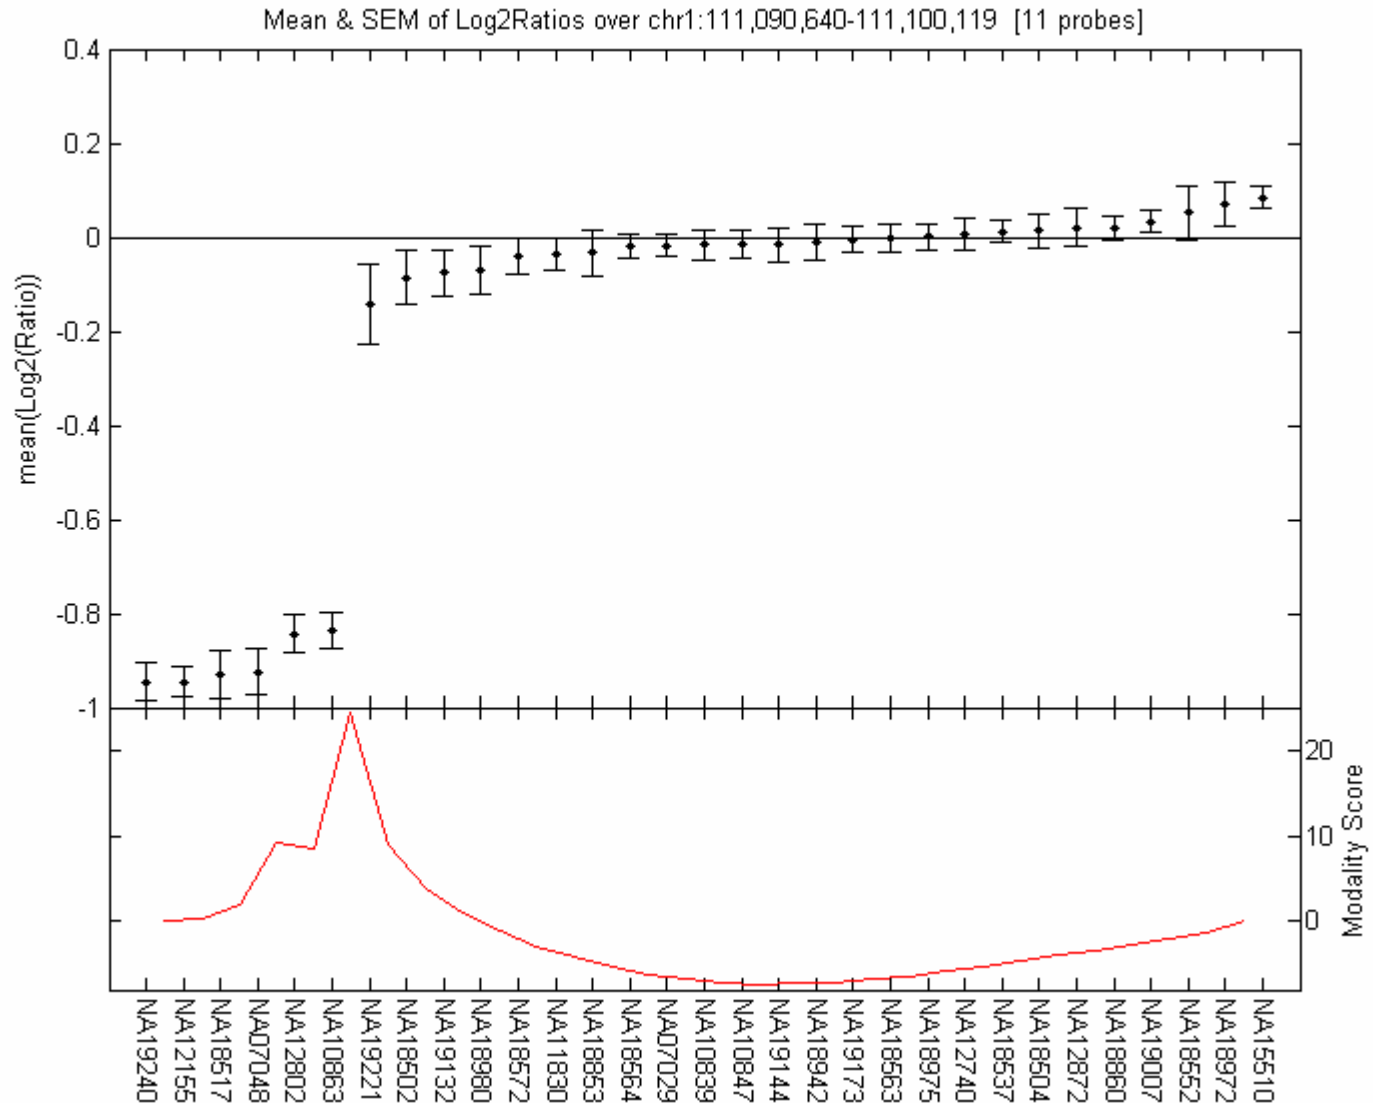

chr1:112,406,389-112,416,423 Score=11.99

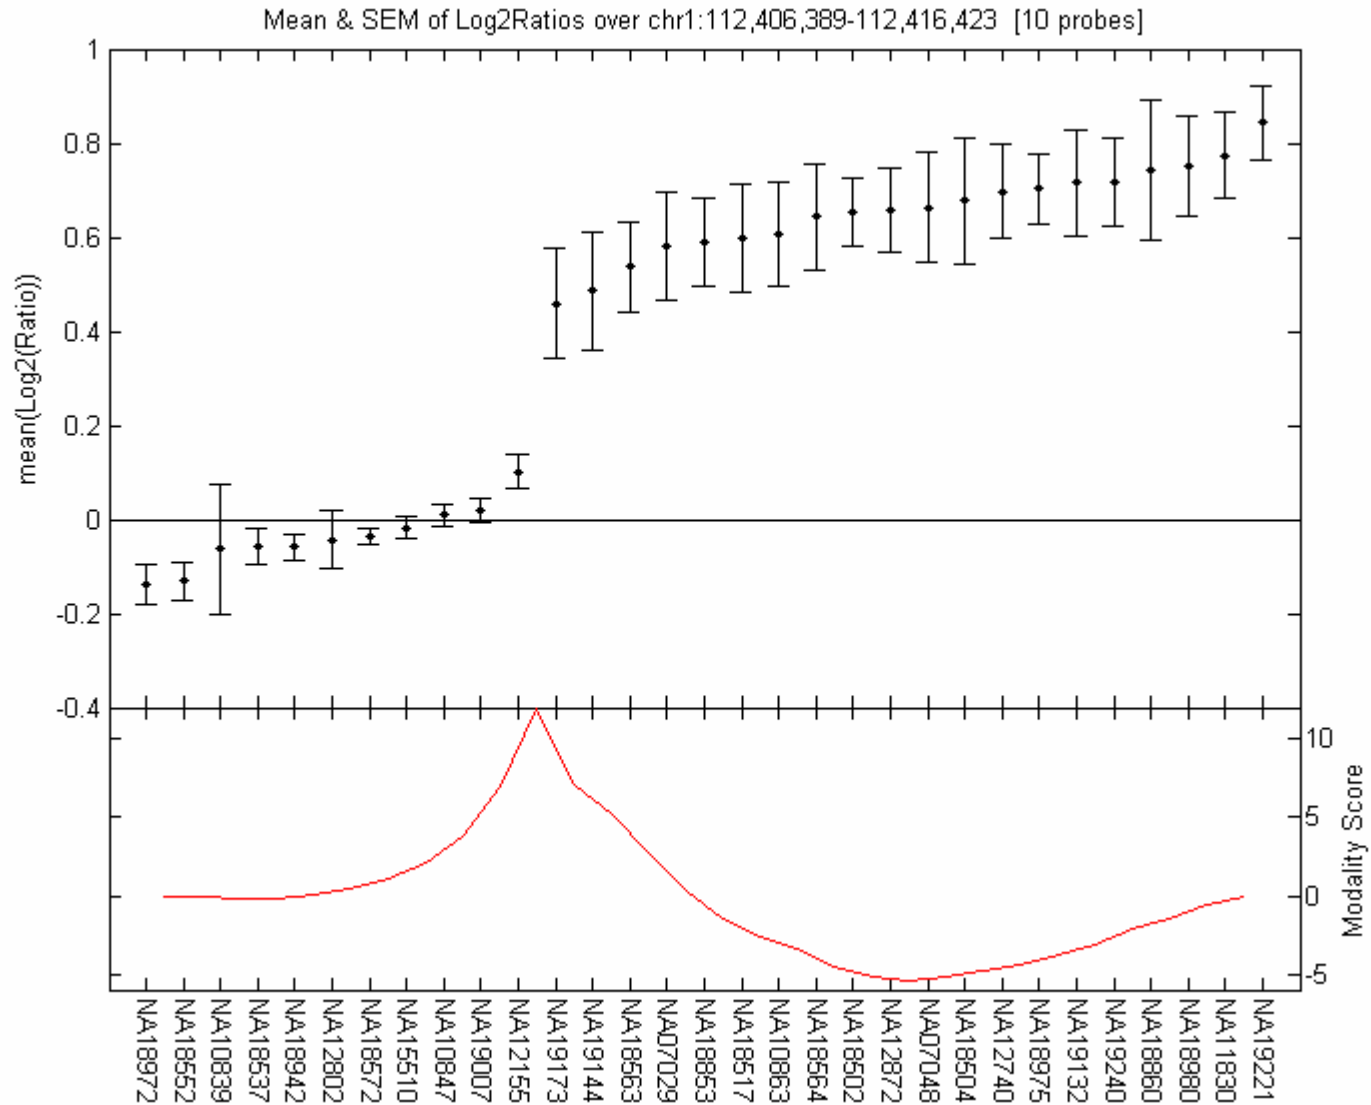

chr1:148,146,411-148,220,778 Score=23.5727

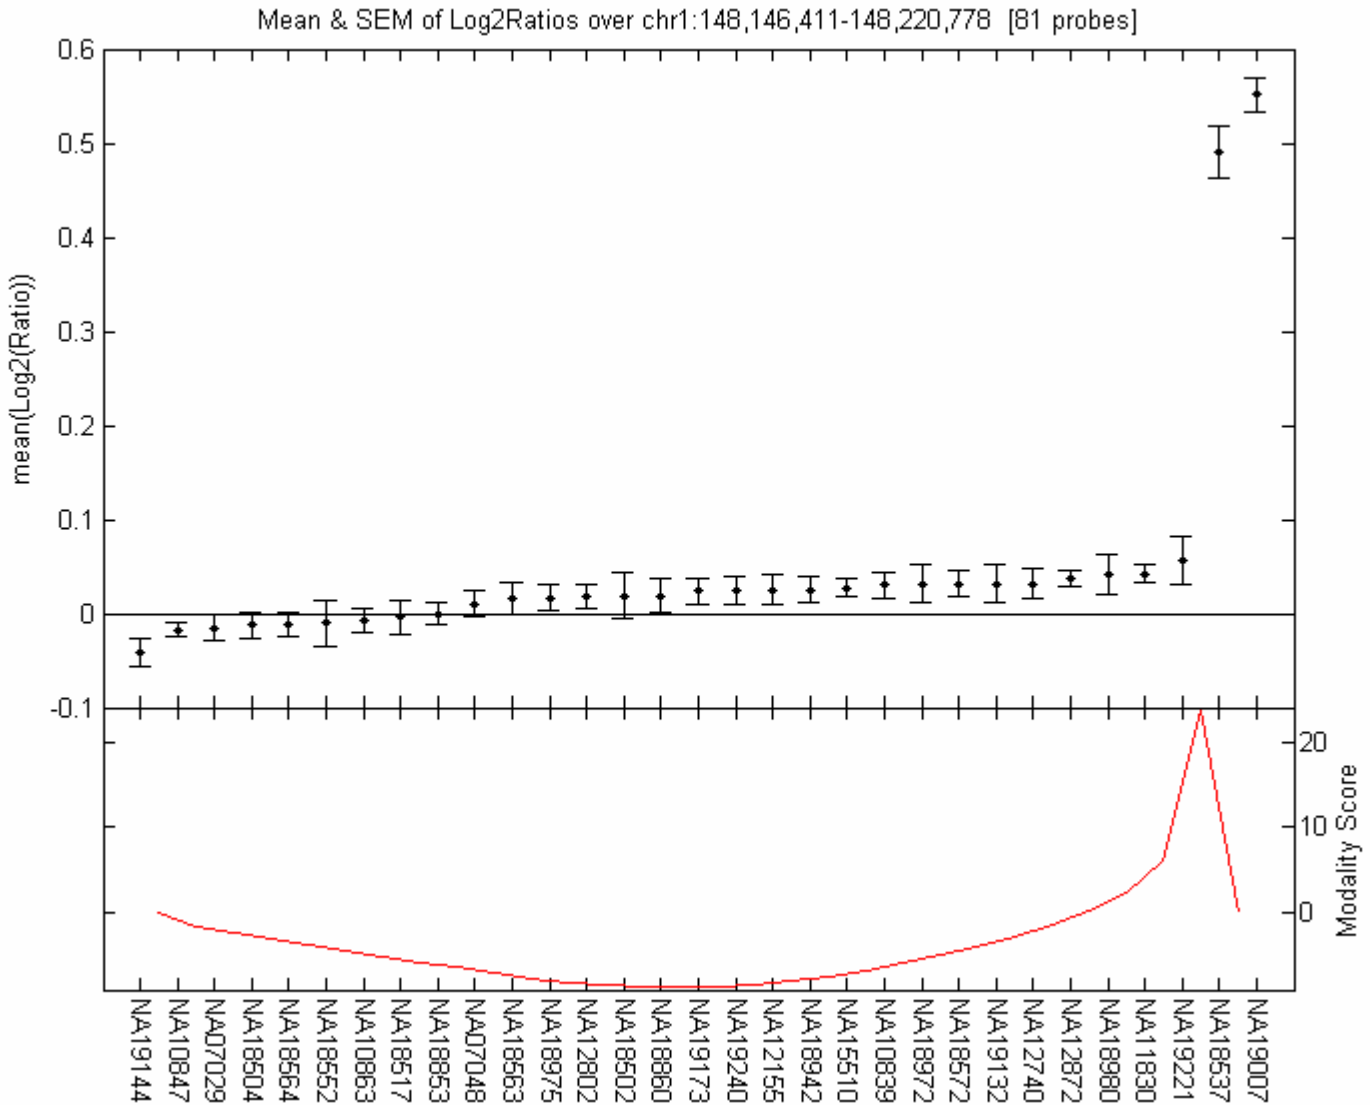

chr1:149,573,460-149,582,912 Score=17.3505

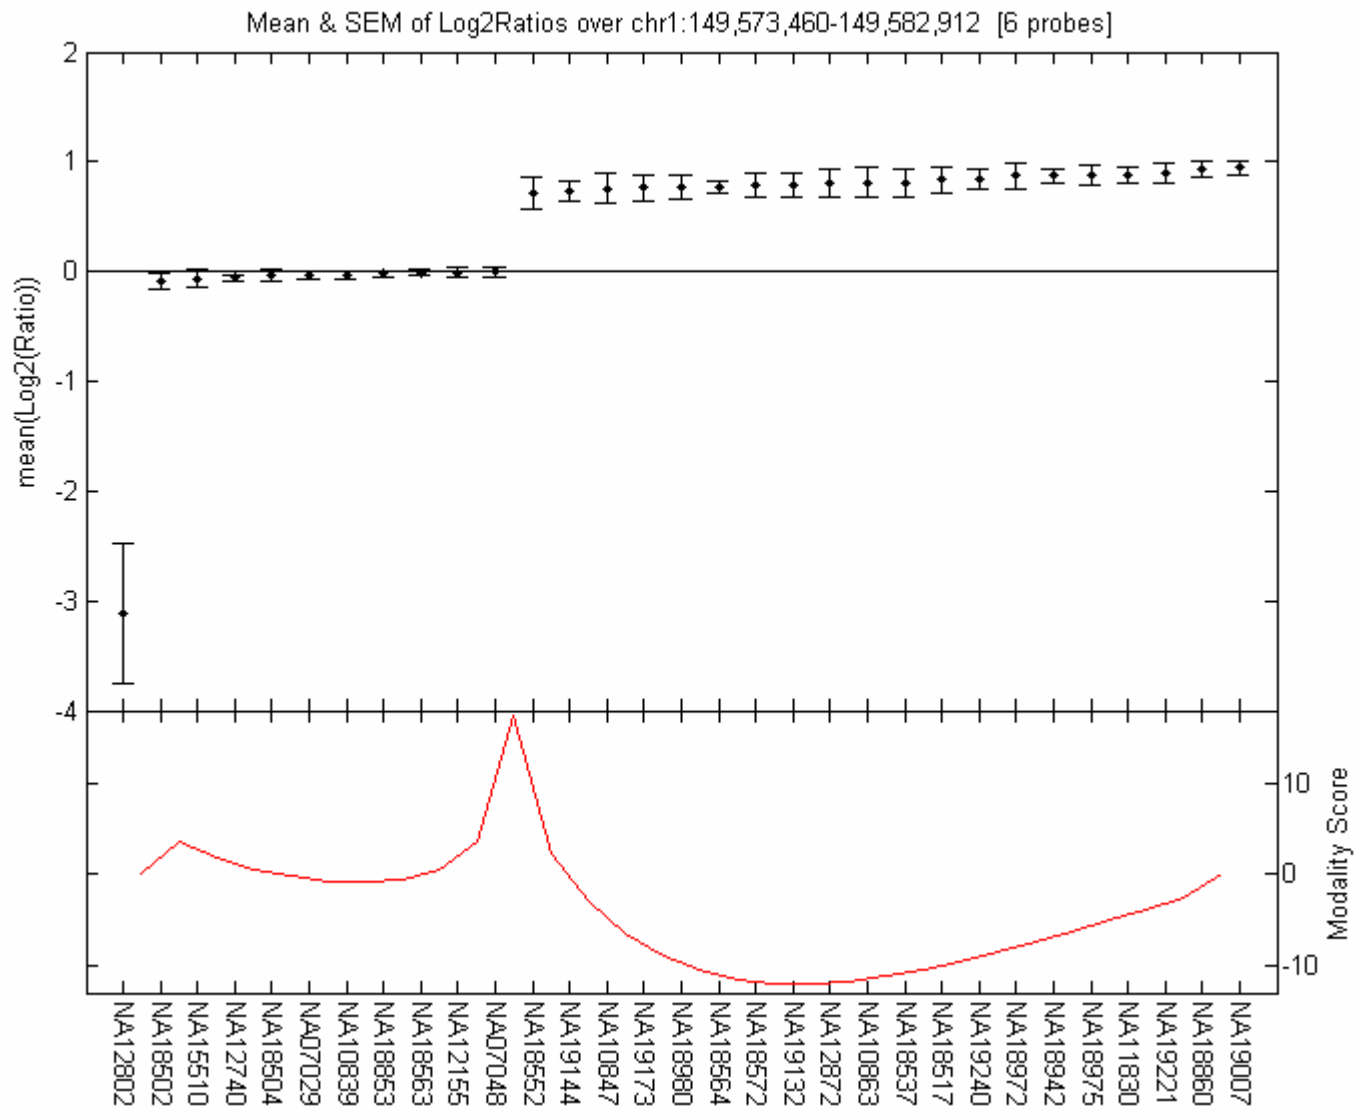



chr1:171,528,423-171,533,245 Score=20.4506

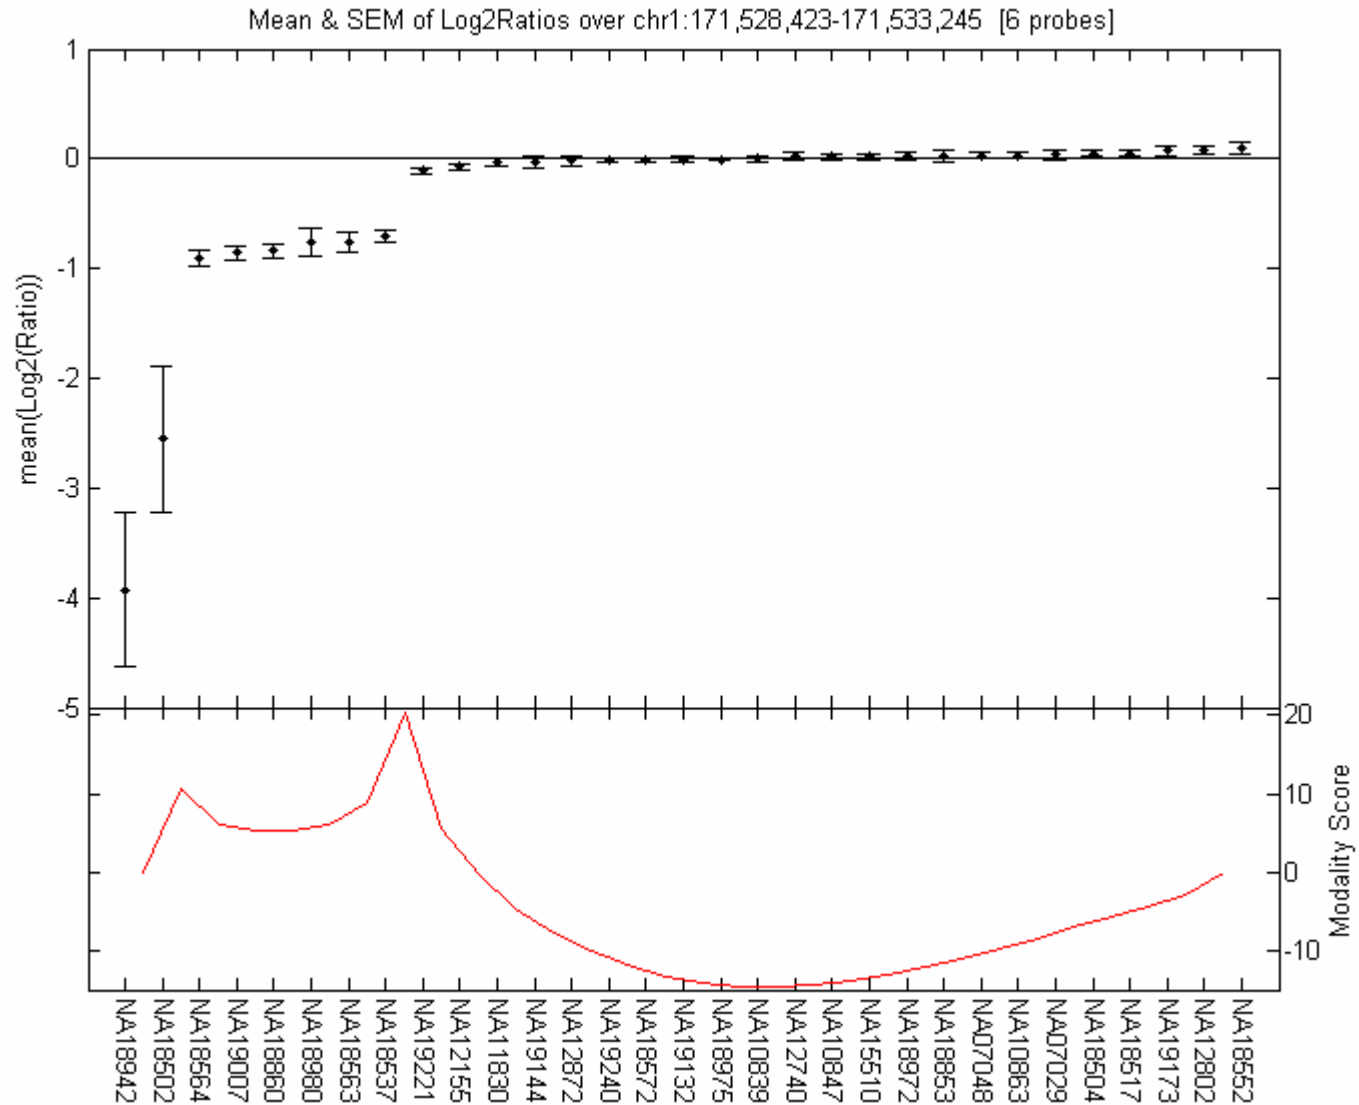

chr1:204,230,383-204,235,034 Score=19.2317

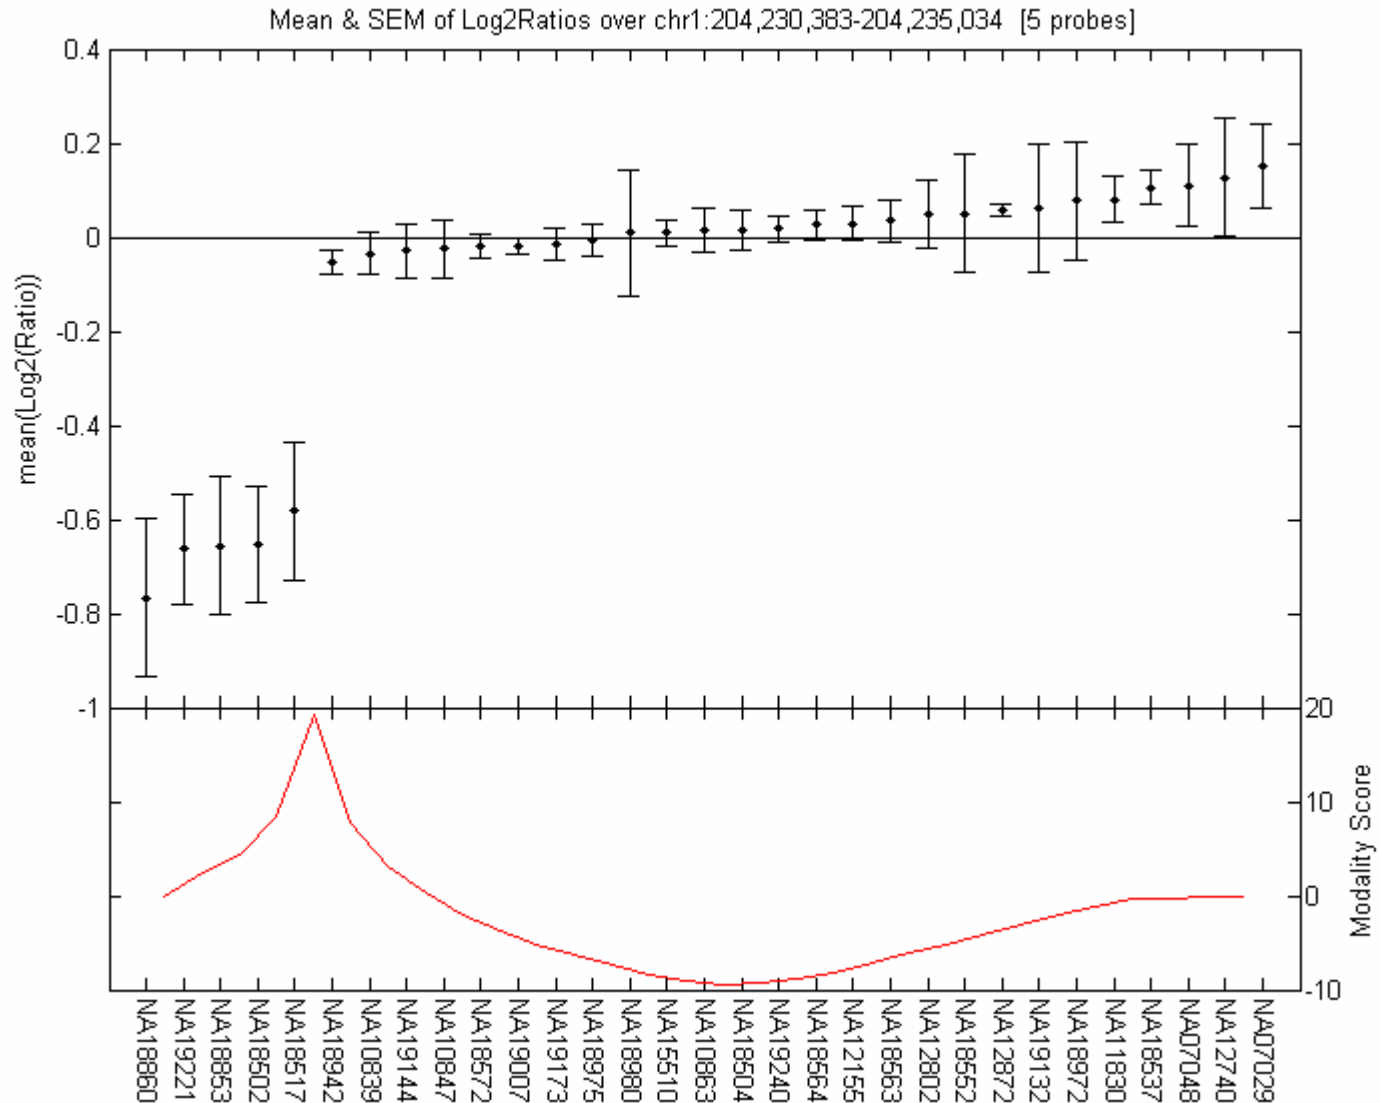

chr1:209,391,215-209,401,777 Score=25.0966

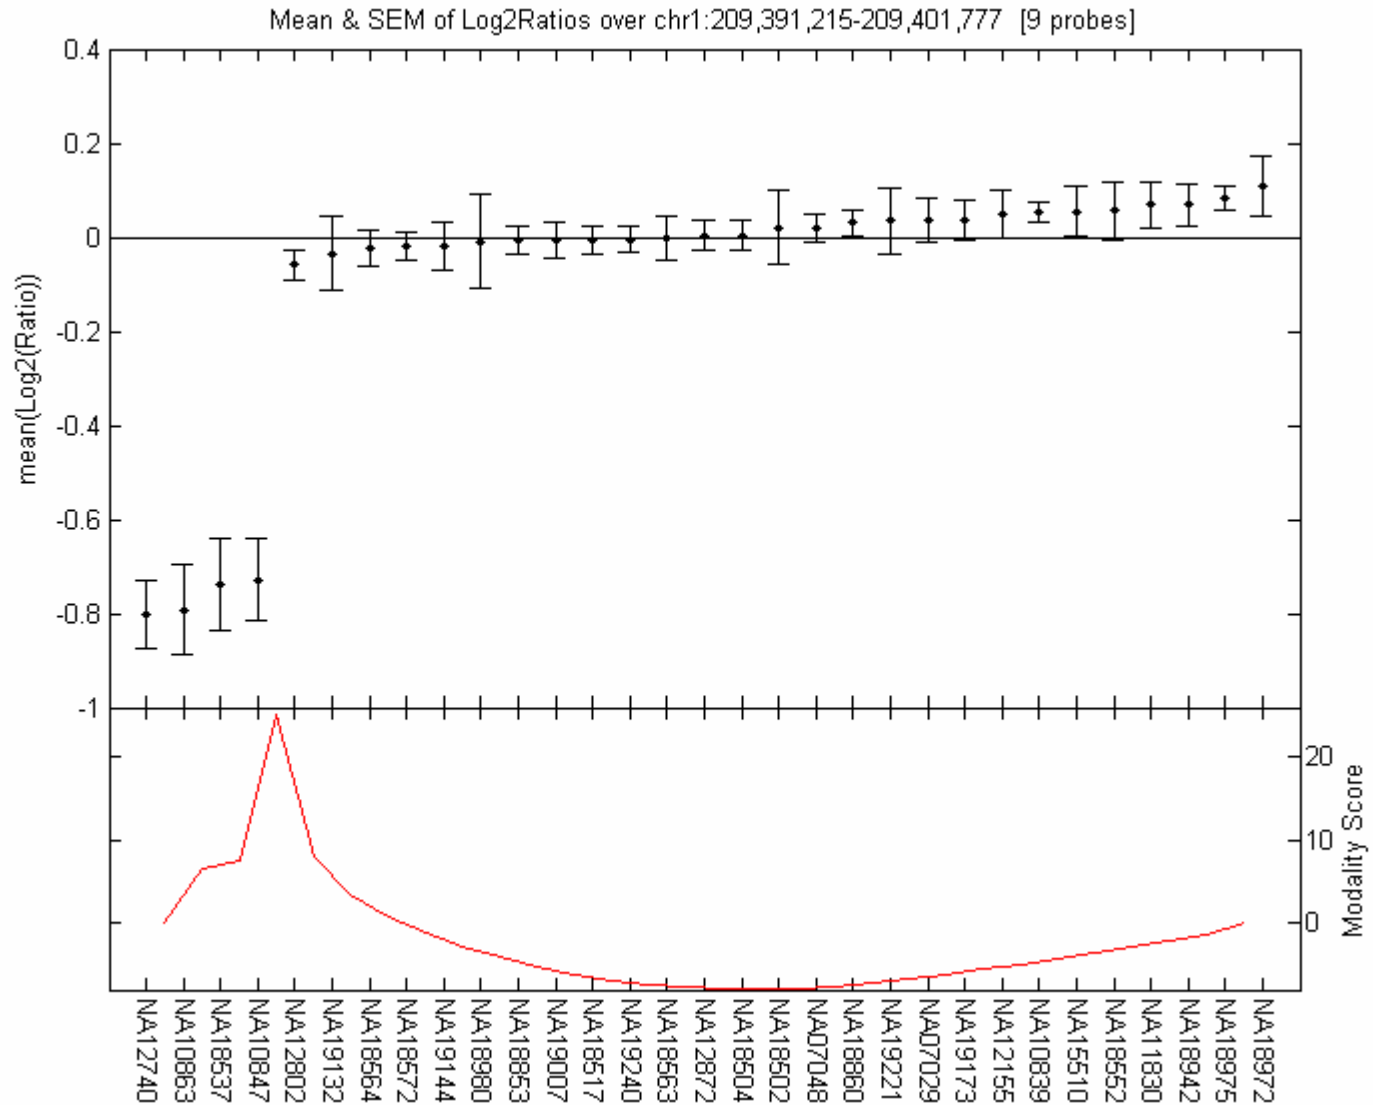

chr1:236,719,344-236,720,749 Score=12.6497

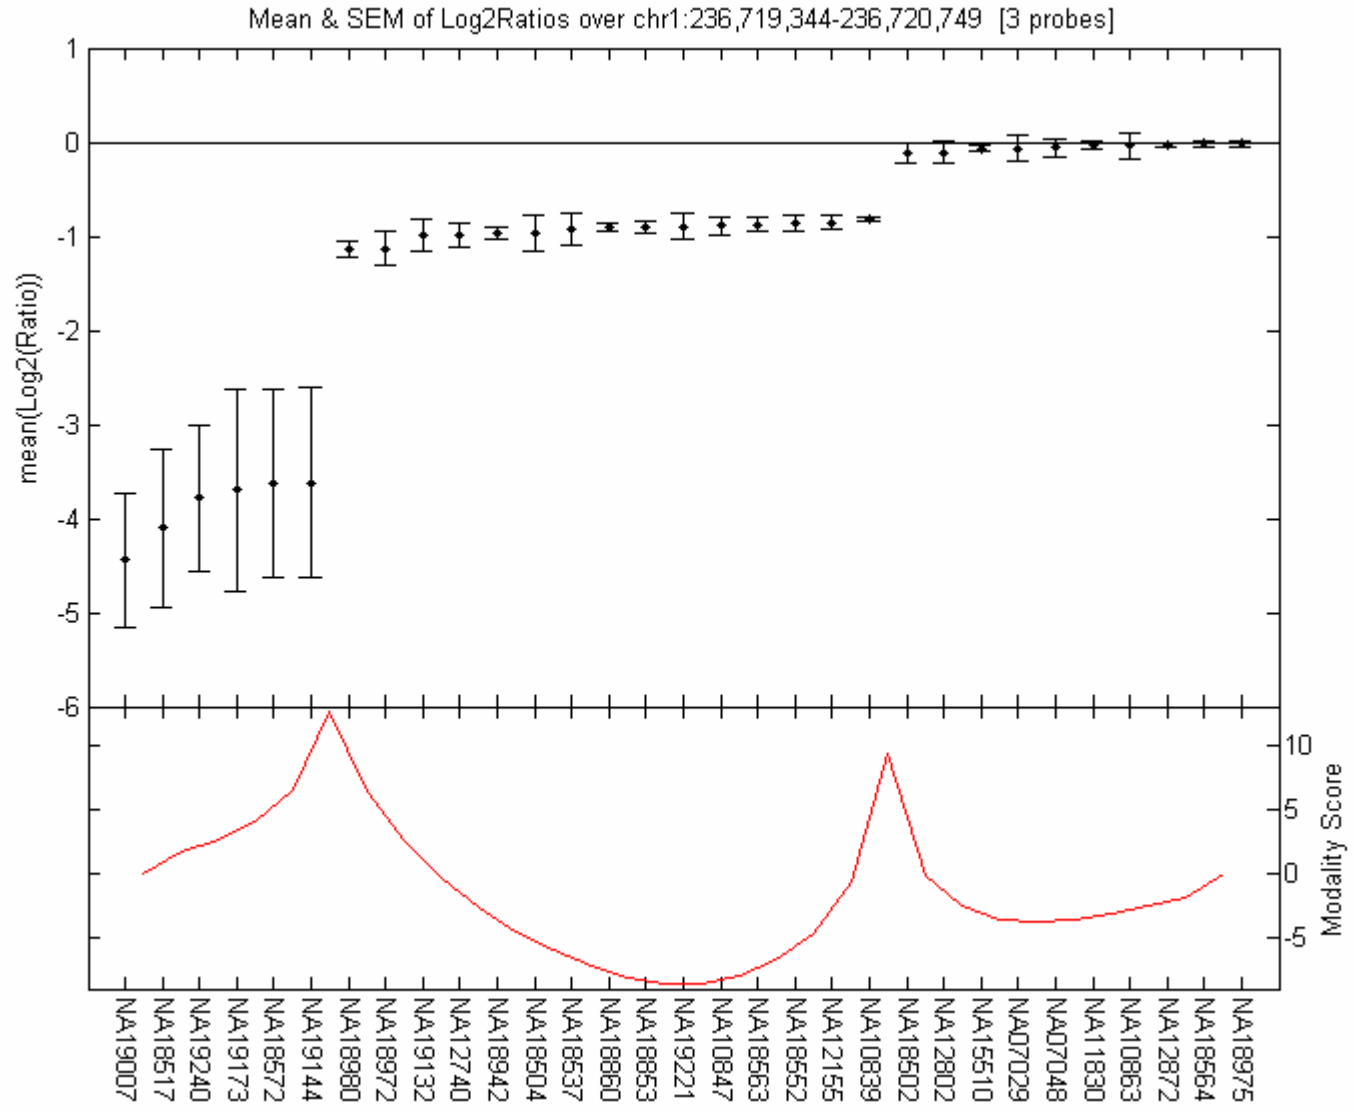

chr1:244,960,769-244,961,807 Score=11.9816

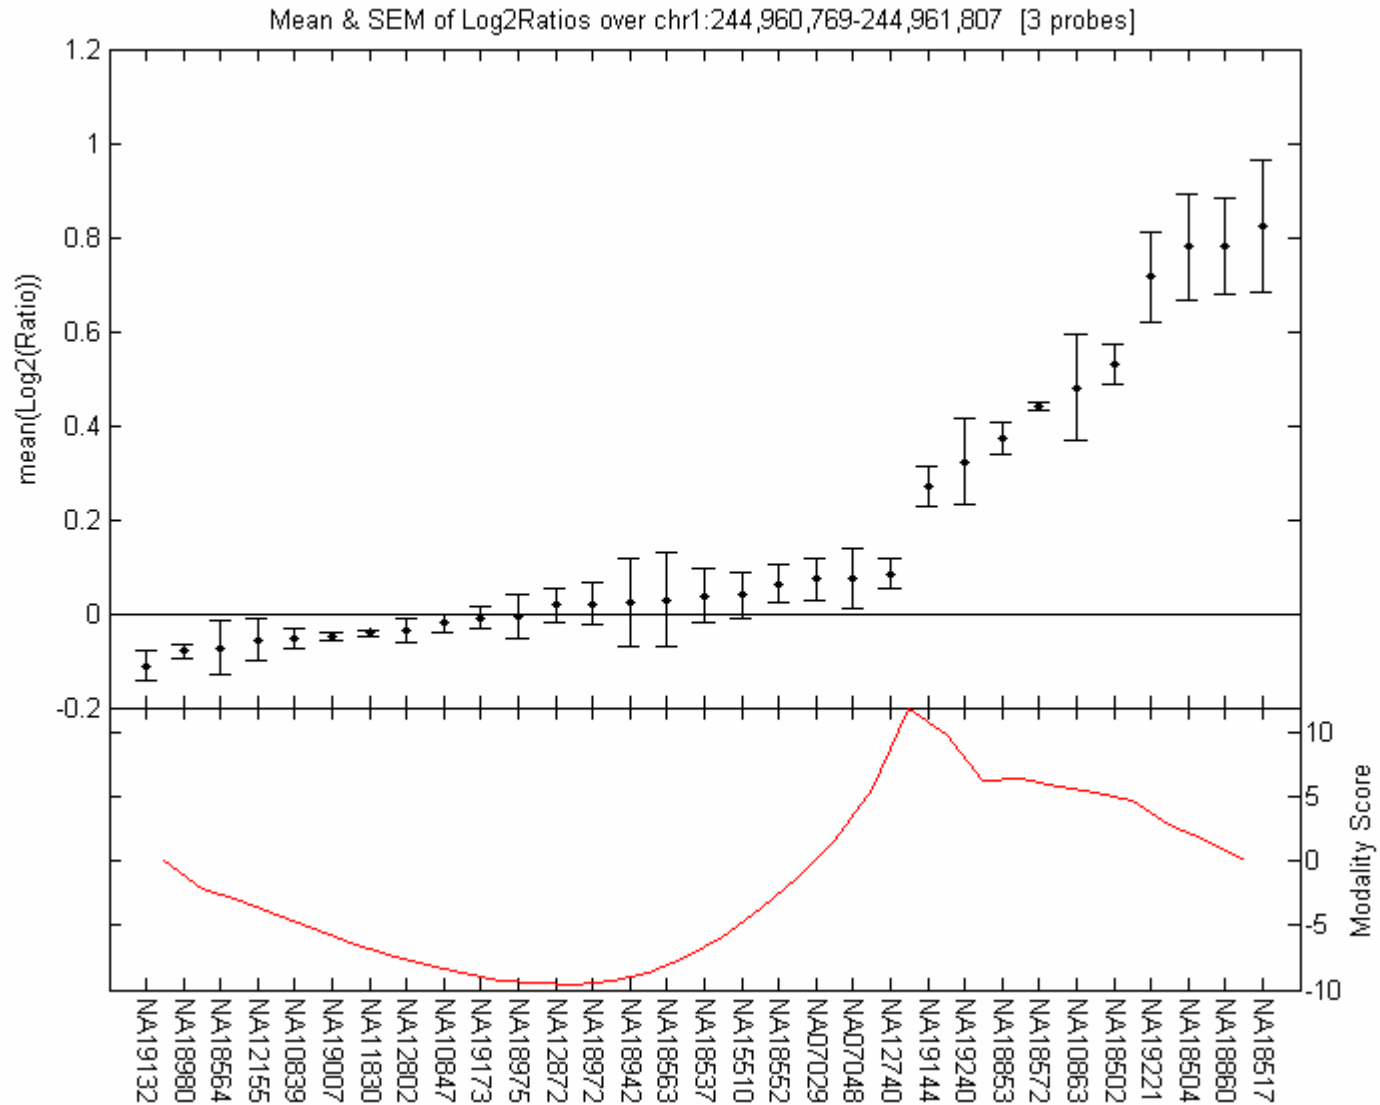

chr2:6,249,444-6,258,311 Score=23.1164

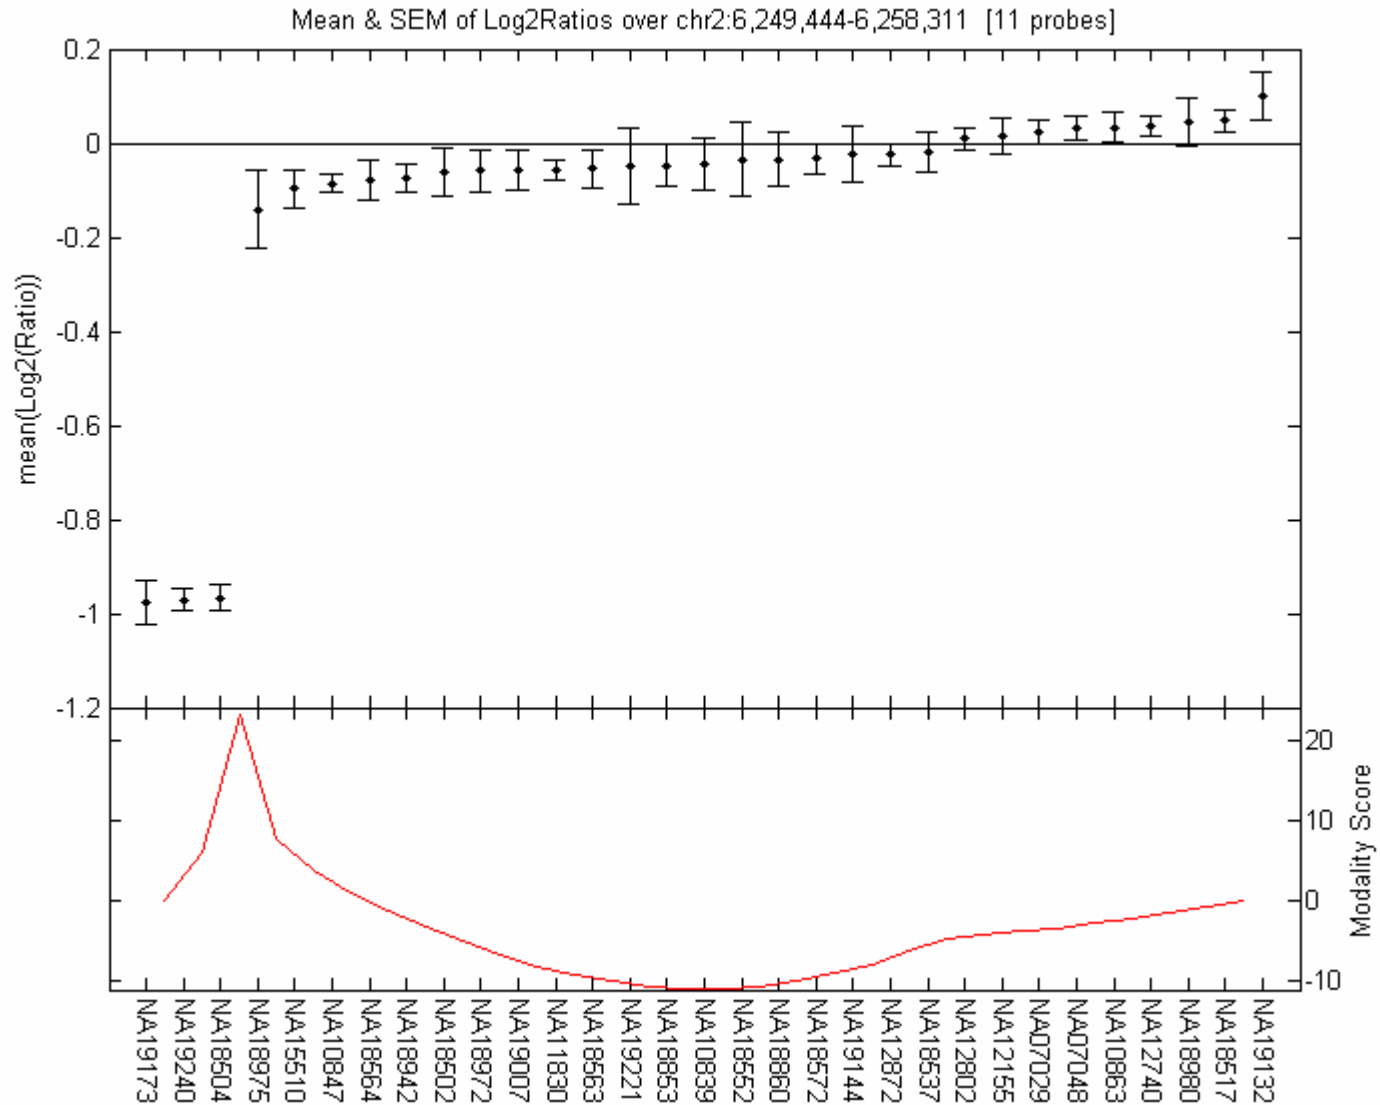

chr2:34,739,304-34,740,438 Score=12.2511

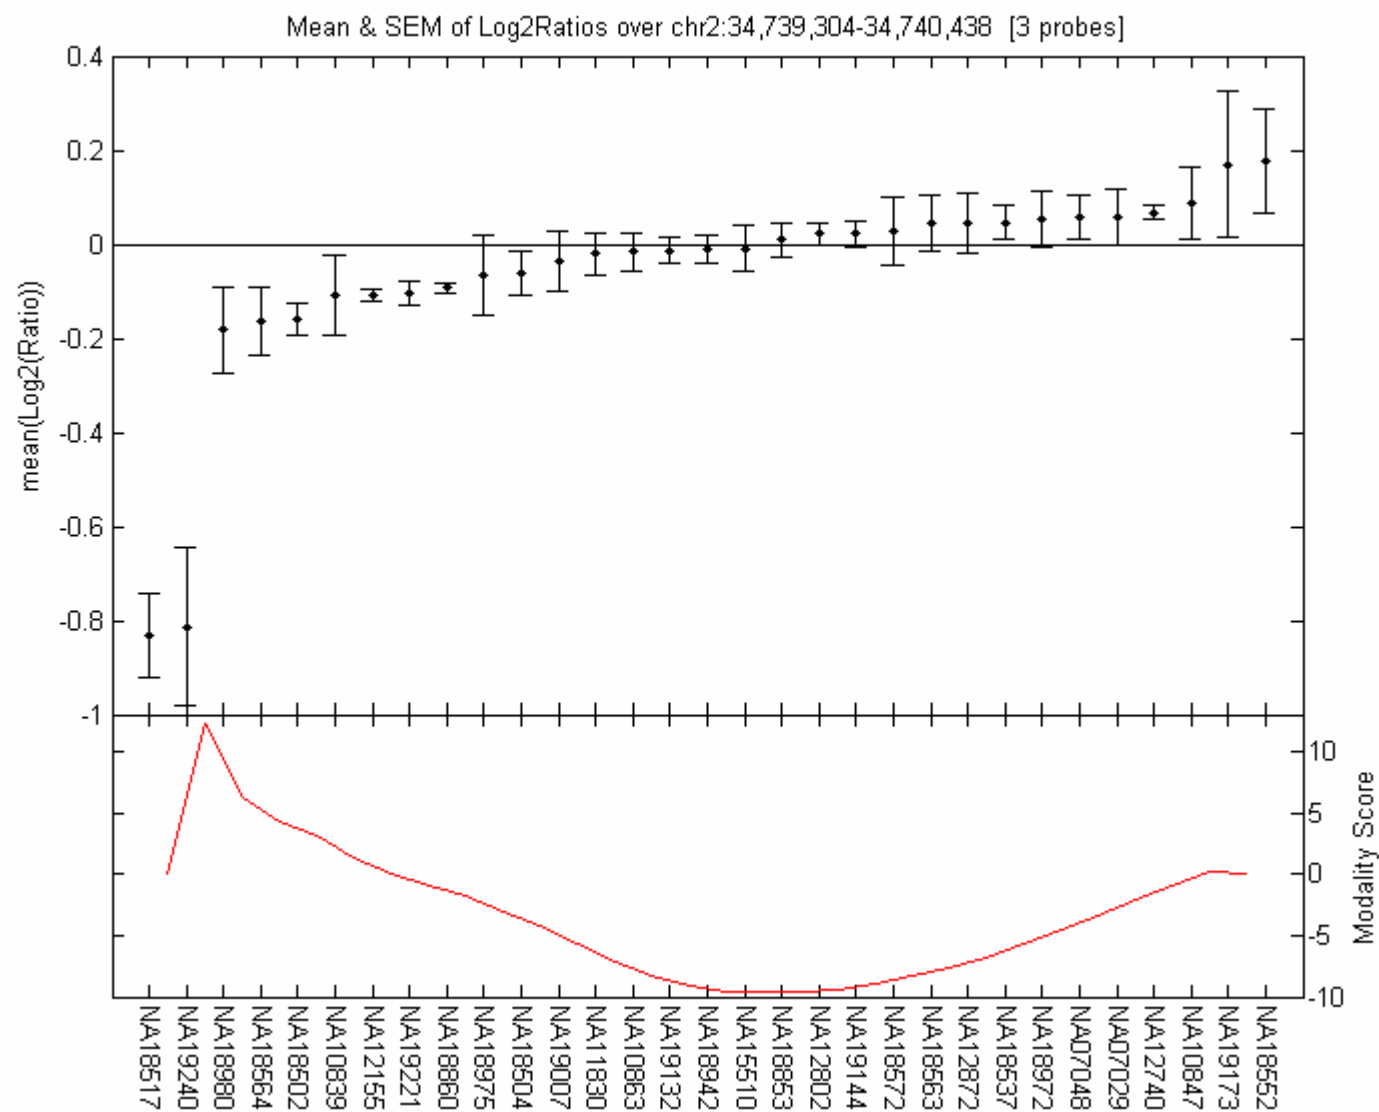

chr2:35,493,831-35,527,391 Score=21.5481

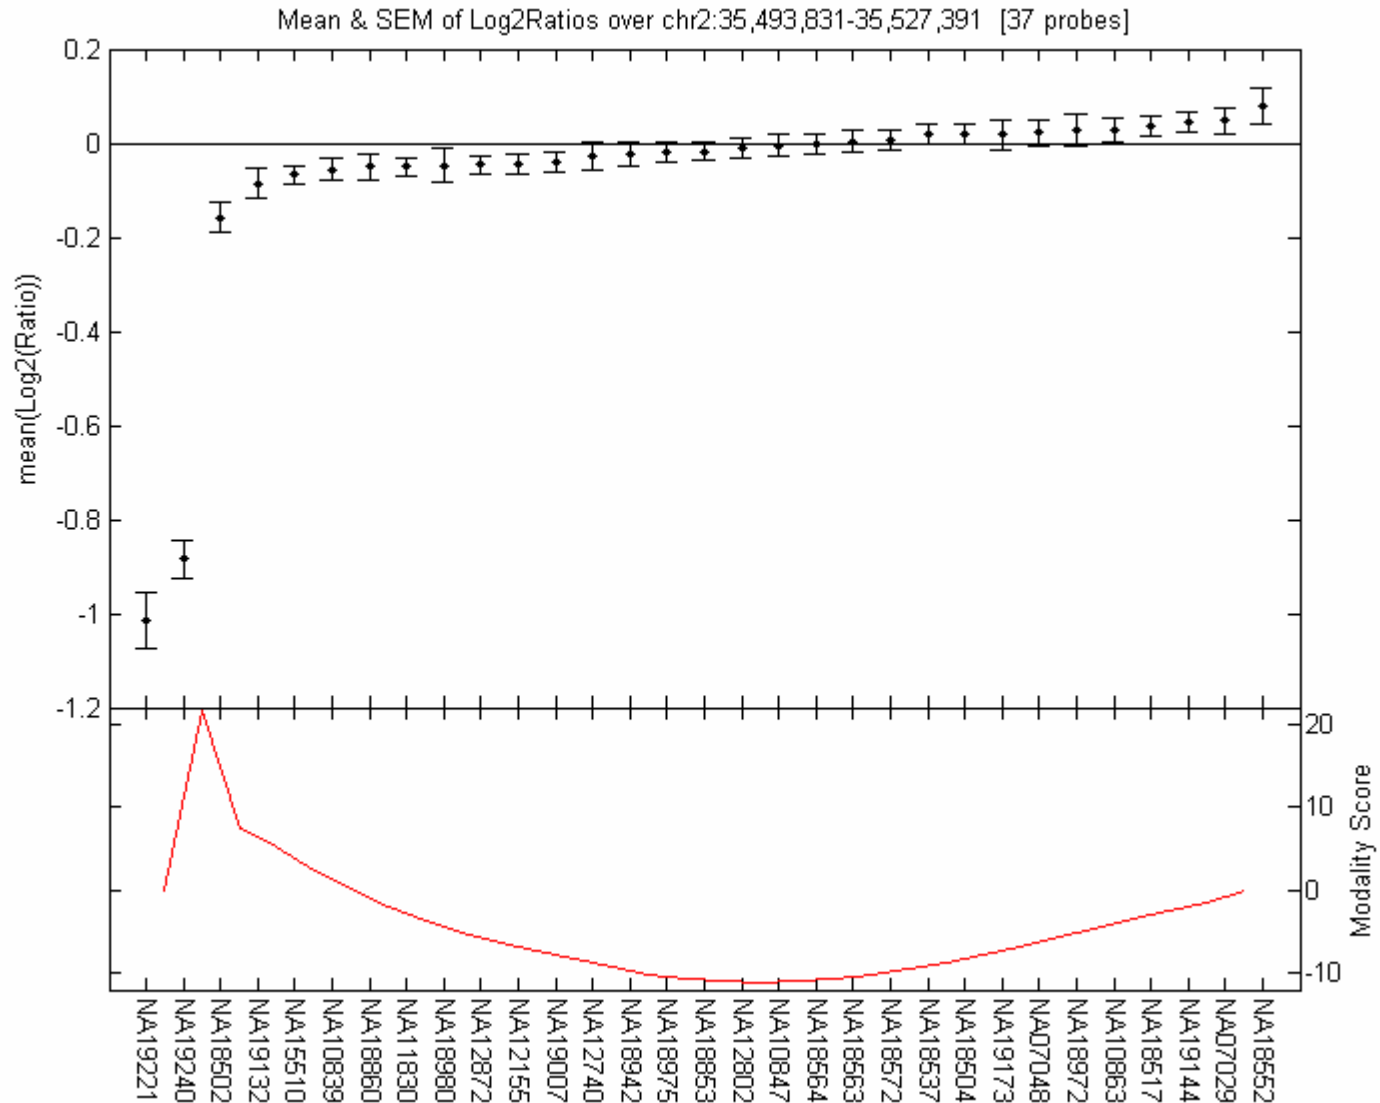



chr2:35,899,430-35,902,979 Score=14.7833

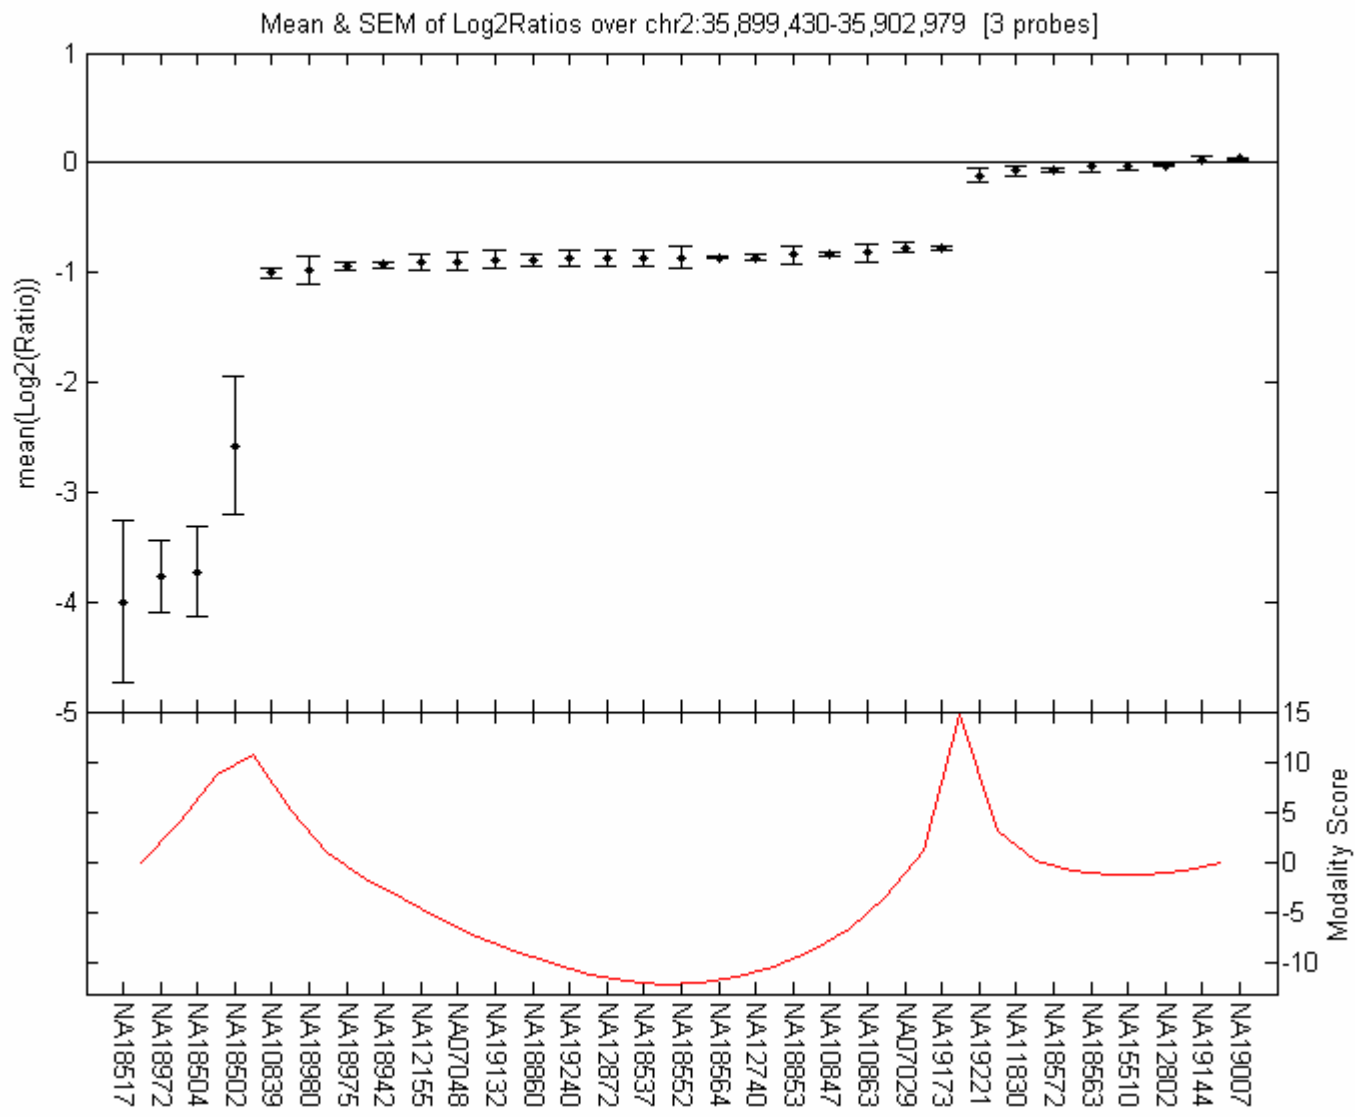

chr2:36,248,382-36,250,956 Score=17.0272

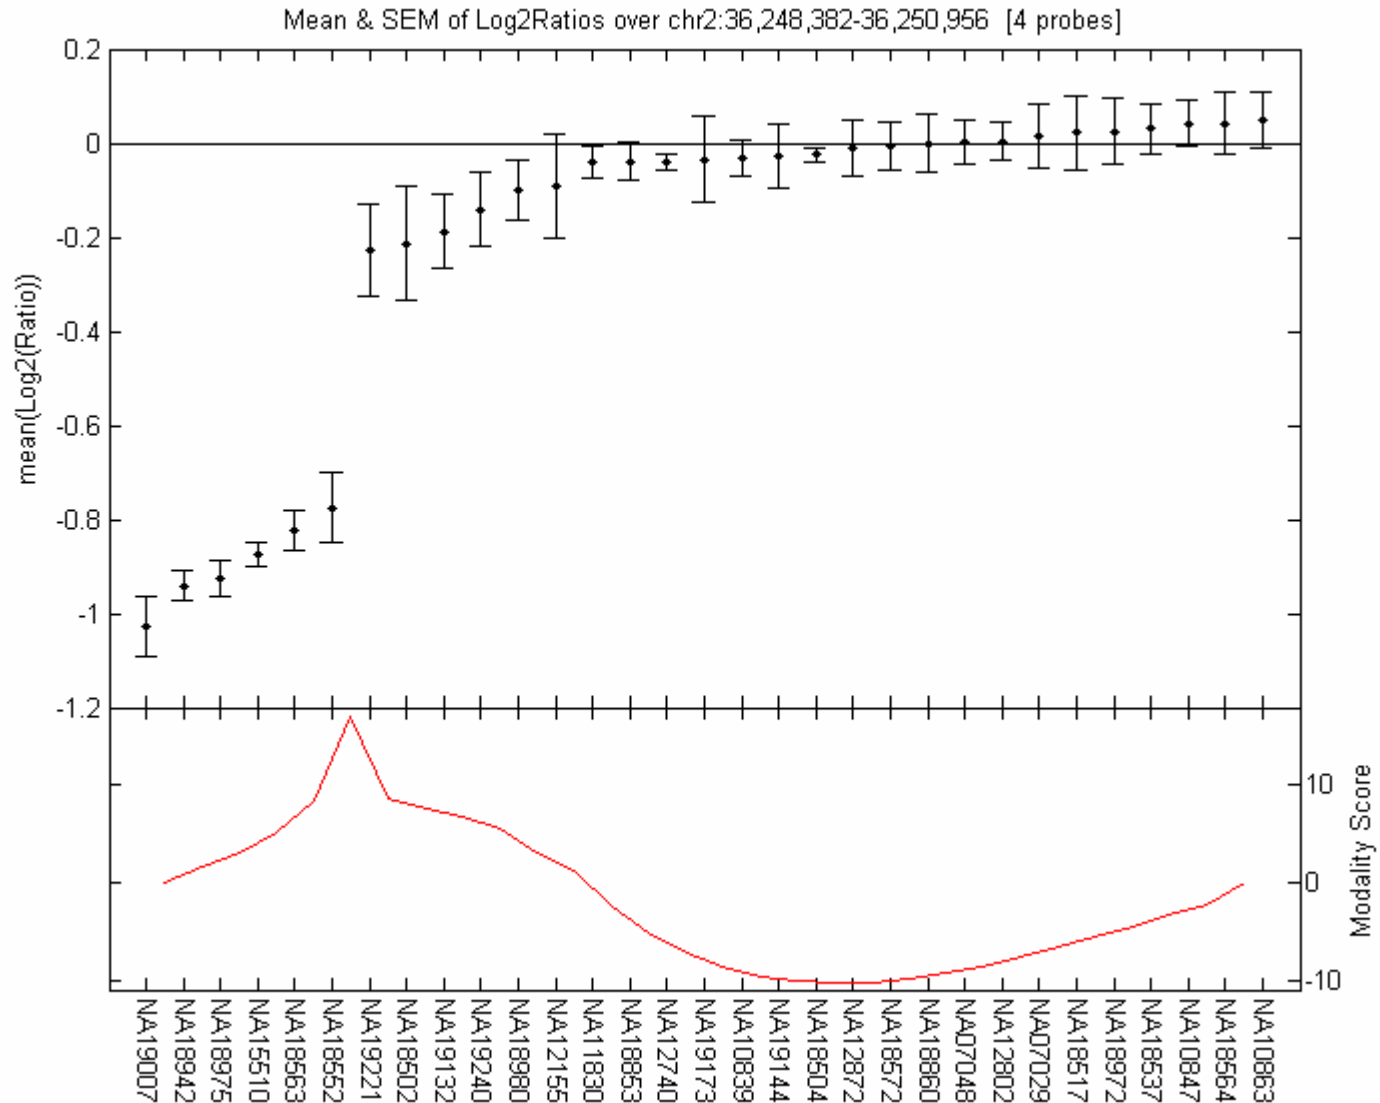

chr2:41,150,471-41,160,114 Score=15.0202

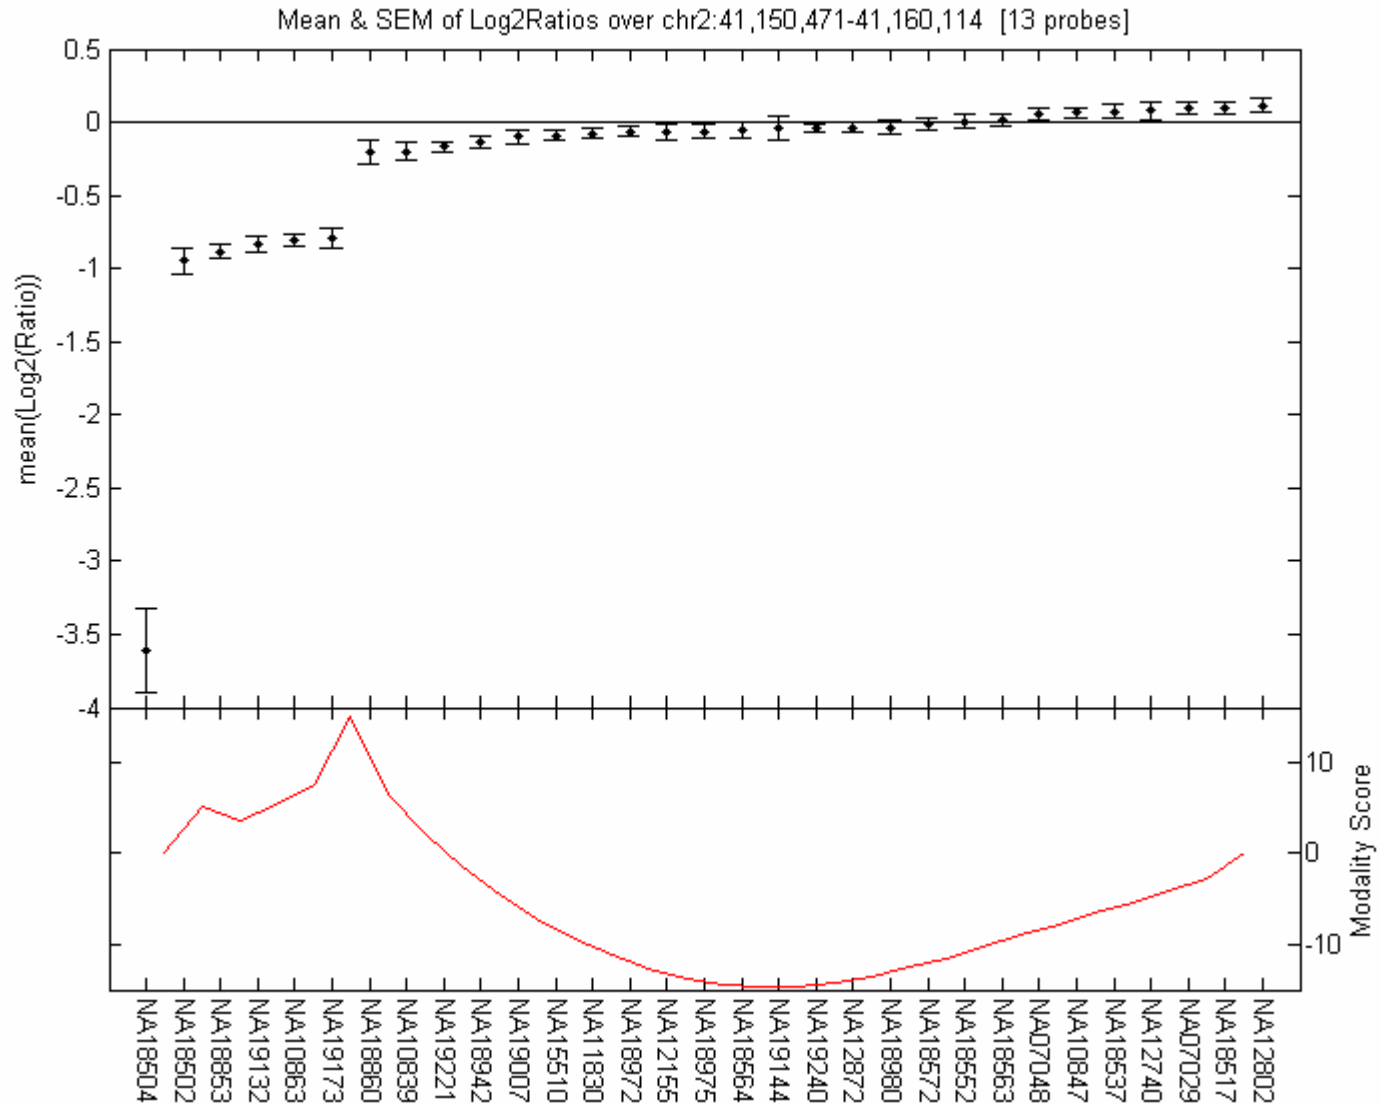

chr2:44,378,636-44,379,703 Score=22.8638

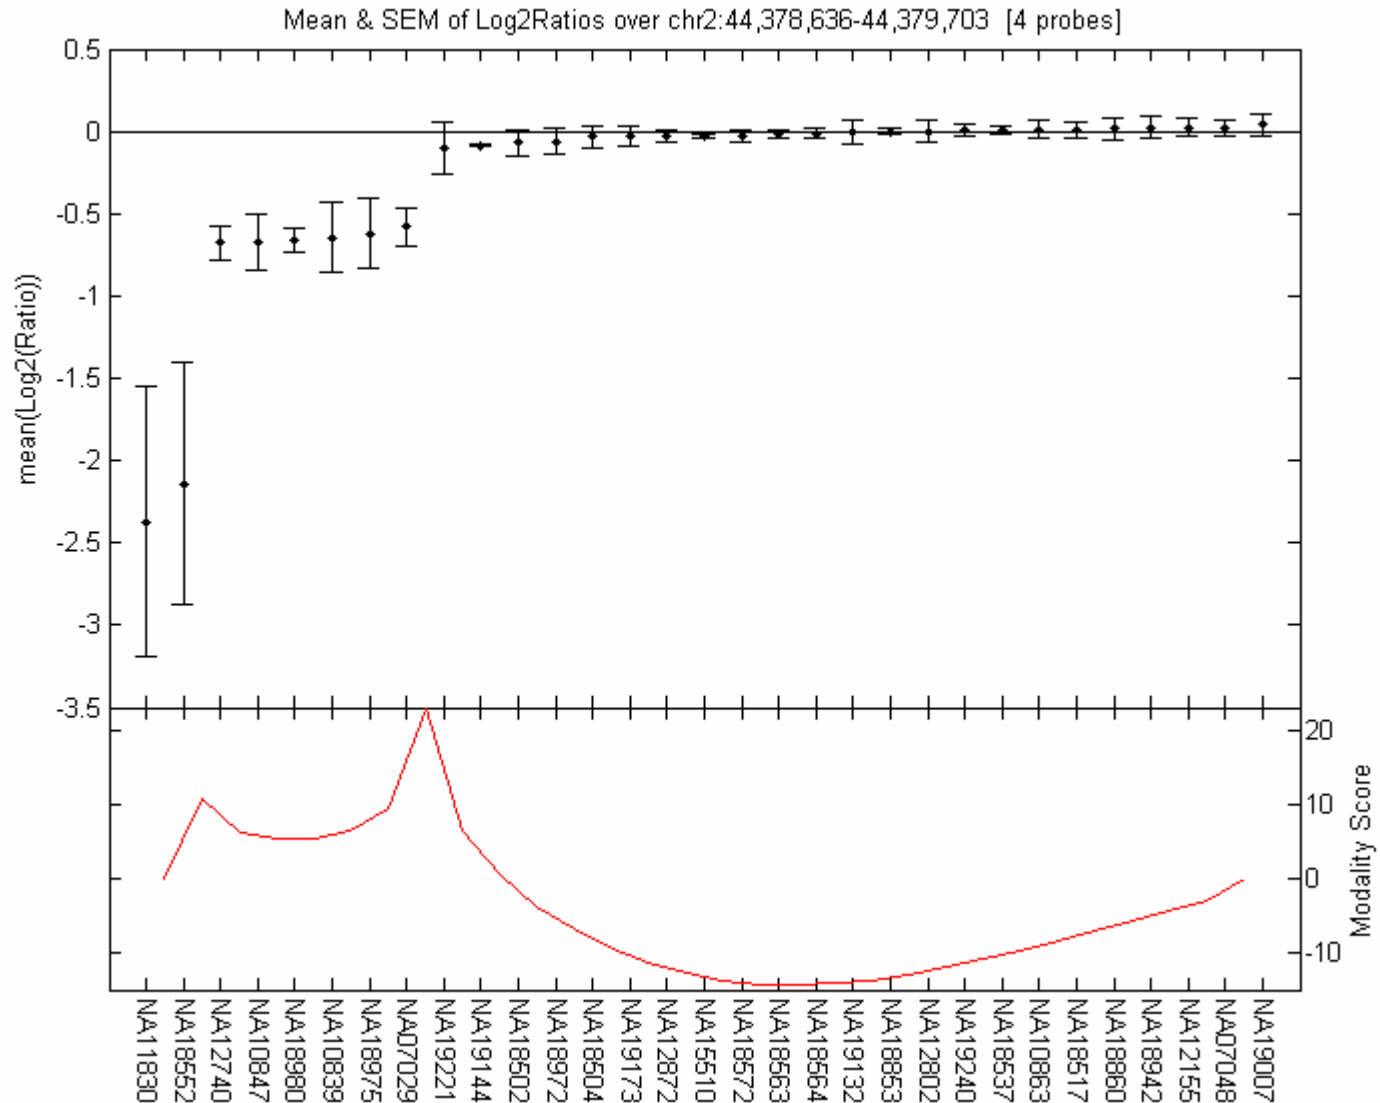

chr2:51,838,229-51,839,379 Score=22.6689

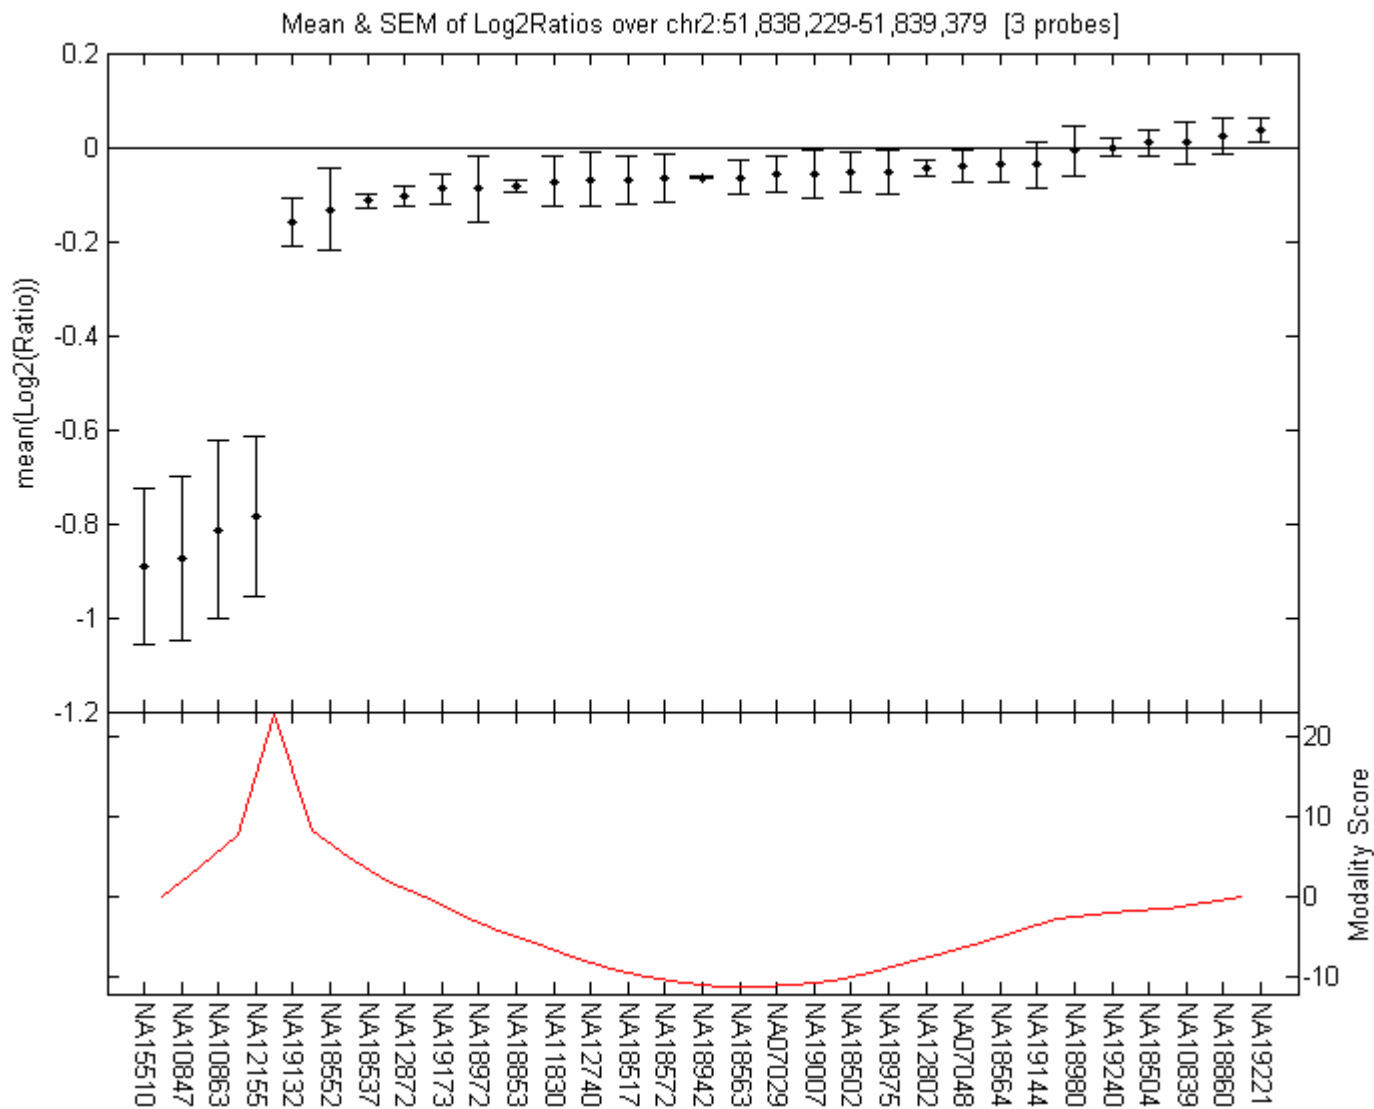

chr2:52,661,928-52,696,416 Score=14.4558

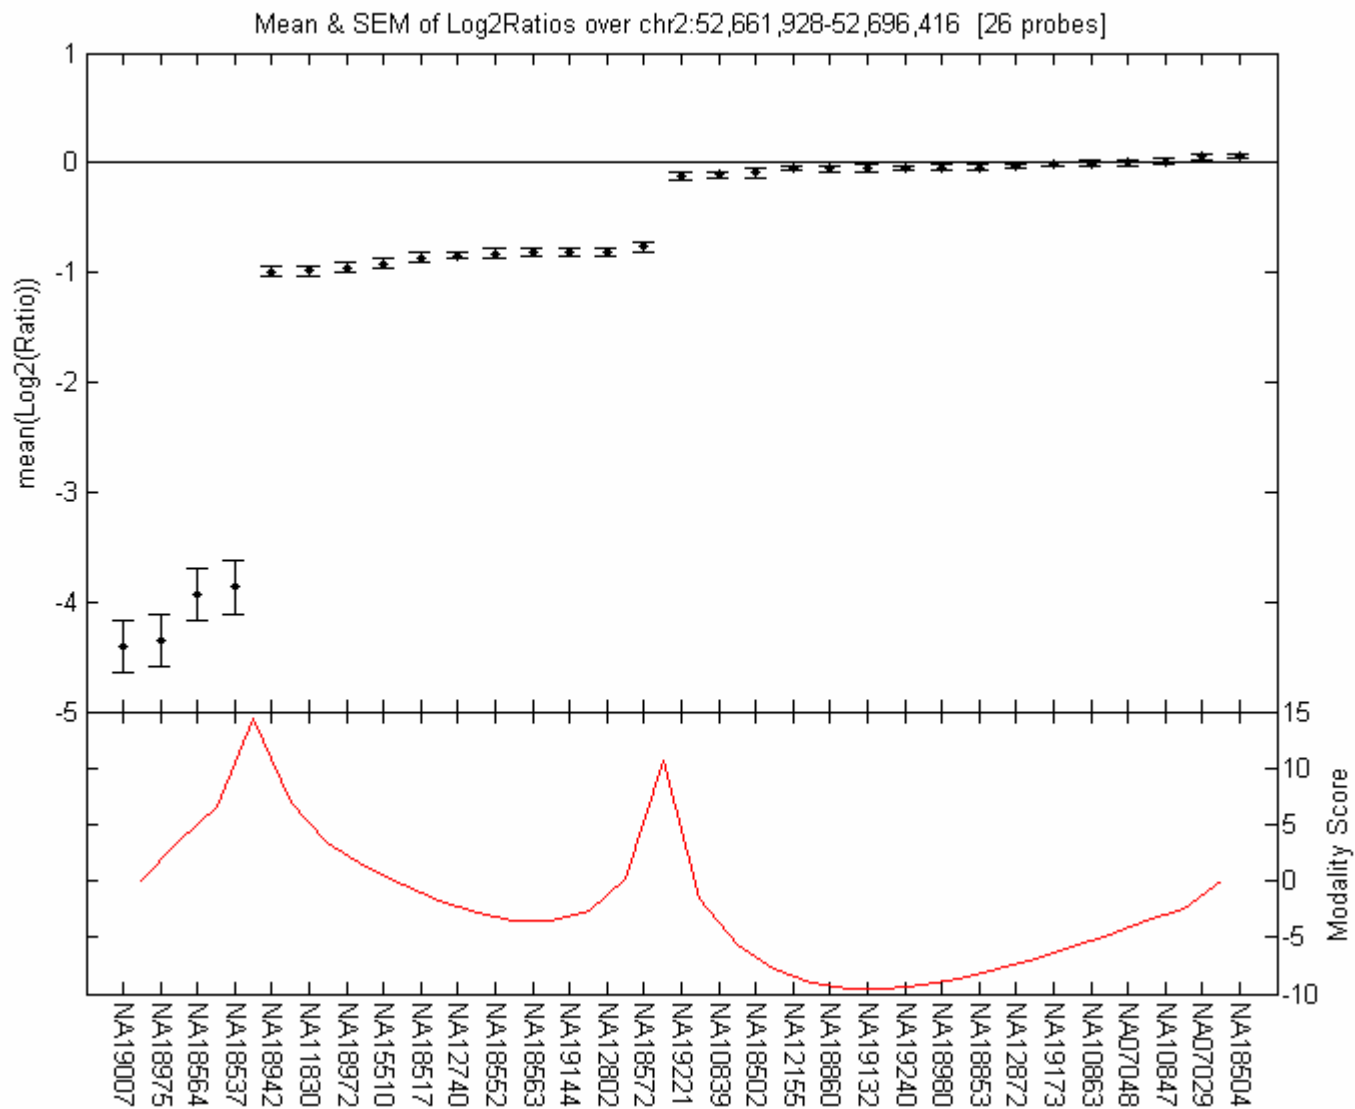

chr2:56,566,577-56,567,035 Score=11.3155

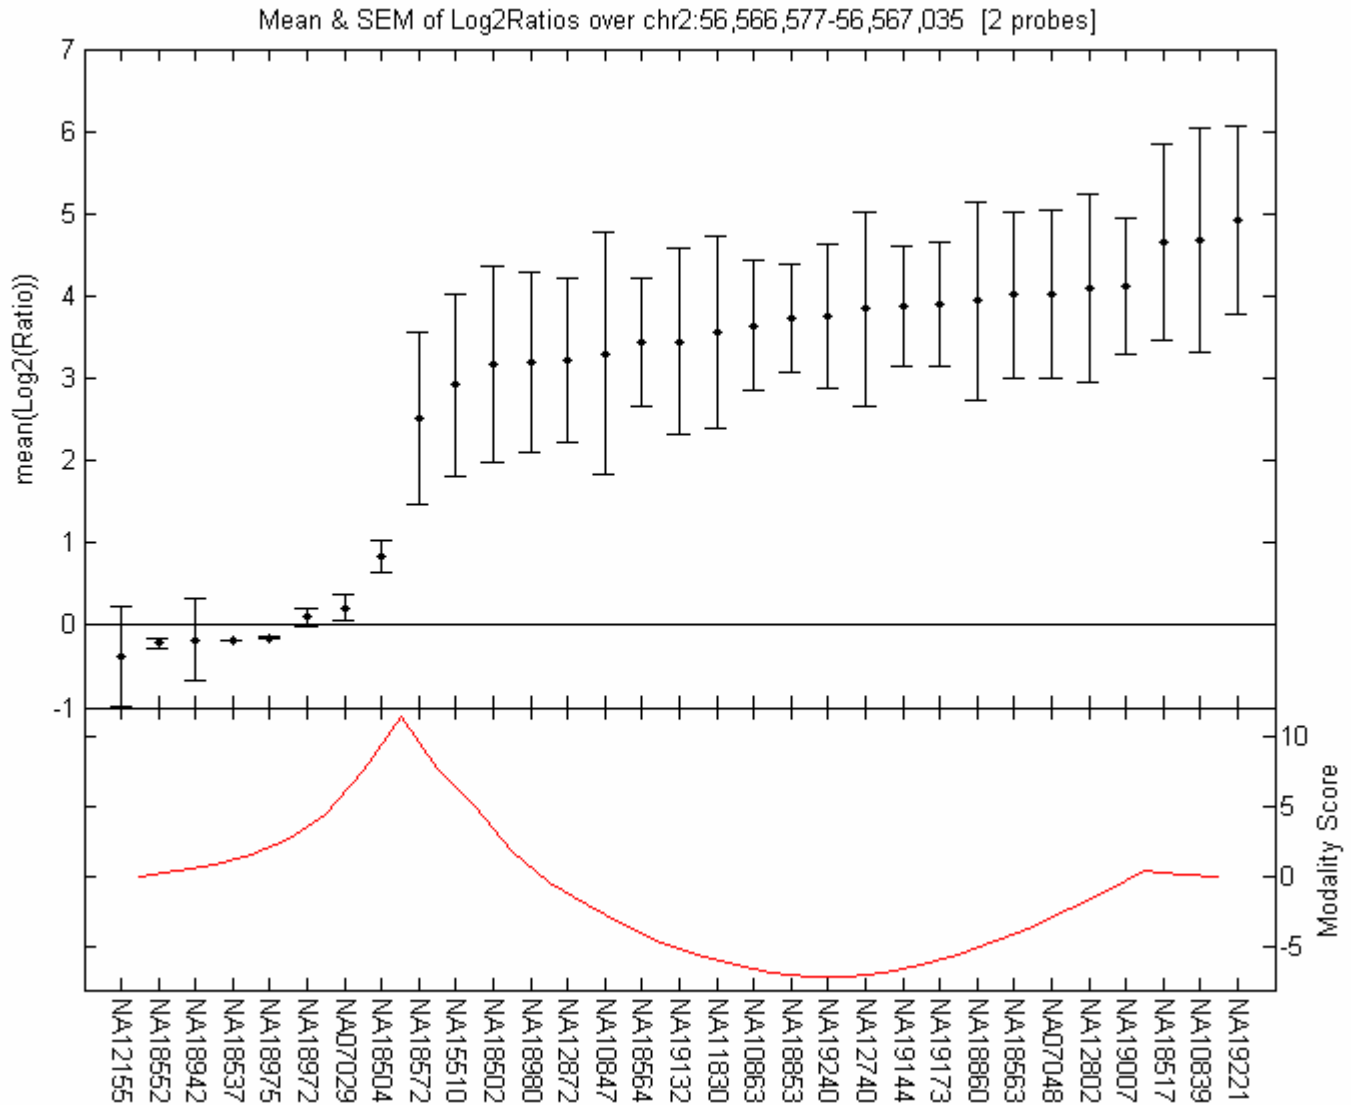

chr2:66,417,284-66,419,065 Score=20.6247

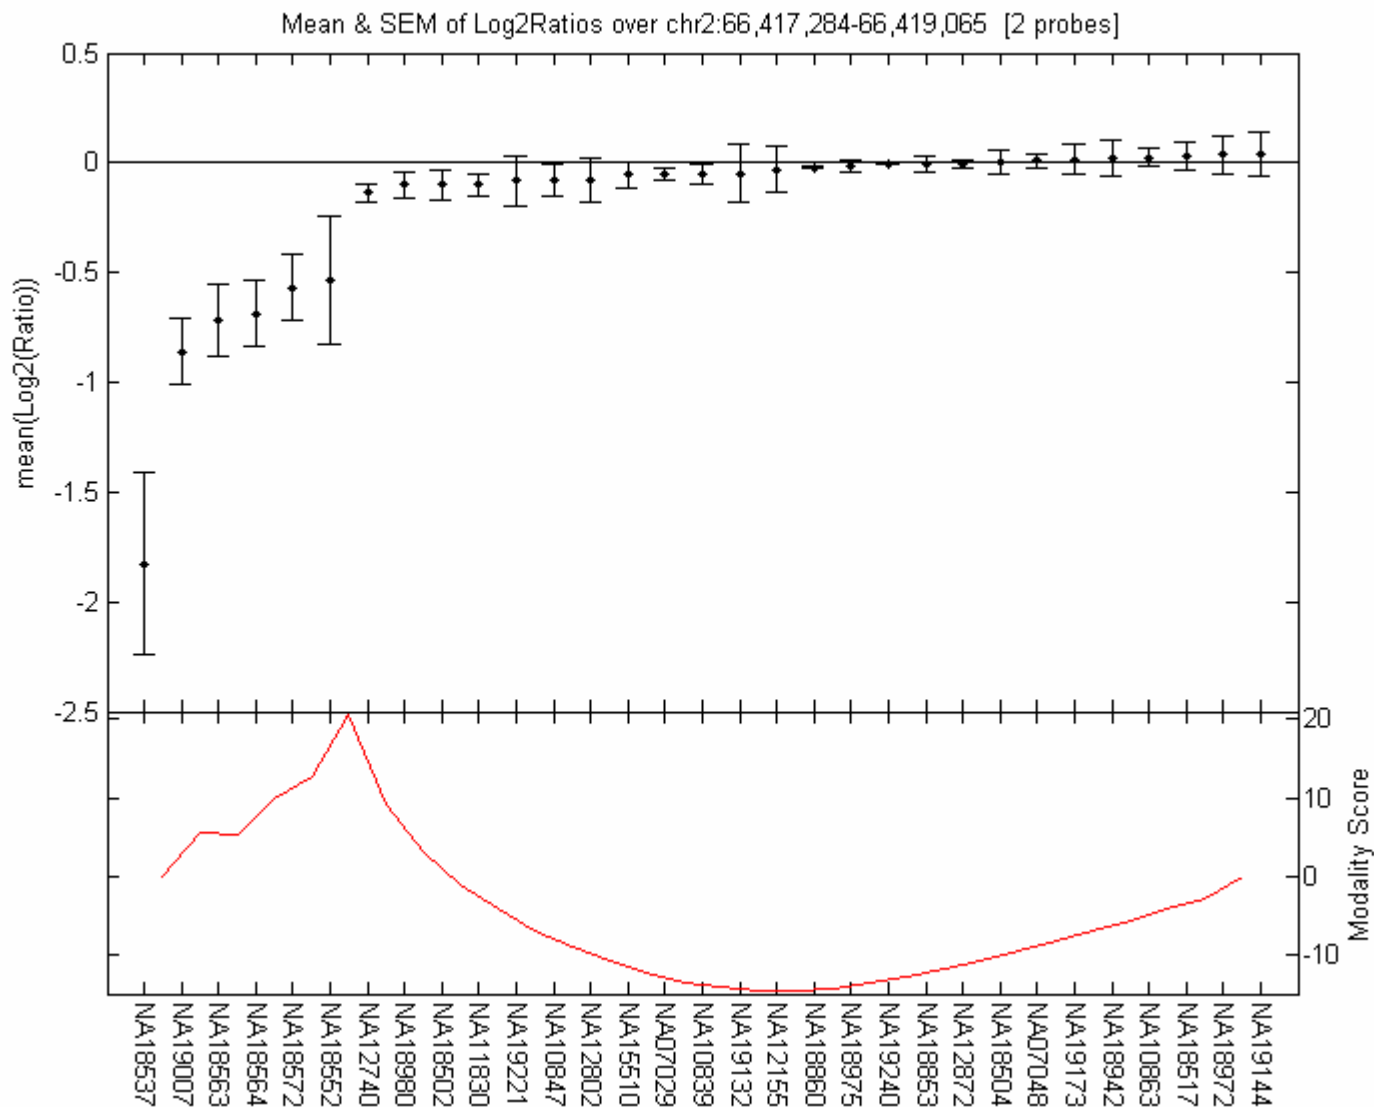



chr2:67,236,600-67,240,226 Score=12.0049

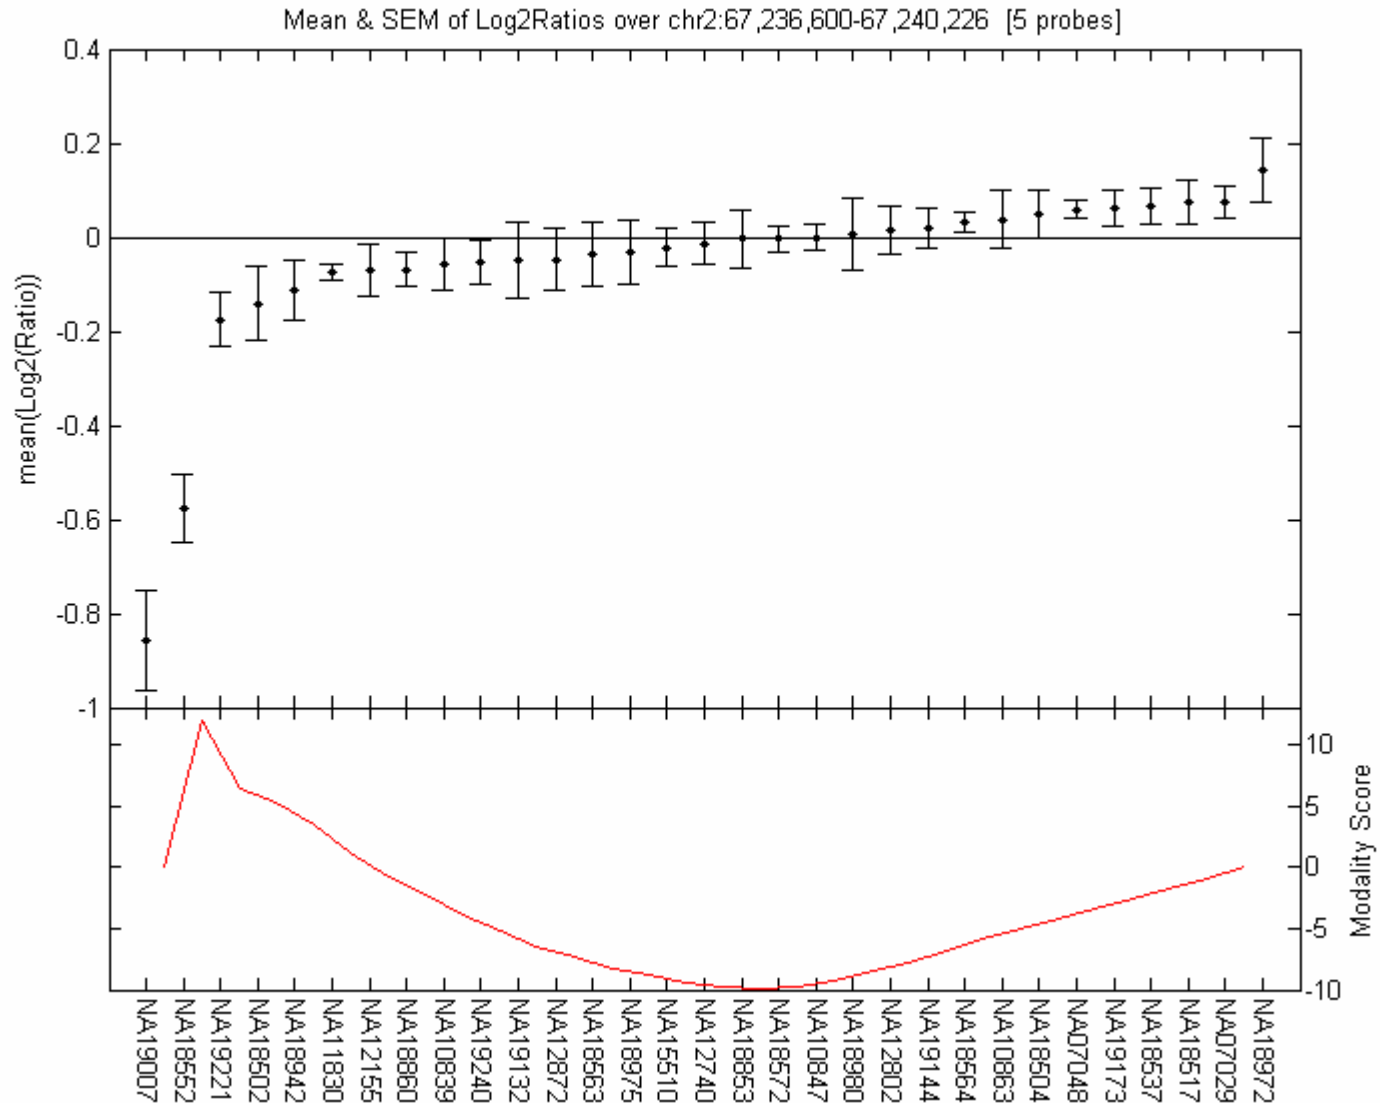

chr2:71,254,472-71,259,334 Score=20.8823

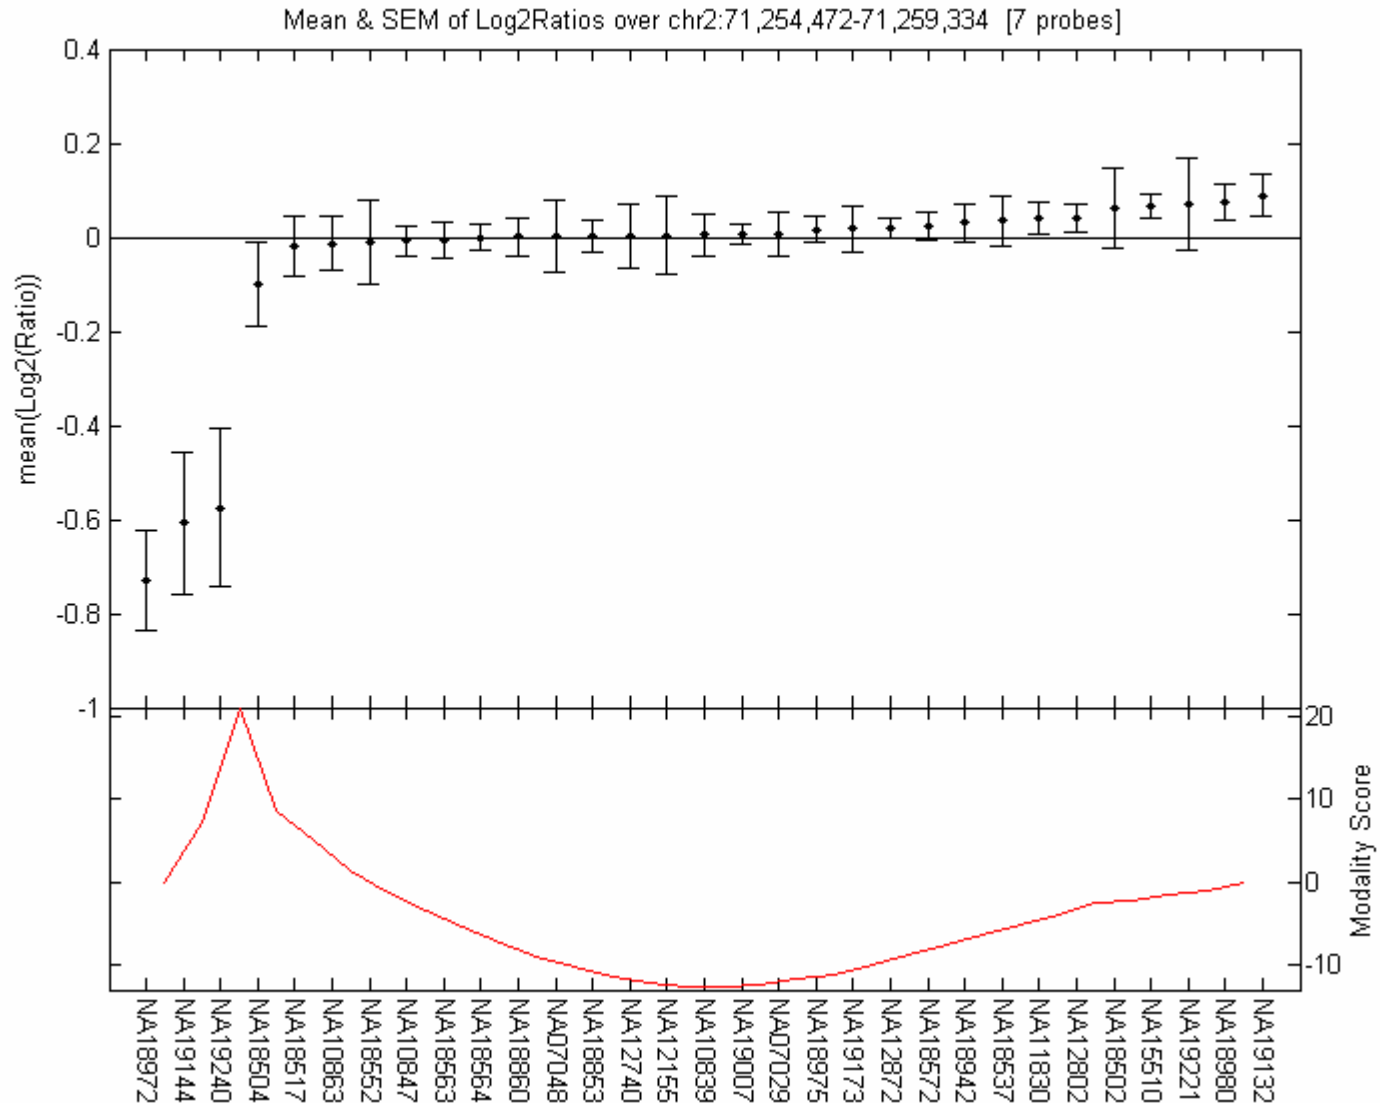

chr2:107,476,621-107,477,239 Score=19.7047

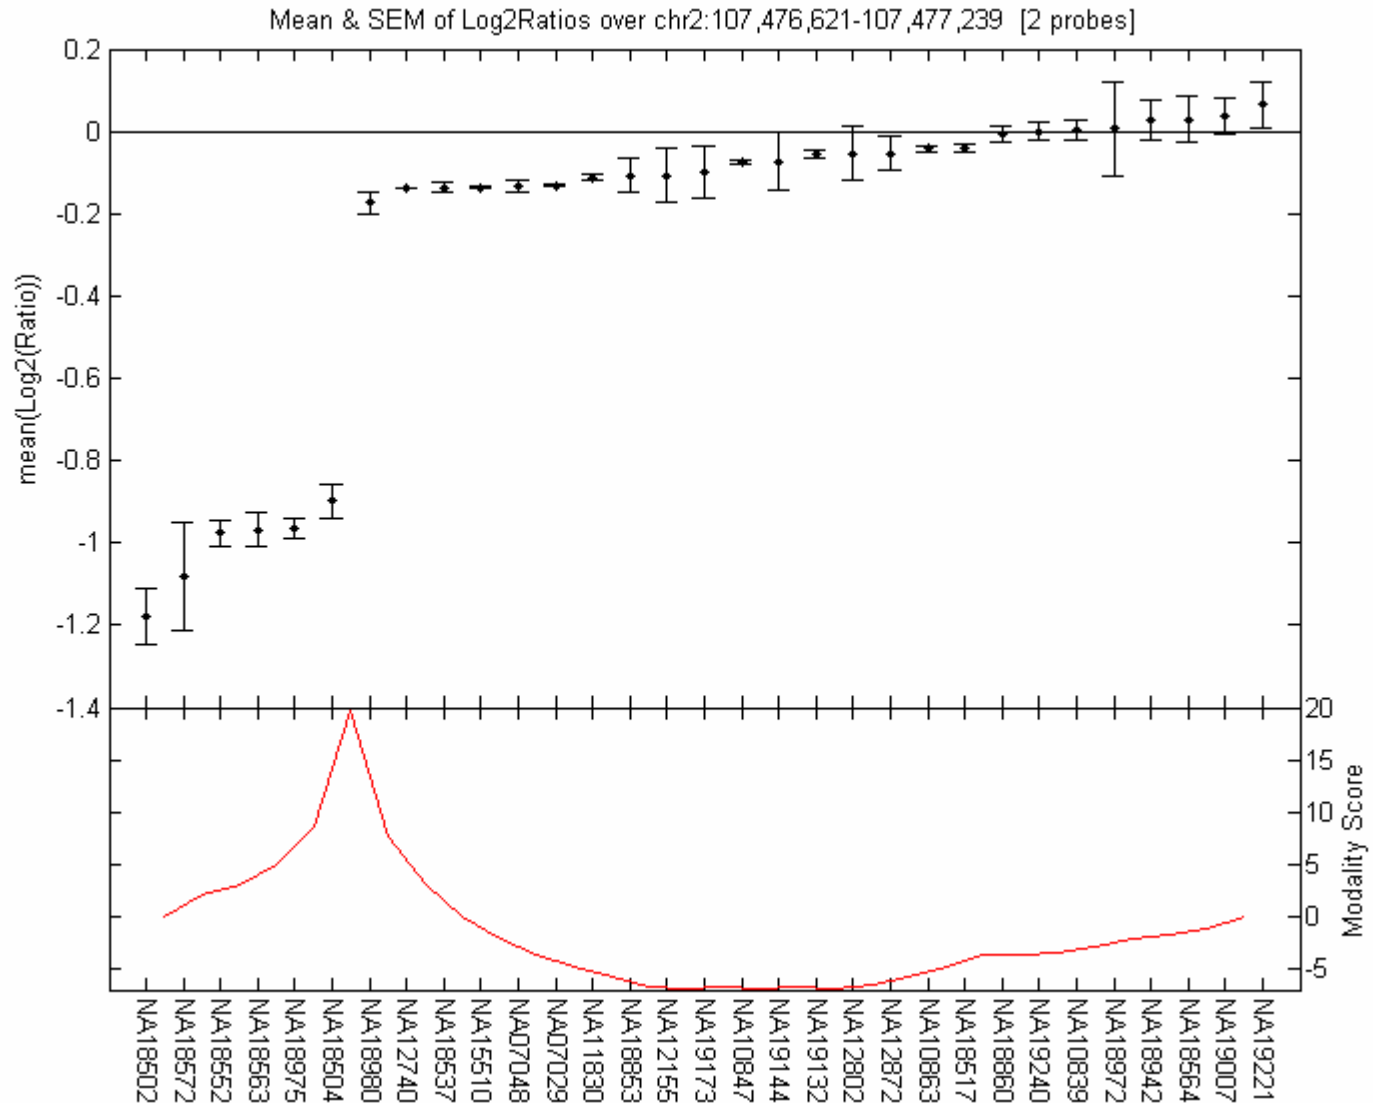

chr2:108,314,272-108,314,680 Score=15.5482

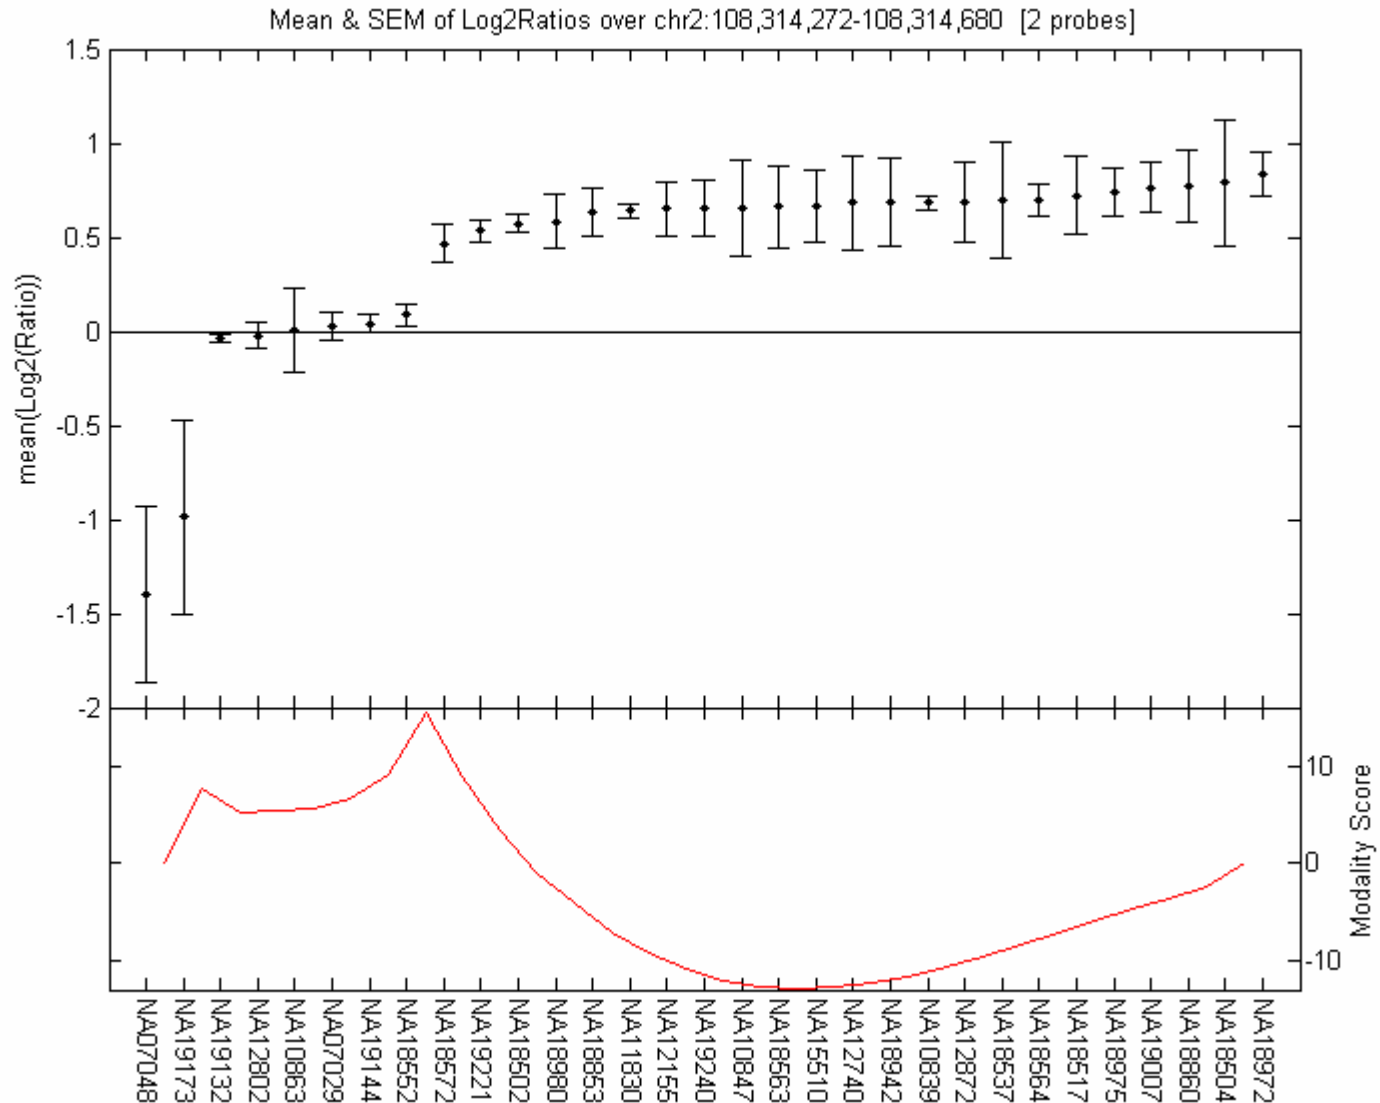

chr2:123,193,121-123,198,757 Score=17.1769

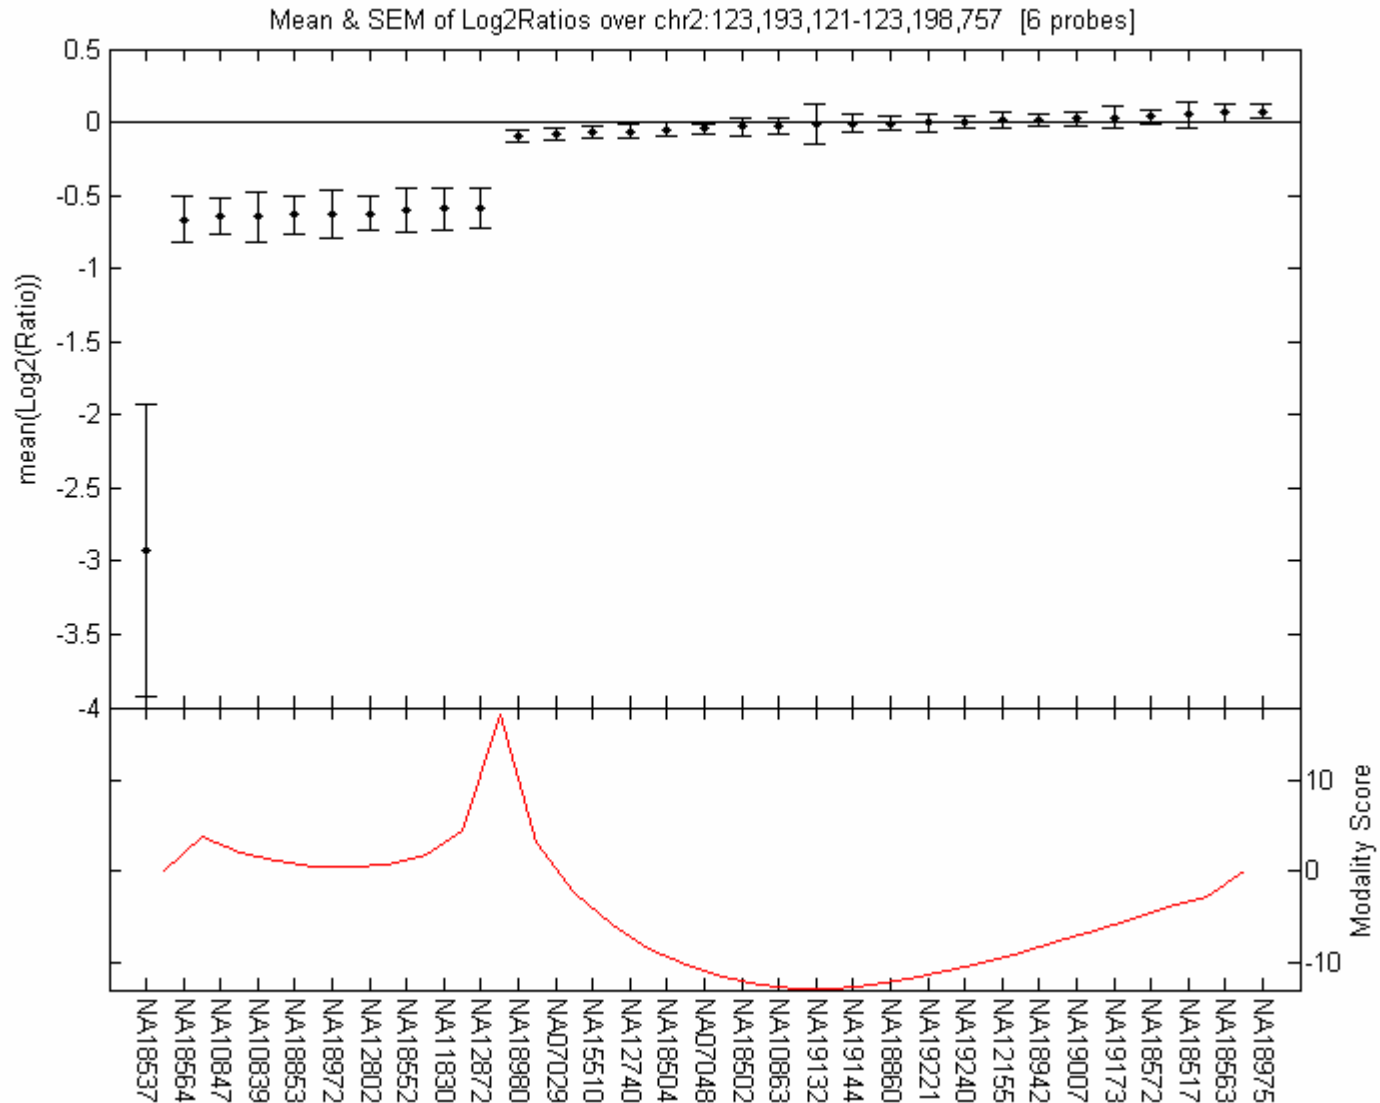

chr2:129,354,892-129,357,659 Score=13.3531

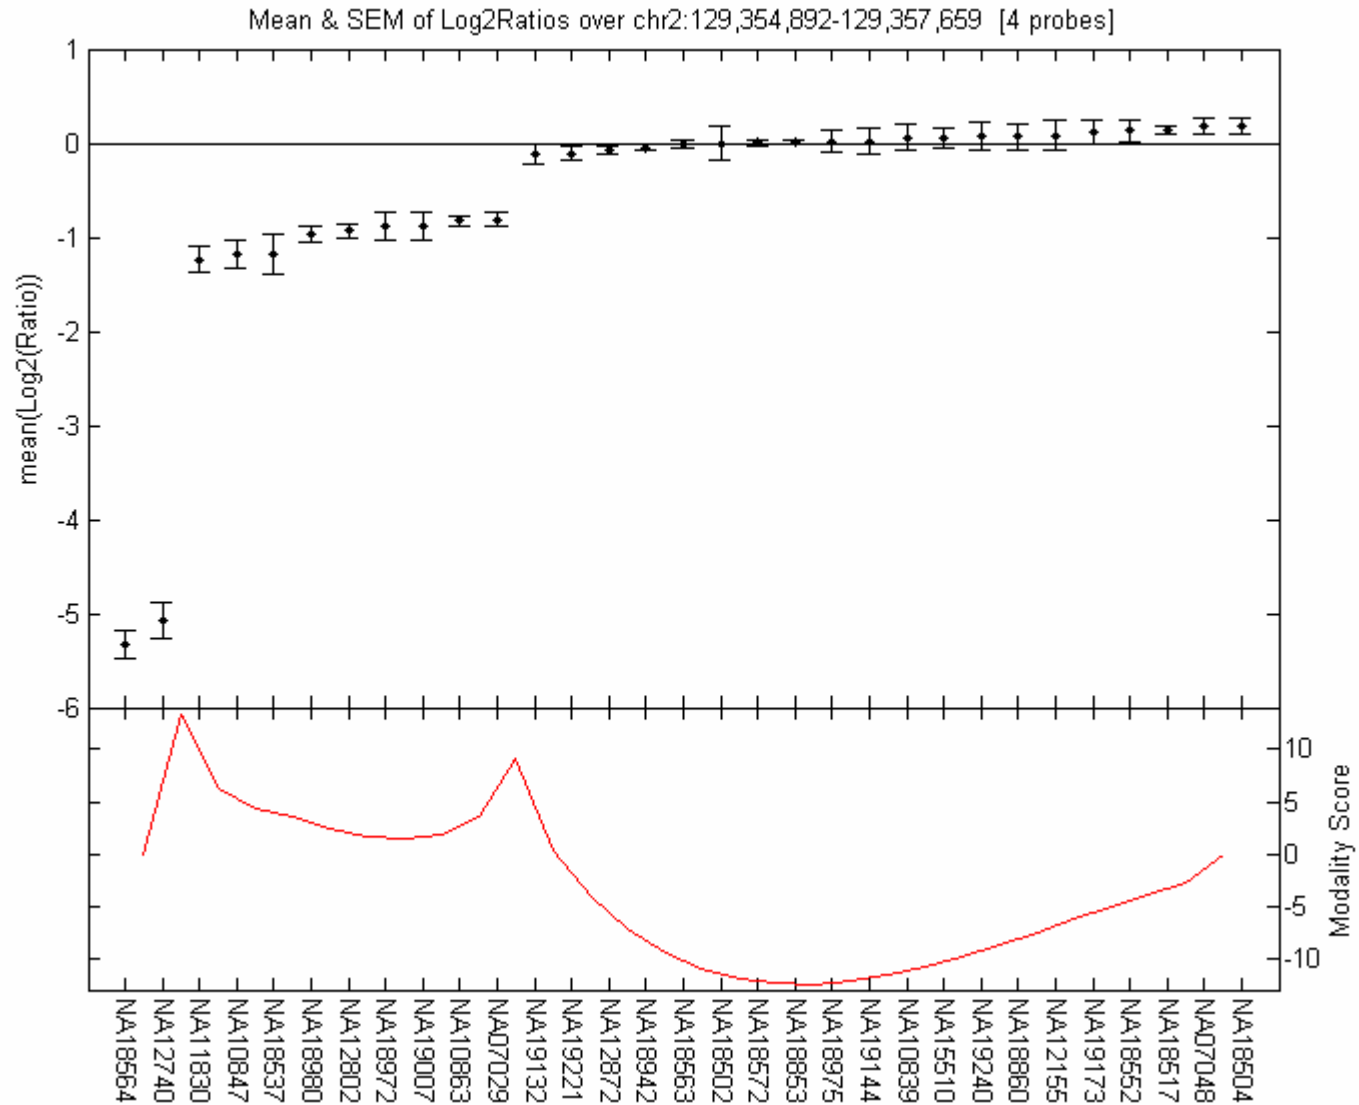

chr2:130,265,754-130,273,870 Score=11.7033

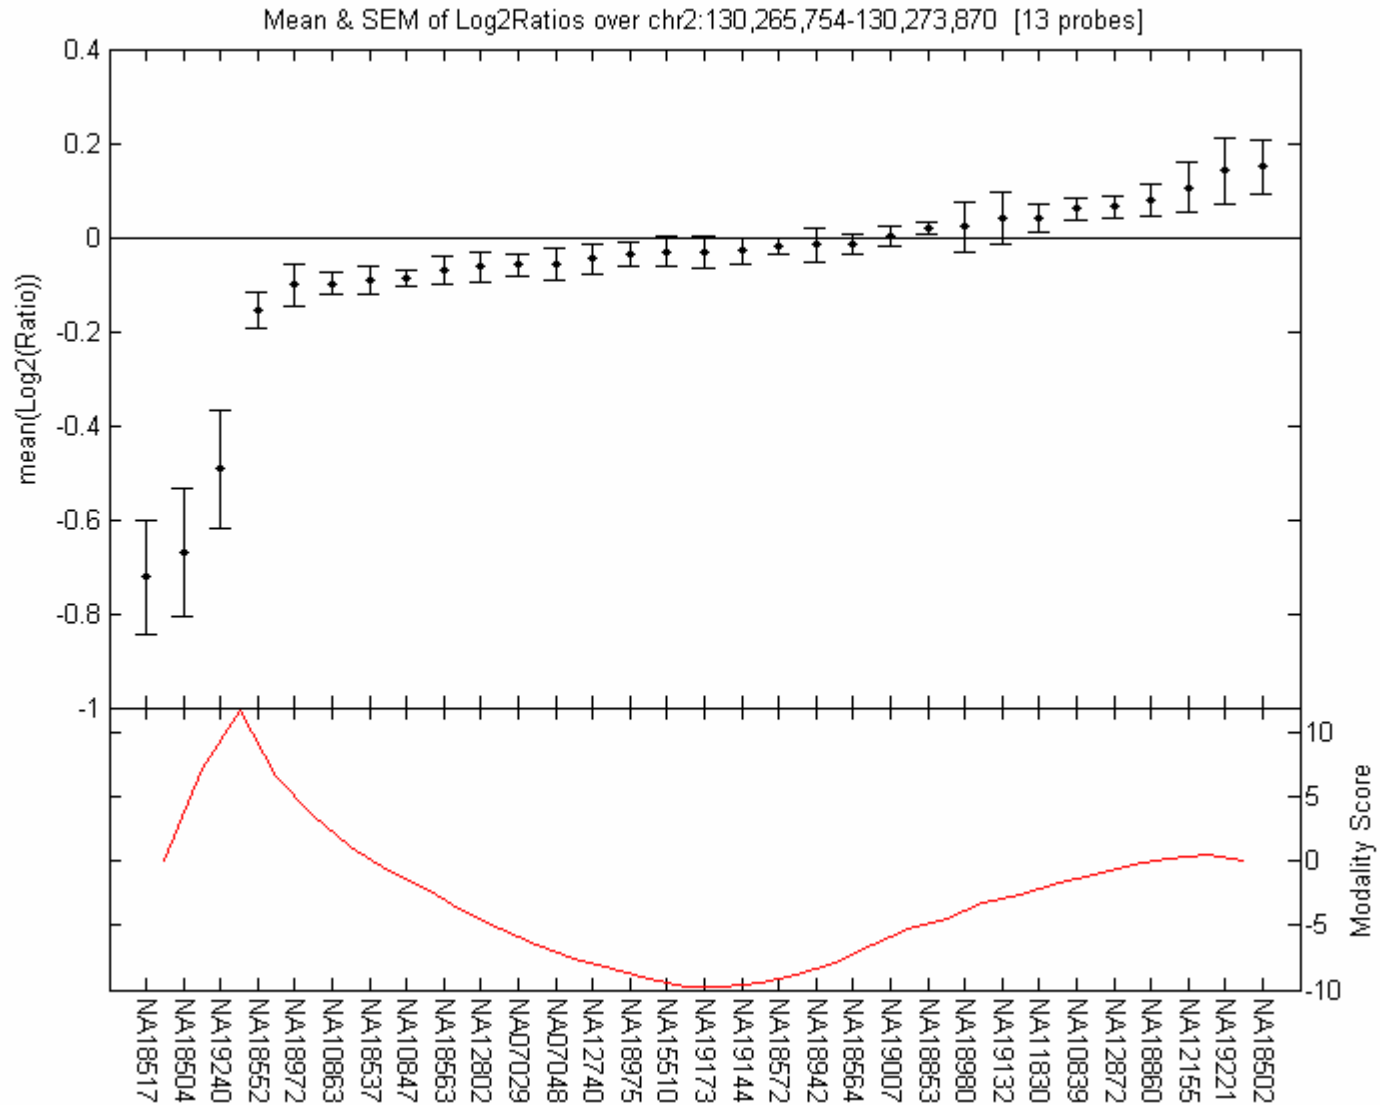

chr2:146,697,098-146,710,557 Score=14.9163

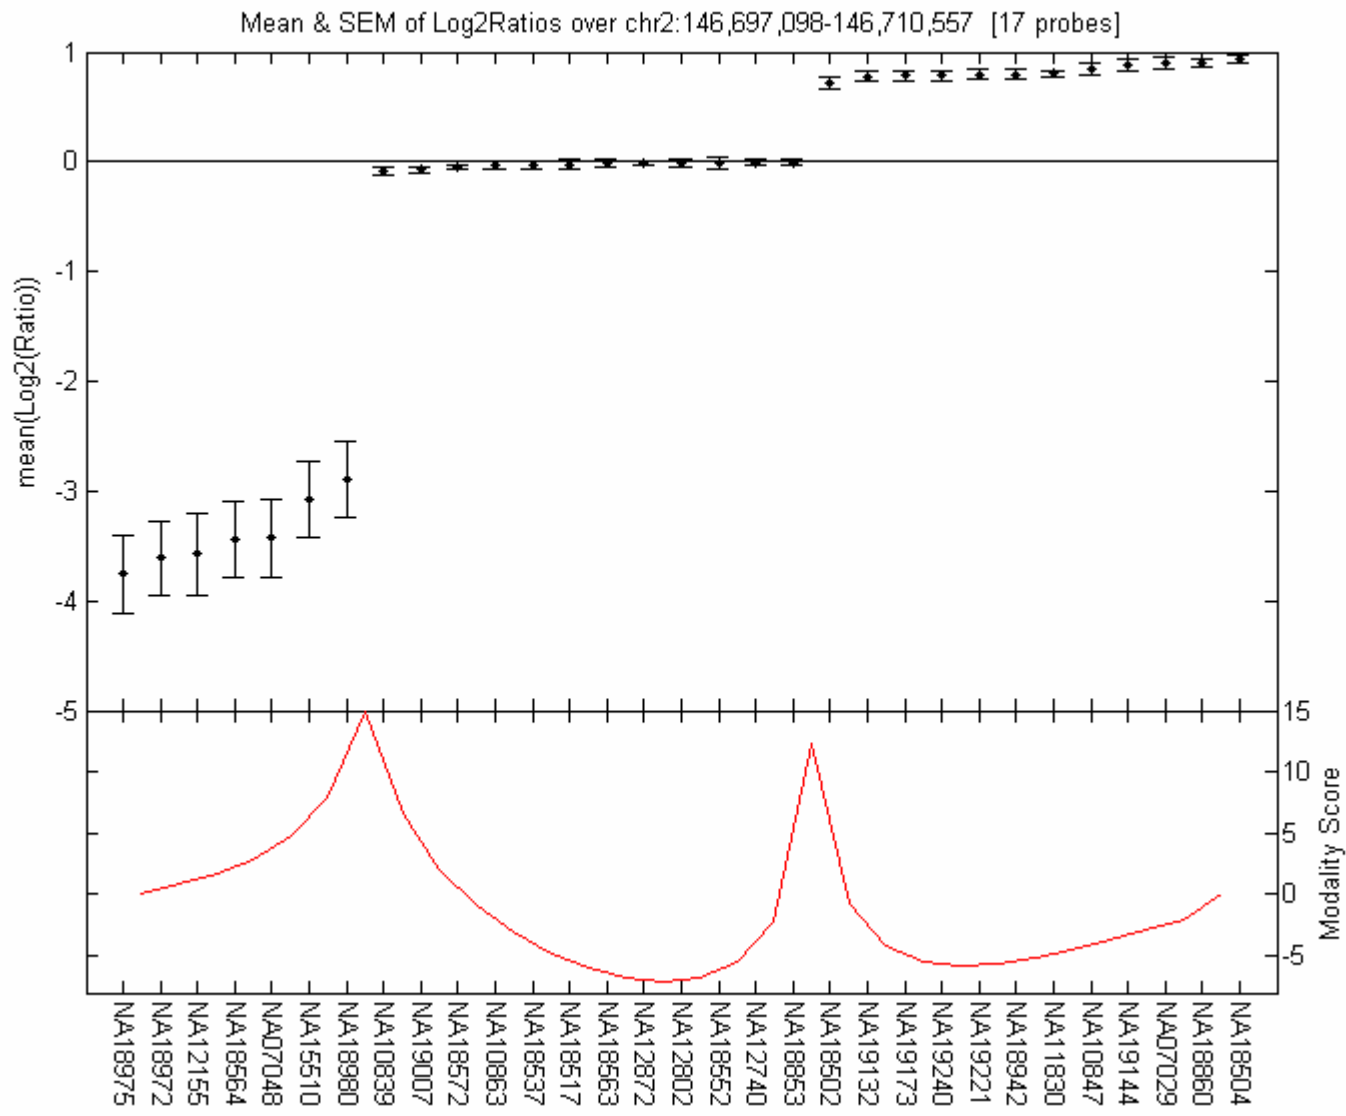



chr2:153,624,247-153,625,088 Score=19.204

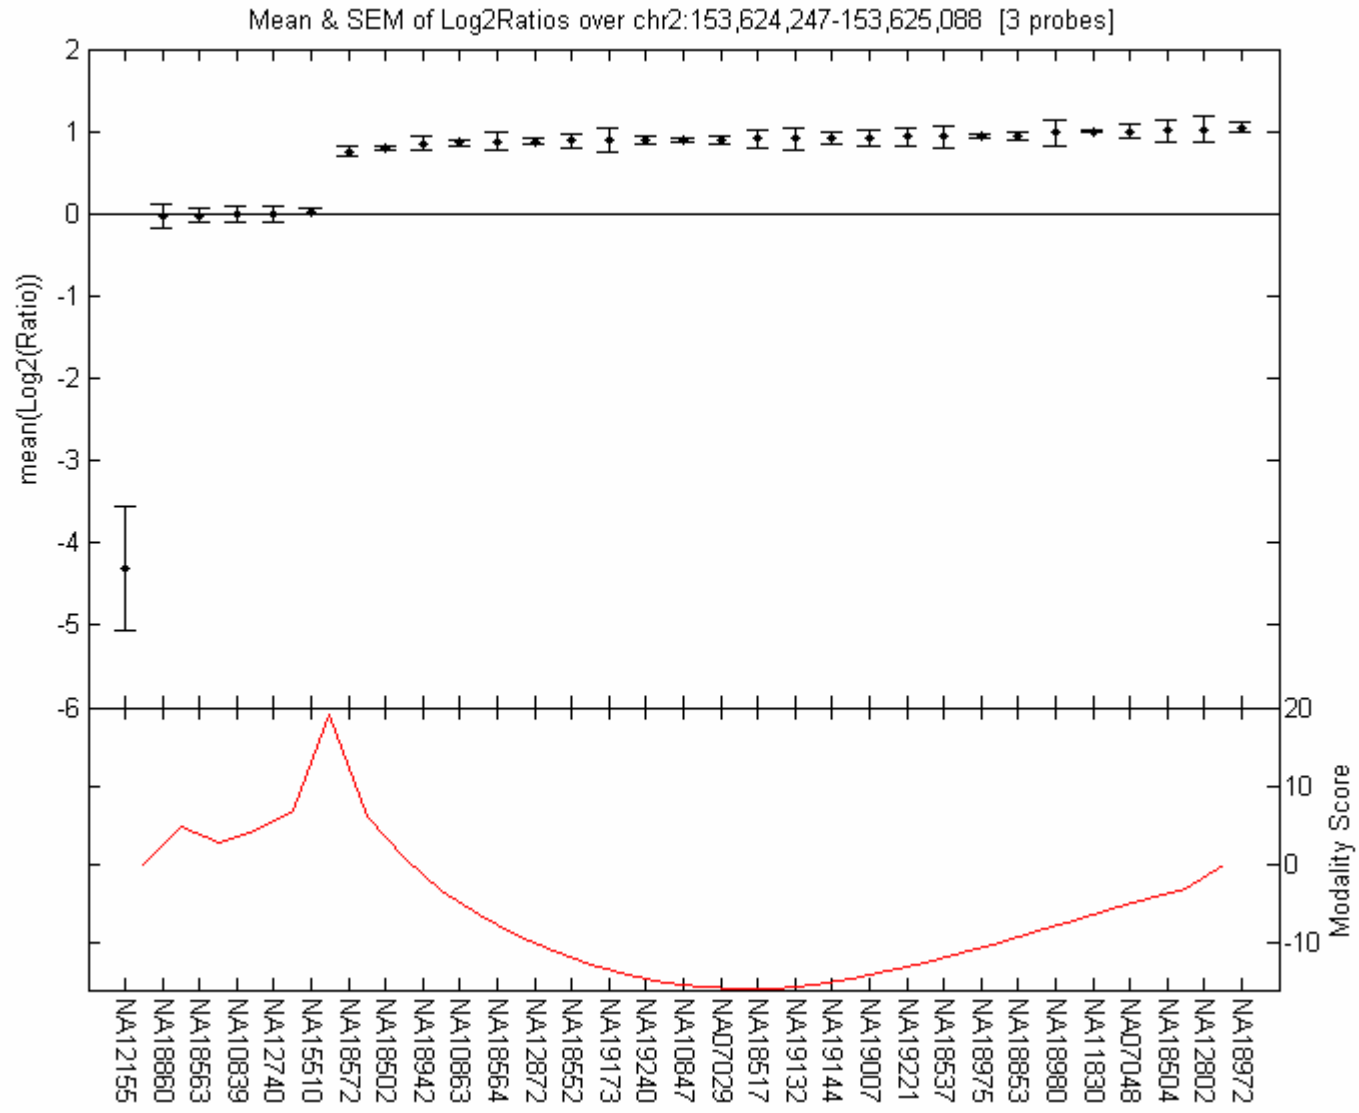

chr2:180,238,560-180,248,568 Score=21.6628

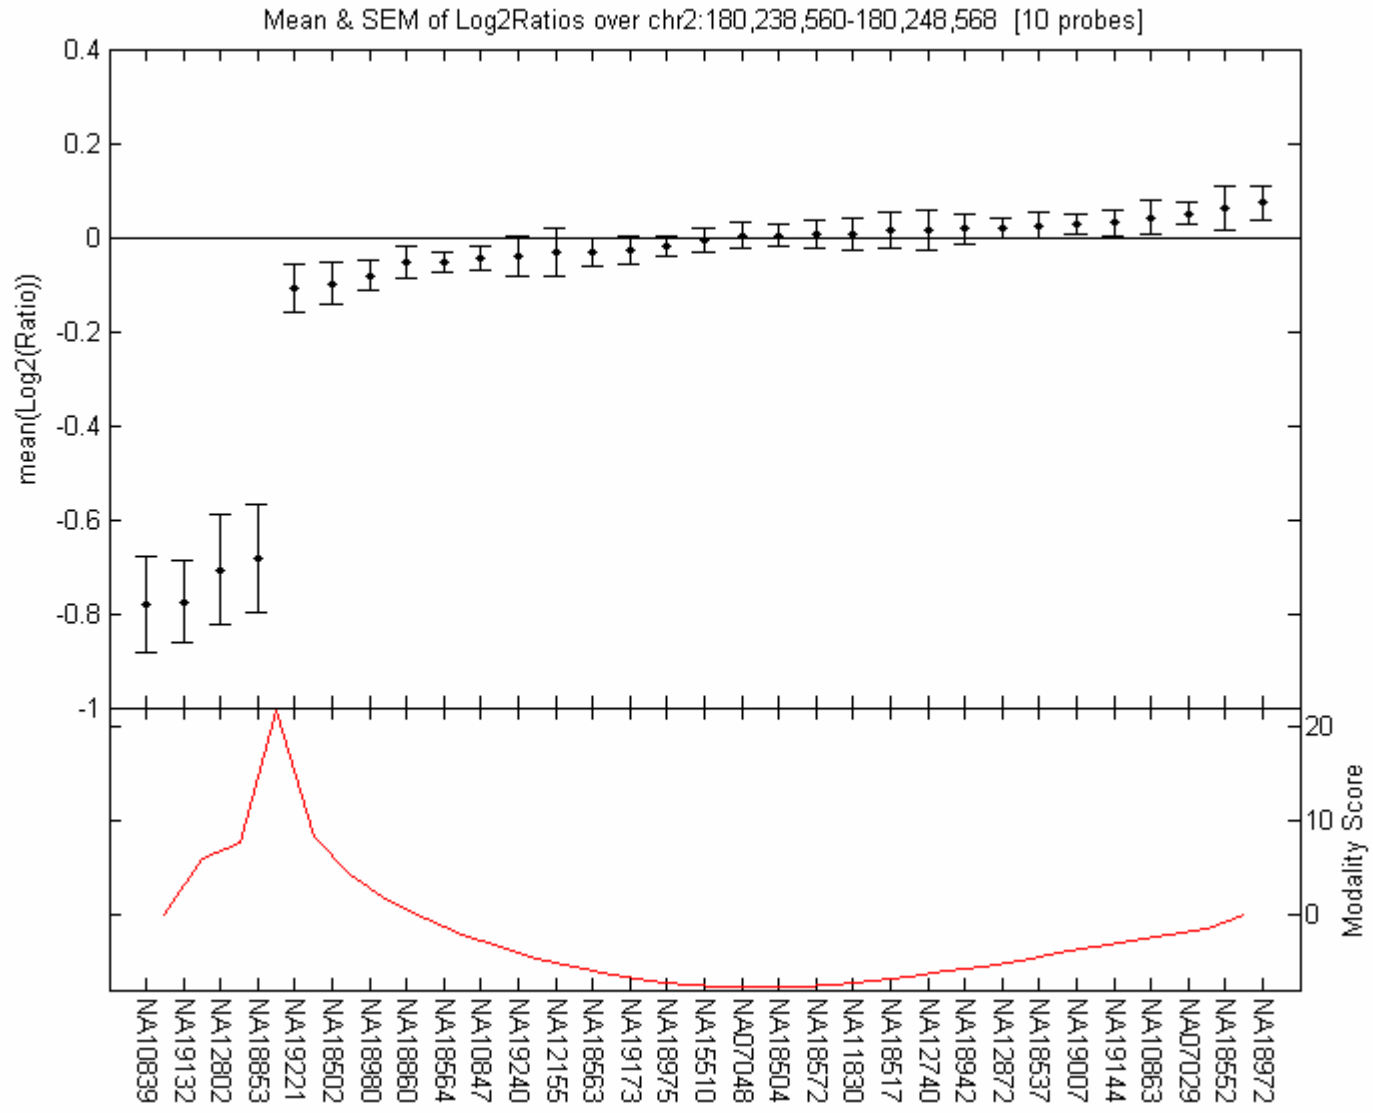

chr2:189,395,553-189,403,901 Score=23.5989

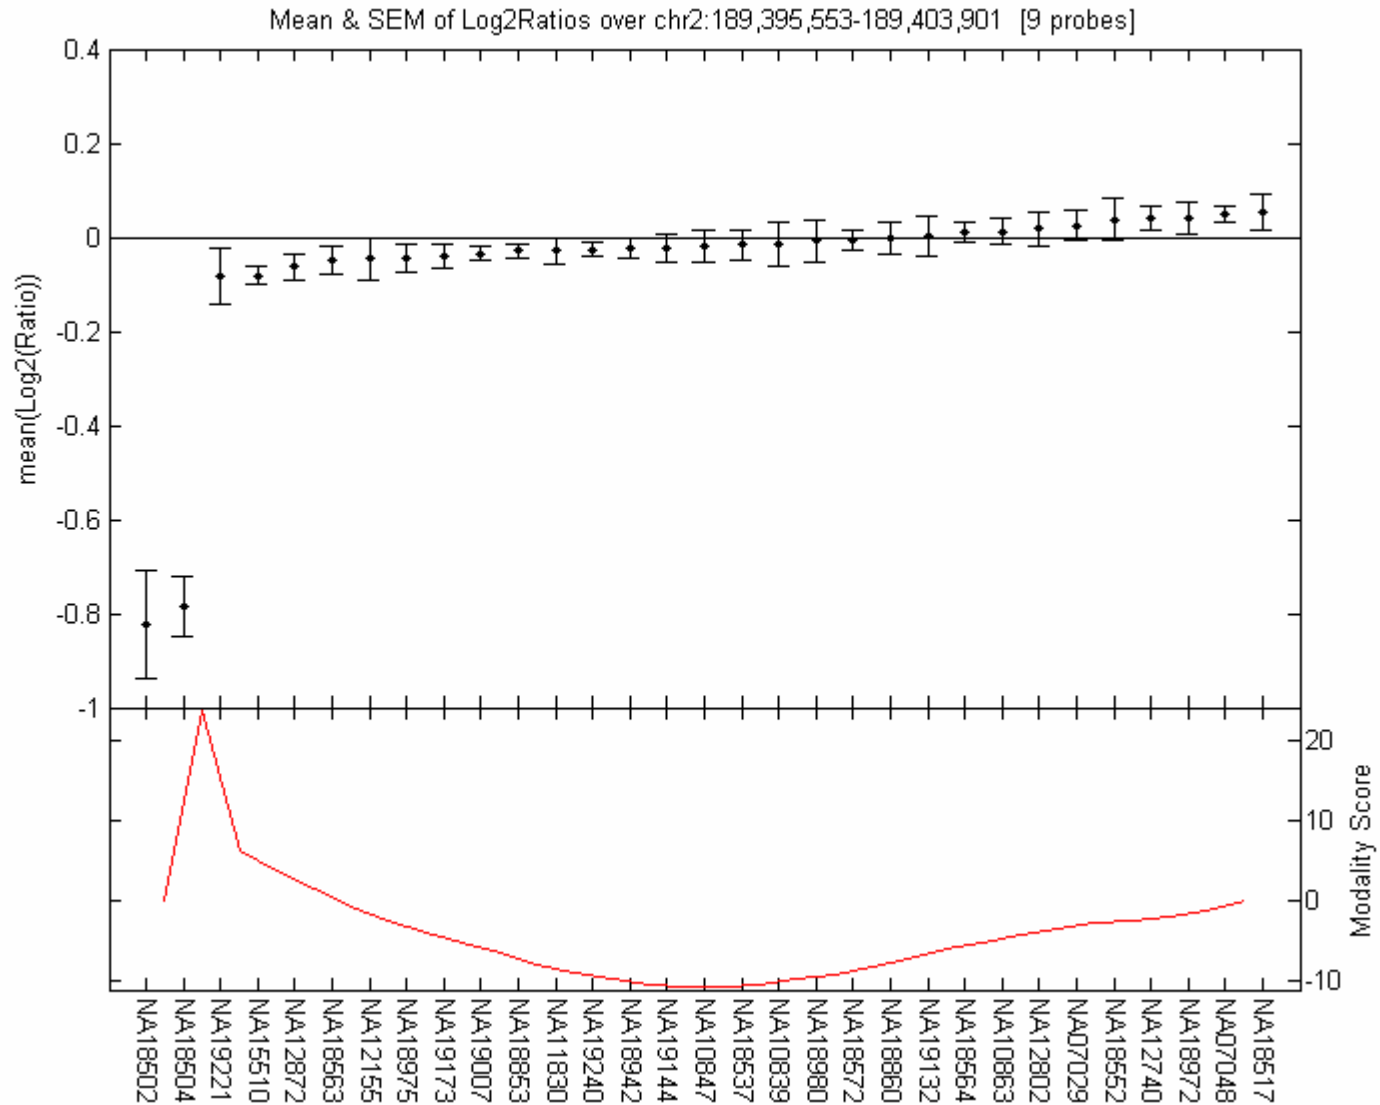

chr2:195,806,354-195,809,355 Score=14.5433

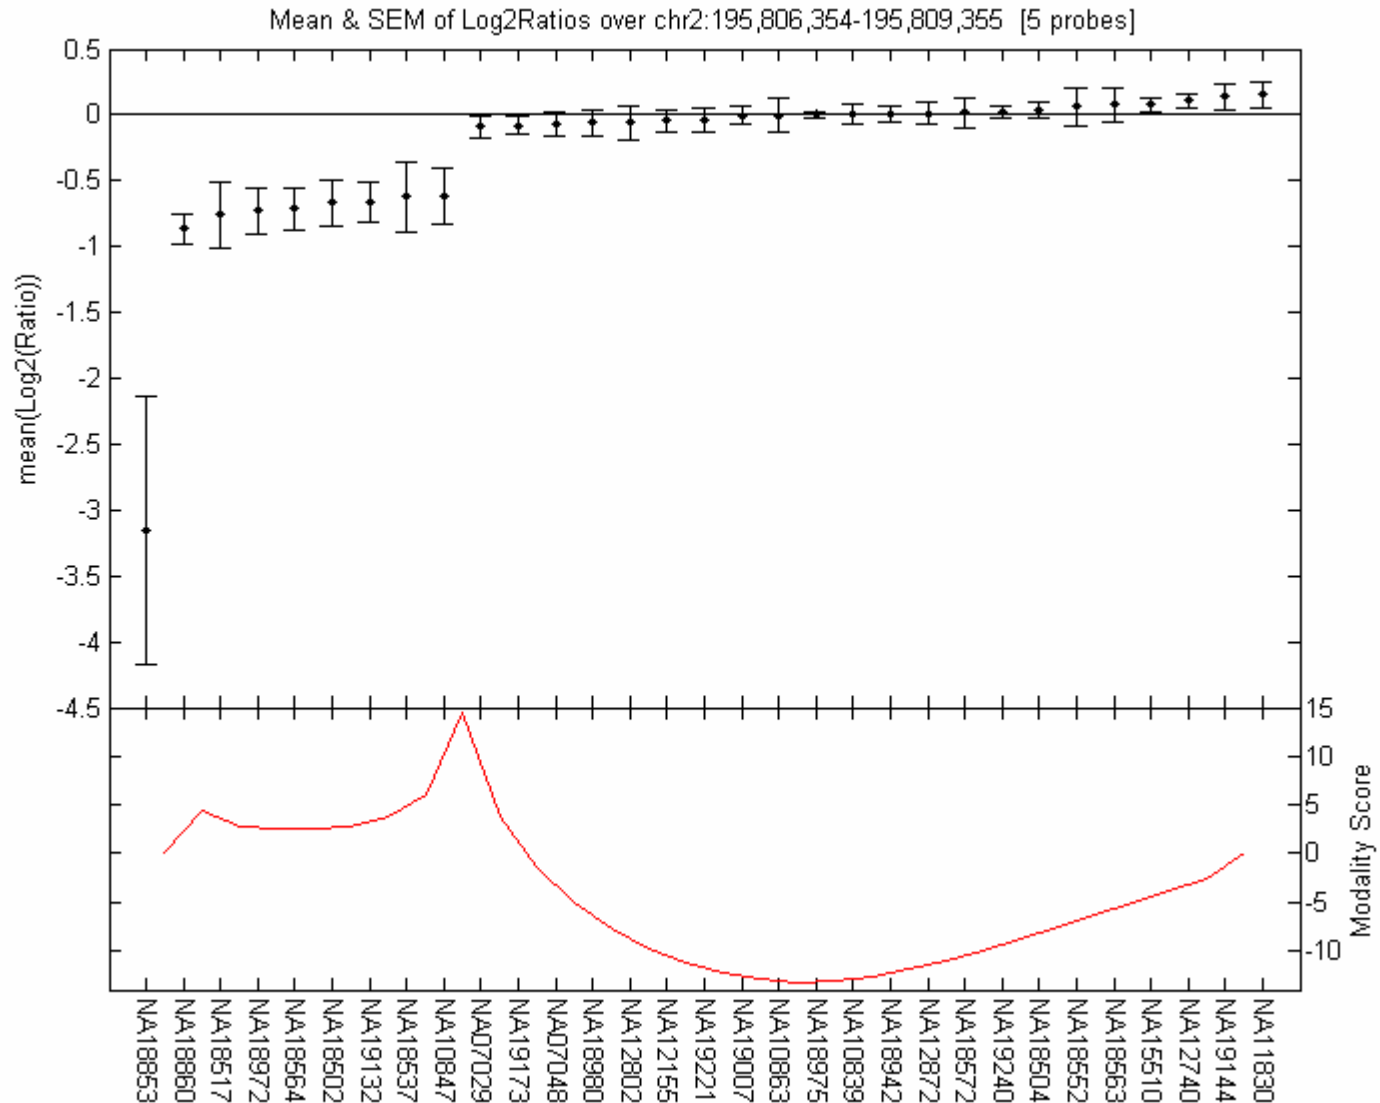

chr2:203,121,389-203,138,142 Score=17.751

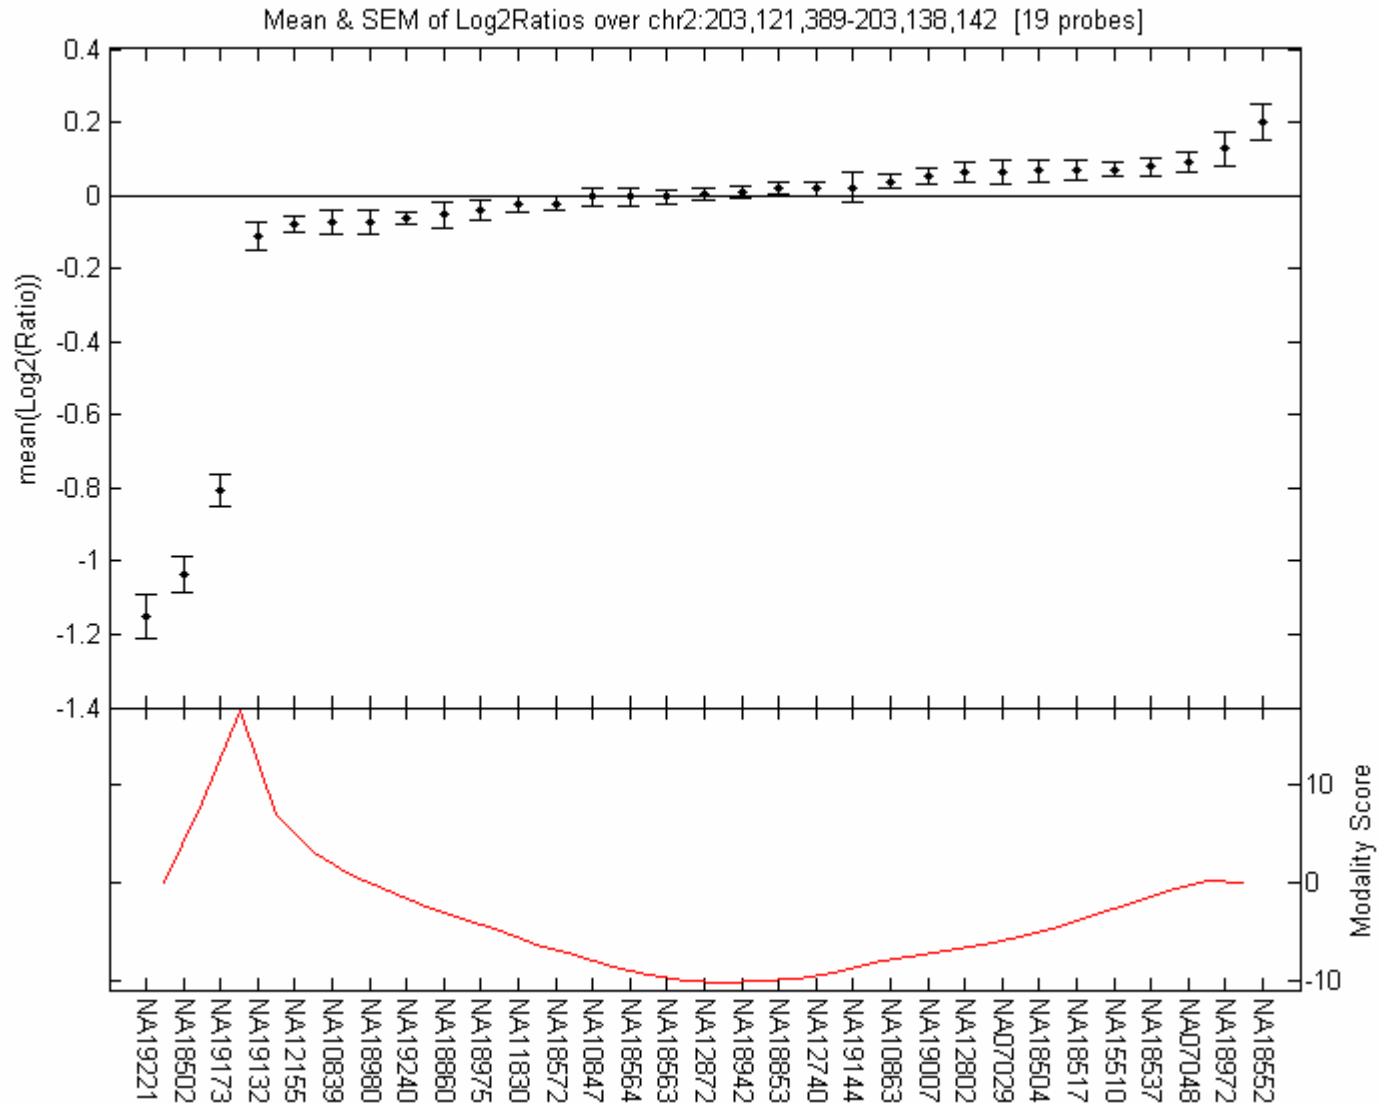

chr2:208,176,865-208,183,930 Score=19.2684

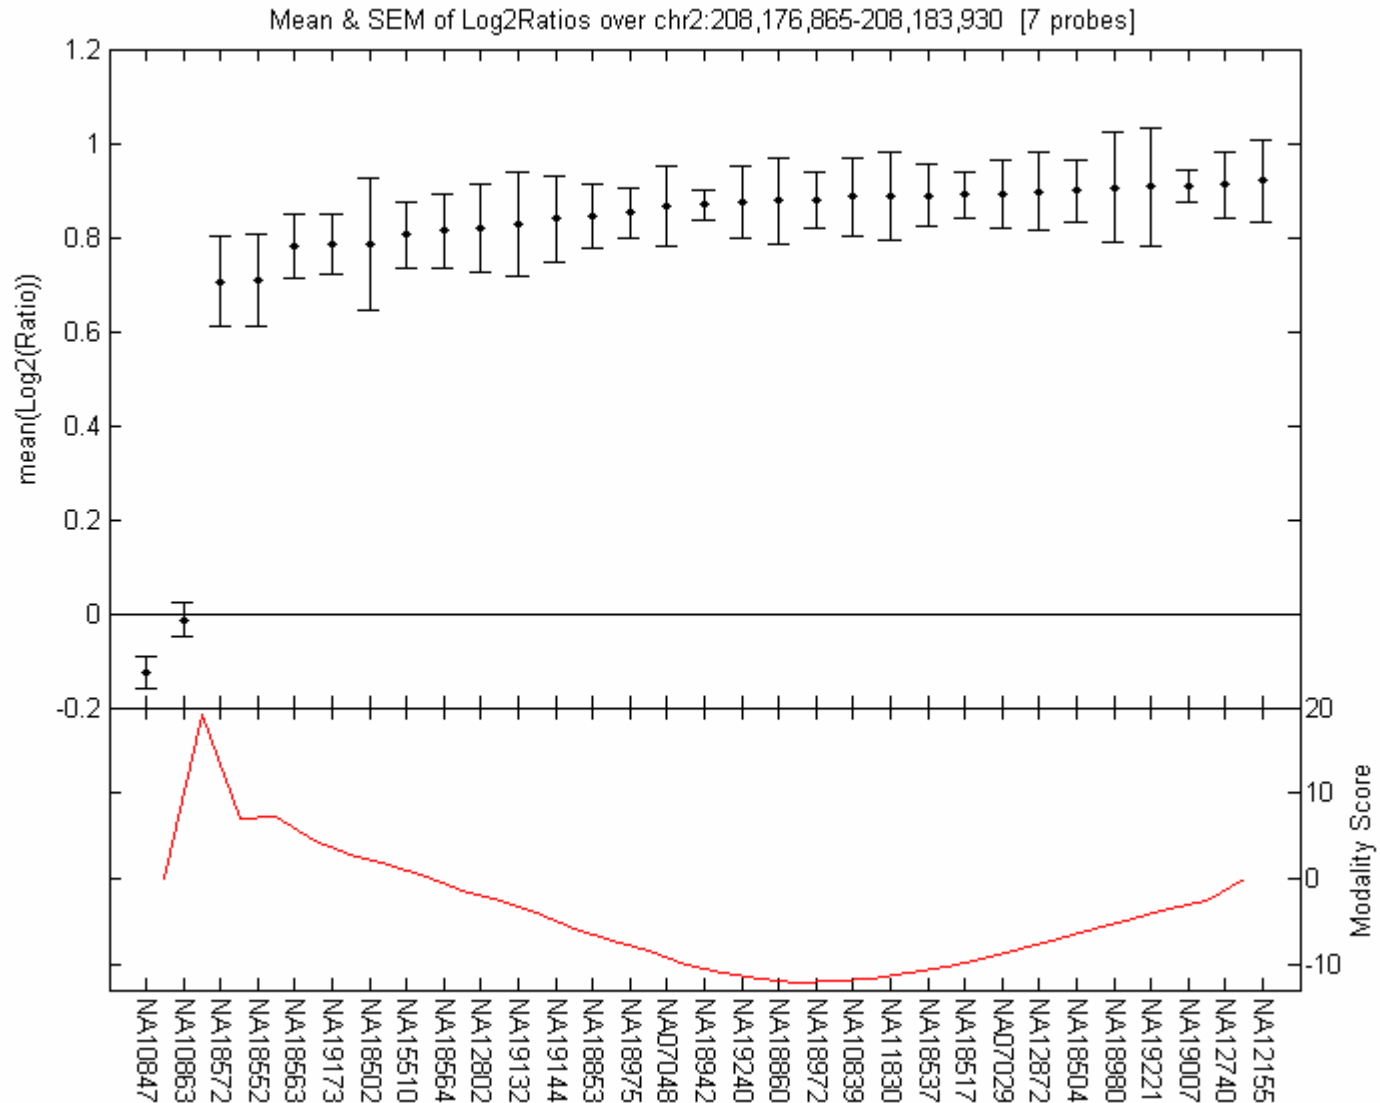

chr2:213,009,554-213,016,799 Score=23.8963

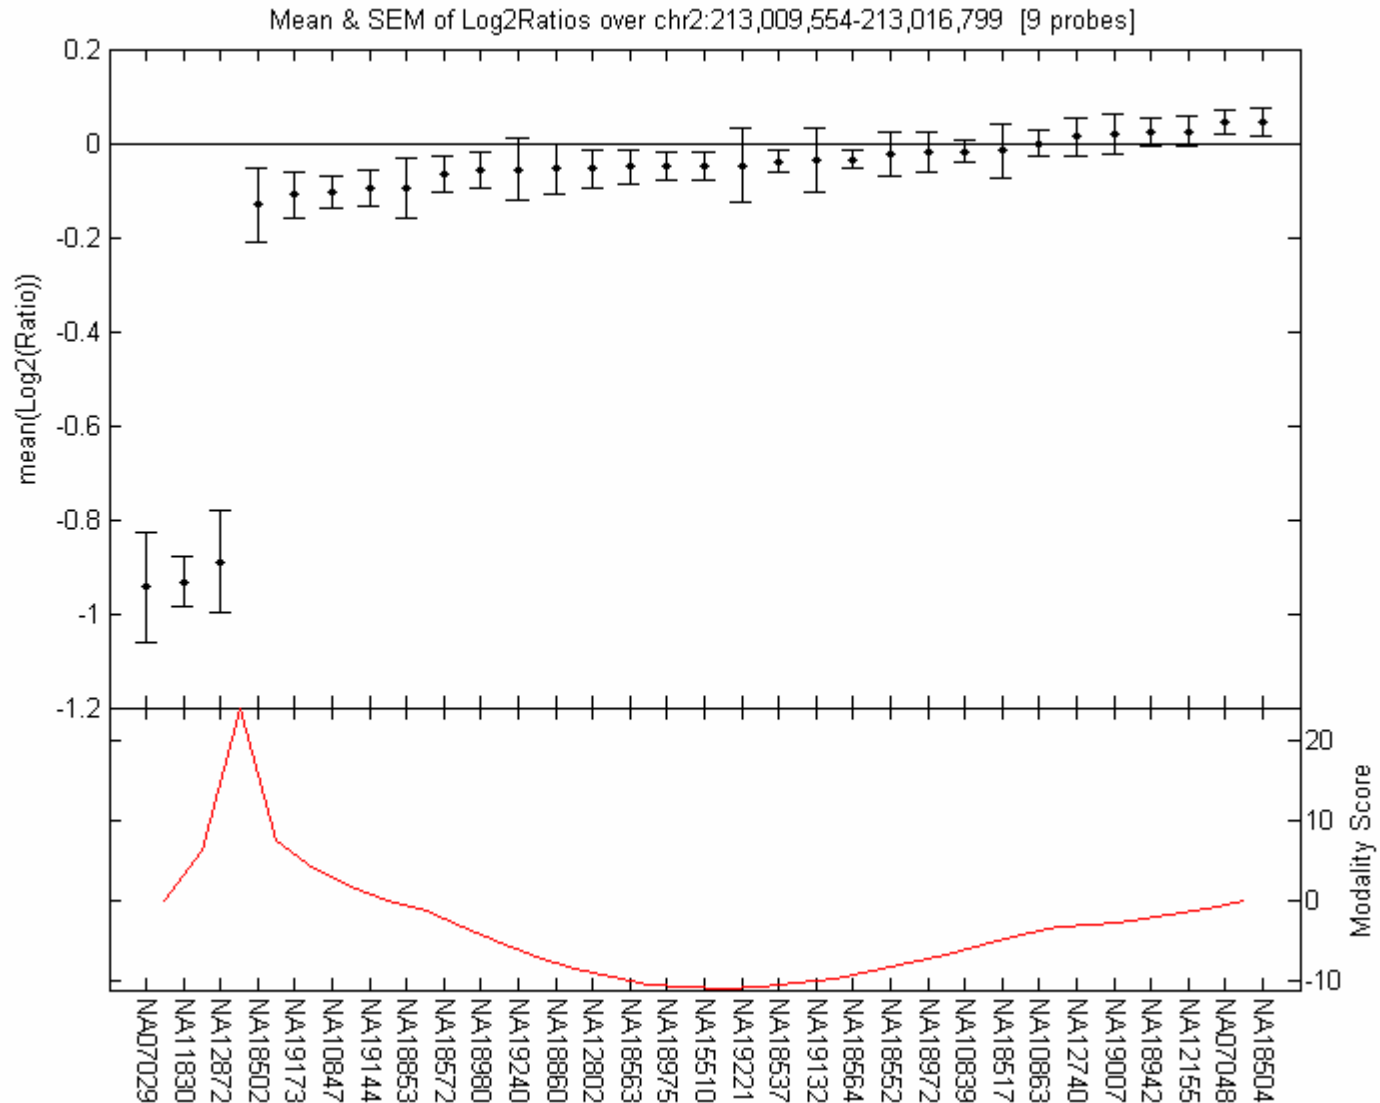

chr3:206,383-209,009 Score=8.5343

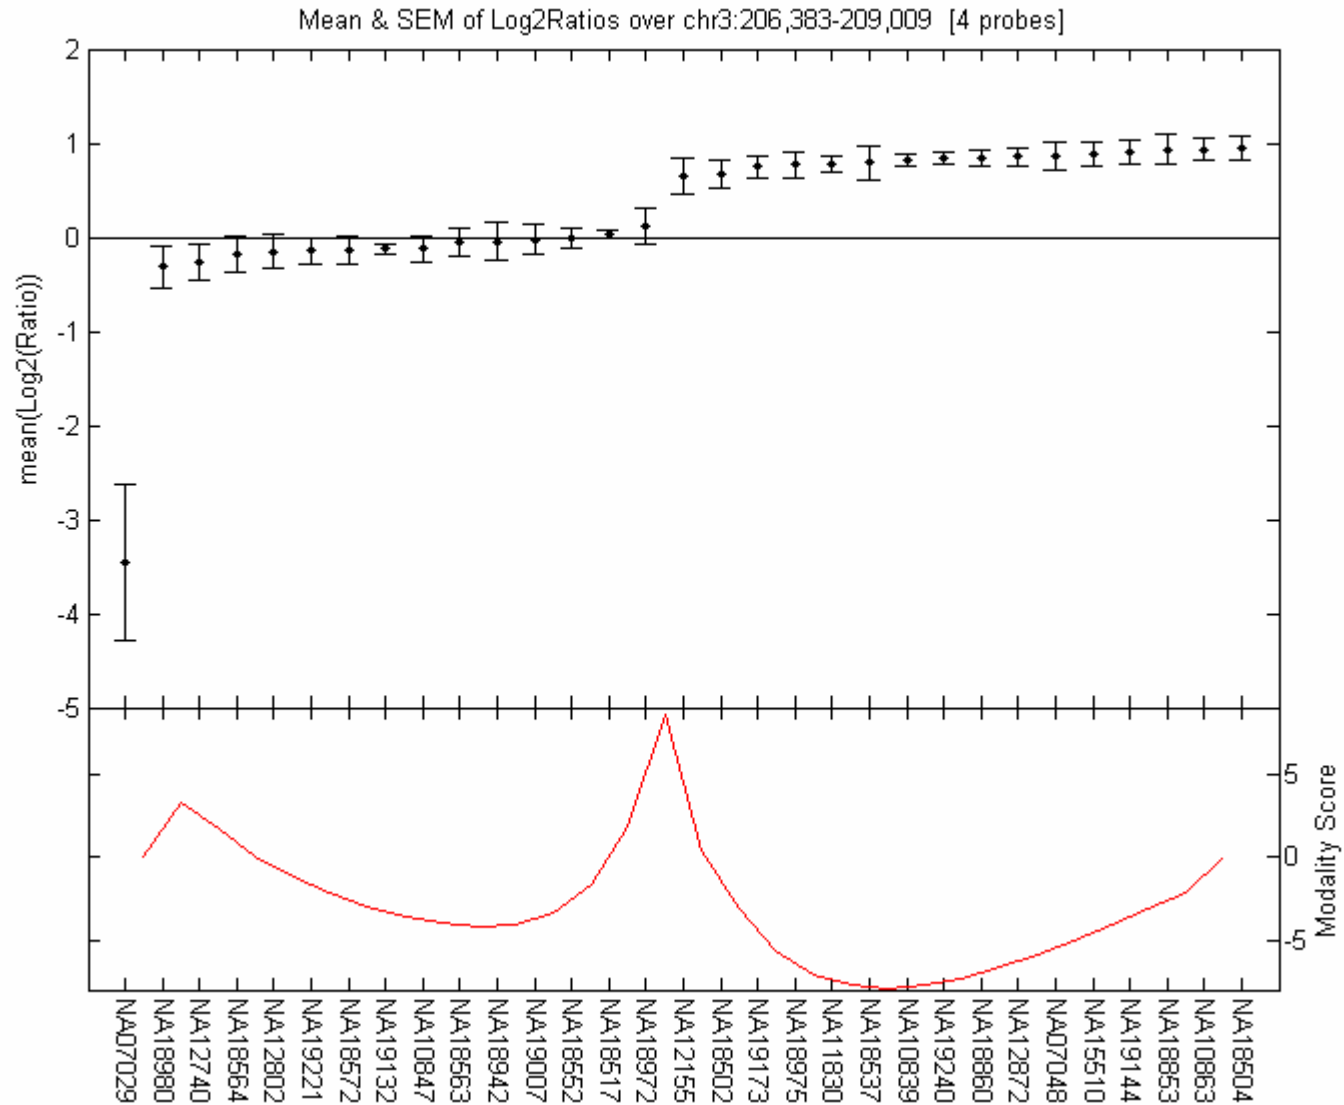



chr3:6,626,431-6,629,261 Score=19.3034

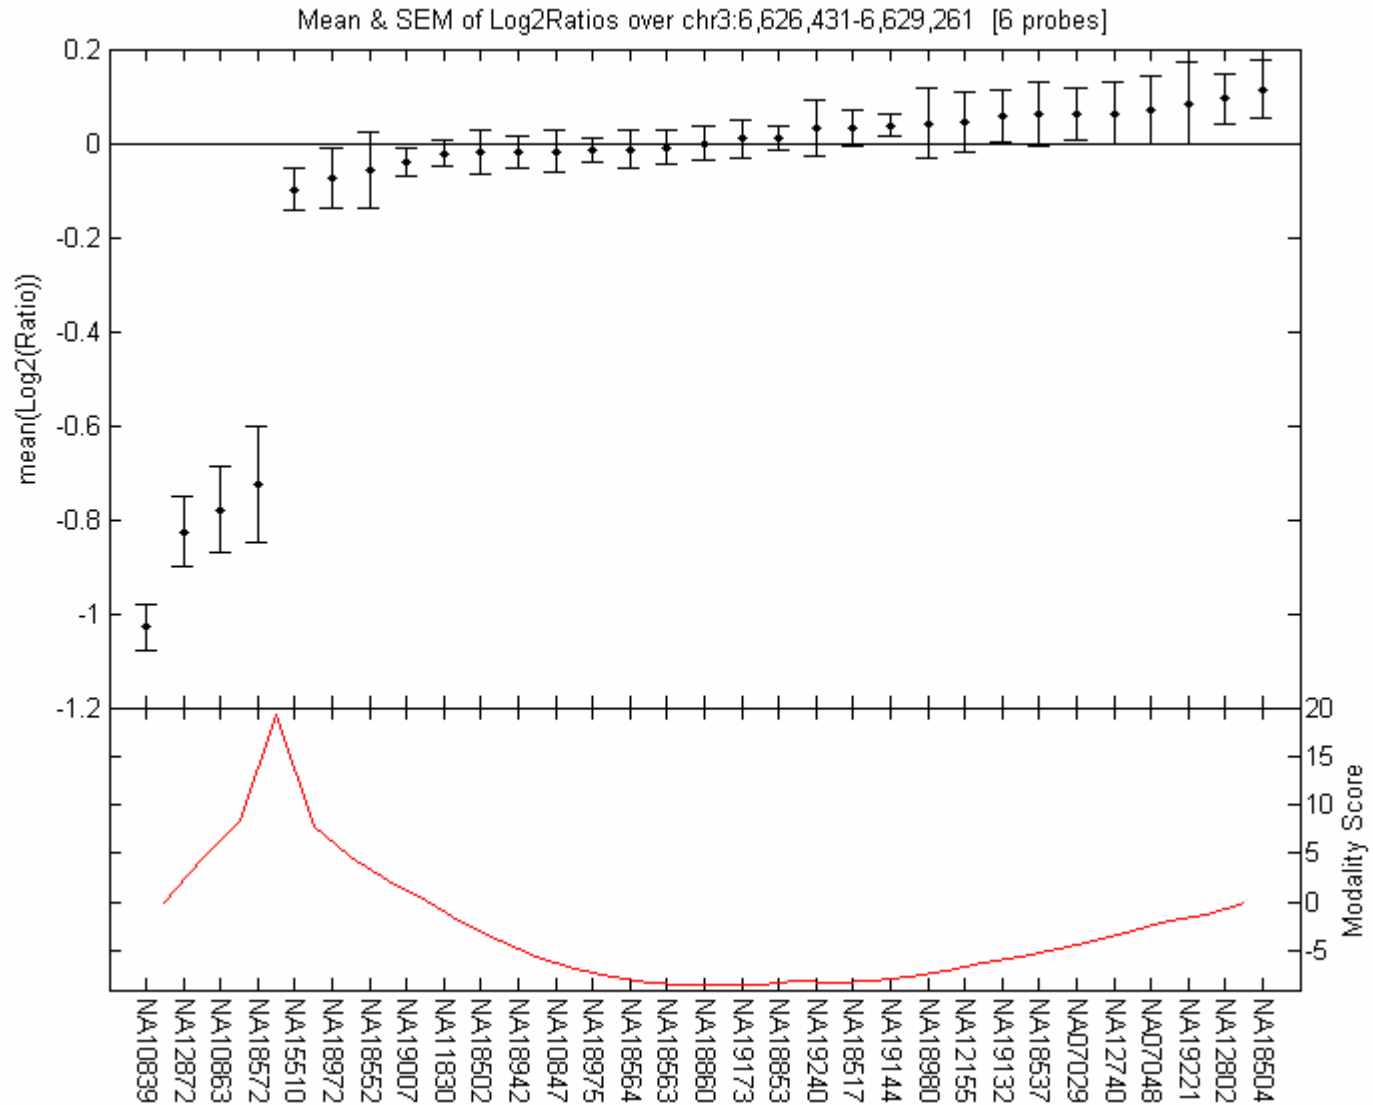

chr3:41,574,843-41,575,292 Score=14.3601

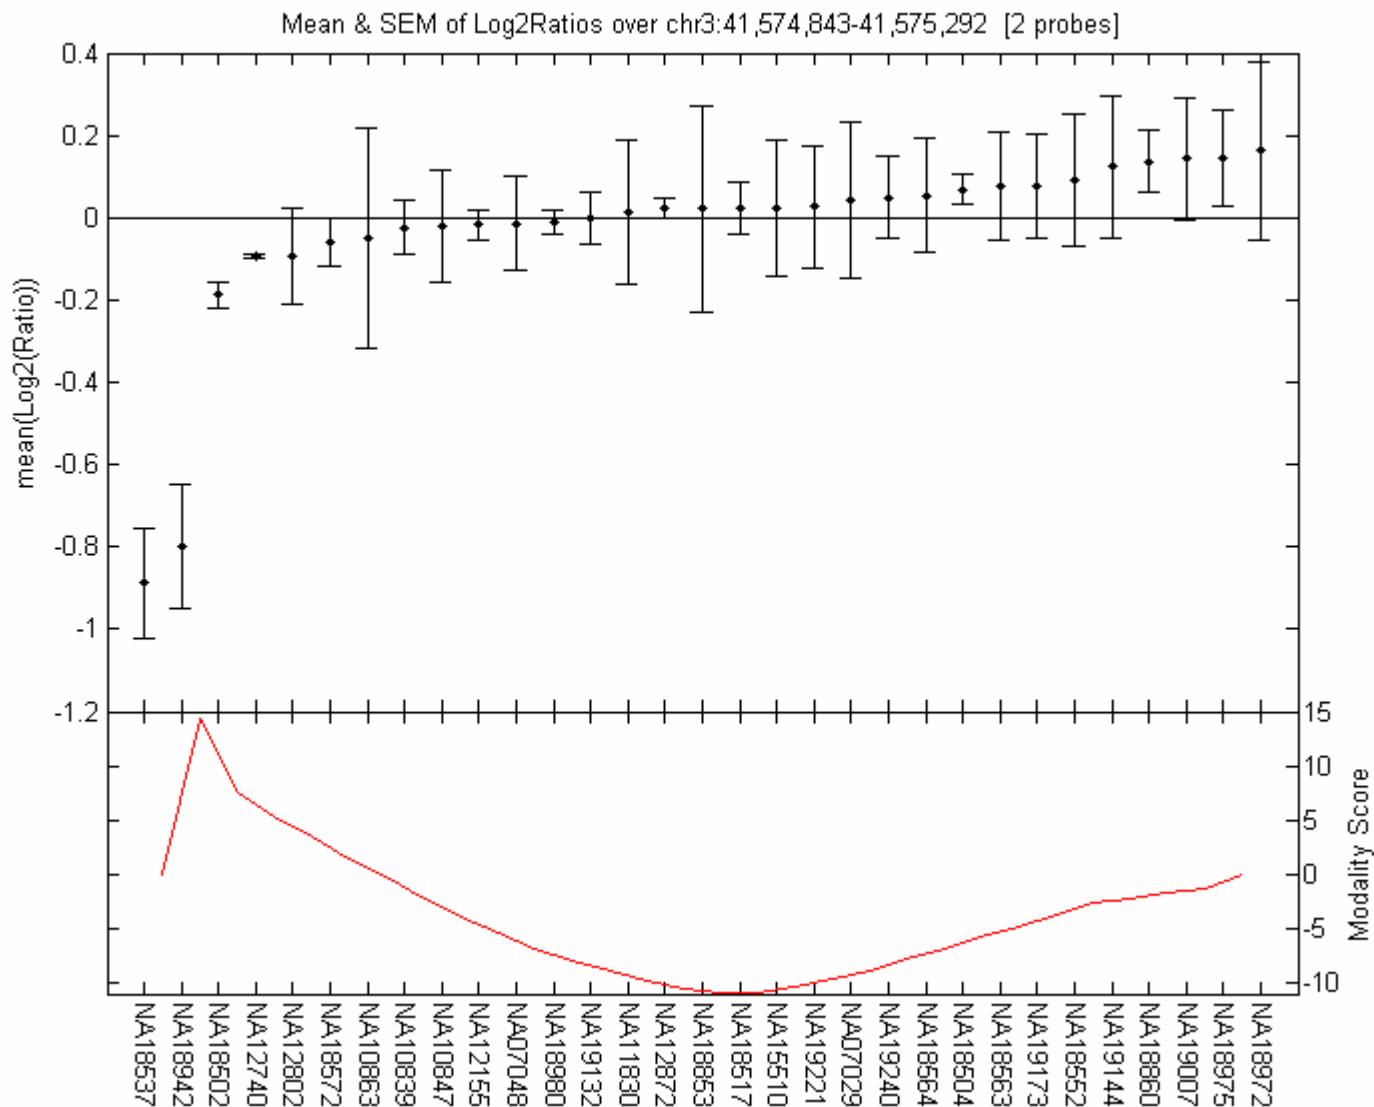

chr3:68,824,055-68,830,417 Score=11.3227

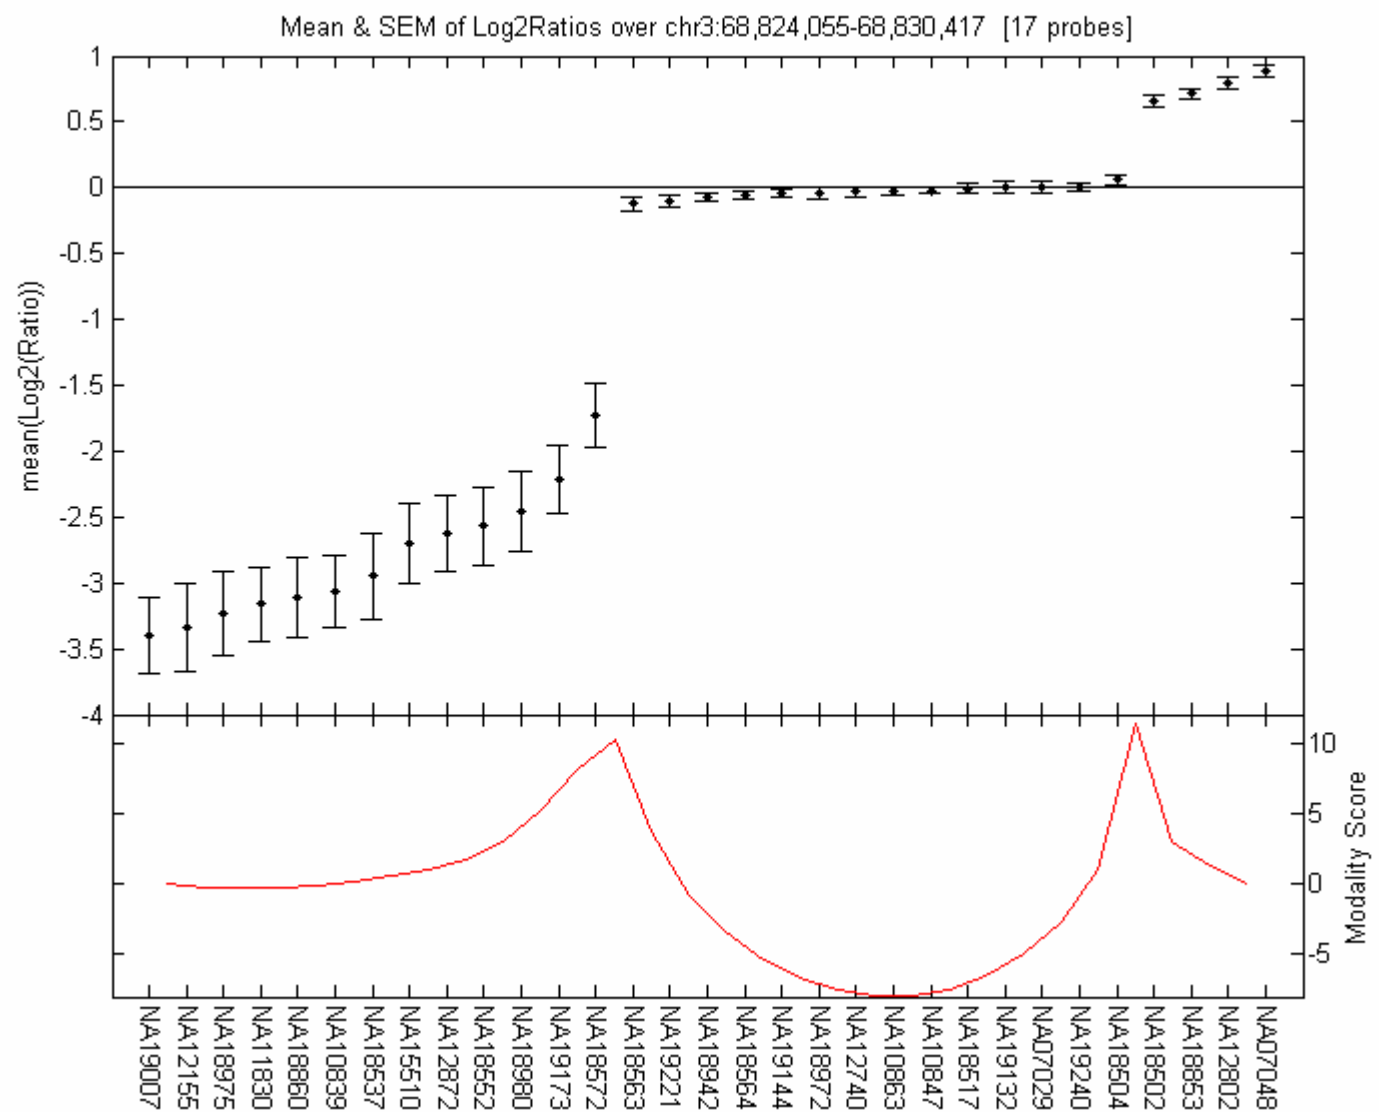

chr3:82,951,723-82,955,245 Score=14.207

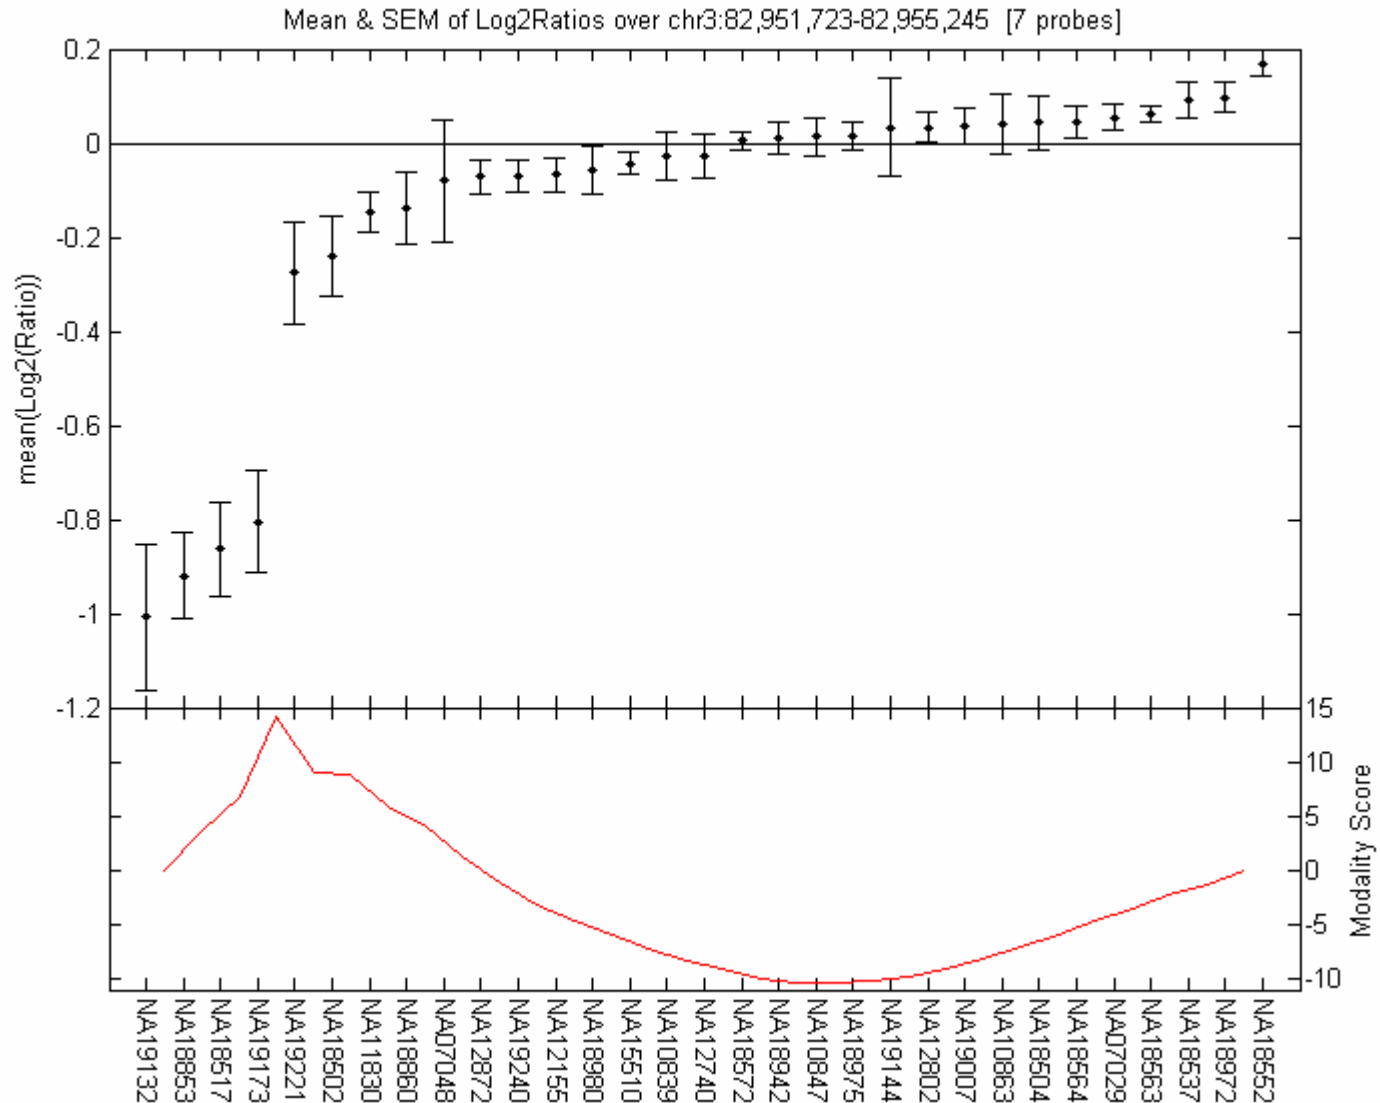

chr3:89,752,823-89,760,716 Score=20.2612

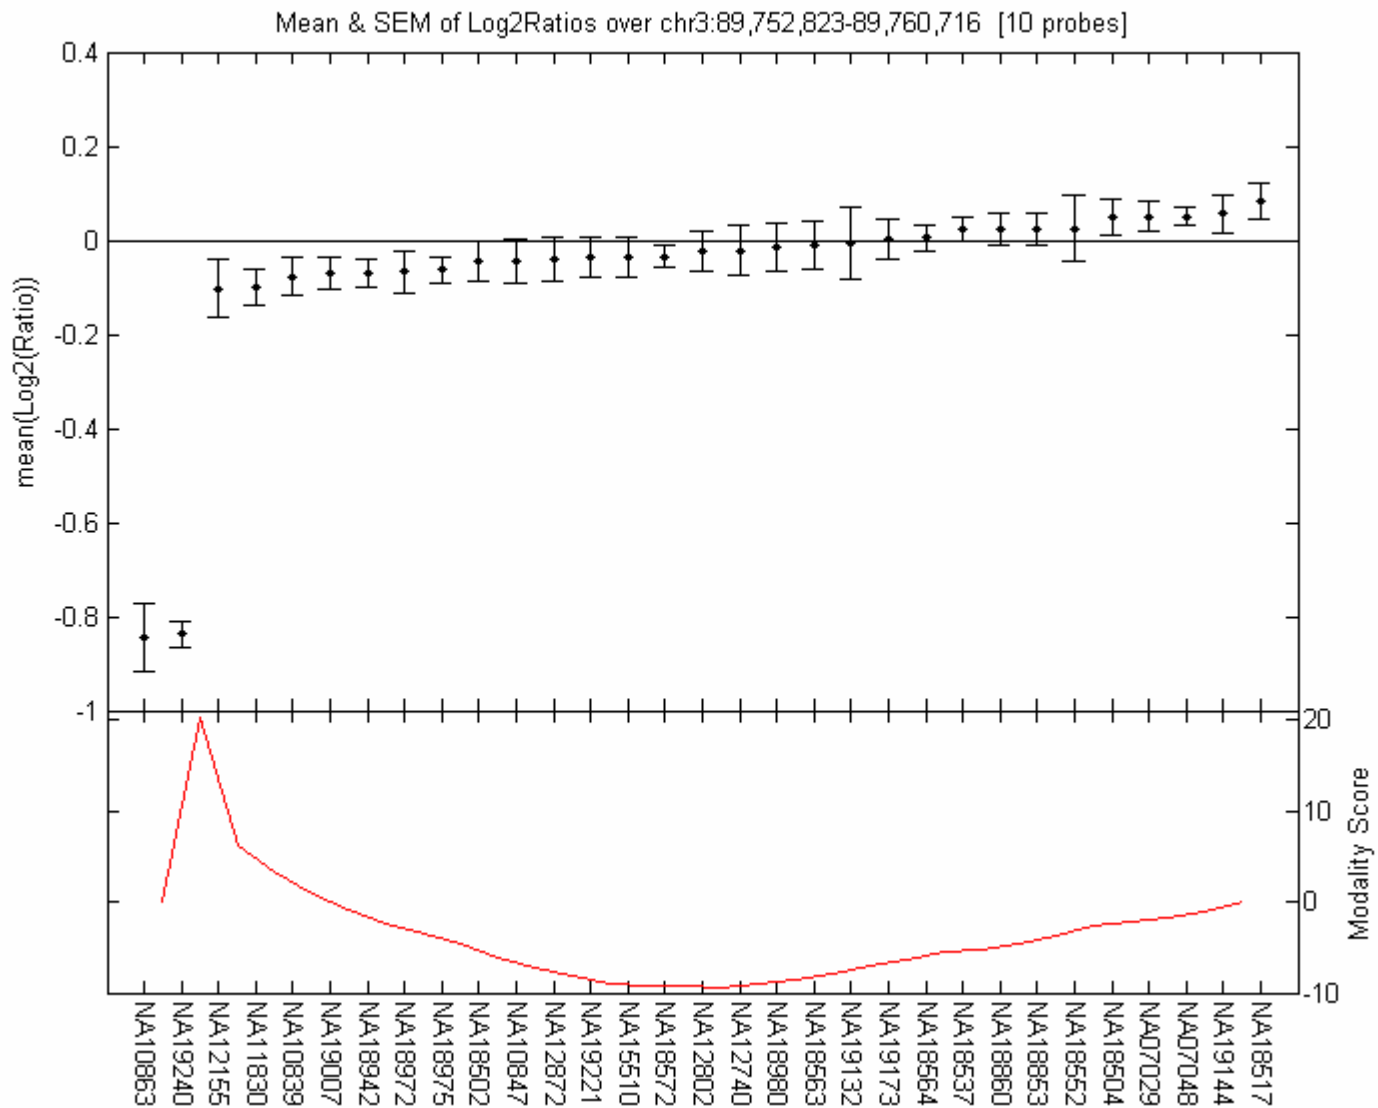

chr3:100,426,149-100,431,494 Score=19.8216

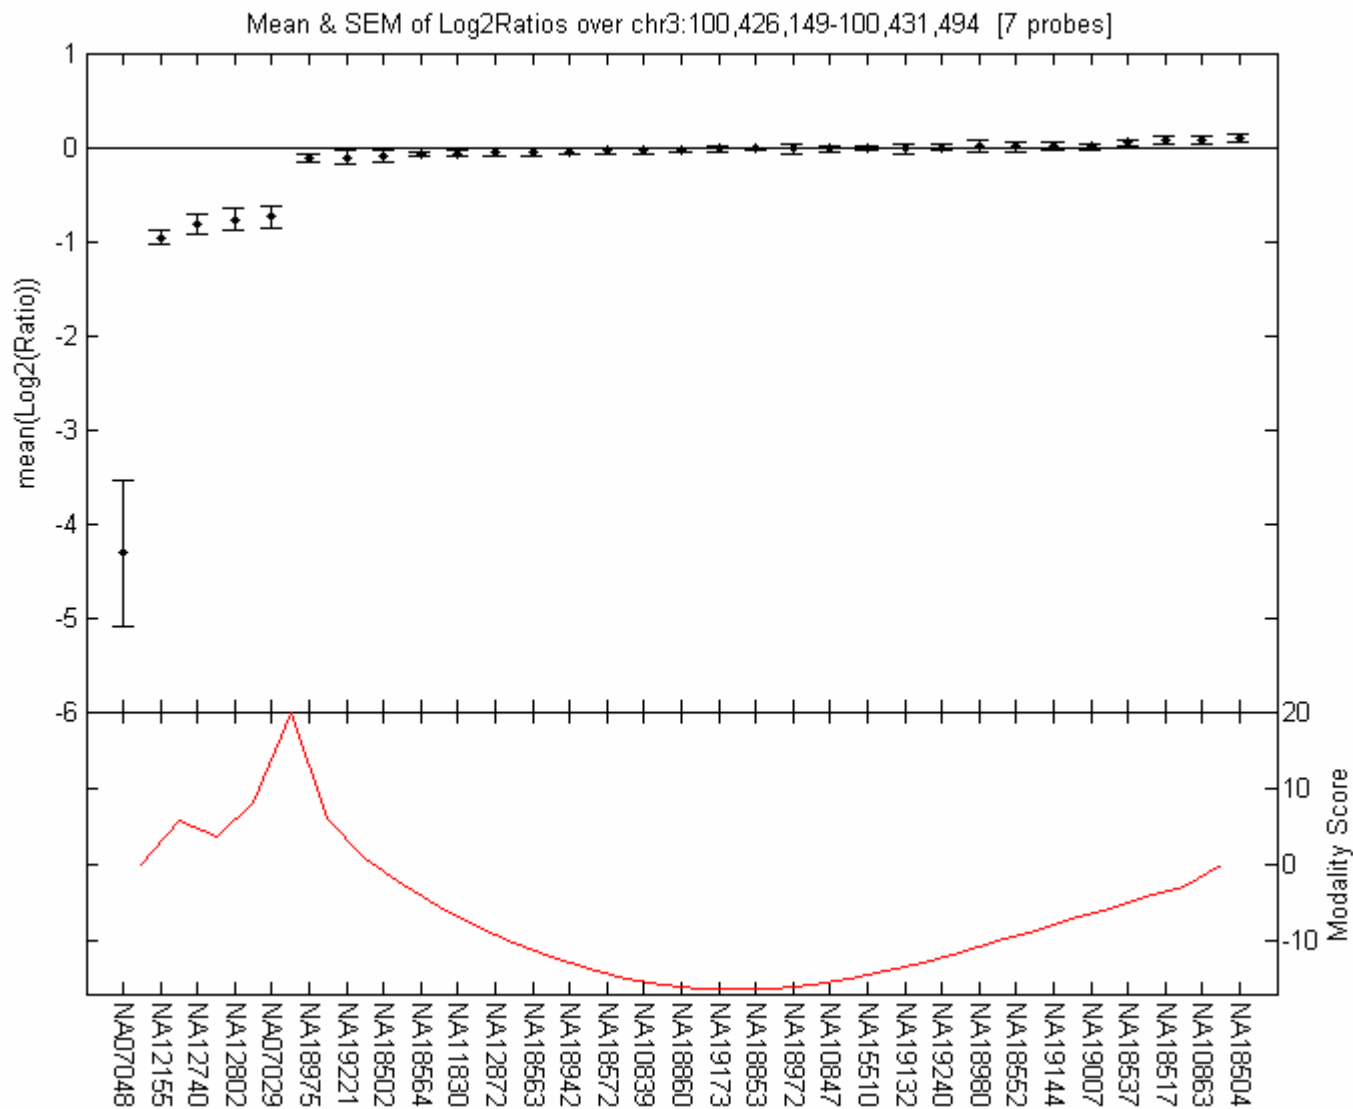

chr3:105,760,890-105,761,424 Score=12.8997

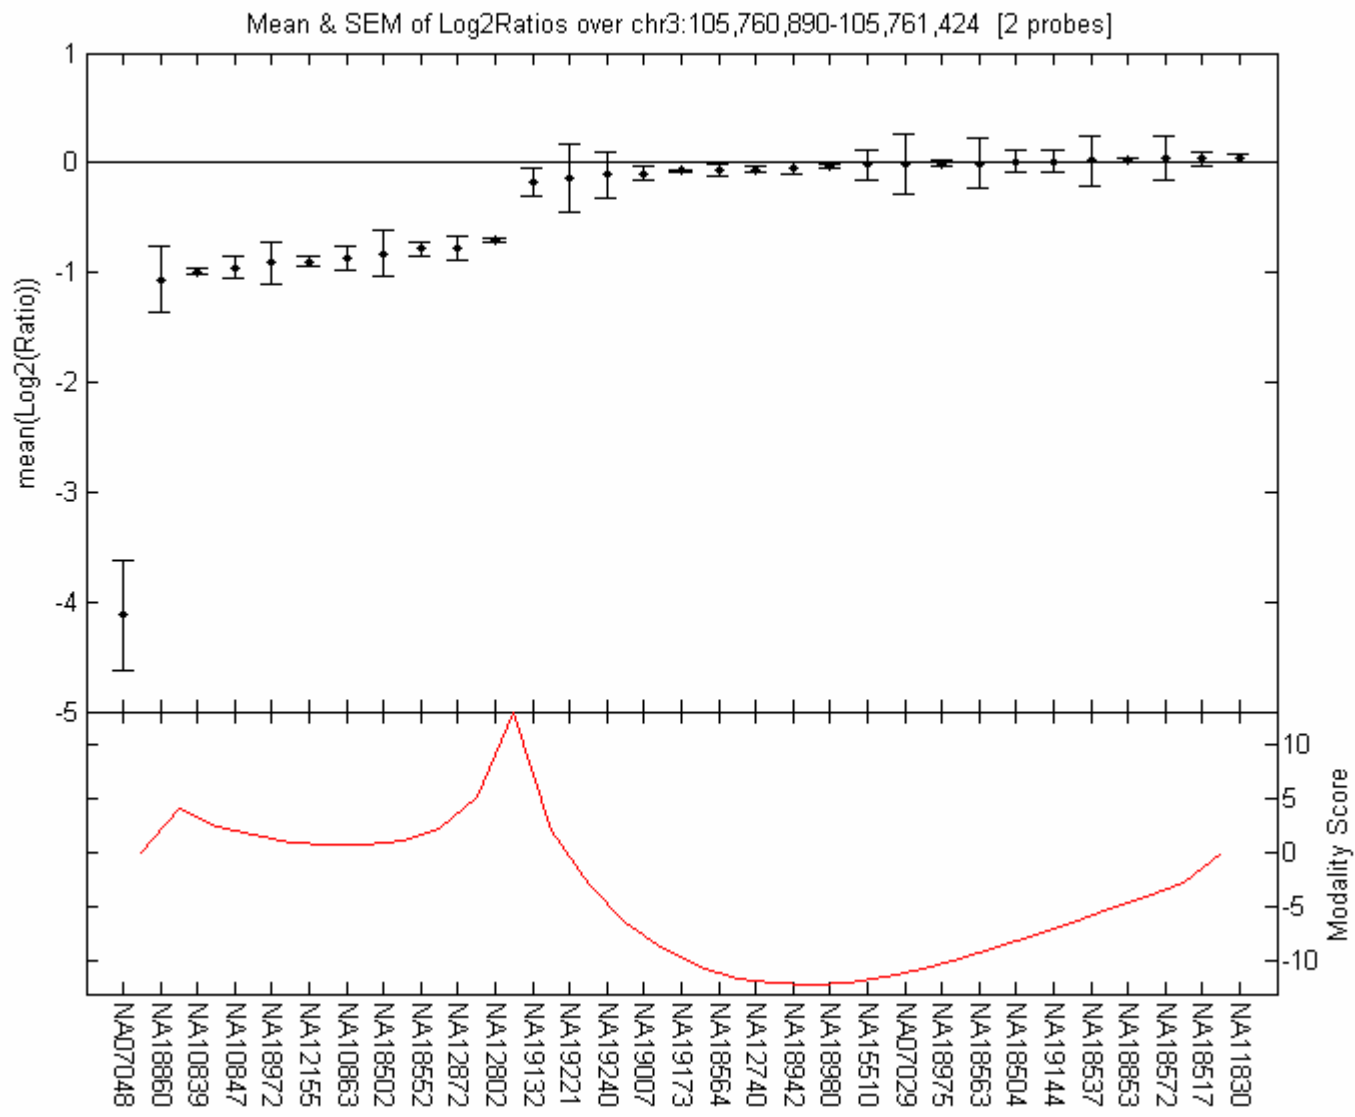

chr3:106,127,758-106,128,182 Score=13.792

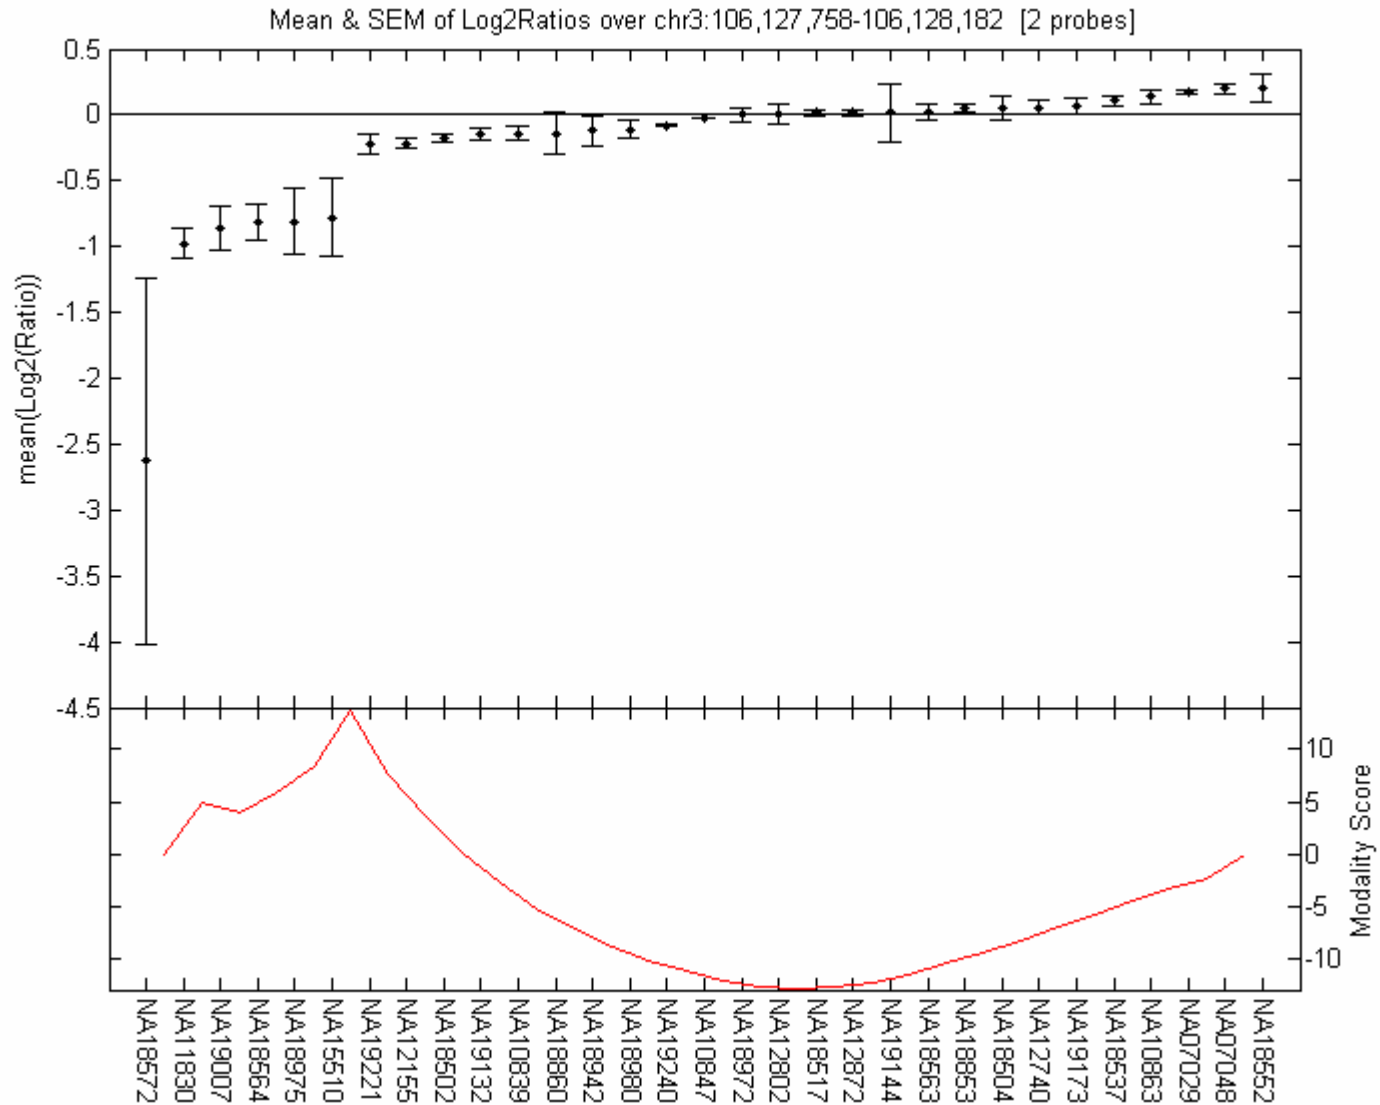



chr3:116,141,040-116,146,974 Score=22.6521

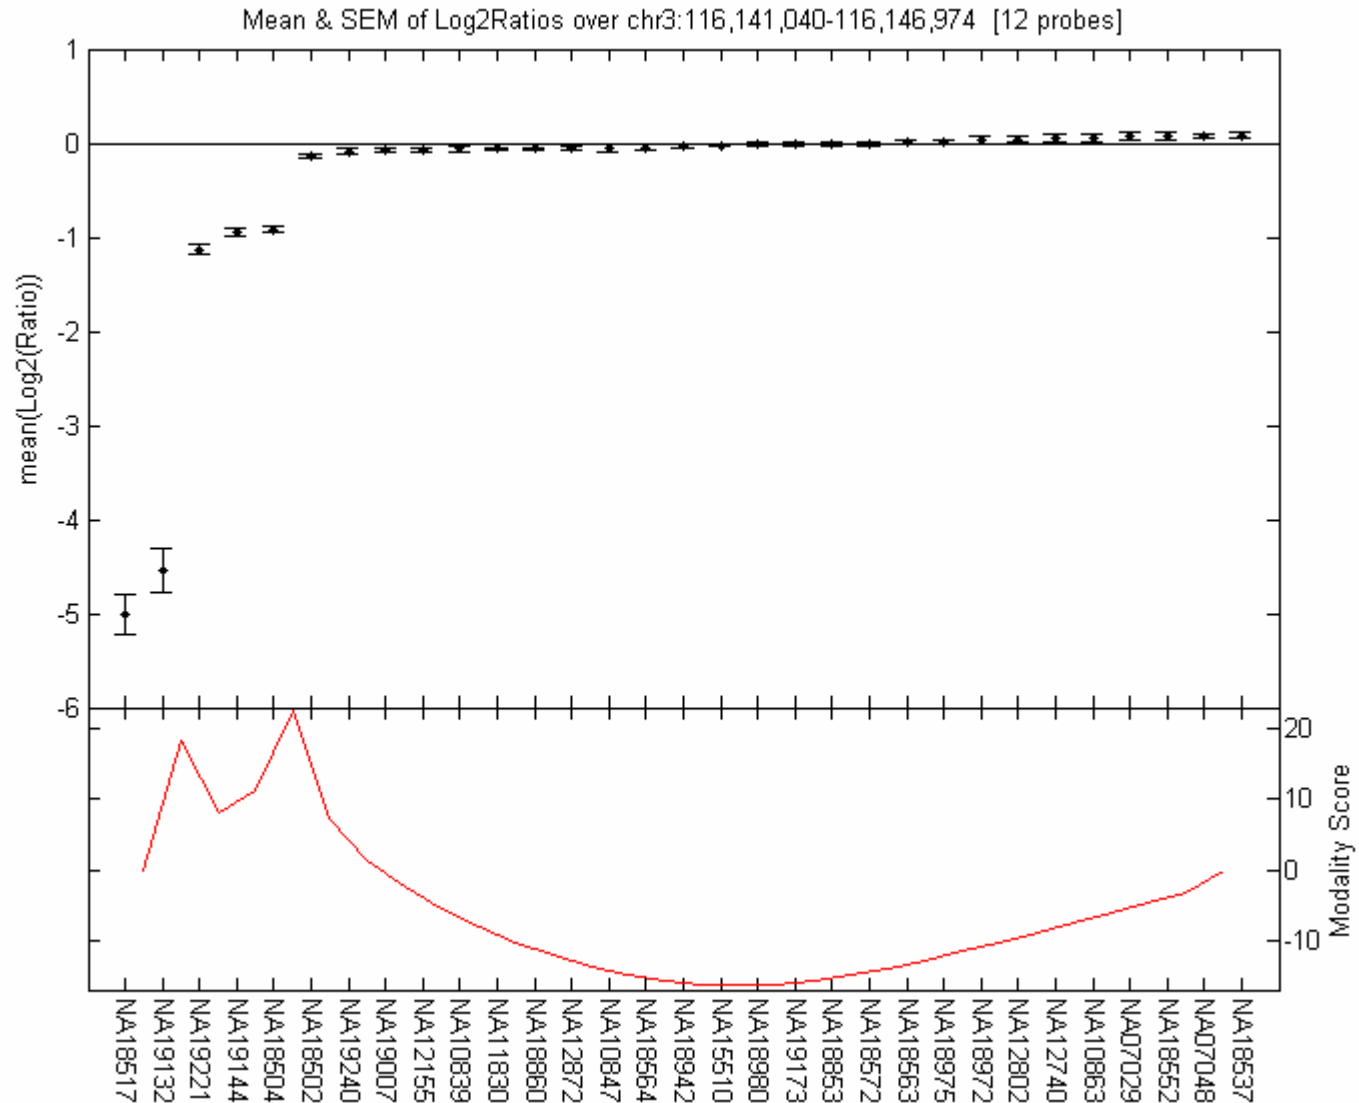

chr3:133,191,965-133,195,824 Score=12.0442

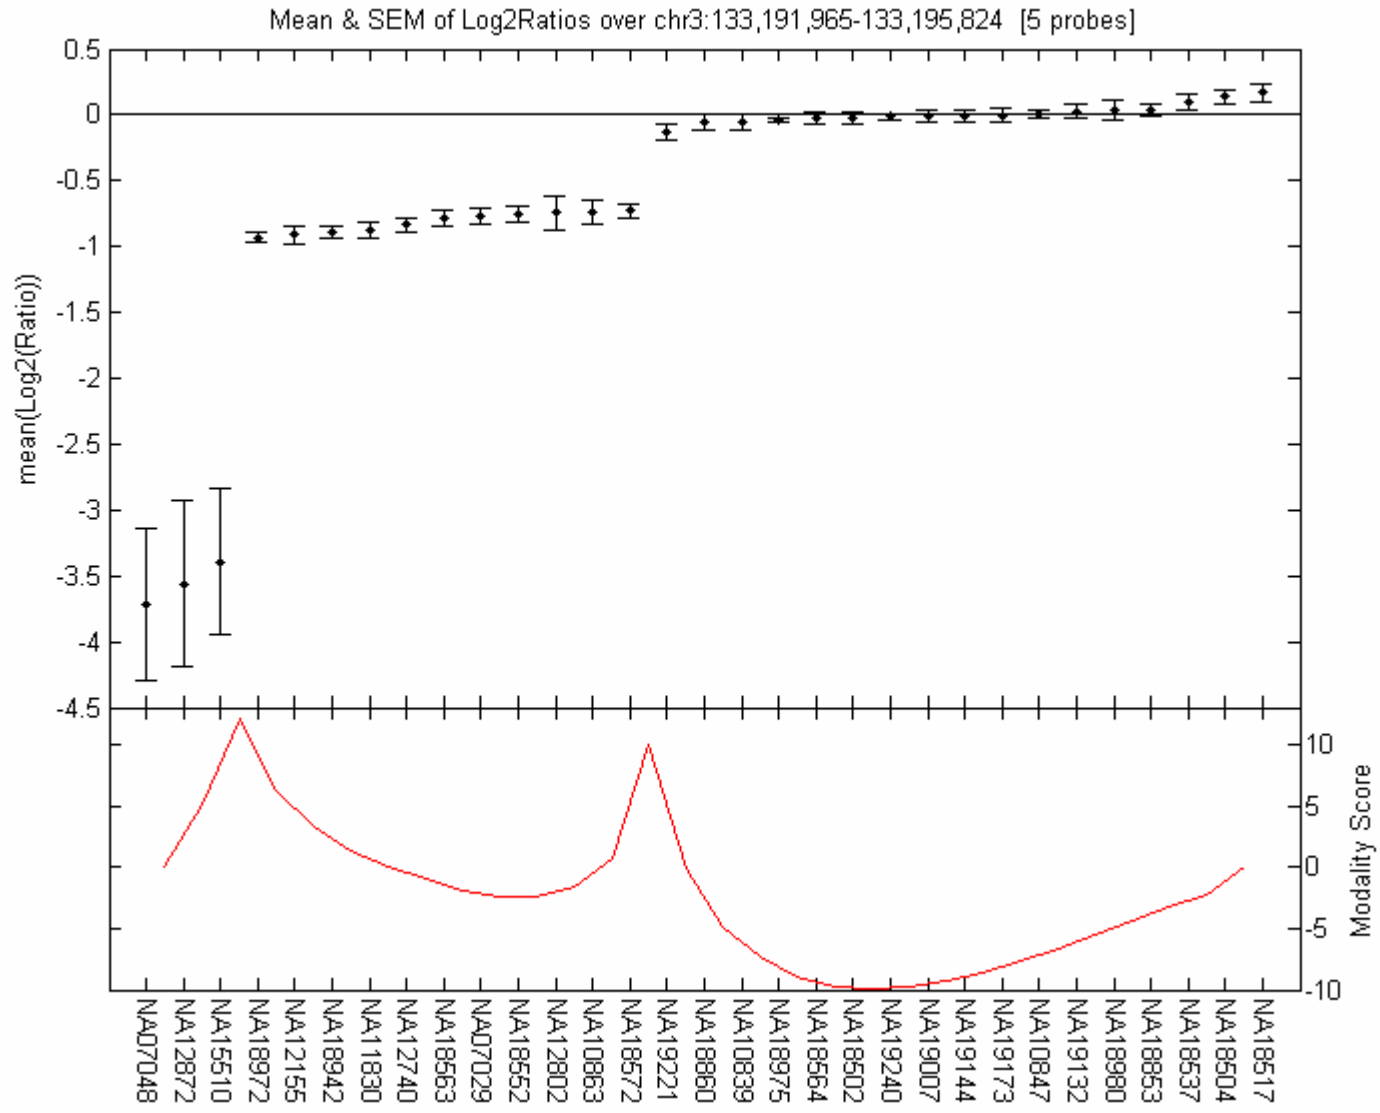

chr3:144,702,479-144,703,331 Score=14.4445

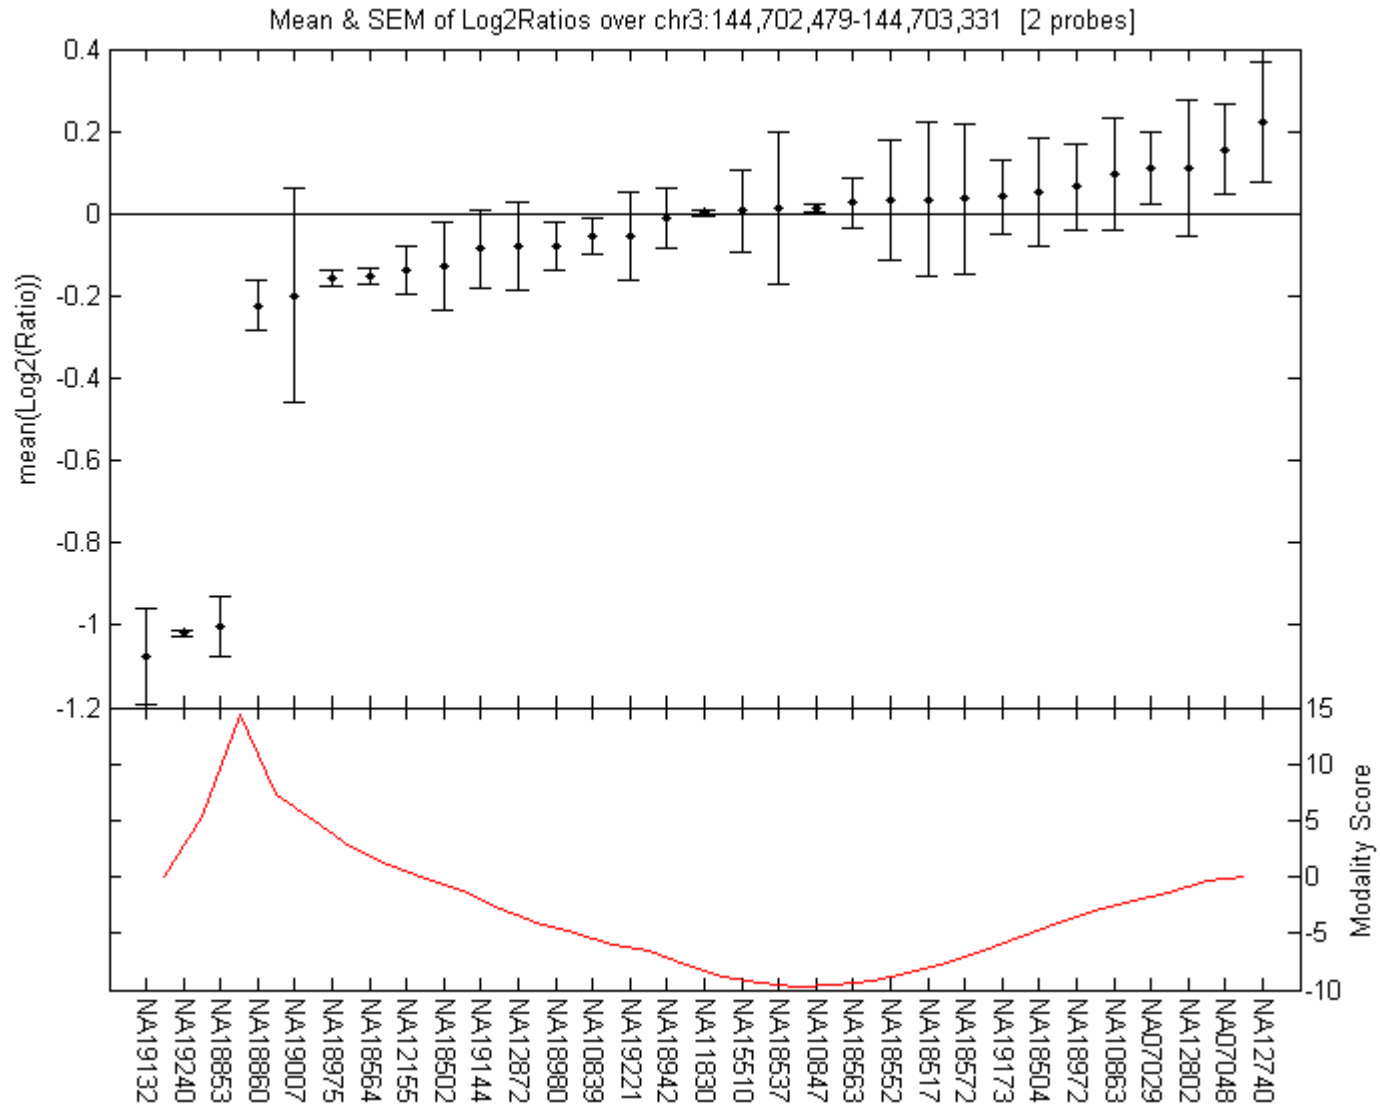

chr3:150,446,909-150,451,900 Score=20.3023

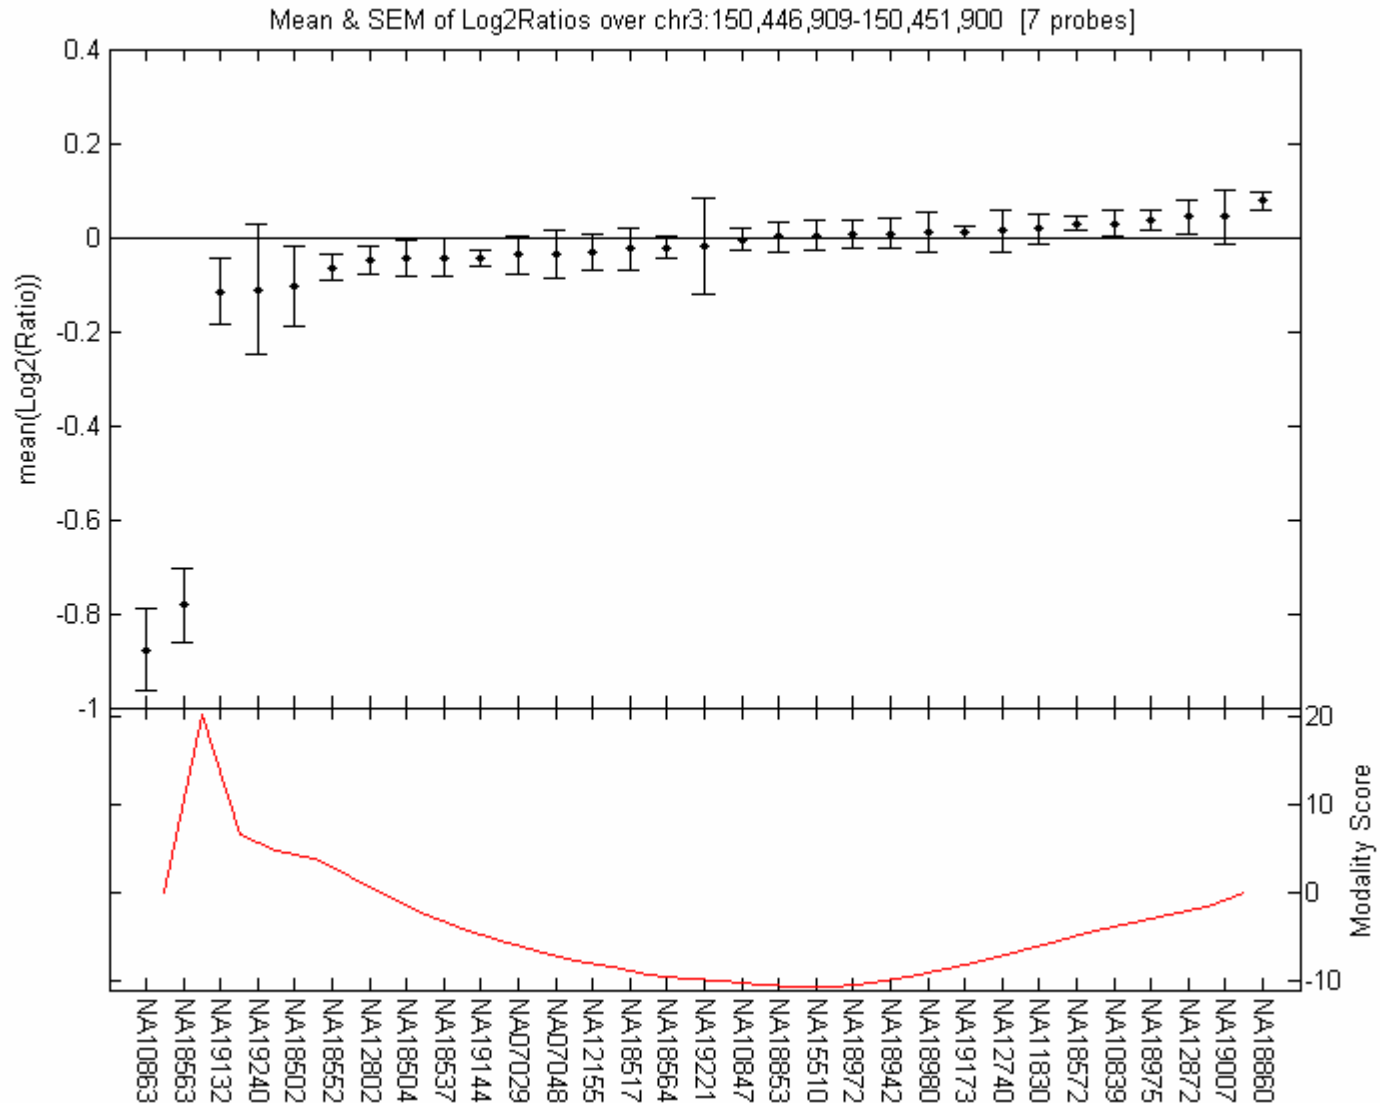

chr3:161,838,896-161,848,436 Score=26.099

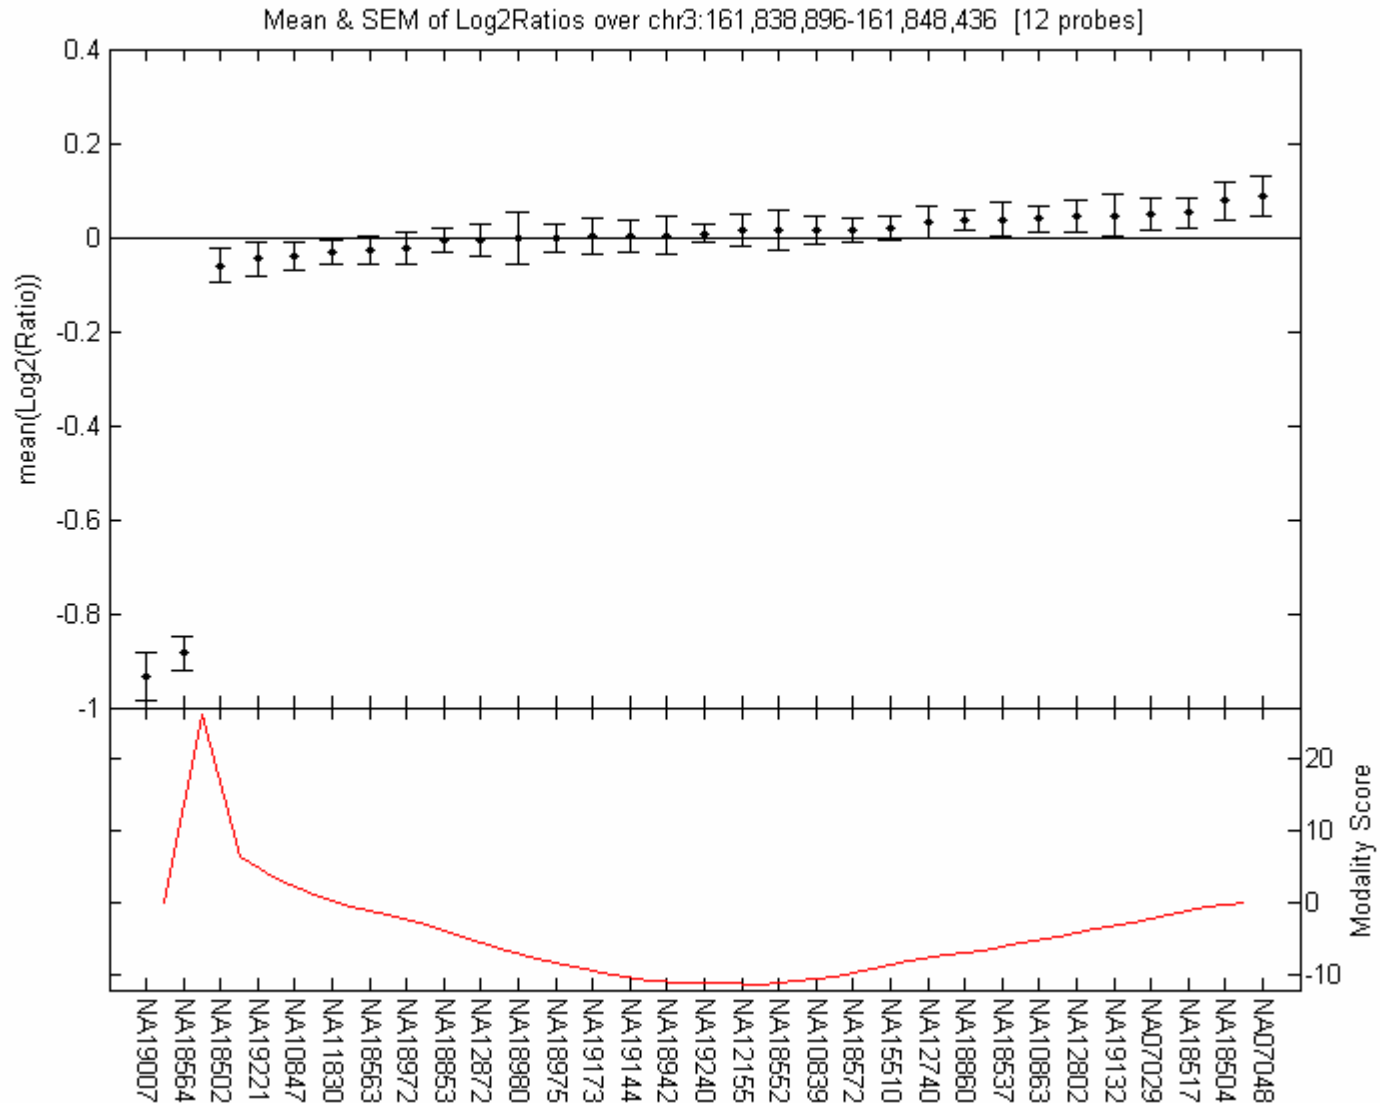

chr3:163,698,282-163,717,674 Score=19.5311

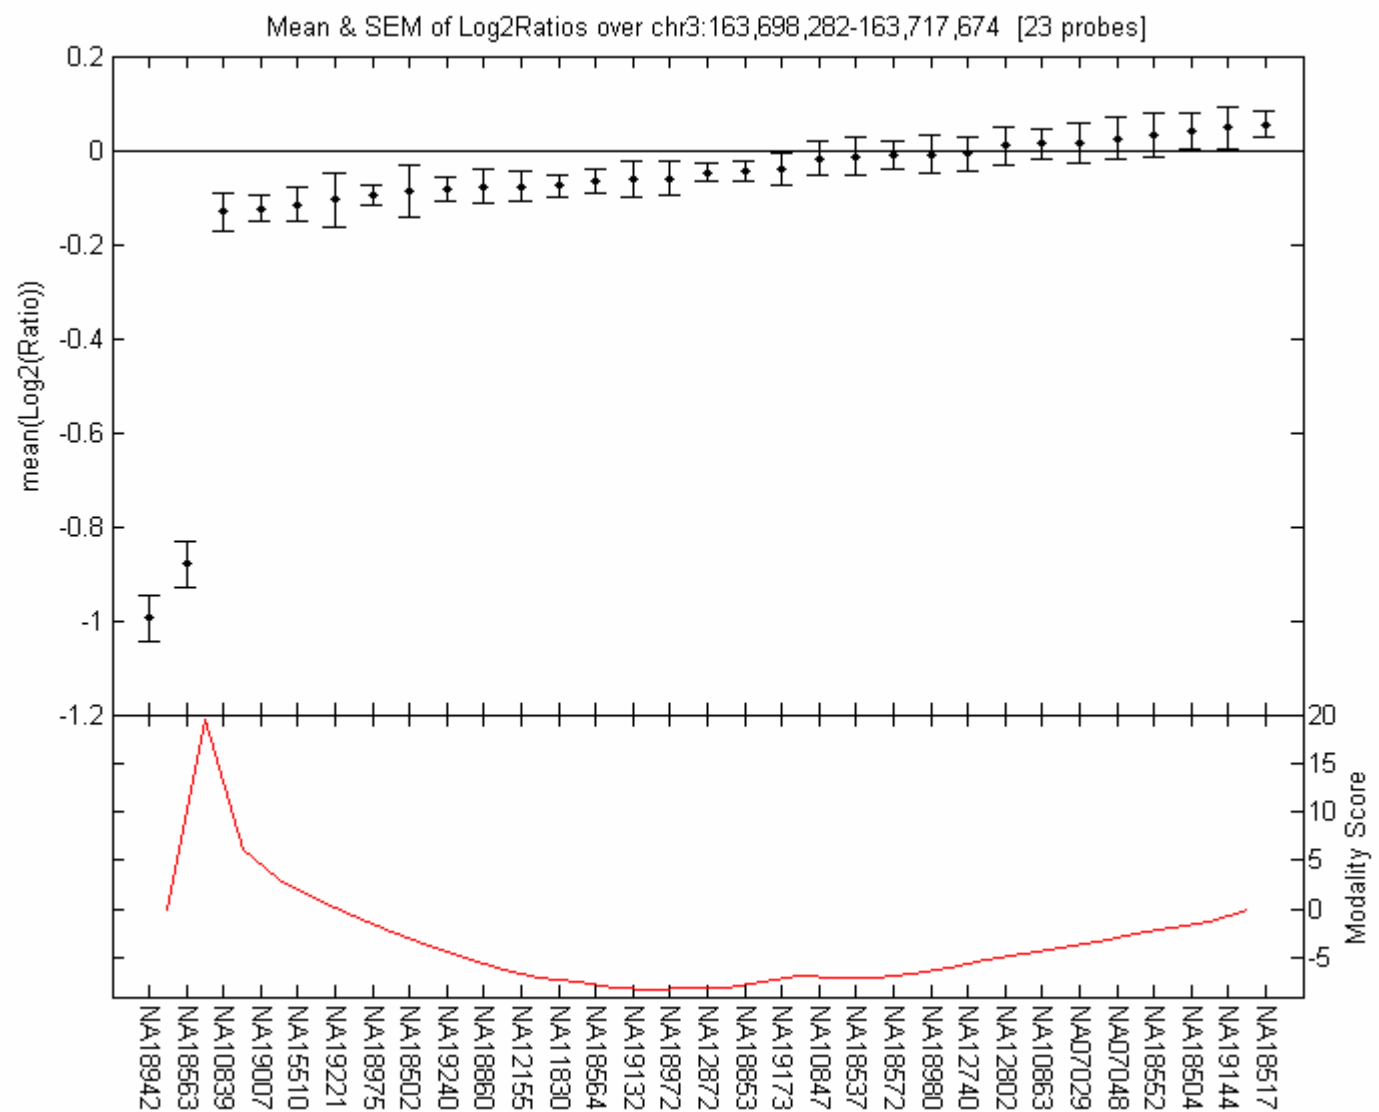

chr3:164,200,187-164,204,674 Score=13.1556

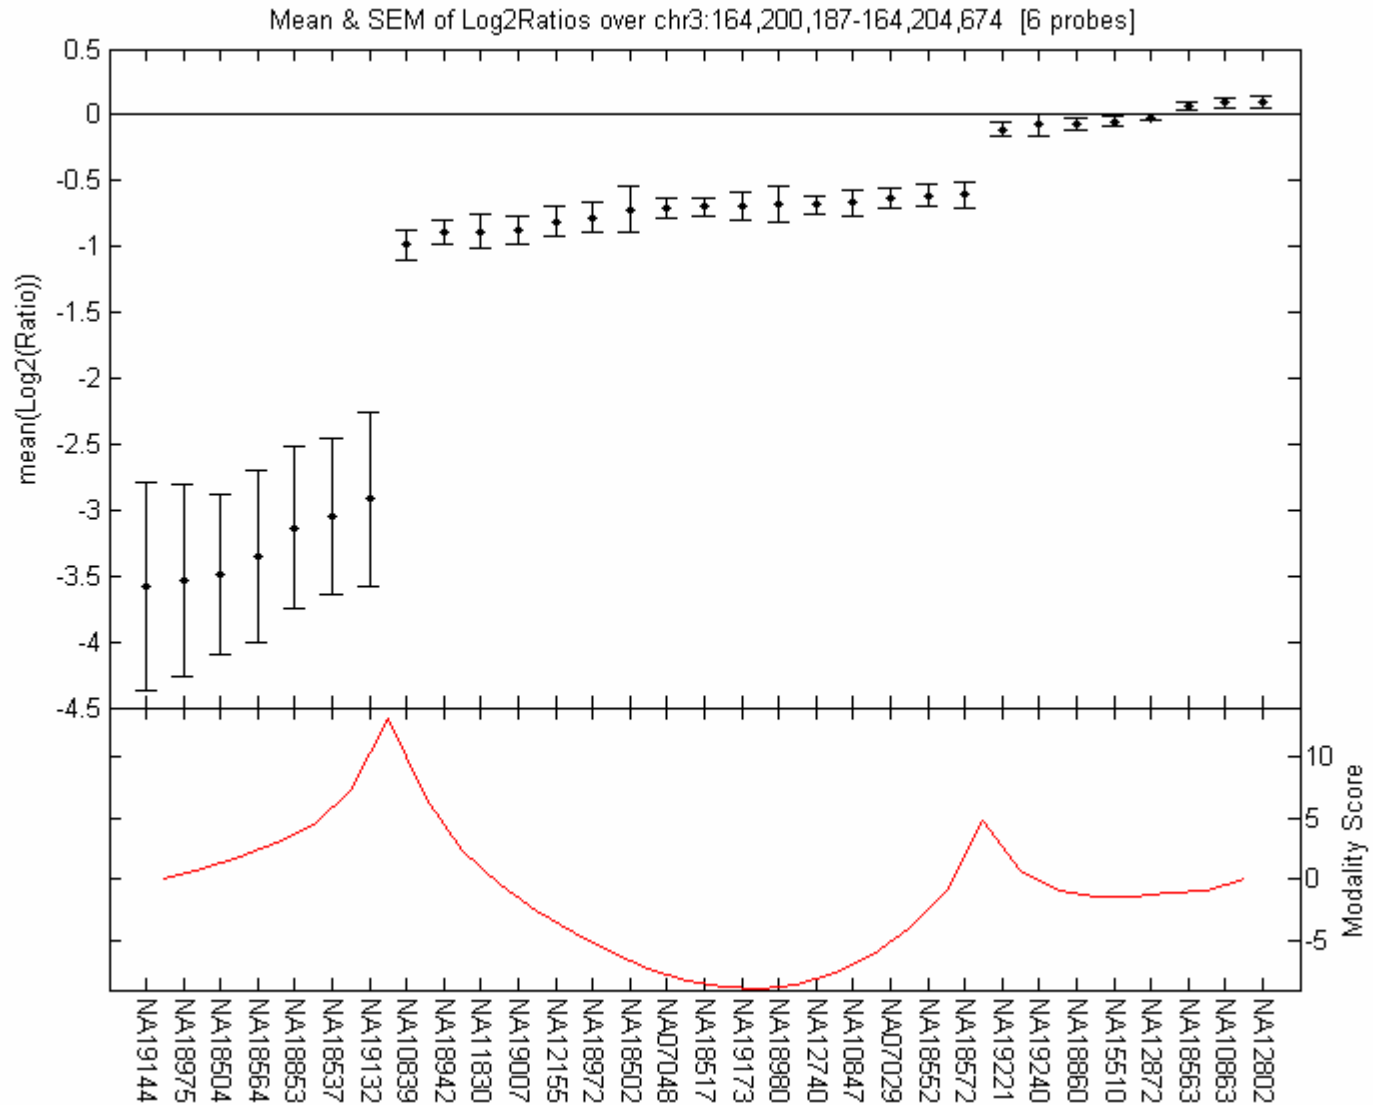

chr3:176,563,654-176,565,991 Score=21.2361

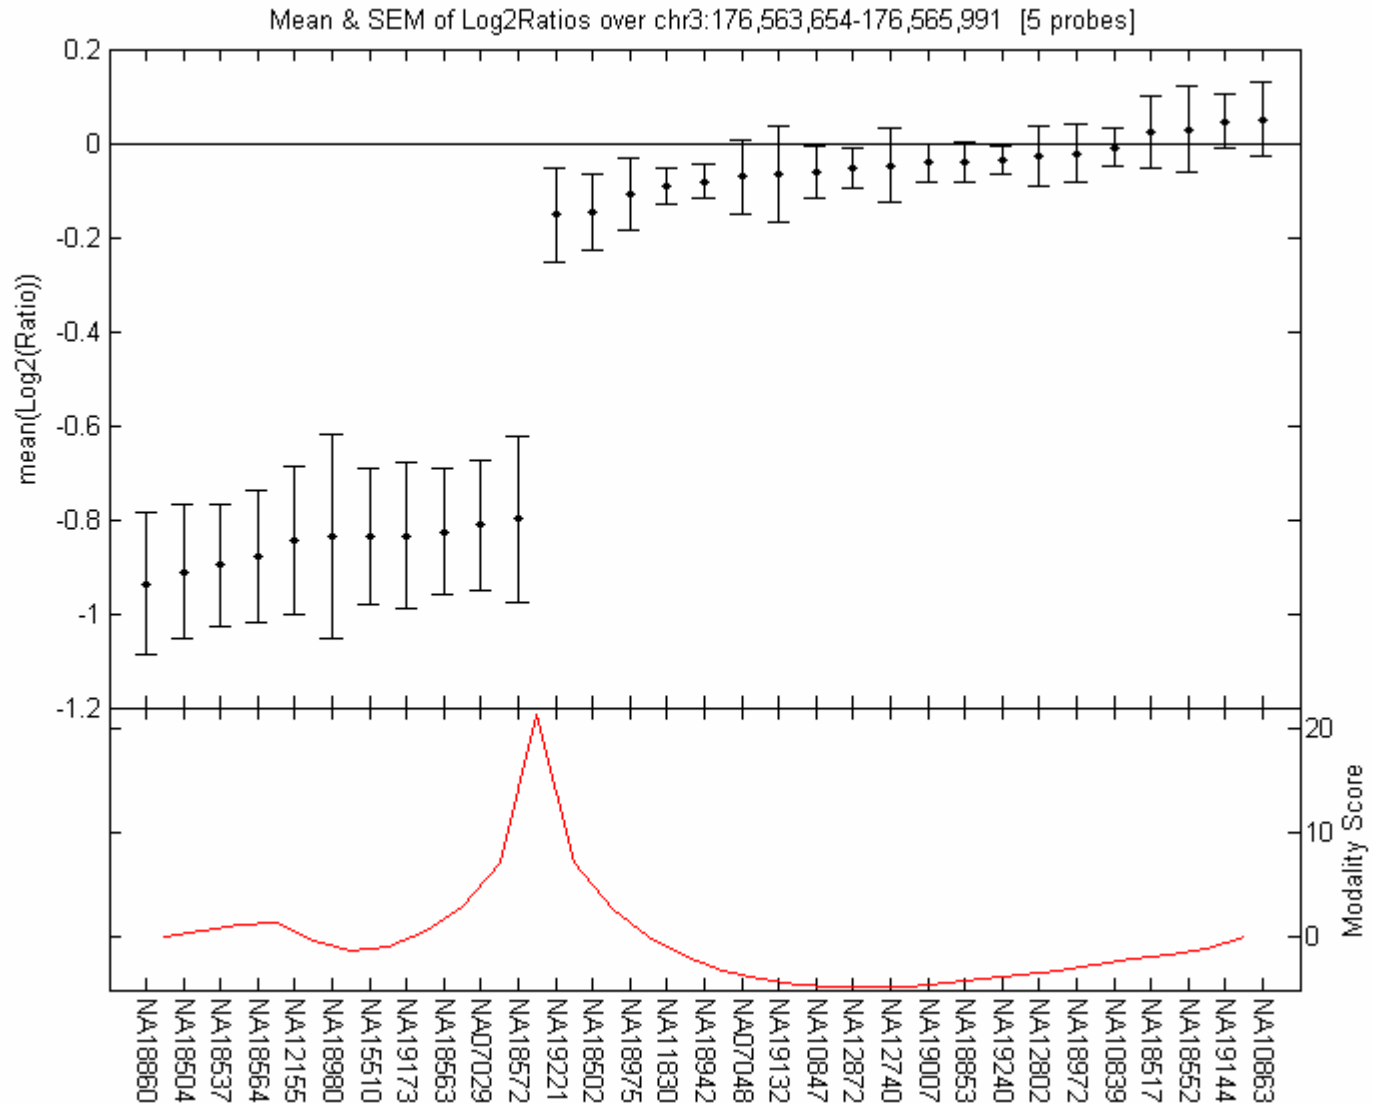



chr3:178,777,243-178,779,683 Score=19.2762

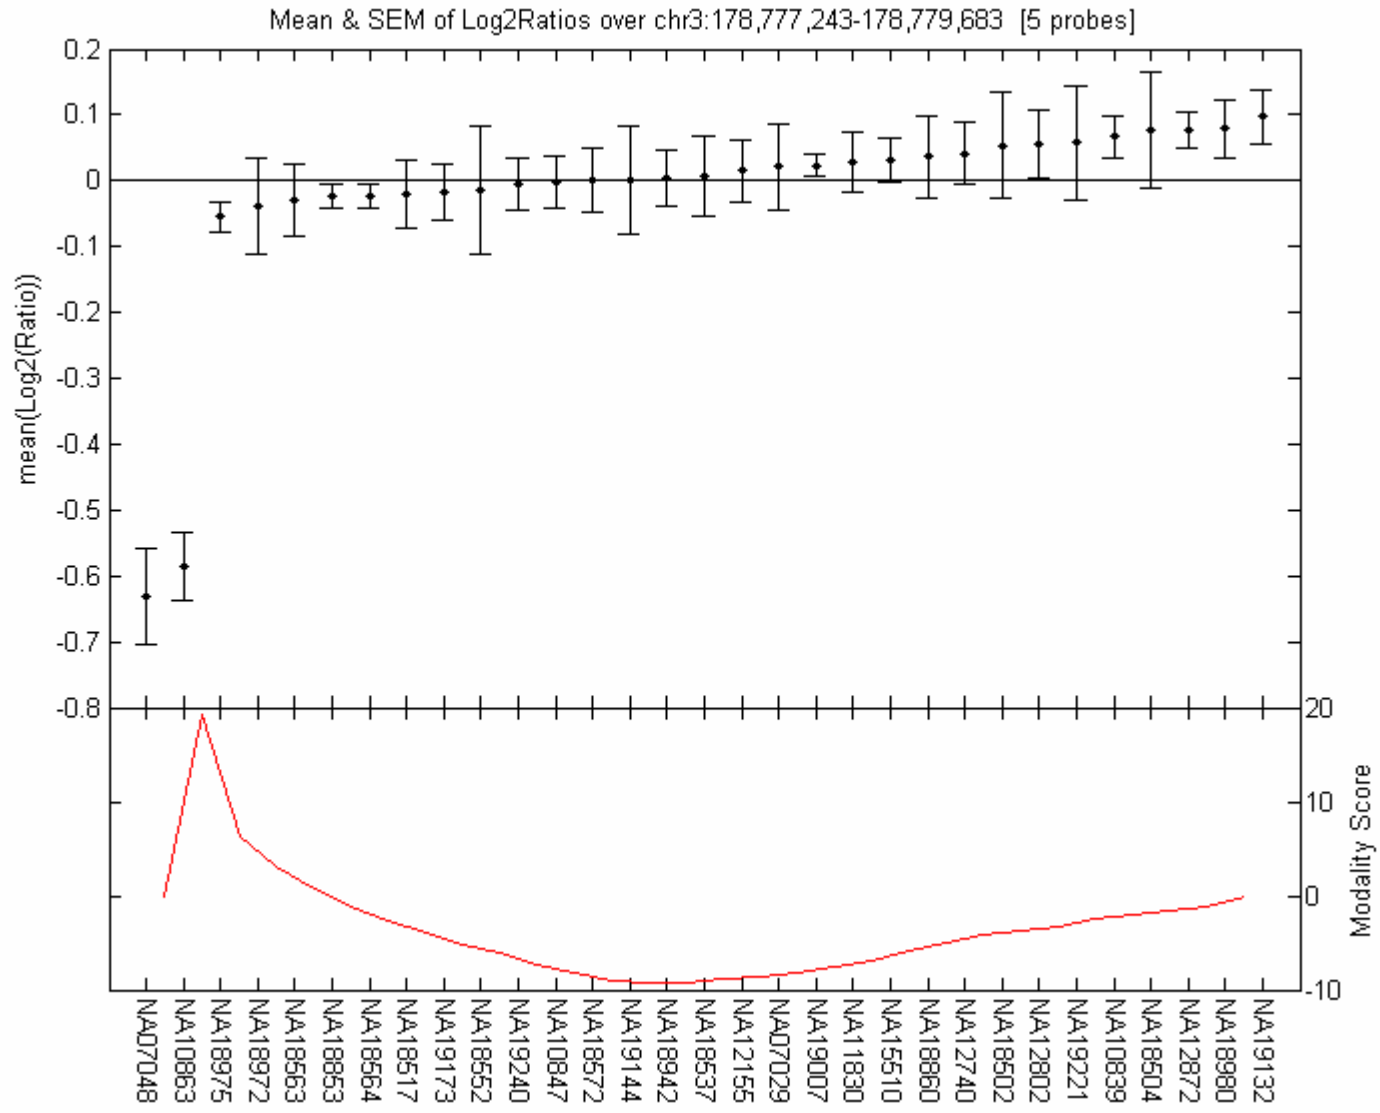

chr3:190,846,809-190,850,598 Score=21.0937

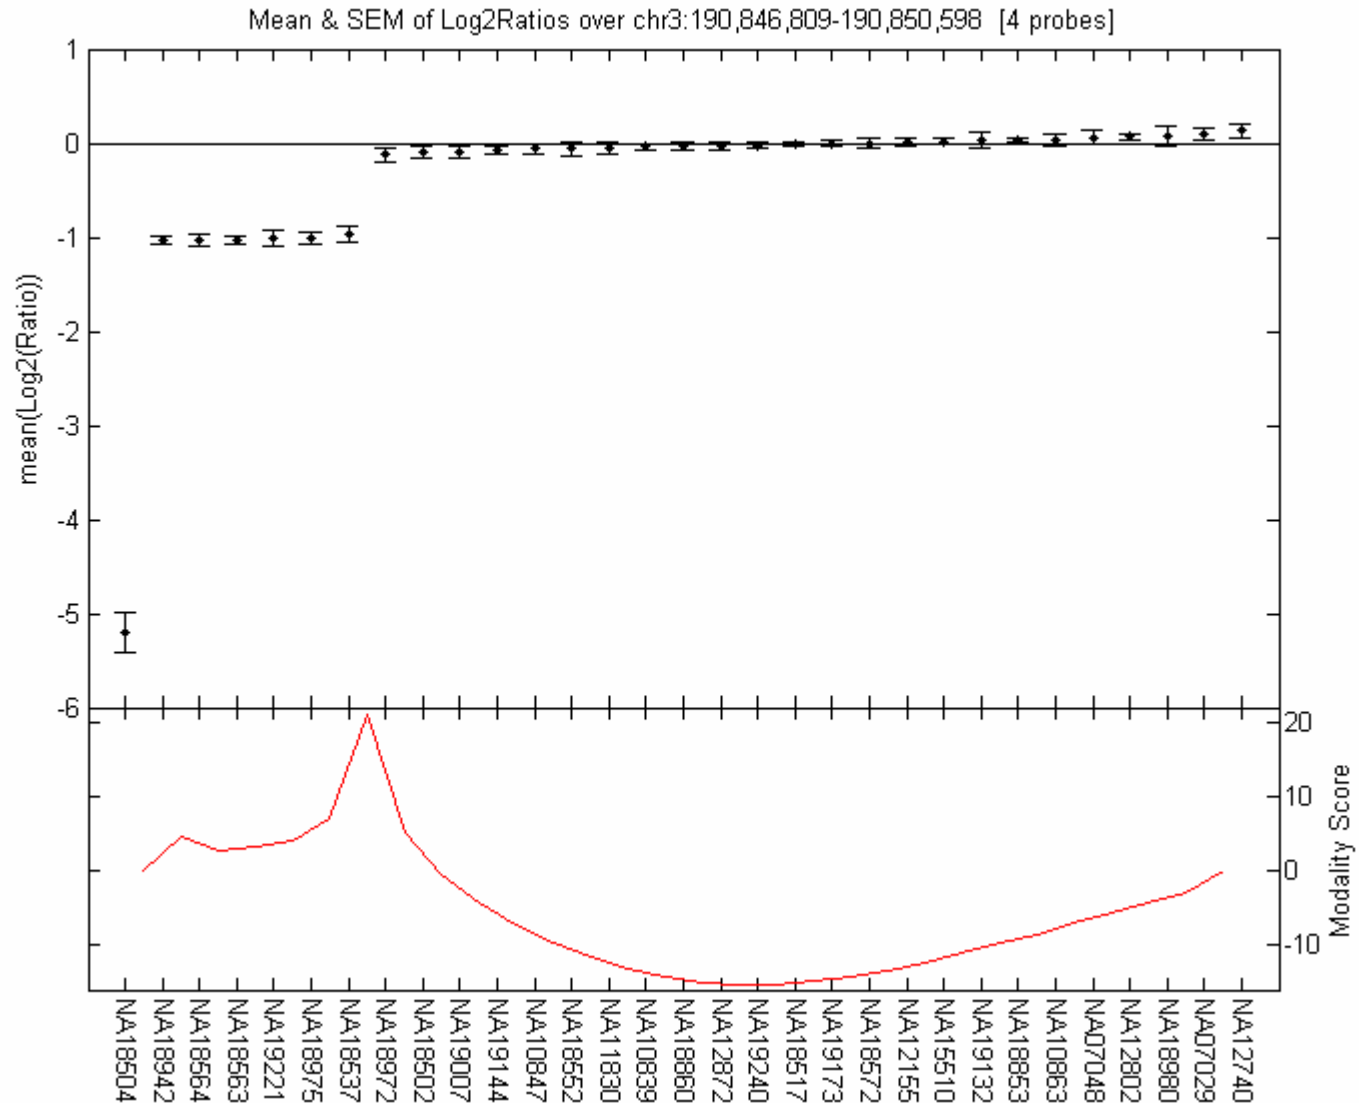

chr3:191,220,336-191,222,918 Score=14.2973

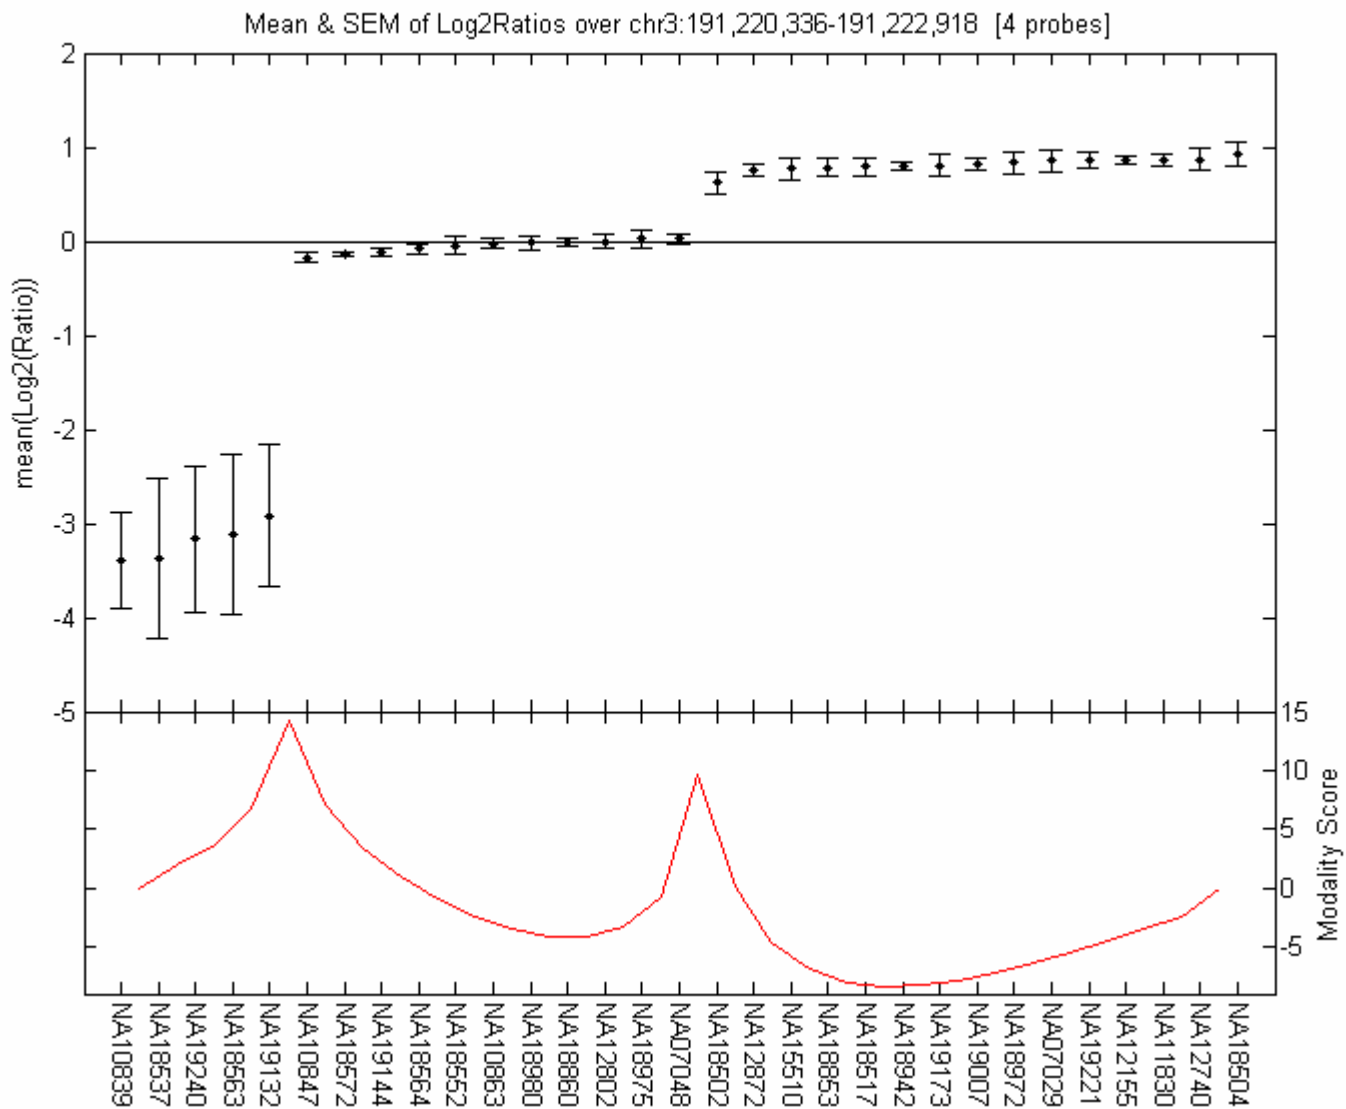

chr3:196,041,990-196,049,206 Score=16.7058

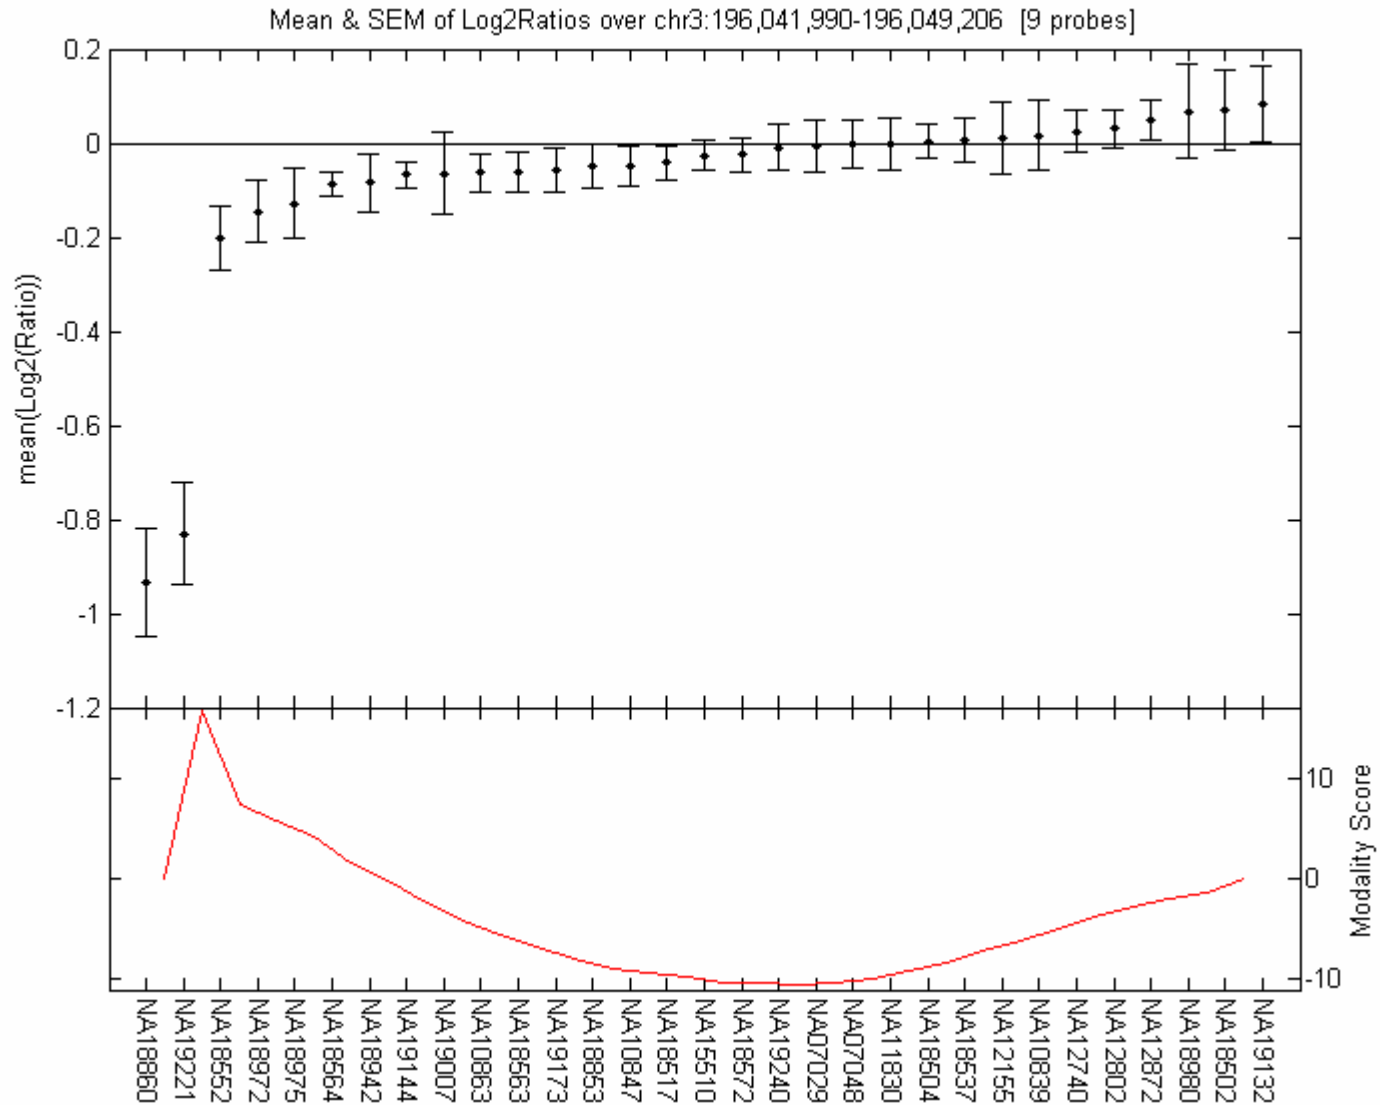

chr3:197,691,538-197,693,350 Score=19.1658

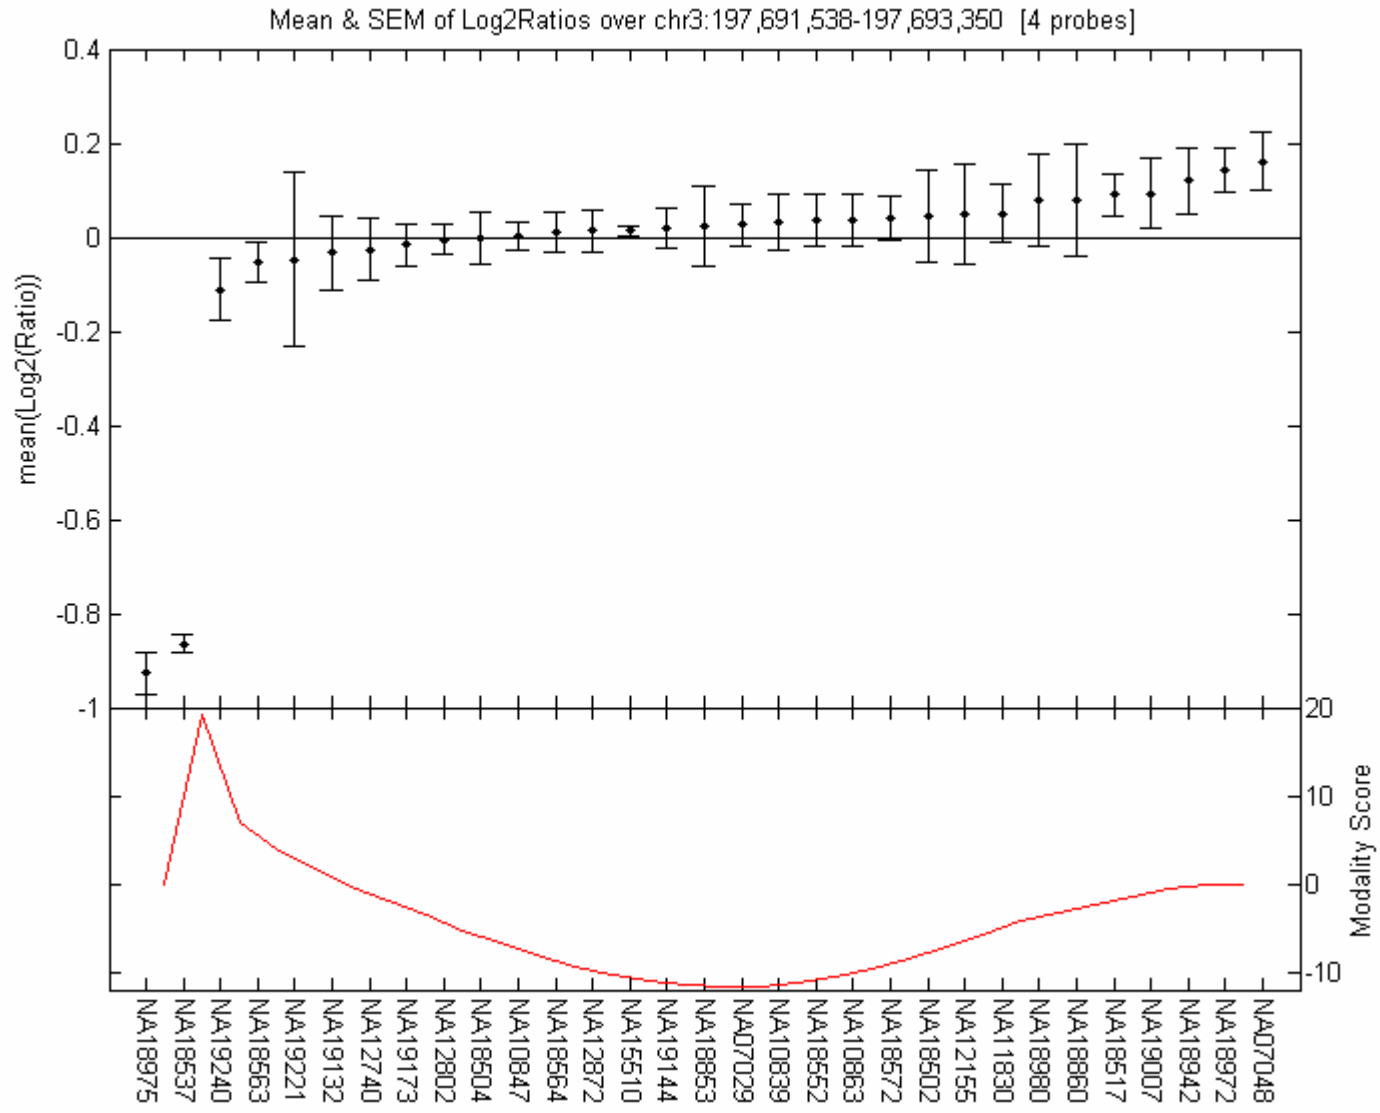

chr4:11,343,353-11,346,471 Score=18.1593

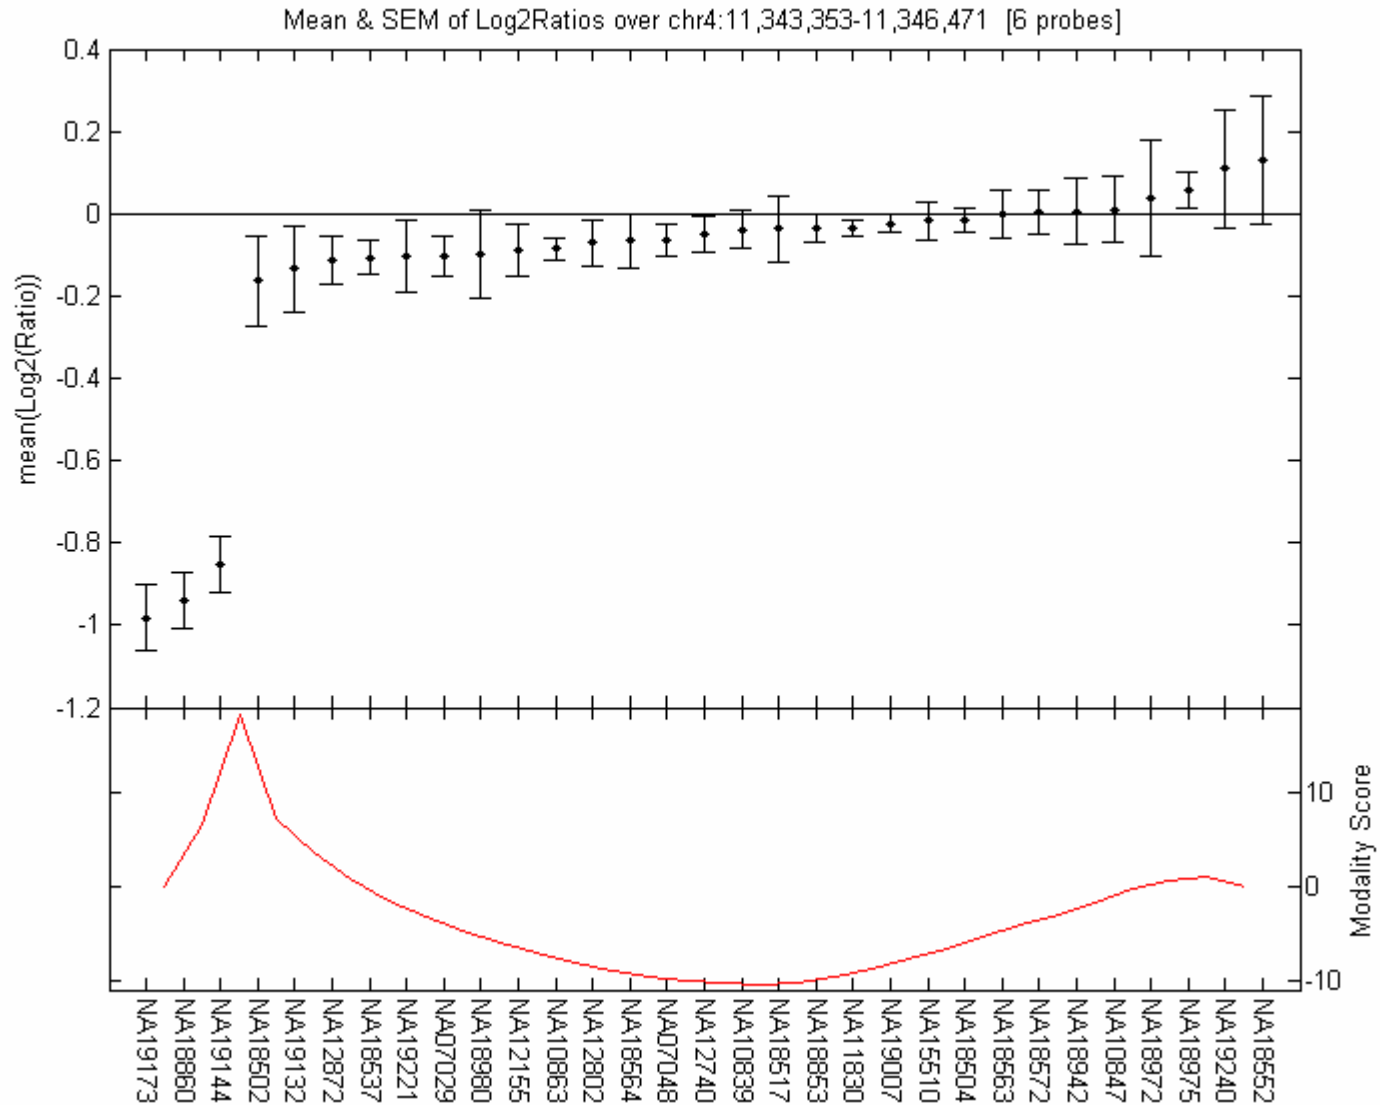

chr4:15,436,734-15,444,602 Score=19.8438

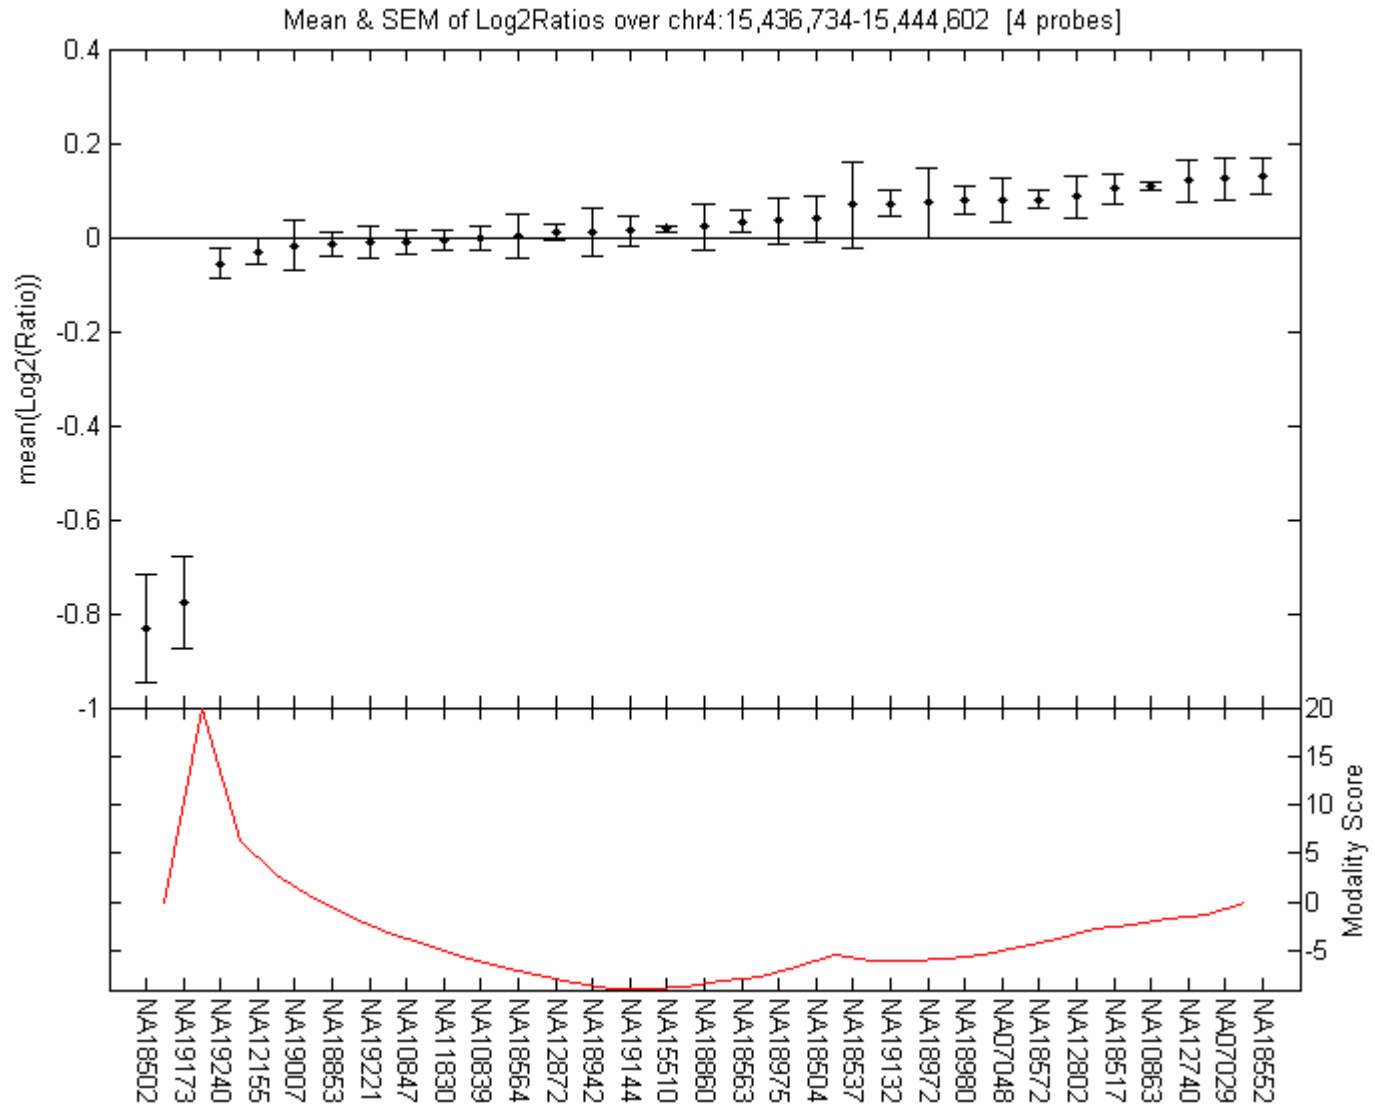

chr4:21,046,035-21,053,115 Score=16.4811

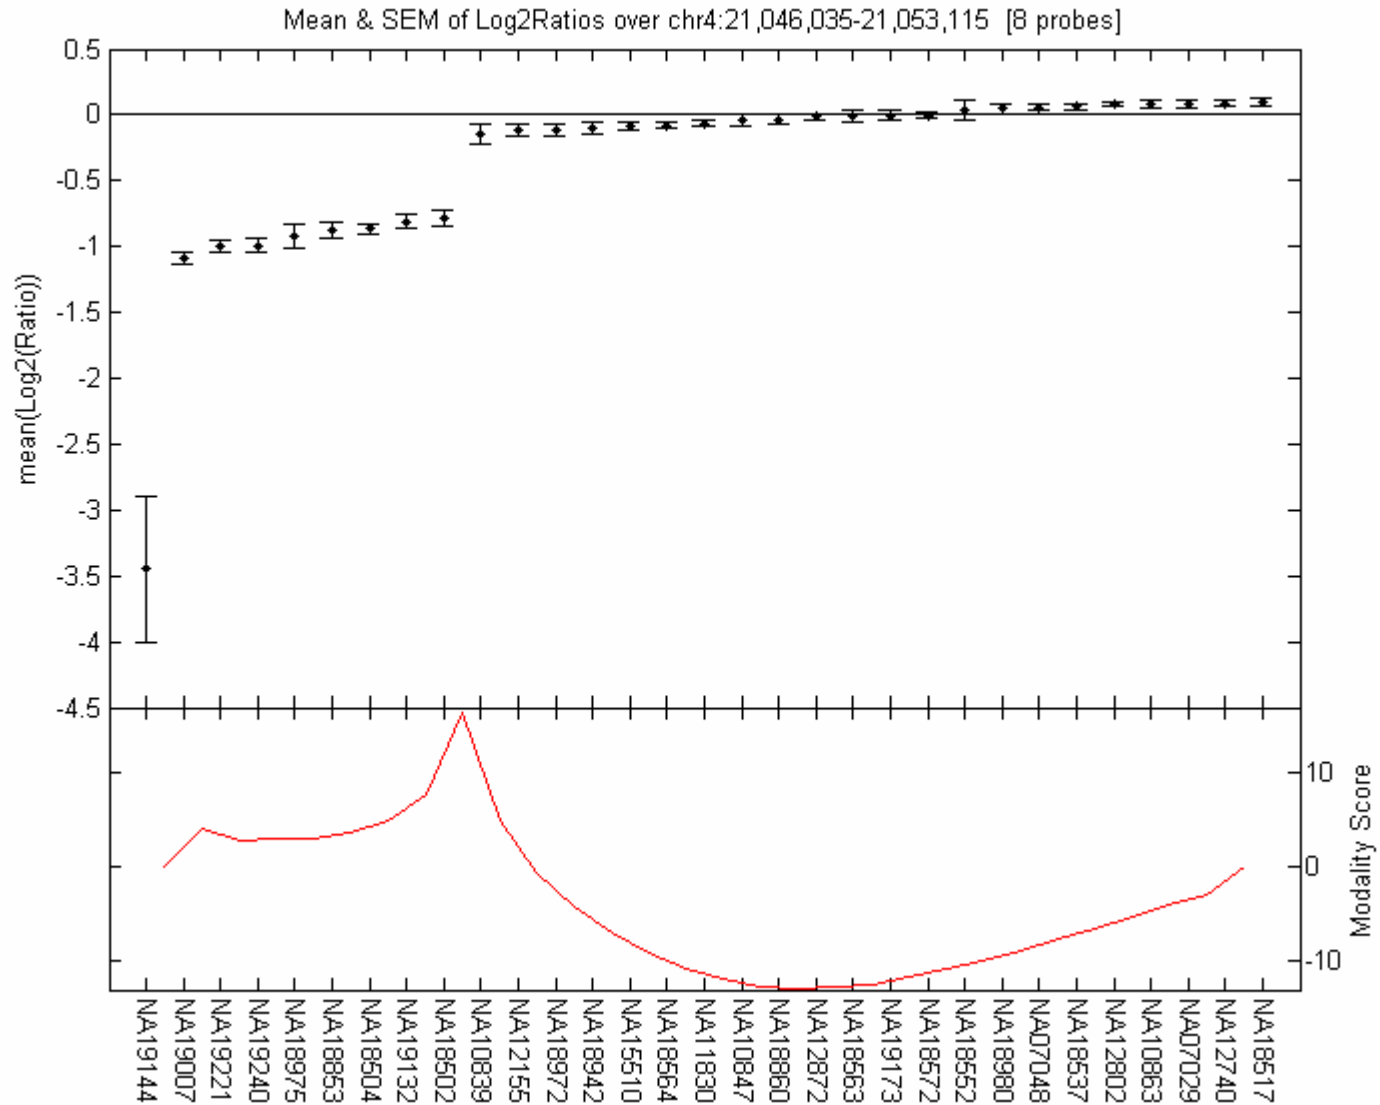



chr4:22,339,660-22,342,440 Score=13.3243

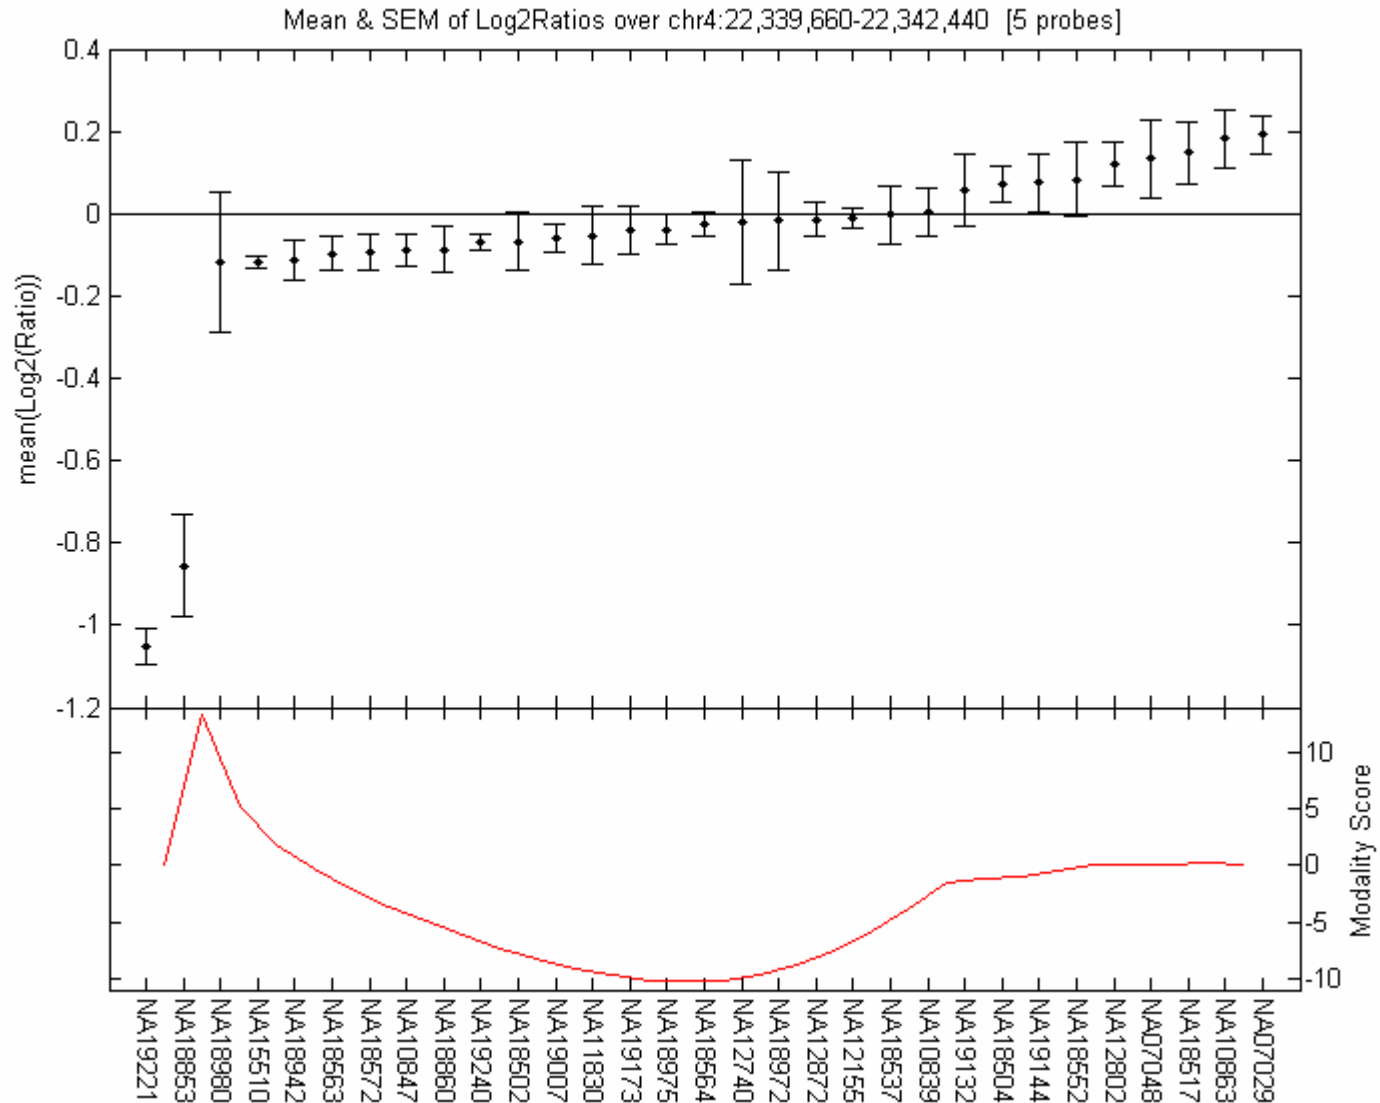

chr4:34,603,600-34,649,535 Score=20.1495

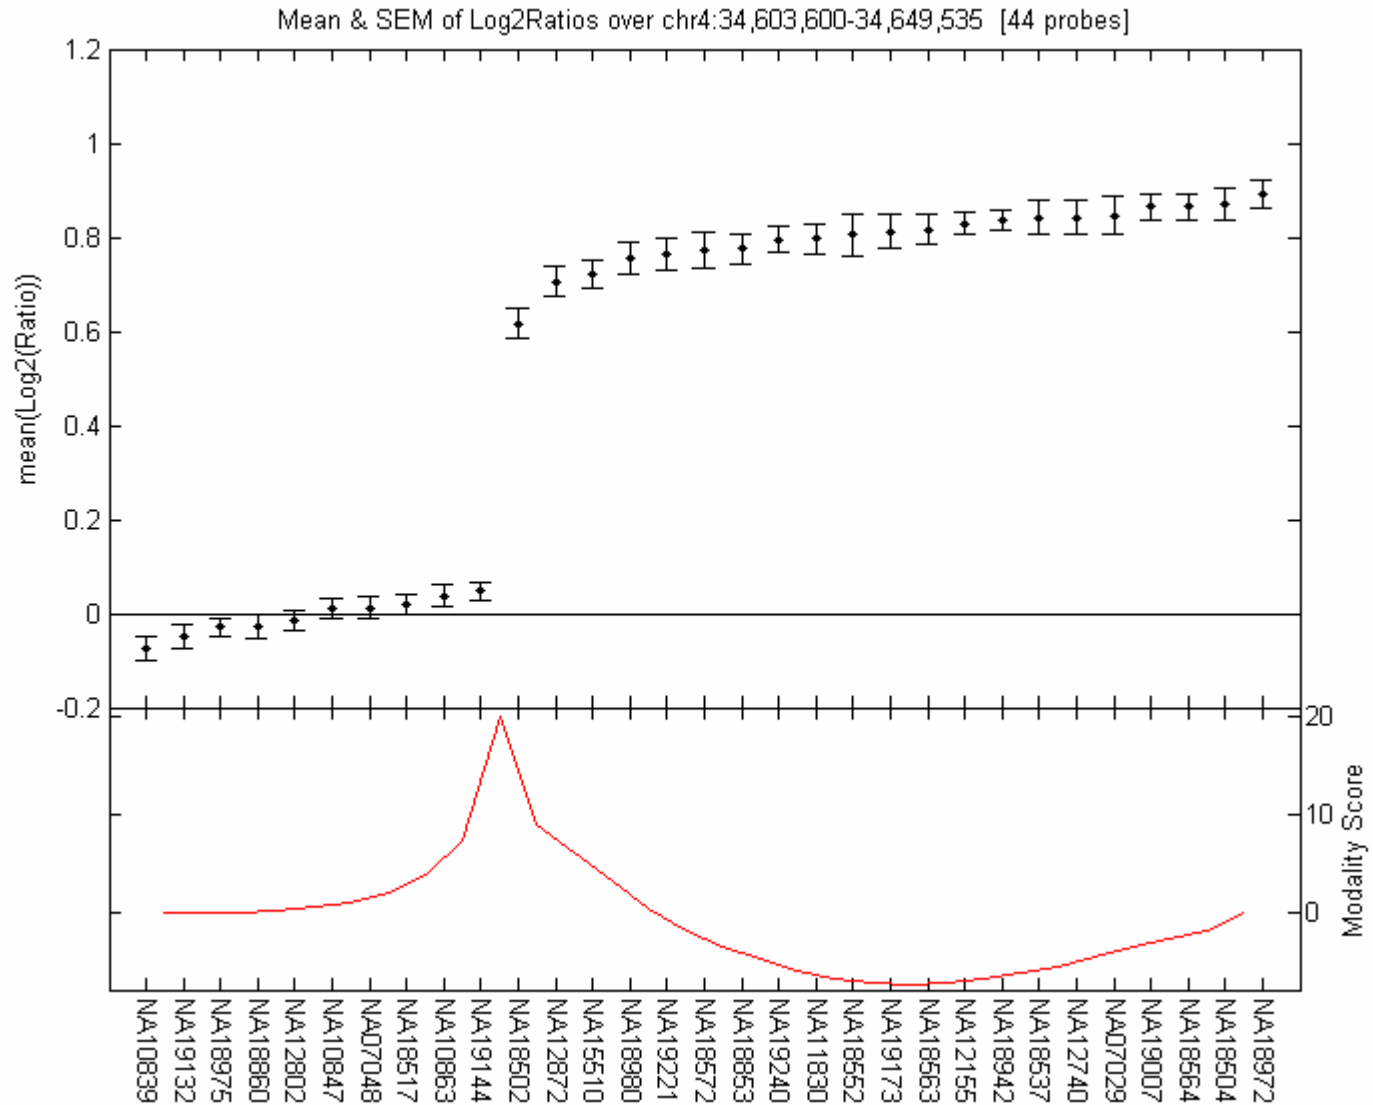

chr4:57,381,537-57,384,913 Score=15.8339

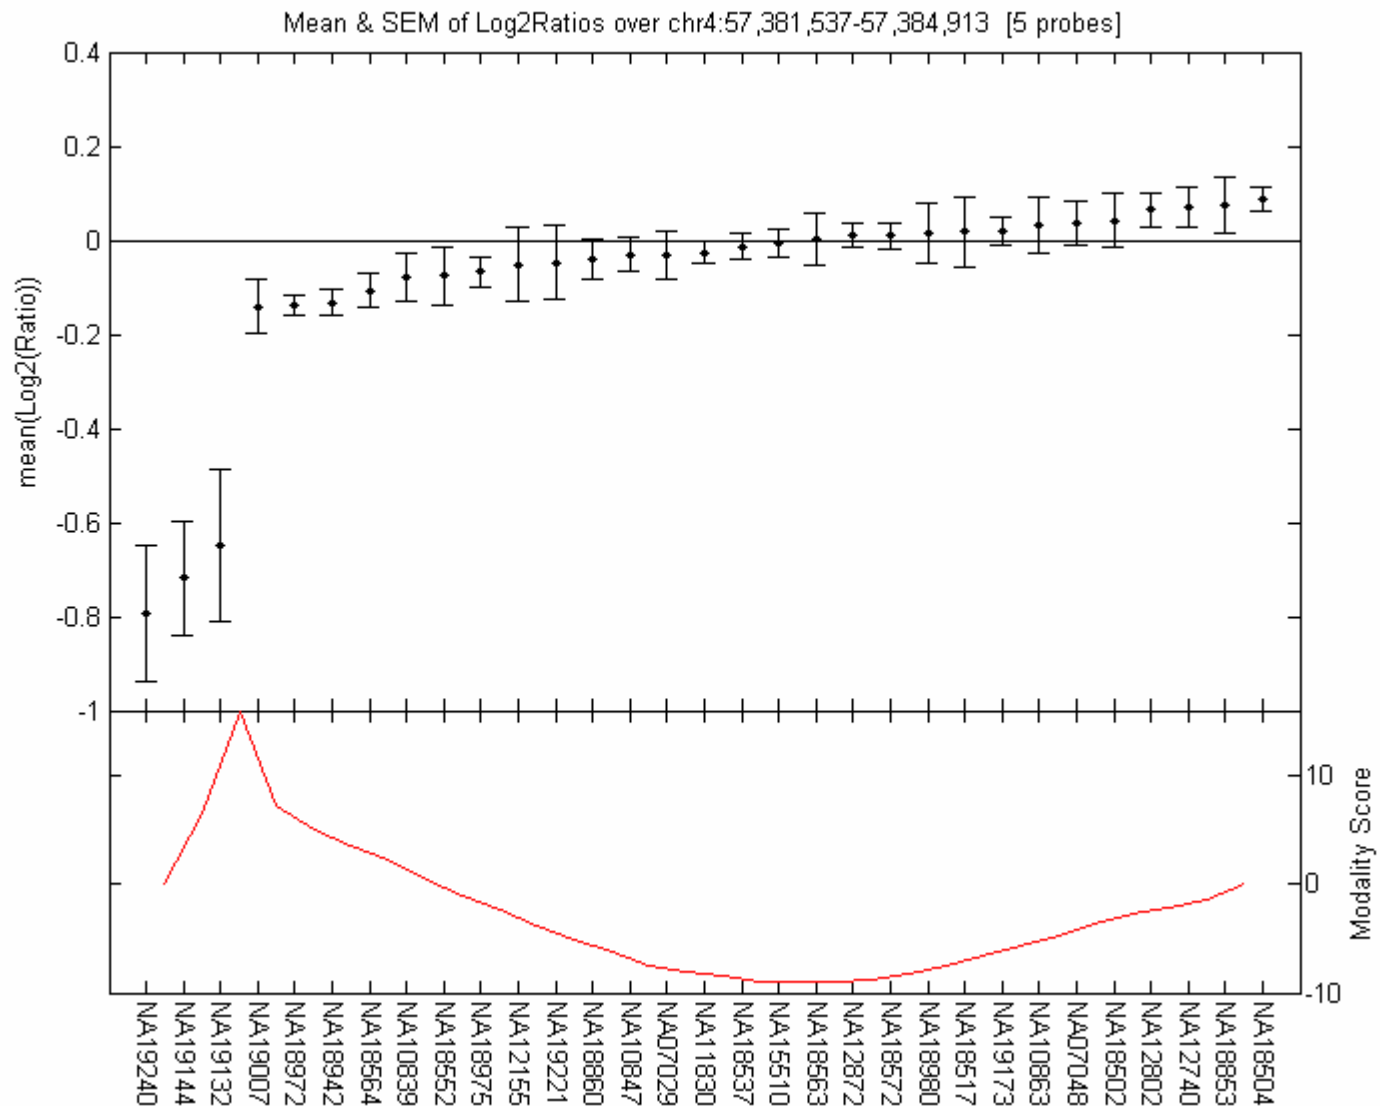

chr4:63,503,440-63,504,639 Score=14.6204

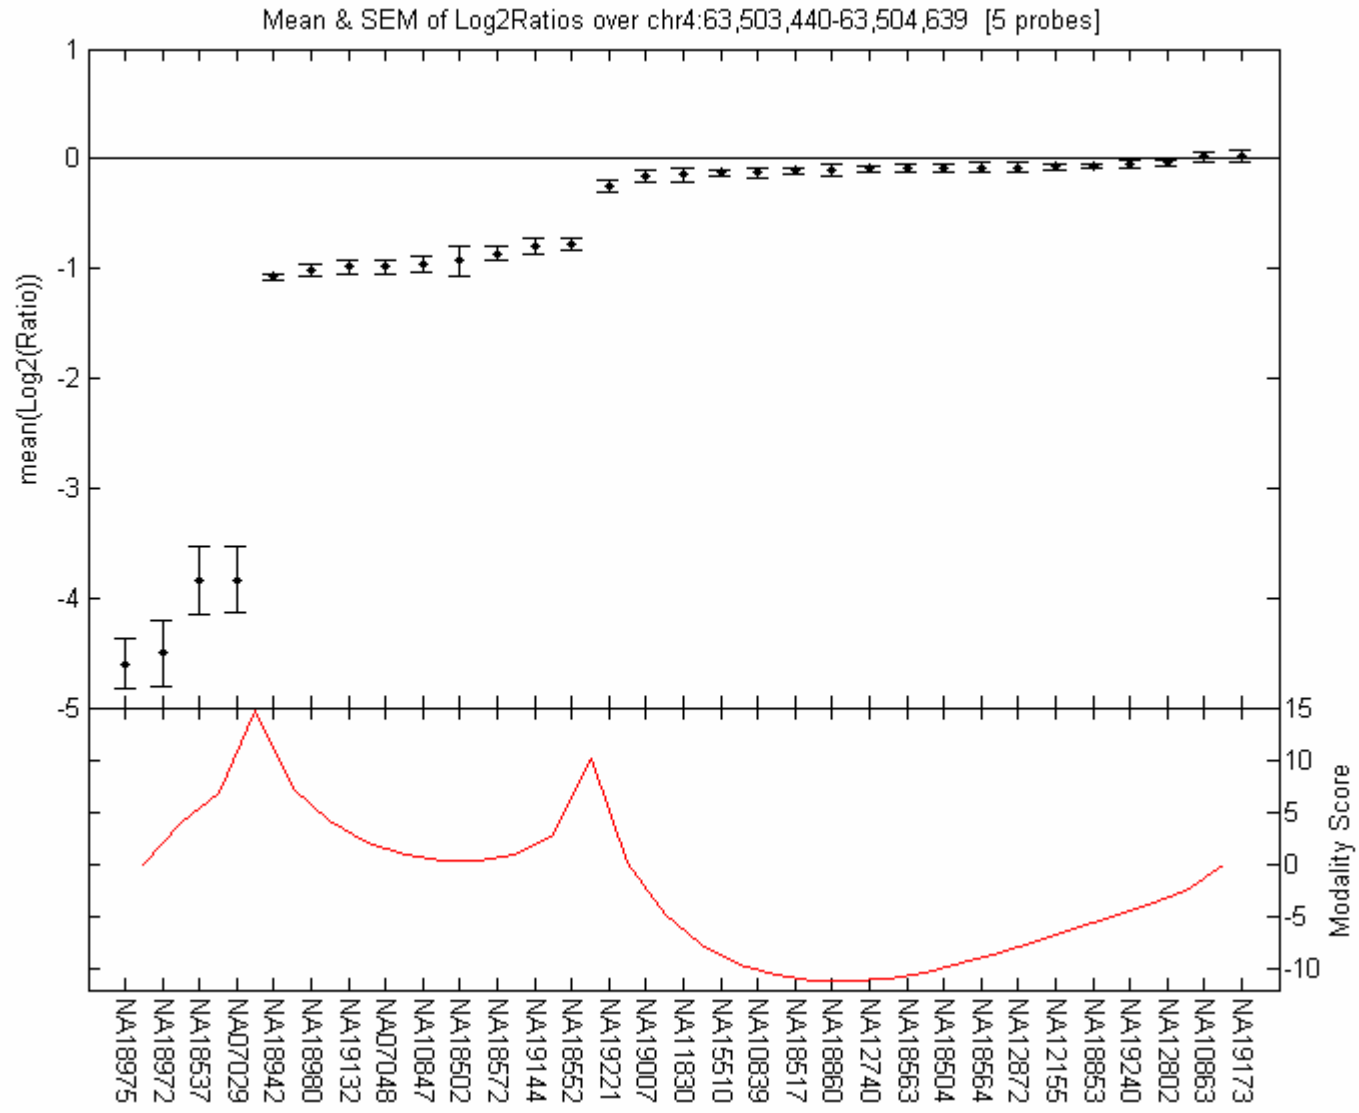

chr4:87,333,758-87,337,055 Score=15.0452

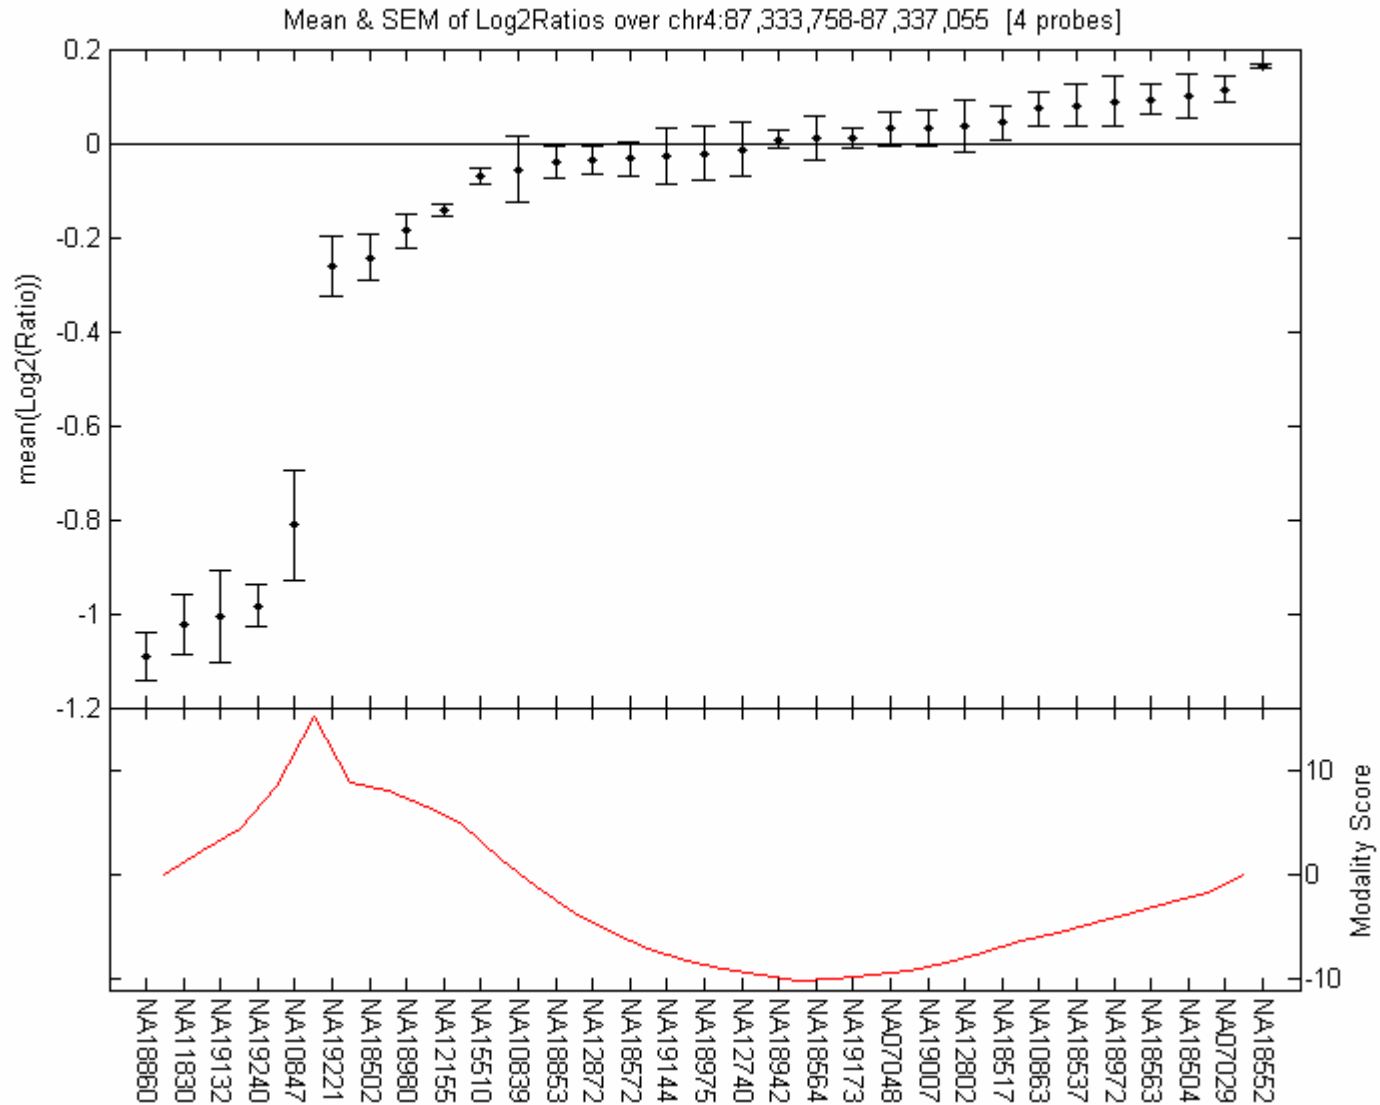

chr4:104,136,782-104,140,815 Score=10.9325

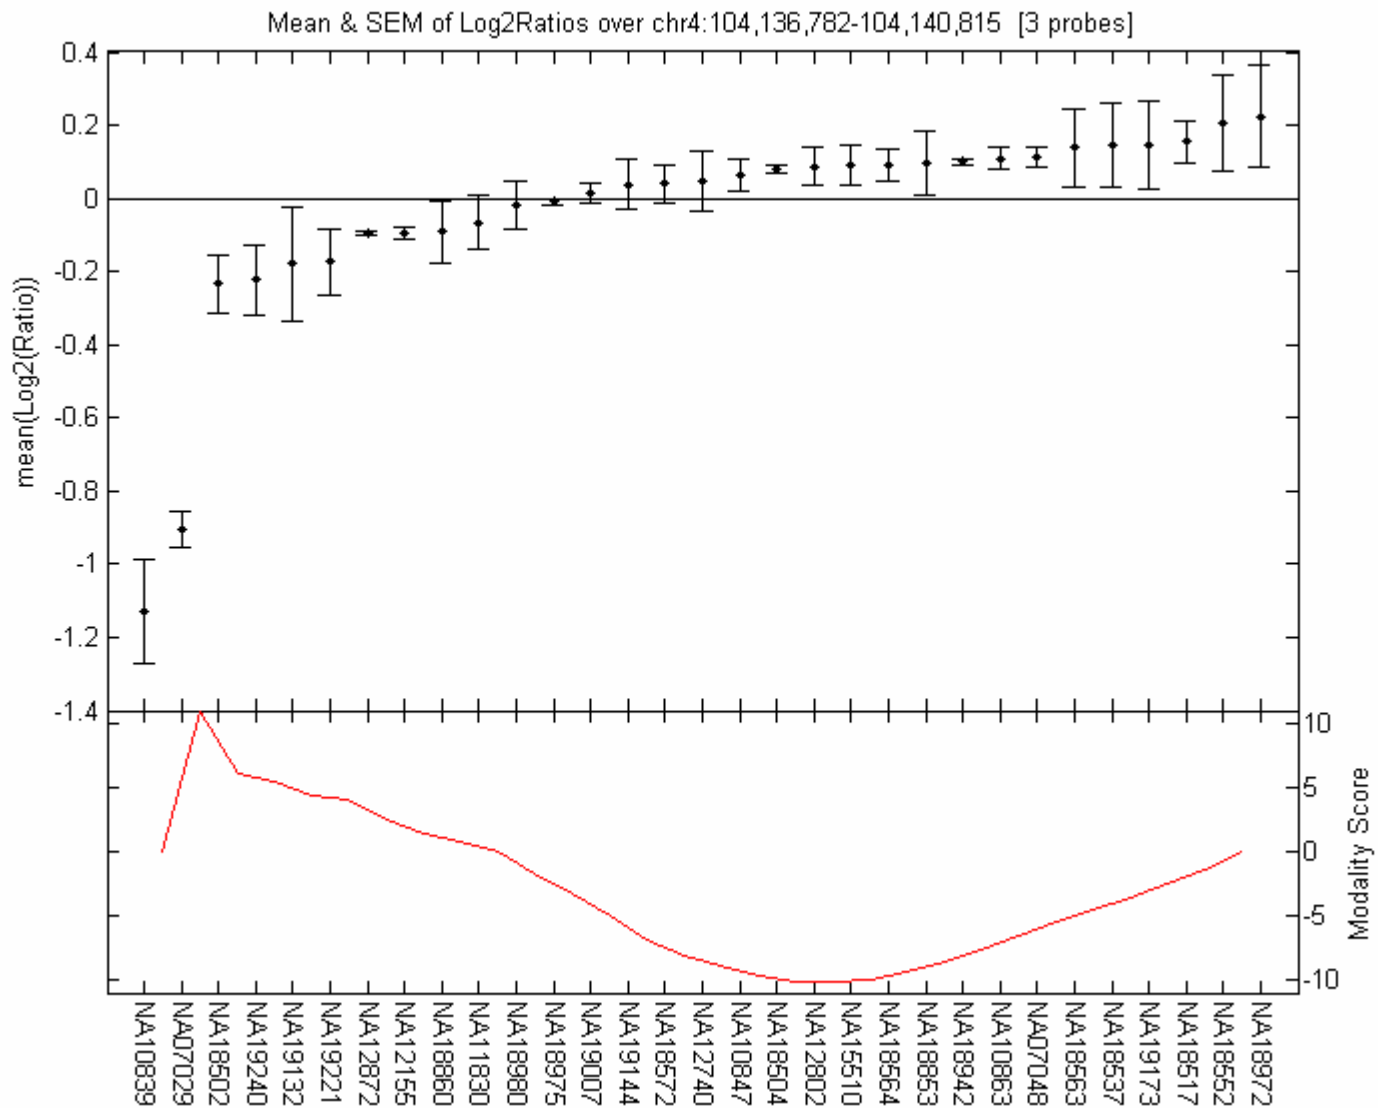

chr4:115,537,276-115,539,984 Score=15.0431

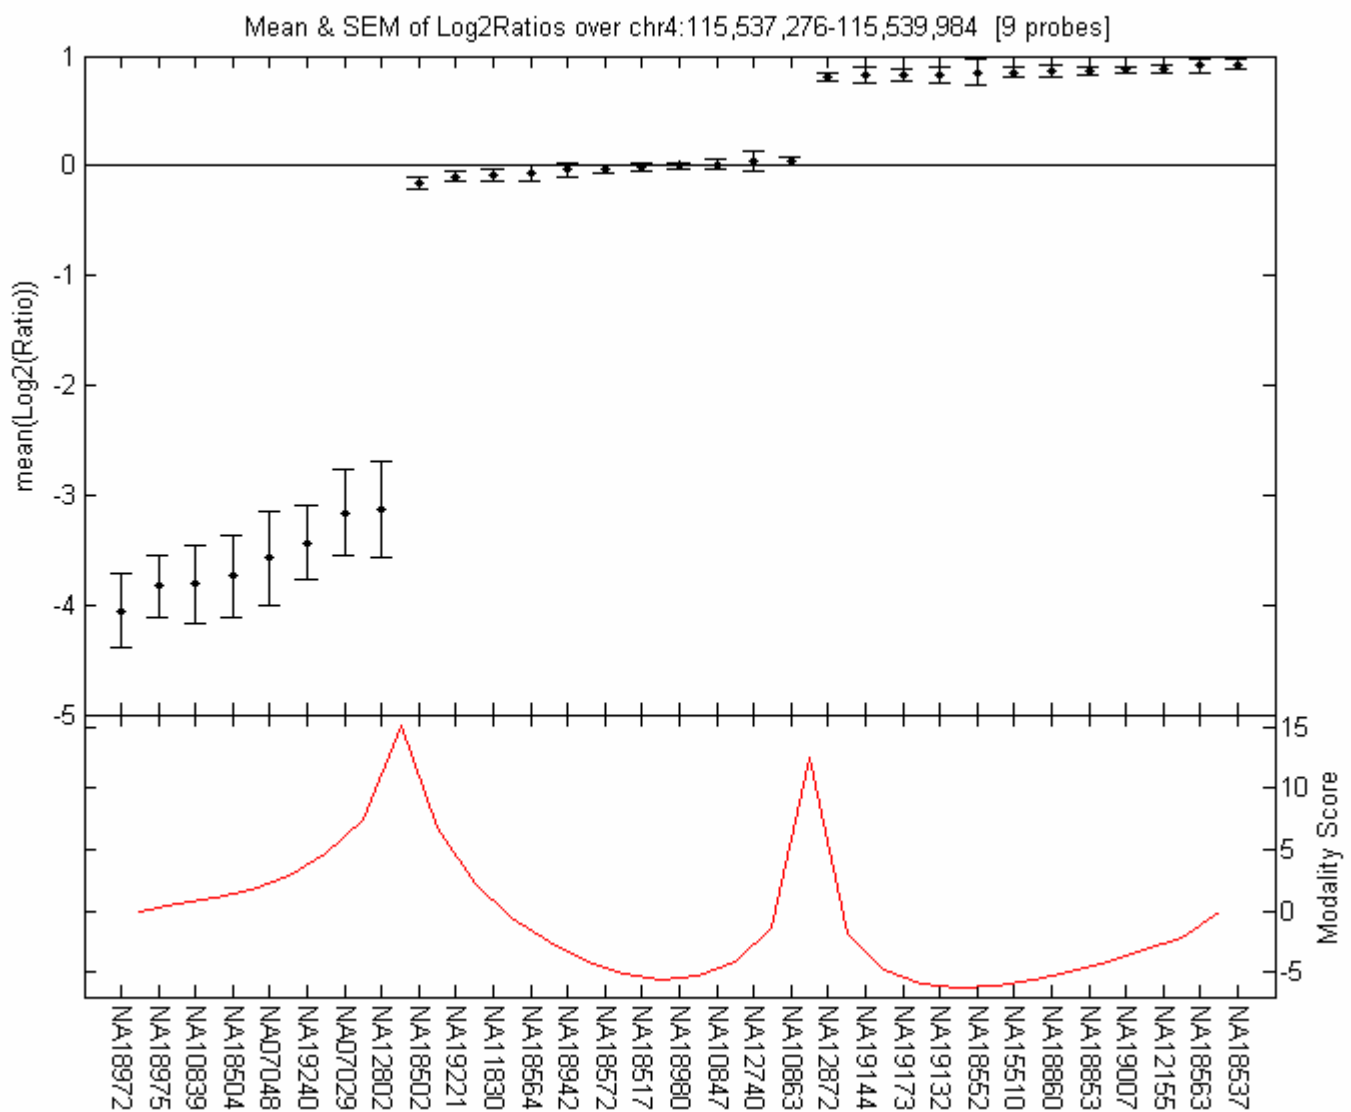

chr4:115,865,494-115,866,415 Score=12.4051

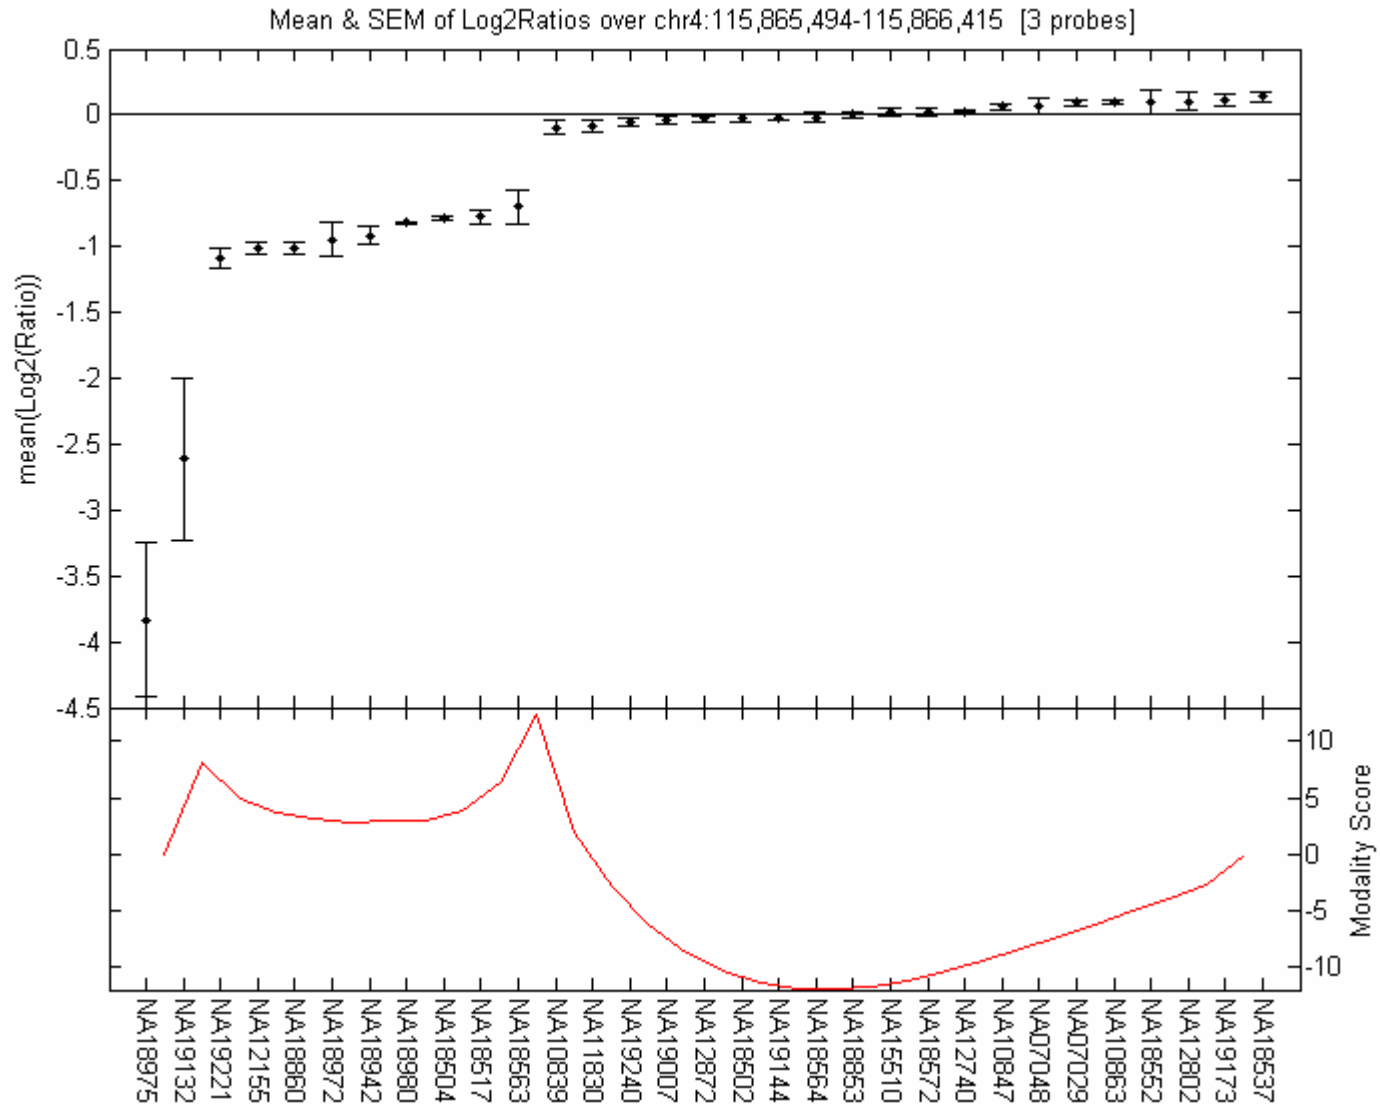



chr4:116,524,798-116,534,384 Score=17.9551

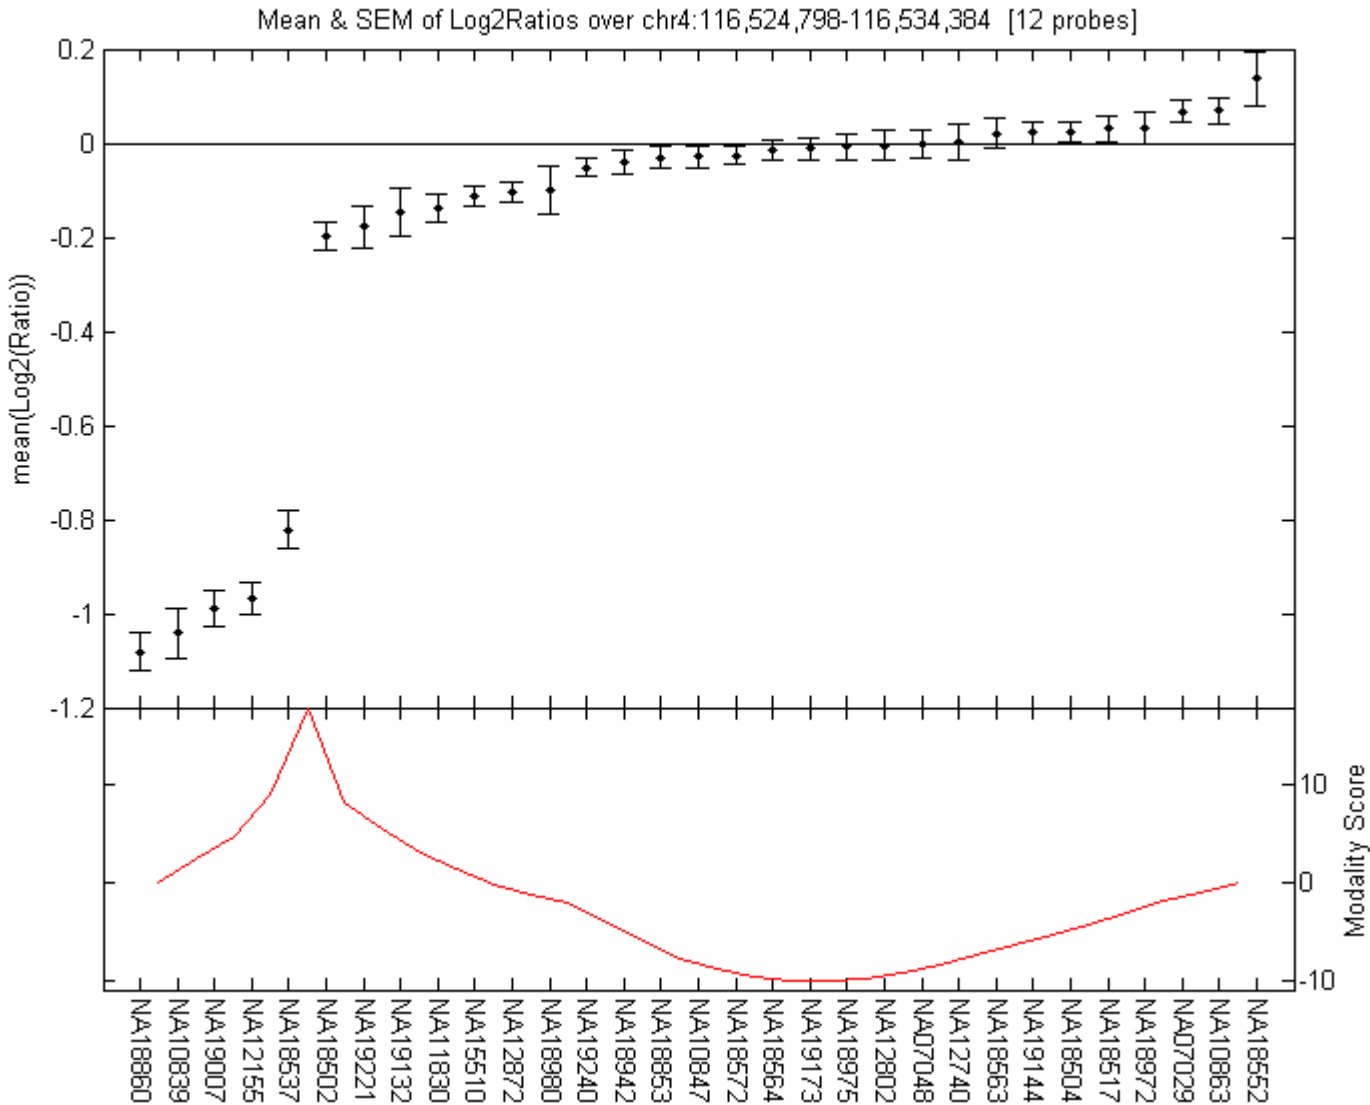

chr4:119,483,886-119,487,418 Score=24.1662

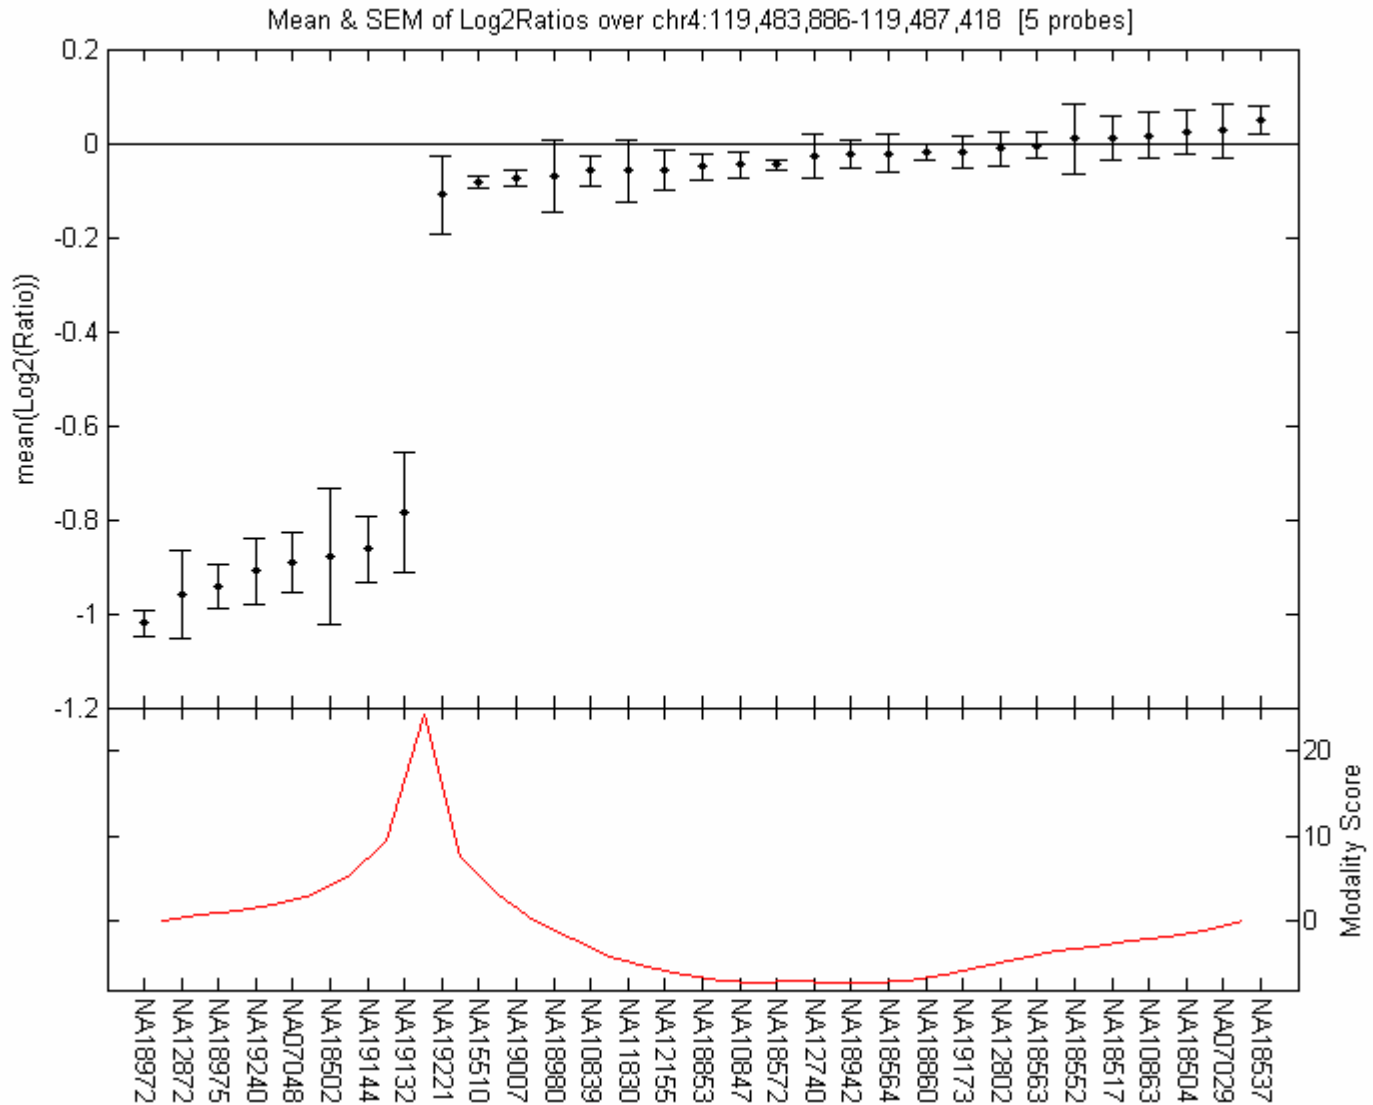

chr4:122,640,555-122,647,404 Score=18.9898

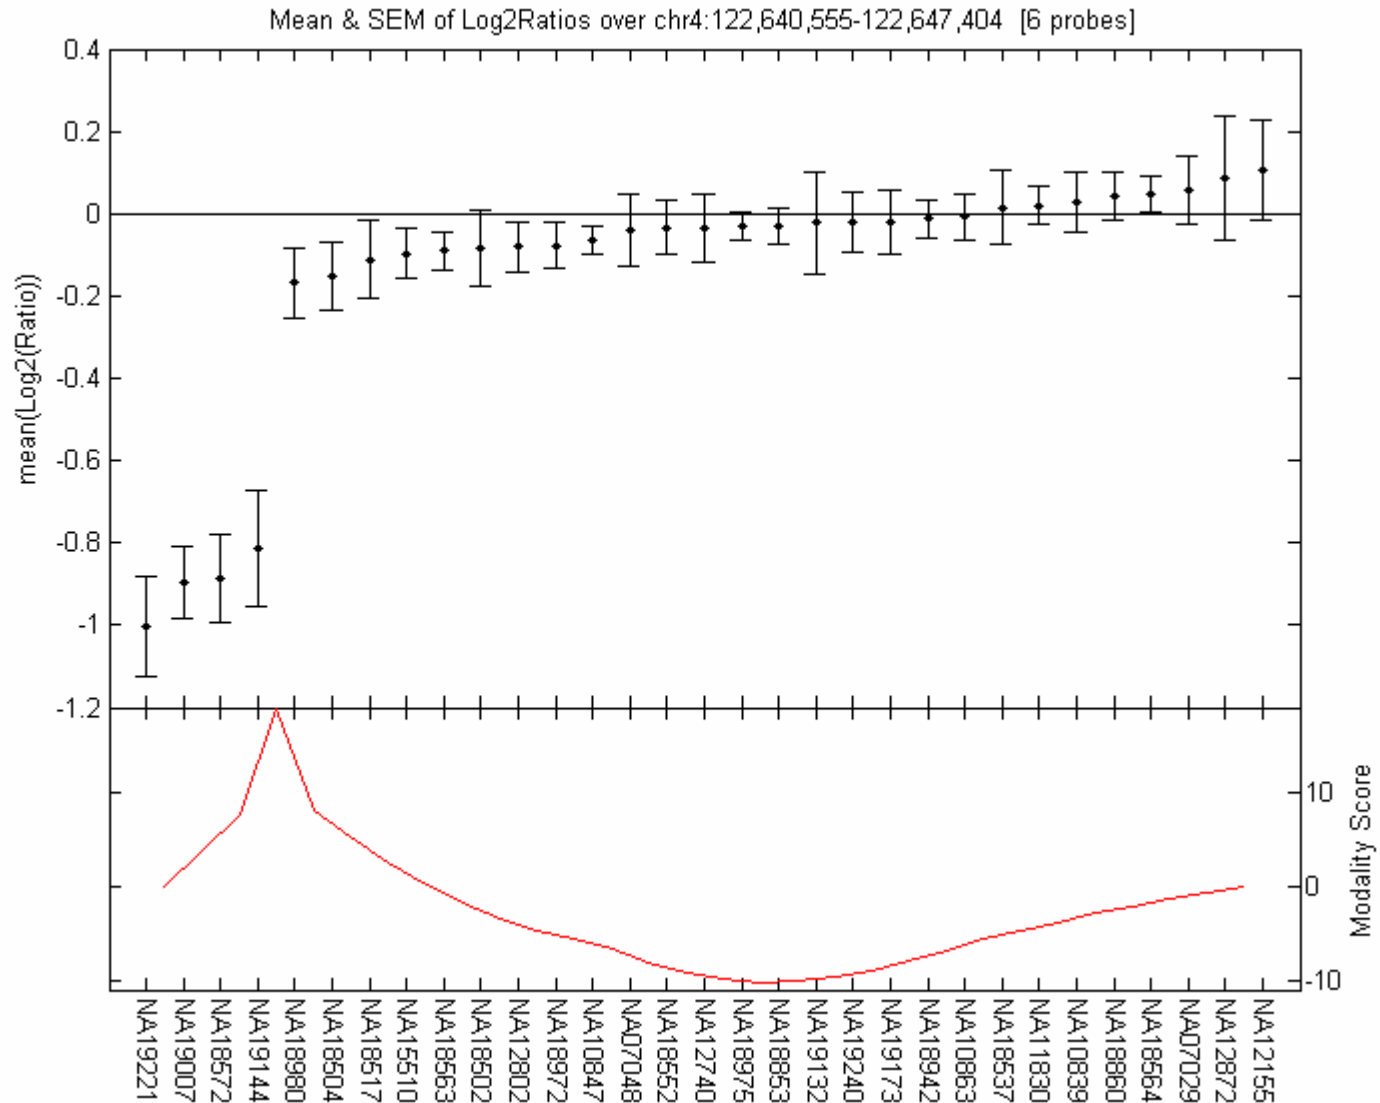

chr4:132,848,862-132,851,018 Score=18.167

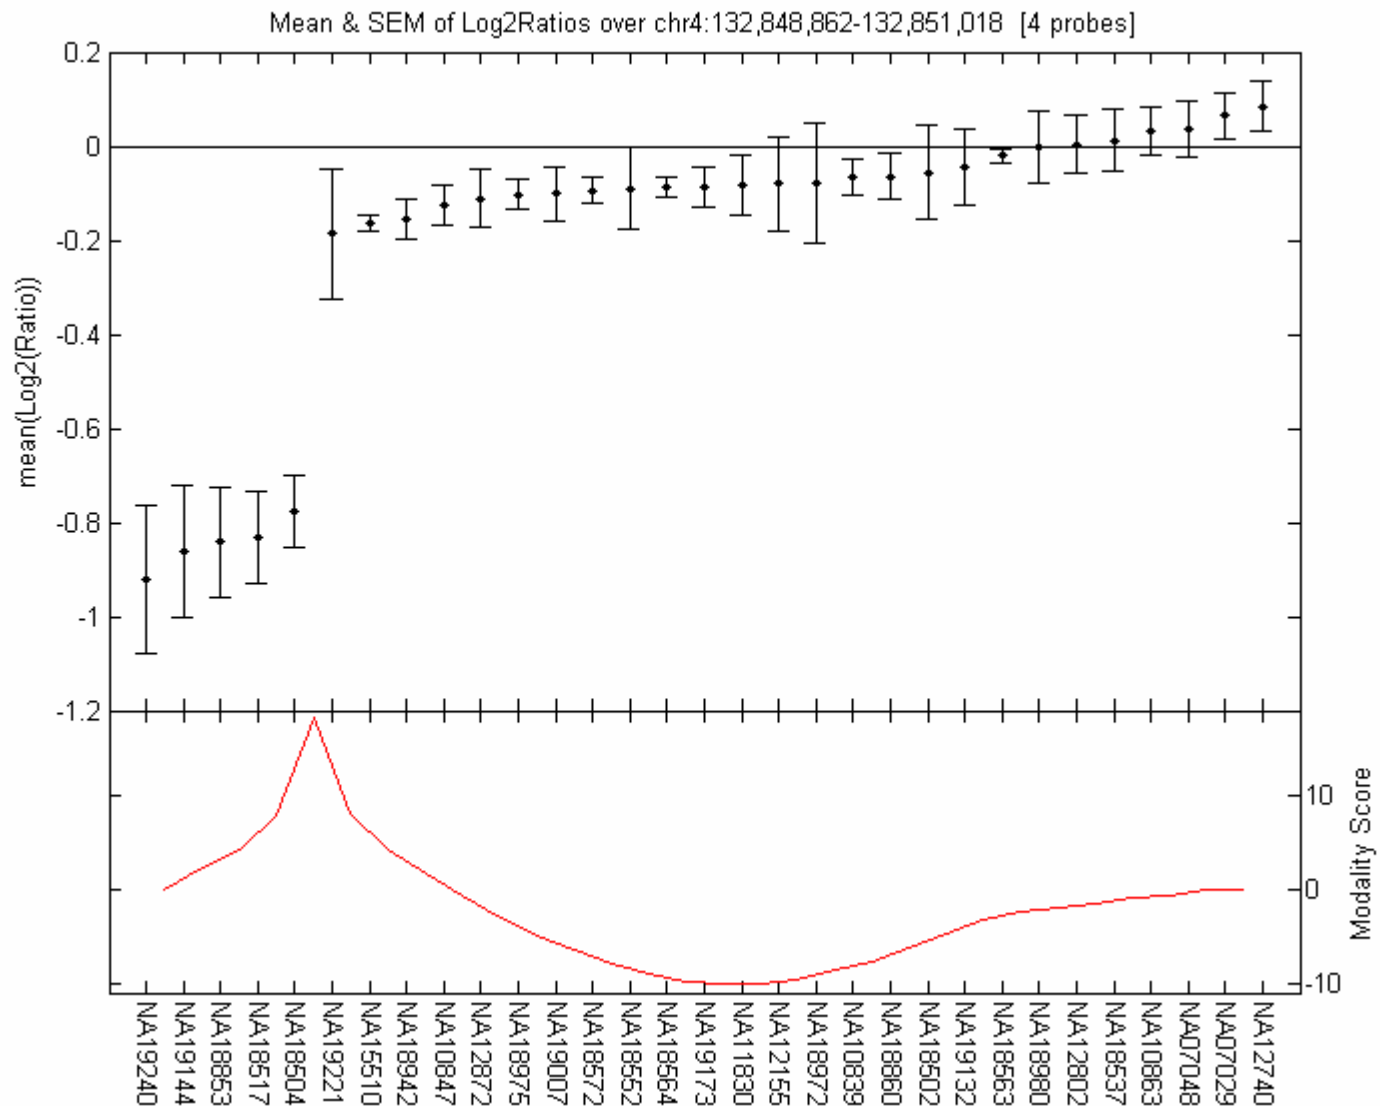

chr4:133,539,258-133,540,462 Score=10.5596

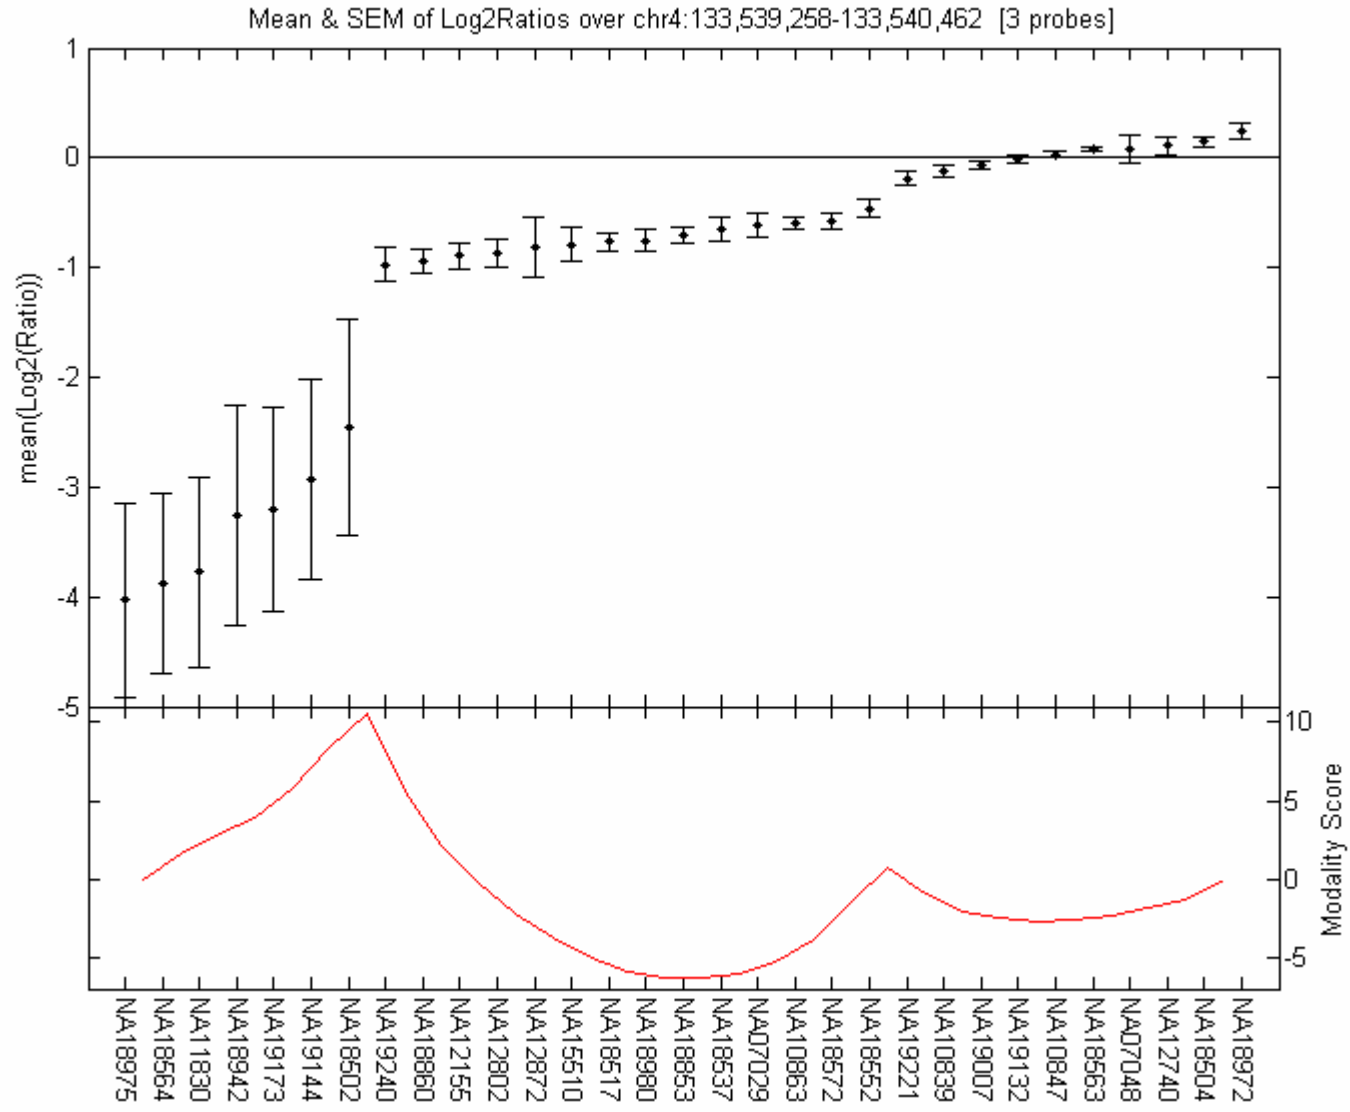

chr4:138,450,130-138,458,291 Score=21.3368

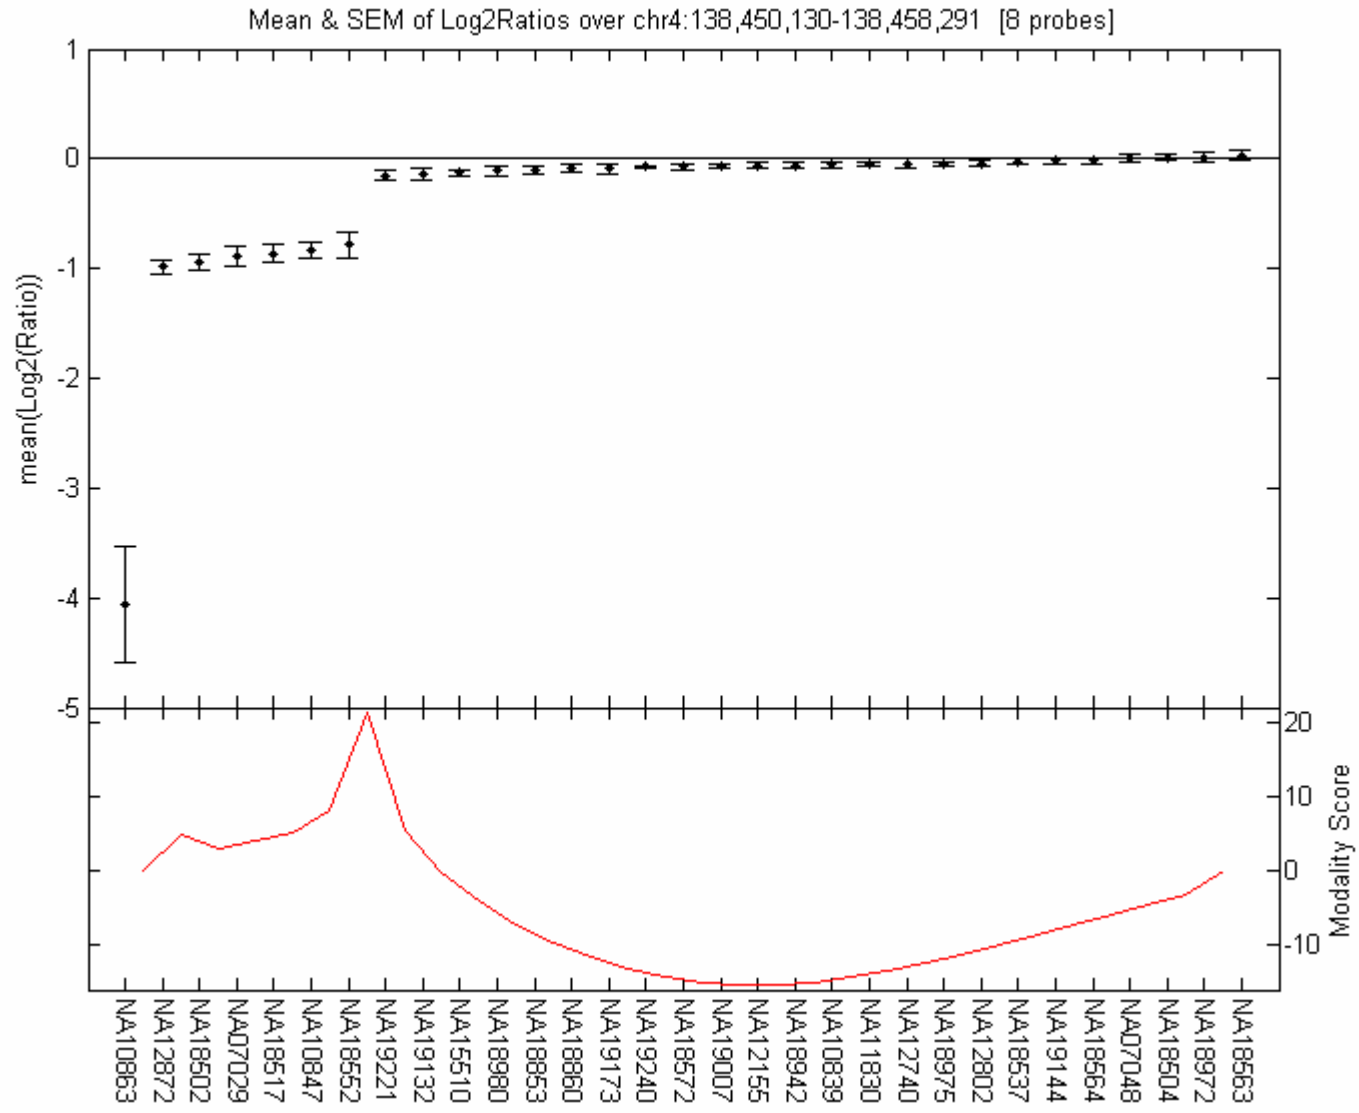

chr4:142,588,498-142,590,303 Score=10.2962

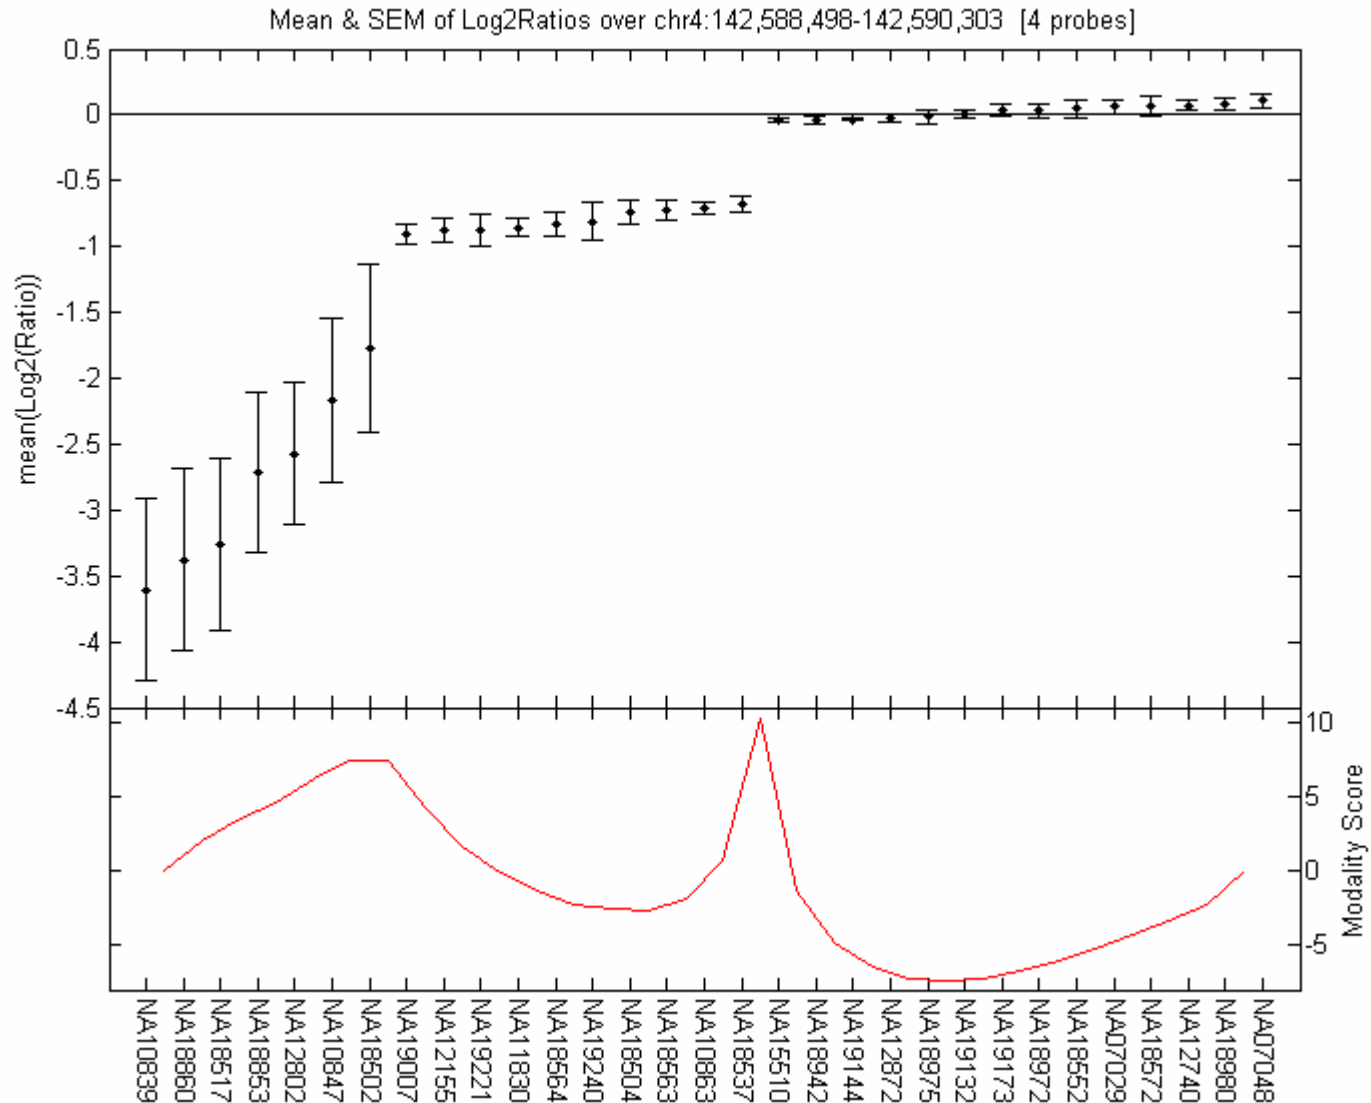

chr4:152,239,563-152,241,354 Score=19.9496

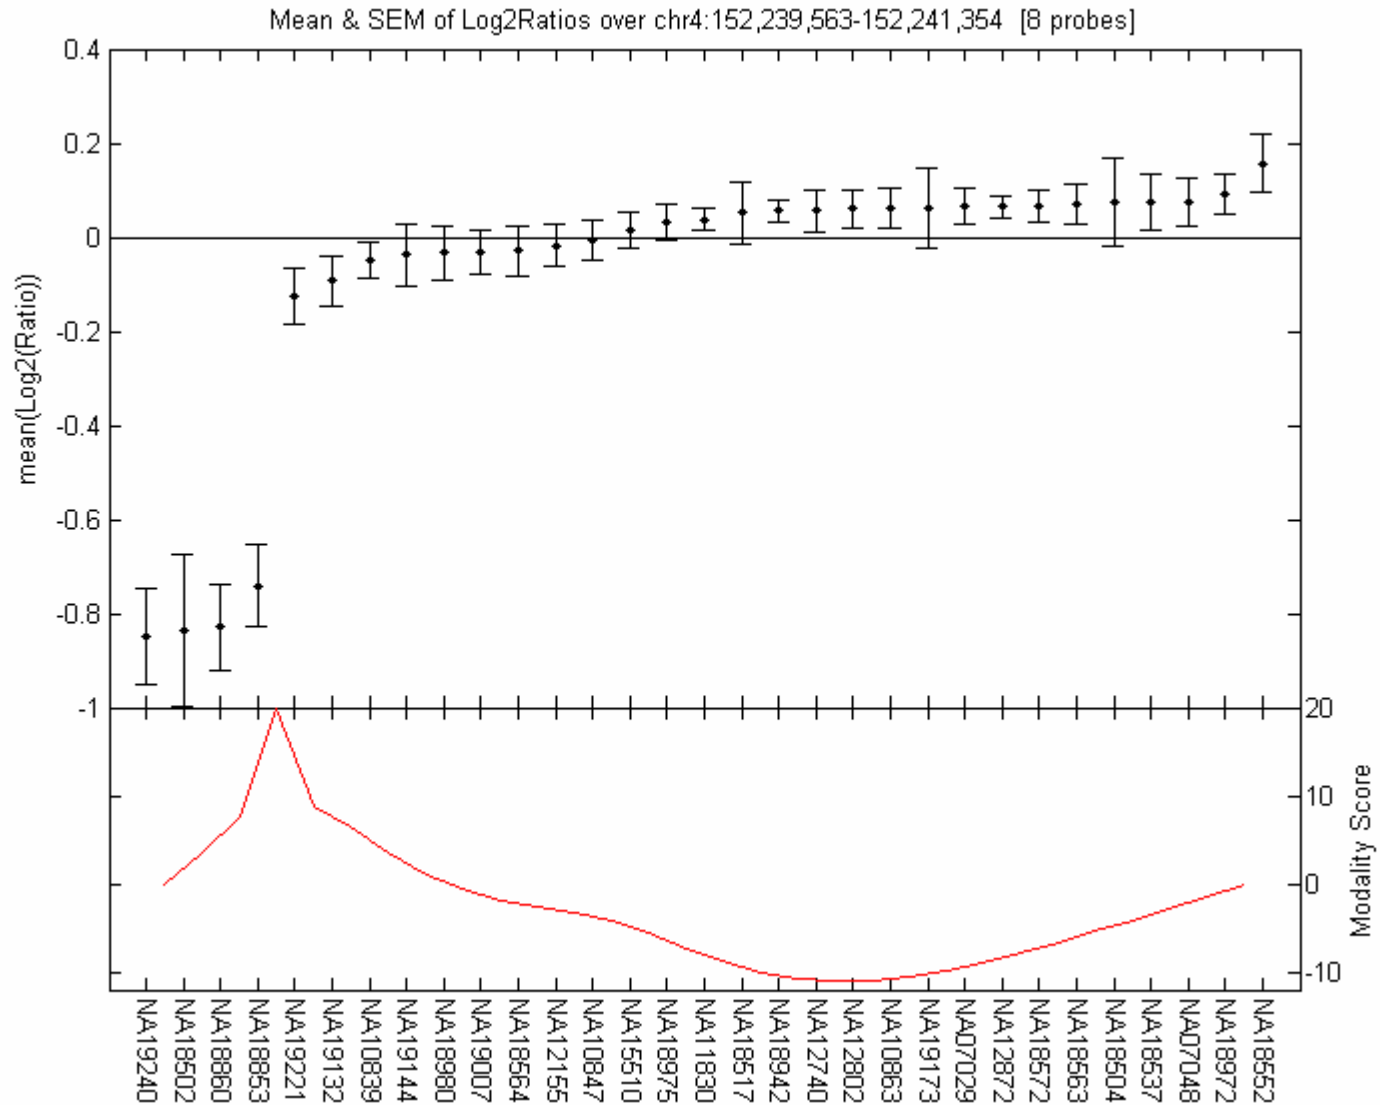



chr4:153,147,995-153,151,358 Score=23.0927

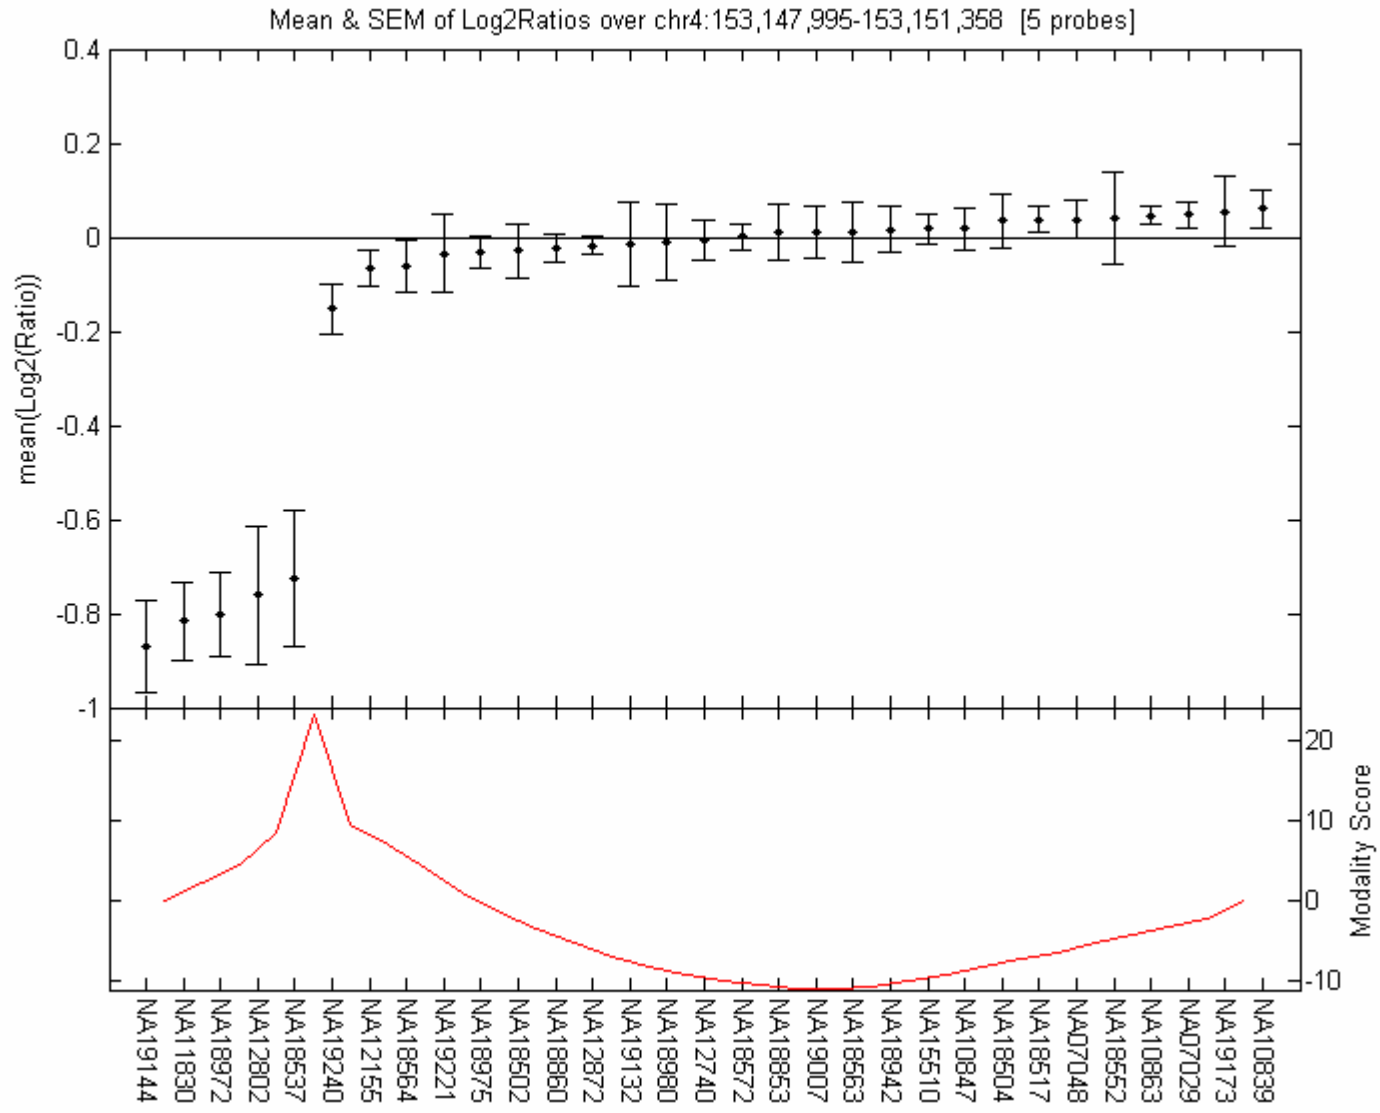

chr4:157,321,006-157,331,168 Score=14.8187

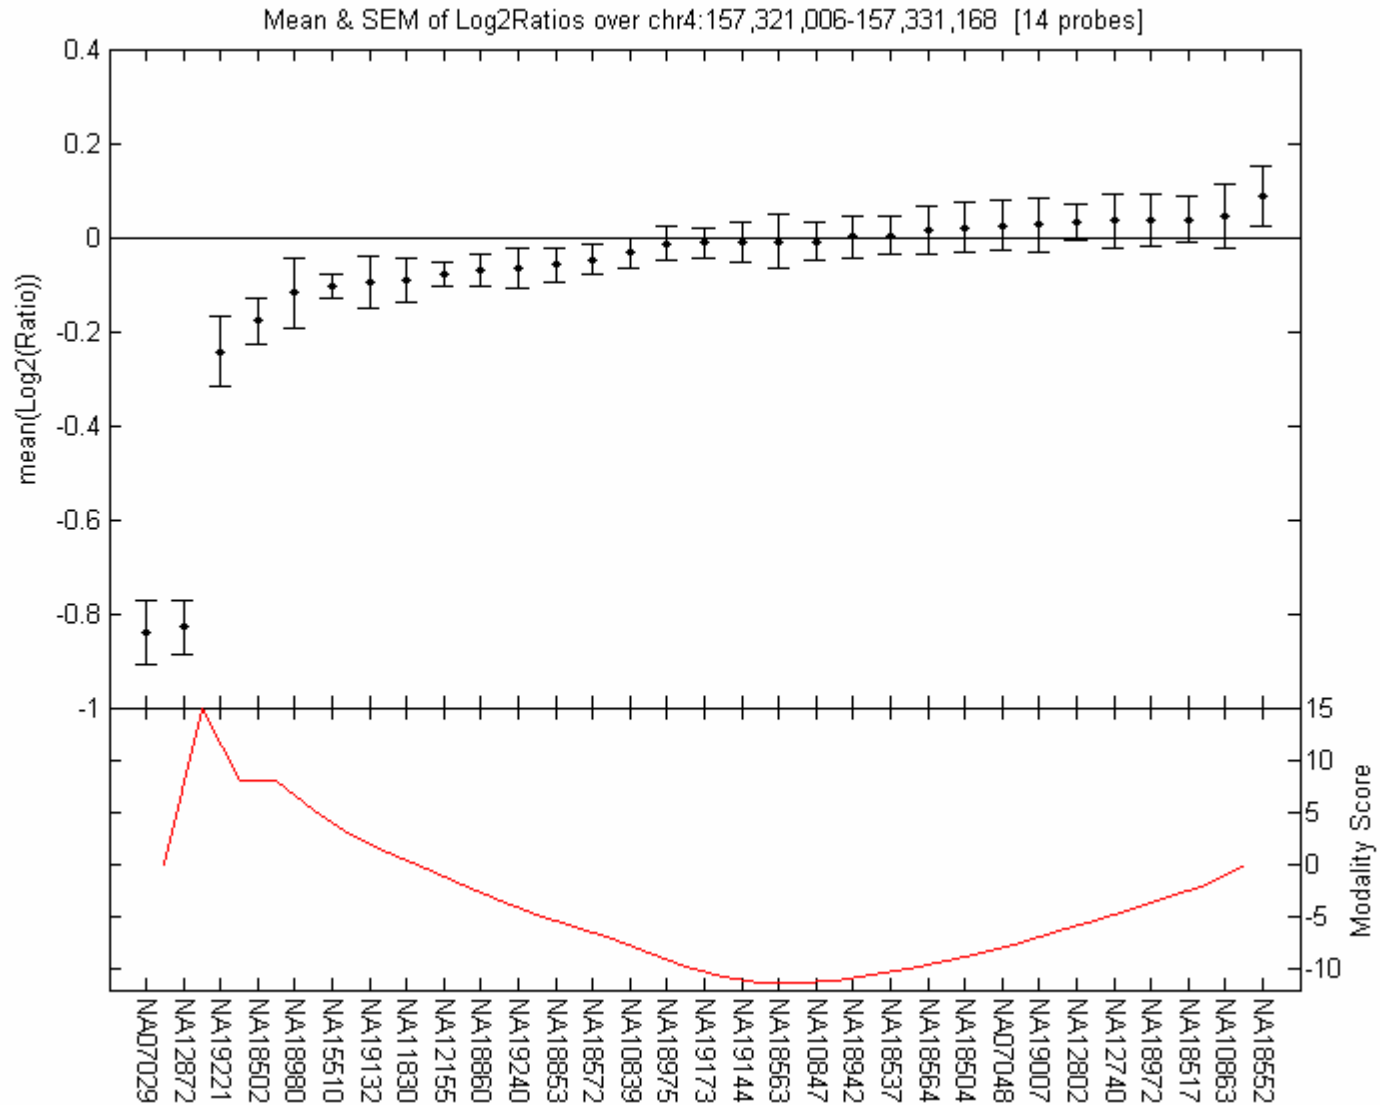

chr4:161,371,632-161,376,564 Score=28.7299

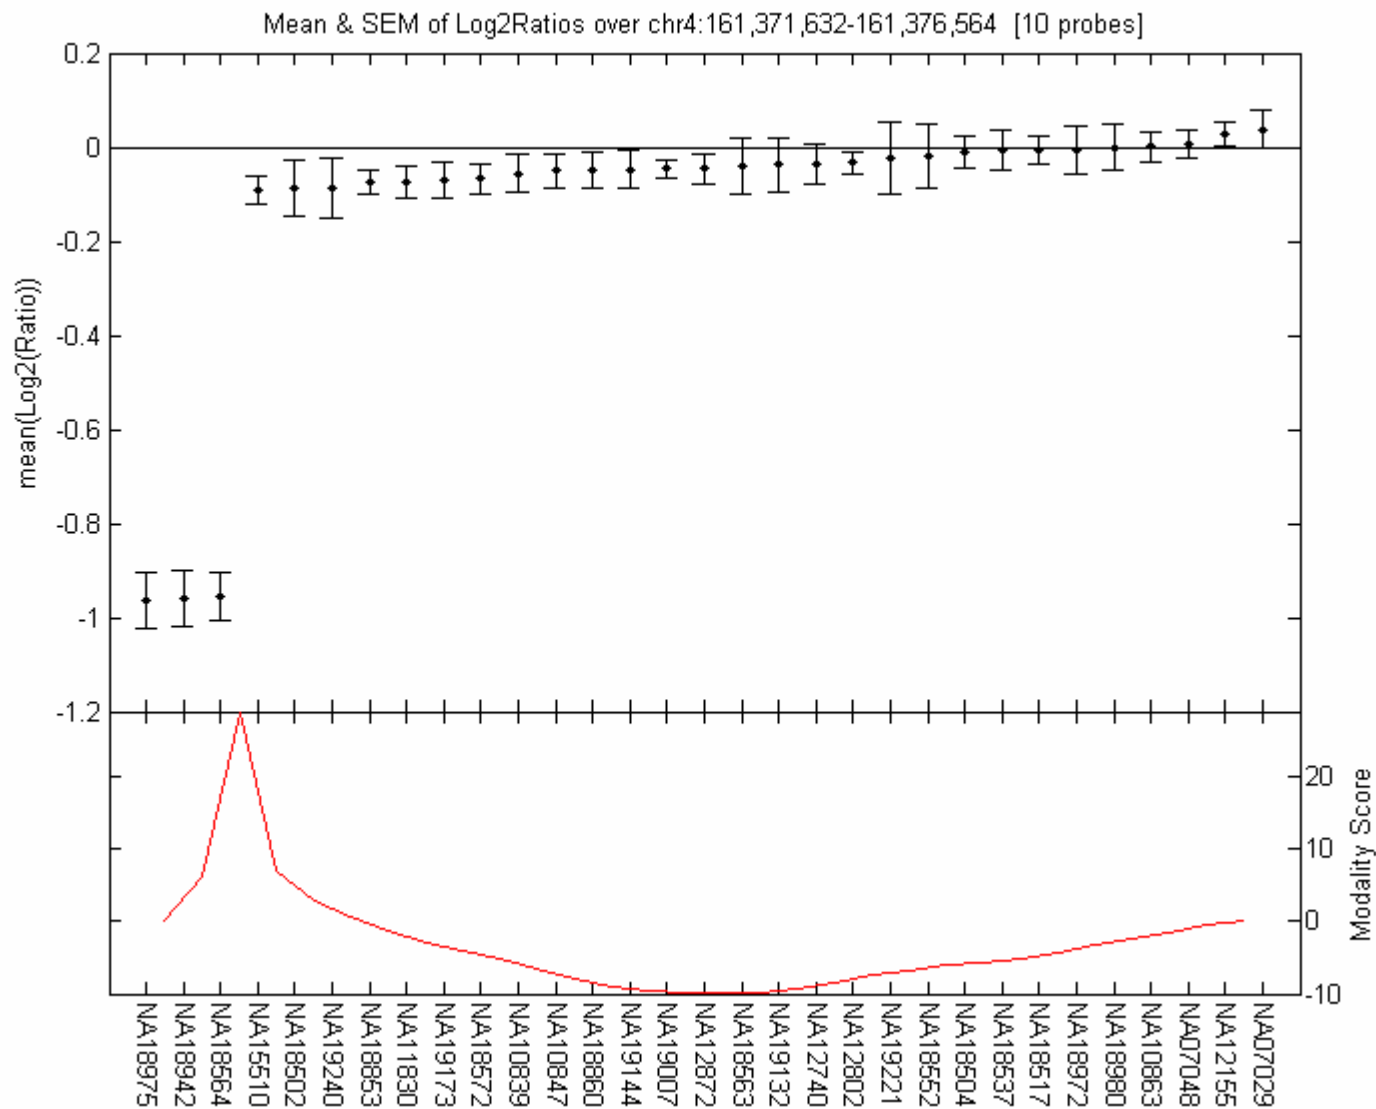

chr4:162,807,204-162,808,734 Score=11.6825

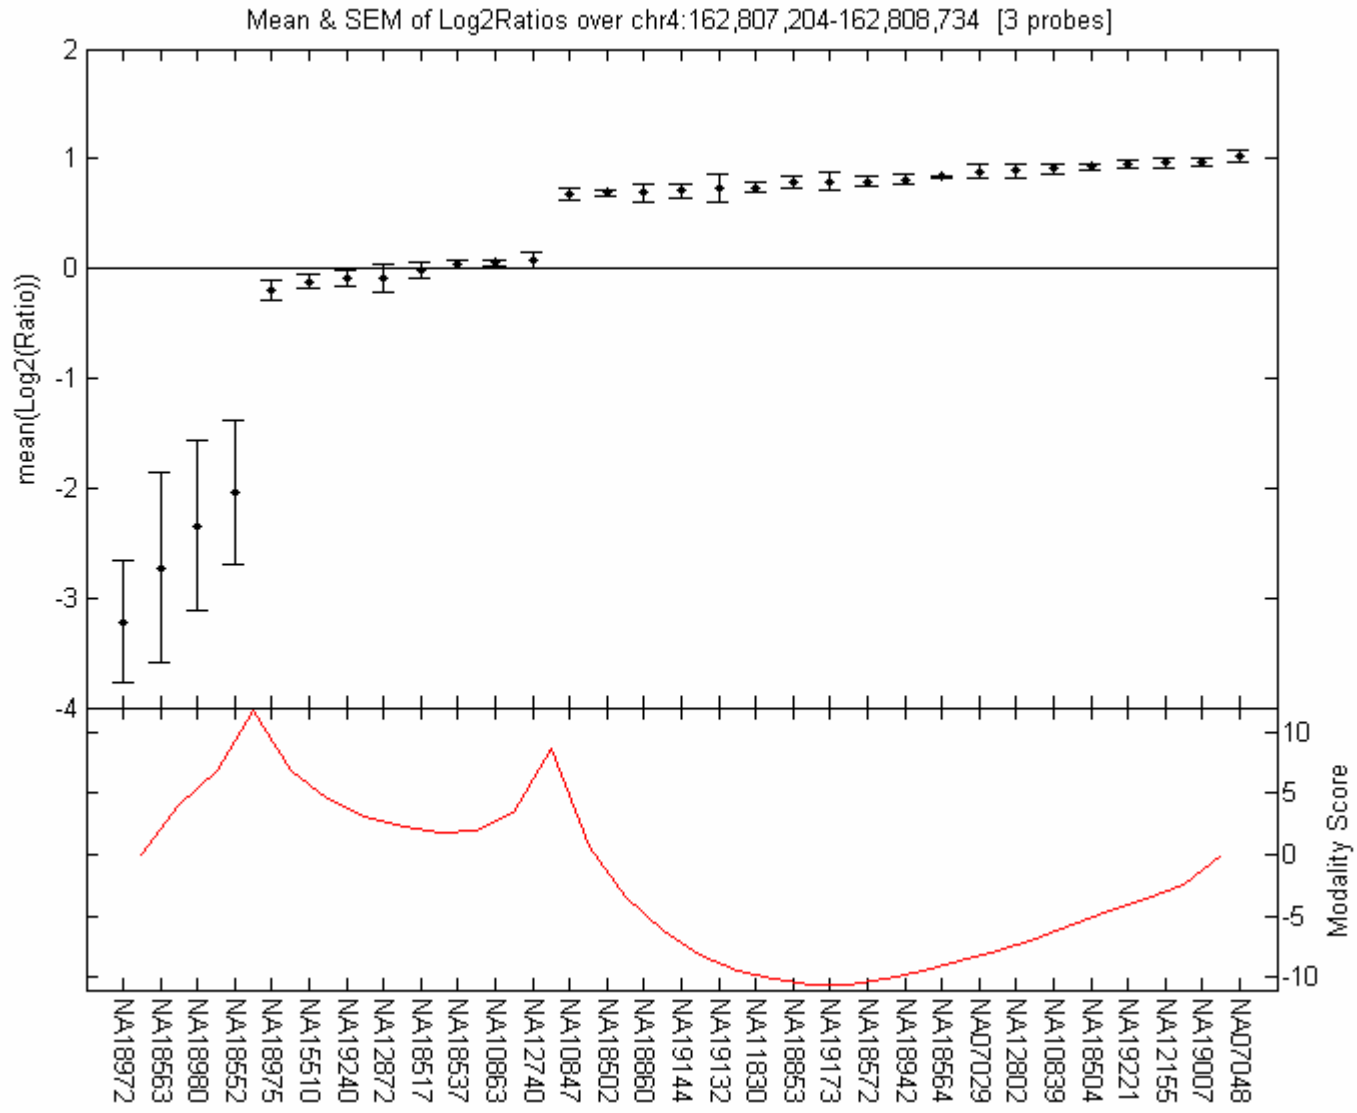

chr4:166,012,796-166,013,781 Score=15.8871

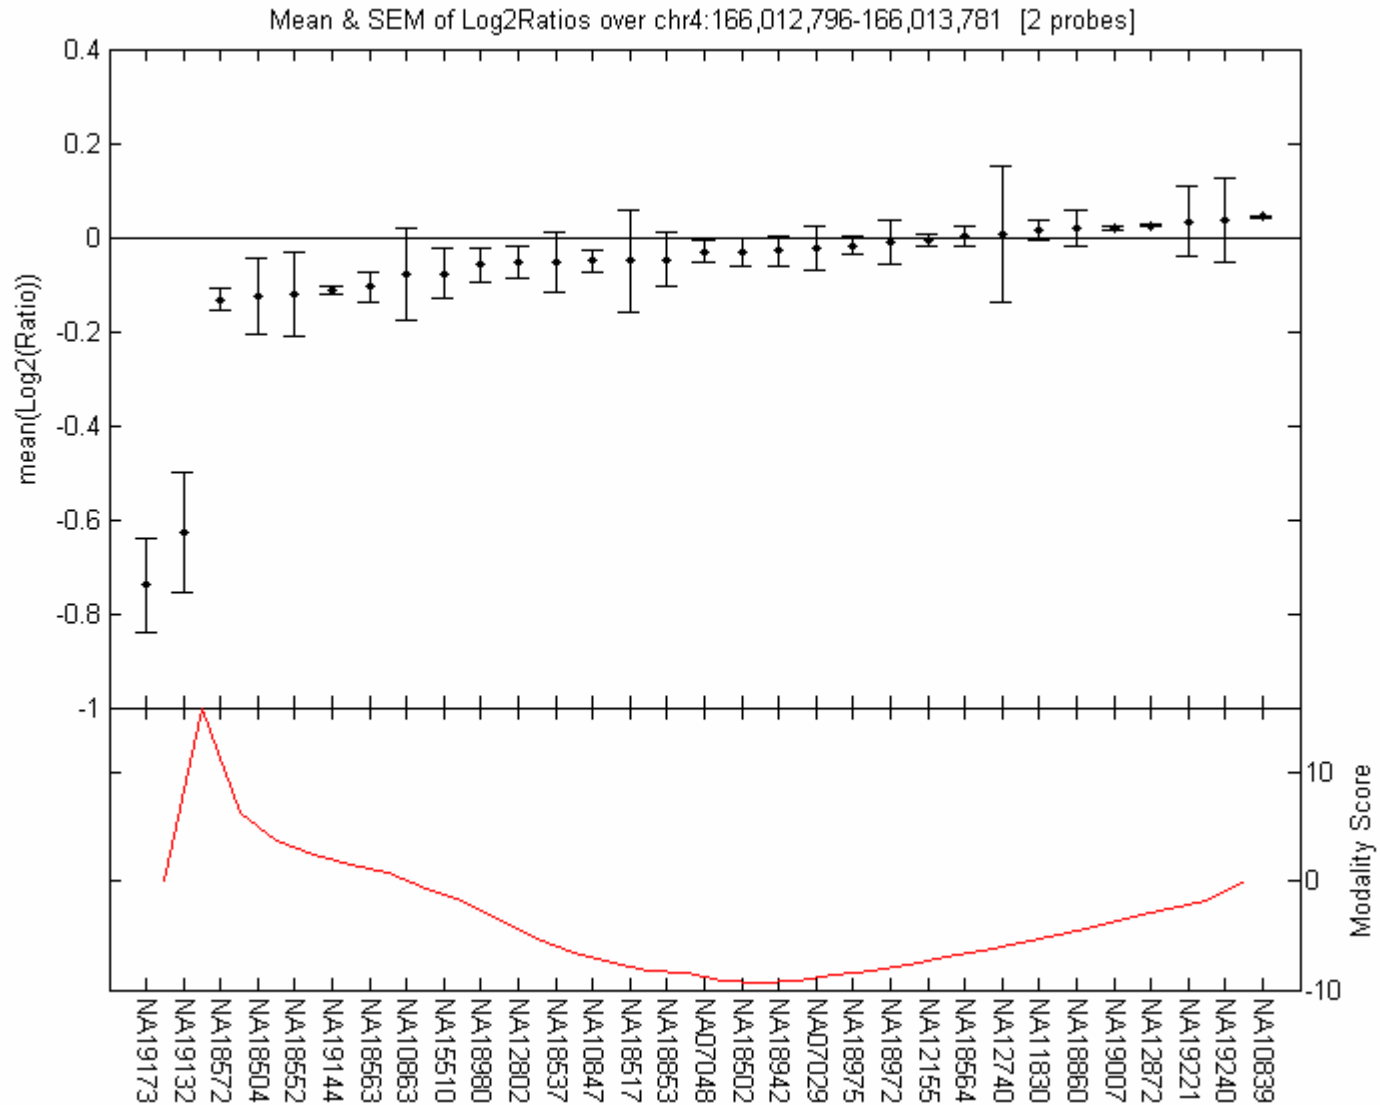

chr4:166,219,788-166,243,659 Score=15.511

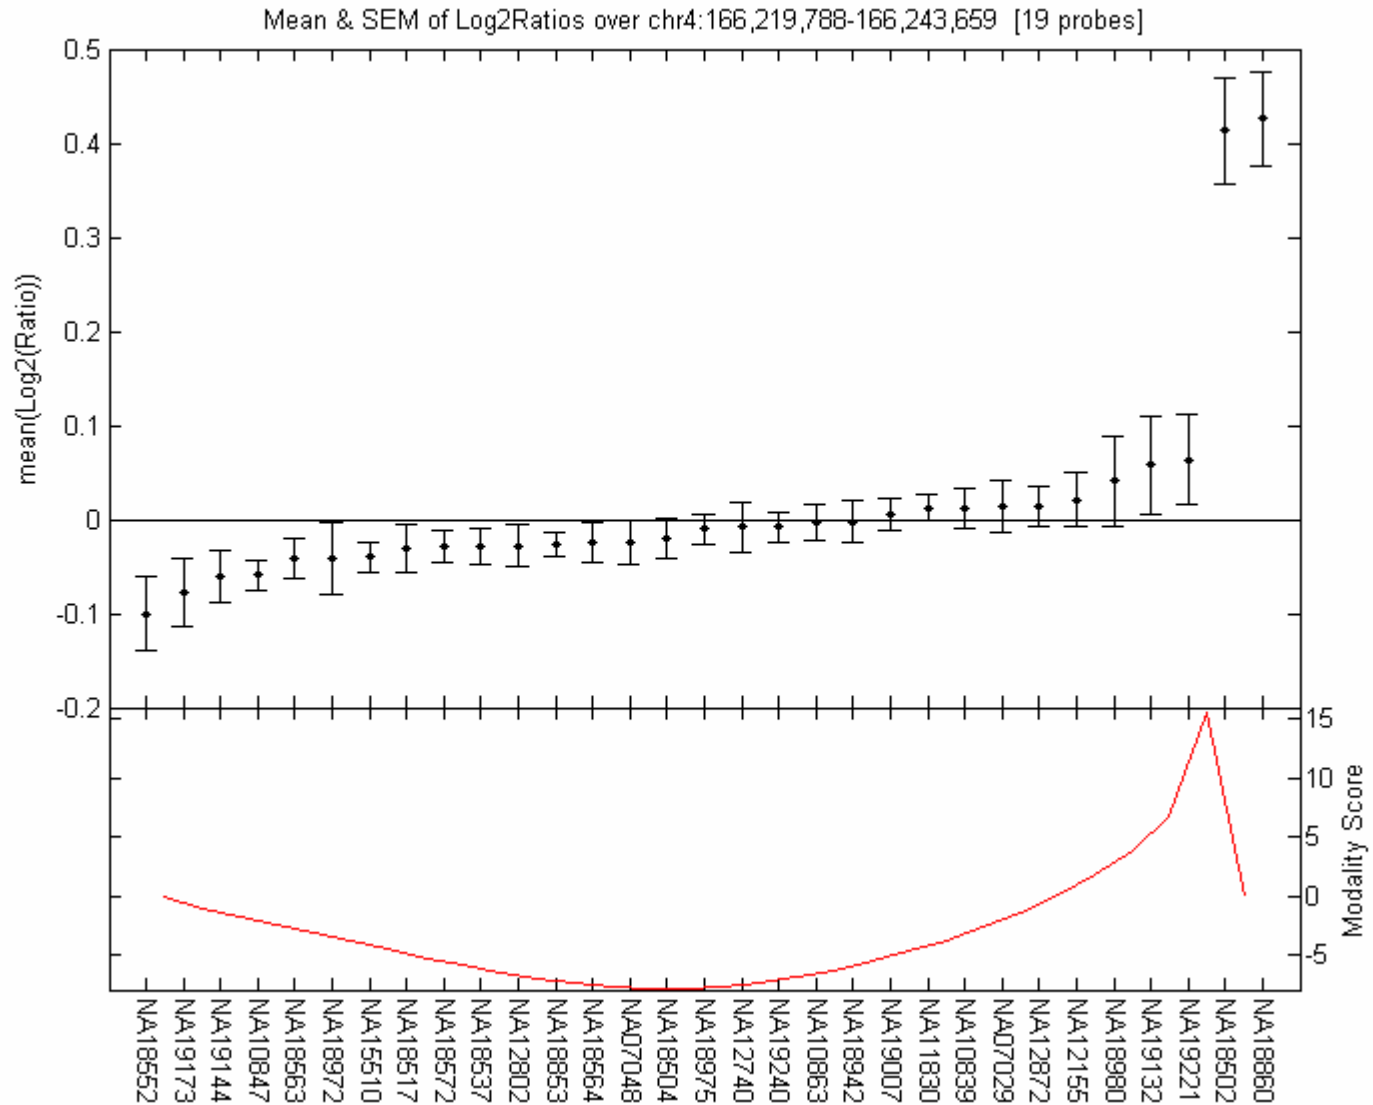

chr4:172,751,596-172,753,256 Score=10.9682

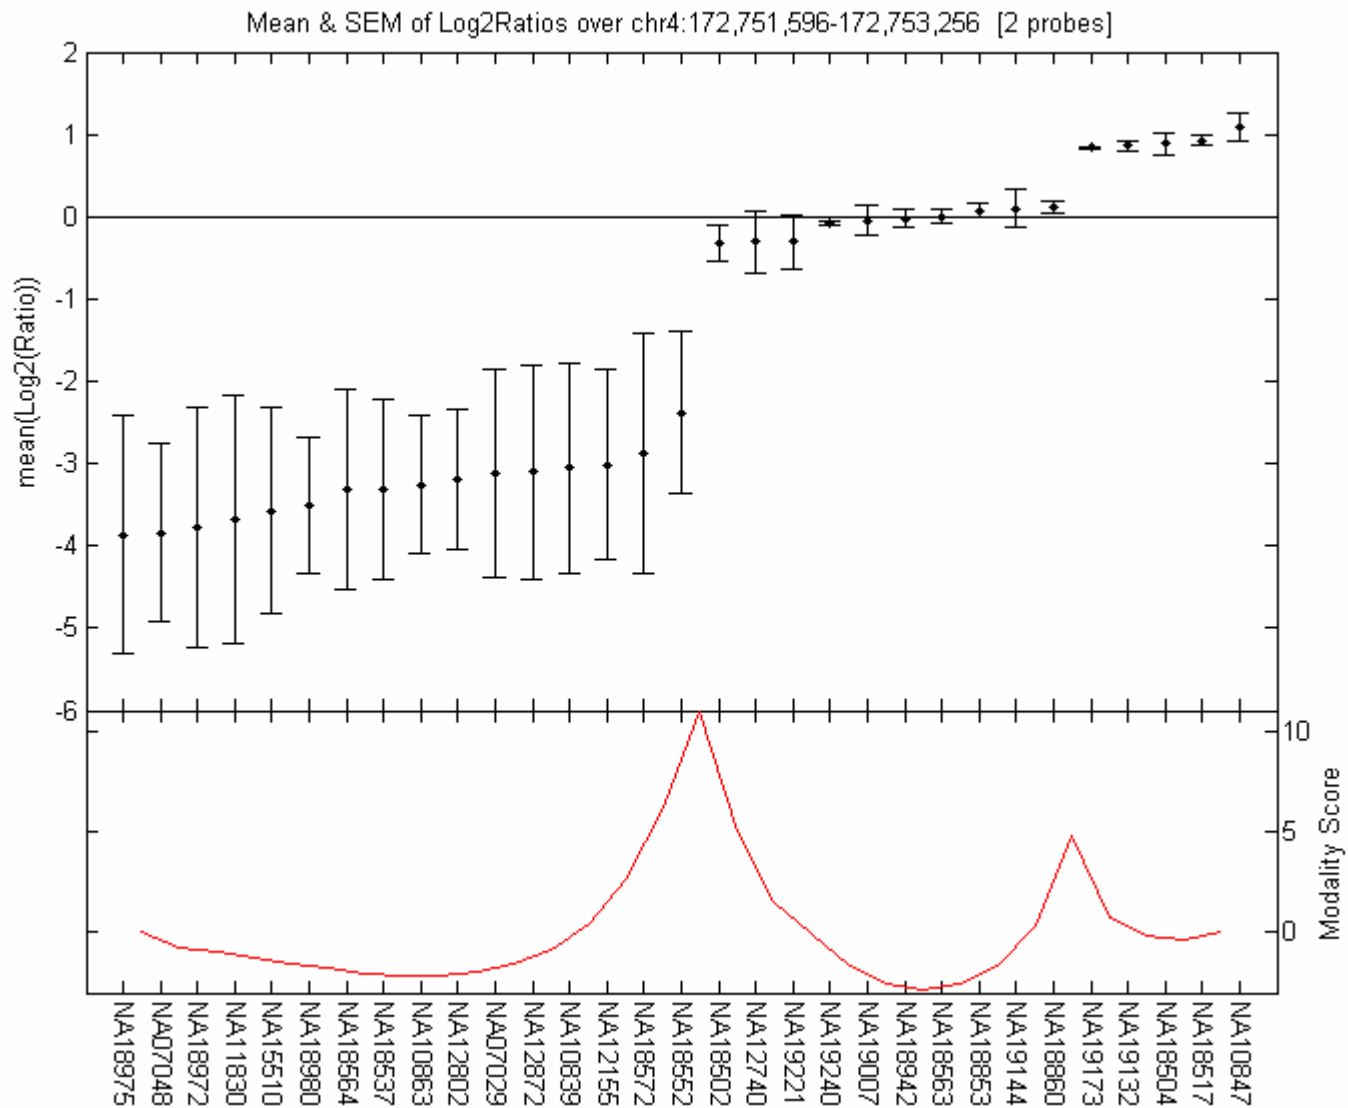

chr4:173,364,606-173,367,283 Score=8.6002

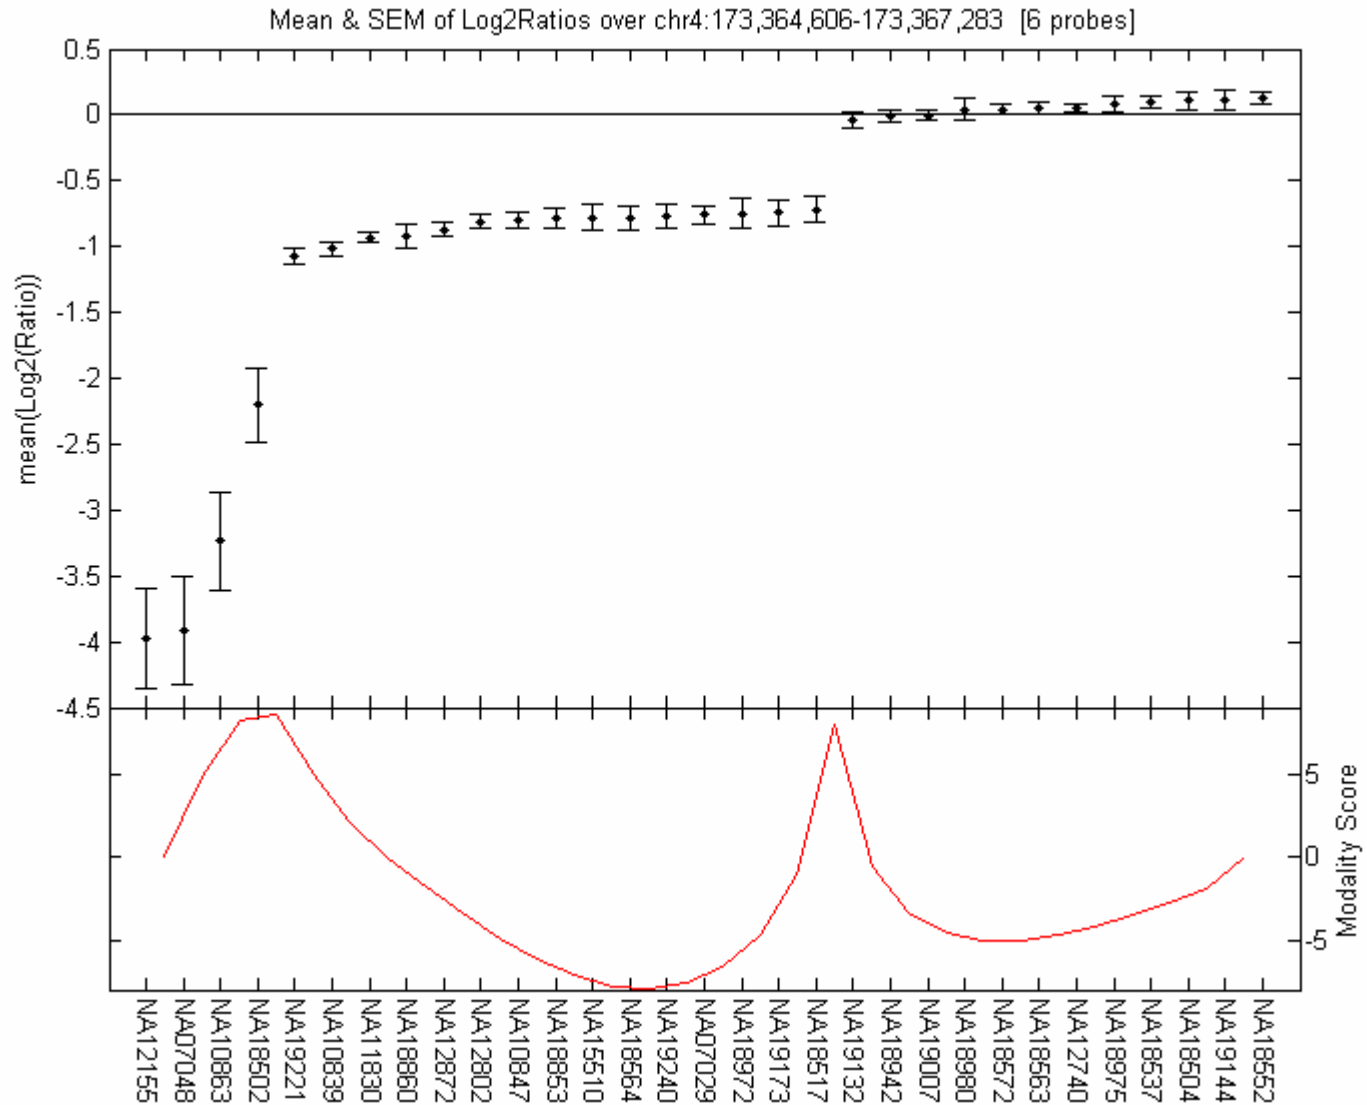



chr4:173,800,201-173,804,255 Score=9.7565

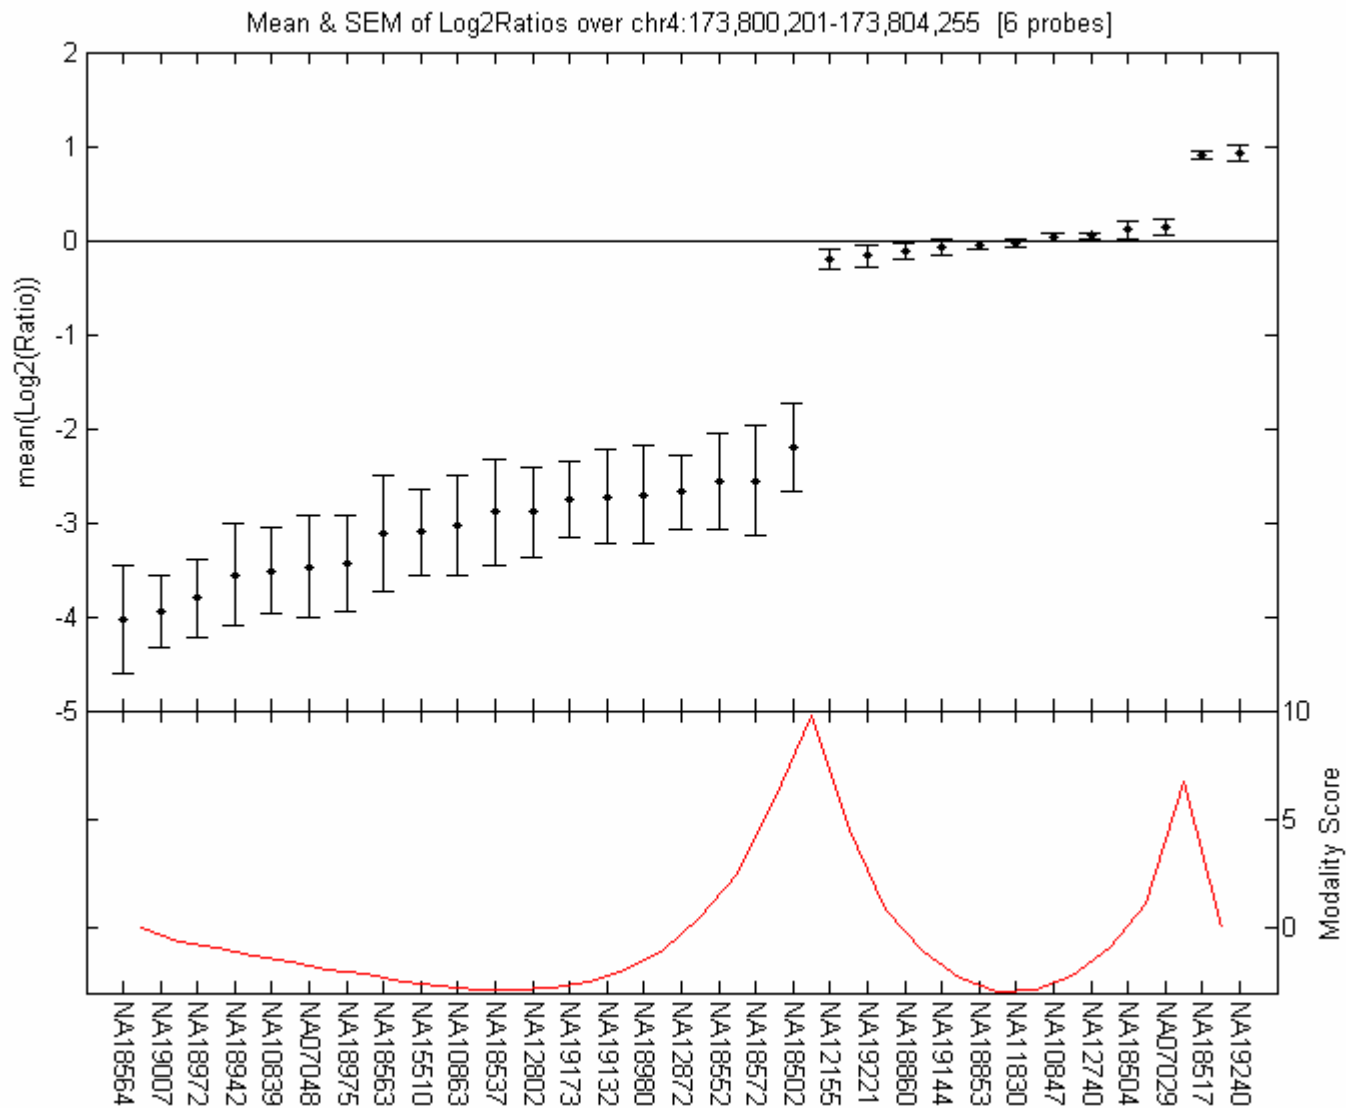

chr4:178,750,832-178,760,588 Score=21.1207

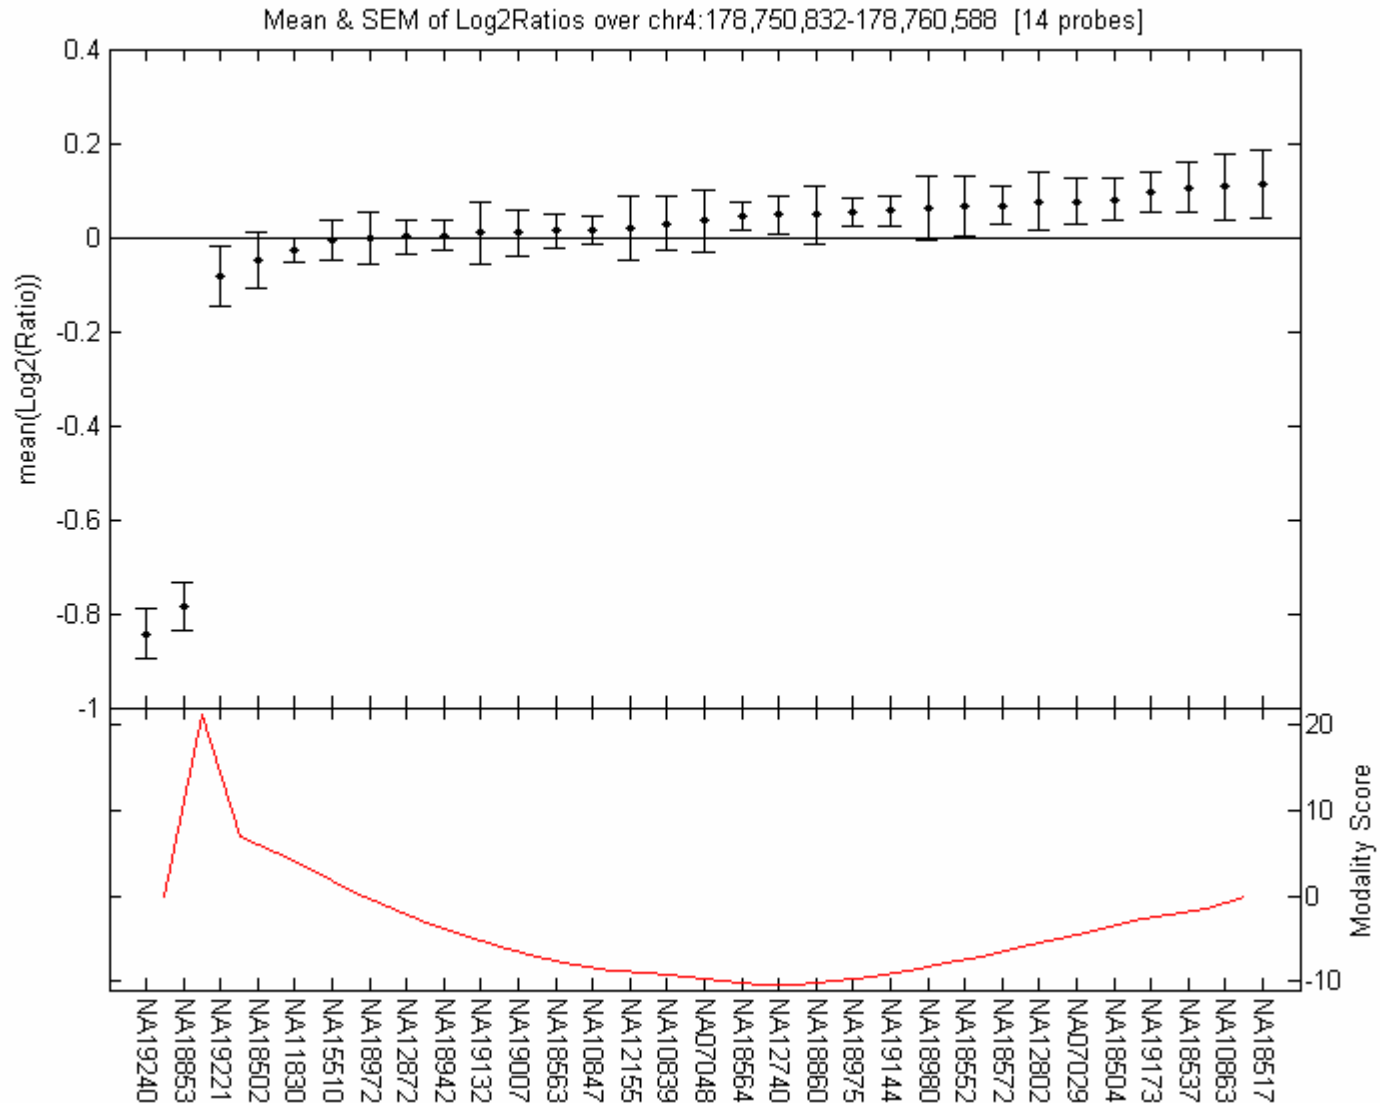

chr4:178,969,361-178,985,307 Score=24.7377

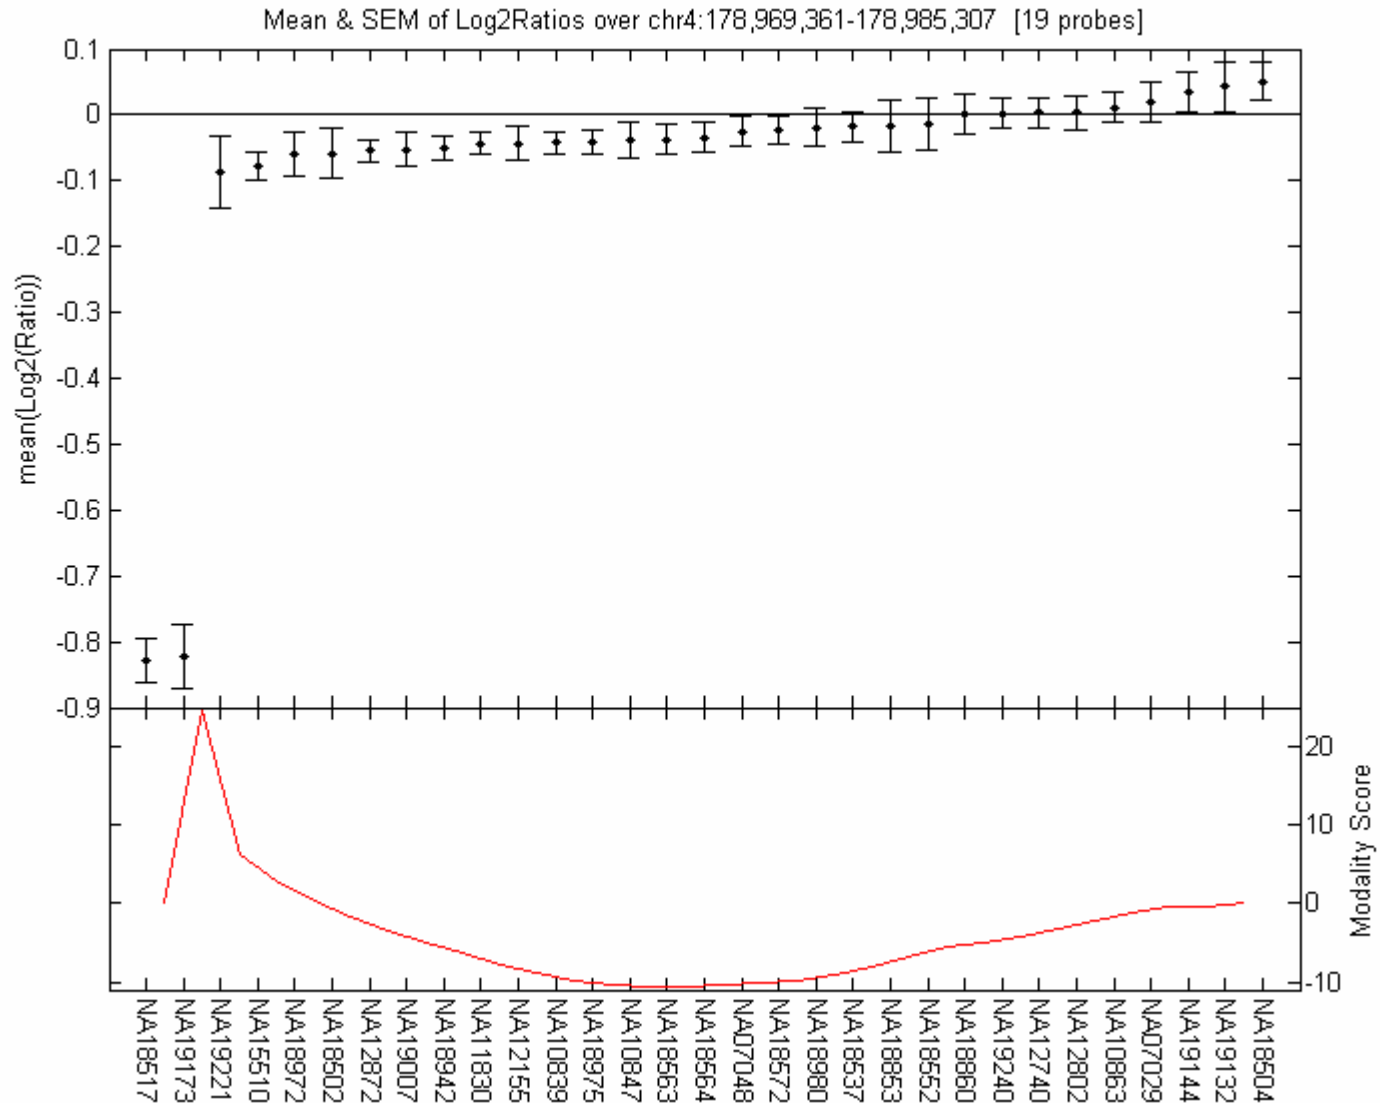

chr4:181,510,889-181,513,677 Score=17.4562

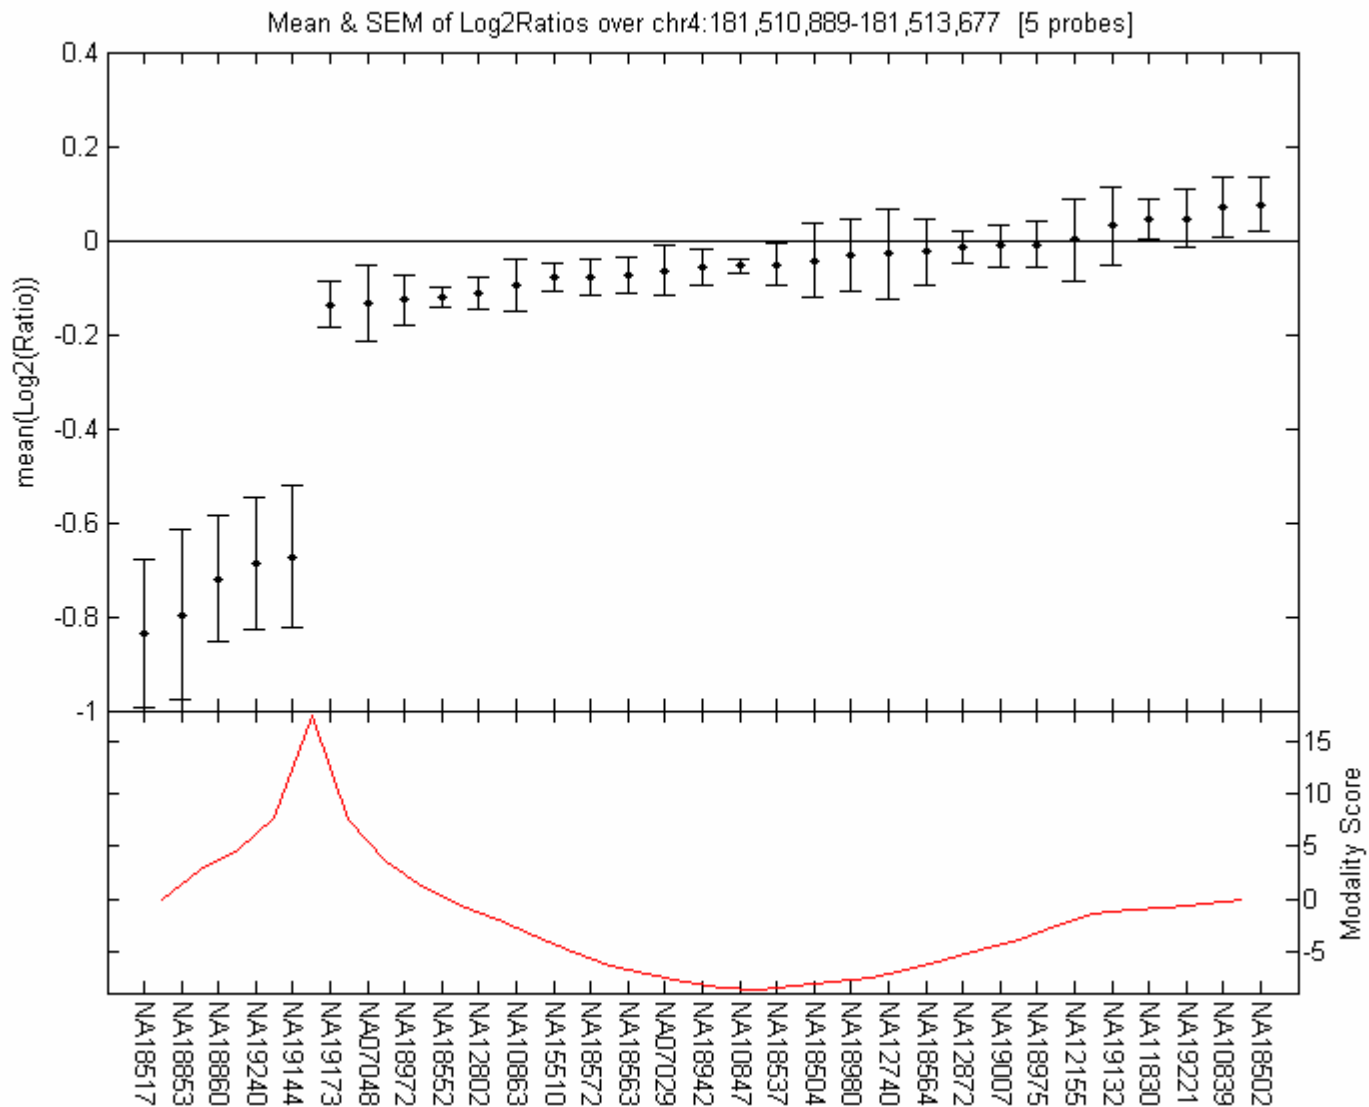

chr4:183,945,482-183,946,755 Score=16.2891

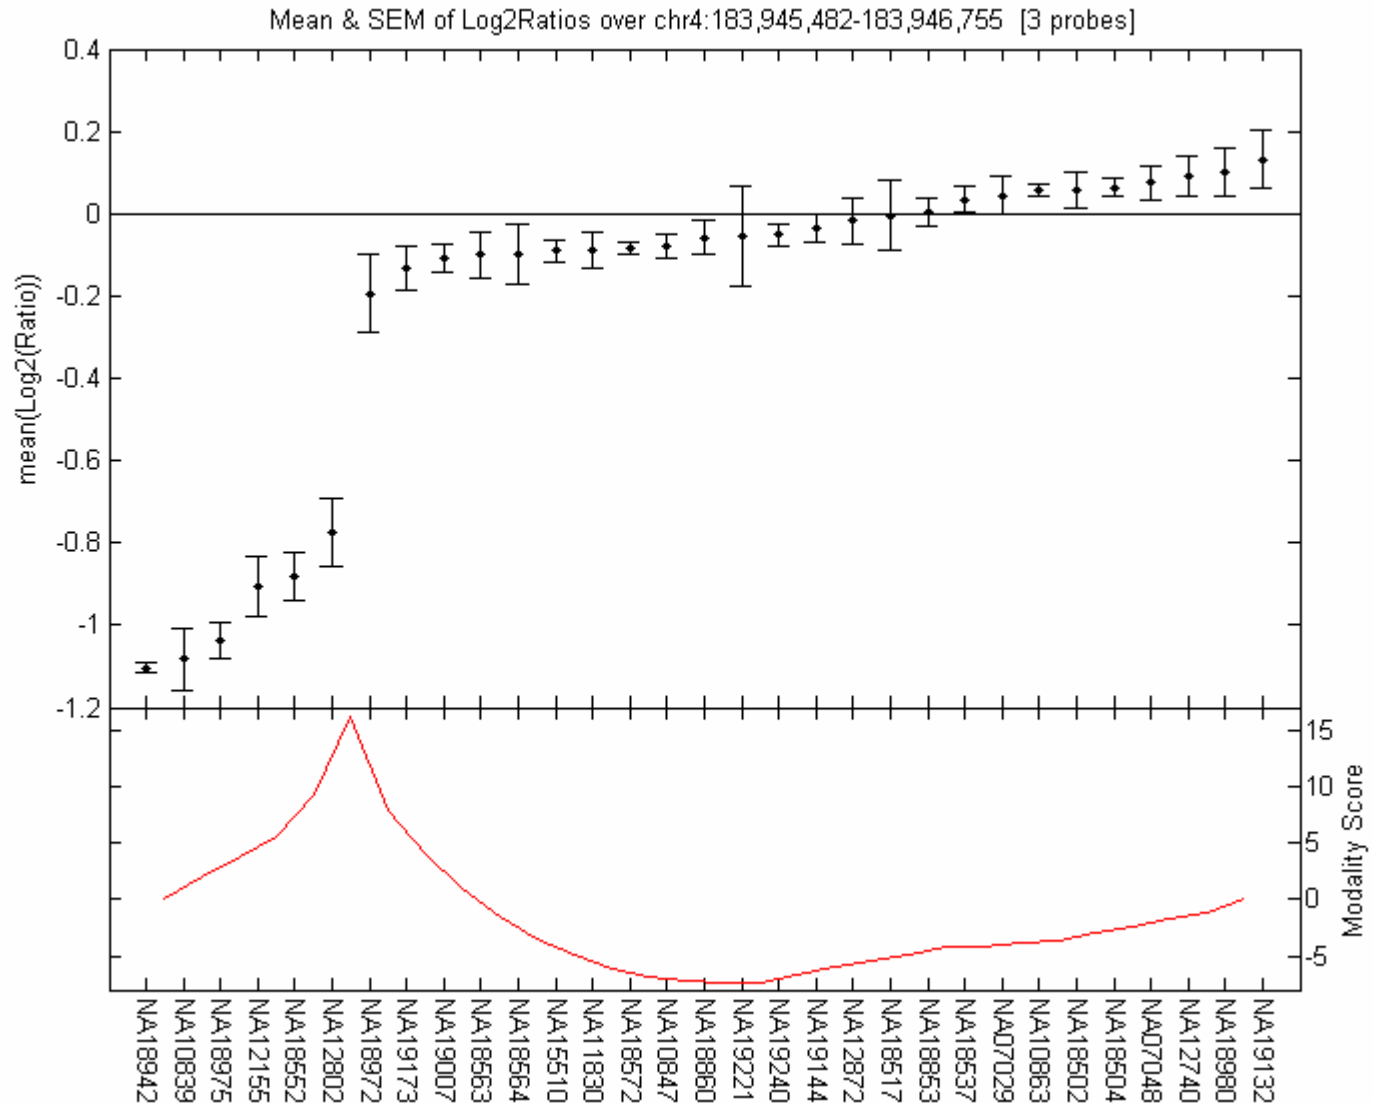

chr4:186,816,912-186,819,049 Score=14.3905

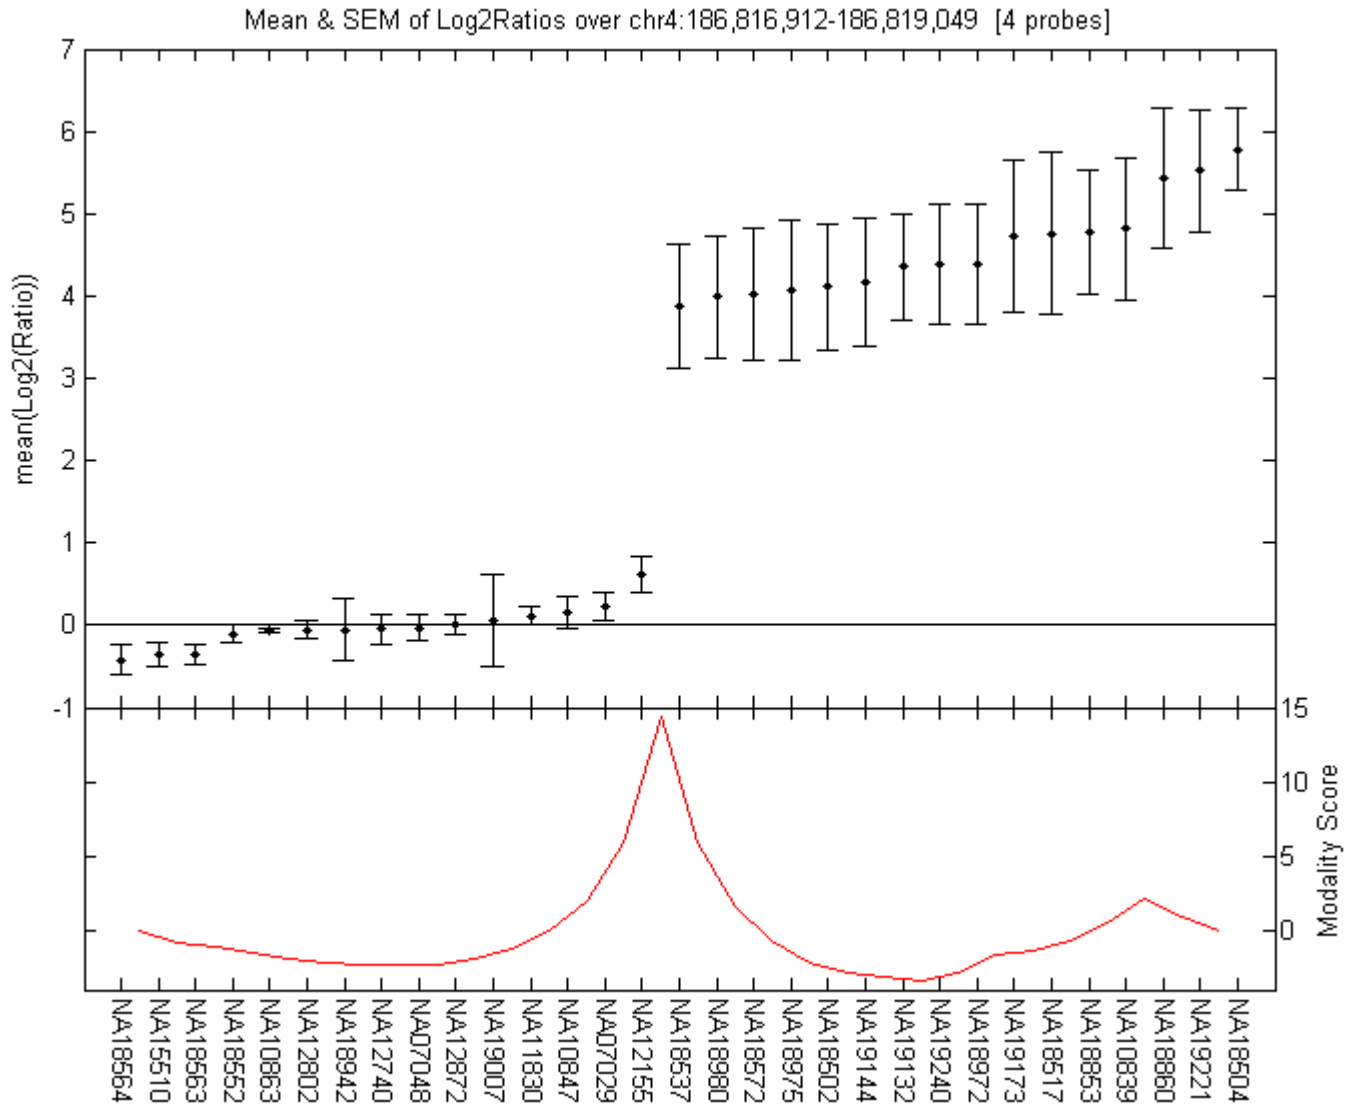

chr4:189,812,306-189,813,742 Score=16.9562

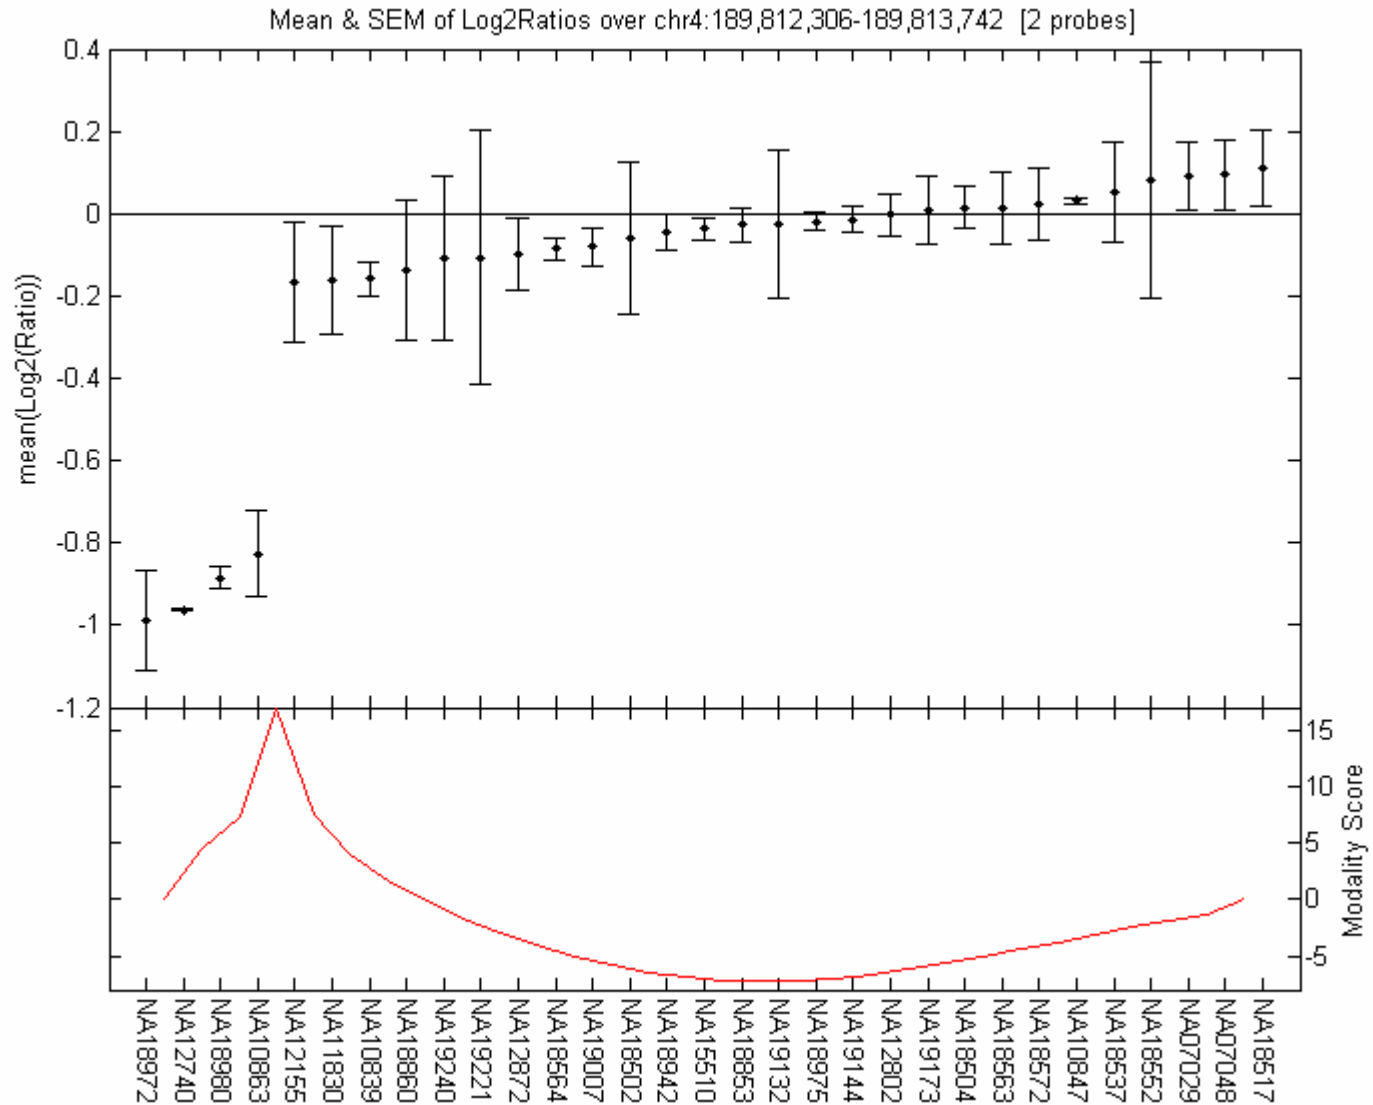

chr5:1,231,949-1,232,879 Score=10.926

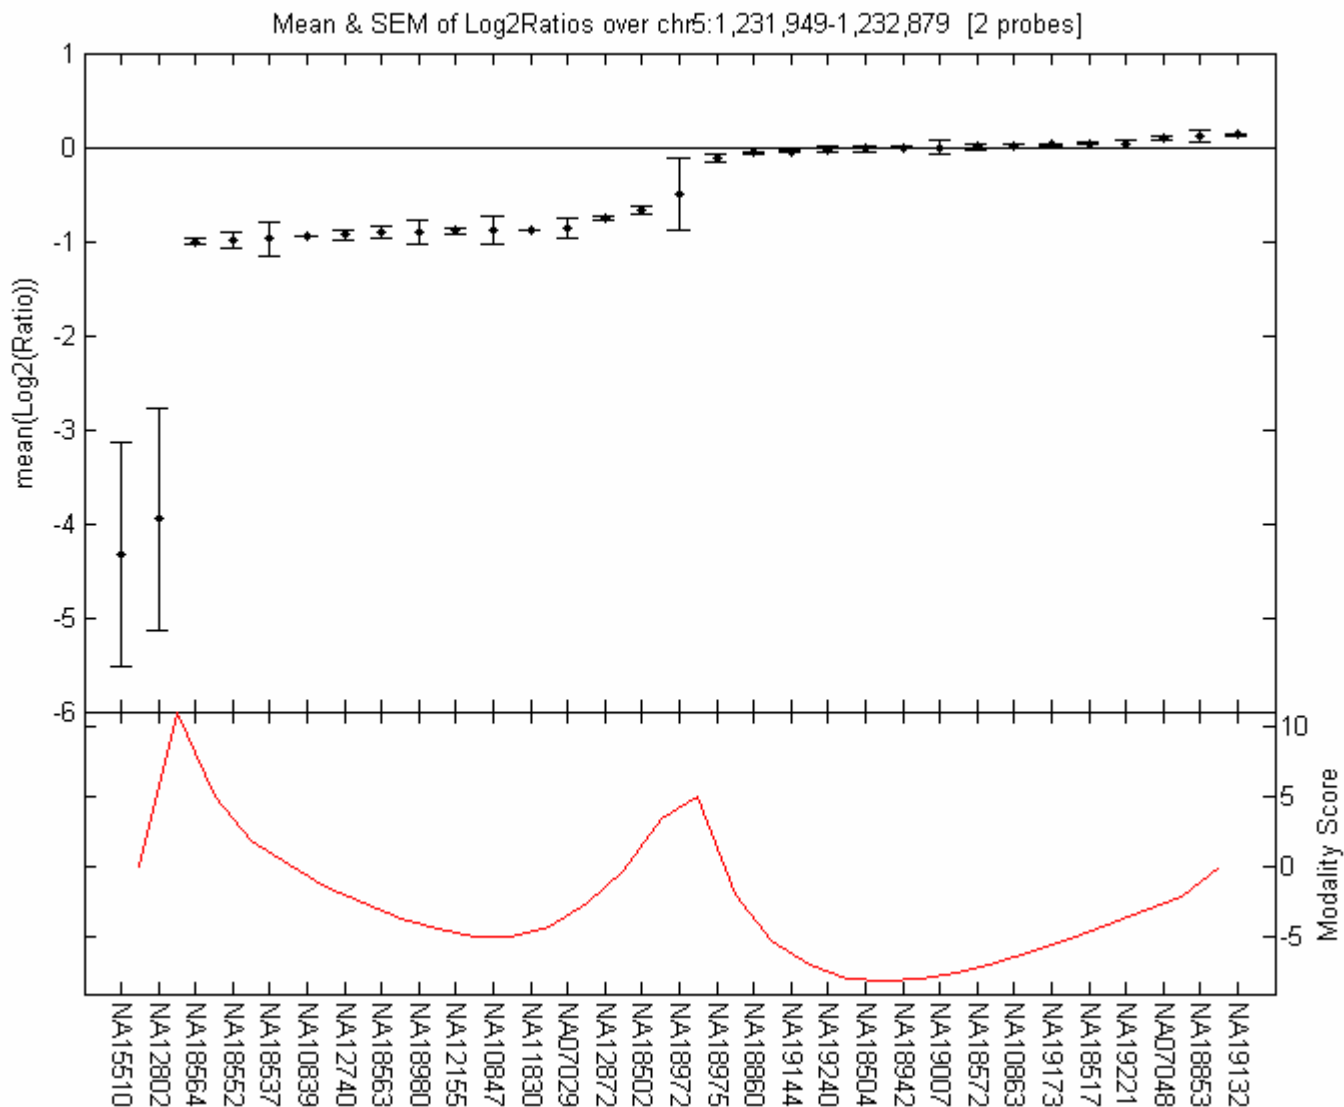



chr5:3,712,024-3,713,223 Score=13.3348

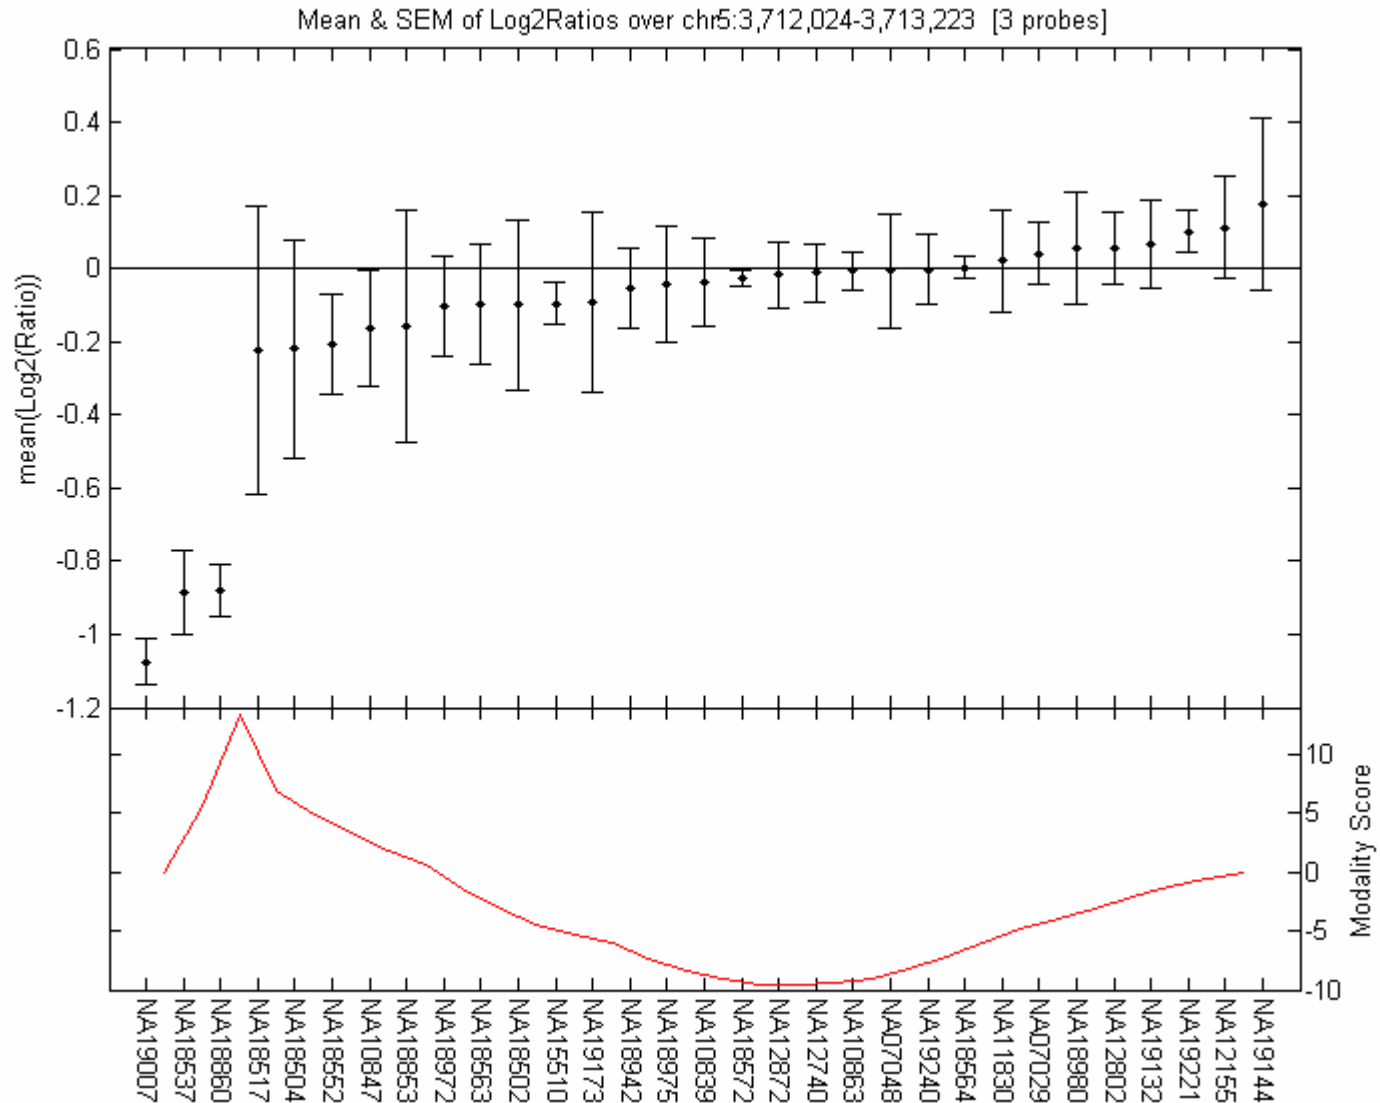

chr5:8,756,055-8,801,659 Score=21.7502

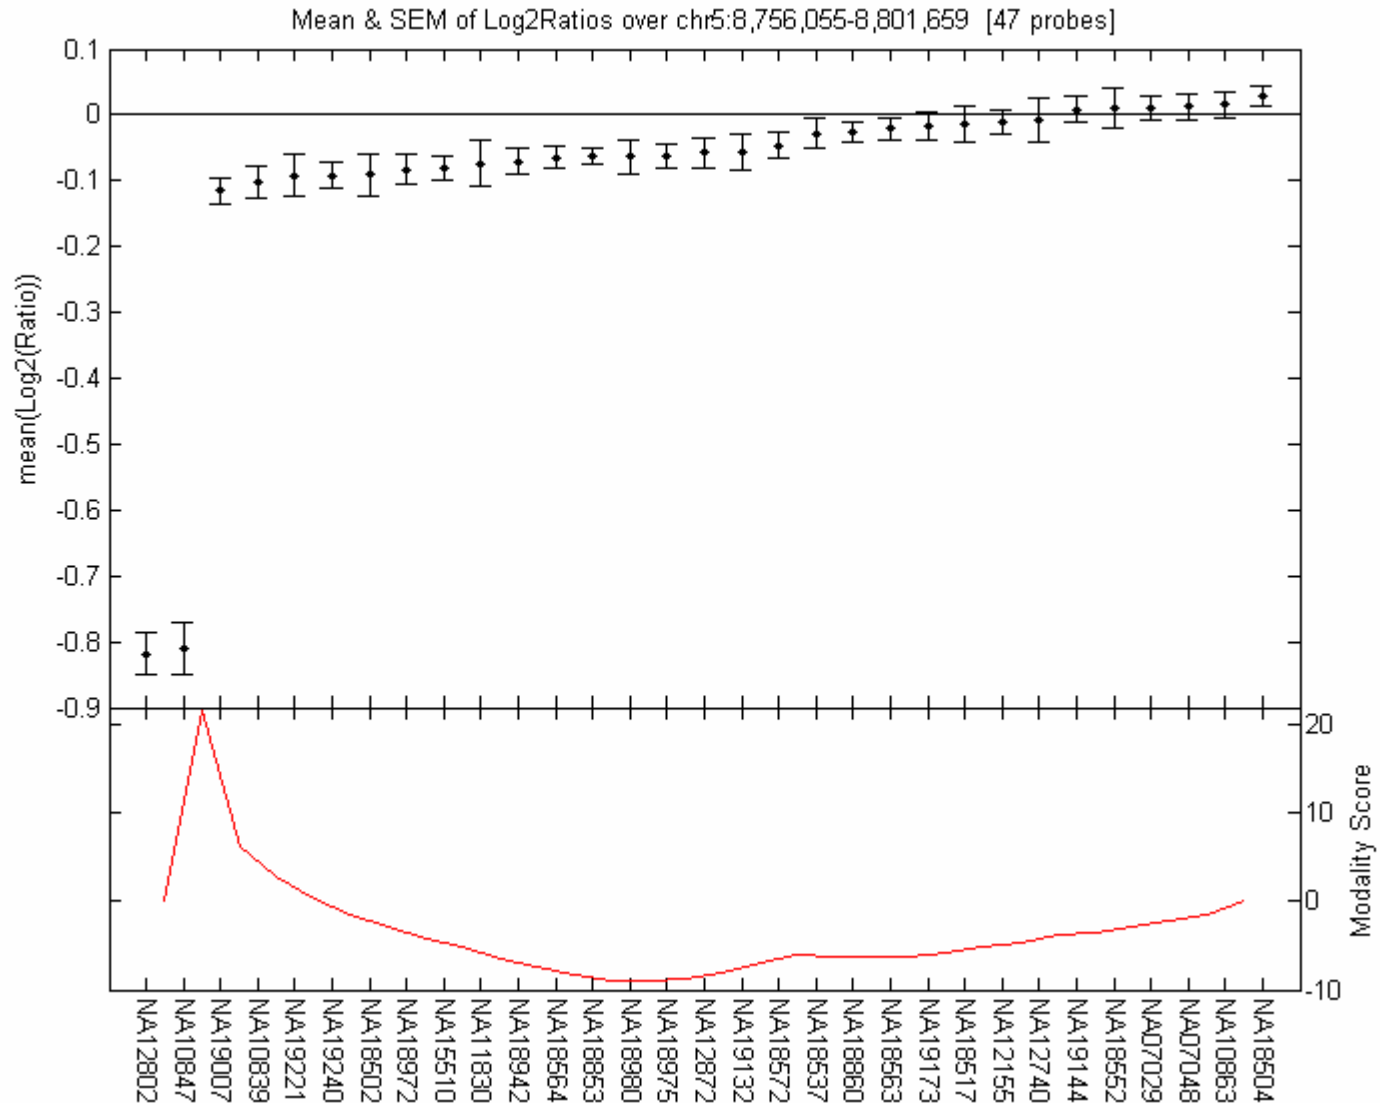

chr5:12,864,144-12,873,198 Score=8.6422

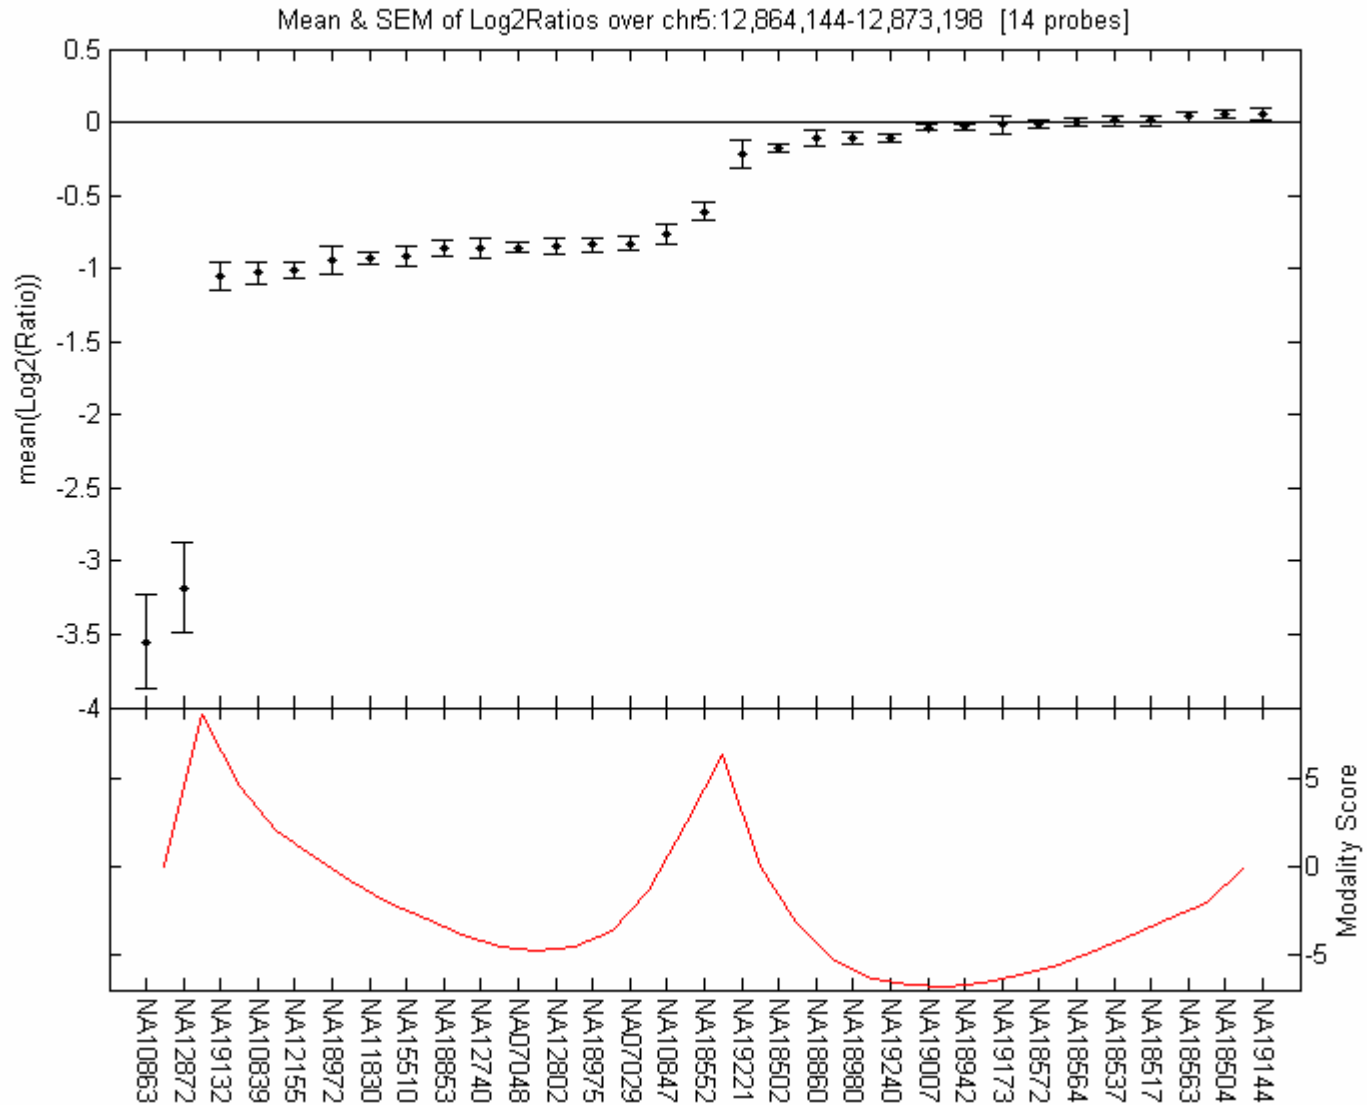

chr5:17,518,865-17,523,994 Score=18.6623

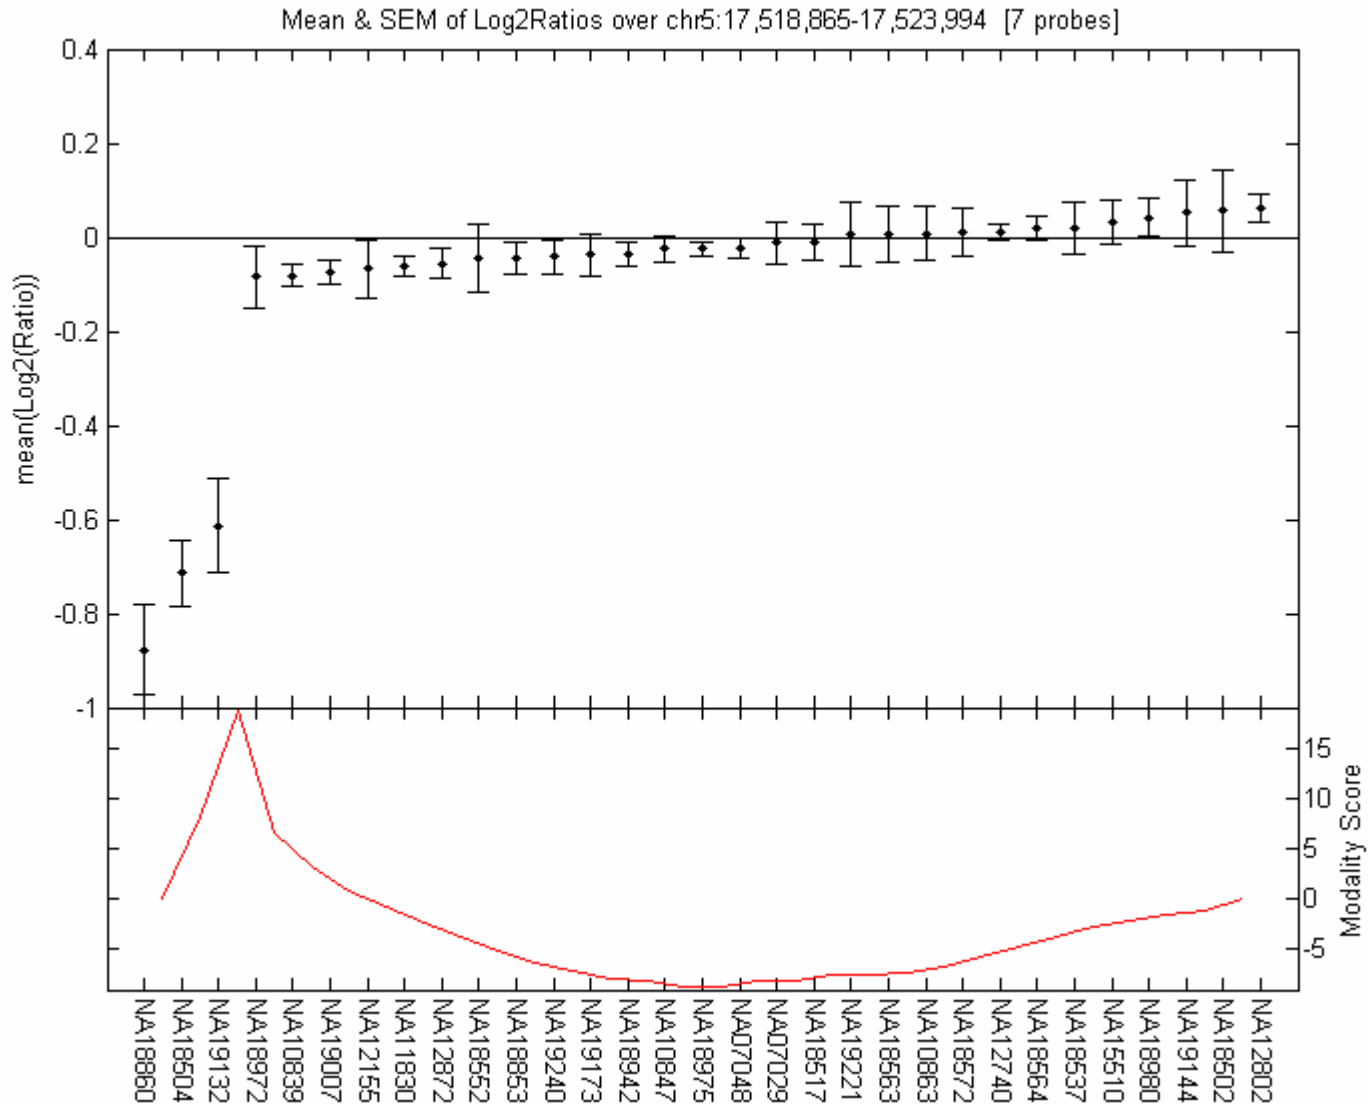

chr5:19,411,305-19,411,980 Score=13.5317

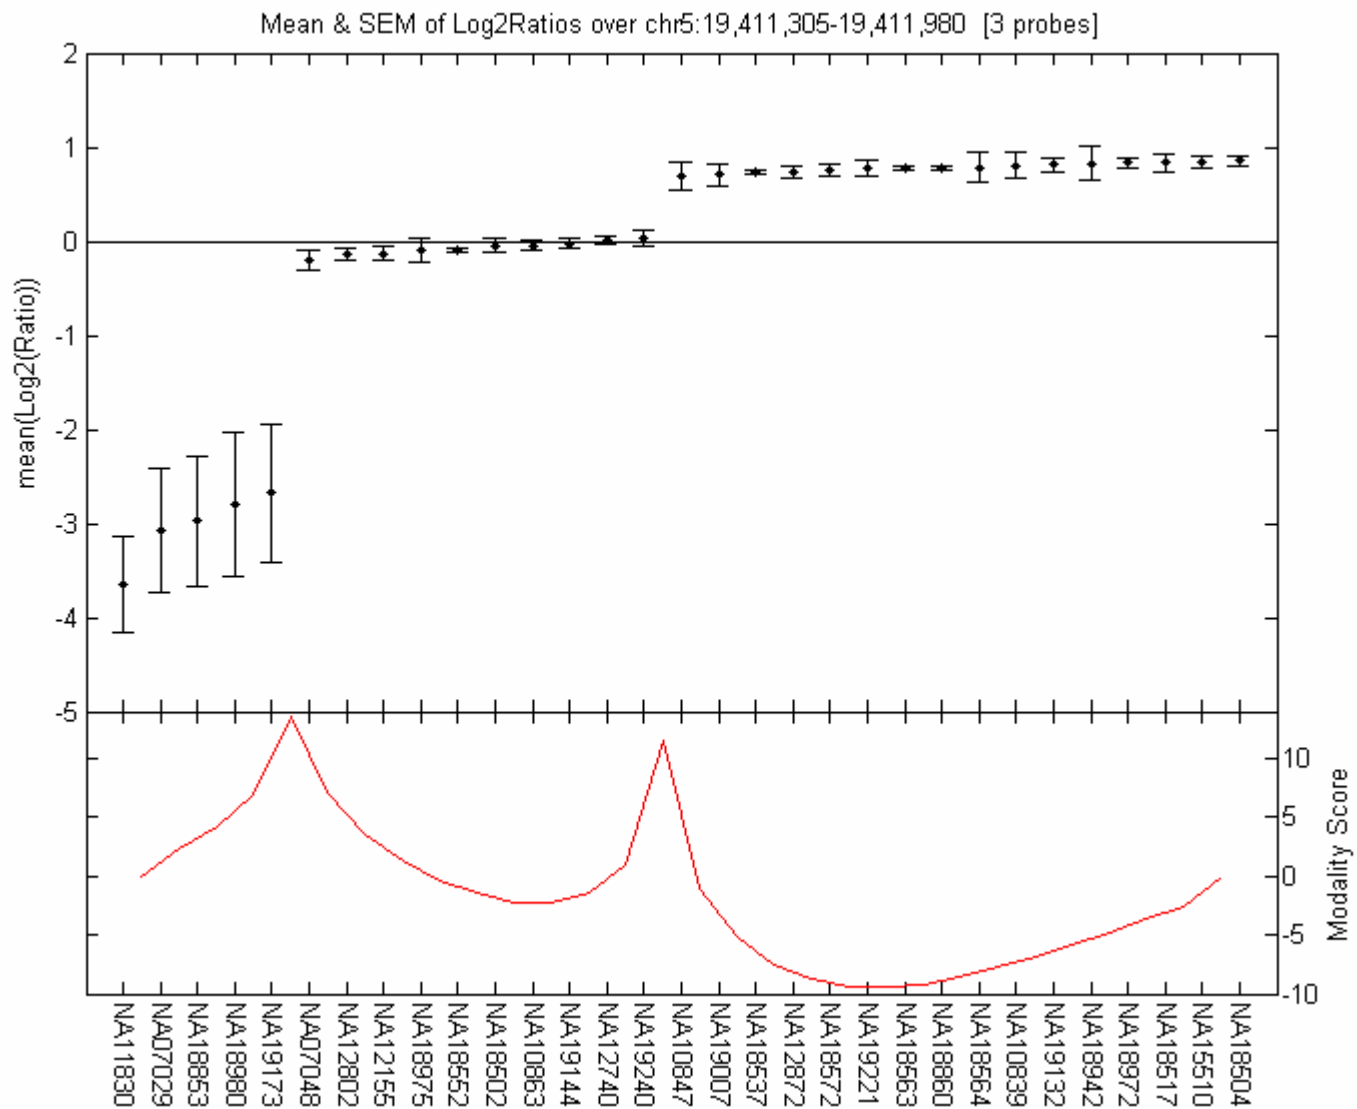

chr5:20,457,881-20,462,468 Score=14.5731

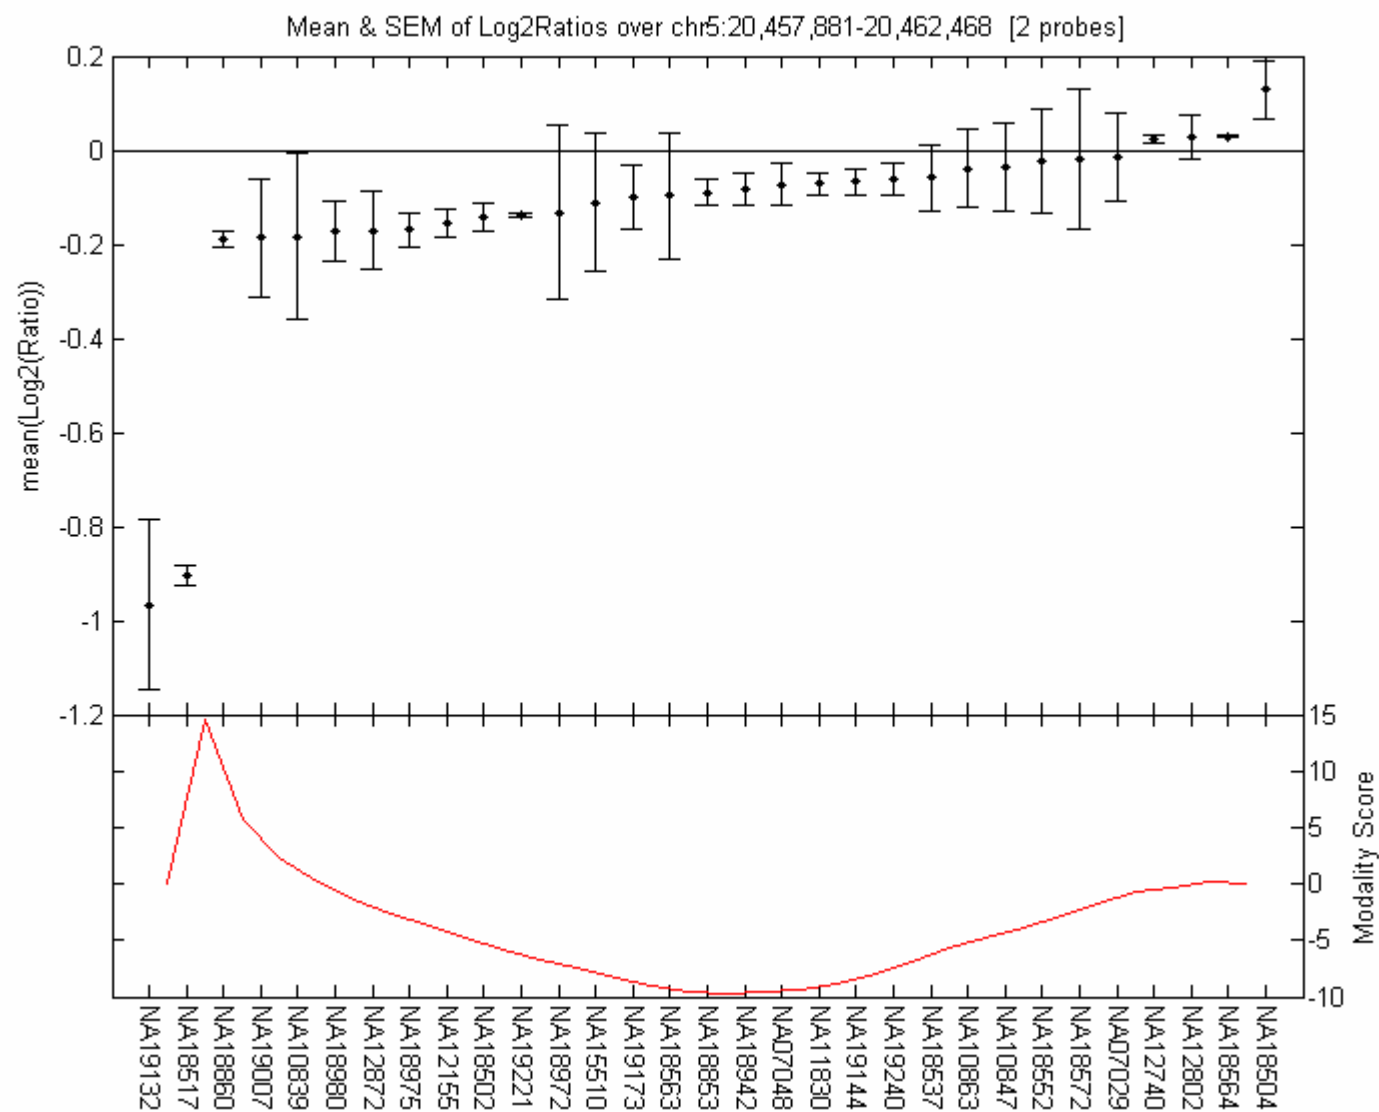

chr5:21,485,972-21,488,439 Score=10.4283

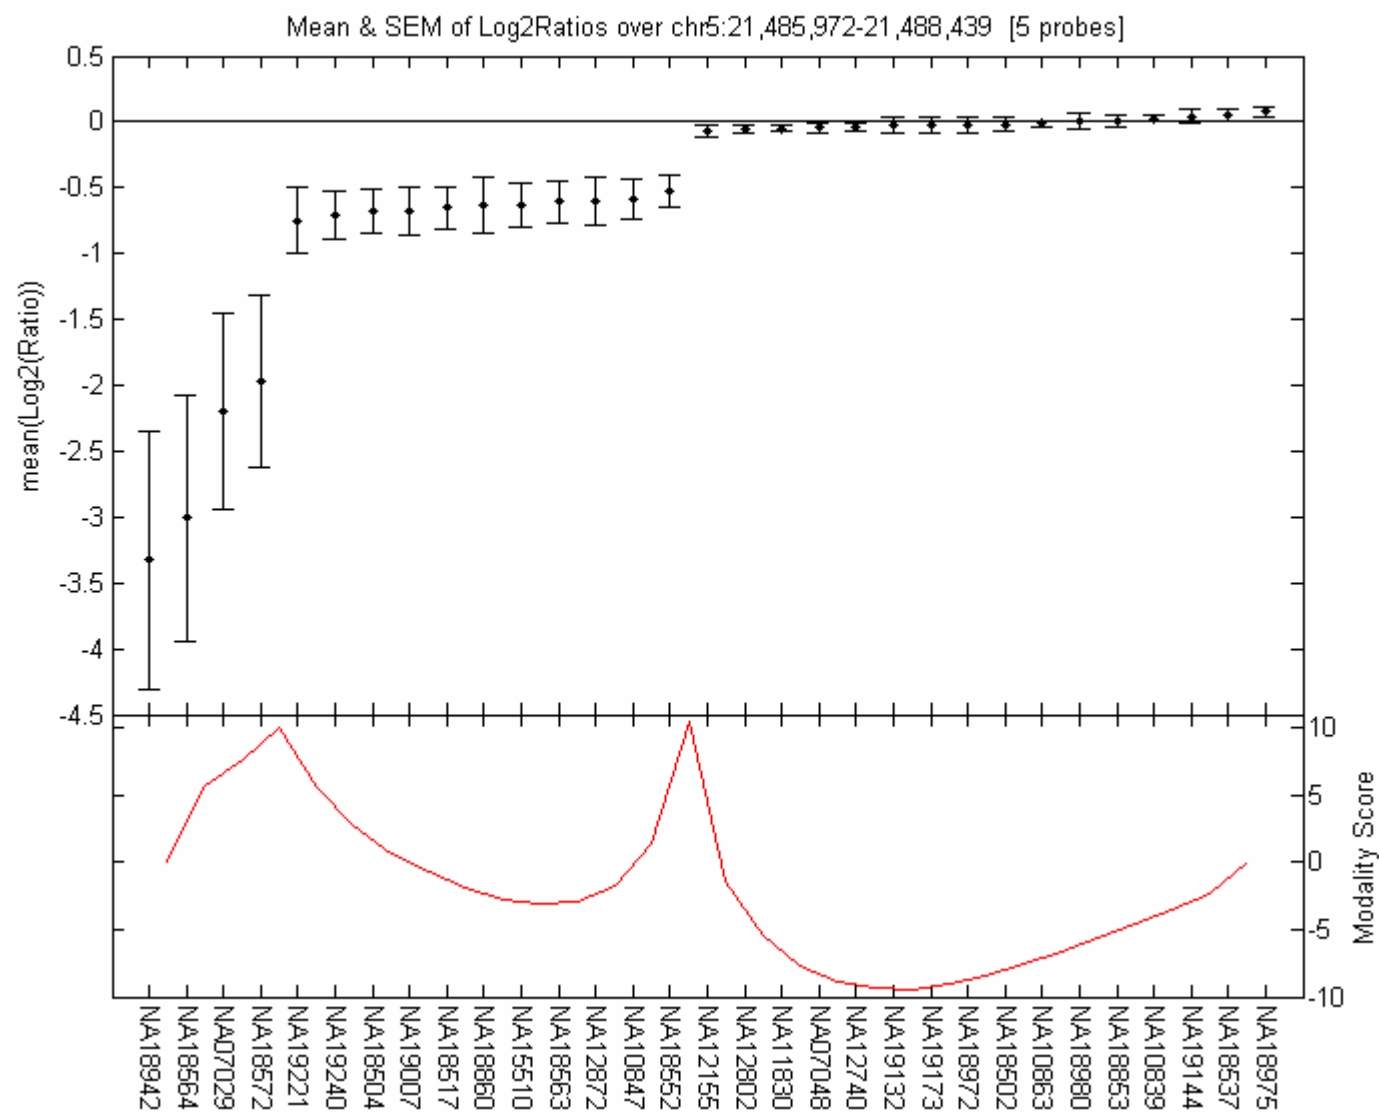

chr5:32,296,338-32,296,746 Score=23.5574

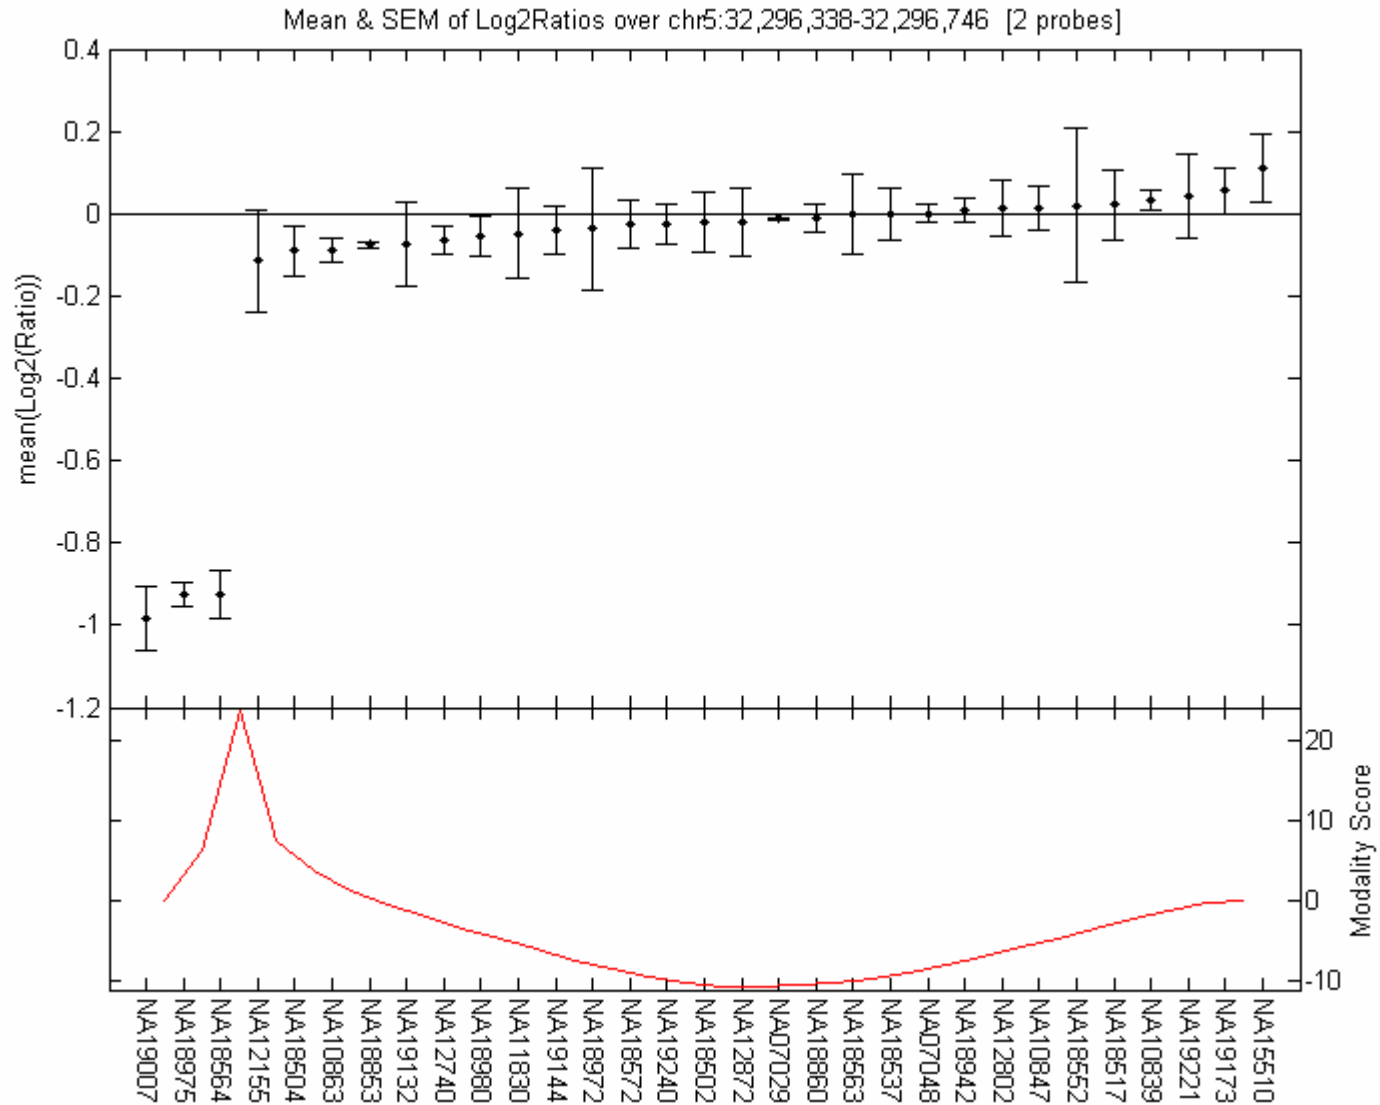



chr5:57,359,904-57,367,789 Score=14.0978

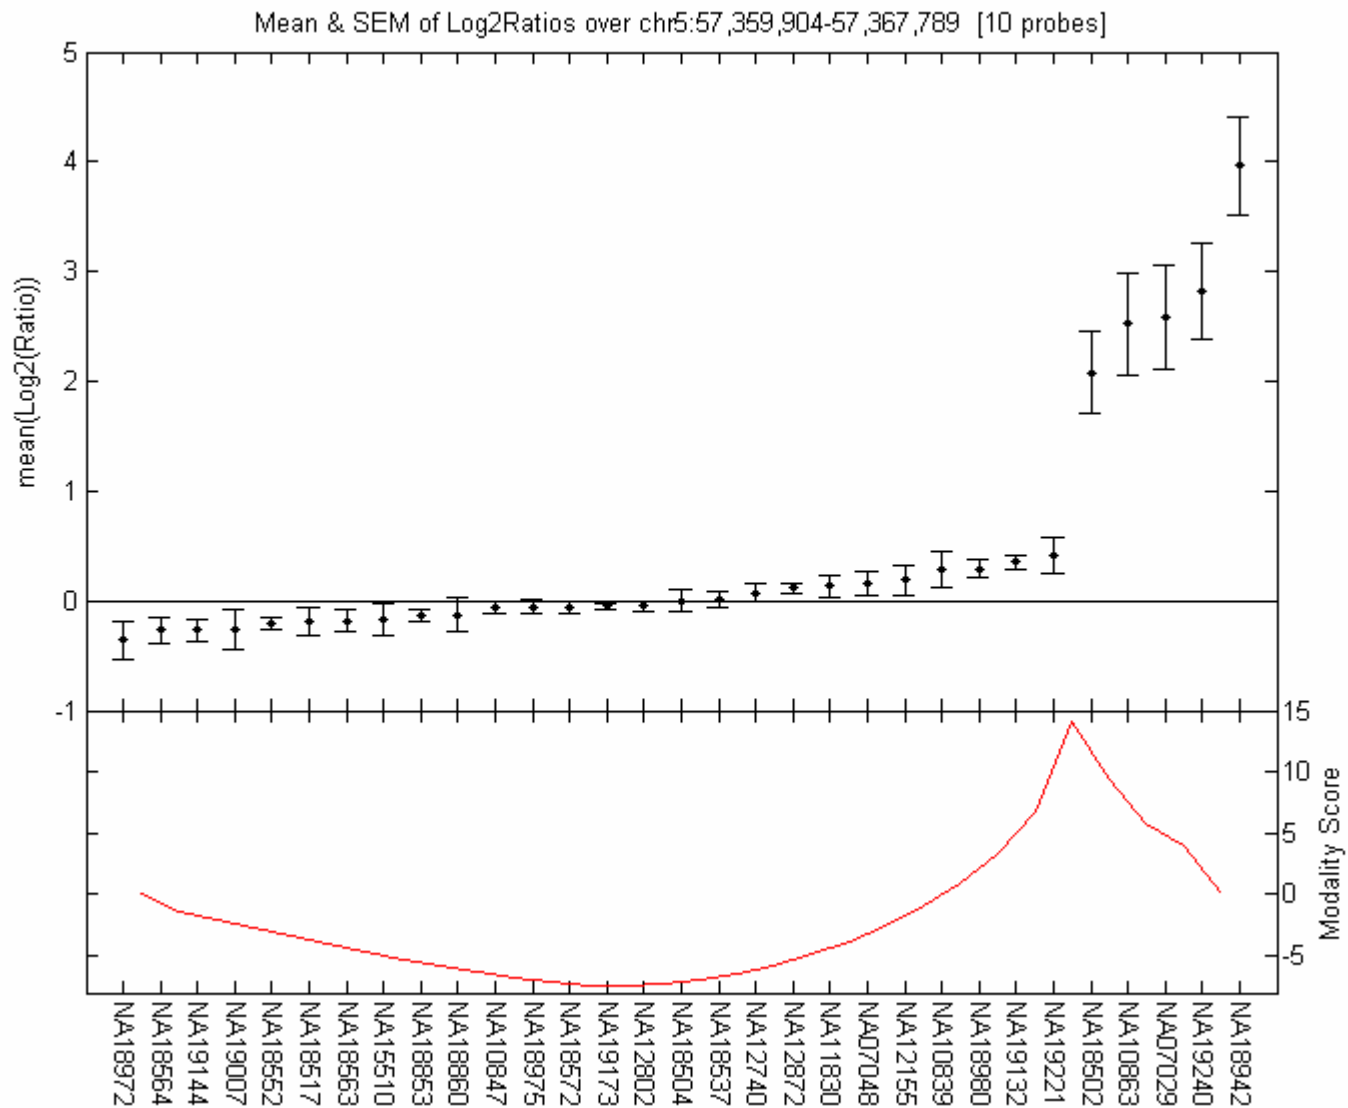

chr5:61,784,192-61,784,900 Score=16.5807

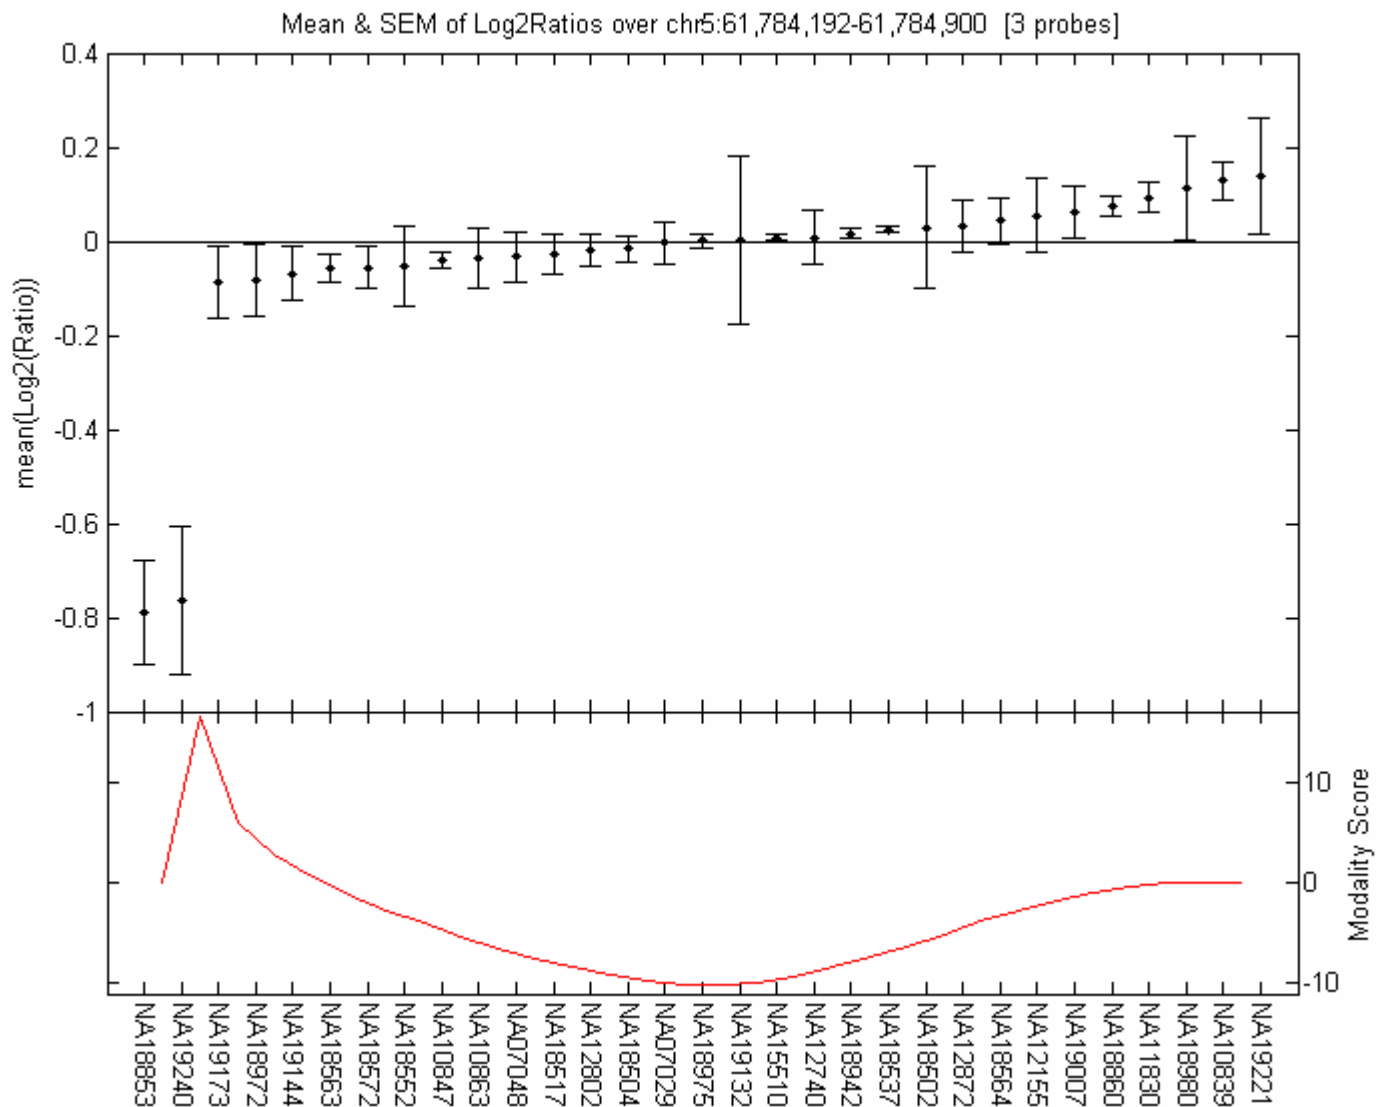

chr5:150,157,286-150,161,621 Score=13.3577

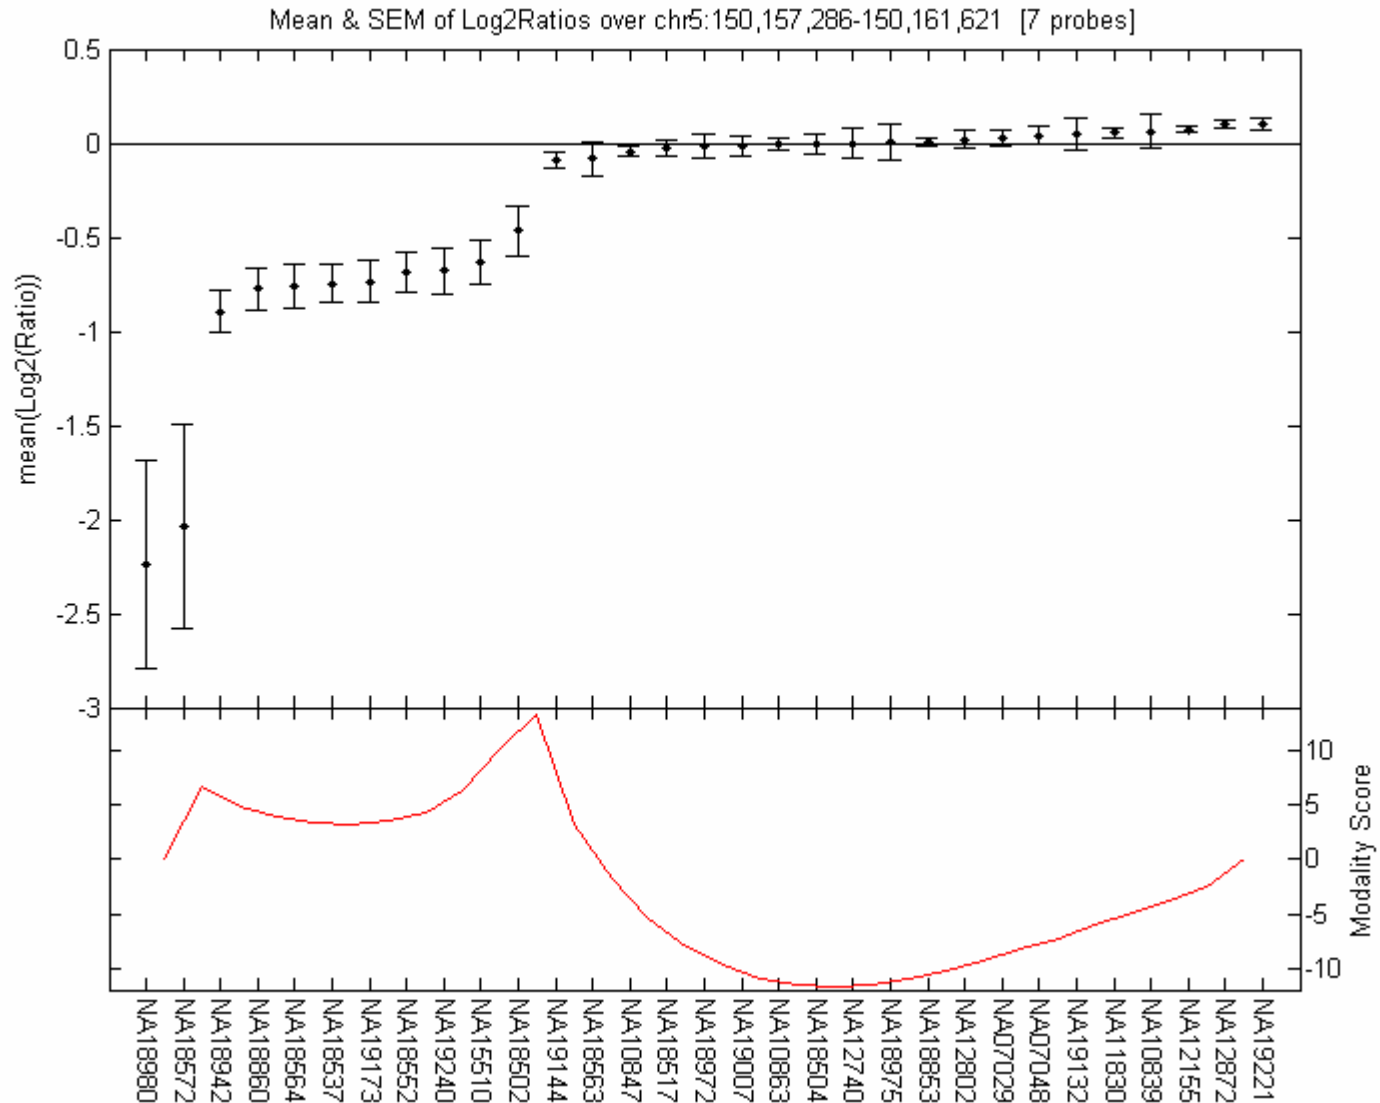

chr5:151,495,617-151,498,563 Score=15.6394

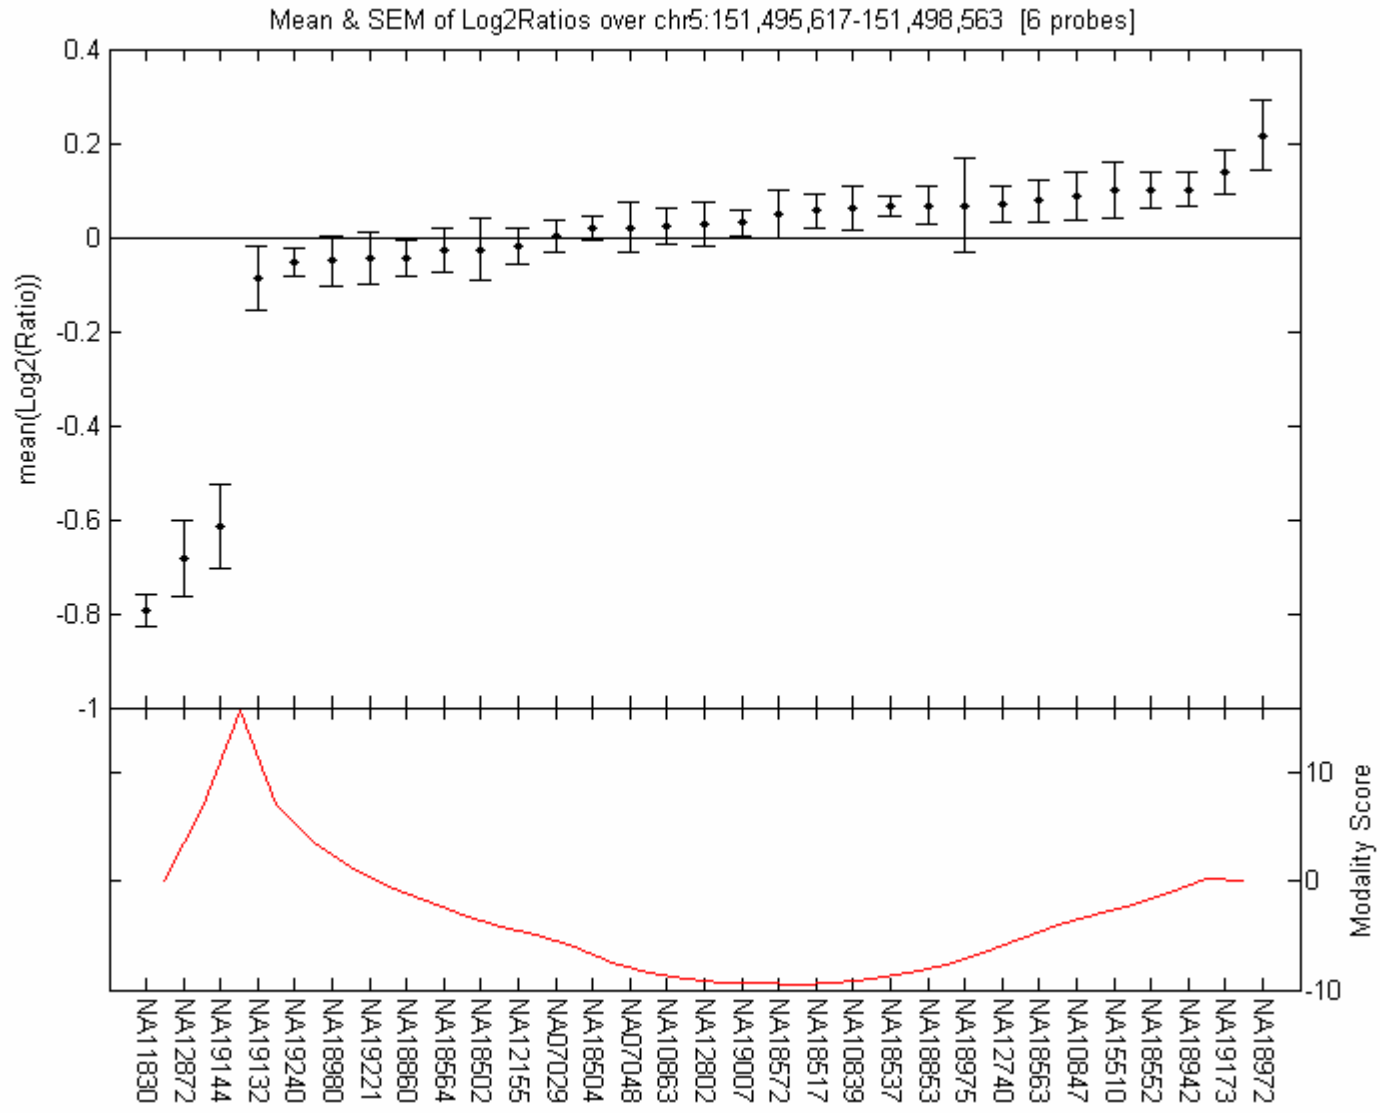

chr5:180,108,671-180,115,923 Score=14.6651

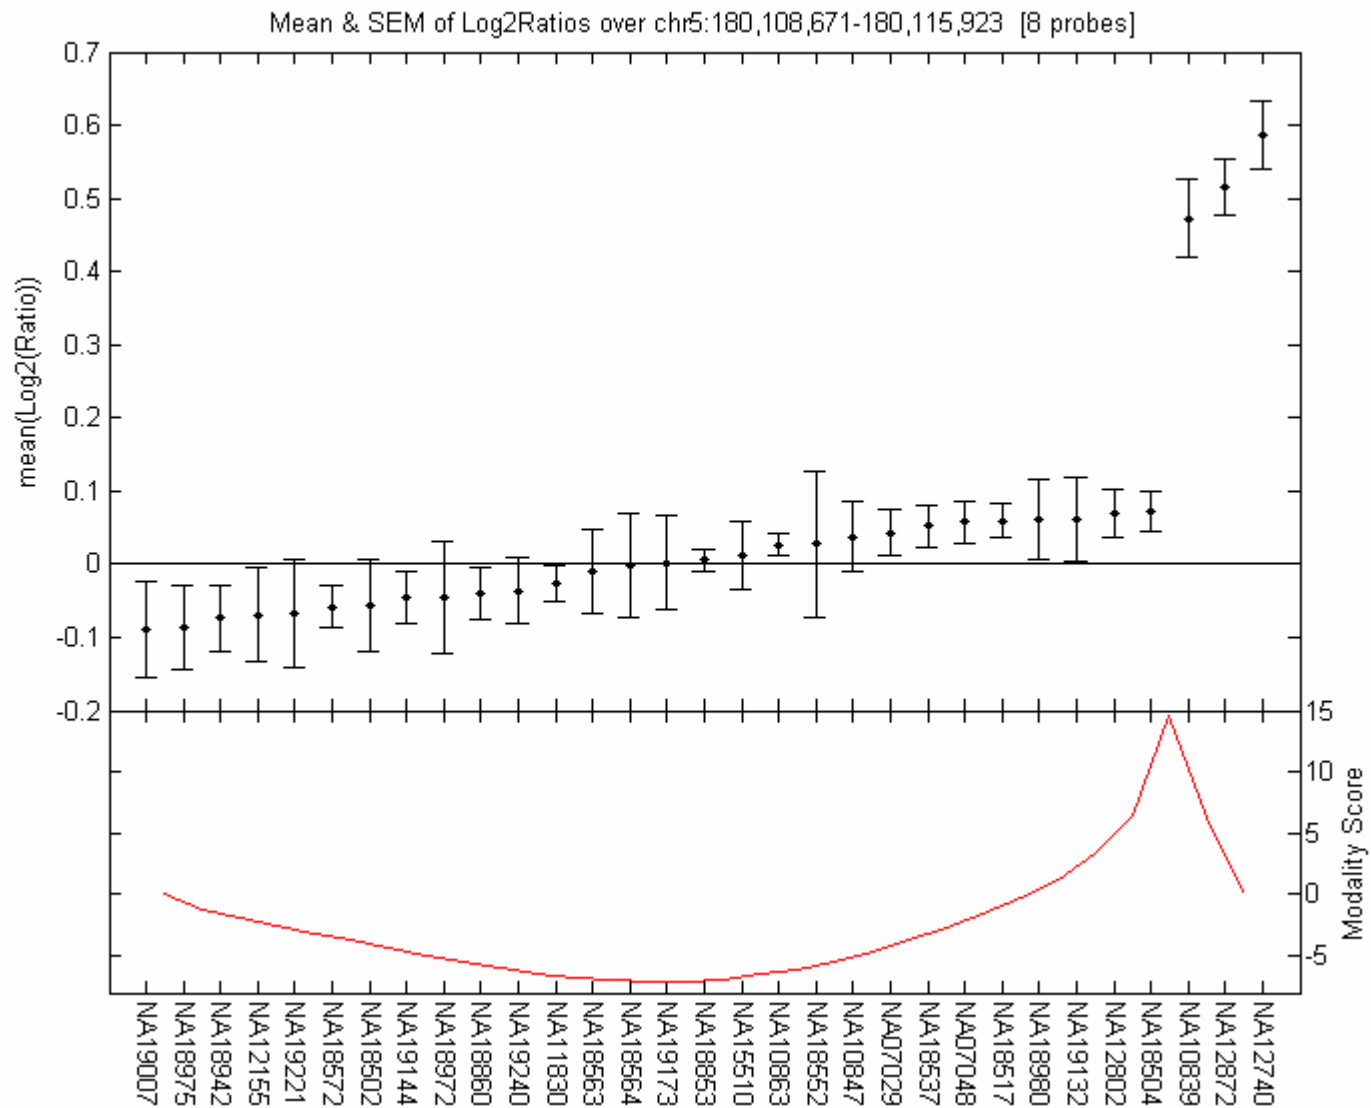

chr6:19,149,665-19,153,876 Score=27.7563

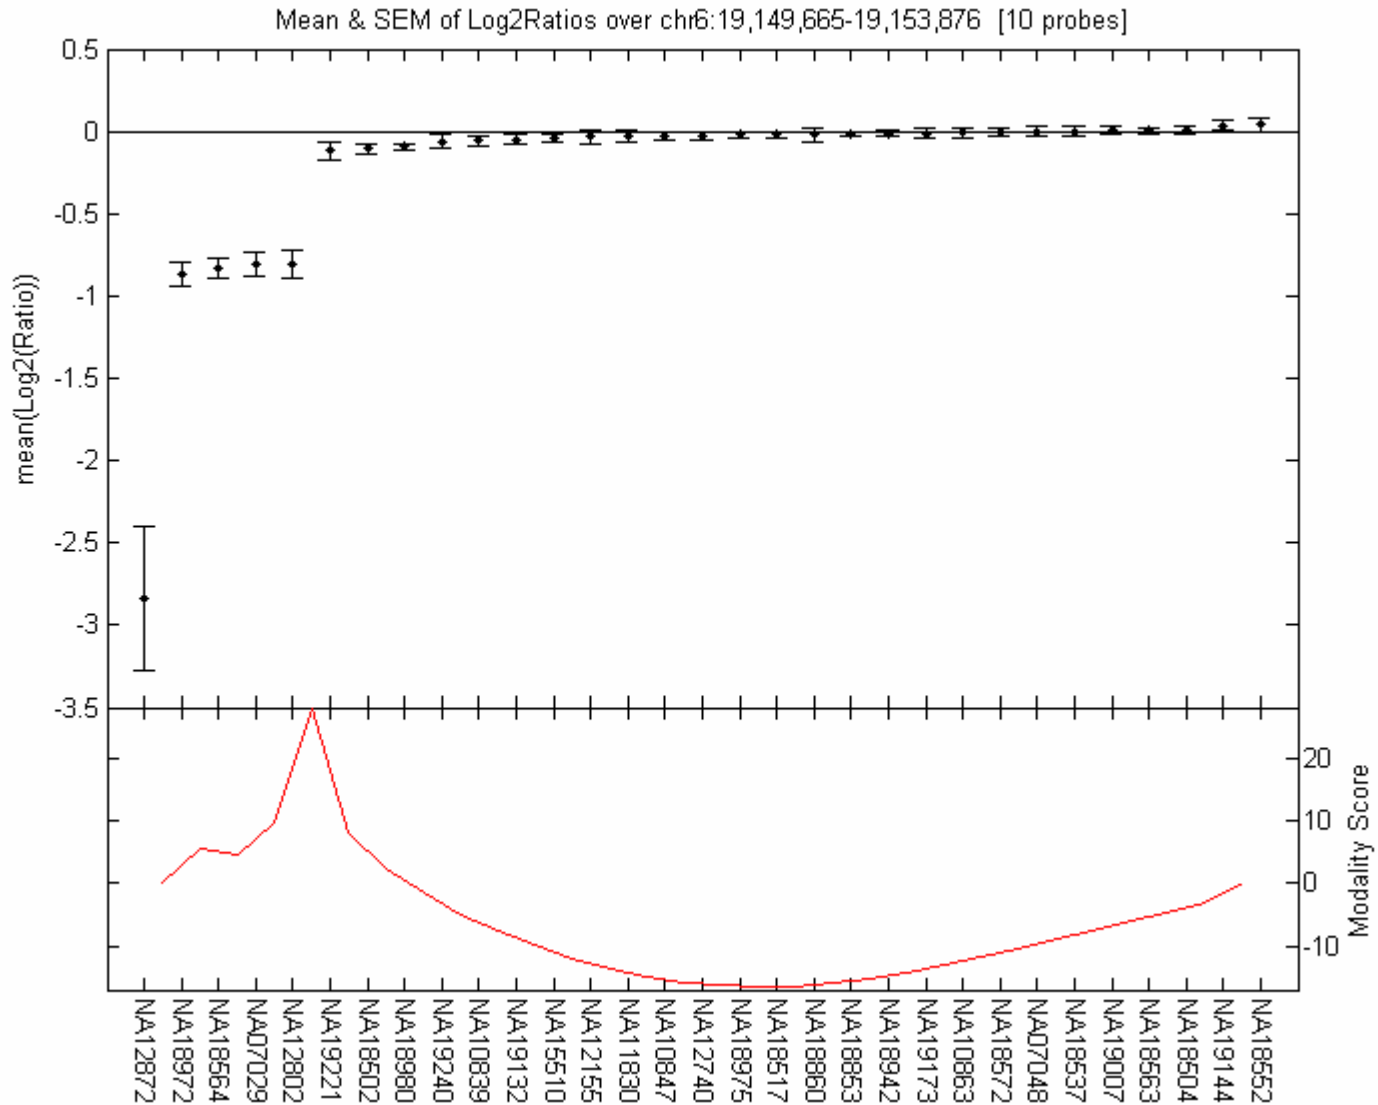

chr6:26,765,013-26,766,181 Score=12.5813

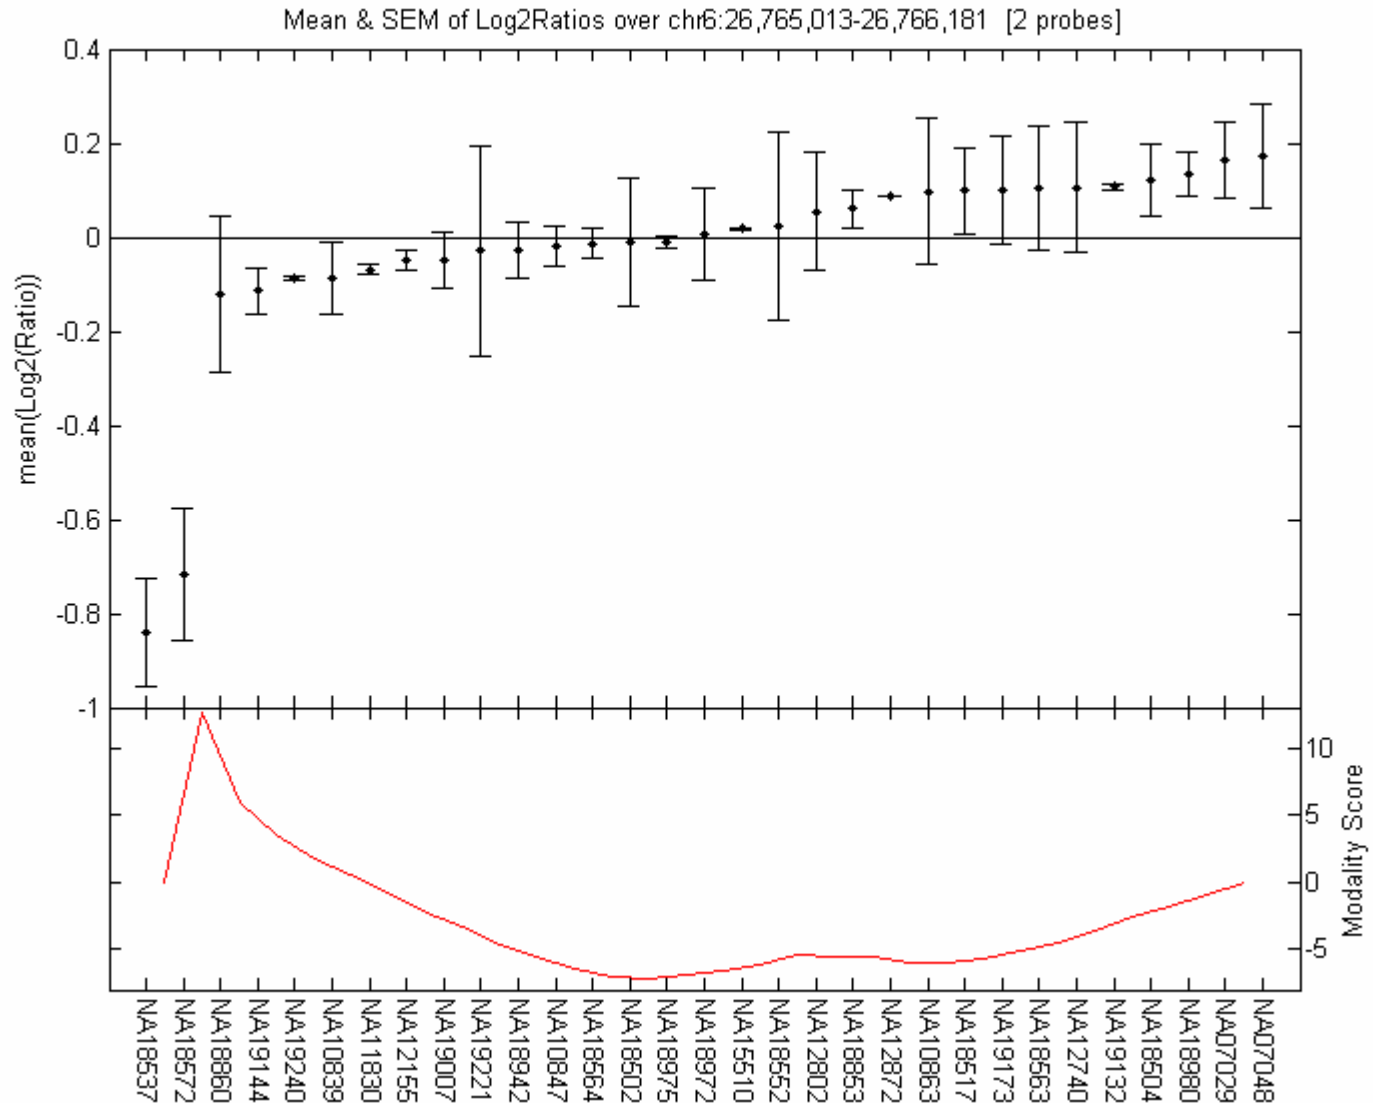

chr6:32,467,750-32,476,327 Score=12.0517

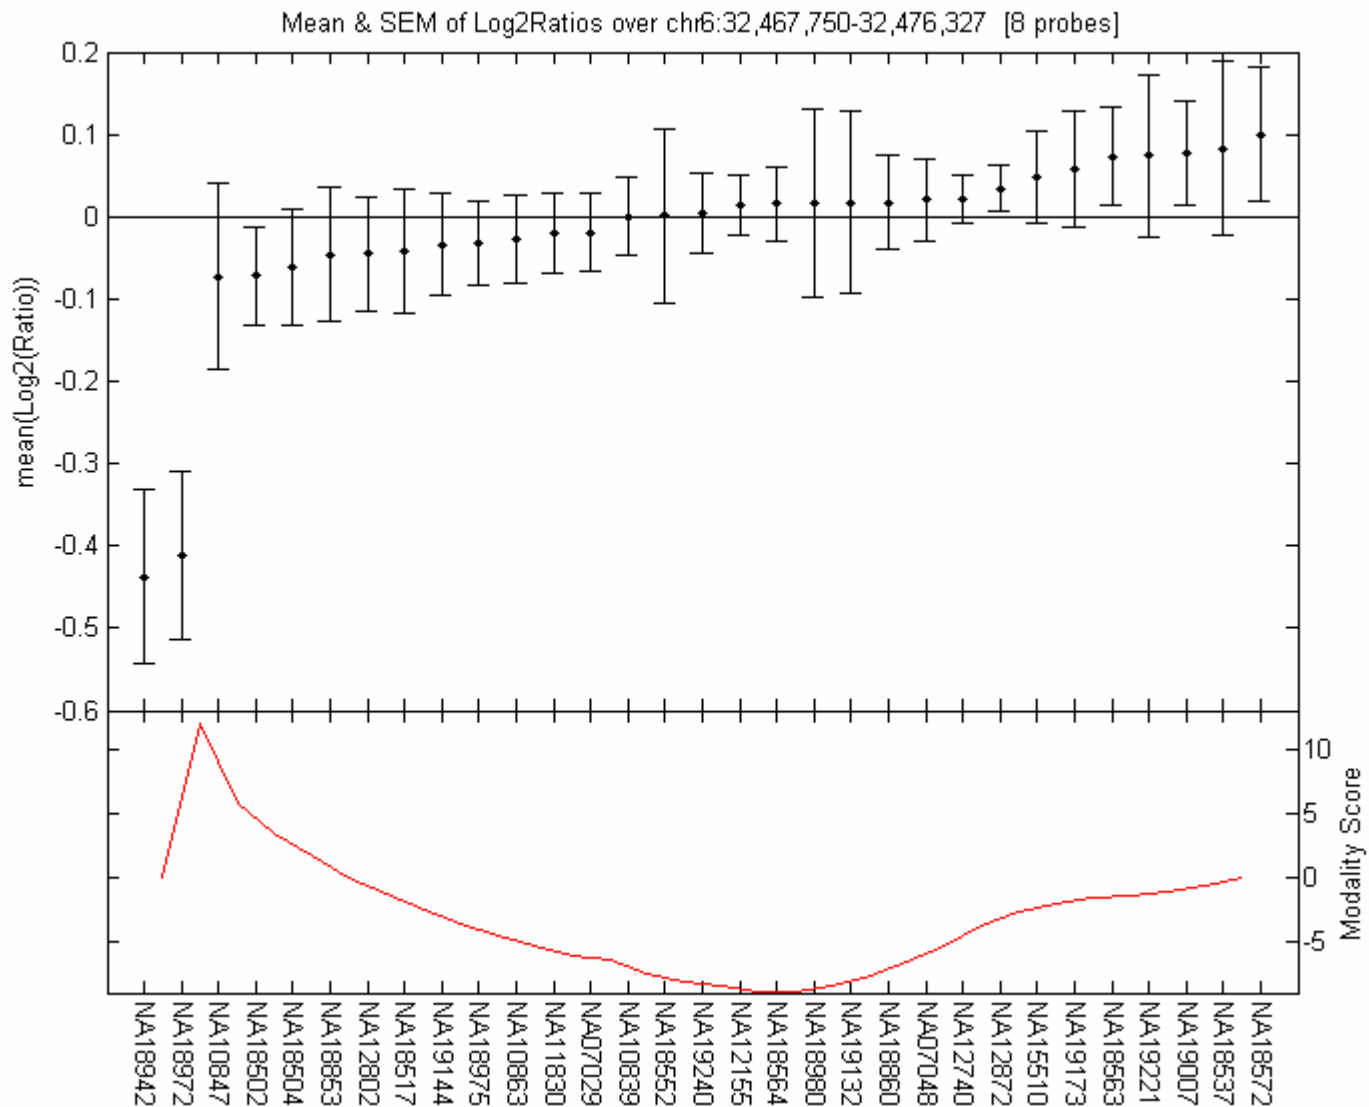



chr6:79,024,609-79,091,909 Score=22.569

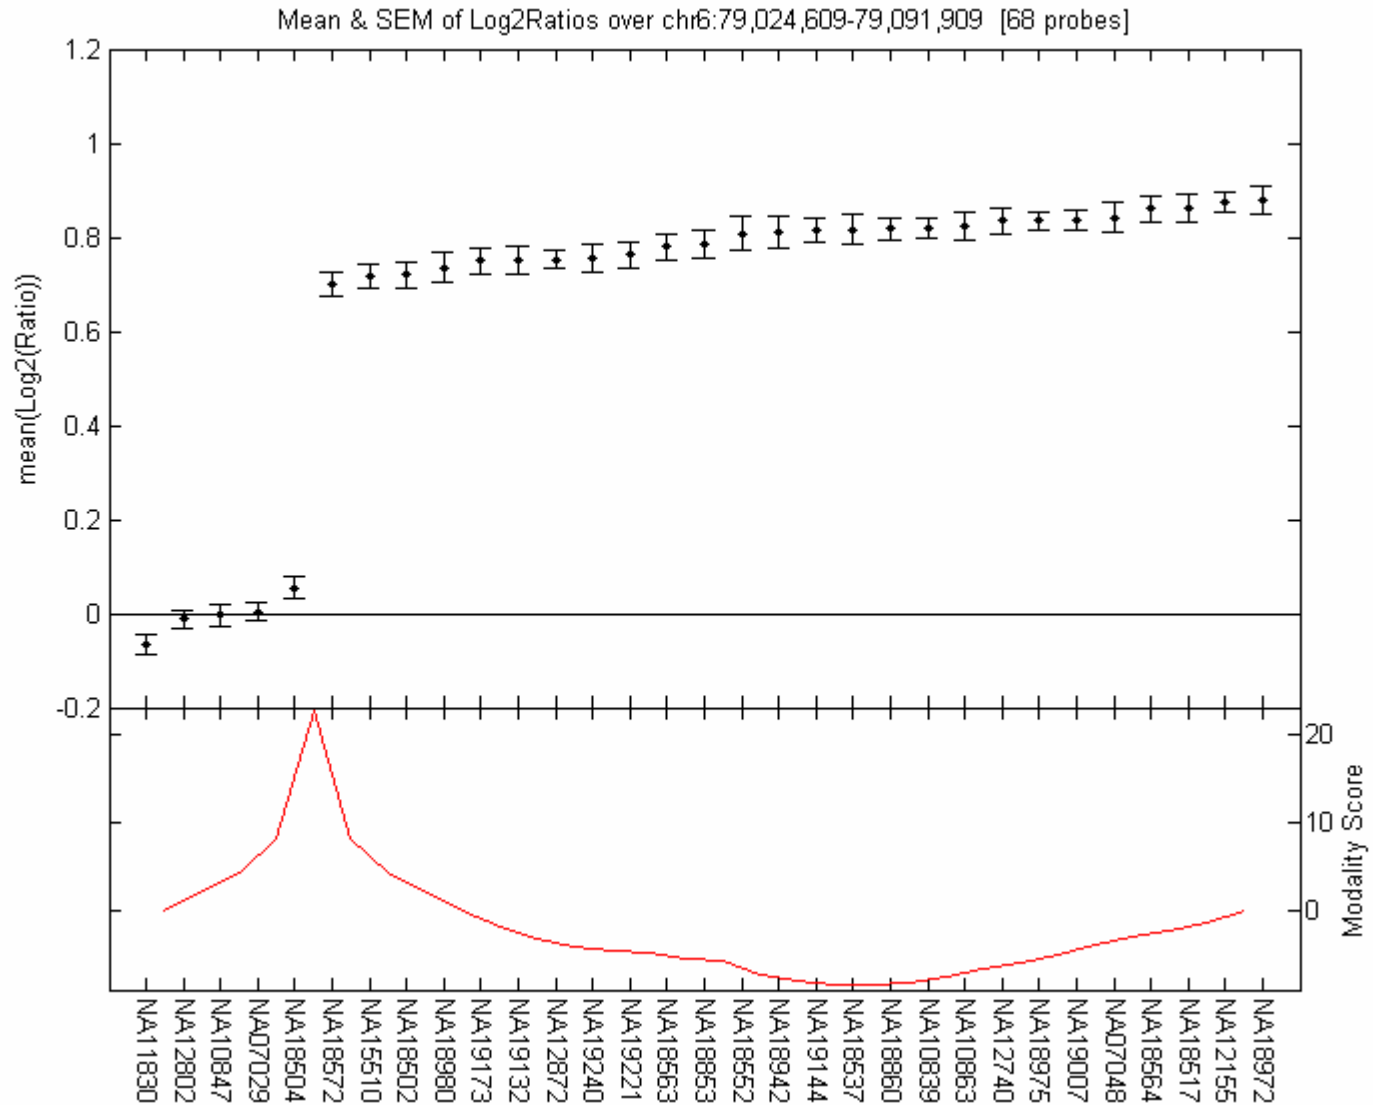

chr6:81,341,647-81,350,013 Score=17.4257

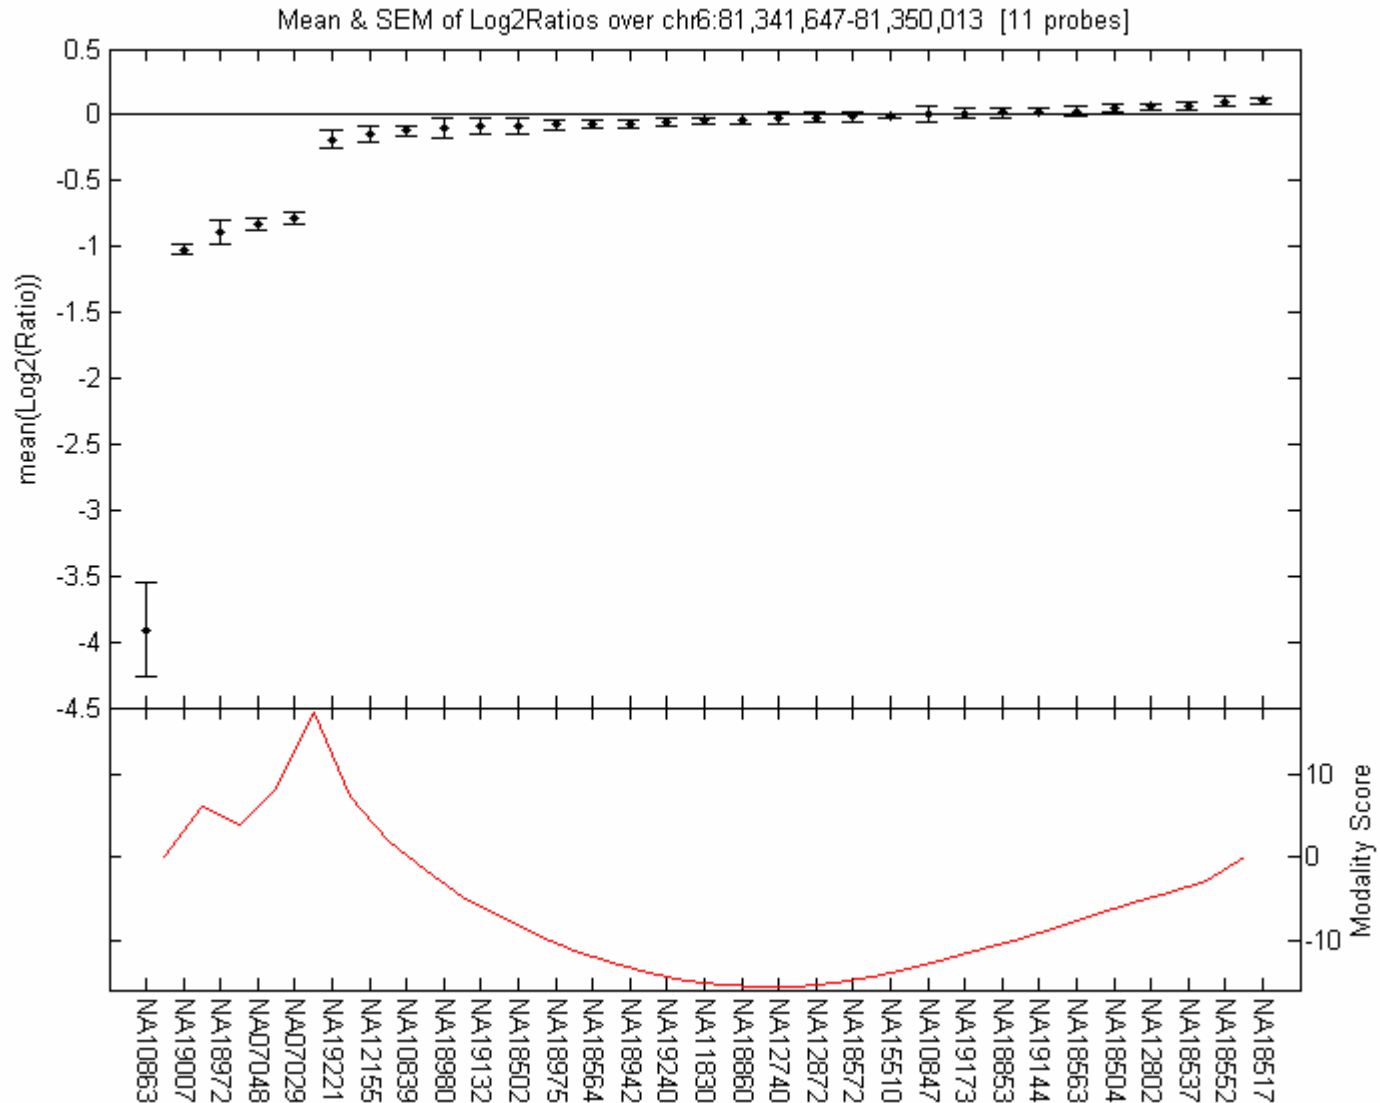

chr6:93,631,964-93,635,493 Score=12.5275

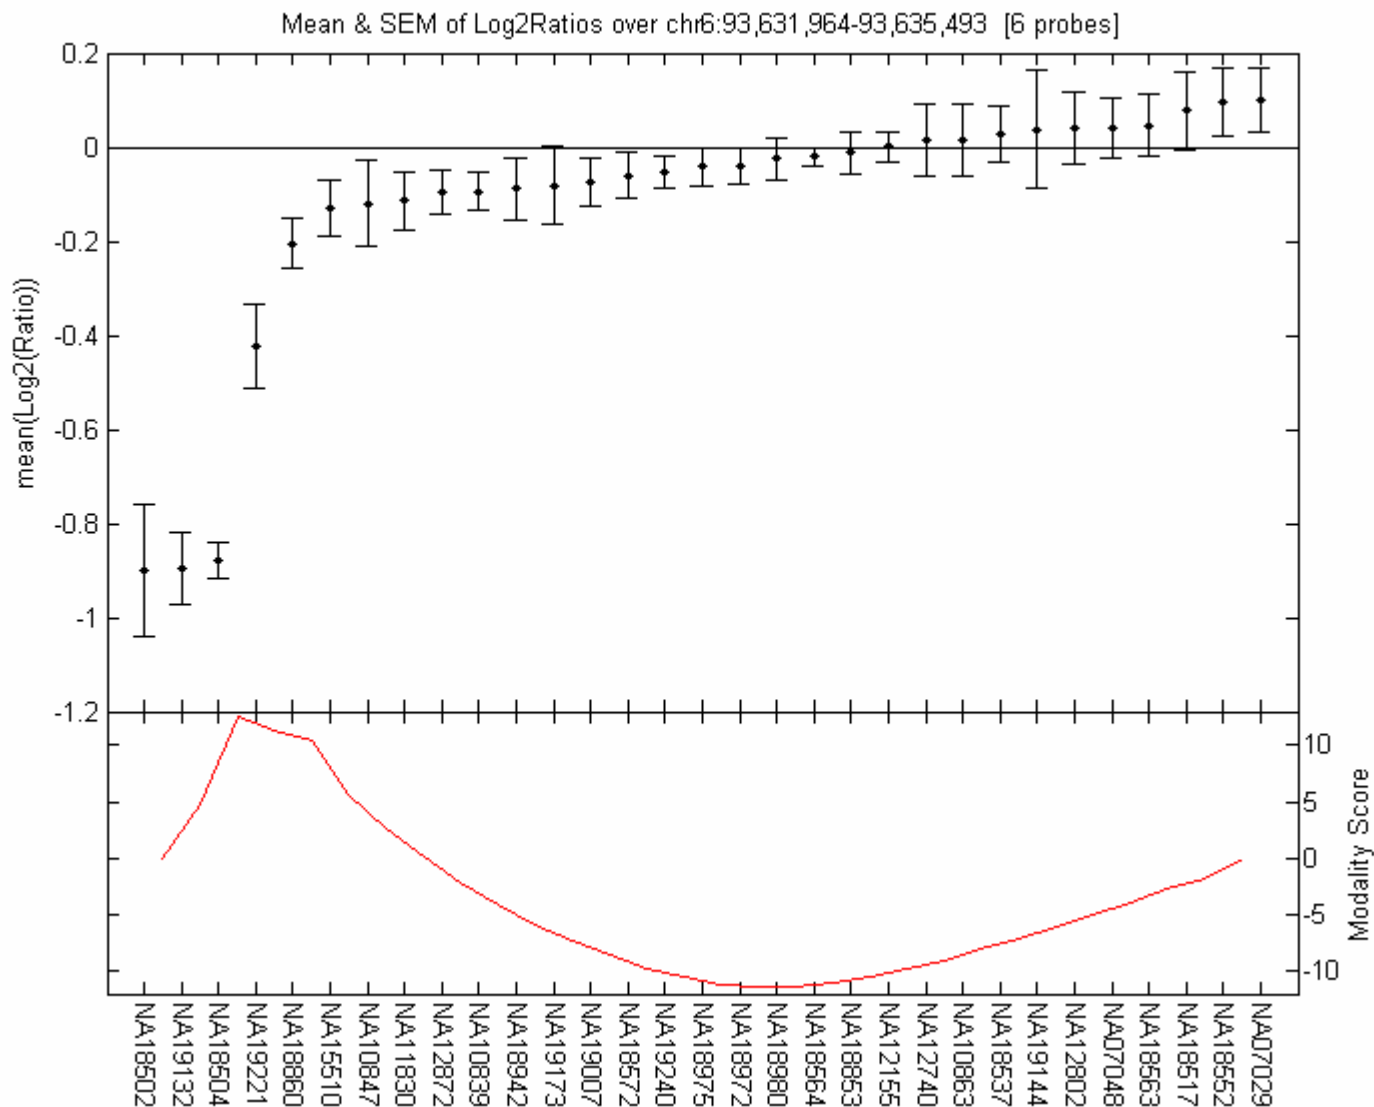

chr6:95,345,998-95,348,106 Score=19.321

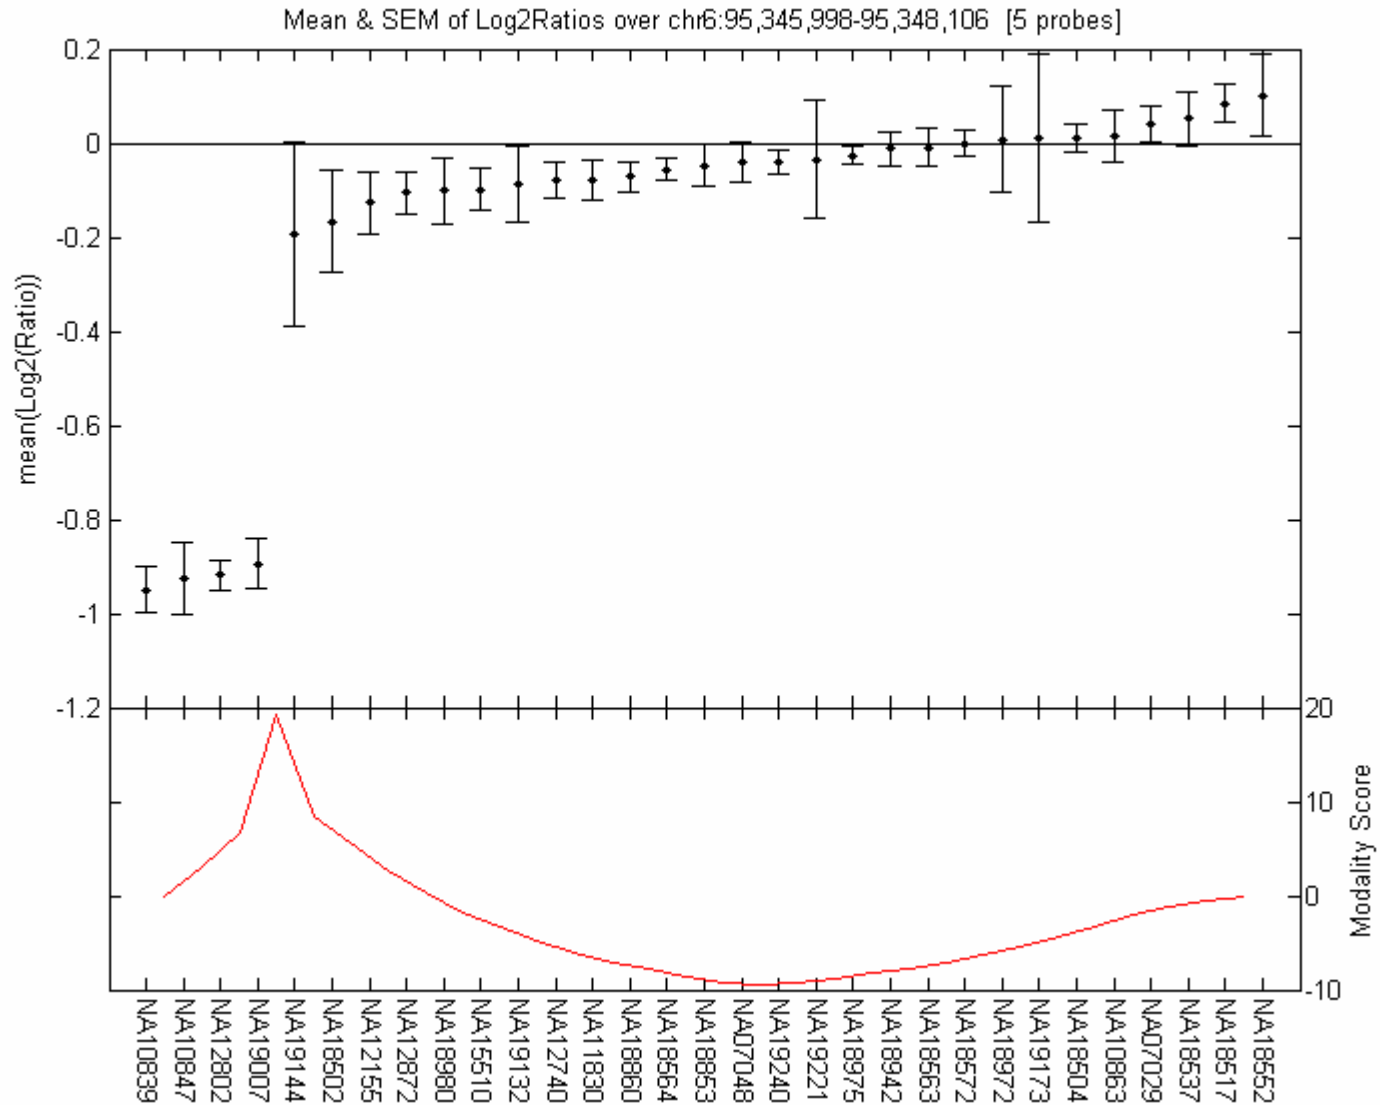

chr6:102,041,544-102,045,198 Score=15.3623

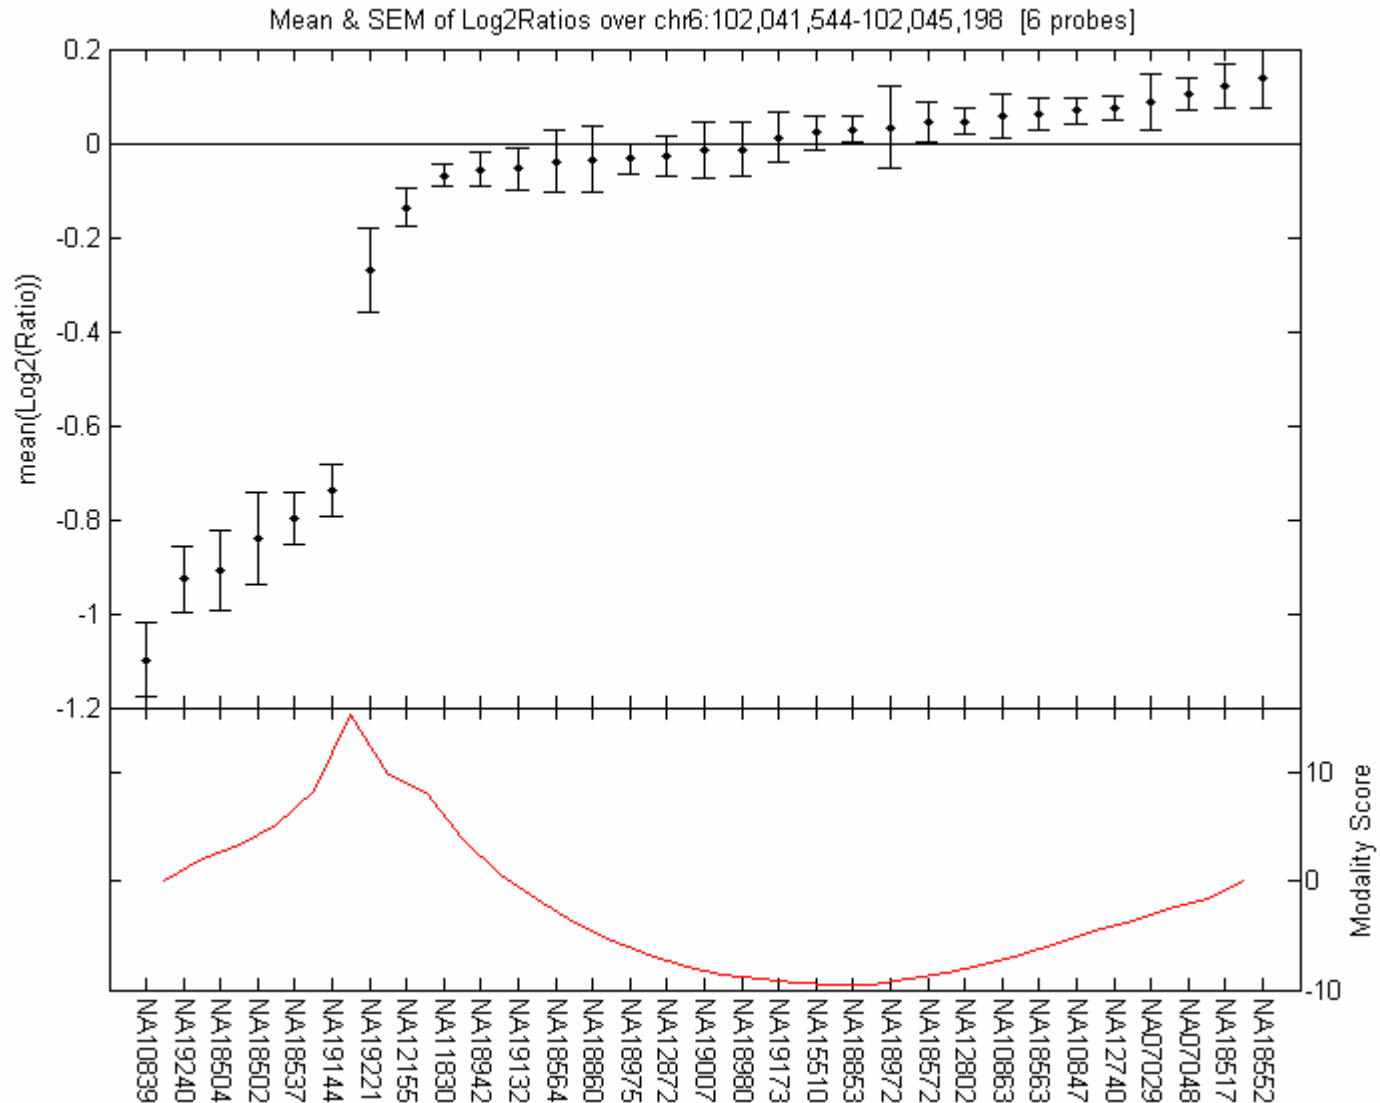

chr6:160,057,648-160,059,674 Score=9.9145

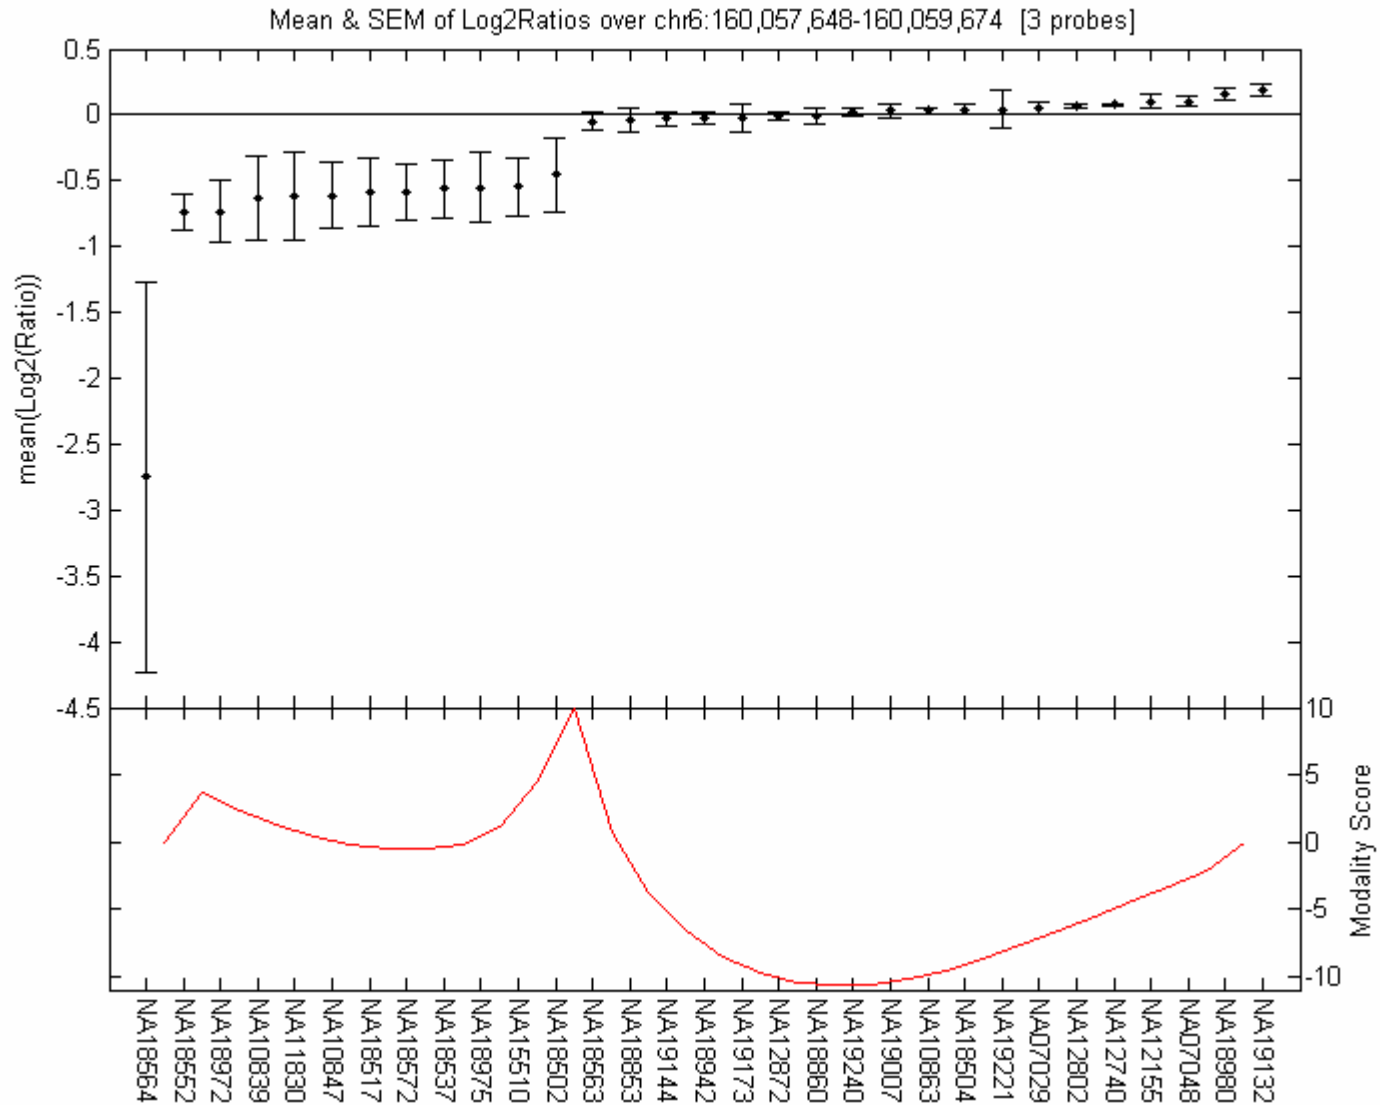

chr6:162,467,067-162,476,571 Score=13.7651

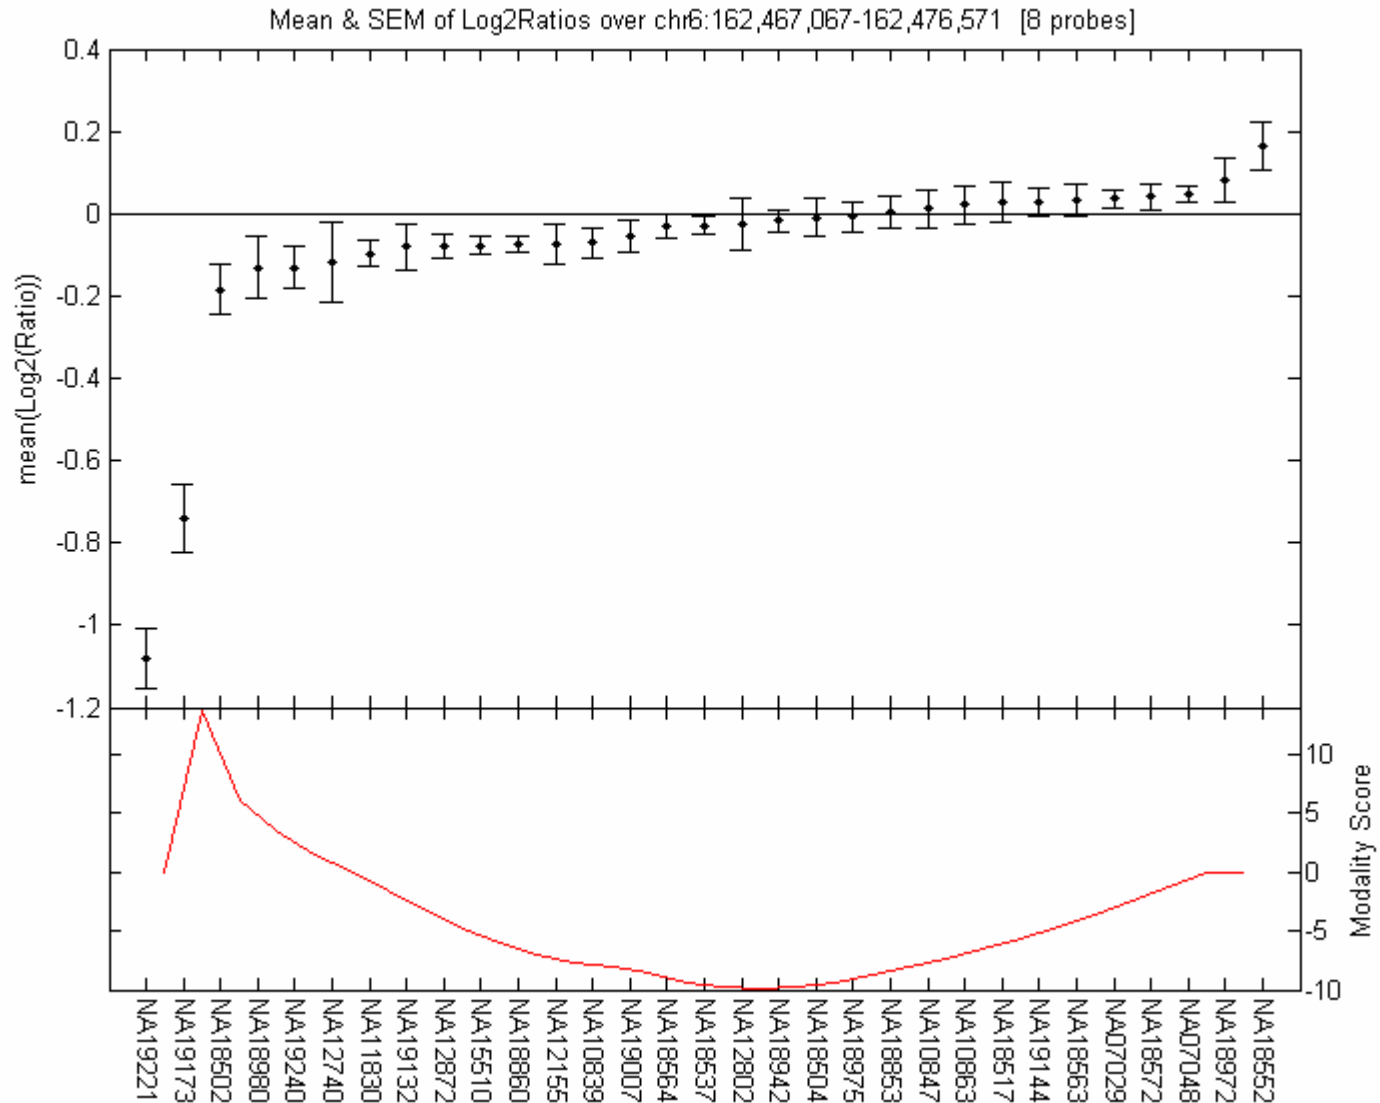

chr6:169,323,927-169,335,703 Score=19.0349

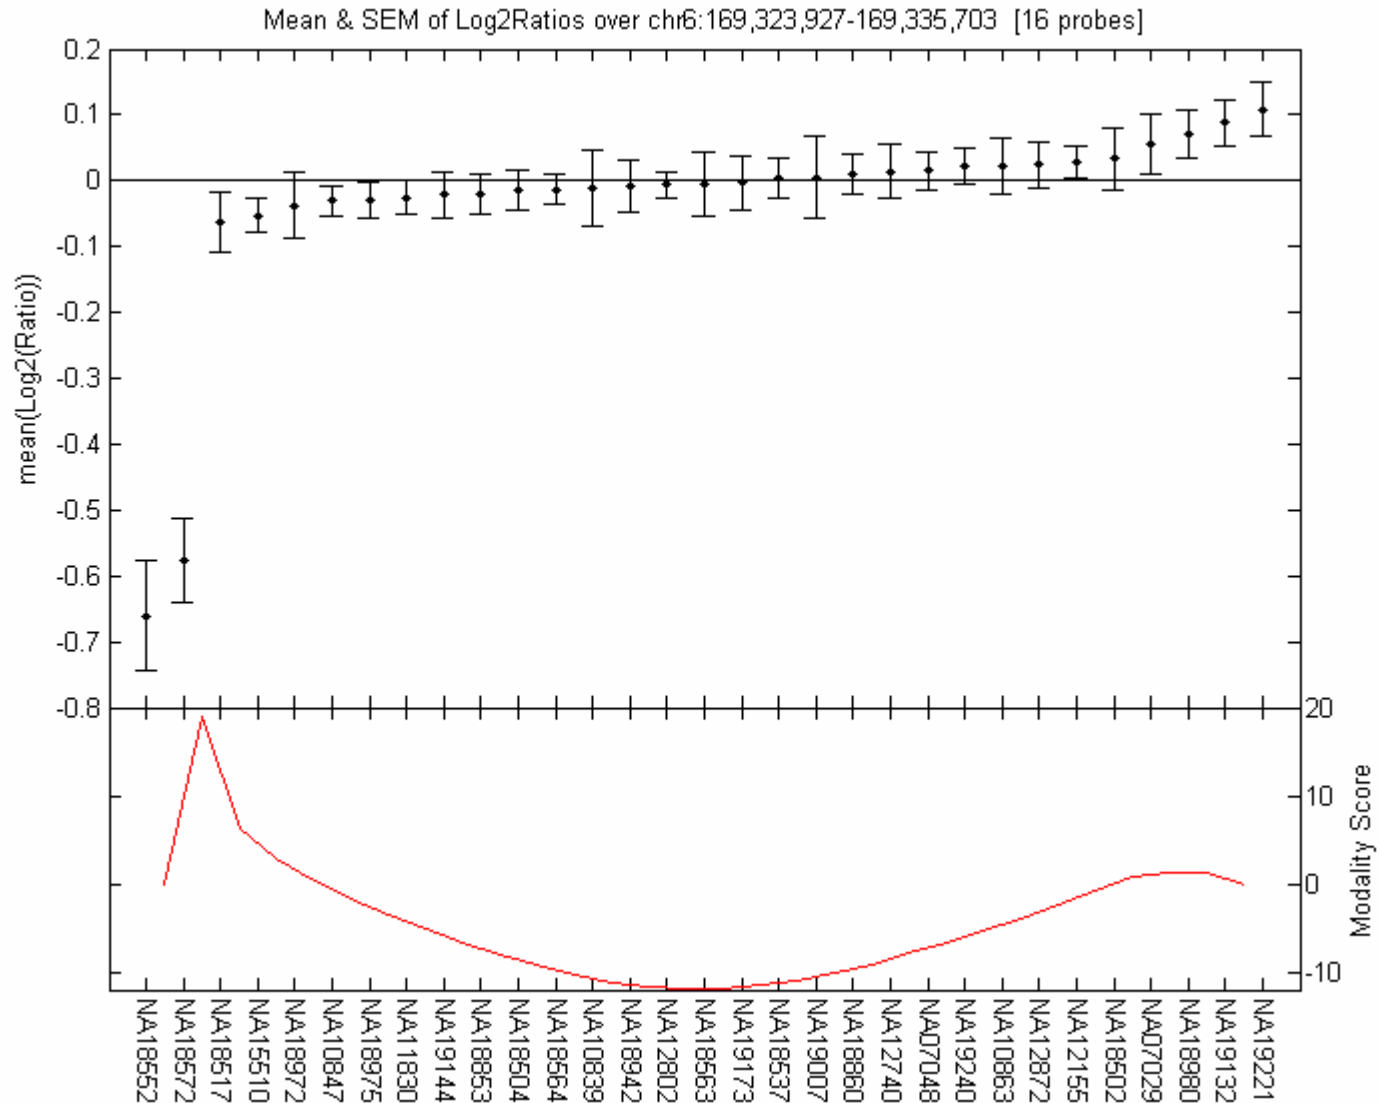



chr6:169,343,677-169,347,209 Score=15.3985

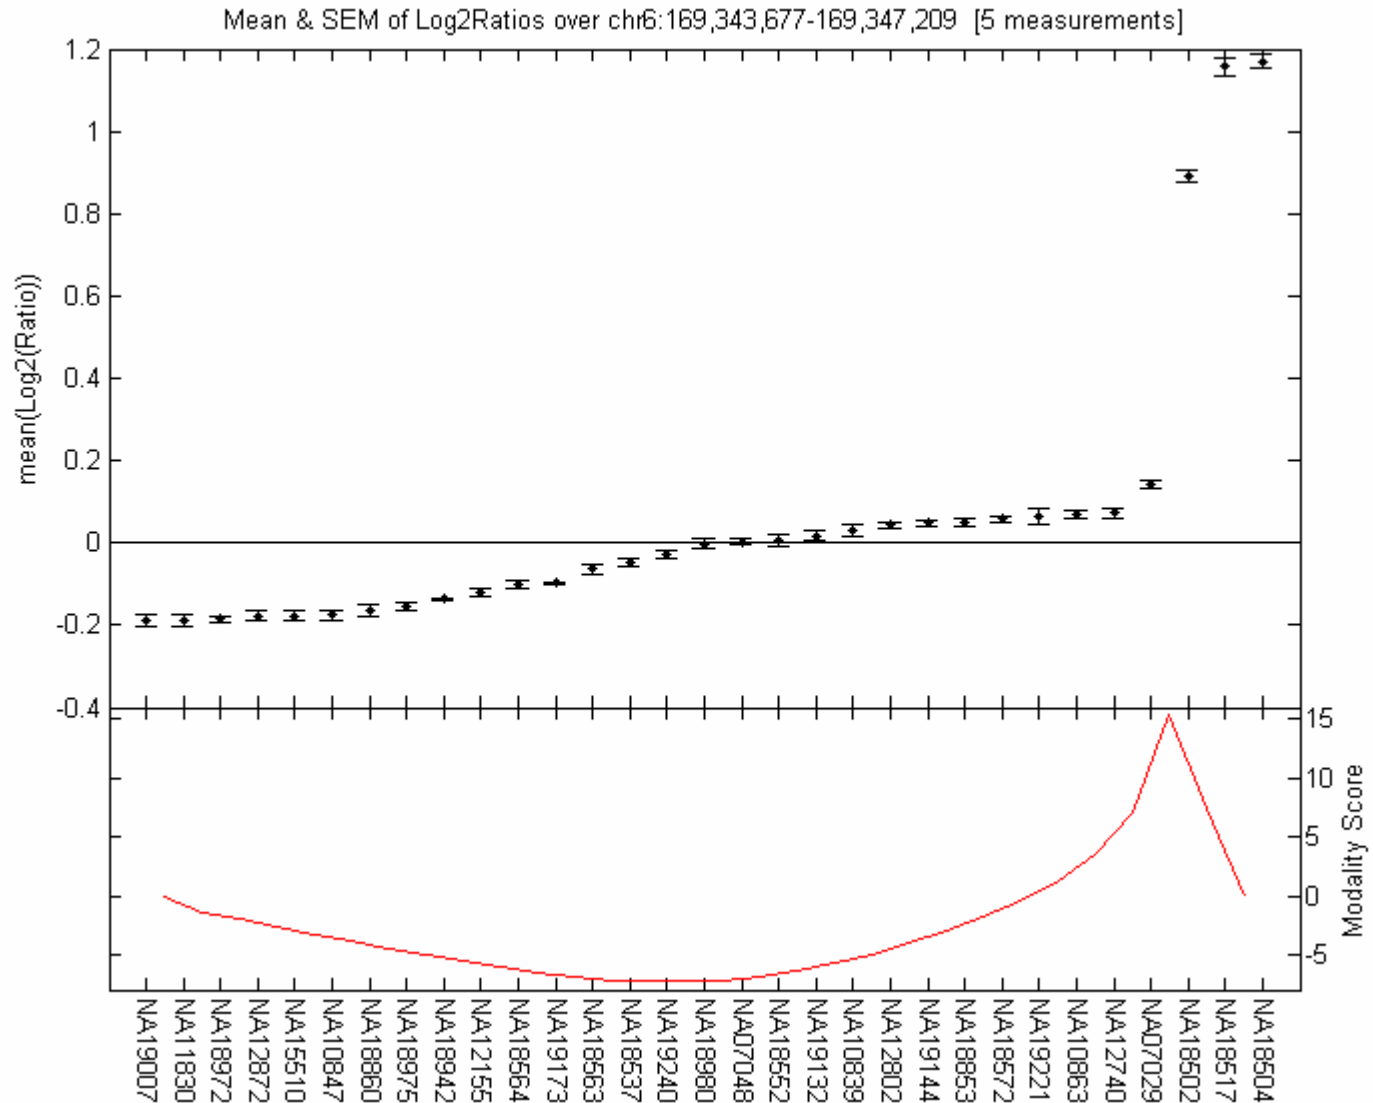



chr7:14,863,034-14,864,375 Score=15.2948

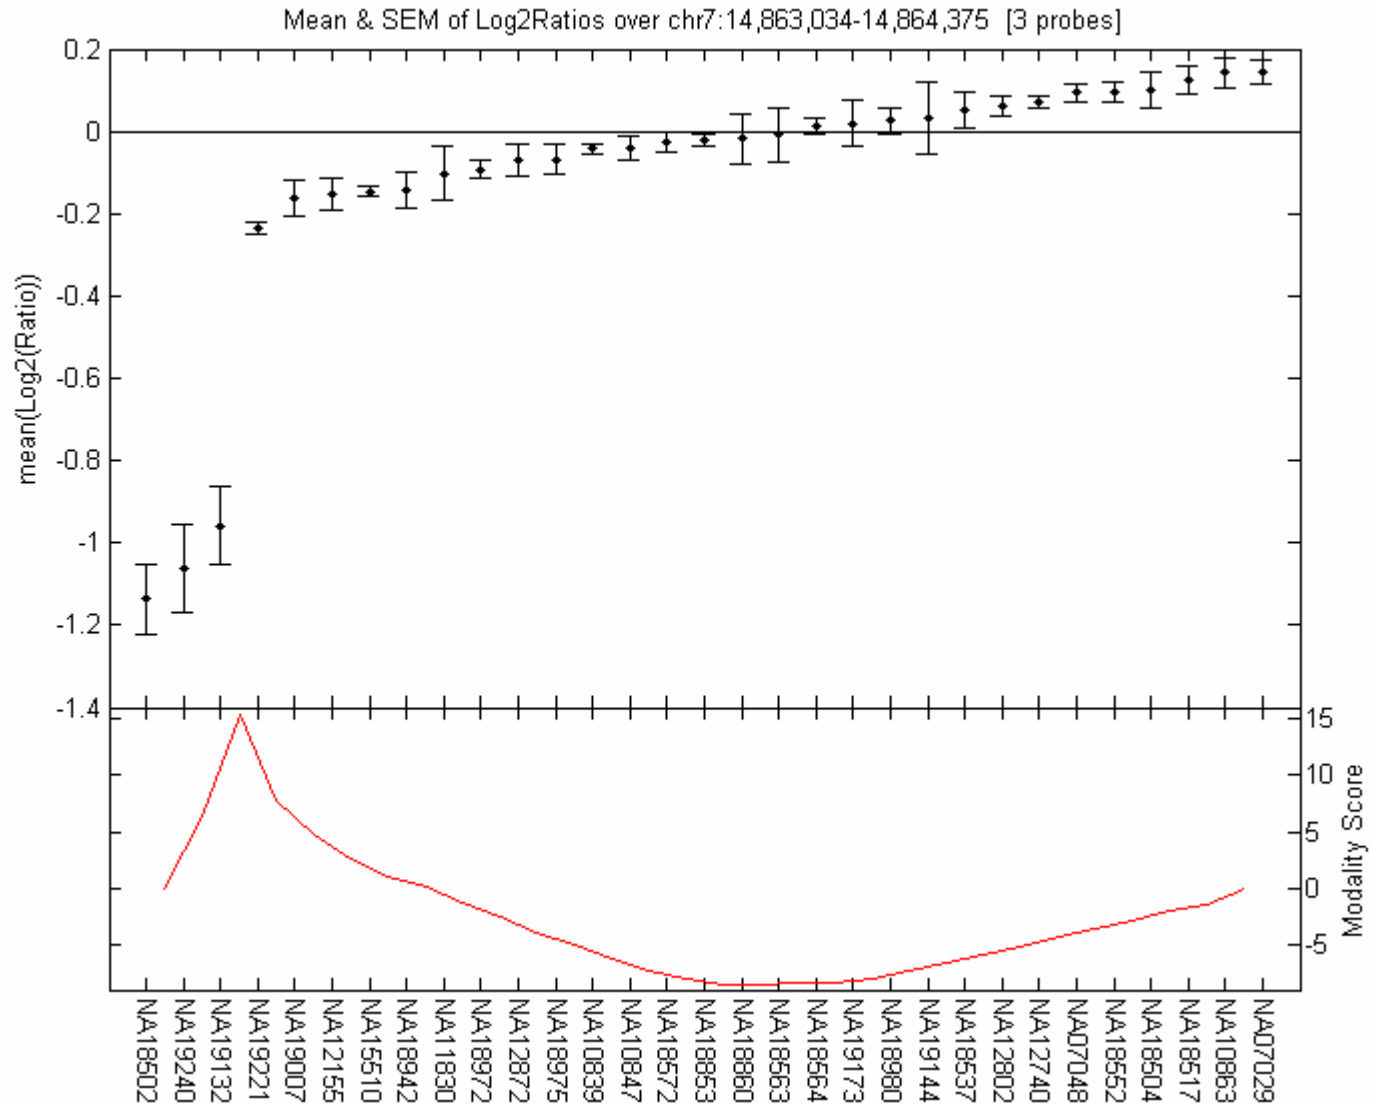

chr7:71,488,100-71,489,994 Score=10.9964

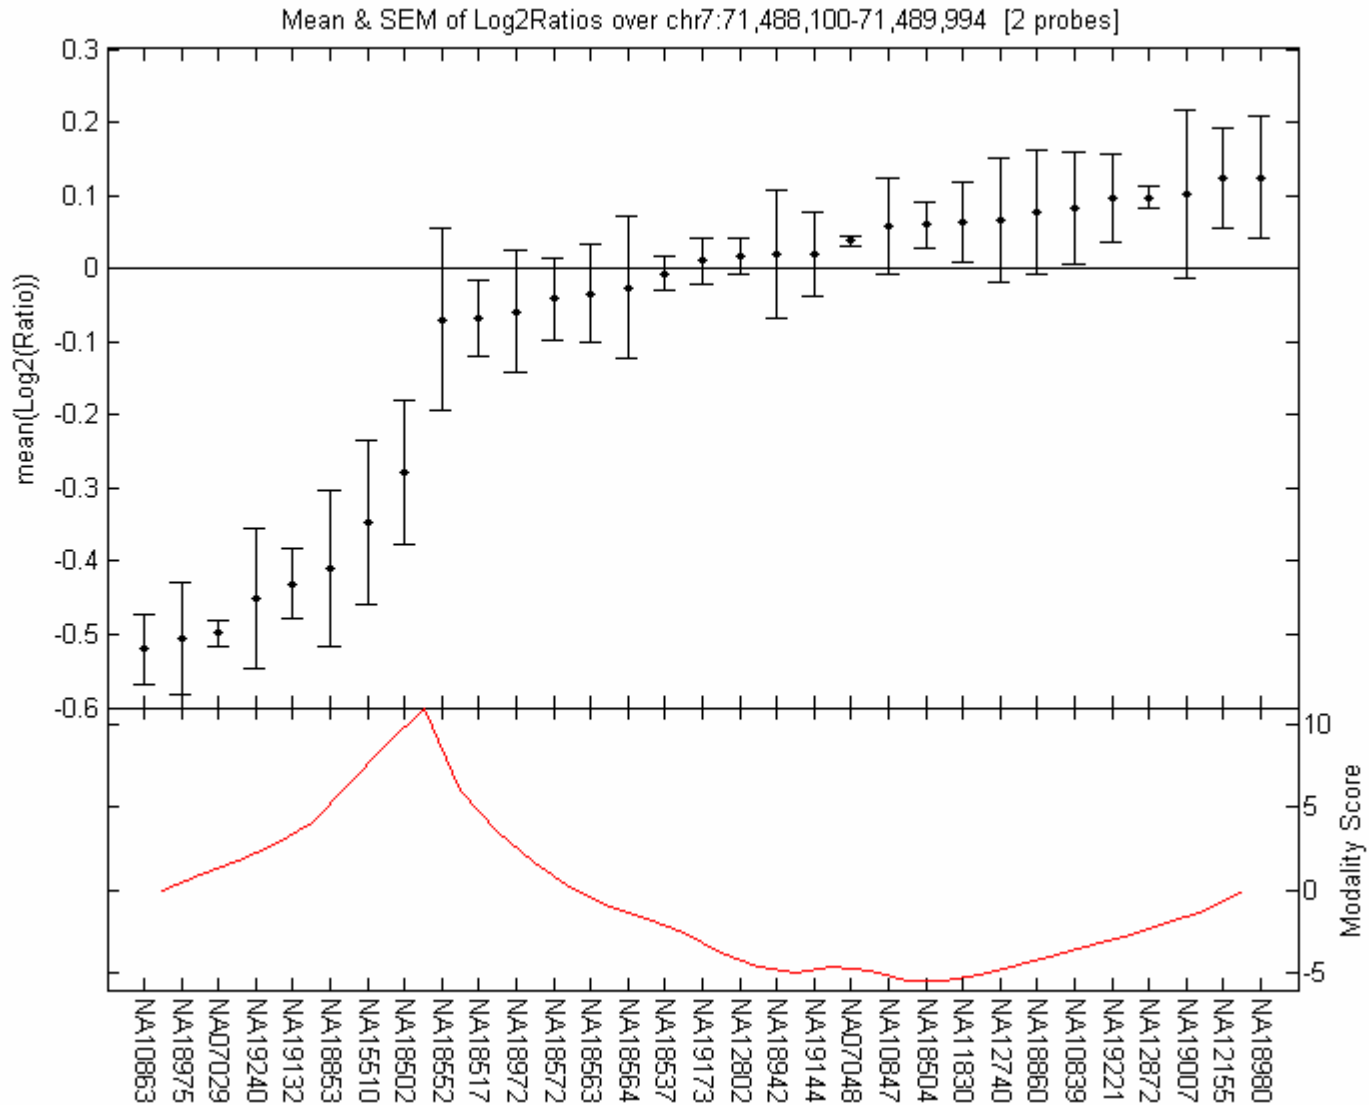

chr7:76,347,374-76,352,456 Score=14.5158

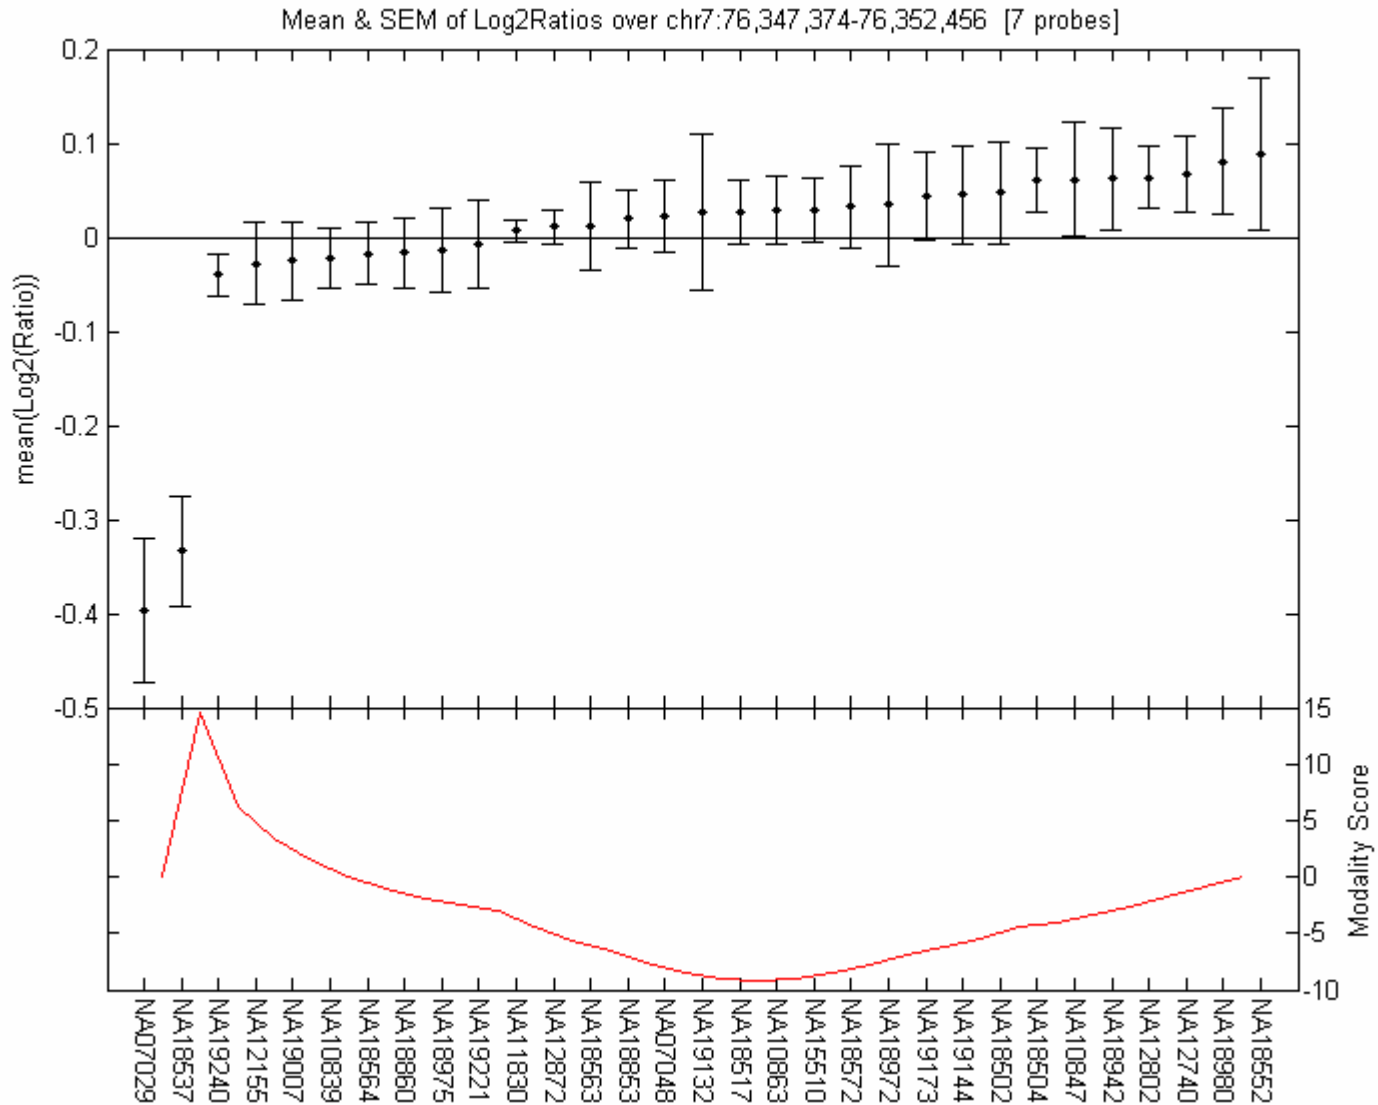

chr7:78,449,465-78,498,134 Score=21.1247

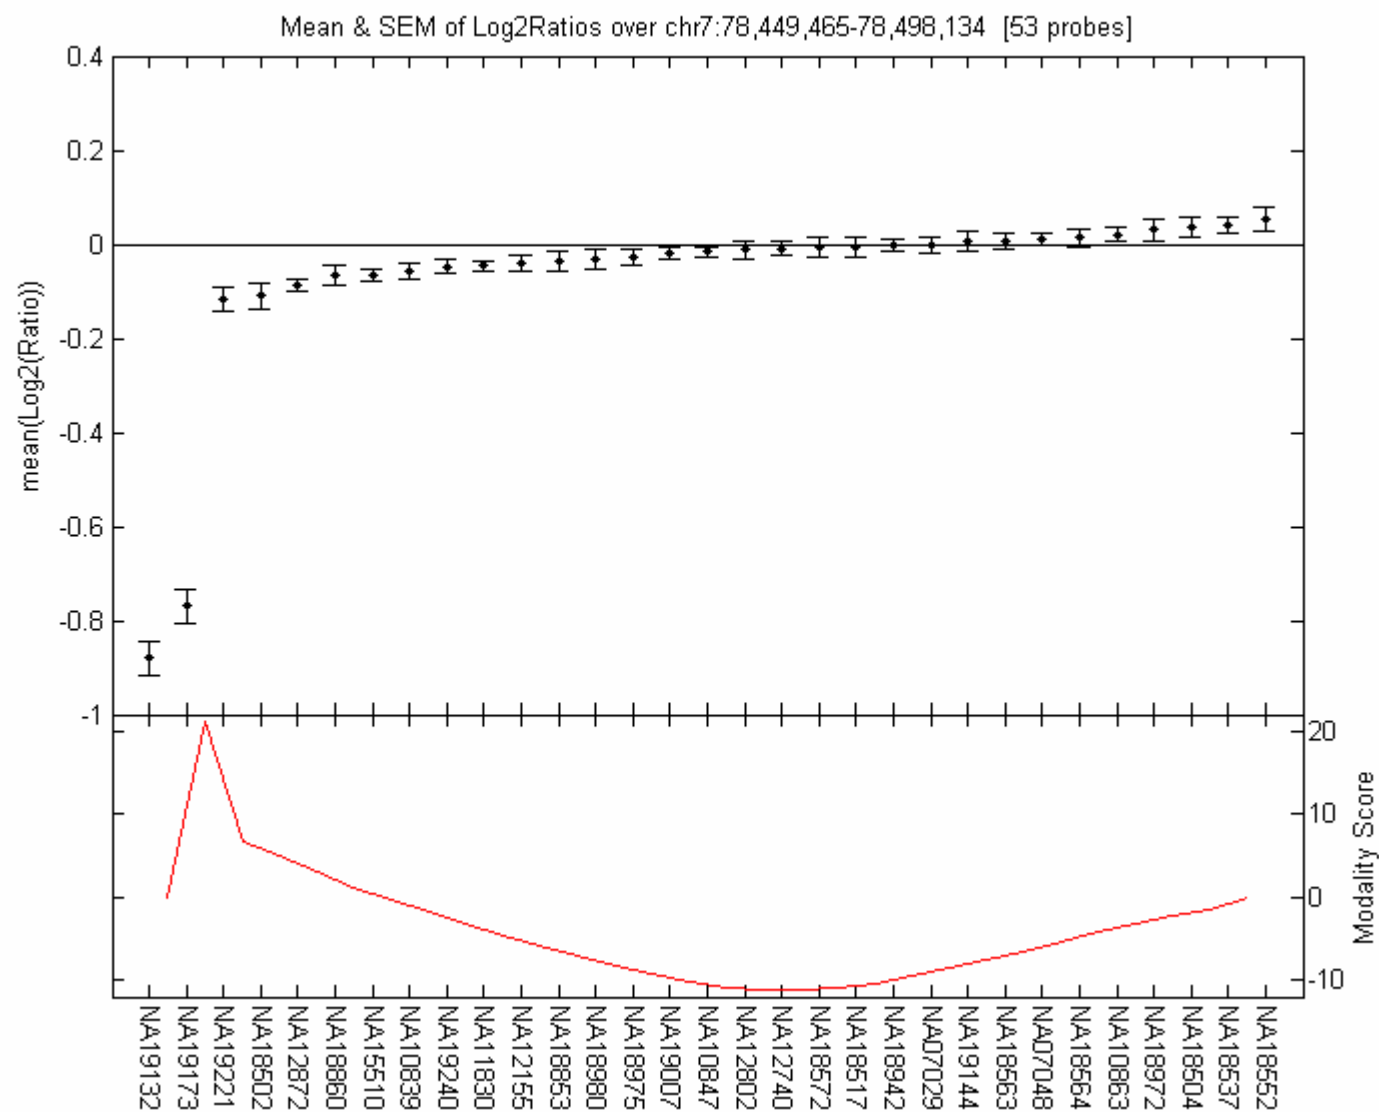

chr7:90,678,095-90,685,238 Score=16.7964

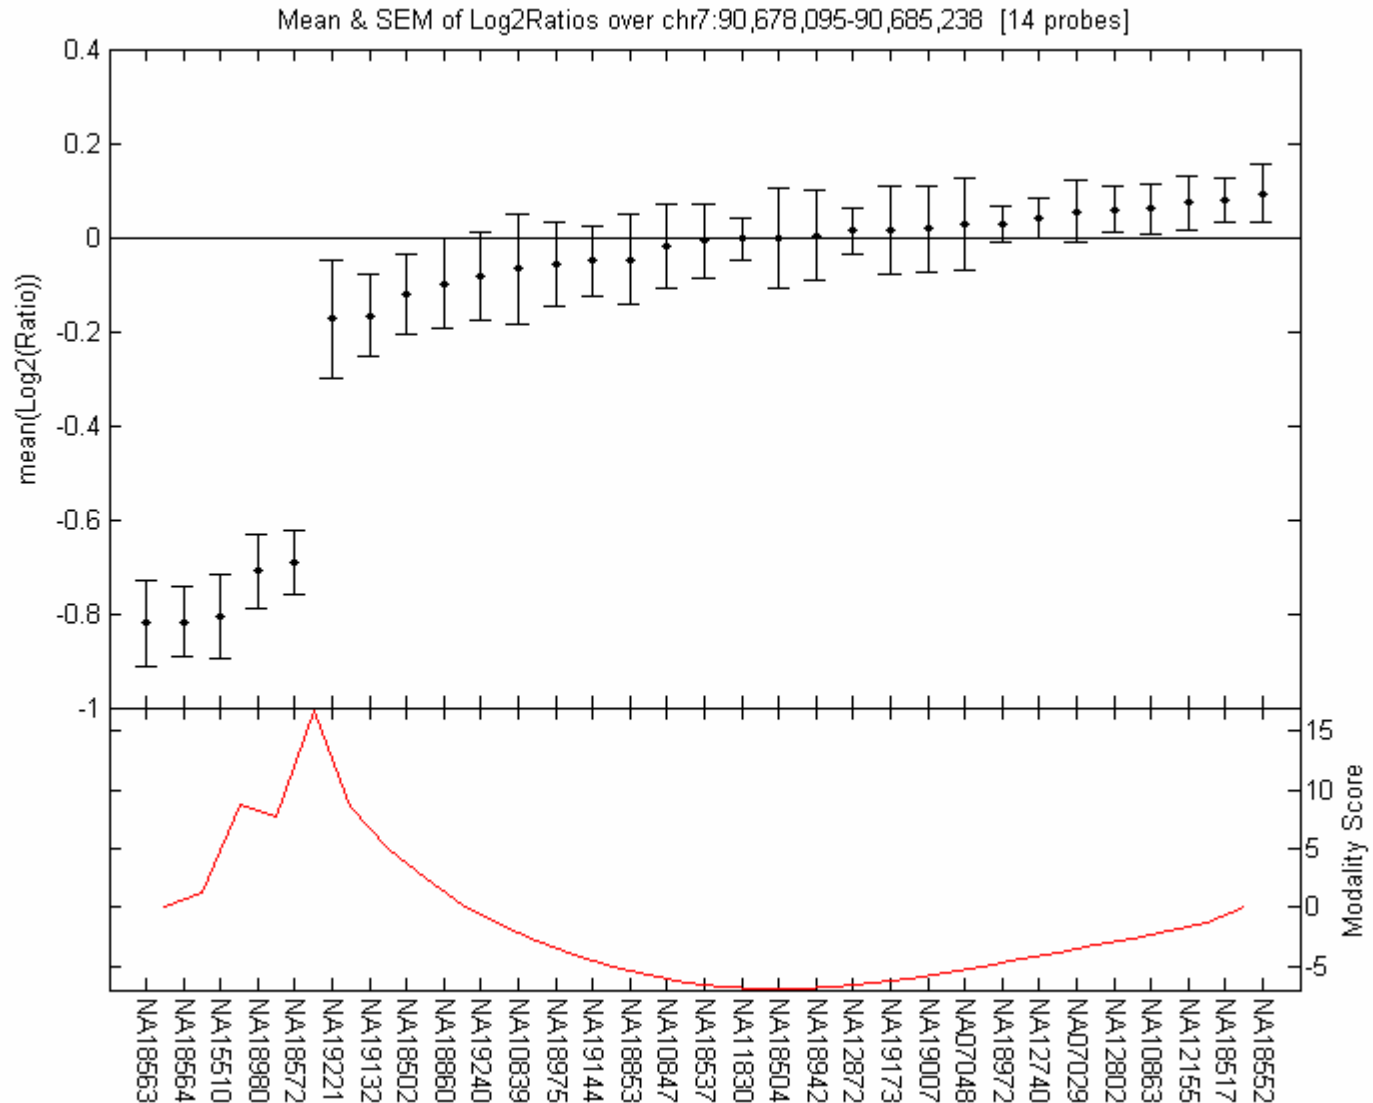

chr7:97,032,531-97,046,973 Score=17.0769

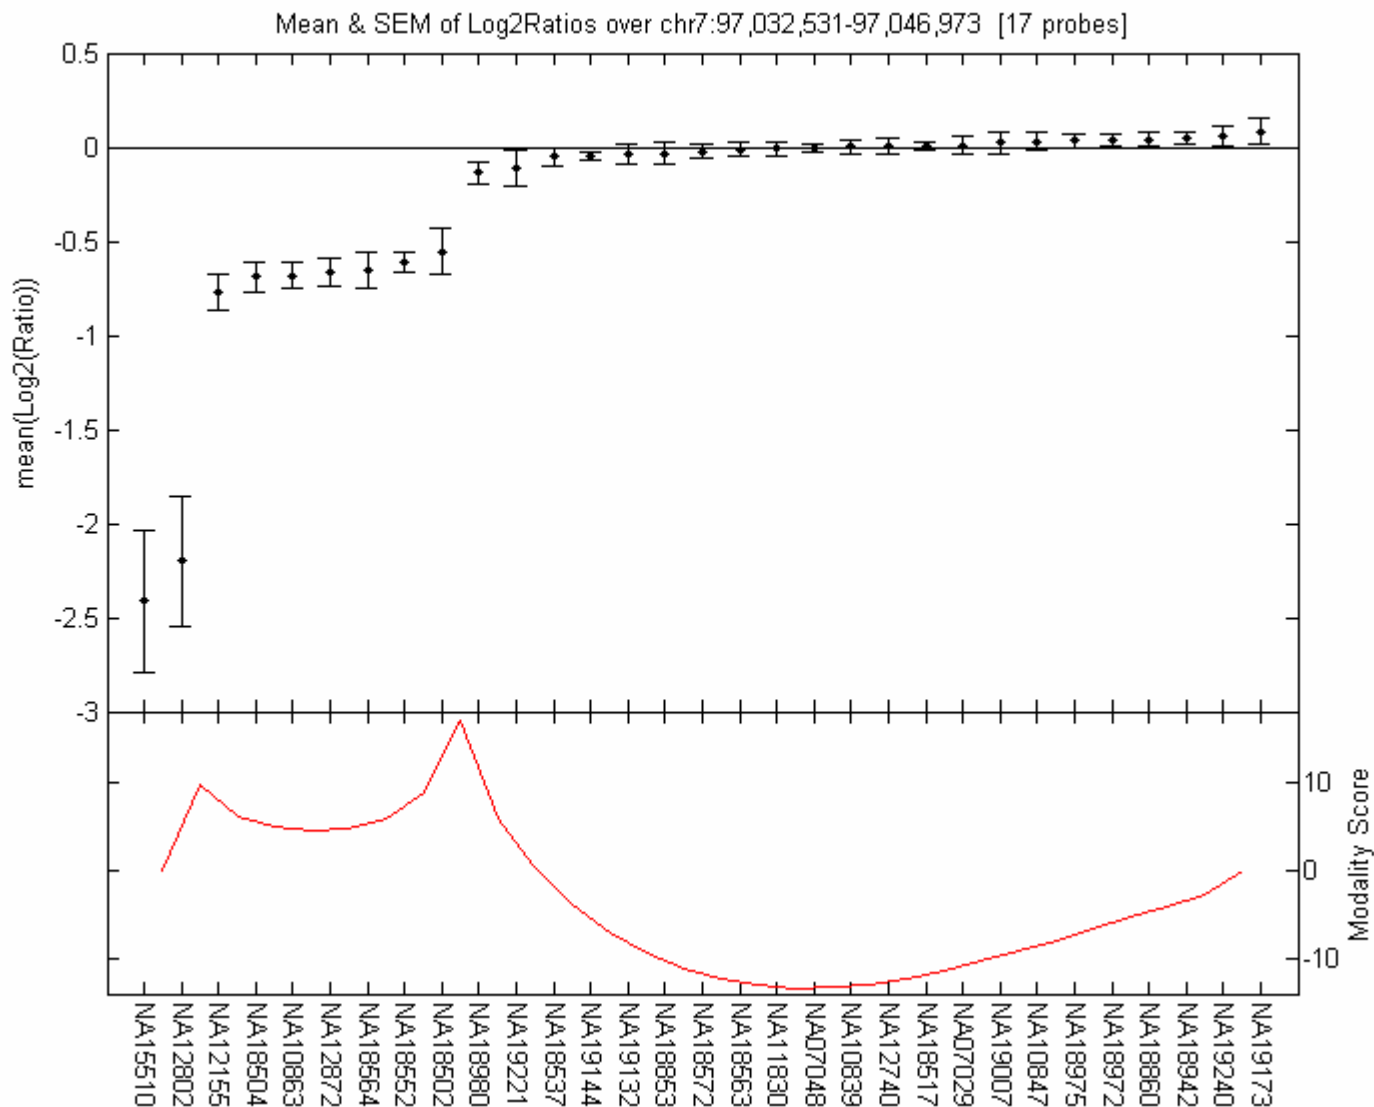



chr7:104,059,447-104,070,406 Score=25.6329

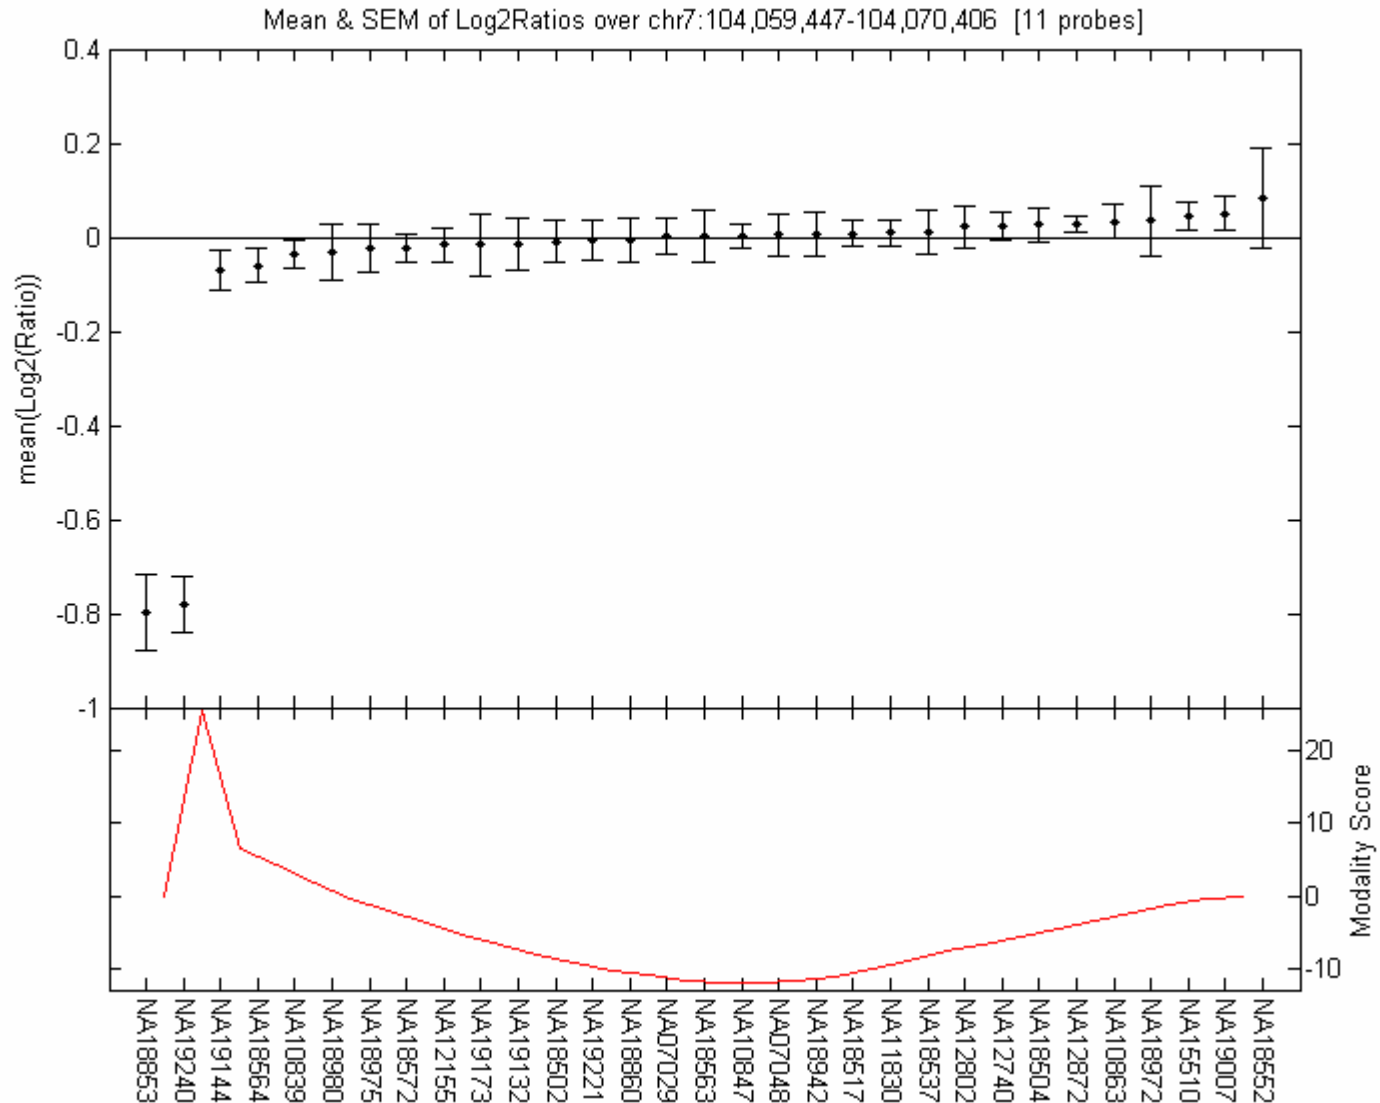

chr7:109,776,936-109,782,301 Score=10.6577

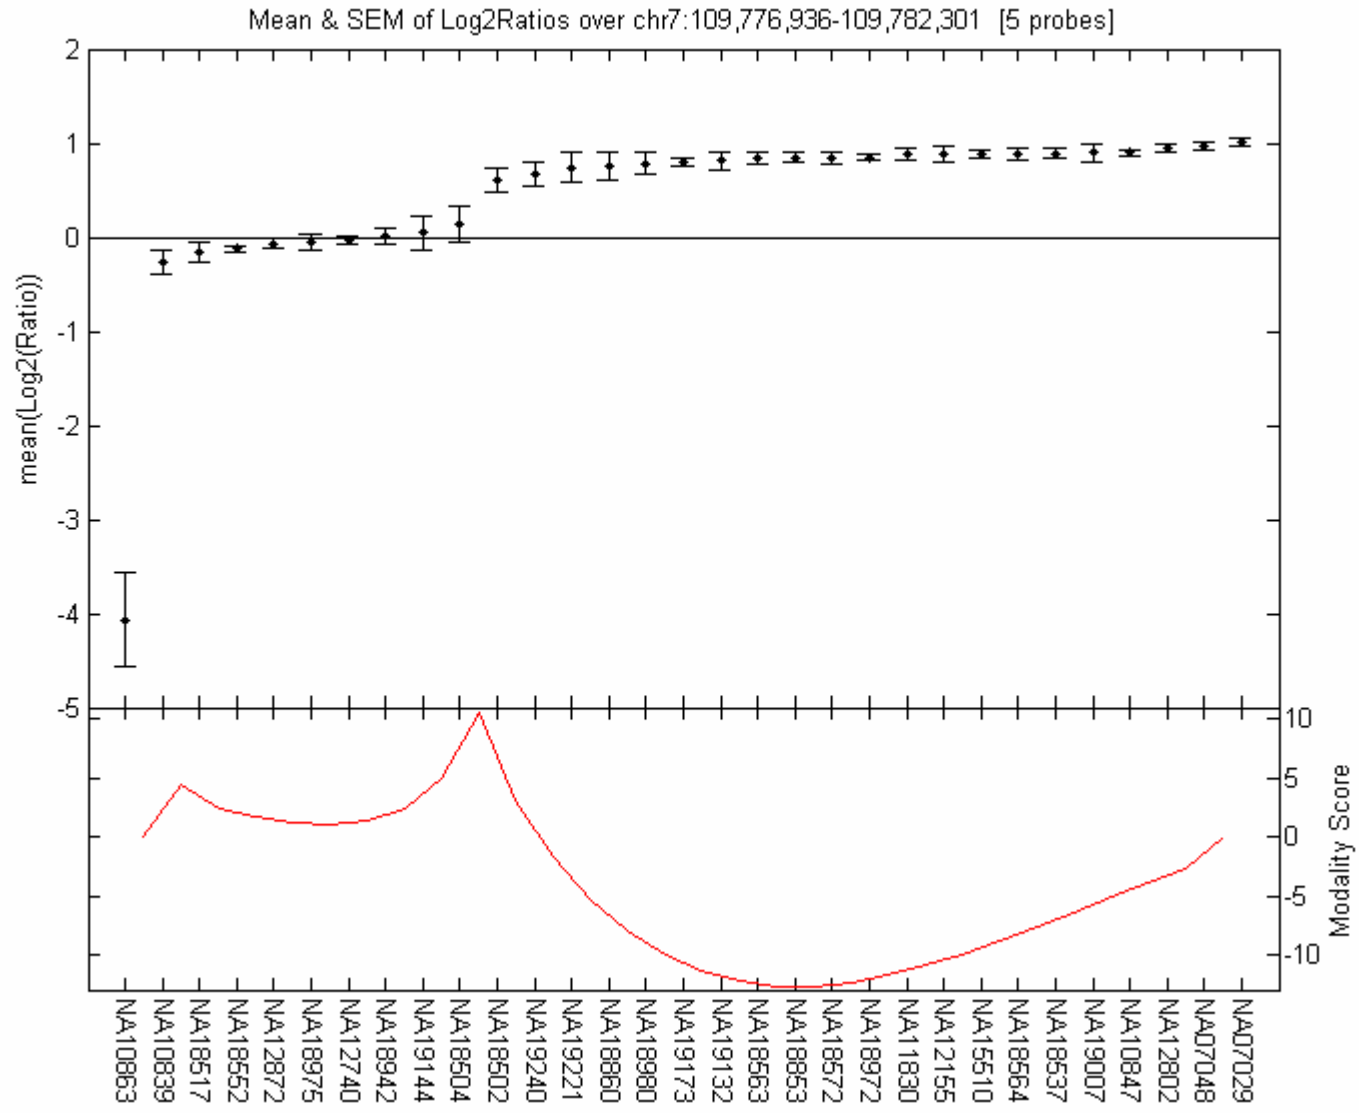

chr7:110,660,715-110,661,142 Score=16.512

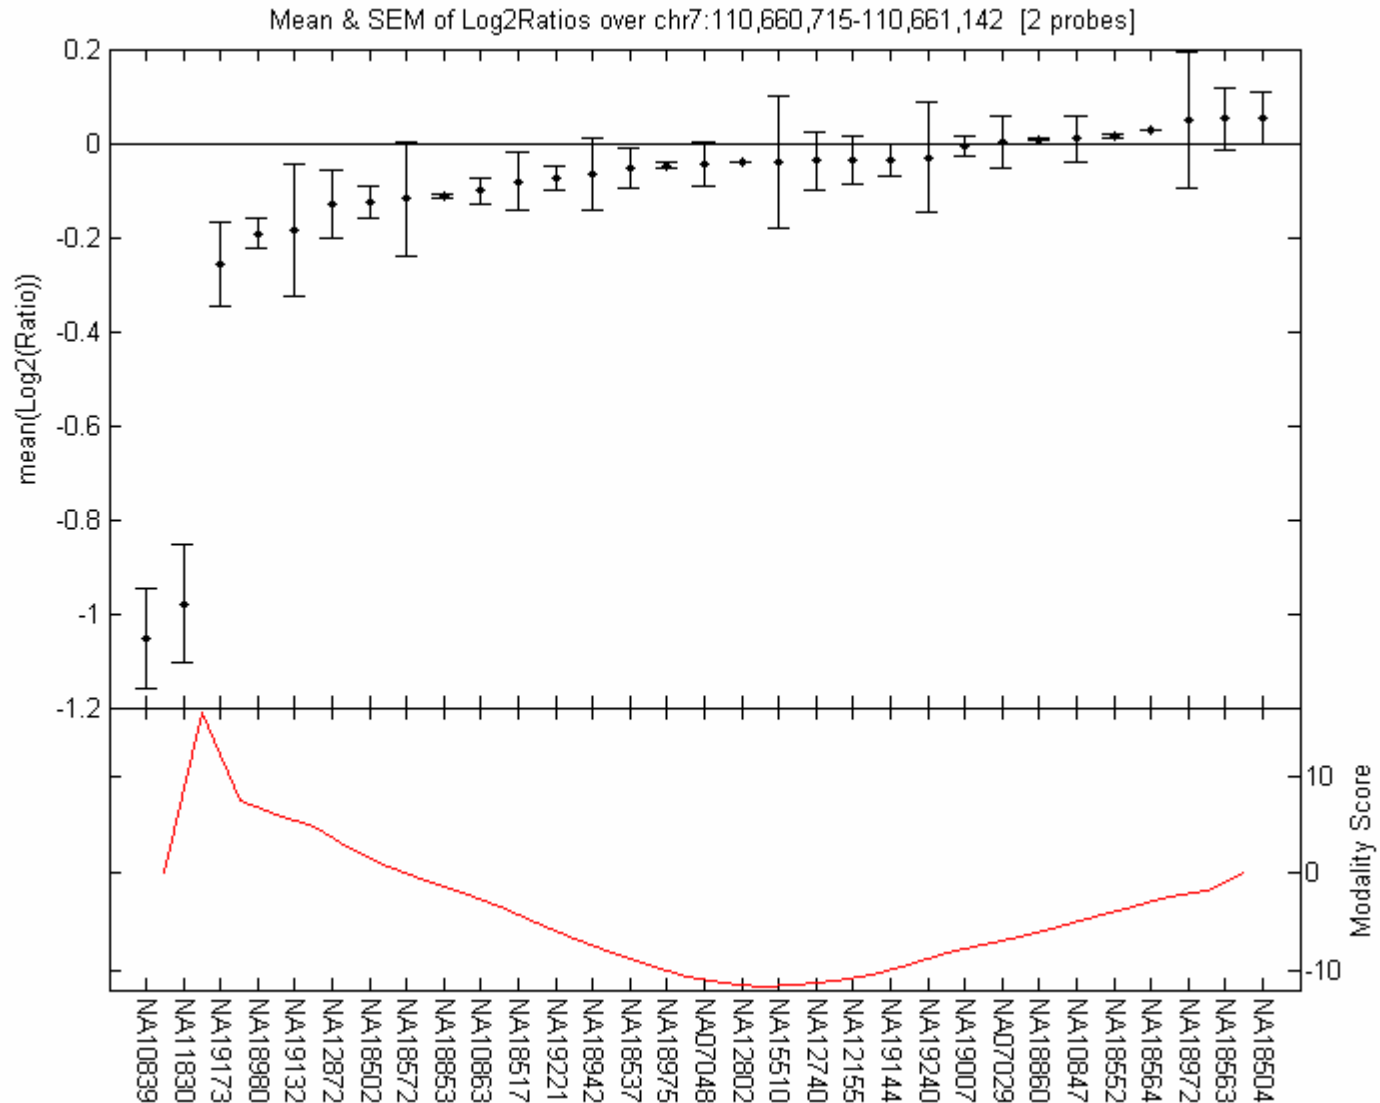

chr7:115,533,784-115,534,405 Score=16.2044

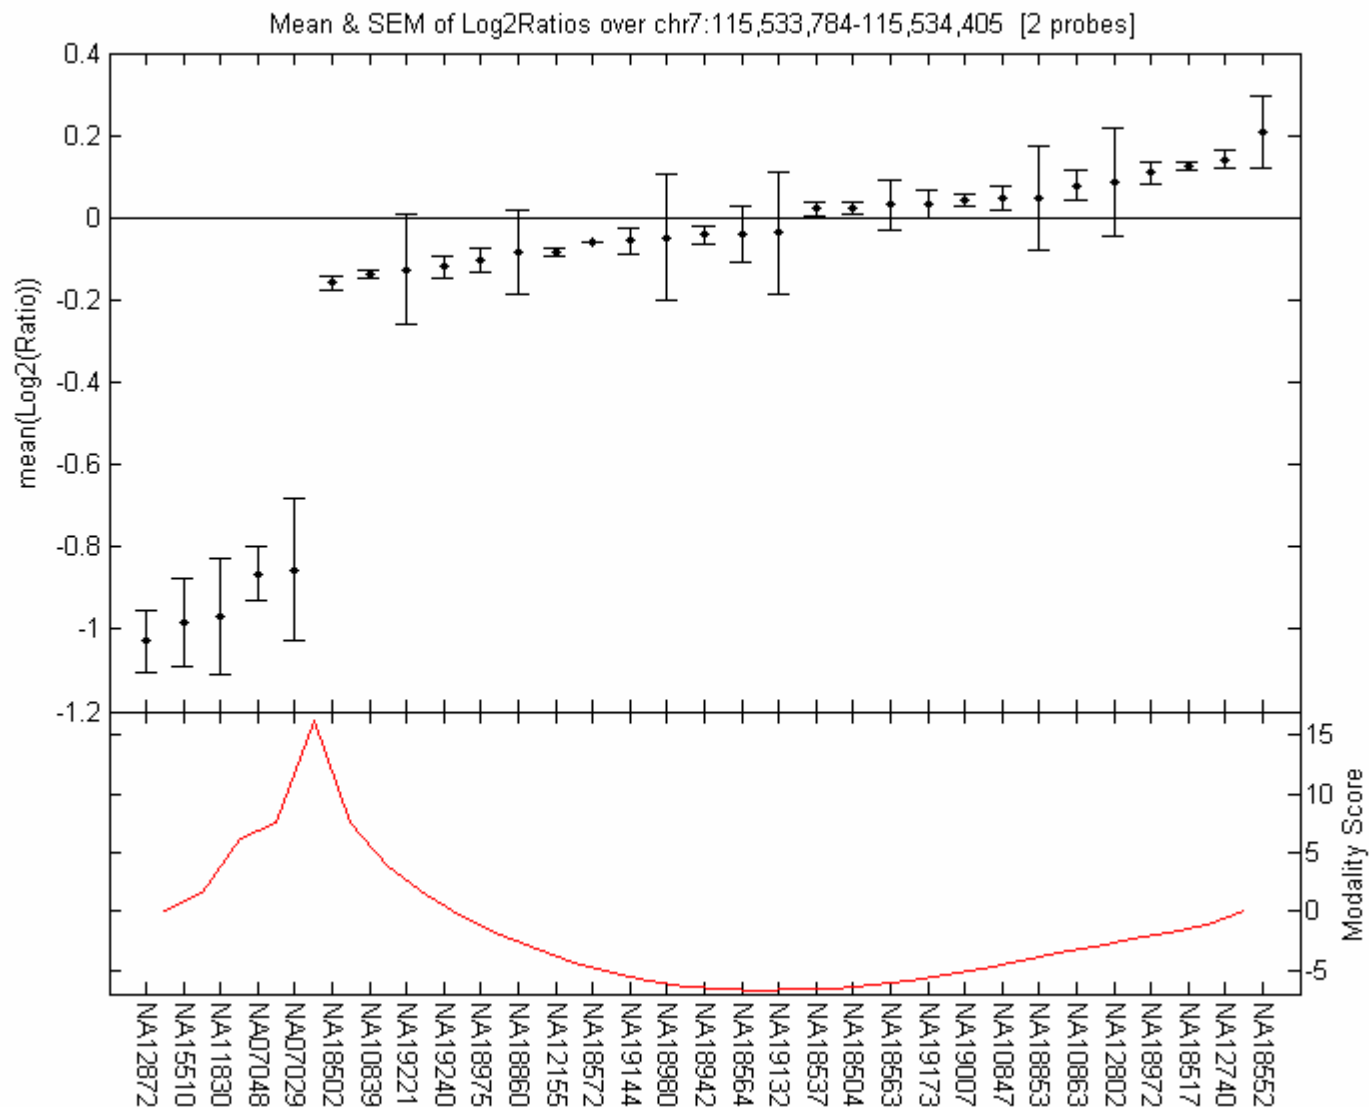

chr7:118,748,237-118,756,302 Score=17.4736

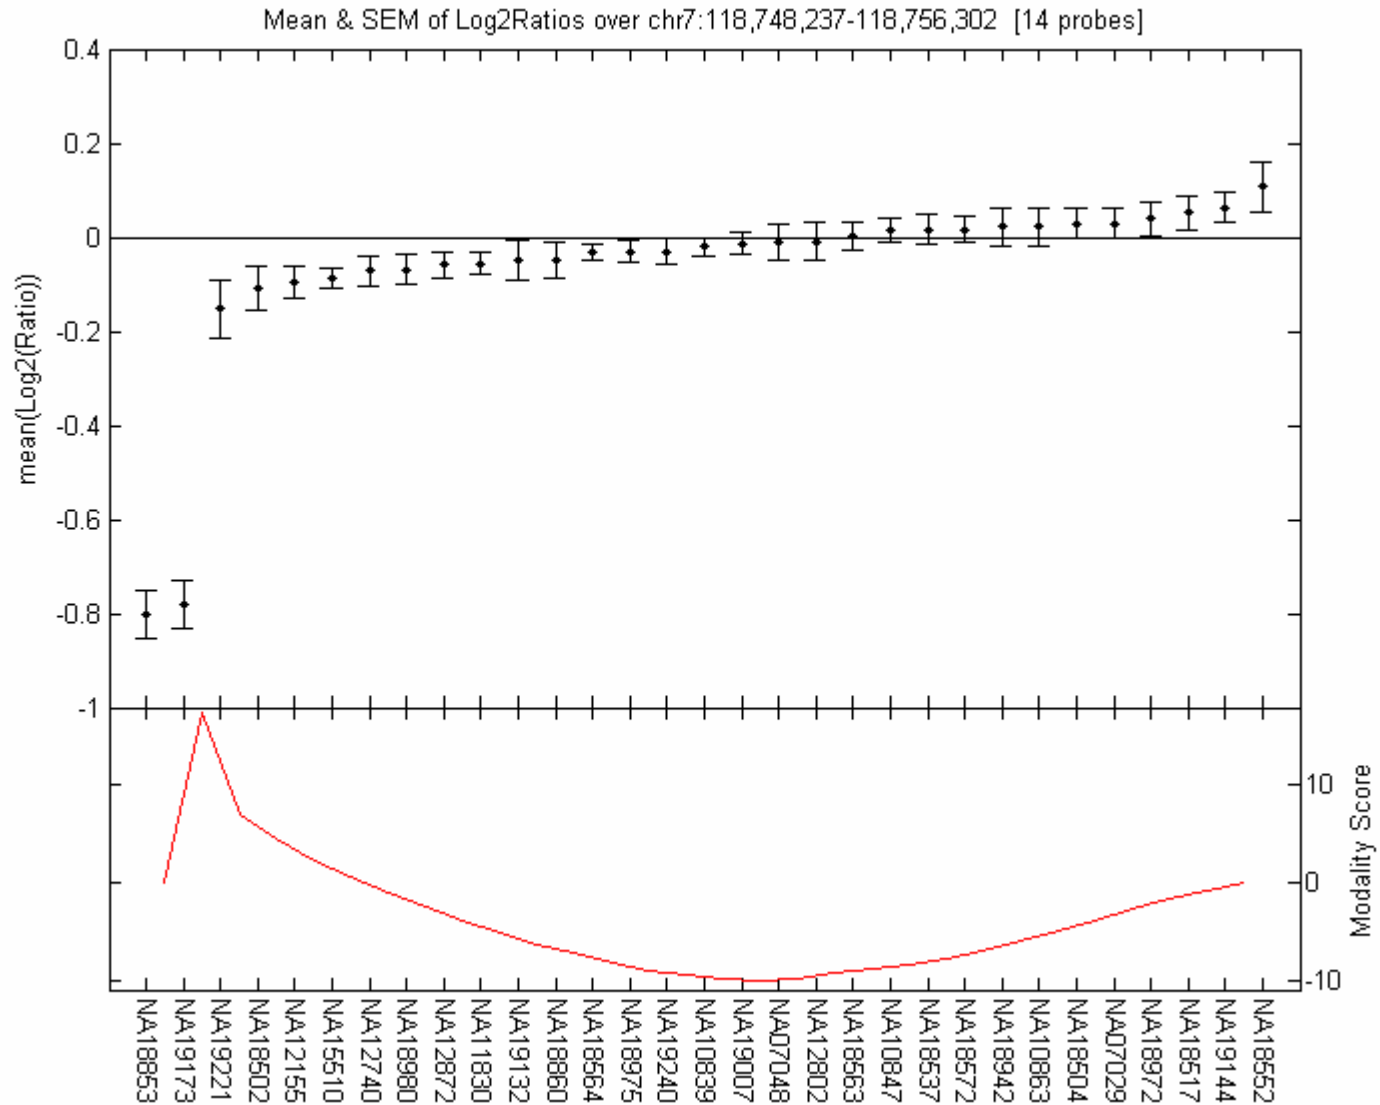

chr7:125,639,961-125,644,046 Score=12.8127

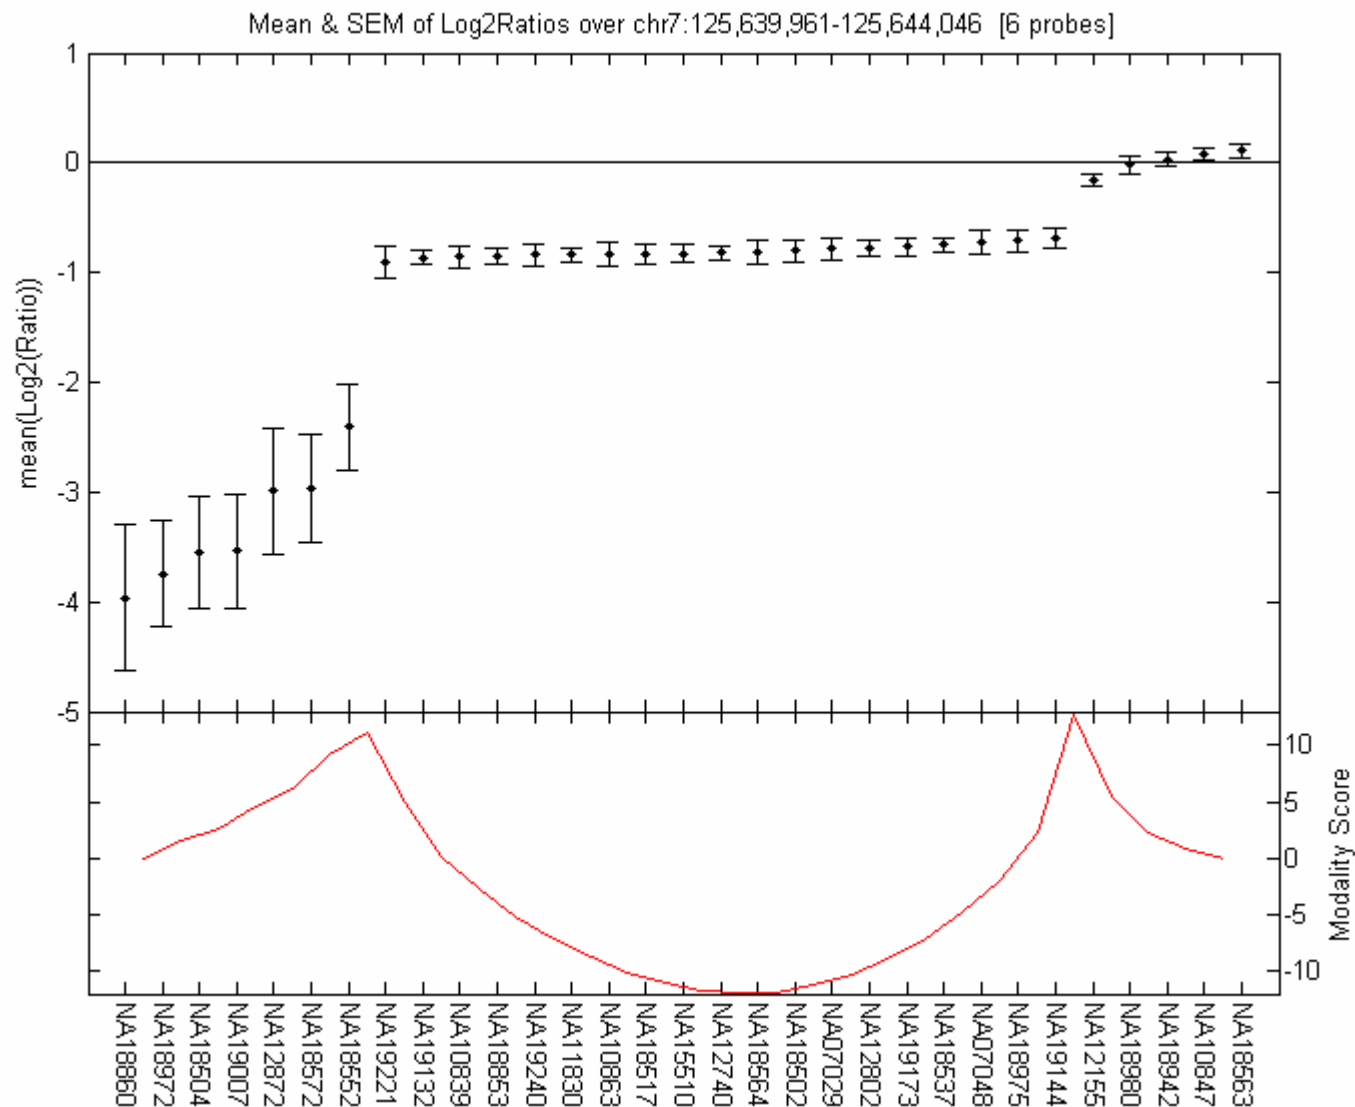

chr7:126,370,302-126,374,771 Score=16.3622

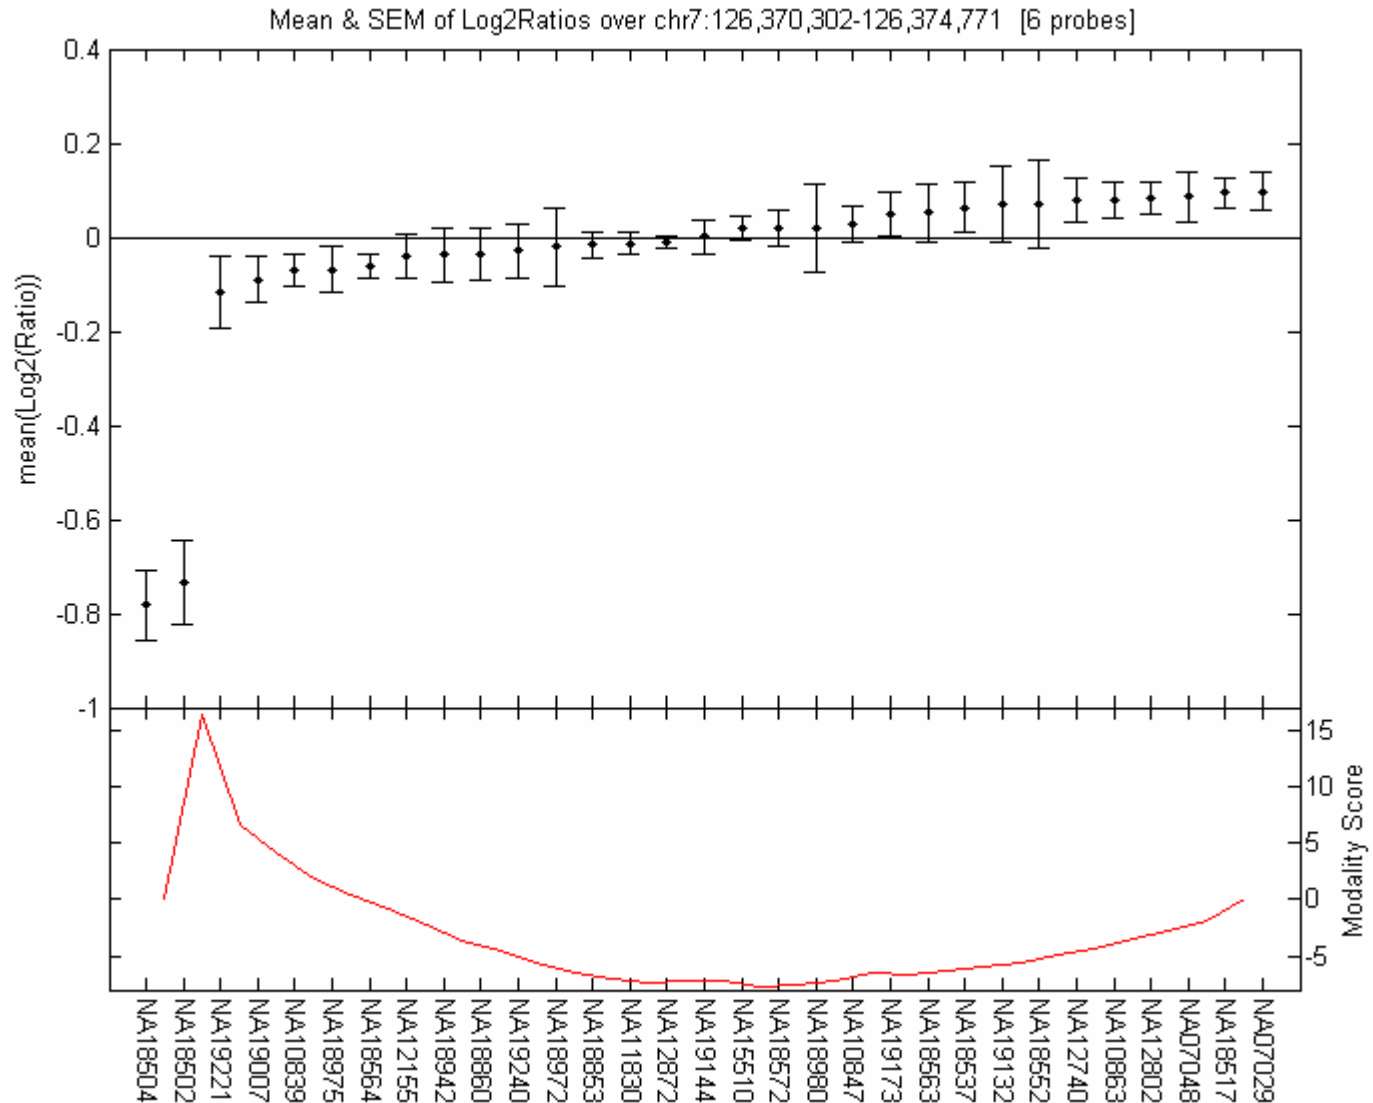

chr7:139,646,674-139,655,248 Score=18.6296

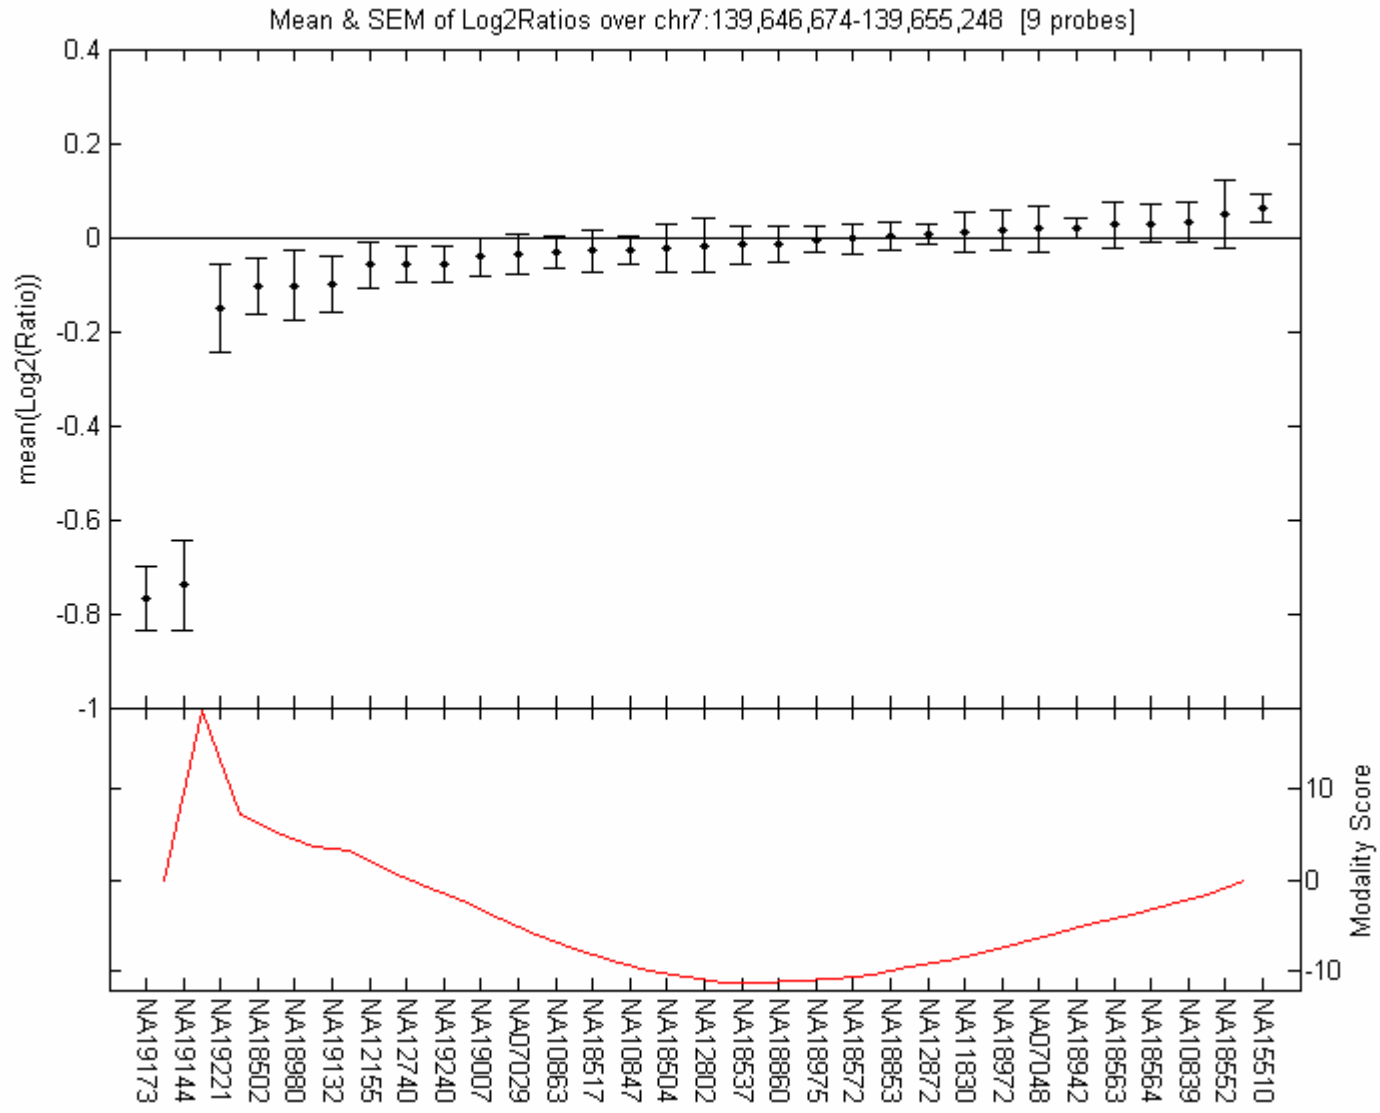



chr8:6,814,375-6,815,199 Score=12.8919

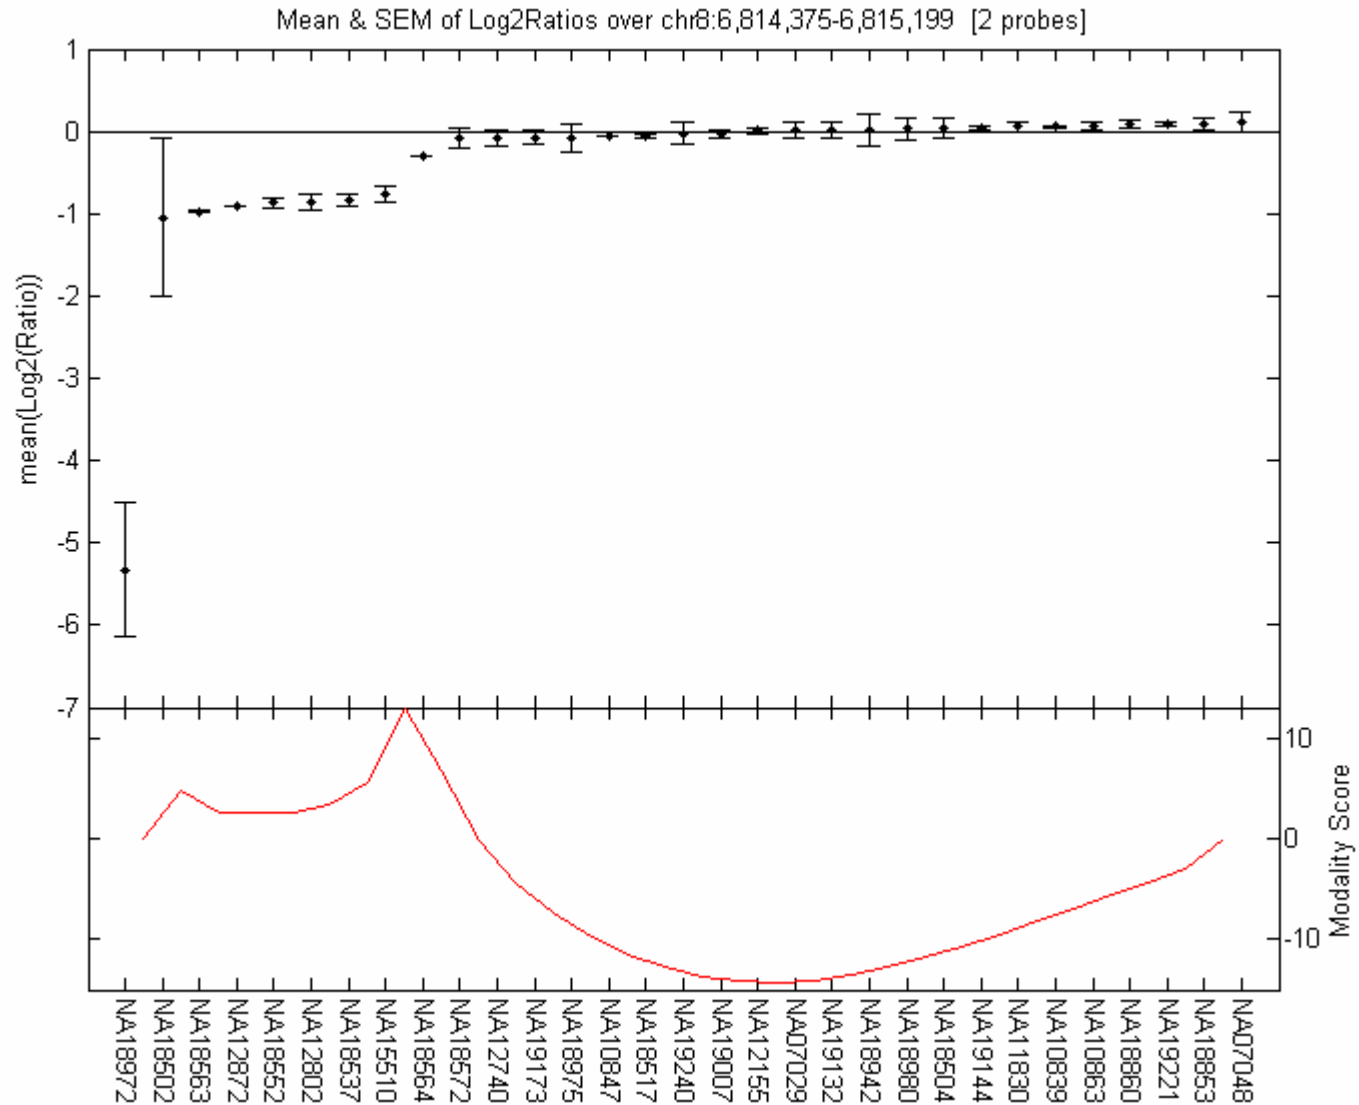

chr8:13,660,096-13,694,817 Score=17.9965

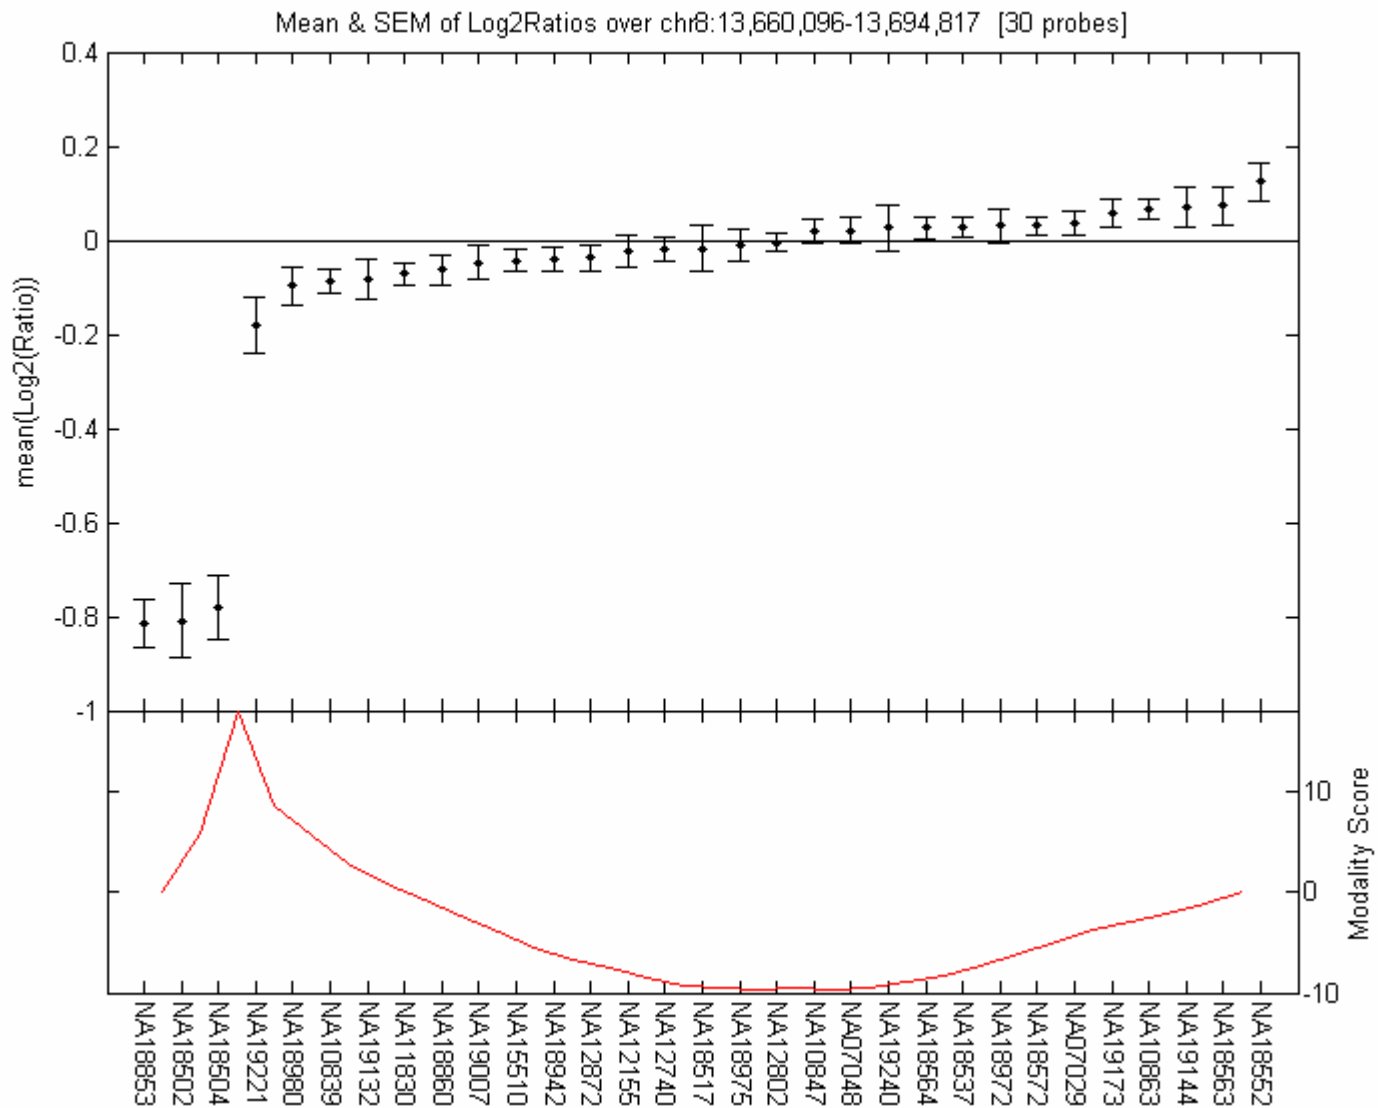

chr8:25,028,930-25,046,777 Score=22.0666

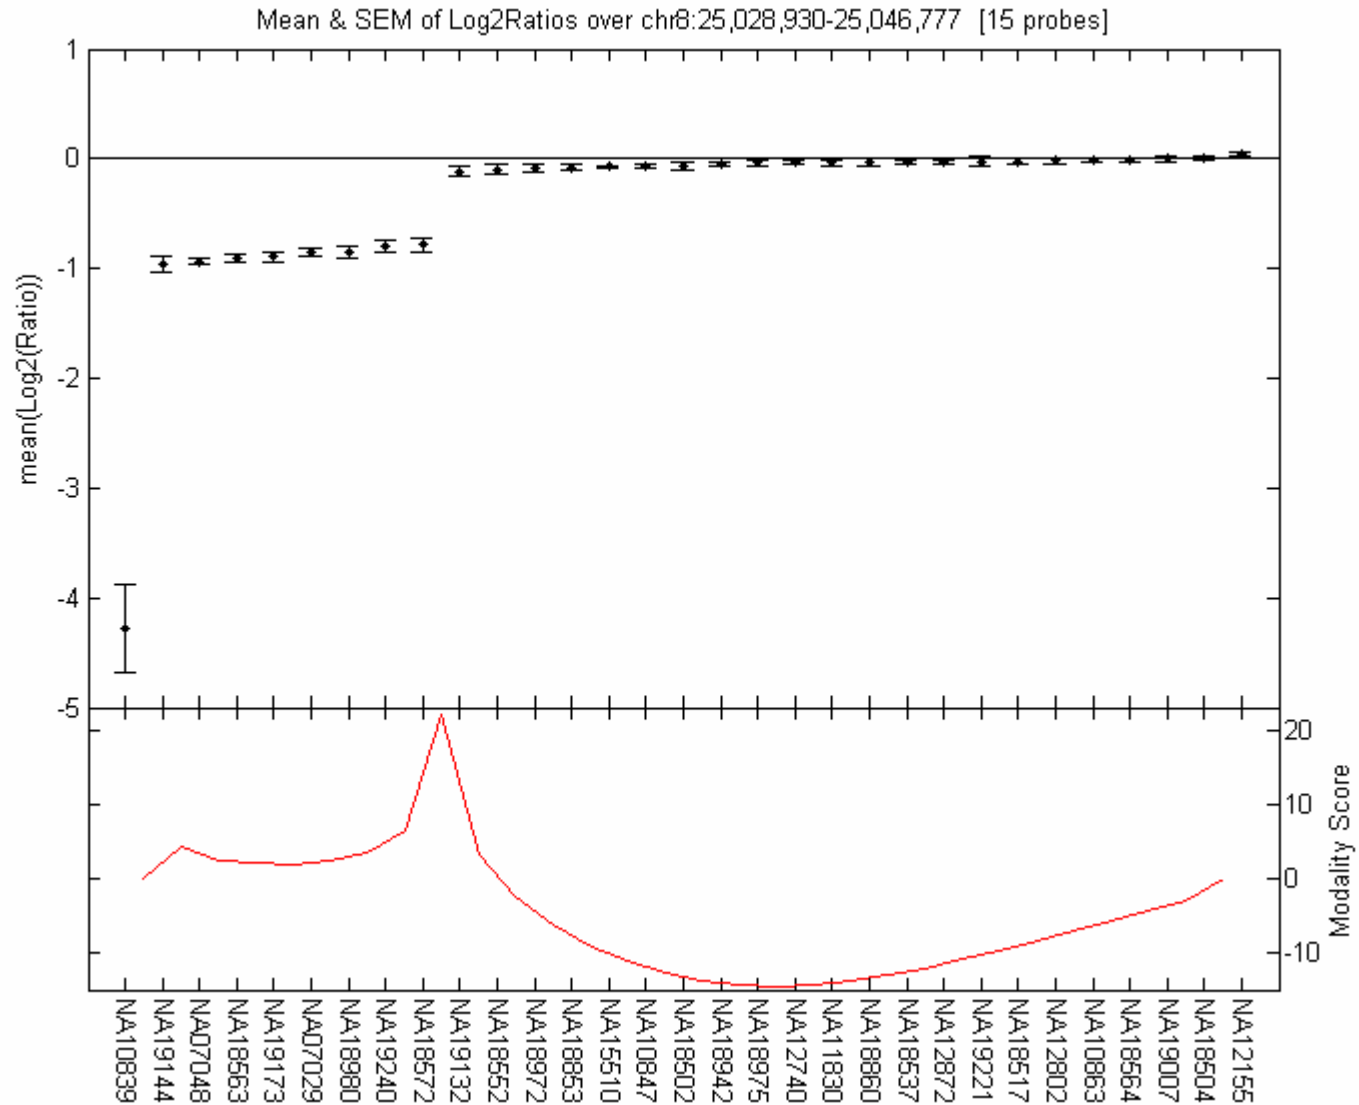

chr8:25,467,638-25,470,702 Score=11.8805

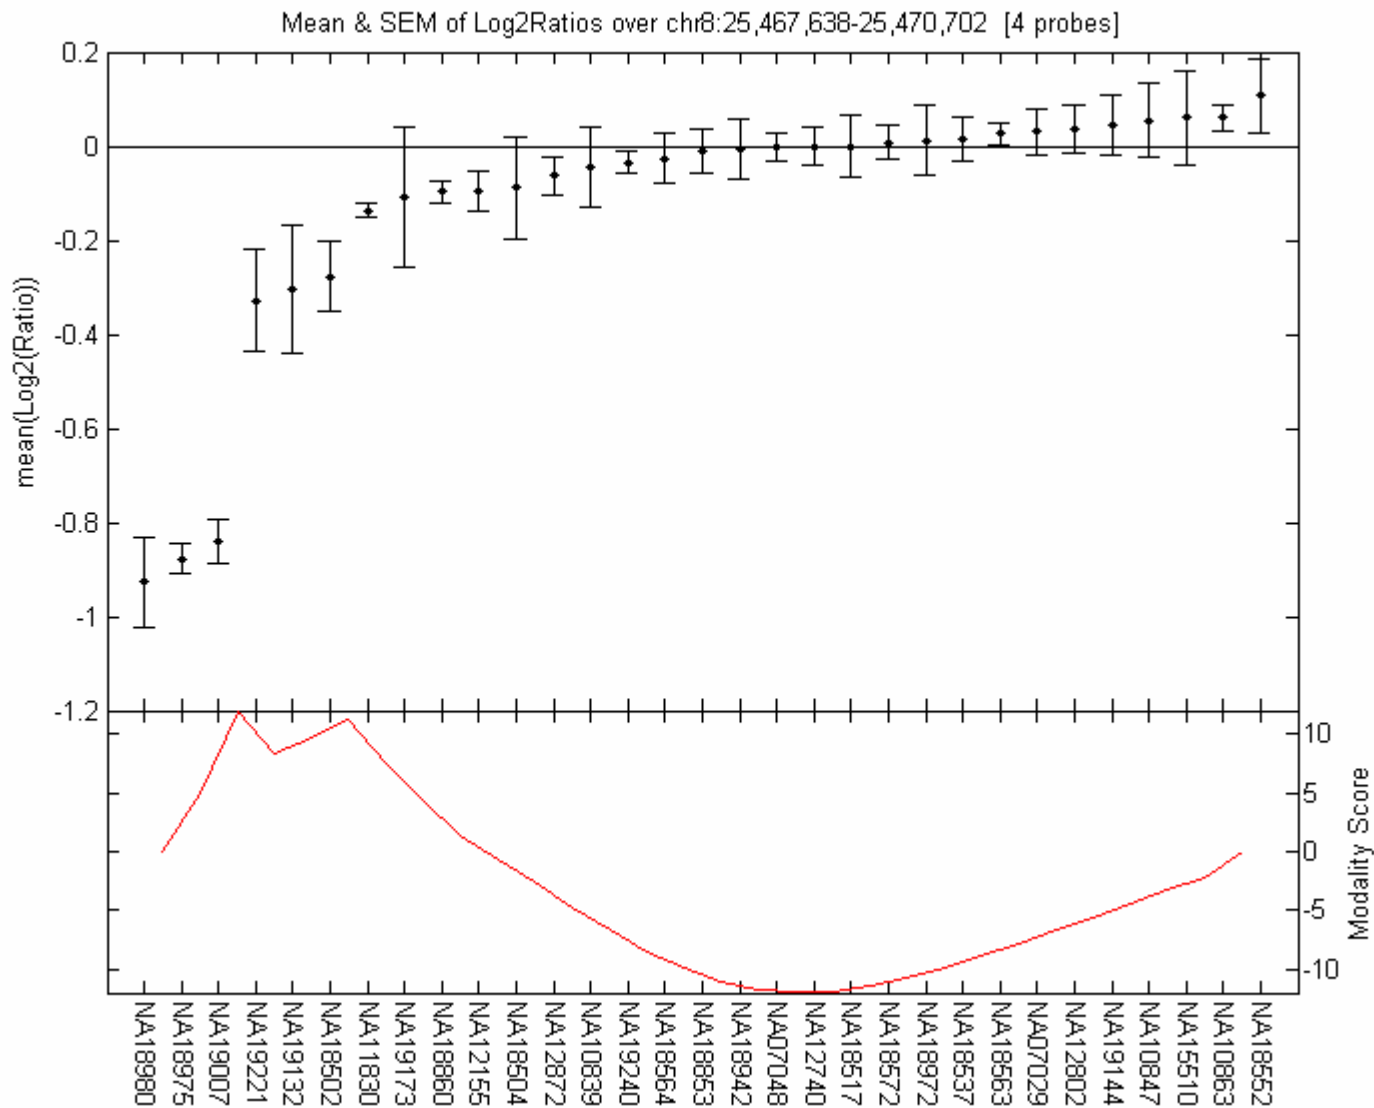

chr8:32,799,859-32,810,654 Score=22.6783

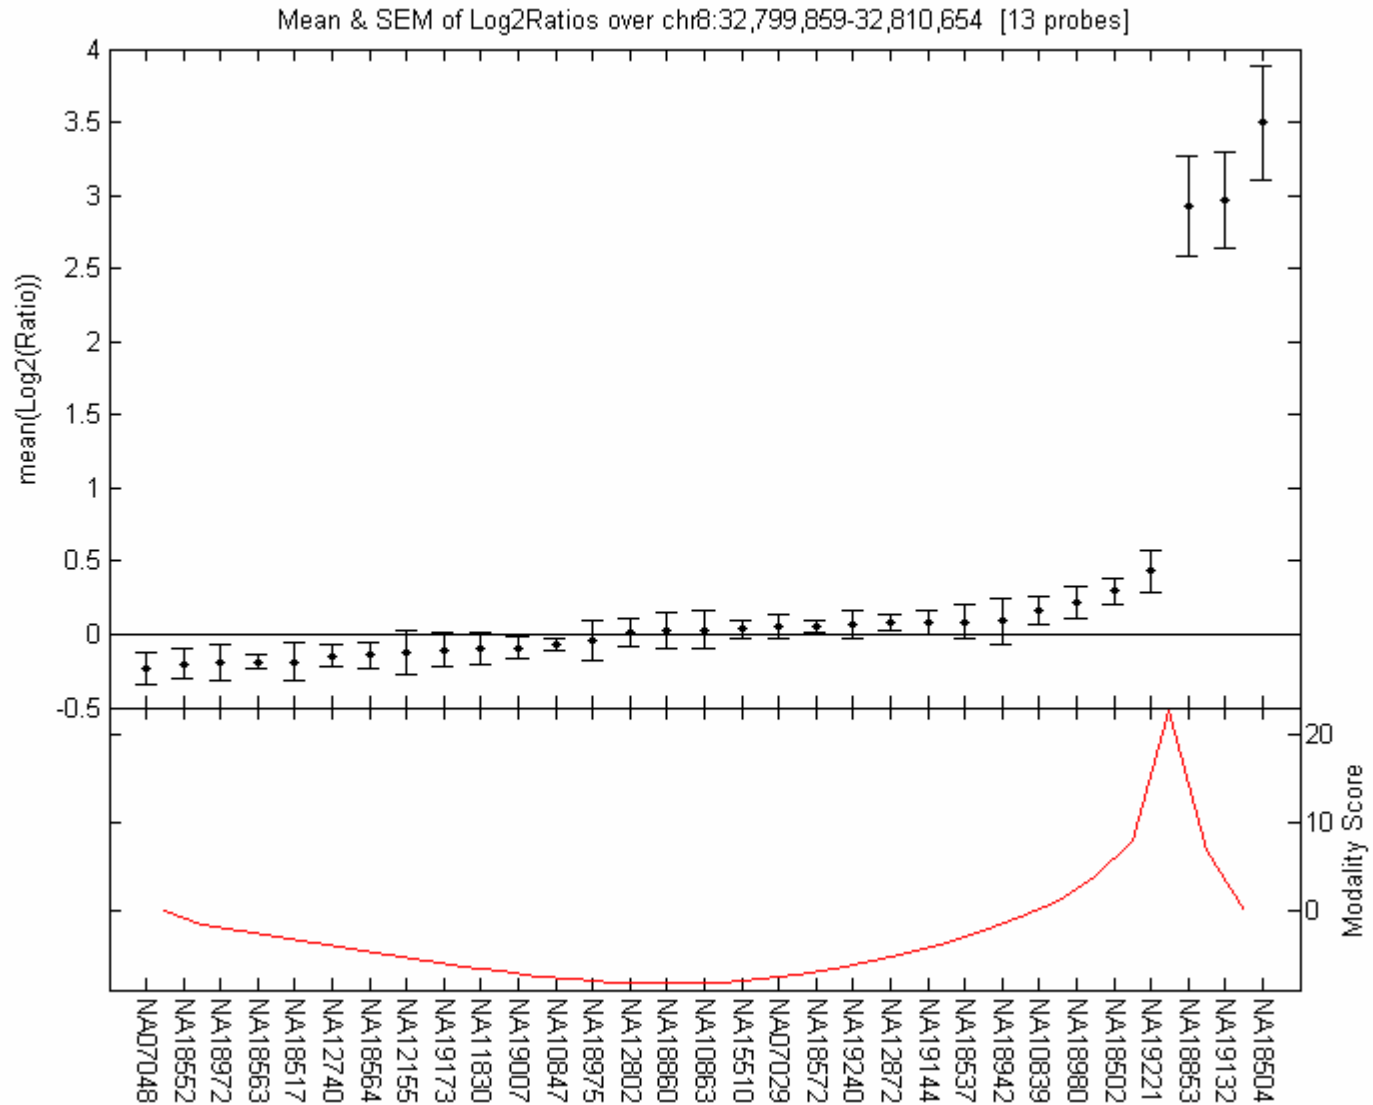

chr8:40,302,061-40,308,873 Score=13.9347

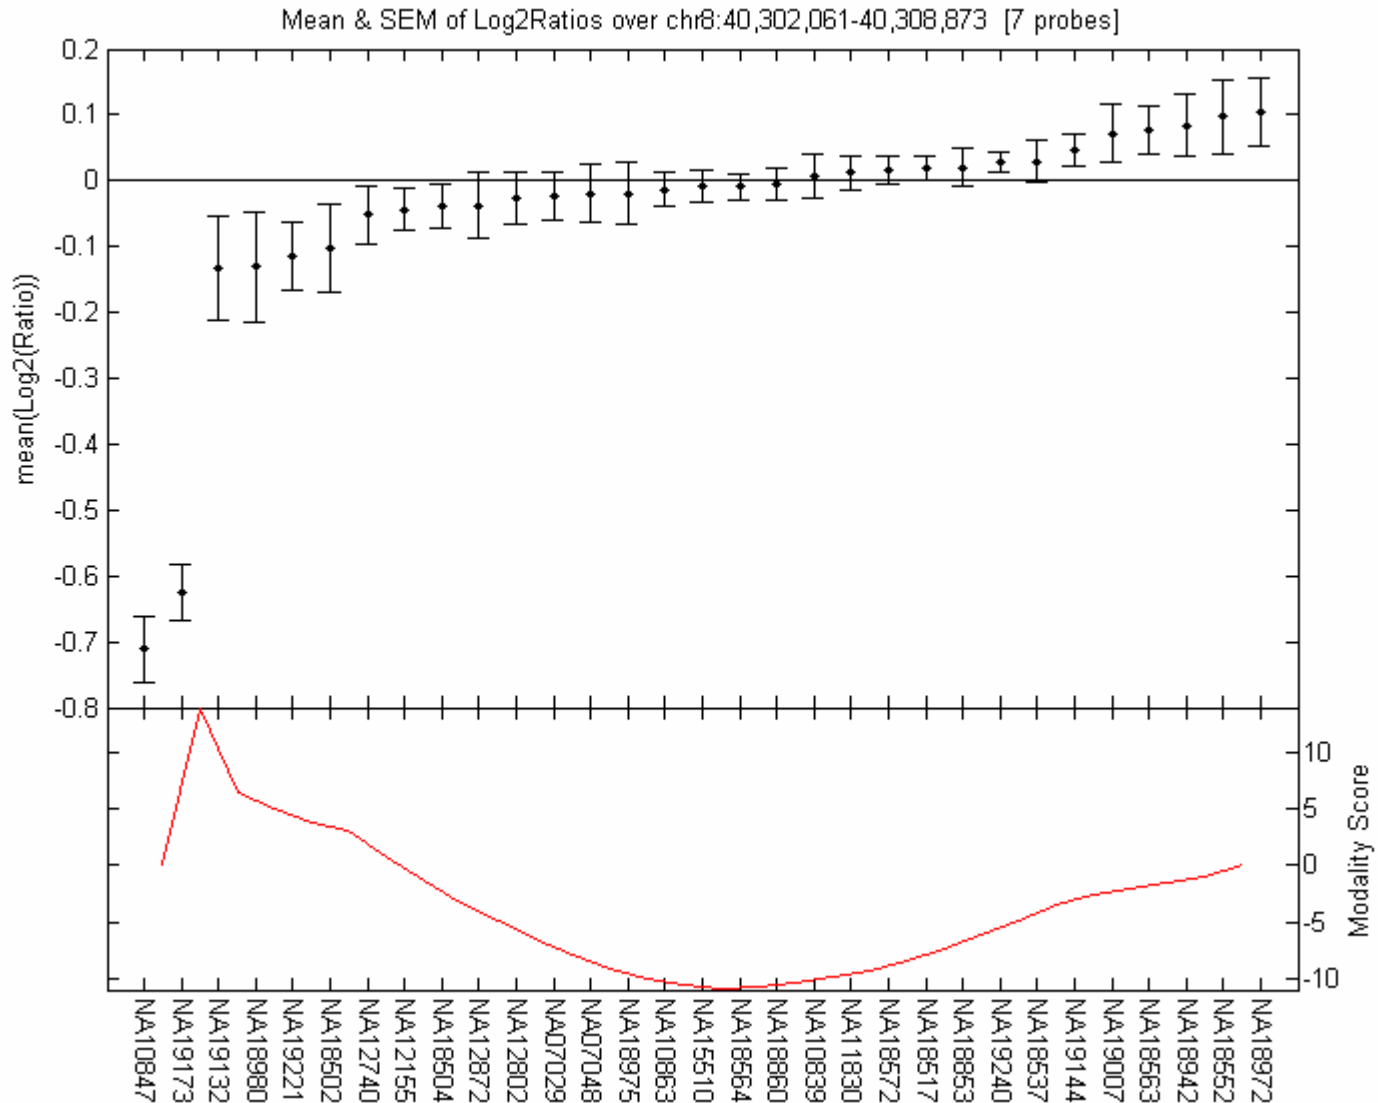

chr8:47,645,038-47,658,734 Score=17.658

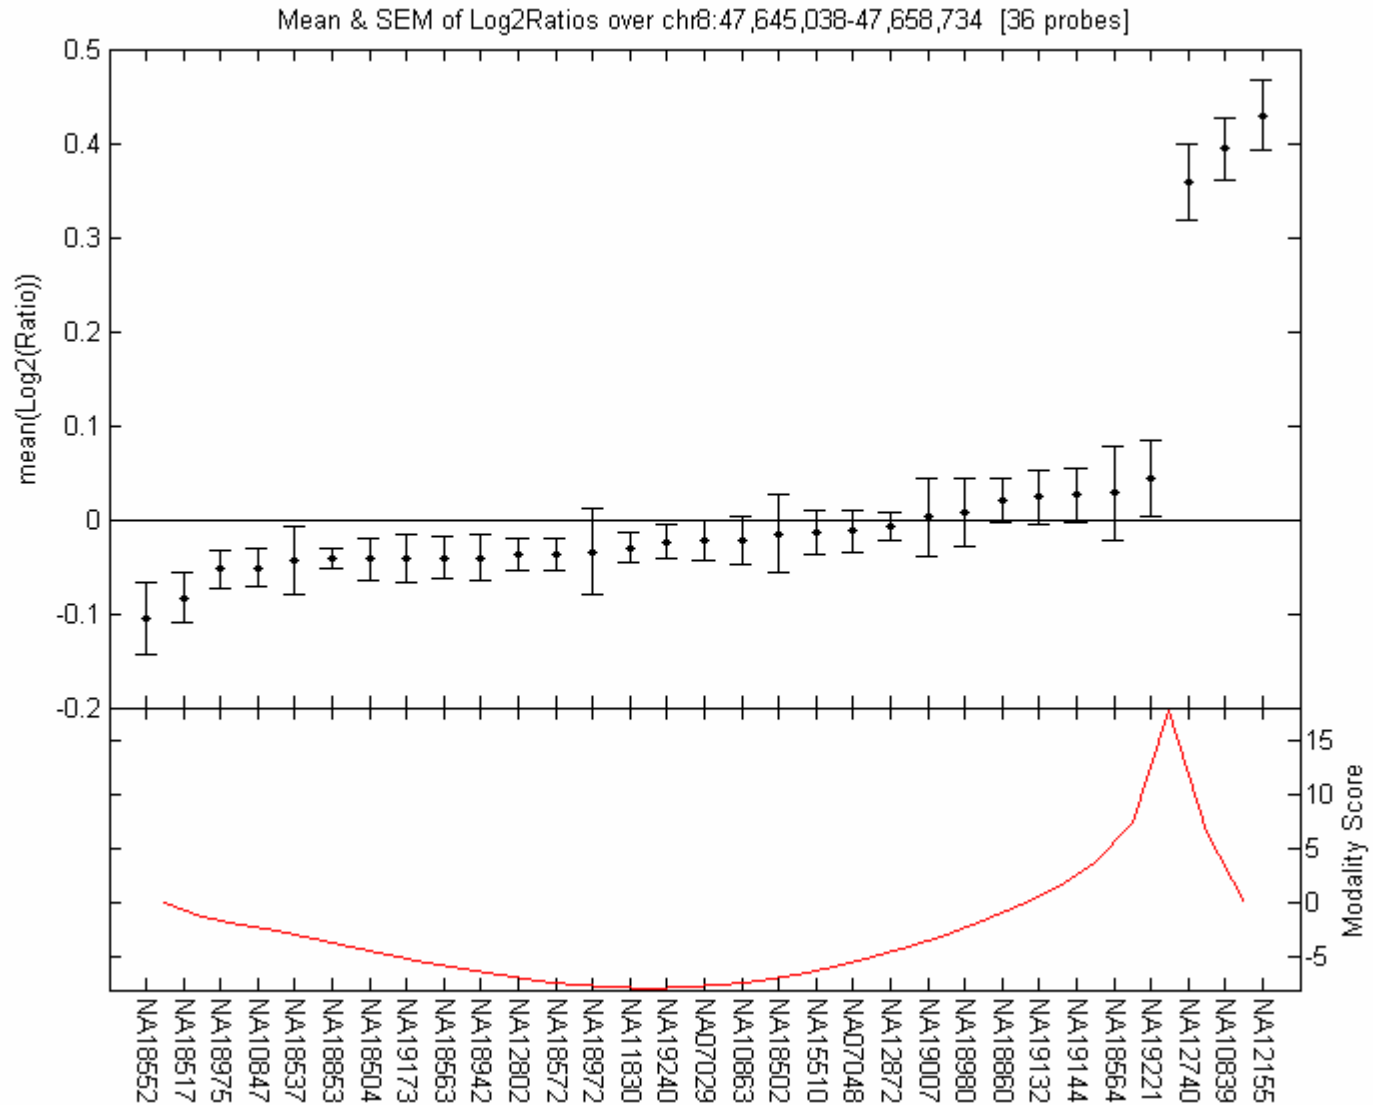

chr8:51,194,005-51,200,867 Score=18.2532

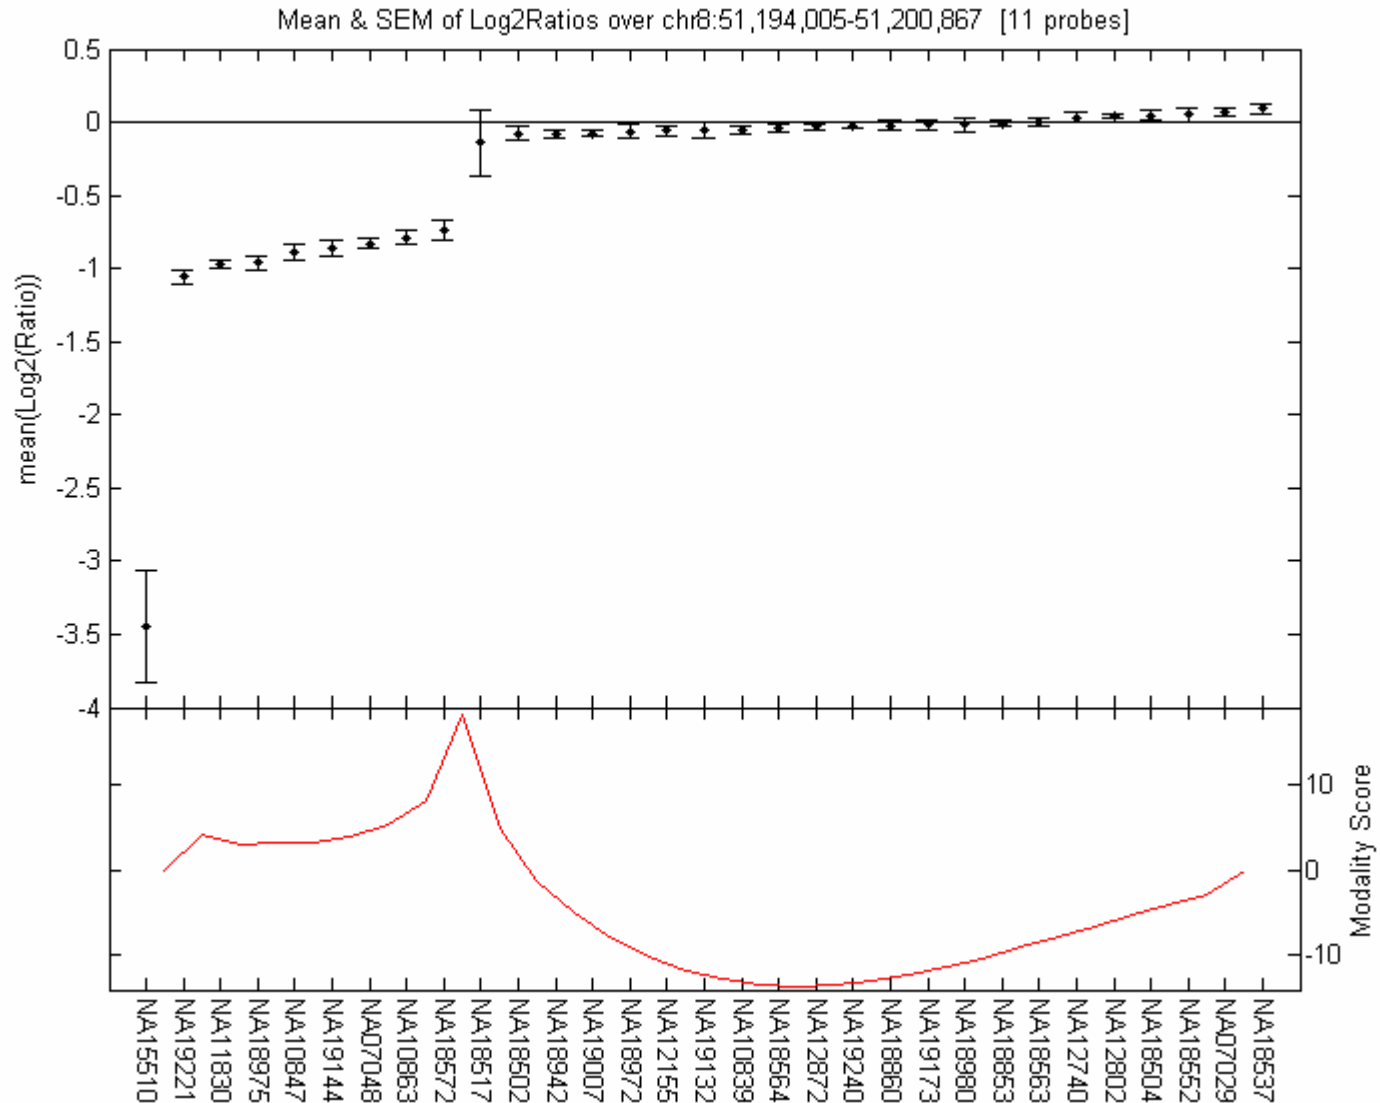



chr8:72,377,848-72,379,847 Score=15.4005

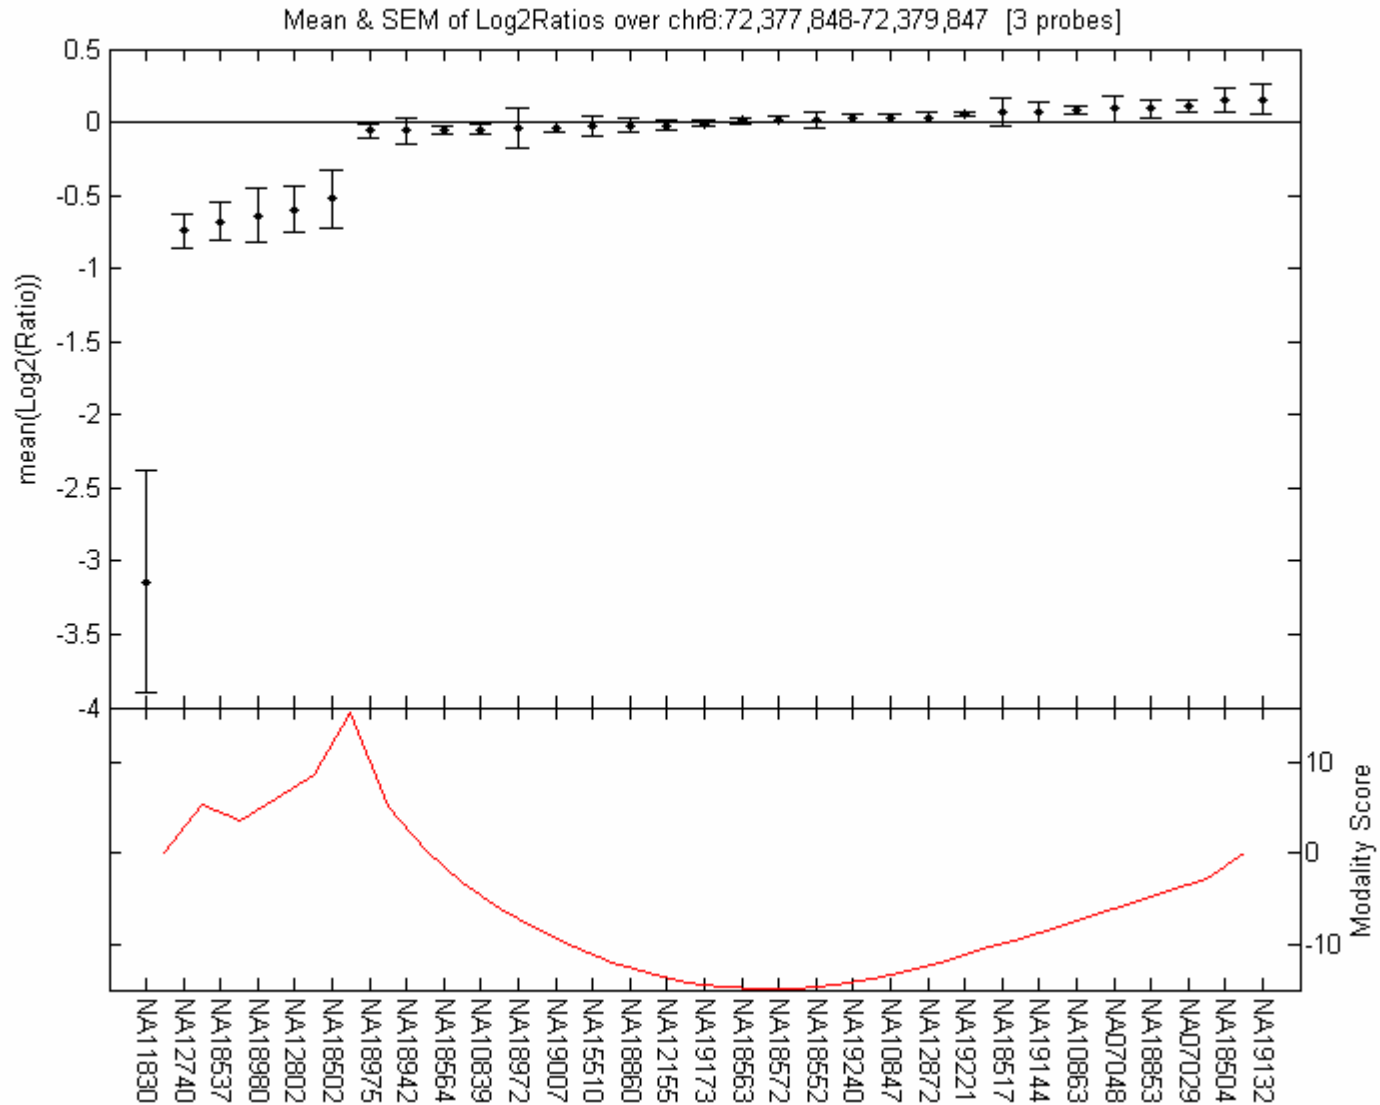

chr8:85,424,256-85,431,347 Score=22.8426

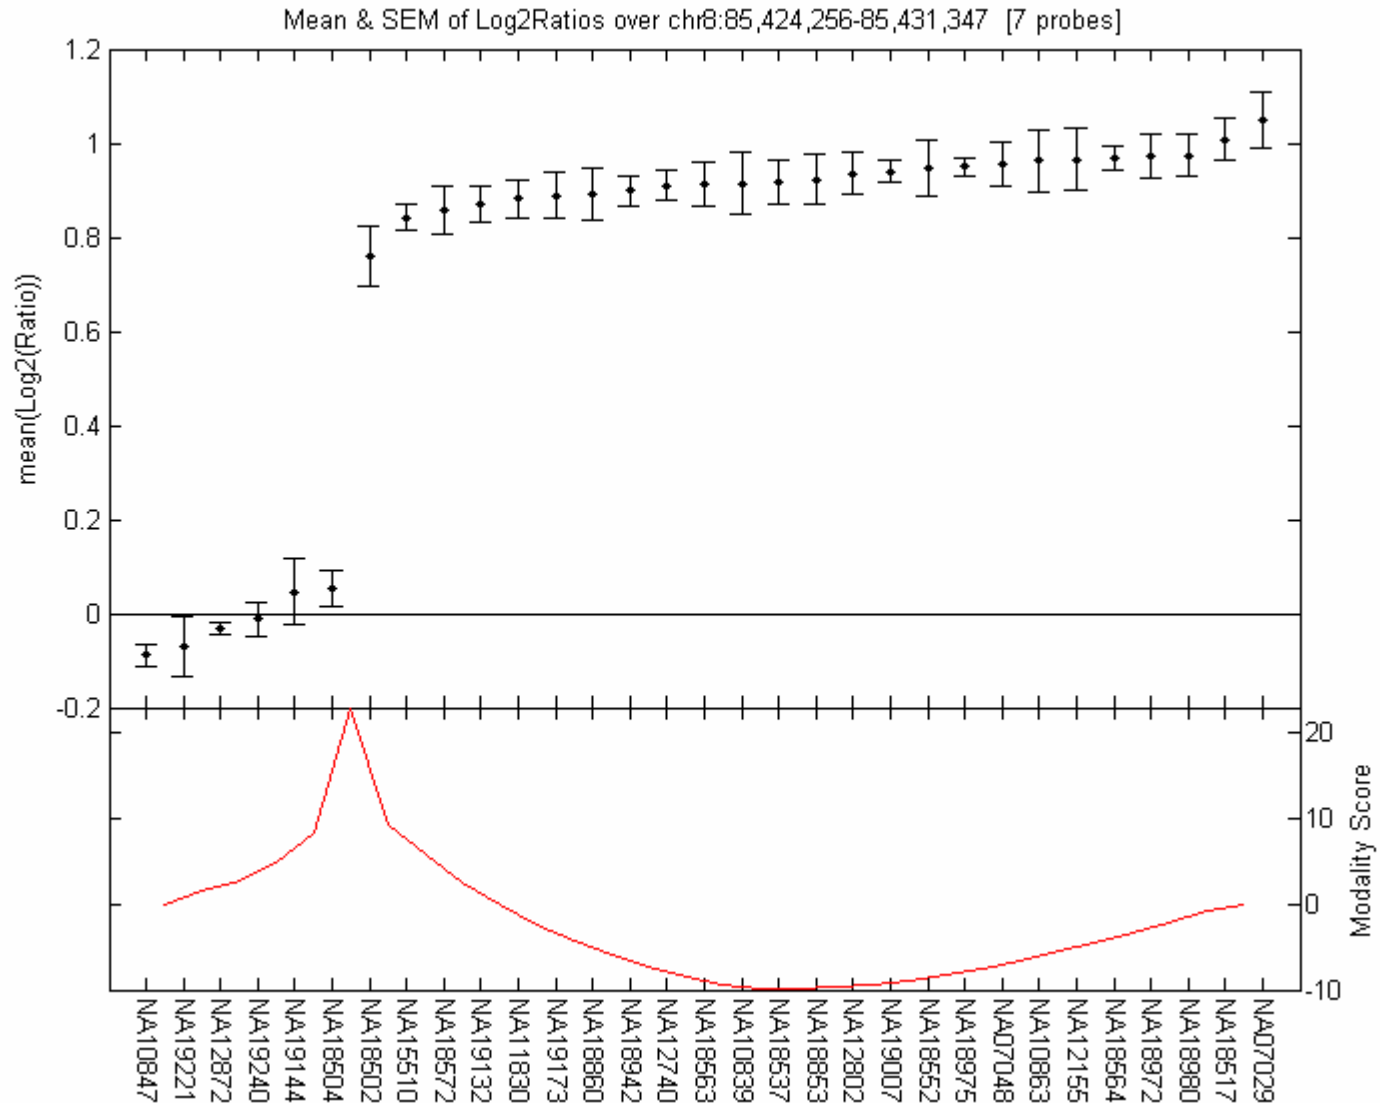

chr8:102,690,530-102,694,979 Score=21.2388

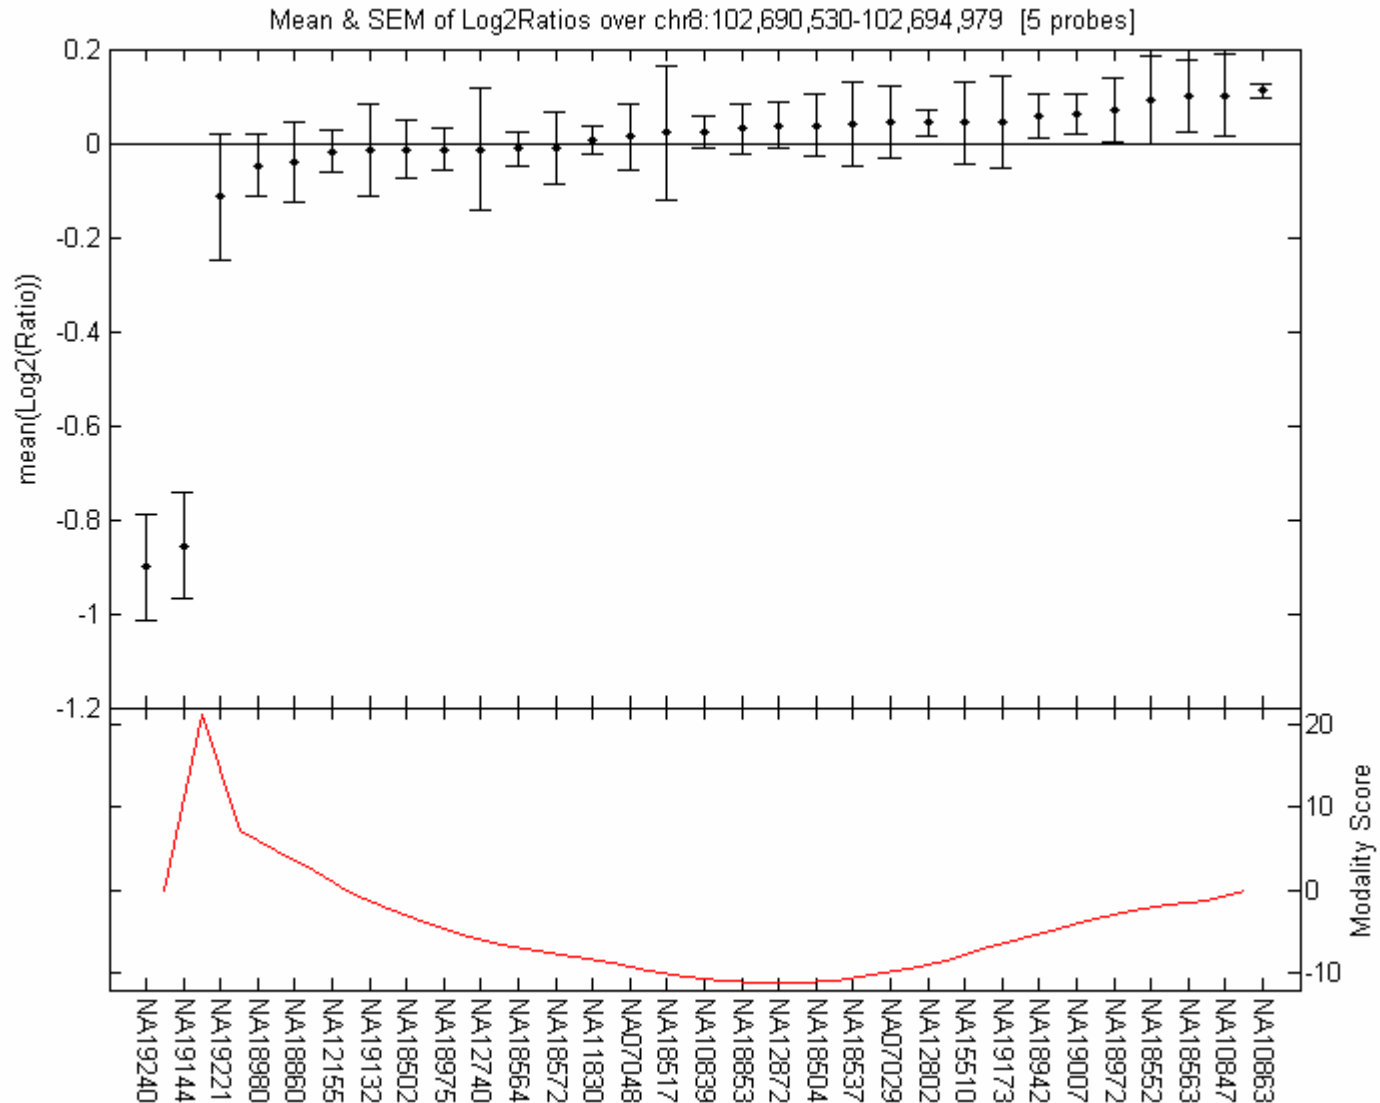

chr8:115,148,517-115,149,348 Score=11.0486

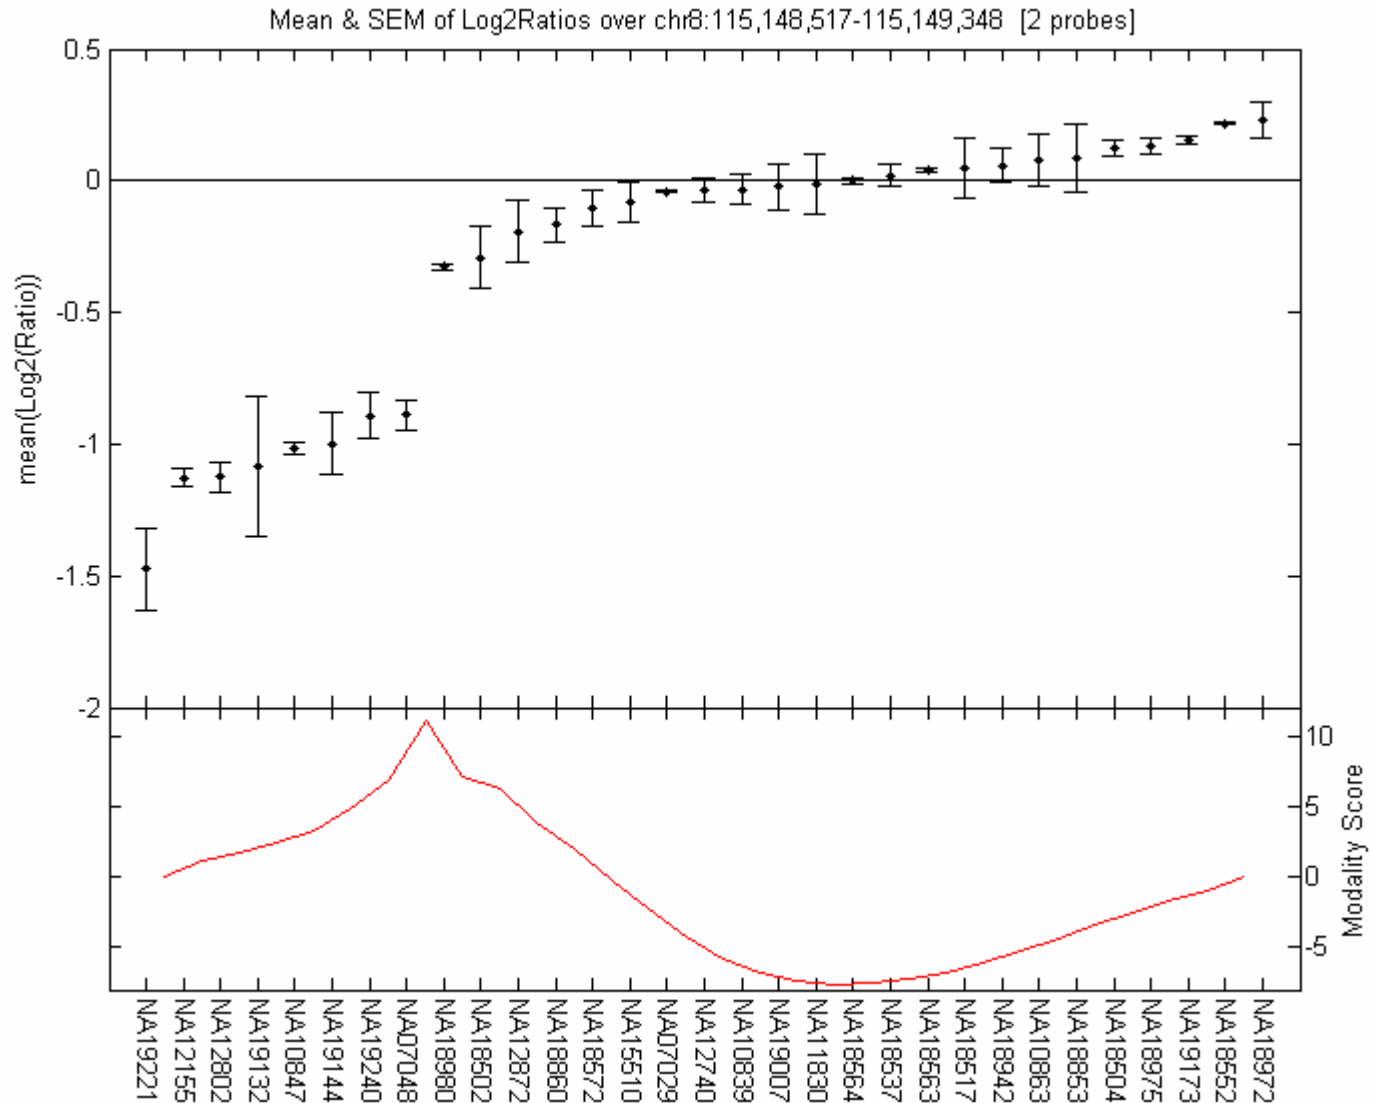

chr8:115,703,065-115,712,563 Score=21.8491

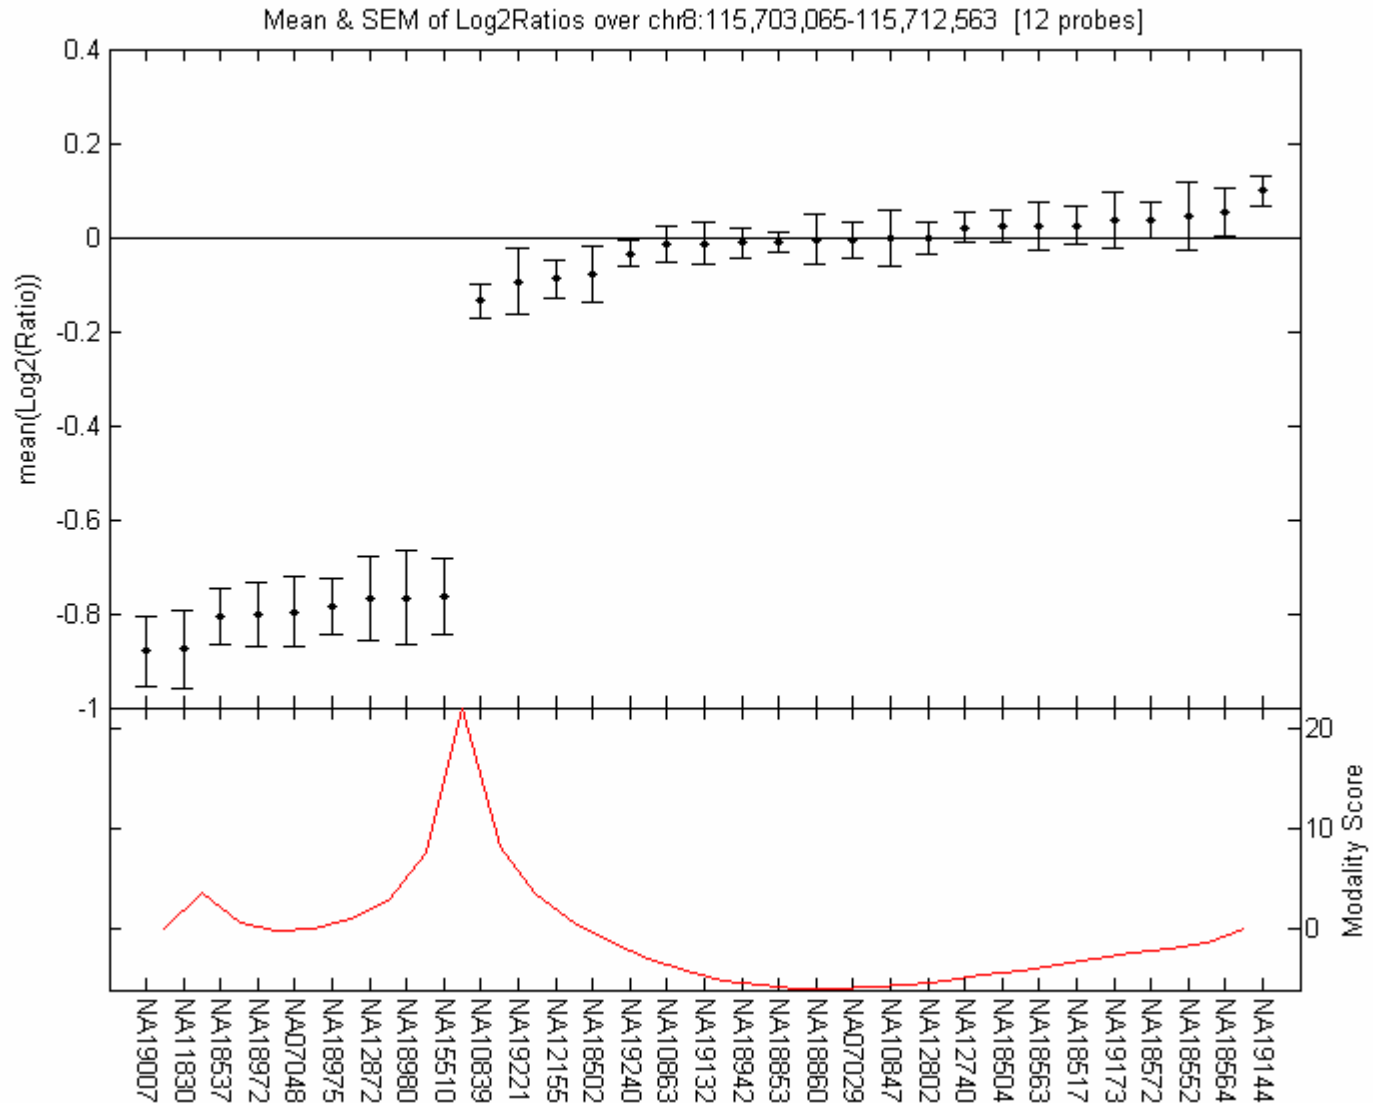

chr8:120,089,950-120,091,092 Score=17.6526

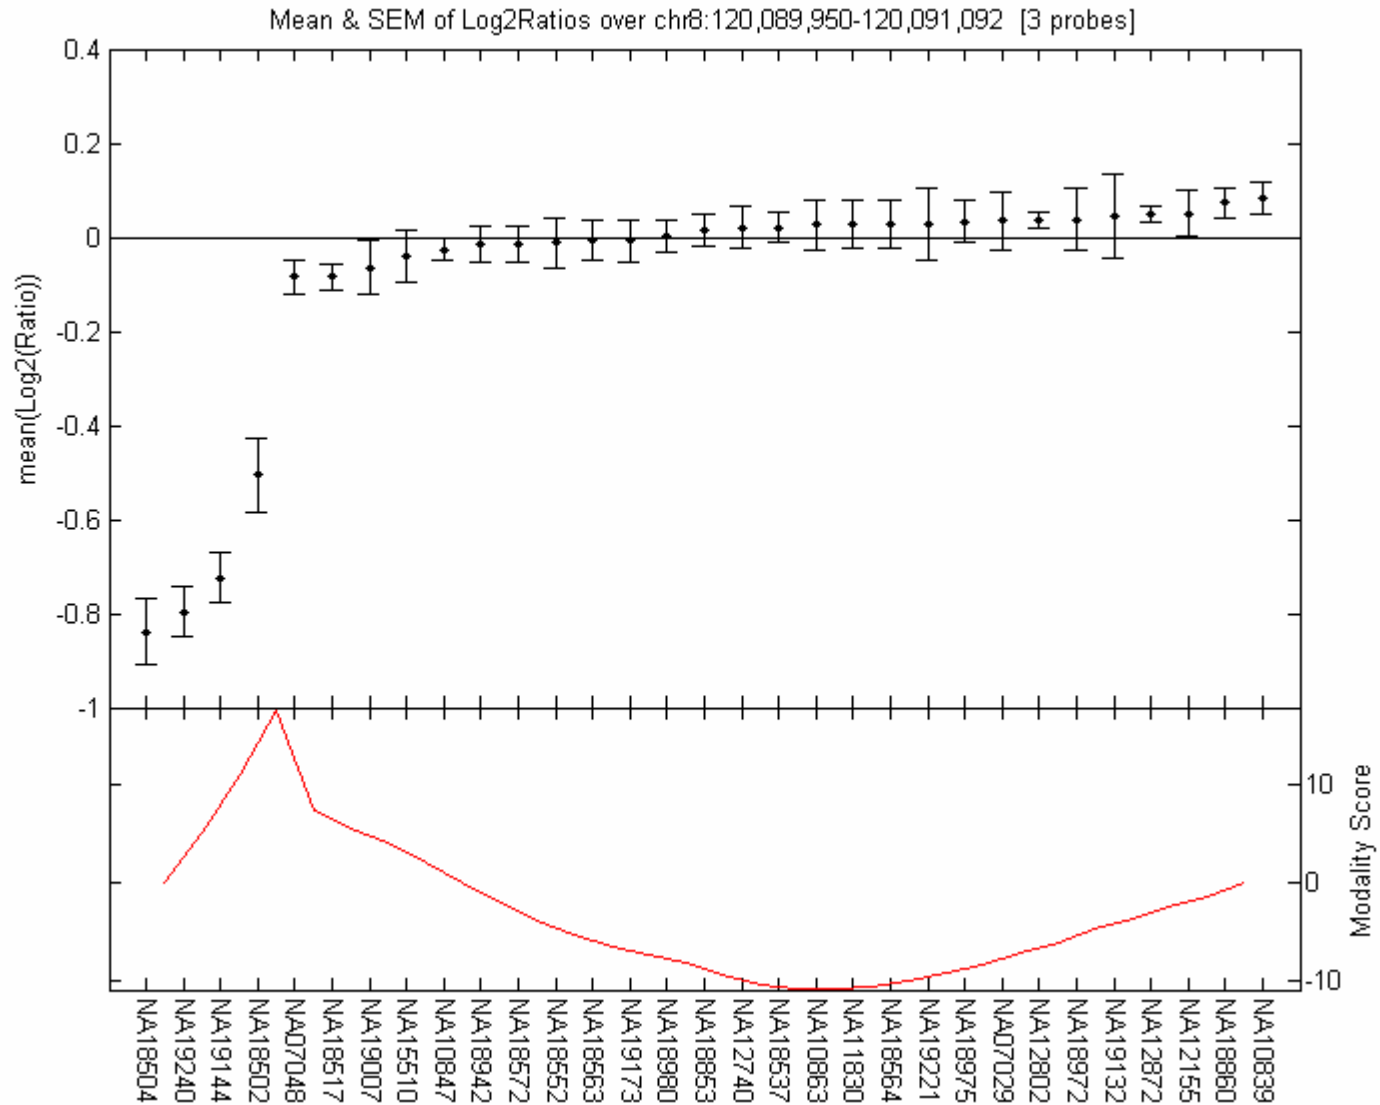

chr8:123,129,127-123,130,019 Score=13.8451

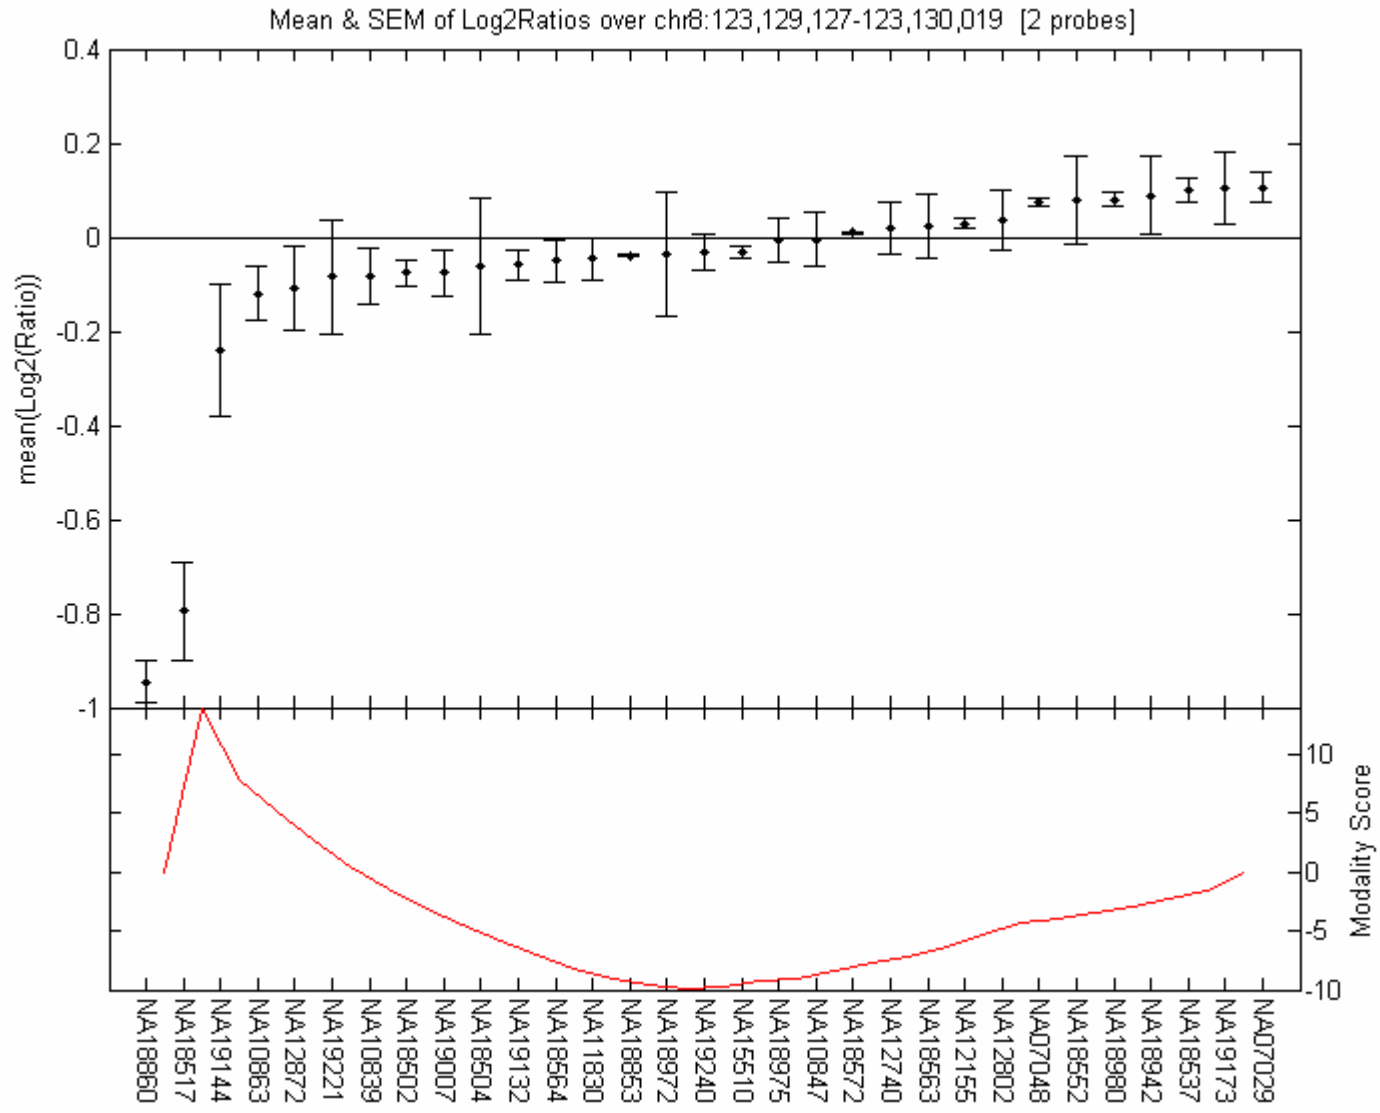

chr8:137,765,474-137,774,517 Score=18.0583

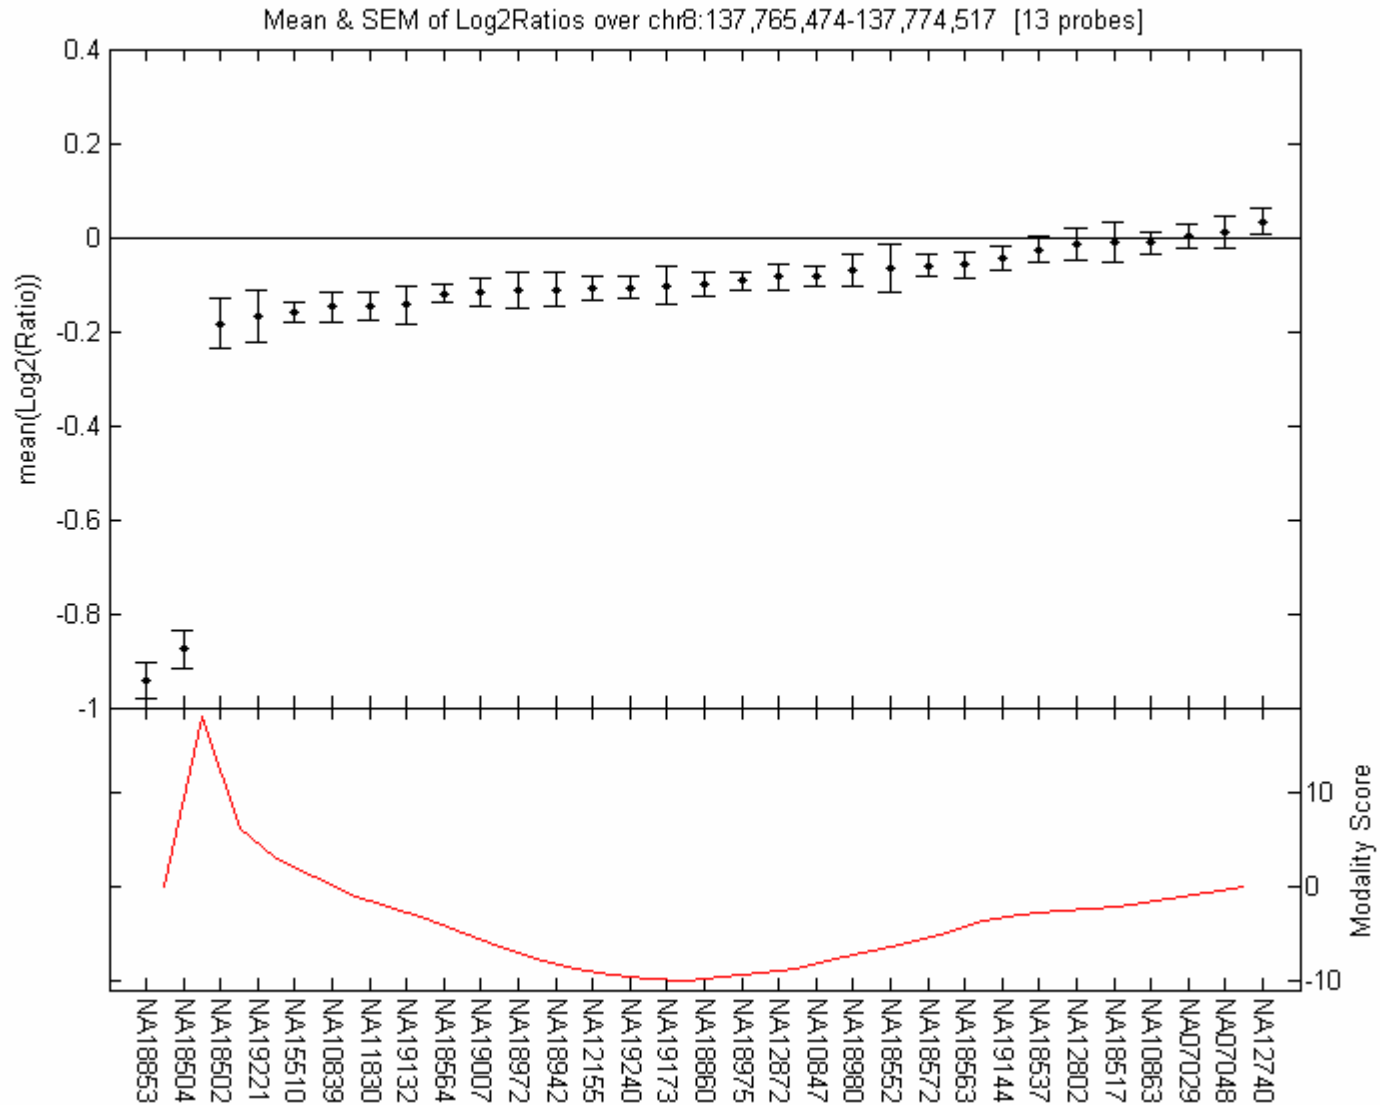



chr8:142,071,957-142,073,476 Score=13.7589

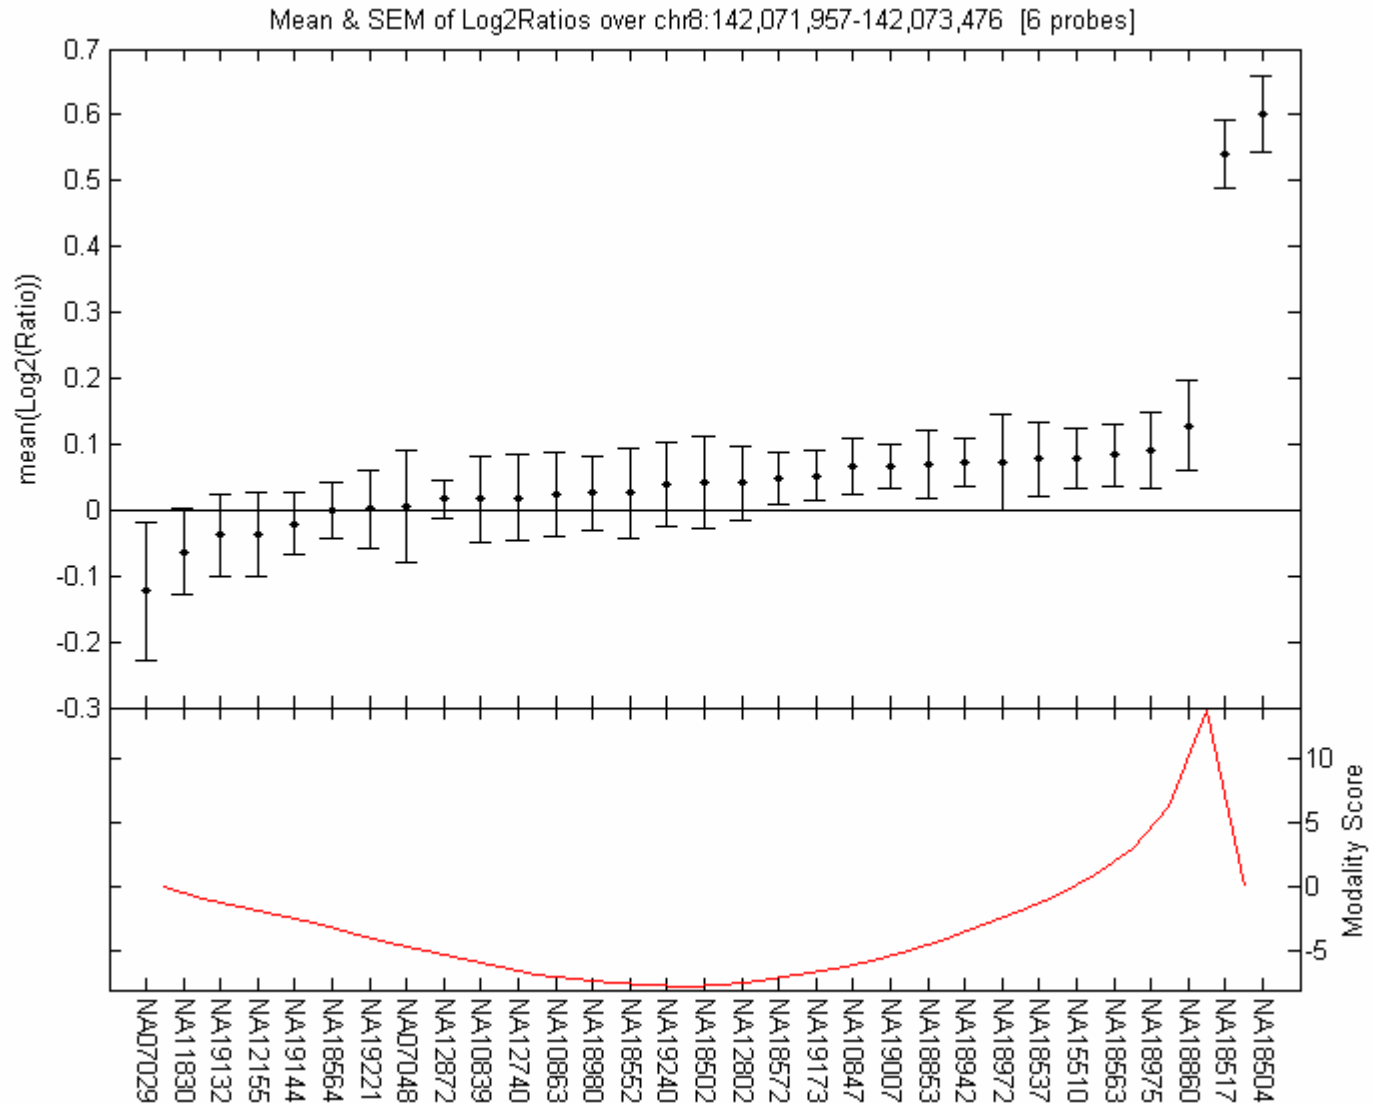

chr9:12,675,387-12,676,588 Score=13.2673

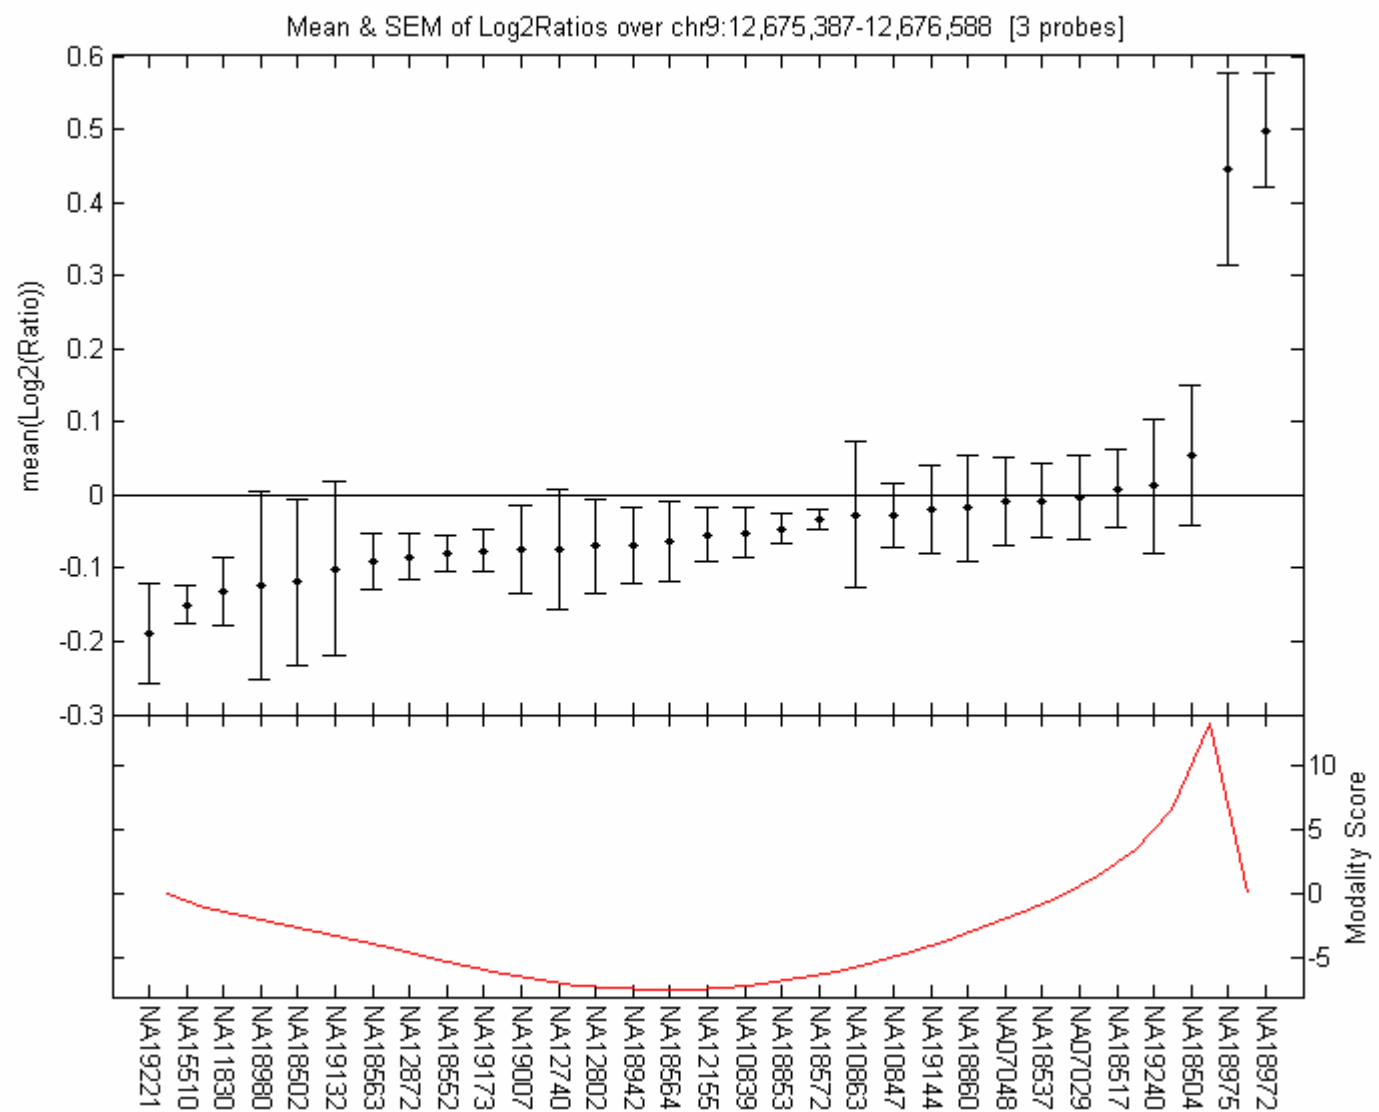

chr9:33,689,059-33,689,747 Score=11.2279

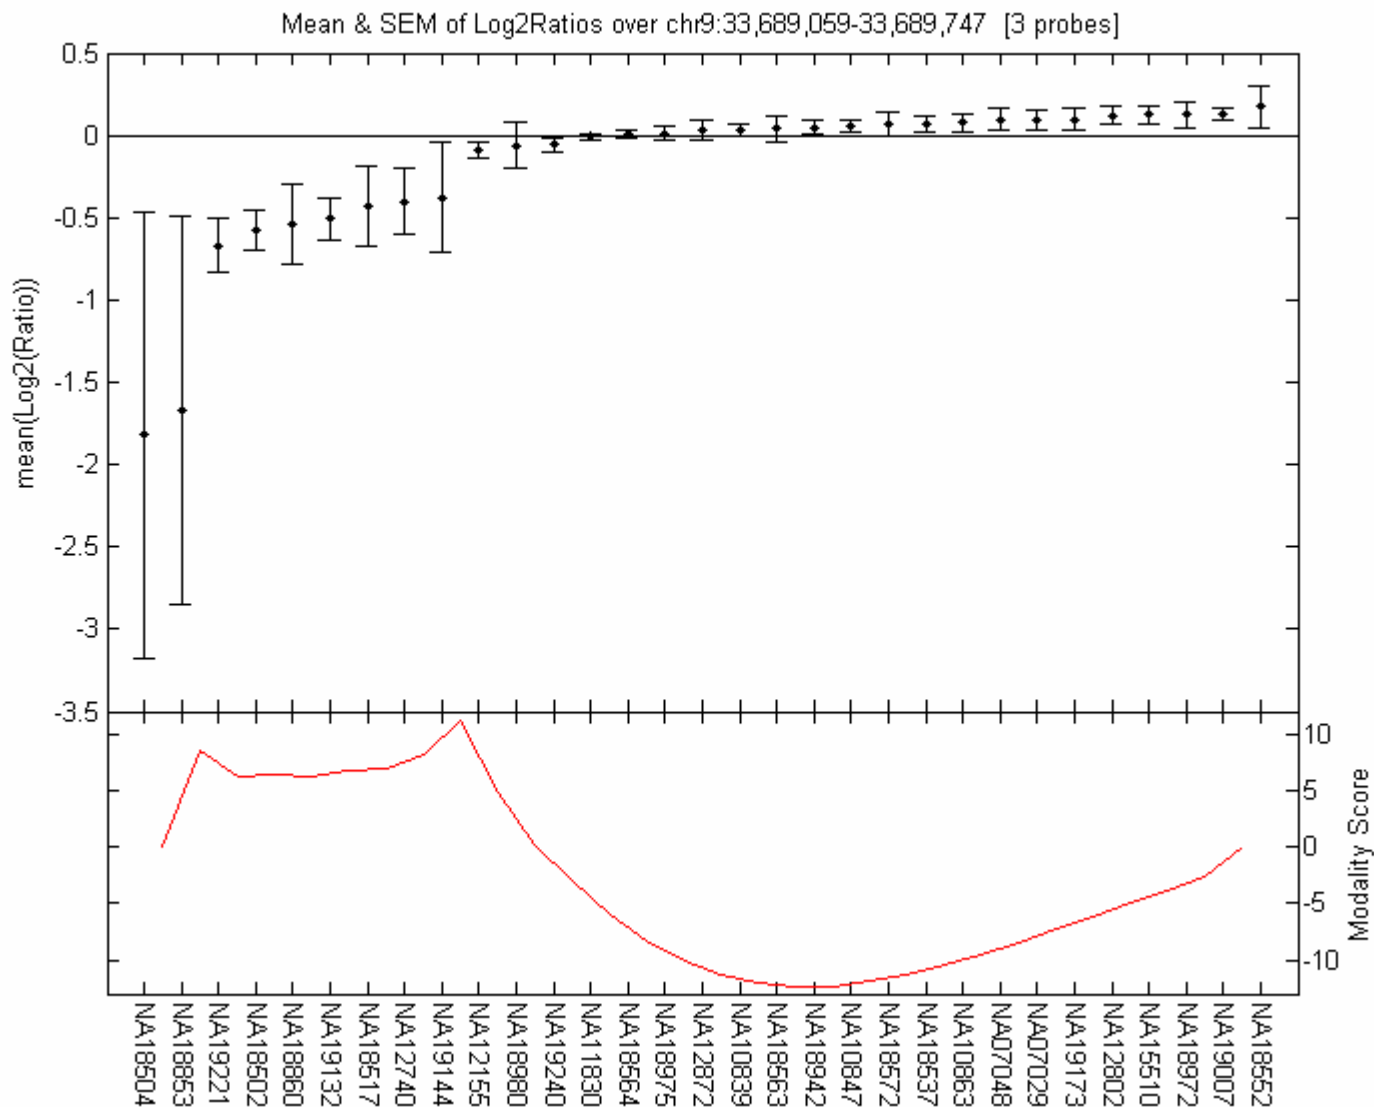

chr9:76,785,941-76,787,269 Score=11.7052

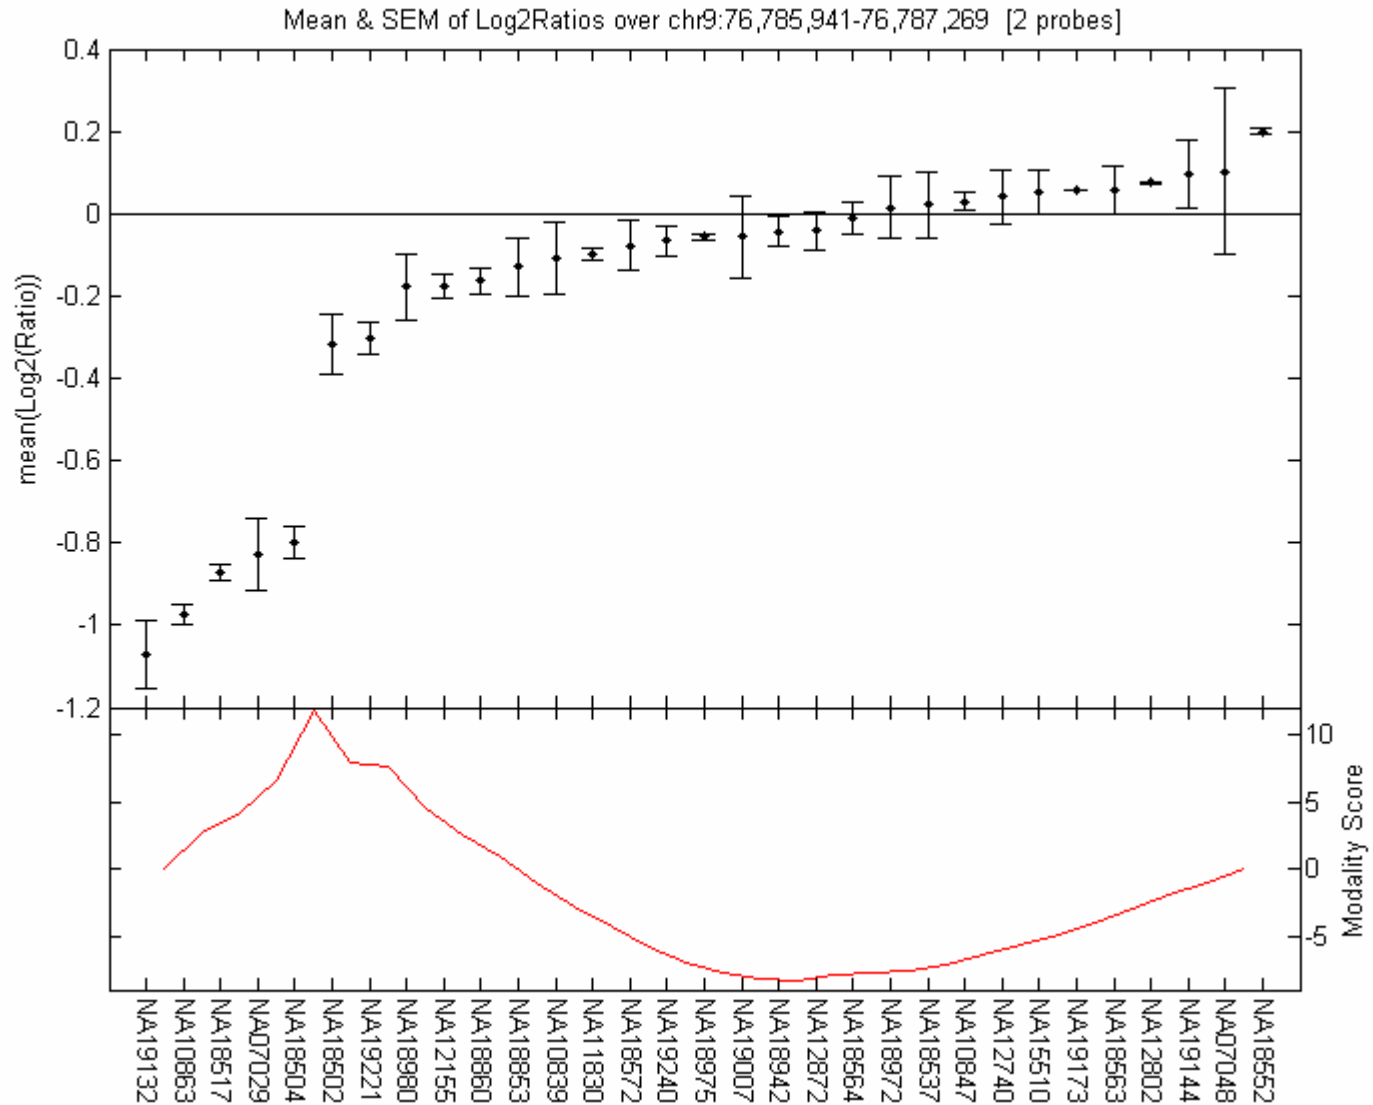

chr9:89,405,803-89,407,164 Score=21.7654

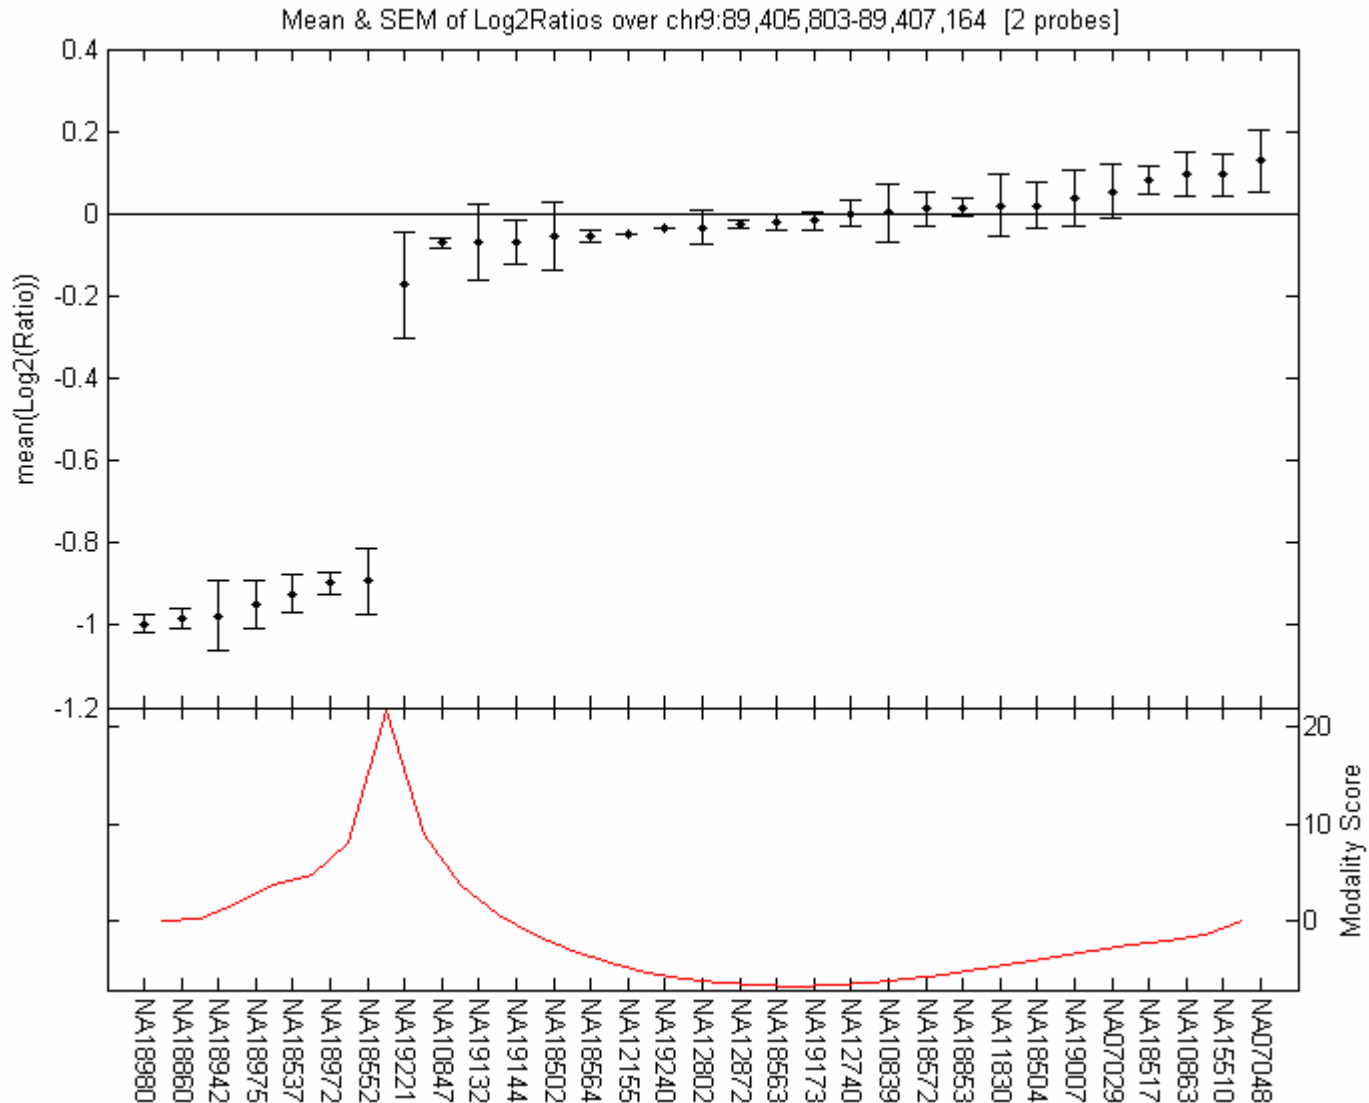

chr9:126,050,940-126,052,573 Score=24.1977

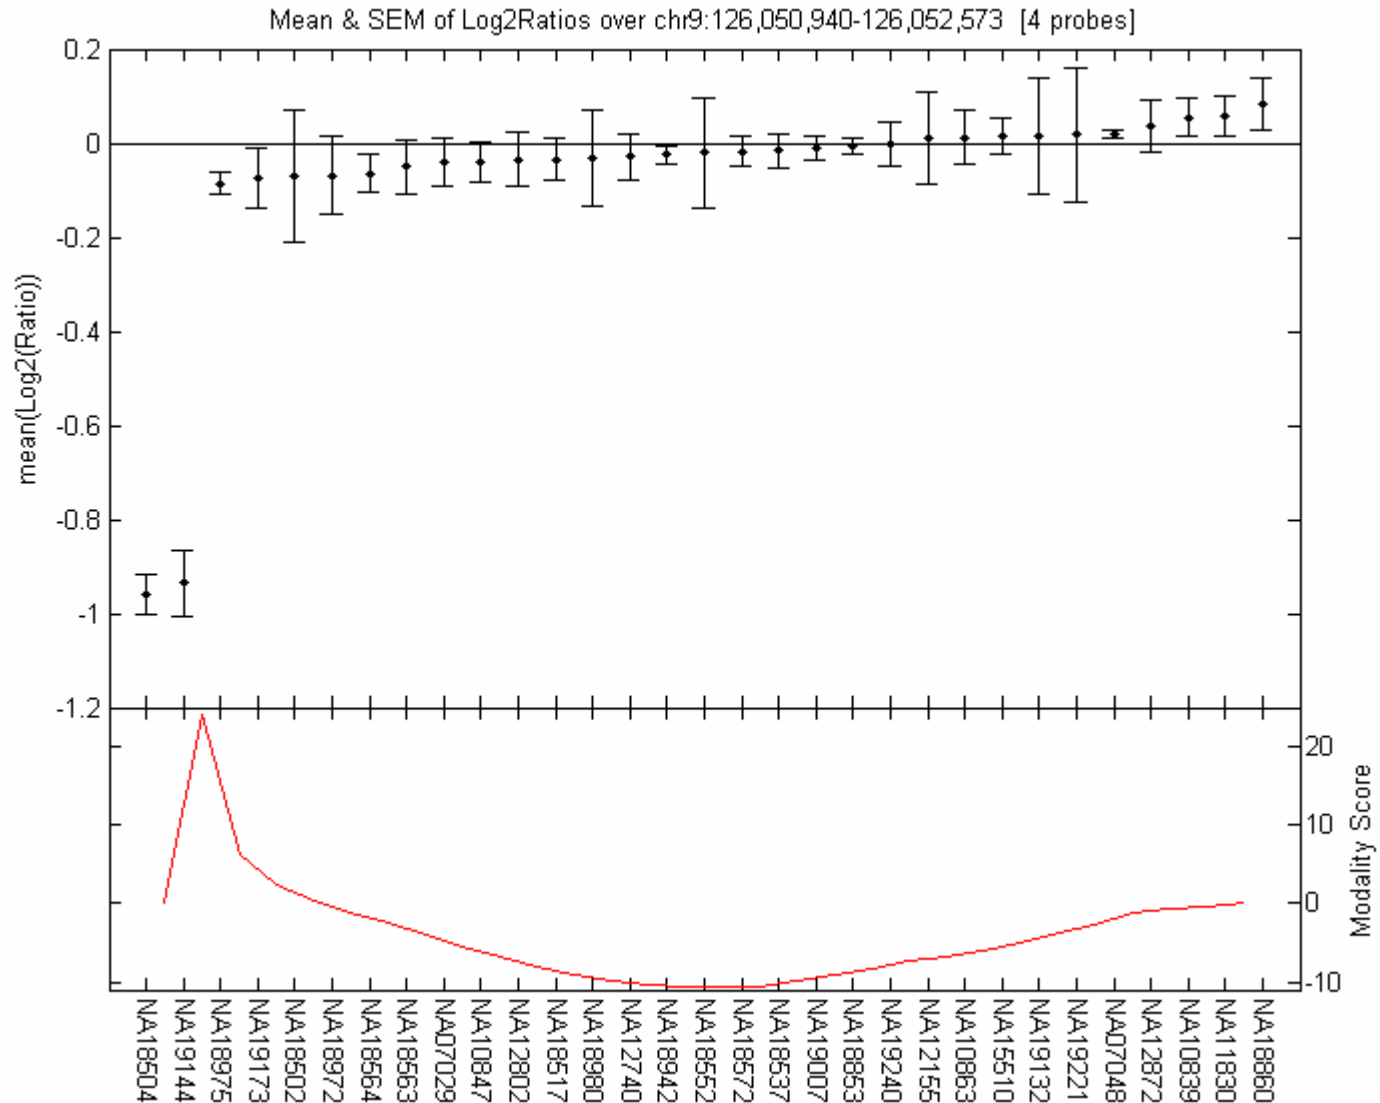

# chr9:131,291,547-131,295,316 Score=12.05

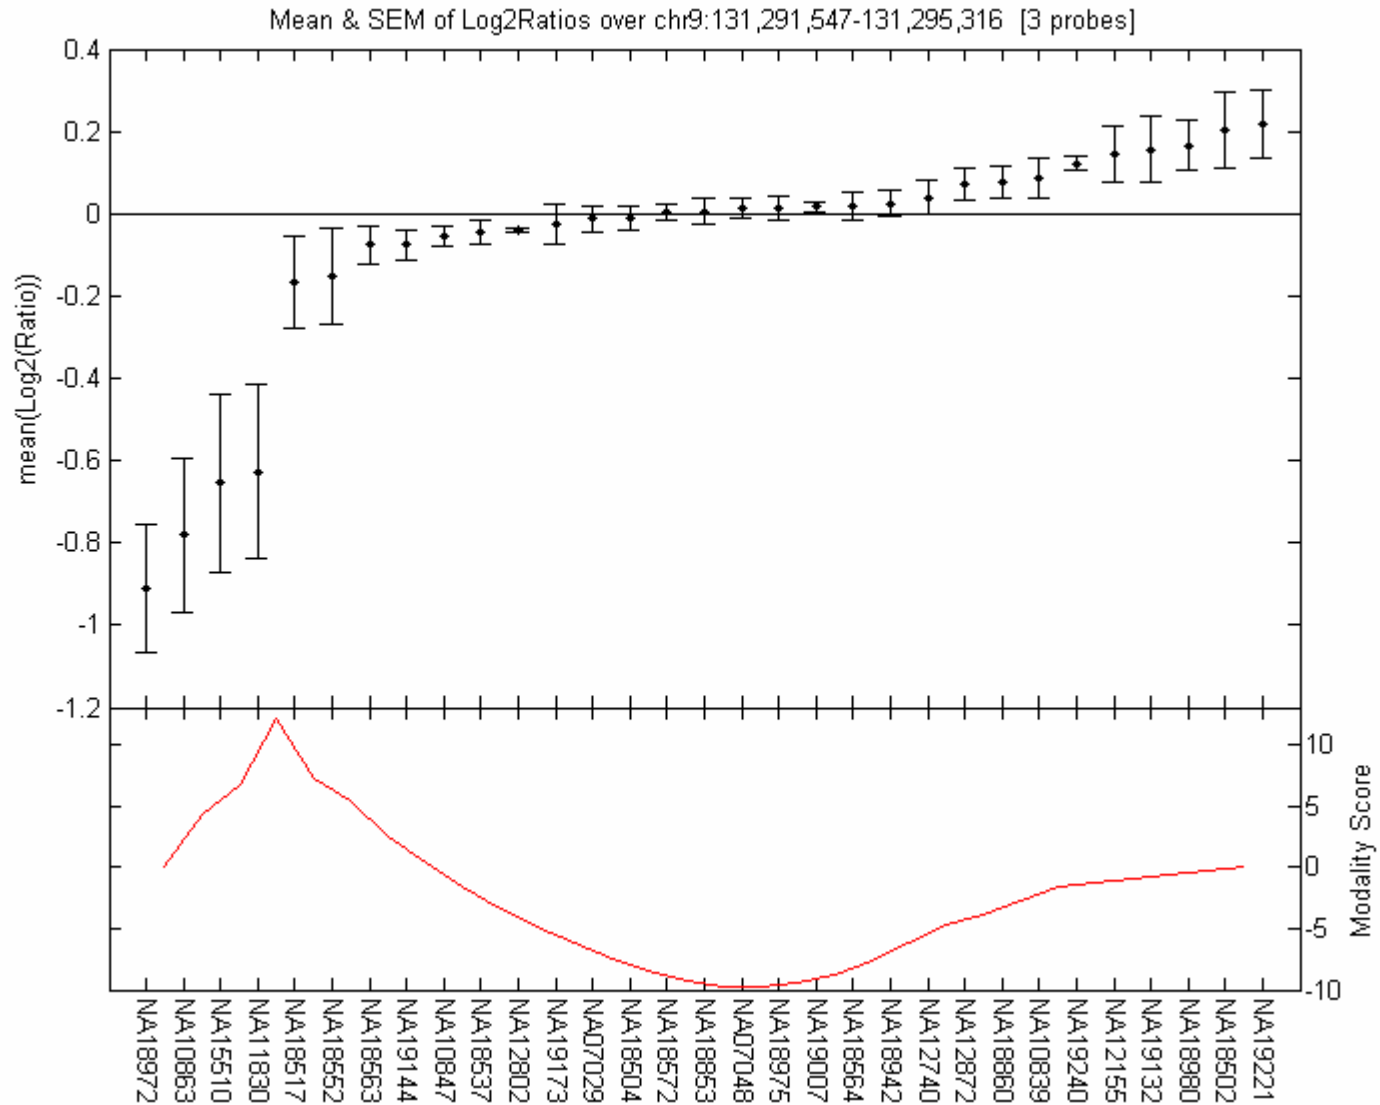

chr10:20,037,202-20,038,007 Score=10.7636

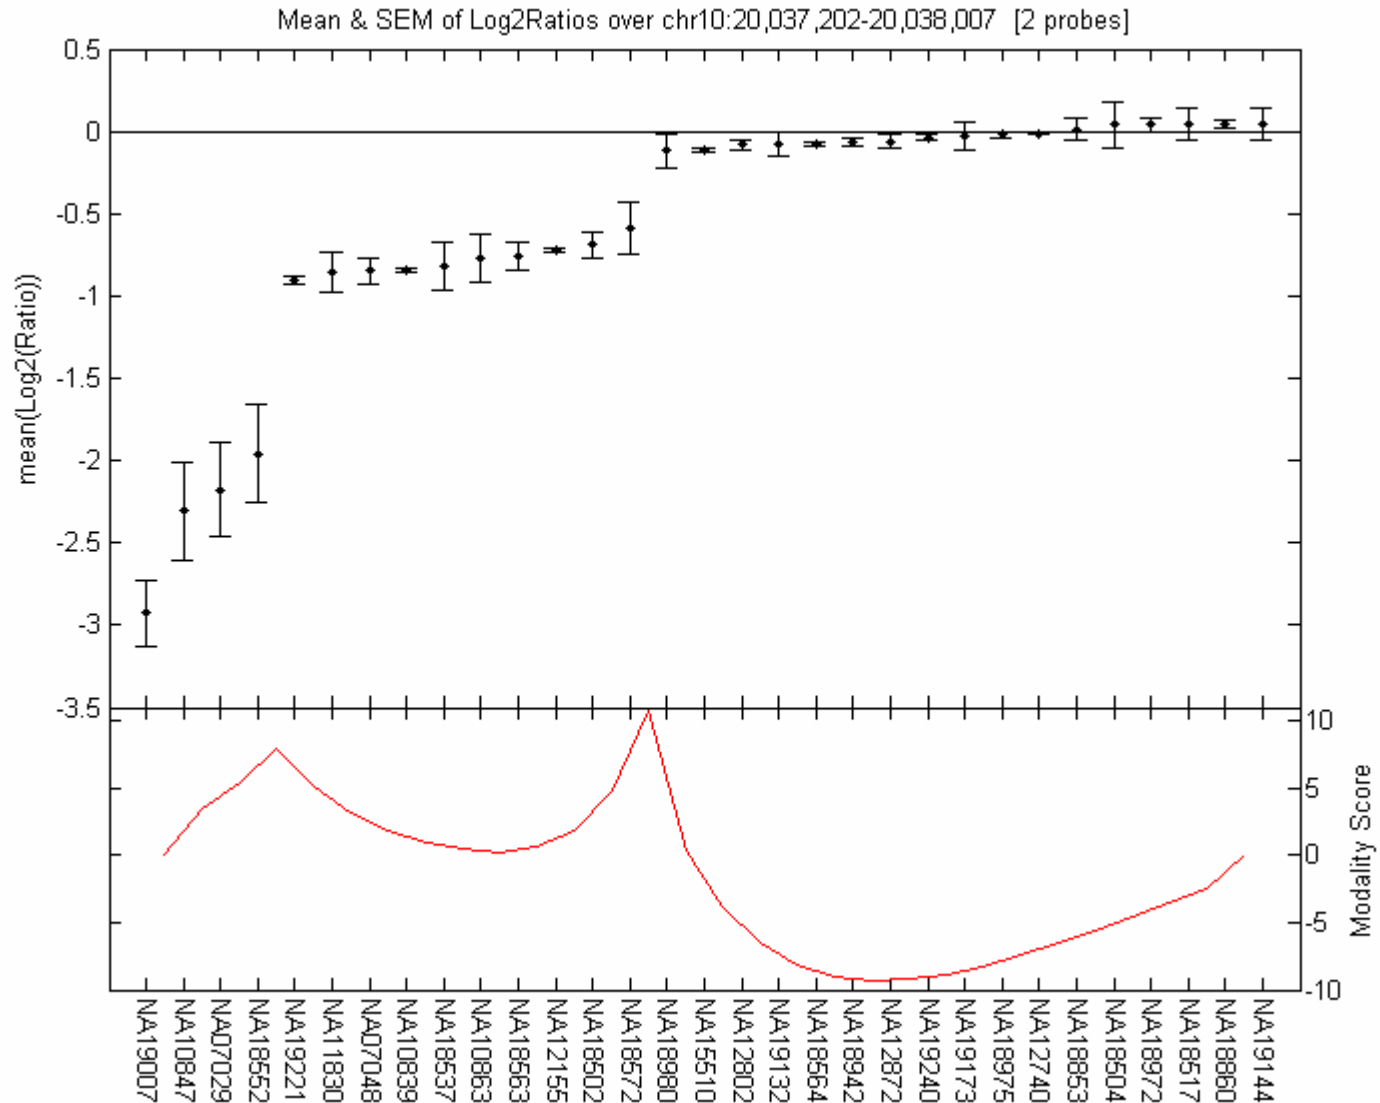



chr10:20,890,946-20,897,367 Score=15.1131

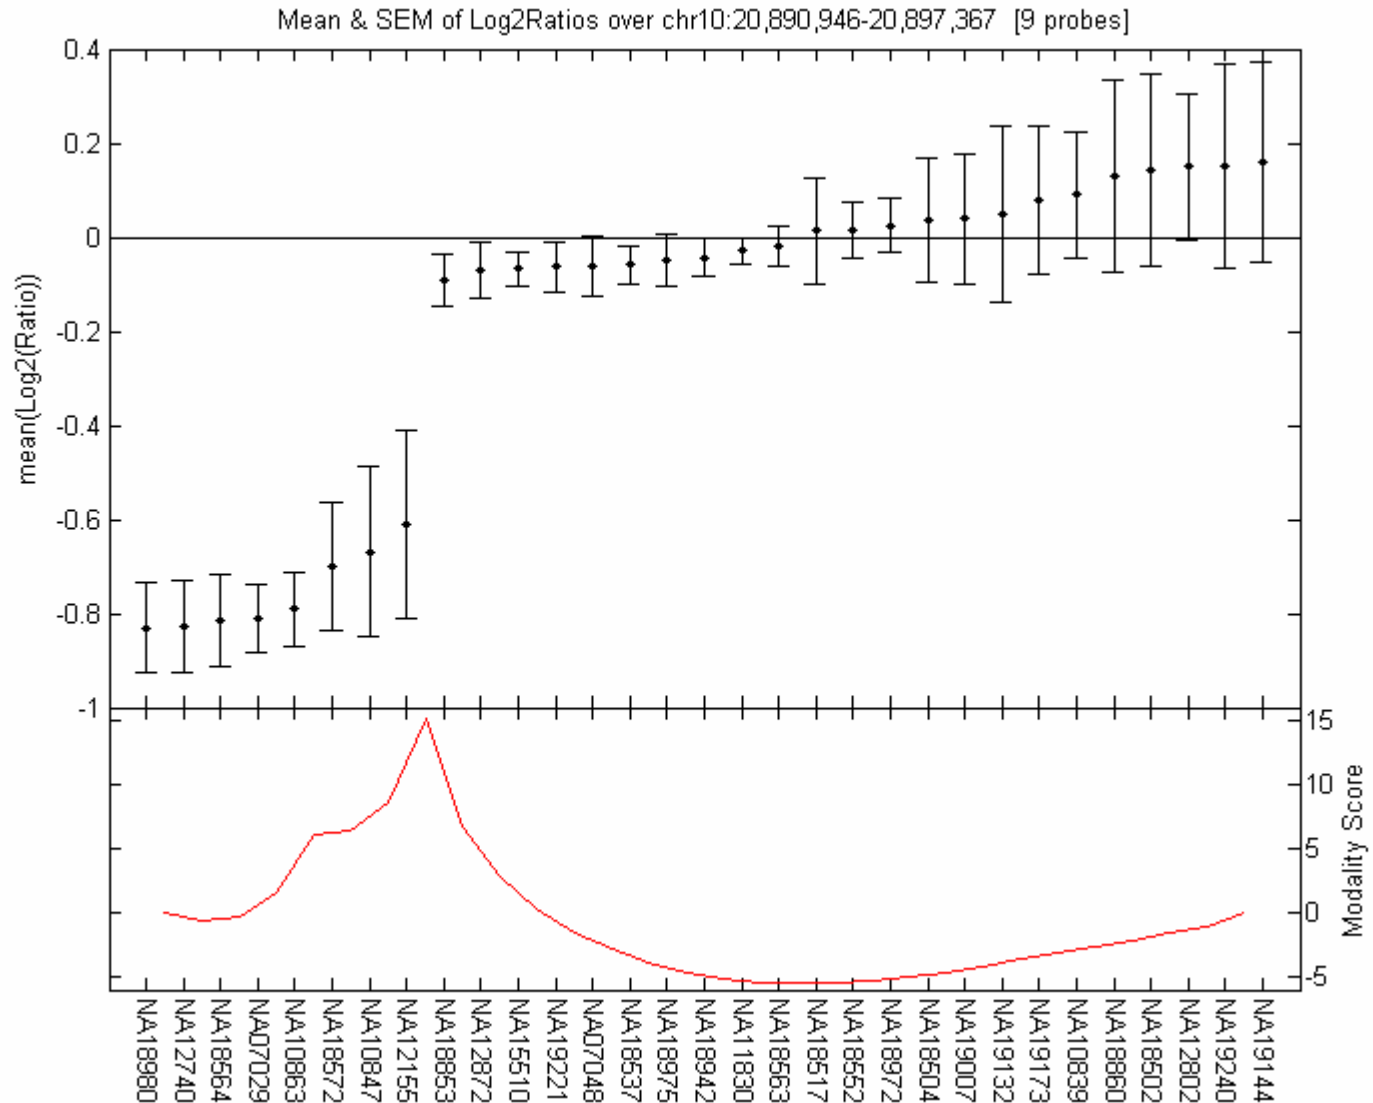

chr10:37,856,644-37,861,684 Score=13.9868

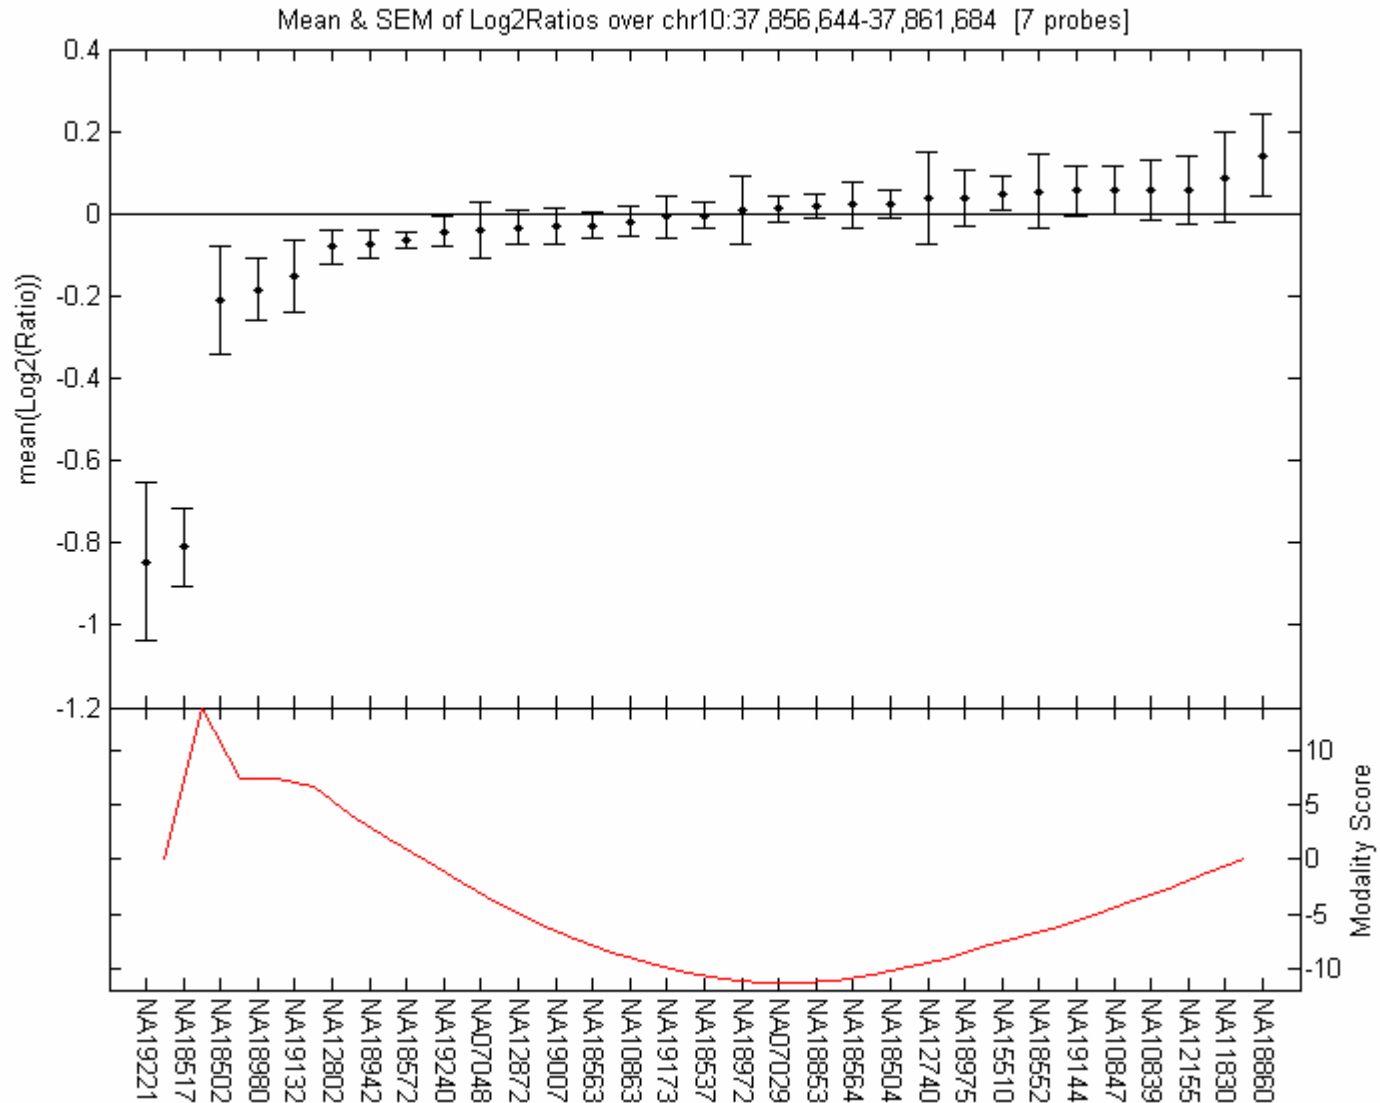

chr10:45,625,486-45,626,243 Score=18.0288

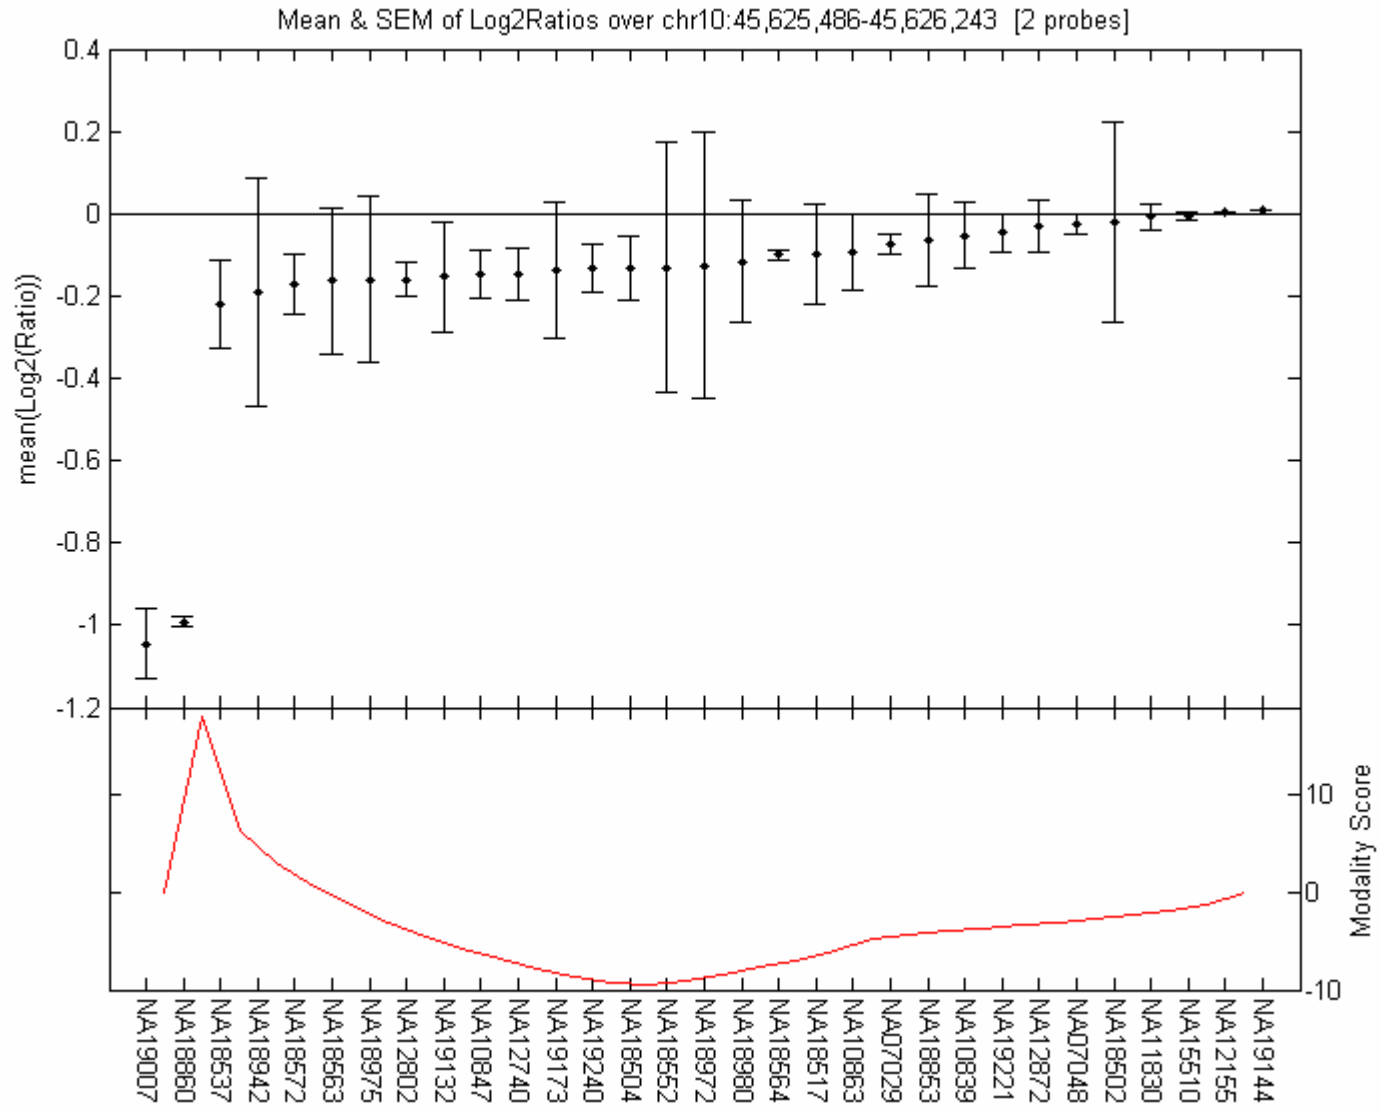

chr10:45,744,441-45,744,478 Score=12.3301

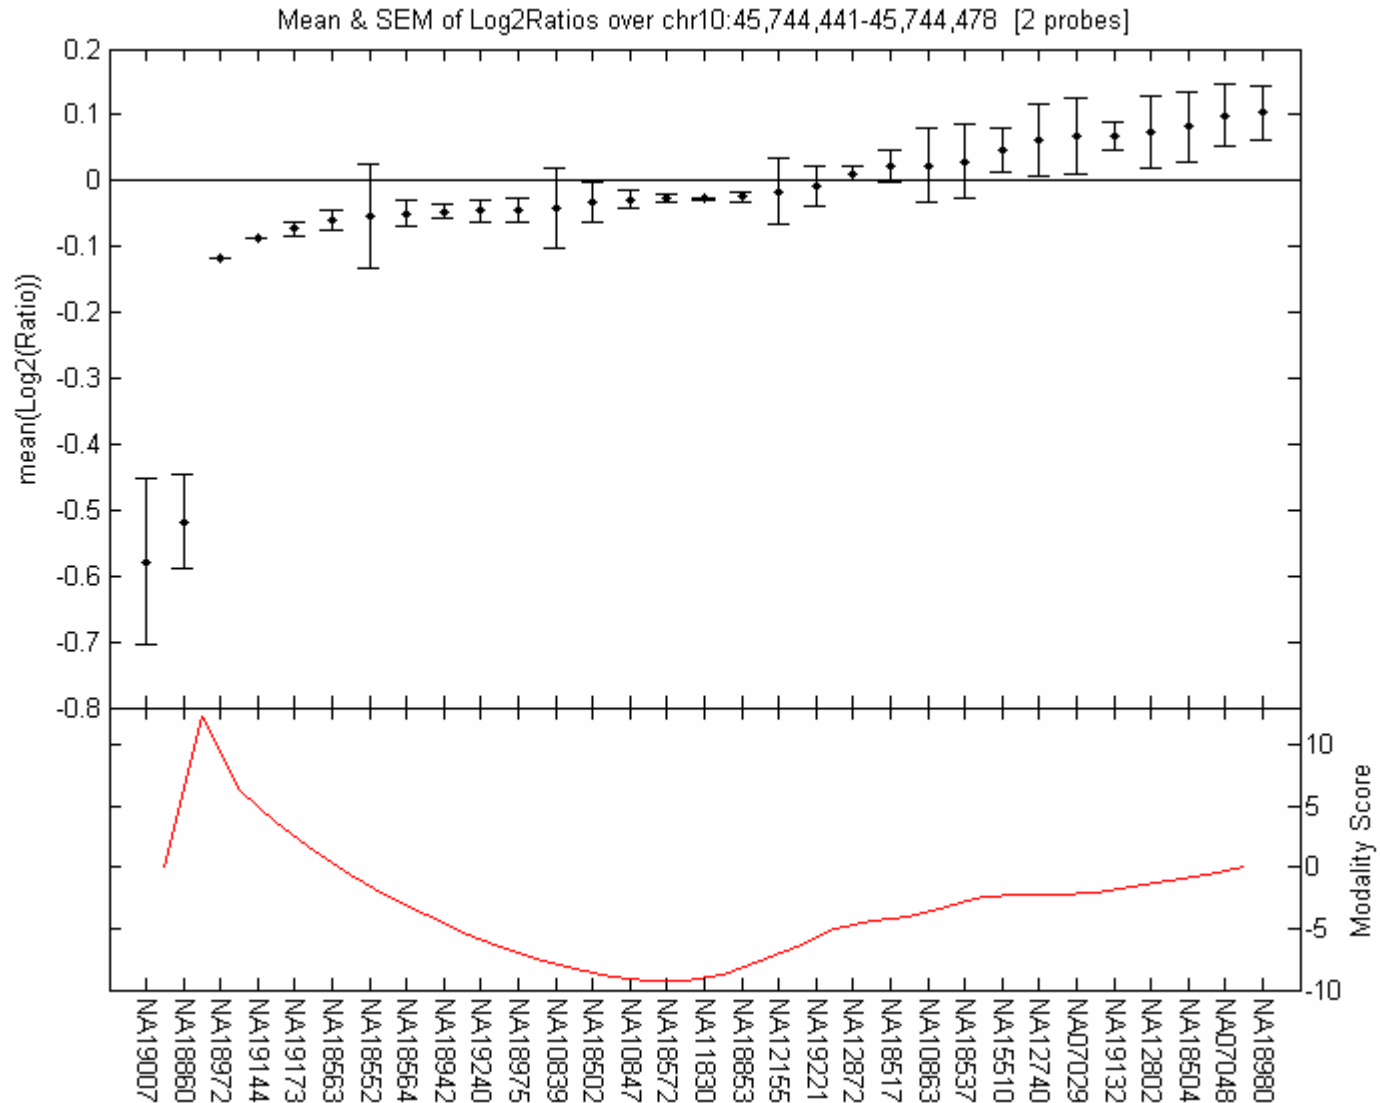

chr10:51,186,730-51,187,158 Score=17.6566

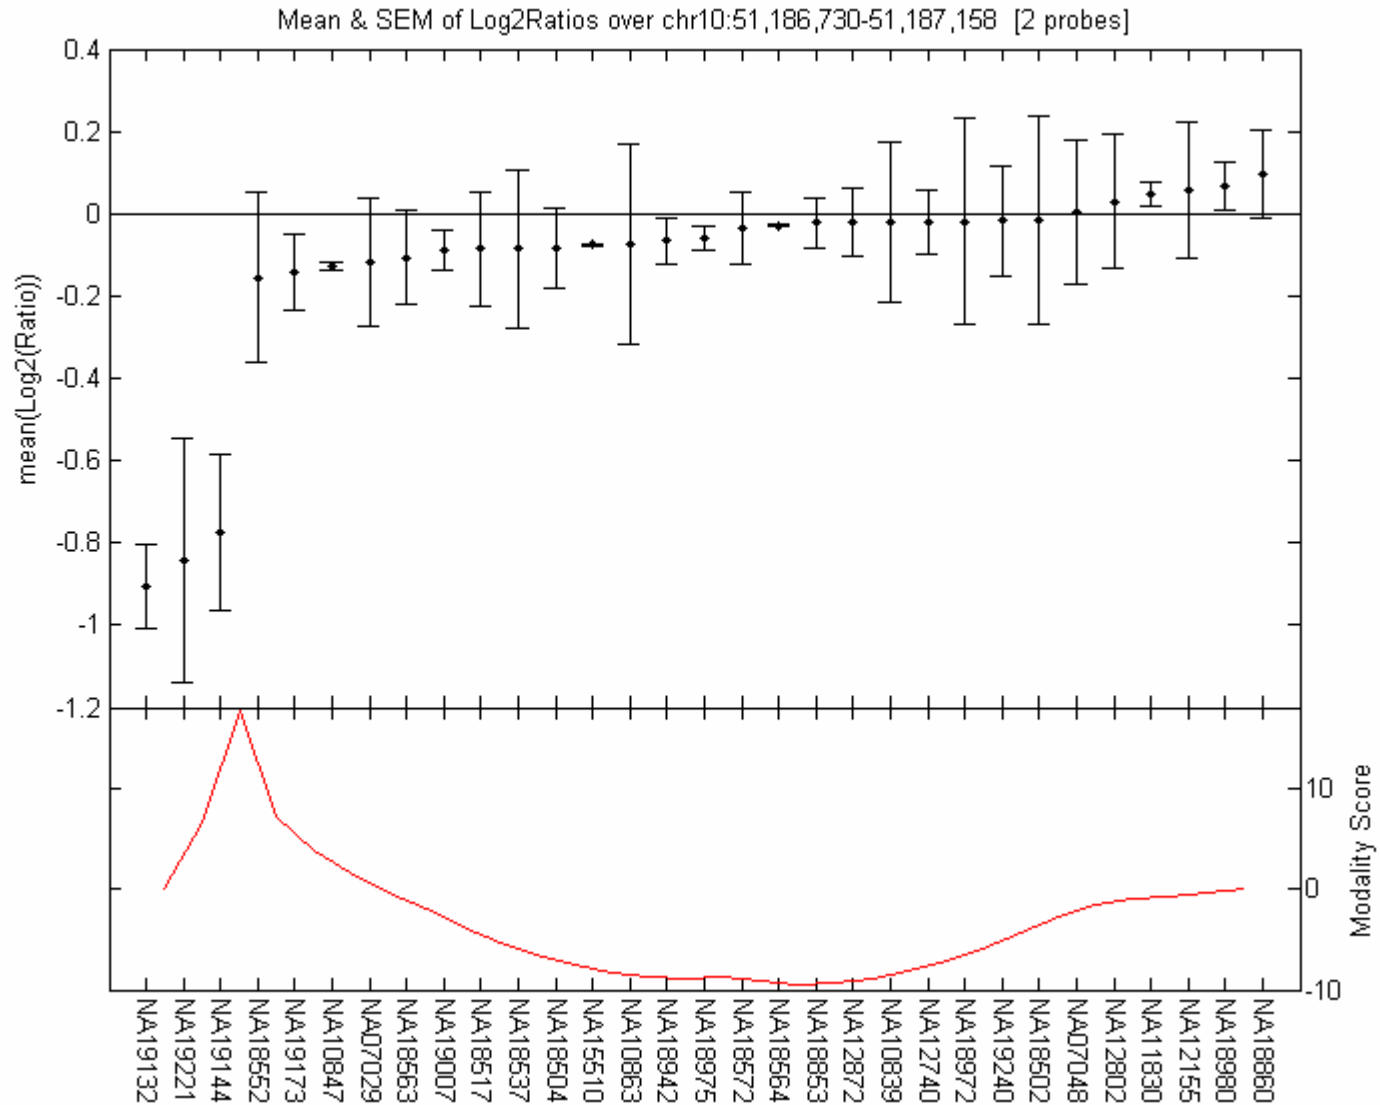

chr10:51,336,806-51,336,843 Score=12.3301

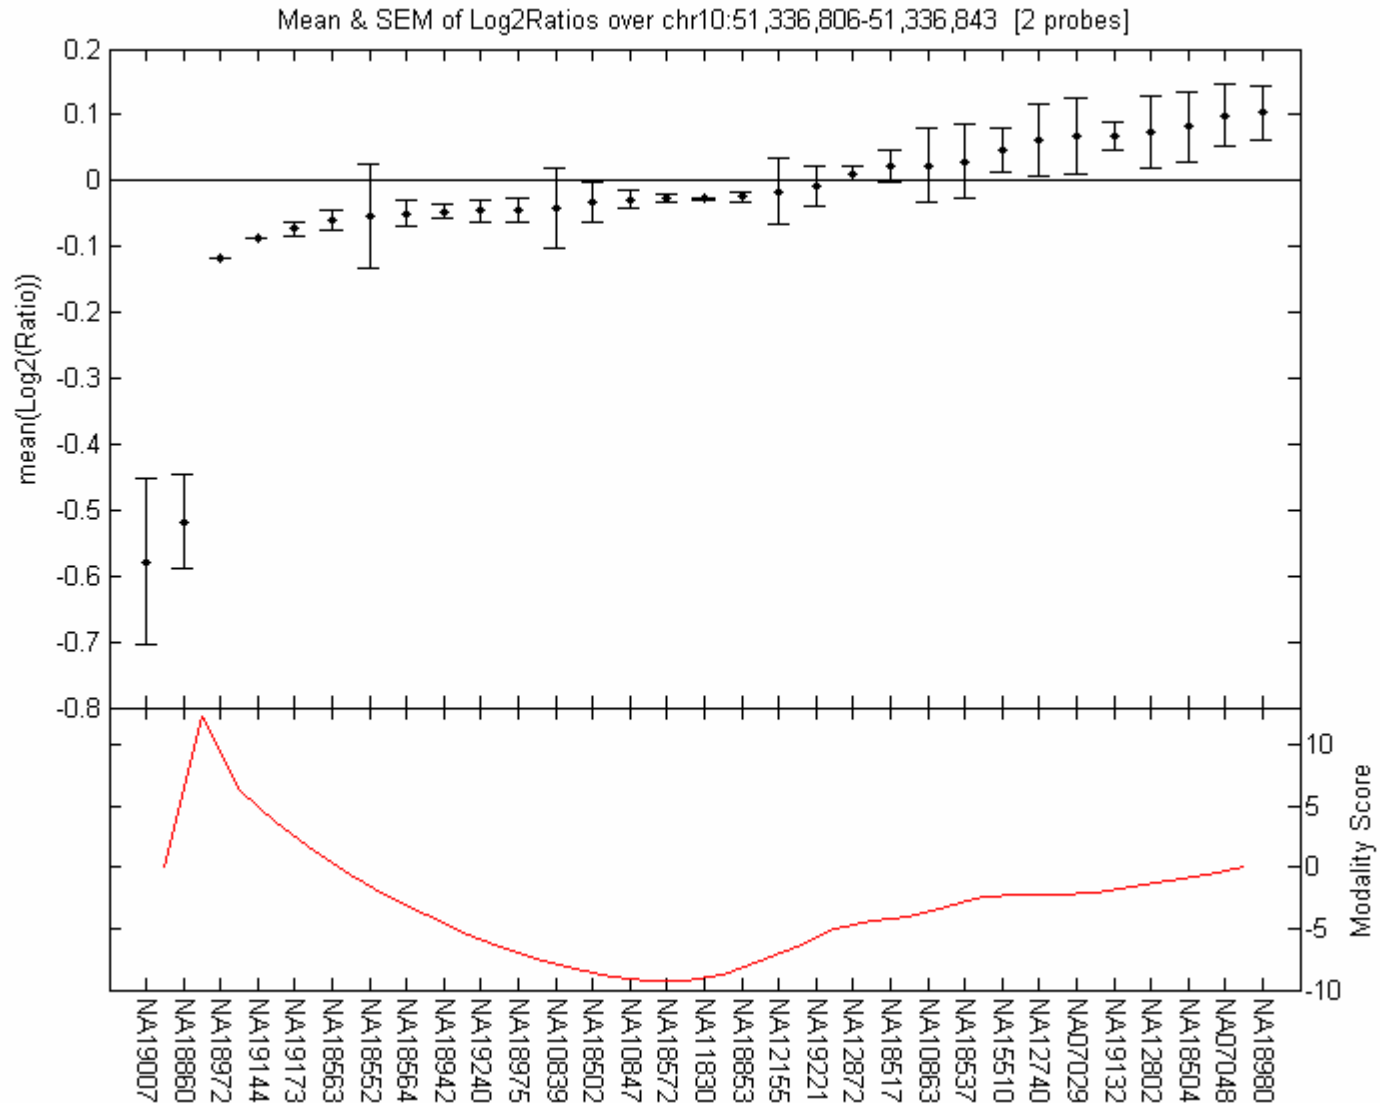

chr10:58,879,849-58,881,863 Score=12.6676

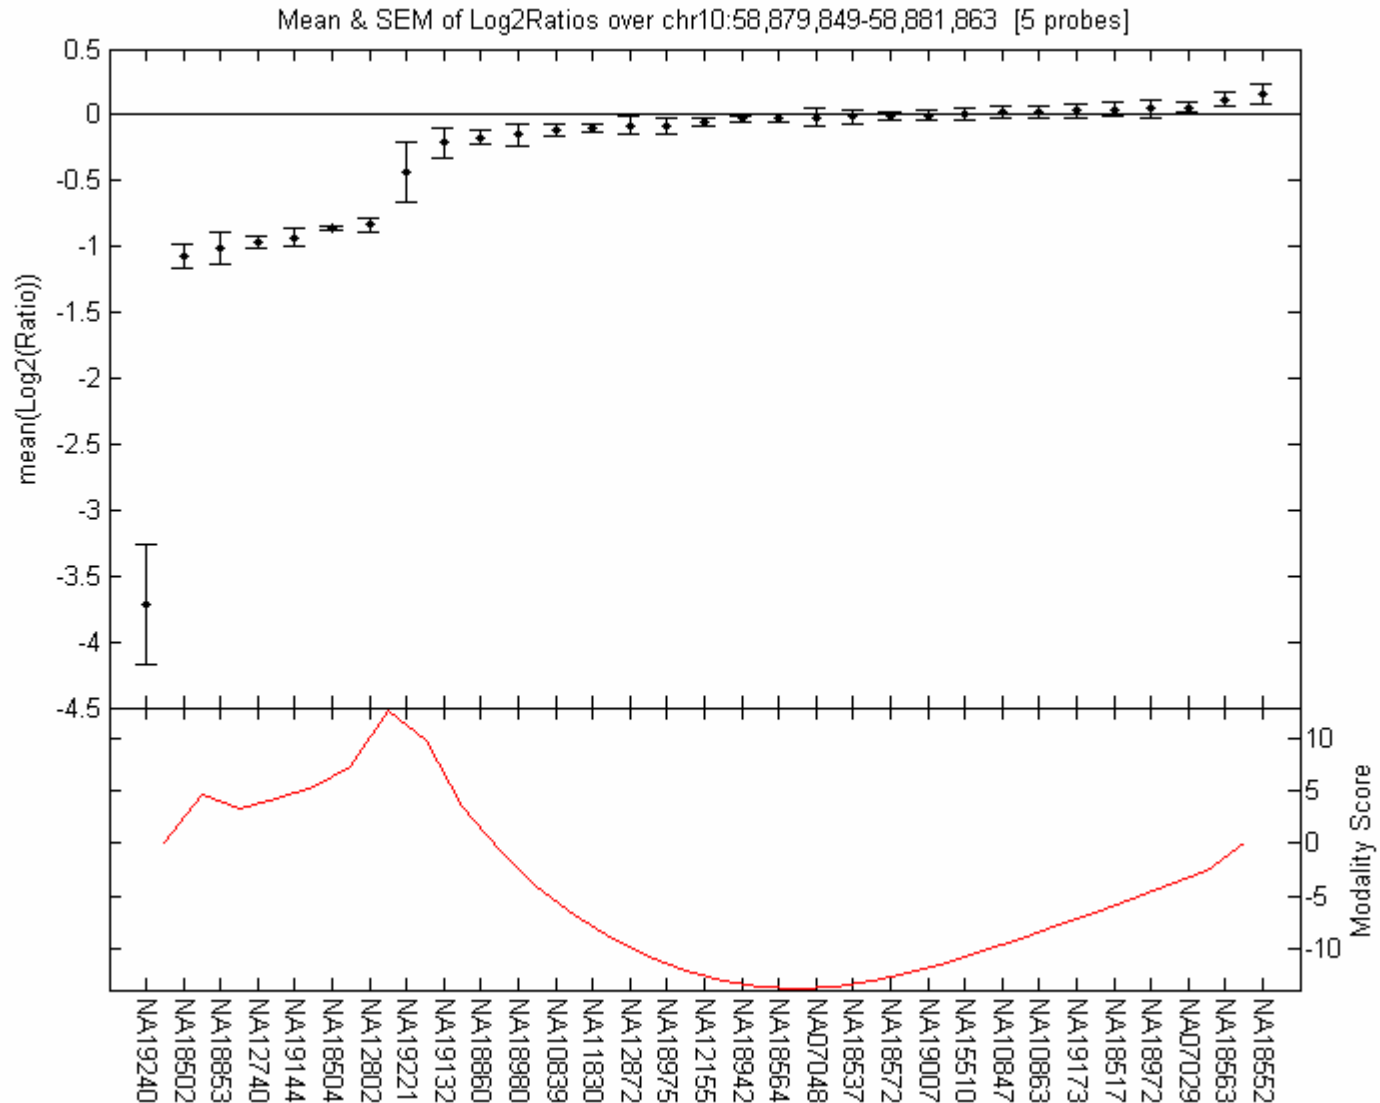

chr10:62,097,313-62,097,872 Score=22.6493

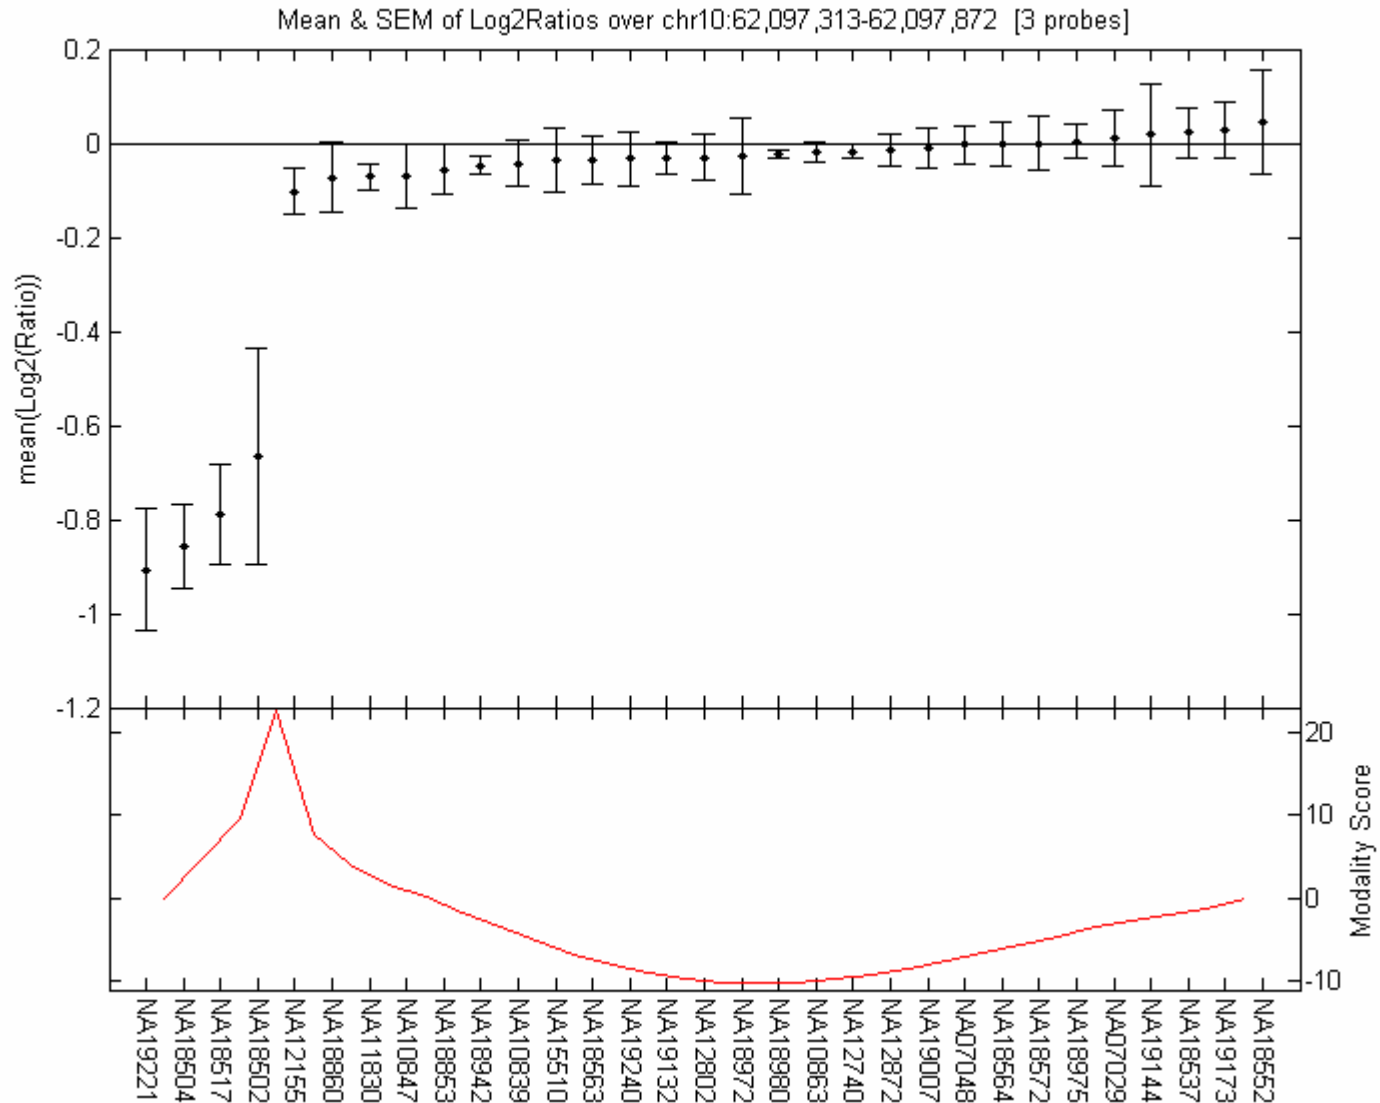



chr10:66,977,908-66,984,894 Score=7.1514

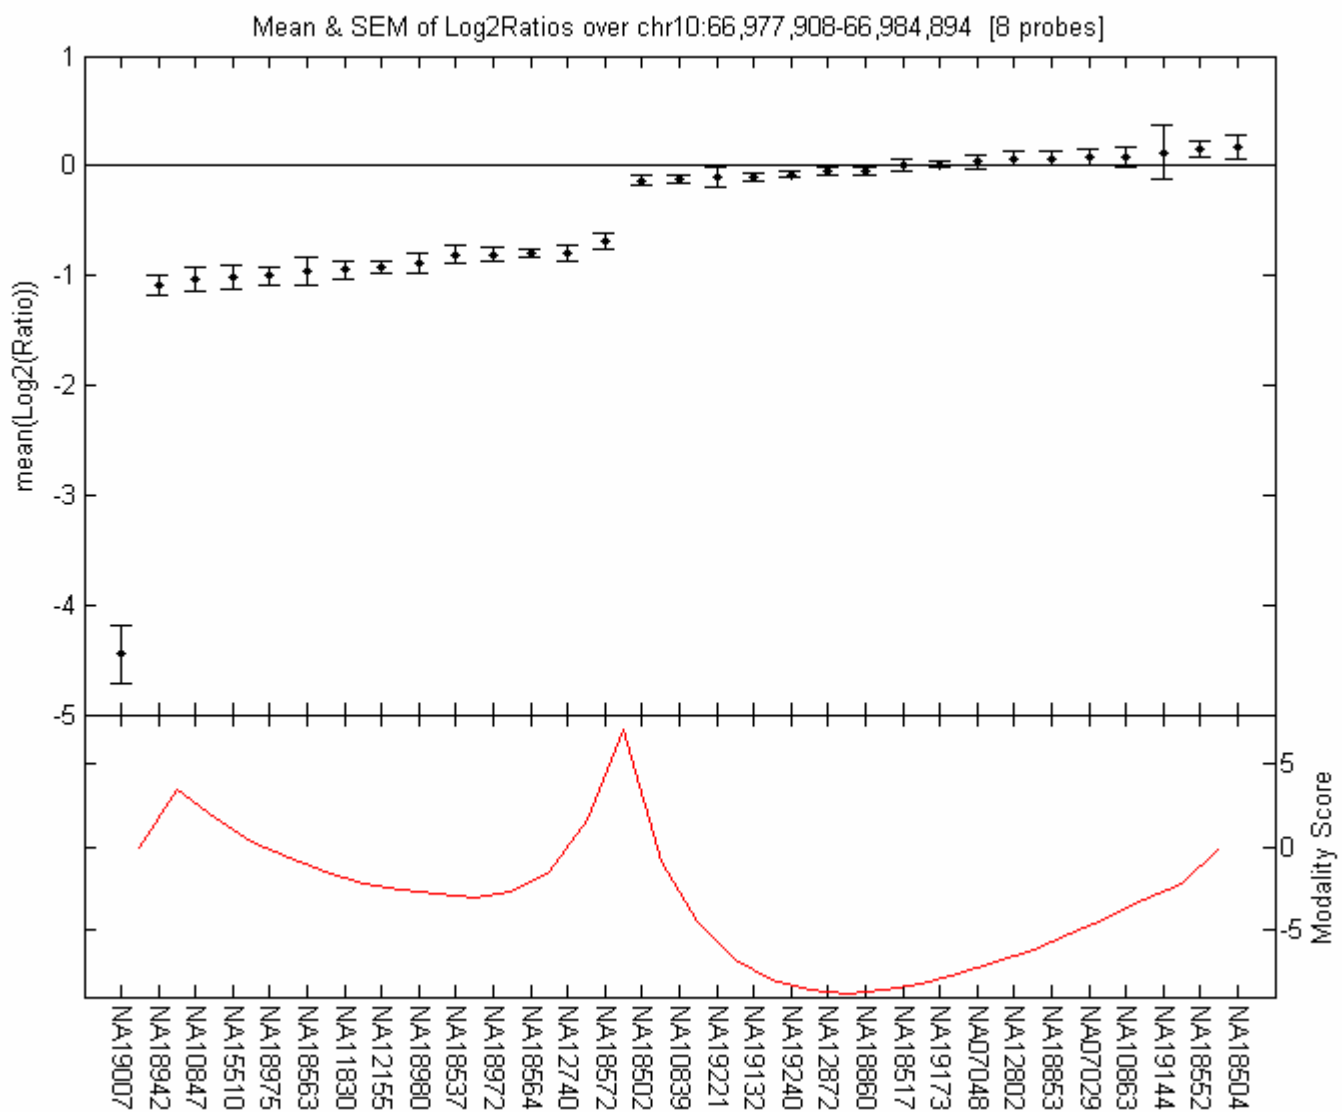

chr10:114,102,788-114,105,867 Score=16.3149

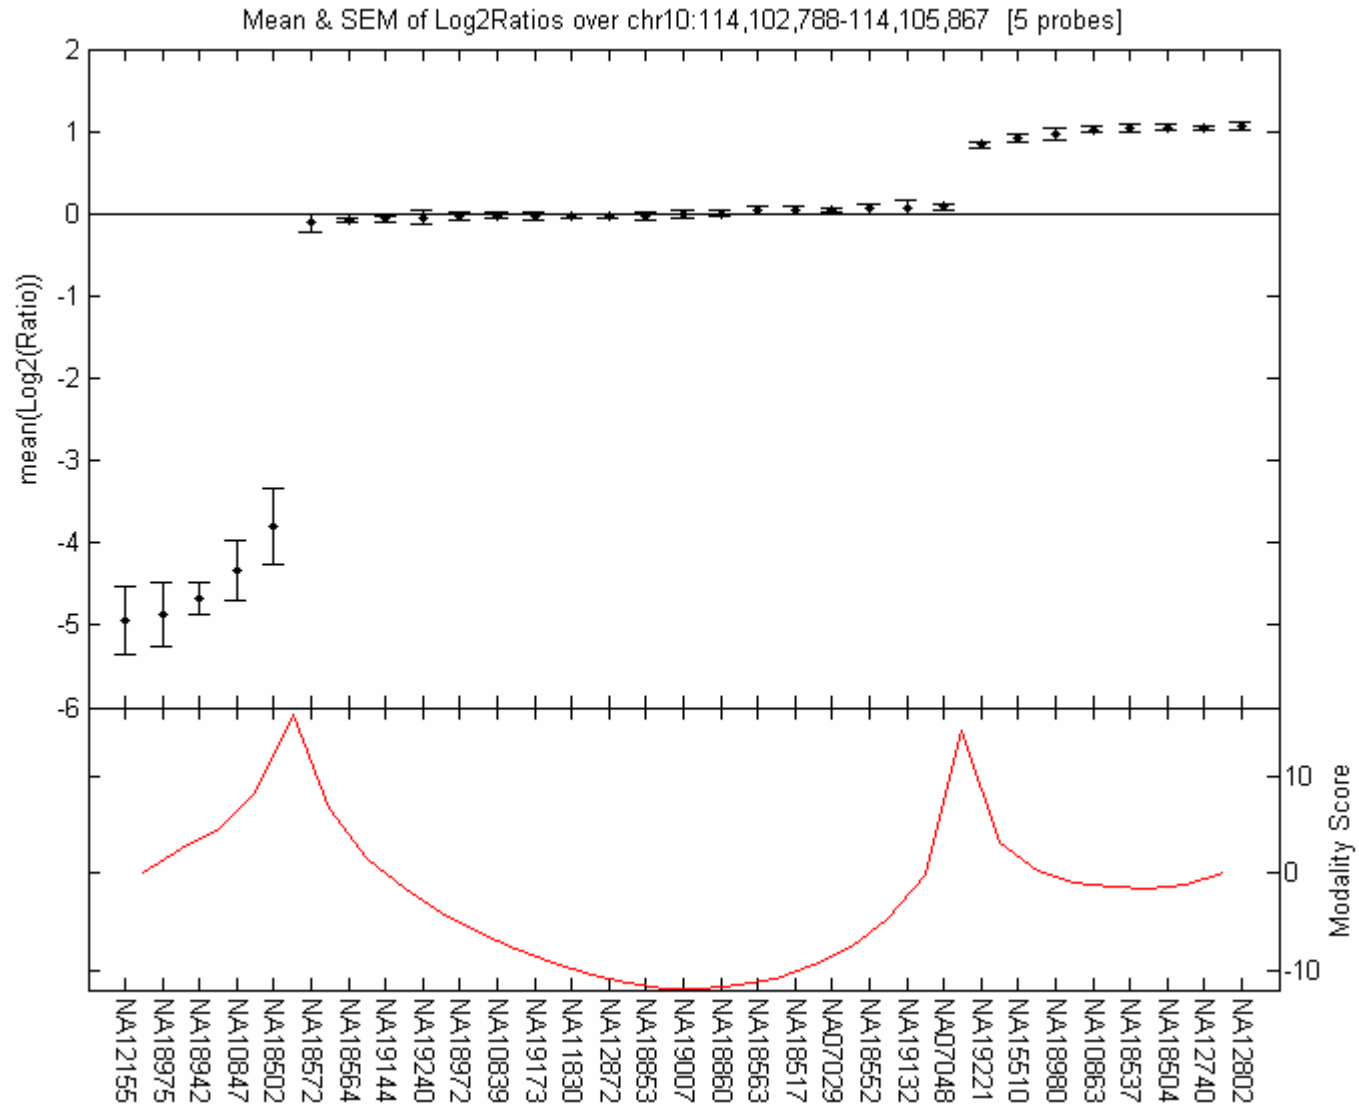

# chr11:1,049,258-1,050,008 Score=13.153

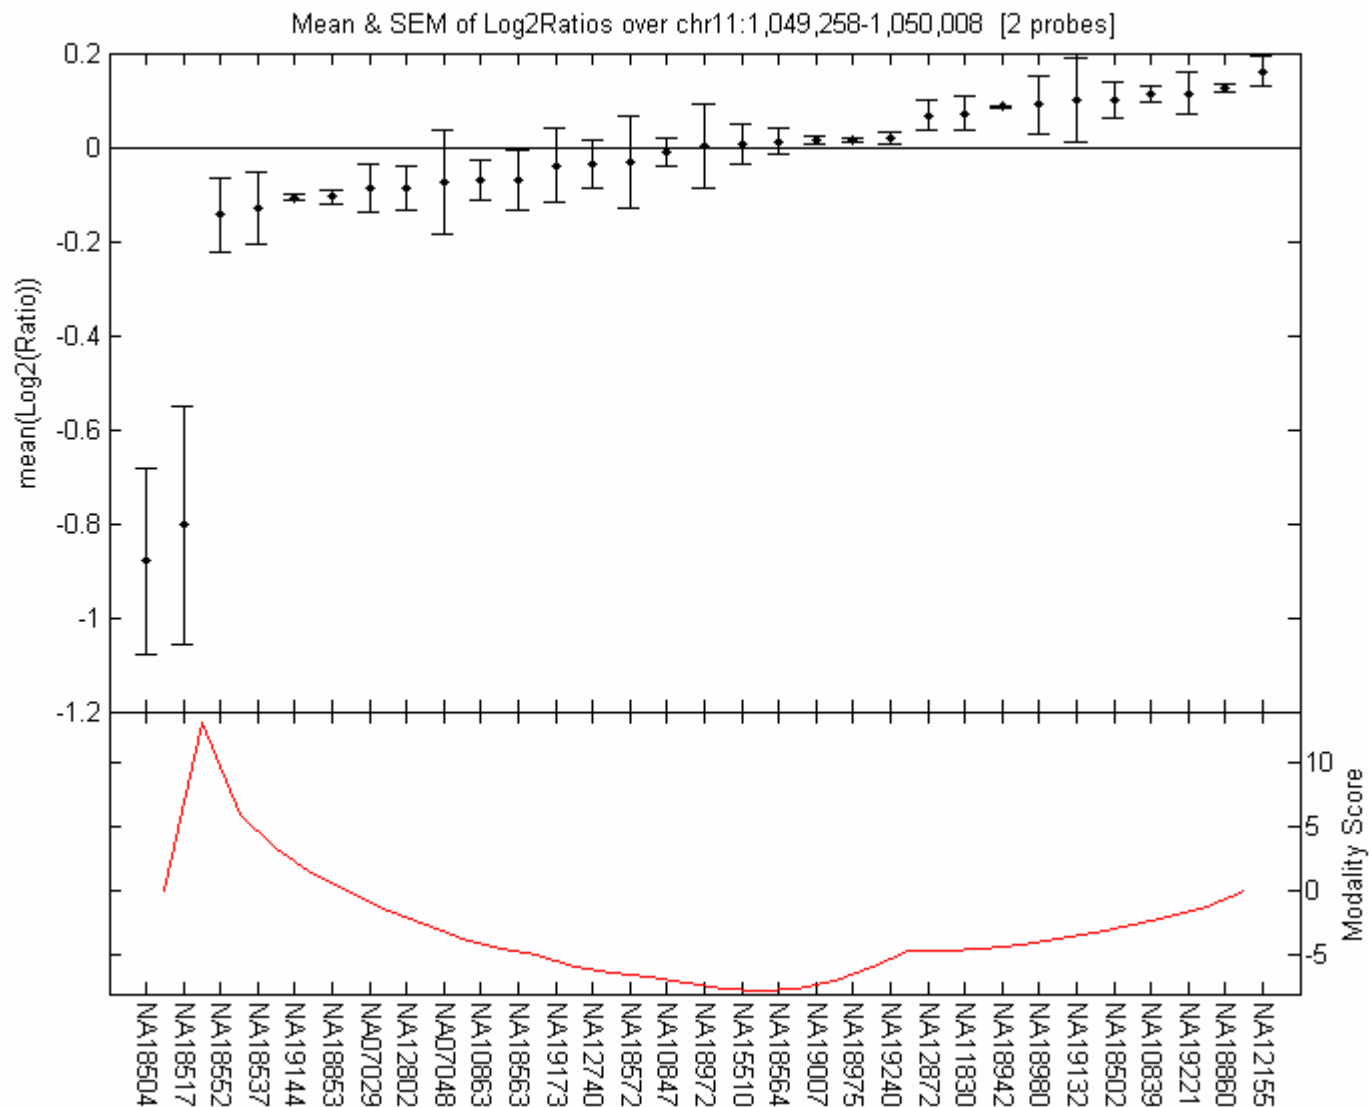

chr11:3,342,218-3,345,938 Score=15.8036

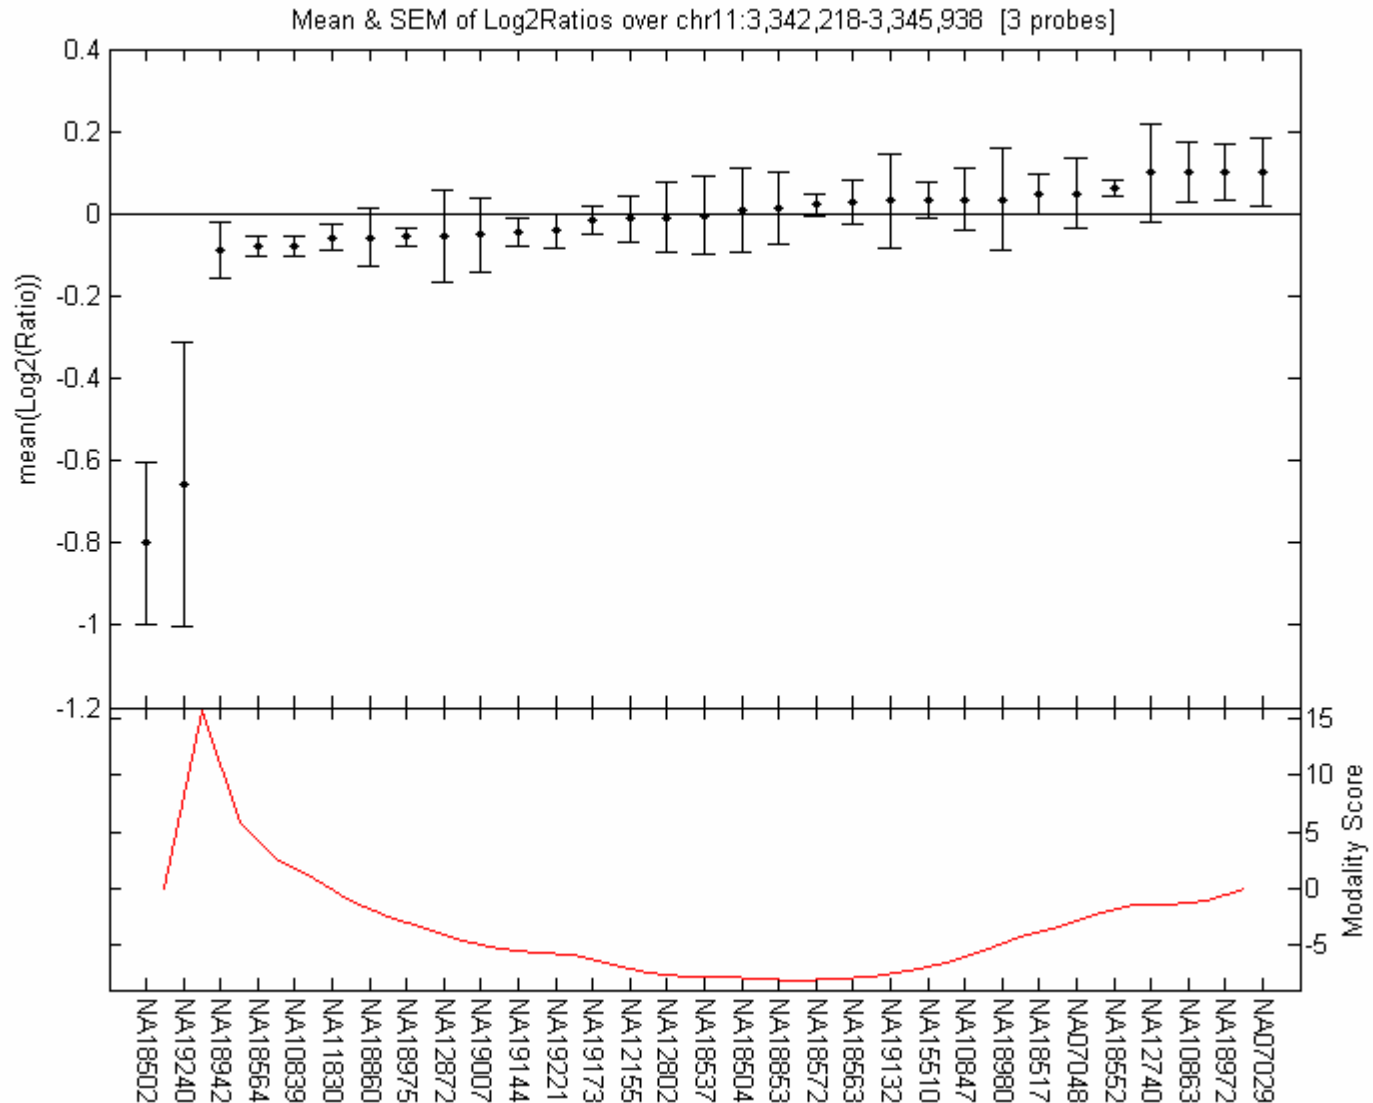

chr11:11,780,486-11,781,057 Score=9.6313

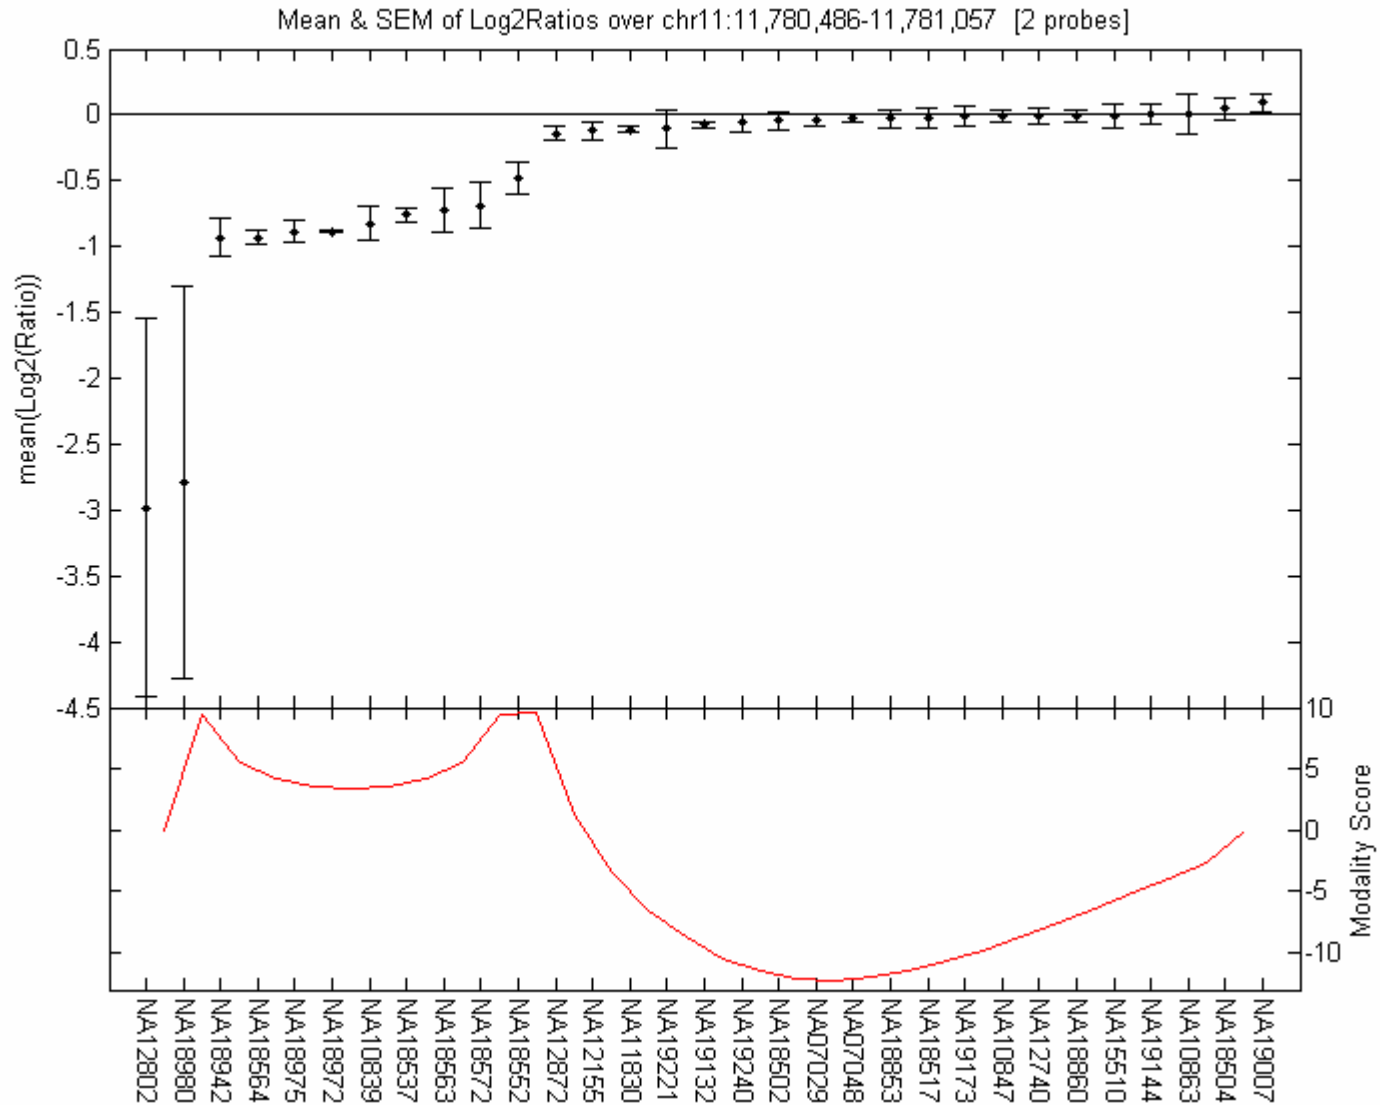

chr11:21,803,918-21,805,682 Score=14.6755

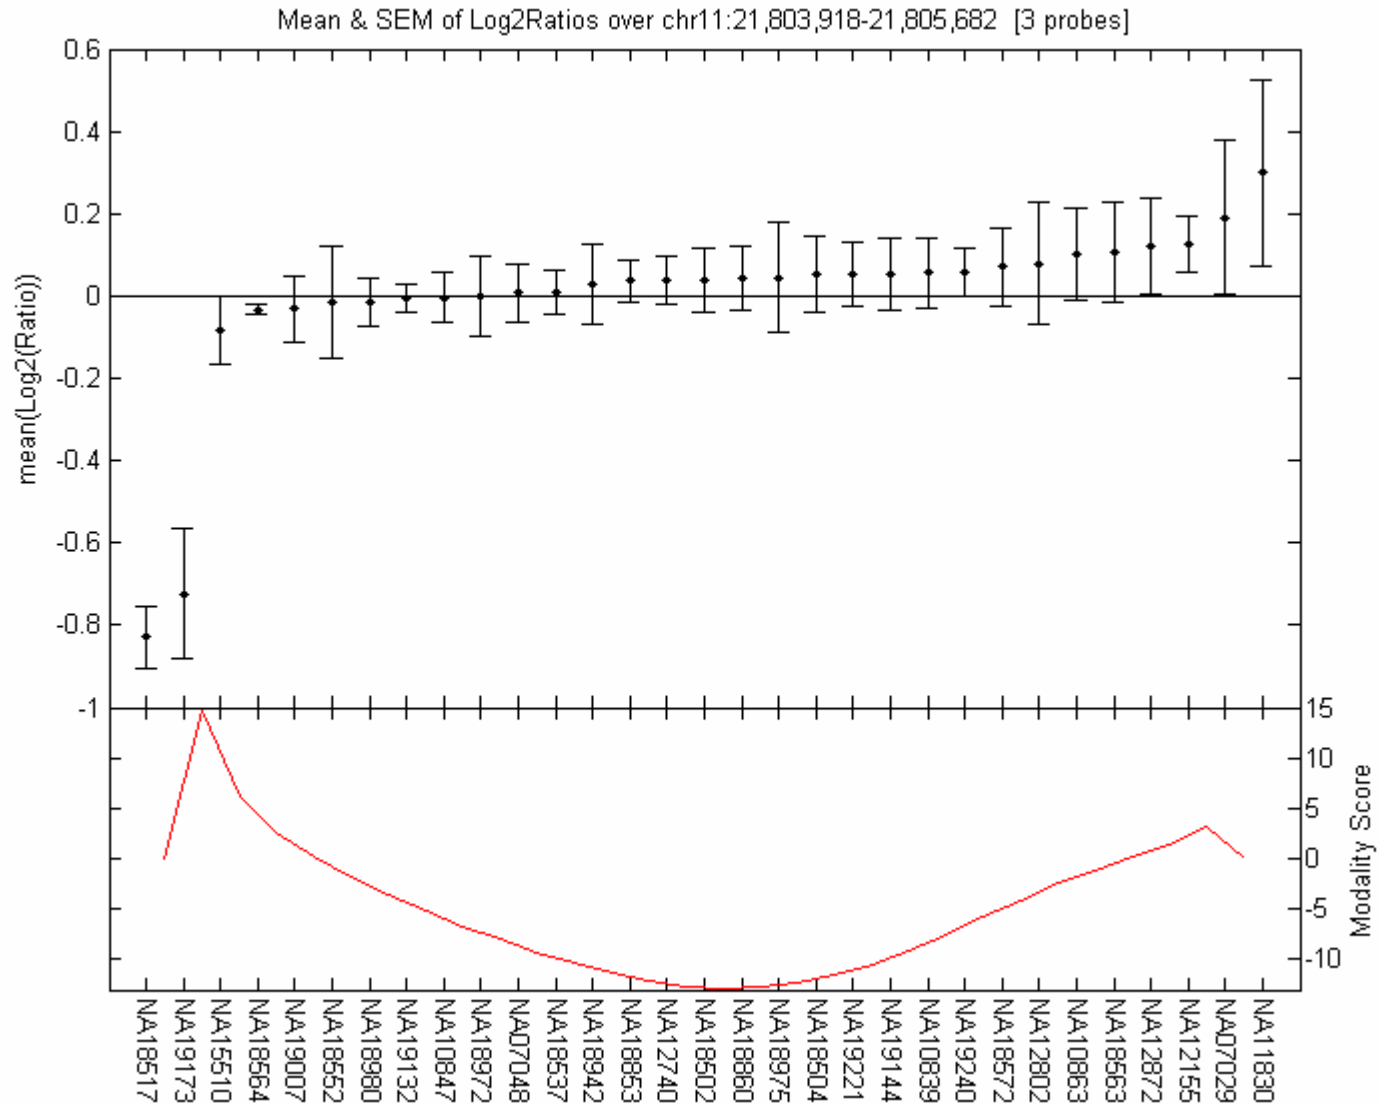

chr11:25,659,149-25,670,759 Score=20.9424

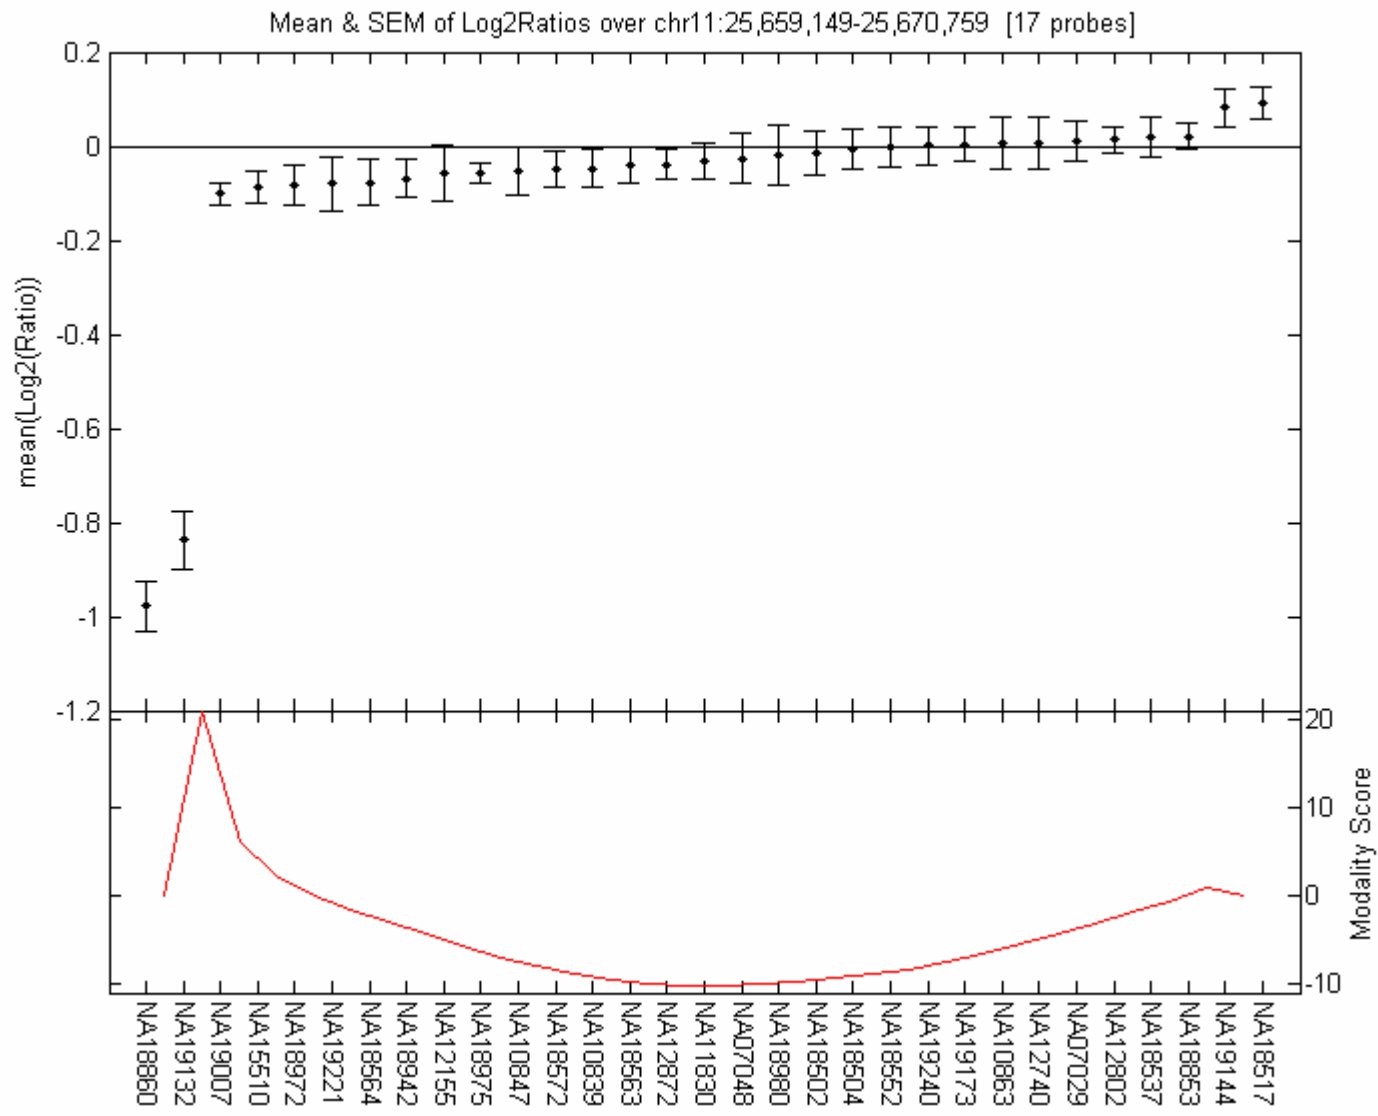

chr11:30,129,364-30,133,432 Score=19.3154

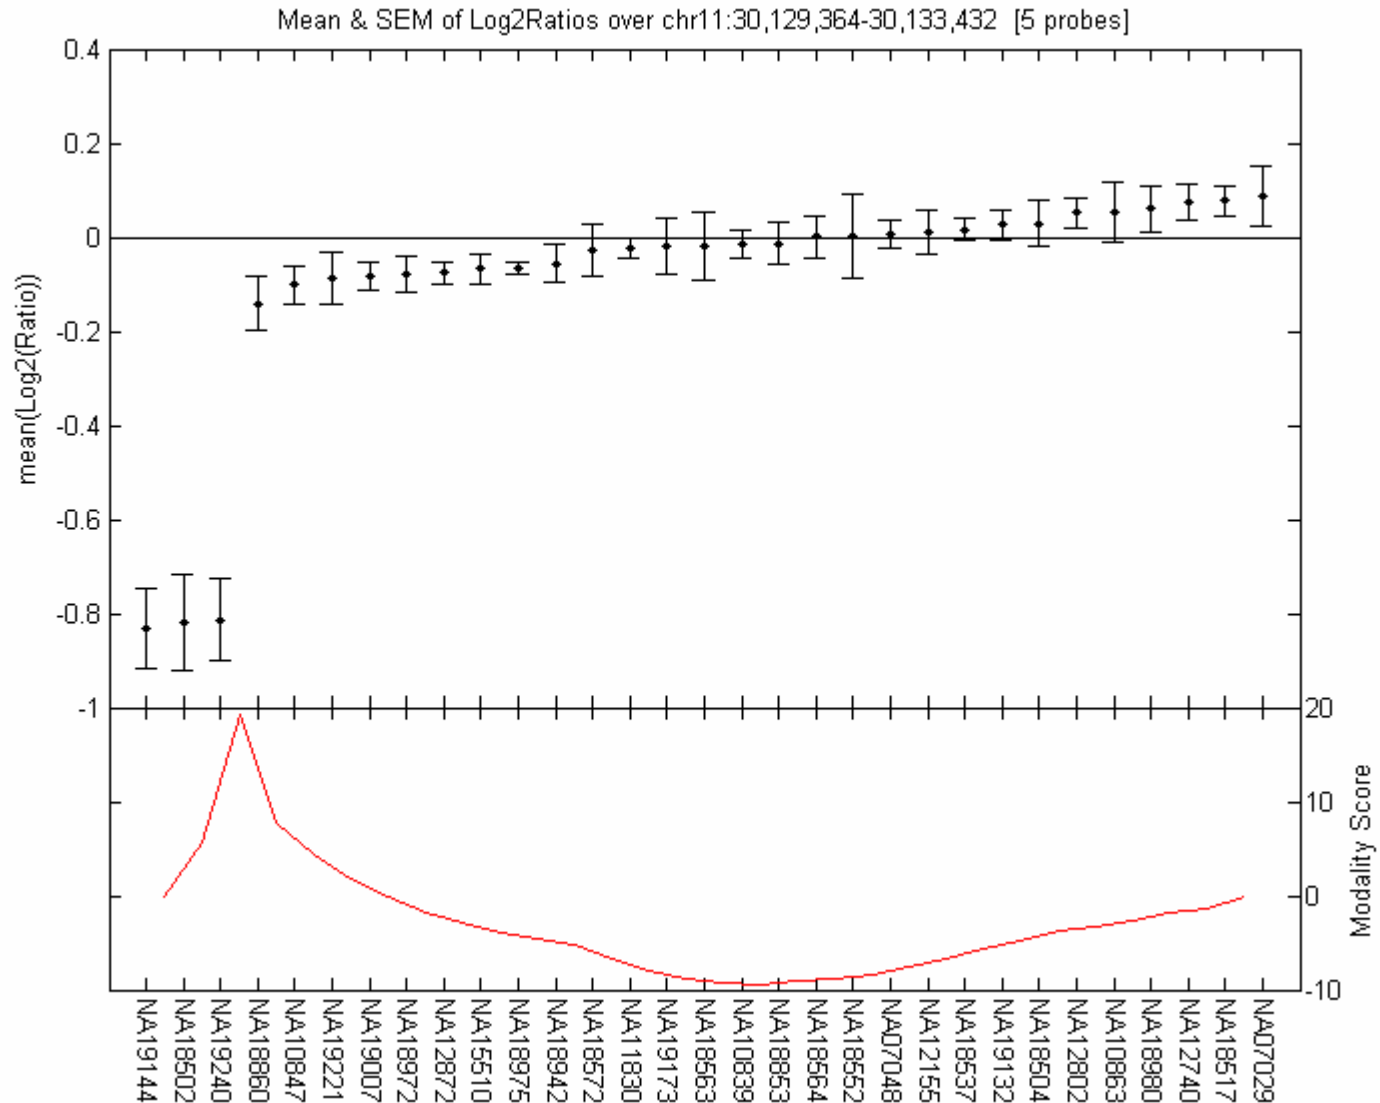



chr11:58,566,228-58,610,975 Score=13.6792

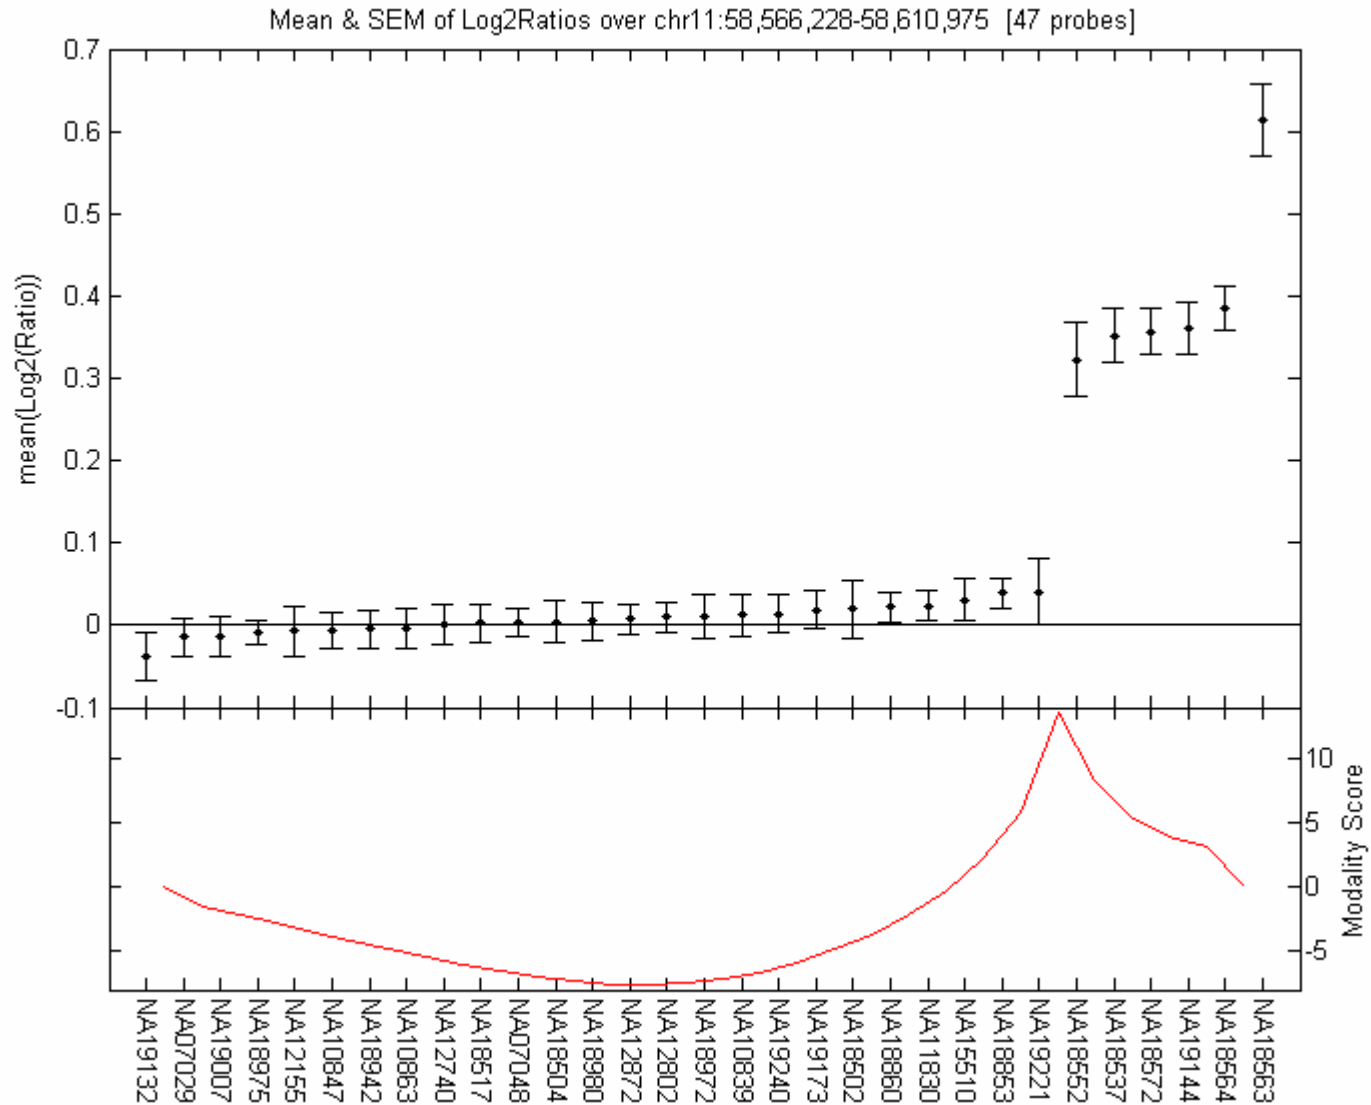

chr11:85,982,254-85,983,791 Score=10.8502

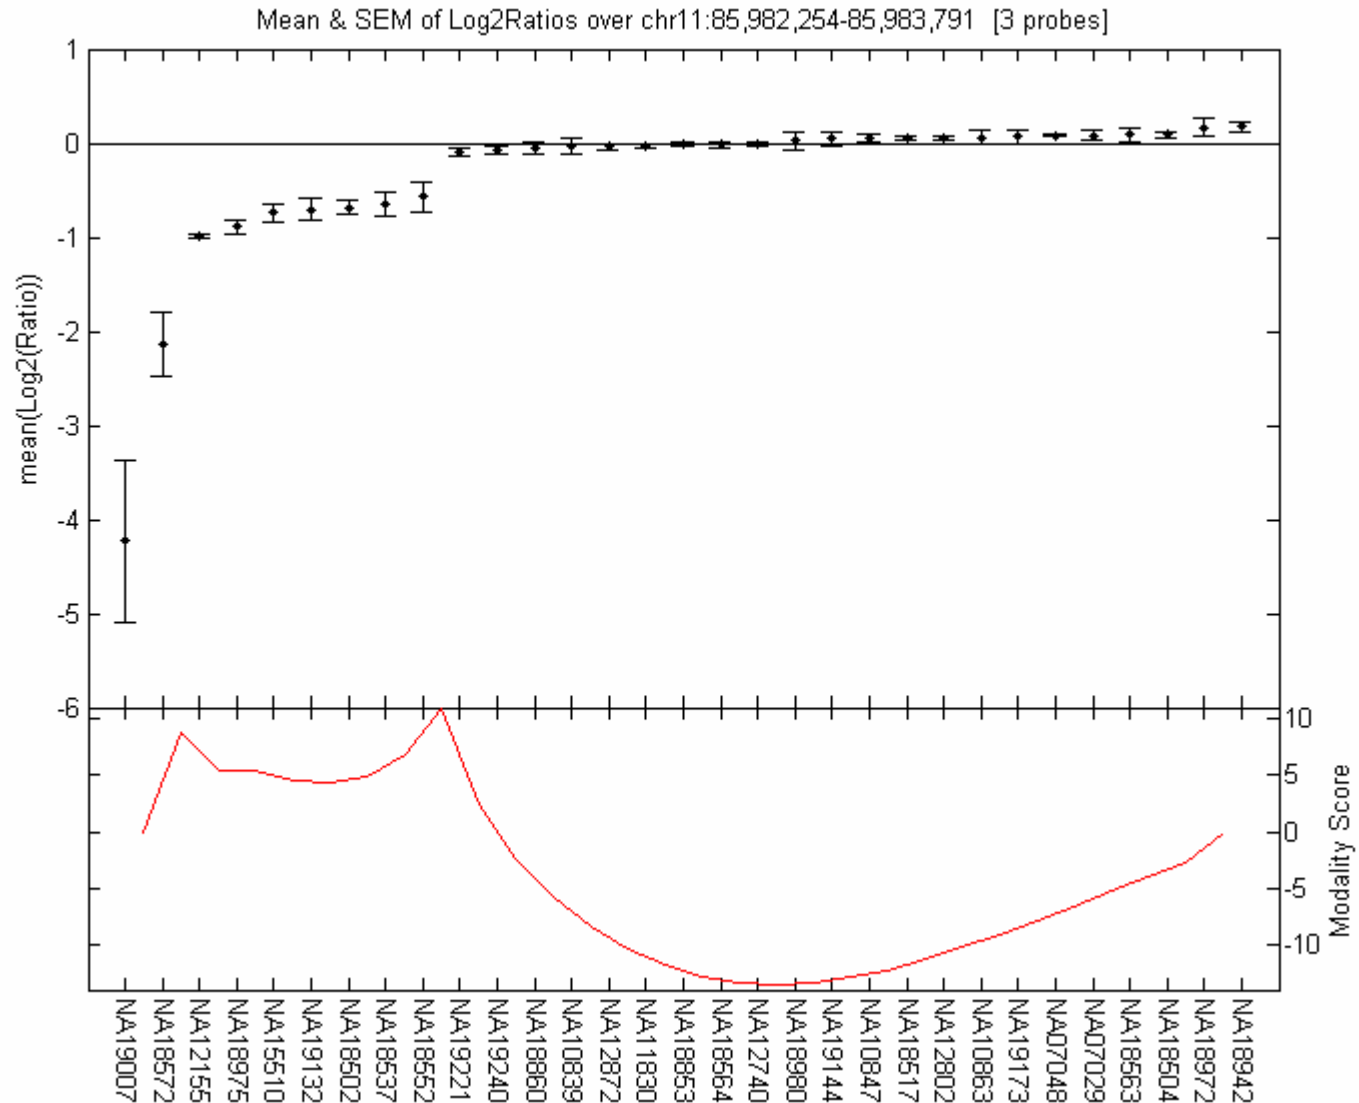

chr11:93,324,402-93,328,208 Score=17.0952

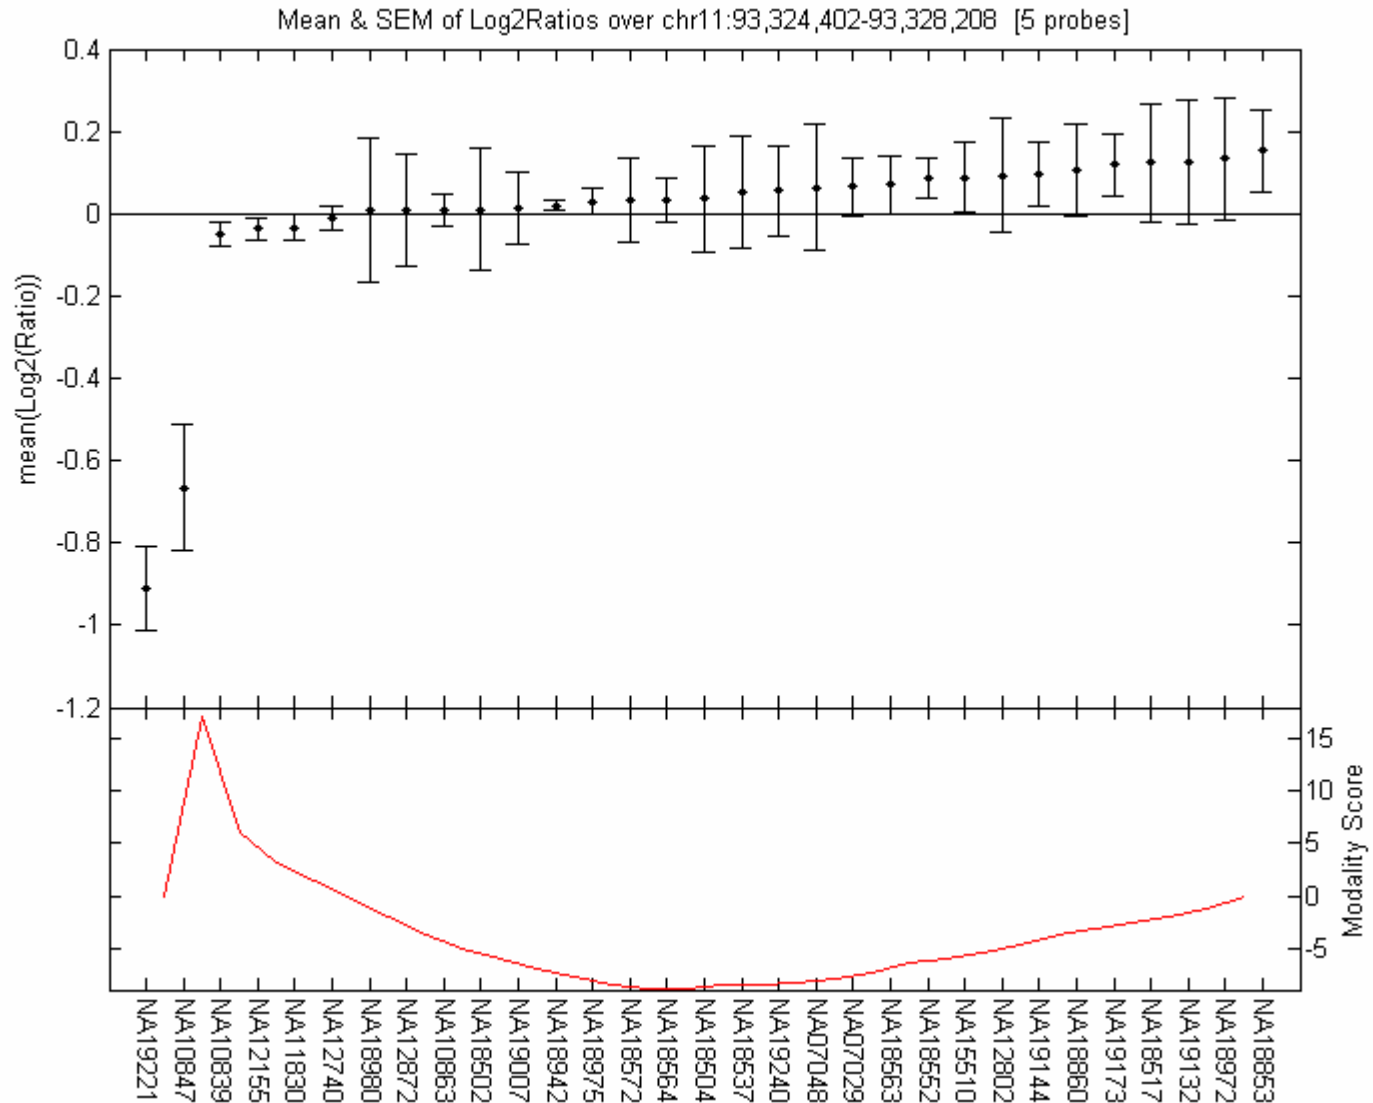

chr11:93,334,923-93,341,681 Score=24.2374

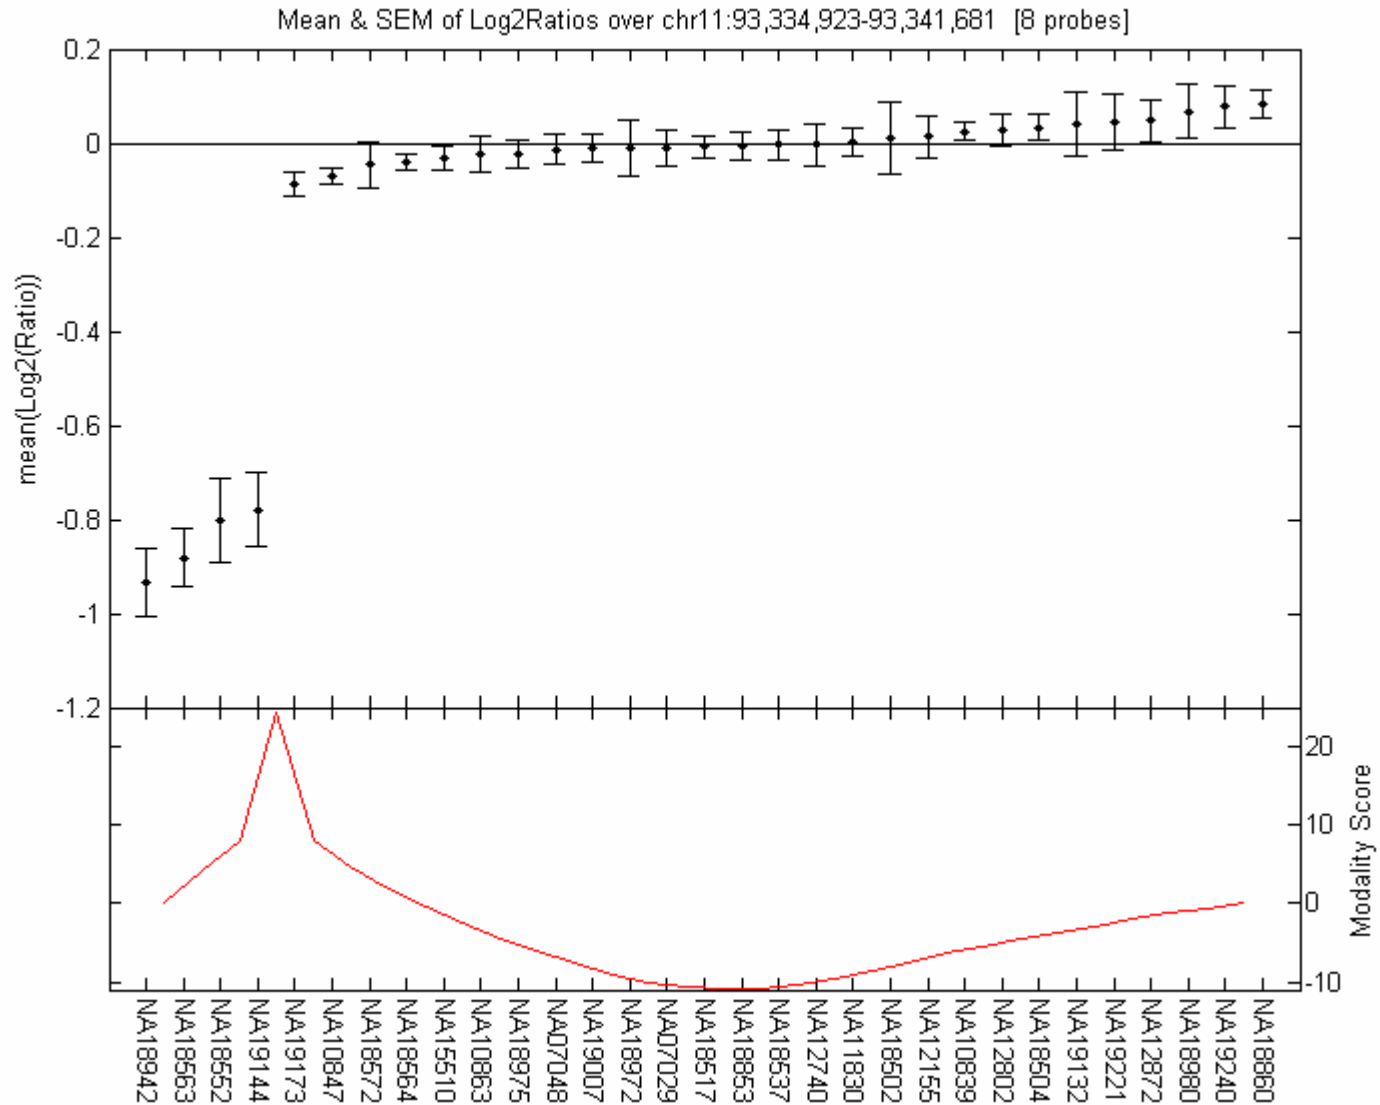

chr11:104,430,223-104,436,554 Score=20.7662

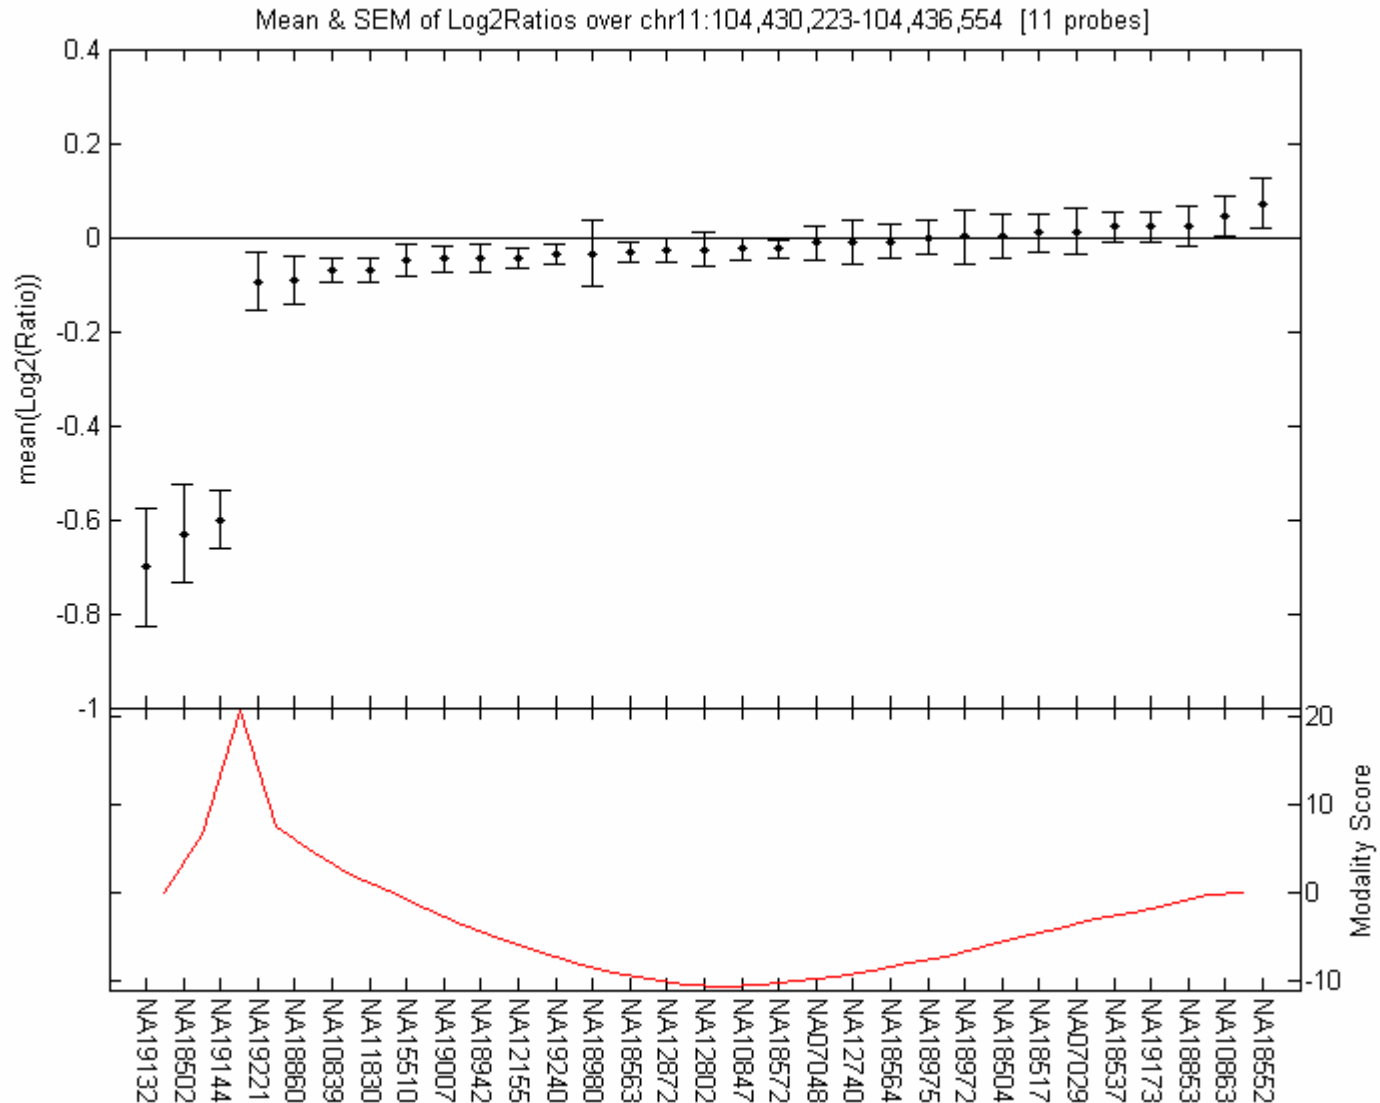

chr12:737,064-744,211 Score=19.8323

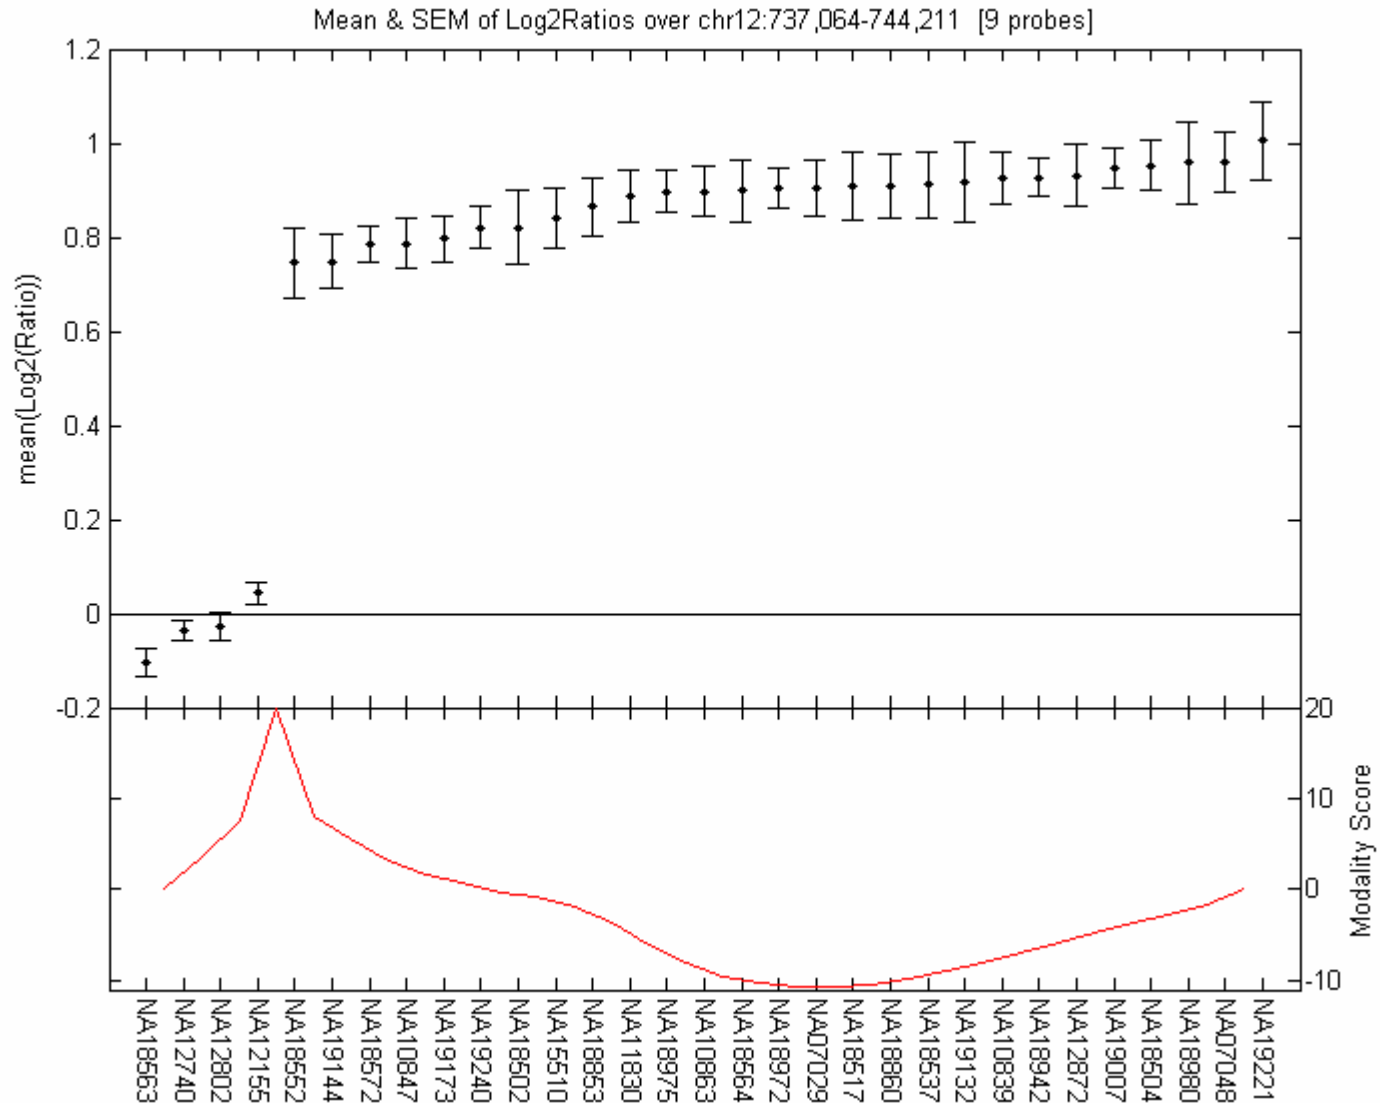

chr12:27,539,695-27,545,179 Score=21.6139

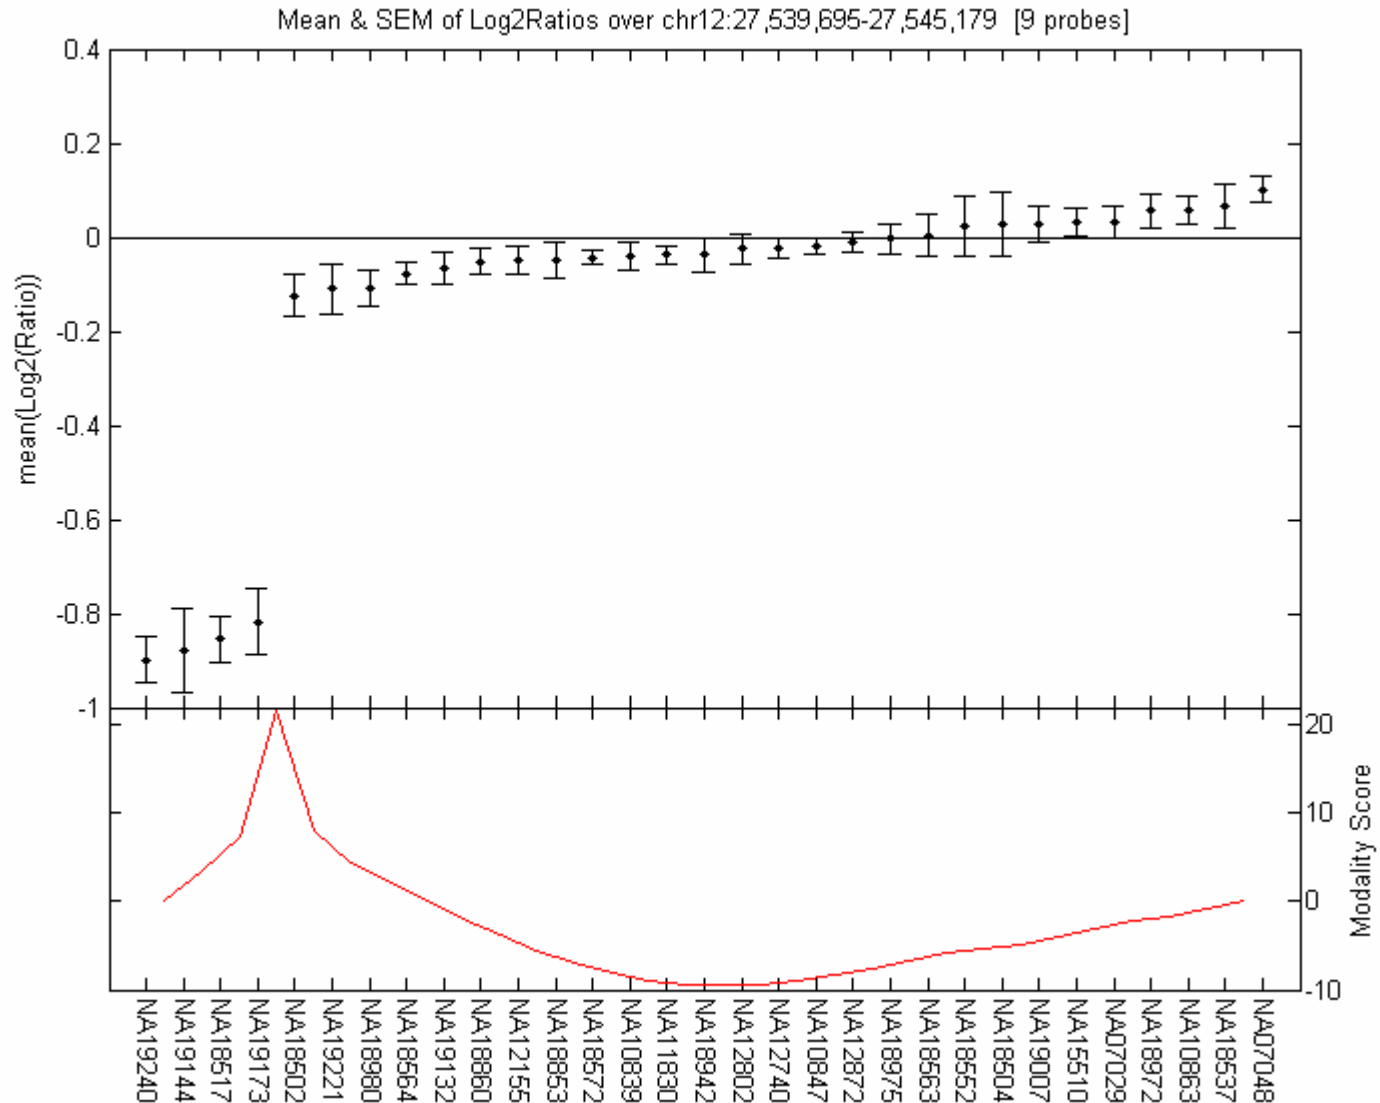

chr12:30,129,041-30,132,177 Score=15.7453

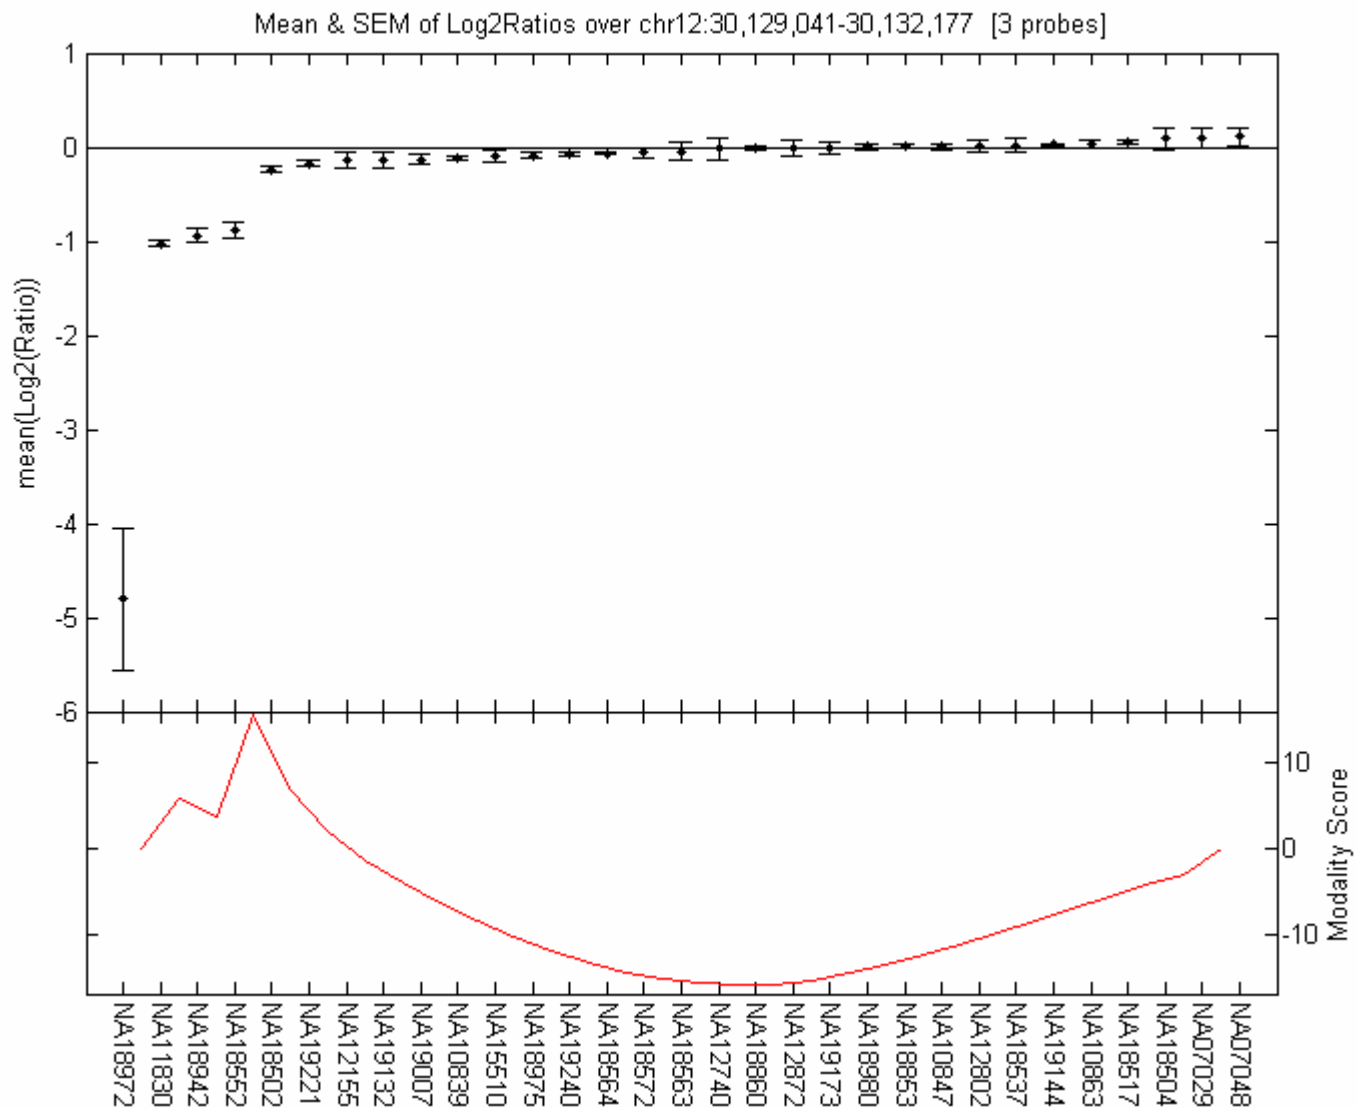



chr12:33,192,576-33,198,516 Score=16.169

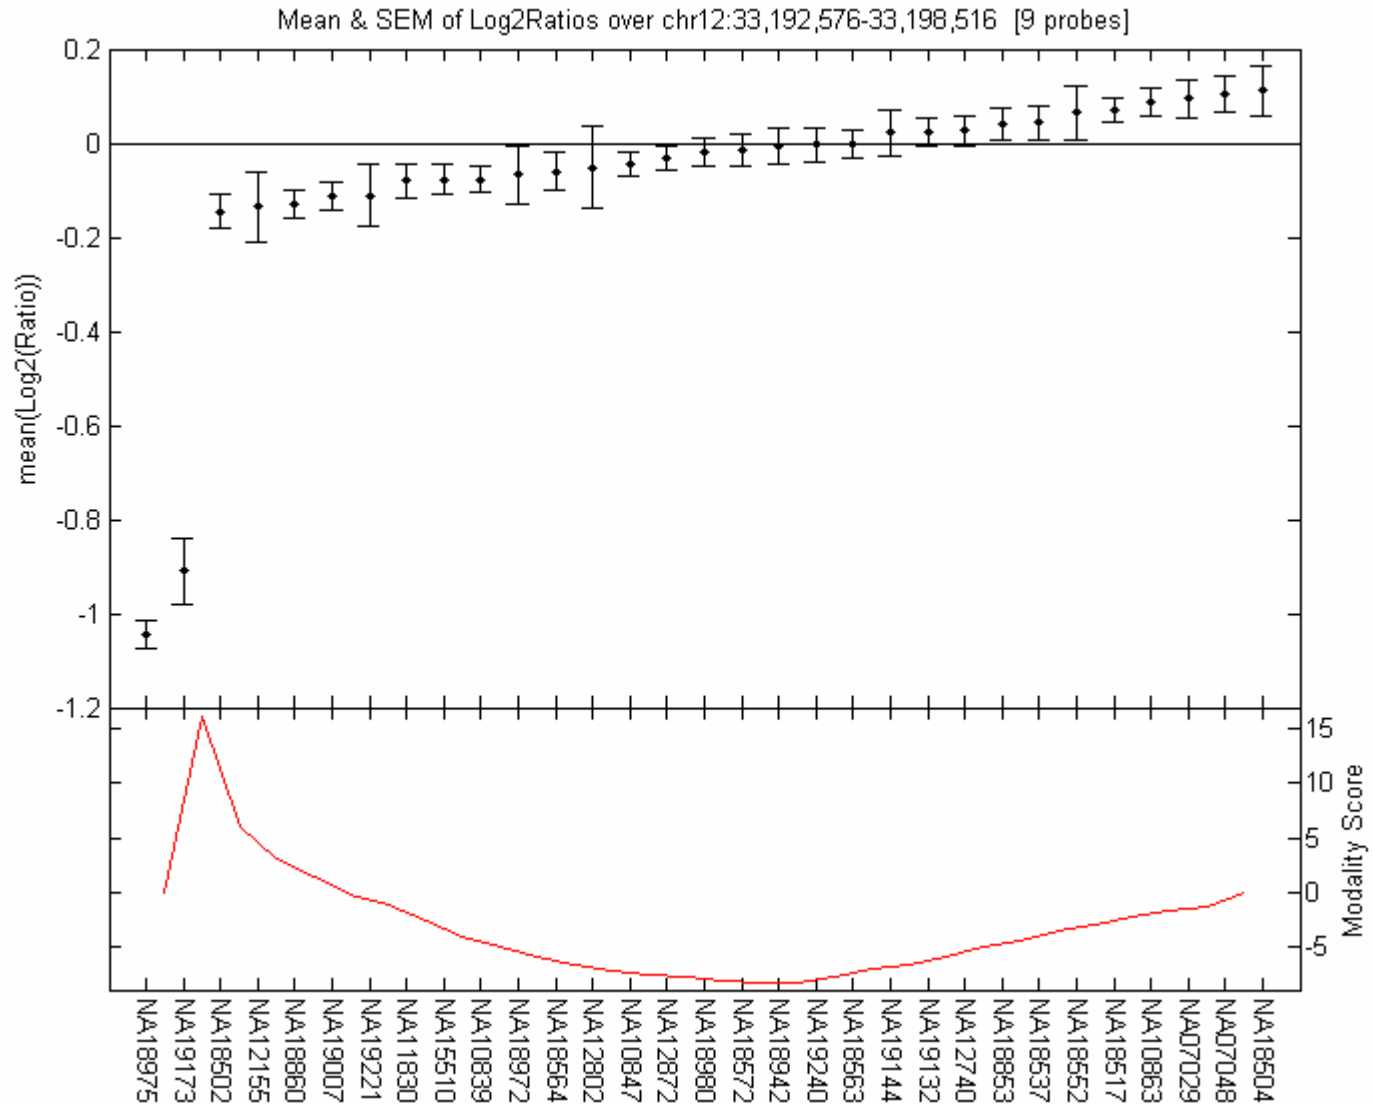

chr12:34,099,639-34,107,972 Score=21.0907

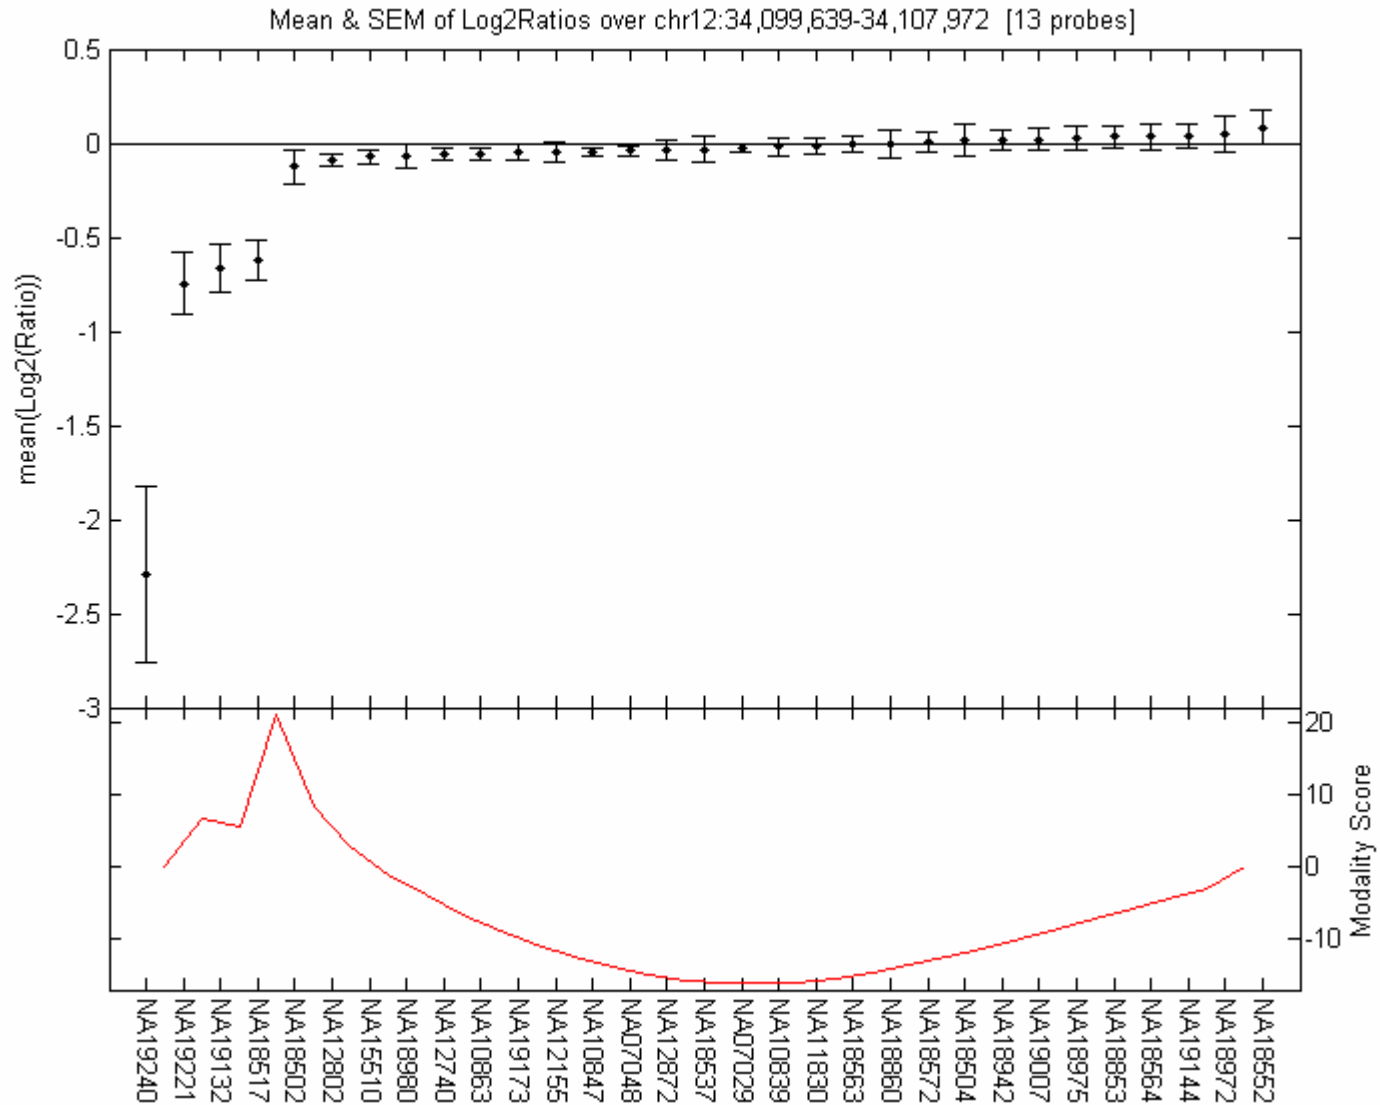

chr12:59,039,839-59,044,045 Score=13.8051

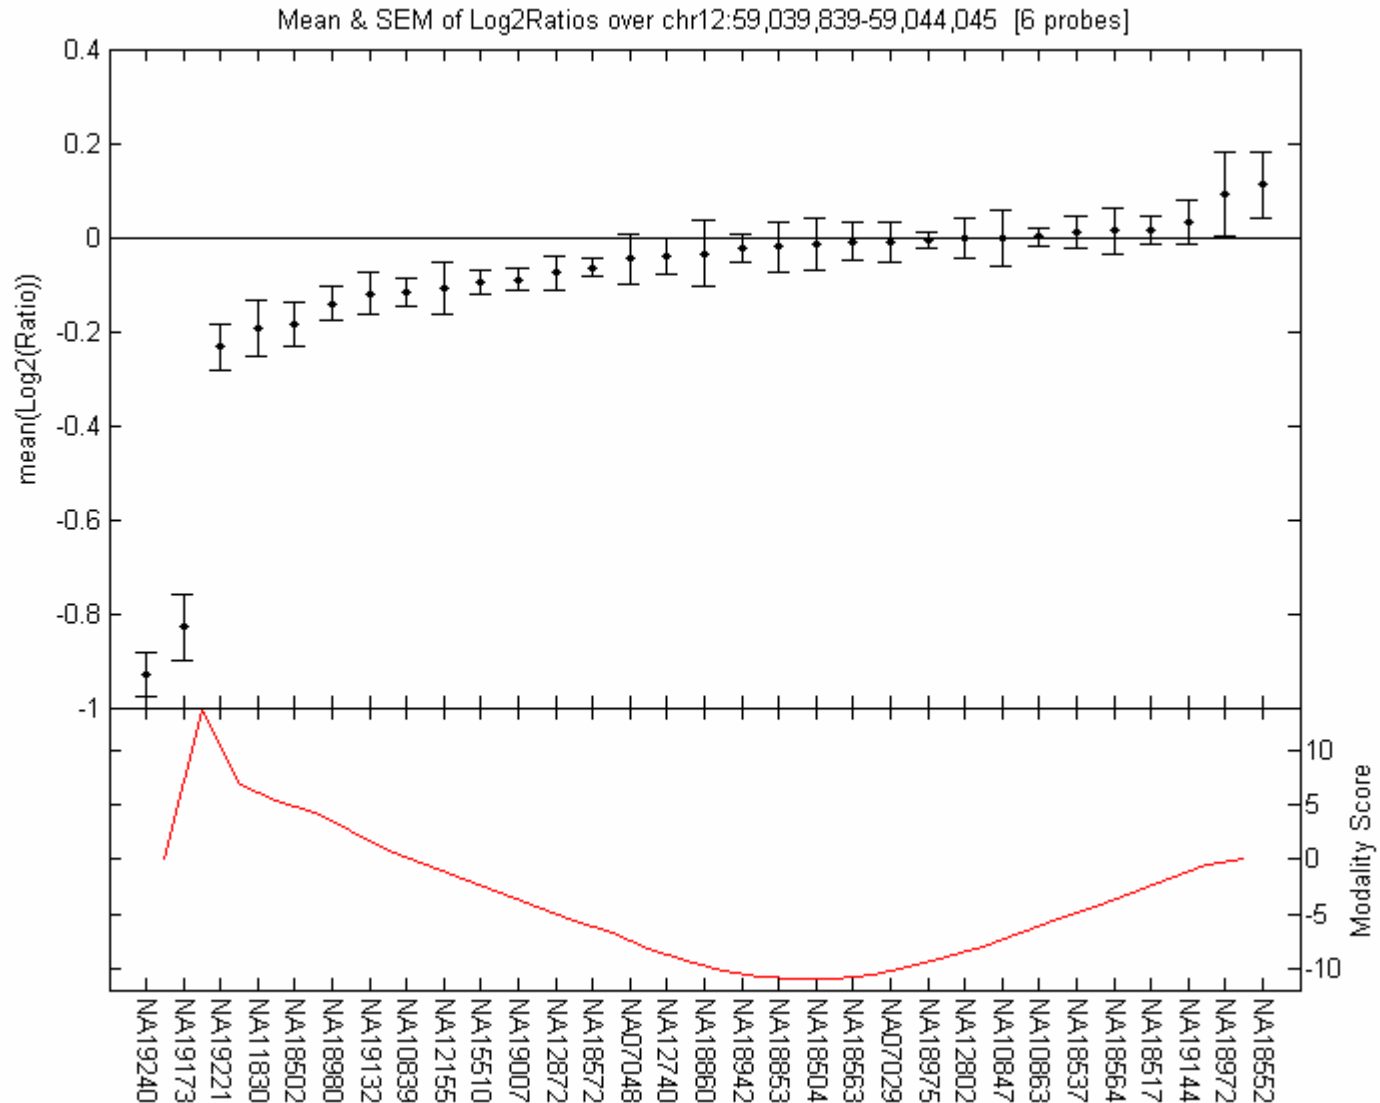

chr12:98,296,506-98,298,530 Score=29.8358

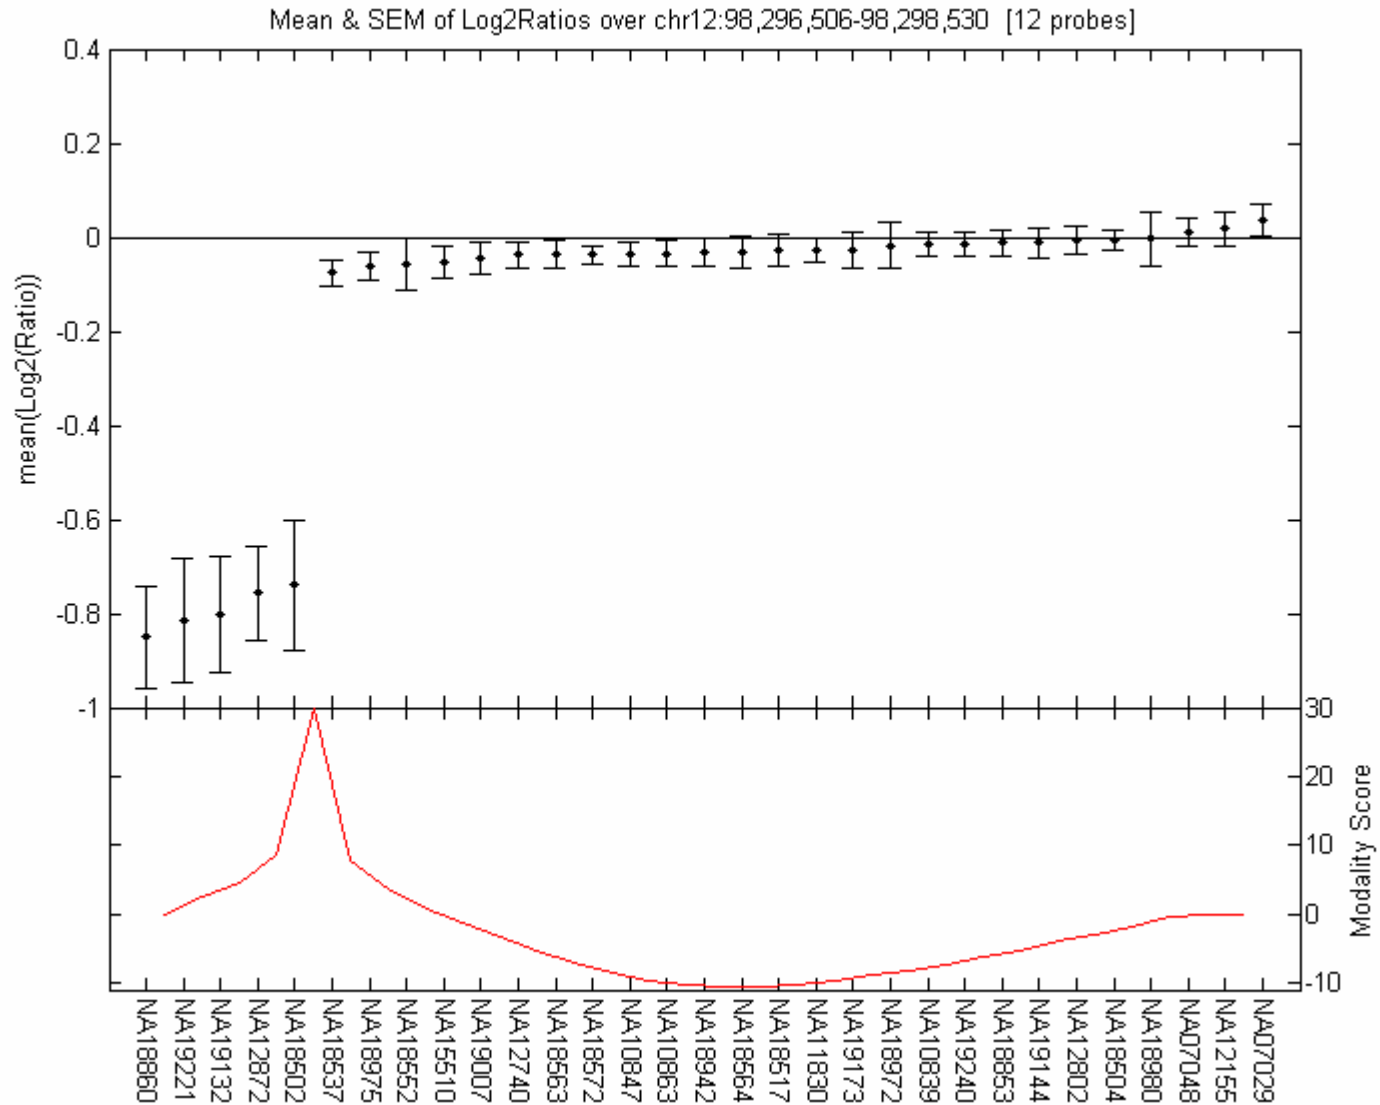

chr12:130,799,187-130,801,345 Score=11.1446

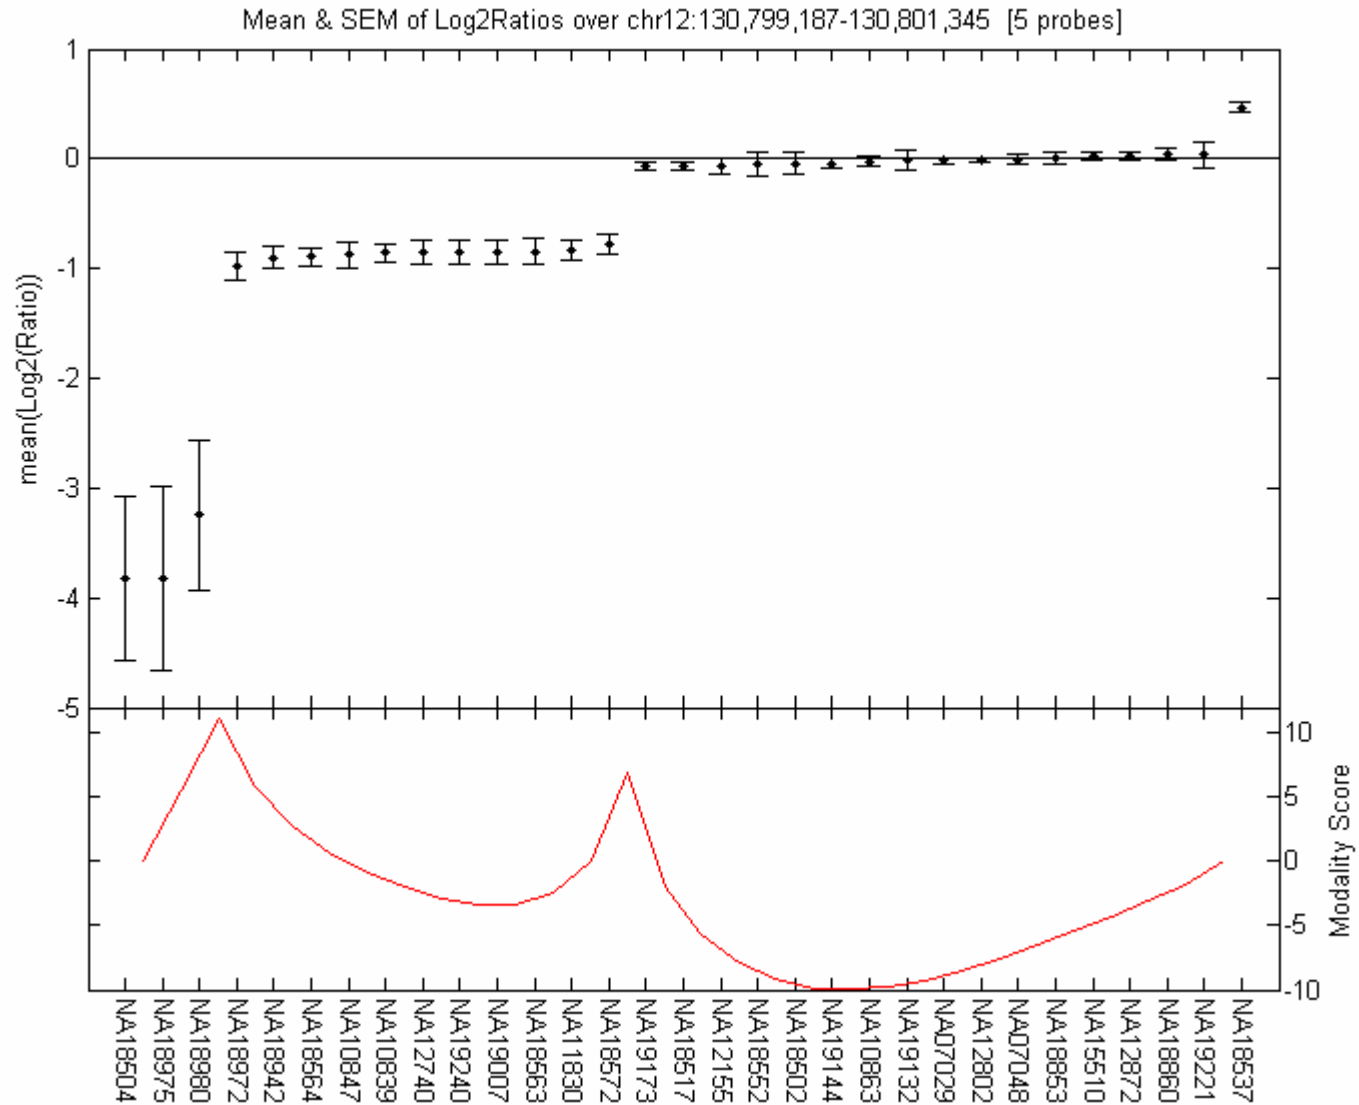

chr12:132,249,203-132,249,666 Score=13.4697

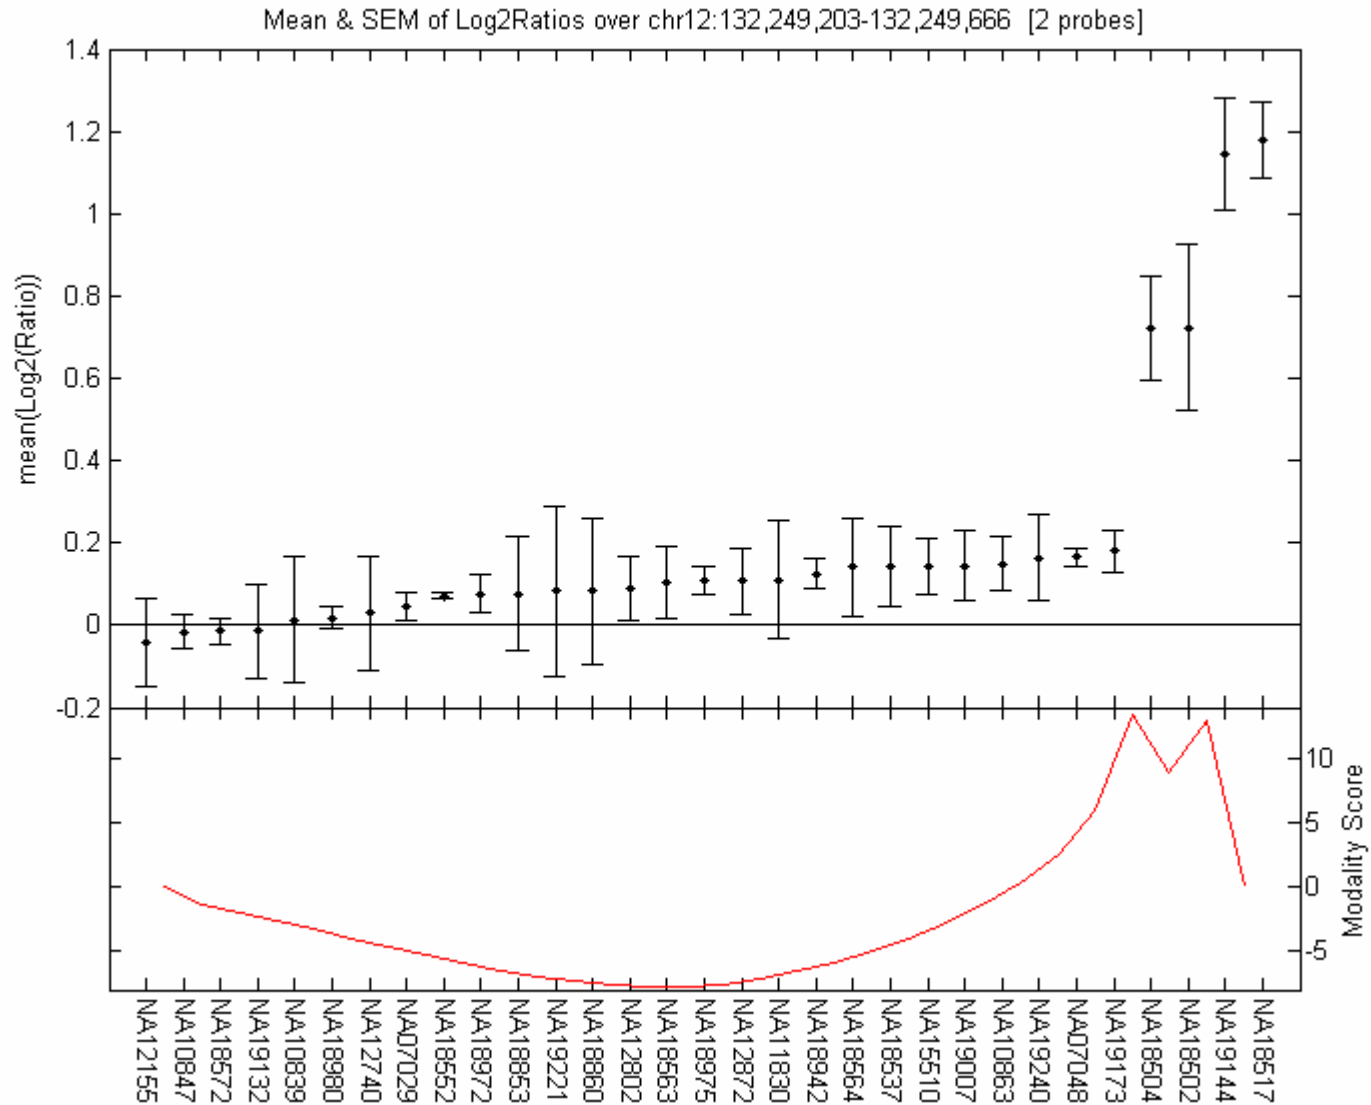

chr13:25,948,272-25,949,415 Score=11.2684

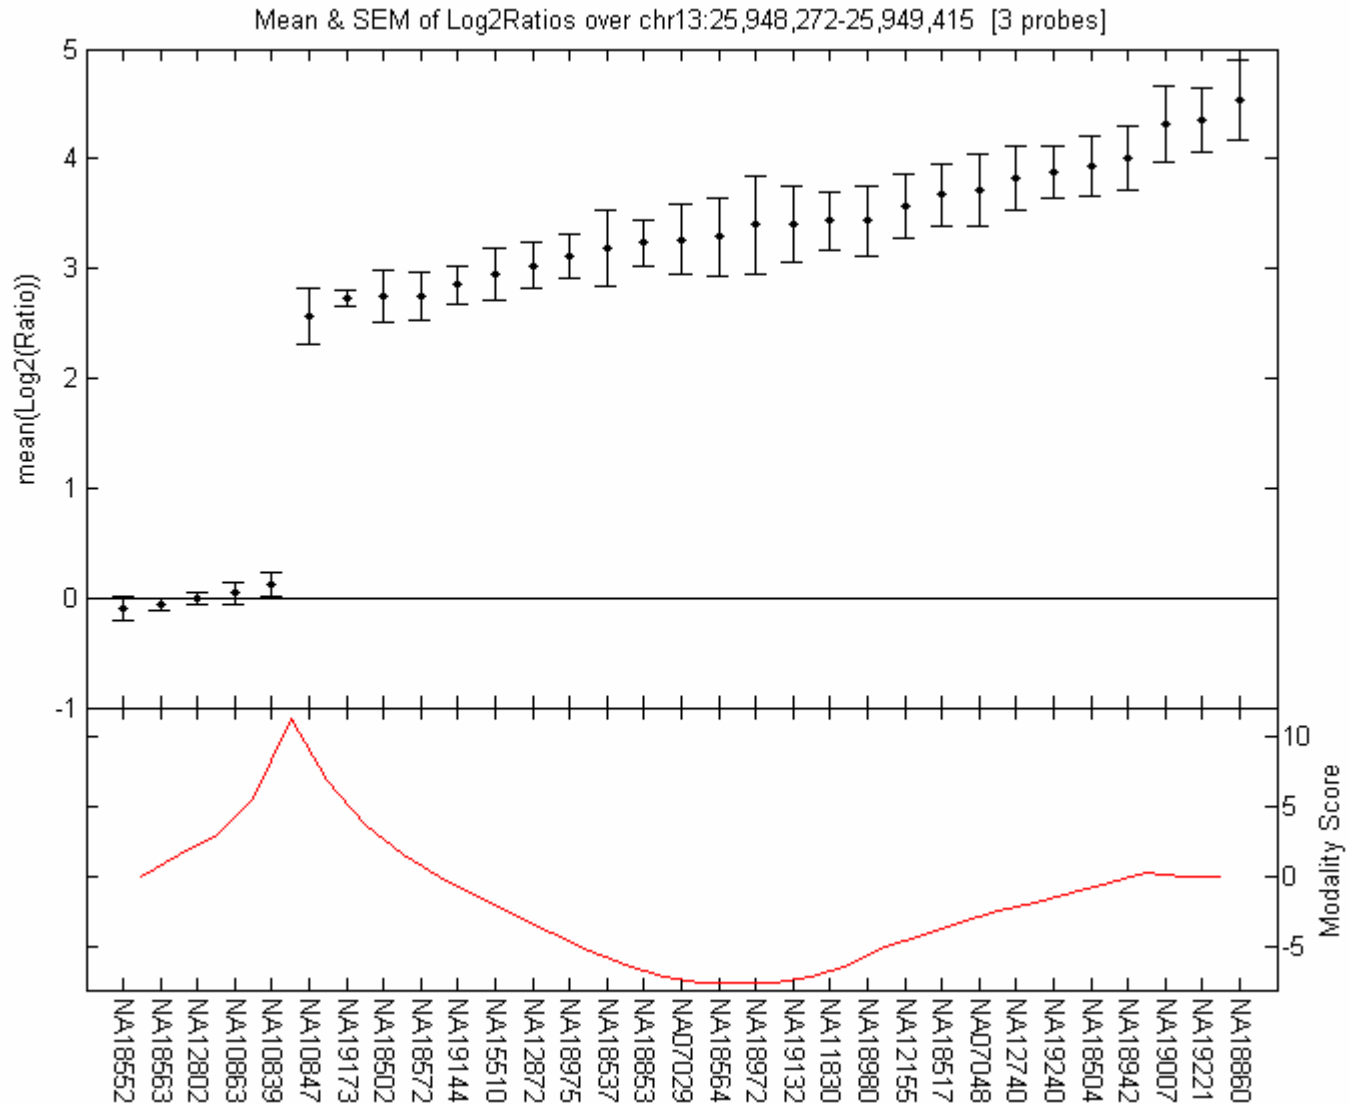

chr13:31,430,838-31,436,488 Score=16.2915

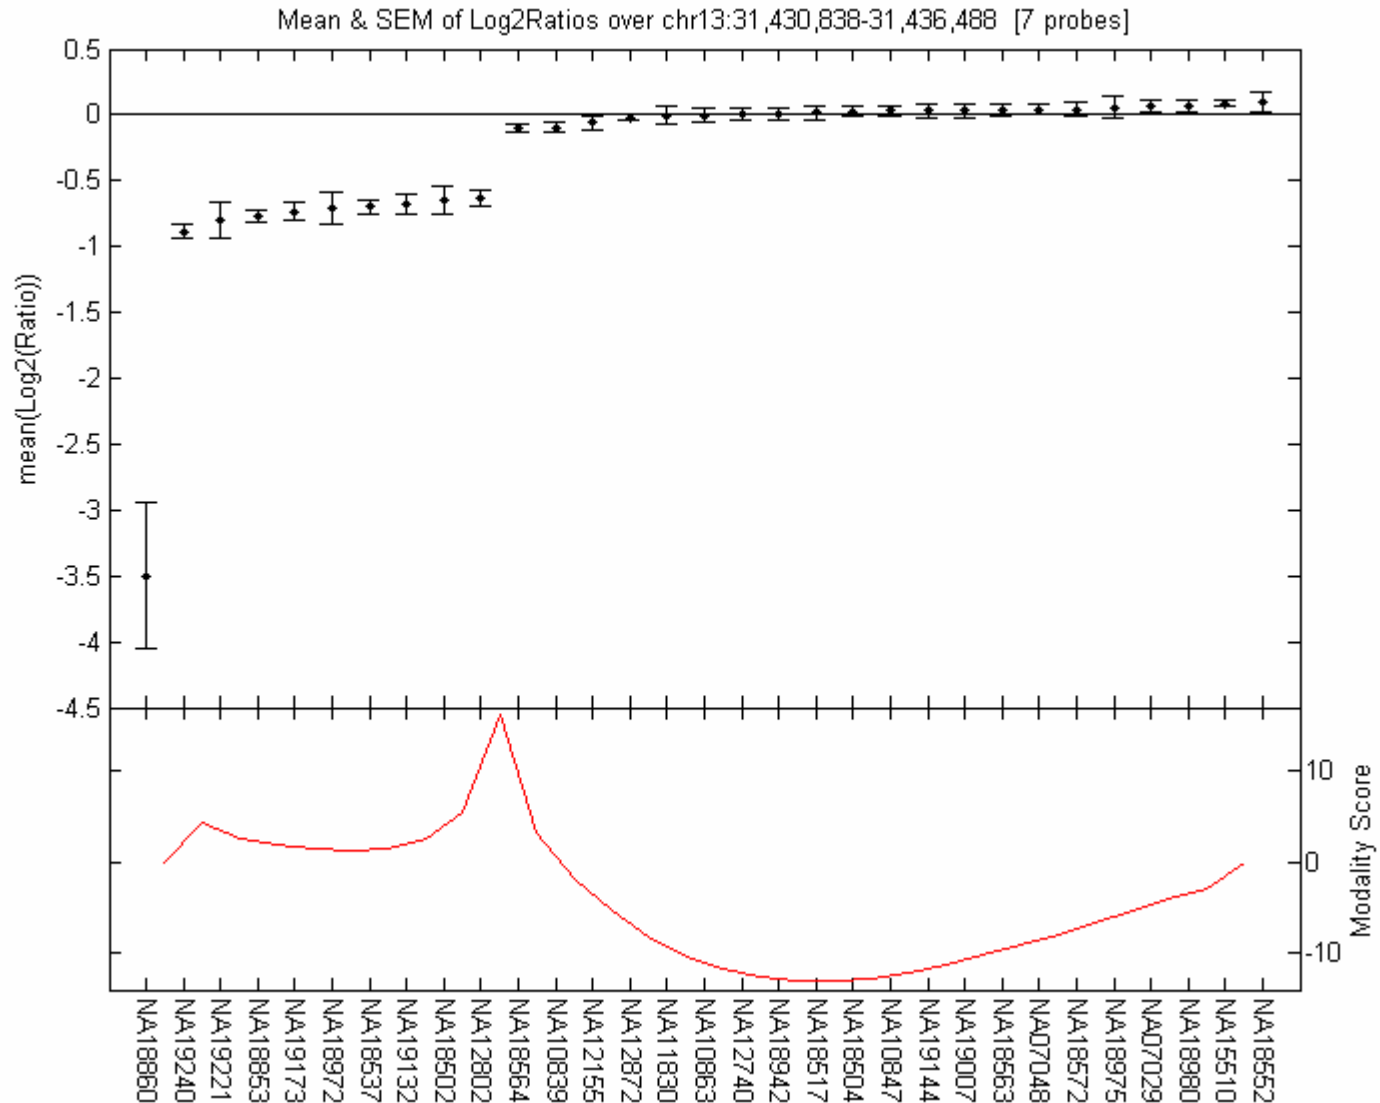



chr13:36,973,552-36,982,905 Score=12.8232

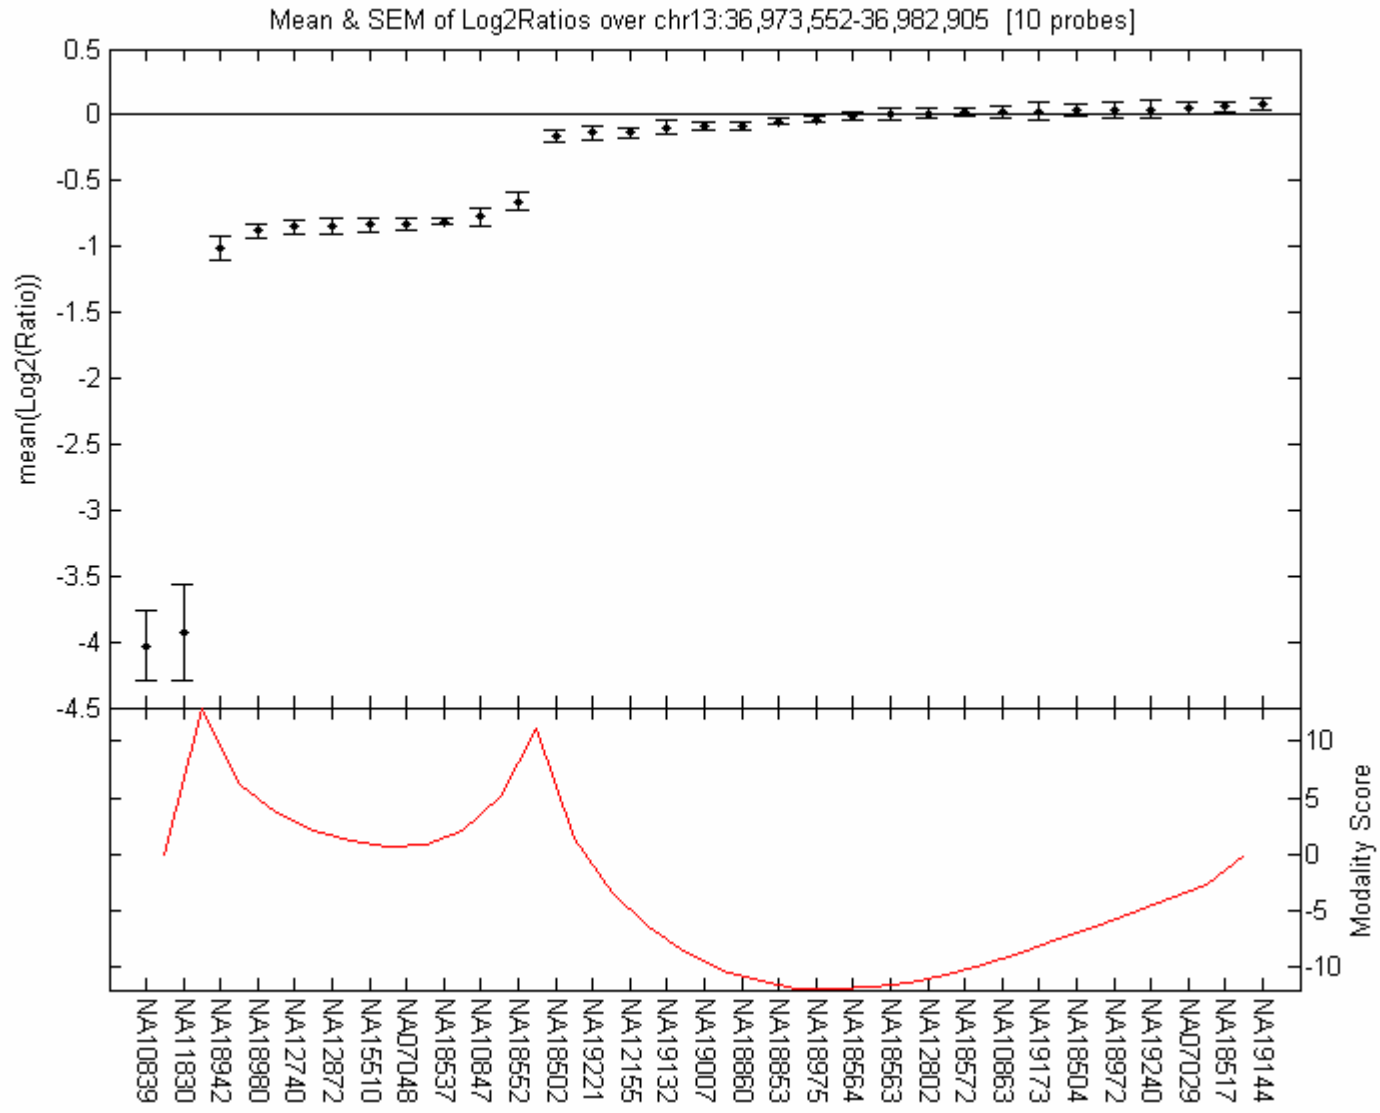

chr14:19,624,114-19,625,018 Score=13.7118

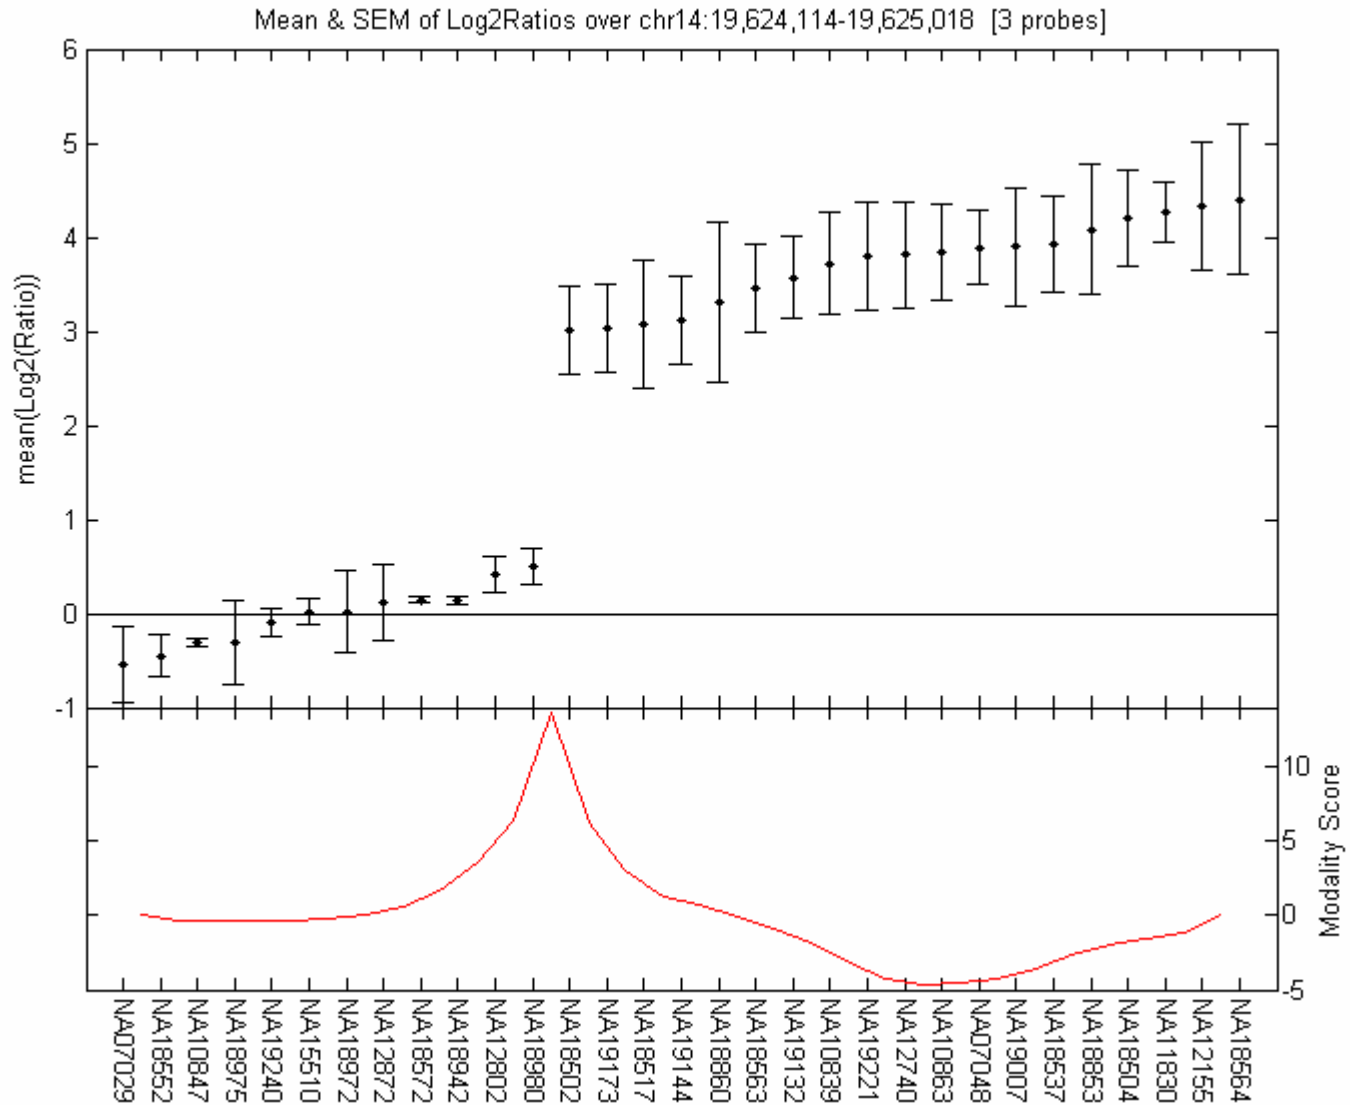

chr14:34,185,020-34,189,097 Score=23.3562

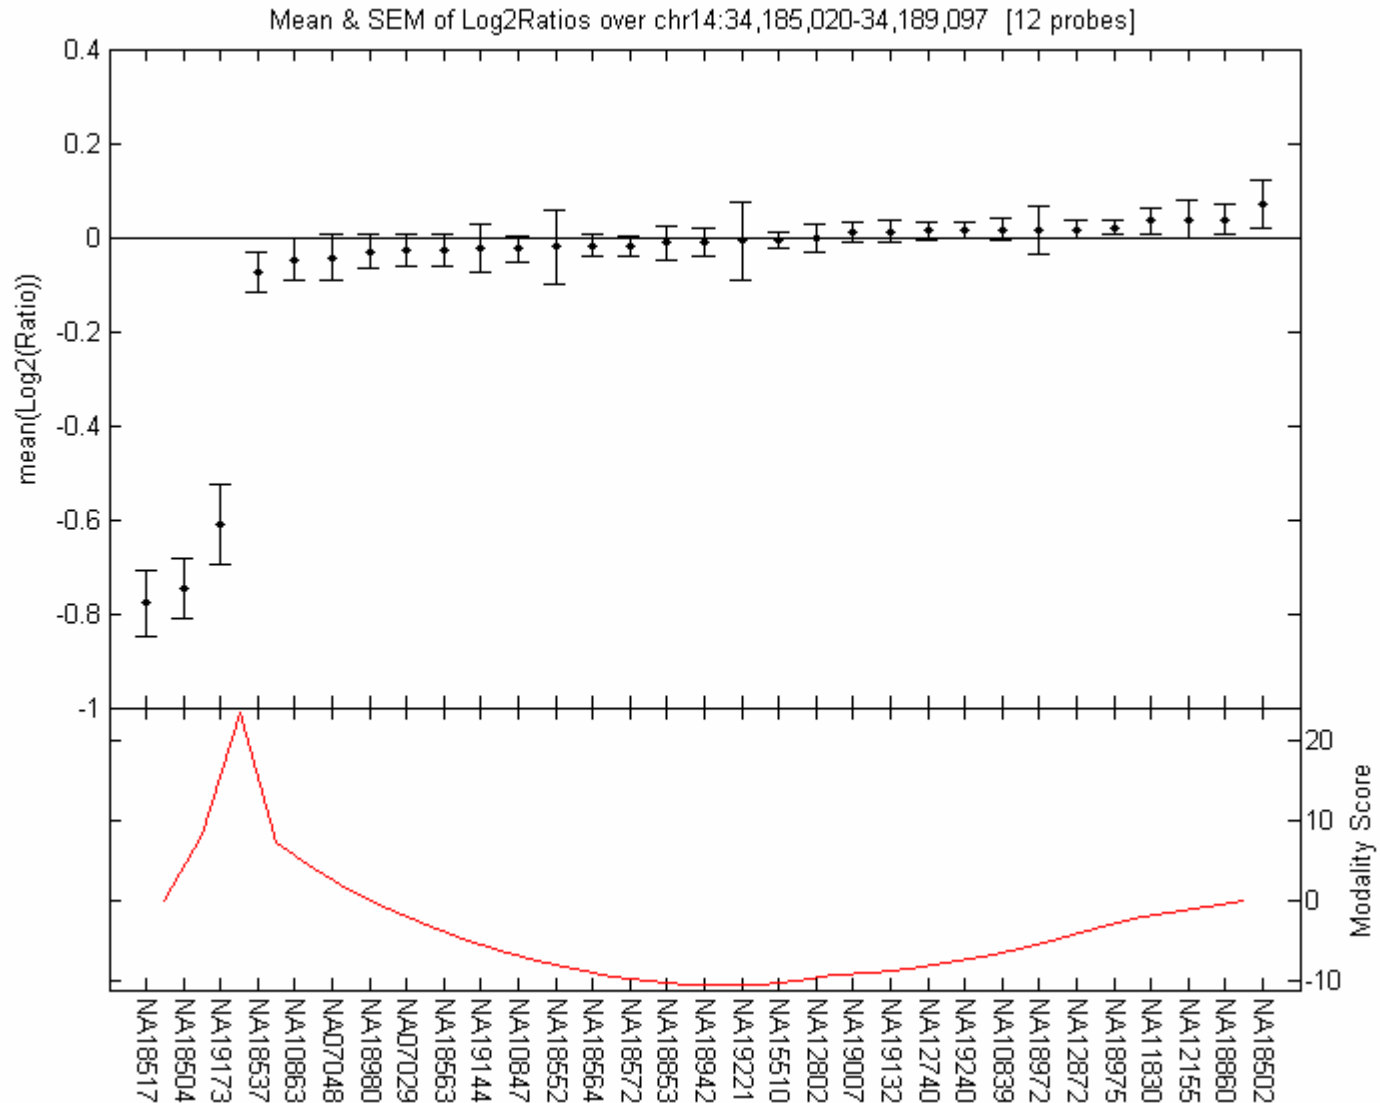

chr14:40,680,005-40,739,212 Score=24.4195

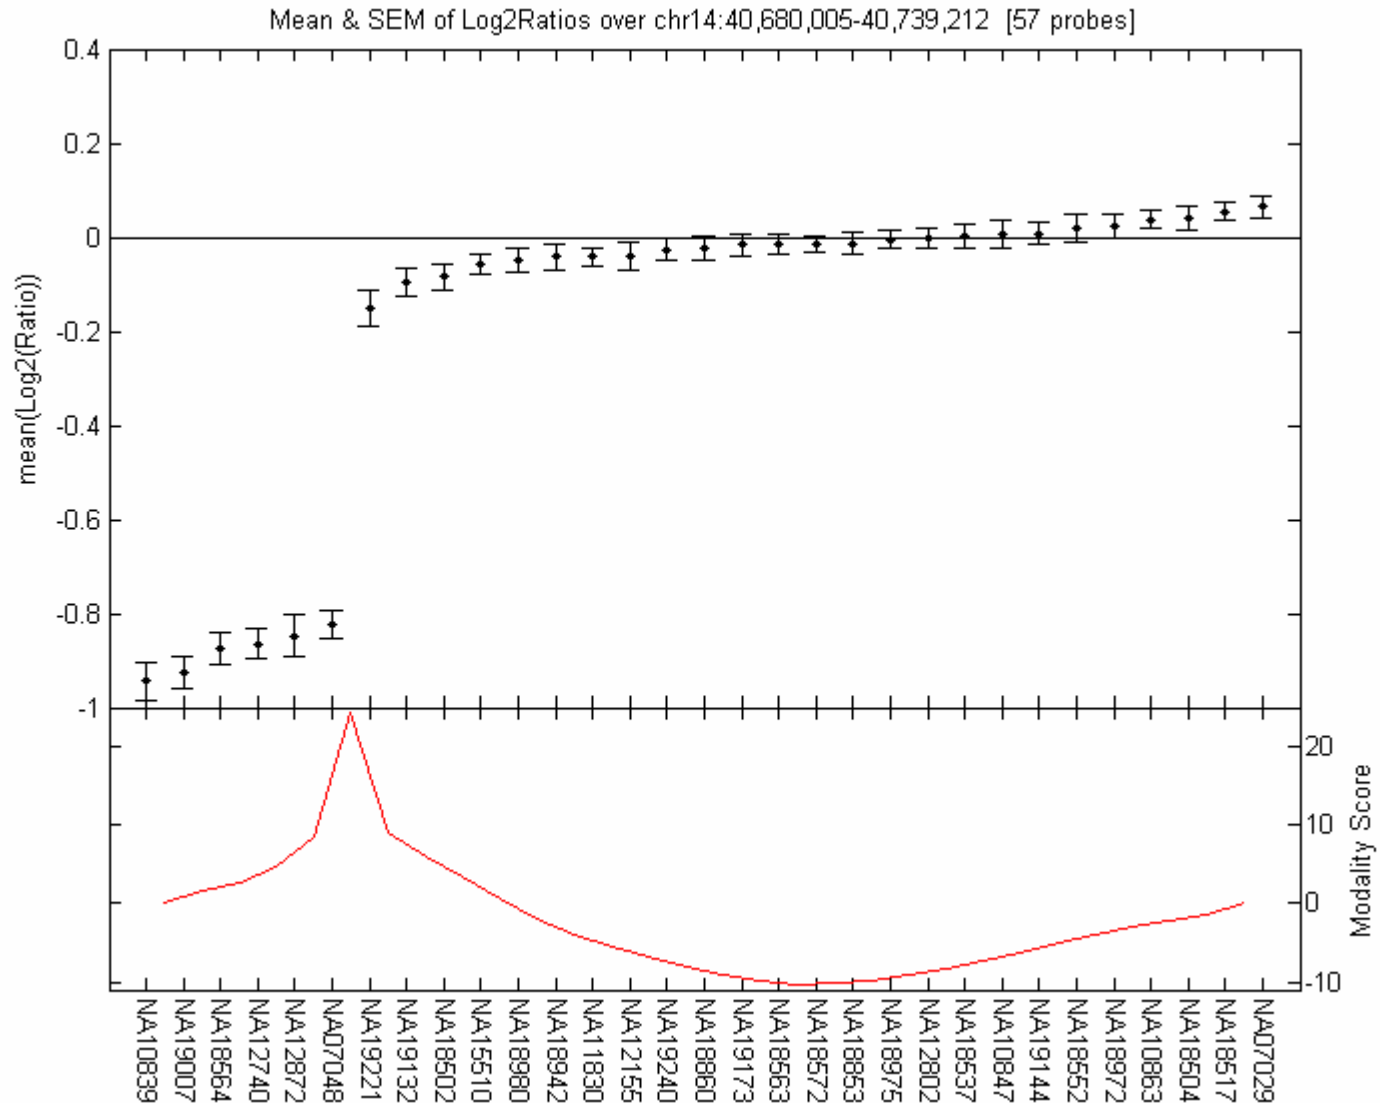

chr14:42,062,203-42,062,601 Score=16.6154

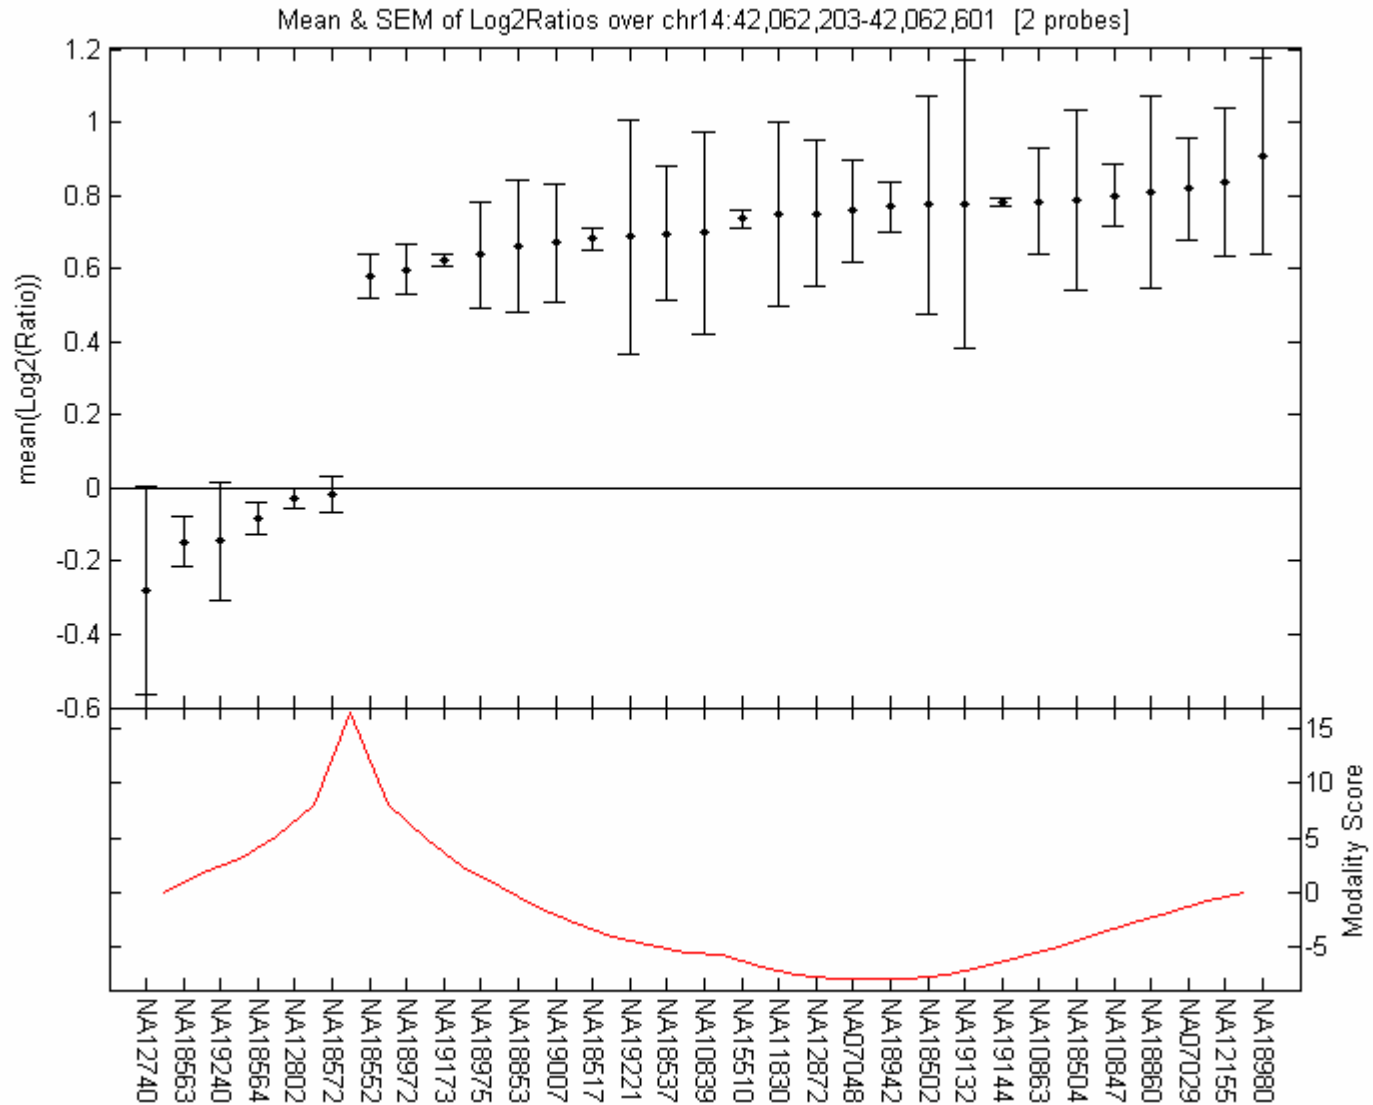

chr14:43,571,644-43,598,358 Score=12.7072

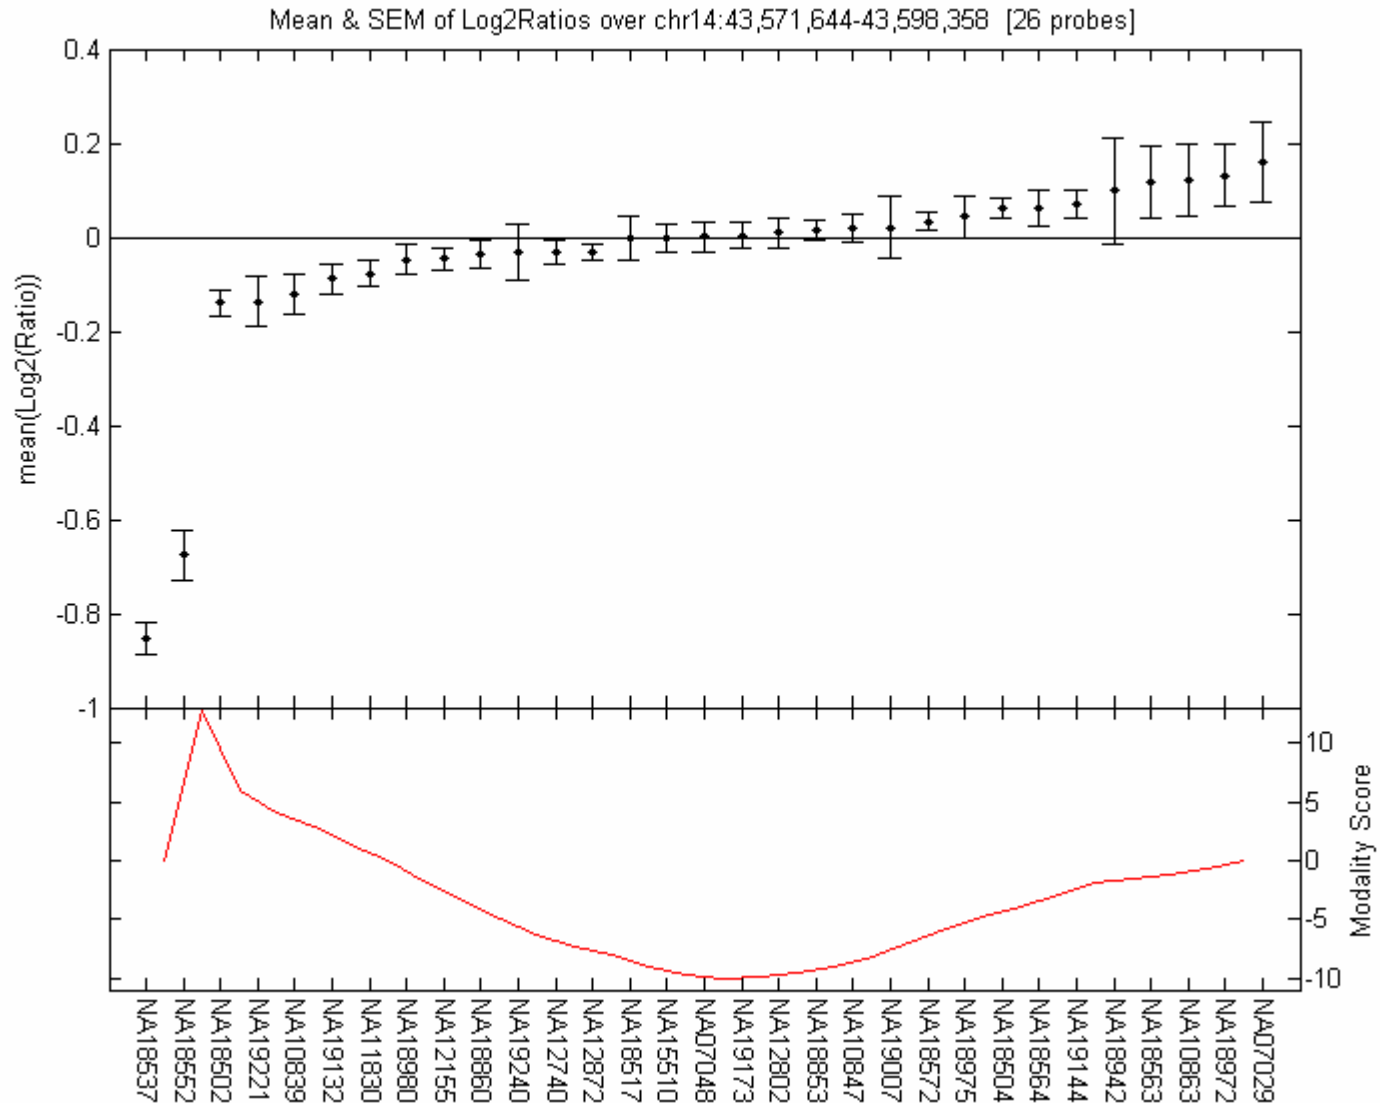

chr14:53,780,274-53,783,238 Score=25.3504

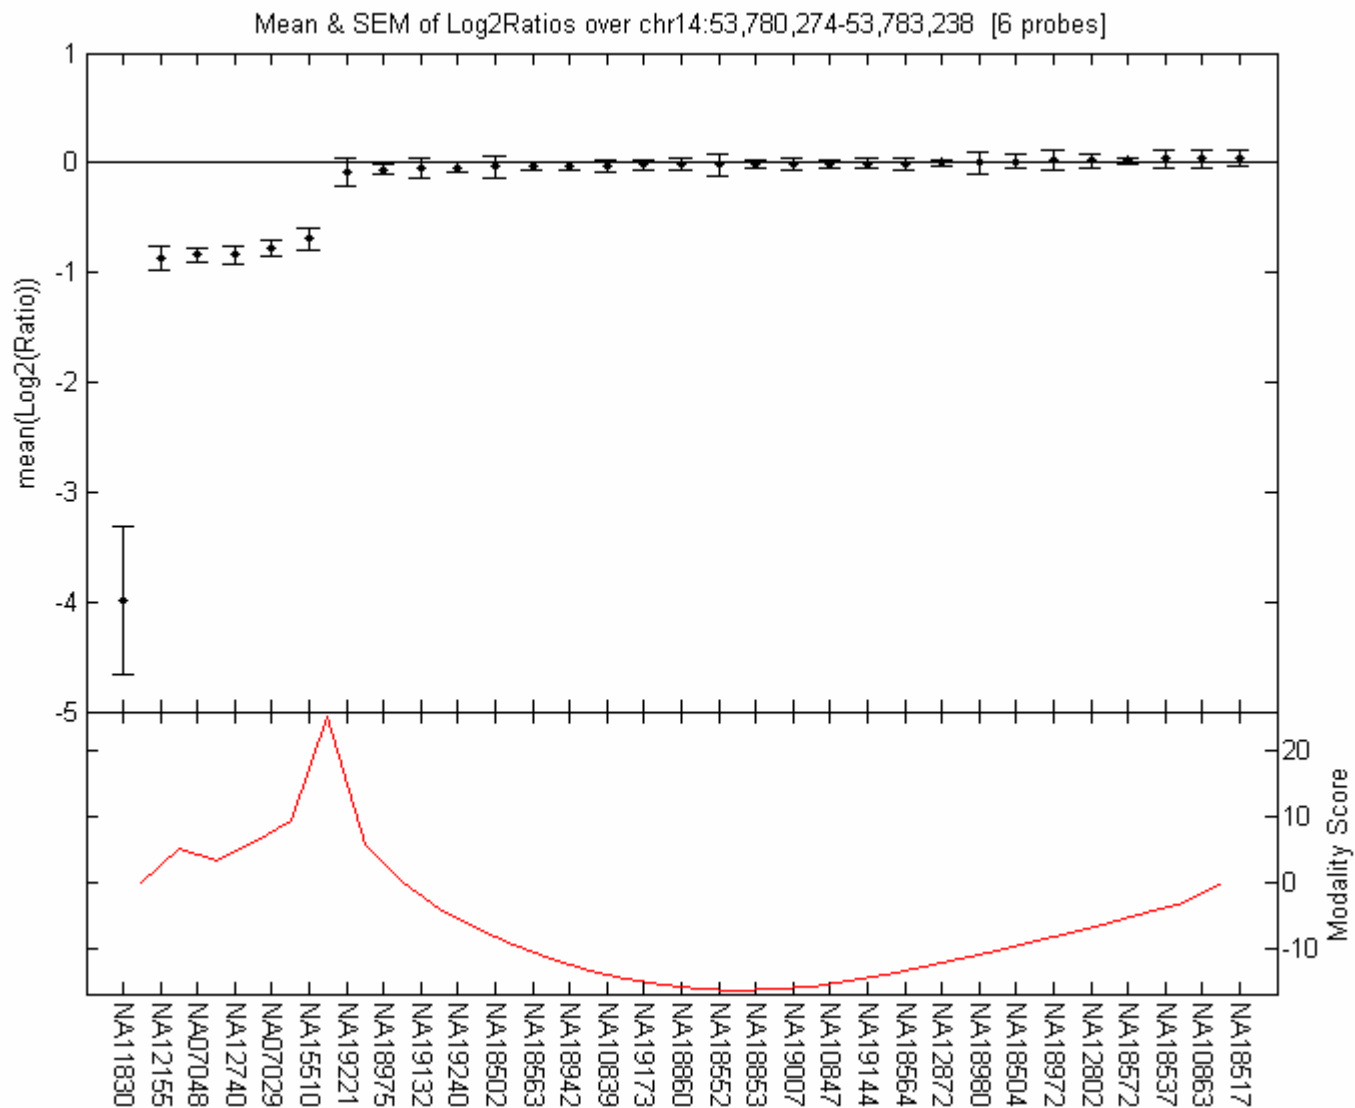

chr14:69,087,395-69,092,239 Score=19.6556

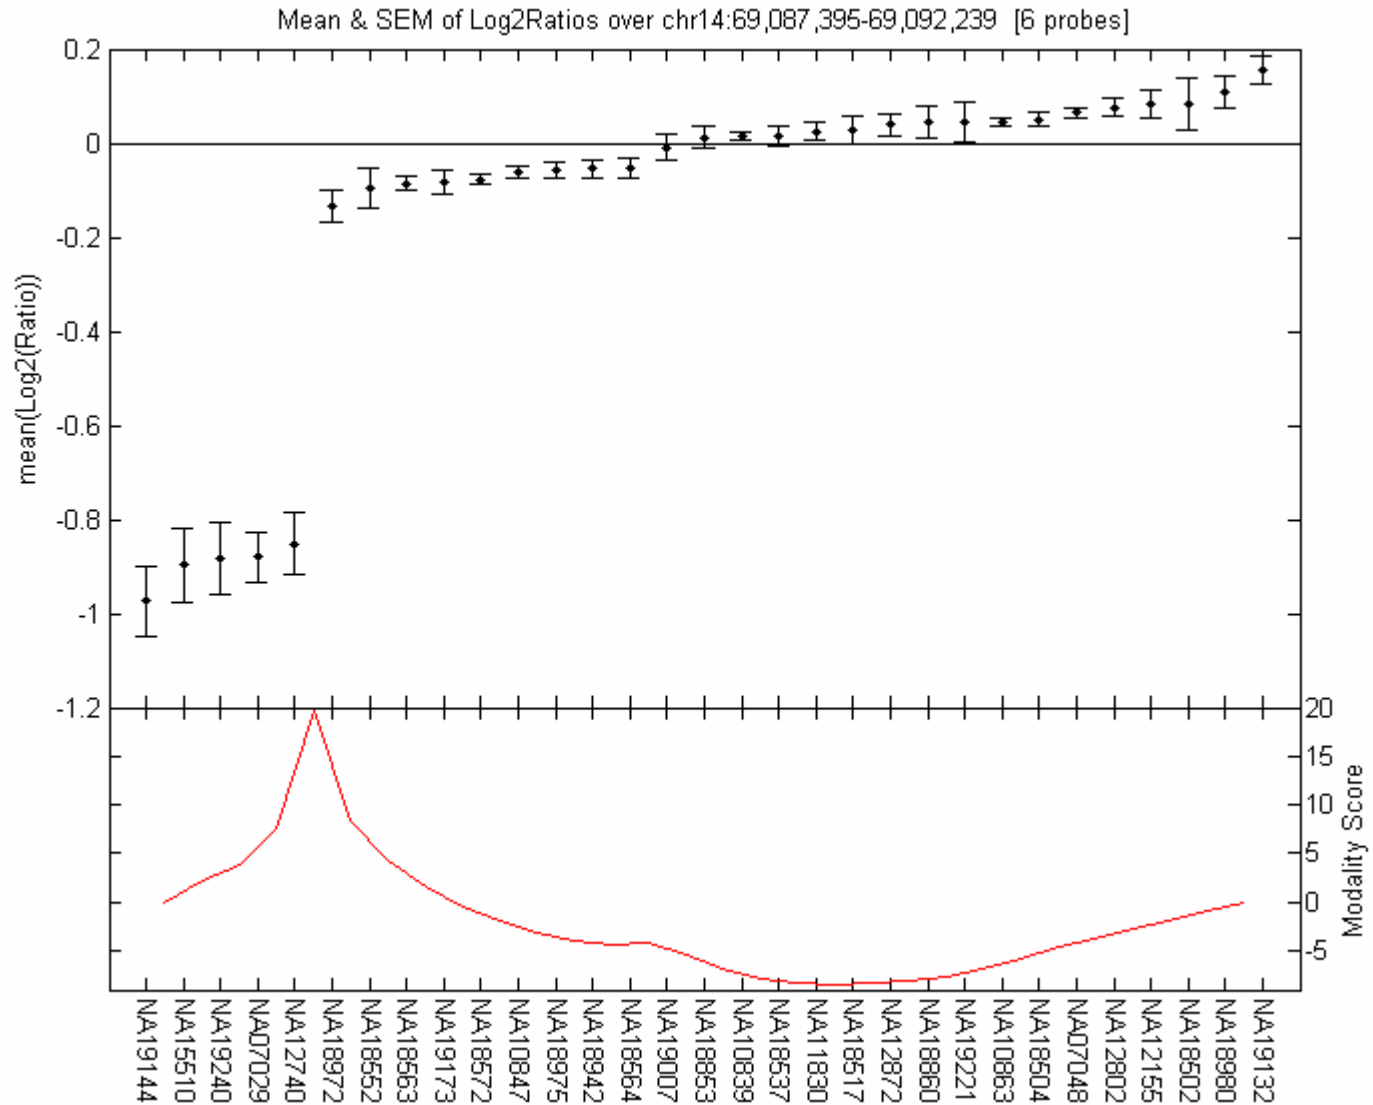



chr14:85,355,635-85,382,242 Score=22.7919

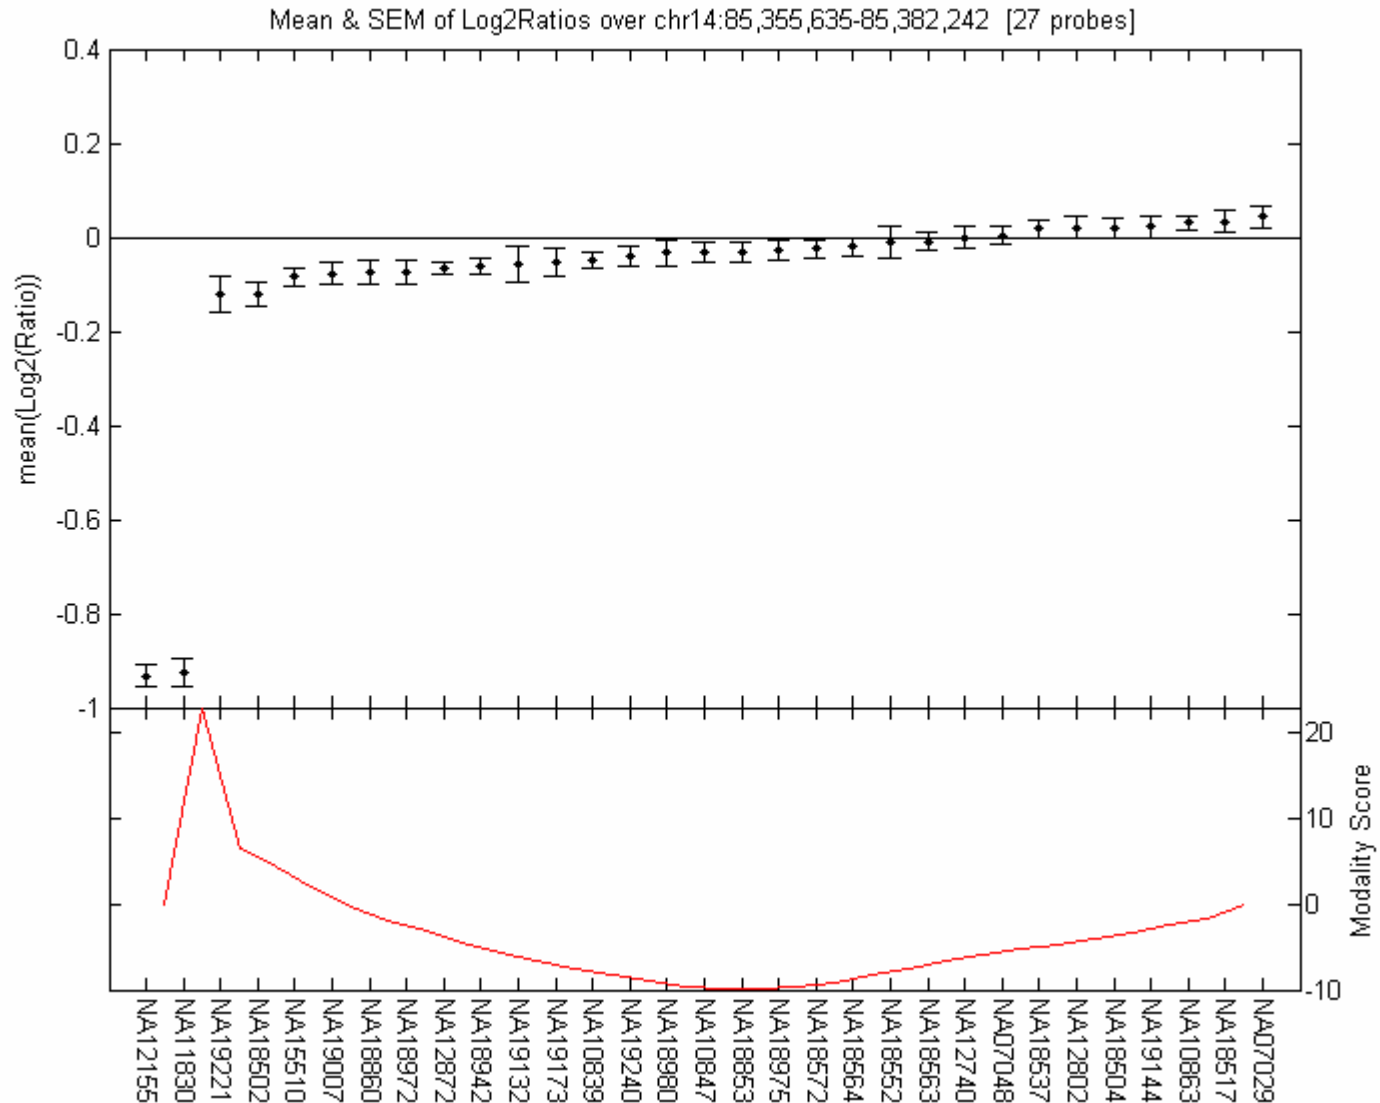

chr15:22,658,494-22,659,927 Score=13.549

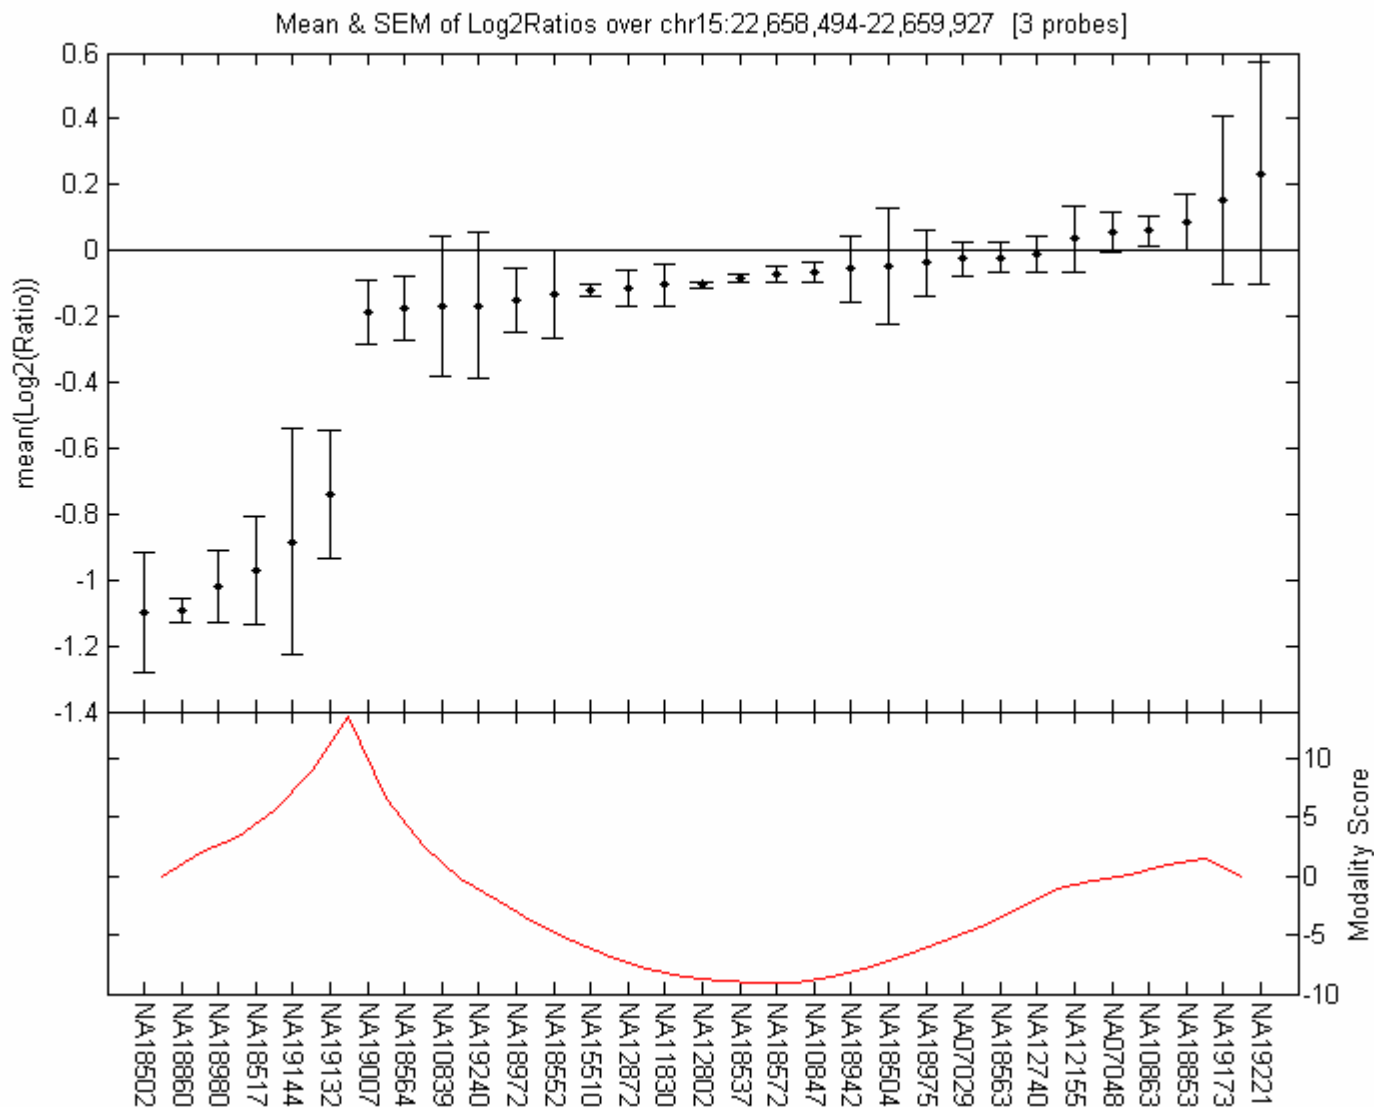

chr15:23,482,908-23,483,437 Score=10.9984

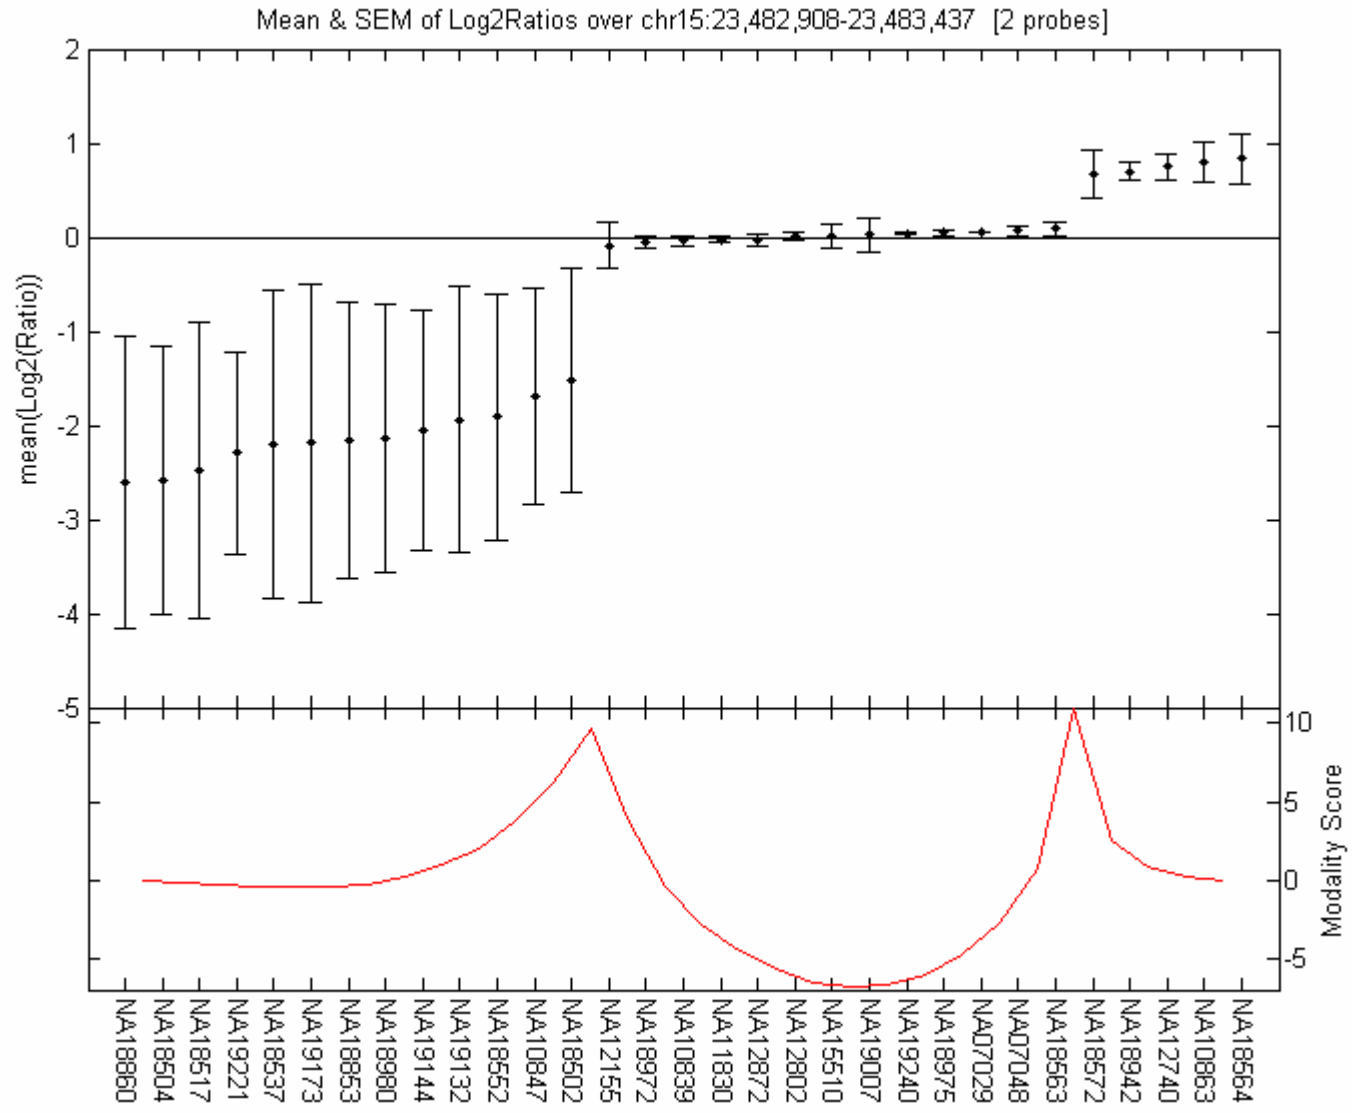

chr15:27,688,480-27,690,197 Score=13.826

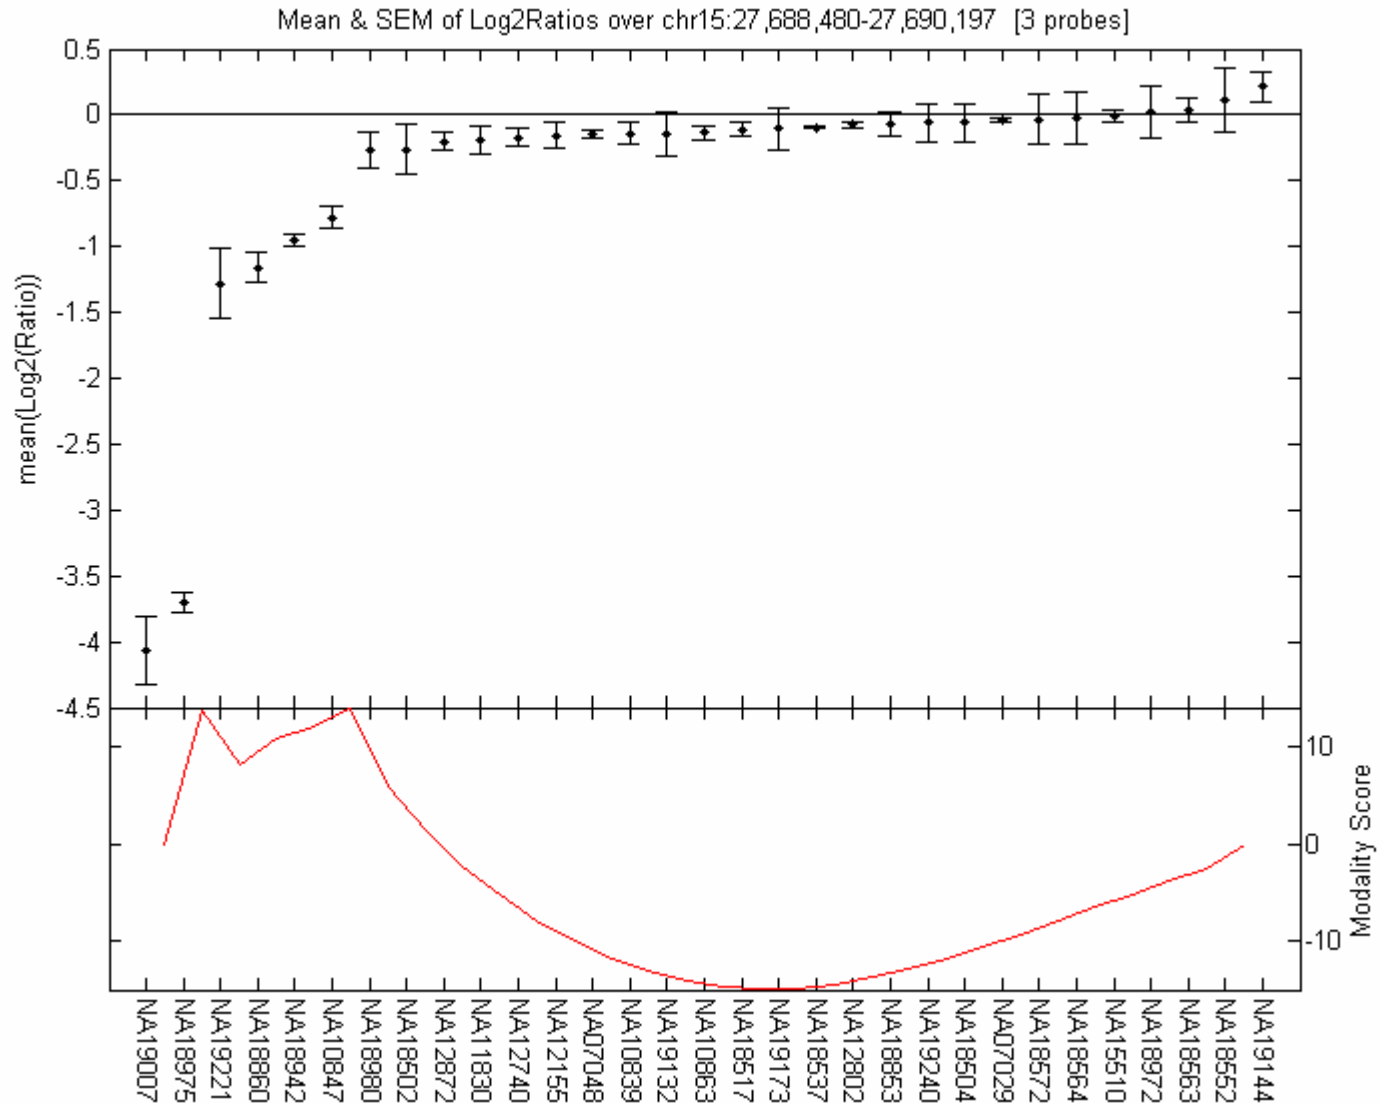

chr15:54,577,360-54,579,789 Score=28.2654

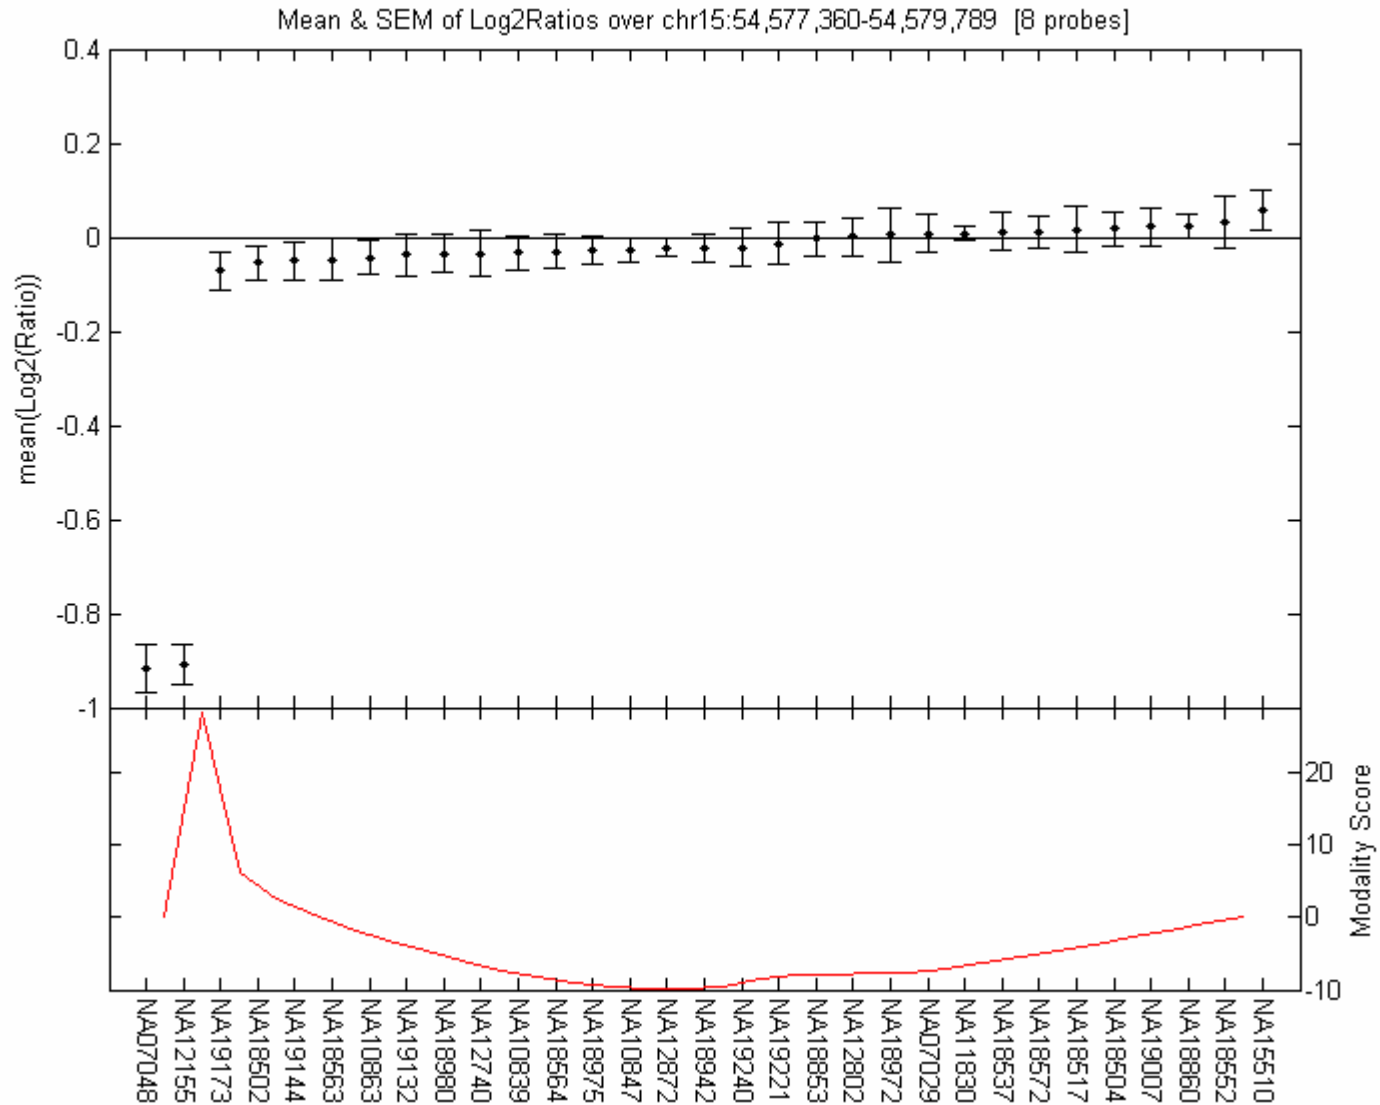

chr15:98,234,327-98,239,350 Score=12.1673

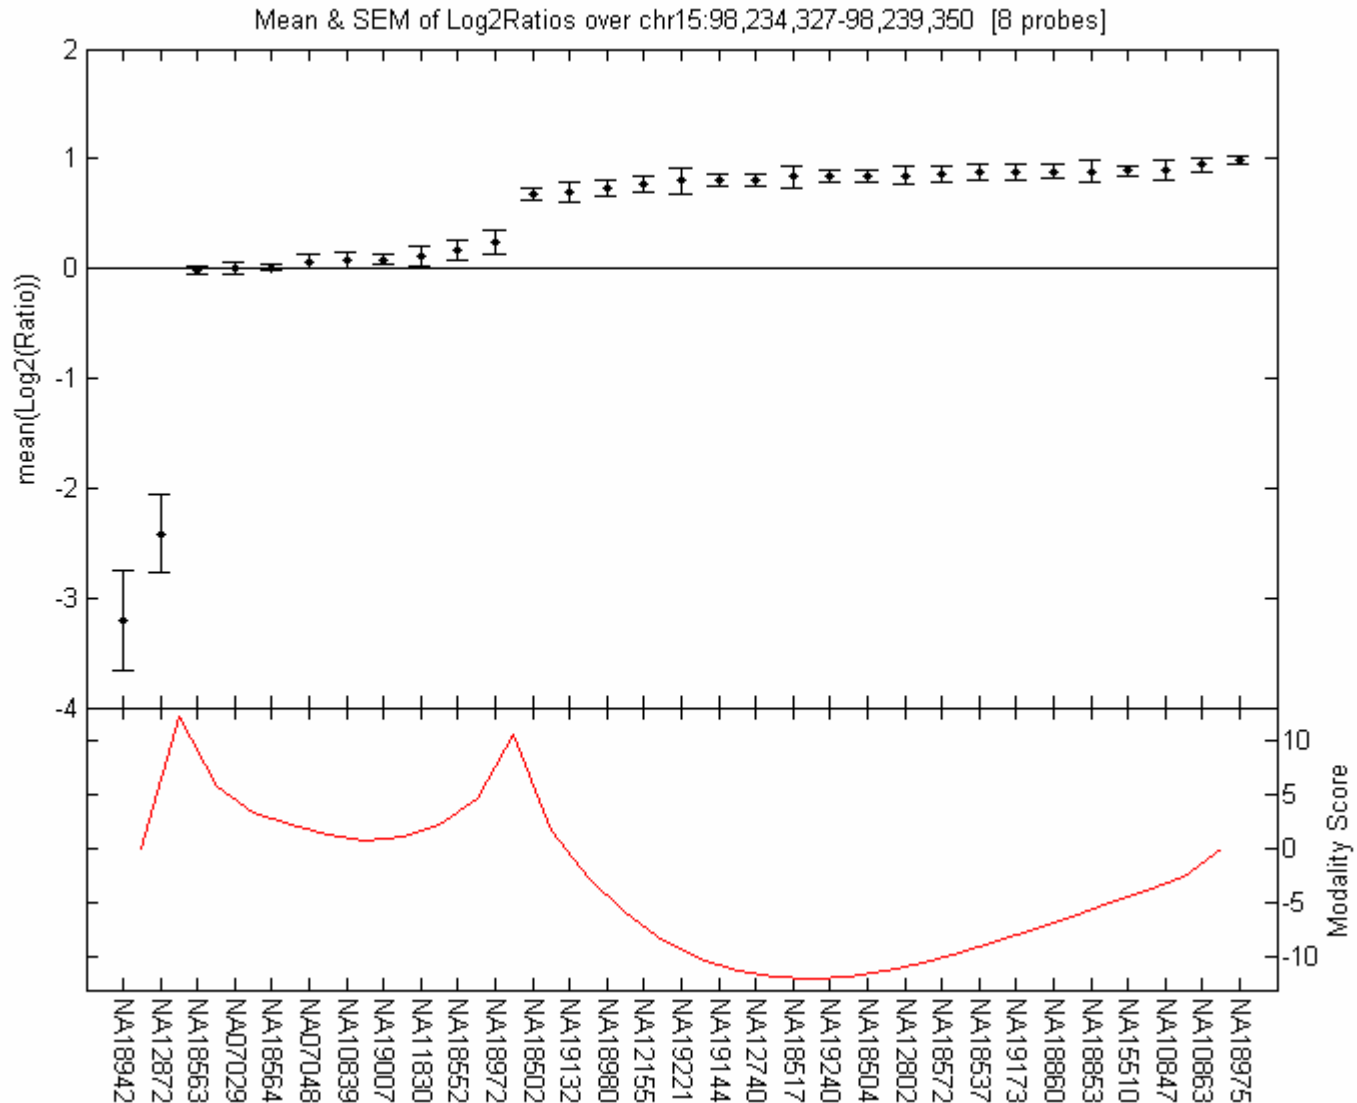

chr16:2,638,609-2,639,826 Score=13.033

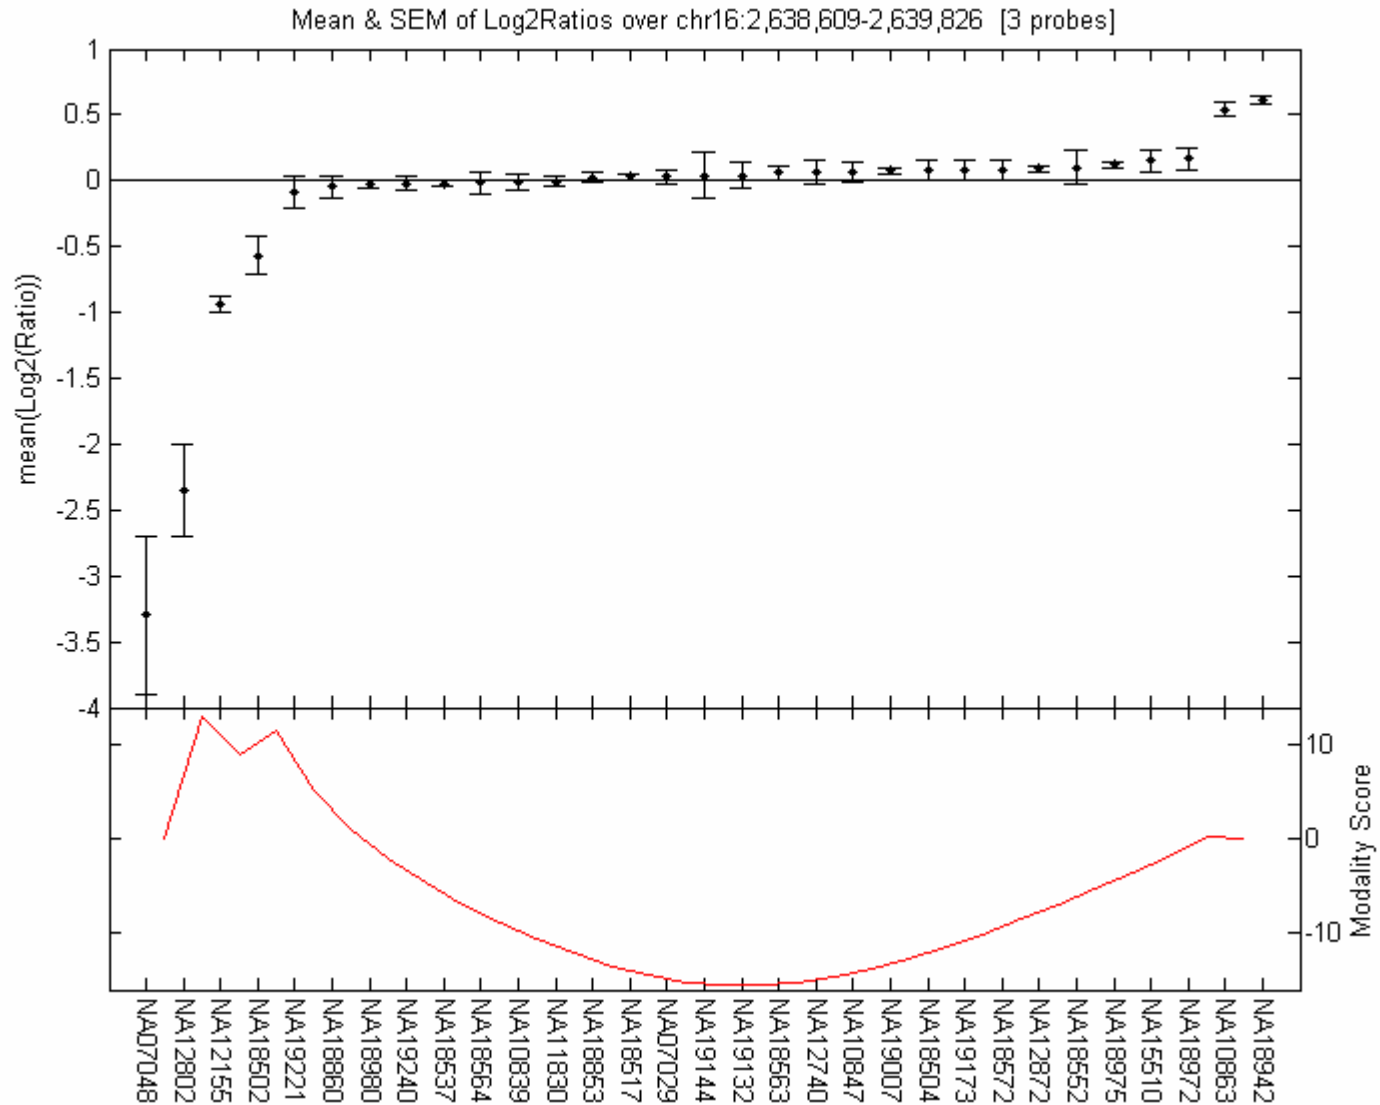

chr16:5,367,907-5,369,326 Score=16.9359

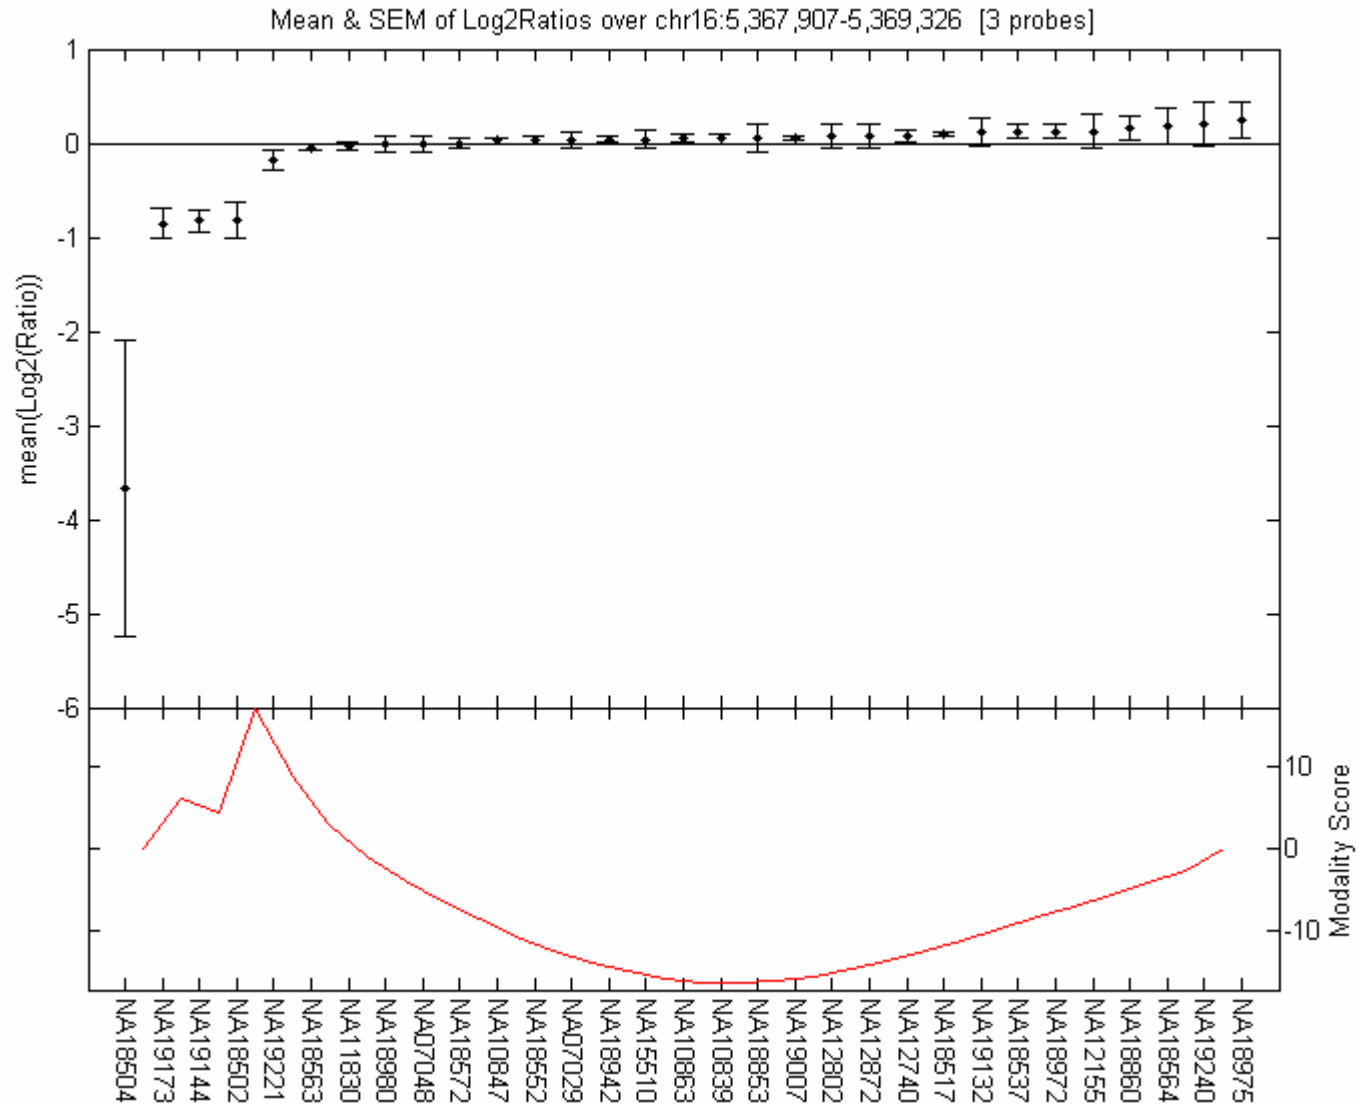



chr16:19,853,587-19,867,345 Score=29.4269

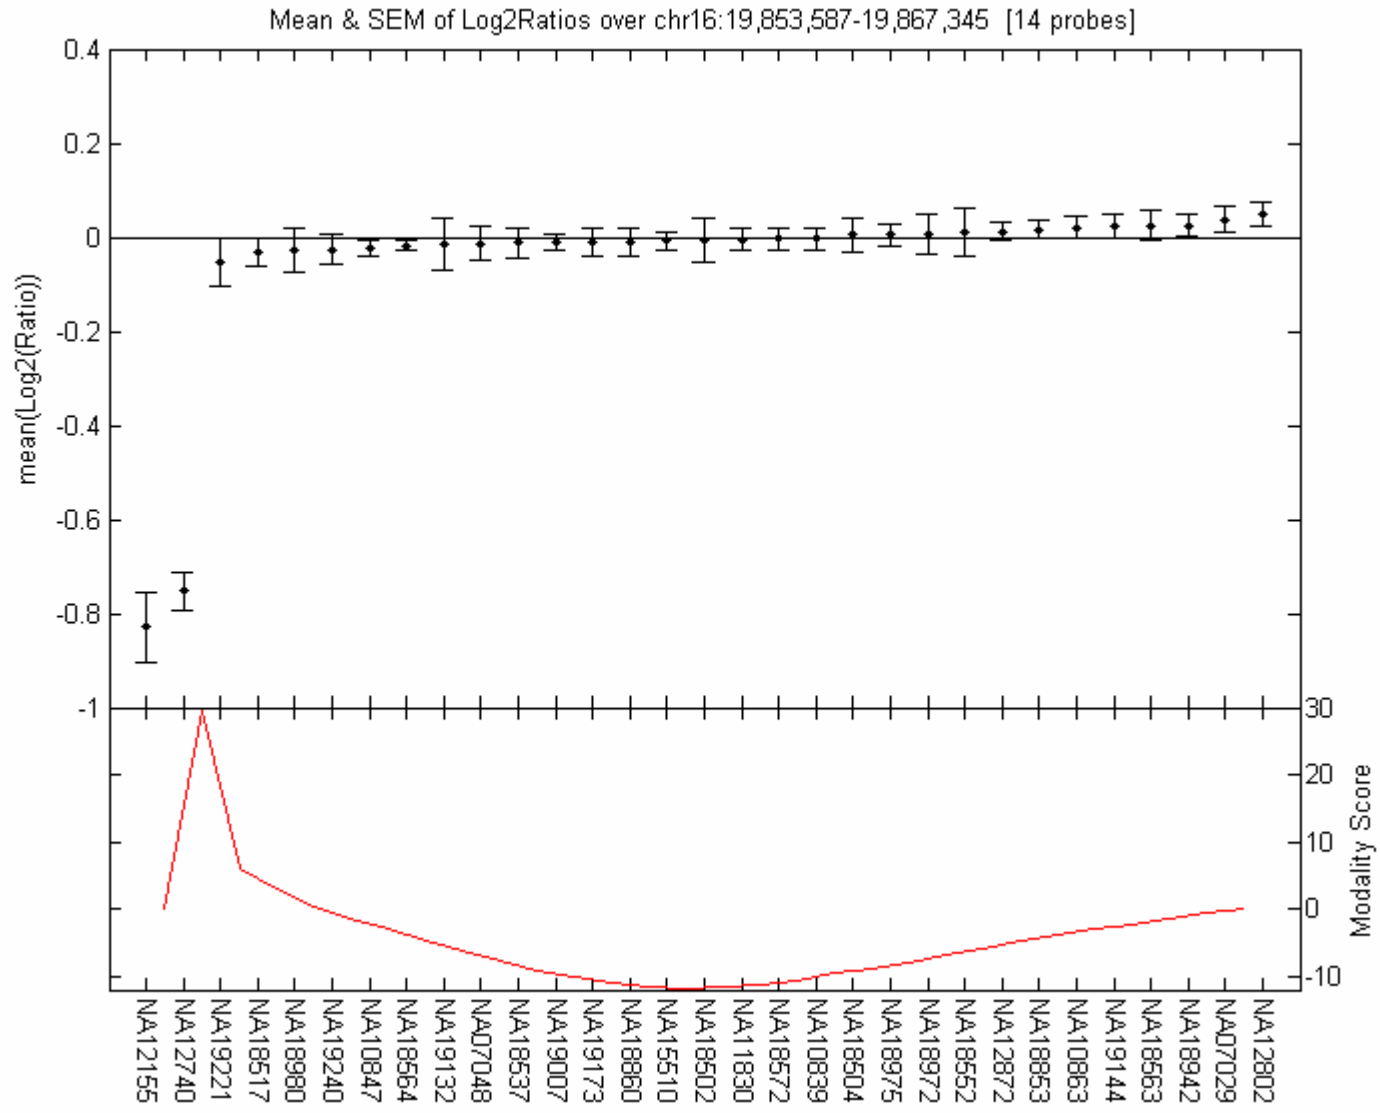

chr16:20,420,055-20,441,310 Score=23.5176

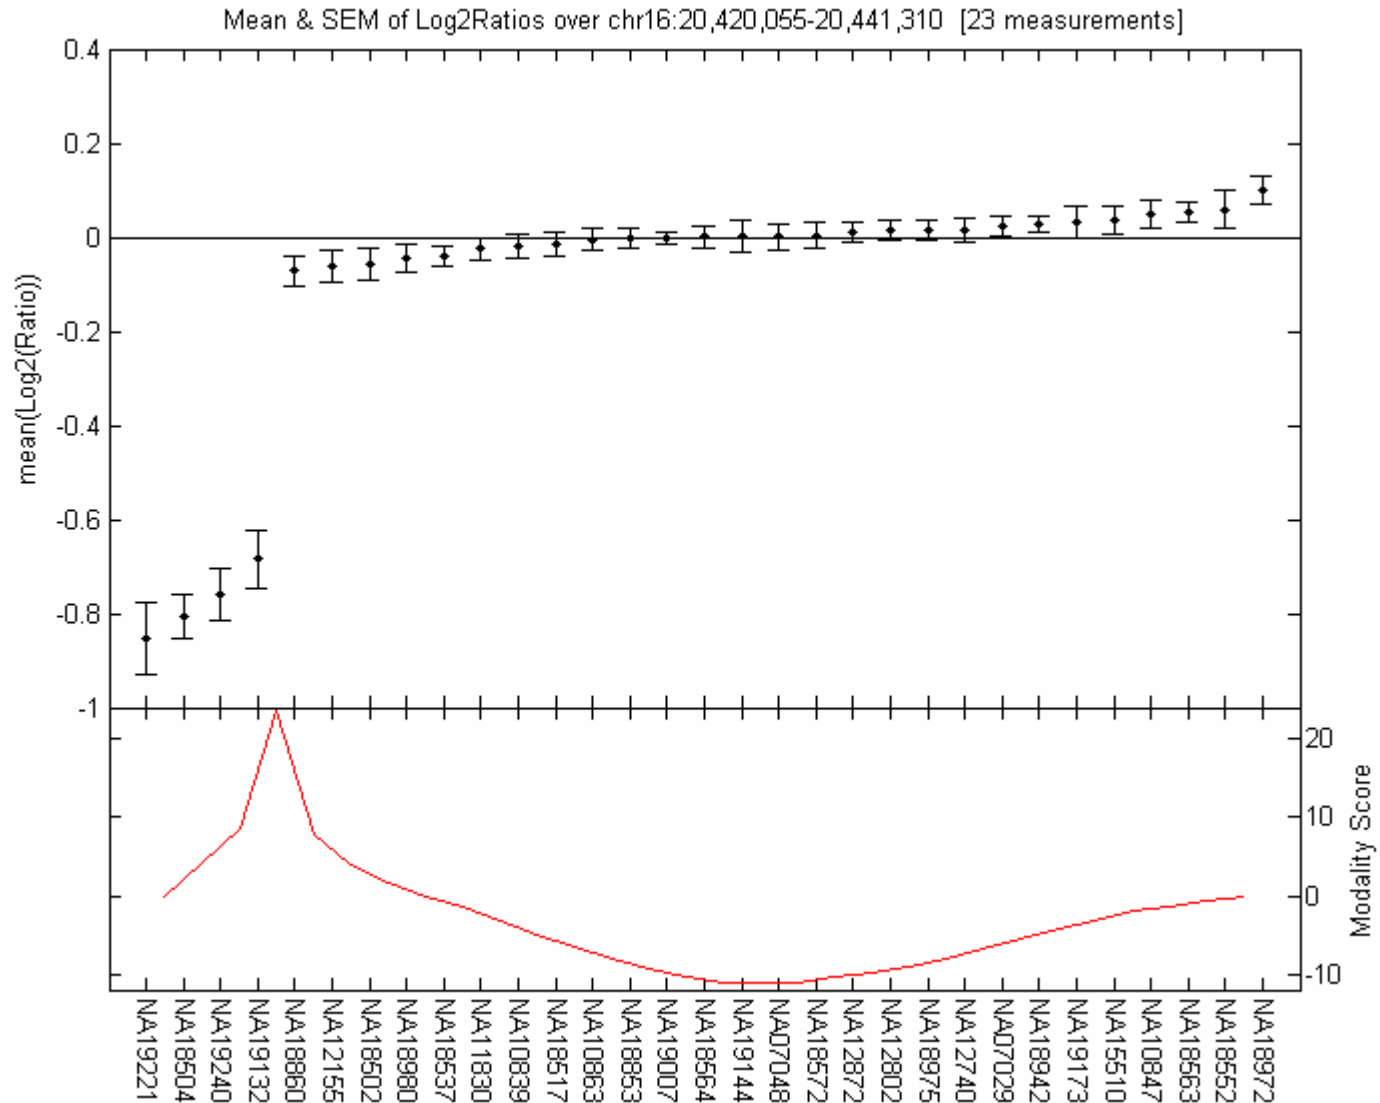

chr16:68,602,755-68,666,385 Score=12.6502

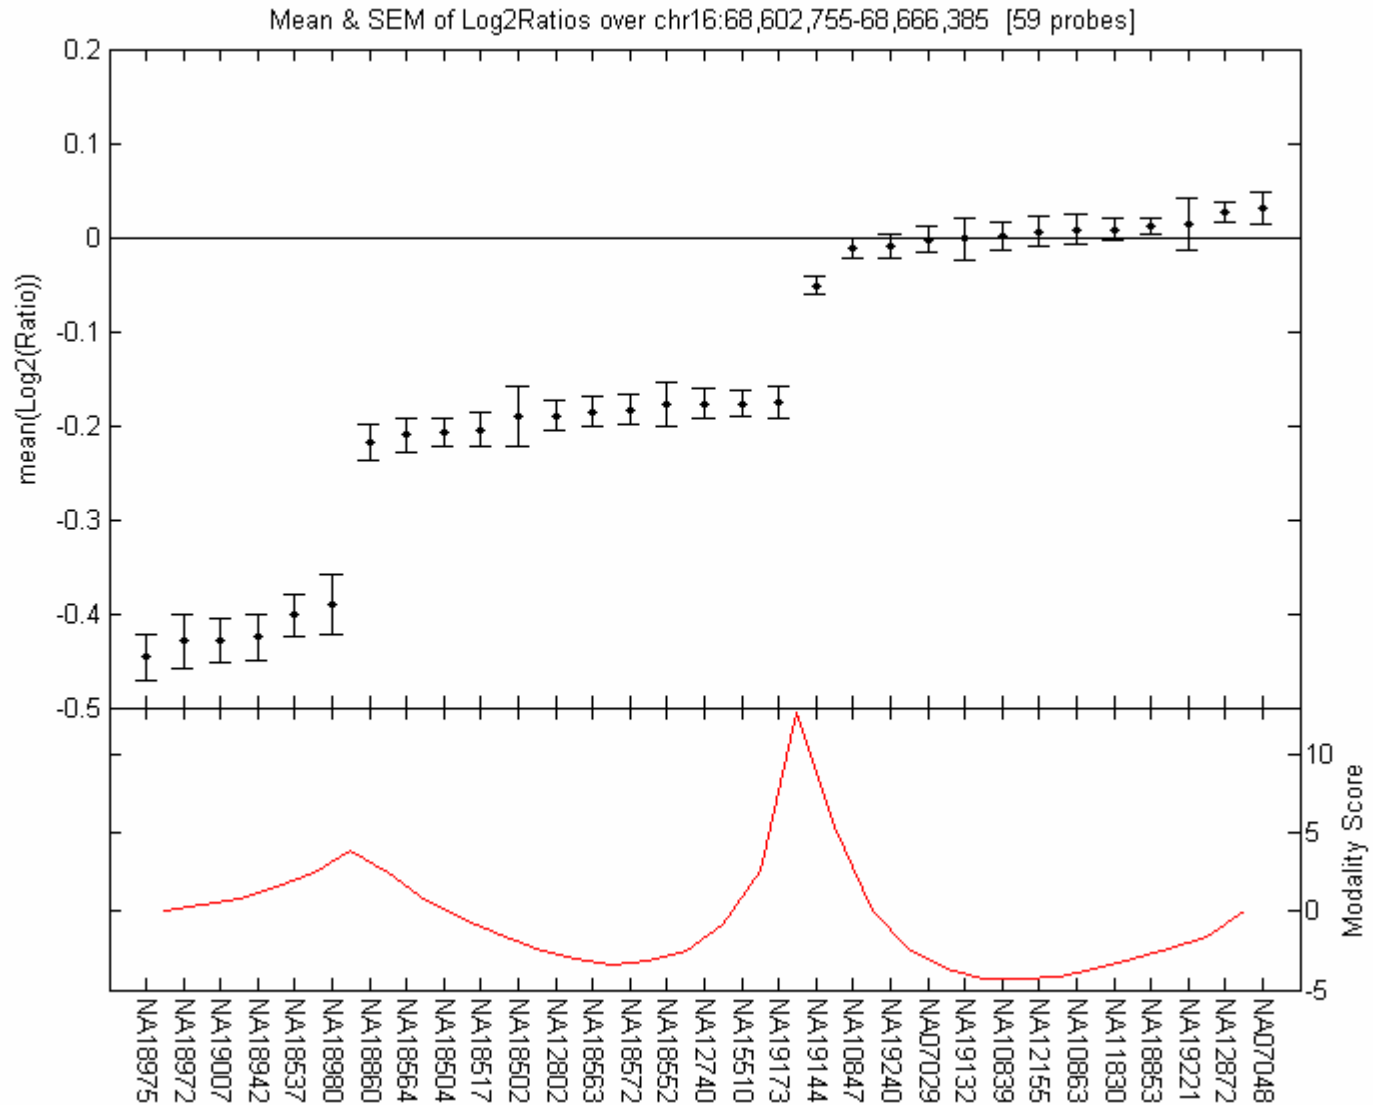

chr16:79,536,443-79,540,299 Score=23.6676

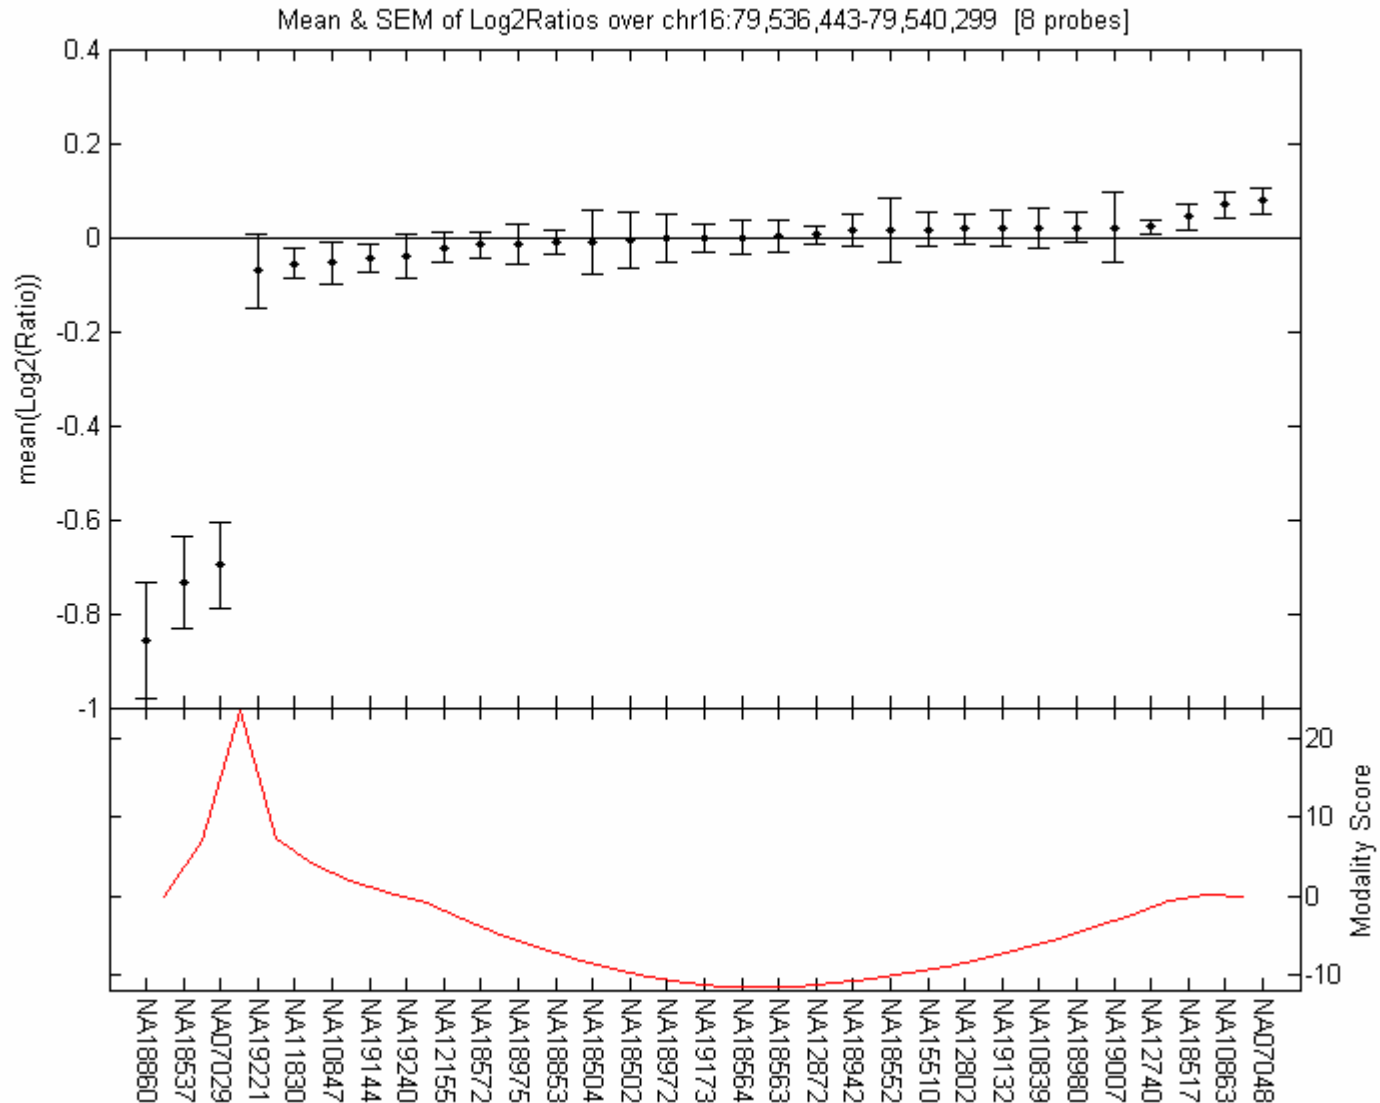

chr16:88,659,675-88,661,364 Score=16.5077

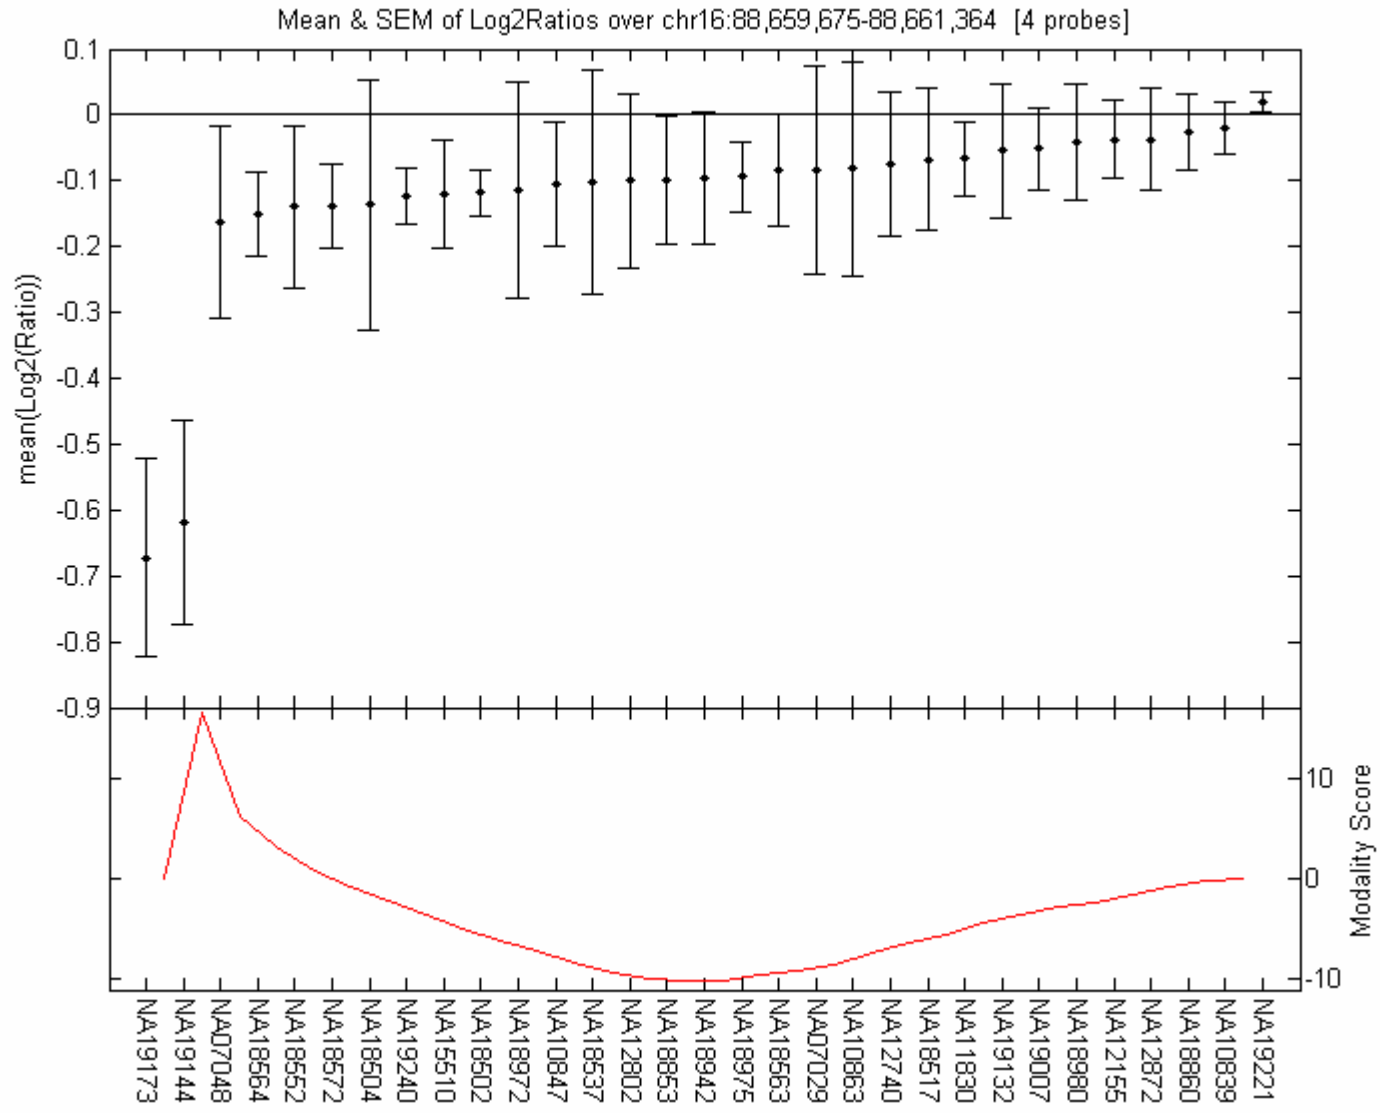

chr17:14,985,264-14,999,318 Score=24.6383

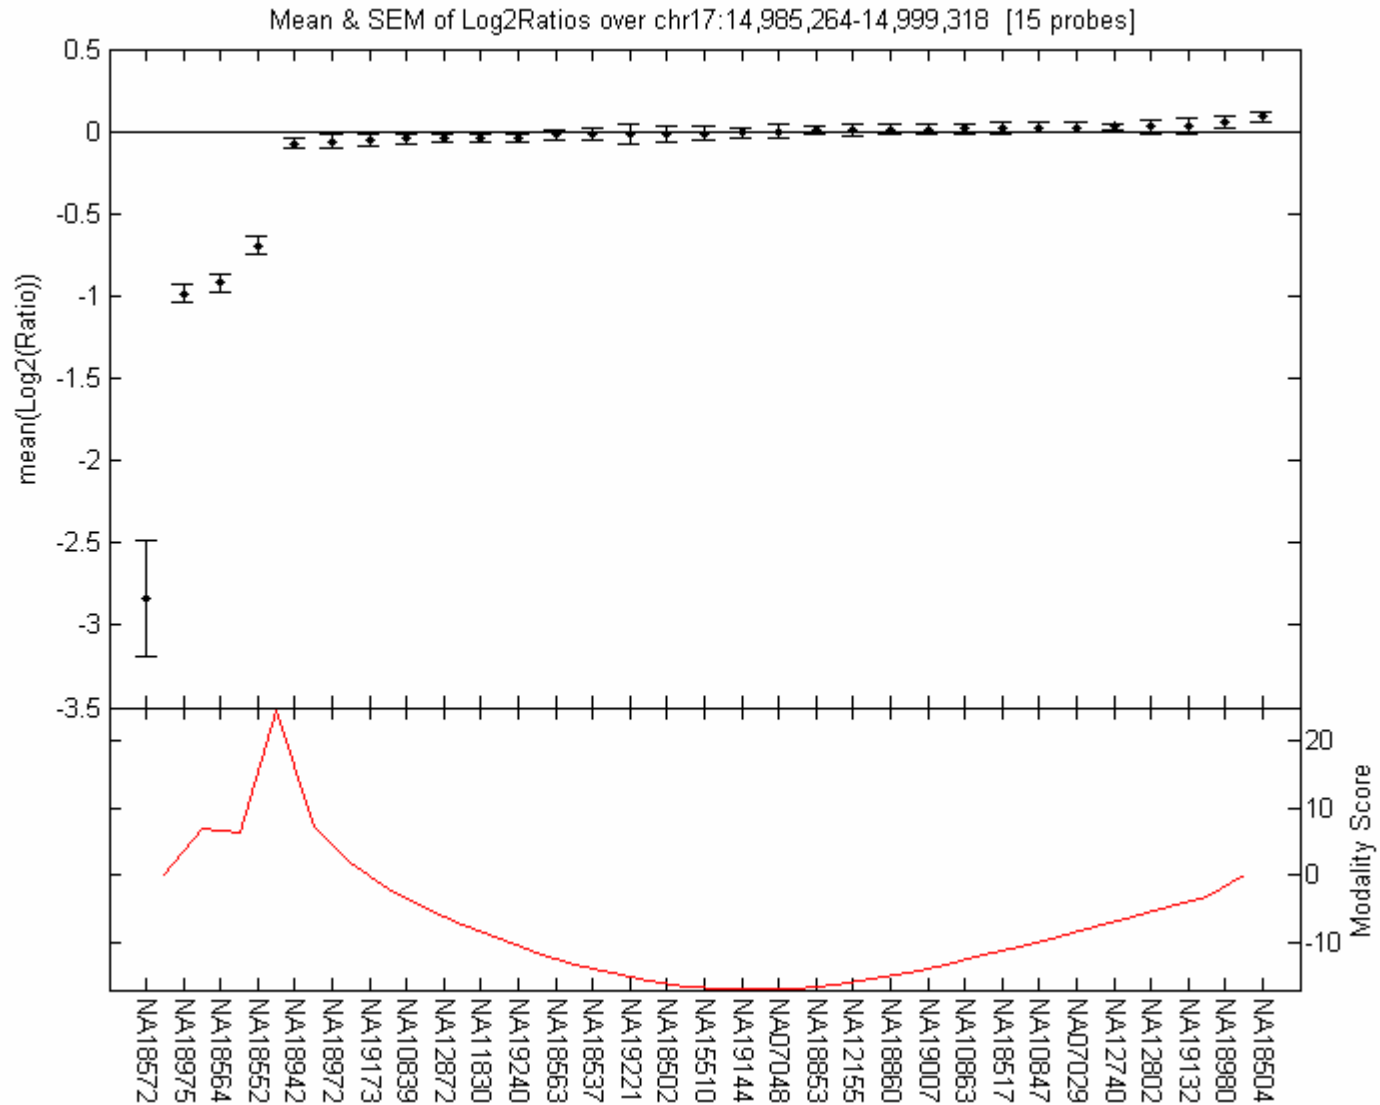

chr17:21,310,951-21,313,122 Score=14.6758

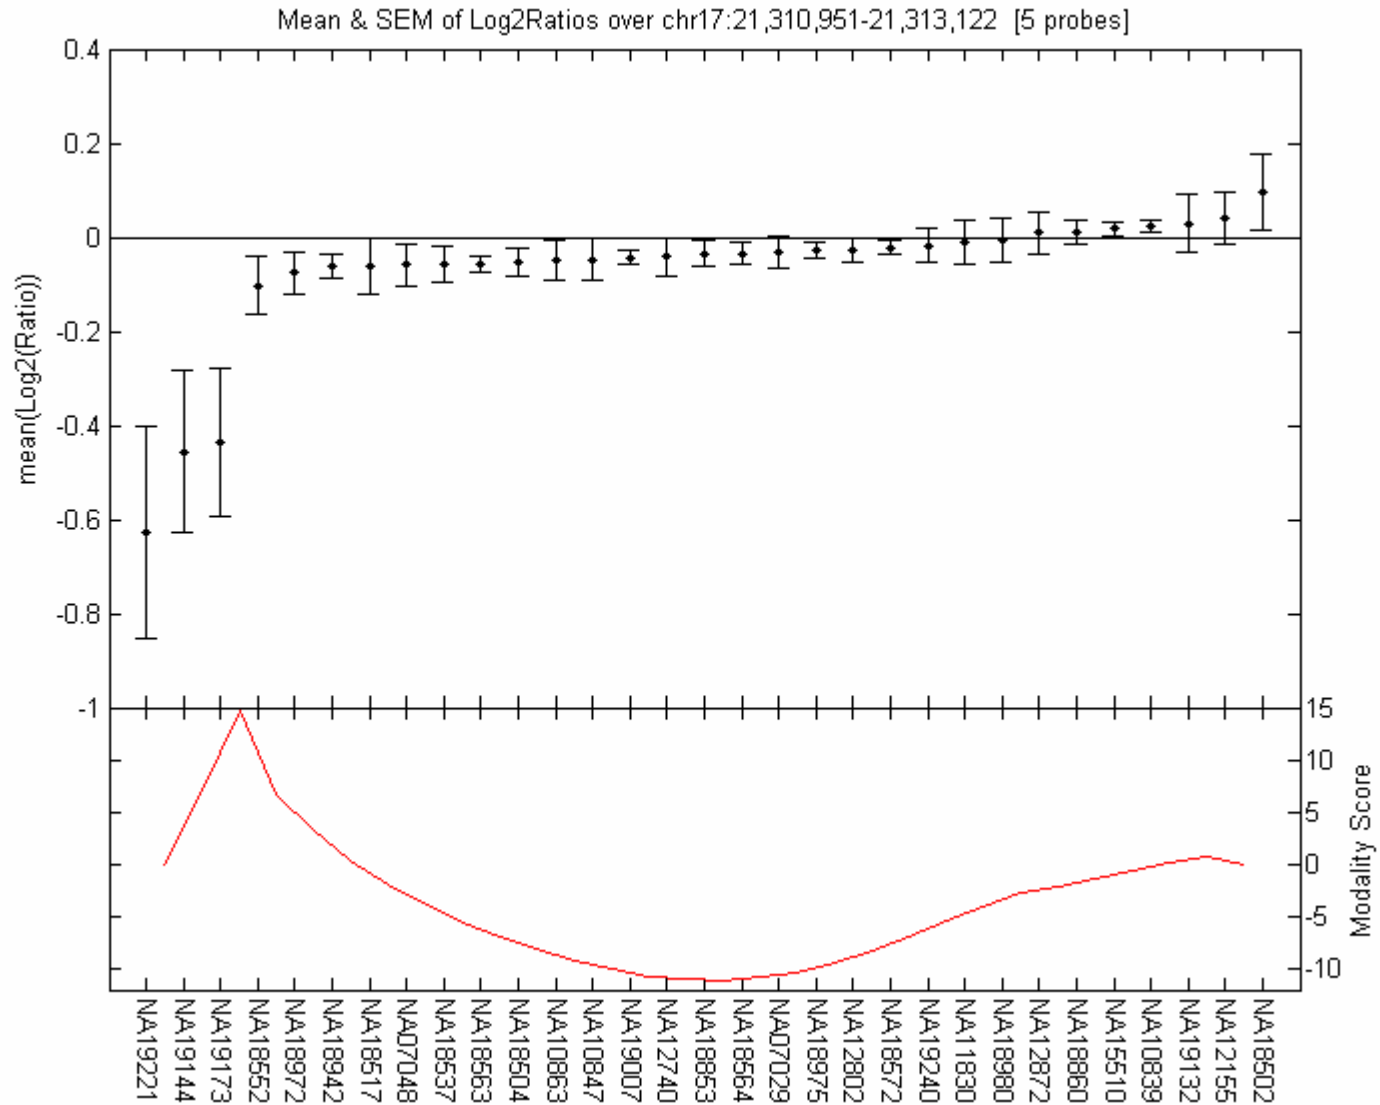

chr17:36,761,595-36,779,070 Score=21.5071

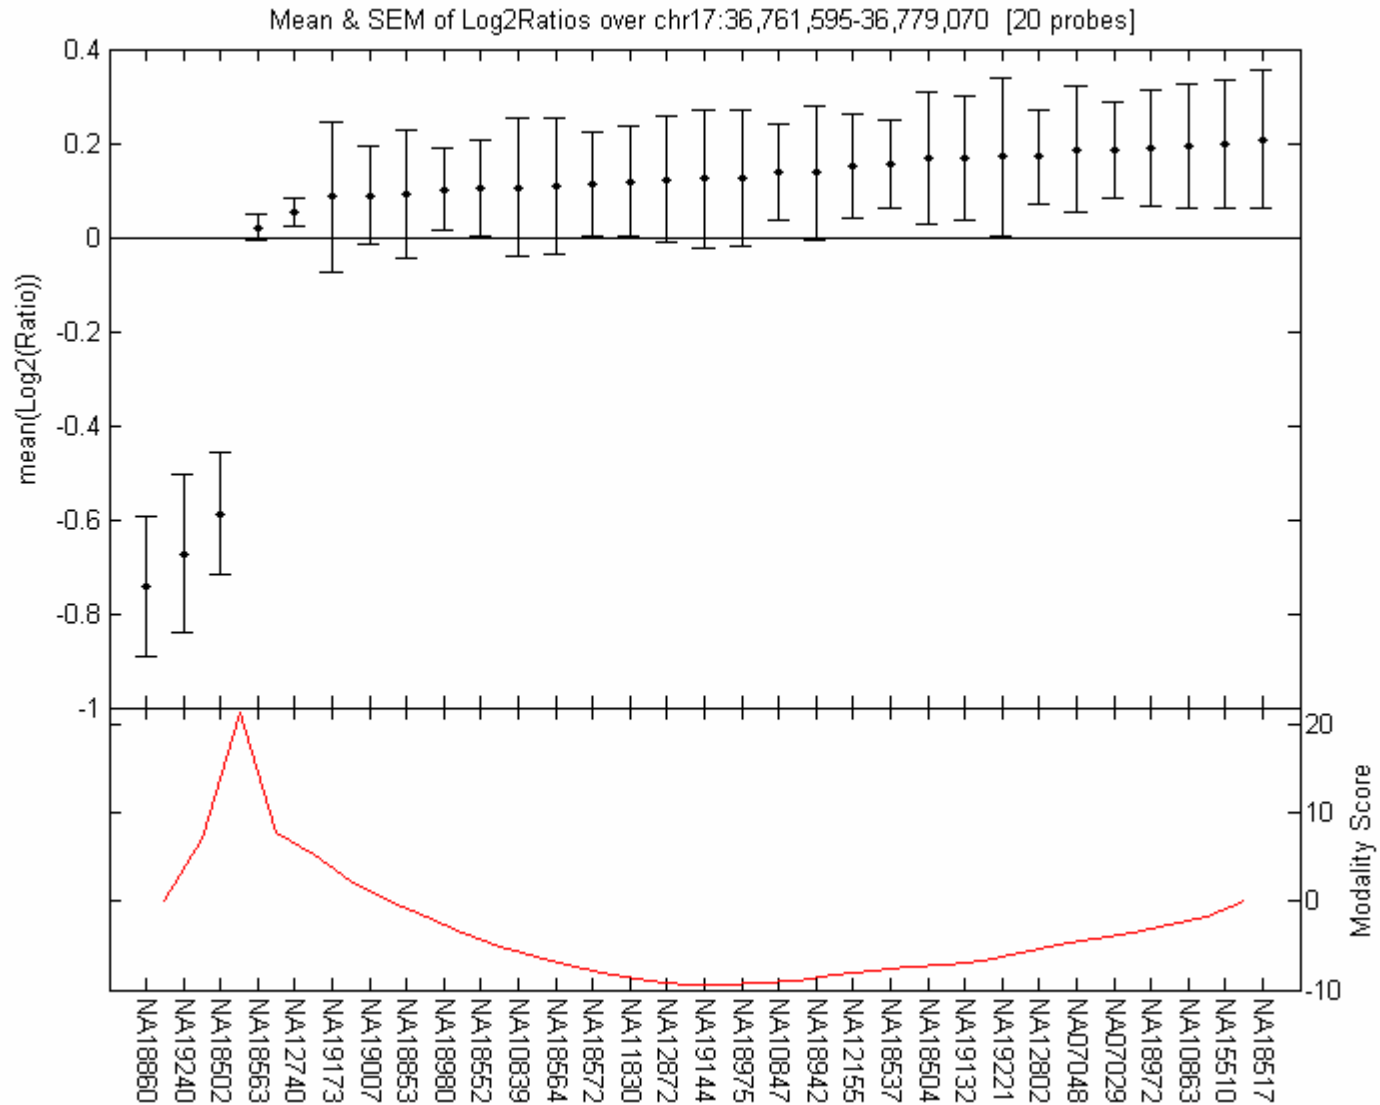



chr17:54,719,289-54,719,841 Score=21.5315

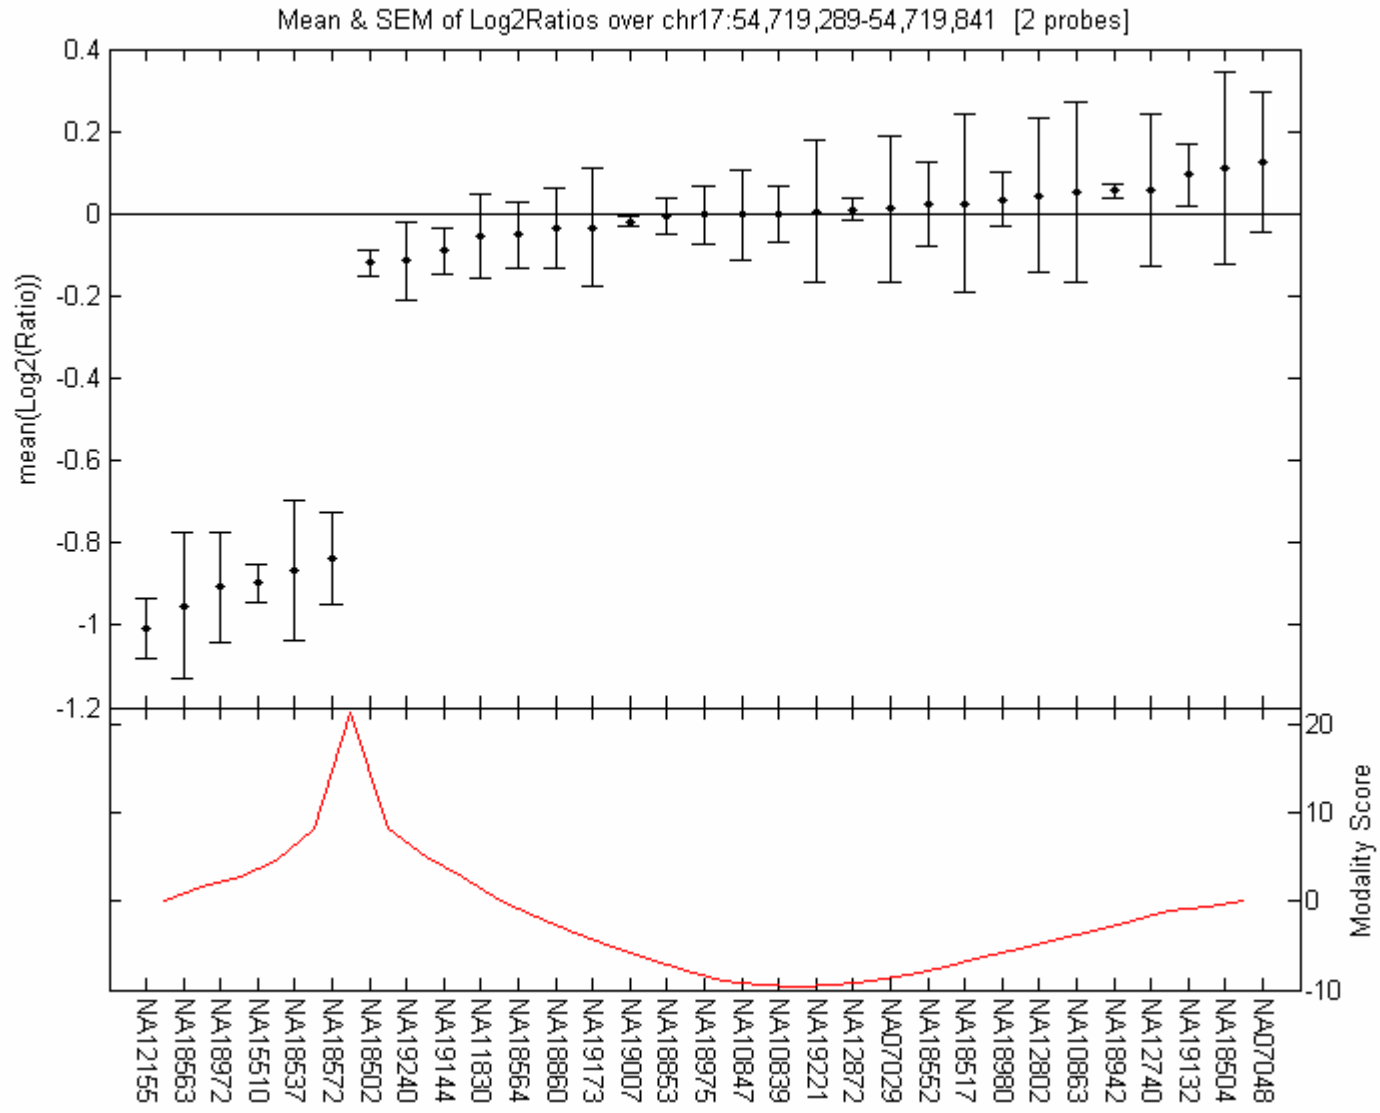

chr18:61,874,483-61,882,738 Score=21.2591

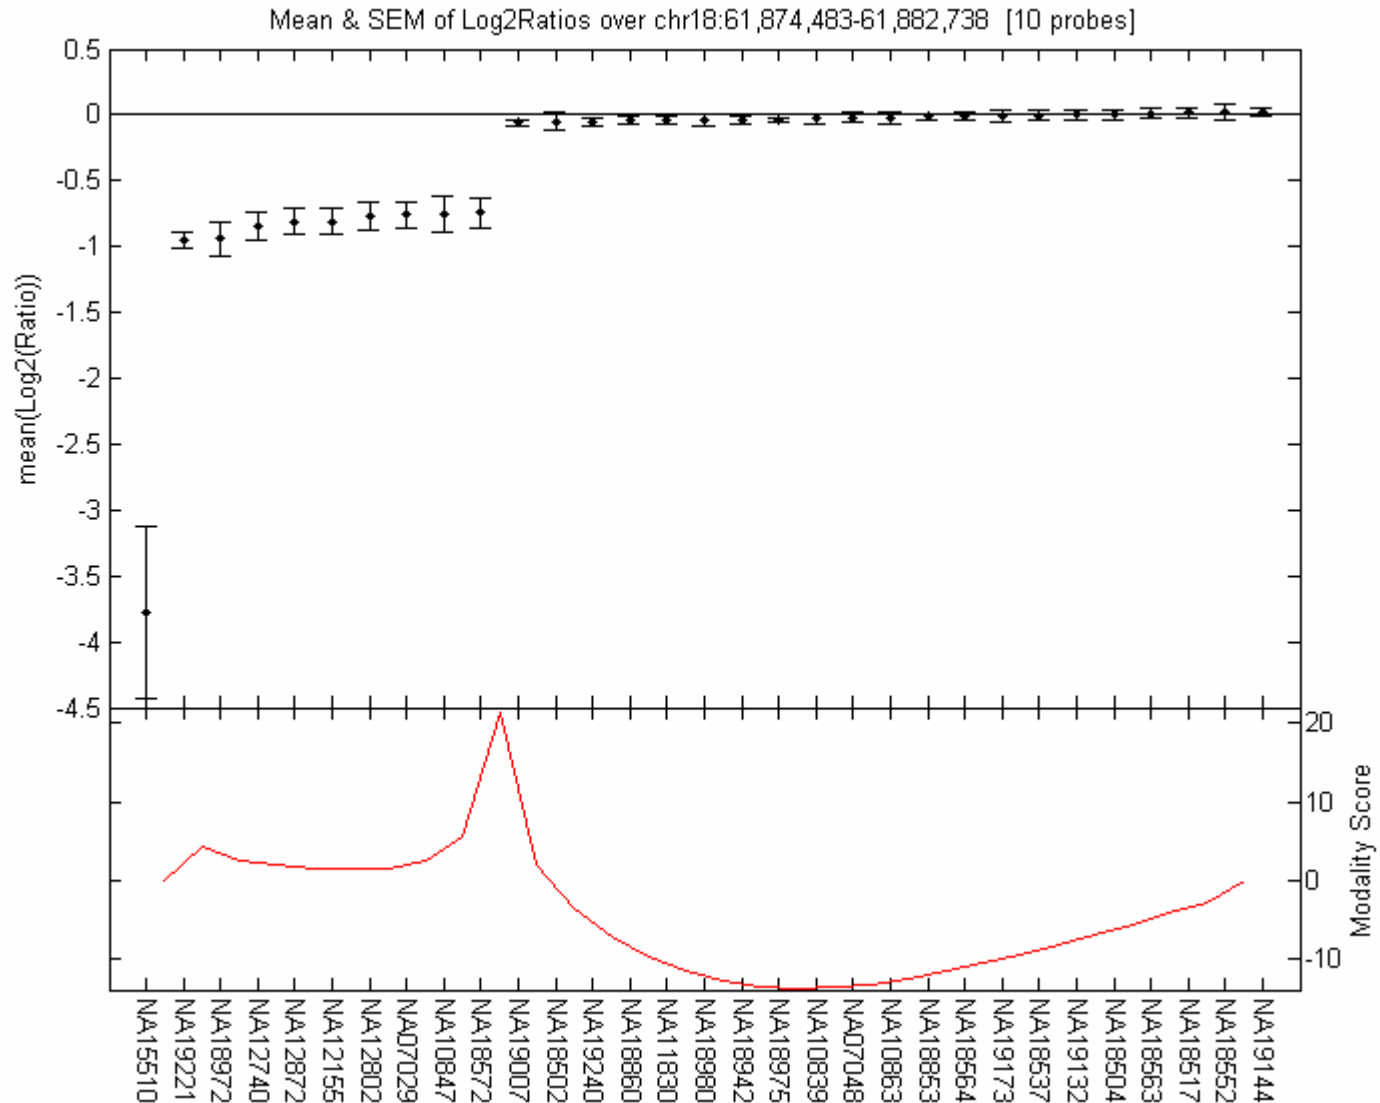

chr19:23,596,541-23,599,600 Score=11.858

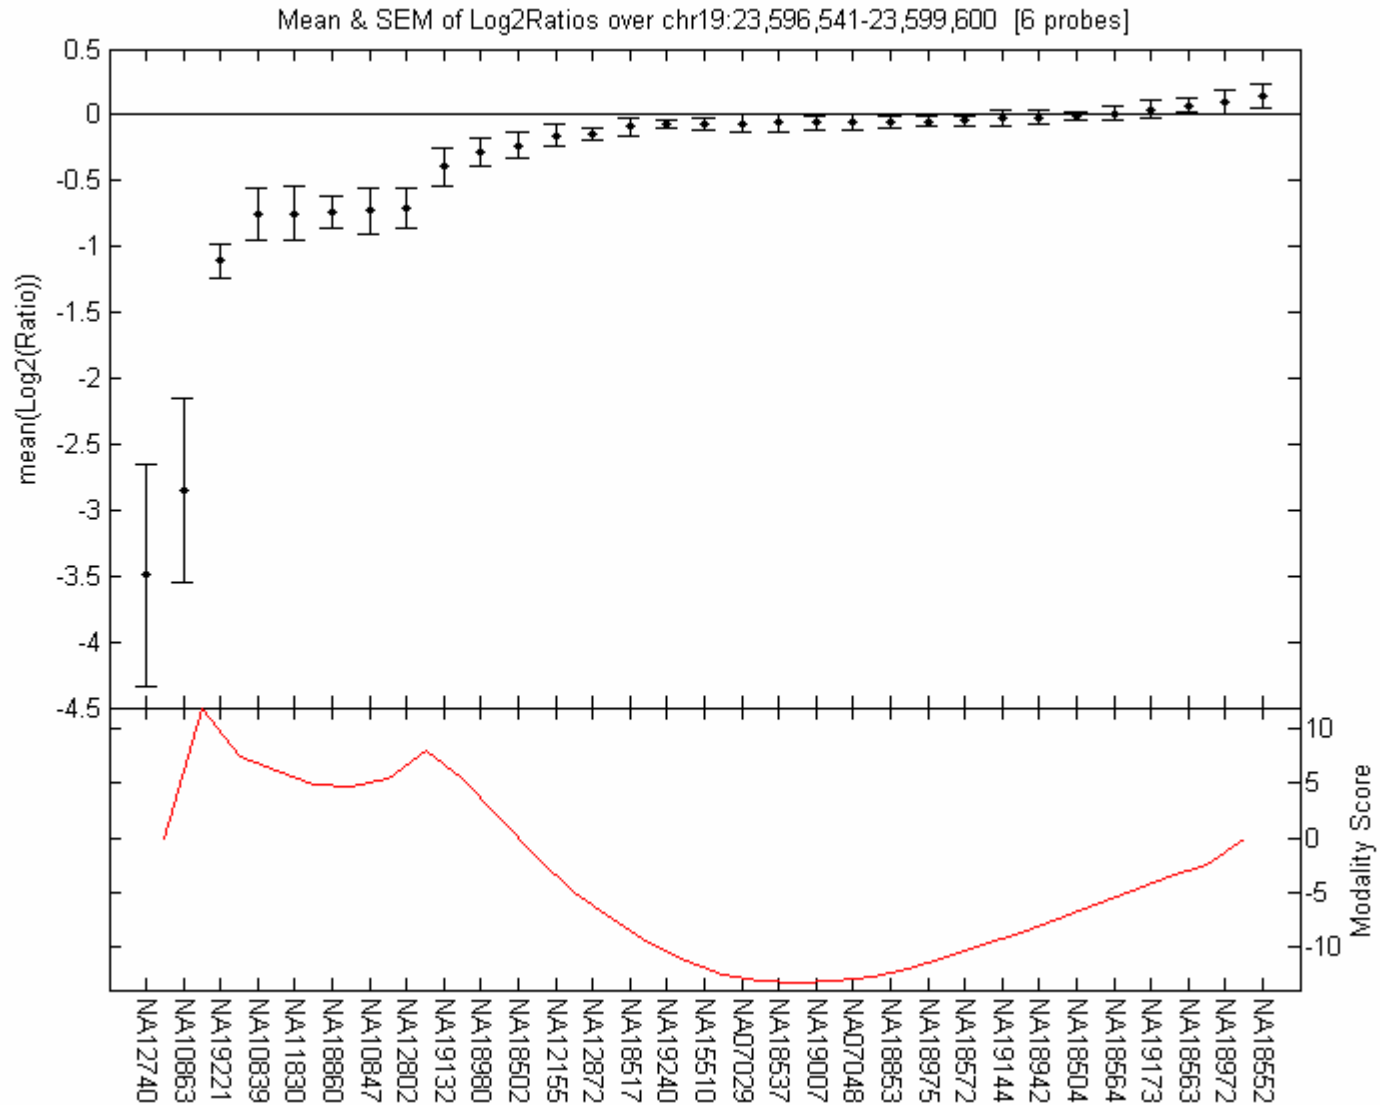

chr19:23,685,598-23,686,210 Score=12.7133

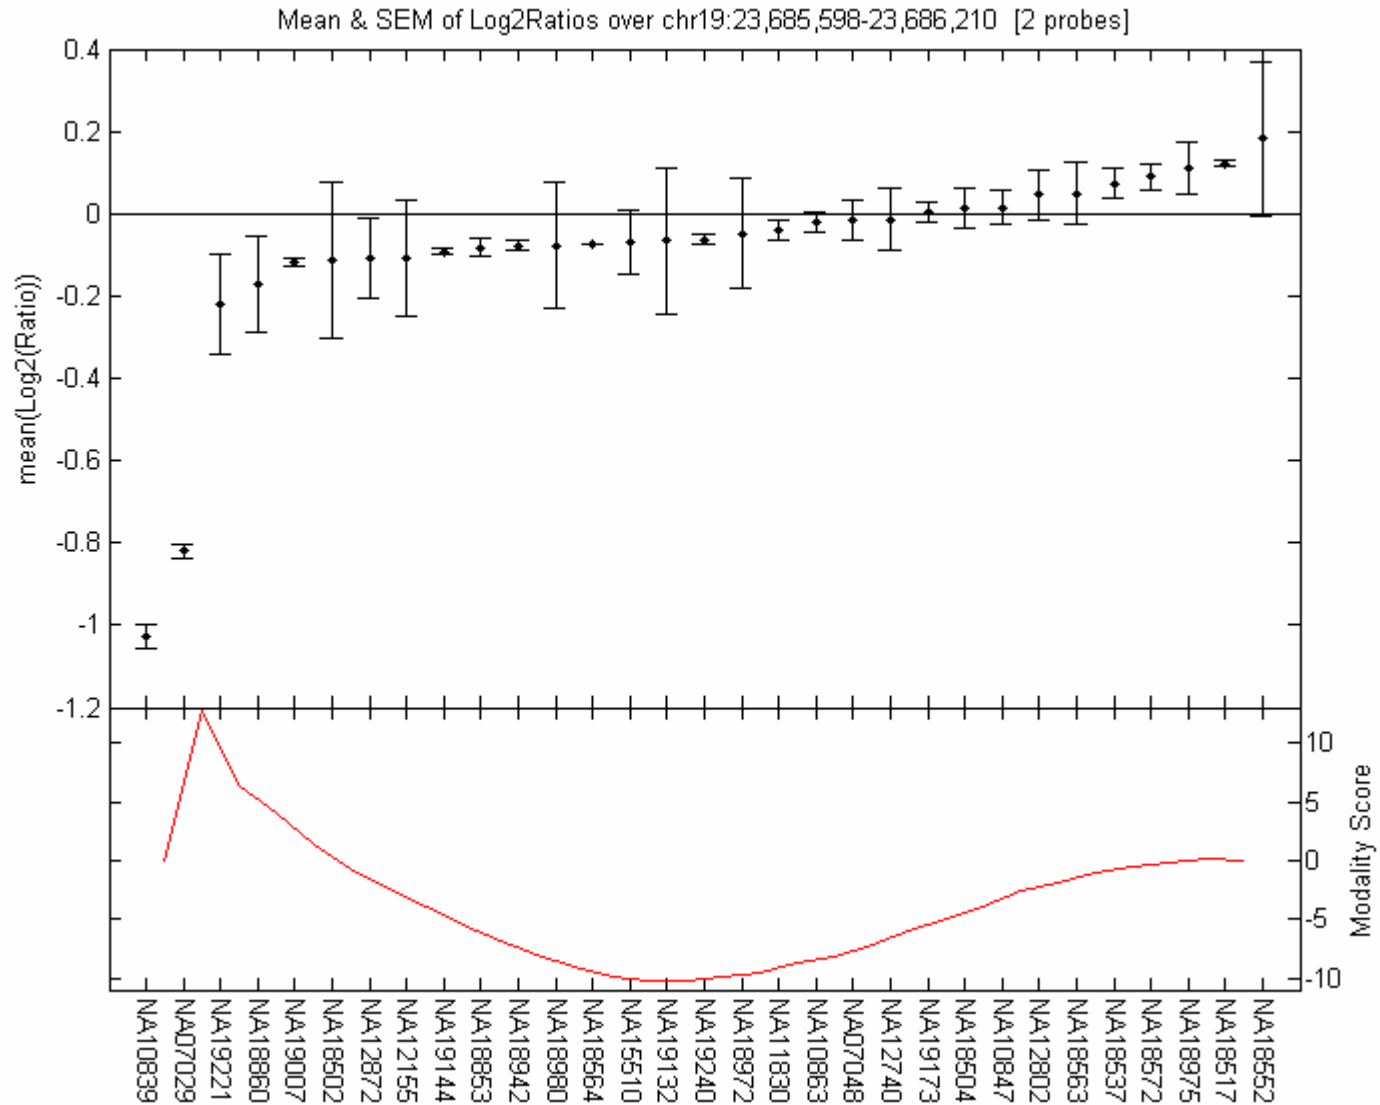

chr19:39,832,668-39,839,521 Score=22.599

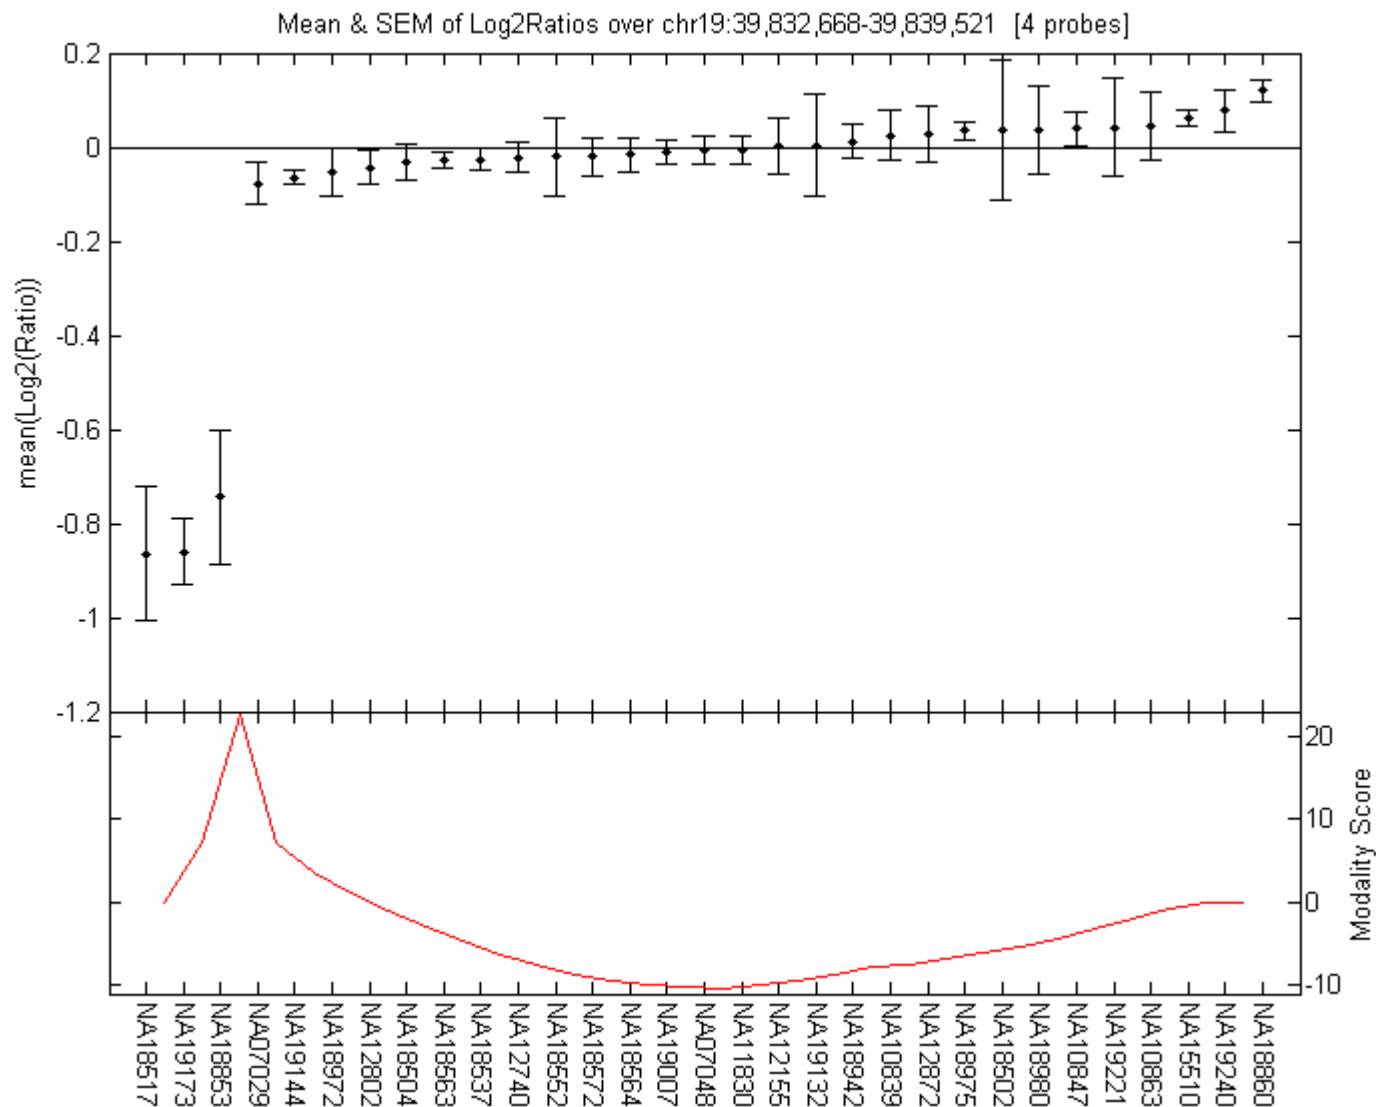

chr20:1,511,660-1,532,182 Score=15.0497

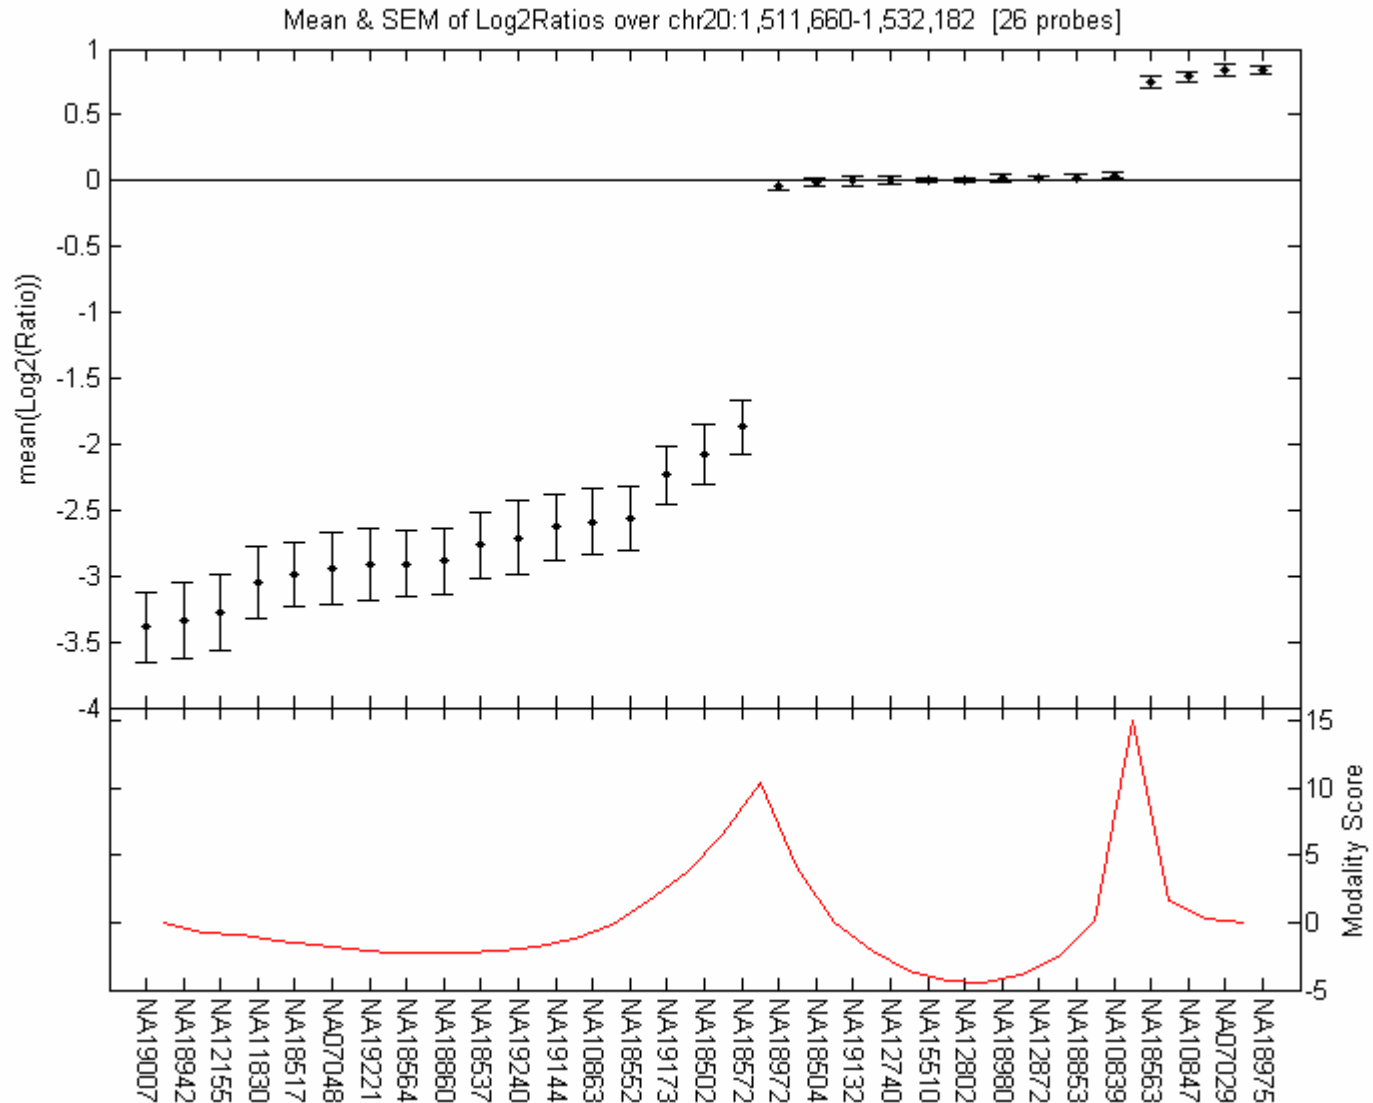

chr20:15,249,909-15,251,287 Score=13.8068

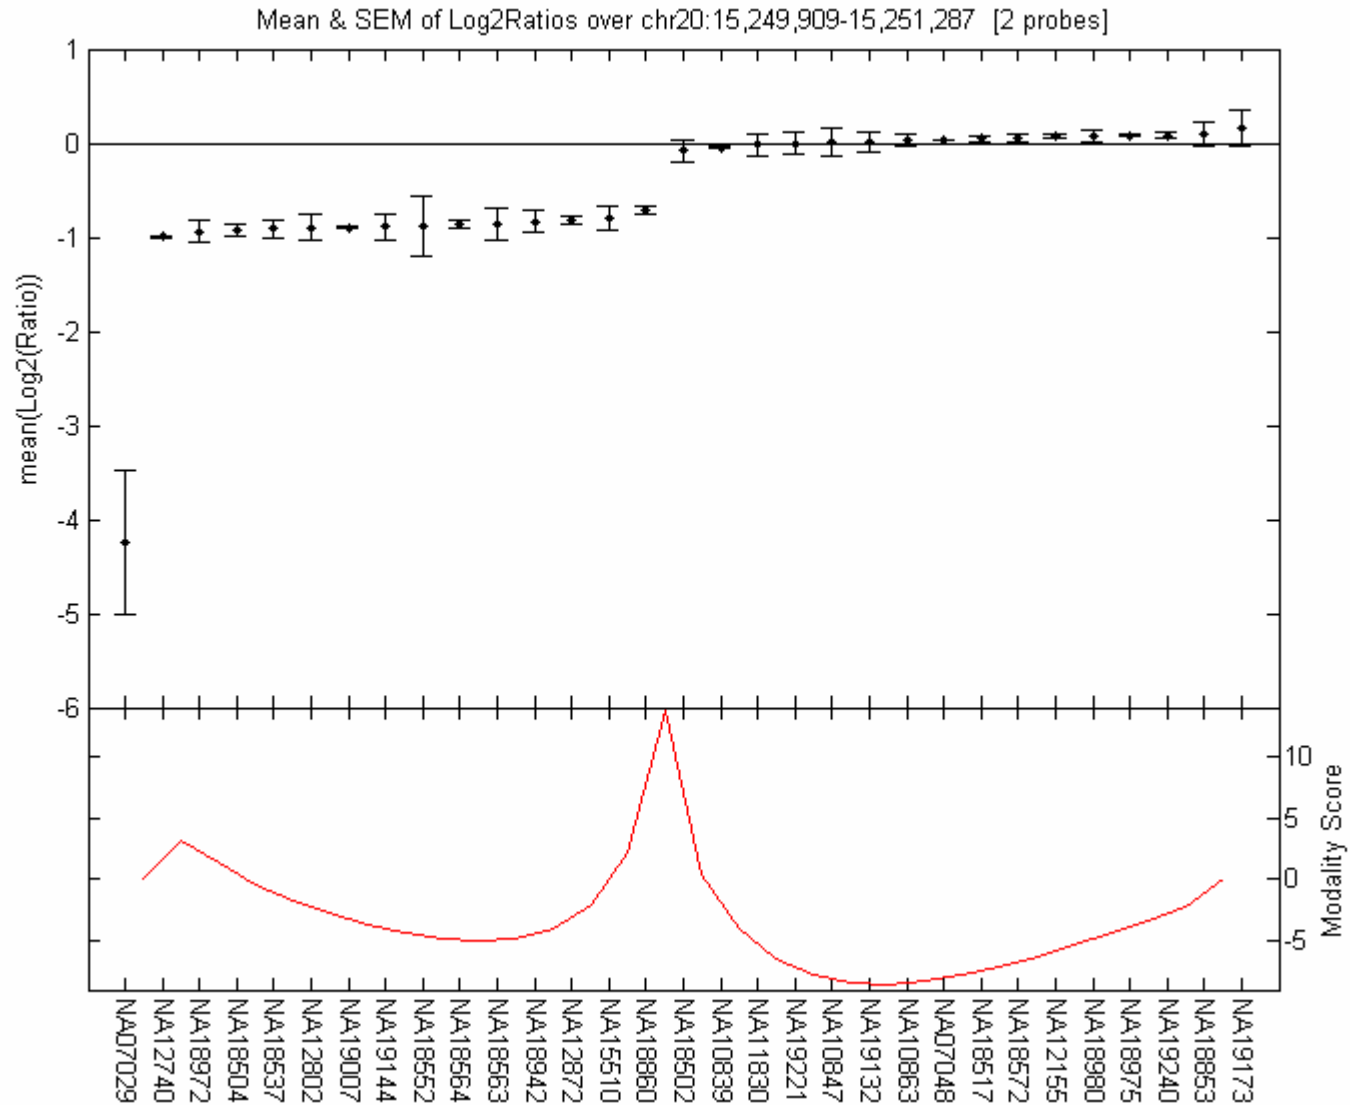

chr20:22,274,448-22,277,490 Score=19.9022

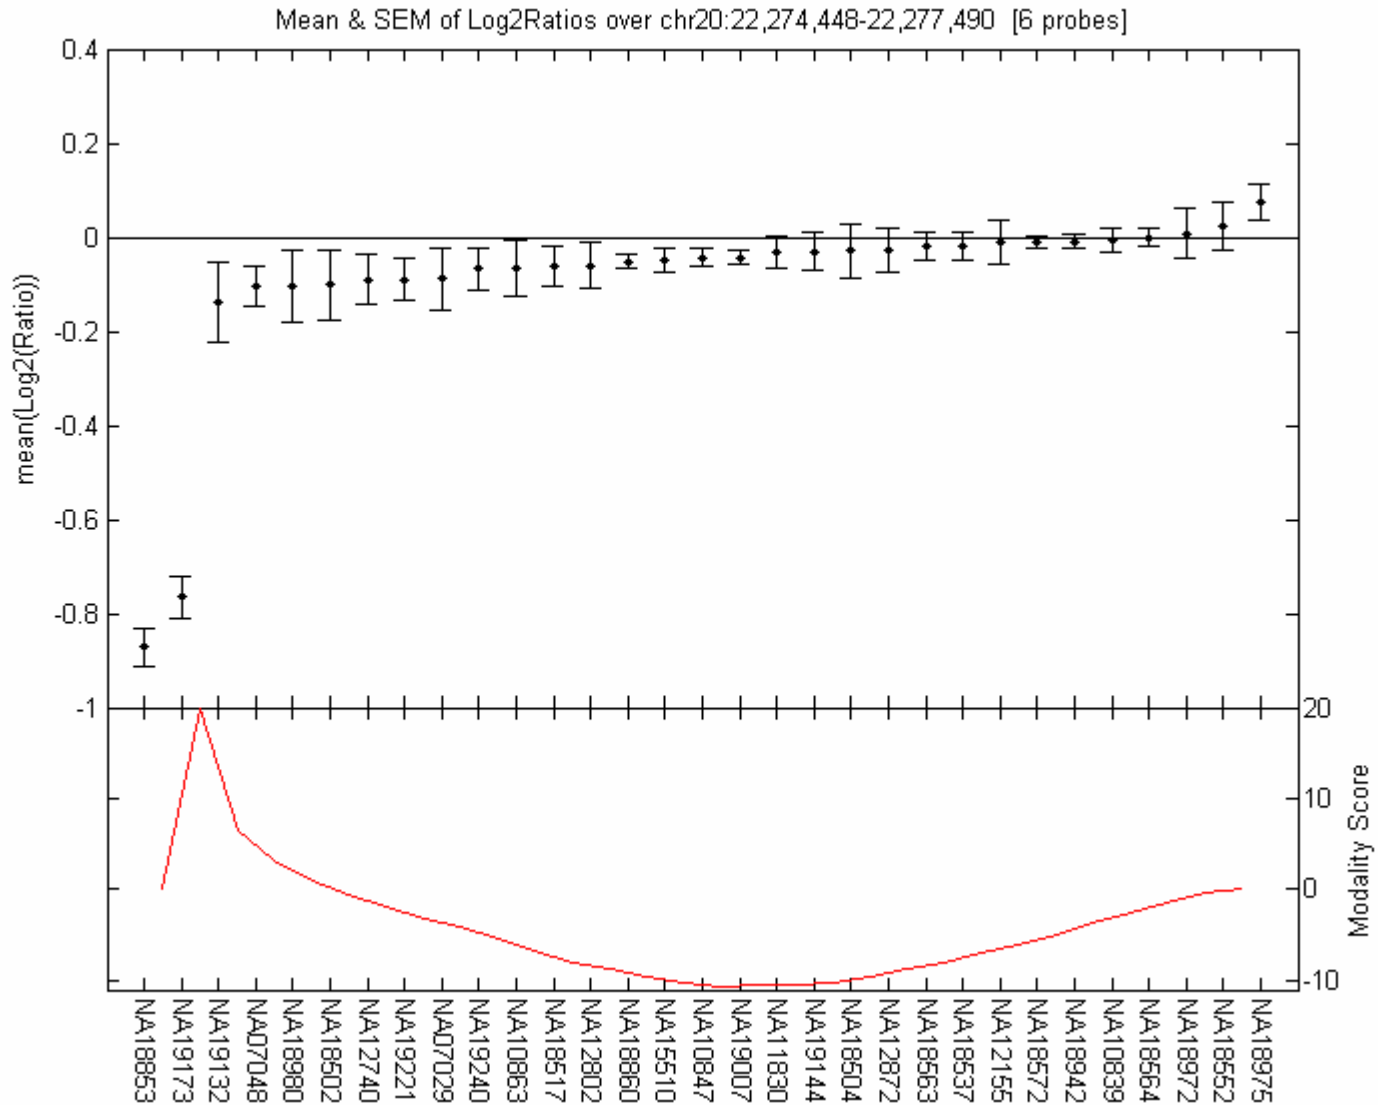



chr21:13,739,027-13,739,487 Score=7.8103

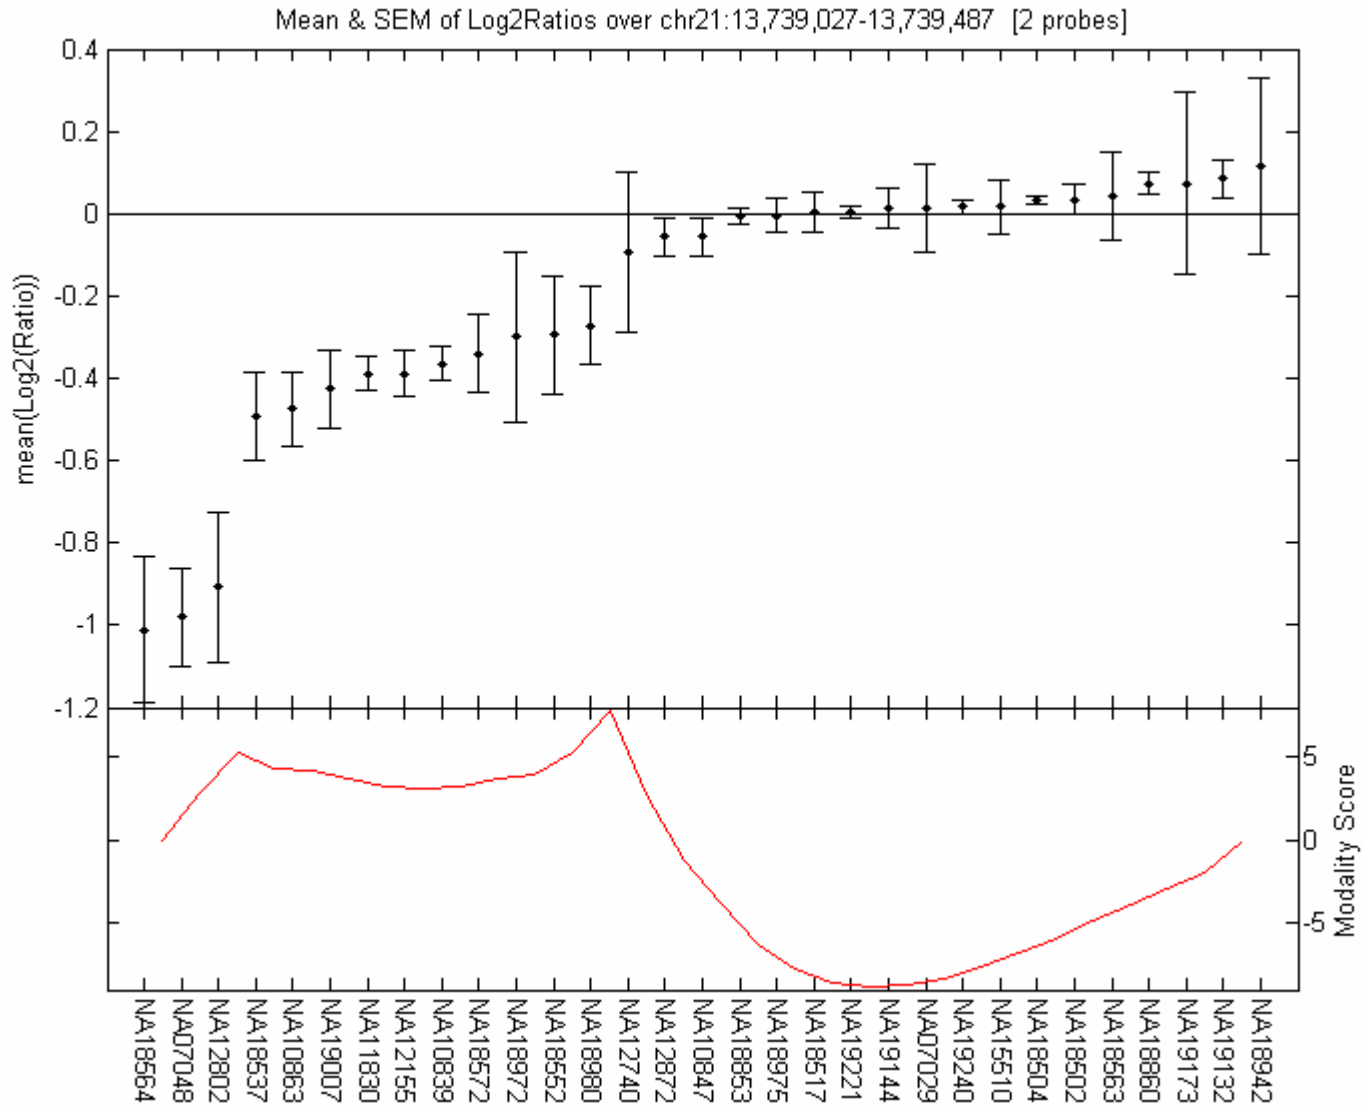

chr21:22,109,081-22,109,454 Score=7.6475

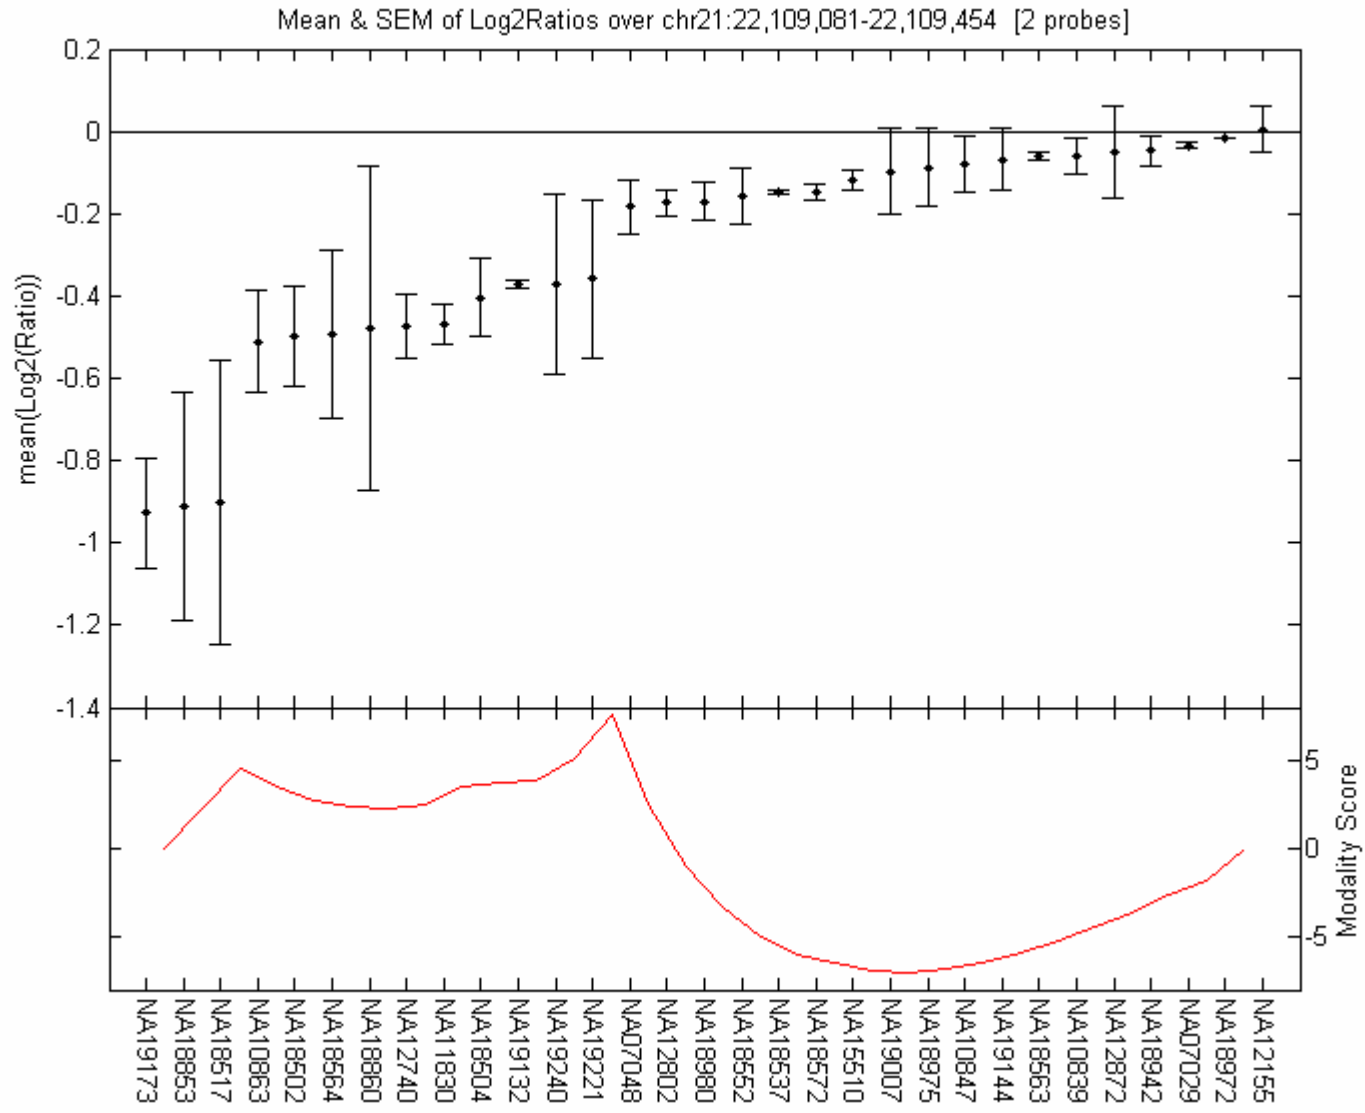

chr22:37,618,728-37,621,331 Score=15.7313

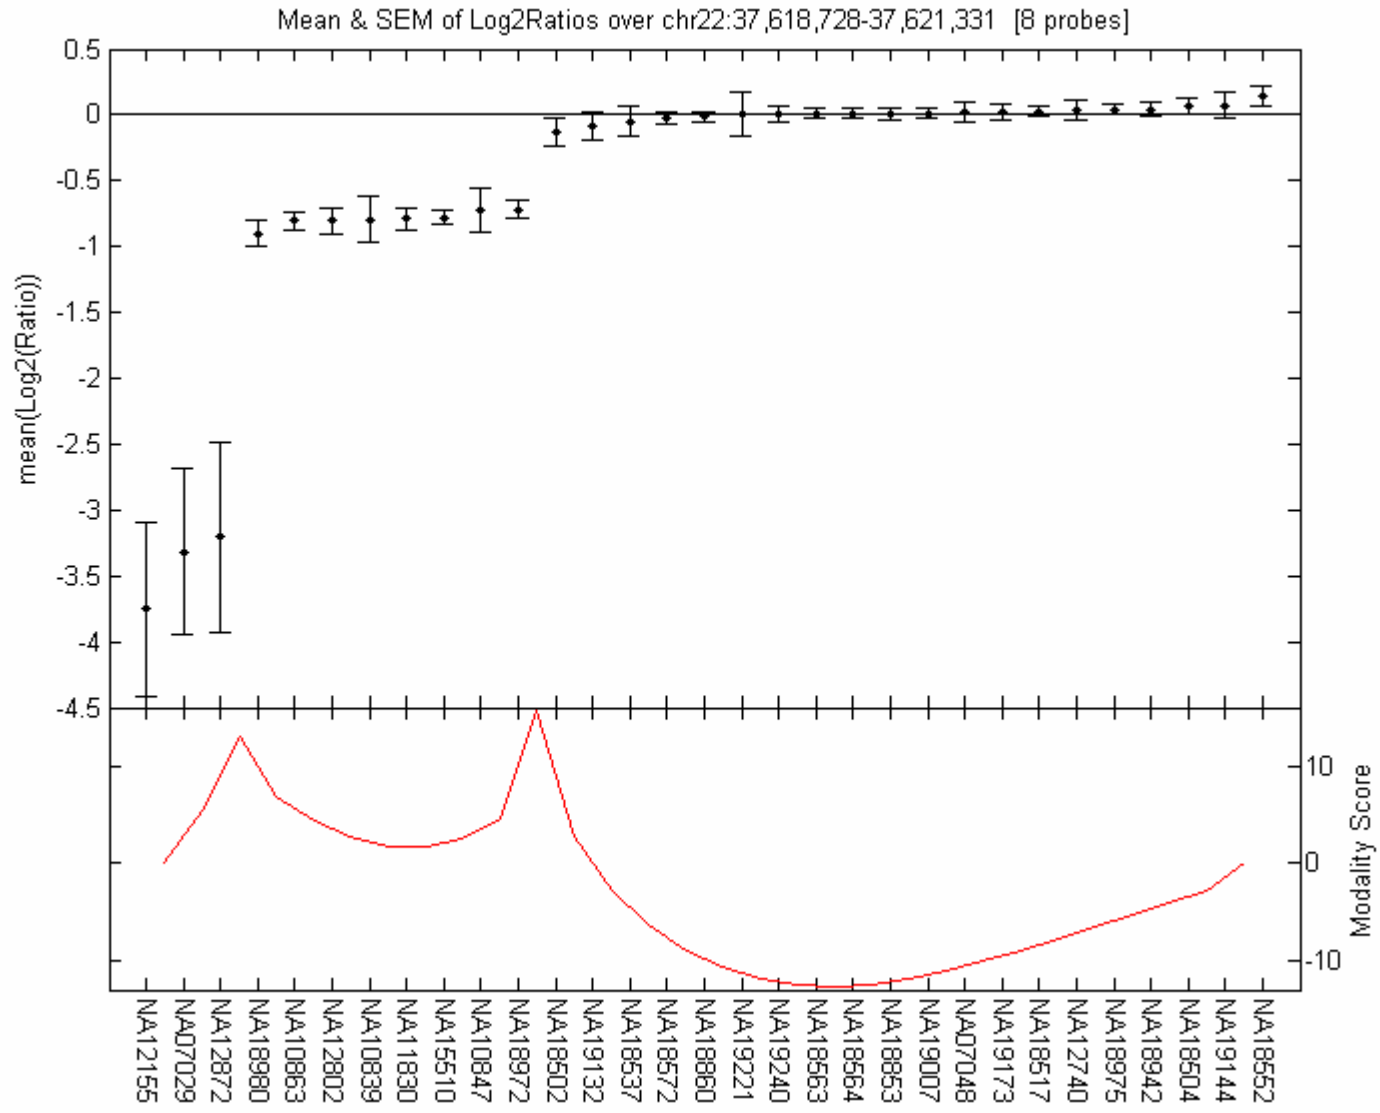

chr22:43,455,954-43,457,346 Score=15.8668

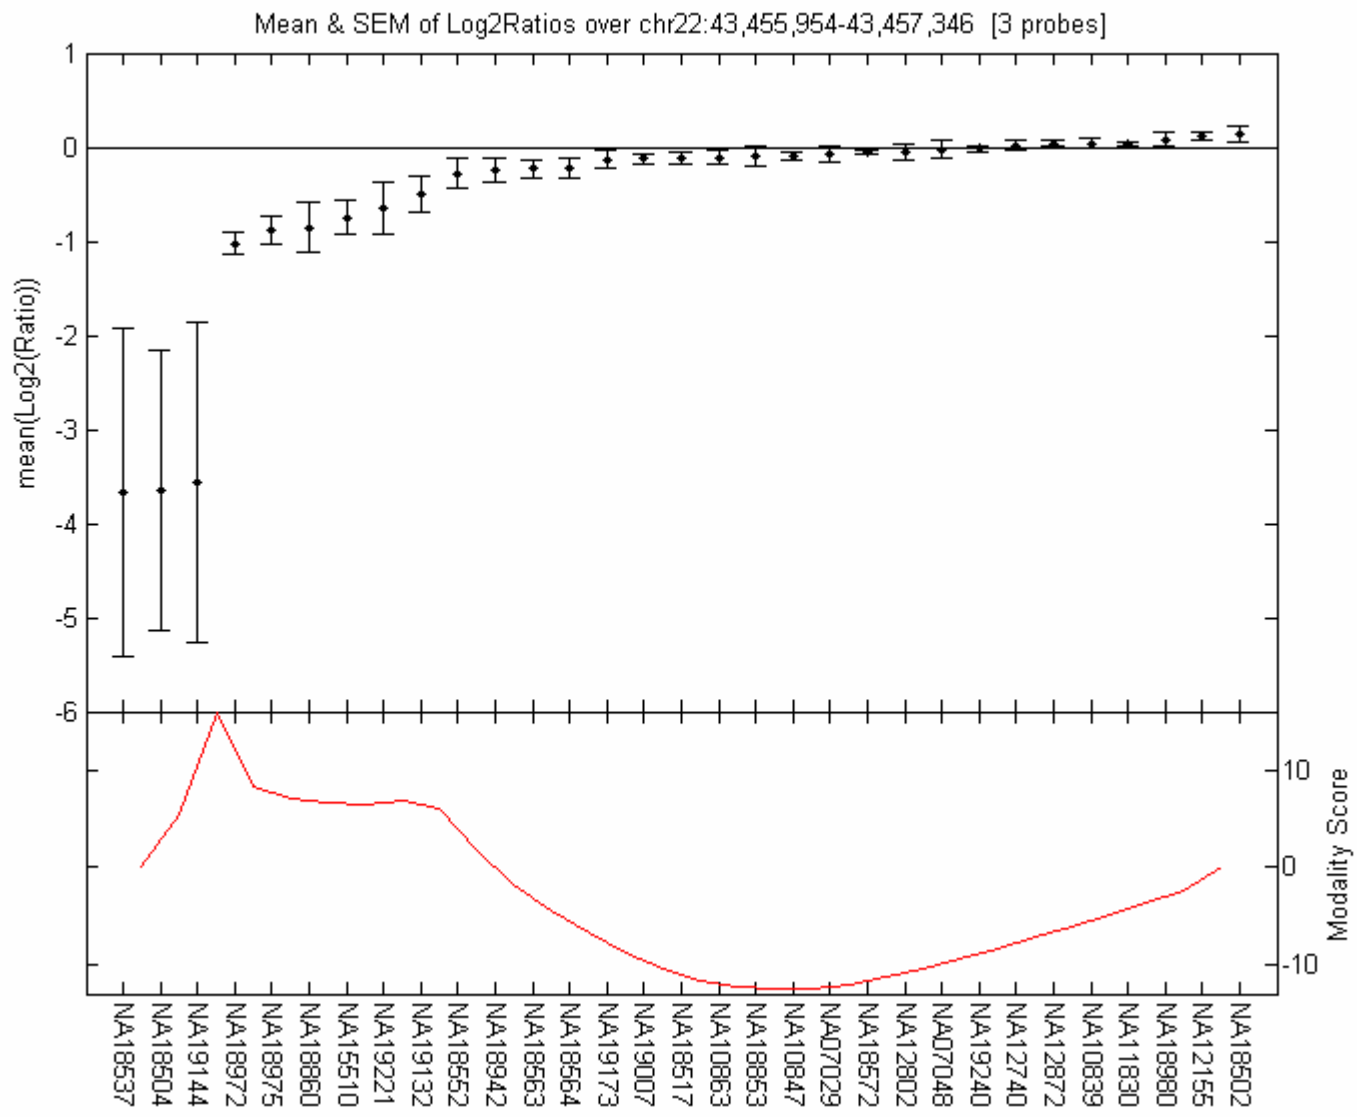

Supplement: mmc2.pdf [file mmc2.pdf]
