# Supplementary material
Source: PubMed Central journal article supplement (PMC2661628)

# Legend for Heatmap Figures

- outliers**  
(gray pixels)
- Saturated
  - non-uniform
  - dye bias outlier

chr2:242635966-24277538

Sample variation calls  
(ADM-2)

-- gain --loss

Sample ID's

NA1  
NA2  
NA3  
NA4  
NA5  
NA6  
NA7  
NA8  
NA9  
NA10  
NA11  
NA12  
NA13  
NA14  
NA15  
NA16  
NA17  
NA18  
NA19  
NA20  
NA21  
NA22  
NA23  
NA24  
NA25  
NA26  
NA27  
NA28  
NA29  
NA30  
NA31  
NA32  
NA33  
NA34  
NA35  
NA36  
NA37  
NA38  
NA39  
NA40  
NA41  
NA42  
NA43  
NA44  
NA45  
NA46  
NA47  
NA48  
NA49  
NA50  
NA51  
NA52  
NA53  
NA54  
NA55  
NA56  
NA57  
NA58  
NA59  
NA60  
NA61  
NA62  
NA63  
NA64  
NA65  
NA66  
NA67  
NA68  
NA69  
NA70  
NA71  
NA72  
NA73  
NA74  
NA75  
NA76  
NA77  
NA78  
NA79  
NA80  
NA81  
NA82  
NA83  
NA84  
NA85  
NA86  
NA87  
NA88  
NA89  
NA90  
NA91  
NA92  
NA93  
NA94  
NA95  
NA96  
NA97  
NA98  
NA99  
NA100  
NA101  
NA102  
NA103  
NA104  
NA105  
NA106  
NA107  
NA108  
NA109  
NA110  
NA111  
NA112  
NA113  
NA114  
NA115  
NA116  
NA117  
NA118  
NA119  
NA120  
NA121  
NA122  
NA123  
NA124  
NA125  
NA126  
NA127  
NA128  
NA129  
NA130  
NA131  
NA132  
NA133  
NA134  
NA135  
NA136  
NA137  
NA138  
NA139  
NA140  
NA141  
NA142  
NA143  
NA144  
NA145  
NA146  
NA147  
NA148  
NA149  
NA150  
NA151  
NA152  
NA153  
NA154  
NA155  
NA156  
NA157  
NA158  
NA159  
NA160  
NA161  
NA162  
NA163  
NA164  
NA165  
NA166  
NA167  
NA168  
NA169  
NA170  
NA171  
NA172  
NA173  
NA174  
NA175  
NA176  
NA177  
NA178  
NA179  
NA180  
NA181  
NA182  
NA183  
NA184  
NA185  
NA186  
NA187  
NA188  
NA189  
NA190  
NA191  
NA192  
NA193  
NA194  
NA195  
NA196  
NA197  
NA198  
NA199  
NA200  
NA201  
NA202  
NA203  
NA204  
NA205  
NA206  
NA207  
NA208  
NA209  
NA210  
NA211  
NA212  
NA213  
NA214  
NA215  
NA216  
NA217  
NA218  
NA219  
NA220  
NA221  
NA222  
NA223  
NA224  
NA225  
NA226  
NA227  
NA228  
NA229  
NA230  
NA231  
NA232  
NA233  
NA234  
NA235  
NA236  
NA237  
NA238  
NA239  
NA240  
NA241  
NA242  
NA243  
NA244  
NA245  
NA246  
NA247  
NA248  
NA249  
NA250  
NA251  
NA252  
NA253  
NA254  
NA255  
NA256  
NA257  
NA258  
NA259  
NA260  
NA261  
NA262  
NA263  
NA264  
NA265  
NA266  
NA267  
NA268  
NA269  
NA270  
NA271  
NA272  
NA273  
NA274  
NA275  
NA276  
NA277  
NA278  
NA279  
NA280  
NA281  
NA282  
NA283  
NA284  
NA285  
NA286  
NA287  
NA288  
NA289  
NA290  
NA291  
NA292  
NA293  
NA294  
NA295  
NA296  
NA297  
NA298  
NA299  
NA300  
NA301  
NA302  
NA303  
NA304  
NA305  
NA306  
NA307  
NA308  
NA309  
NA310  
NA311  
NA312  
NA313  
NA314  
NA315  
NA316  
NA317  
NA318  
NA319  
NA320  
NA321  
NA322  
NA323  
NA324  
NA325  
NA326  
NA327  
NA328  
NA329  
NA330  
NA331  
NA332  
NA333  
NA334  
NA335  
NA336  
NA337  
NA338  
NA339  
NA340  
NA341  
NA342  
NA343  
NA344  
NA345  
NA346  
NA347  
NA348  
NA349  
NA350  
NA351  
NA352  
NA353  
NA354  
NA355  
NA356  
NA357  
NA358  
NA359  
NA360  
NA361  
NA362  
NA363  
NA364  
NA365  
NA366  
NA367  
NA368  
NA369  
NA370  
NA371  
NA372  
NA373  
NA374  
NA375  
NA376  
NA377  
NA378  
NA379  
NA380  
NA381  
NA382  
NA383  
NA384  
NA385  
NA386  
NA387  
NA388  
NA389  
NA390  
NA391  
NA392  
NA393  
NA394  
NA395  
NA396  
NA397  
NA398  
NA399  
NA400  
NA401  
NA402  
NA403  
NA404  
NA405  
NA406  
NA407  
NA408  
NA409  
NA410  
NA411  
NA412  
NA413  
NA414  
NA415  
NA416  
NA417  
NA418  
NA419  
NA420  
NA421  
NA422  
NA423  
NA424  
NA425  
NA426  
NA427  
NA428  
NA429  
NA430  
NA431  
NA432  
NA433  
NA434  
NA435  
NA436  
NA437  
NA438  
NA439  
NA440  
NA441  
NA442  
NA443  
NA444  
NA445  
NA446  
NA447  
NA448  
NA449  
NA450  
NA451  
NA452  
NA453  
NA454  
NA455  
NA456  
NA457  
NA458  
NA459  
NA460  
NA461  
NA462  
NA463  
NA464  
NA465  
NA466  
NA467  
NA468  
NA469  
NA470  
NA471  
NA472  
NA473  
NA474  
NA475  
NA476  
NA477  
NA478  
NA479  
NA480  
NA481  
NA482  
NA483  
NA484  
NA485  
NA486  
NA487  
NA488  
NA489  
NA490  
NA491  
NA492  
NA493  
NA494  
NA495  
NA496  
NA497  
NA498  
NA499  
NA500  
NA501  
NA502

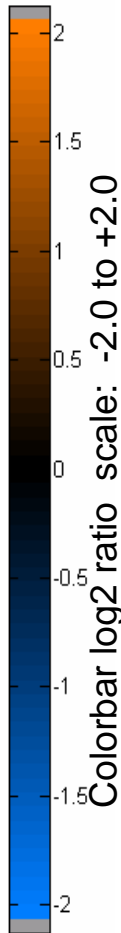

Median signal intensity (log<sub>2</sub>)  
-- all samples  
-- reference (in foreground)

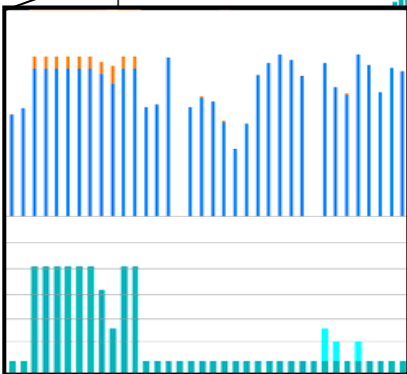

Probe # of Perfect-Match BLAST Hits  
-- On-chrom  
-- Off-chrom

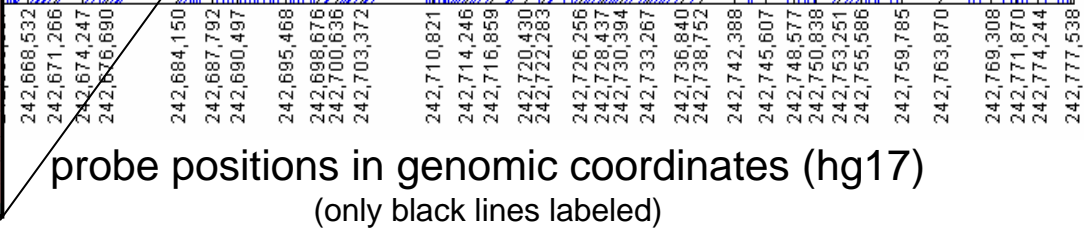

# chr1:000240482-000688725

chr1:000240482-000688725

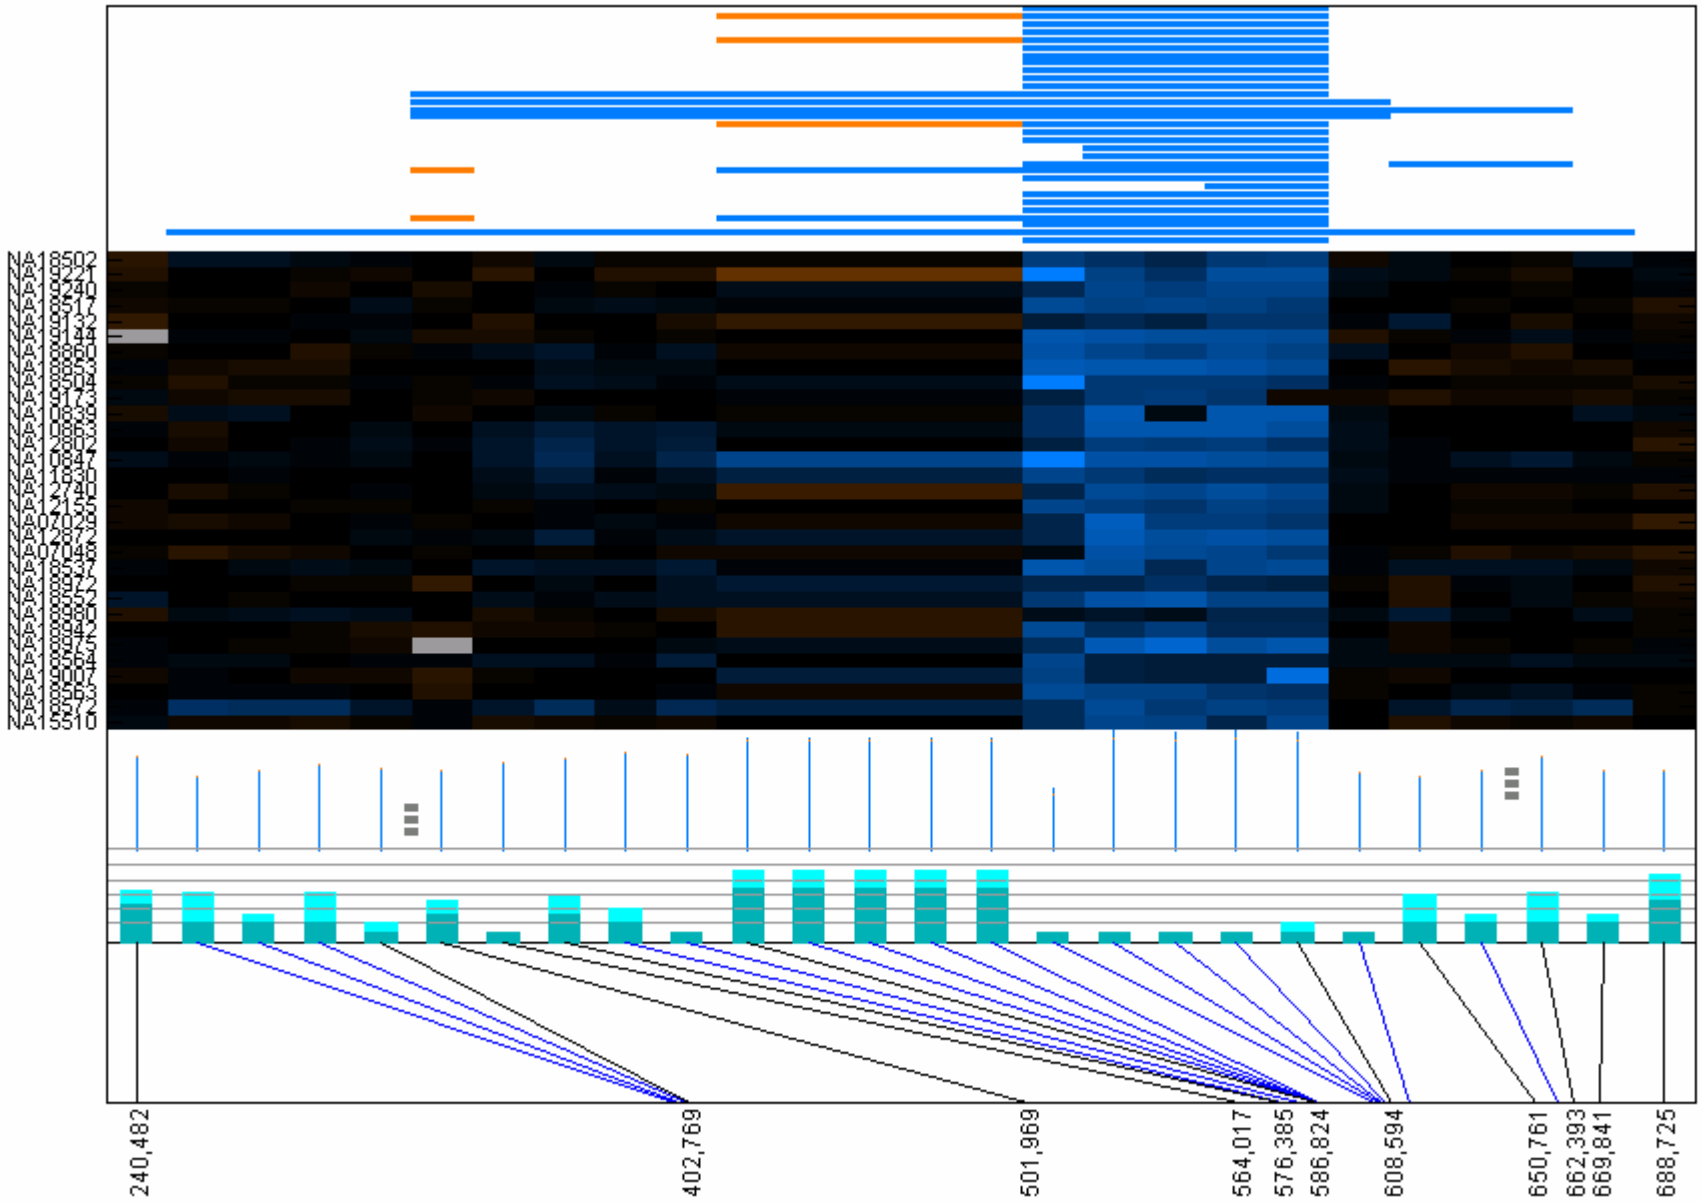

# chr1:000750738-000890729

chr1:000750738-000890729

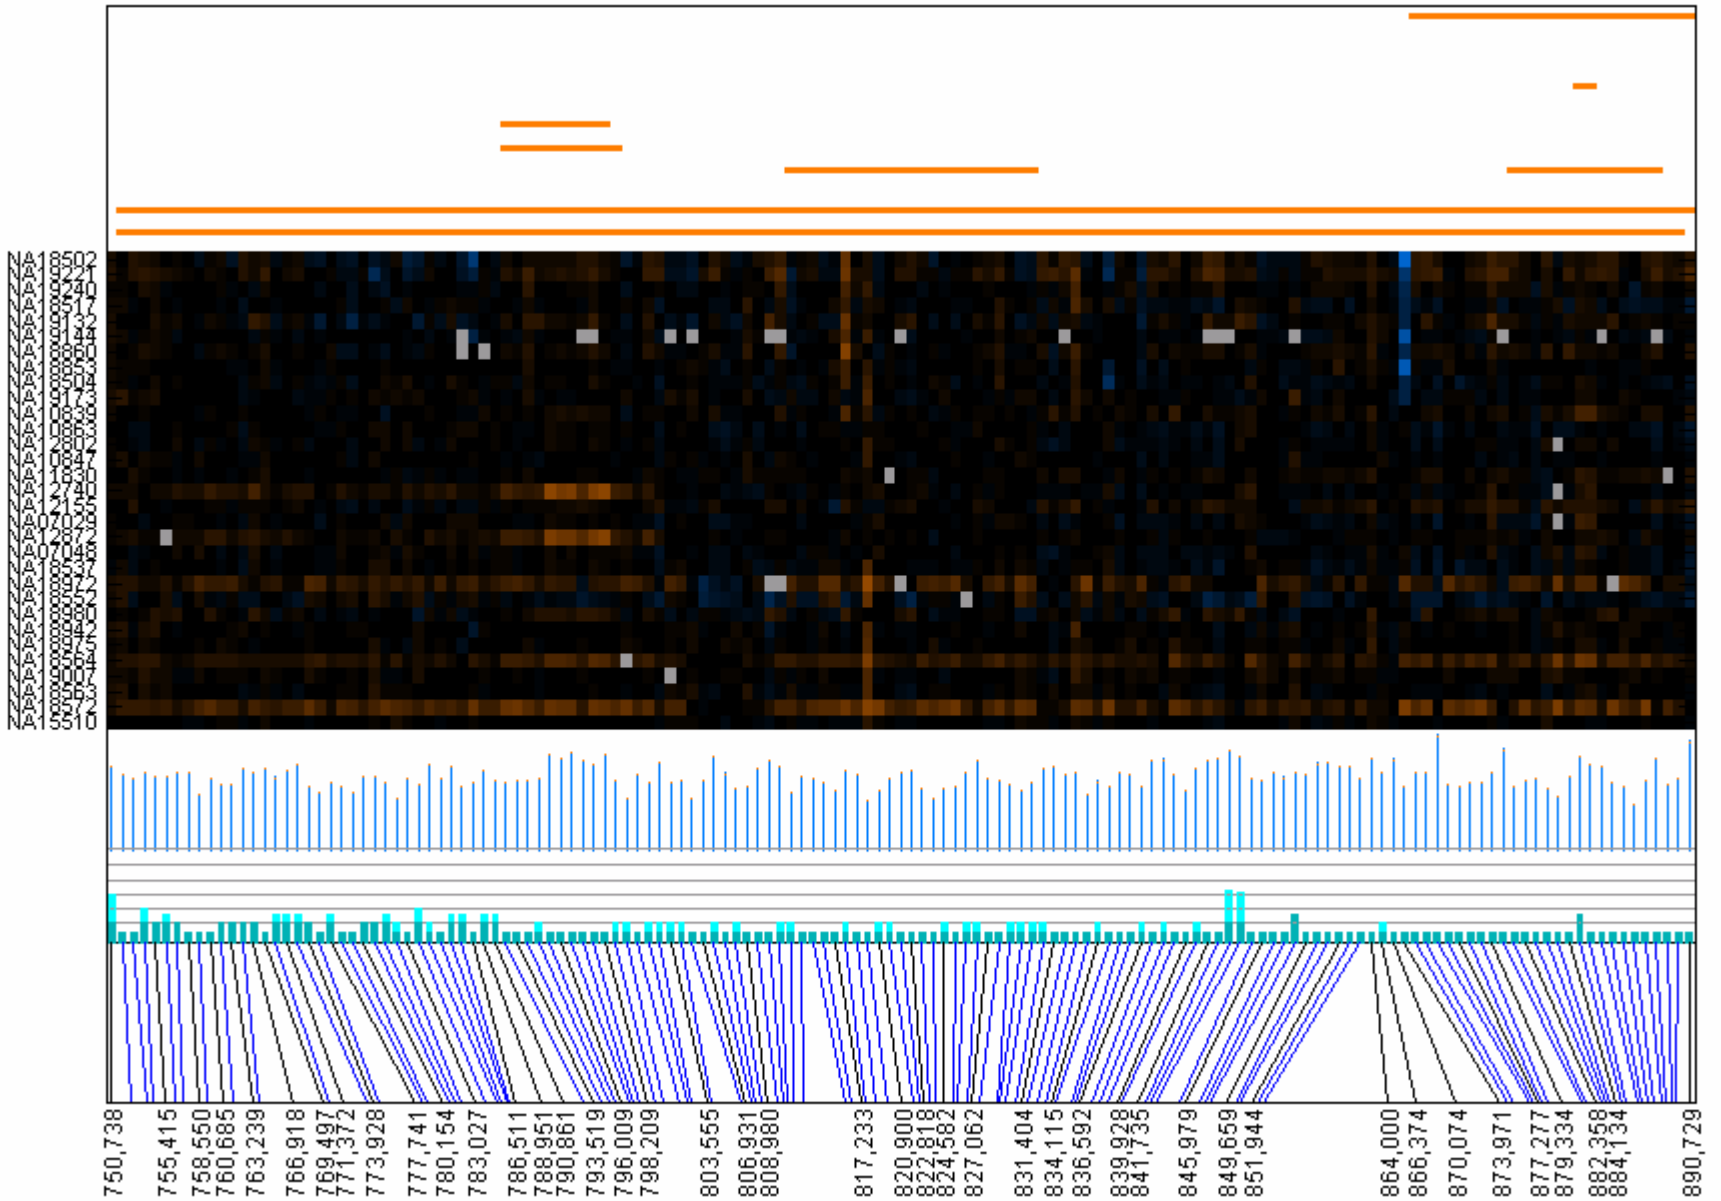

# chr1:012781210-013262403

chr1:012781210-013262403

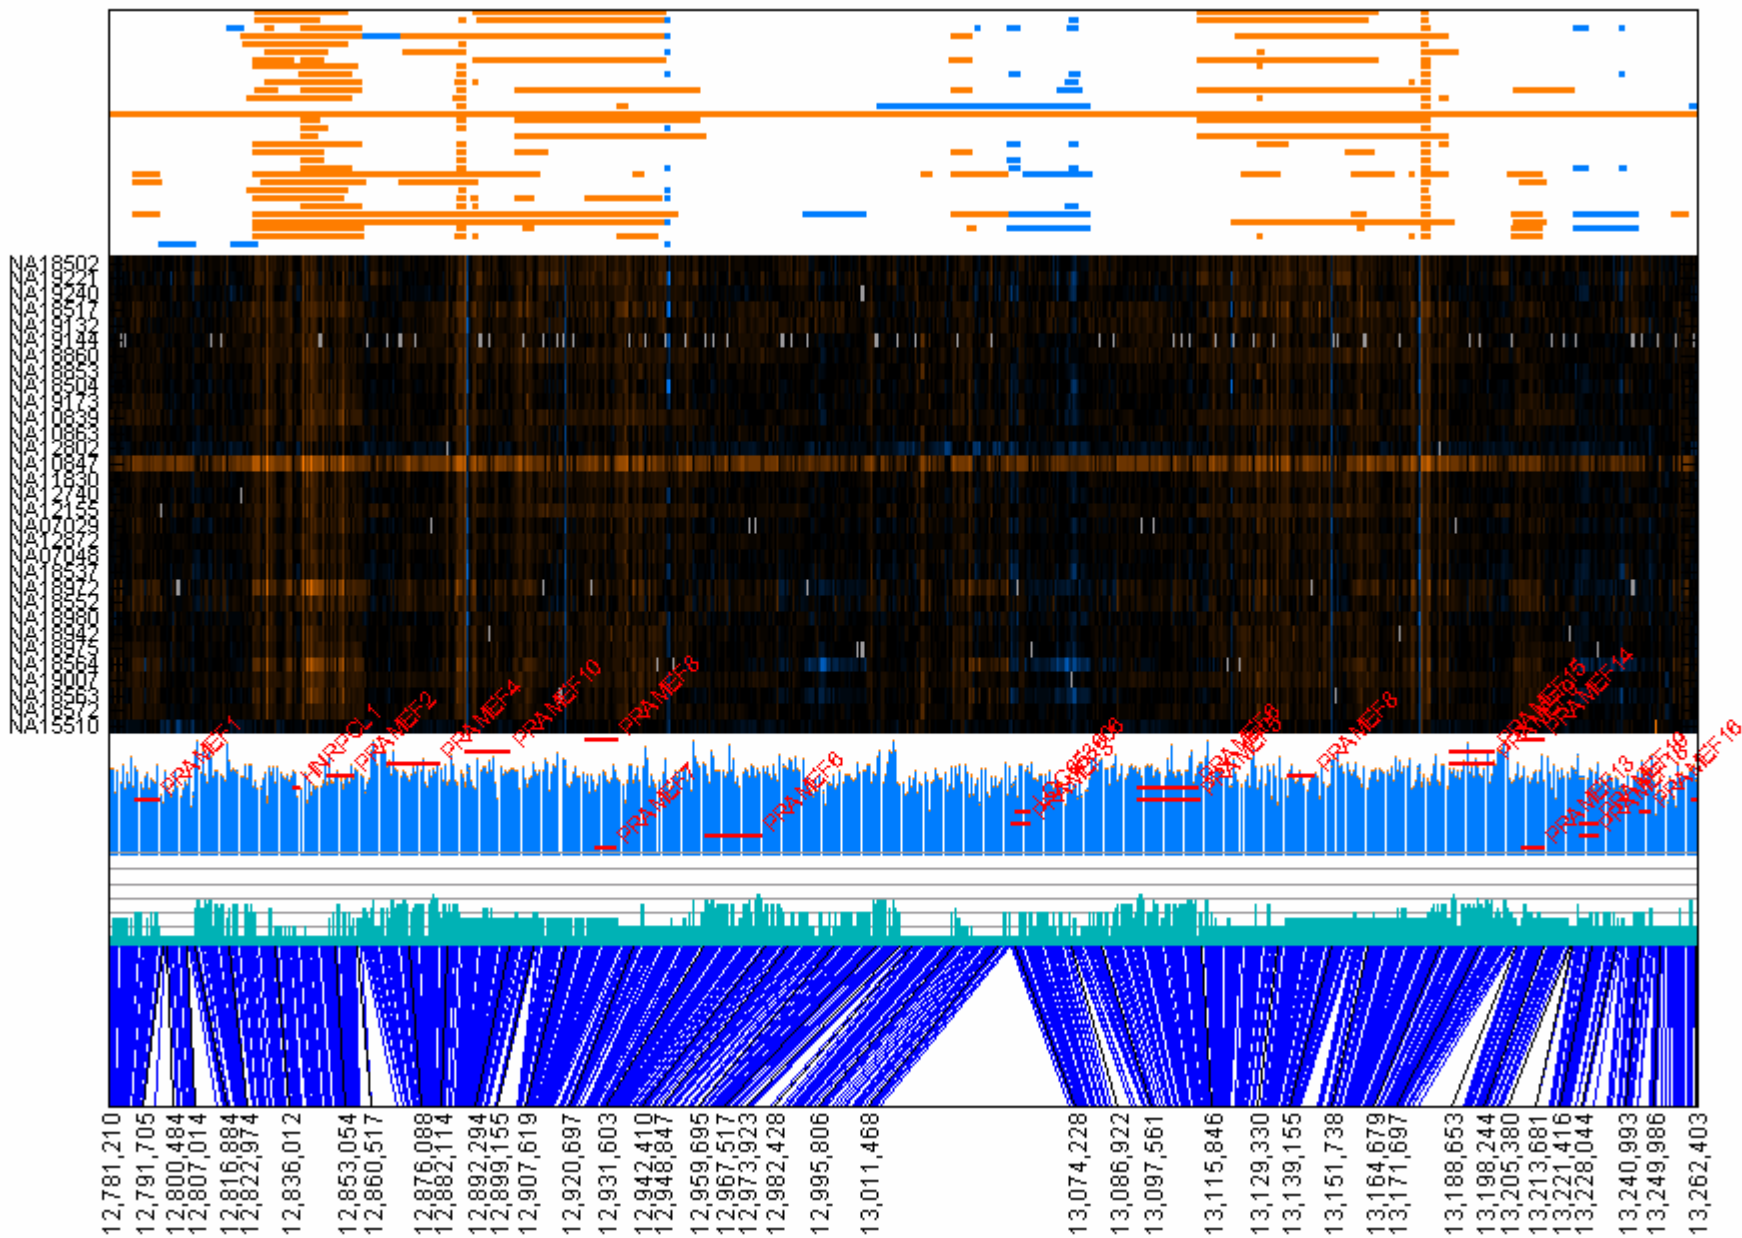

# chr1:013293362-013494542

chr1:013293362-013494542

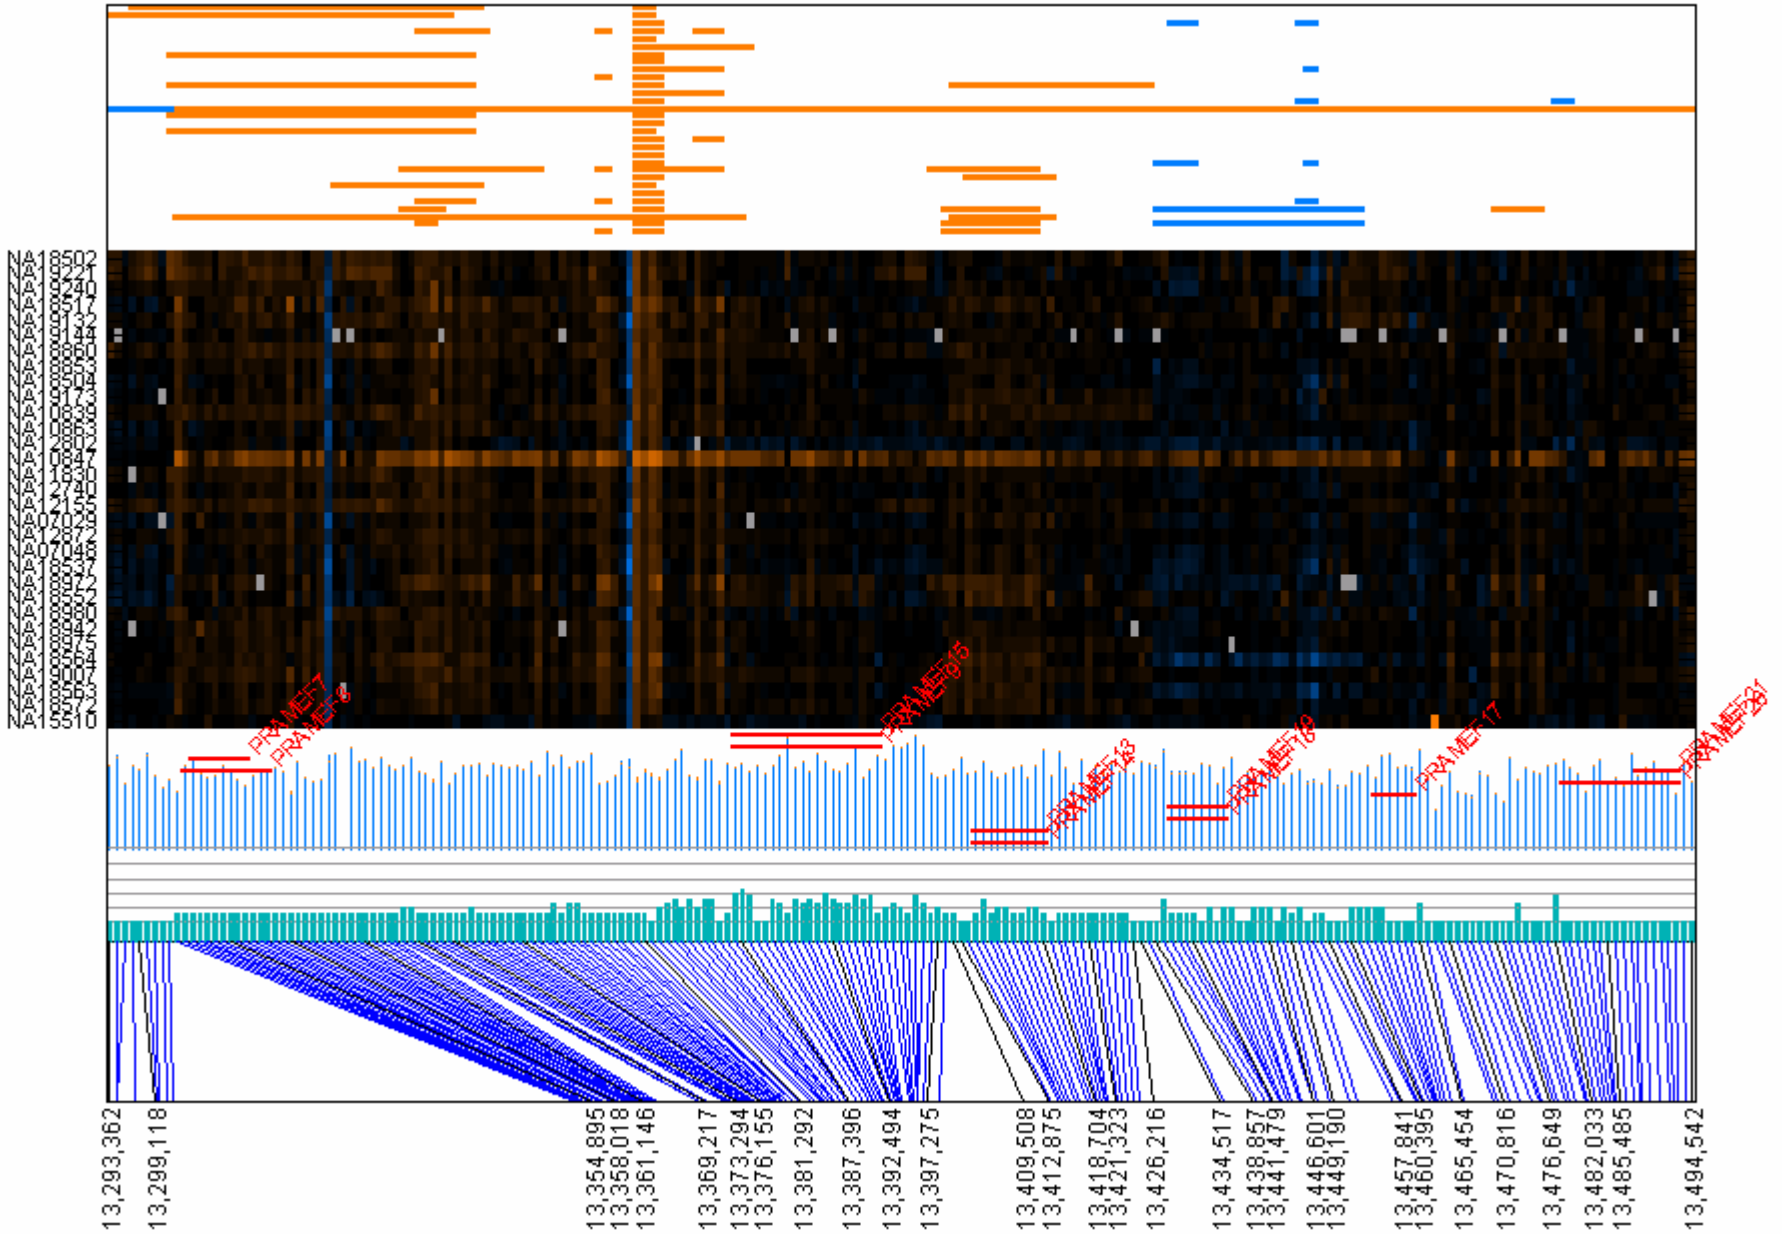

# chr1:016545973-017025840

chr1:016545973-017025840

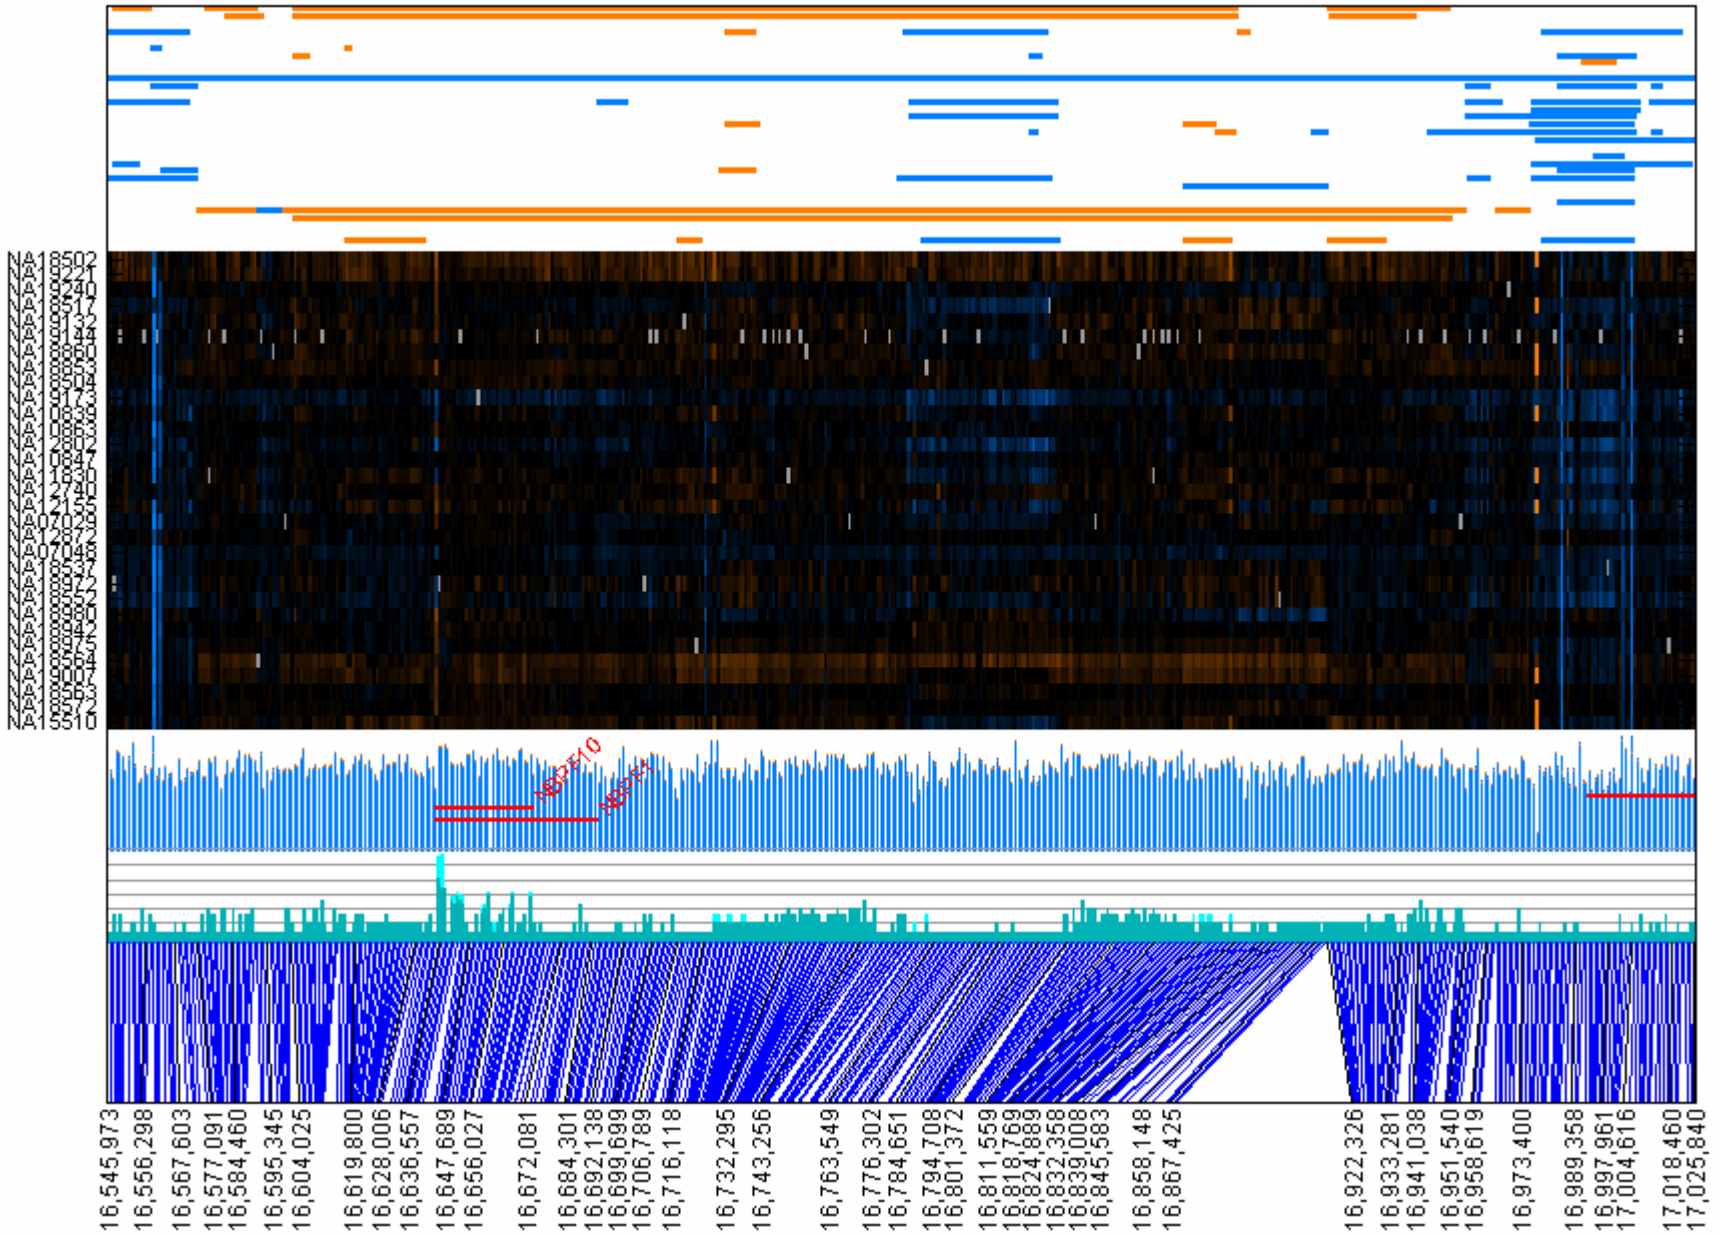



# chr1:142680244-142871776

chr1:142680244-142871776

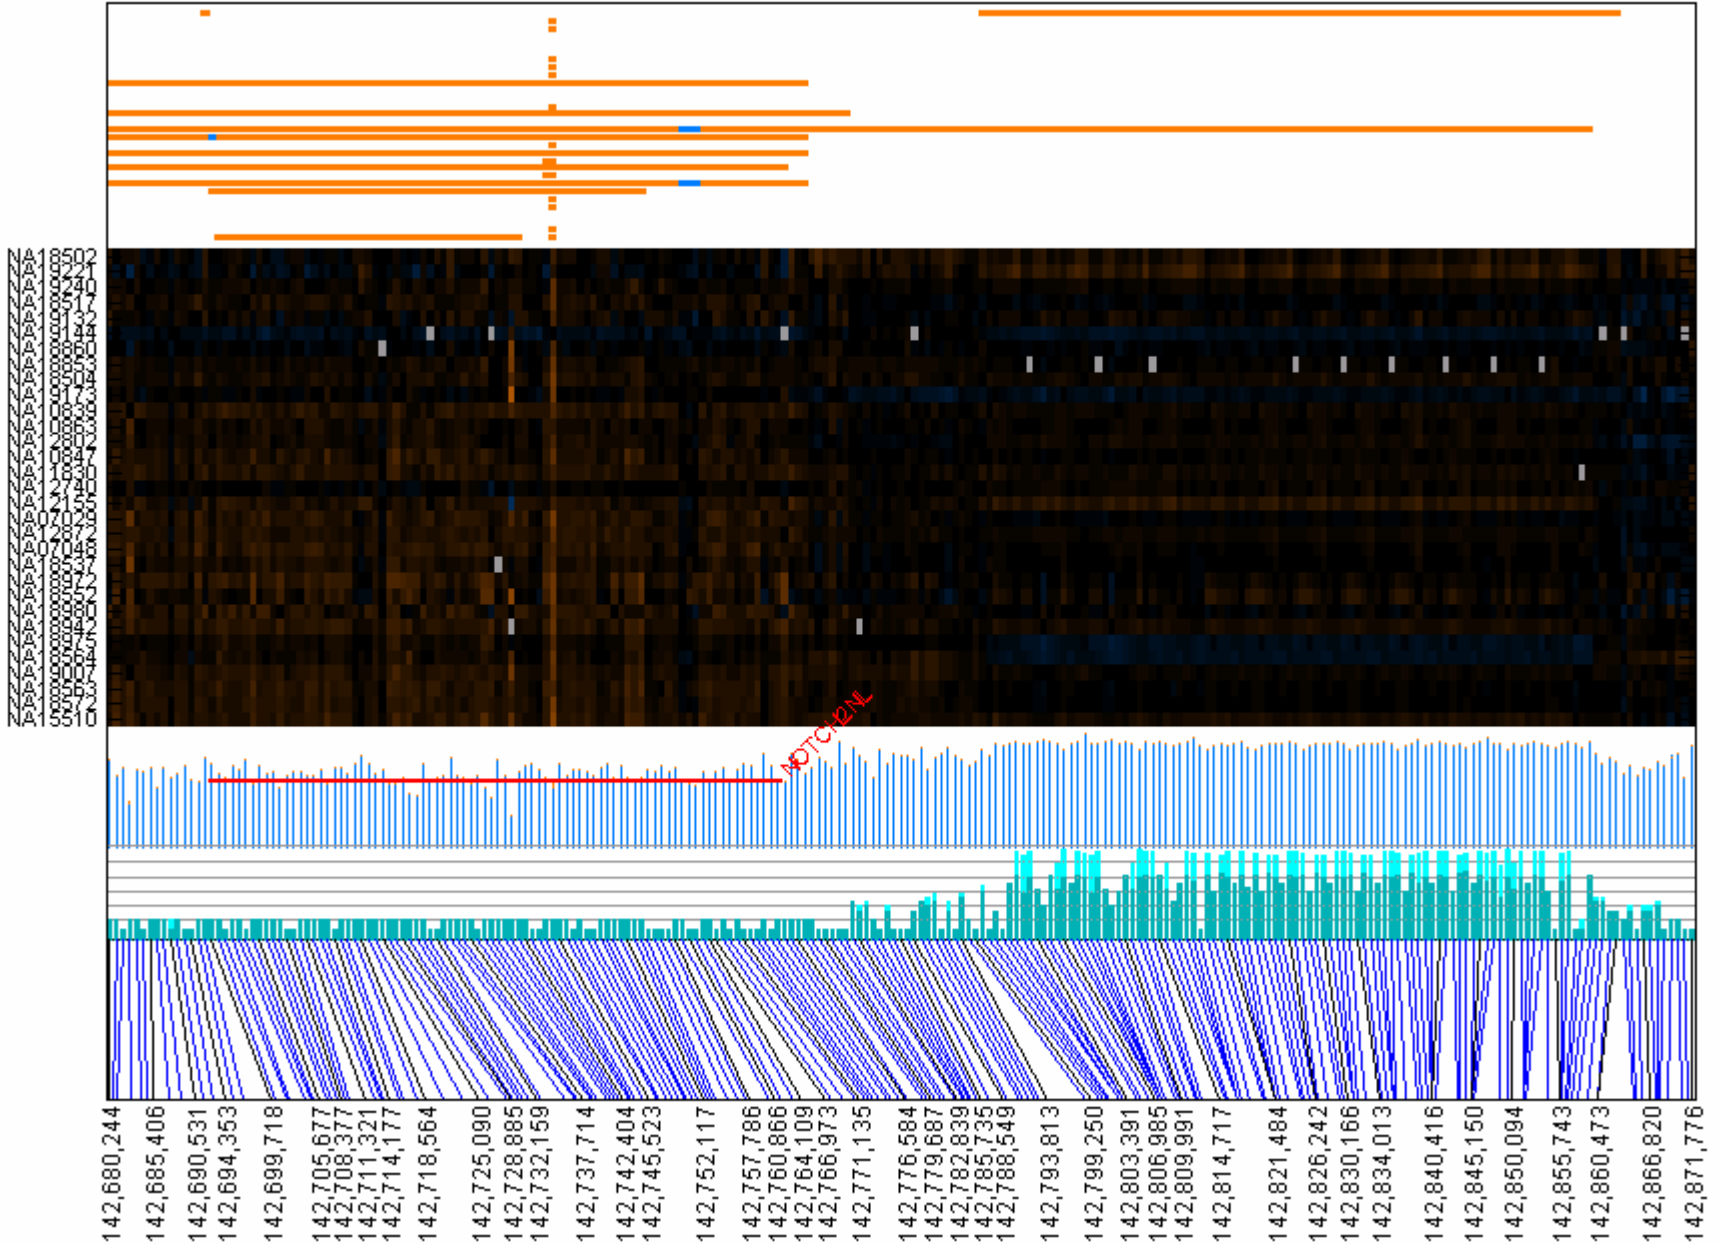



# chr1:158224584-158264771

chr1:158224584-158264771

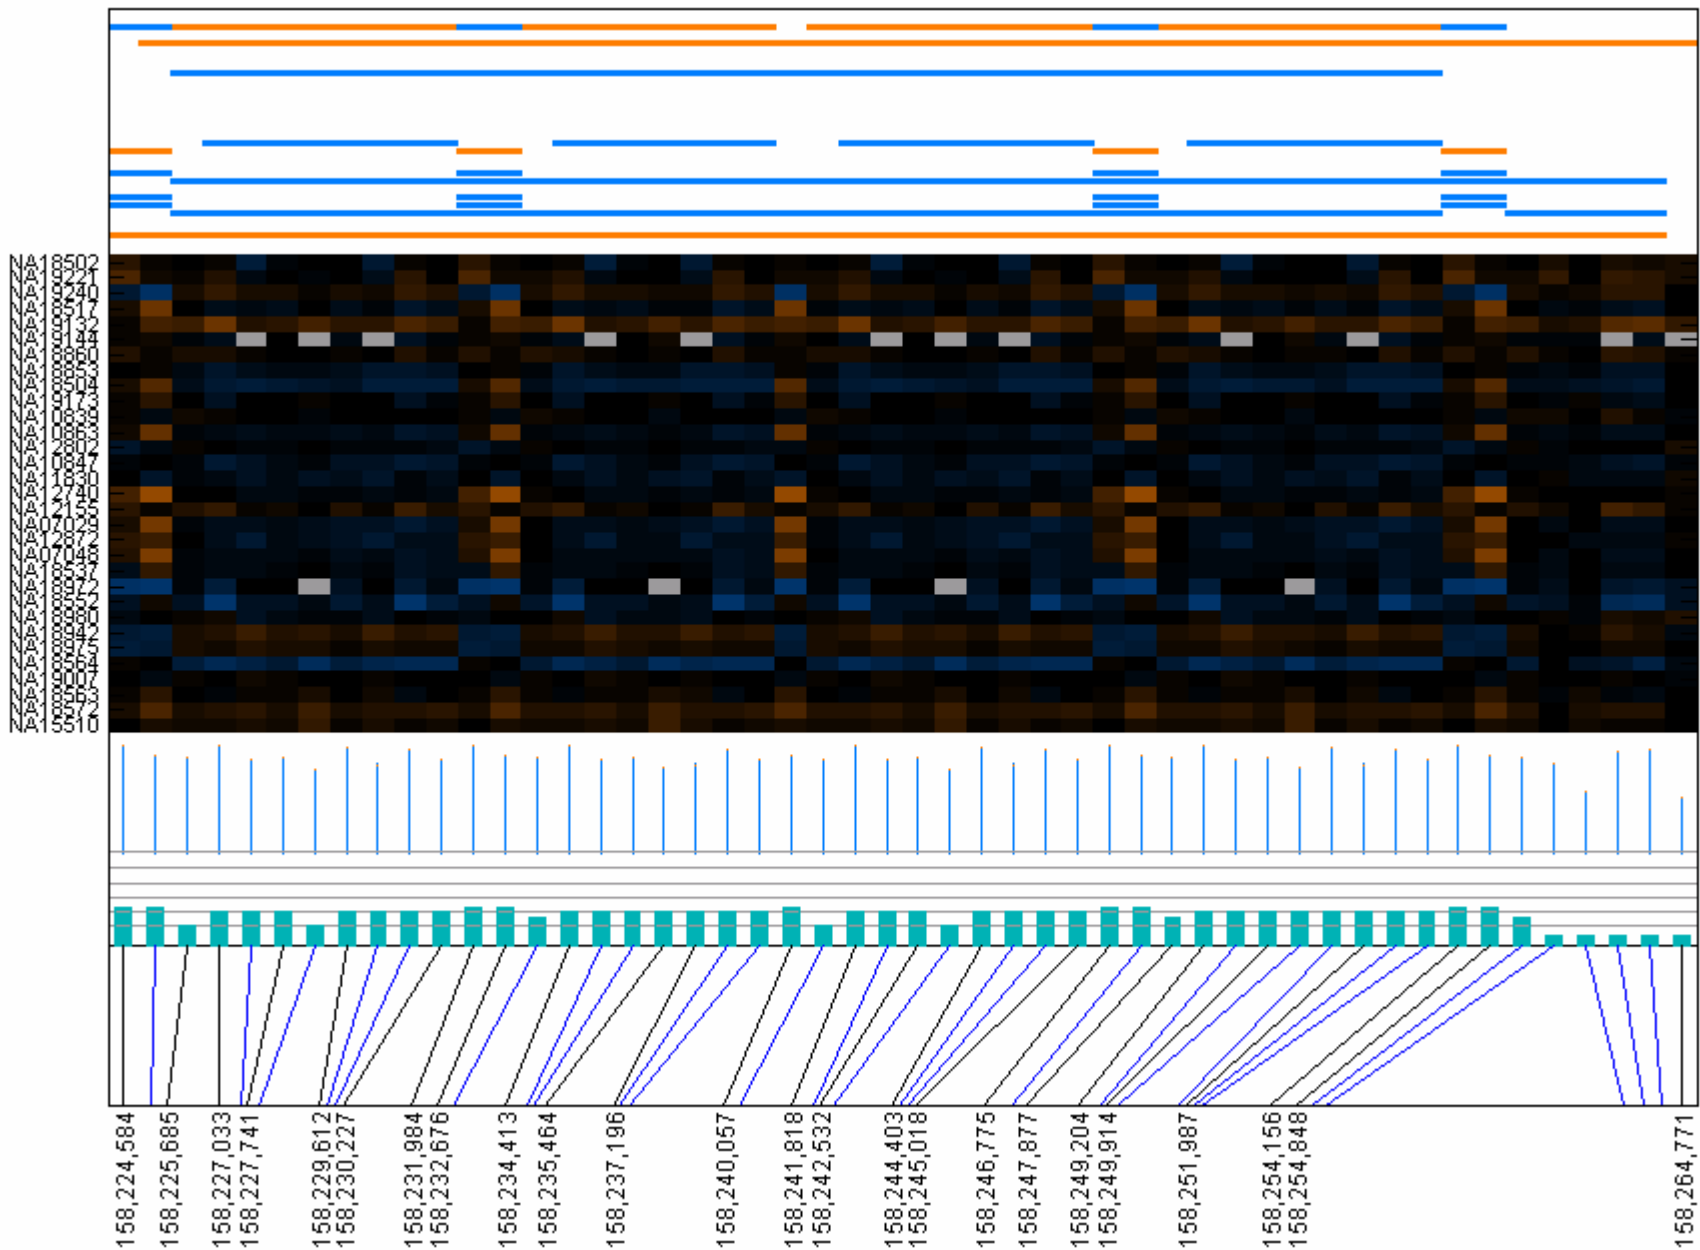

# chr1:193442791-193660011

chr1:193442791-193660011

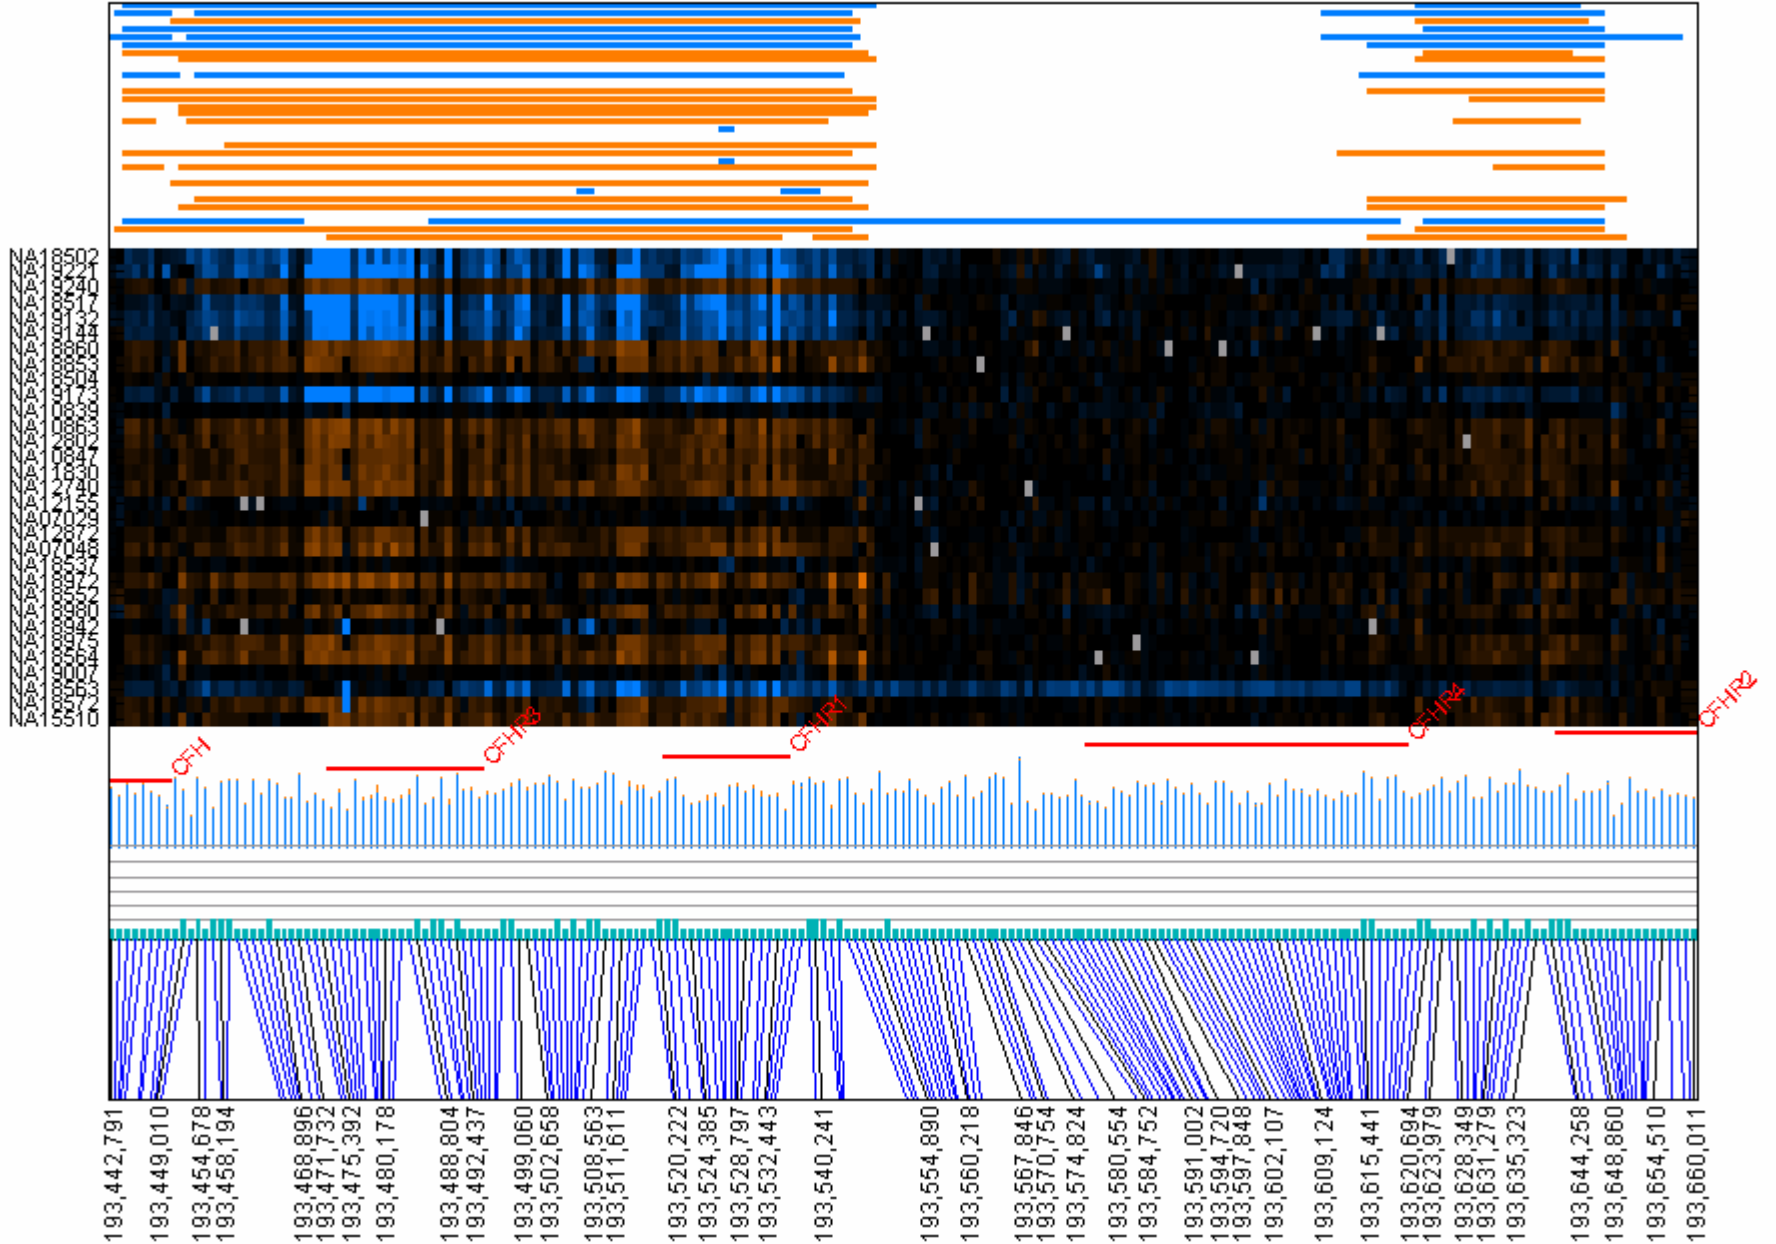

# chr2:000305360-000846457

chr2:000305360-000846457

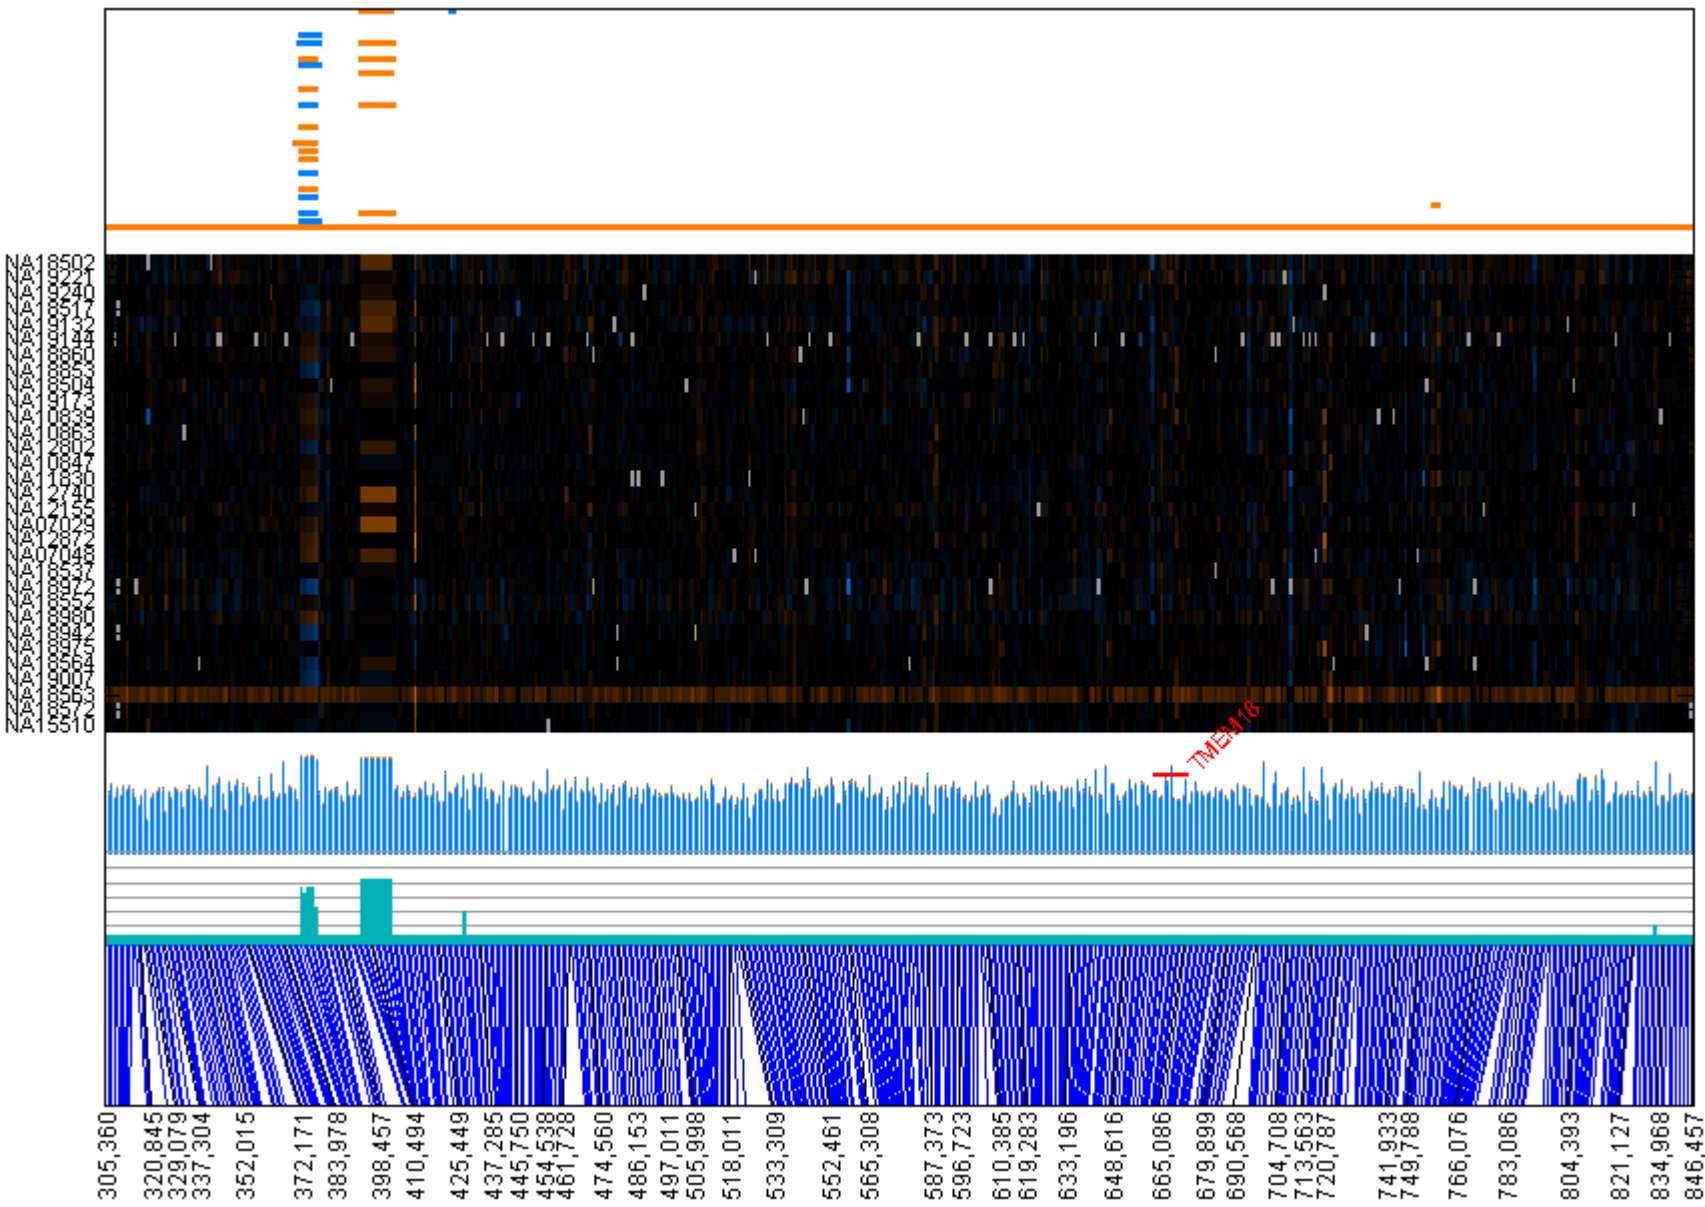

# chr2:046580284-046651822

chr2:046580284-046651822

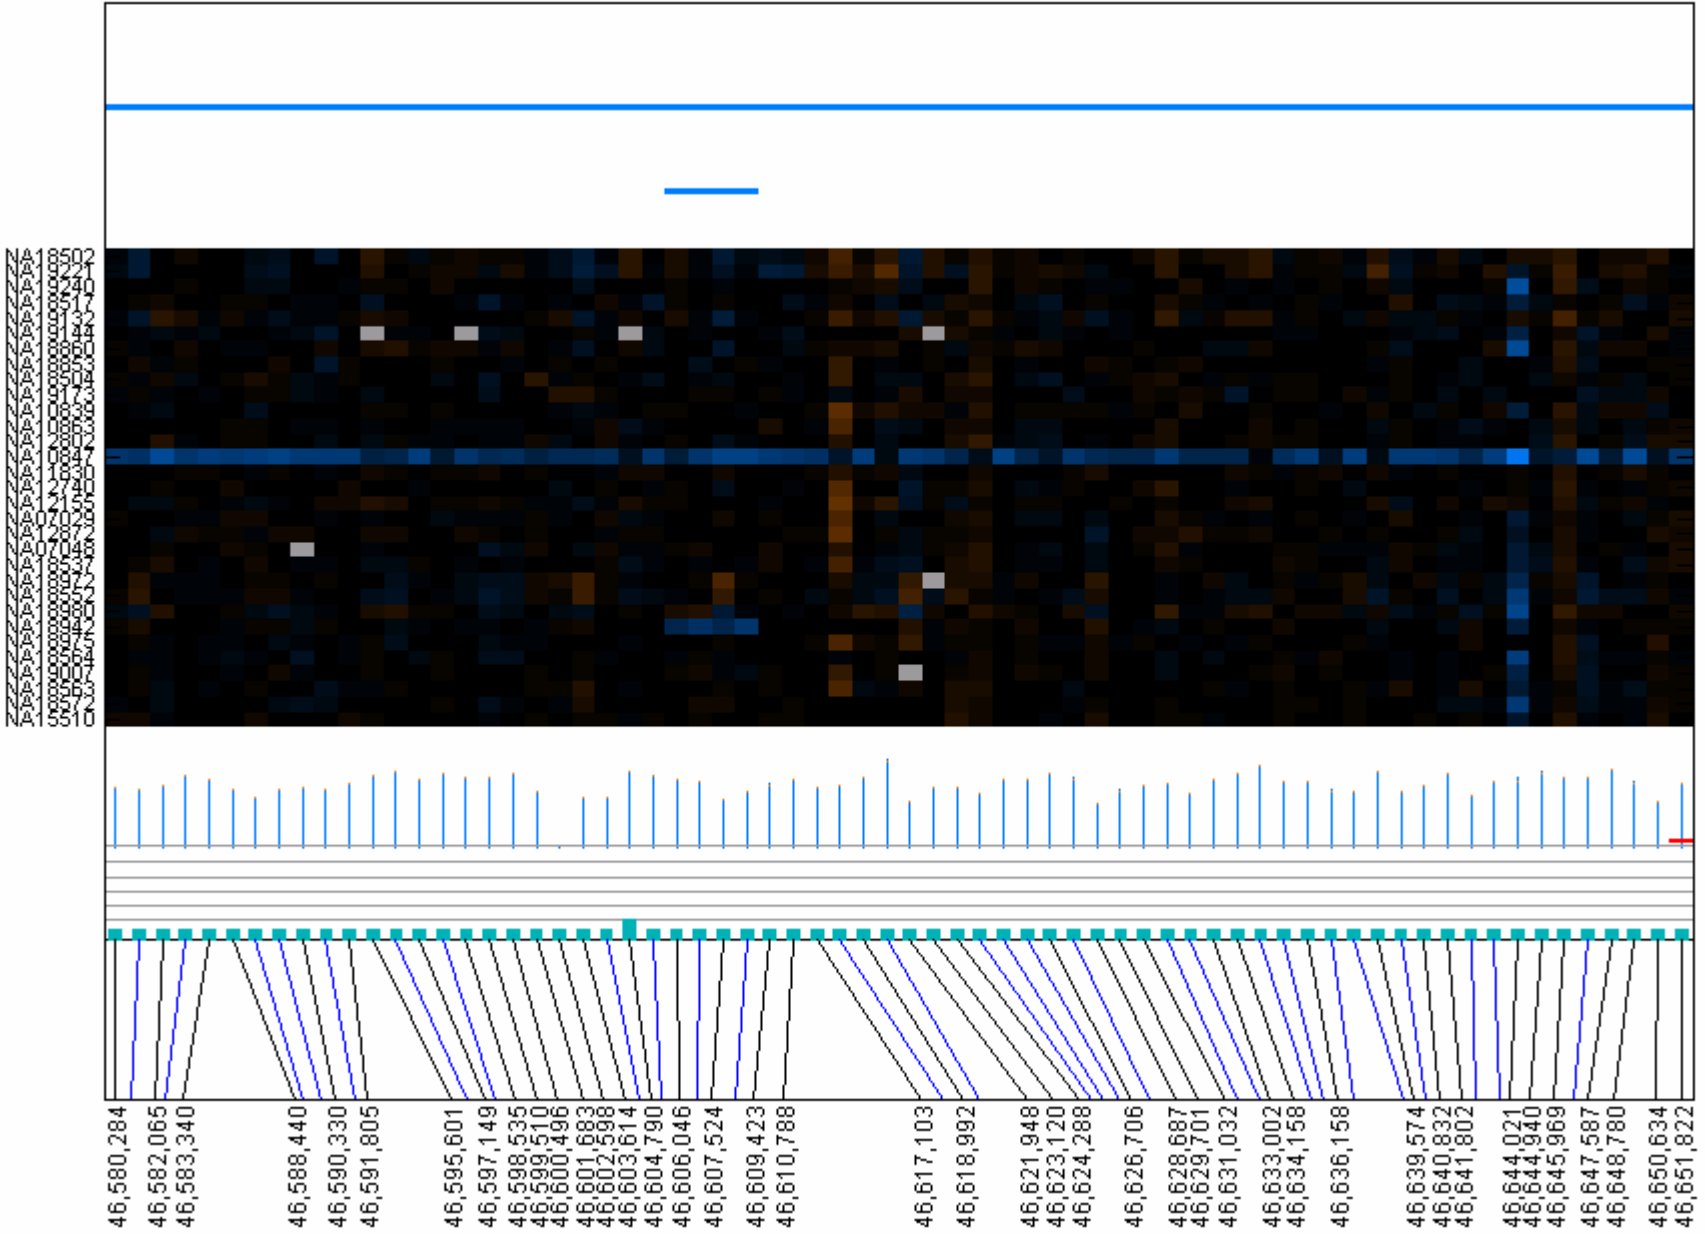

# chr2:056210167-056300318

chr2:056210167-056300318

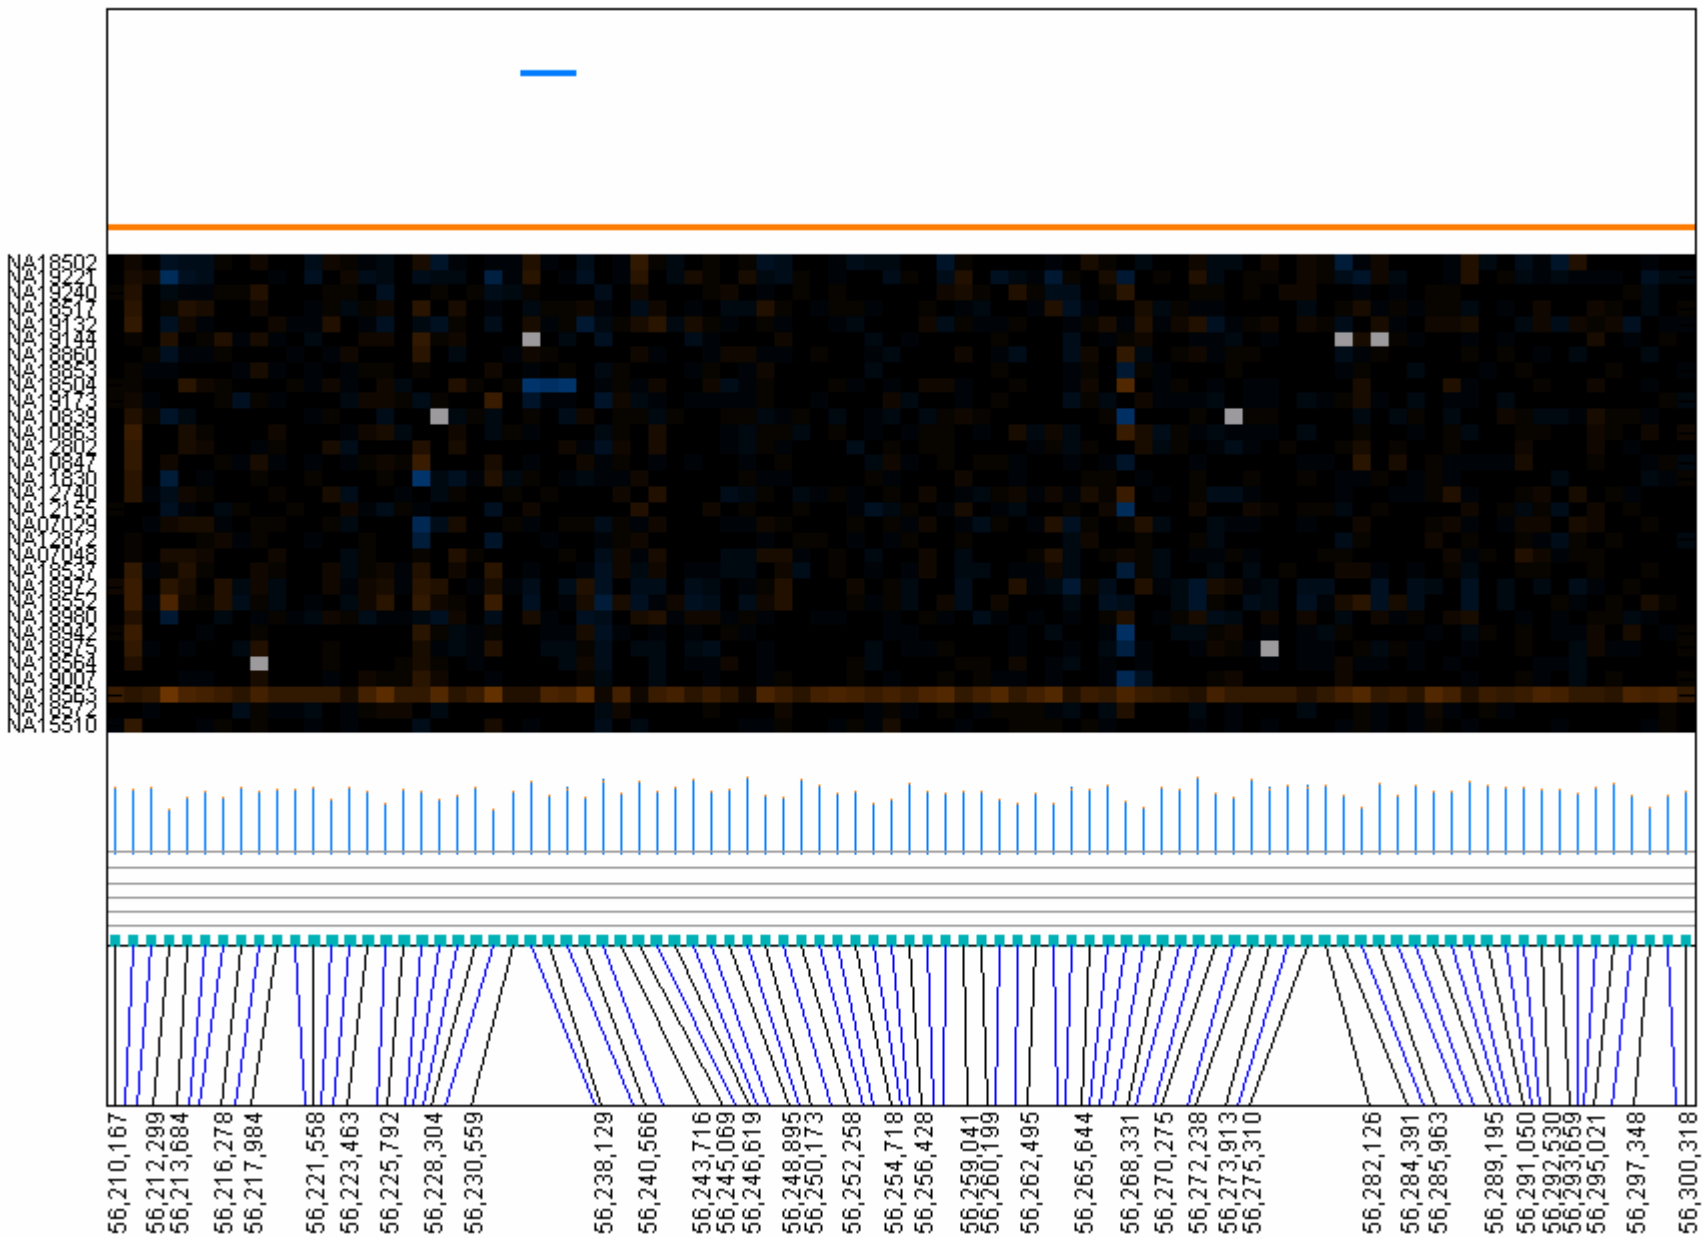

# chr2:087170401-087877080

chr2:087170401-087877080

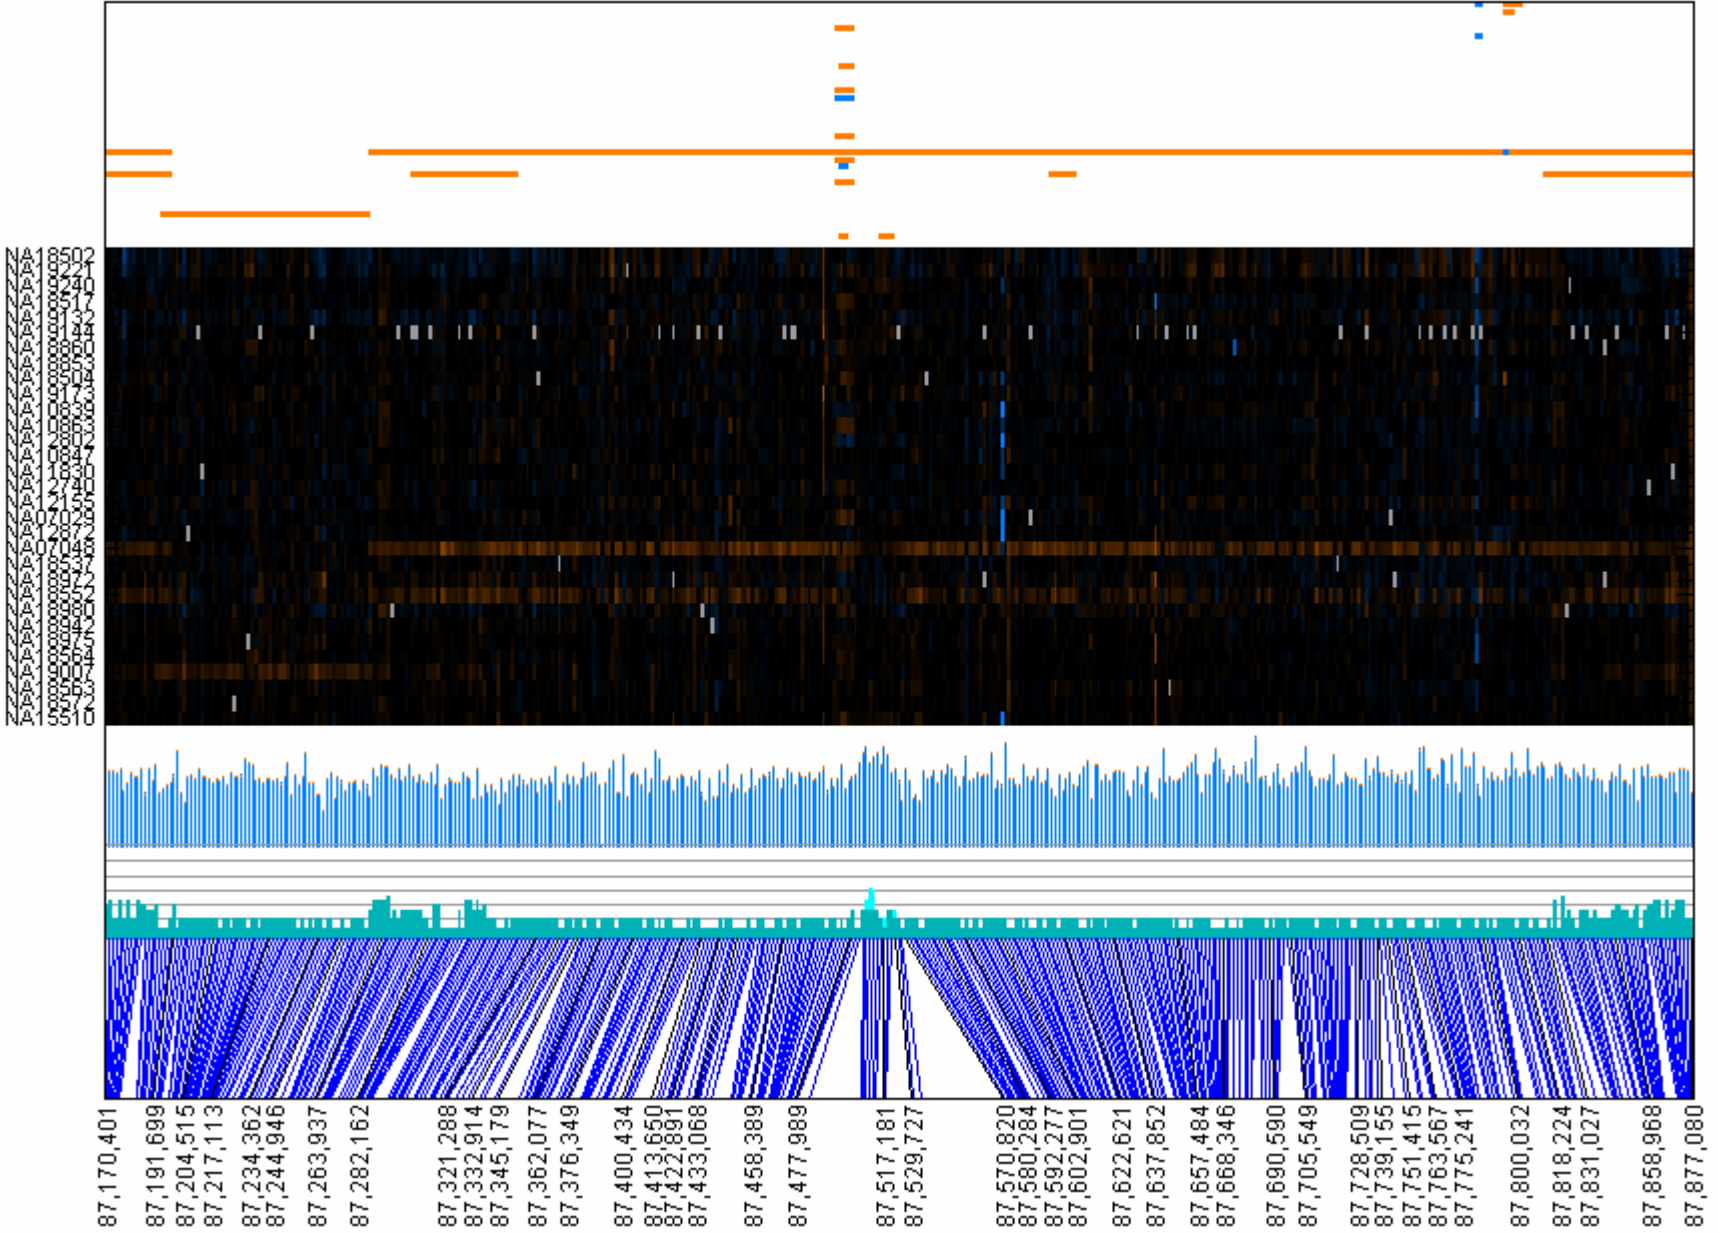



# chr3:163995793-164108987

chr3:163995793-164108987

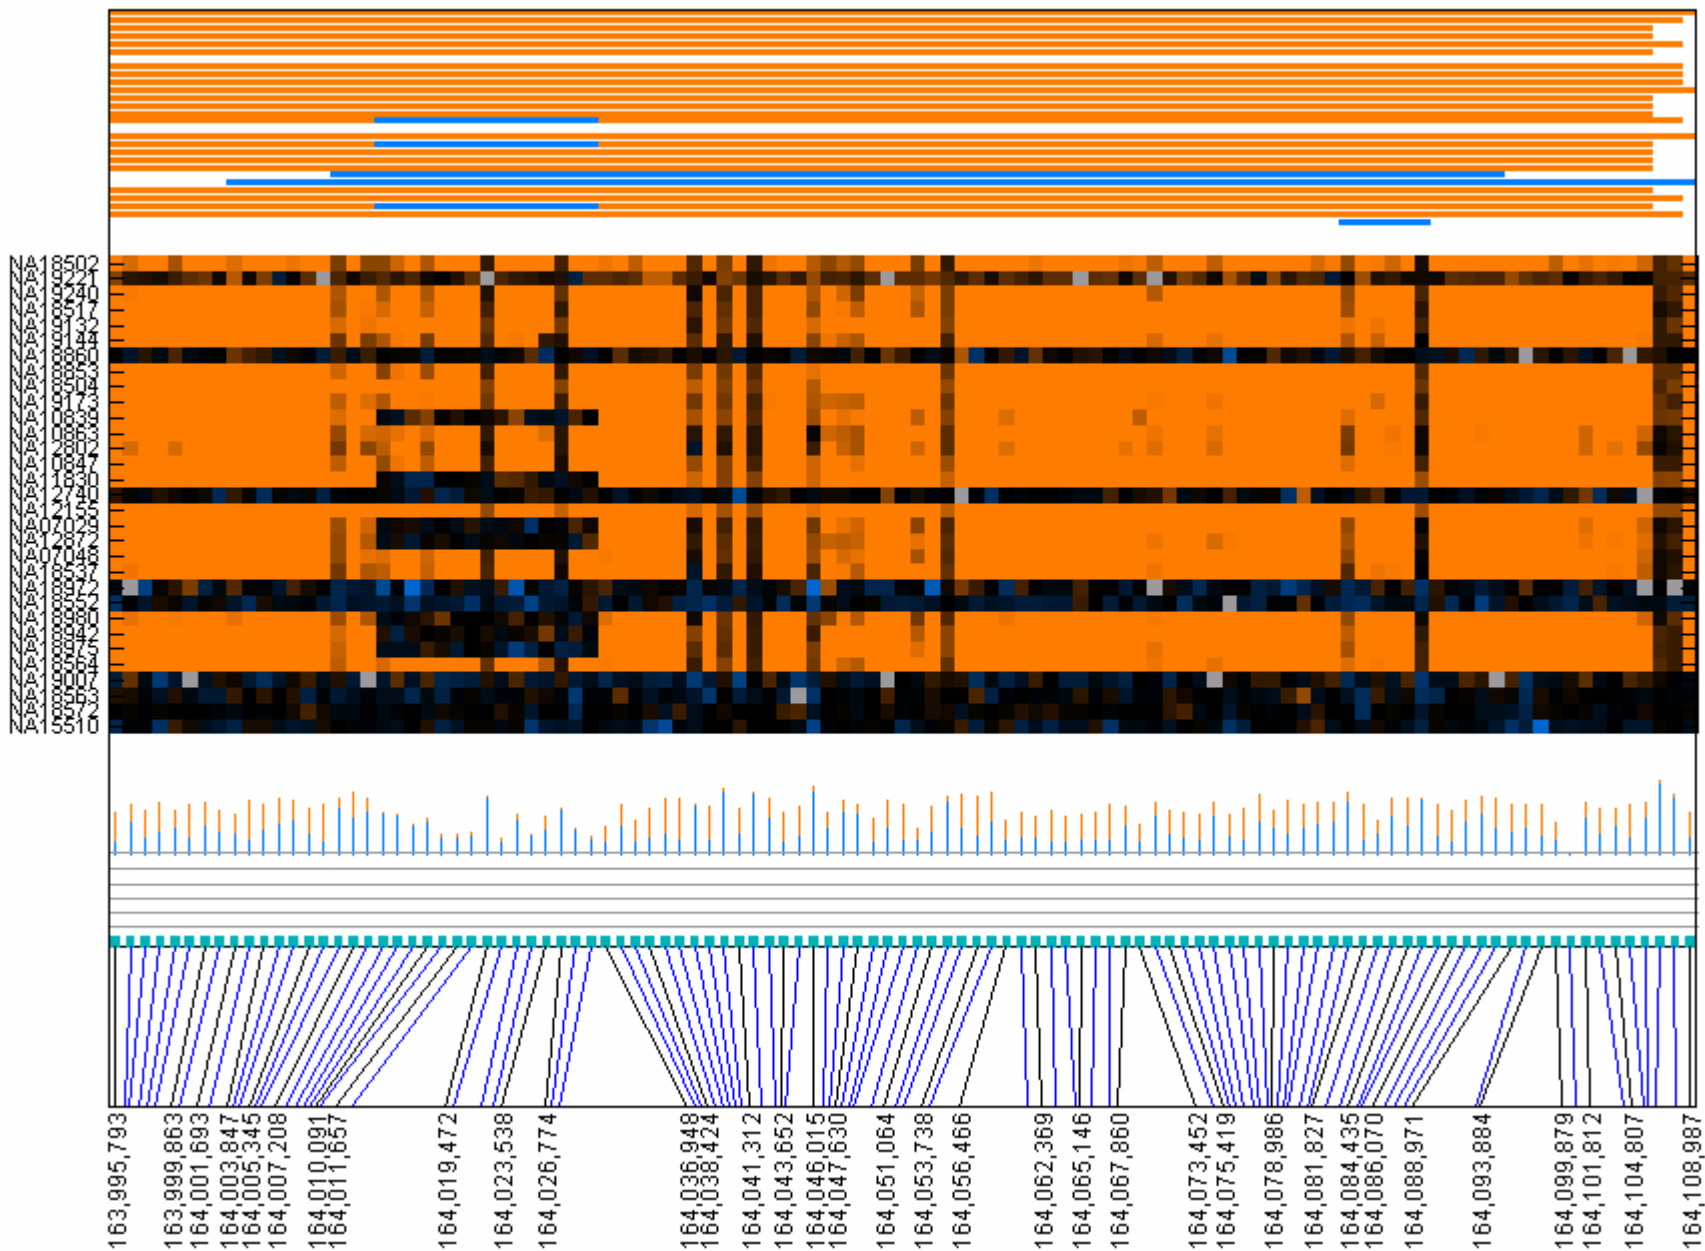



# chr3:196868629-196966607

chr3:196868629-196966607

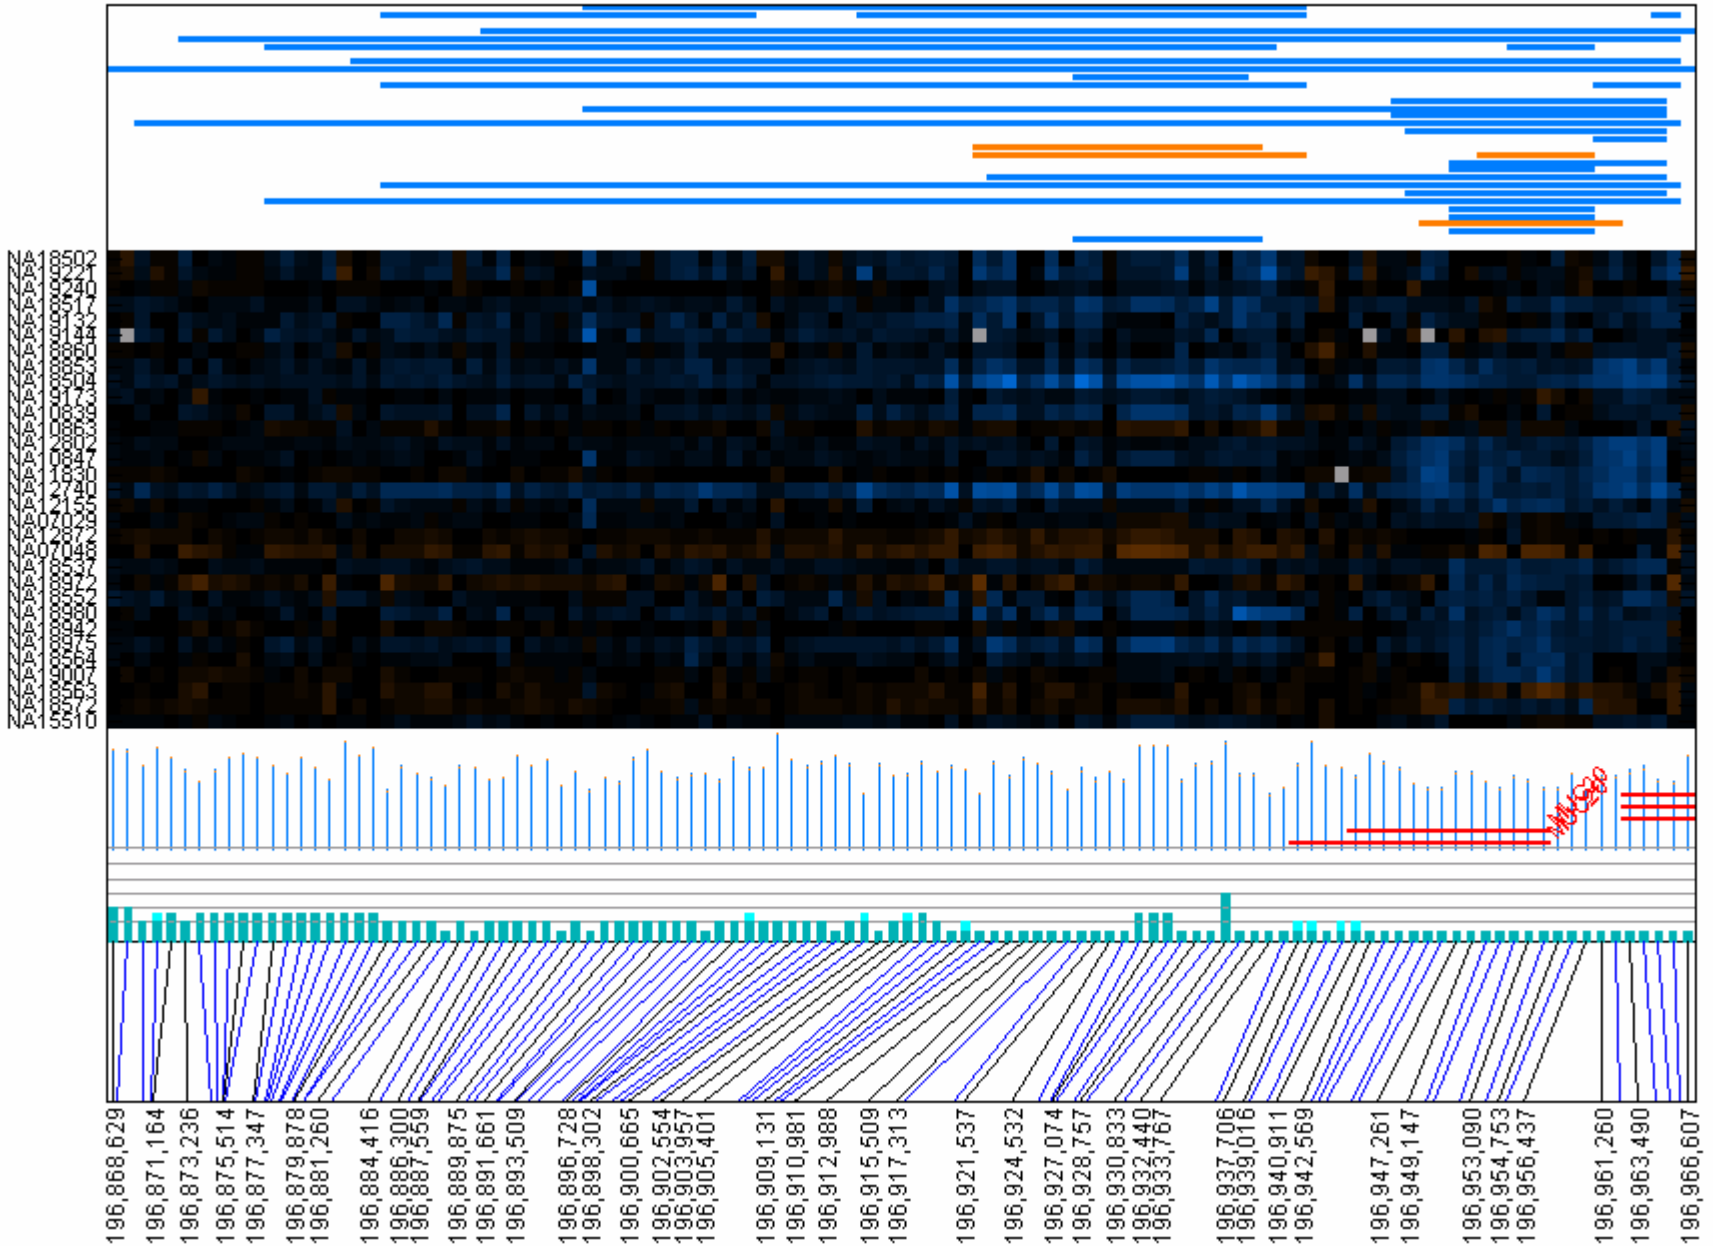

# chr4:049022387-049471630

chr4:049022387-049471630

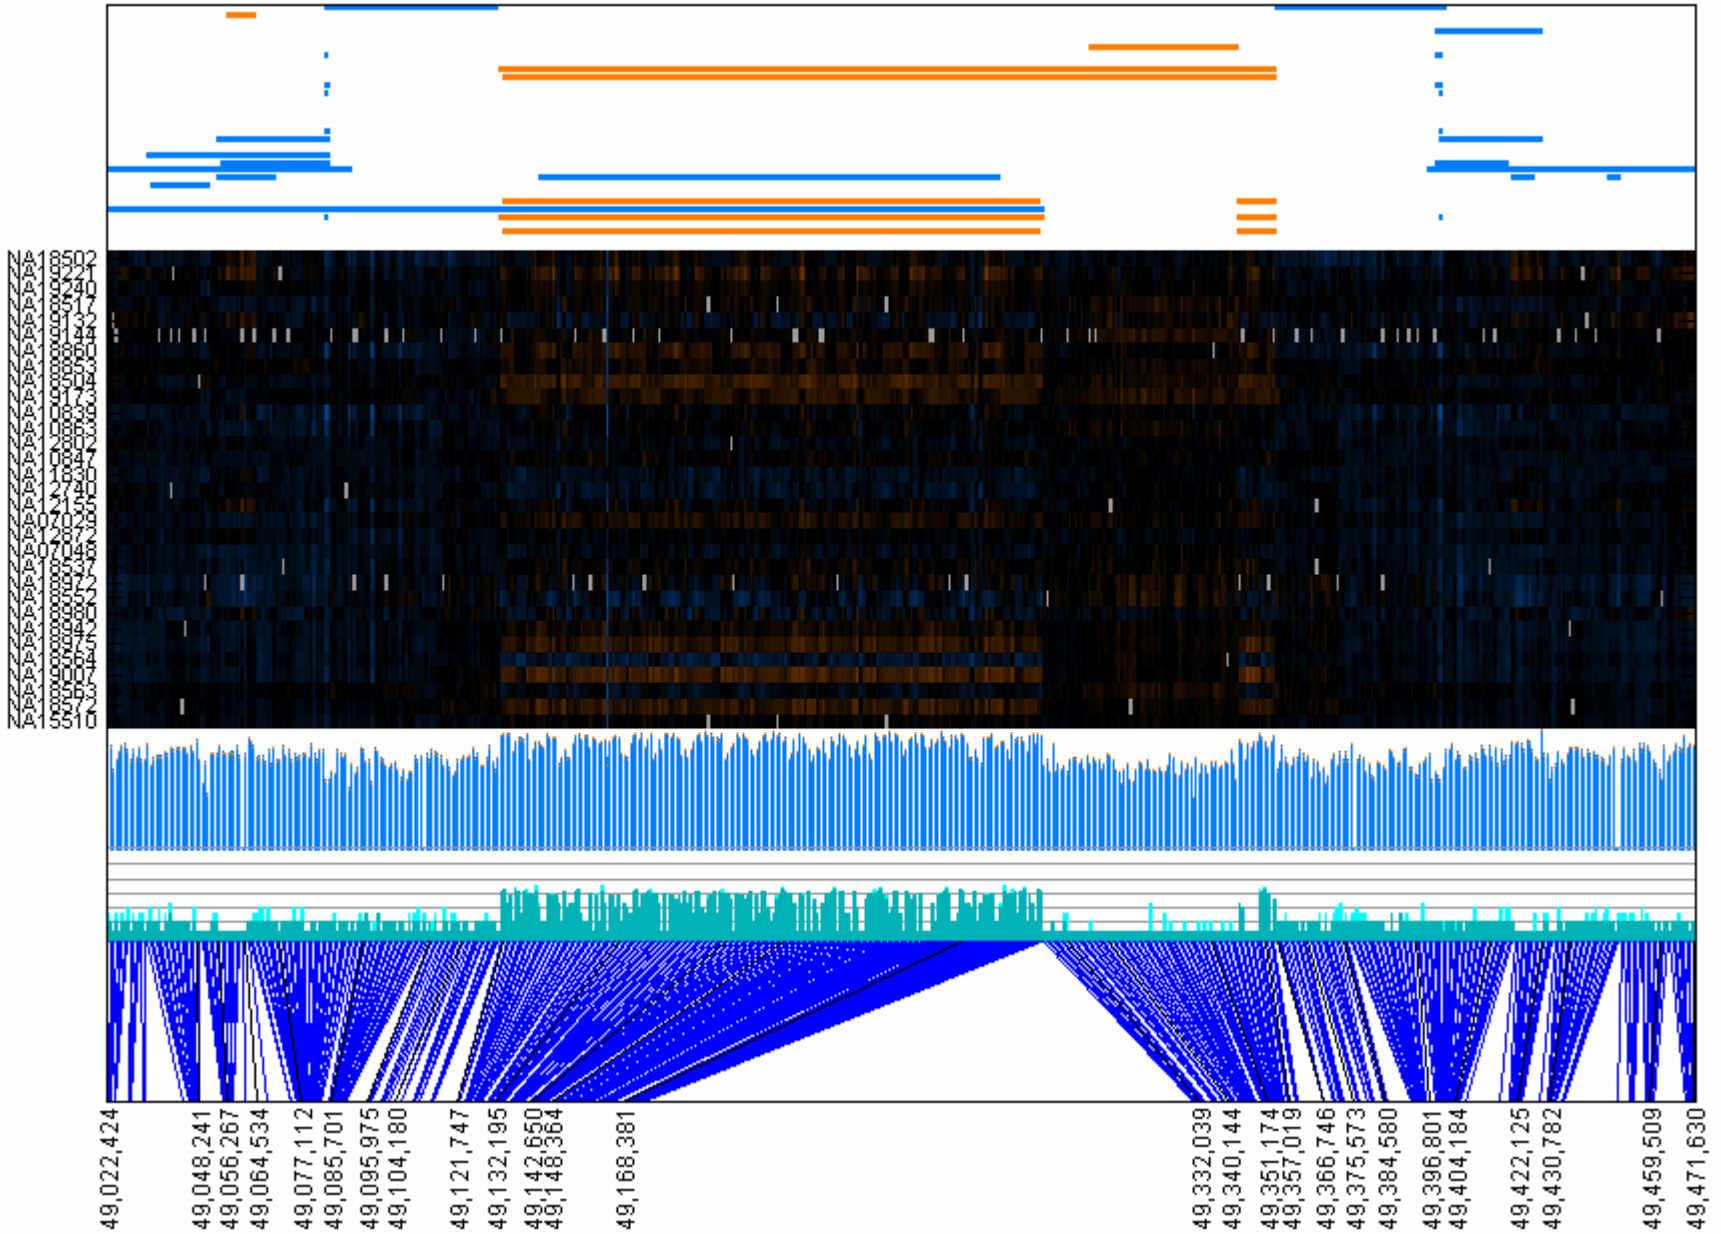

# chr4:124617696-125613132

chr4:124617696-125613132

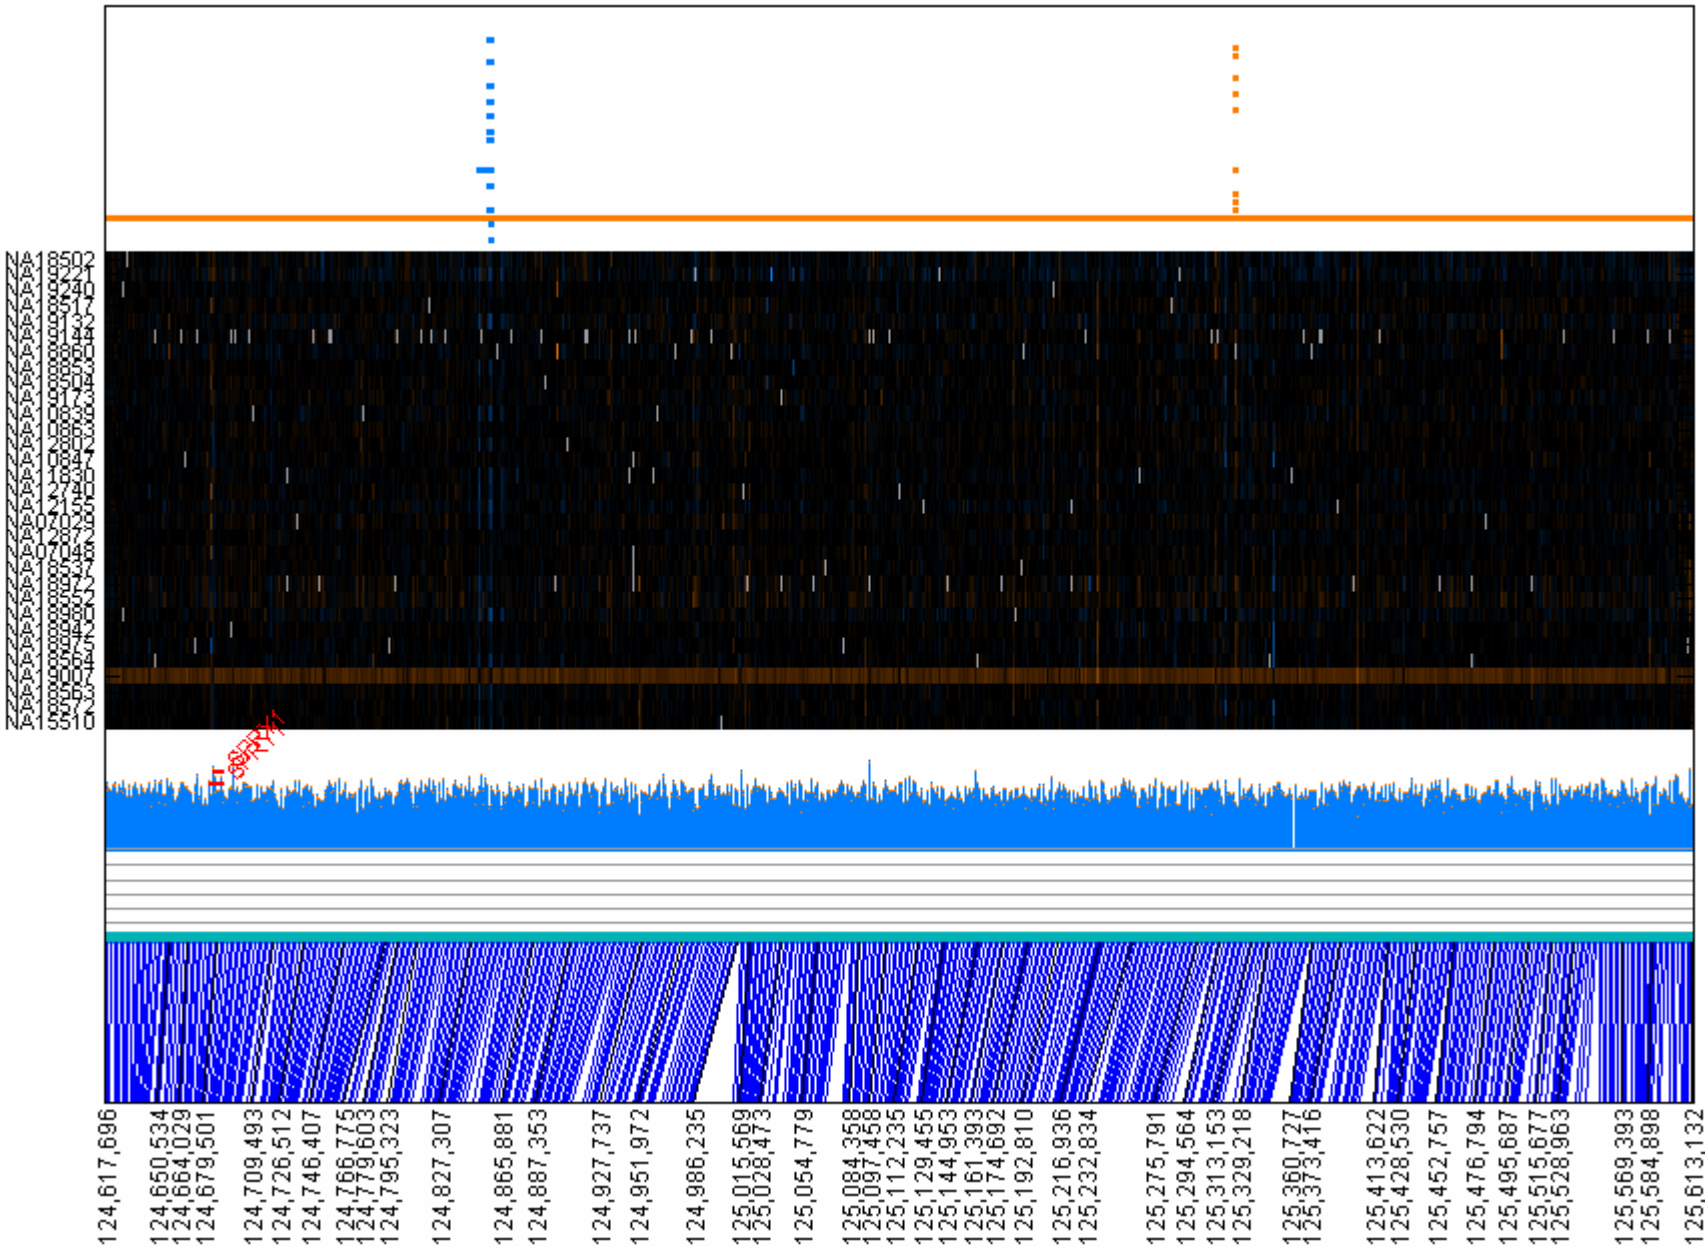

# chr4:133001890-133252862

chr4:133001890-133252862

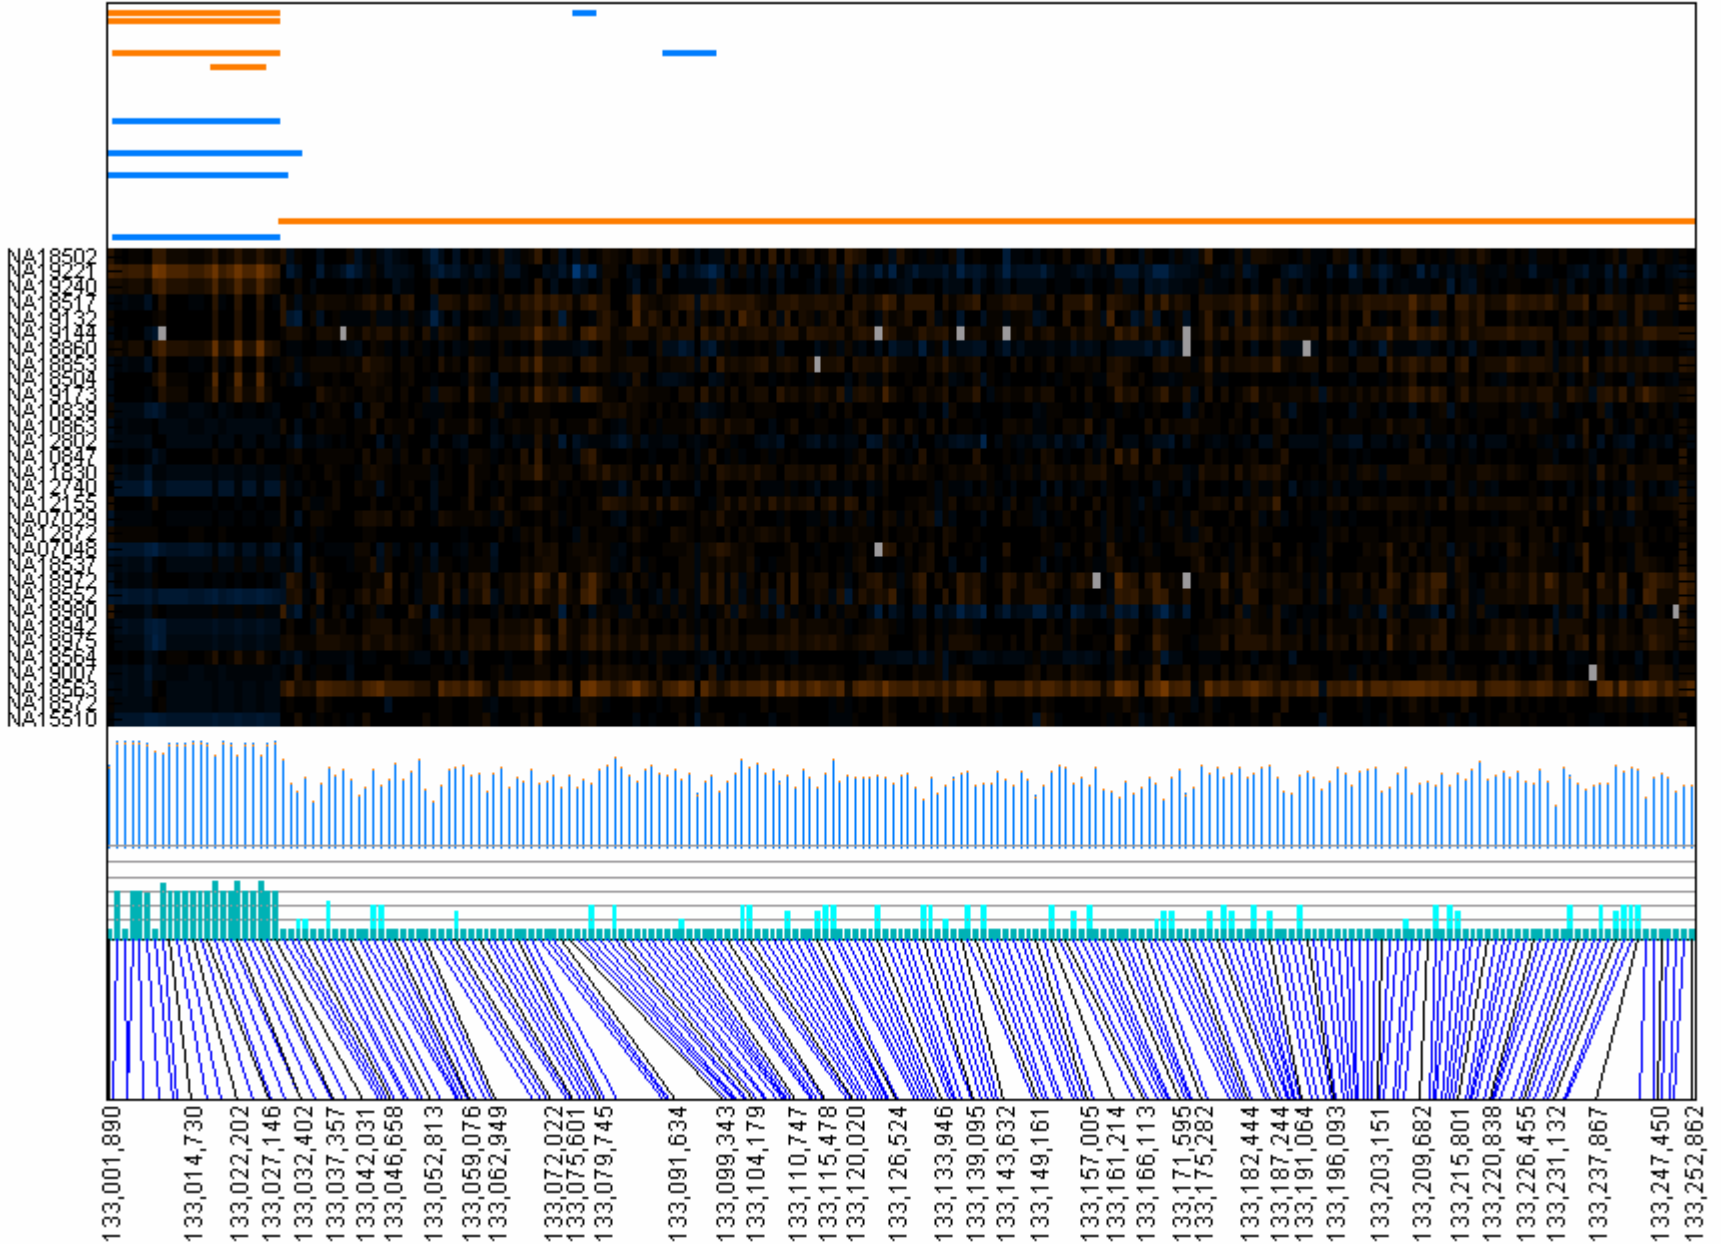

# chr4:145115852-145401303

chr4:145115852-145401303

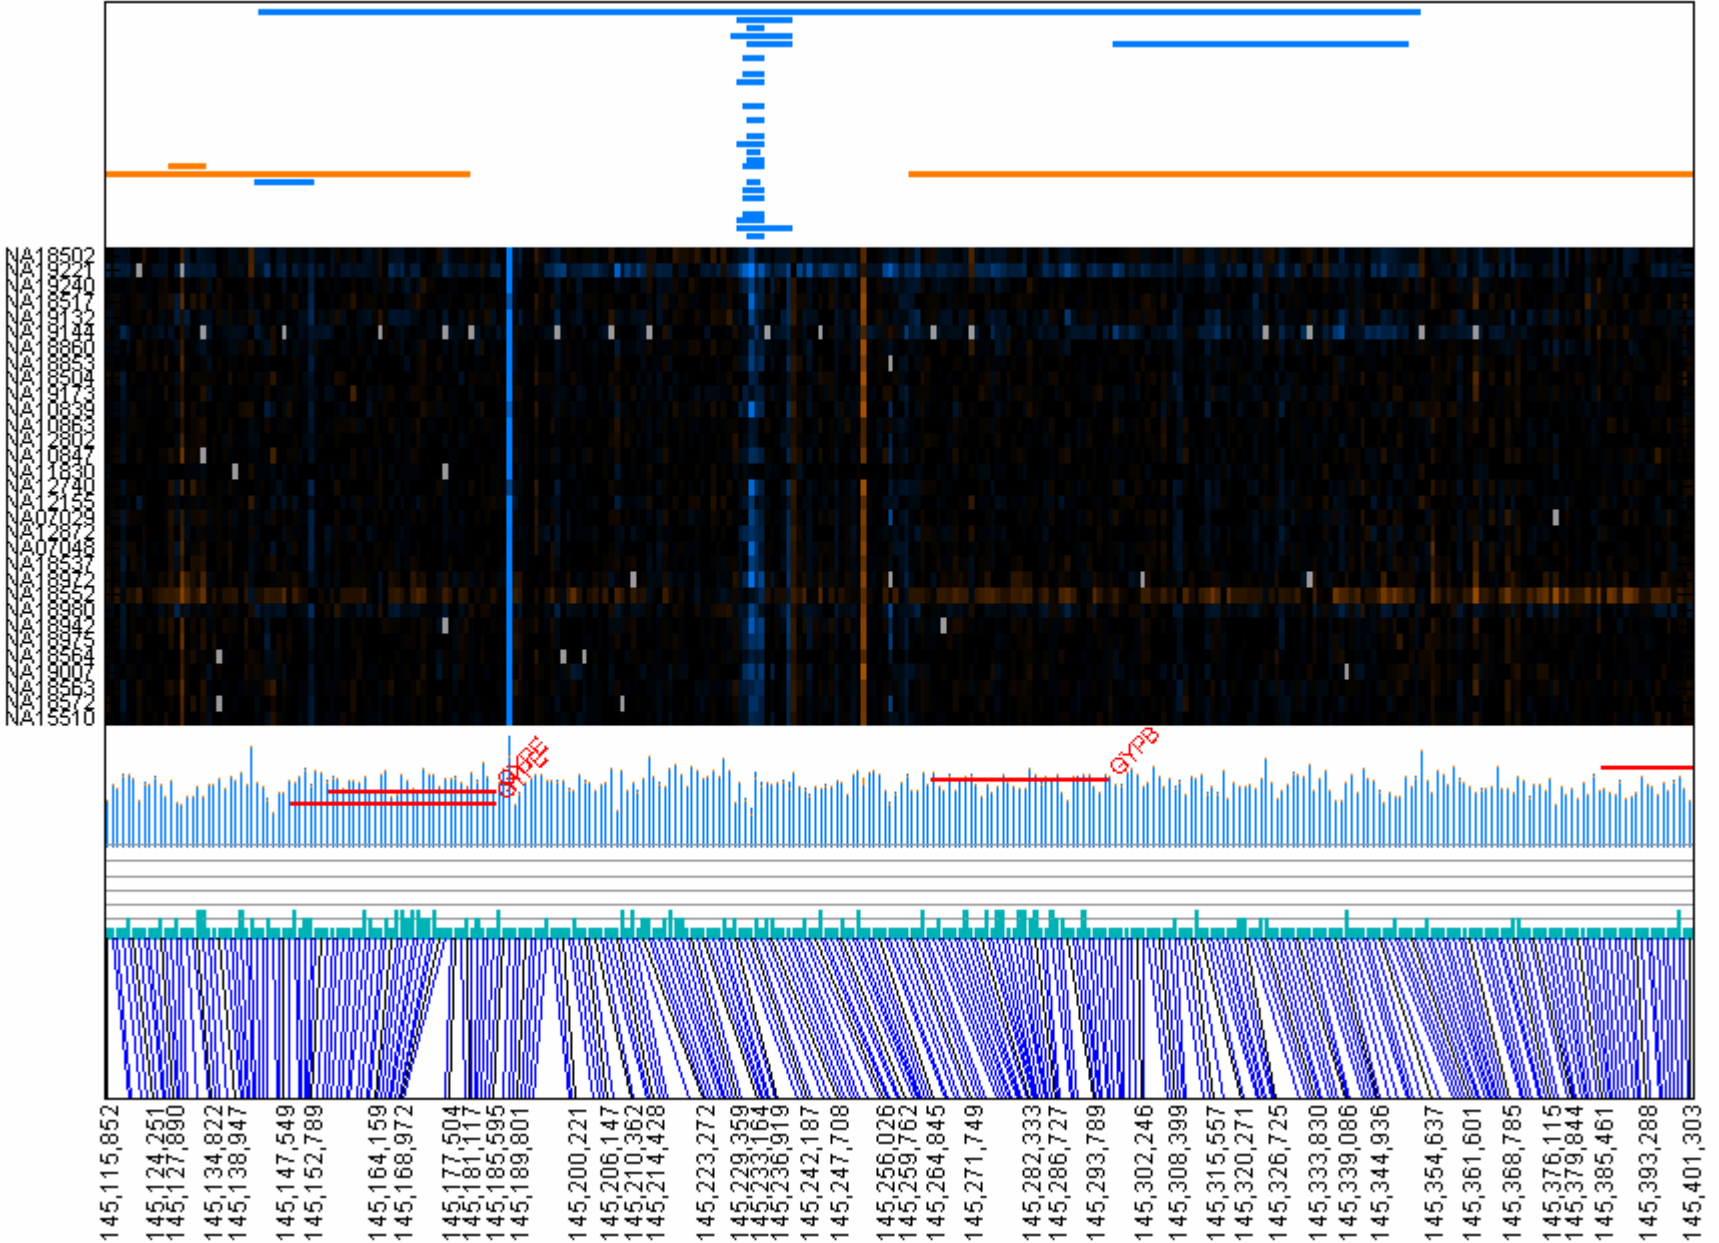

chr4:162219182-162288939

chr4:162219182-162288939

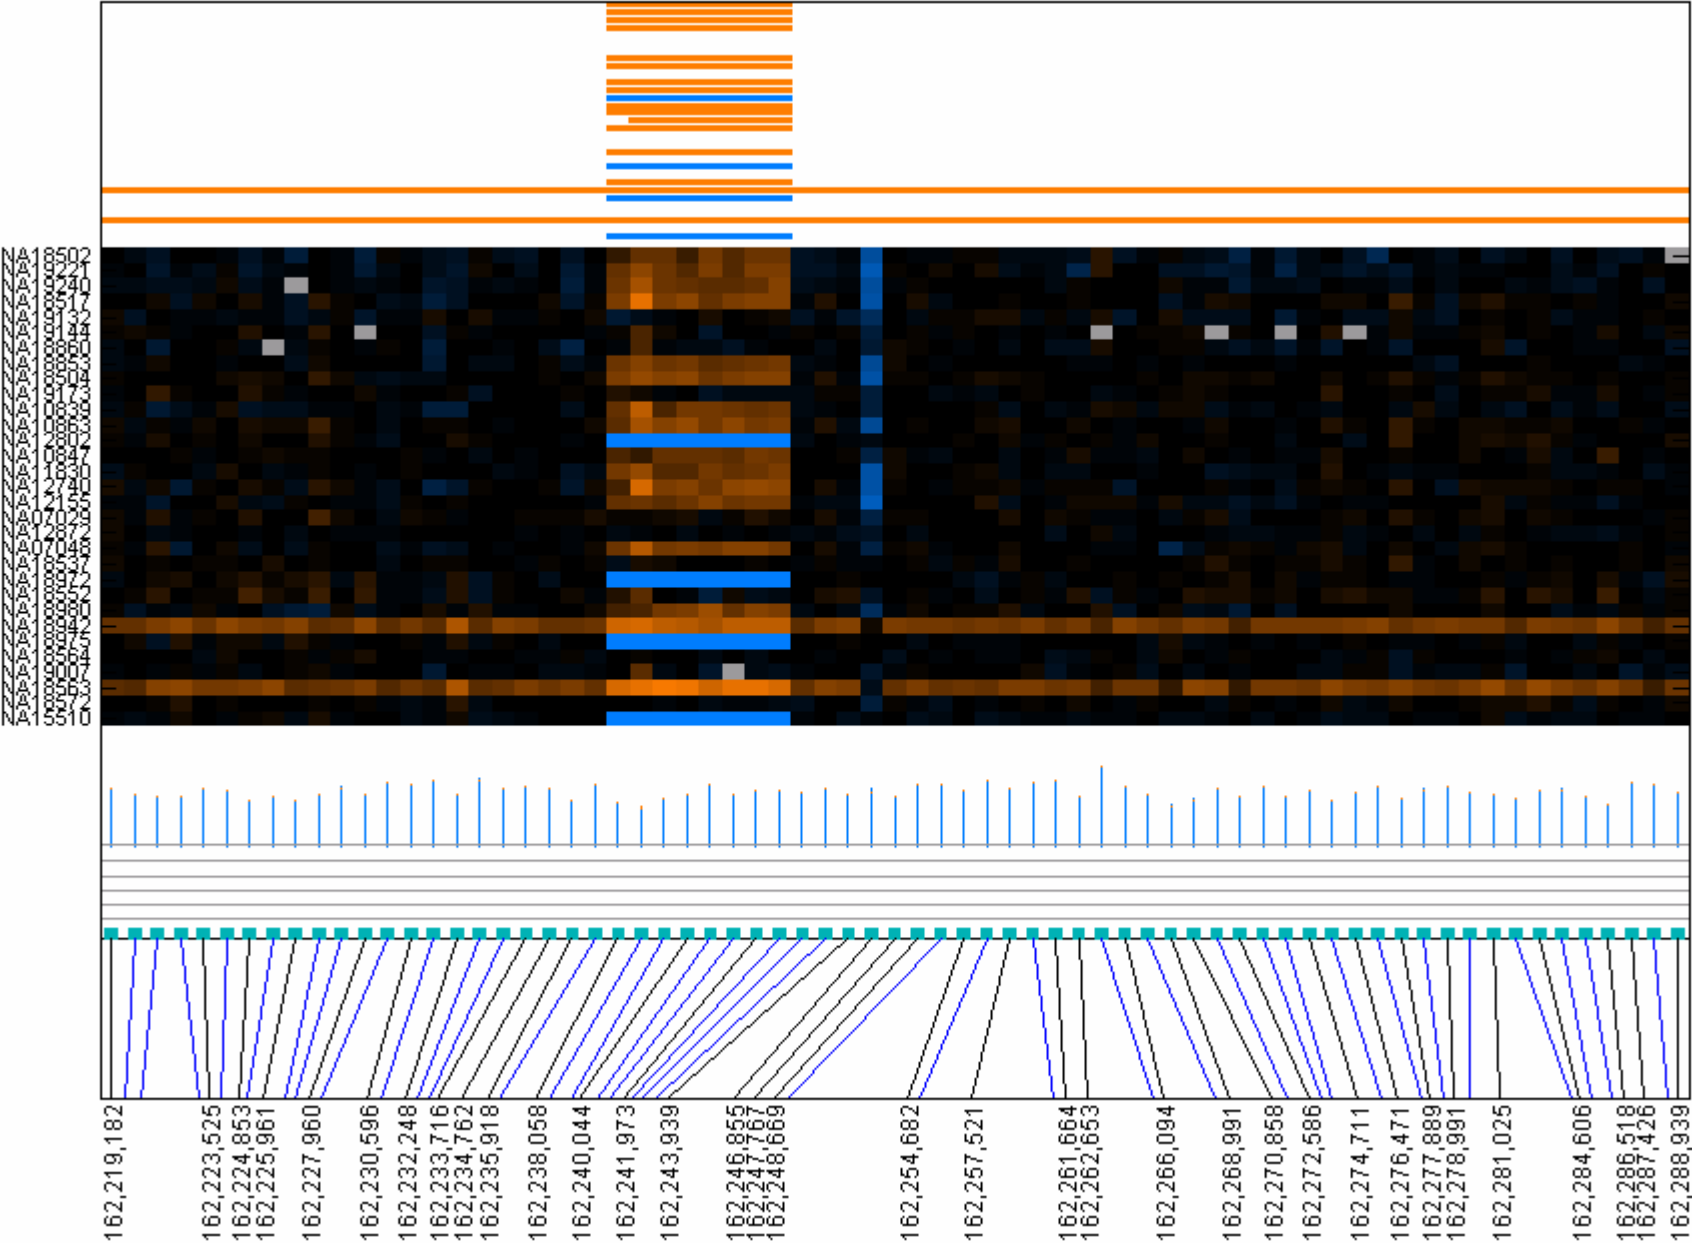

# chr4:190846486-191059242

chr4:190846486-191059242

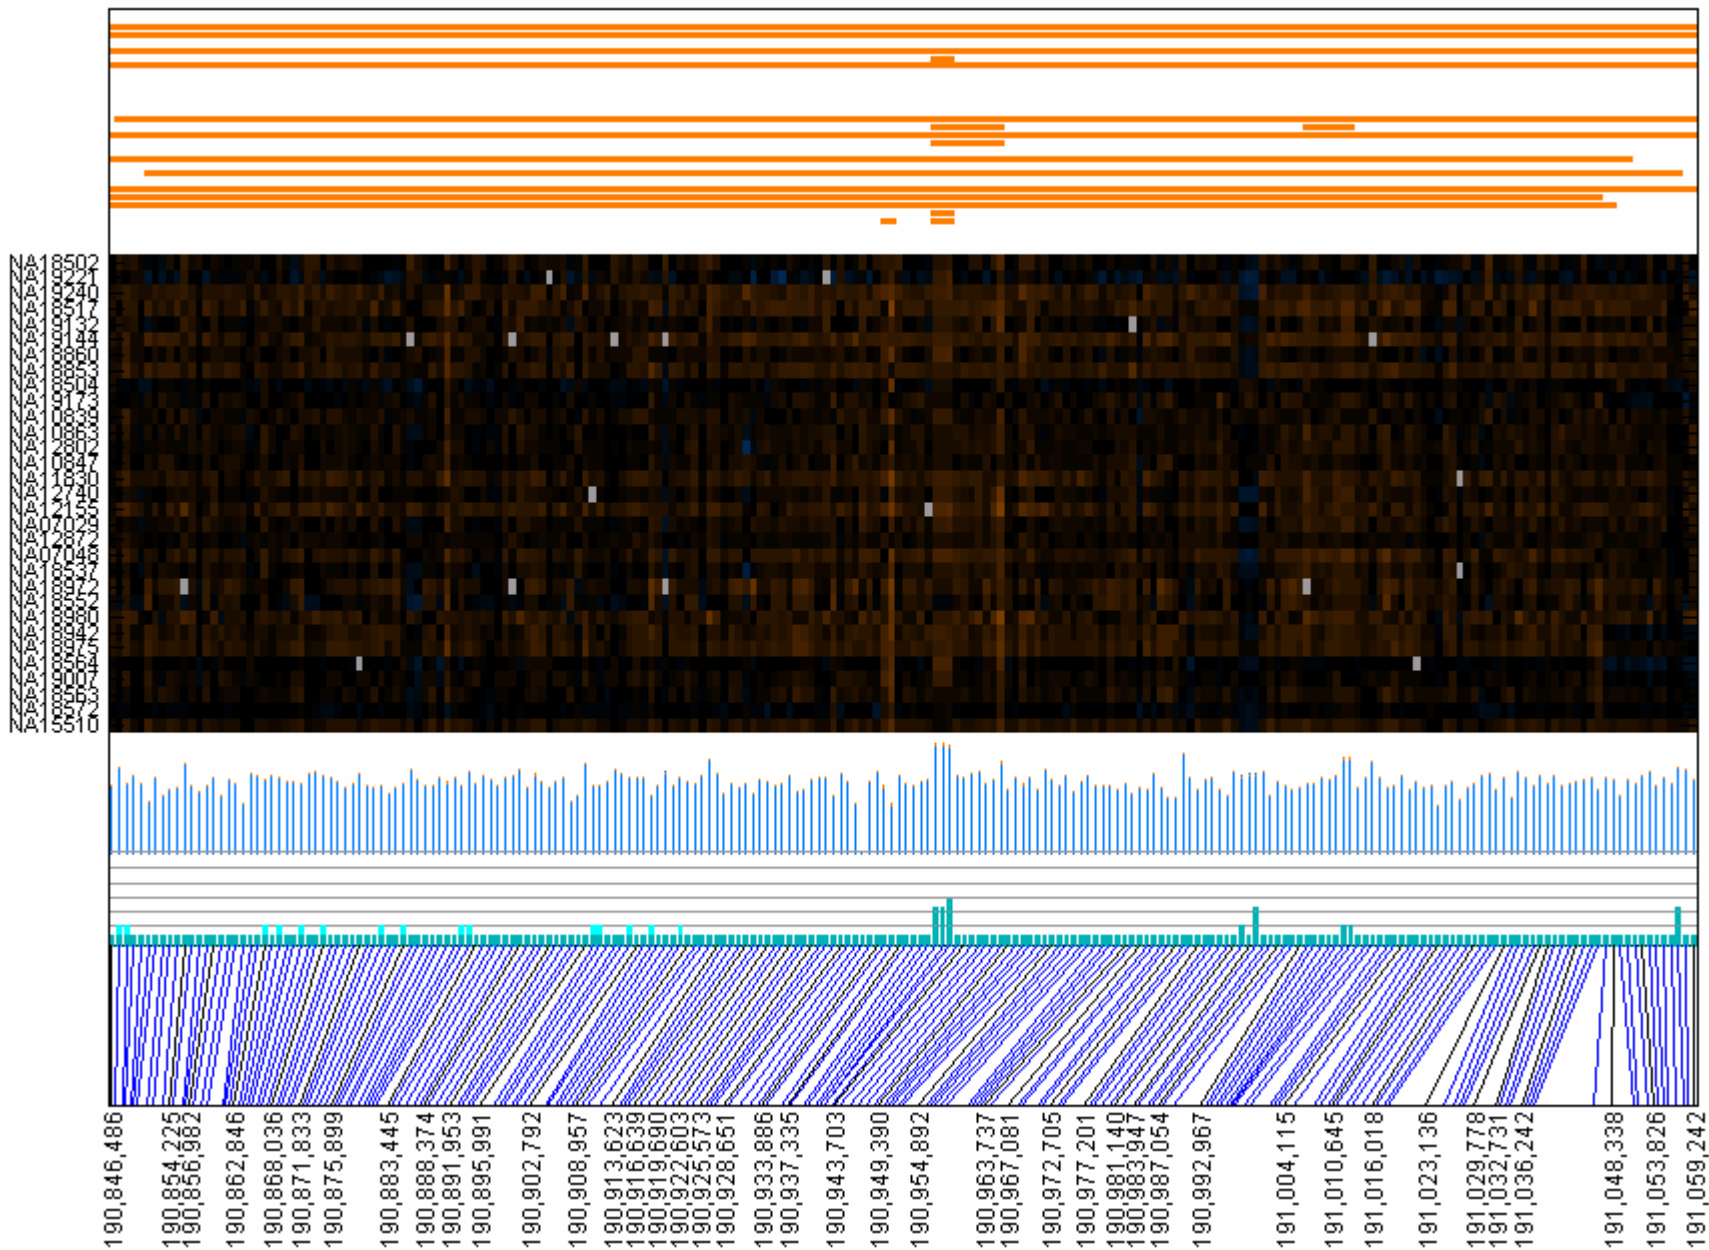

# chr5:000124556-000171474

chr5:000124556-000171474

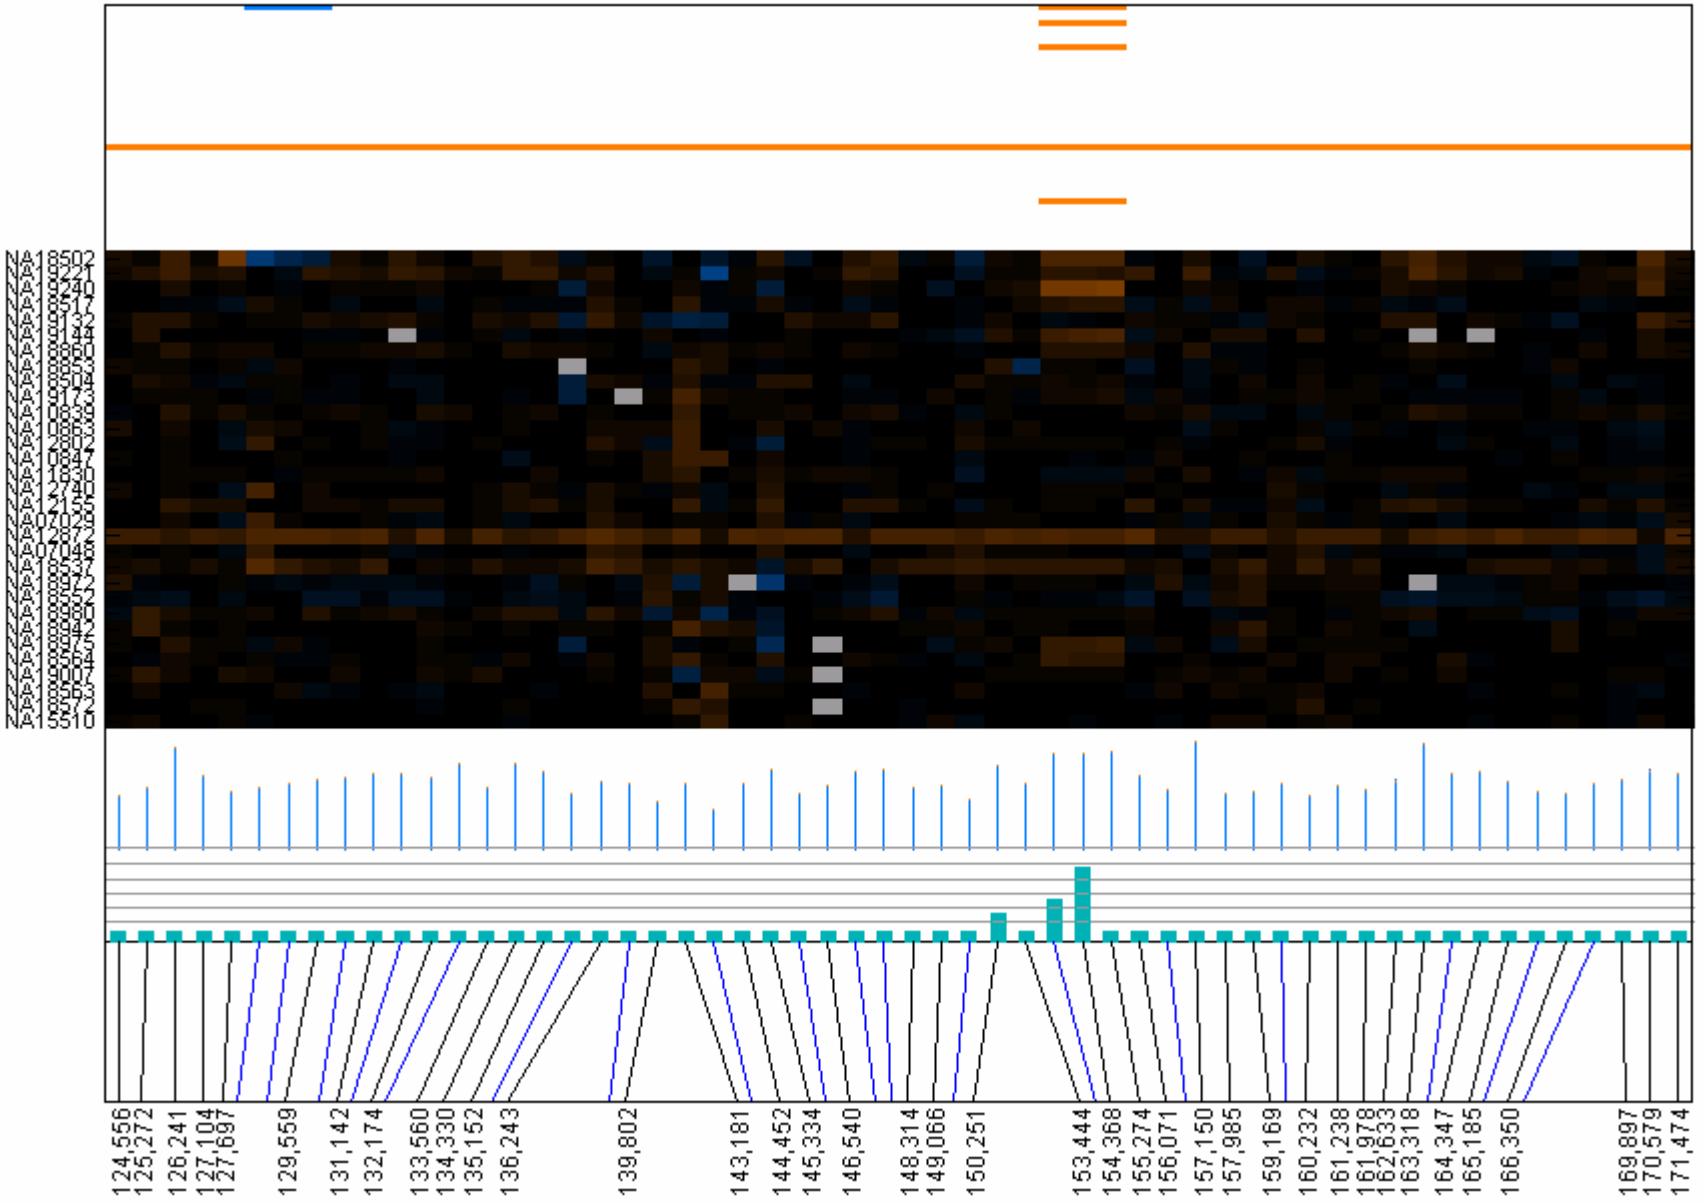



# chr5:013257094-013390719

chr5:013257094-013390719

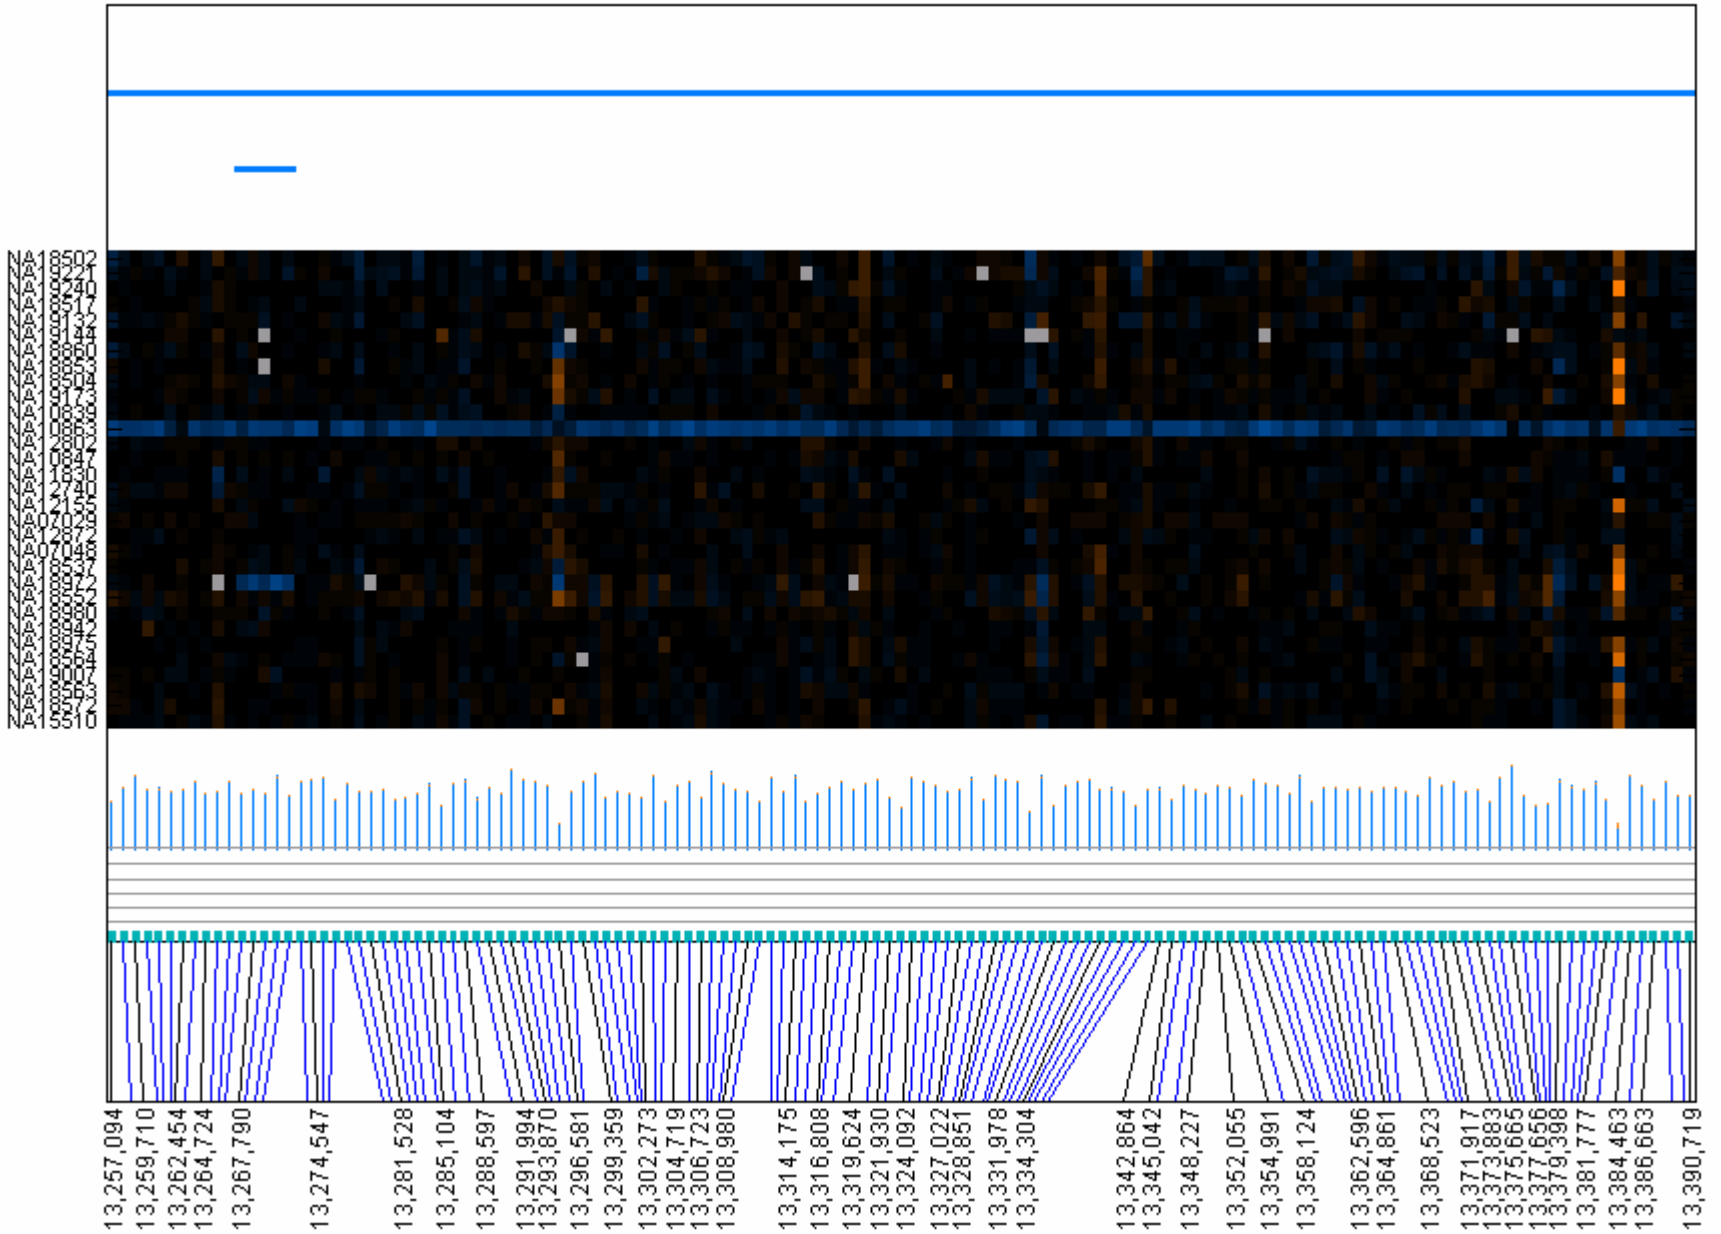

# chr5:017549646-017834235

chr5:017549646-017834235

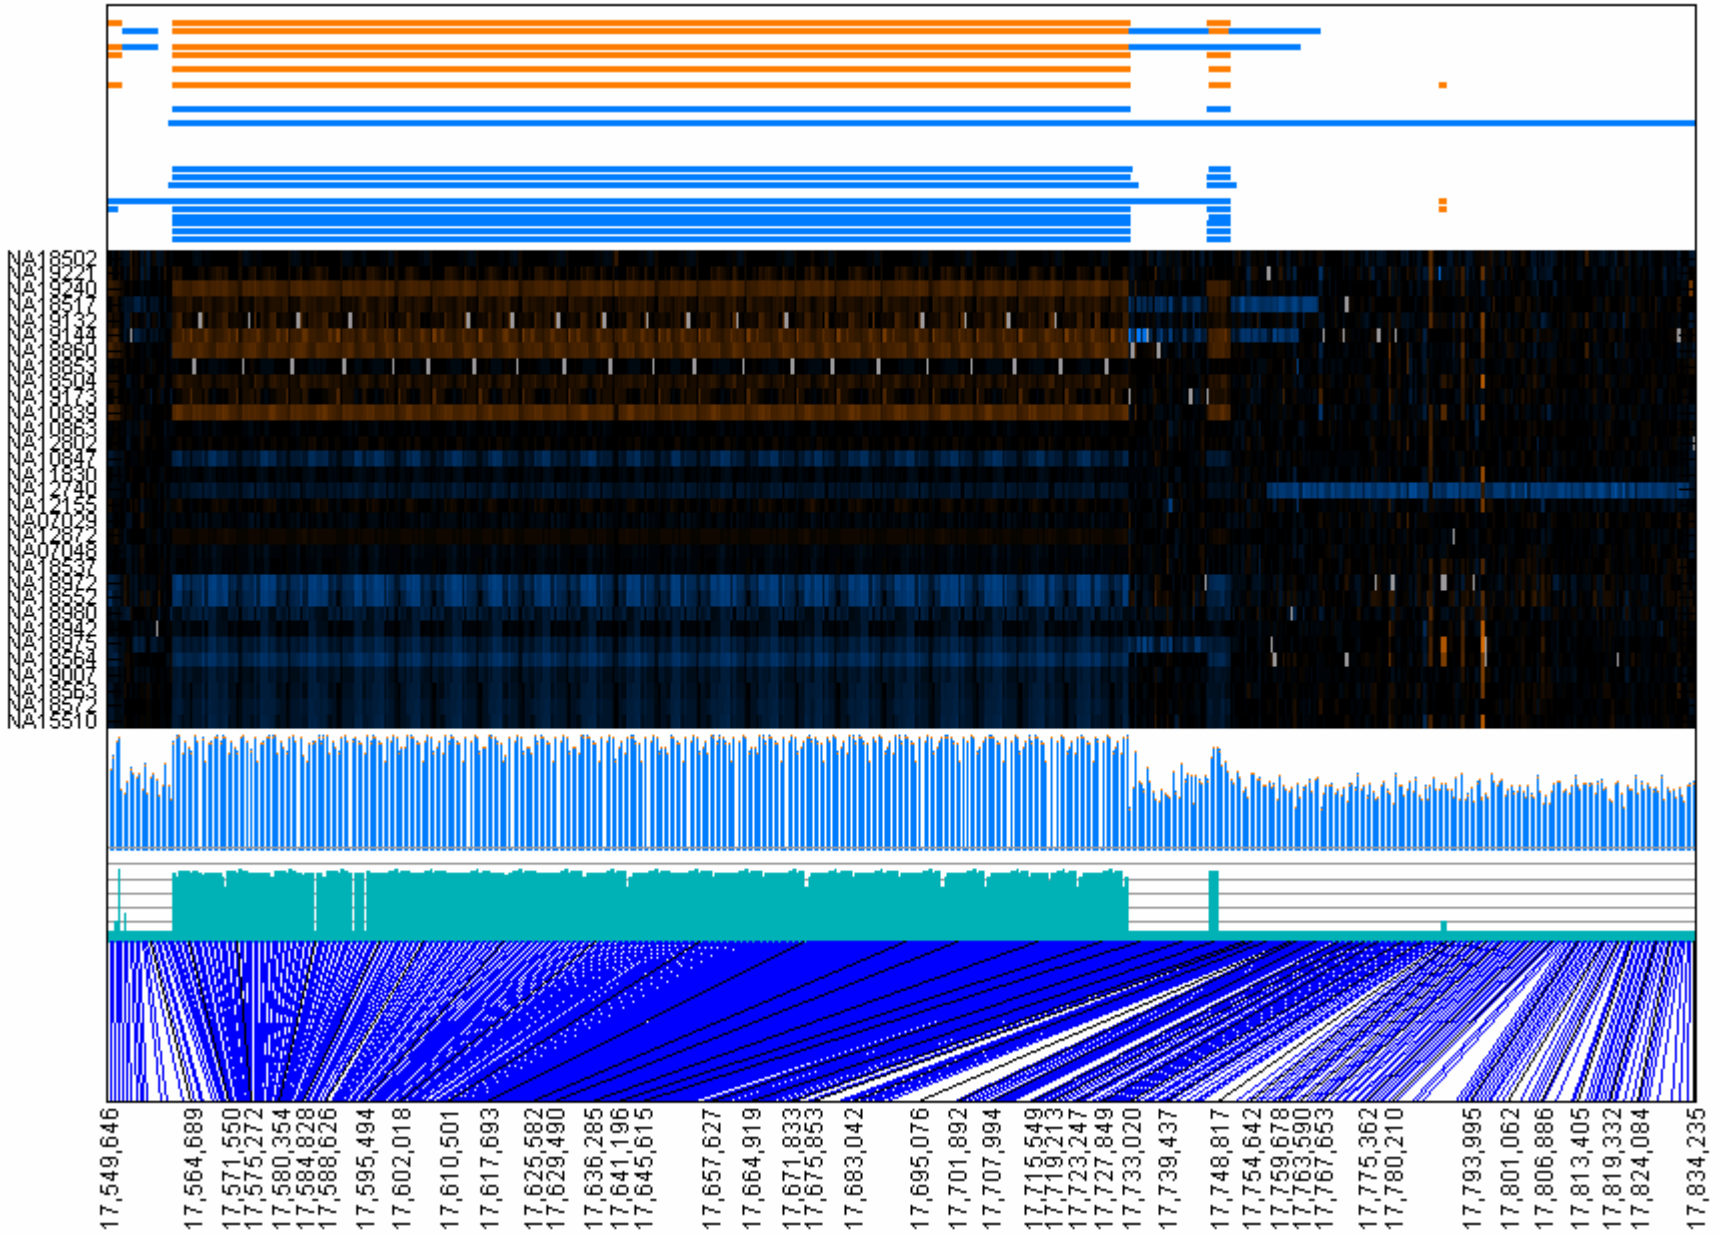

# chr5:034209895-034291585

chr5:034209895-034291585

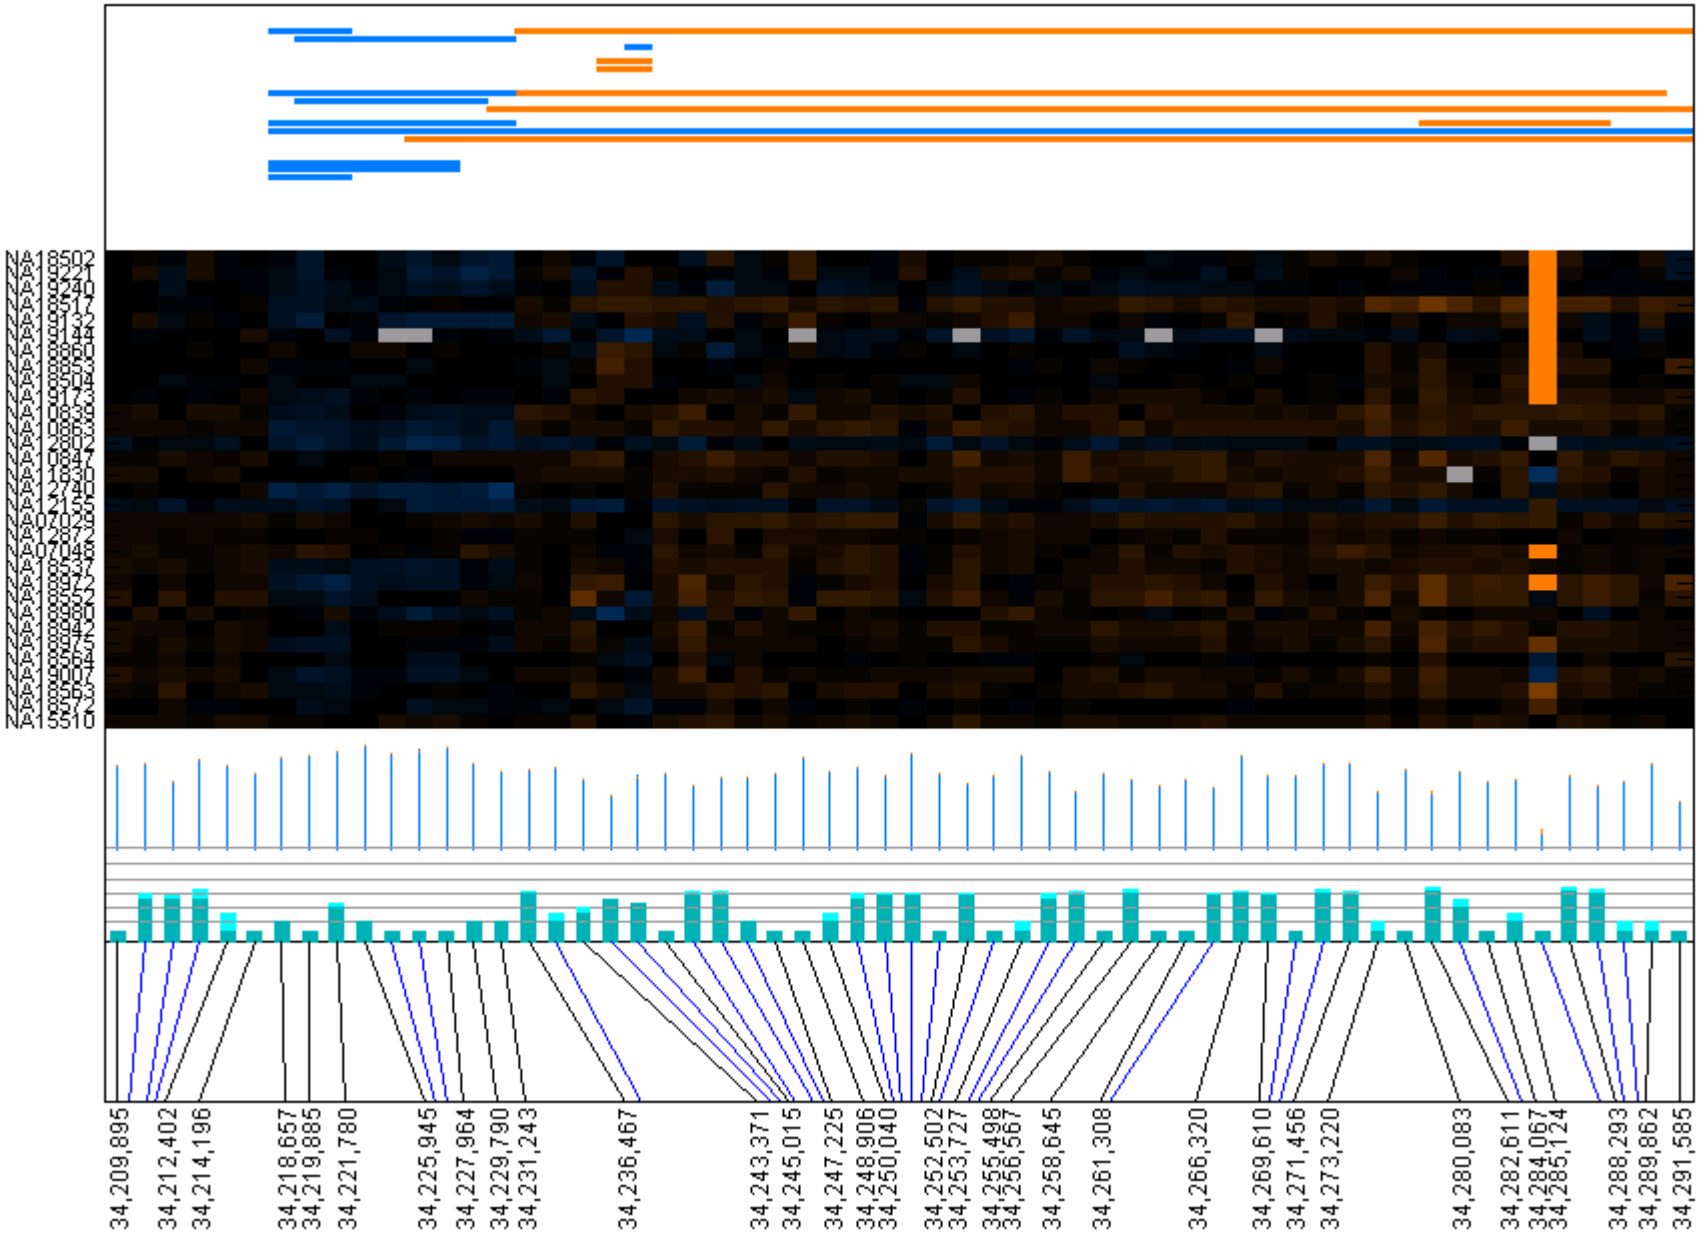

# chr5:068863394-070696498

chr5:068863394-070696498

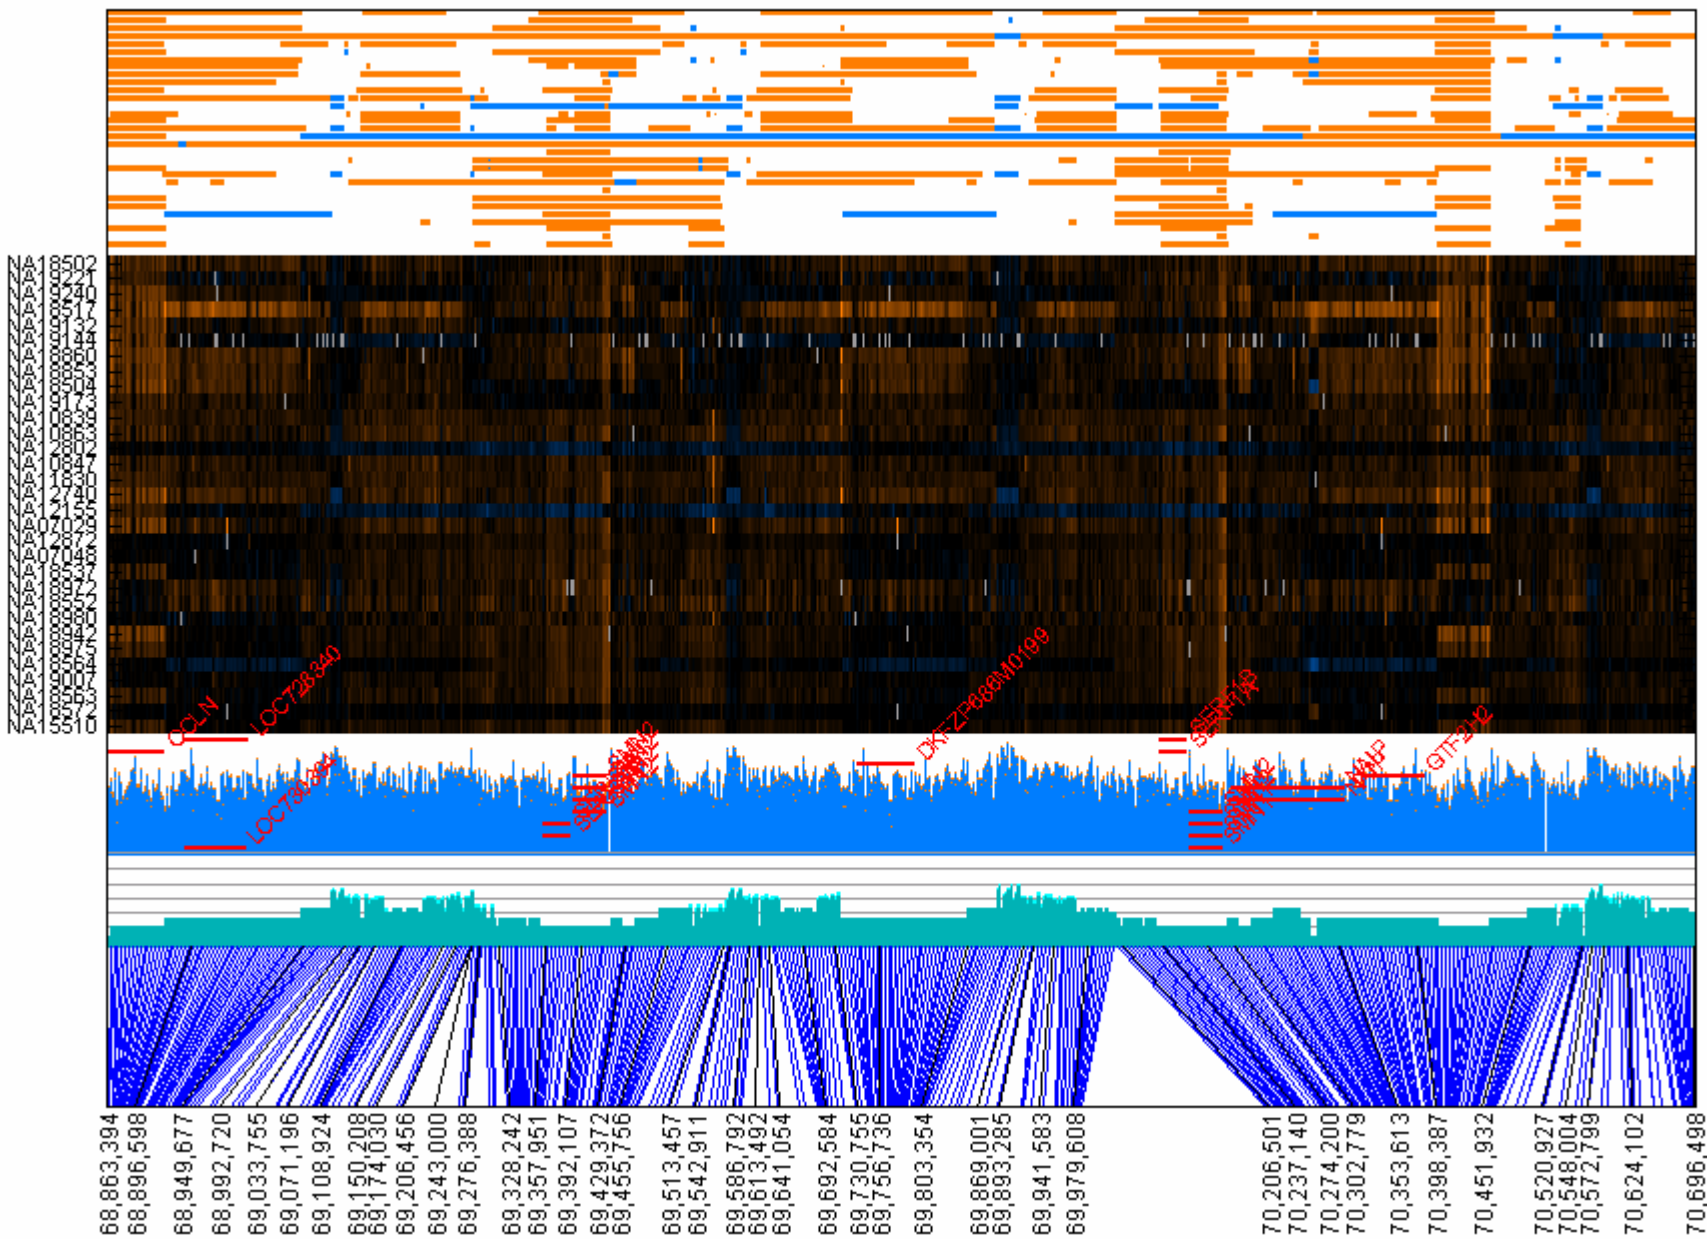

# chr5:099738184-099762102

chr5:099738184-099762102

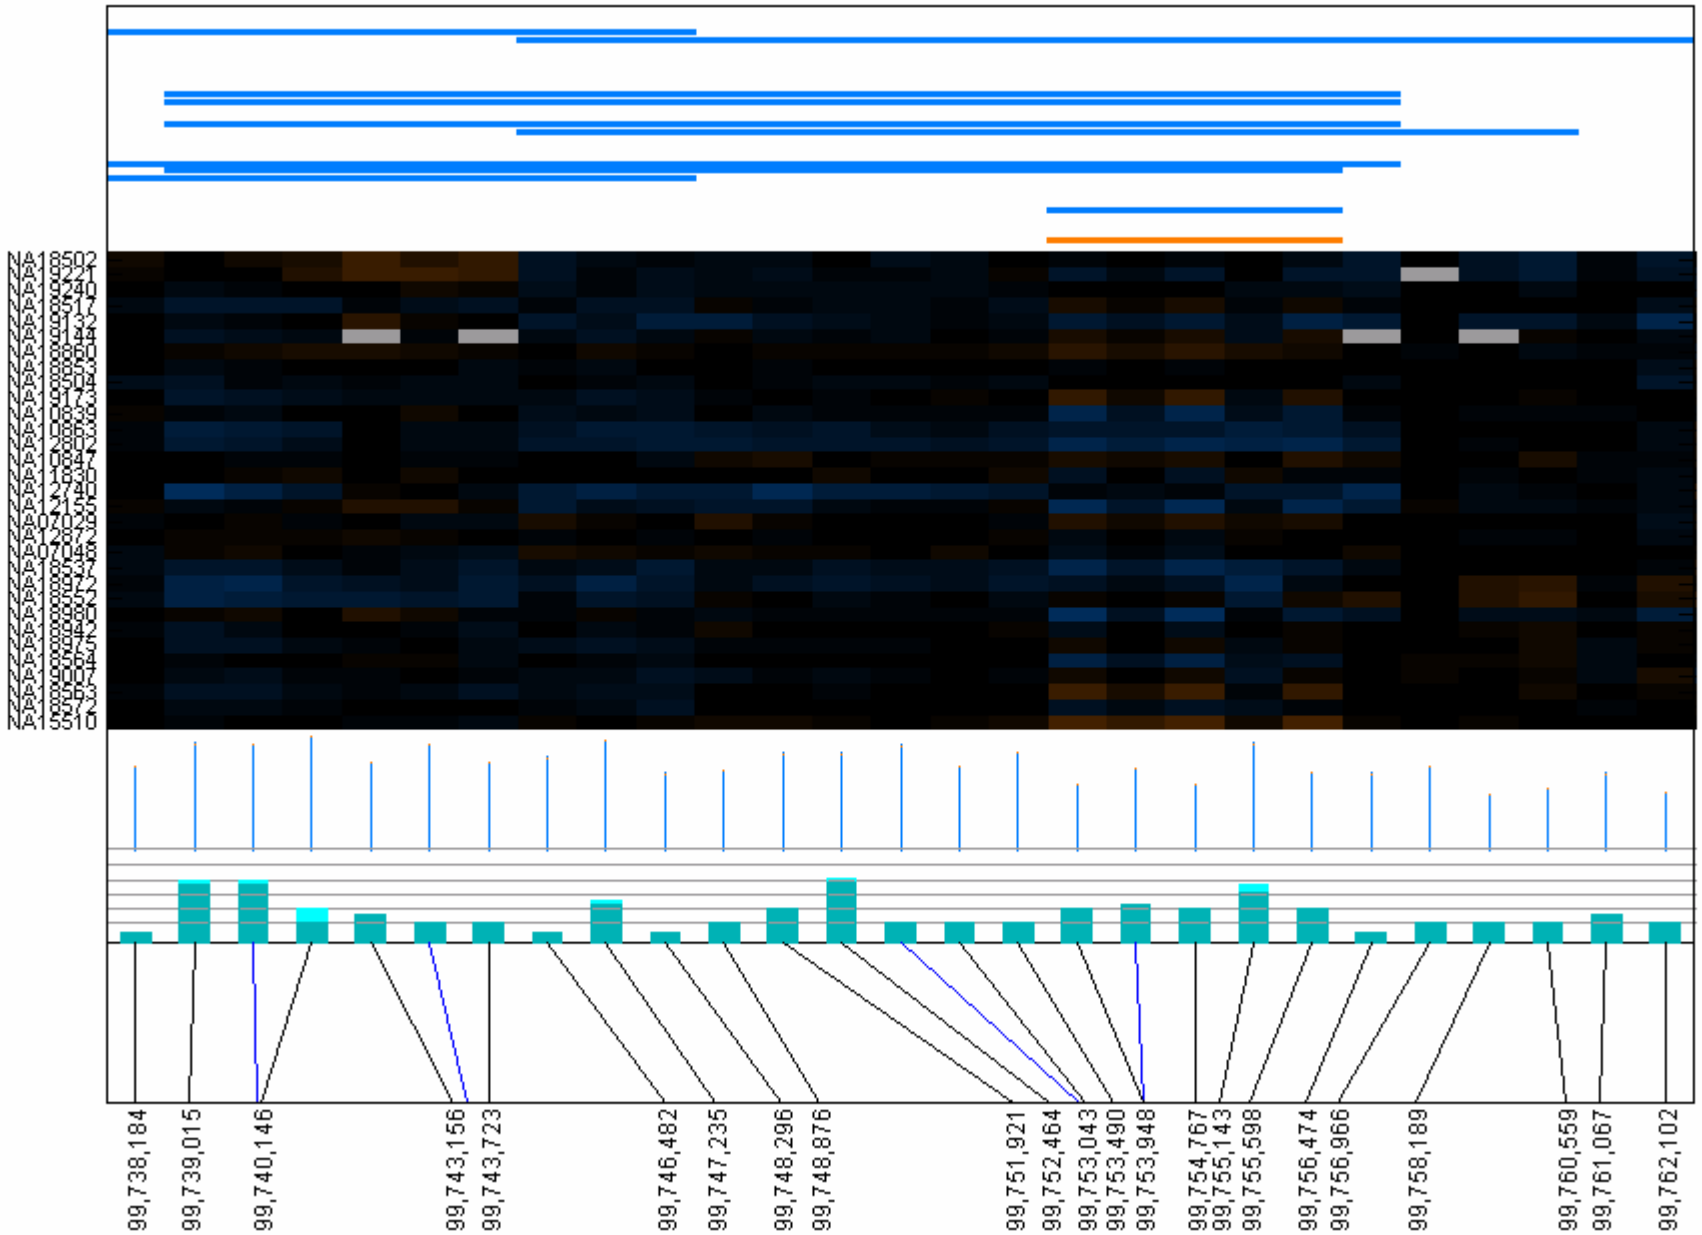

# chr6:000201415-000329127

chr6:000201415-000329127

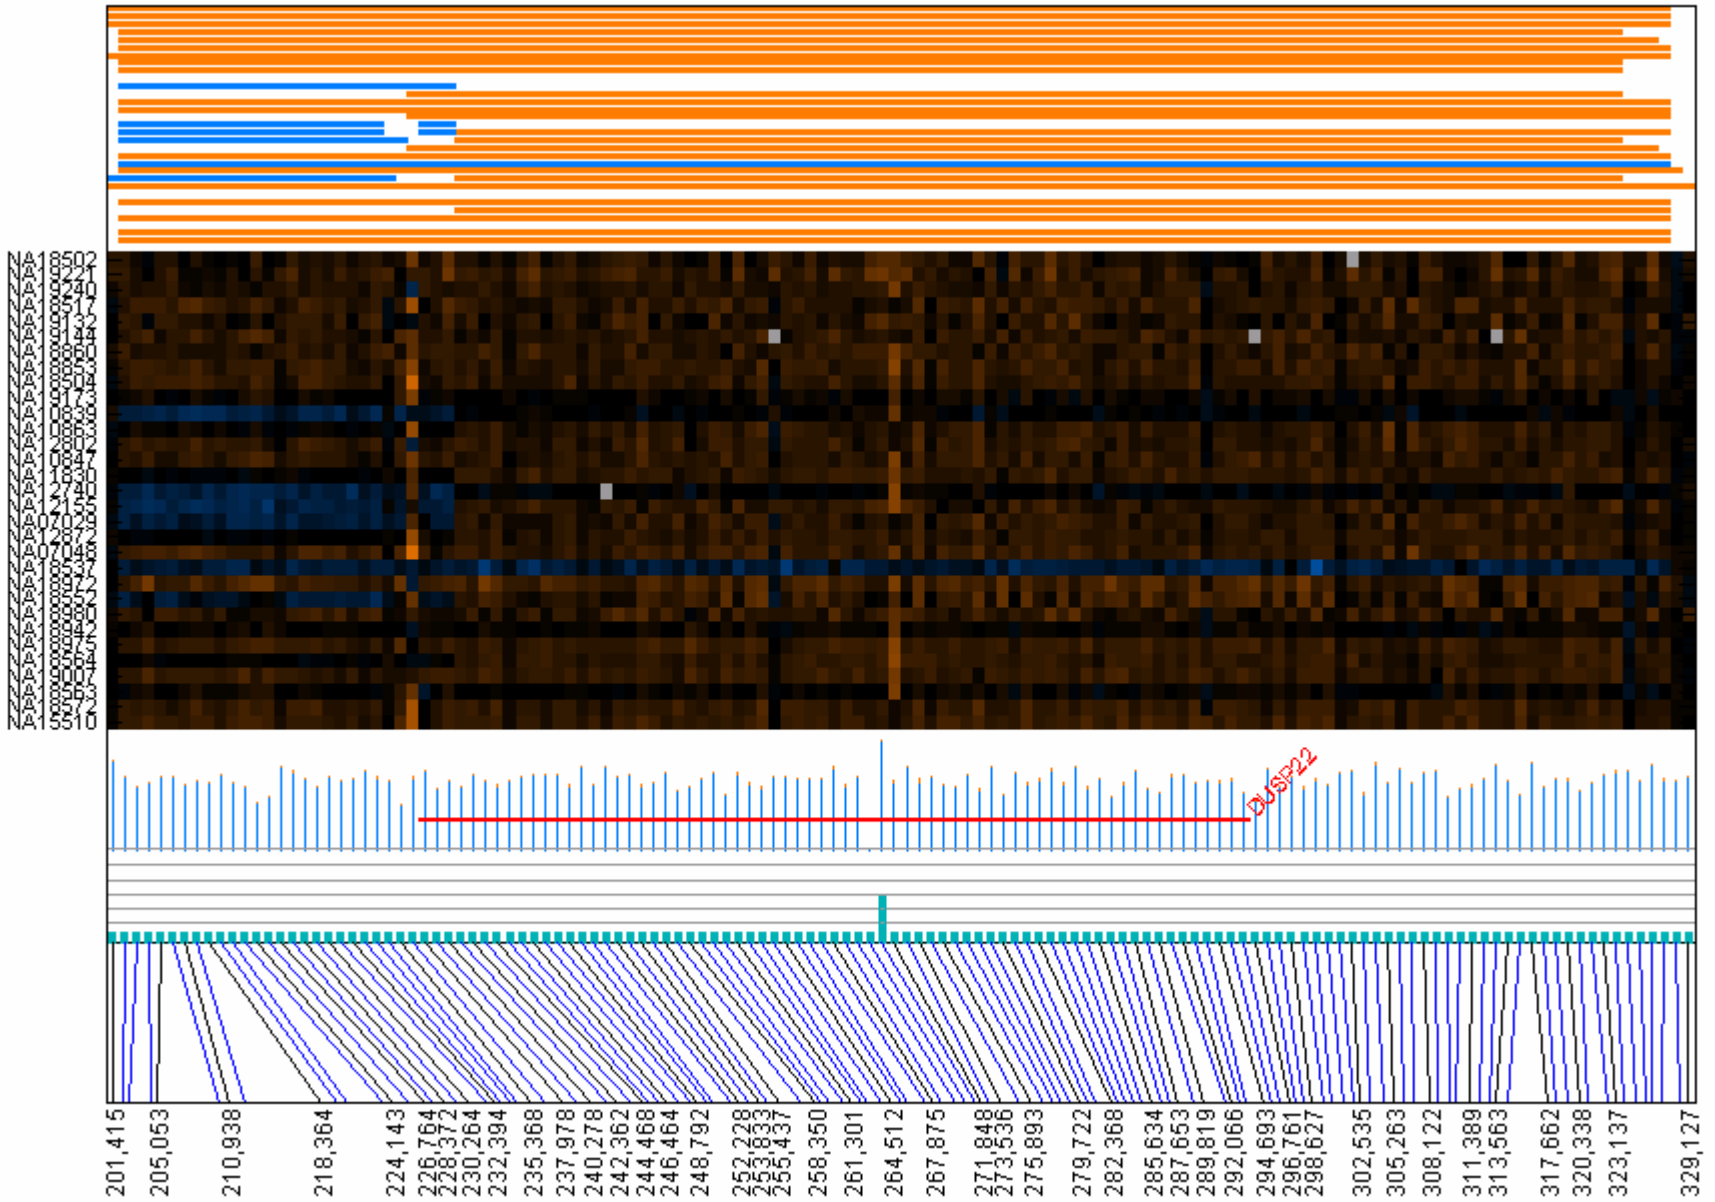

# chr6:026961231-027078543

chr6:026961231-027078543

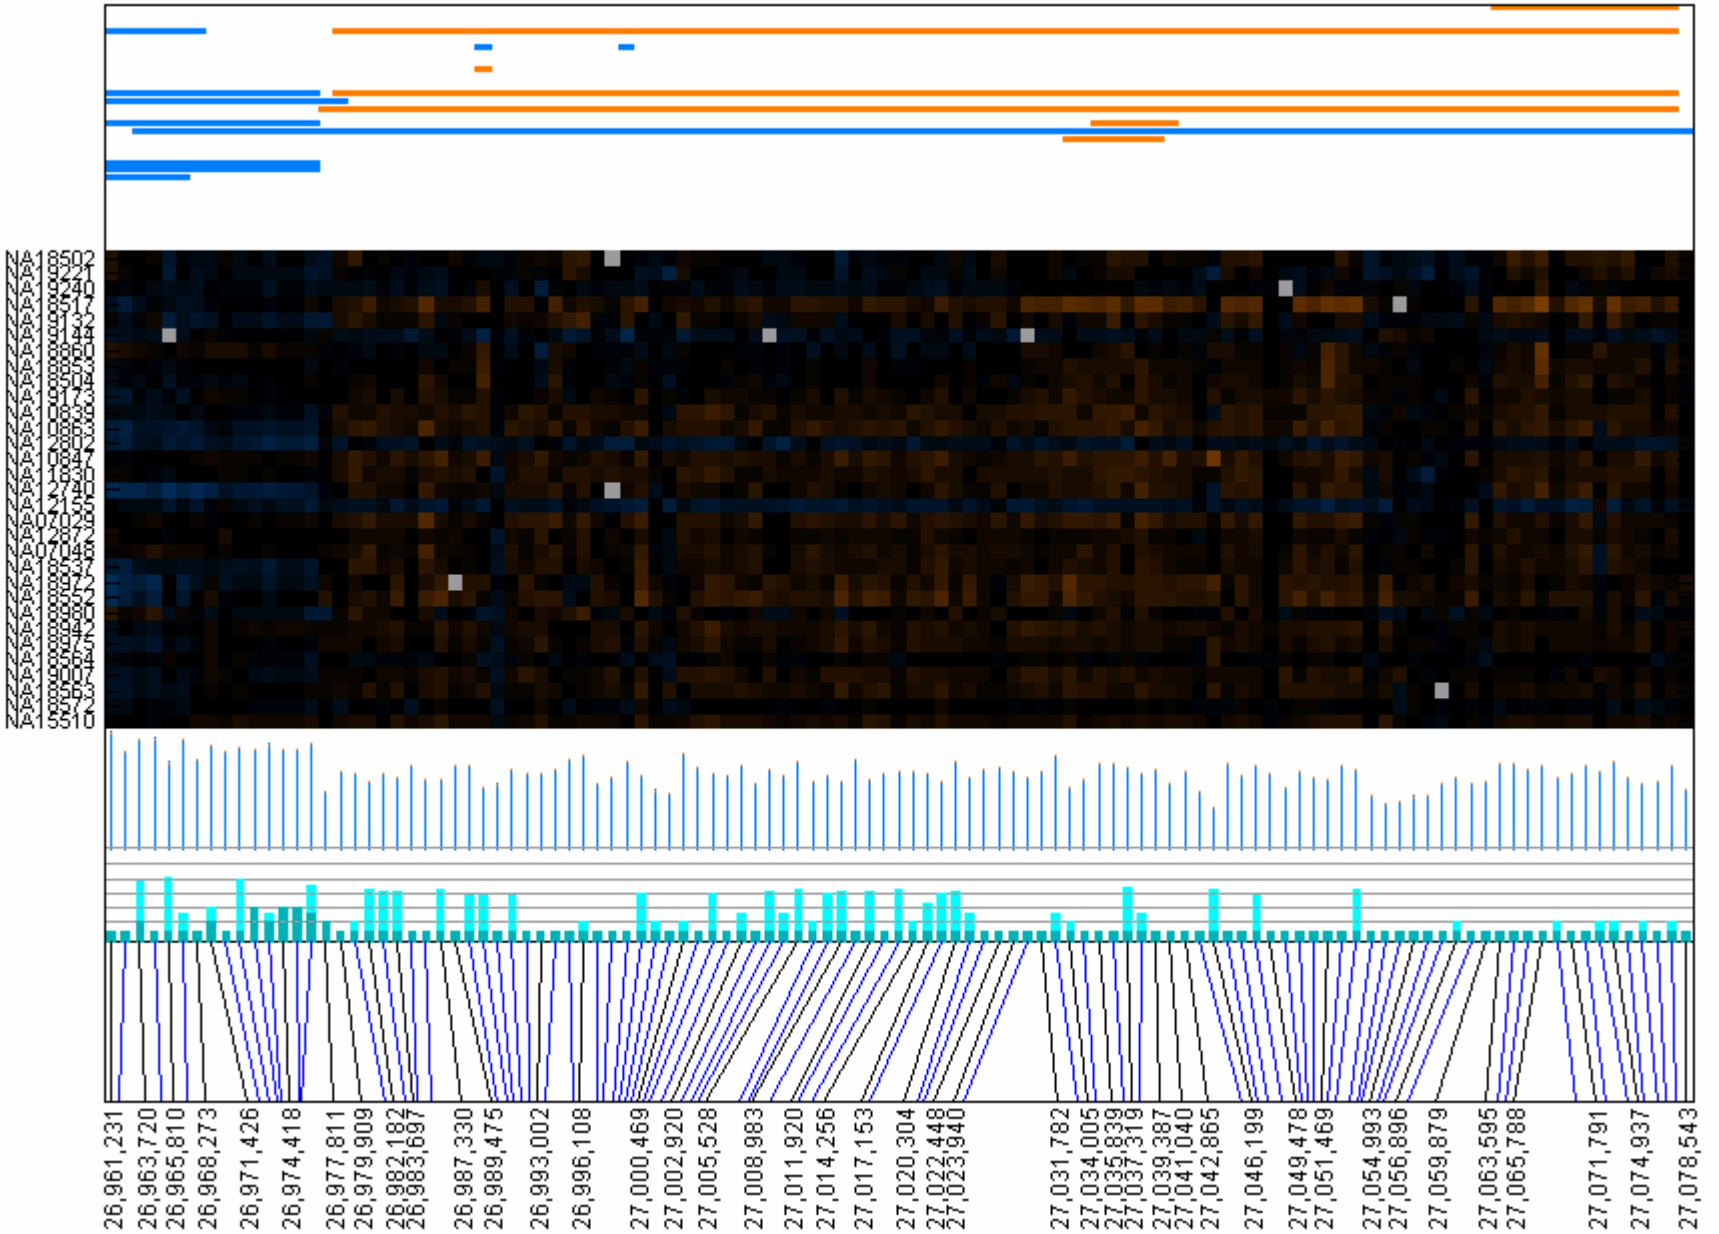

# chr6:032539084-032763101

chr6:032539084-032763101

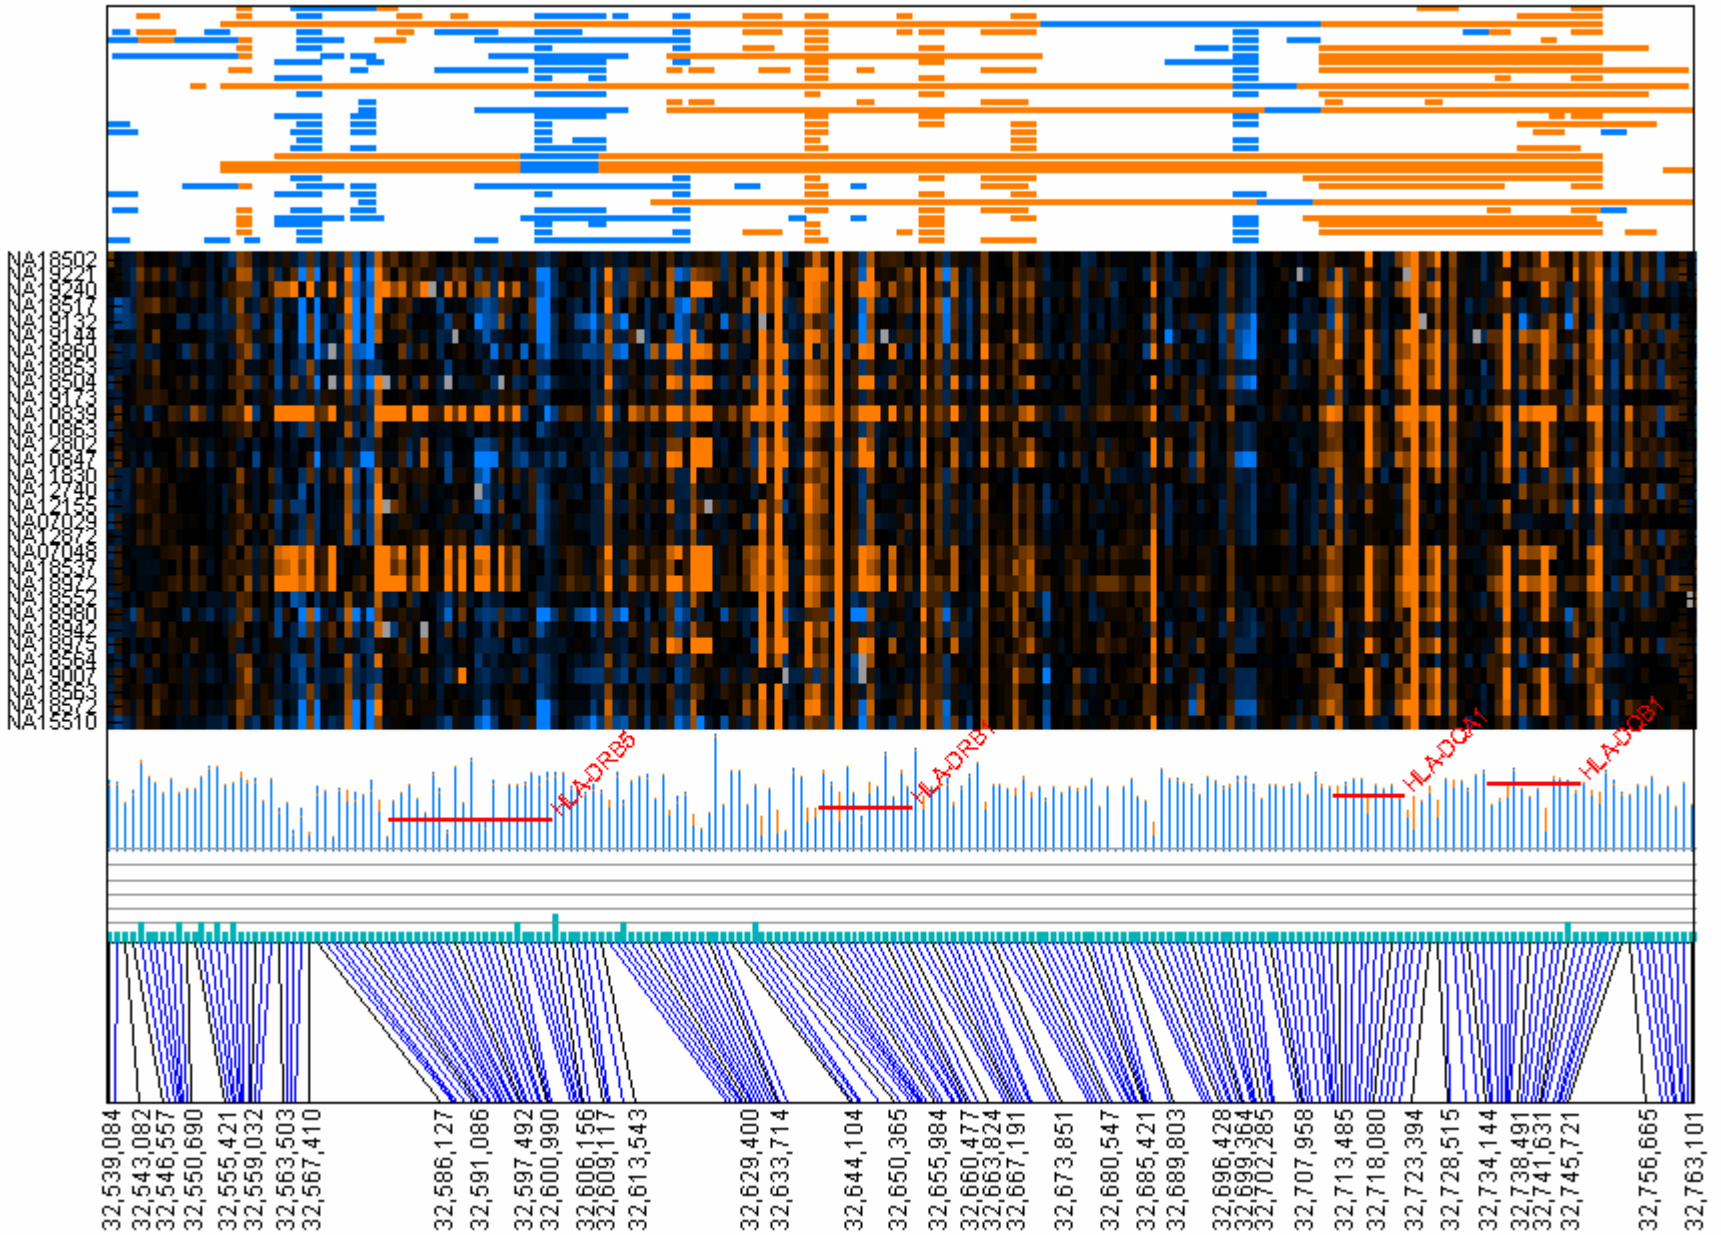



# chr6:054023636-054086623

chr6:054023636-054086623

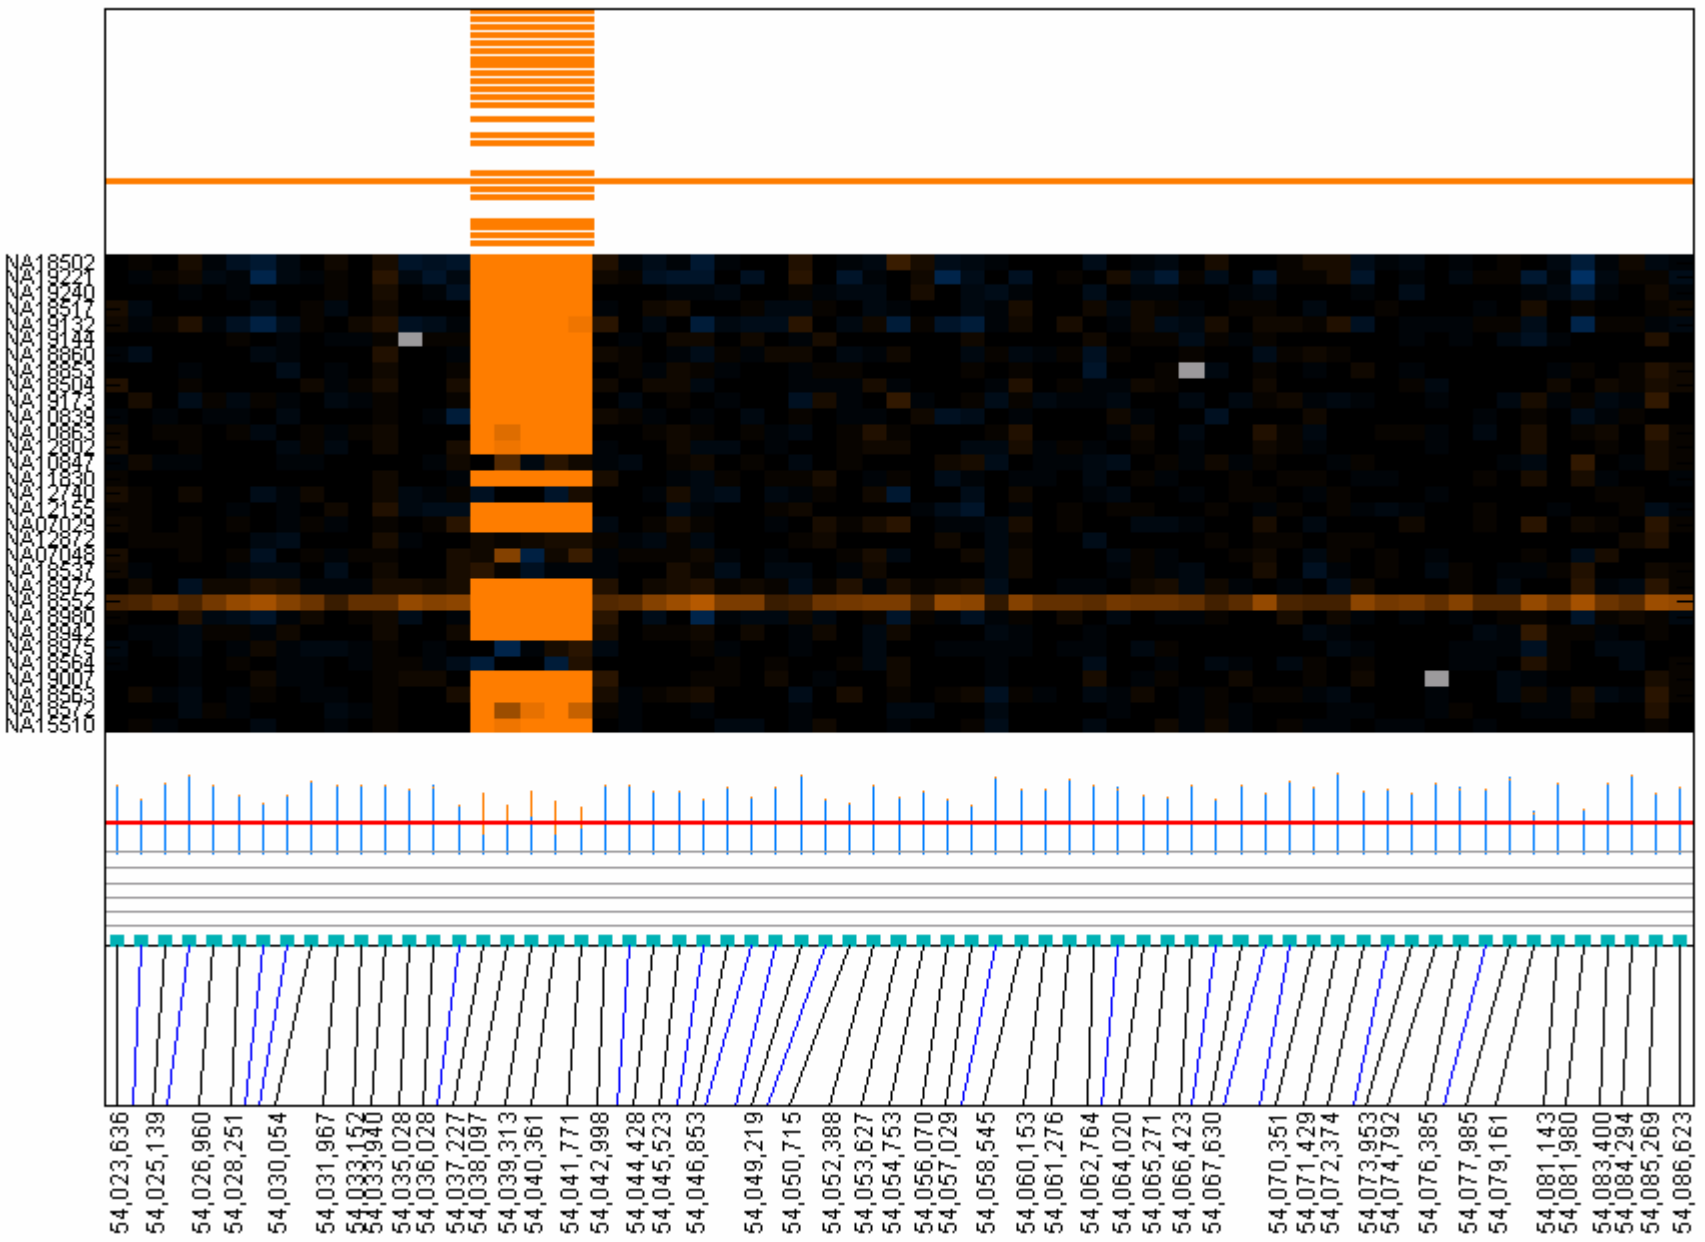

# chr6:170682667-170689182

chr6:170682667-170689182

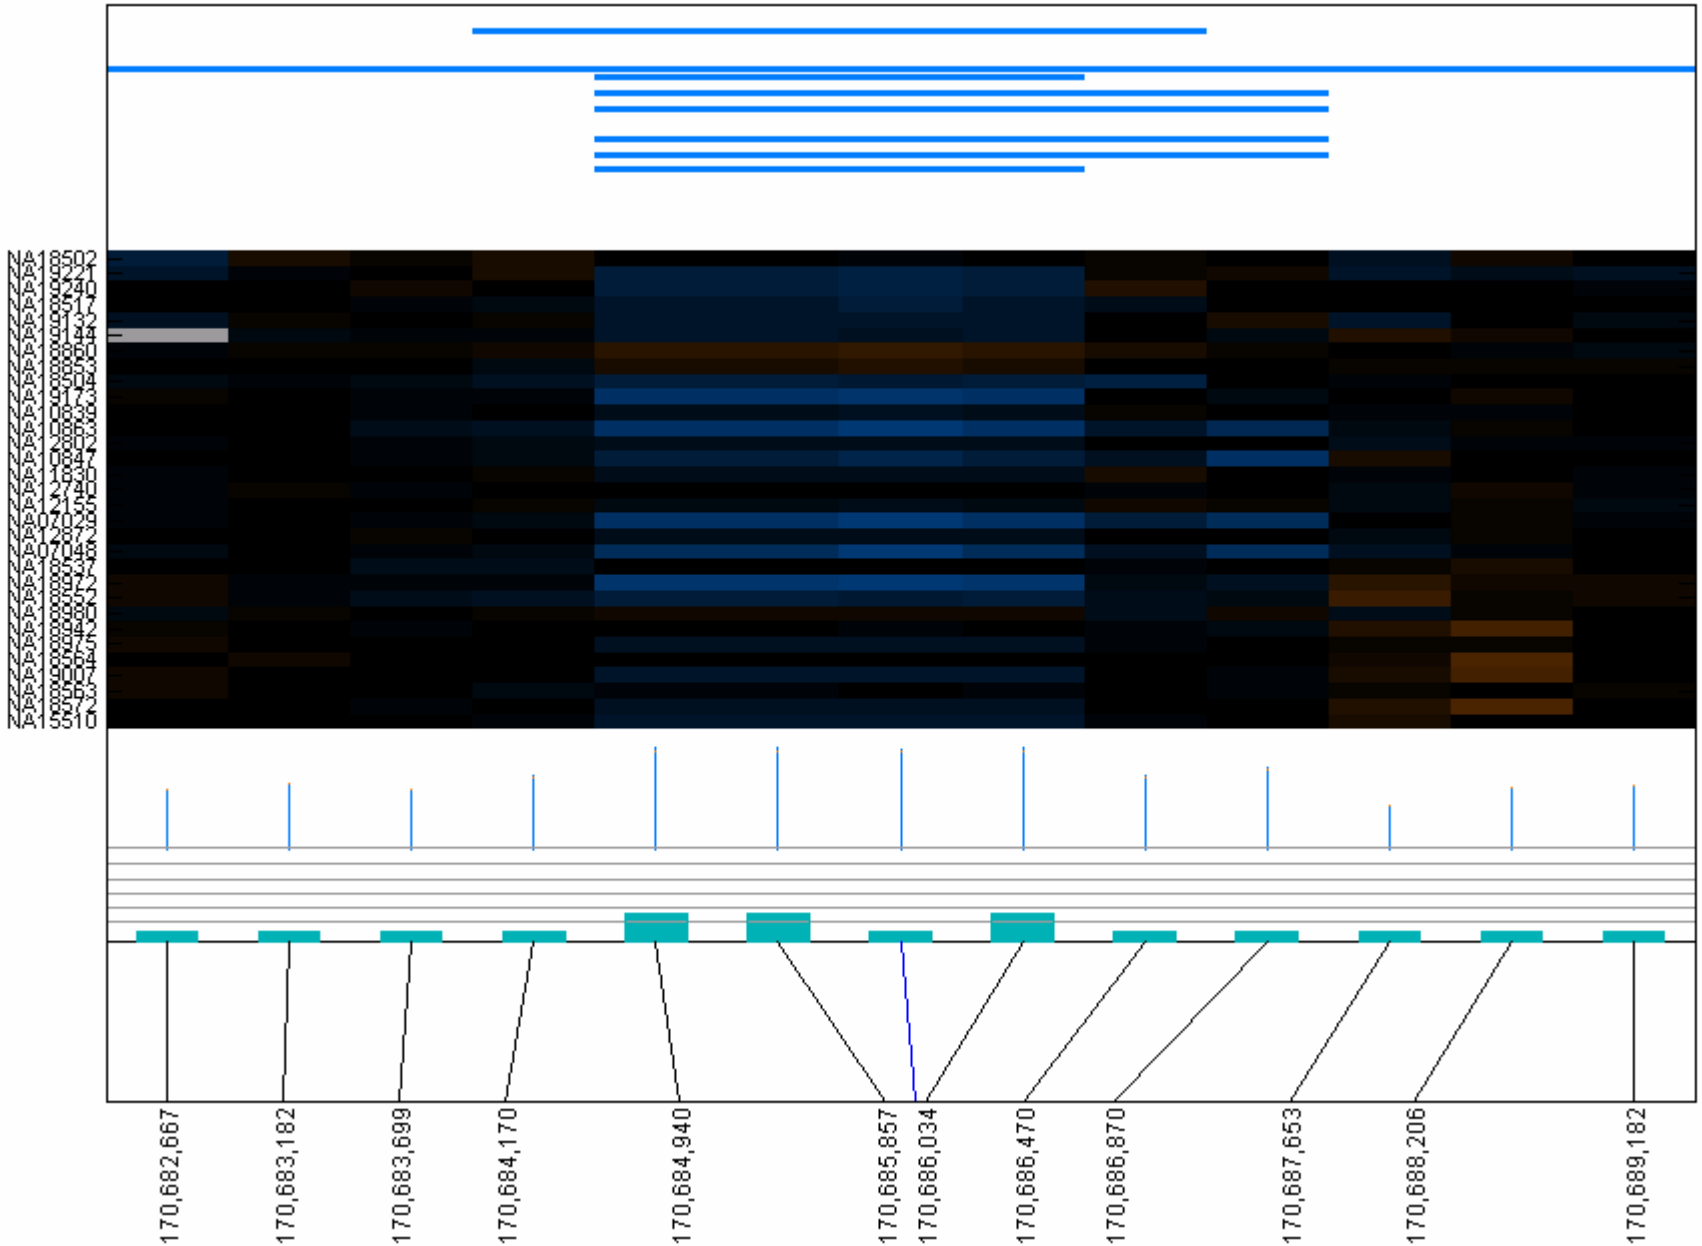

# chr7:003166463-003242820

chr7:003166463-003242820

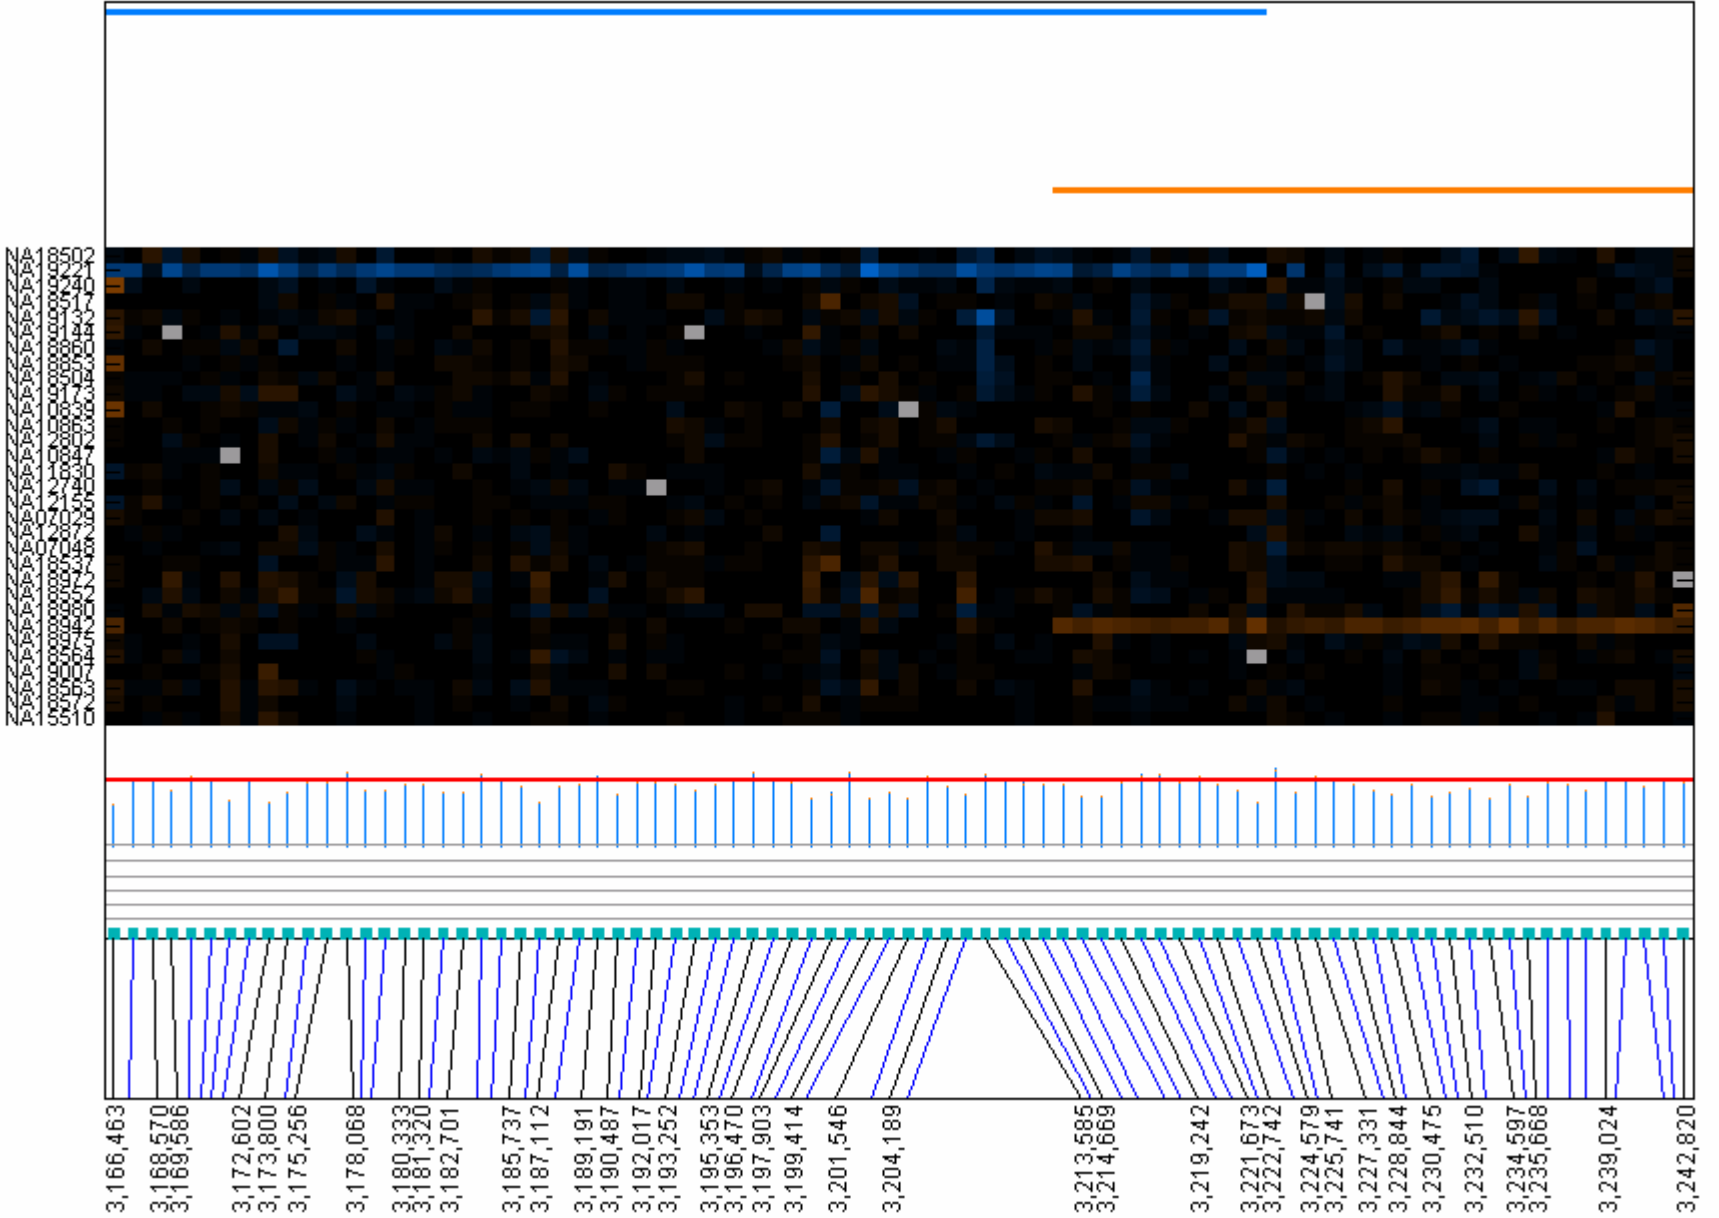

# chr7:012288802-012337381

chr7:012288802-012337381

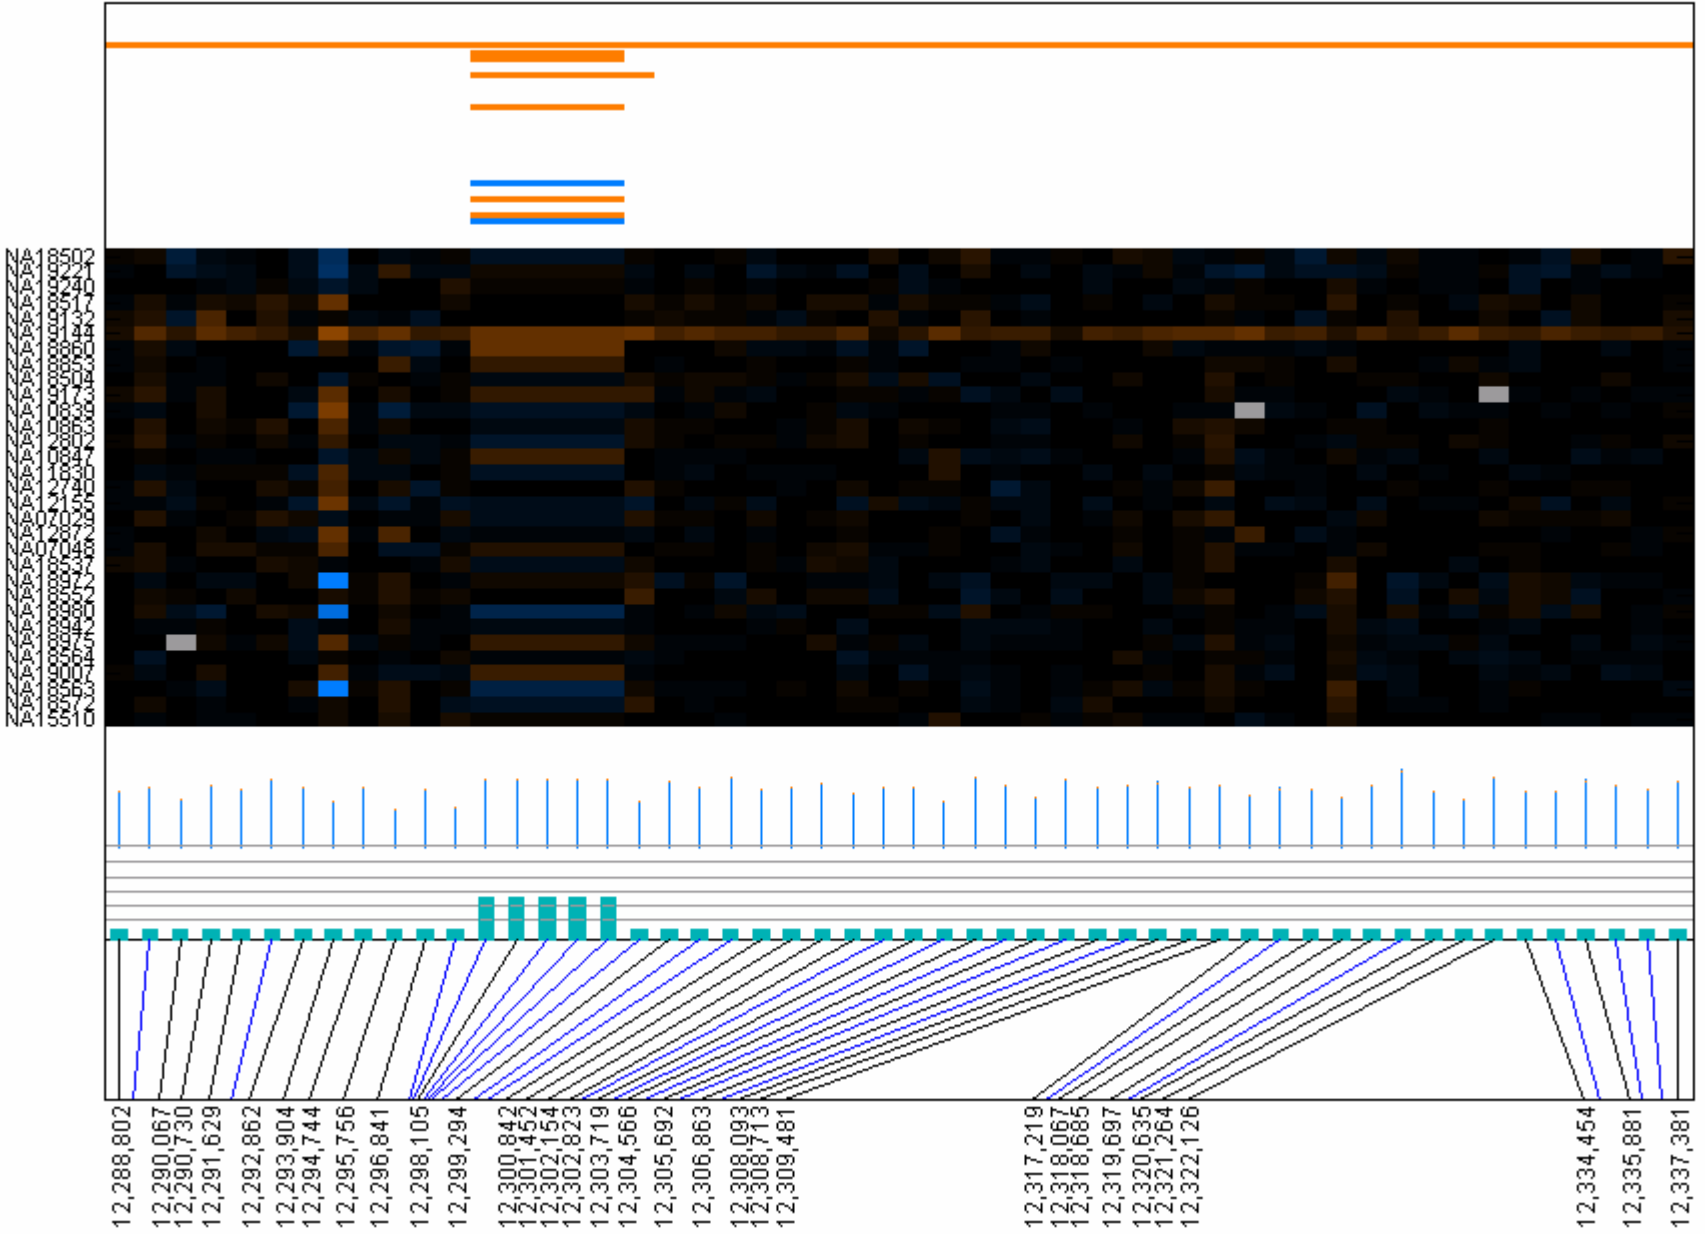

# chr7:061640742-062139439

chr7:061640742-062139439

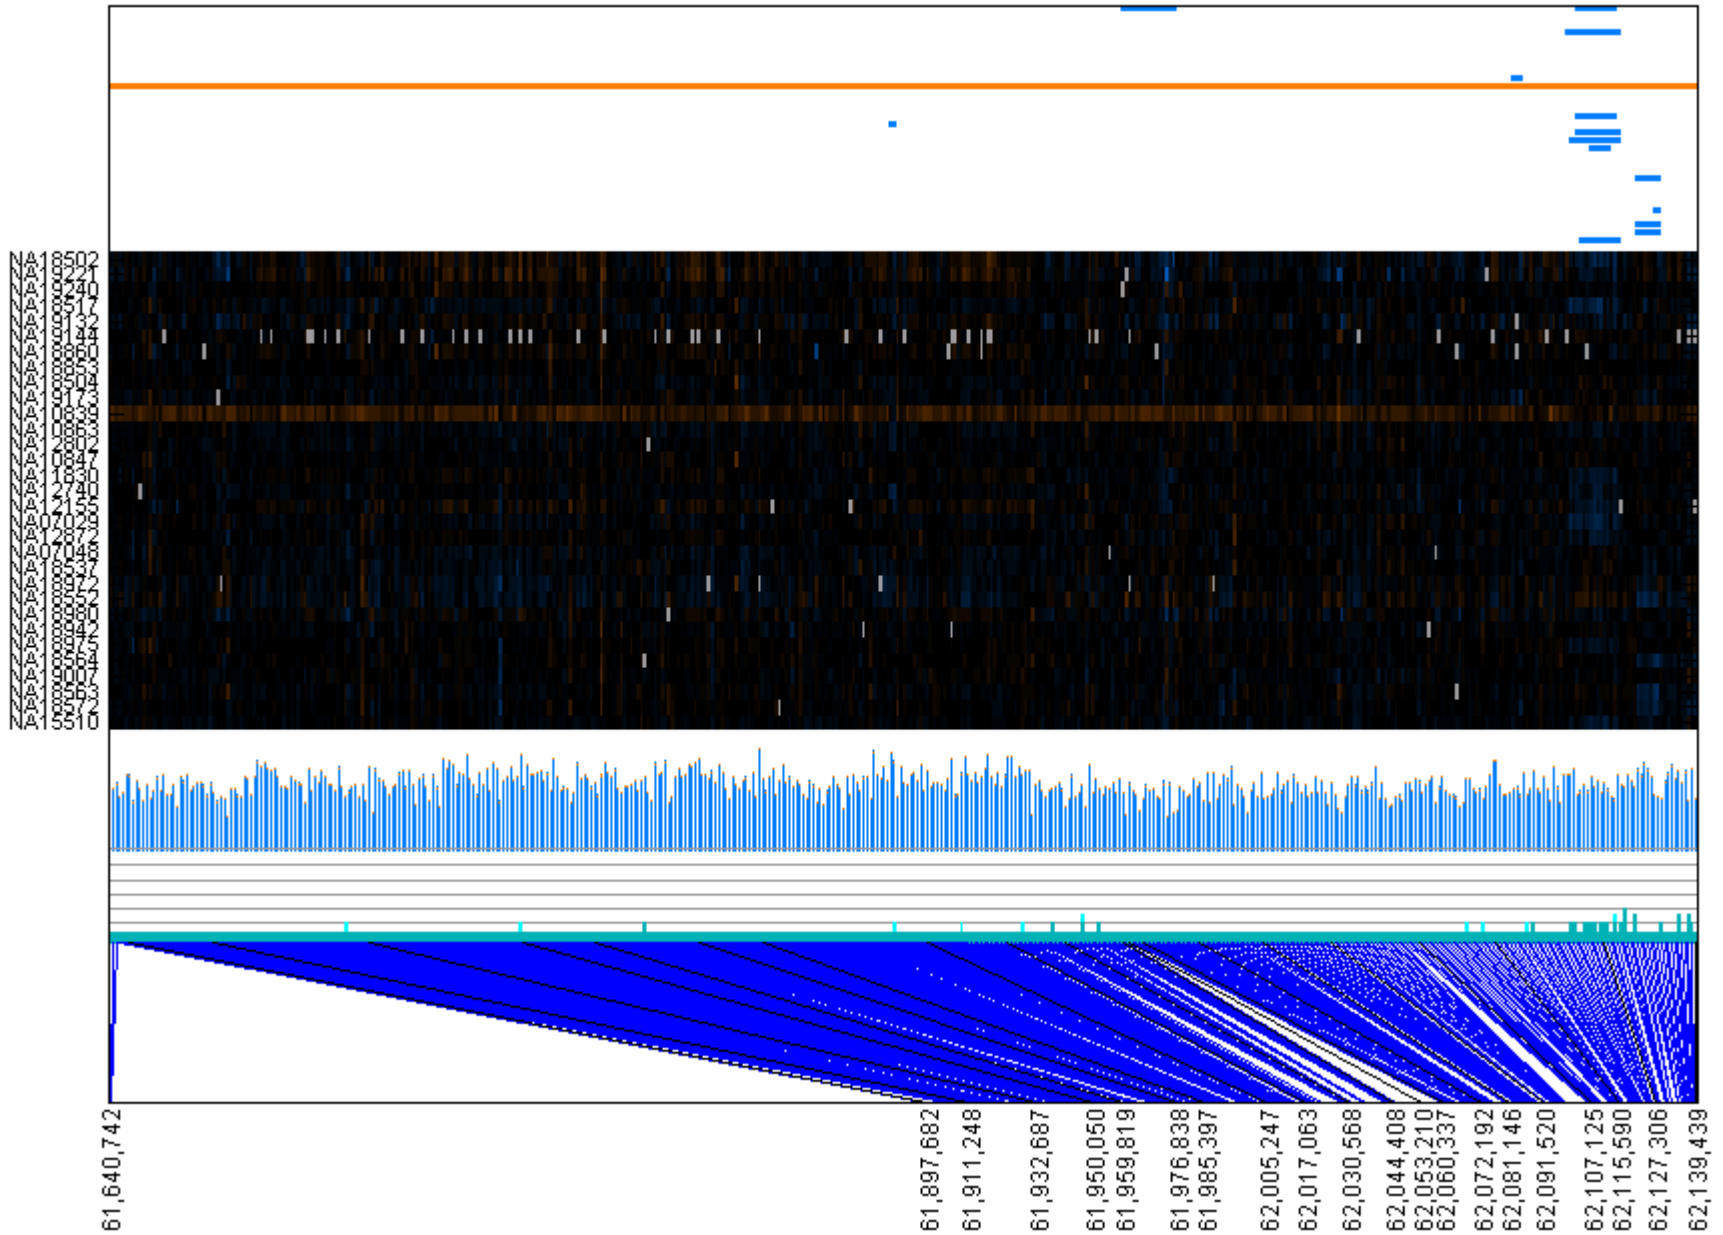



# chr7:062308978-062340148

chr7:062308978-062340148

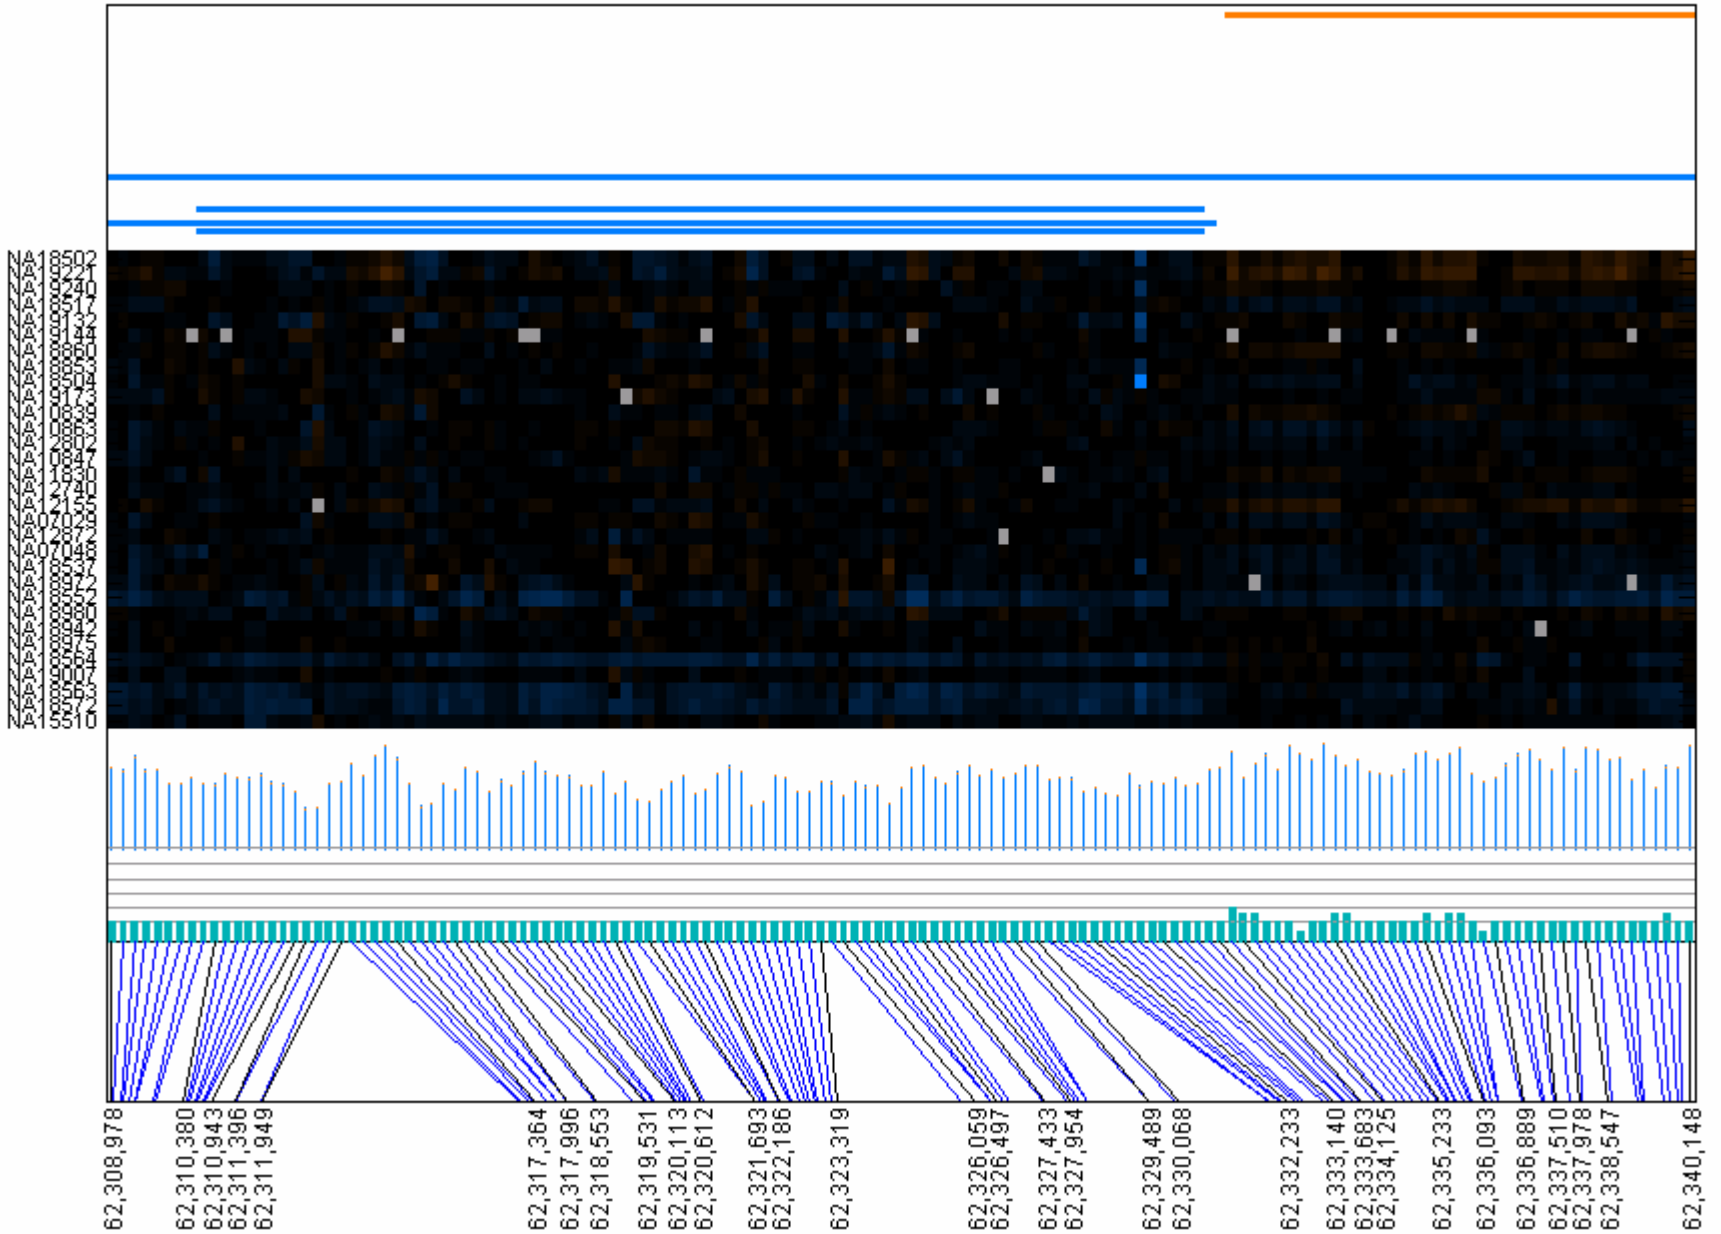

# chr7:074410404-074635745

chr7:074410404-074635745

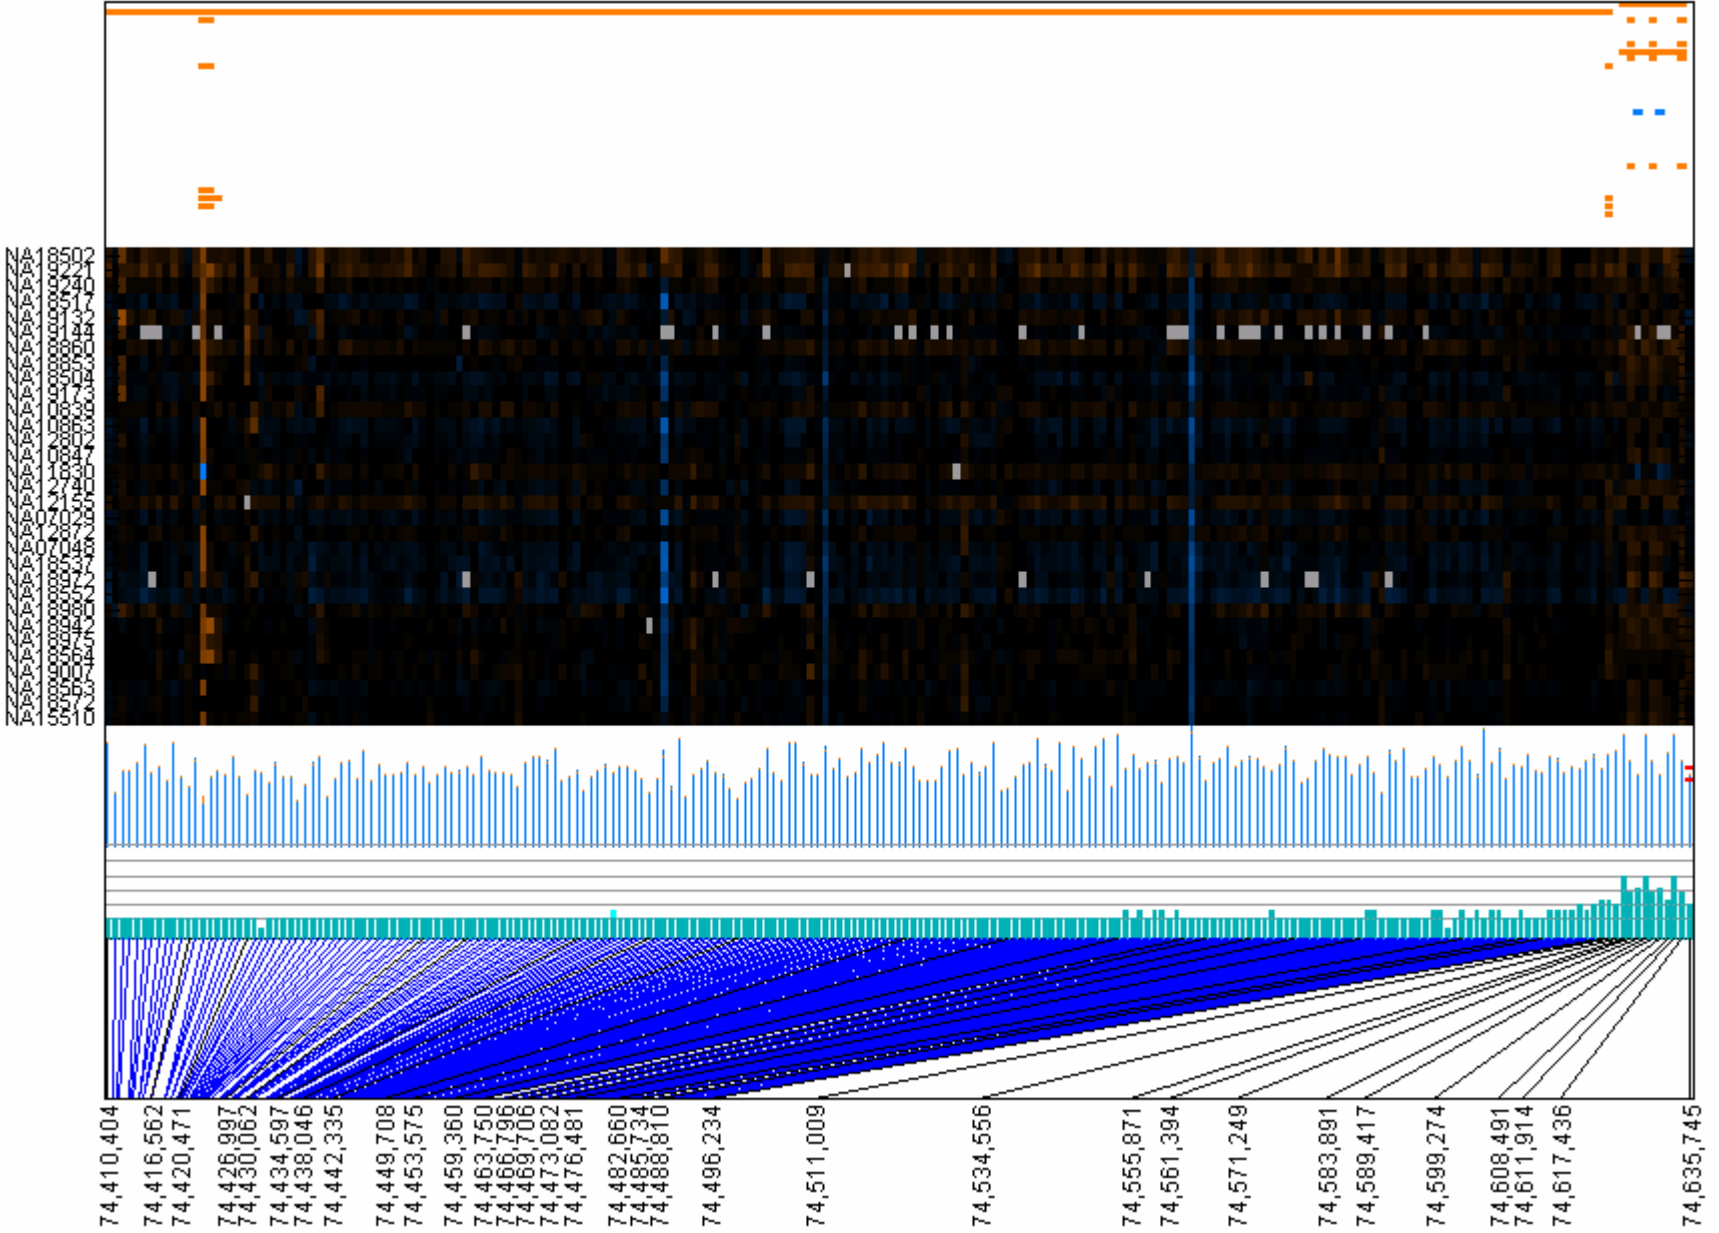



# chr7:141213157-141250935

chr7:141213157-141250935

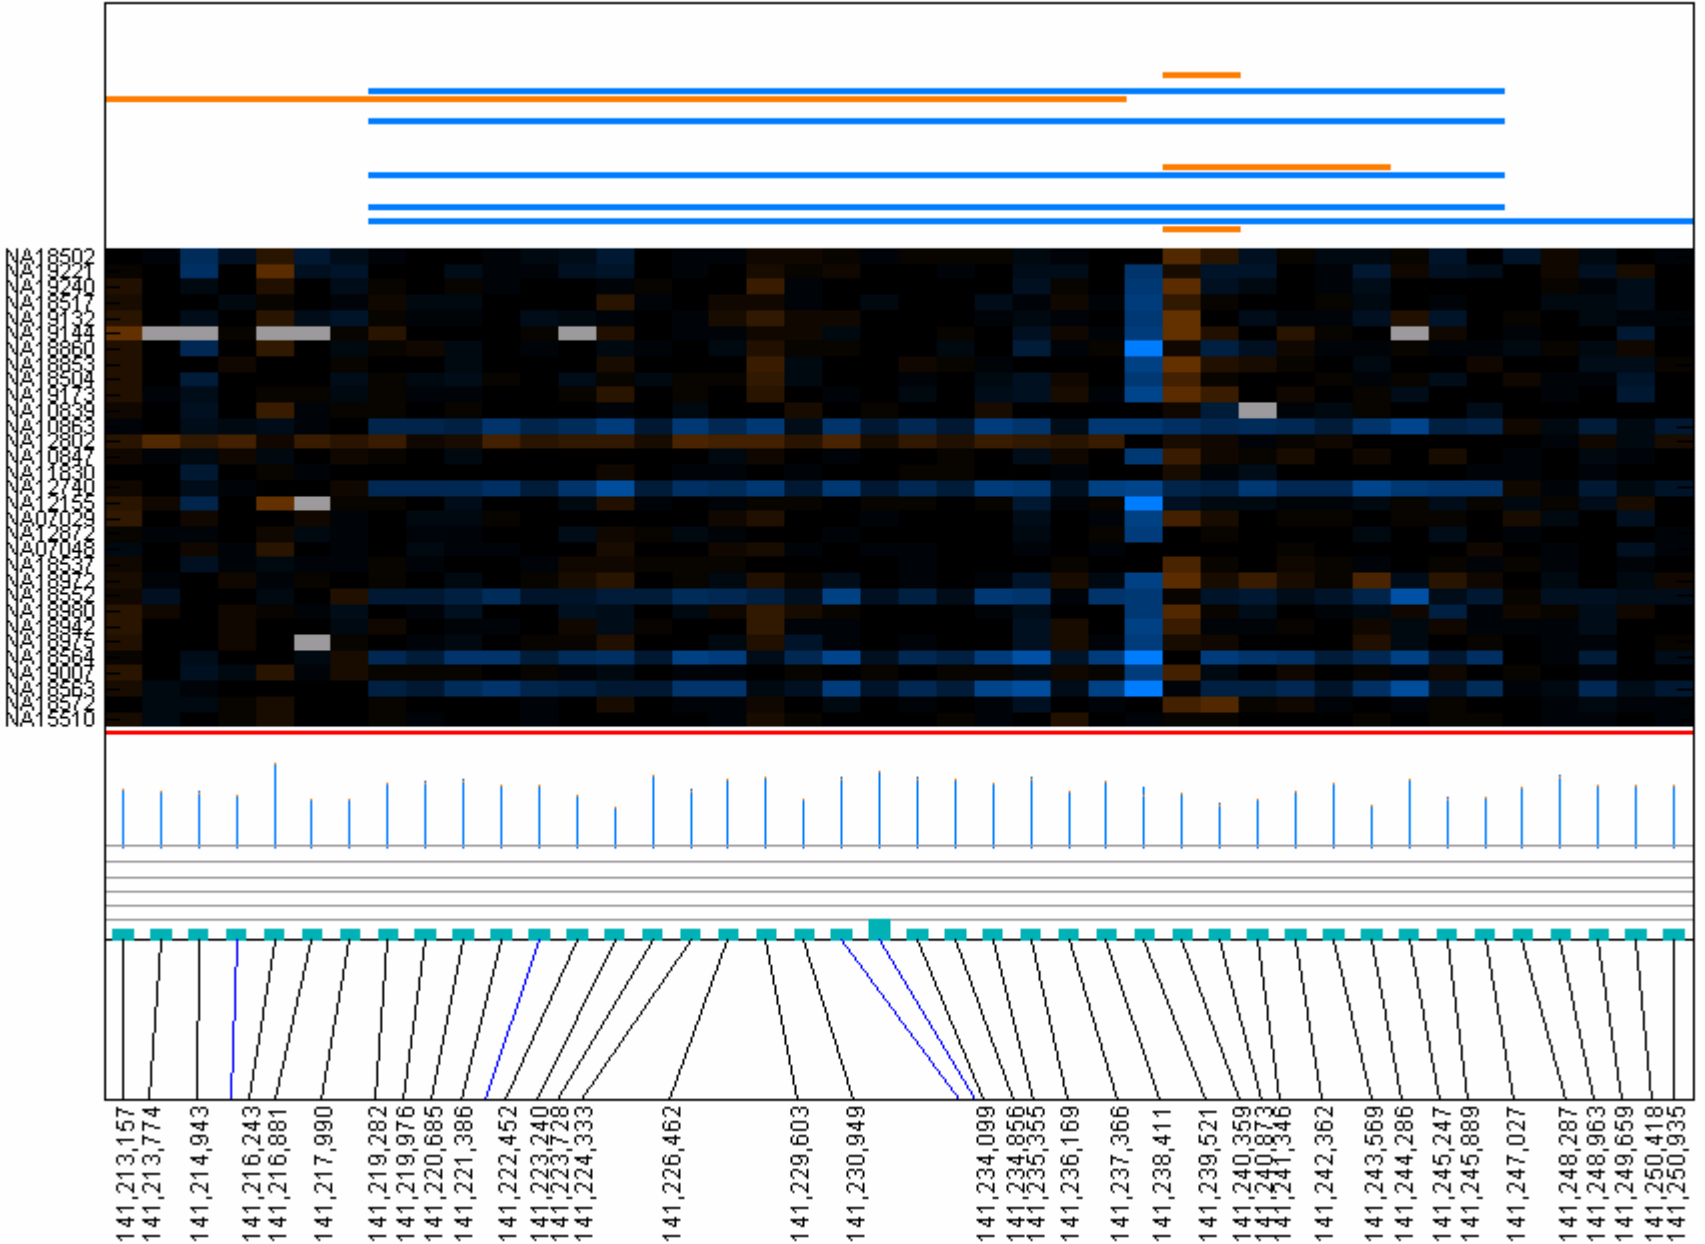

# chr7:142734133-143009099

chr7:142734133-143009099

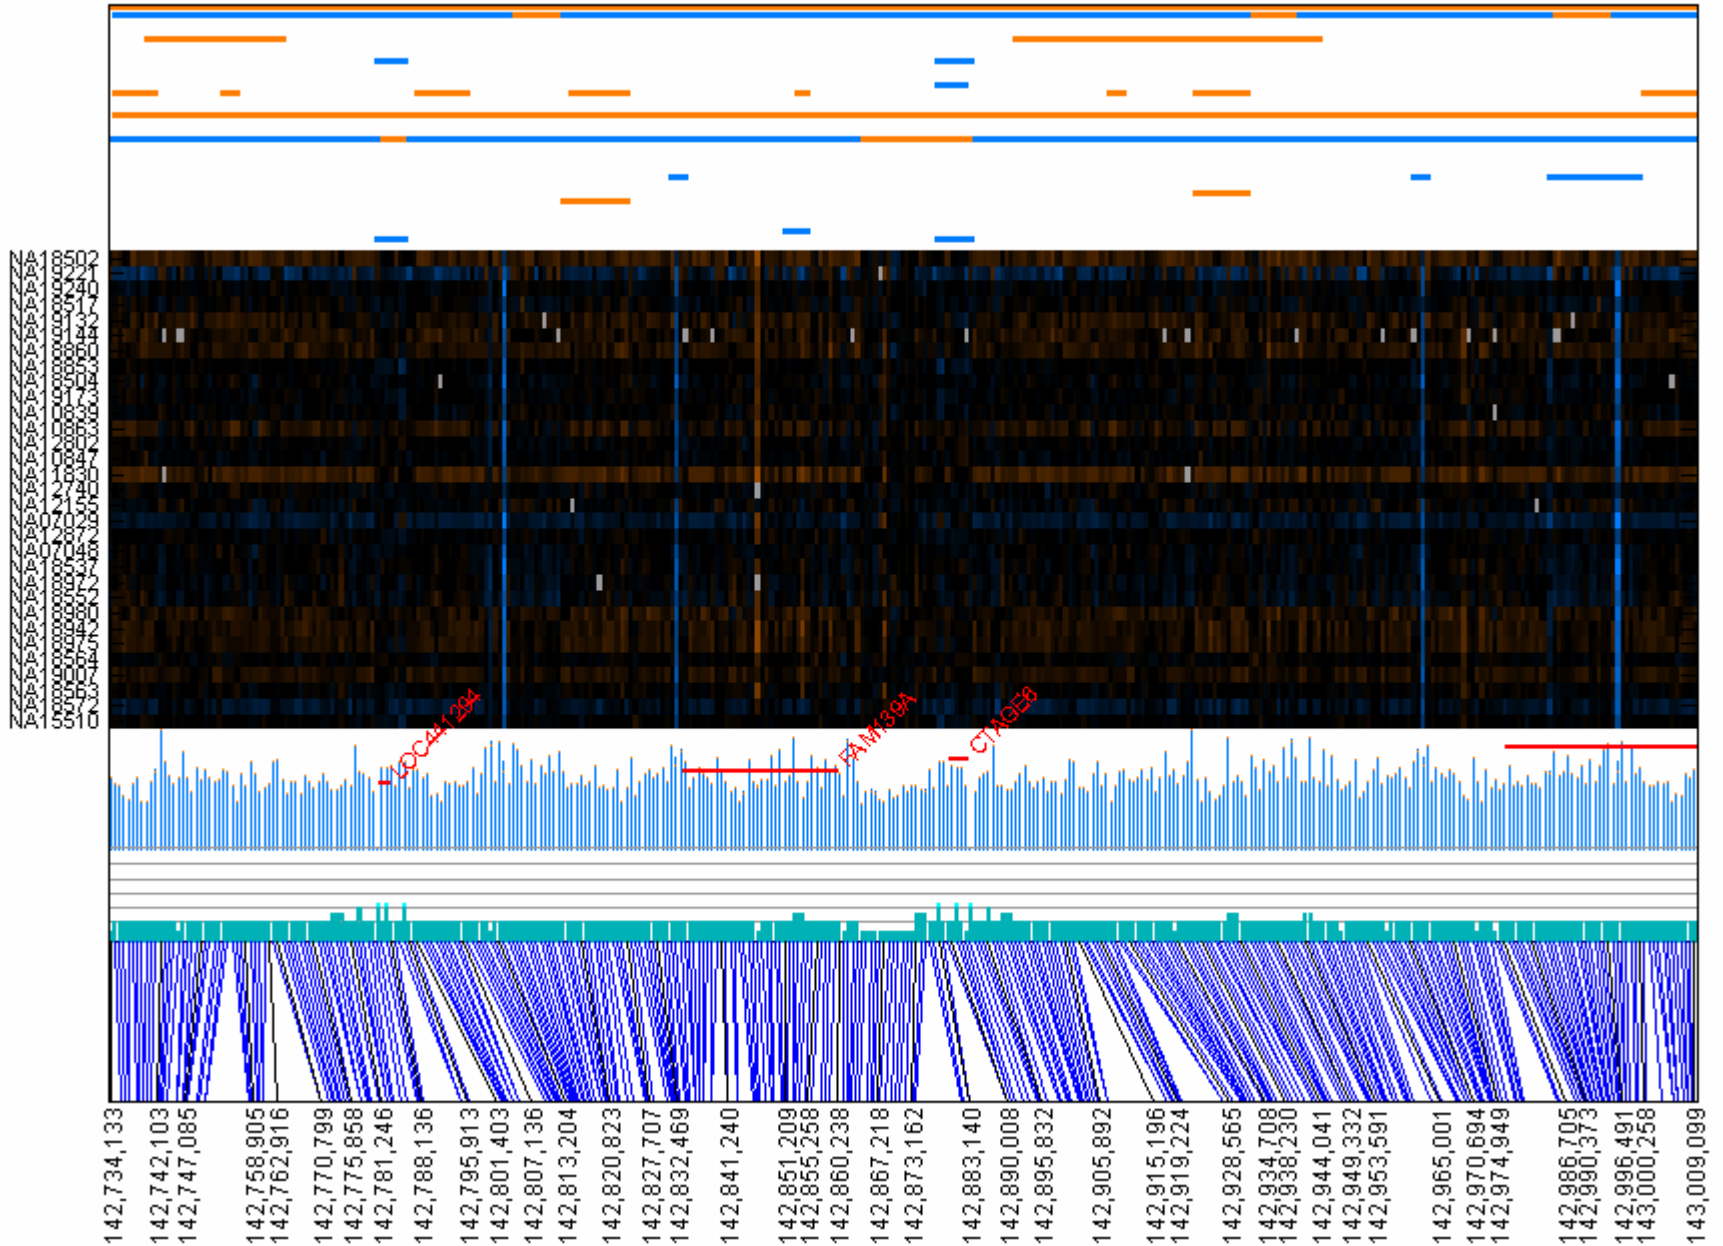

# chr7:143318031-143512168

chr7:143318031-143512168

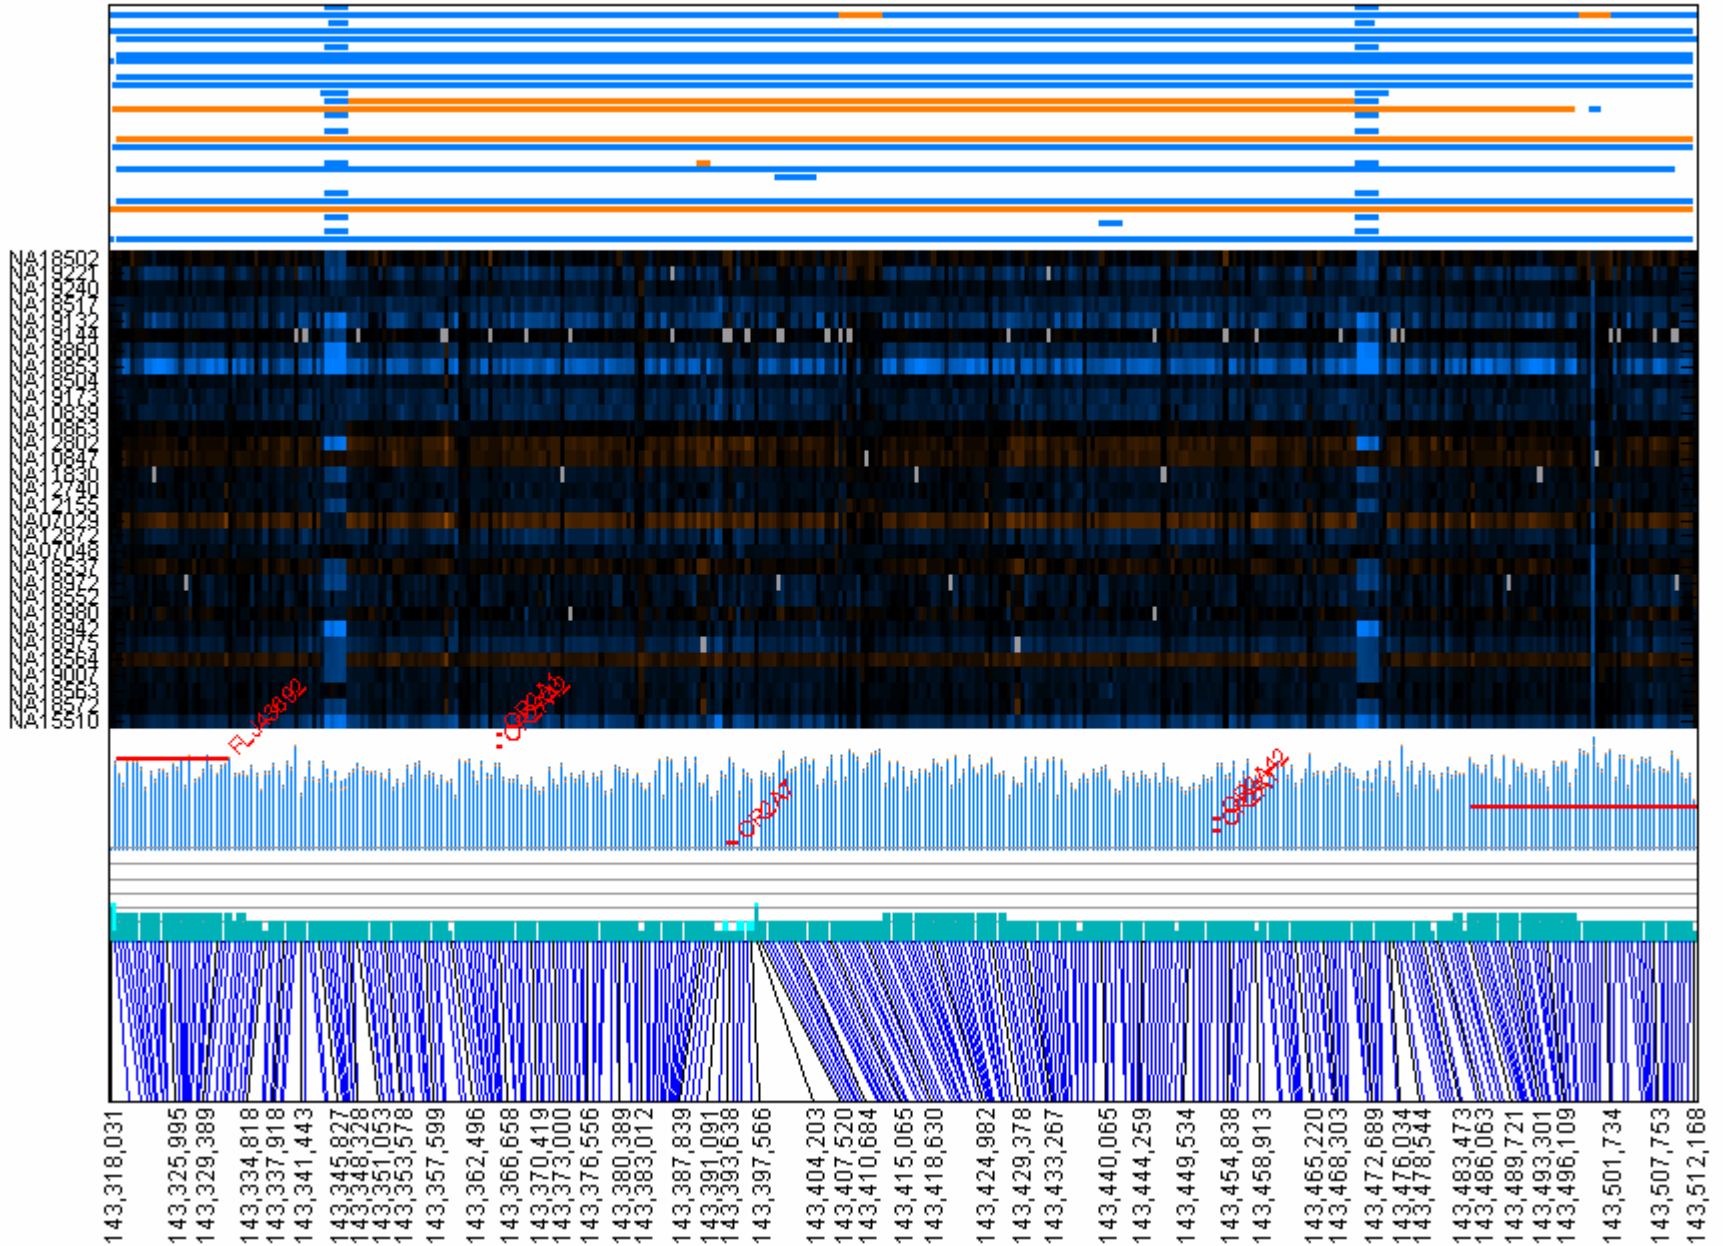

# chr7:148988160-149319432

chr7:148988160-149319432

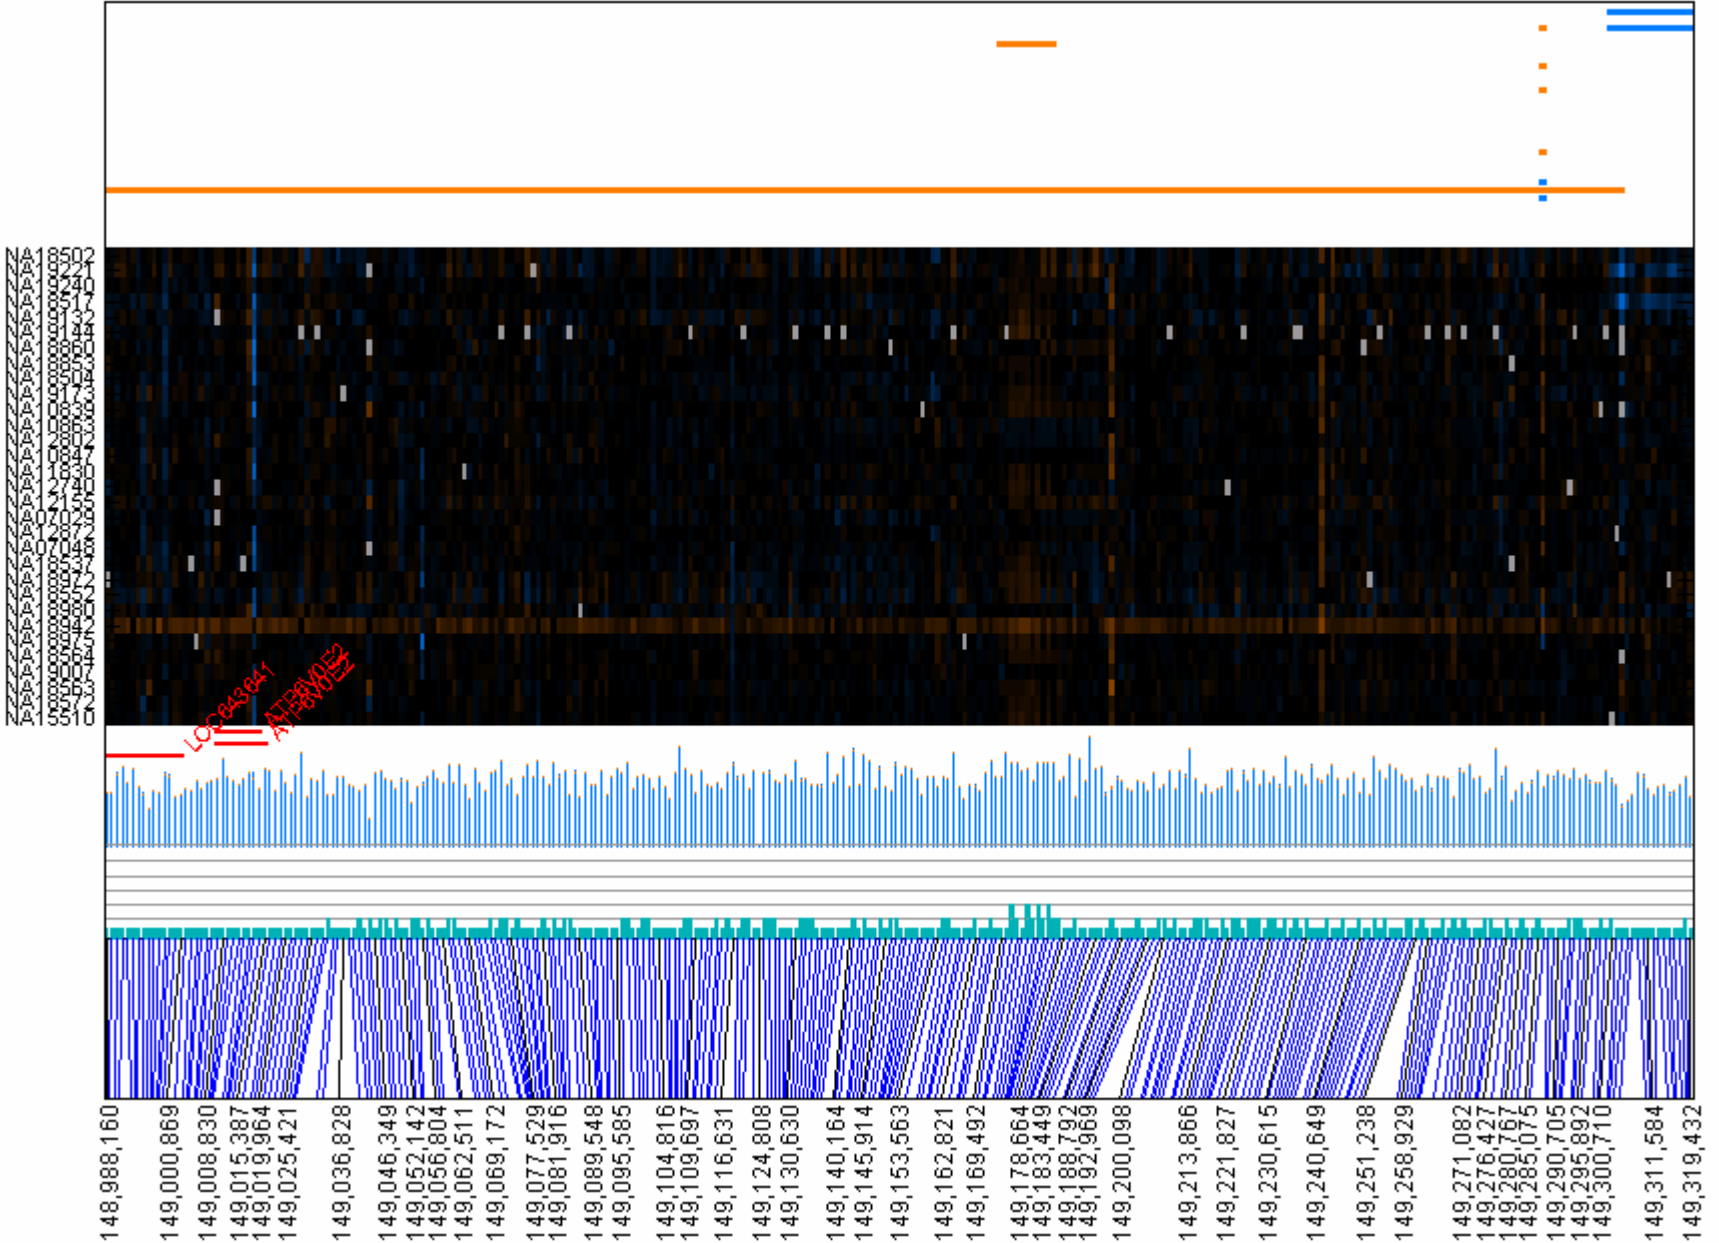

# chr7:152916616-153245987

chr7:152916616-153245987

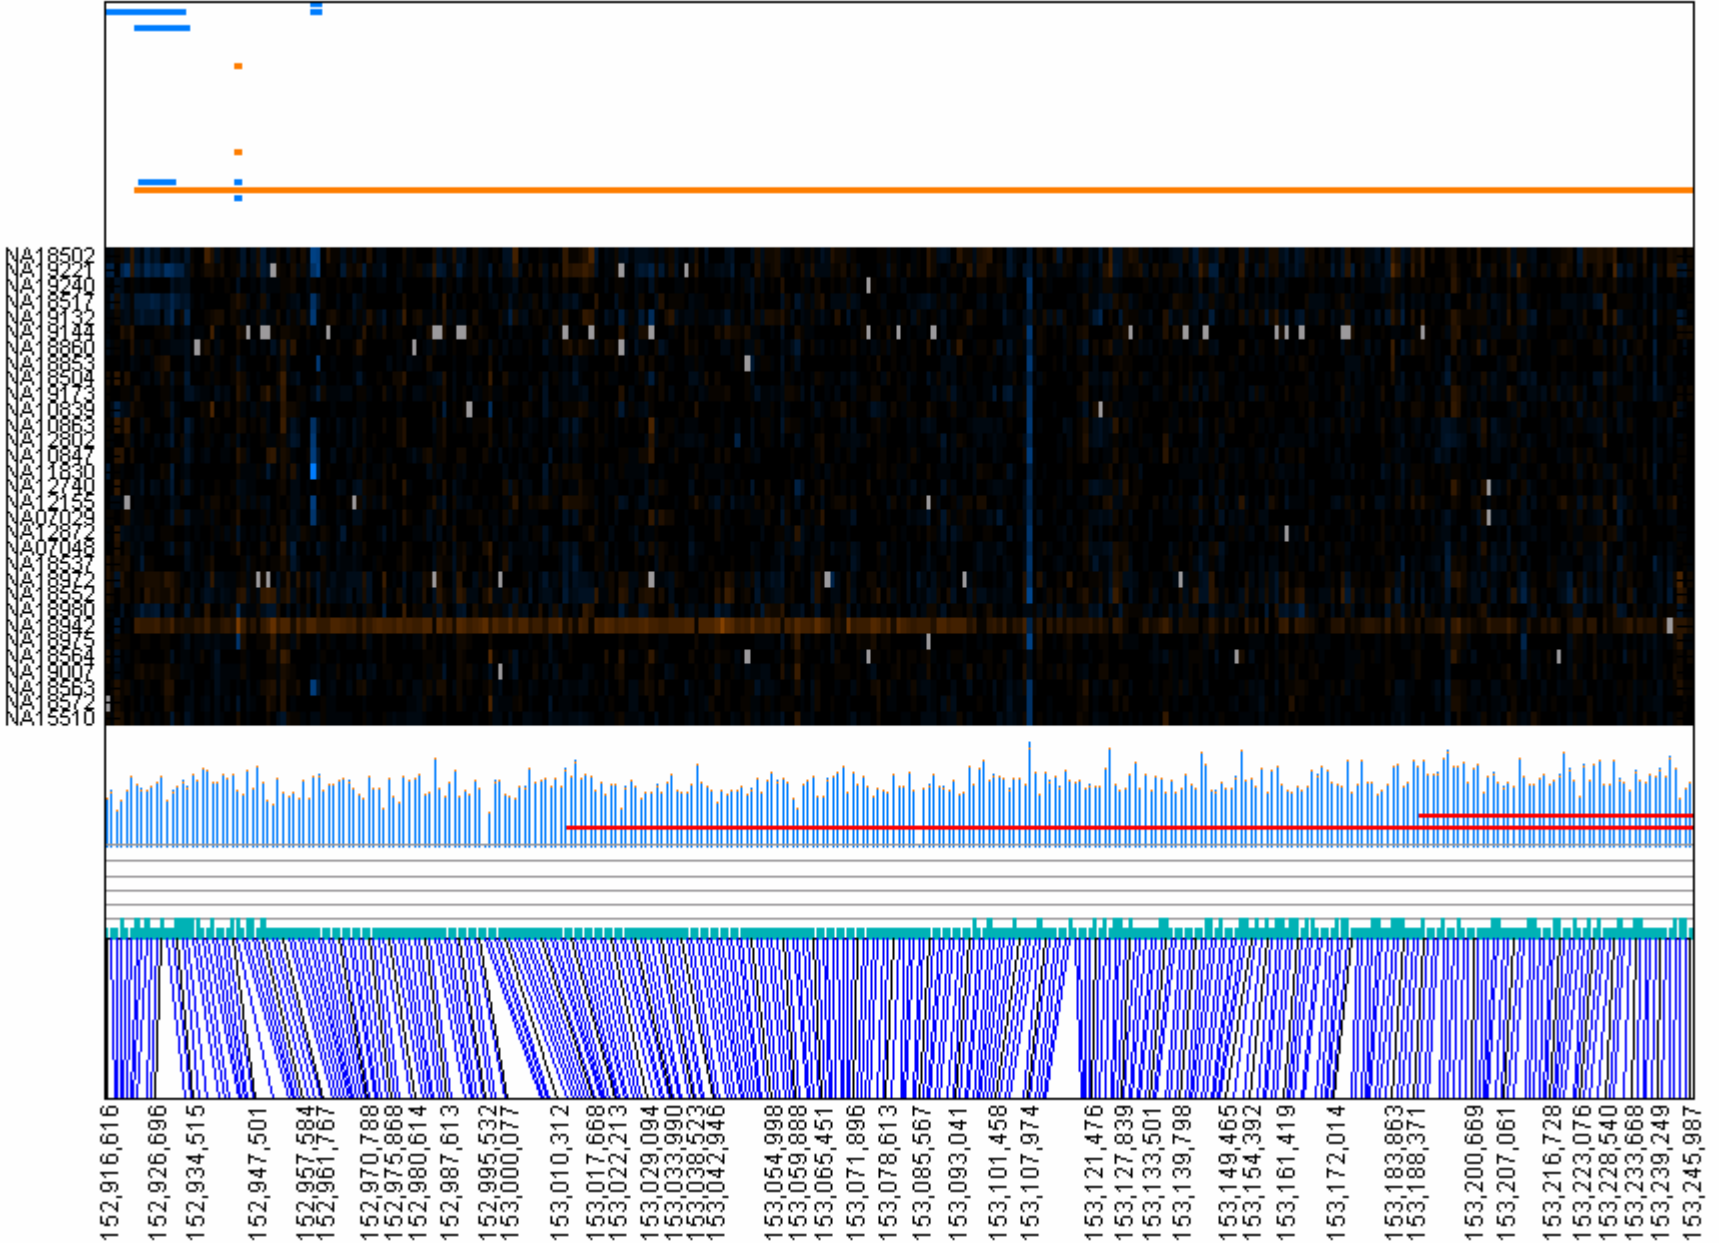

152,916,616  
152,926,696  
152,934,515  
152,947,501  
152,957,584  
152,961,767  
152,970,788  
152,975,868  
152,980,614  
152,987,613  
152,995,532  
153,000,077  
153,010,312  
153,017,668  
153,022,213  
153,029,094  
153,033,990  
153,038,523  
153,042,946  
153,054,998  
153,059,888  
153,065,451  
153,071,896  
153,078,613  
153,085,567  
153,093,041  
153,101,458  
153,107,974  
153,121,476  
153,127,839  
153,133,501  
153,139,798  
153,149,465  
153,154,392  
153,161,419  
153,172,014  
153,183,863  
153,188,371  
153,200,669  
153,207,061  
153,216,728  
153,223,076  
153,228,540  
153,233,668  
153,239,249  
153,245,987

# chr8:003674304-005930640

chr8:003674304-005930640

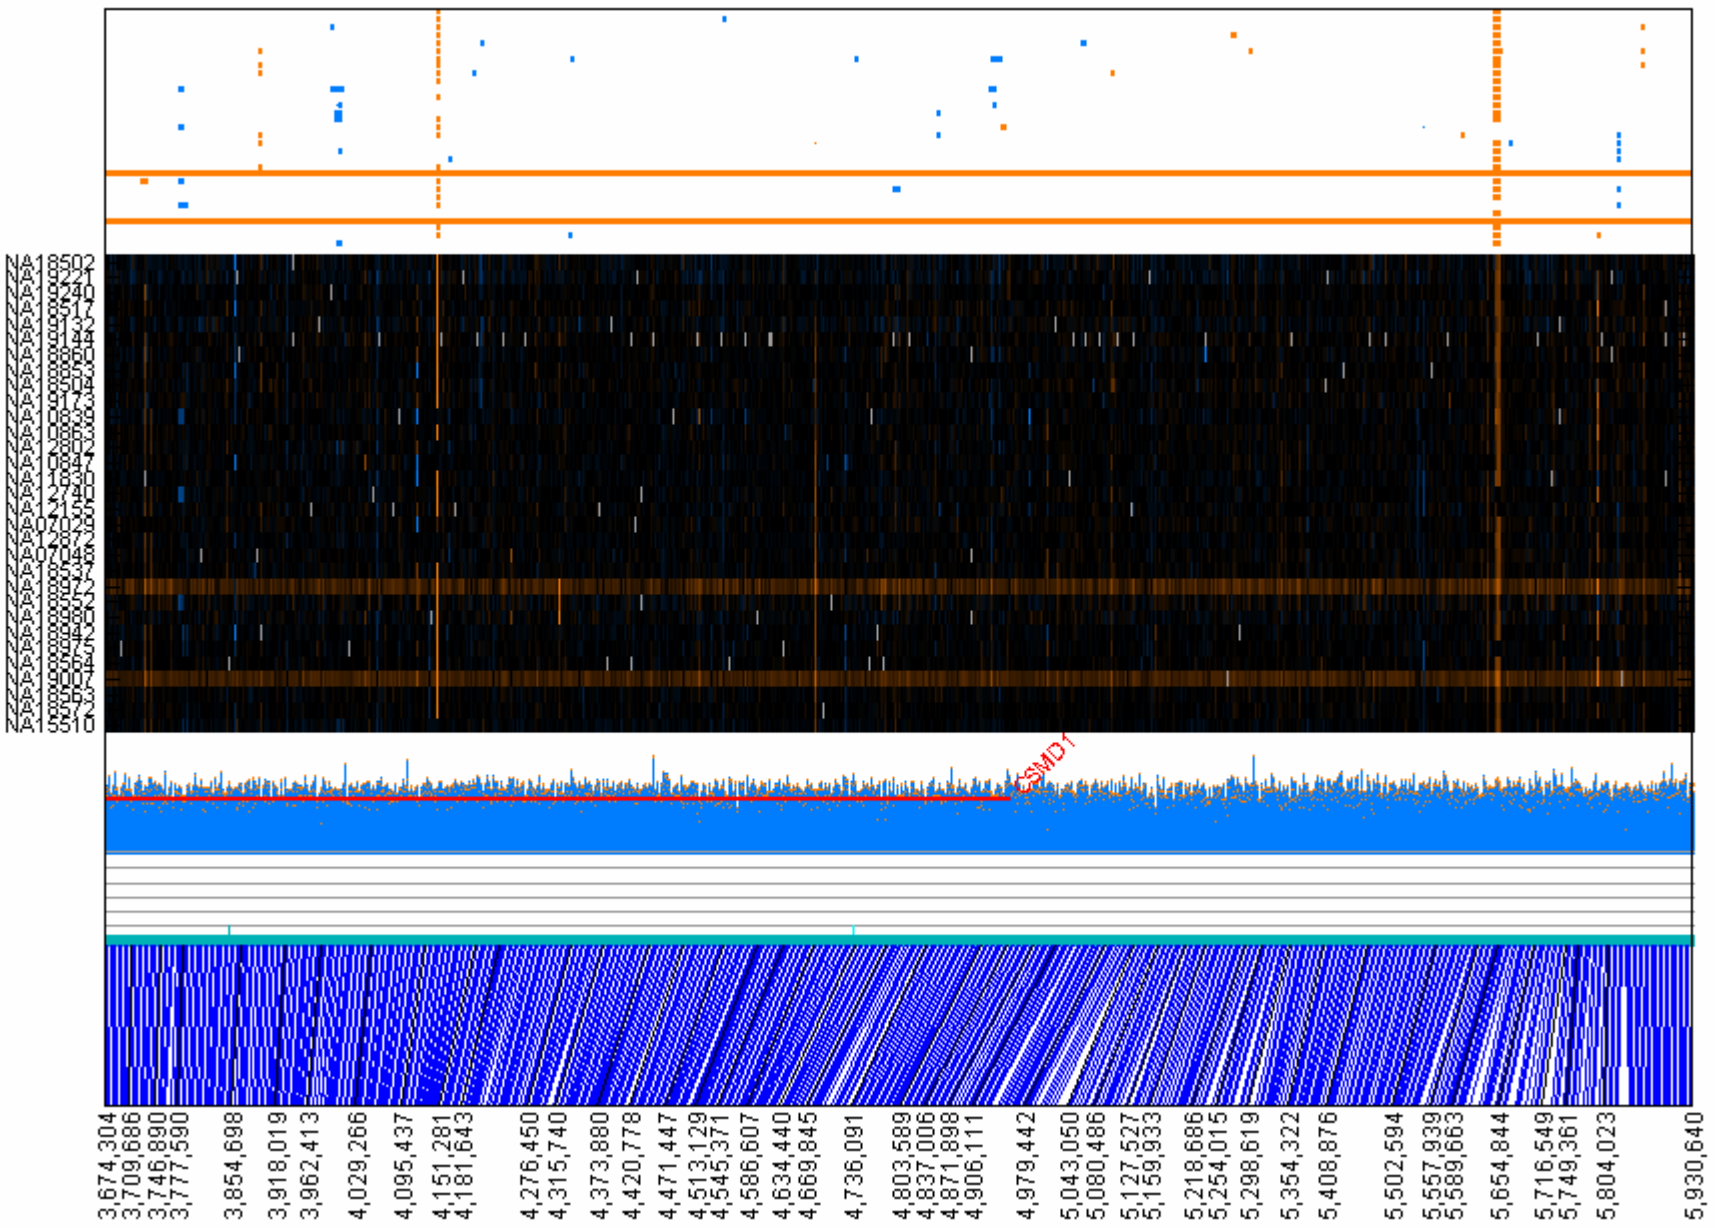

# chr8:006095436-006151950

chr8:006095436-006151950

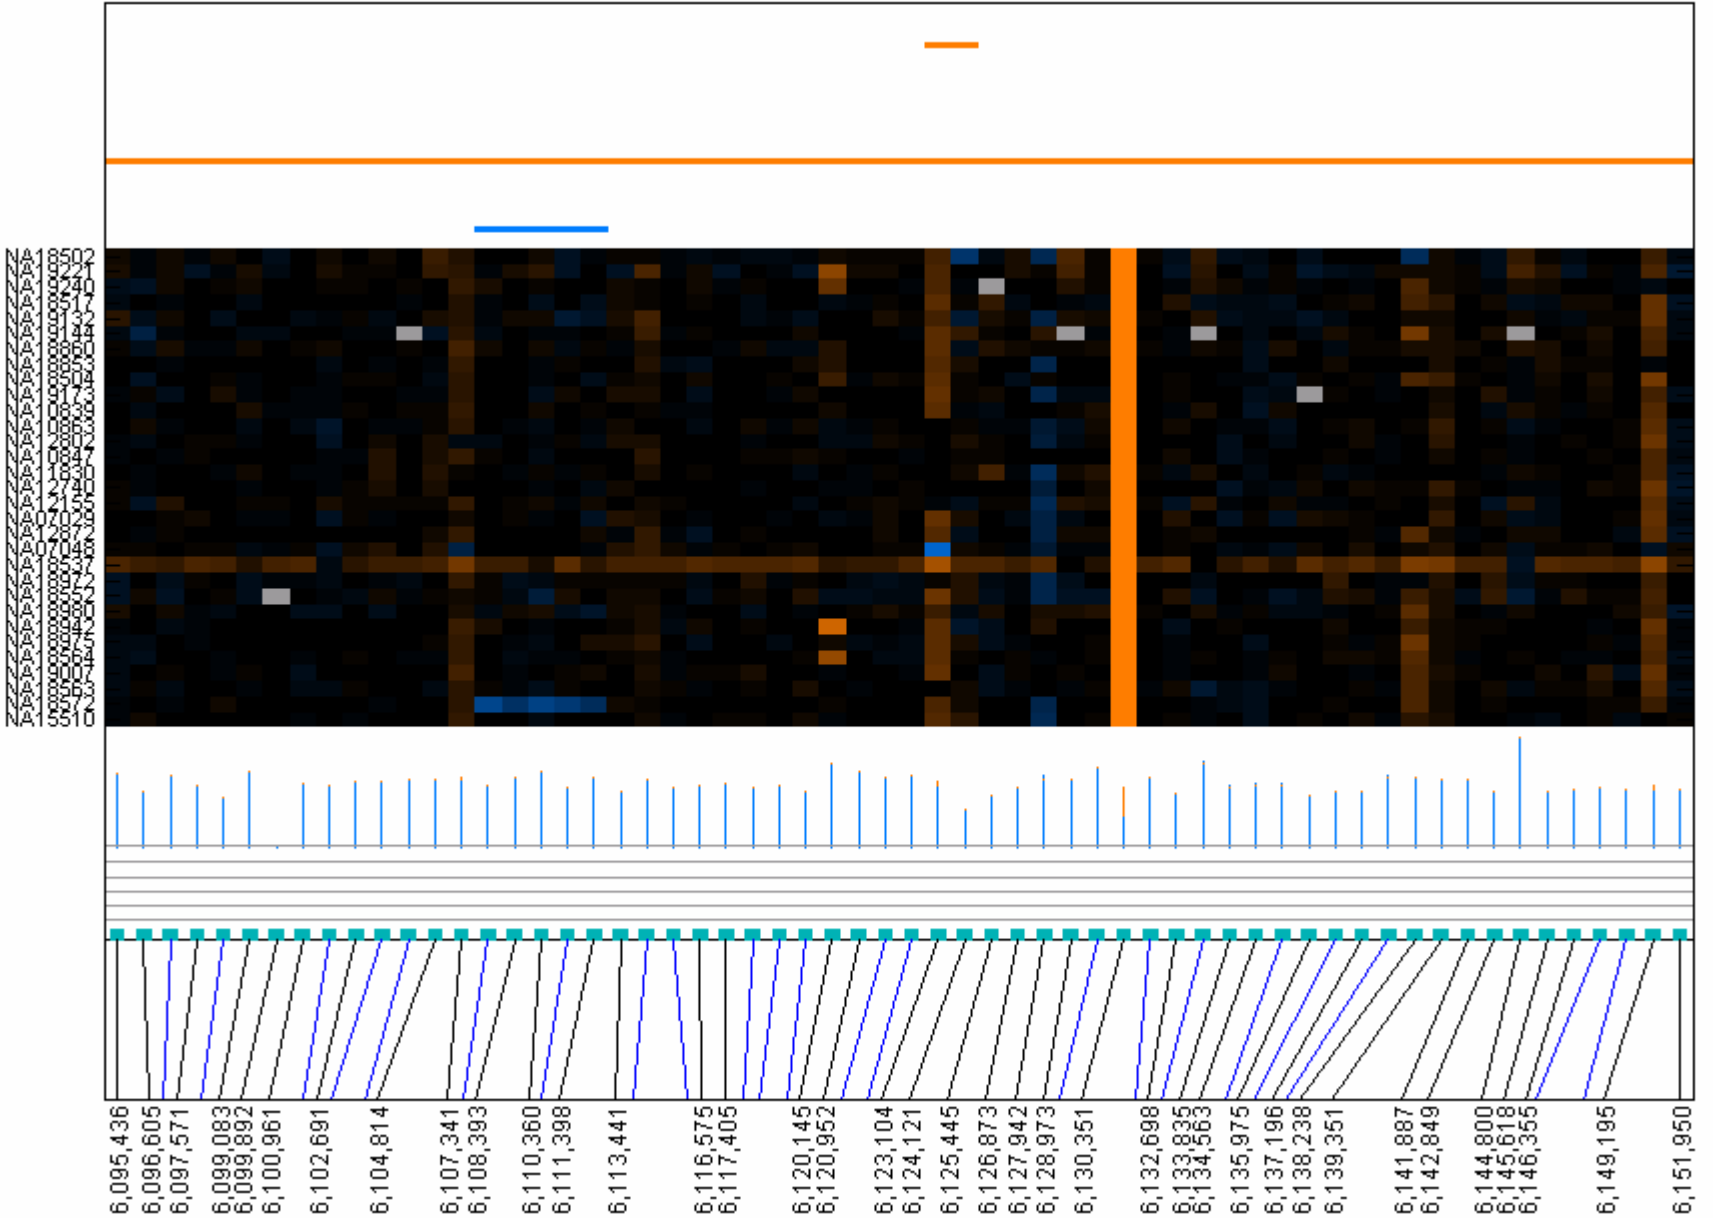

# chr8:007092202-007940538

chr8:007092202-007940538

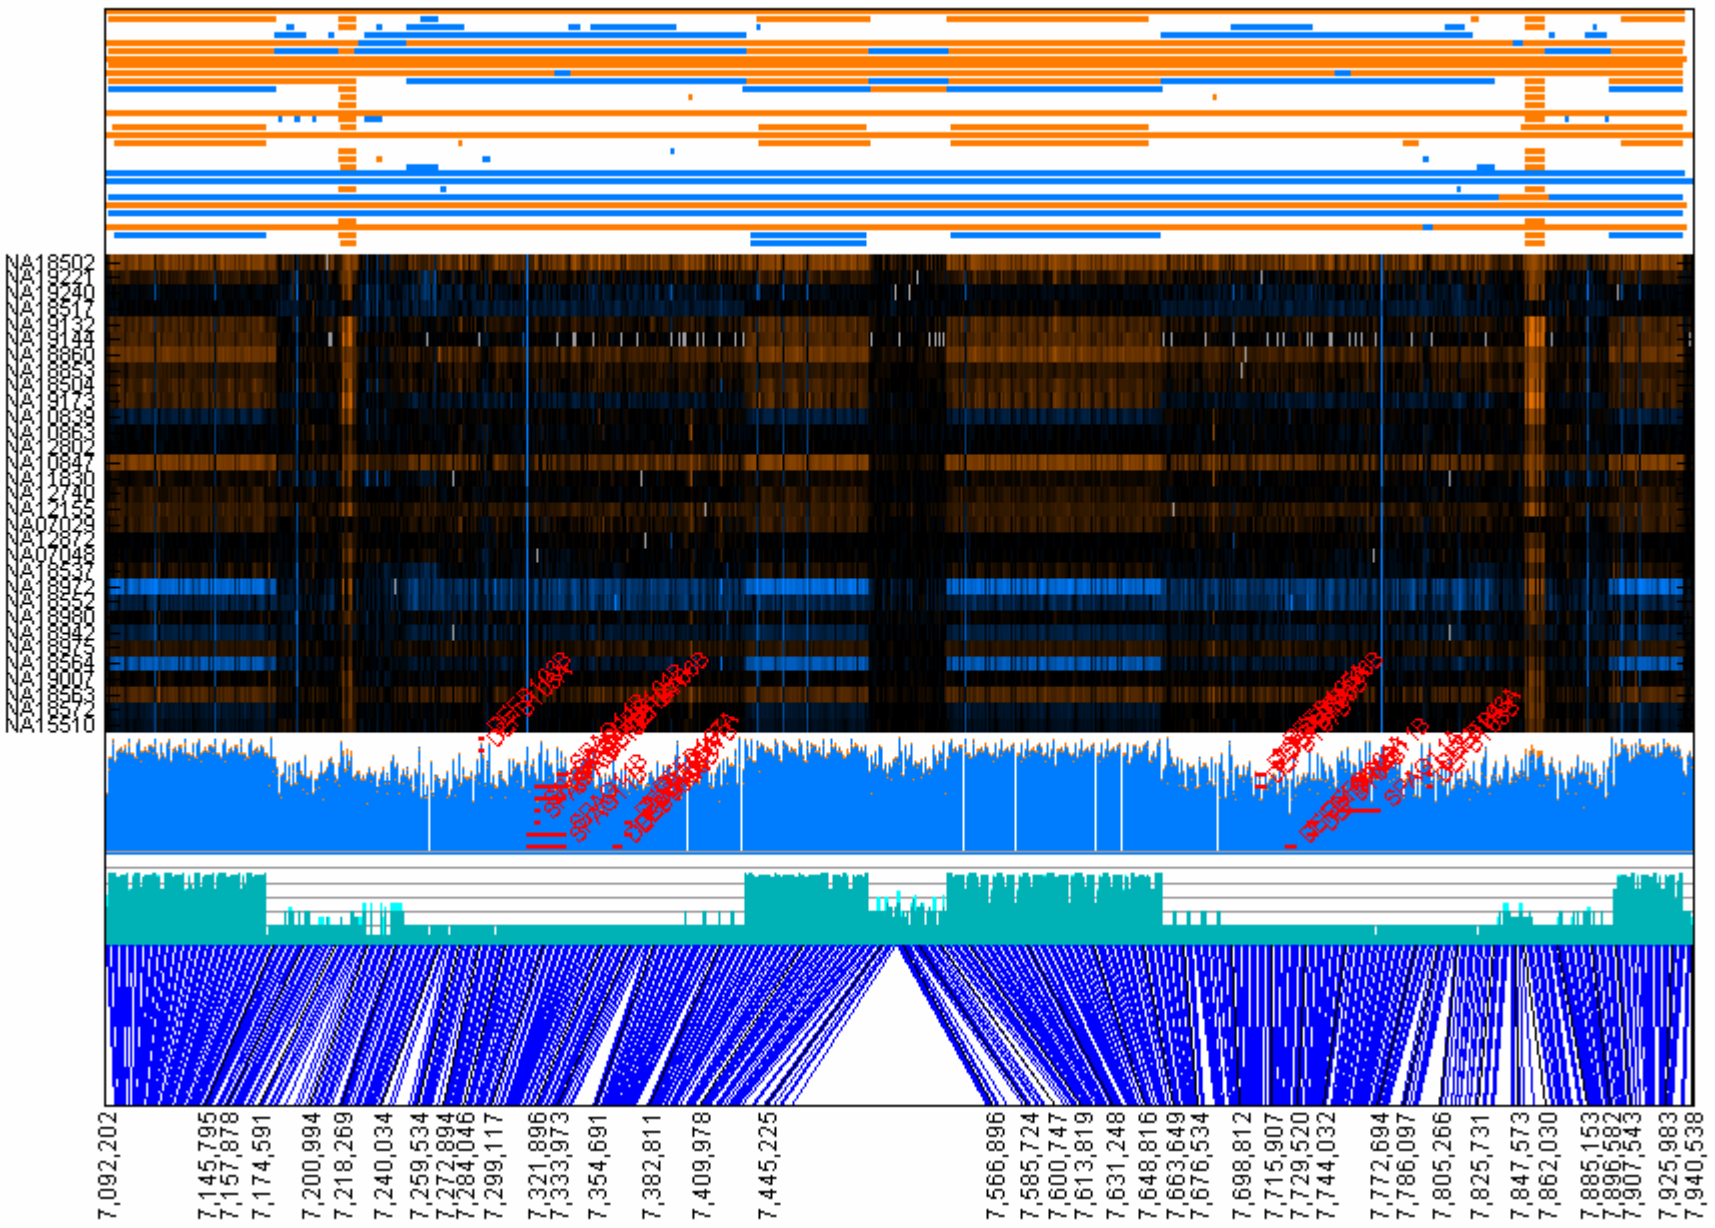



# chr8:011988287-012527189

chr8:011988287-012527189

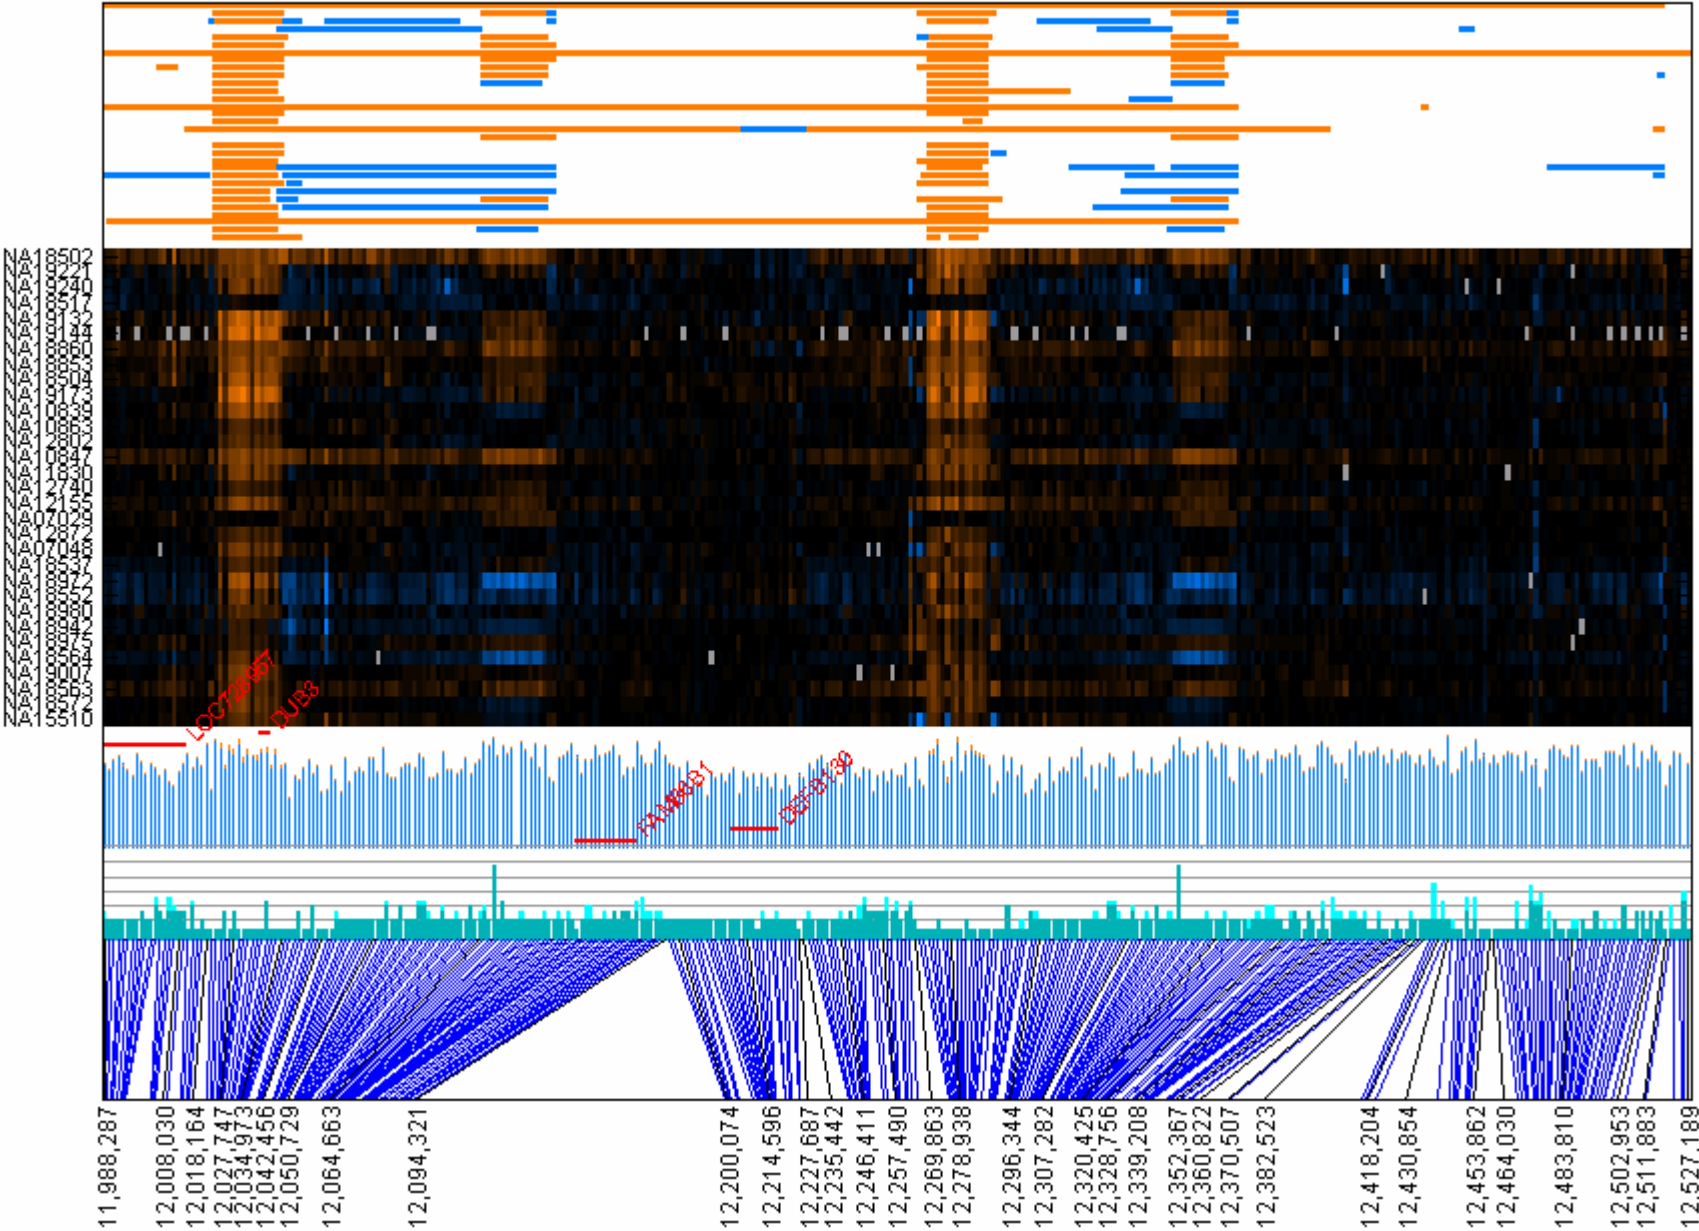



# chr8:086710271-086925310

chr8:086710271-086925310

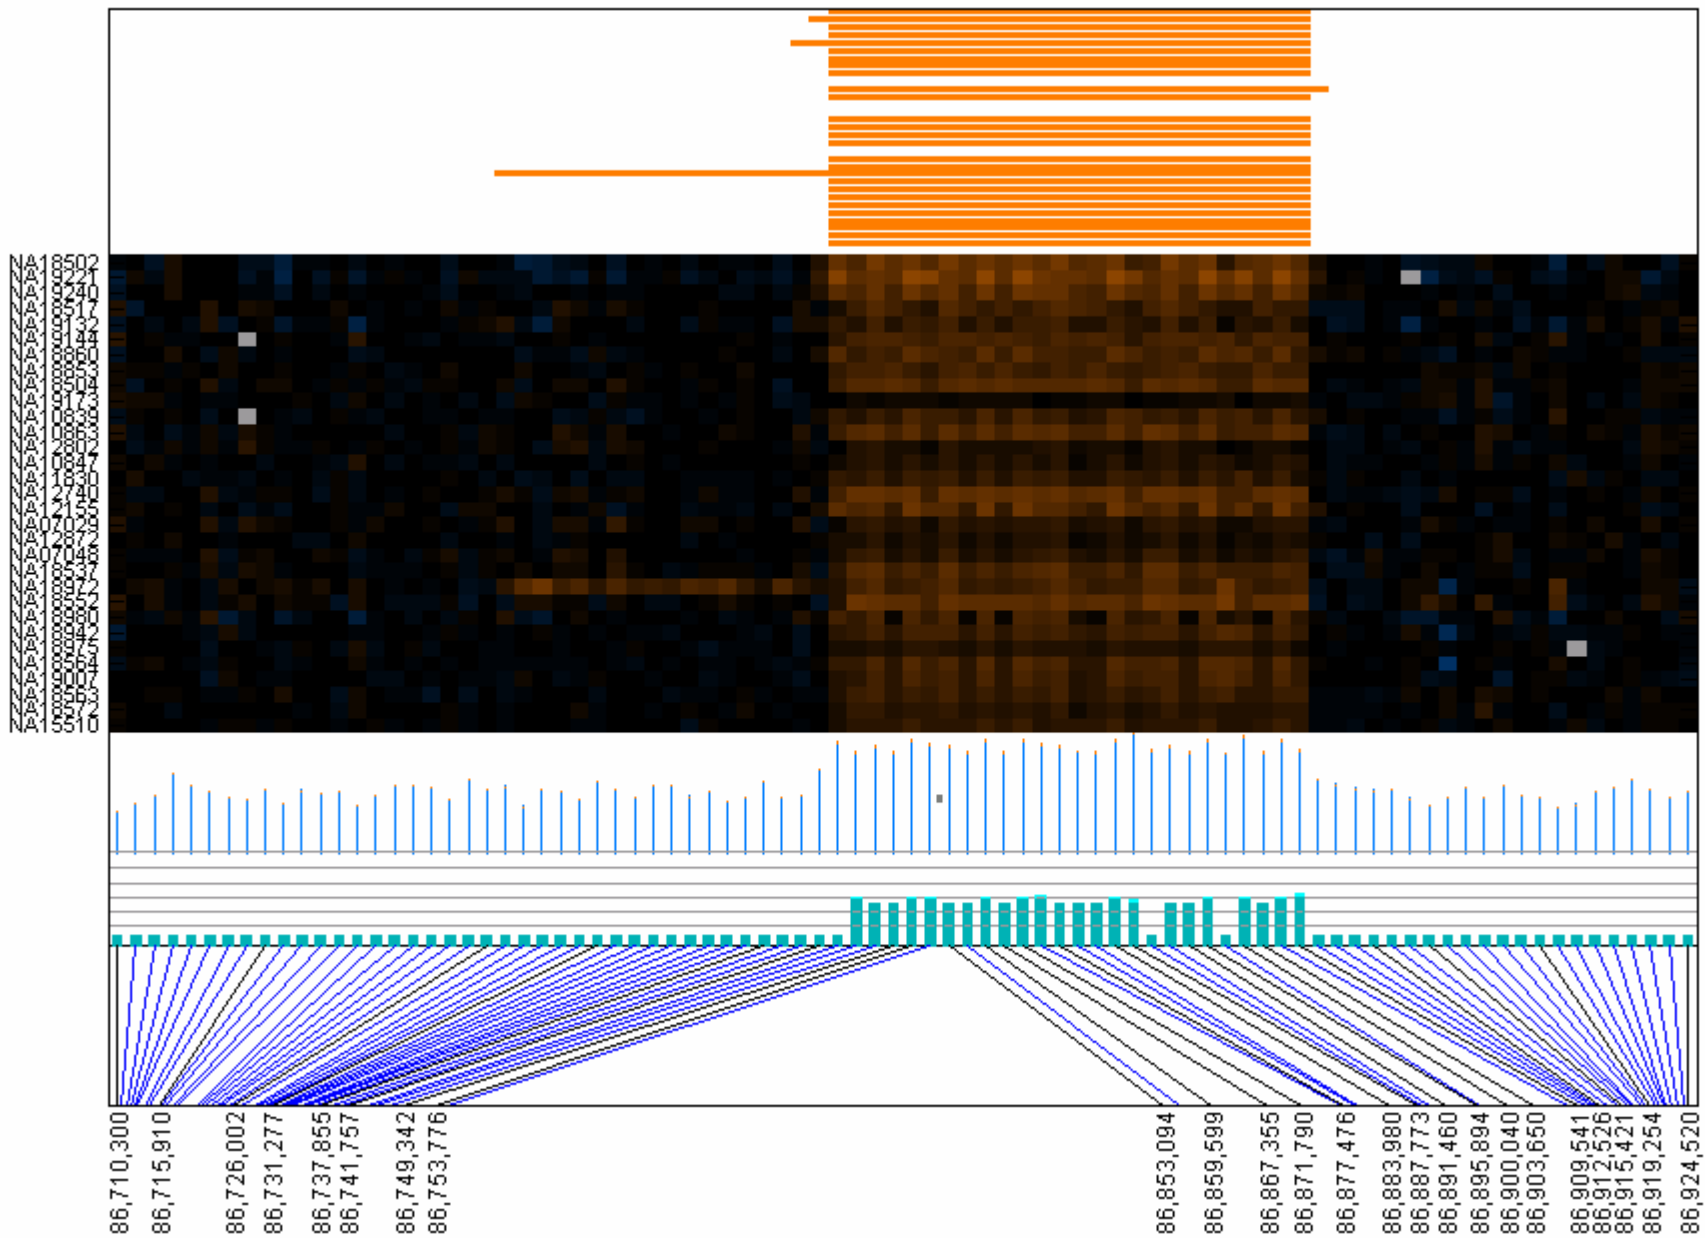

# chr9:000599968-000694515

chr9:000599968-000694515

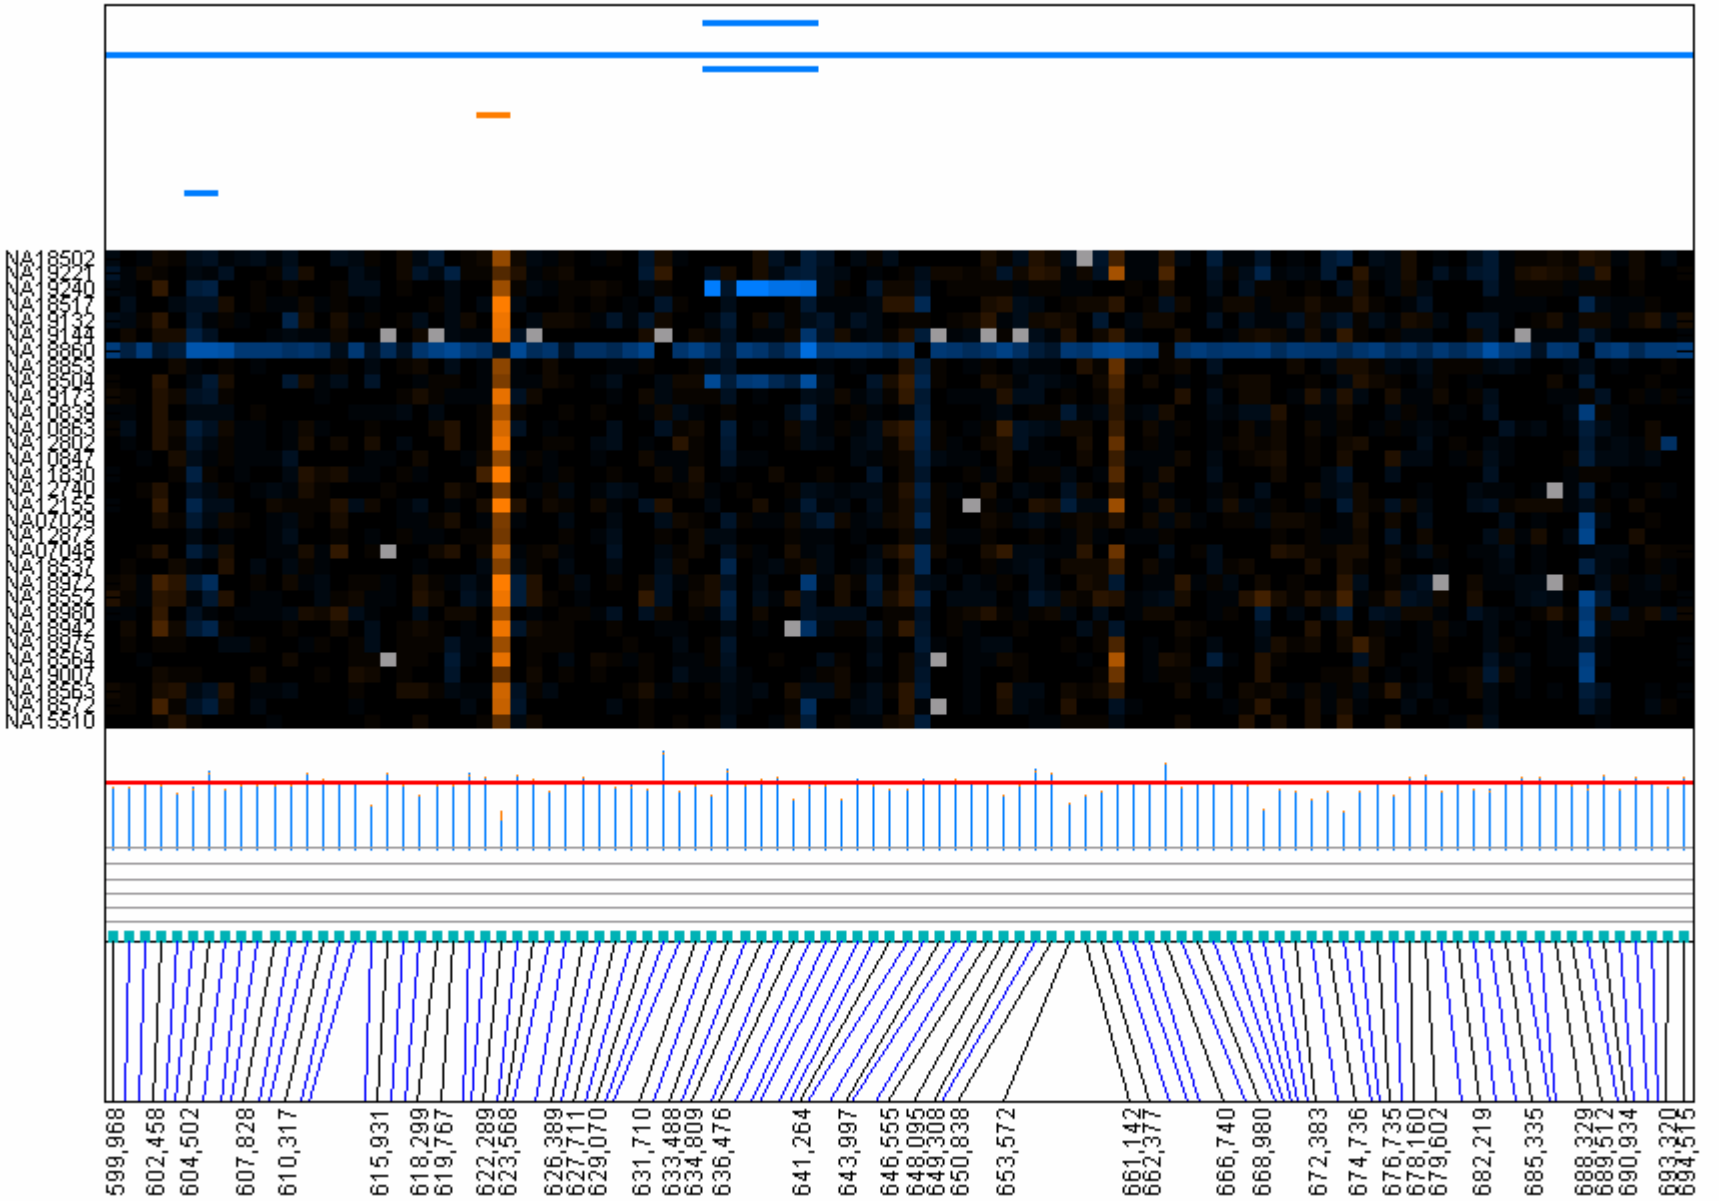

# chr9:028830605-028837661

chr9:028830605-028837661

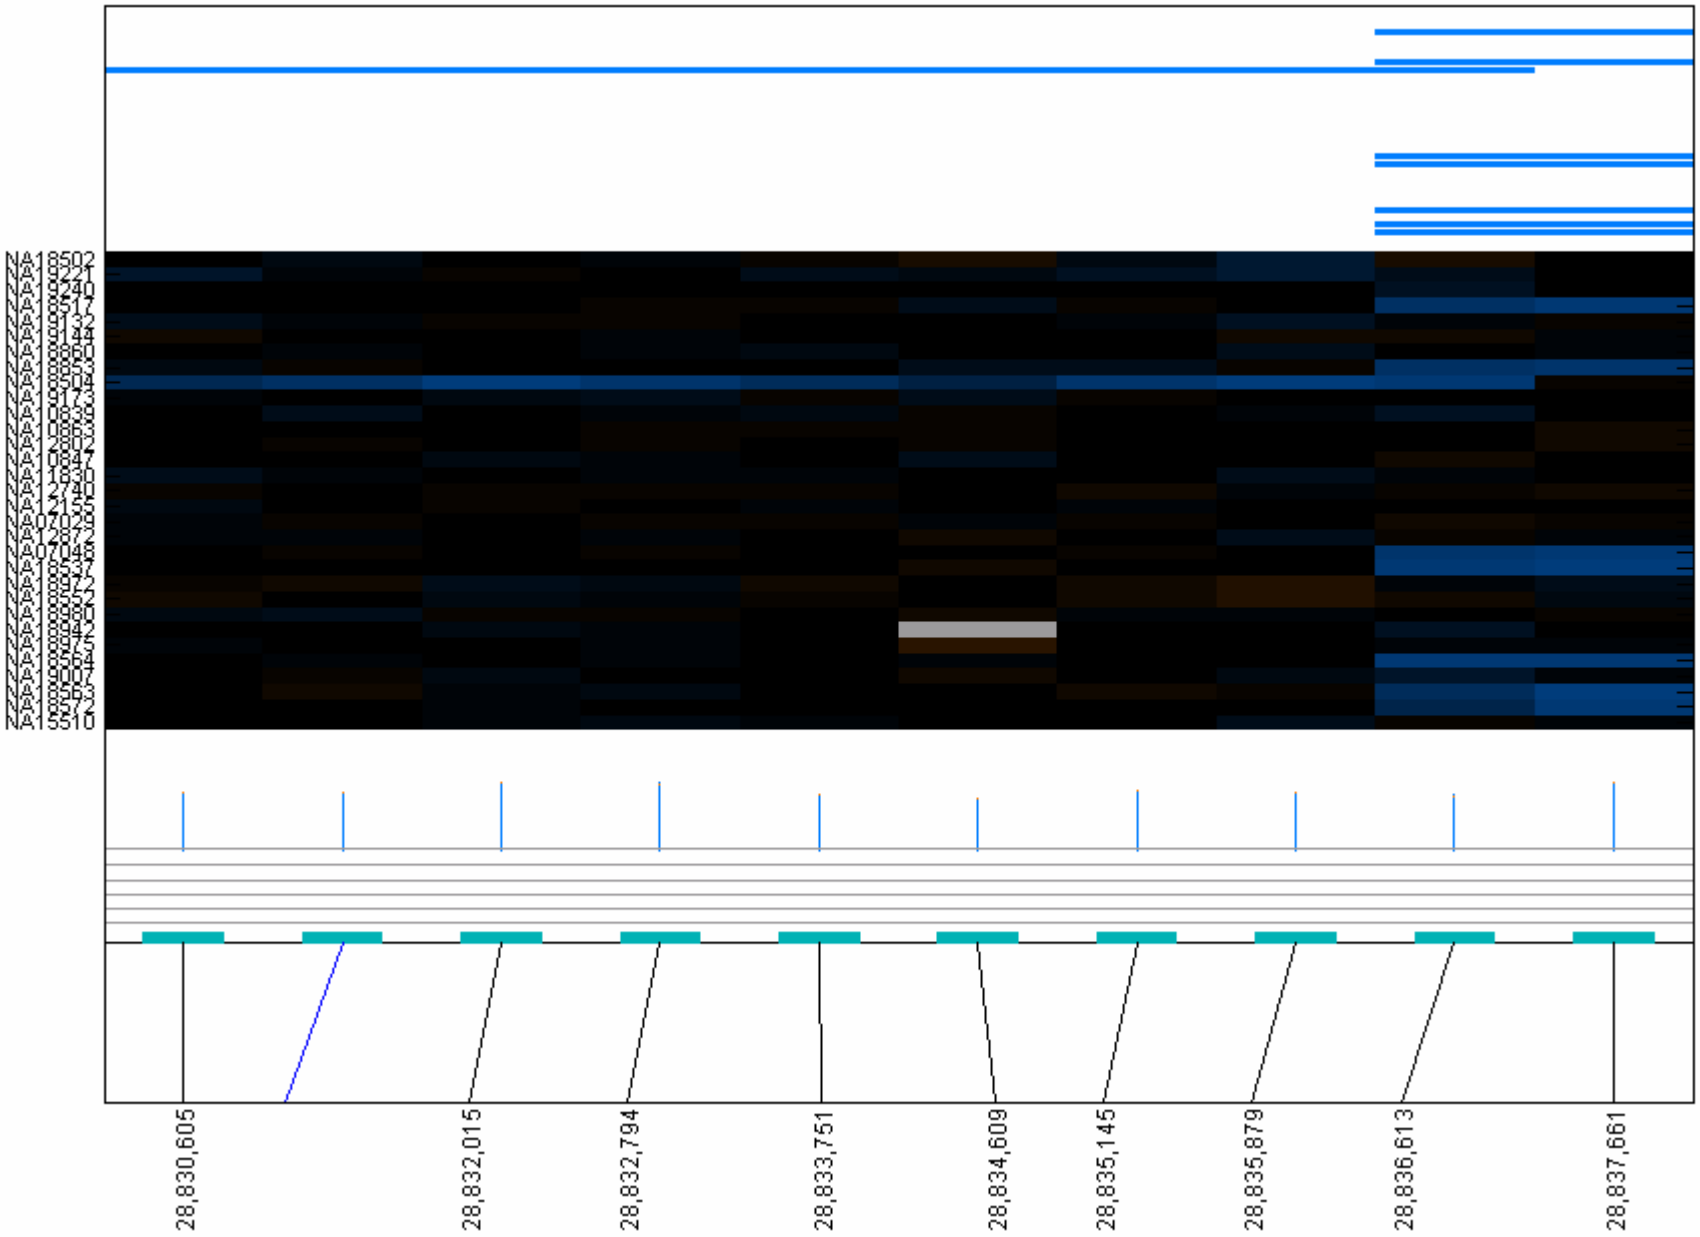

# chr9:039053784-041480923

chr9:039053784-041480923

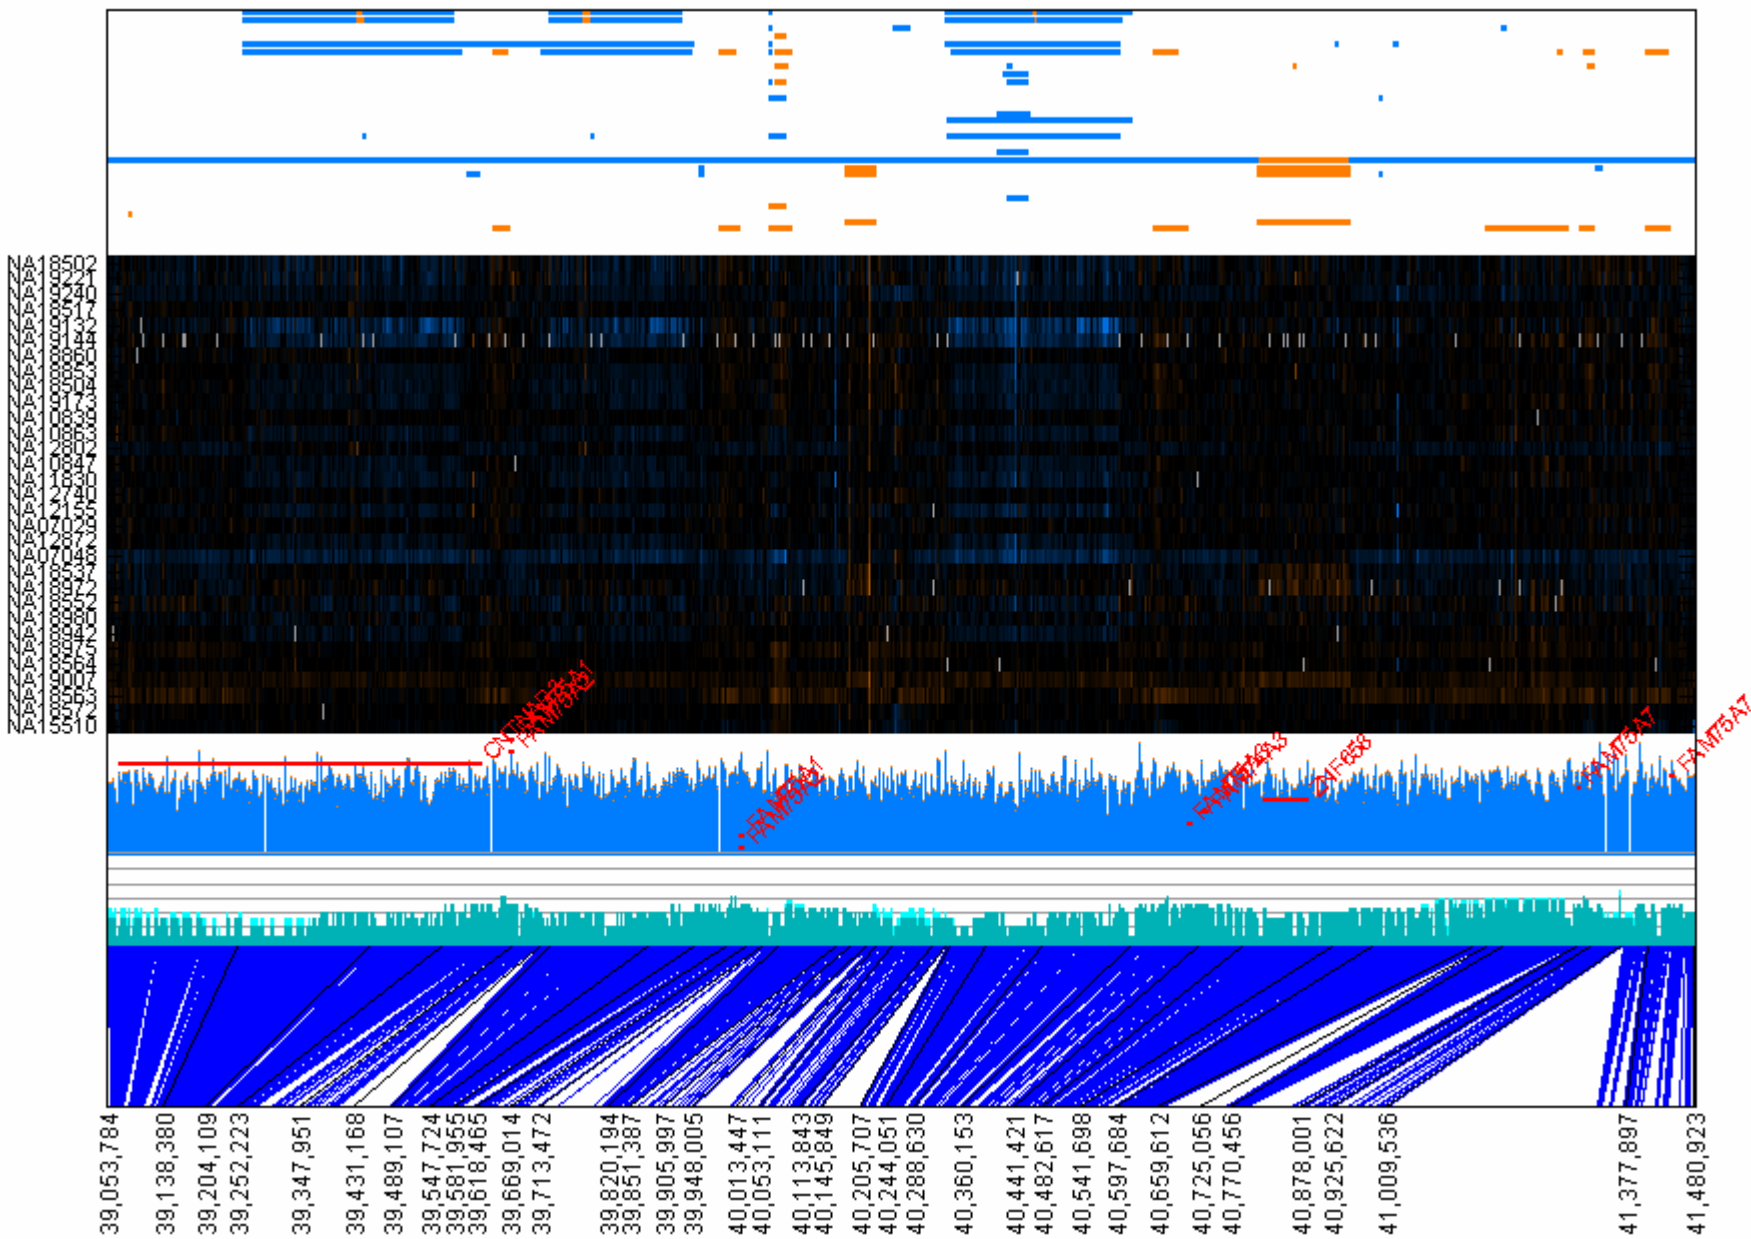

# chr9:042213813-043809175

chr9:042213813-043809175

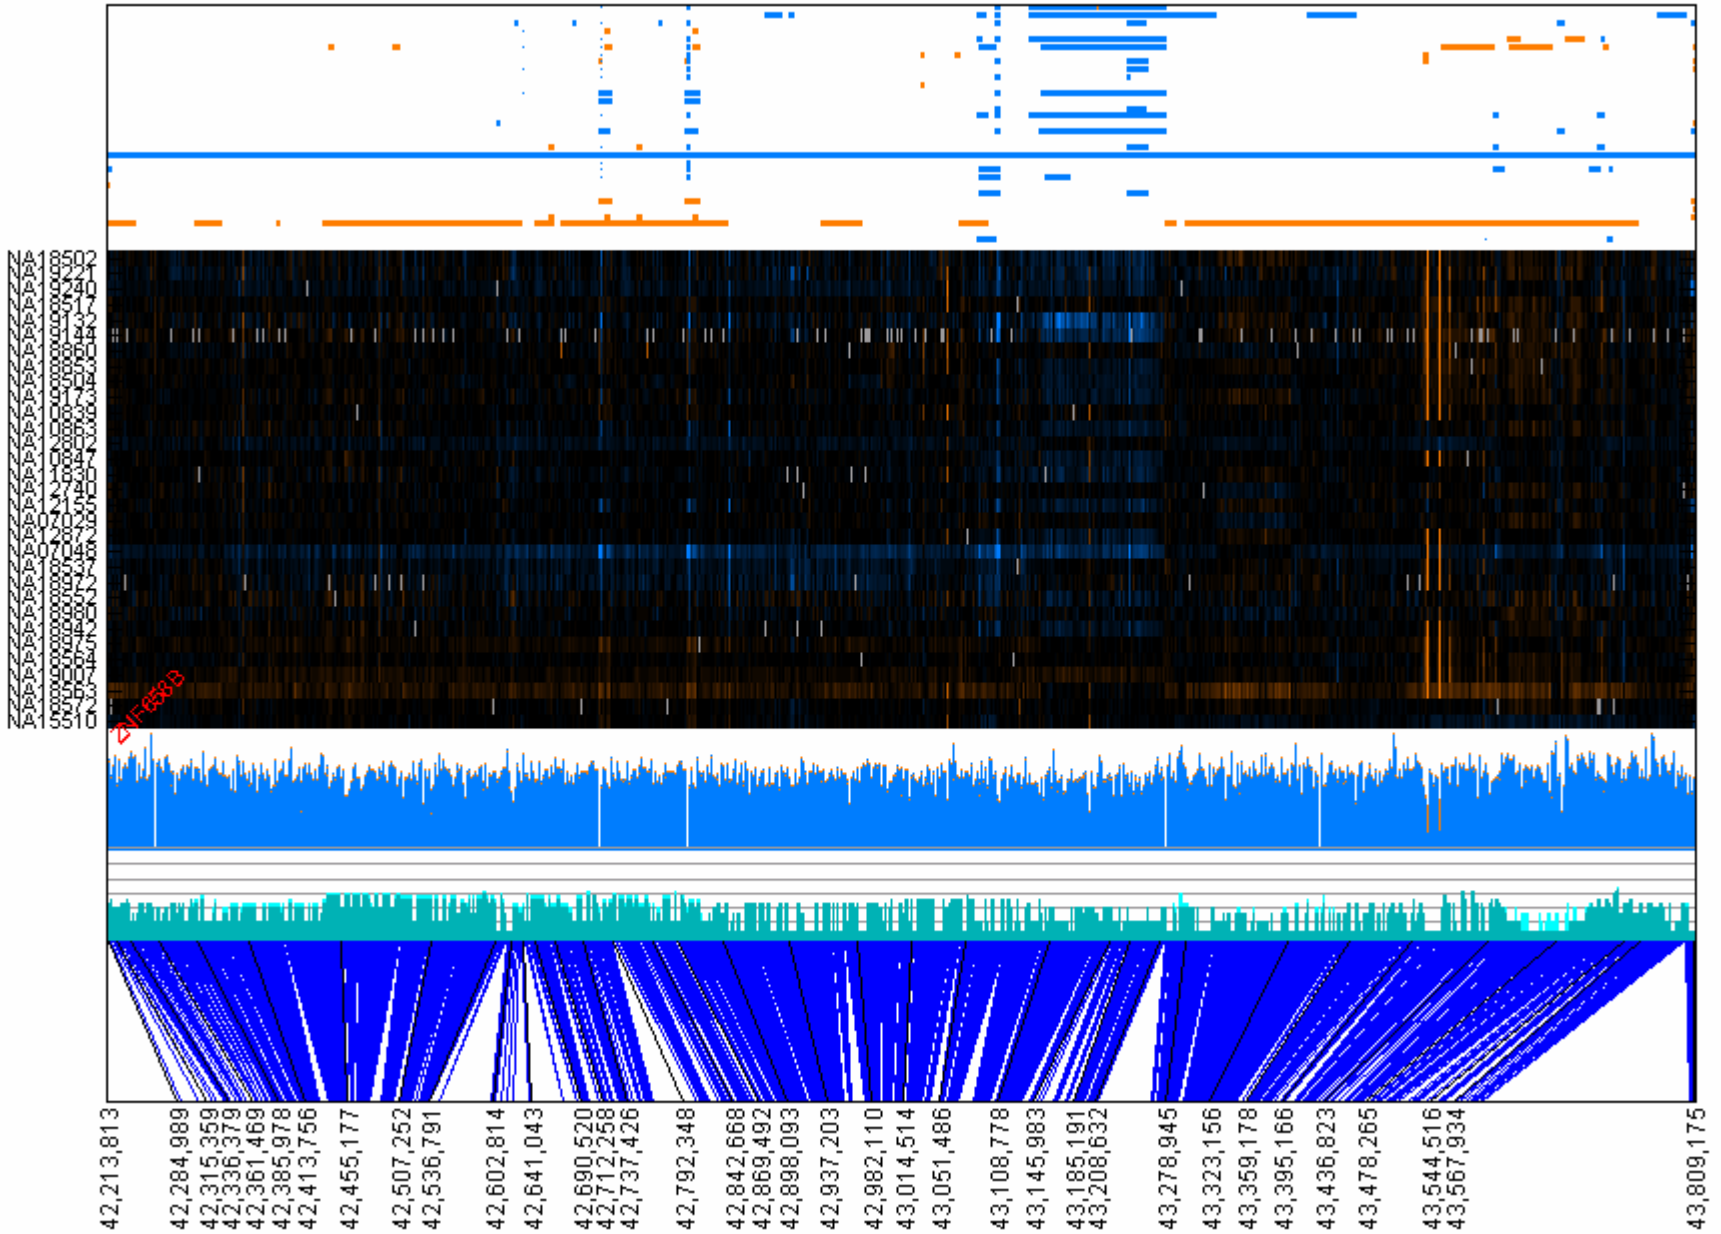

# chr9:044926583-045415849

chr9:044926583-045415849

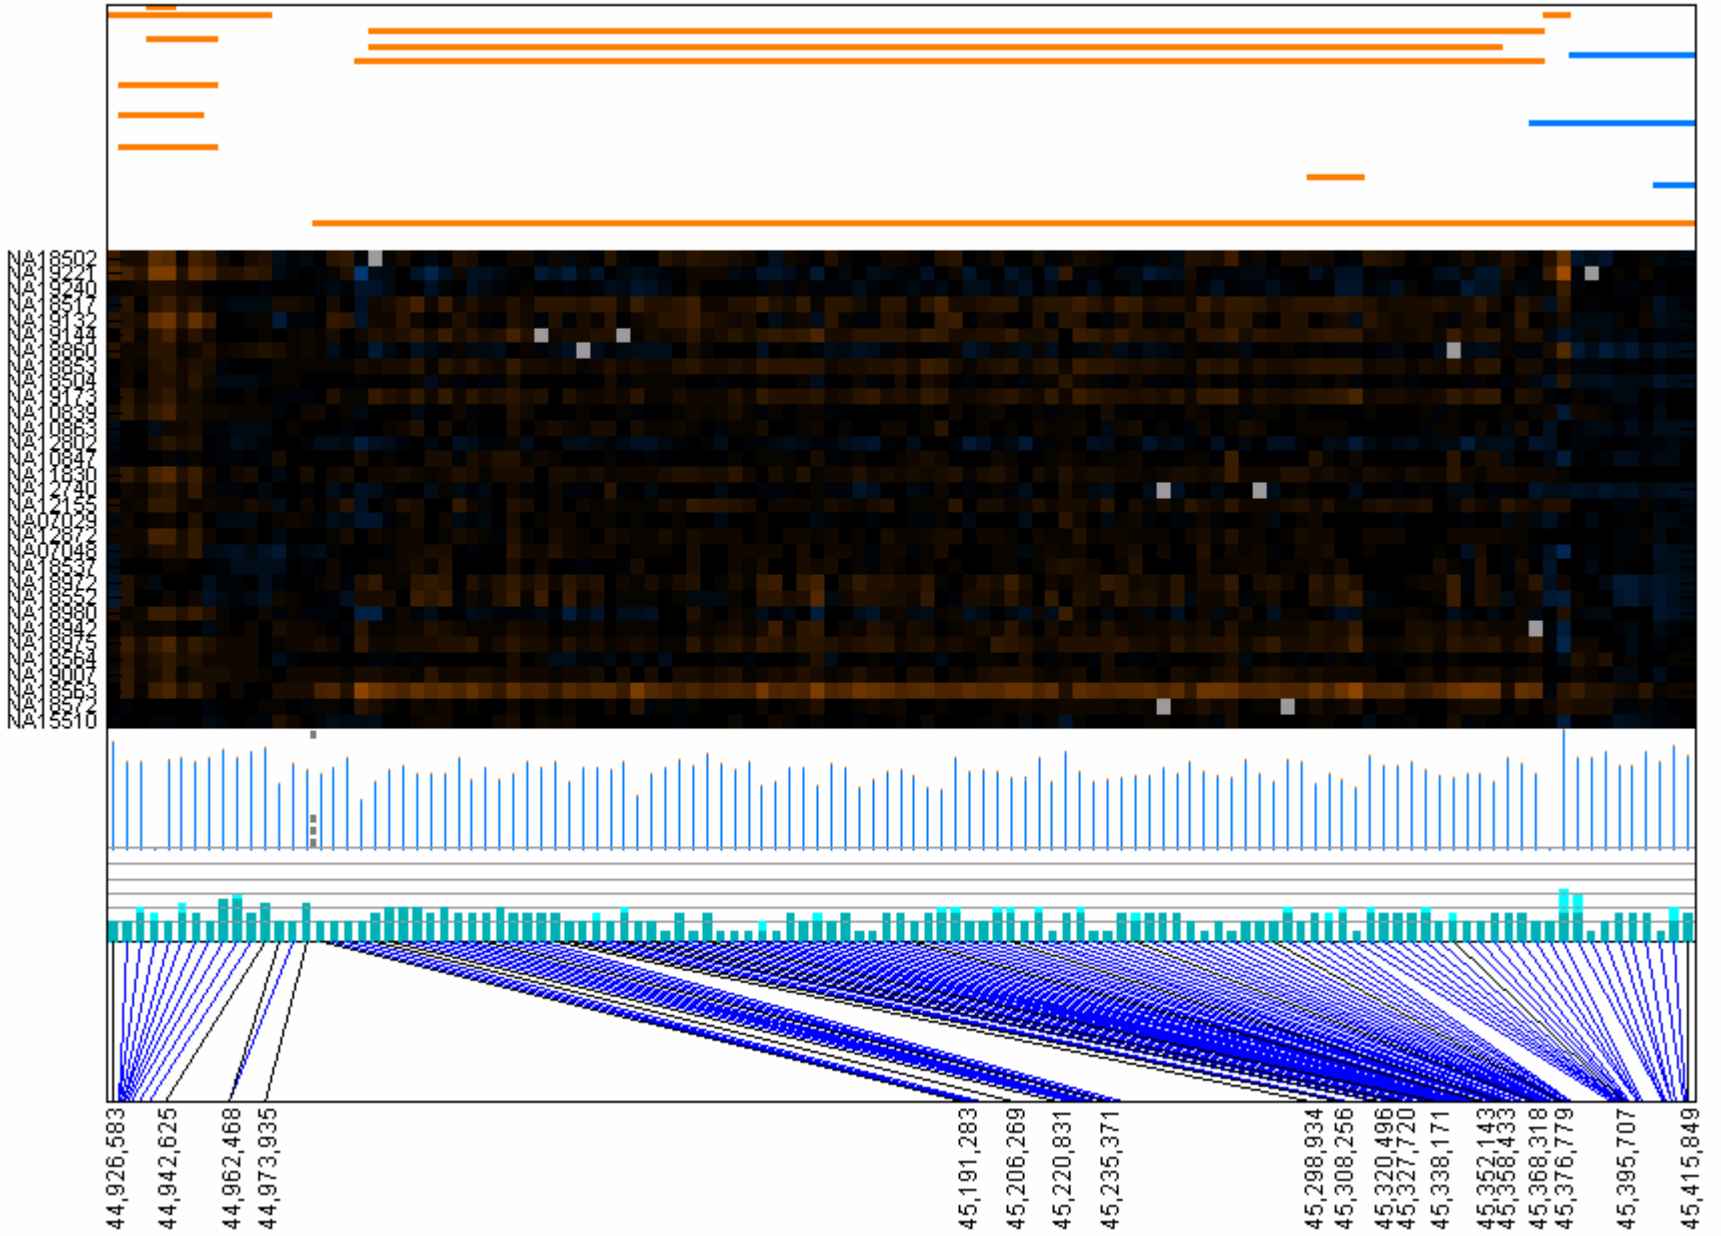



# chr9:066301856-068261331

chr9:066301856-068261331

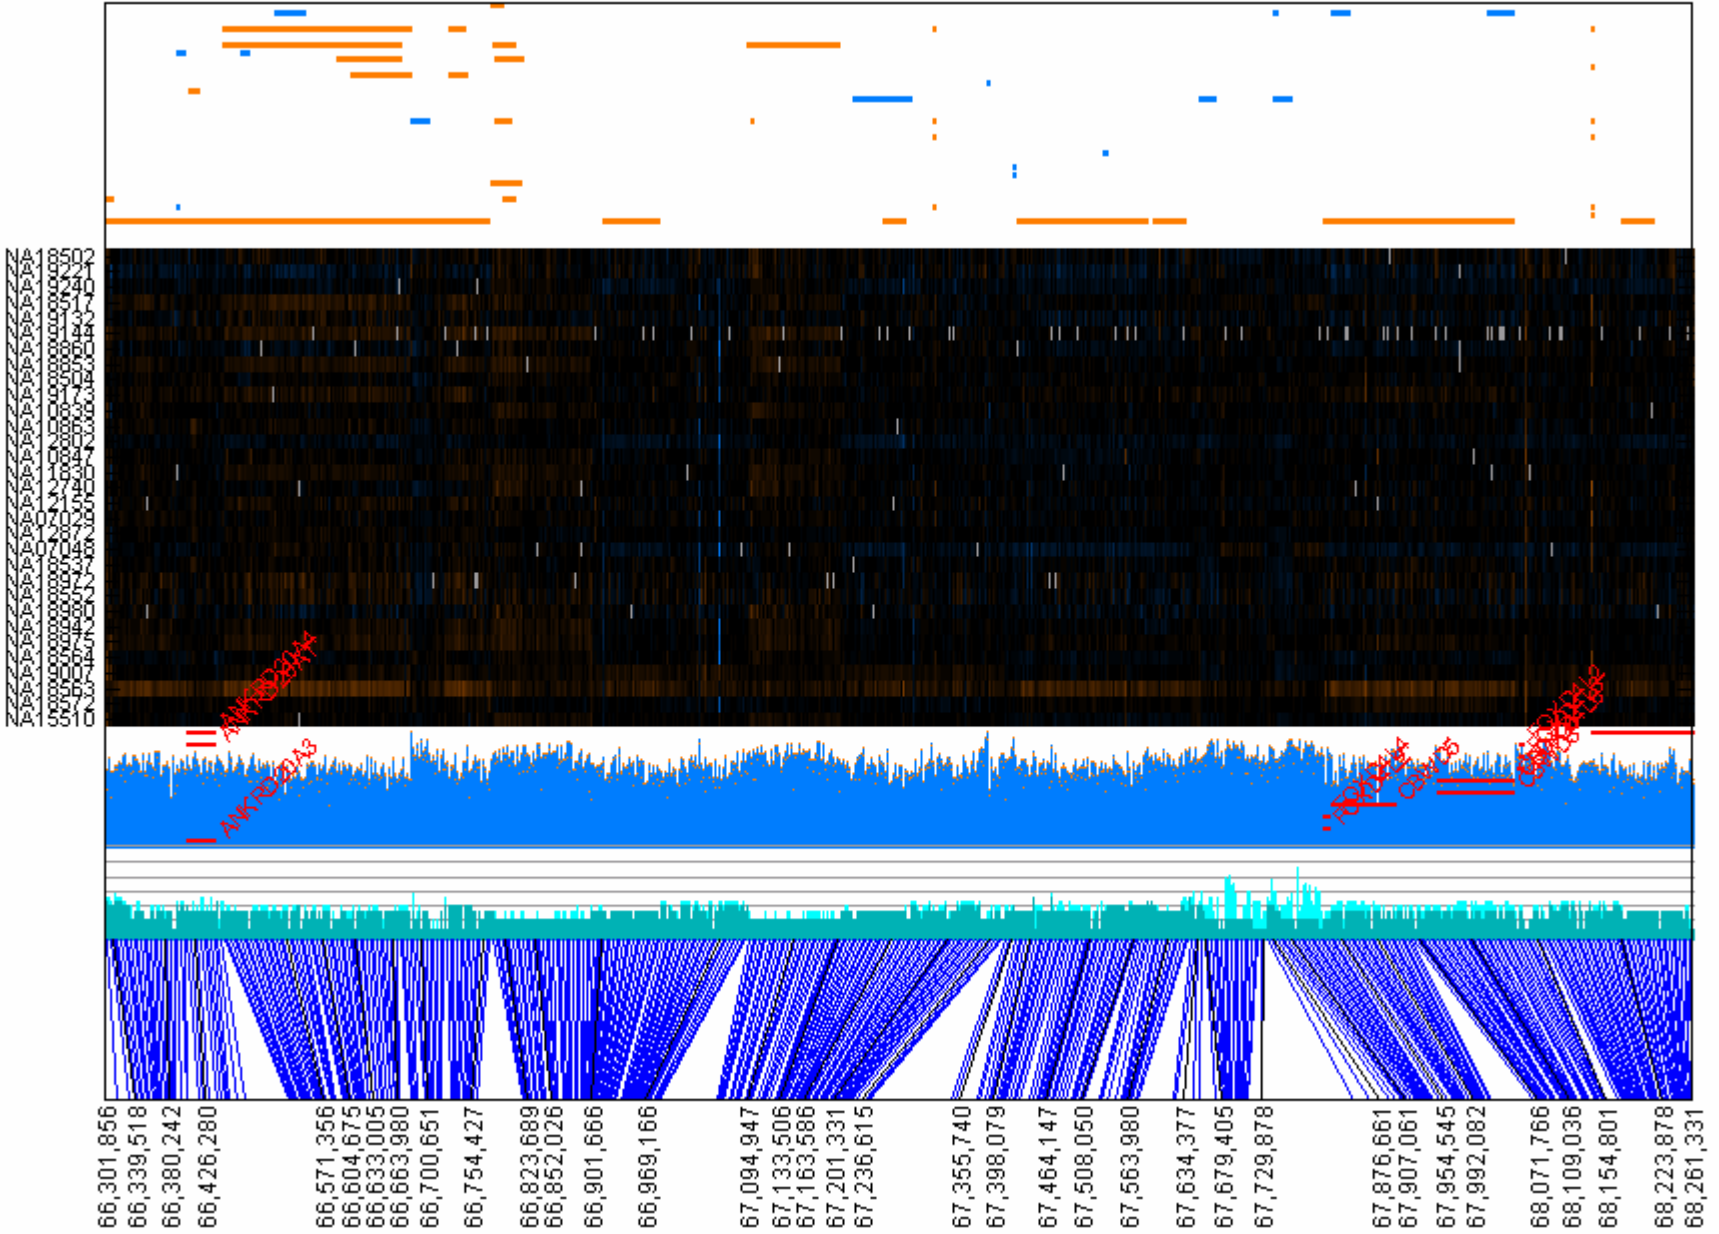

# chr10:088859433-089103532

chr10:088859433-089103532

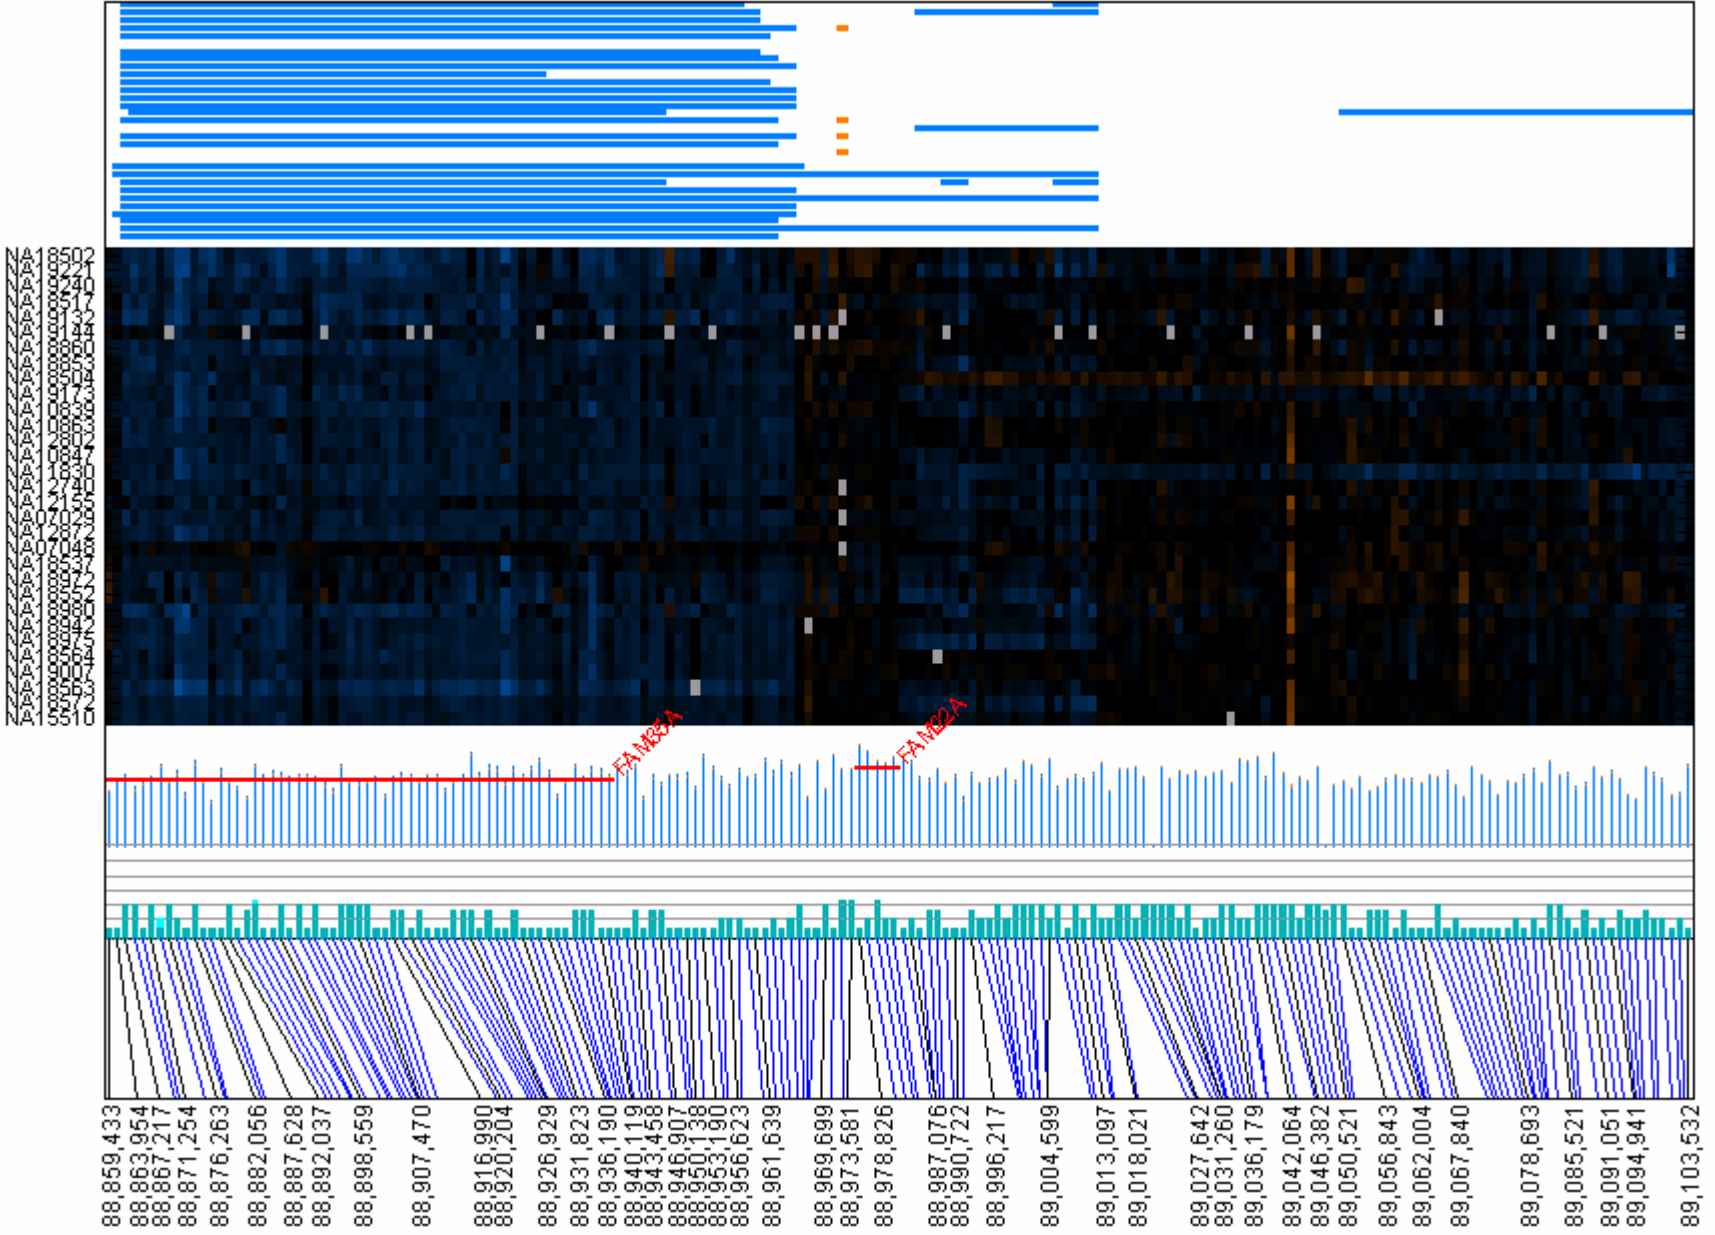

# chr10:089140512-089249436

chr10:089140512-089249436

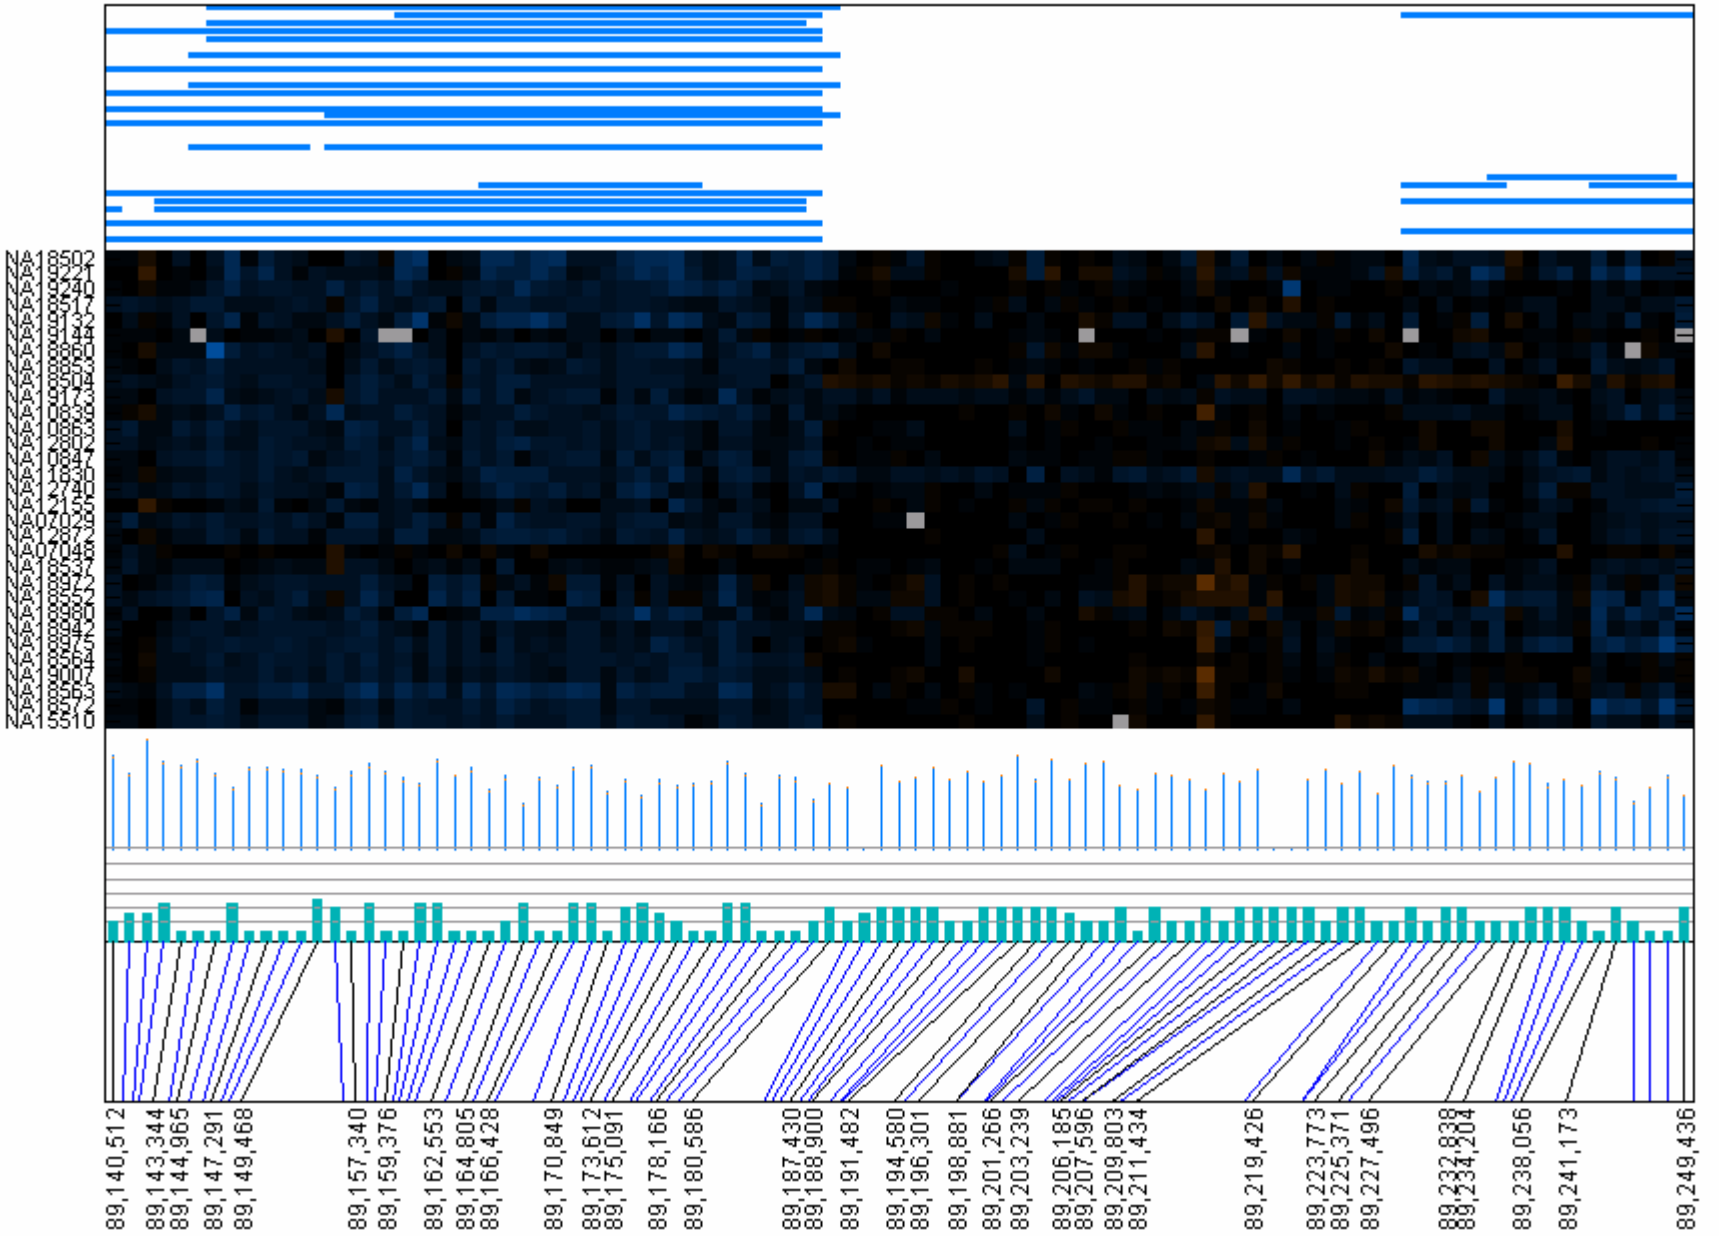

# chr10:124329099-124370524

chr10:124329099-124370524

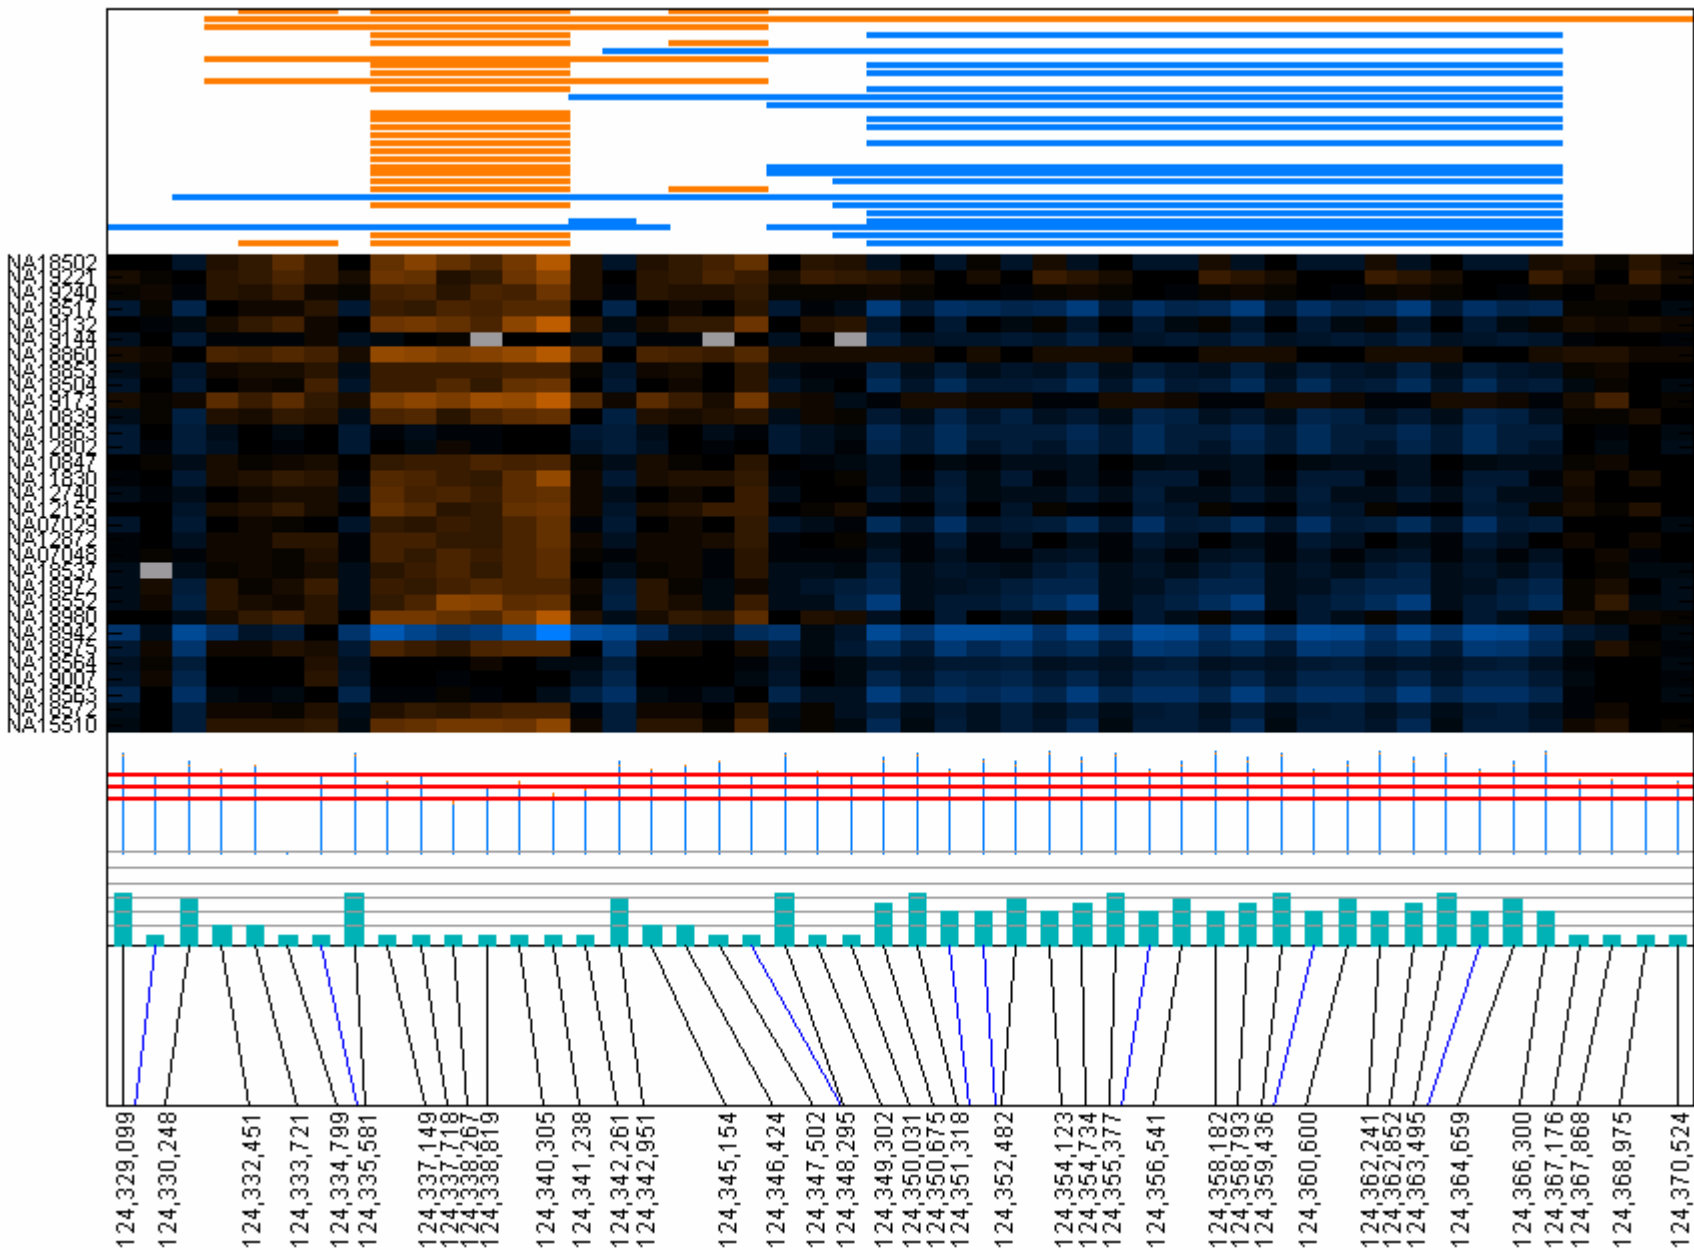

# chr10:135141231-135394862

chr10:135141231-135394862

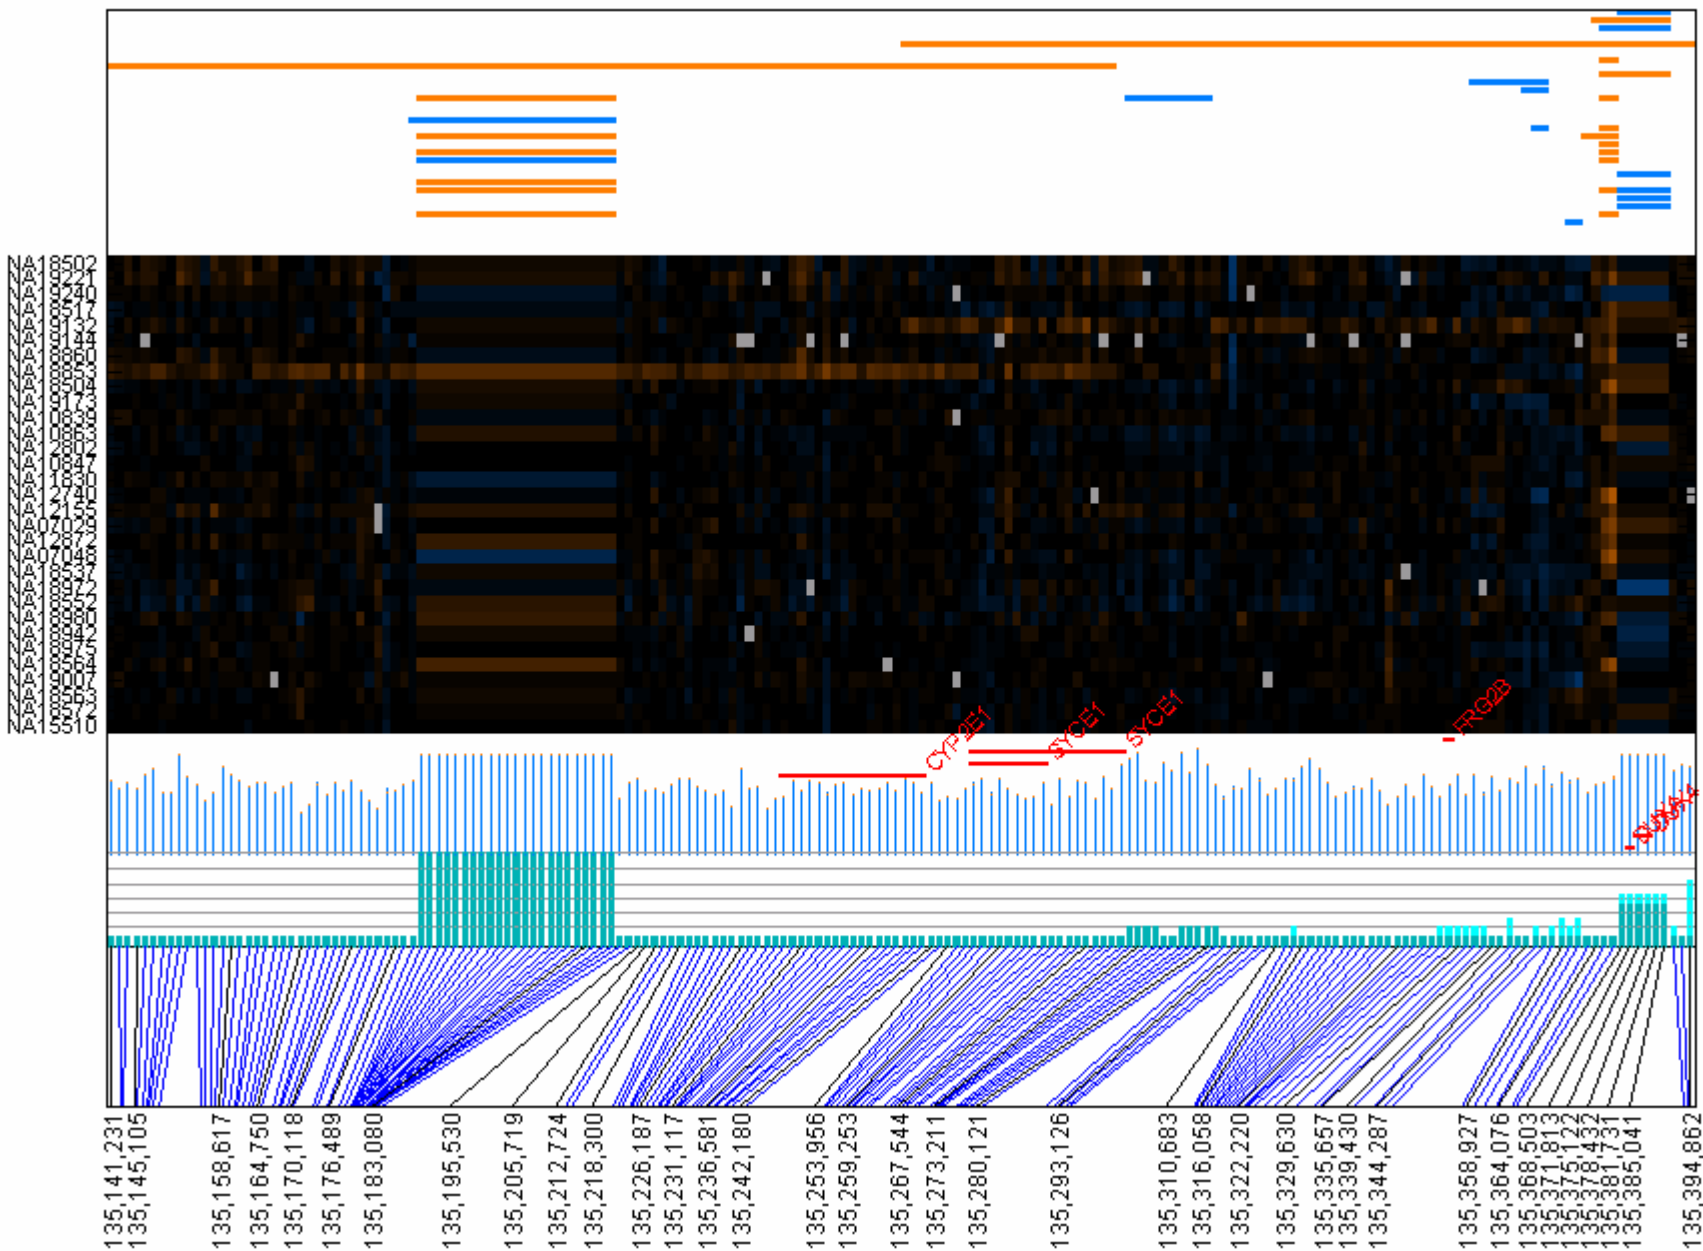

# chr11:003225514-003315778

chr11:003225514-003315778

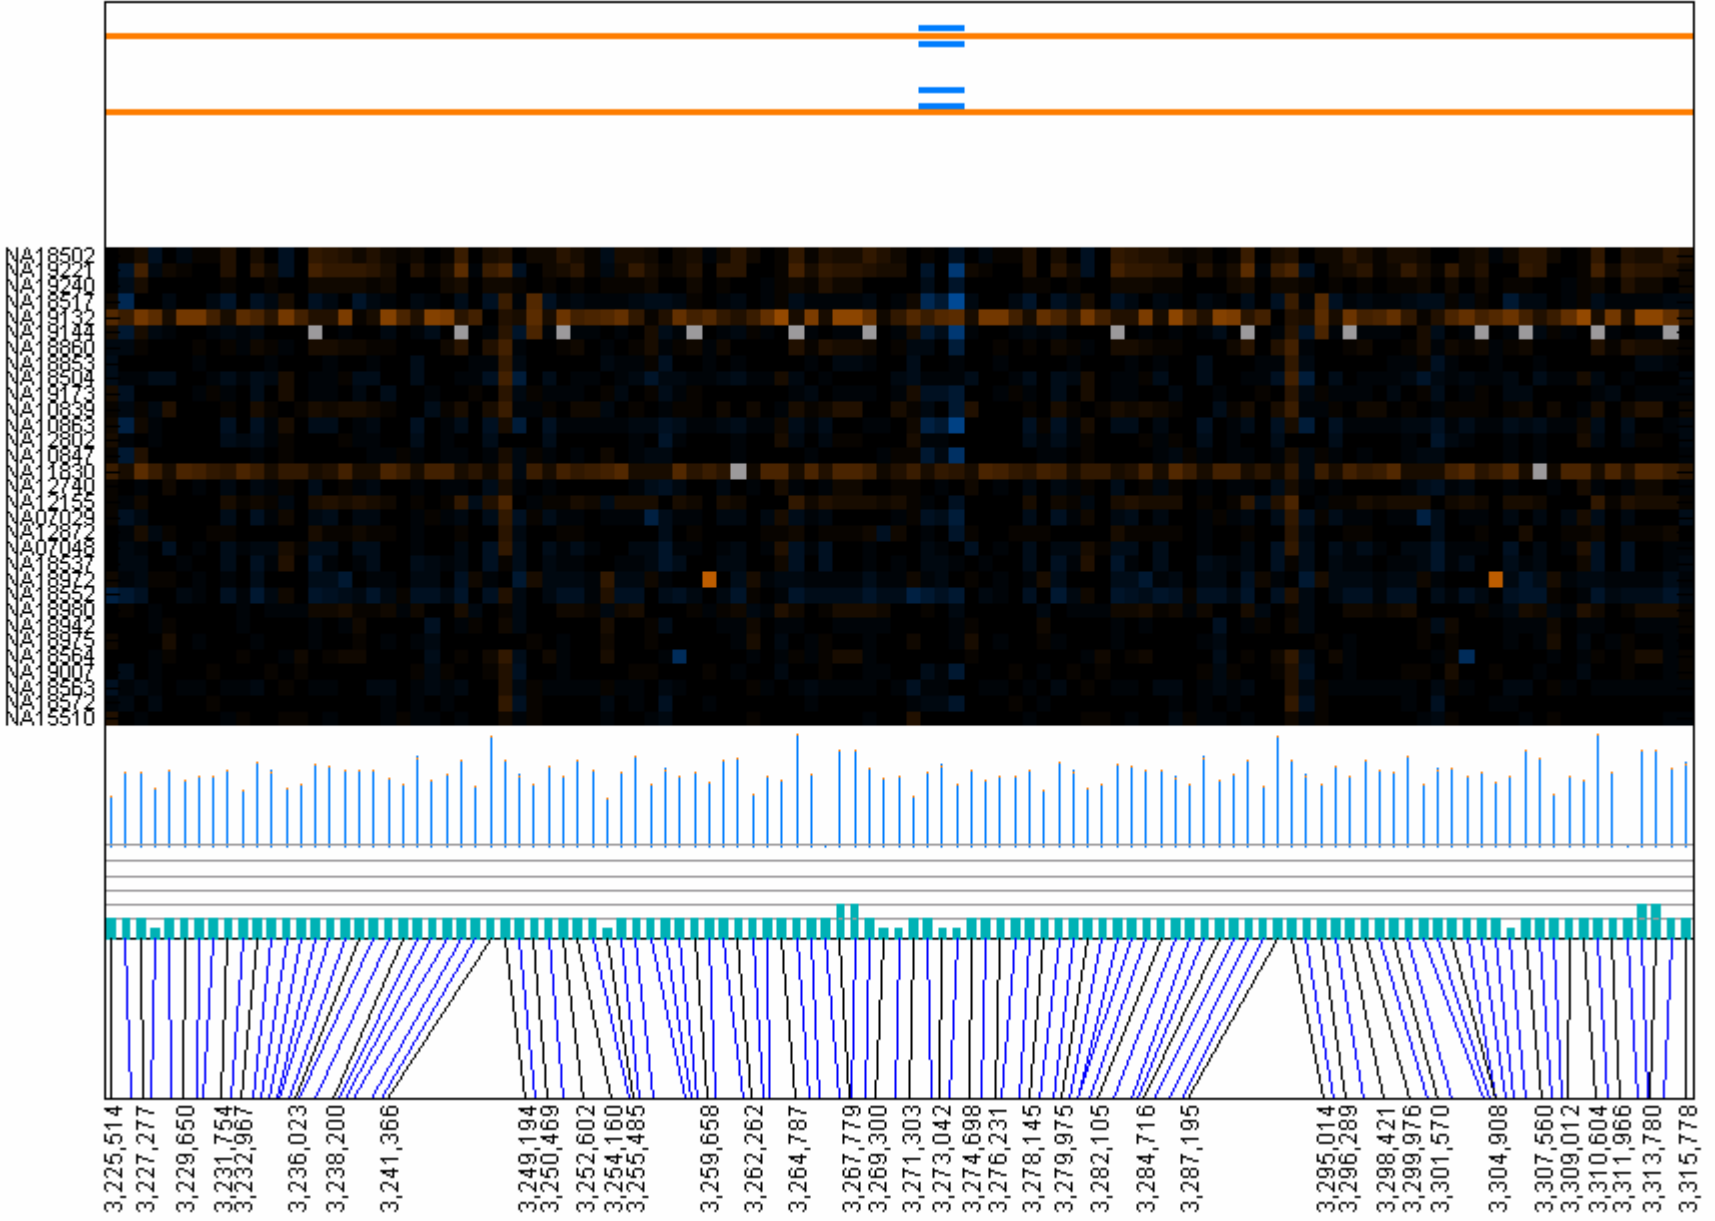

# chr11:004123217-004334702

chr11:004123217-004334702

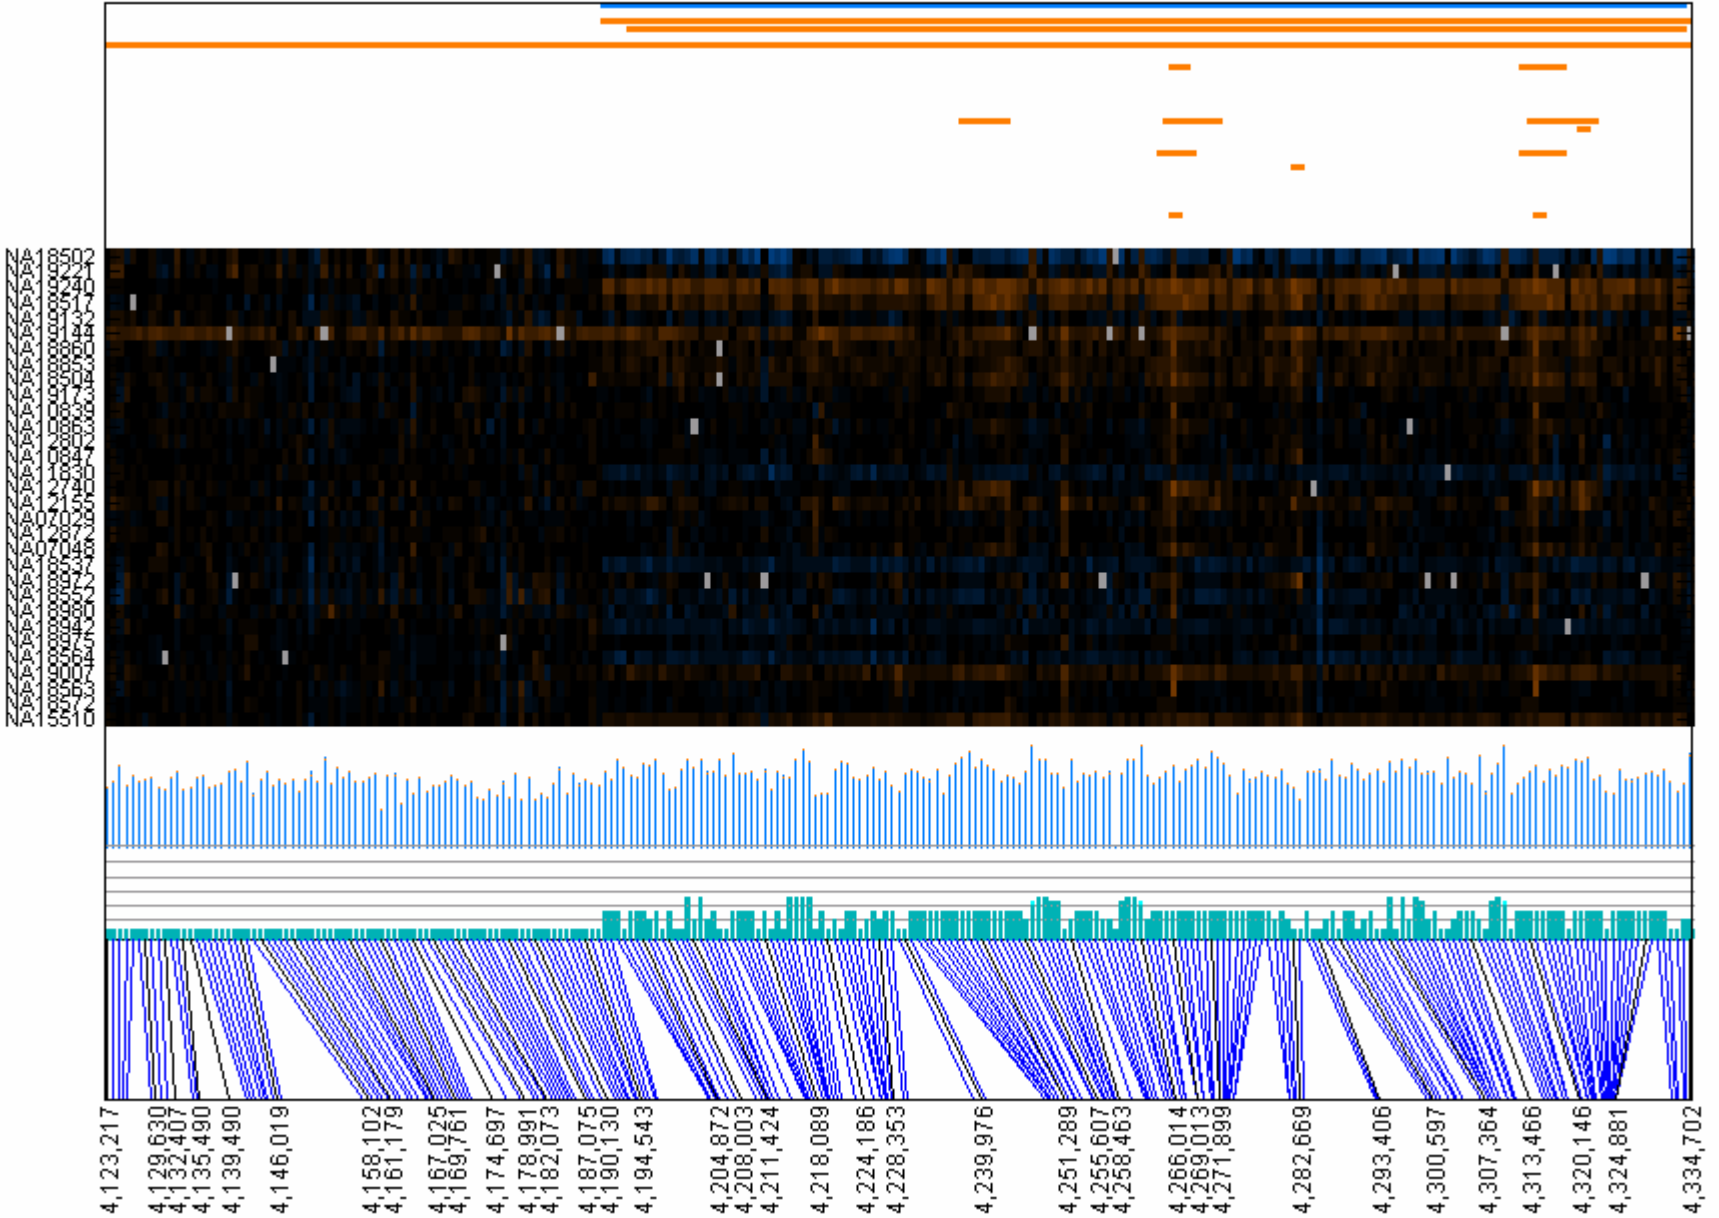

# chr11:055124460-055223084

chr11:055124460-055223084

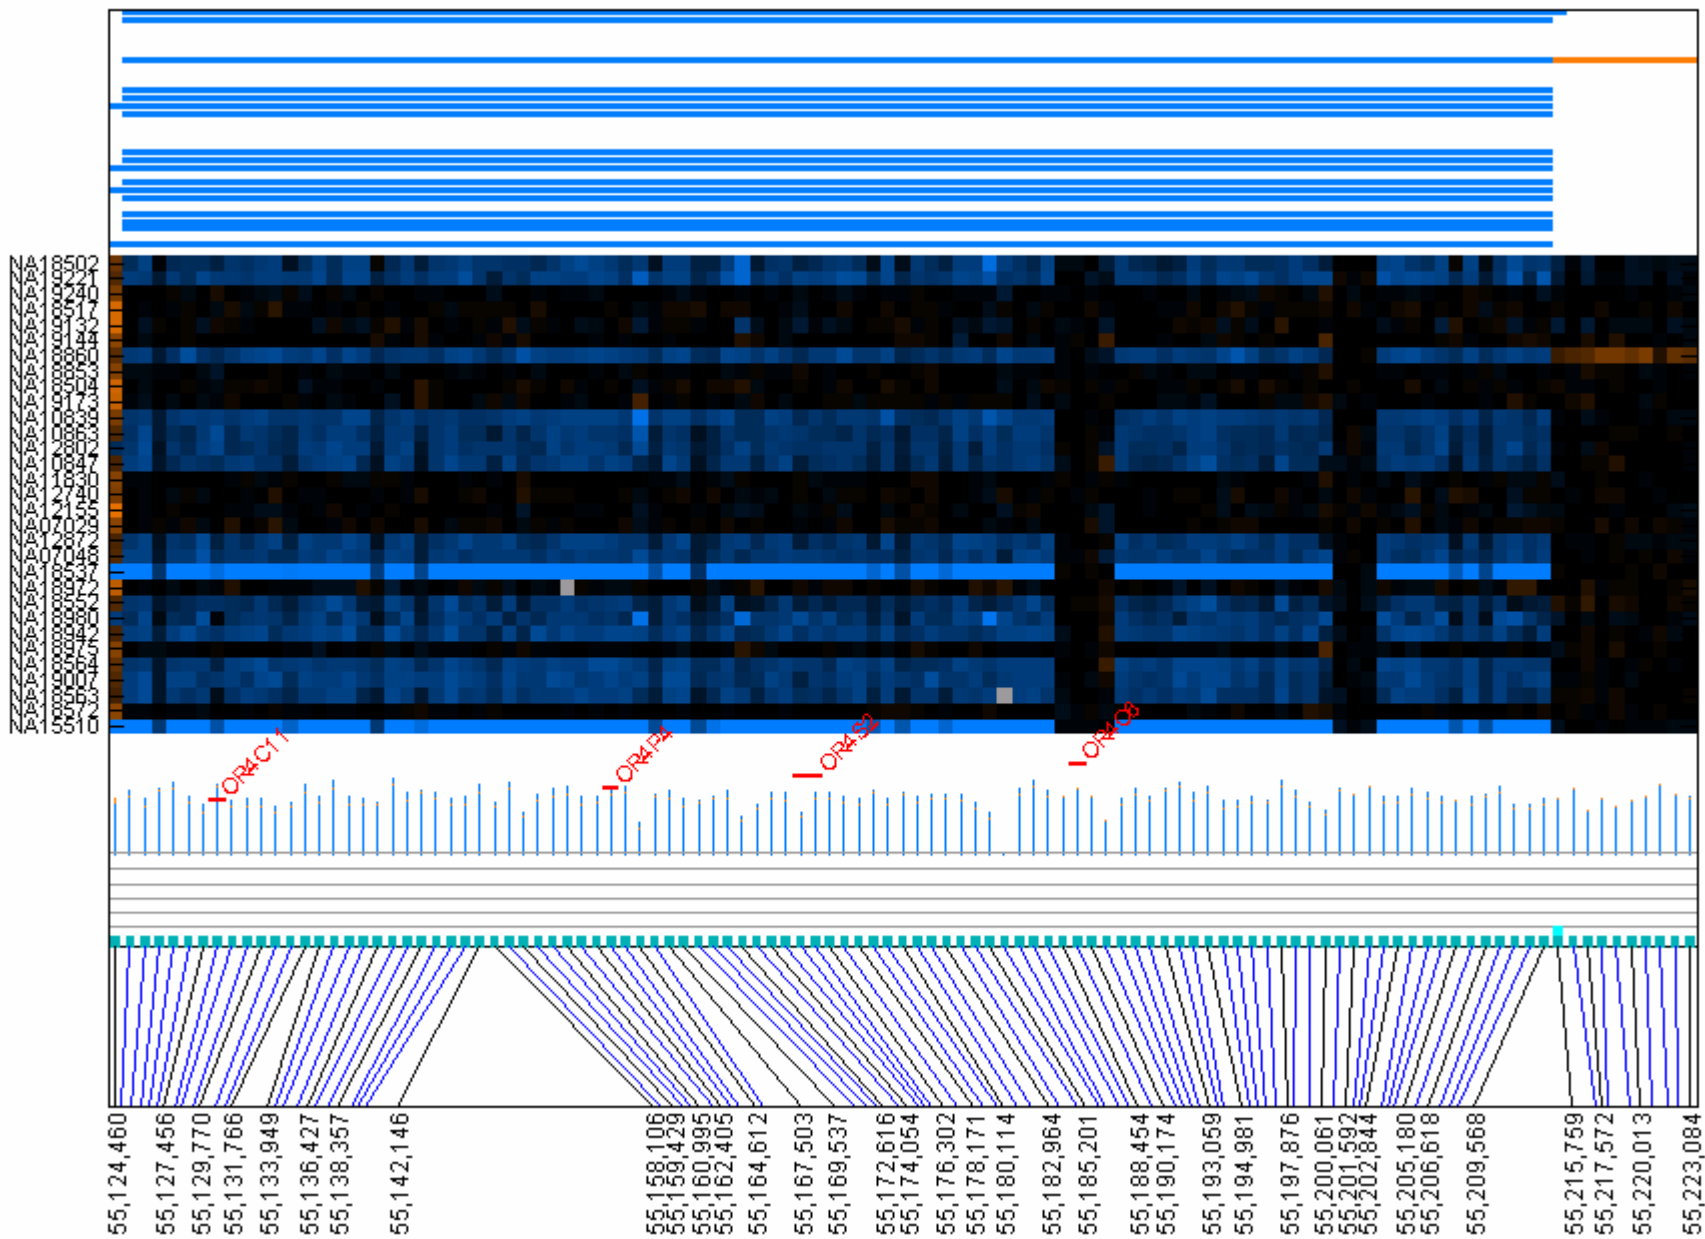



# chr11:134080796-134111845

chr11:134080796-134111845

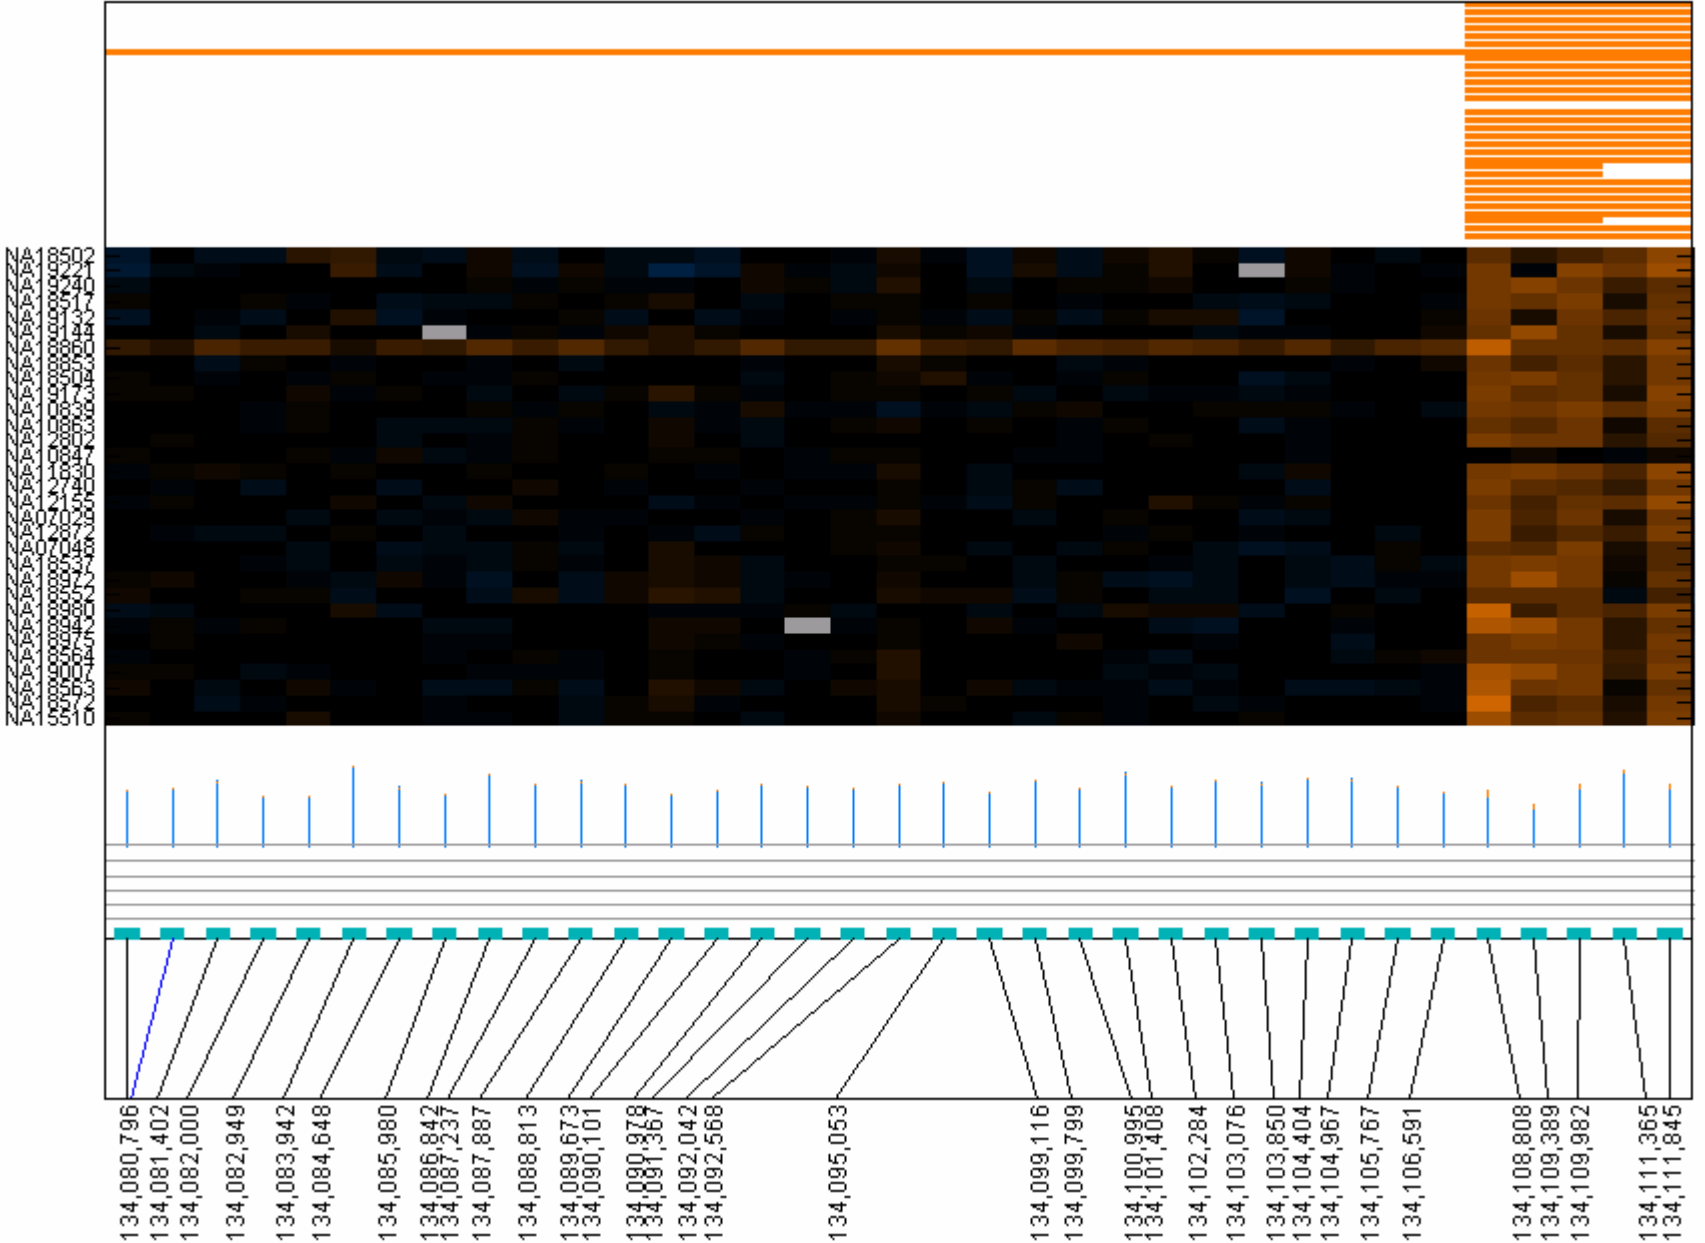

# chr12:031155571-031298687

chr12:031155571-031298687

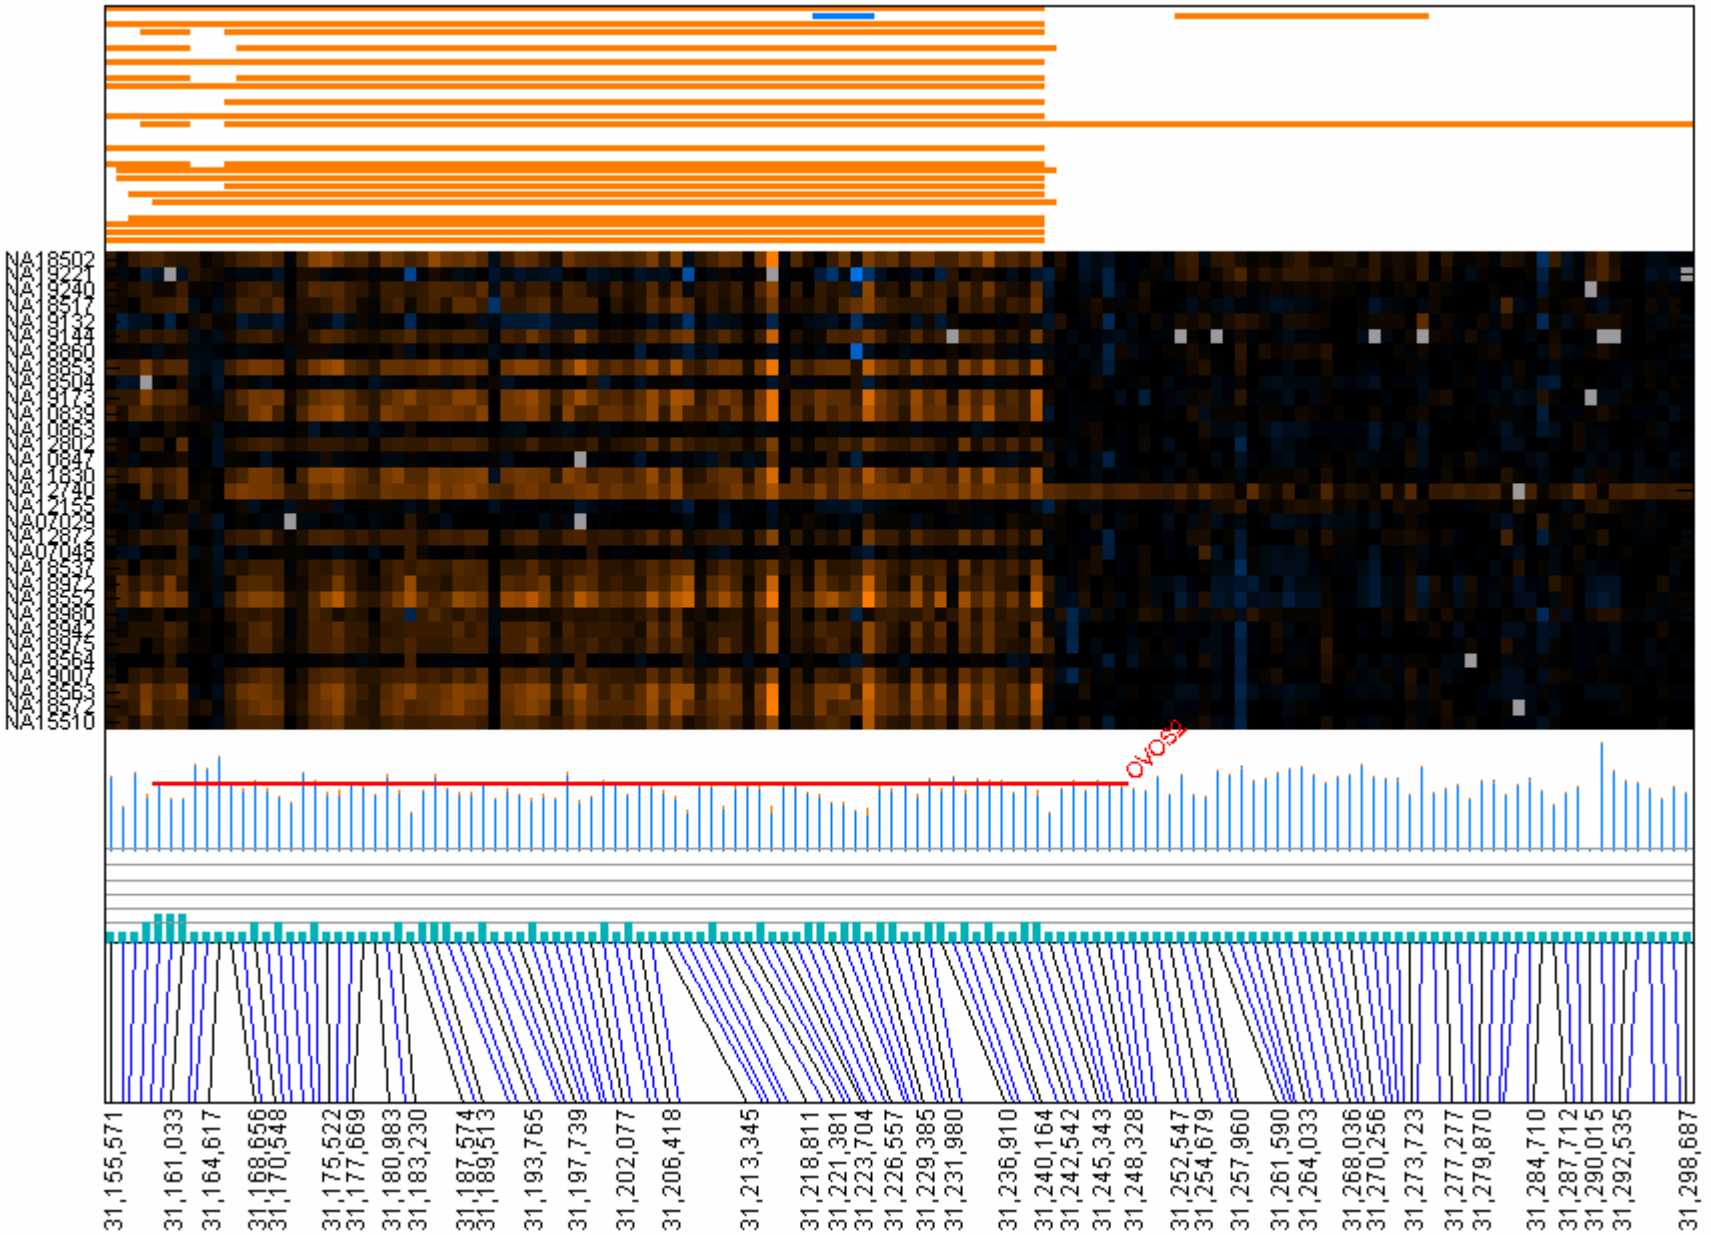

# chr12:046823772-047044291

chr12:046823772-047044291

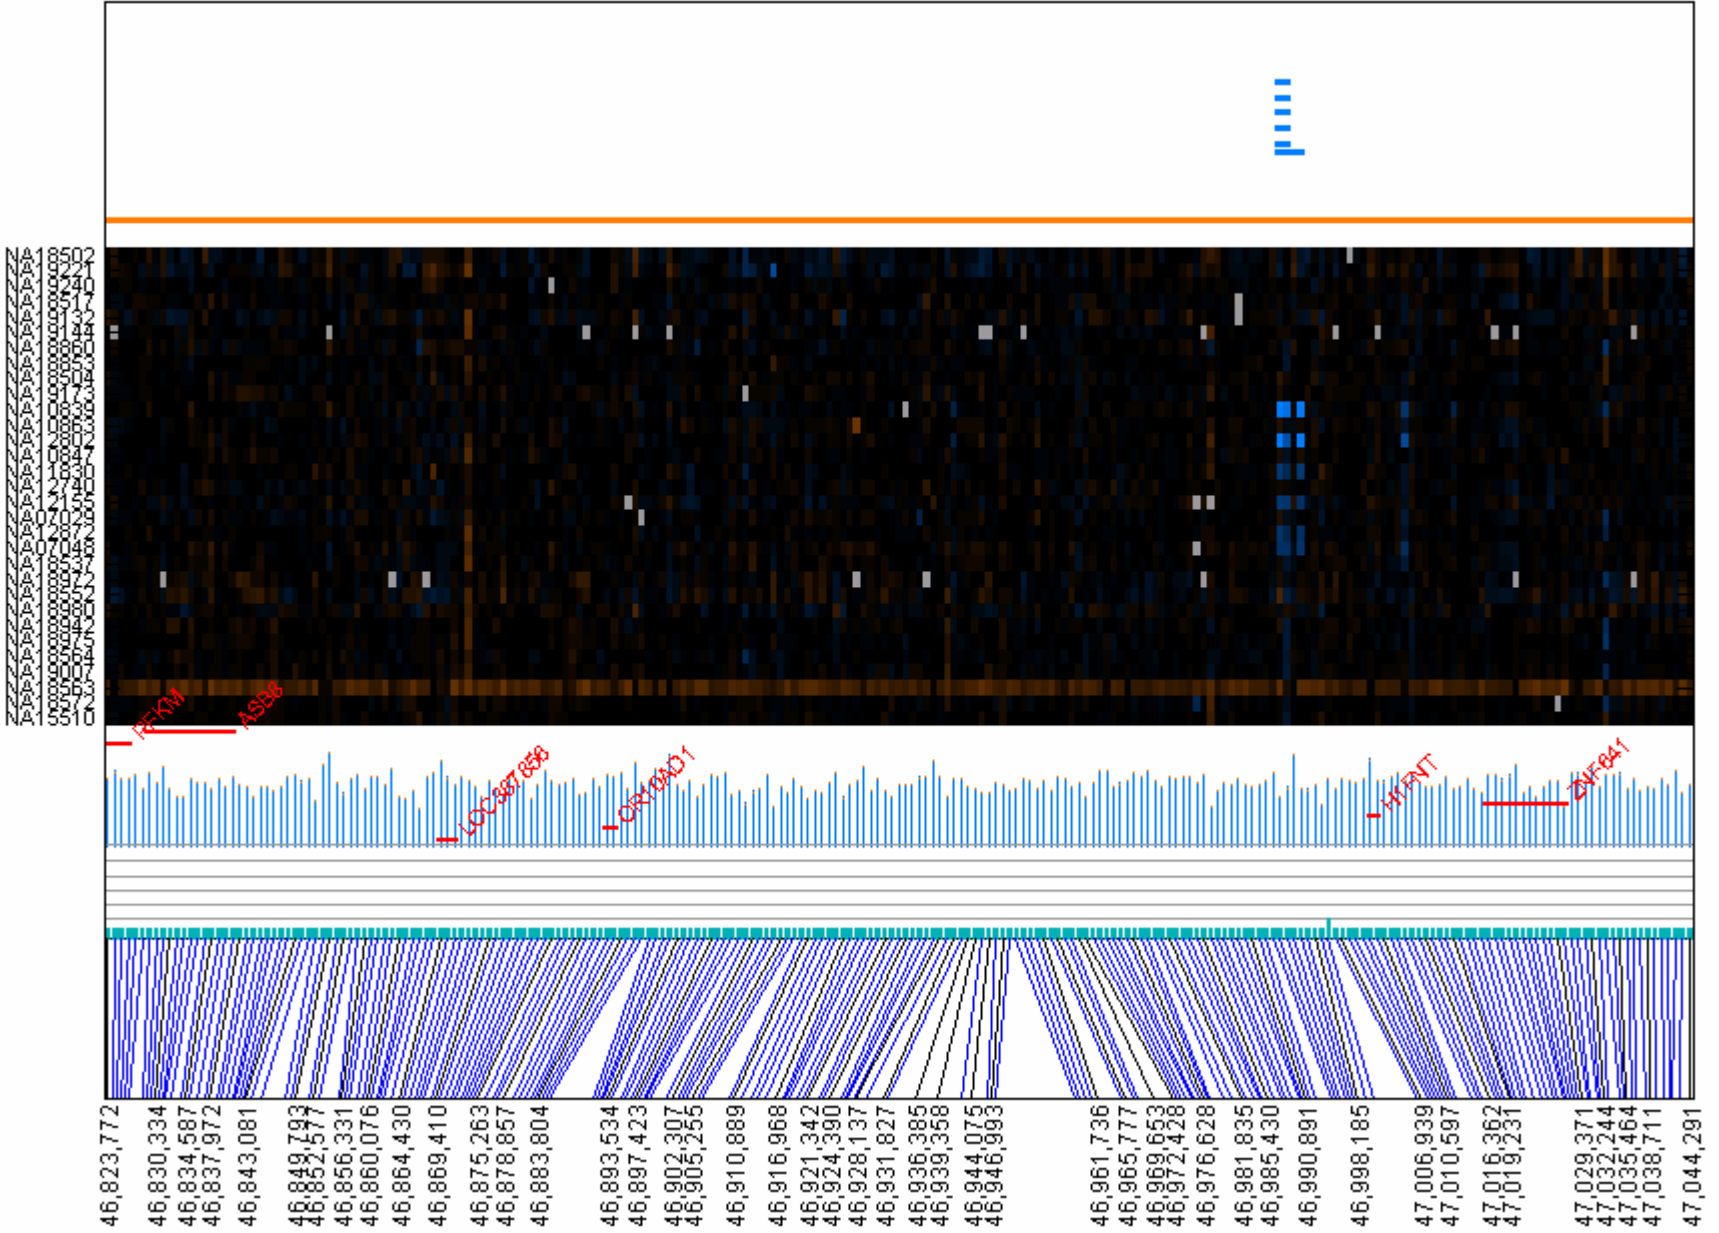

# chr13:056592790-056724259

chr13:056592790-056724259

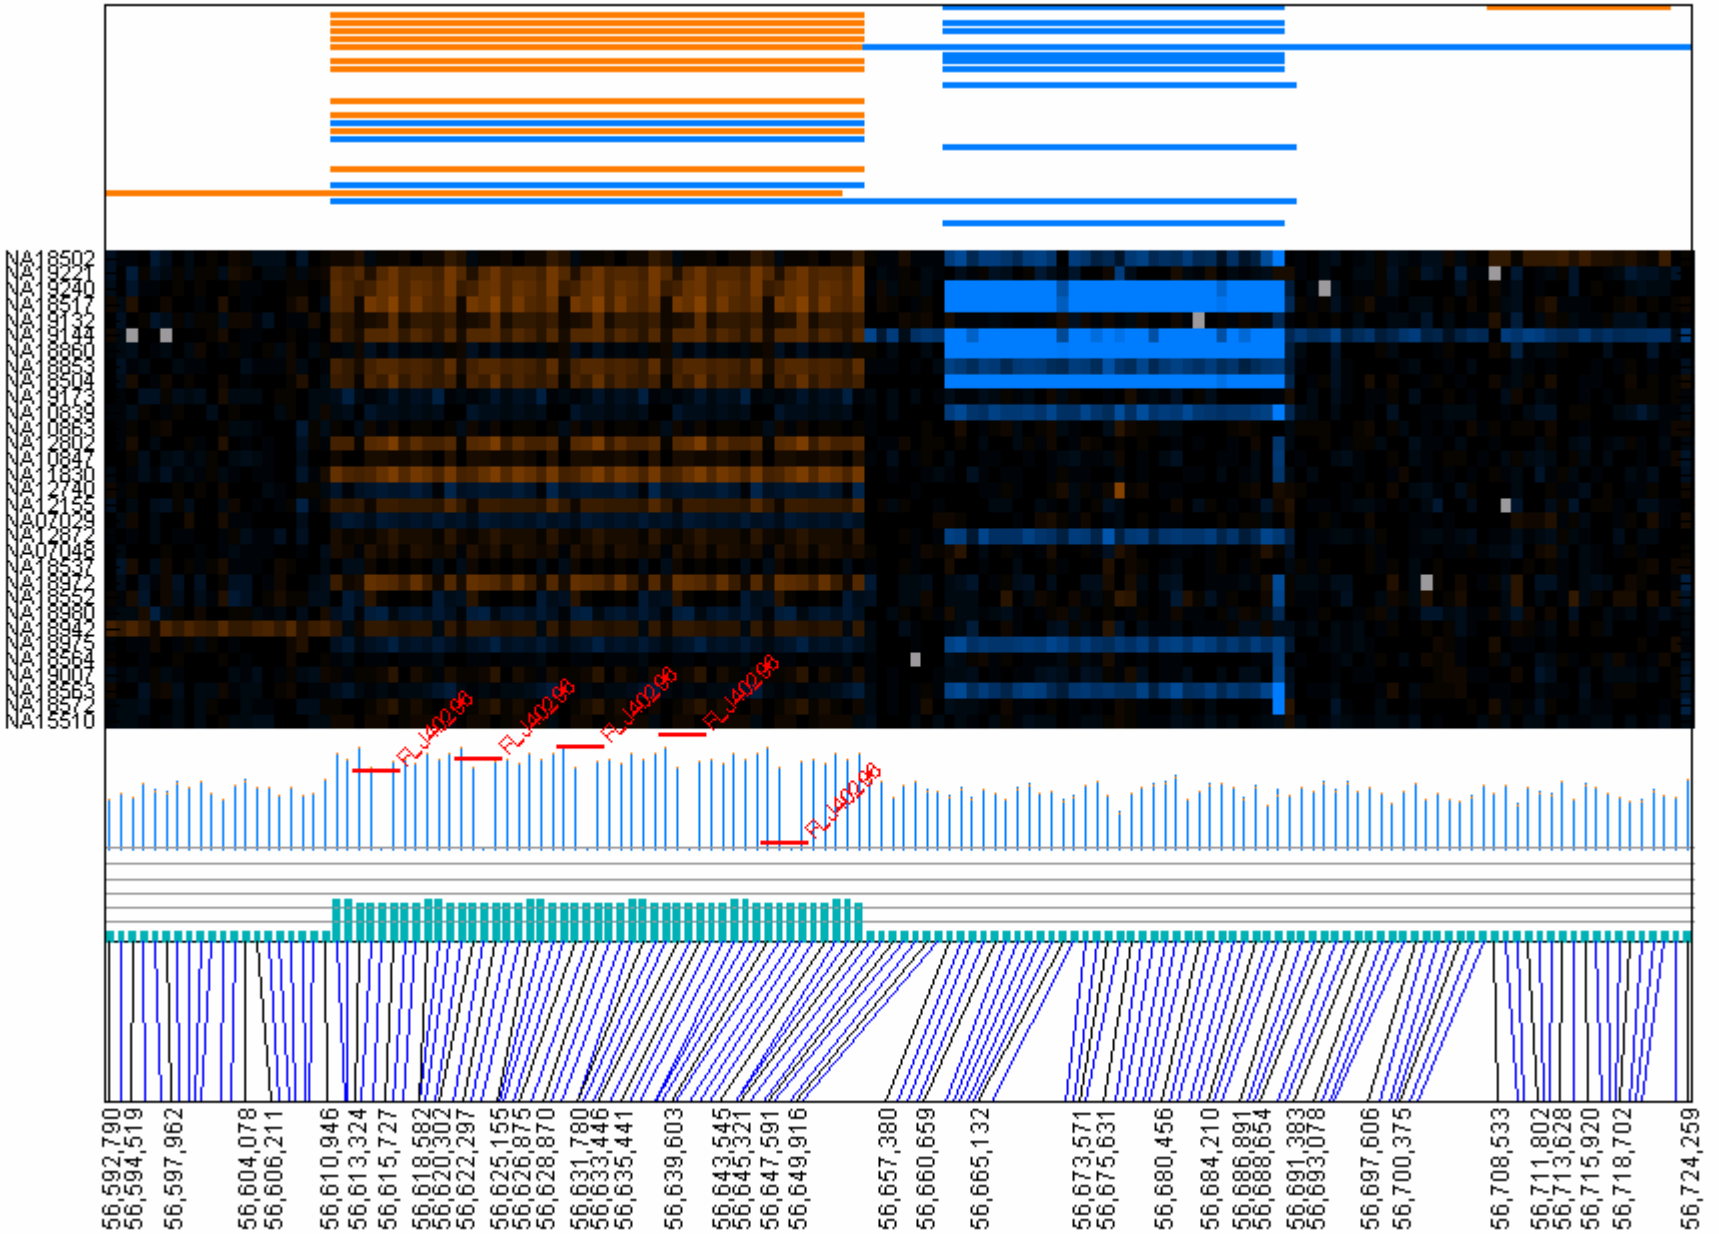

# chr14:018187182-019494444

chr14:018187182-019494444

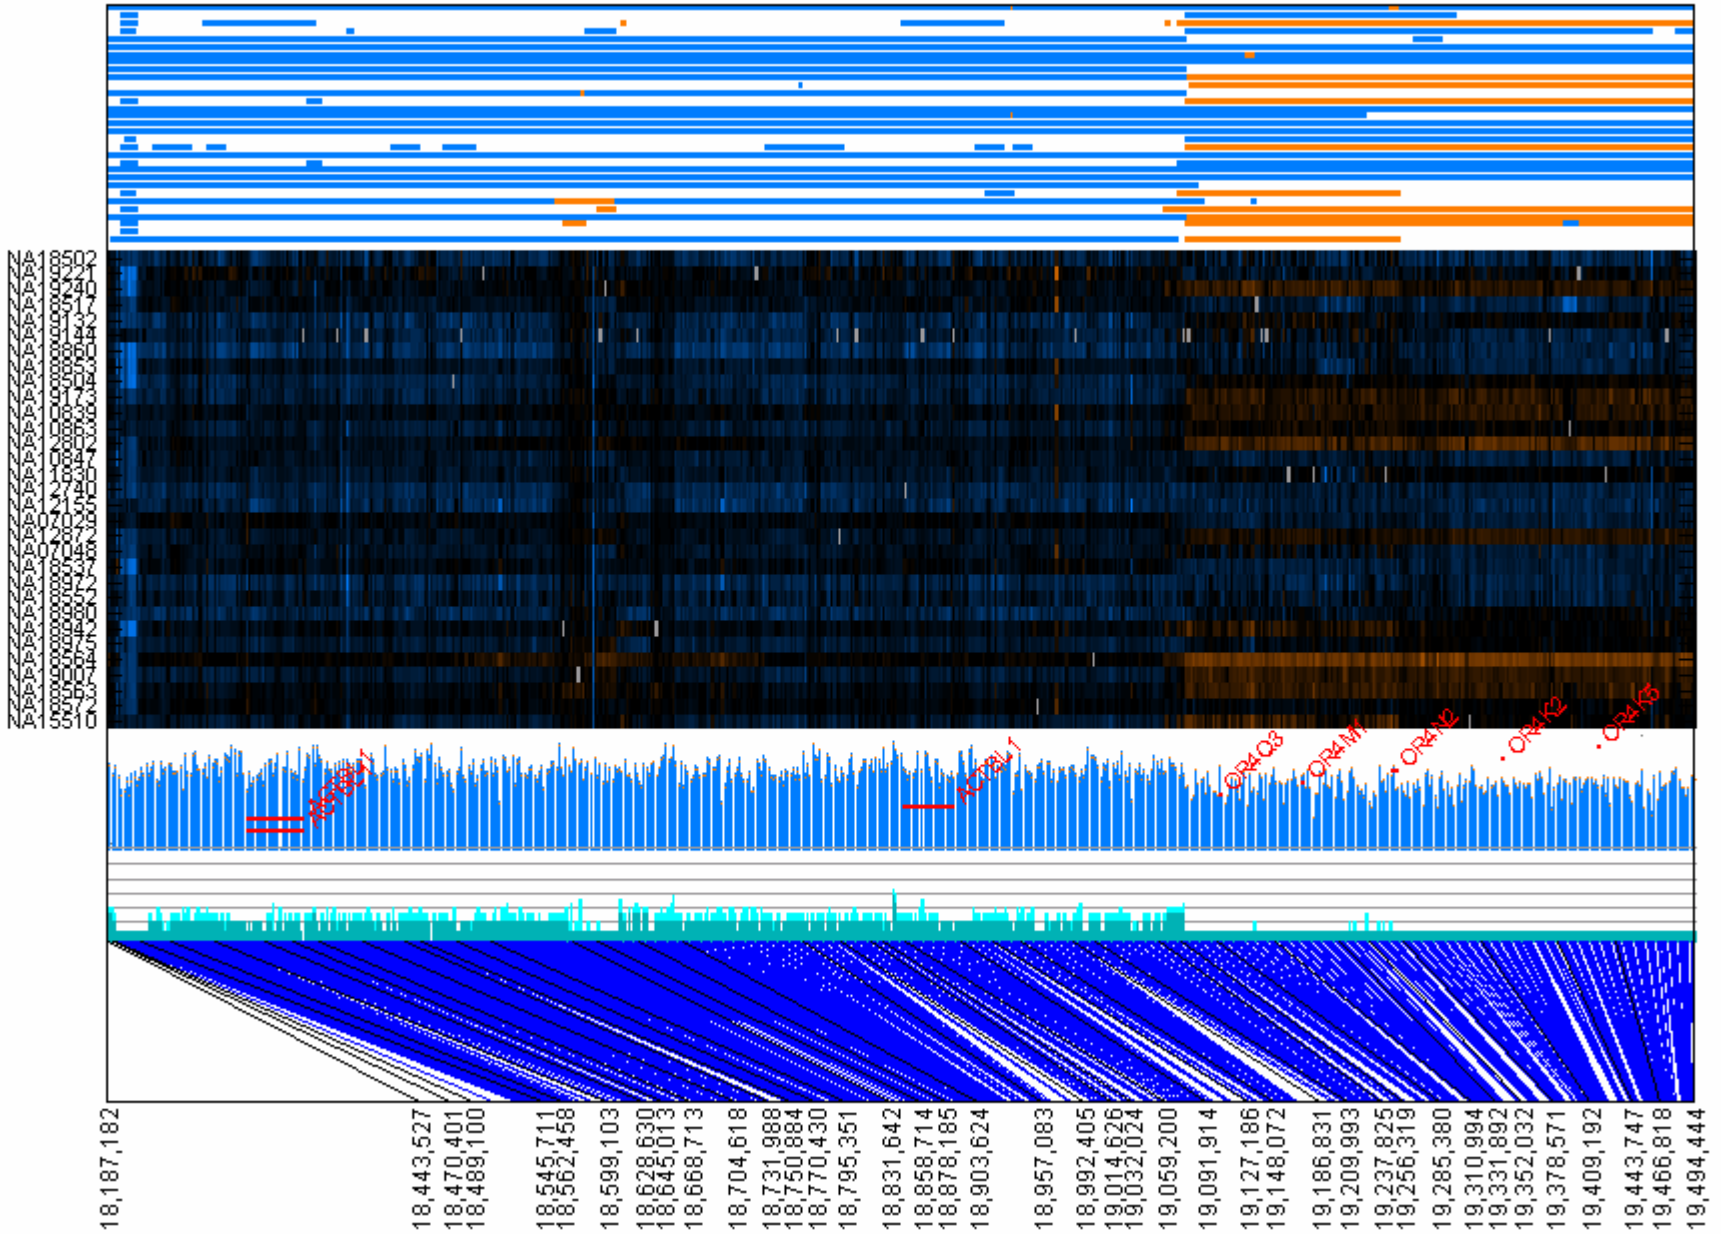

# chr14:020412332-020495617

chr14:020412332-020495617

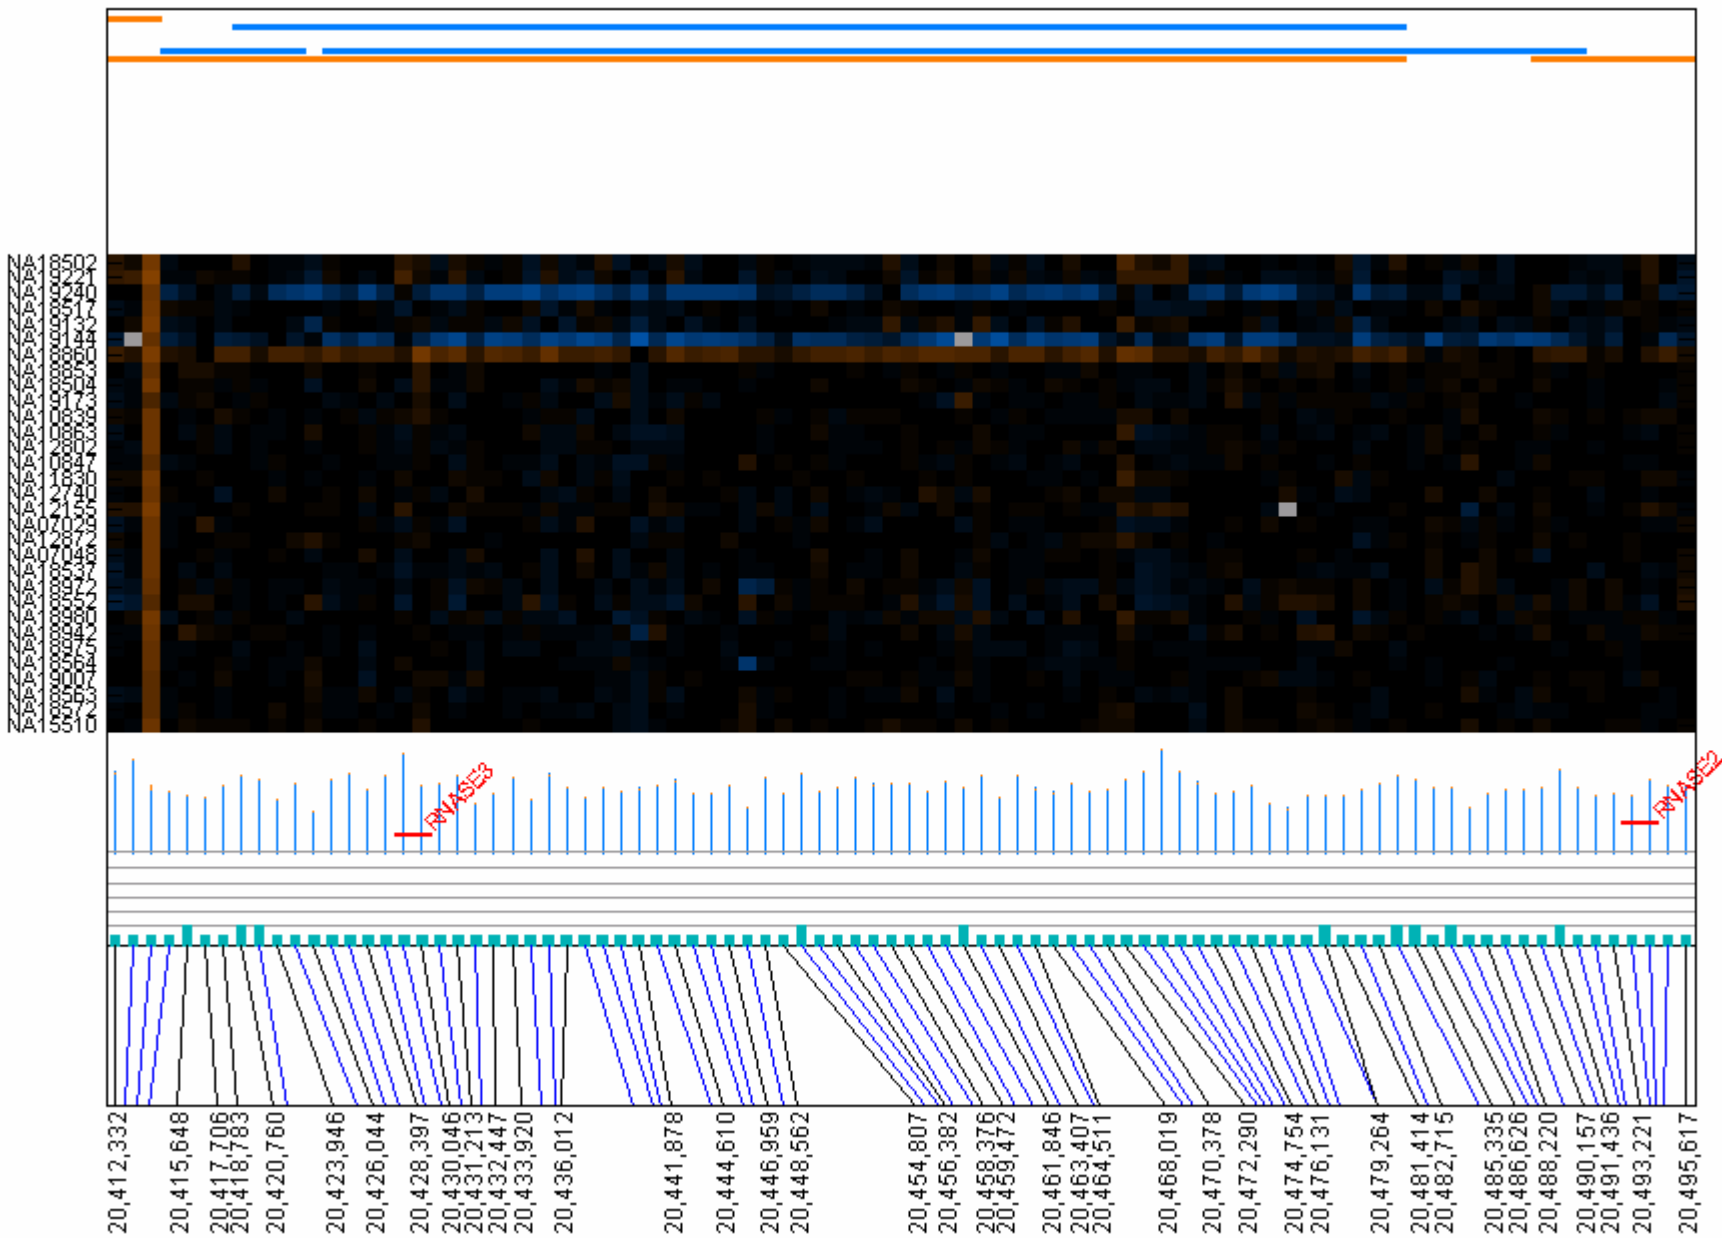

# chr14:073064476-073122227

chr14:073064476-073122227

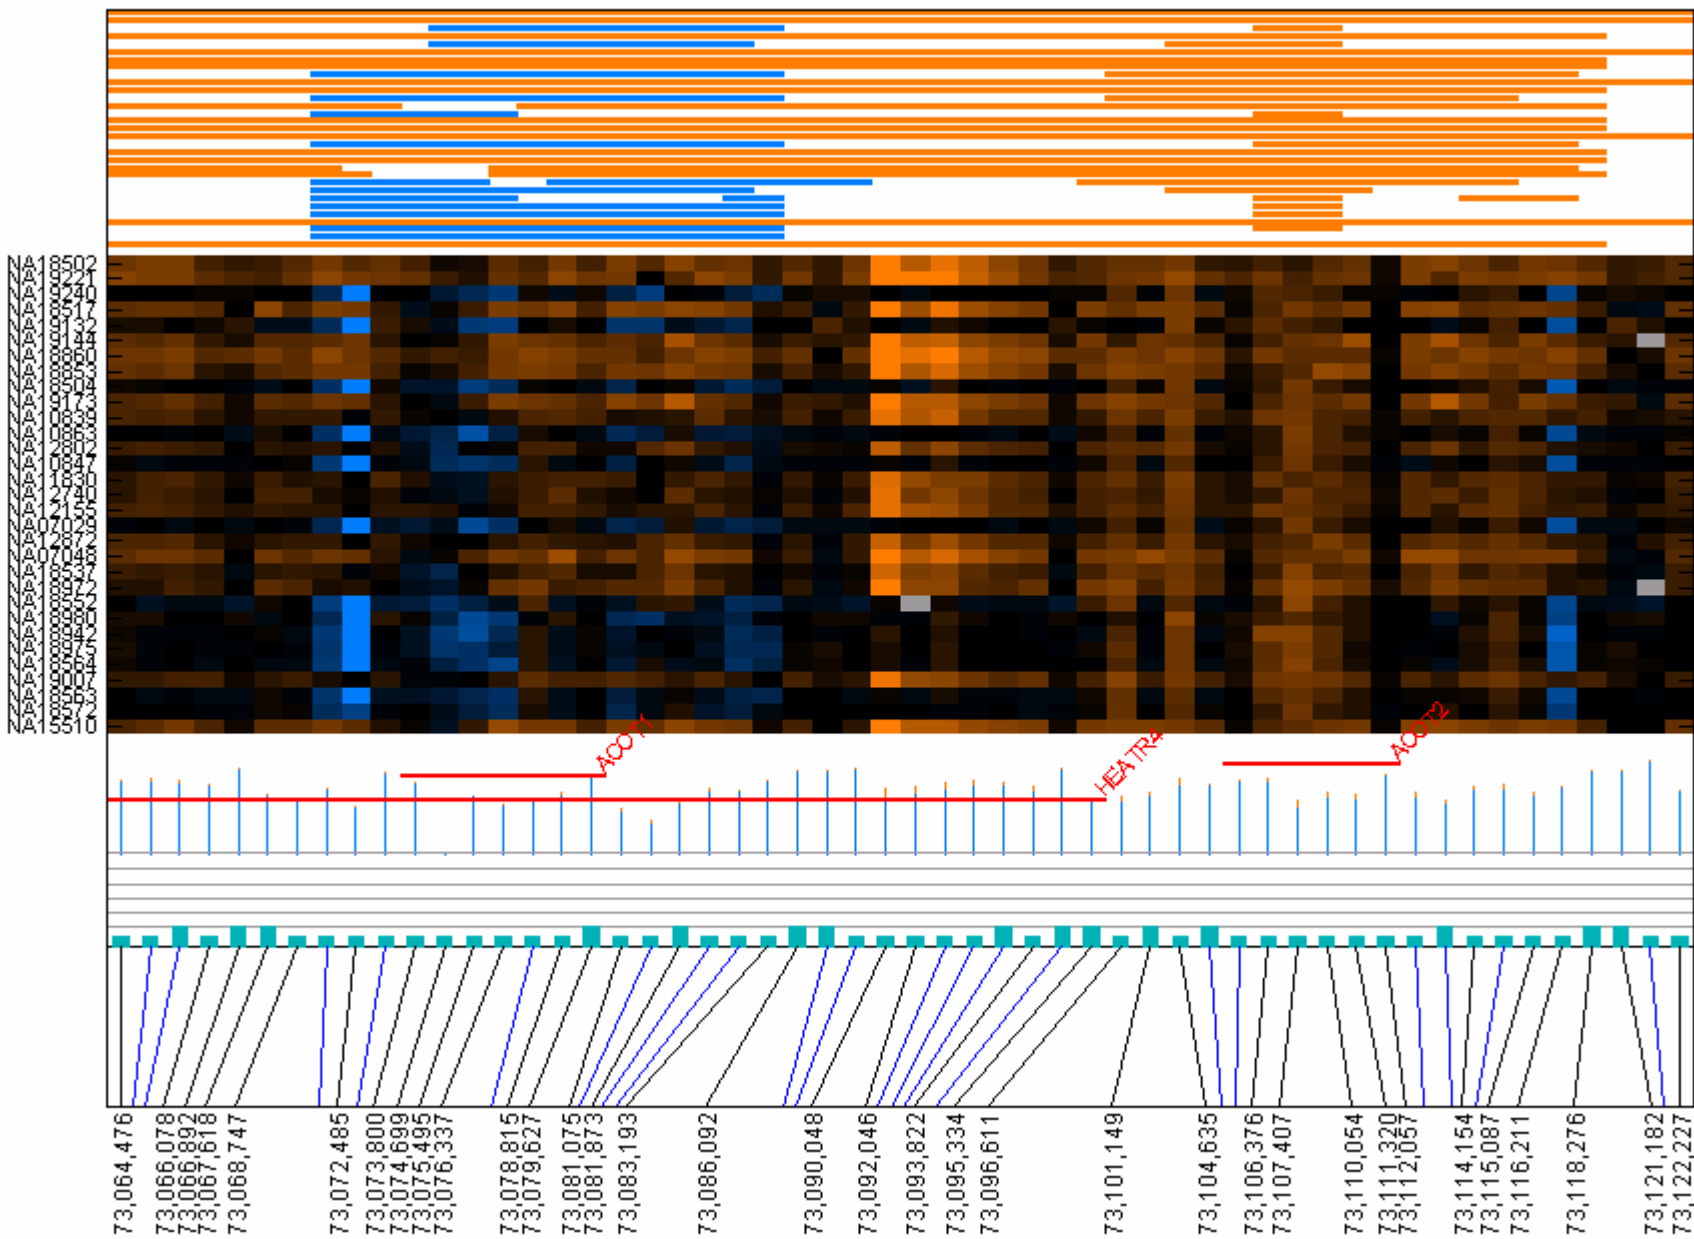

# chr15:018432942-020304002

chr15:018432942-020304002

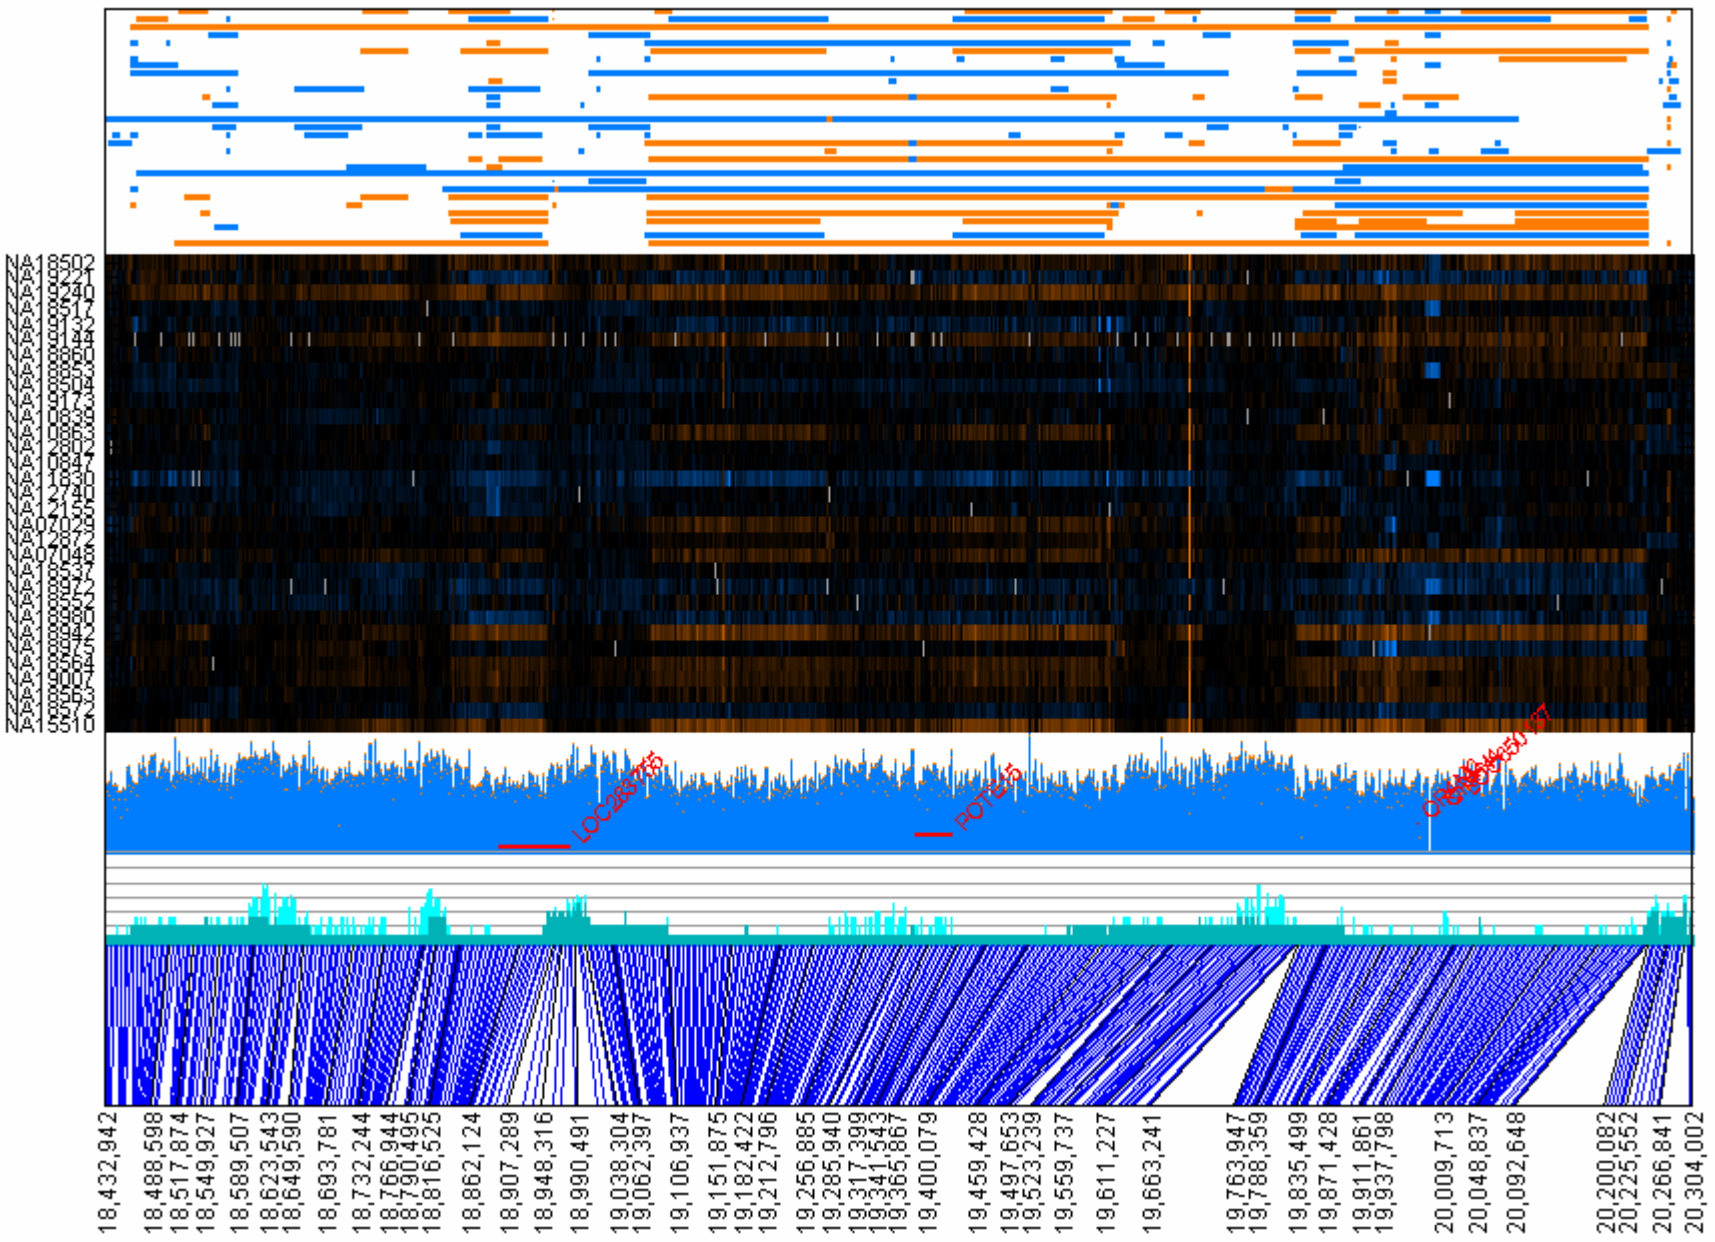



# chr15:020748904-021128191

chr15:020748904-021128191

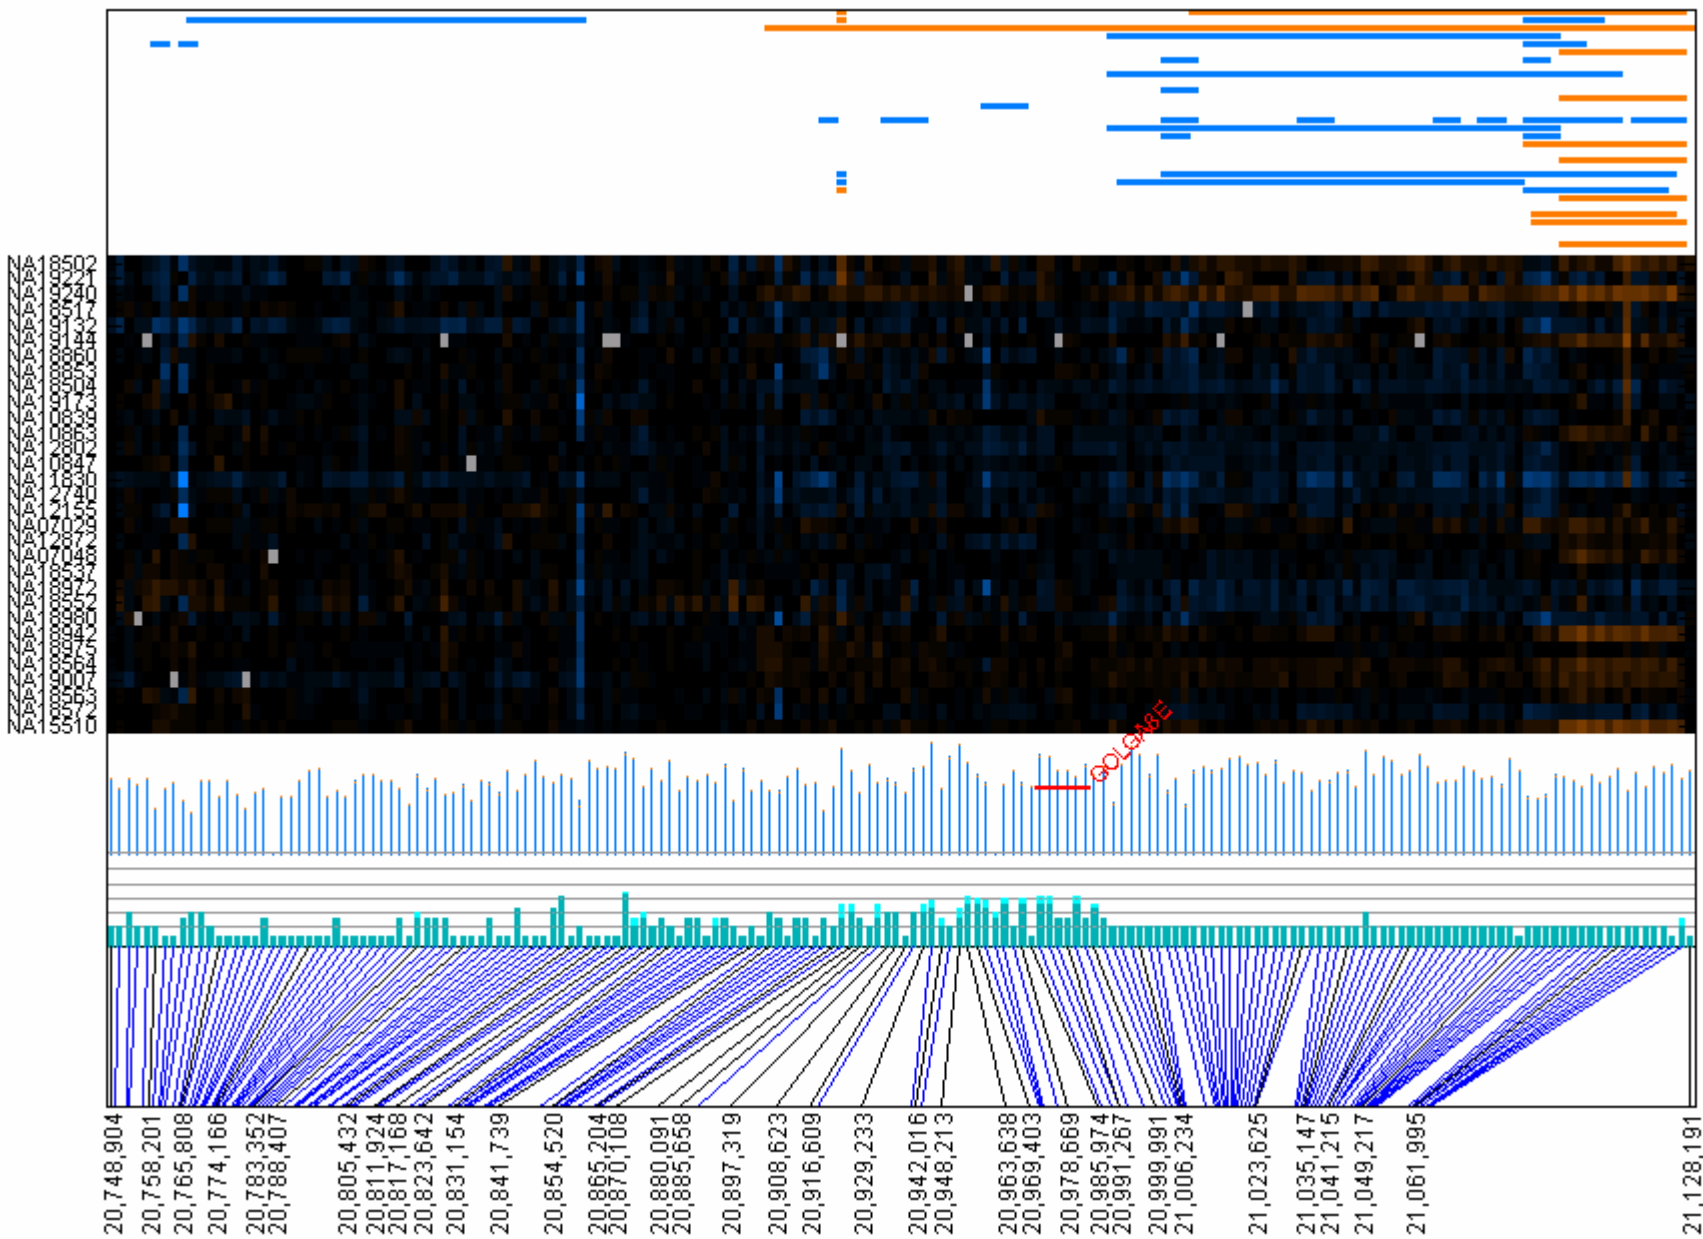

# chr15:021876351-022345311

chr15:021876351-022345311

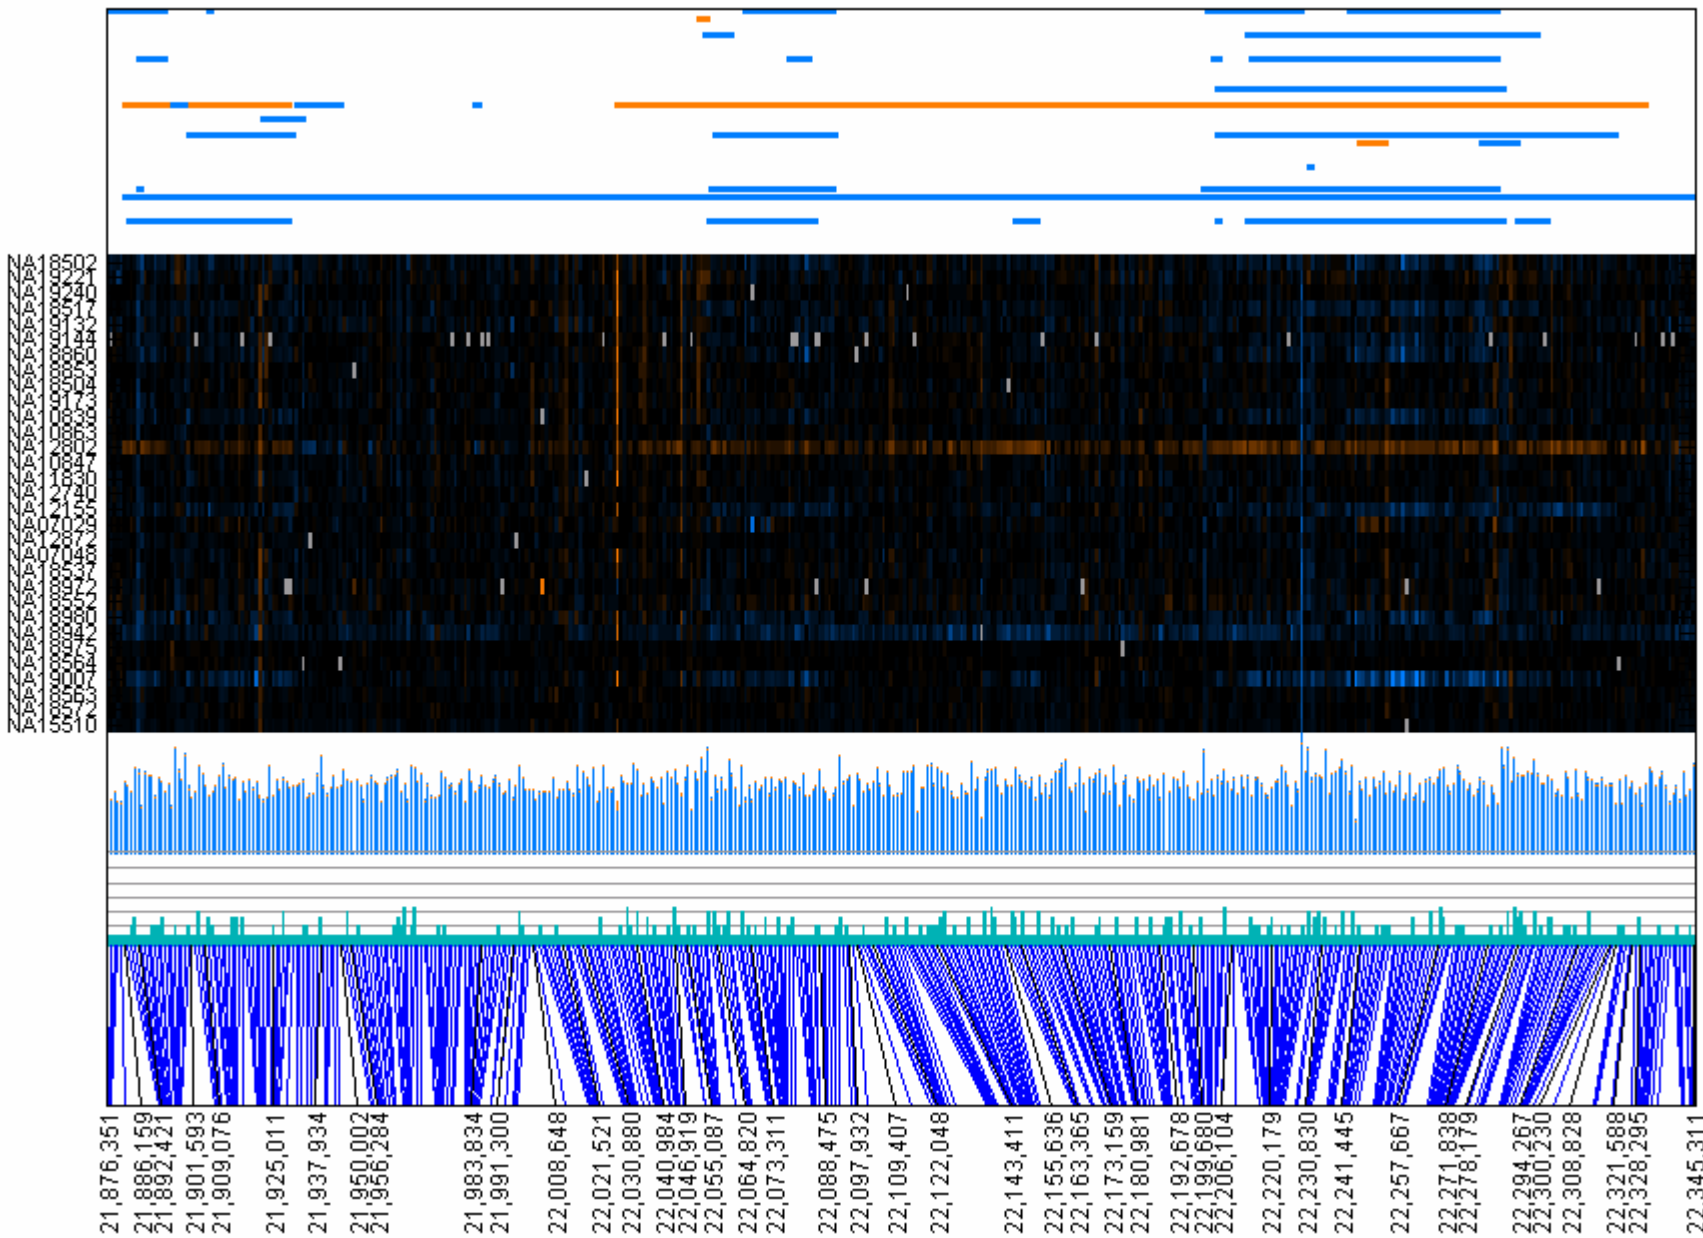

# chr15:028160308-028876966

chr15:028160308-028876966

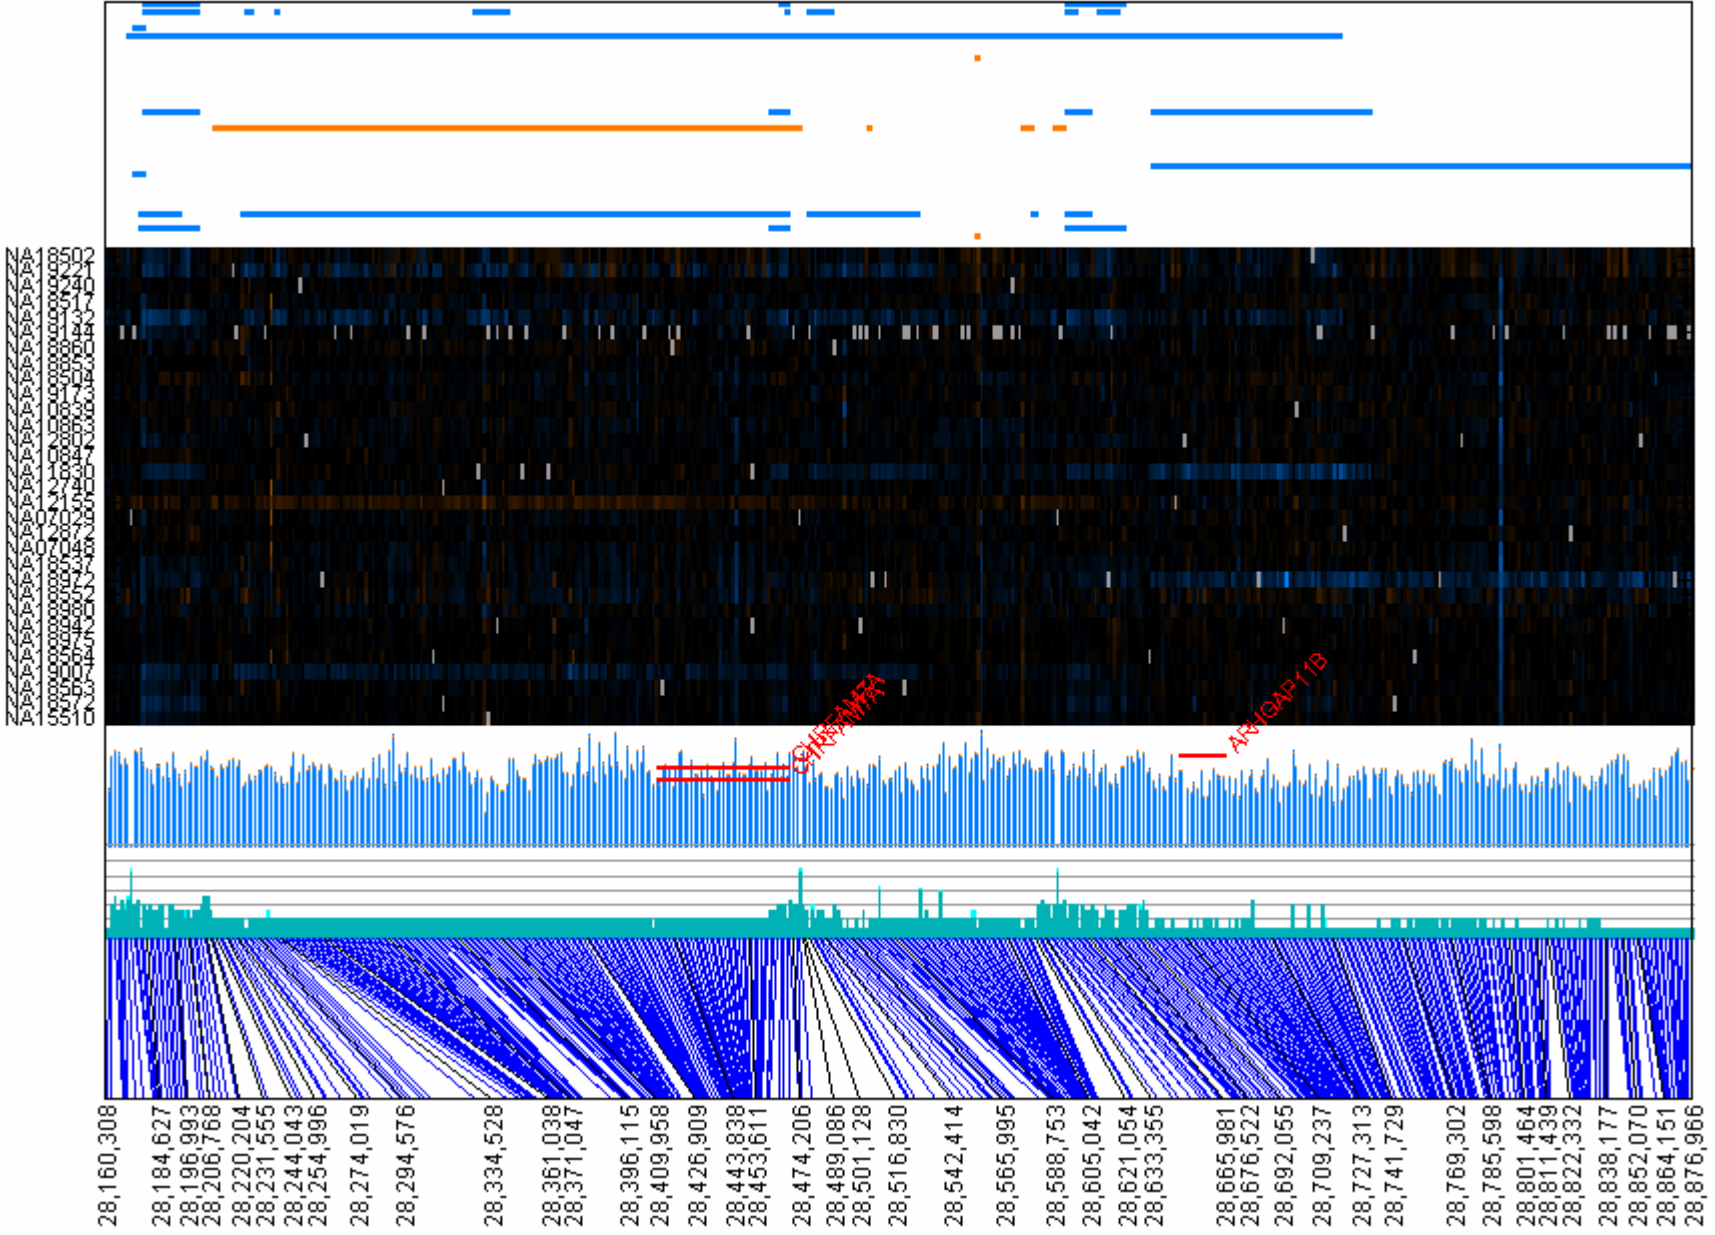

# chr15:029704319-030712376

chr15:029704319-030712376

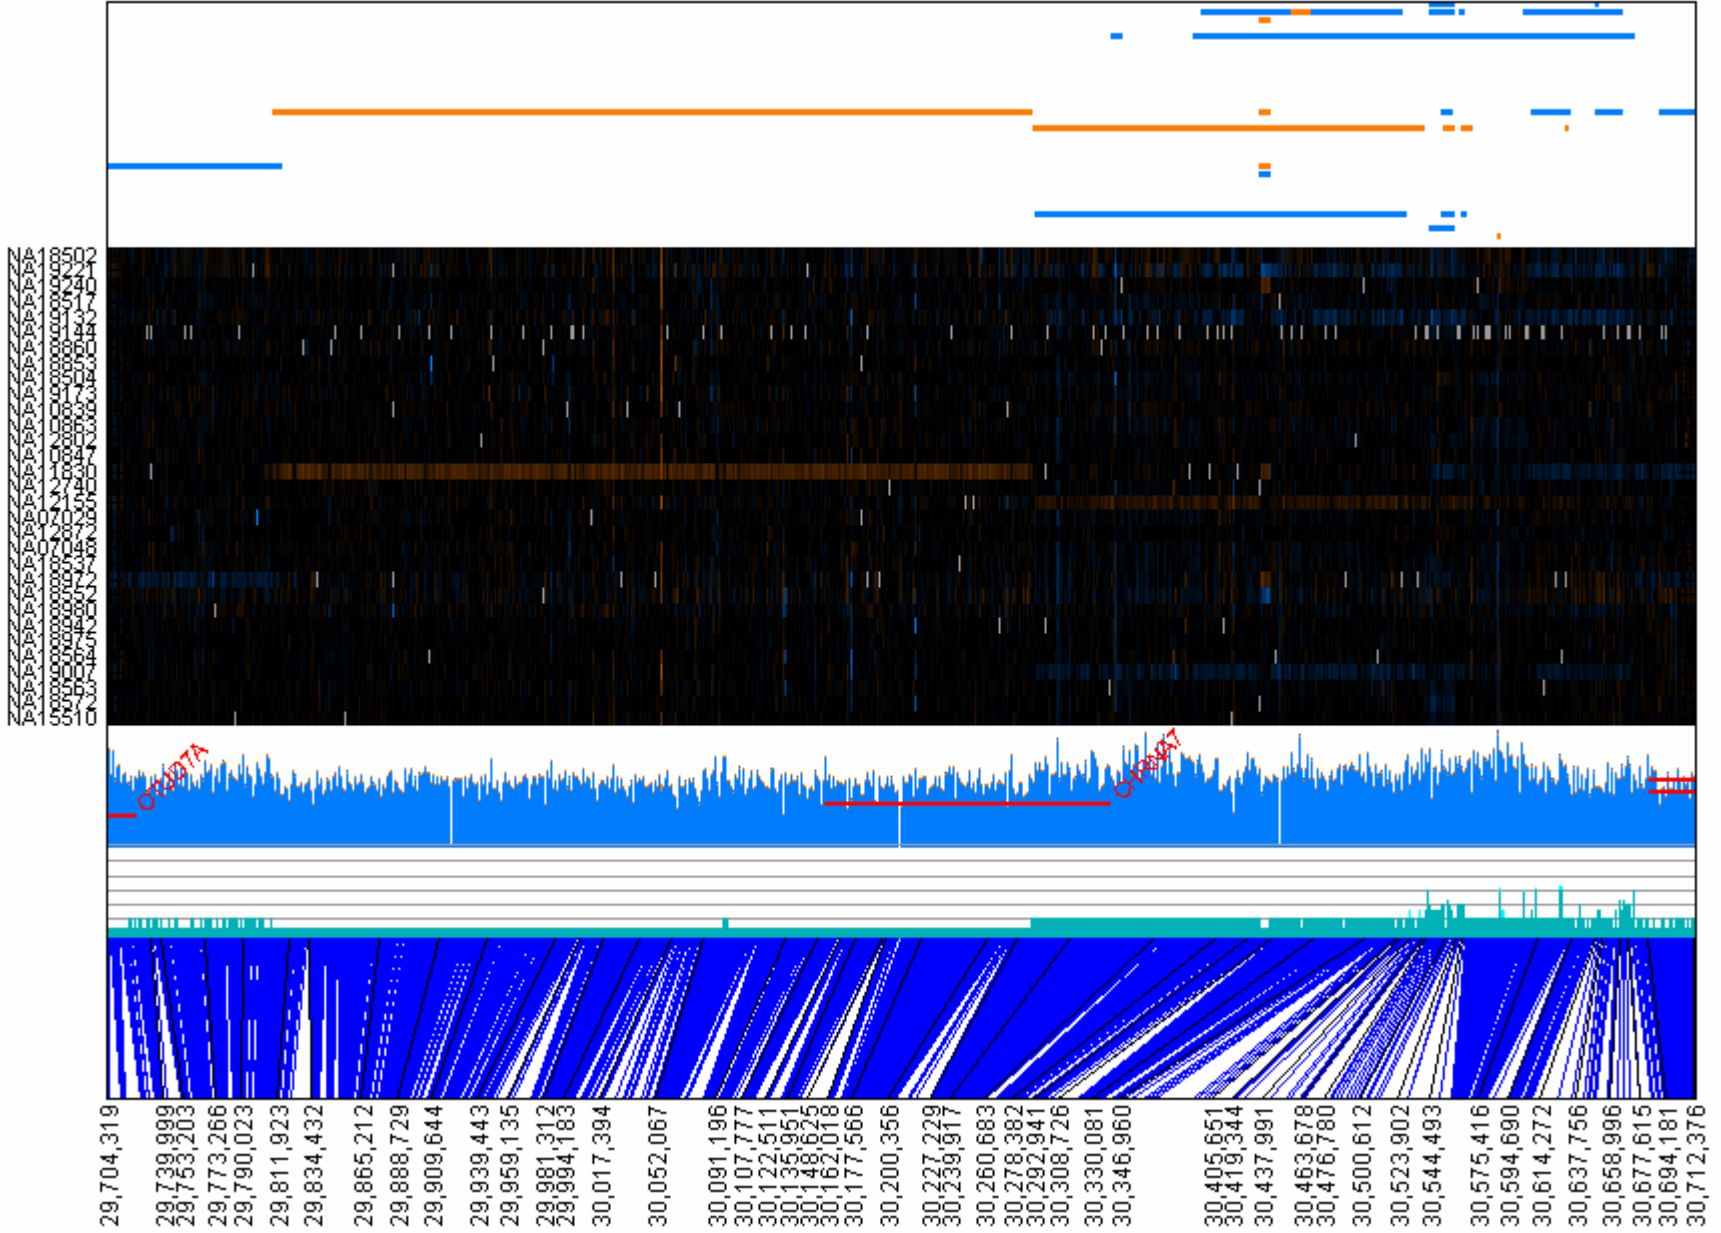

# chr16:000946345-000952191

chr16:000946345-000952191

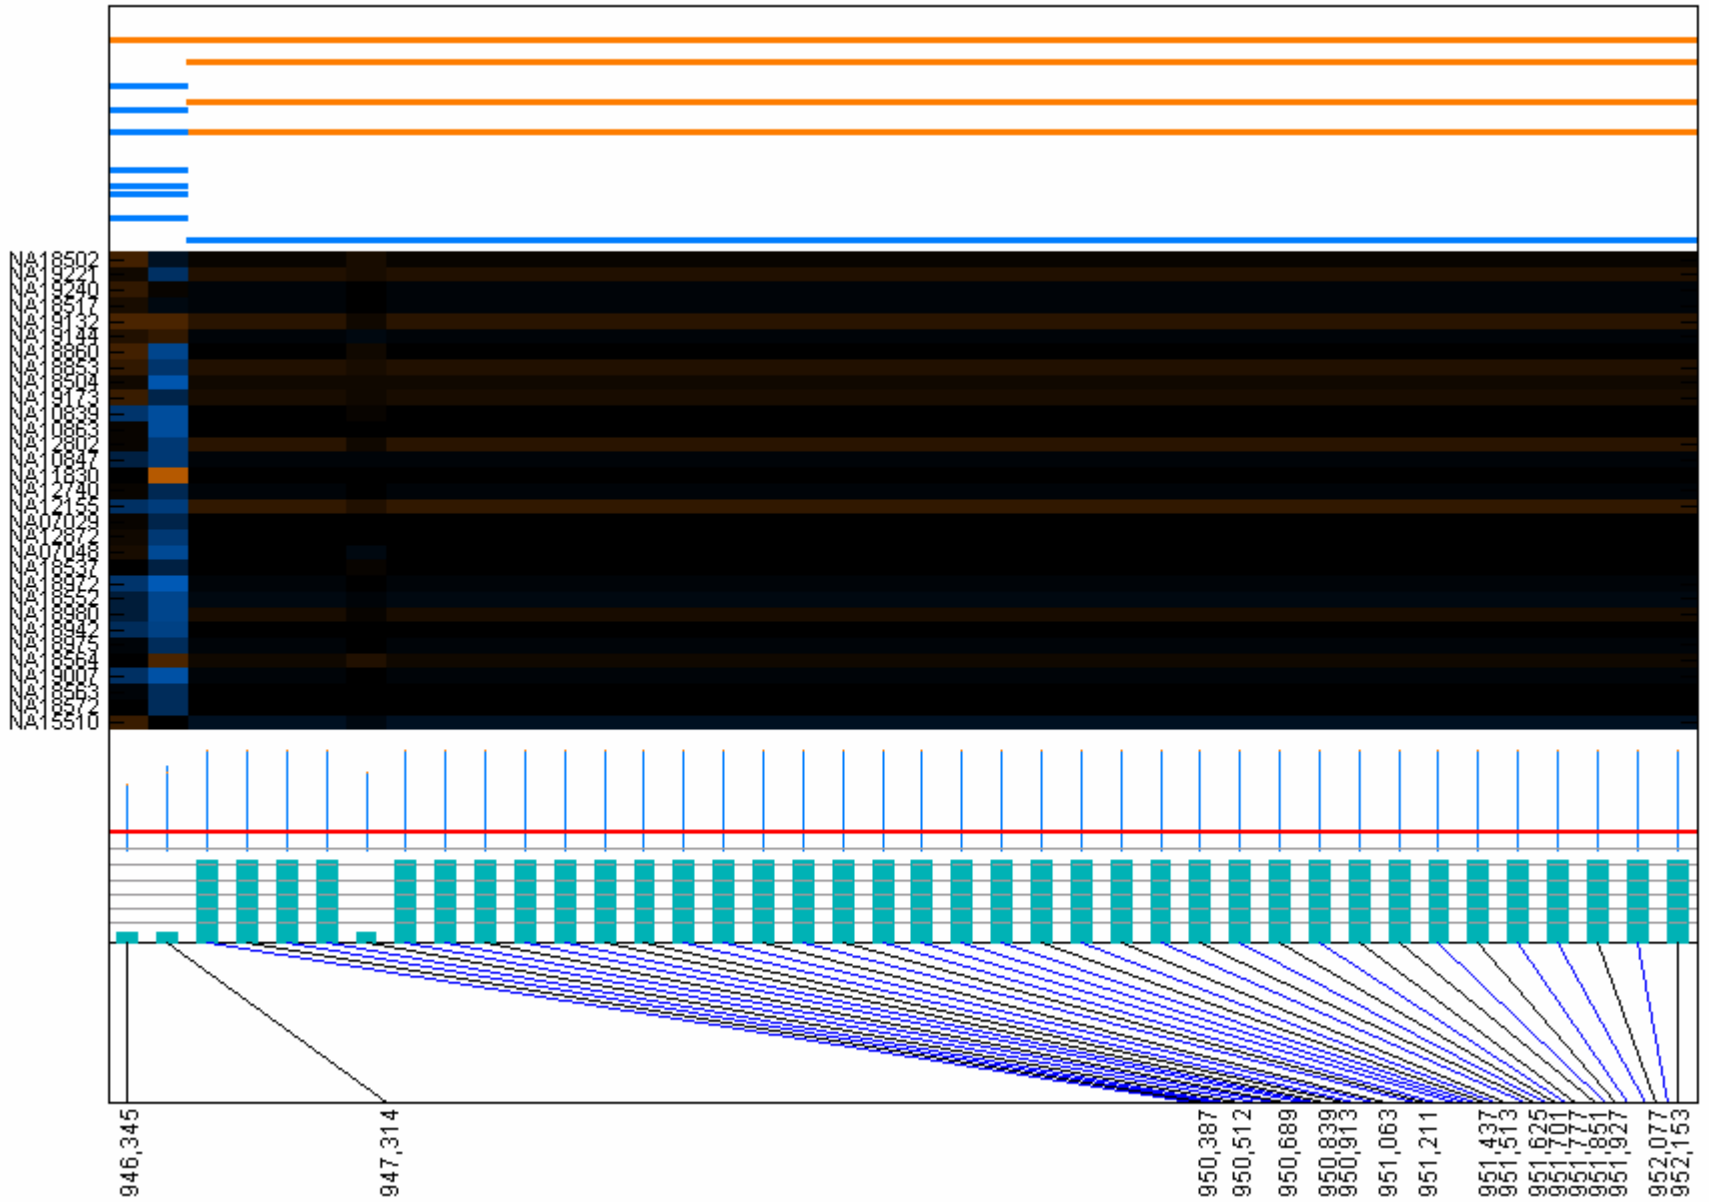

# chr16:021343075-021845920

chr16:021343075-021845920

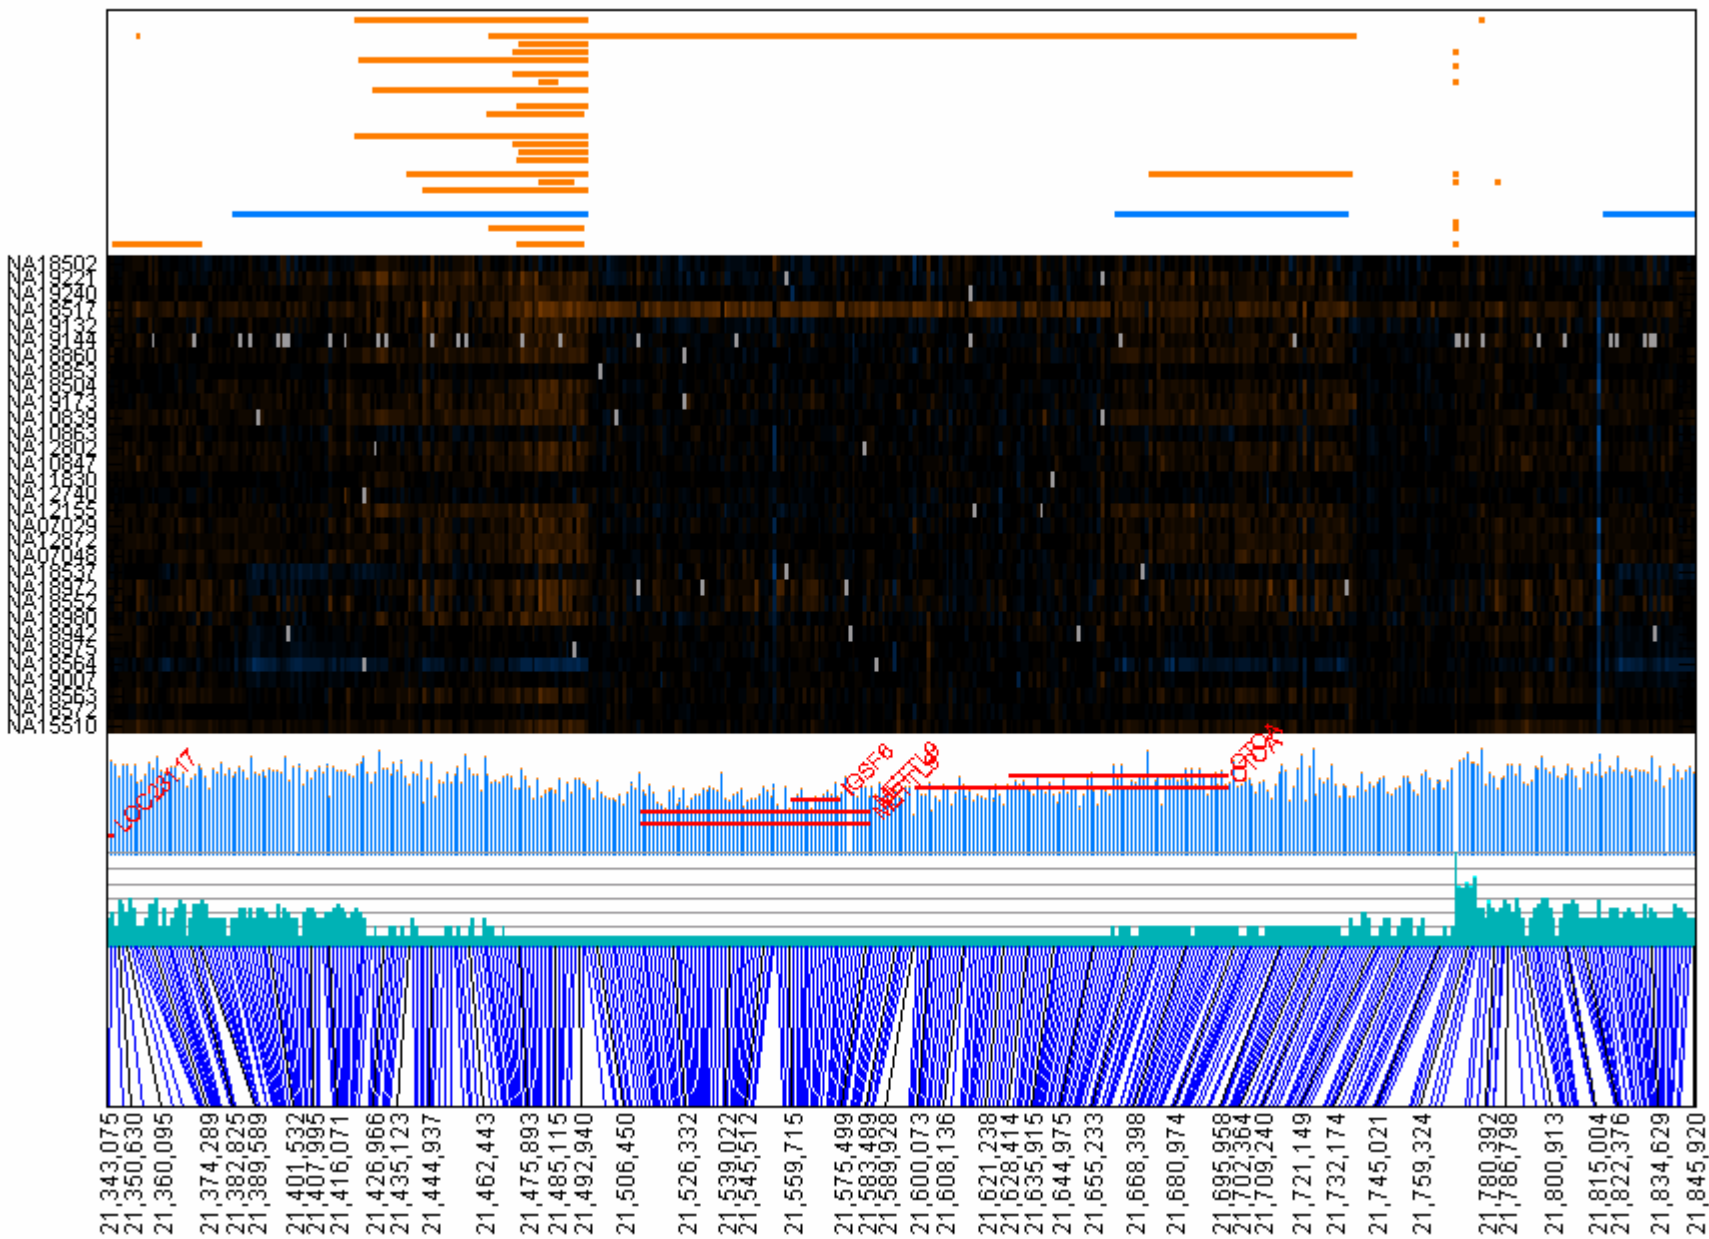

# chr16:028283717-028366478

chr16:028283717-028366478

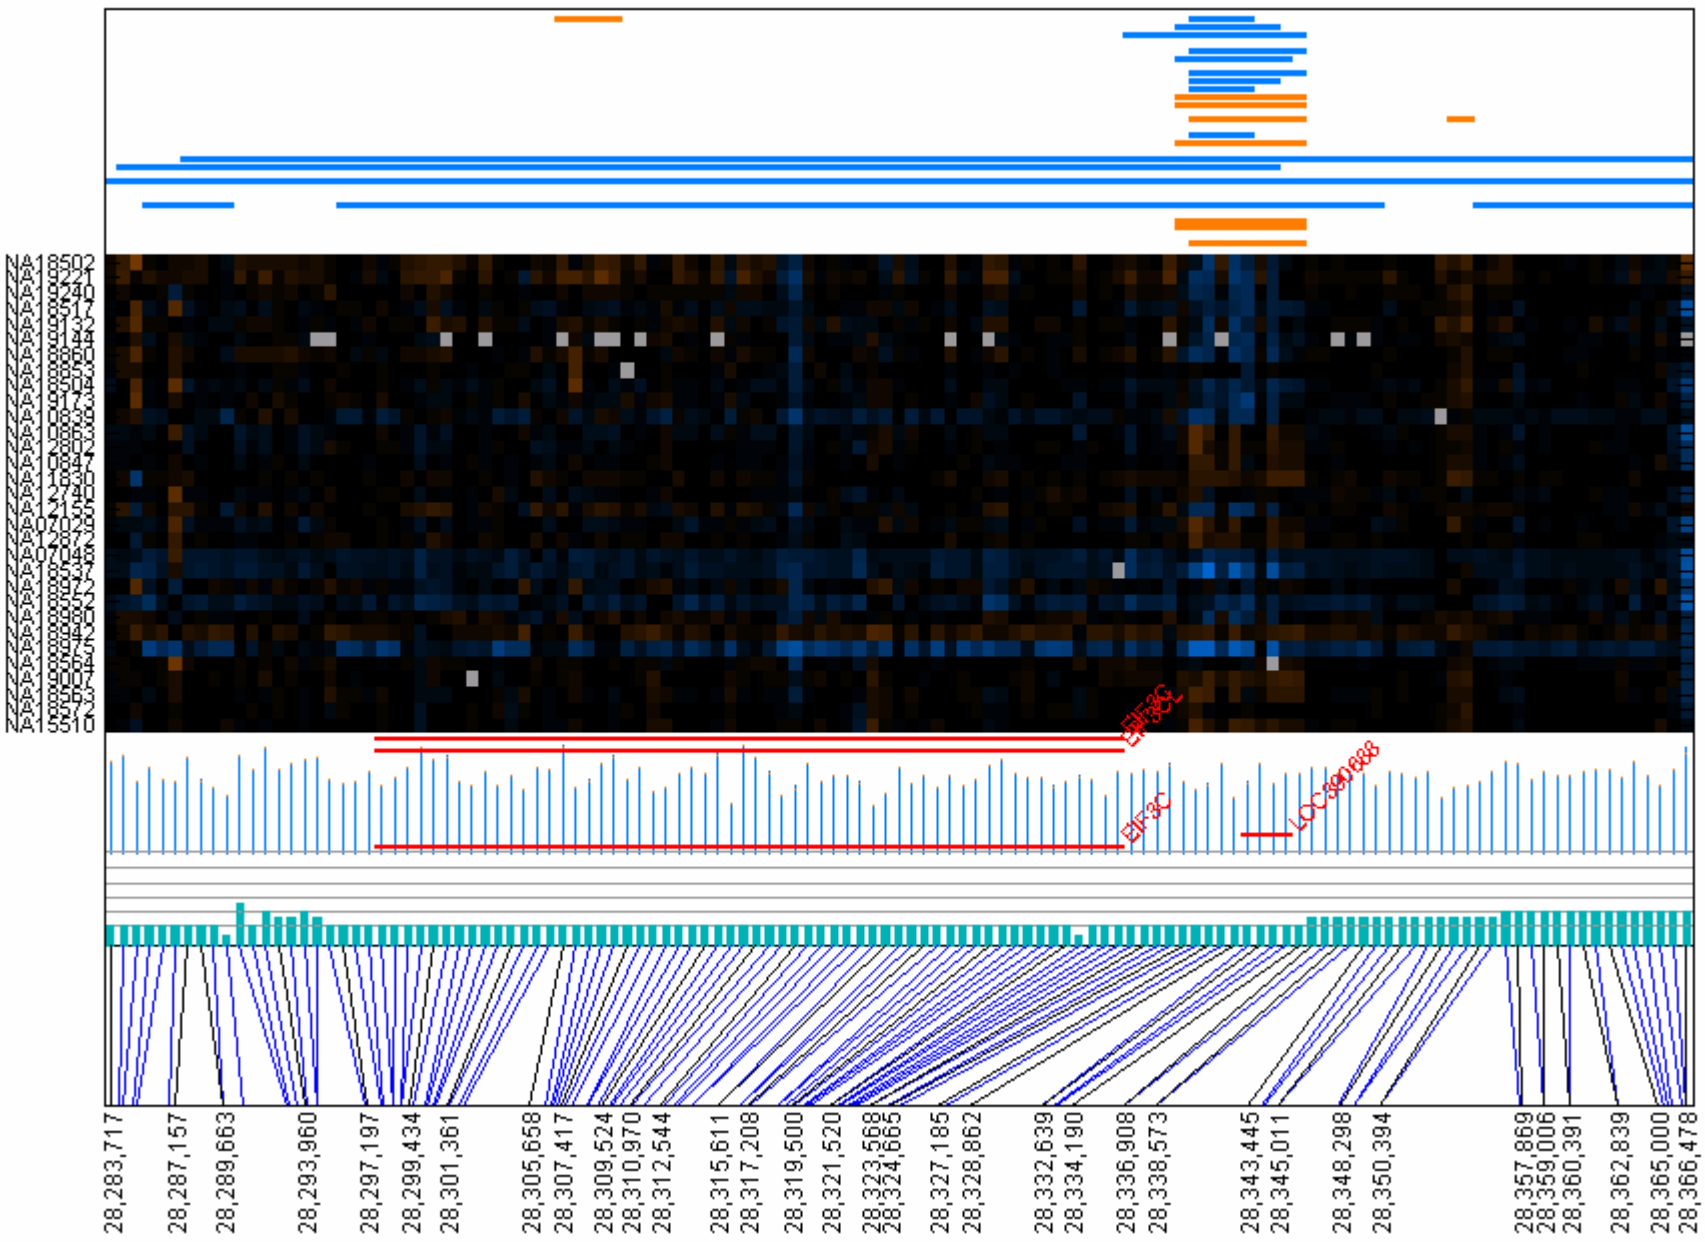

chr16:028507974-028535572

chr16:028507974-028535572

CCDC101  
C16orf127  
C16orf128  
C16orf129  
C16orf130  
C16orf131  
C16orf132  
C16orf133  
C16orf134  
C16orf135  
C16orf136  
C16orf137  
C16orf138  
C16orf139  
C16orf140  
C16orf141  
C16orf142  
C16orf143  
C16orf144  
C16orf145  
C16orf146  
C16orf147  
C16orf148  
C16orf149  
C16orf150  
C16orf151  
C16orf152  
C16orf153  
C16orf154  
C16orf155  
C16orf156  
C16orf157  
C16orf158  
C16orf159  
C16orf160  
C16orf161  
C16orf162  
C16orf163  
C16orf164  
C16orf165  
C16orf166  
C16orf167  
C16orf168  
C16orf169  
C16orf170  
C16orf171  
C16orf172  
C16orf173  
C16orf174  
C16orf175  
C16orf176  
C16orf177  
C16orf178  
C16orf179  
C16orf180  
C16orf181  
C16orf182  
C16orf183  
C16orf184  
C16orf185  
C16orf186  
C16orf187  
C16orf188  
C16orf189  
C16orf190  
C16orf191  
C16orf192  
C16orf193  
C16orf194  
C16orf195  
C16orf196  
C16orf197  
C16orf198  
C16orf199  
C16orf200  
C16orf201  
C16orf202  
C16orf203  
C16orf204  
C16orf205  
C16orf206  
C16orf207  
C16orf208  
C16orf209  
C16orf210  
C16orf211  
C16orf212  
C16orf213  
C16orf214  
C16orf215  
C16orf216  
C16orf217  
C16orf218  
C16orf219  
C16orf220  
C16orf221  
C16orf222  
C16orf223  
C16orf224  
C16orf225  
C16orf226  
C16orf227  
C16orf228  
C16orf229  
C16orf230  
C16orf231  
C16orf232  
C16orf233  
C16orf234  
C16orf235  
C16orf236  
C16orf237  
C16orf238  
C16orf239  
C16orf240  
C16orf241  
C16orf242  
C16orf243  
C16orf244  
C16orf245  
C16orf246  
C16orf247  
C16orf248  
C16orf249  
C16orf250  
C16orf251  
C16orf252  
C16orf253  
C16orf254  
C16orf255  
C16orf256  
C16orf257  
C16orf258  
C16orf259  
C16orf260  
C16orf261  
C16orf262  
C16orf263  
C16orf264  
C16orf265  
C16orf266  
C16orf267  
C16orf268  
C16orf269  
C16orf270  
C16orf271  
C16orf272  
C16orf273  
C16orf274  
C16orf275  
C16orf276  
C16orf277  
C16orf278  
C16orf279  
C16orf280  
C16orf281  
C16orf282  
C16orf283  
C16orf284  
C16orf285  
C16orf286  
C16orf287  
C16orf288  
C16orf289  
C16orf290  
C16orf291  
C16orf292  
C16orf293  
C16orf294  
C16orf295  
C16orf296  
C16orf297  
C16orf298  
C16orf299  
C16orf300  
C16orf301  
C16orf302  
C16orf303  
C16orf304  
C16orf305  
C16orf306  
C16orf307  
C16orf308  
C16orf309  
C16orf310  
C16orf311  
C16orf312  
C16orf313  
C16orf314  
C16orf315  
C16orf316  
C16orf317  
C16orf318  
C16orf319  
C16orf320  
C16orf321  
C16orf322  
C16orf323  
C16orf324  
C16orf325  
C16orf326  
C16orf327  
C16orf328  
C16orf329  
C16orf330  
C16orf331  
C16orf332  
C16orf333  
C16orf334  
C16orf335  
C16orf336  
C16orf337  
C16orf338  
C16orf339  
C16orf340  
C16orf341  
C16orf342  
C16orf343  
C16orf344  
C16orf345  
C16orf346  
C16orf347  
C16orf348  
C16orf349  
C16orf350  
C16orf351  
C16orf352  
C16orf353  
C16orf354  
C16orf355  
C16orf356  
C16orf357  
C16orf358  
C16orf359  
C16orf360  
C16orf361  
C16orf362  
C16orf363  
C16orf364  
C16orf365  
C16orf366  
C16orf367  
C16orf368  
C16orf369  
C16orf370  
C16orf371  
C16orf372  
C16orf373  
C16orf374  
C16orf375  
C16orf376  
C16orf377  
C16orf378  
C16orf379  
C16orf380  
C16orf381  
C16orf382  
C16orf383  
C16orf384  
C16orf385  
C16orf386  
C16orf387  
C16orf388  
C16orf389  
C16orf390  
C16orf391  
C16orf392  
C16orf393  
C16orf394  
C16orf395  
C16orf396  
C16orf397  
C16orf398  
C16orf399  
C16orf400  
C16orf401  
C16orf402  
C16orf403  
C16orf404  
C16orf405  
C16orf406  
C16orf407  
C16orf408  
C16orf409  
C16orf410  
C16orf411  
C16orf412  
C16orf413  
C16orf414  
C16orf415  
C16orf416  
C16orf417  
C16orf418  
C16orf419  
C16orf420  
C16orf421  
C16orf422  
C16orf423  
C16orf424  
C16orf425  
C16orf426  
C16orf427  
C16orf428  
C16orf429  
C16orf430  
C16orf431  
C16orf432  
C16orf433  
C16orf434  
C16orf435  
C16orf436  
C16orf437  
C16orf438  
C16orf439  
C16orf440  
C16orf441  
C16orf442  
C16orf443  
C16orf444  
C16orf445  
C16orf446  
C16orf447  
C16orf448  
C16orf449  
C16orf450  
C16orf451  
C16orf452  
C16orf453  
C16orf454  
C16orf455  
C16orf456  
C16orf457  
C16orf458  
C16orf459  
C16orf460  
C16orf461  
C16orf462  
C16orf463  
C16orf464  
C16orf465  
C16orf466  
C16orf467  
C16orf468  
C16orf469  
C16orf470  
C16orf471  
C16orf472  
C16orf473  
C16orf474  
C16orf475  
C16orf476  
C16orf477  
C16orf478  
C16orf479  
C16orf480  
C16orf481  
C16orf482  
C16orf483  
C16orf484  
C16orf485  
C16orf486  
C16orf487  
C16orf488  
C16orf489  
C16orf490  
C16orf491  
C16orf492  
C16orf493  
C16orf494  
C16orf495  
C16orf496  
C16orf497  
C16orf498  
C16orf499  
C16orf500

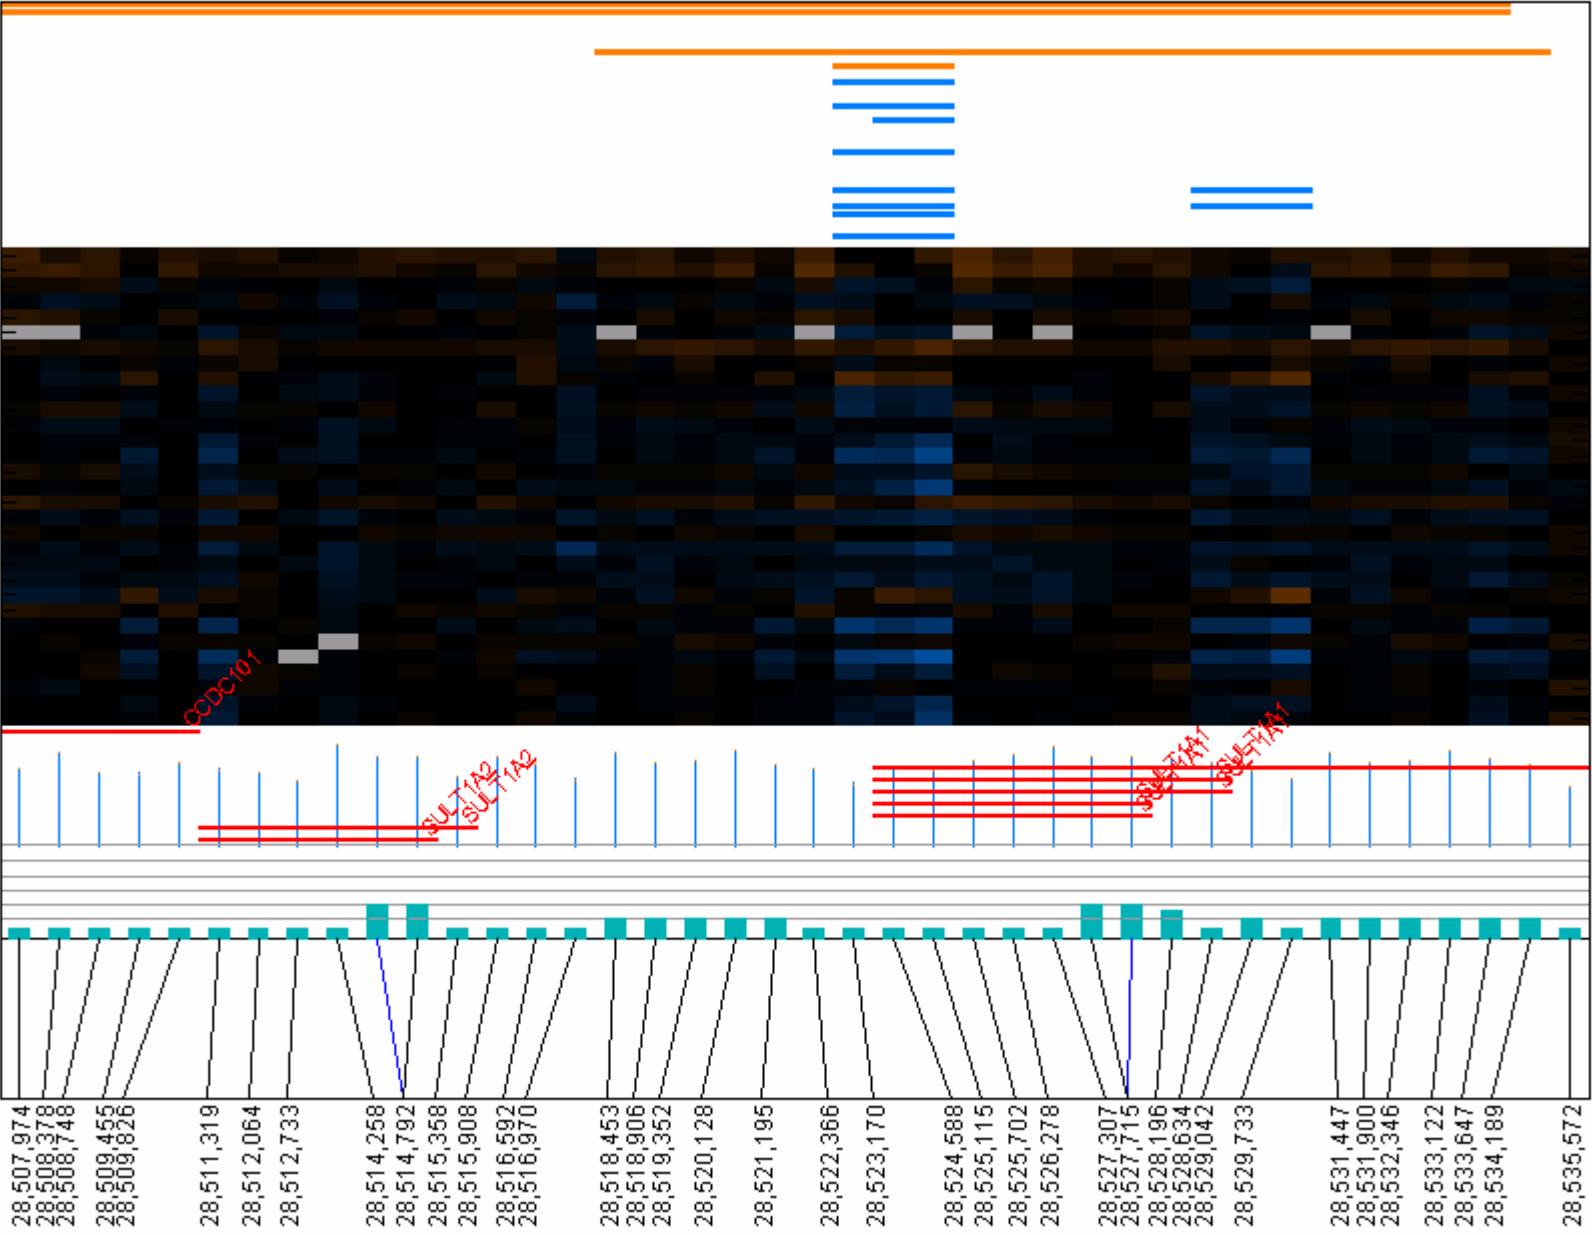



# chr16:028607597-028669220

chr16:028607597-028669220

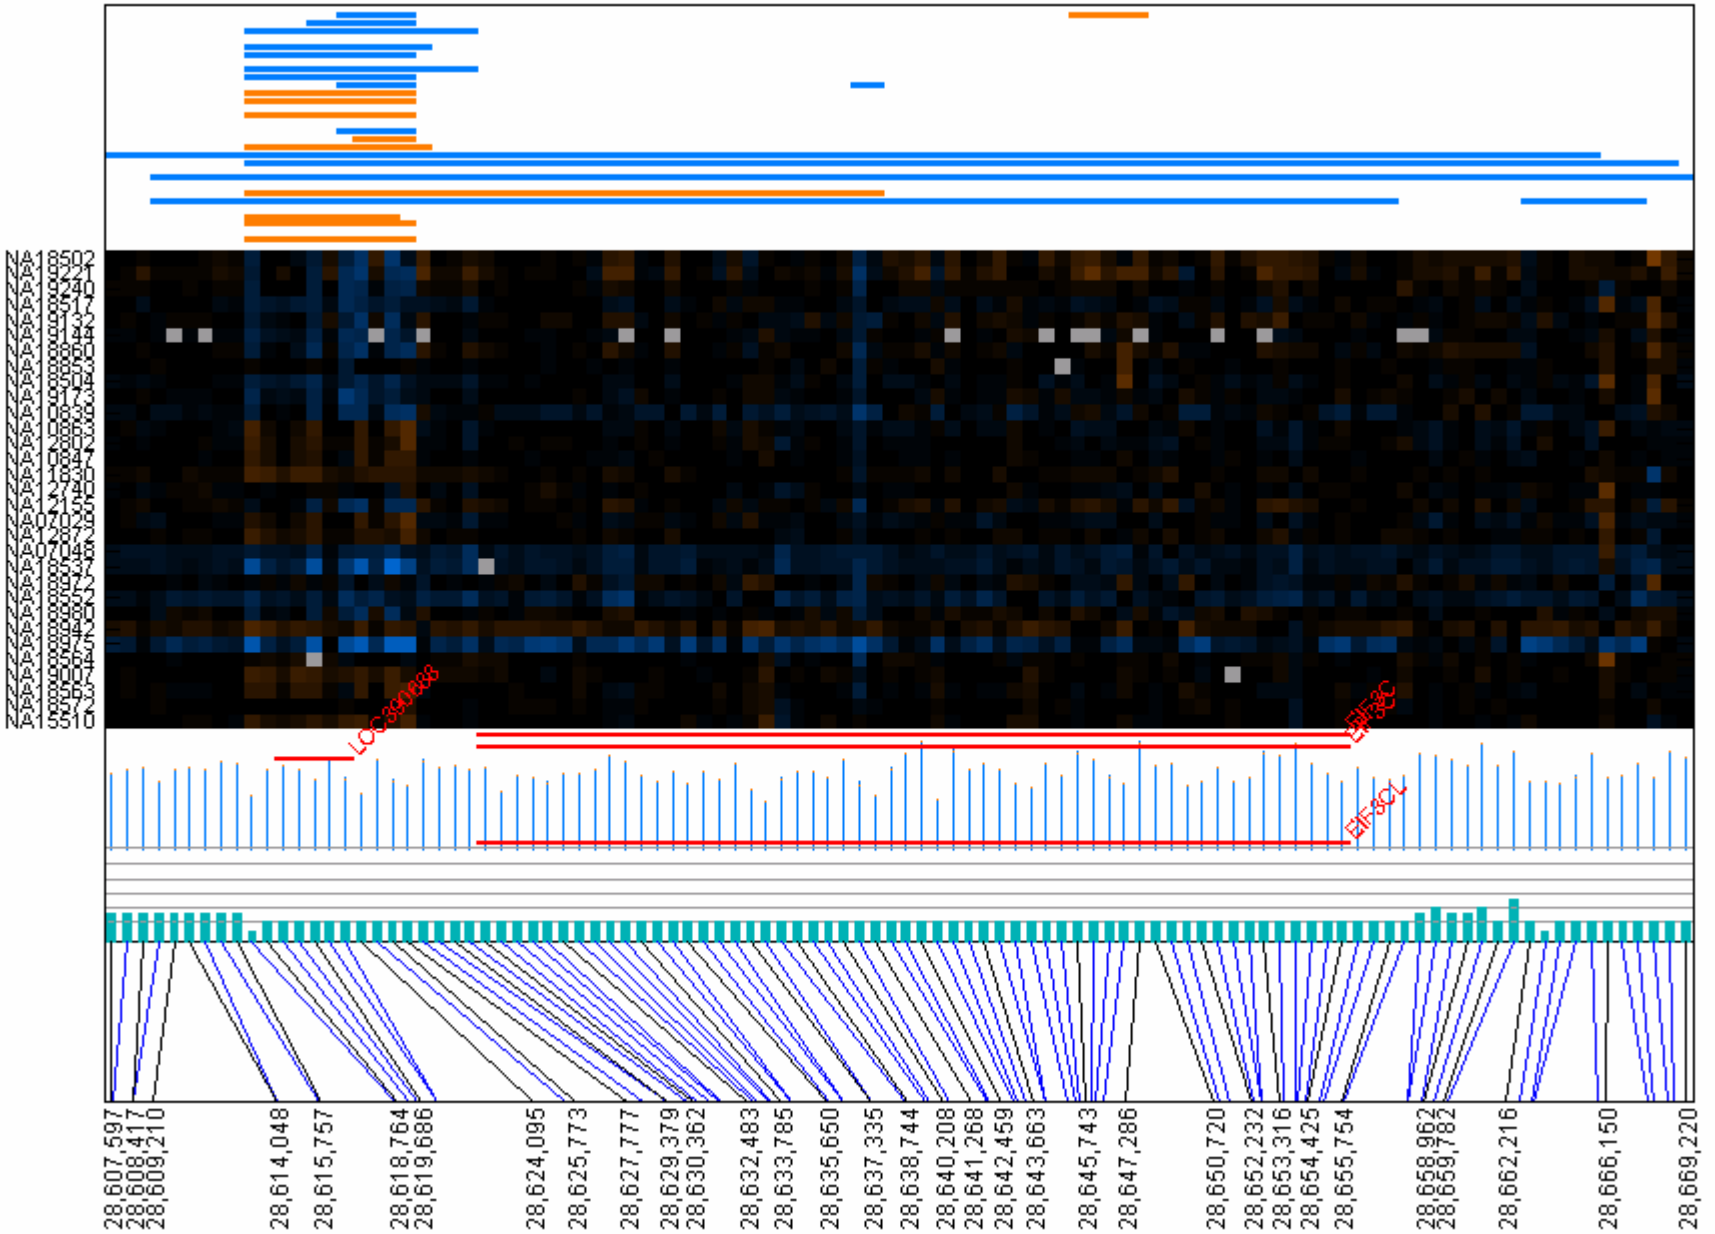

# chr16:031869136-033725243

chr16:031869136-033725243

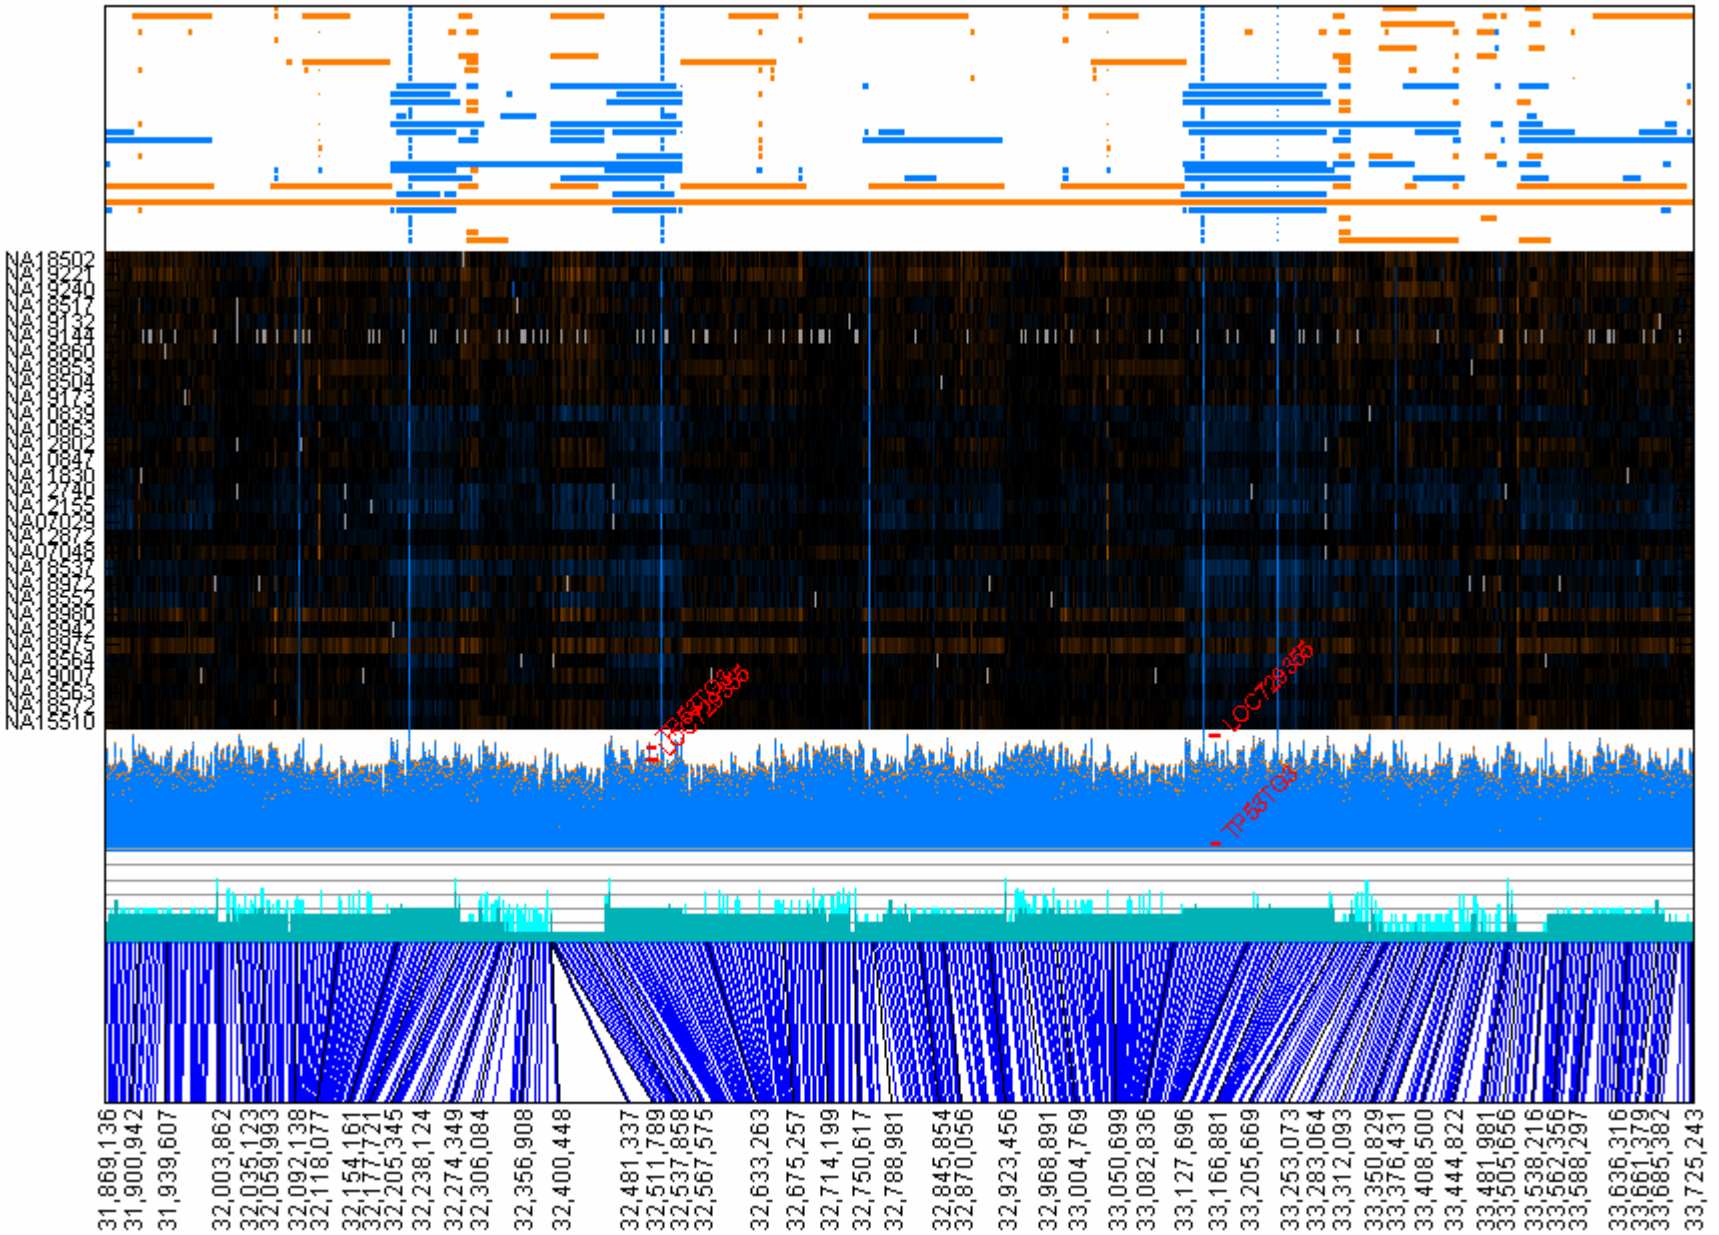

# chr16:070643022-070669810

chr16:070643022-070669810

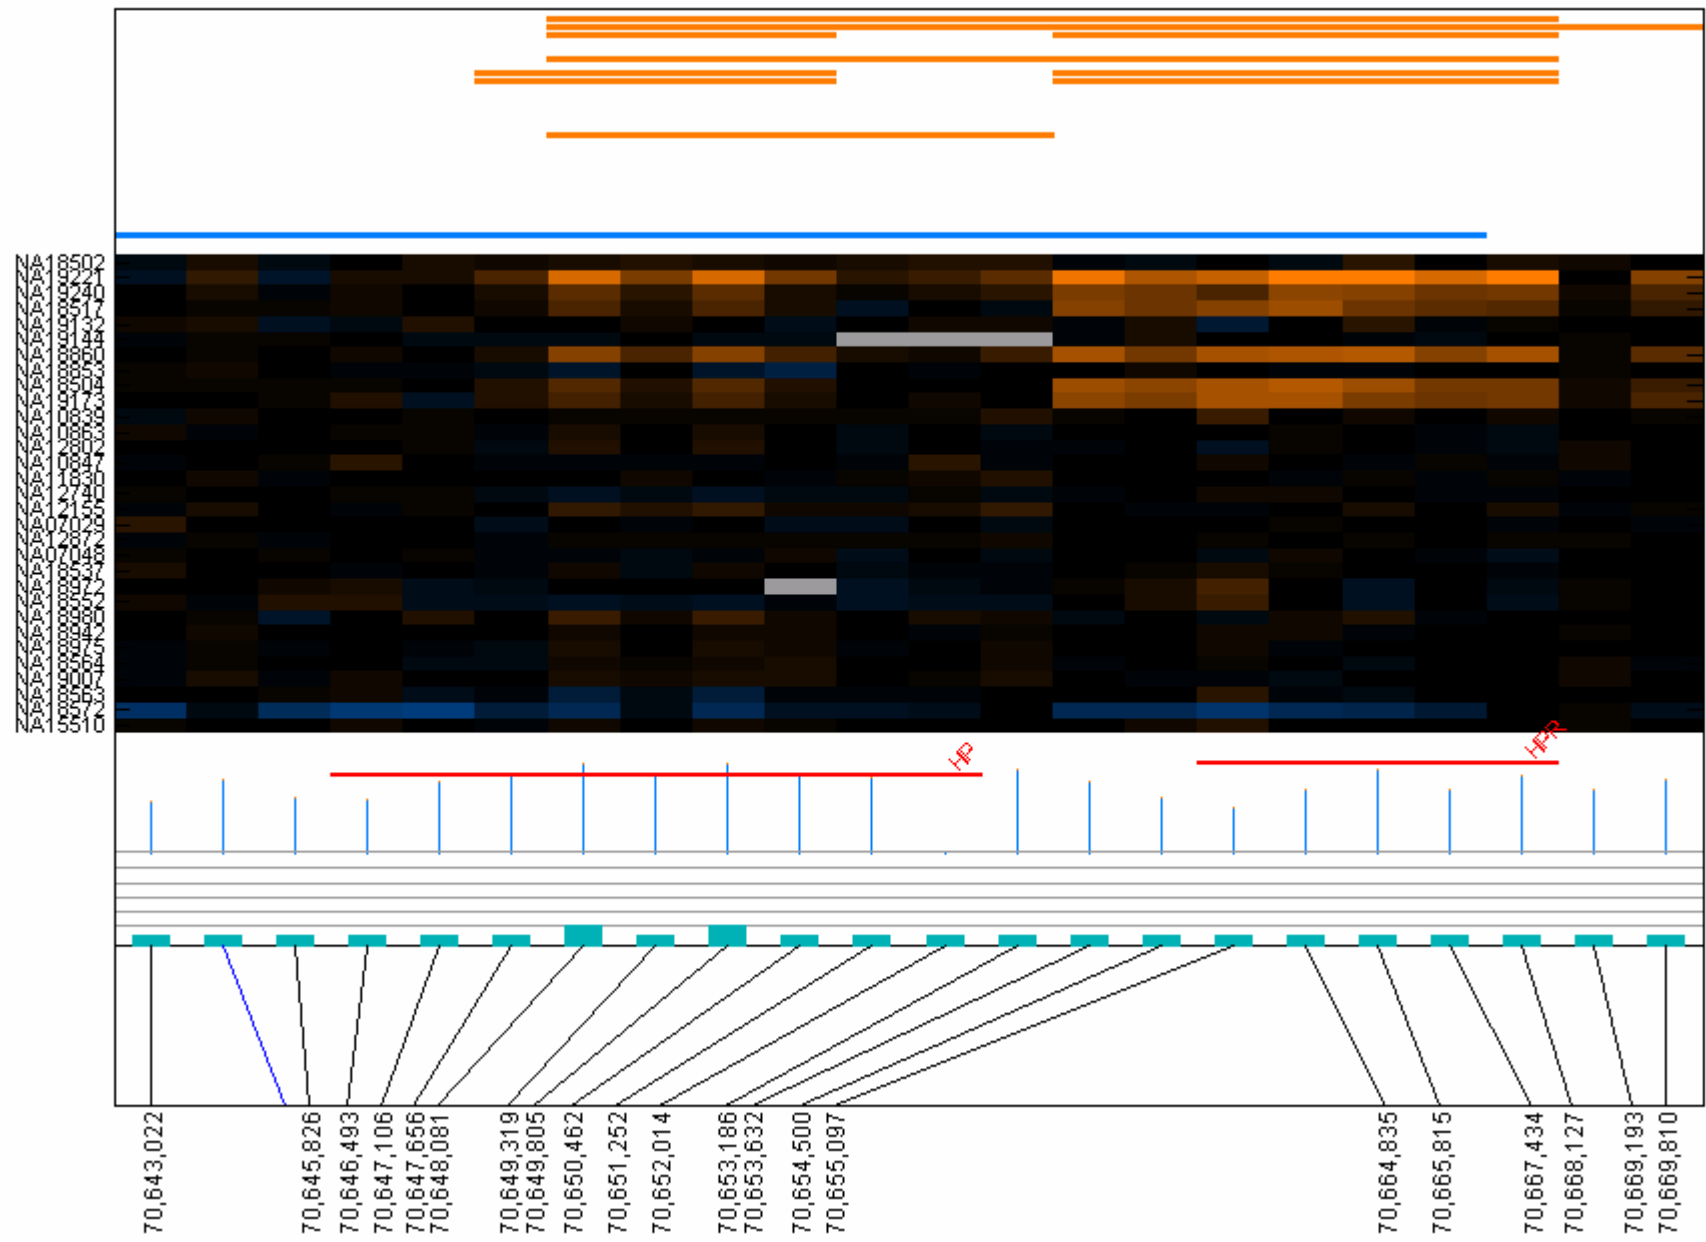

# chr17:018297765-018345958

chr17:018297765-018345958

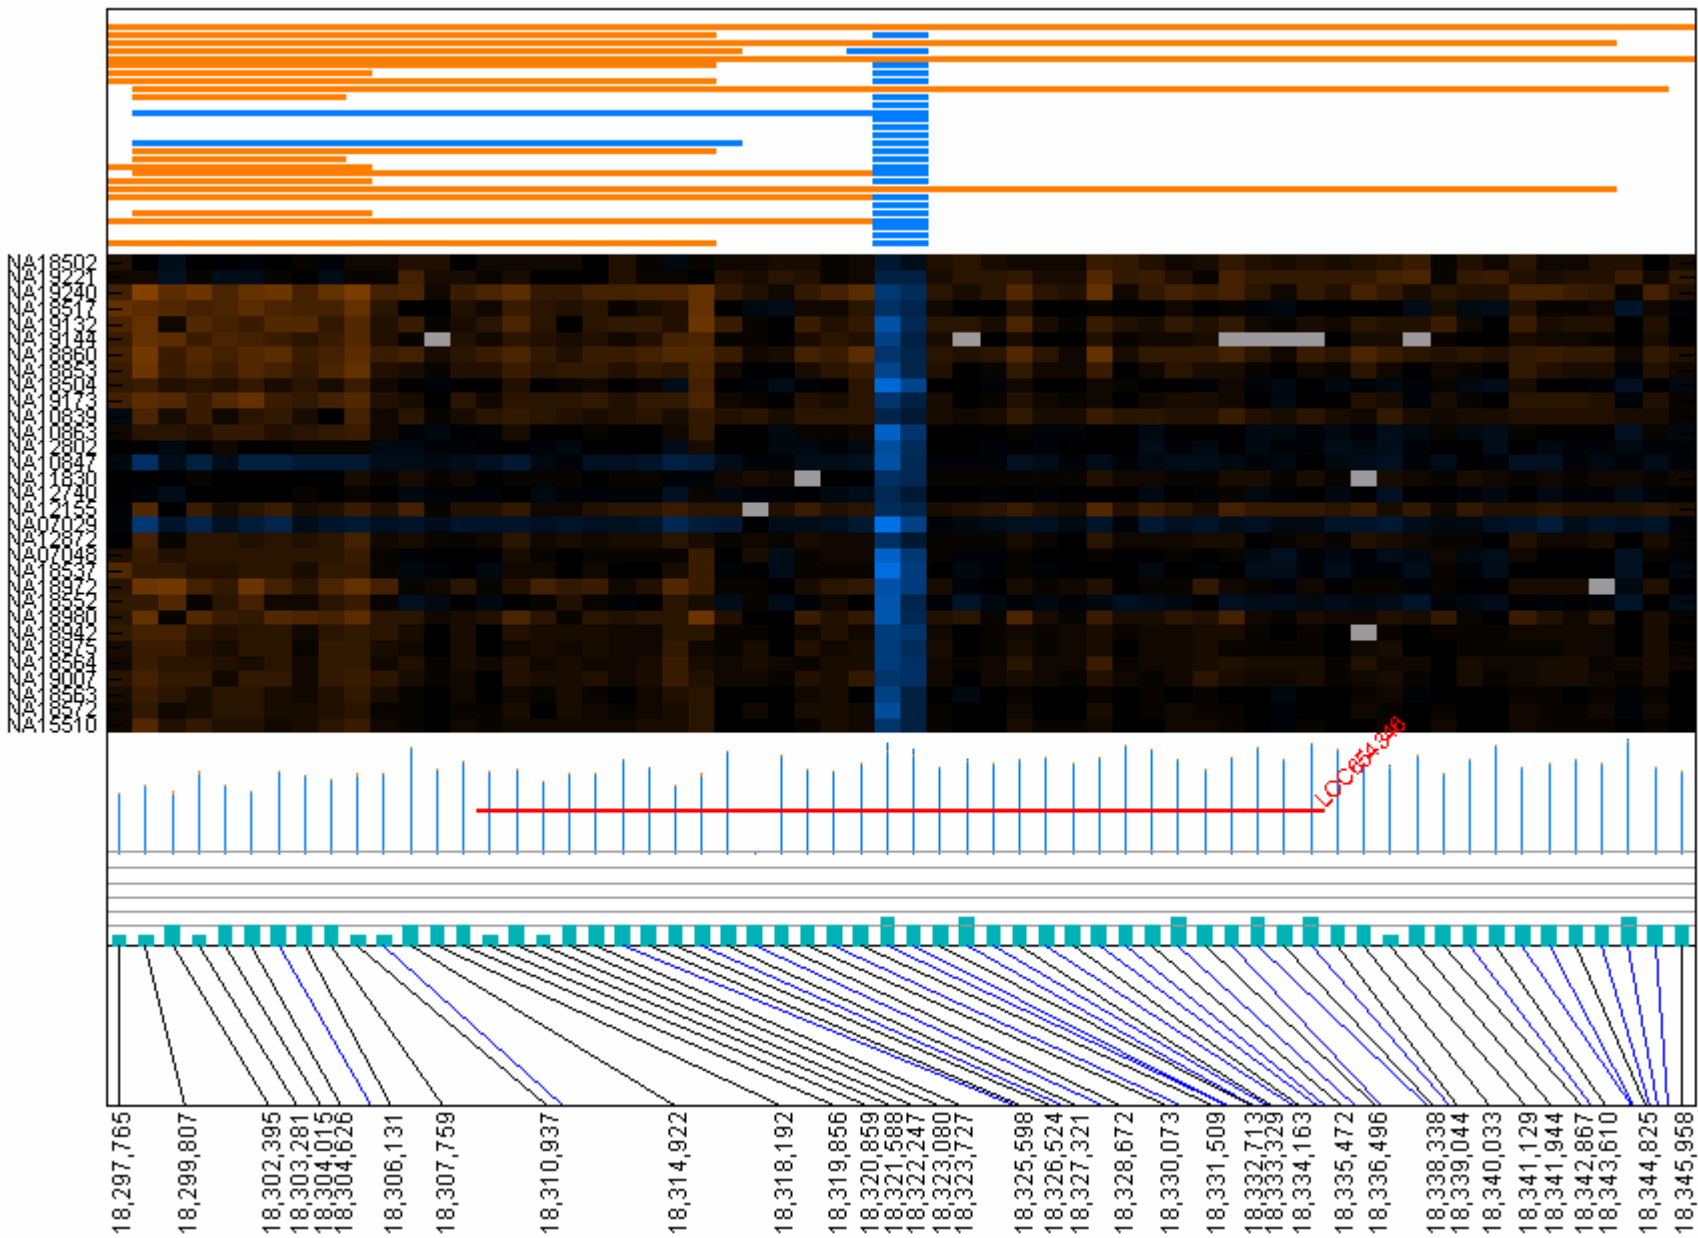

# chr17:018846925-019081776

chr17:018846925-019081776

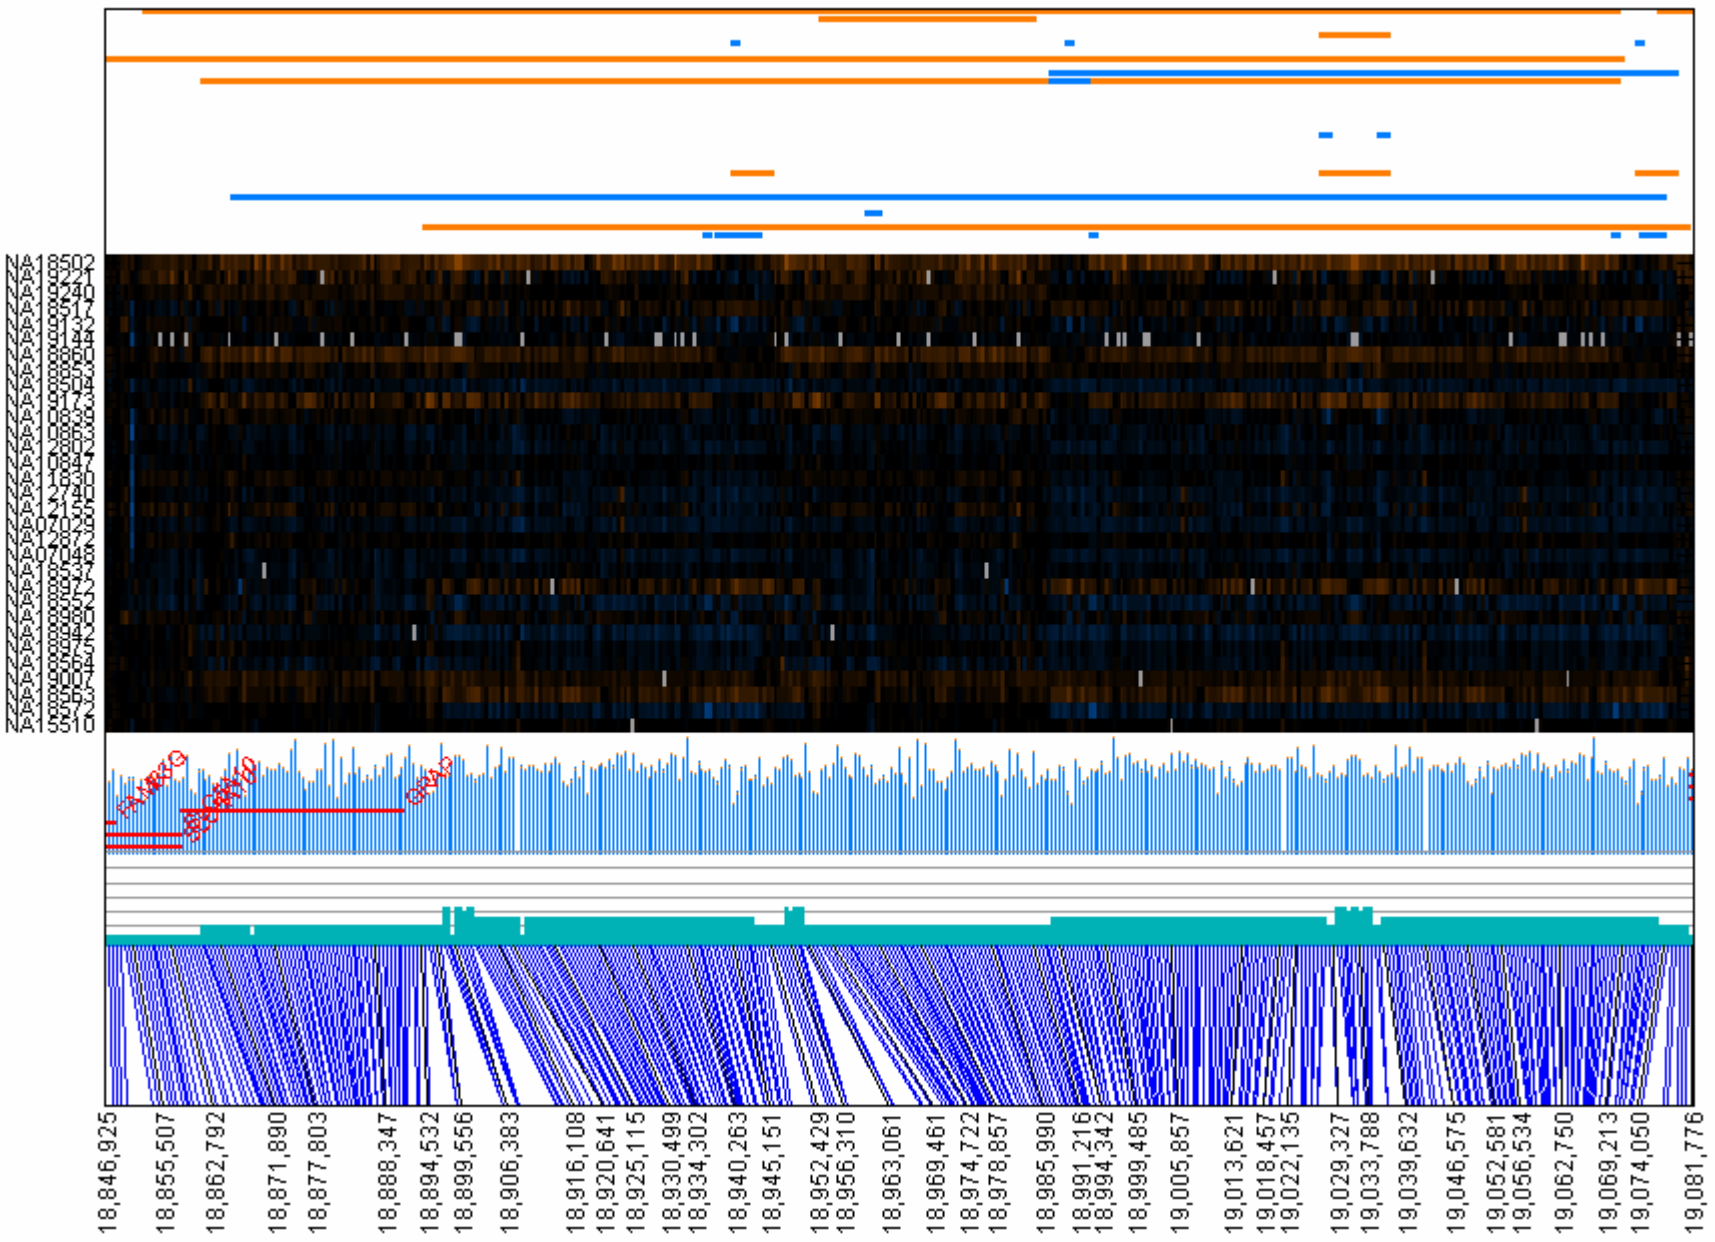

# chr17:020286294-020371041

chr17:020286294-020371041

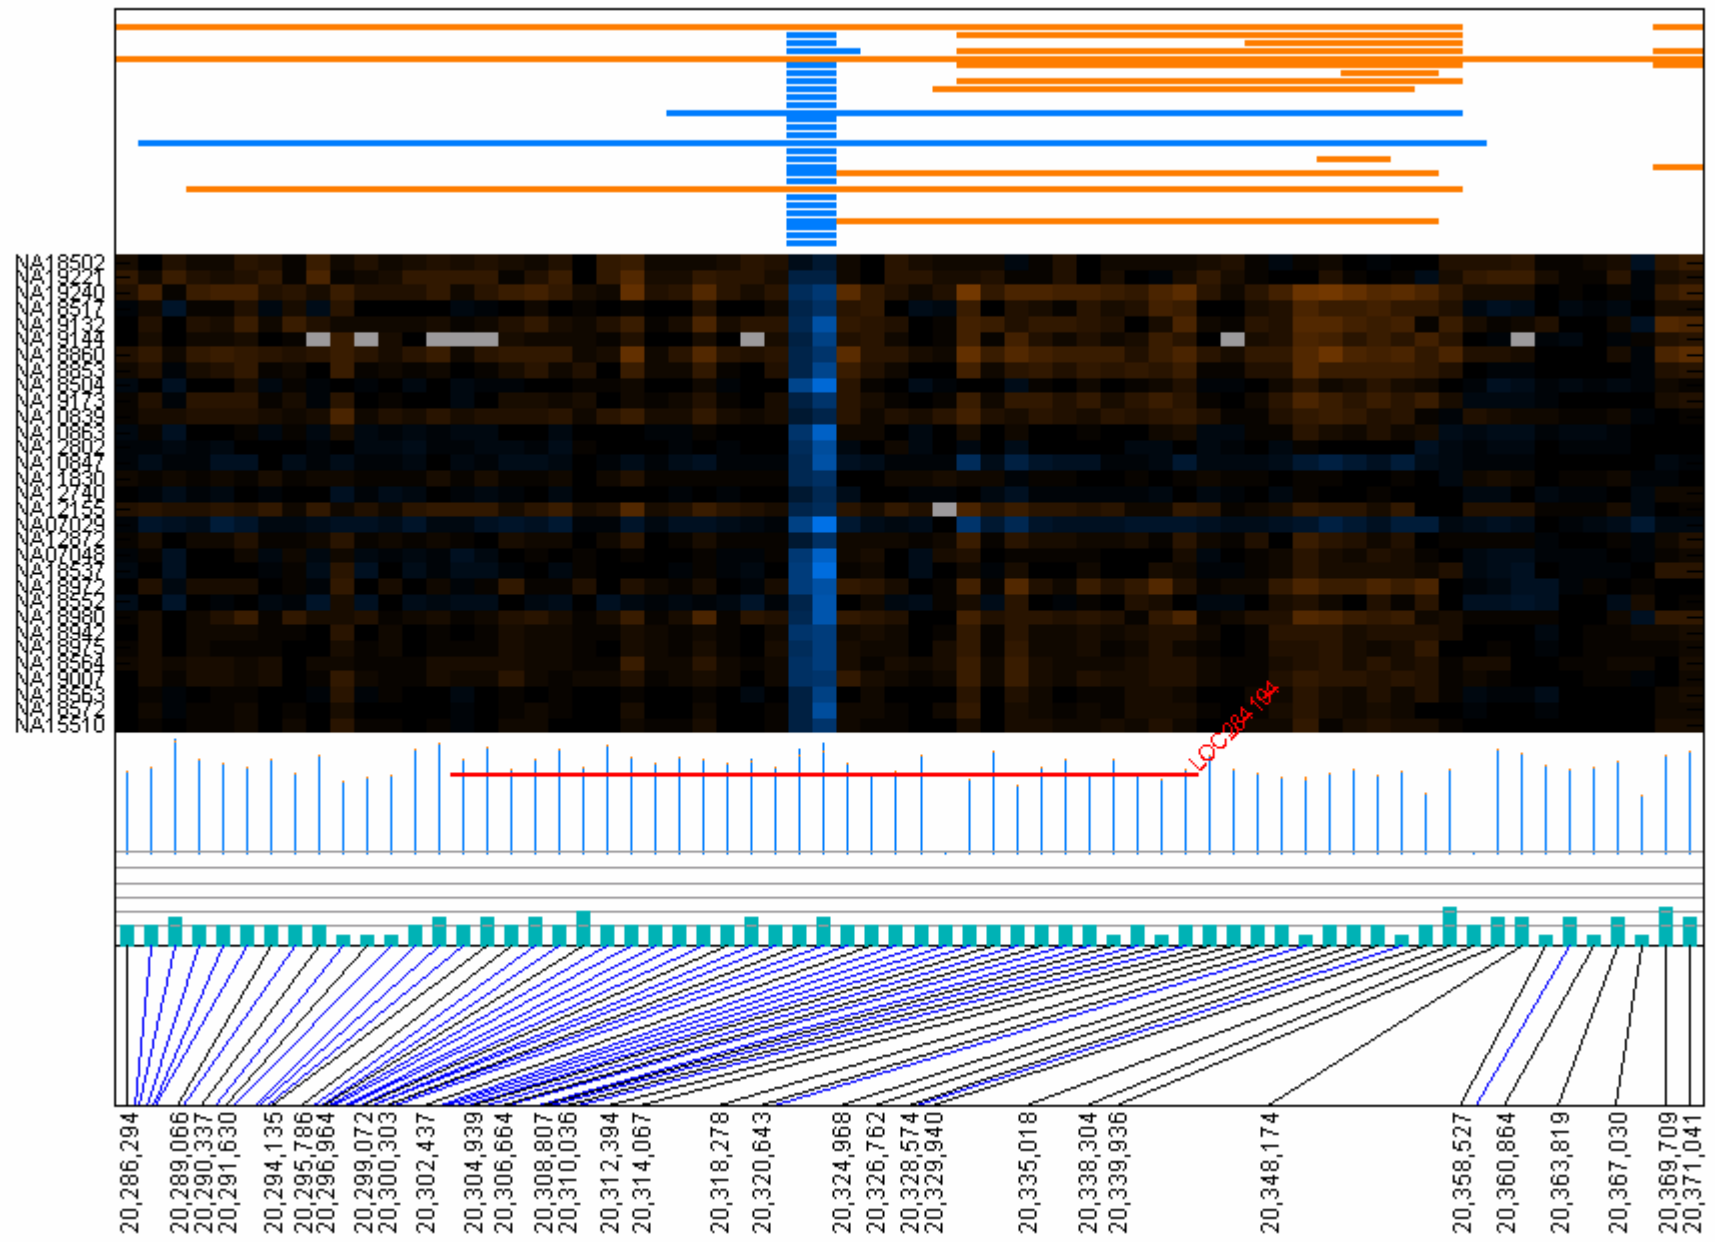

# chr17:031429658-031894953

chr17:031429658-031894953

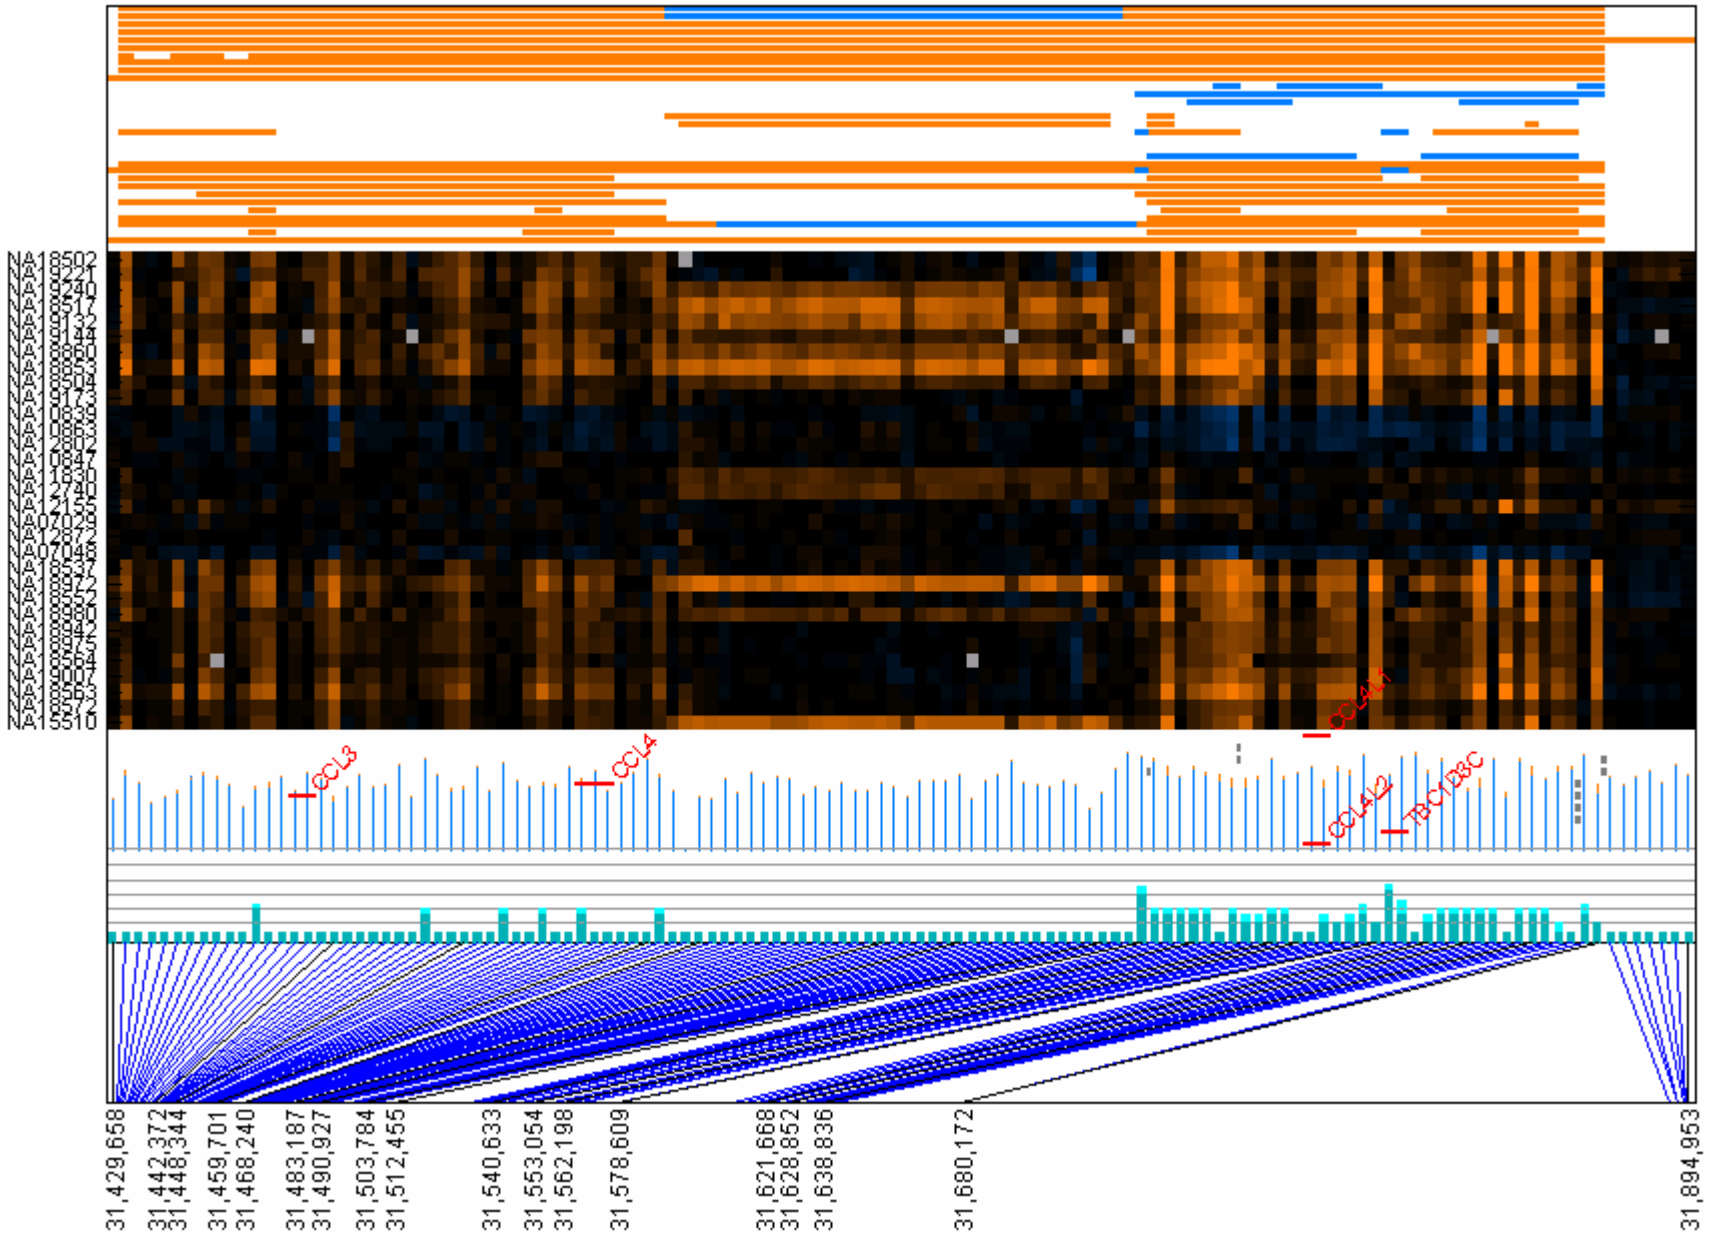

# chr17:033326164-033660590

chr17:033326164-033660590

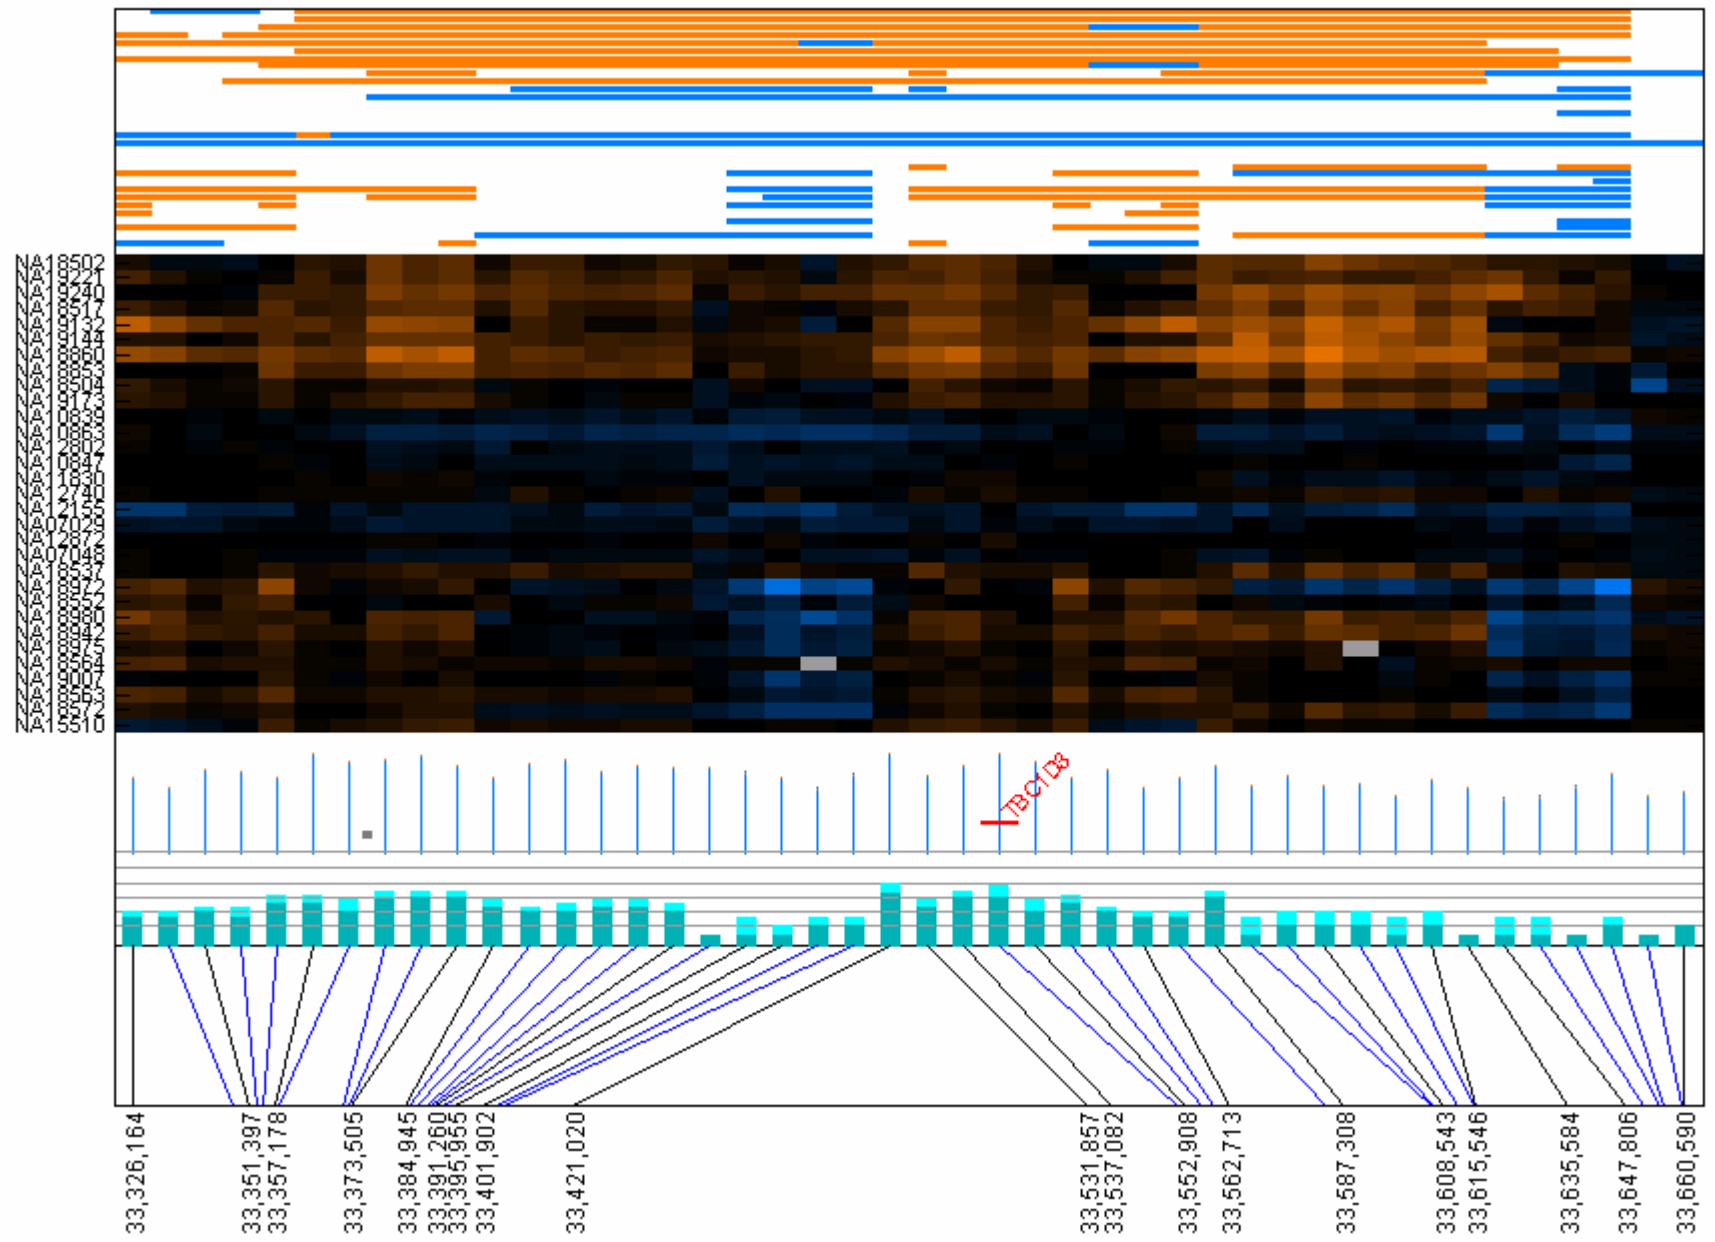



# chr17:040928640-041058251

chr17:040928640-041058251

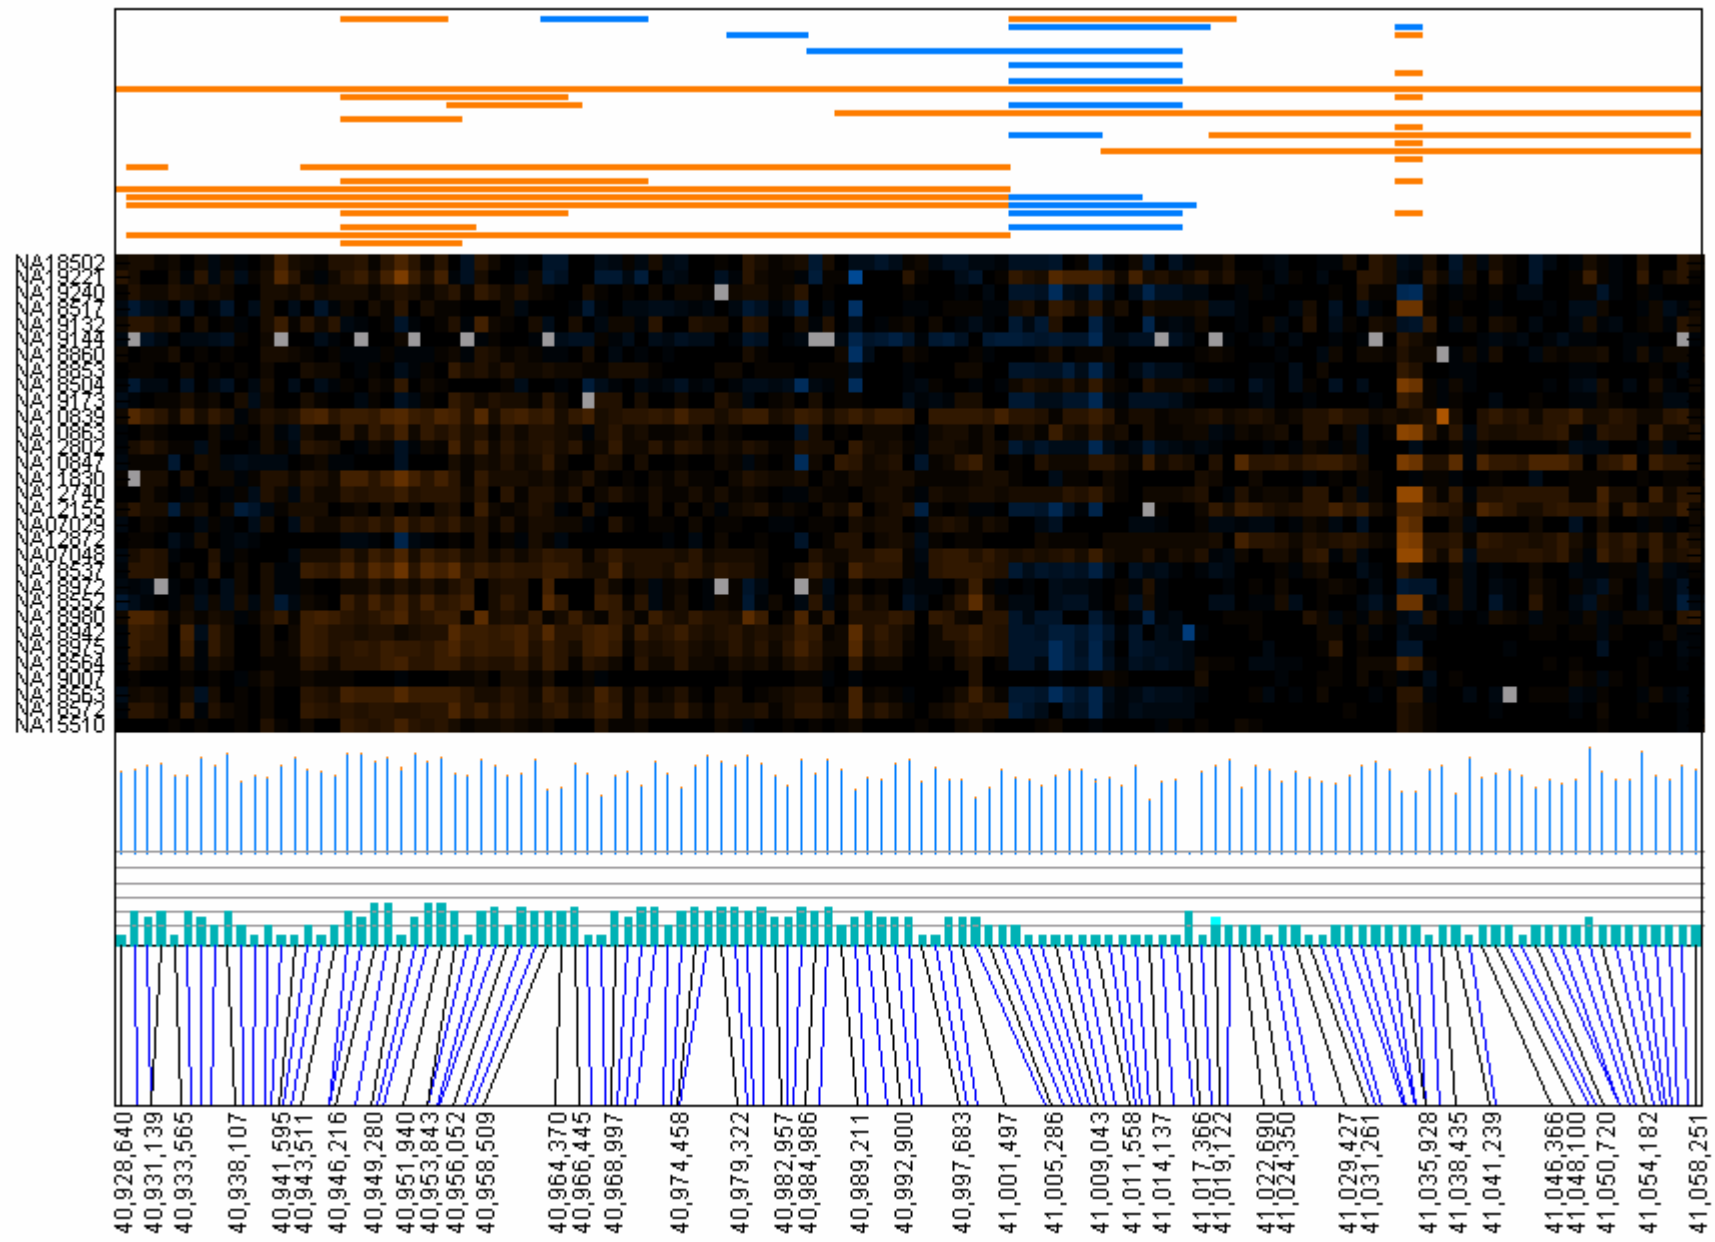

# chr17:041521572-042141946

chr17:041521572-042141946

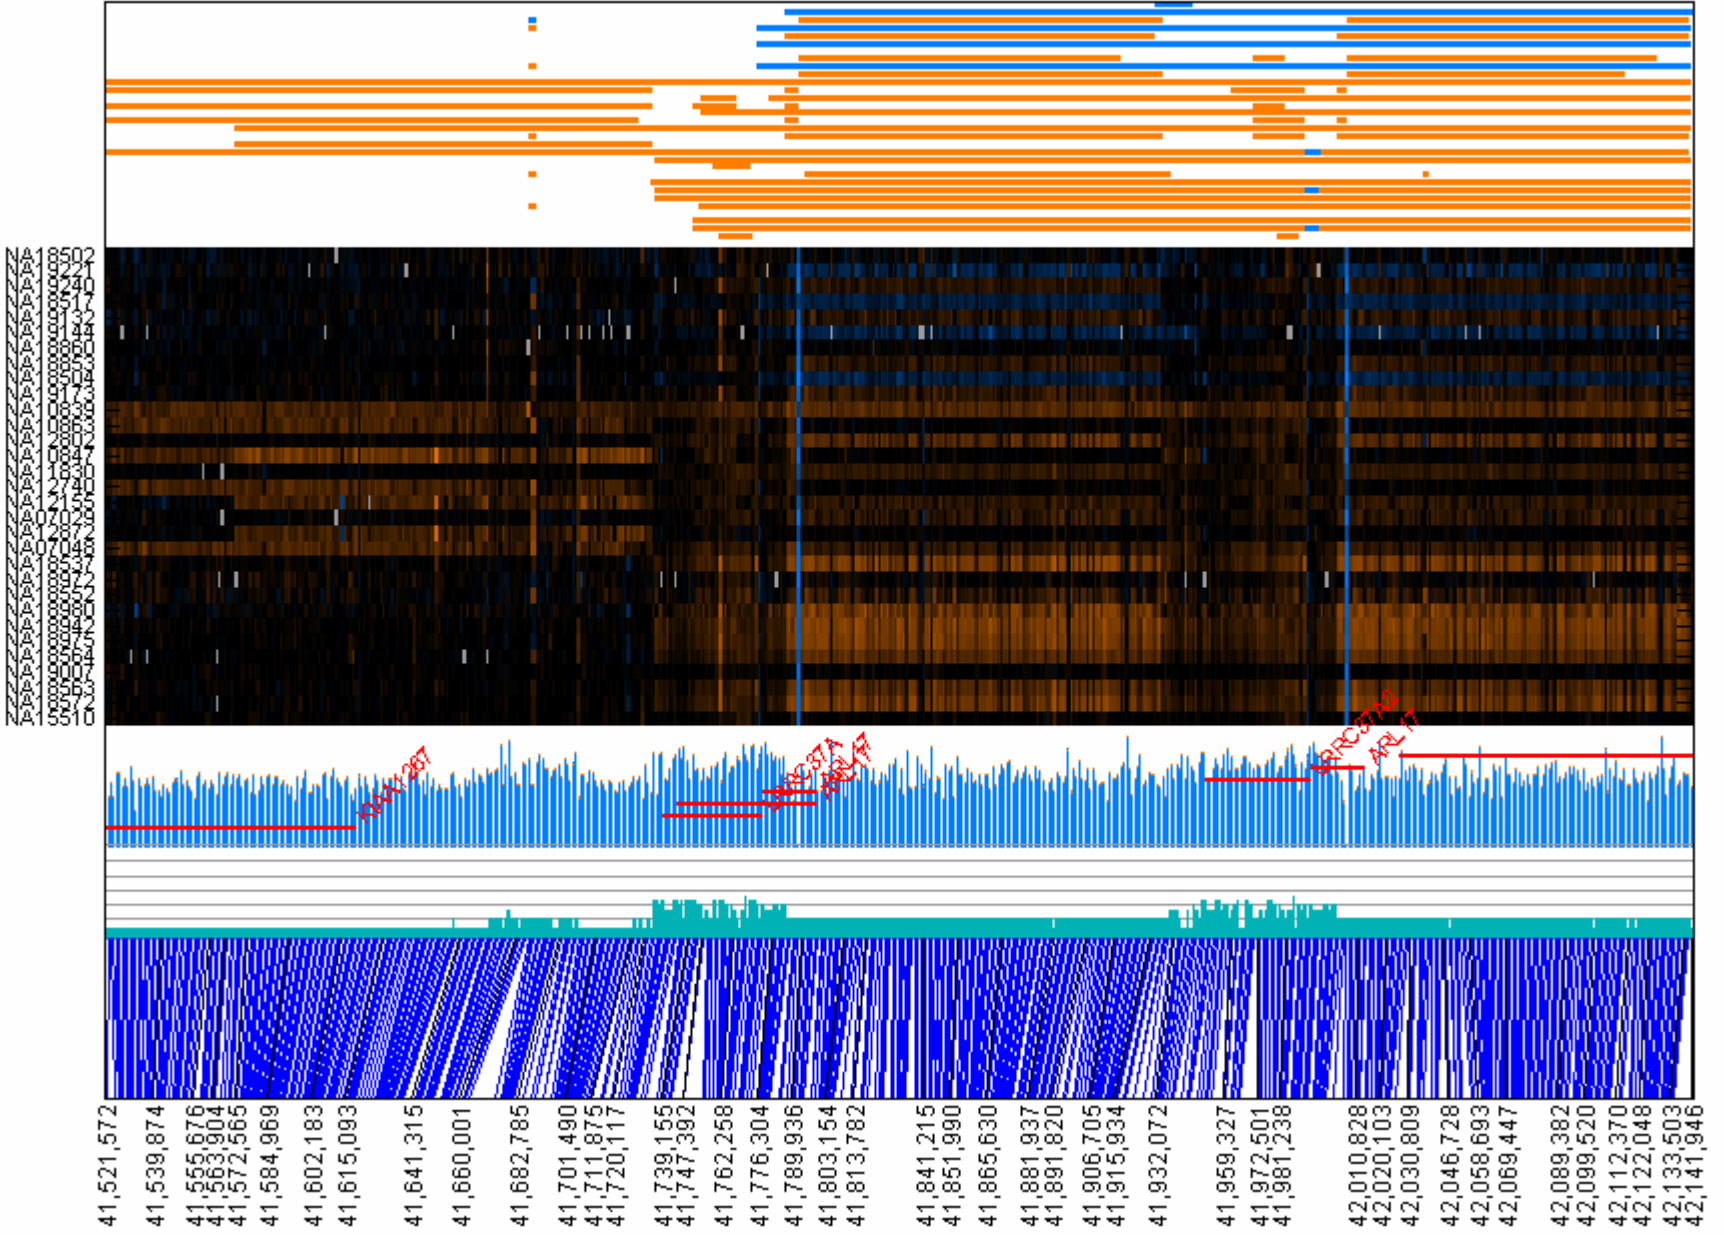

# chr17:042970185-043025568

chr17:042970185-043025568

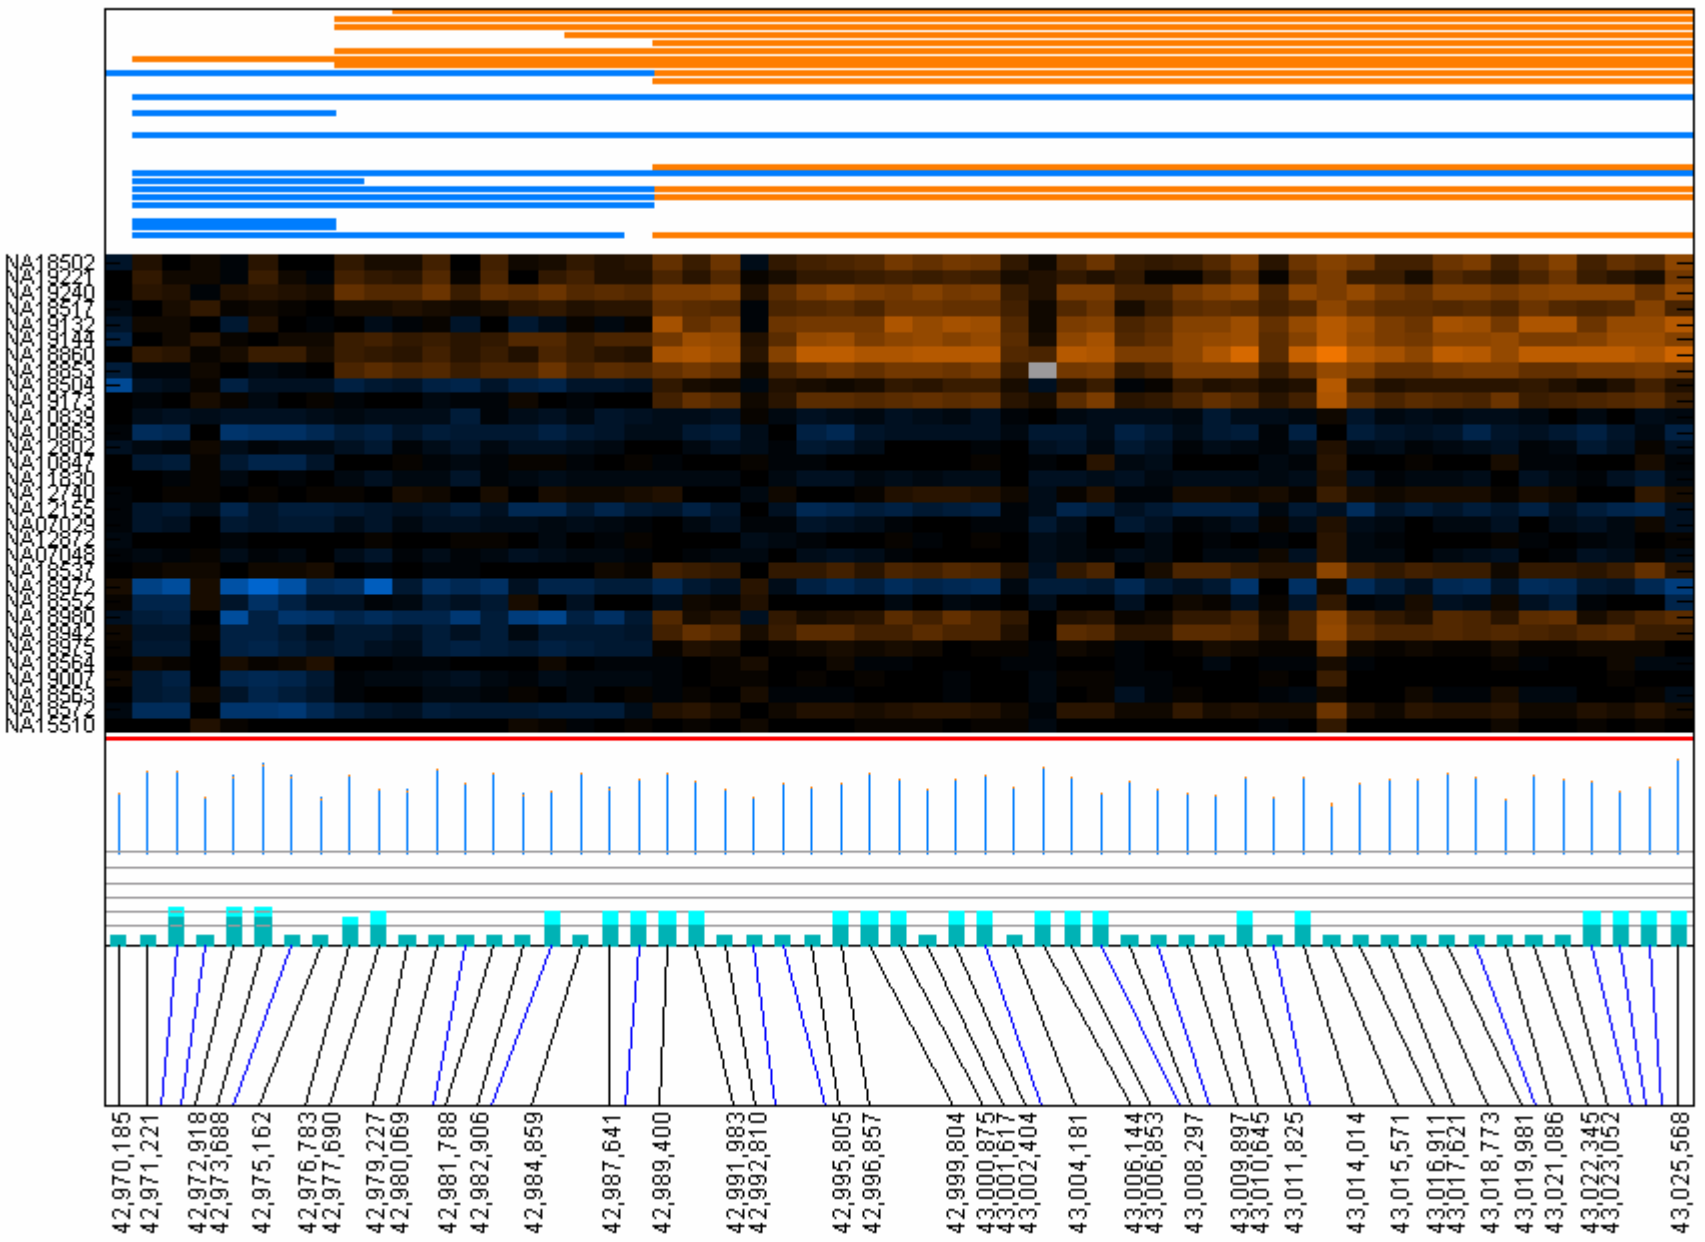

# chr17:060269648-060360559

chr17:060269648-060360559

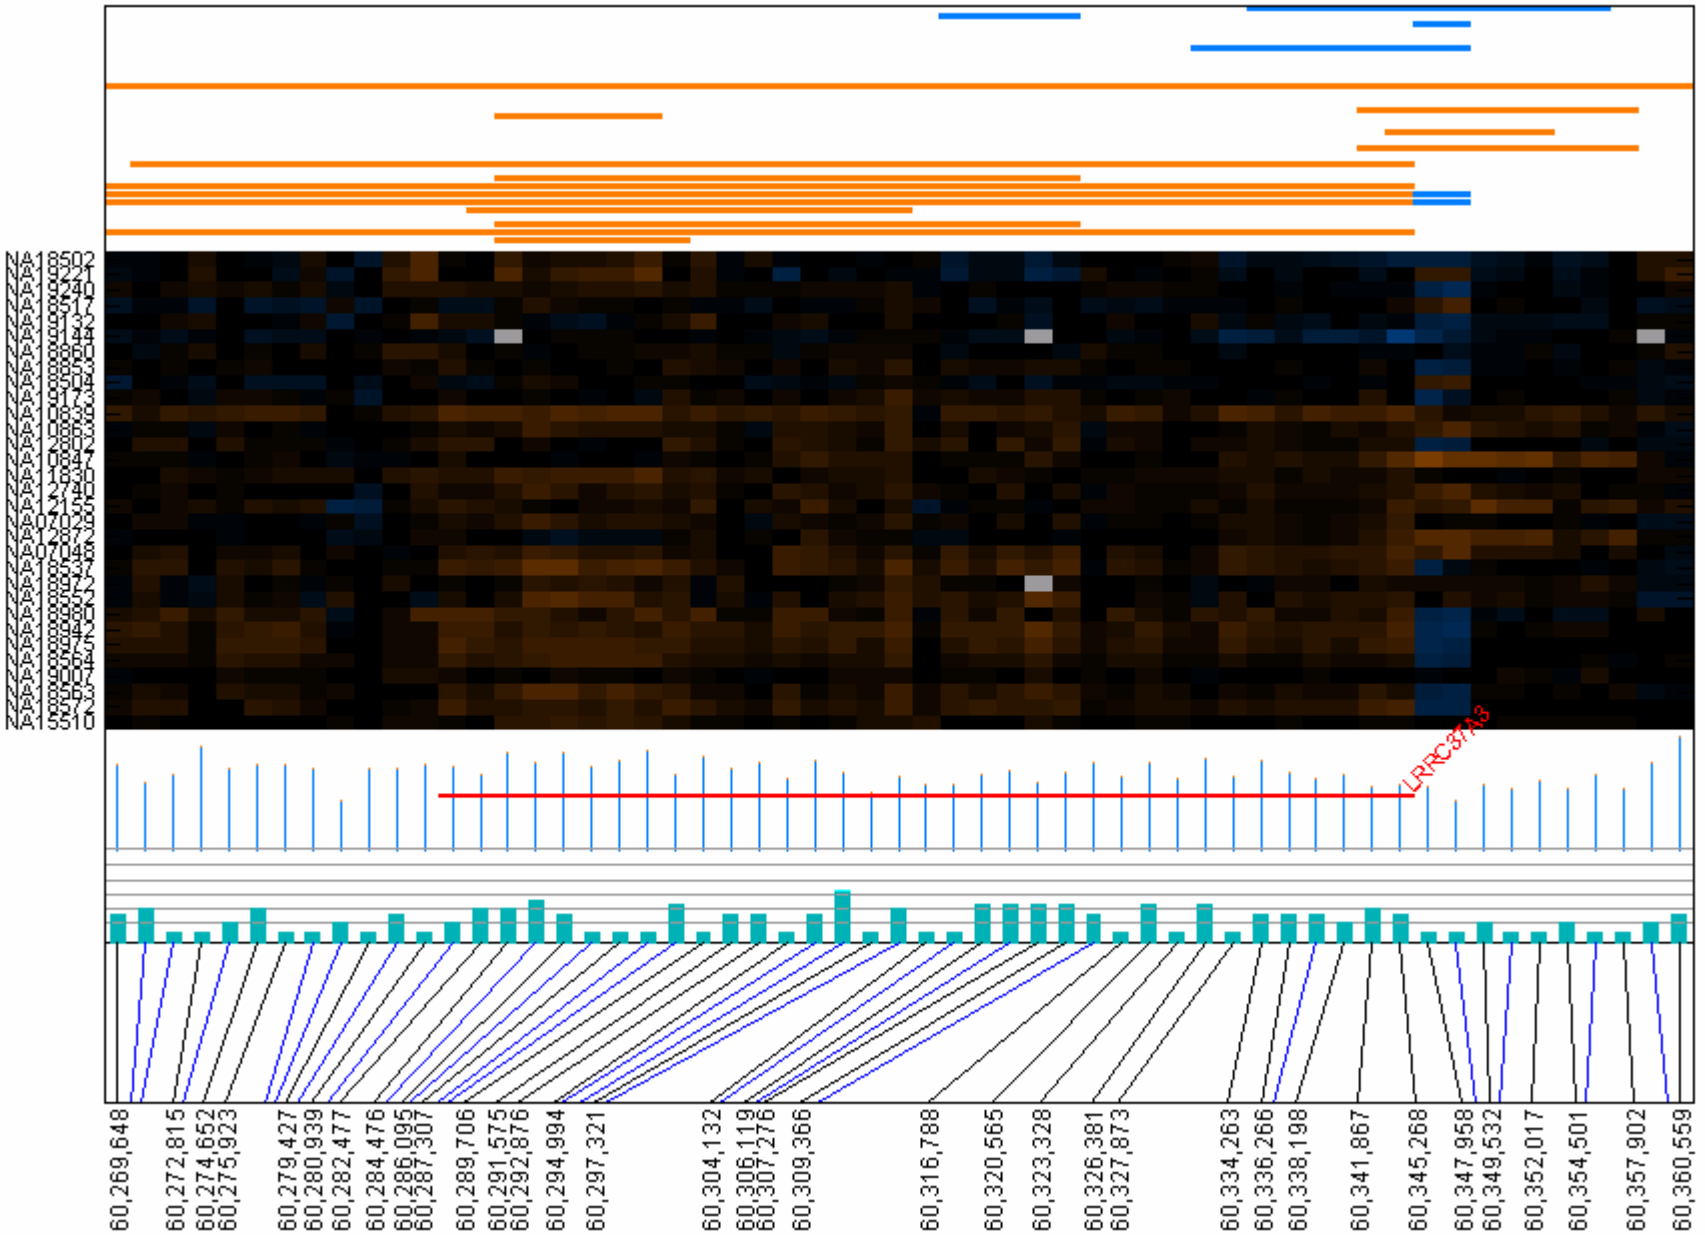

# chr18:014432131-014598736

chr18:014432131-014598736

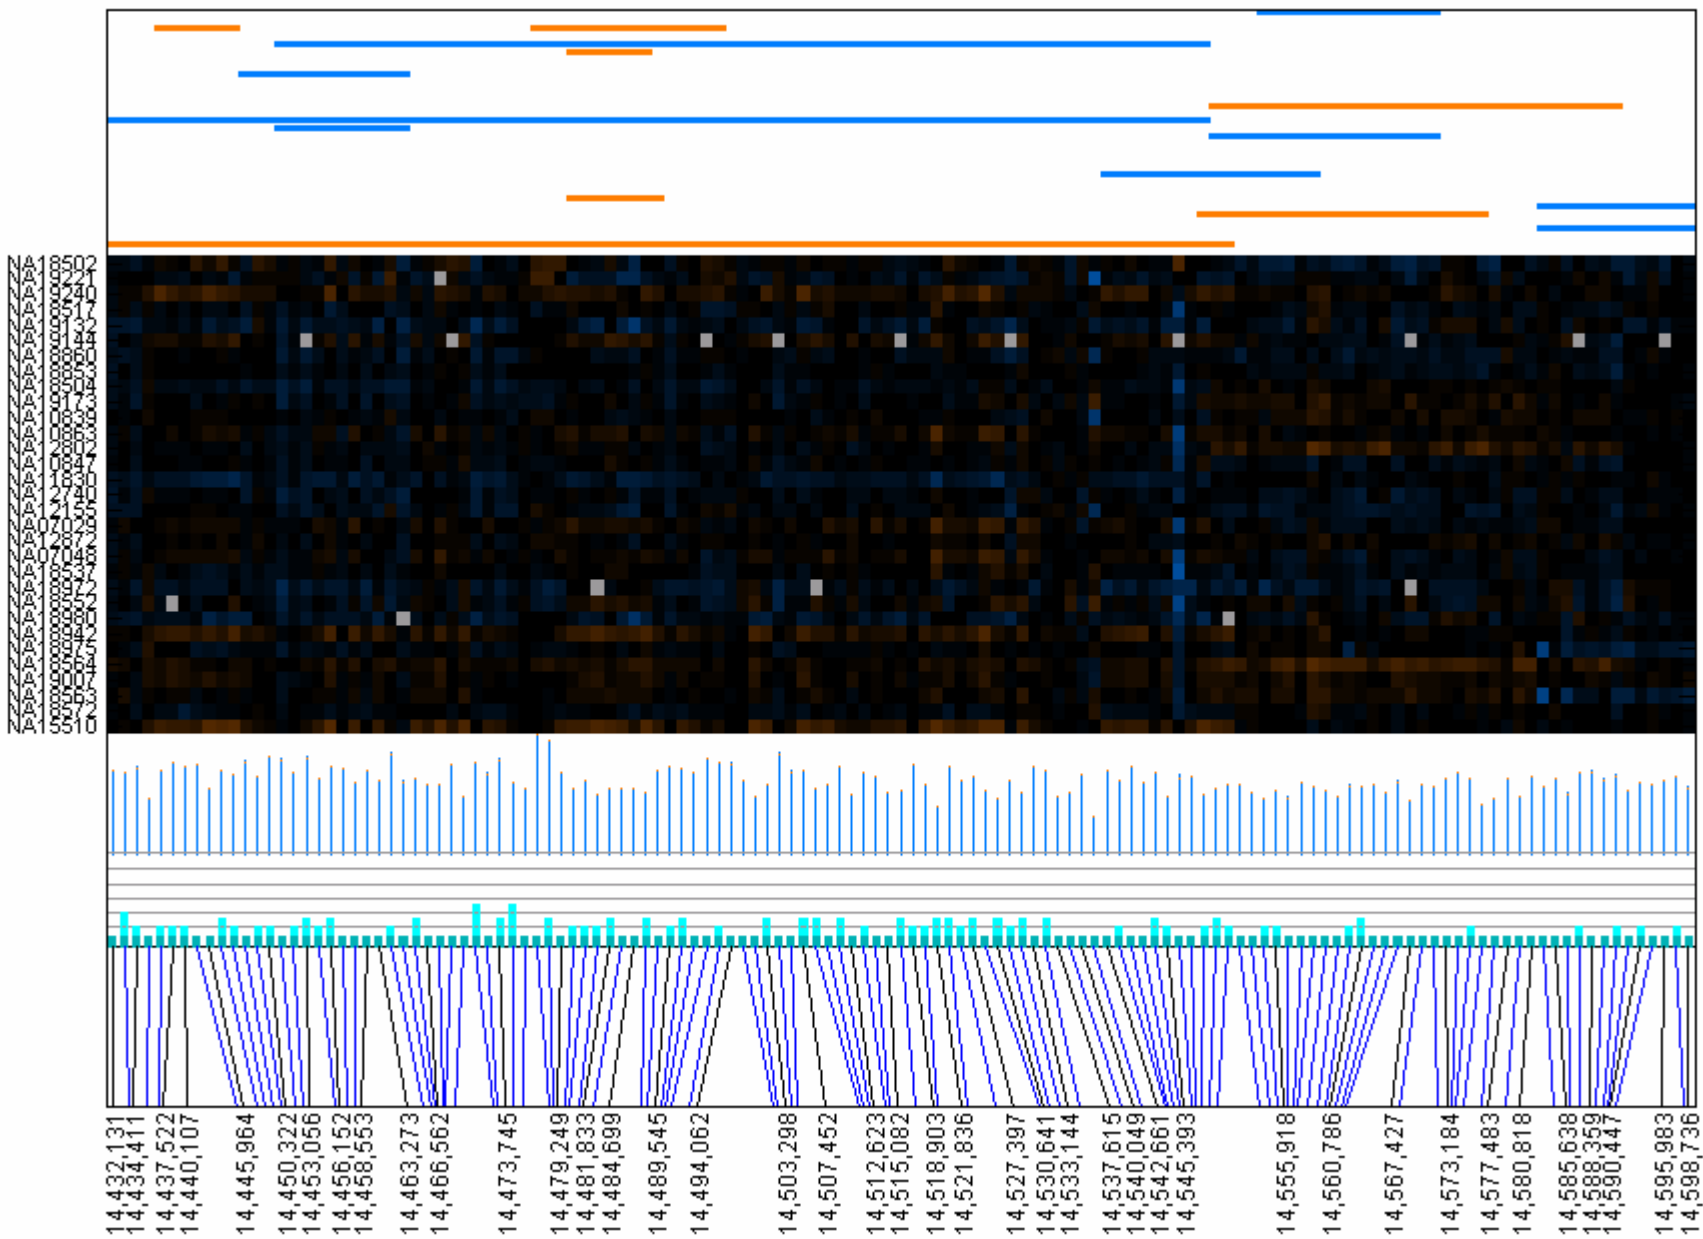

# chr19:022781854-023444696

chr19:022781854-023444696

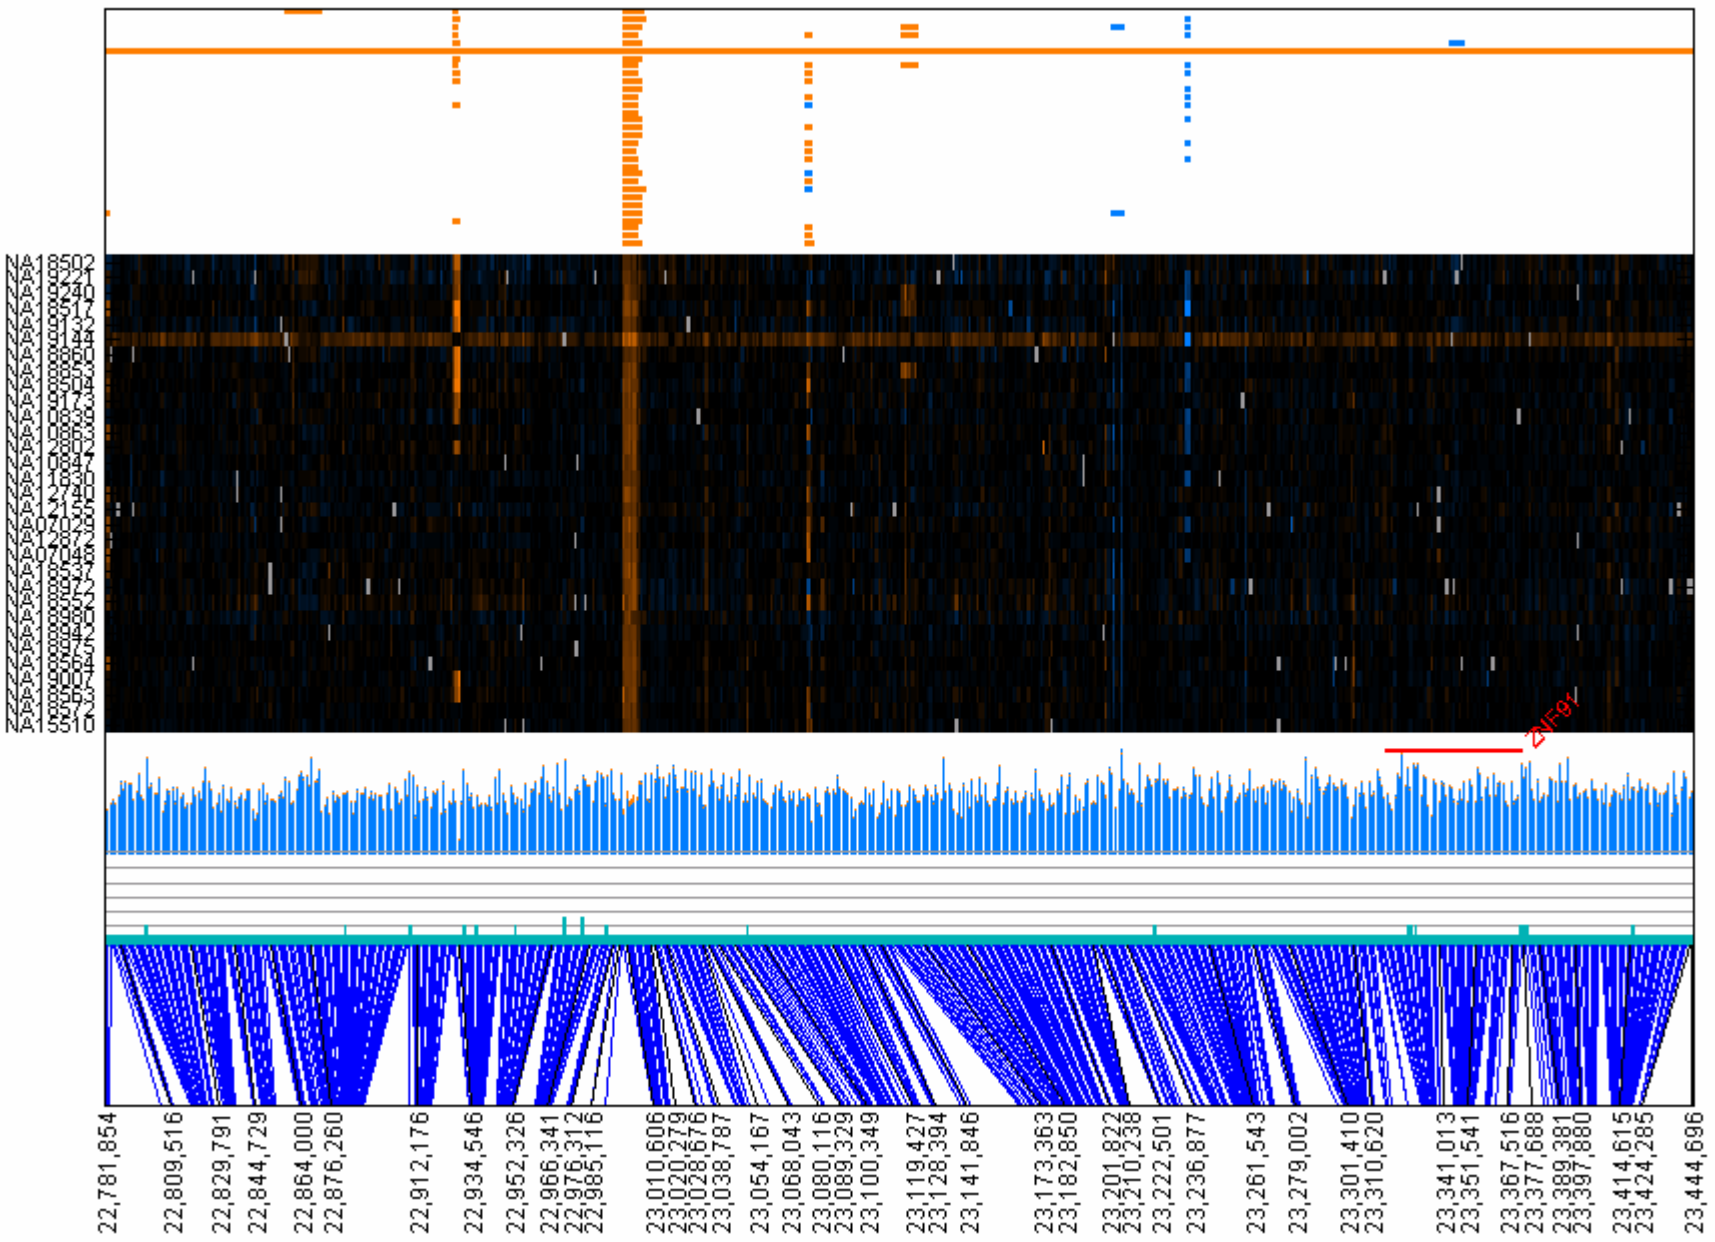

# chr19:043969766-043976000

chr19:043969766-043976000

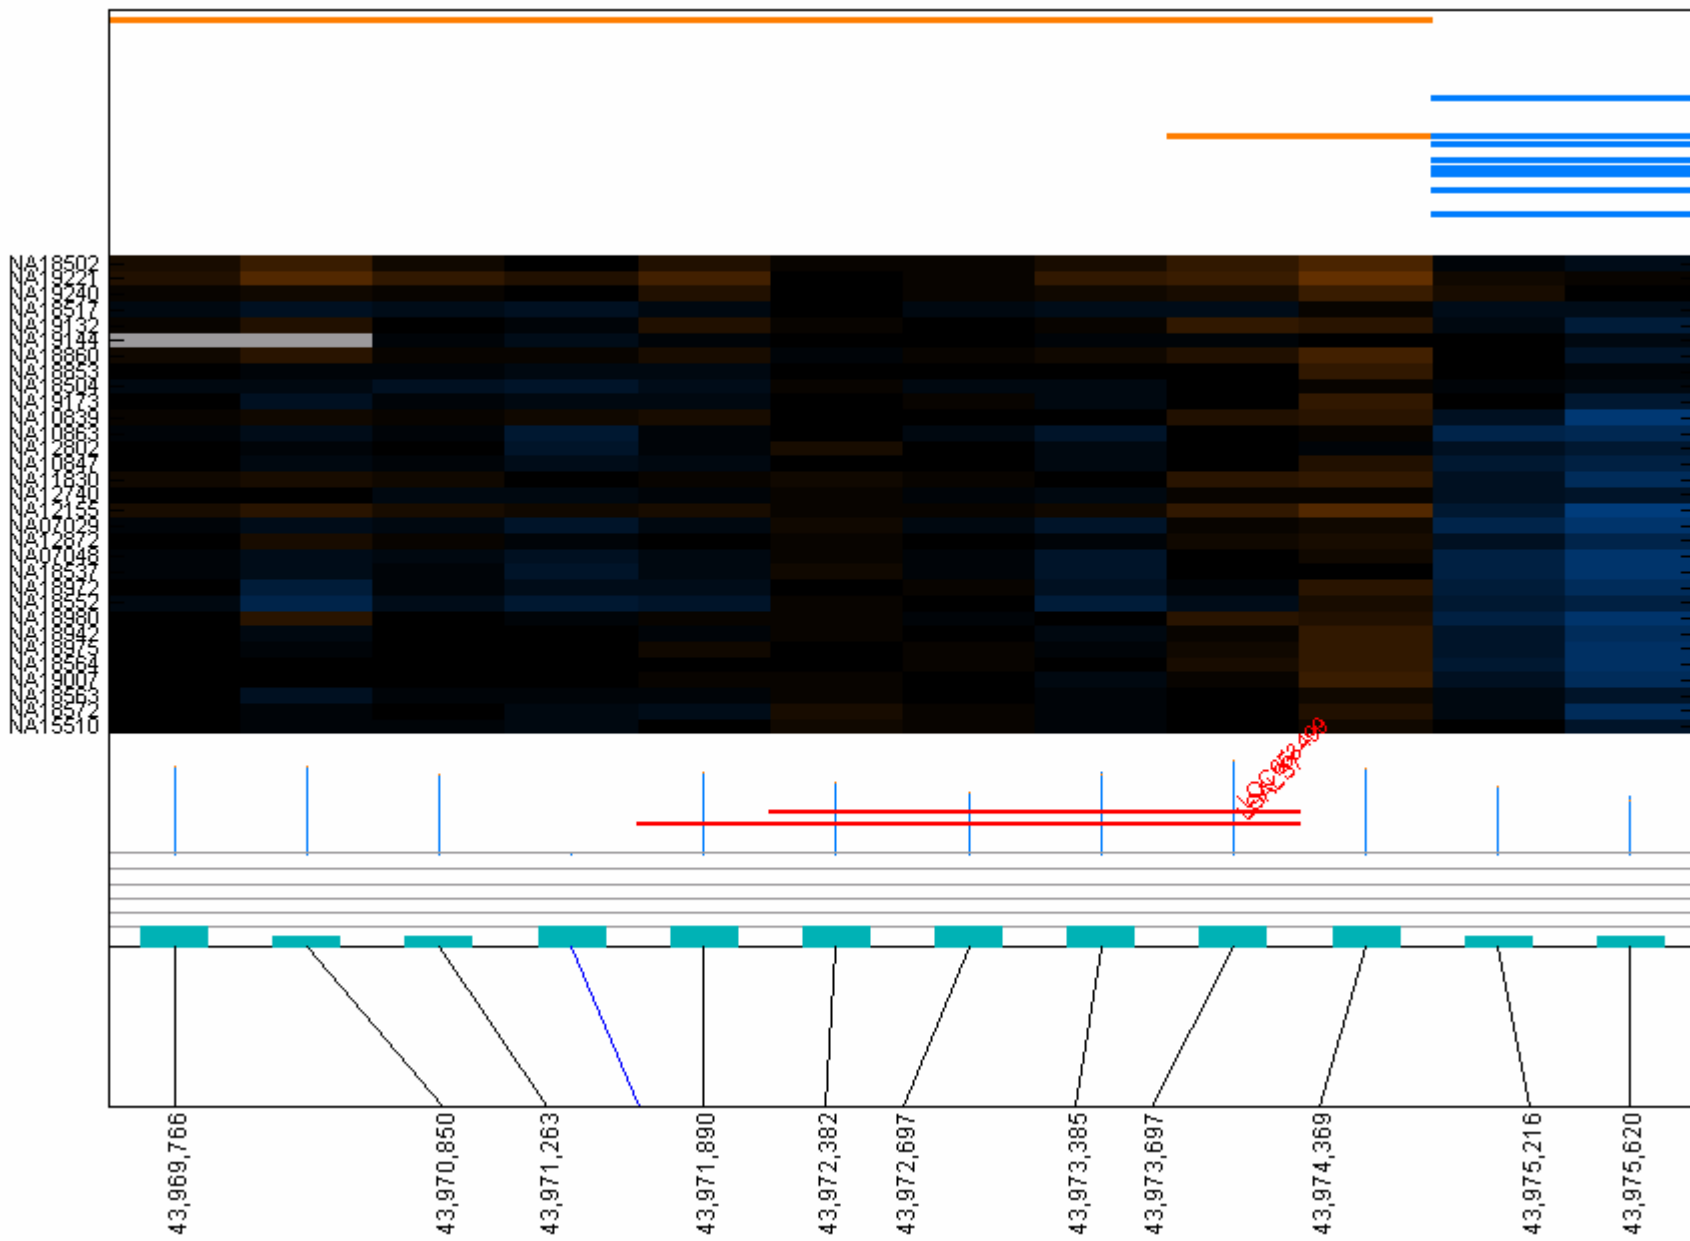

# chr19:047906372-048490564

chr19:047906372-048490564

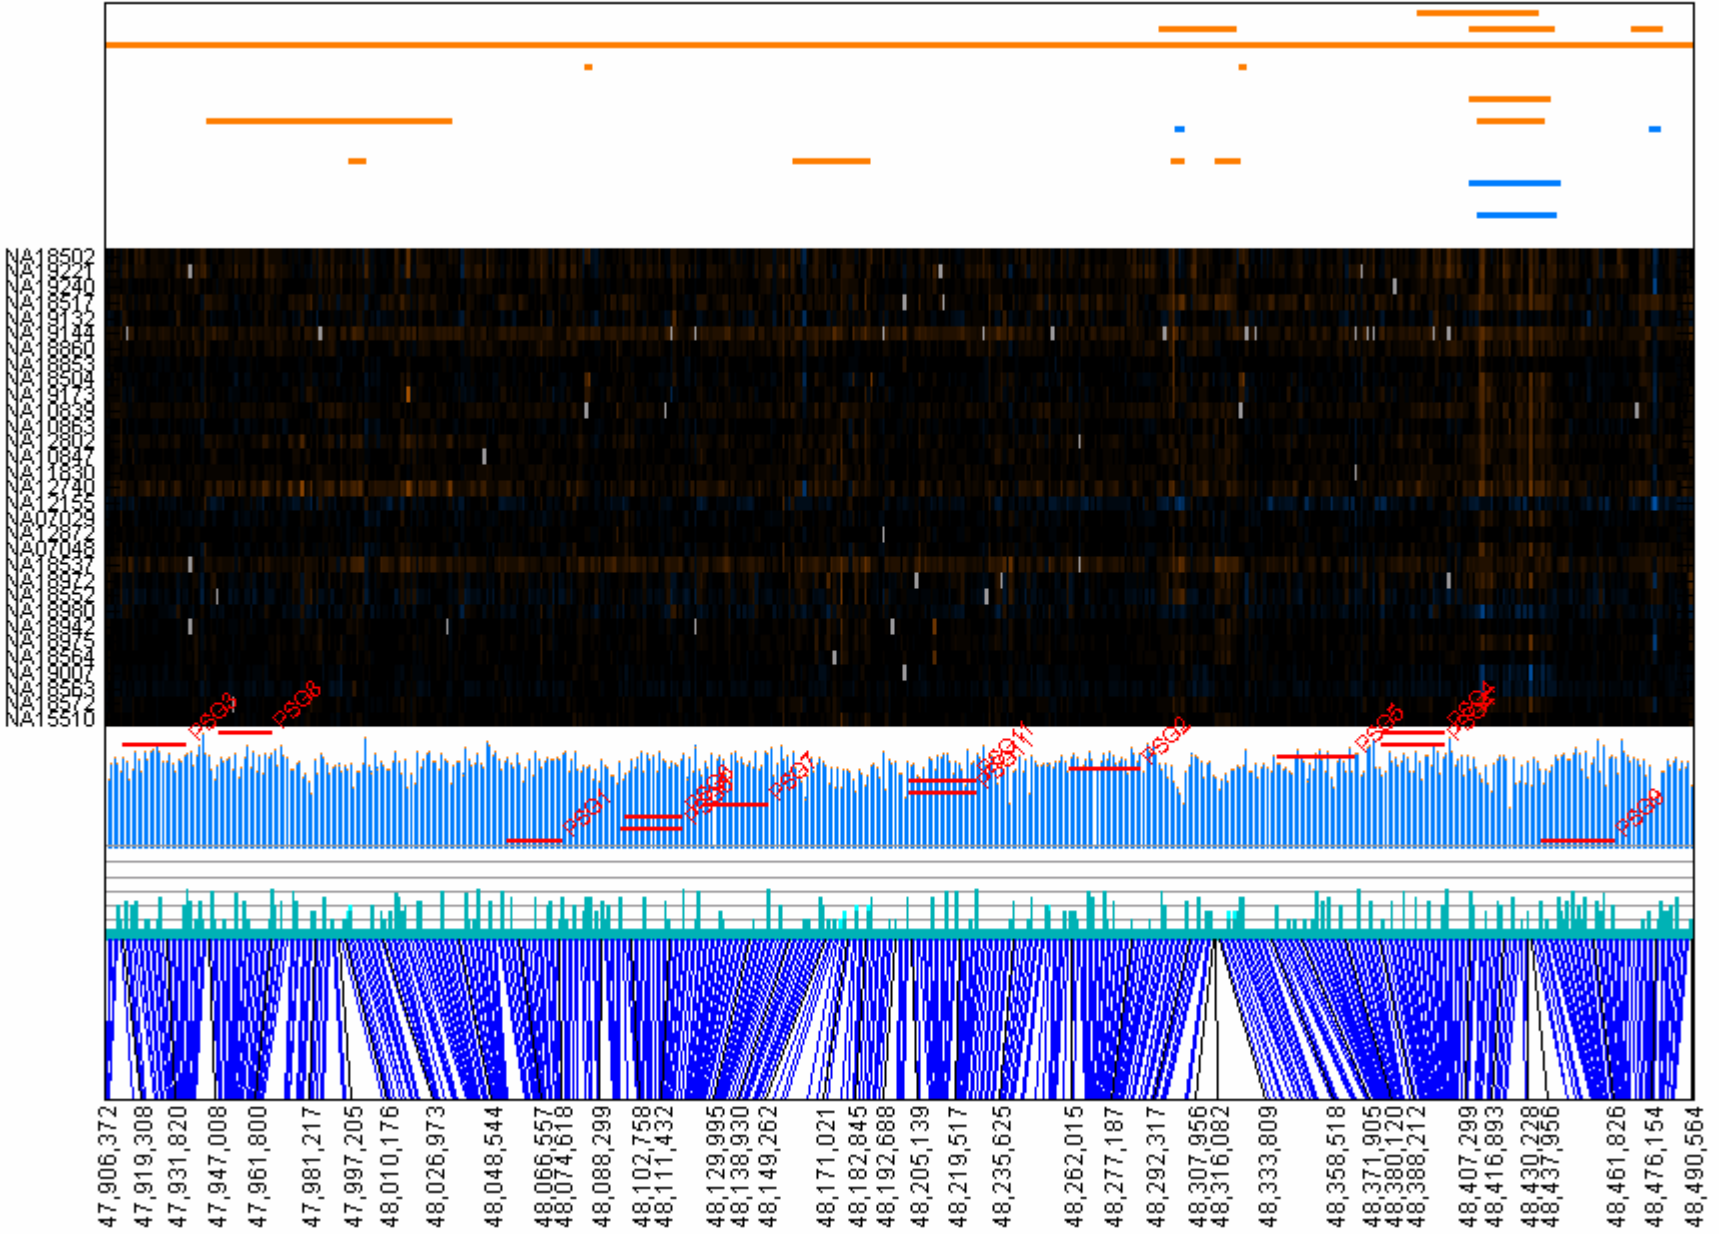



# chr21:010028634-010147688

chr21:010028634-010147688

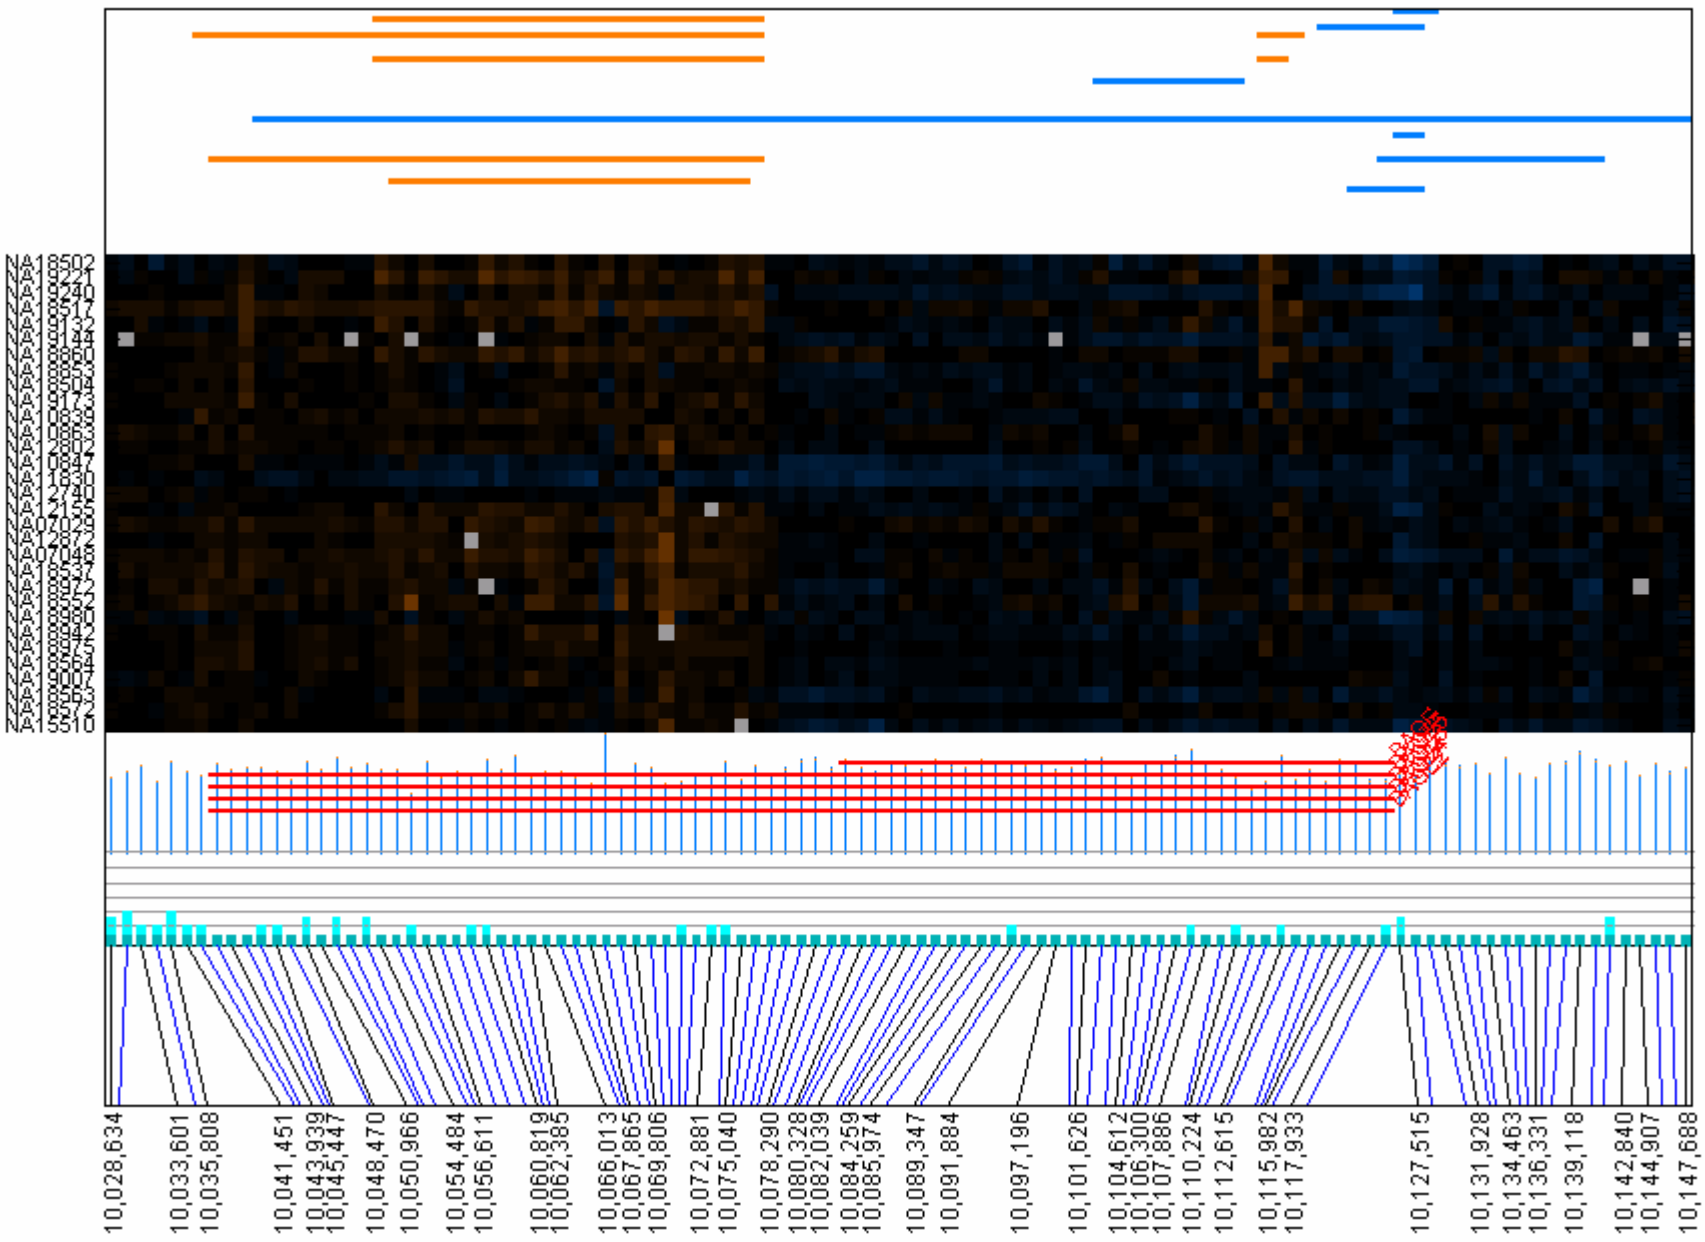

# chr22:017030392-017259084

chr22:017030392-017259084

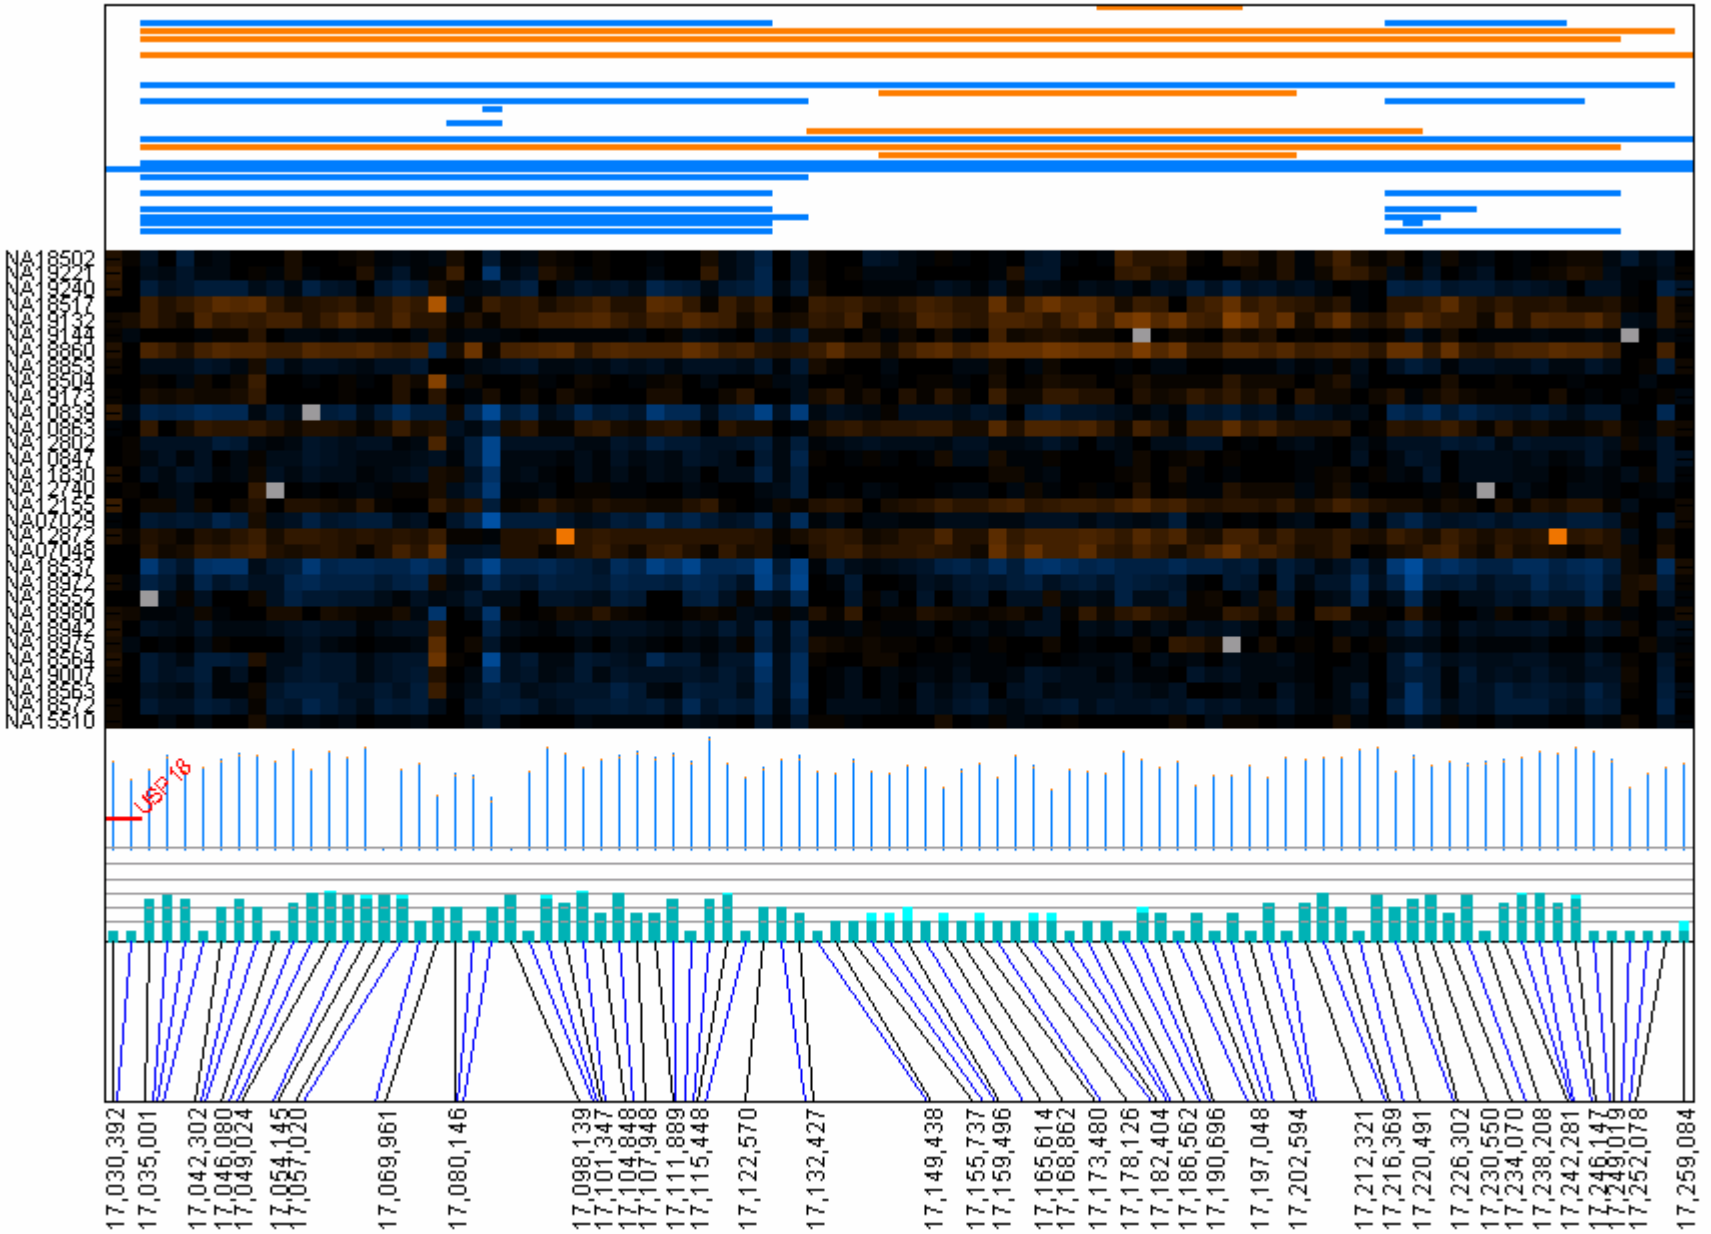

# chr22:018684960-019752935

chr22:018684960-019752935

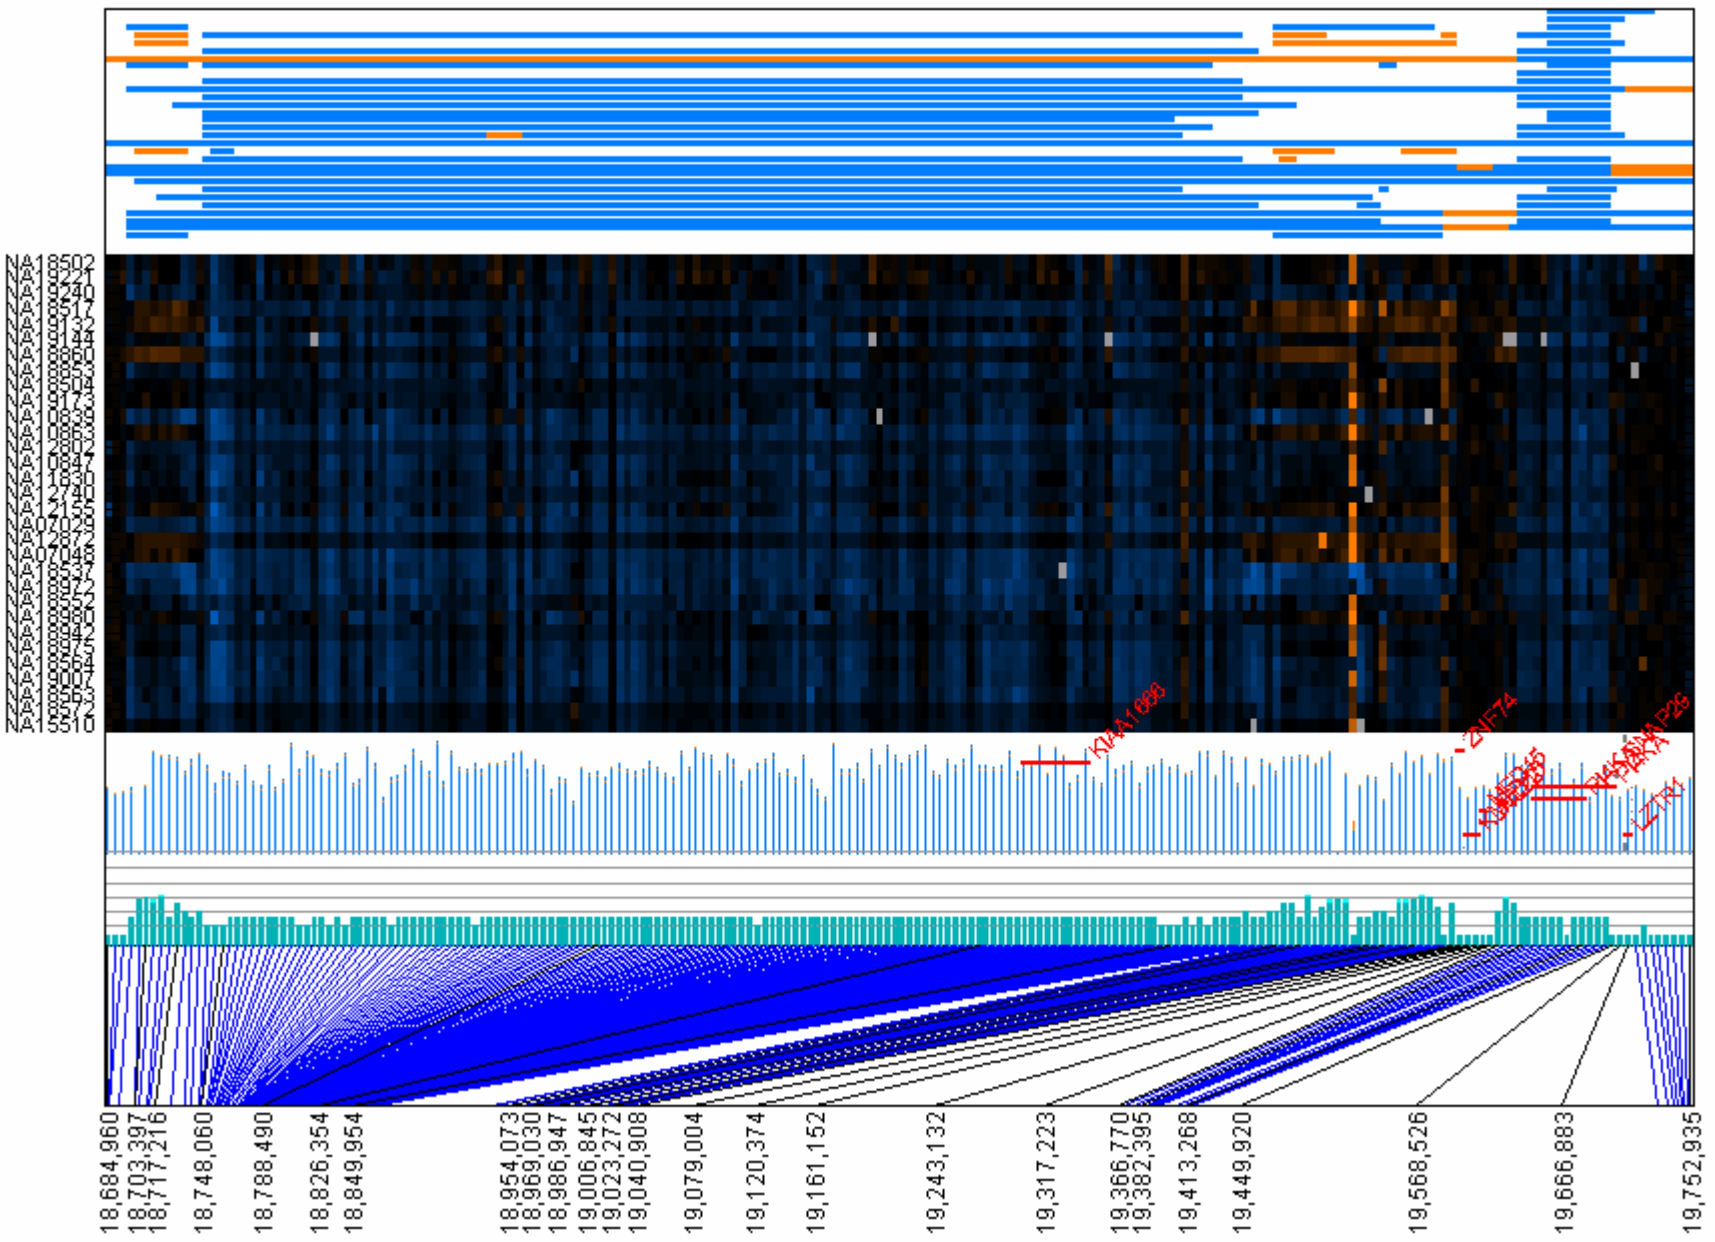

# chr22:019753509-020129460

chr22:019753509-020129460

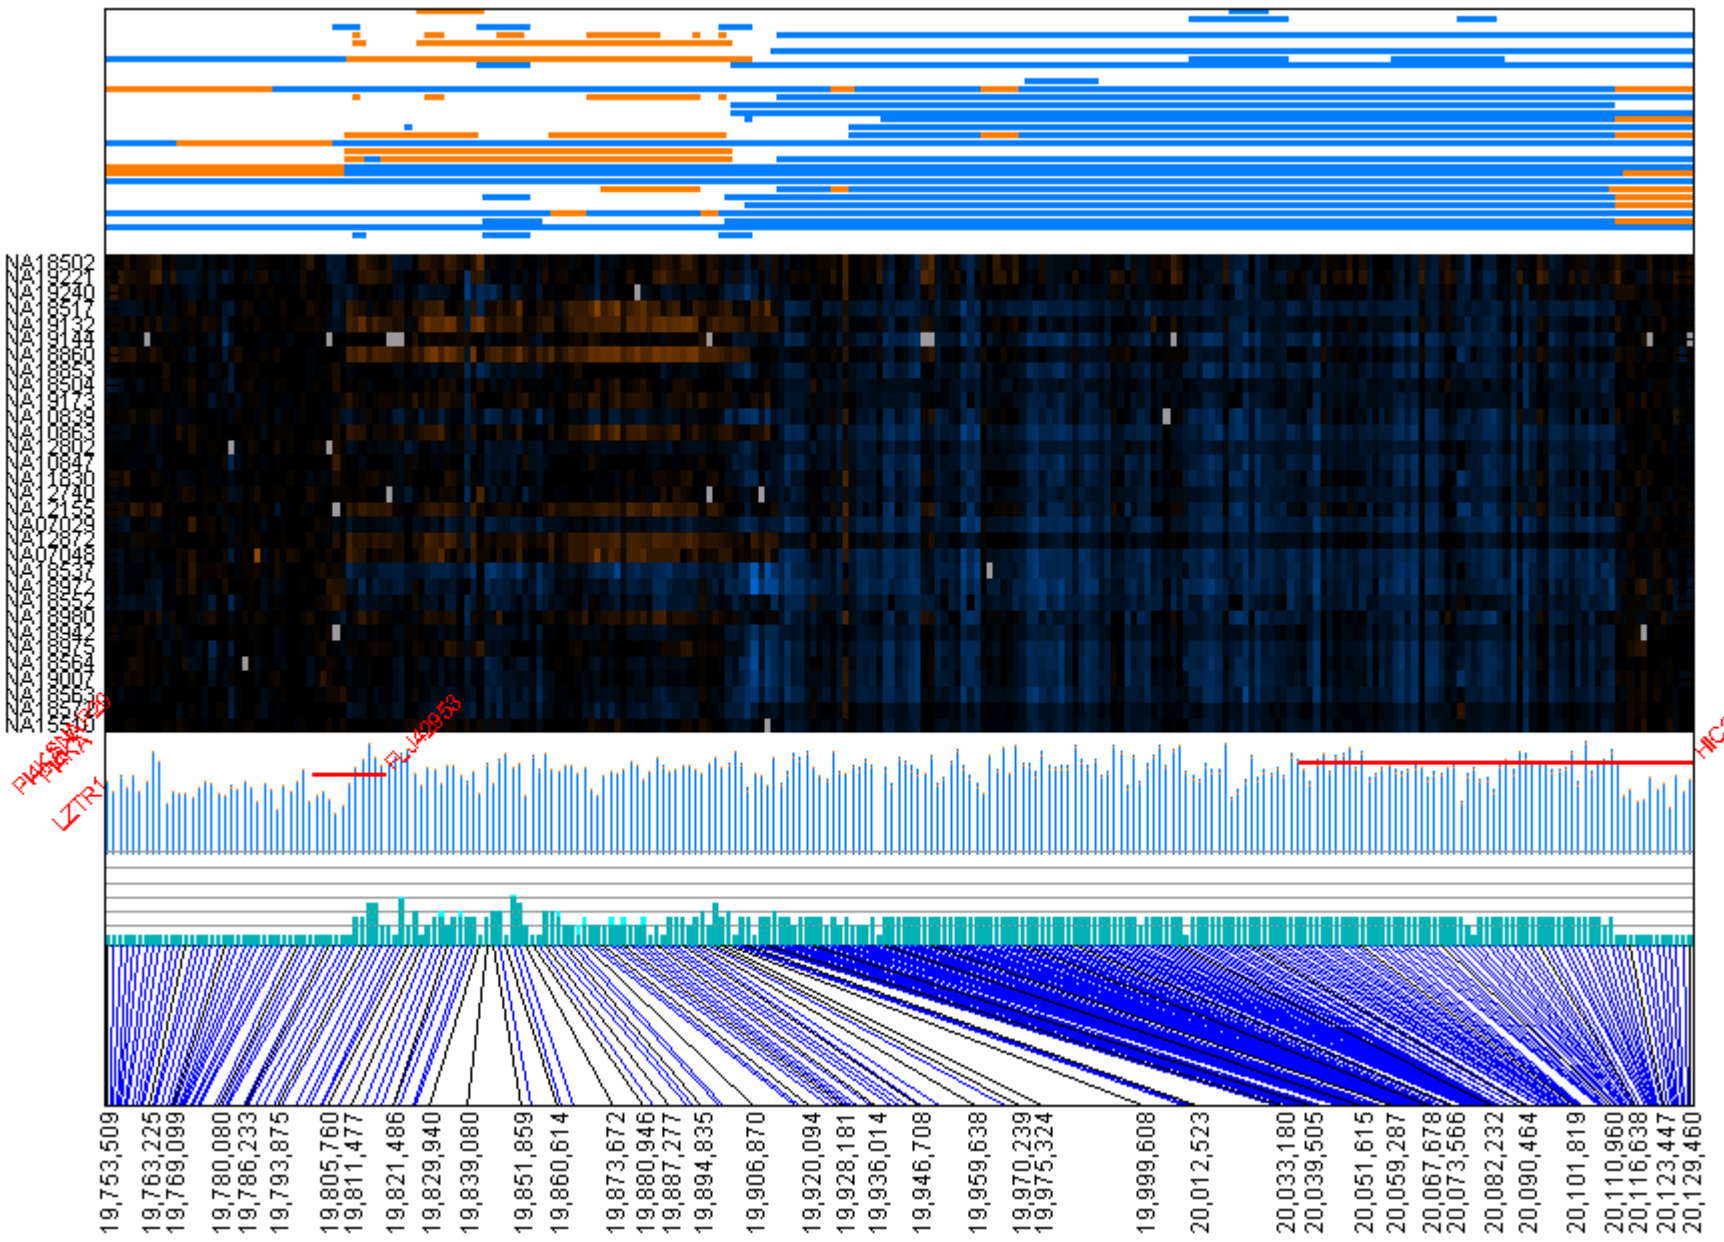

ZNF74  
KMT6B  
KMT6B  
PKnox1  
HNF1A  
LZTR1

ELAVL1

HC2

# chr22:022602240-022730101

chr22:022602240-022730101

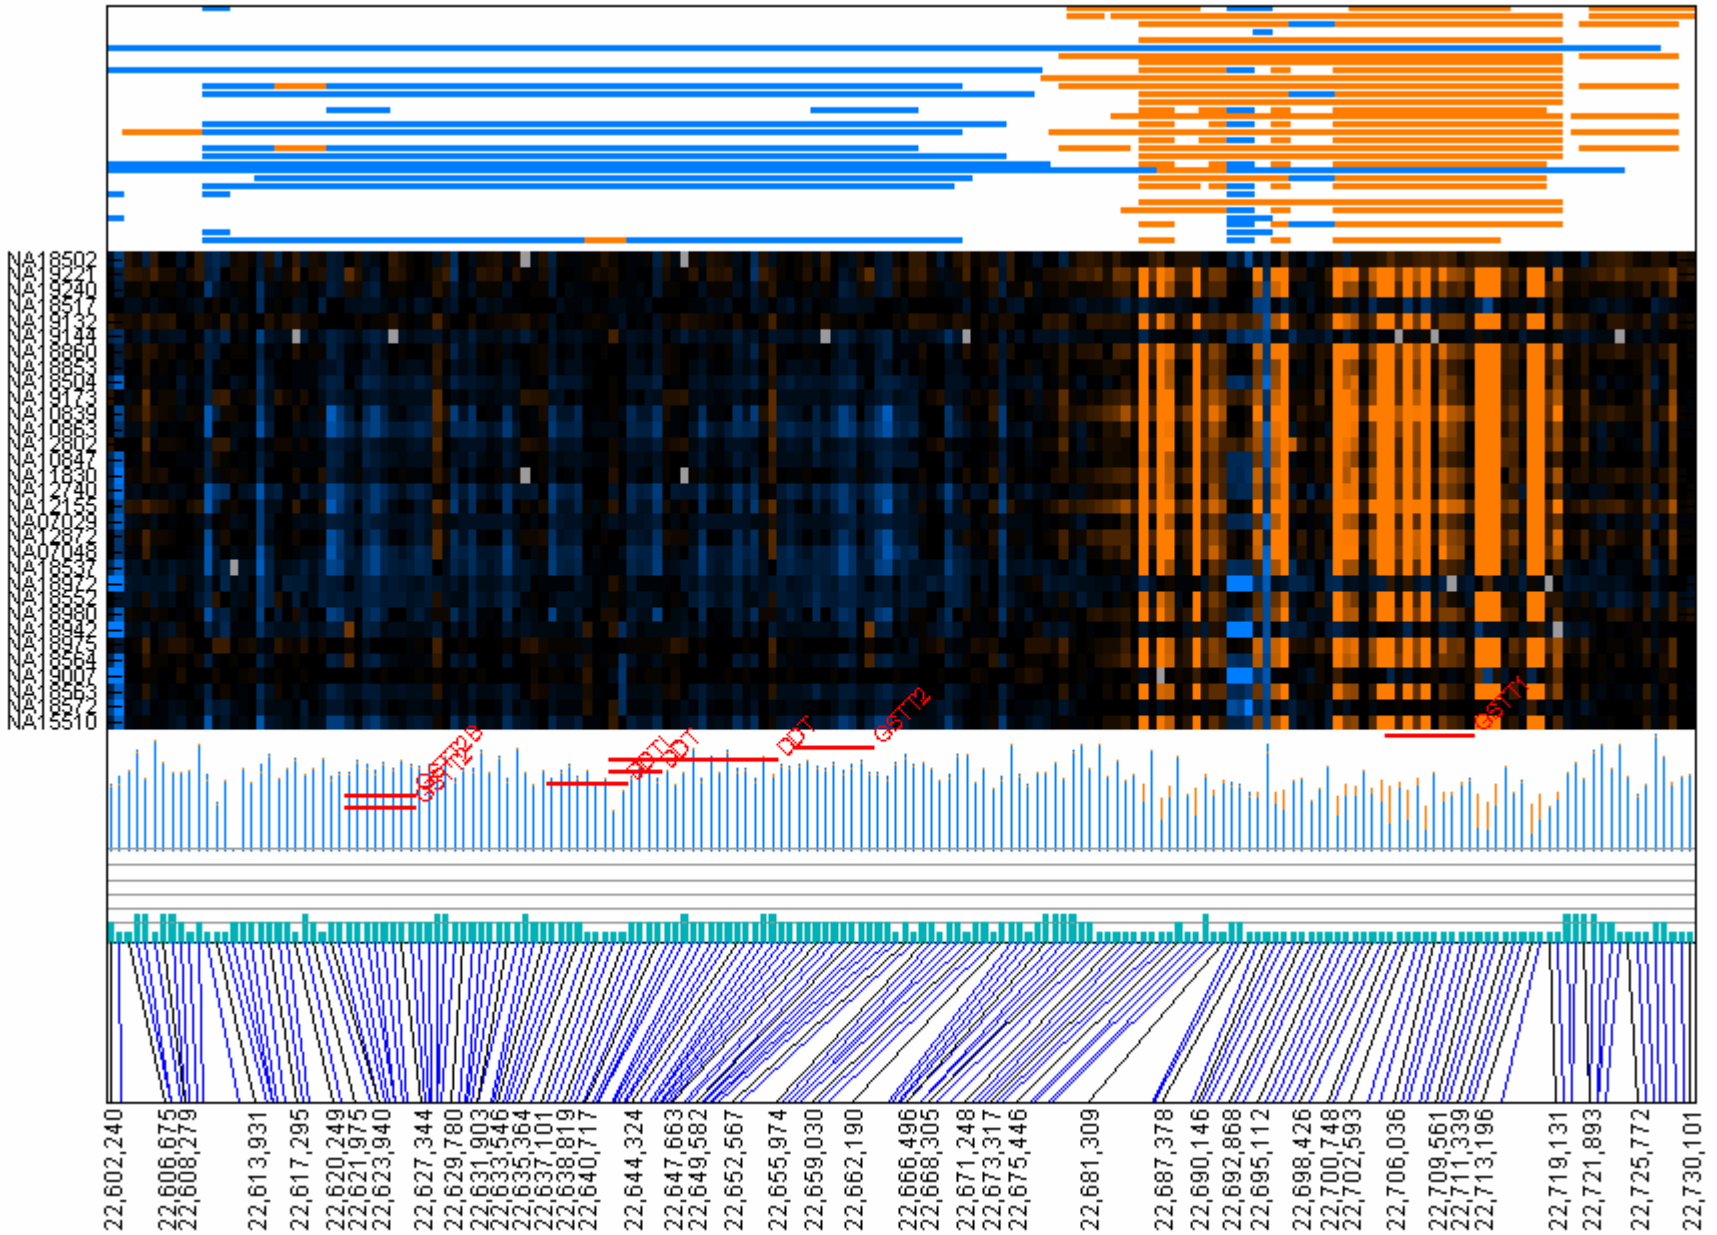

# chr22:041209490-041305603

chr22:041209490-041305603

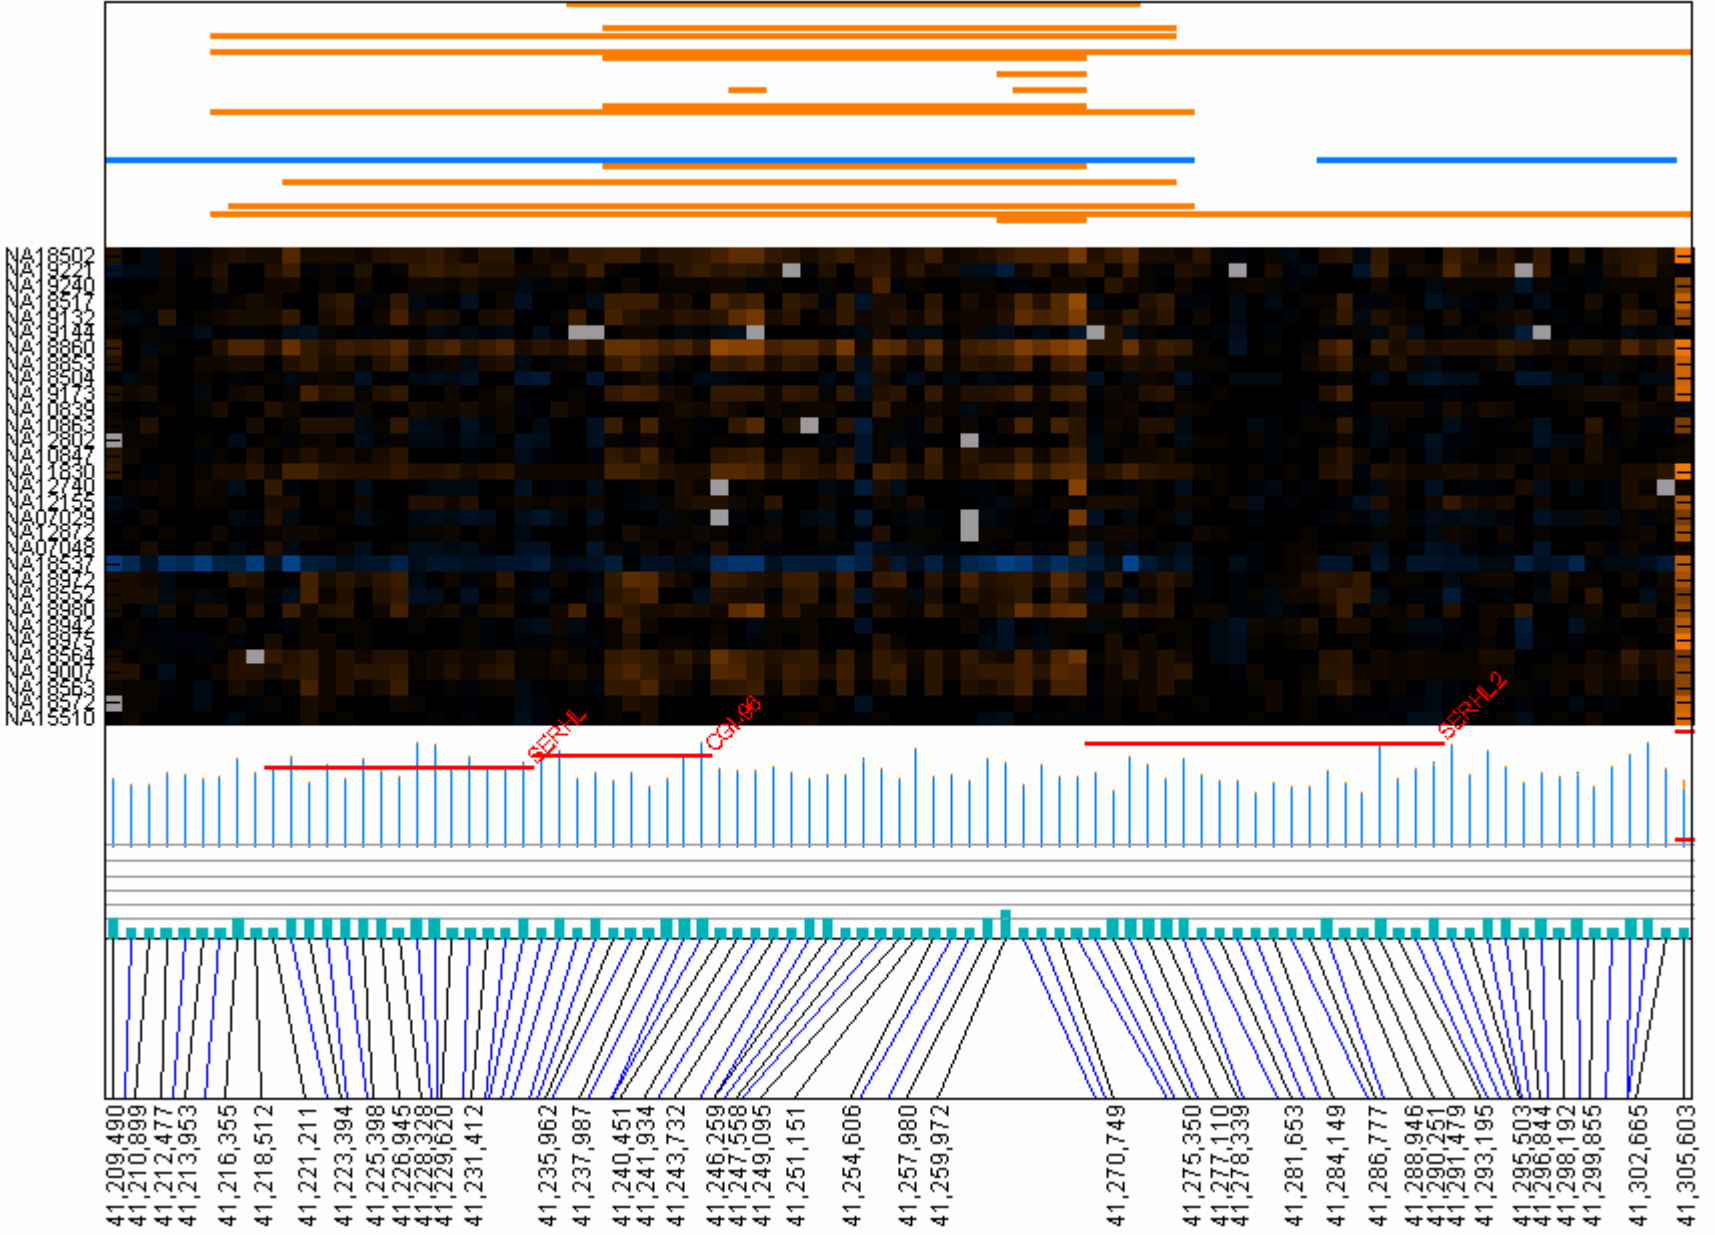

Supplement: mmc3.pdf [file mmc3.pdf]
