# Supplementary material
Source: PubMed Central journal article supplement (PMC2661628)
Supplement: mmc4.pdf [file mmc4.pdf]

**Supplementary Table 1:** Sample-level CNV calls for 30 HapMap individuals, using all genome-wide perfect match probes.

| #  | Test Samp | Barcodes | Chr  | ChrNum | (h StartBp (hg17) | EndBp (hg17) | SizeBp | NumOfProl | MeanLogR  | Std Dev  | OuterStart (hg17) <sup>1</sup> | InnerStart (hg17) <sup>2</sup> | InnerEnd (hg17) <sup>3</sup> | OuterEnd (hg17) <sup>1</sup> |
|----|-----------|----------|------|--------|-------------------|--------------|--------|-----------|-----------|----------|--------------------------------|--------------------------------|------------------------------|------------------------------|
| 1  | NA18504   | [2515685 | chr1 | 1      | 11100             | 25706        | 14607  | 34        | 0.293573  | 0.024185 | 10927                          | 11274                          | 25566                        | 25846                        |
| 2  | NA18504   | [2515685 | chr1 | 1      | 29401             | 76985        | 47585  | 55        | 0.70468   | 0.020033 | 27752                          | 31050                          | 76641                        | 77329                        |
| 3  | NA18504   | [2515685 | chr1 | 1      | 401383            | 401535       | 153    | 2         | 0.787871  | 0.118756 | 401318                         | 401448                         | 401448                       | 401622                       |
| 4  | NA18504   | [2515685 | chr1 | 1      | 601047            | 612159       | 11113  | 8         | -1.046087 | 0.055555 | 587801                         | 604315                         | 610122                       | 614196                       |
| 5  | NA18504   | [2515685 | chr1 | 1      | 667876            | 668028       | 153    | 2         | 0.787871  | 0.118756 | 667789                         | 667963                         | 667963                       | 668093                       |
| 6  | NA18504   | [2515685 | chr1 | 1      | 1207651           | 1209799      | 2149   | 2         | 0.773487  | 0.122964 | 1207264                        | 1208038                        | 1208915                      | 1210683                      |
| 7  | NA18504   | [2515685 | chr1 | 1      | 1649081           | 1715812      | 66732  | 85        | -0.392174 | 0.01545  | 1597760                        | 1652349                        | 1715548                      | 1716076                      |
| 8  | NA18504   | [2515685 | chr1 | 1      | 1853012           | 1854645      | 1634   | 2         | 1.517574  | 0.106275 | 1852616                        | 1853409                        | 1853816                      | 1855474                      |
| 9  | NA18504   | [2515685 | chr1 | 1      | 5304270           | 5305267      | 998    | 20        | 0.265273  | 0.032792 | 5303963                        | 5304578                        | 5305148                      | 5305386                      |
| 10 | NA18504   | [2515685 | chr1 | 1      | 10416438          | 10418311     | 1874   | 2         | -0.836729 | 0.102373 | 10415863                       | 10417014                       | 10417712                     | 10418917                     |
| 11 | NA18504   | [2515685 | chr1 | 1      | 12842868          | 12855470     | 12603  | 23        | 0.343655  | 0.029451 | 12842632                       | 12843104                       | 12855210                     | 12855730                     |
| 12 | NA18504   | [2515685 | chr1 | 1      | 12884329          | 12886858     | 2530   | 4         | 0.558071  | 0.062315 | 12884224                       | 12884434                       | 12886536                     | 12887180                     |
| 13 | NA18504   | [2515685 | chr1 | 1      | 12926542          | 12926956     | 415    | 2         | -1.977967 | 0.153778 | 12926307                       | 12926778                       | 12926804                     | 12927100                     |
| 14 | NA18504   | [2515685 | chr1 | 1      | 13069202          | 13074923     | 5722   | 4         | -0.342437 | 0.065566 | 13015127                       | 13072470                       | 13074668                     | 13075171                     |
| 15 | NA18504   | [2515685 | chr1 | 1      | 13086012          | 13092466     | 6455   | 4         | -0.696823 | 0.06772  | 13085102                       | 13086922                       | 13092237                     | 13092691                     |
| 16 | NA18504   | [2515685 | chr1 | 1      | 13159940          | 13162706     | 2767   | 4         | 0.577002  | 0.058444 | 13159618                       | 13160263                       | 13162366                     | 13163304                     |
| 17 | NA18504   | [2515685 | chr1 | 1      | 13229863          | 13236232     | 6370   | 2         | -0.617823 | 0.081819 | 13228358                       | 13231368                       | 13235848                     | 13236610                     |
| 18 | NA18504   | [2515685 | chr1 | 1      | 13380737          | 13386788     | 6052   | 12        | 0.342053  | 0.034574 | 13380415                       | 13381060                       | 13386480                     | 13387097                     |
| 19 | NA18504   | [2515685 | chr1 | 1      | 13451600          | 13457066     | 5467   | 2         | -0.617823 | 0.081819 | 13451001                       | 13452200                       | 13456679                     | 13457457                     |
| 20 | NA18504   | [2515685 | chr1 | 1      | 16522975          | 16524502     | 1528   | 2         | -0.631673 | 0.102832 | 16522323                       | 16523627                       | 16524165                     | 16524831                     |
| 21 | NA18504   | [2515685 | chr1 | 1      | 25352992          | 25409301     | 56310  | 58        | 0.324418  | 0.019147 | 25352754                       | 25353230                       | 25408840                     | 25409767                     |
| 22 | NA18504   | [2515685 | chr1 | 1      | 25434181          | 25439981     | 5801   | 14        | 0.306762  | 0.038697 | 25433990                       | 25434373                       | 25438920                     | 25441047                     |
| 23 | NA18504   | [2515685 | chr1 | 1      | 31403655          | 31405744     | 2090   | 2         | 0.49504   | 0.091501 | 31403378                       | 31403933                       | 31405227                     | 31406267                     |
| 24 | NA18504   | [2515685 | chr1 | 1      | 75846084          | 75847143     | 1060   | 2         | -0.729106 | 0.101408 | 75845788                       | 75846380                       | 75846935                     | 75847357                     |
| 25 | NA18504   | [2515685 | chr1 | 1      | 89188689          | 89190762     | 2074   | 4         | 2.289334  | 0.127321 | 89188470                       | 89188908                       | 89190458                     | 89191067                     |
| 26 | NA18504   | [2515685 | chr1 | 1      | 103848297         | 103853121    | 4825   | 5         | 0.323821  | 0.06429  | 103842566                      | 103851565                      | 103853023                    | 103853217                    |
| 27 | NA18504   | [2515685 | chr1 | 1      | 103866317         | 103873304    | 6988   | 10        | 0.358309  | 0.047711 | 103865345                      | 103867290                      | 103873021                    | 10387358                     |
| 28 | NA18504   | [2515685 | chr1 | 1      | 105728161         | 105735462    | 7302   | 8         | -0.867498 | 0.059031 | 105727820                      | 105728503                      | 105734532                    | 10573639                     |
| 29 | NA18504   | [2515685 | chr1 | 1      | 108444641         | 108449550    | 4910   | 9         | 0.83241   | 0.052066 | 108443817                      | 108445466                      | 108449224                    | 108449877                    |
| 30 | NA18504   | [2515685 | chr1 | 1      | 108514938         | 108564958    | 50021  | 58        | 0.367773  | 0.019682 | 108514864                      | 108515012                      | 108564894                    | 10856502                     |
| 31 | NA18504   | [2515685 | chr1 | 1      | 108638096         | 108688767    | 50672  | 60        | 0.36748   | 0.019175 | 108637939                      | 108638254                      | 108688693                    | 10868884                     |
| 32 | NA18504   | [2515685 | chr1 | 1      | 112405902         | 112416691    | 10790  | 10        | 0.639245  | 0.050769 | 112405415                      | 112406389                      | 112416423                    | 11241696                     |
| 33 | NA18504   | [2515685 | chr1 | 1      | 141918111         | 141918521    | 411    | 2         | 0.896076  | 0.090818 | 141917953                      | 141918270                      | 141918279                    | 14191876                     |
| 34 | NA18504   | [2515685 | chr1 | 1      | 142744385         | 142745273    | 889    | 2         | 0.921365  | 0.11918  | 142743794                      | 142744976                      | 142745023                    | 14274552                     |
| 35 | NA18504   | [2515685 | chr1 | 1      | 145046862         | 145047267    | 406    | 2         | 0.896073  | 0.090818 | 145046708                      | 145047016                      | 145047025                    | 14504750                     |
| 36 | NA18504   | [2515685 | chr1 | 1      | 145819541         | 145821079    | 1539   | 2         | 0.869831  | 0.103419 | 145819262                      | 145819821                      | 145820633                    | 14582152                     |
| 37 | NA18504   | [2515685 | chr1 | 1      | 145828366         | 145840436    | 12071  | 9         | 0.450591  | 0.050745 | 145827896                      | 145828836                      | 145840201                    | 14584067                     |
| 38 | NA18504   | [2515685 | chr1 | 1      | 145855196         | 145860363    | 5168   | 5         | 0.578481  | 0.066121 | 145848112                      | 145858464                      | 145860127                    | 14586059                     |
| 39 | NA18504   | [2515685 | chr1 | 1      | 145896002         | 145899638    | 3637   | 3         | 0.679546  | 0.093747 | 145894632                      | 145897372                      | 145899362                    | 14589991                     |
| 40 | NA18504   | [2515685 | chr1 | 1      | 145930102         | 145951531    | 21430  | 25        | 0.481547  | 0.029311 | 145929732                      | 145930472                      | 145951467                    | 14595159                     |
| 41 | NA18504   | [2515685 | chr1 | 1      | 146389143         | 146389545    | 403    | 2         | 0.896076  | 0.090818 | 146388901                      | 146389385                      | 146389393                    | 14638969                     |
| 42 | NA18504   | [2515685 | chr1 | 1      | 146458878         | 146475780    | 16903  | 13        | 0.270221  | 0.036081 | 146457879                      | 146459877                      | 146473762                    | 14647779                     |
| 43 | NA18504   | [2515685 | chr1 | 1      | 148998878         | 1490005918   | 7041   | 13        | 0.426055  | 0.035516 | 148998401                      | 148999355                      | 149004680                    | 14900715                     |
| 44 | NA18504   | [2515685 | chr1 | 1      | 149368571         | 149399435    | 30865  | 22        | 0.85715   | 0.033977 | 149368105                      | 149369038                      | 149399080                    | 14939979                     |
| 45 | NA18504   | [2515685 | chr1 | 1      | 158225480         | 158253277    | 27798  | 40        | -0.277208 | 0.019137 | 158225276                      | 158225685                      | 158252398                    | 15825415                     |
| 46 | NA18504   | [2515685 | chr1 | 1      | 158293934         | 158377436    | 83503  | 98        | -0.589482 | 0.014788 | 158293643                      | 158294226                      | 158377203                    | 15837767                     |
| 47 | NA18504   | [2515685 | chr1 | 1      | 192140730         | 192148335    | 7606   | 4         | -3.452428 | 0.15753  | 192139191                      | 192142269                      | 192145067                    | 19215249                     |
| 48 | NA18504   | [2515685 | chr1 | 1      | 203245415         | 203247868    | 2454   | 2         | 0.857326  | 0.118217 | 203245018                      | 203245812                      | 203247578                    | 20324815                     |
| 49 | NA18504   | [2515685 | chr1 | 1      | 206859241         | 206951729    | 92489  | 3         | 0.435754  | 0.072097 | 206791904                      | 206862509                      | 206950476                    | 20695298                     |
| 50 | NA18504   | [2515685 | chr1 | 1      | 233202665         | 233204956    | 2292   | 42        | -0.431838 | 0.020247 | 233202312                      | 233203018                      | 233204364                    | 23320554                     |
| 51 | NA18504   | [2515685 | chr1 | 1      | 233448873         | 233459427    | 10555  | 10        | 0.517182  | 0.045713 | 233445733                      | 233452013                      | 233458380                    | 23346047                     |
| 52 | NA18504   | [2515685 | chr1 | 1      | 236719047         | 236720968    | 1922   | 3         | -0.910455 | 0.088986 | 236718751                      | 236719344                      | 236720749                    | 23672118                     |
| 53 | NA18504   | [2515685 | chr1 | 1      | 242722491         | 242725731    | 3241   | 2         | -0.536488 | 0.09782  | 242721008                      | 242723975                      | 242725024                    | 24272643                     |

|             |               |   |           |           |       |     |           |          |           |           |           |          |
|-------------|---------------|---|-----------|-----------|-------|-----|-----------|----------|-----------|-----------|-----------|----------|
| 54 NA18504  | [2515685 chr1 | 1 | 243009520 | 243011368 | 1849  | 3   | -0.897692 | 0.088962 | 243008430 | 243010610 | 243011204 | 24301153 |
| 55 NA18504  | [2515685 chr1 | 1 | 243065466 | 243068137 | 2672  | 4   | -0.793748 | 0.080391 | 243065256 | 243065676 | 243067696 | 24306857 |
| 56 NA18504  | [2515685 chr1 | 1 | 244850108 | 244851538 | 1431  | 2   | 0.949971  | 0.117083 | 244849536 | 244850681 | 244851004 | 24485207 |
| 57 NA18504  | [2515685 chr1 | 1 | 244943351 | 244944075 | 725   | 2   | 0.582251  | 0.109359 | 244943115 | 244943587 | 244943712 | 24494443 |
| 58 NA18504  | [2515685 chr1 | 1 | 244960293 | 244962187 | 1895  | 3   | 0.774721  | 0.095483 | 244959817 | 244960769 | 244961807 | 24496256 |
| 59 NA18504  | [2515685 chr1 | 1 | 245053742 | 245055036 | 1295  | 2   | -1.151452 | 0.145768 | 245053467 | 245054017 | 245054669 | 24505540 |
| 60 NA18504  | [2515685 chr1 | 1 | 245063969 | 245121920 | 57952 | 56  | -0.755674 | 0.020292 | 245063824 | 245064115 | 245121605 | 24512223 |
| 61 NA18504  | [2515685 chr1 | 1 | 245126671 | 245127478 | 808   | 2   | 0.582251  | 0.109359 | 245126313 | 245127029 | 245127154 | 24512780 |
| 62 NA18504  | [2515685 chr1 | 1 | 245192200 | 245200716 | 8517  | 8   | -0.84183  | 0.057935 | 245191047 | 245193354 | 245200082 | 24520135 |
| 63 NA18504  | [2515685 chr2 | 2 | 409864    | 411131    | 1268  | 11  | 0.313132  | 0.041974 | 409612    | 410116    | 411034    | 411225   |
| 64 NA18504  | [2515685 chr2 | 2 | 6248930   | 6258838   | 9909  | 11  | -0.962807 | 0.049532 | 6248417   | 6249444   | 6258311   | 6259366  |
| 65 NA18504  | [2515685 chr2 | 2 | 34606442  | 34644767  | 38326 | 39  | 0.818346  | 0.026718 | 34601818  | 34609397  | 34641812  | 3464839  |
| 66 NA18504  | [2515685 chr2 | 2 | 35896475  | 35905934  | 9460  | 3   | -3.485646 | 0.162213 | 35879425  | 35899430  | 35902979  | 3590982  |
| 67 NA18504  | [2515685 chr2 | 2 | 37869648  | 37911473  | 41826 | 43  | -0.425887 | 0.023087 | 37869077  | 37870220  | 37911214  | 3791173  |
| 68 NA18504  | [2515685 chr2 | 2 | 41150168  | 41161411  | 11244 | 13  | -3.25101  | 0.079848 | 41149866  | 41150471  | 41160114  | 4116270  |
| 69 NA18504  | [2515685 chr2 | 2 | 51421537  | 51422882  | 1346  | 2   | 0.624125  | 0.106426 | 51421334  | 51421741  | 51422648  | 5142311  |
| 70 NA18504  | [2515685 chr2 | 2 | 56234741  | 56240262  | 5522  | 3   | -0.839219 | 0.086538 | 56230559  | 56237696  | 56239959  | 5624056  |
| 71 NA18504  | [2515685 chr2 | 2 | 58735266  | 58736833  | 1568  | 2   | -0.51535  | 0.090742 | 58734865  | 58735667  | 58736407  | 5873725  |
| 72 NA18504  | [2515685 chr2 | 2 | 61675589  | 61676777  | 1189  | 2   | 1.979669  | 0.167248 | 61675200  | 61675979  | 61676468  | 6167708  |
| 73 NA18504  | [2515685 chr2 | 2 | 73922874  | 73948487  | 25614 | 41  | -0.473271 | 0.018547 | 73922730  | 73923019  | 73948060  | 7394891  |
| 74 NA18504  | [2515685 chr2 | 2 | 75296507  | 75298934  | 2428  | 2   | 1.194446  | 0.111972 | 75296056  | 75296959  | 75298532  | 7529933  |
| 75 NA18504  | [2515685 chr2 | 2 | 87474786  | 87478765  | 3980  | 8   | 0.385747  | 0.050718 | 87474526  | 87475047  | 87478435  | 8747909  |
| 76 NA18504  | [2515685 chr2 | 2 | 97184386  | 97189737  | 5352  | 2   | -0.888922 | 0.104017 | 97182781  | 97185992  | 97186782  | 9719672  |
| 77 NA18504  | [2515685 chr2 | 2 | 97613796  | 97614932  | 1137  | 2   | 1.790799  | 0.143998 | 97613553  | 97614040  | 97614467  | 9761539  |
| 78 NA18504  | [2515685 chr2 | 2 | 97623328  | 97625124  | 1797  | 2   | 0.630627  | 0.115504 | 97622901  | 97623755  | 97624856  | 9762539  |
| 79 NA18504  | [2515685 chr2 | 2 | 106339466 | 106344320 | 4855  | 6   | -0.585109 | 0.069727 | 106339069 | 106339864 | 106344055 | 10634458 |
| 80 NA18504  | [2515685 chr2 | 2 | 107475477 | 107477568 | 2092  | 2   | -0.891678 | 0.132673 | 107474333 | 107476621 | 107477239 | 10747789 |
| 81 NA18504  | [2515685 chr2 | 2 | 114051424 | 114063243 | 11820 | 28  | 0.317253  | 0.025947 | 114051285 | 114051564 | 114062770 | 11406371 |
| 82 NA18504  | [2515685 chr2 | 2 | 115108324 | 115118866 | 10543 | 10  | -0.856697 | 0.055853 | 115107995 | 115108654 | 115118291 | 11511944 |
| 83 NA18504  | [2515685 chr2 | 2 | 126159437 | 126168349 | 8913  | 3   | -3.097969 | 0.151294 | 126158494 | 126160381 | 126168048 | 12616865 |
| 84 NA18504  | [2515685 chr2 | 2 | 129261115 | 129263267 | 2153  | 3   | -0.474227 | 0.079996 | 129260775 | 129261456 | 129263086 | 12926344 |
| 85 NA18504  | [2515685 chr2 | 2 | 129631388 | 129635040 | 3653  | 3   | 0.456723  | 0.087651 | 129631157 | 129631620 | 129634849 | 12963523 |
| 86 NA18504  | [2515685 chr2 | 2 | 130265328 | 130274460 | 9133  | 13  | -0.597418 | 0.043256 | 130264902 | 130265754 | 130273870 | 13027505 |
| 87 NA18504  | [2515685 chr2 | 2 | 130407770 | 130483330 | 75561 | 86  | -0.327713 | 0.015922 | 130407394 | 130408146 | 130483142 | 13048351 |
| 88 NA18504  | [2515685 chr2 | 2 | 130498267 | 130502777 | 4511  | 10  | -0.300477 | 0.044463 | 130497934 | 130498600 | 130502508 | 13050304 |
| 89 NA18504  | [2515685 chr2 | 2 | 130885569 | 130895798 | 10230 | 17  | -0.307282 | 0.034454 | 130885118 | 130886020 | 130893881 | 13089771 |
| 90 NA18504  | [2515685 chr2 | 2 | 131472382 | 131480648 | 8267  | 9   | -0.709512 | 0.057857 | 131471786 | 131472978 | 131478968 | 13148232 |
| 91 NA18504  | [2515685 chr2 | 2 | 131765079 | 131784546 | 19468 | 30  | -0.391322 | 0.026093 | 131749458 | 131768034 | 131783971 | 13178512 |
| 92 NA18504  | [2515685 chr2 | 2 | 131853676 | 131871669 | 17994 | 33  | -0.272203 | 0.02397  | 131853197 | 131854155 | 131869538 | 13187380 |
| 93 NA18504  | [2515685 chr2 | 2 | 131897483 | 131907608 | 10126 | 14  | -0.295392 | 0.038132 | 131895593 | 131899373 | 131907180 | 13190803 |
| 94 NA18504  | [2515685 chr2 | 2 | 131919064 | 131953962 | 34899 | 46  | -0.308703 | 0.022139 | 131918907 | 131919221 | 131953571 | 13195435 |
| 95 NA18504  | [2515685 chr2 | 2 | 132127472 | 132131382 | 3911  | 2   | -0.476467 | 0.083334 | 132127160 | 132127784 | 132128427 | 13213581 |
| 96 NA18504  | [2515685 chr2 | 2 | 132146137 | 132182116 | 35980 | 26  | -0.334597 | 0.029588 | 132145137 | 132147138 | 132181940 | 13218229 |
| 97 NA18504  | [2515685 chr2 | 2 | 132230488 | 132323964 | 93477 | 118 | -0.373995 | 0.013328 | 132230033 | 132230944 | 132323290 | 13232463 |
| 98 NA18504  | [2515685 chr2 | 2 | 132332382 | 132340886 | 8505  | 6   | -0.443464 | 0.059893 | 132331267 | 132333497 | 132340628 | 13234114 |
| 99 NA18504  | [2515685 chr2 | 2 | 132846945 | 132868801 | 21857 | 13  | 0.439944  | 0.02823  | 132846760 | 132847131 | 132868624 | 13286897 |
| 100 NA18504 | [2515685 chr2 | 2 | 132871605 | 132880027 | 8423  | 11  | 0.439944  | 0.02823  | 132871306 | 132871904 | 132879756 | 13288029 |
| 101 NA18504 | [2515685 chr2 | 2 | 133013470 | 133014760 | 1291  | 2   | -0.661632 | 0.120705 | 133013213 | 133013727 | 133014495 | 13301502 |
| 102 NA18504 | [2515685 chr2 | 2 | 133114116 | 133140733 | 26618 | 19  | 0.491913  | 0.034196 | 133113550 | 133114682 | 133140153 | 13314131 |
| 103 NA18504 | [2515685 chr2 | 2 | 146694143 | 146710744 | 16602 | 17  | 0.927943  | 0.04485  | 146688620 | 146697098 | 146710557 | 14671093 |
| 104 NA18504 | [2515685 chr2 | 2 | 153495548 | 153499409 | 3862  | 2   | 0.942515  | 0.129888 | 153484545 | 153498503 | 153498846 | 15349997 |
| 105 NA18504 | [2515685 chr2 | 2 | 153622711 | 153625256 | 2546  | 3   | 1.004672  | 0.095728 | 153621175 | 153624247 | 153625088 | 15362542 |
| 106 NA18504 | [2515685 chr2 | 2 | 179342191 | 179354090 | 11900 | 16  | -0.480099 | 0.036512 | 179341856 | 179342527 | 179353696 | 17935448 |
| 107 NA18504 | [2515685 chr2 | 2 | 184427490 | 184430408 | 2919  | 6   | -0.894311 | 0.077499 | 184427146 | 184427835 | 184430193 | 18443062 |
| 108 NA18504 | [2515685 chr2 | 2 | 189394371 | 189406202 | 11832 | 9   | -0.75739  | 0.056415 | 189393190 | 189395553 | 189403901 | 18940850 |

|             |               |   |           |           |        |     |           |          |           |           |           |          |
|-------------|---------------|---|-----------|-----------|--------|-----|-----------|----------|-----------|-----------|-----------|----------|
| 109 NA18504 | [2515685 chr2 | 2 | 208176479 | 208184457 | 7979   | 7   | 0.913453  | 0.062865 | 208176093 | 208176865 | 208183930 | 20818498 |
| 110 NA18504 | [2515685 chr2 | 2 | 228717927 | 228730812 | 12886  | 3   | -0.676832 | 0.082576 | 228715615 | 228720239 | 228730139 | 22873148 |
| 111 NA18504 | [2515685 chr2 | 2 | 232512469 | 232537143 | 24675  | 6   | -0.809399 | 0.049696 | 232511142 | 232513796 | 232534243 | 23254004 |
| 112 NA18504 | [2515685 chr2 | 2 | 242664580 | 242668683 | 4104   | 10  | 0.962352  | 0.039747 | 242664284 | 242664877 | 242668532 | 24266883 |
| 113 NA18504 | [2515685 chr3 | 3 | 204650    | 209394    | 4745   | 4   | 0.959136  | 0.079181 | 202918    | 206383    | 209009    | 209775   |
| 114 NA18504 | [2515685 chr3 | 3 | 1757211   | 1765710   | 8500   | 2   | 0.930037  | 0.123736 | 1756096   | 1758327   | 1762058   | 179730   |
| 115 NA18504 | [2515685 chr3 | 3 | 16213841  | 16216543  | 2703   | 2   | -0.986453 | 0.110511 | 16213419  | 16214264  | 16215641  | 1621744  |
| 116 NA18504 | [2515685 chr3 | 3 | 24804494  | 24806662  | 2169   | 2   | -0.60837  | 0.121236 | 24804250  | 24804739  | 24805762  | 2480756  |
| 117 NA18504 | [2515685 chr3 | 3 | 76273103  | 76275925  | 2823   | 3   | -0.697192 | 0.092523 | 76272721  | 76273485  | 76274835  | 7627701  |
| 118 NA18504 | [2515685 chr3 | 3 | 107702626 | 107705435 | 2810   | 4   | 0.504264  | 0.081398 | 107702453 | 107702799 | 107704855 | 10770601 |
| 119 NA18504 | [2515685 chr3 | 3 | 116139491 | 116150626 | 11136  | 12  | -0.915604 | 0.047285 | 116137943 | 116141040 | 116146974 | 11615548 |
| 120 NA18504 | [2515685 chr3 | 3 | 131270140 | 131276438 | 6299   | 3   | -0.699686 | 0.11476  | 131269235 | 131271046 | 131272786 | 13128032 |
| 121 NA18504 | [2515685 chr3 | 3 | 139287057 | 139289507 | 2451   | 2   | 1.335666  | 0.150987 | 139286041 | 139288073 | 139289200 | 13928981 |
| 122 NA18504 | [2515685 chr3 | 3 | 149675194 | 149676627 | 1434   | 2   | 0.436996  | 0.086741 | 149675023 | 149675366 | 149676452 | 14967680 |
| 123 NA18504 | [2515685 chr3 | 3 | 163994592 | 164106273 | 111682 | 104 | 3.215186  | 0.031914 | 163993392 | 163995793 | 164106029 | 16410651 |
| 124 NA18504 | [2515685 chr3 | 3 | 164106273 | 164108502 | 2230   | 2   | 0.757084  | 0.121104 | 164106029 | 164106517 | 164108018 | 16410898 |
| 125 NA18504 | [2515685 chr3 | 3 | 164200660 | 164205886 | 5227   | 5   | -4.038676 | 0.192378 | 164200187 | 164201133 | 164204674 | 16420709 |
| 126 NA18504 | [2515685 chr3 | 3 | 164228031 | 164230706 | 2676   | 4   | 0.429429  | 0.072257 | 164227023 | 164229039 | 164230311 | 16423110 |
| 127 NA18504 | [2515685 chr3 | 3 | 174689845 | 174701796 | 11952  | 8   | -0.685302 | 0.055048 | 174687213 | 174692478 | 174701514 | 17470207 |
| 128 NA18504 | [2515685 chr3 | 3 | 176561952 | 176567506 | 5555   | 5   | -0.928954 | 0.080806 | 176560250 | 176563654 | 176565991 | 17656902 |
| 129 NA18504 | [2515685 chr3 | 3 | 187988801 | 187992508 | 3708   | 4   | -0.591448 | 0.095015 | 187988581 | 187989021 | 187992275 | 18799274 |
| 130 NA18504 | [2515685 chr3 | 3 | 190846156 | 190852181 | 6026   | 4   | -5.193939 | 0.199595 | 190845504 | 190846809 | 190850598 | 19085376 |
| 131 NA18504 | [2515685 chr3 | 3 | 191219813 | 191223326 | 3514   | 4   | 0.85361   | 0.083083 | 191219291 | 191220336 | 191222918 | 19122373 |
| 132 NA18504 | [2515685 chr3 | 3 | 192547312 | 192554331 | 7020   | 10  | 0.942187  | 0.054274 | 192546950 | 192547674 | 192554127 | 19255453 |
| 133 NA18504 | [2515685 chr3 | 3 | 194357854 | 194368035 | 10182  | 12  | 2.952983  | 0.085155 | 194357665 | 194358044 | 194367817 | 19436825 |
| 134 NA18504 | [2515685 chr3 | 3 | 196767188 | 196879796 | 112609 | 21  | -0.250384 | 0.030382 | 196766868 | 196767509 | 196879715 | 19687987 |
| 135 NA18504 | [2515685 chr3 | 3 | 196879796 | 196967691 | 87896  | 95  | -0.601115 | 0.015698 | 196879715 | 196879878 | 196967336 | 19696804 |
| 136 NA18504 | [2515685 chr3 | 3 | 196991681 | 196993357 | 1677   | 7   | -0.381872 | 0.062635 | 196991423 | 196991939 | 196993124 | 19699359 |
| 137 NA18504 | [2515685 chr3 | 3 | 198422794 | 198427408 | 4615   | 2   | 1.022587  | 0.140917 | 198422381 | 198423207 | 198423959 | 19843085 |
| 138 NA18504 | [2515685 chr3 | 3 | 198651295 | 198653980 | 2686   | 13  | 0.346621  | 0.038704 | 198651255 | 198651335 | 198653743 | 19865421 |
| 139 NA18504 | [2515685 chr3 | 3 | 198674426 | 198675470 | 1045   | 6   | -0.647699 | 0.051826 | 198674161 | 198674692 | 198674903 | 19867603 |
| 140 NA18504 | [2515685 chr3 | 3 | 198823618 | 198882515 | 58898  | 66  | -0.312037 | 0.017746 | 198823303 | 198823933 | 198882172 | 19888285 |
| 141 NA18504 | [2515685 chr3 | 3 | 199313925 | 199321616 | 7692   | 16  | -0.537547 | 0.033372 | 199313515 | 199314336 | 199321283 | 19932194 |
| 142 NA18504 | [2515685 chr4 | 4 | 728045    | 731845    | 3801   | 2   | 0.603245  | 0.100831 | 727736    | 728355    | 731532    | 732155   |
| 143 NA18504 | [2515685 chr4 | 4 | 3601701   | 3604272   | 2572   | 7   | -0.313399 | 0.059115 | 3601014   | 3602388   | 3603866   | 3604675  |
| 144 NA18504 | [2515685 chr4 | 4 | 3714193   | 3715251   | 1059   | 2   | 0.740063  | 0.116767 | 3713862   | 3714524   | 3714881   | 3715627  |
| 145 NA18504 | [2515685 chr4 | 4 | 3906895   | 3909675   | 2781   | 3   | -0.650841 | 0.09497  | 3906487   | 3907303   | 3909318   | 3910032  |
| 146 NA18504 | [2515685 chr4 | 4 | 8998177   | 9046719   | 48543  | 87  | 1.258645  | 0.013123 | 8850774   | 9001243   | 9046129   | 9047305  |
| 147 NA18504 | [2515685 chr4 | 4 | 9299469   | 9308037   | 8569   | 6   | -0.620305 | 0.066149 | 9295439   | 9302535   | 9306599   | 9309476  |
| 148 NA18504 | [2515685 chr4 | 4 | 9812346   | 9813108   | 763    | 33  | 0.427601  | 0.020142 | 9812284   | 9812408   | 9812952   | 9813265  |
| 149 NA18504 | [2515685 chr4 | 4 | 15398208  | 15400310  | 2103   | 2   | -0.500674 | 0.089687 | 15397612  | 15398805  | 15399770  | 15400857 |
| 150 NA18504 | [2515685 chr4 | 4 | 21045633  | 21053532  | 7900   | 8   | -0.872906 | 0.05629  | 21045231  | 21046035  | 21053115  | 21053951 |
| 151 NA18504 | [2515685 chr4 | 4 | 26120120  | 26130599  | 10480  | 6   | -0.72805  | 0.064415 | 26118533  | 26121707  | 26130148  | 26131057 |
| 152 NA18504 | [2515685 chr4 | 4 | 34174420  | 34175437  | 1018   | 2   | -0.752685 | 0.116618 | 34174211  | 34174630  | 34175229  | 34175641 |
| 153 NA18504 | [2515685 chr4 | 4 | 34602797  | 34650994  | 48198  | 44  | 0.838369  | 0.024179 | 34601994  | 34603600  | 34649535  | 3465245  |
| 154 NA18504 | [2515685 chr4 | 4 | 40436102  | 40438263  | 2162   | 3   | -0.445139 | 0.076241 | 40435850  | 40436354  | 40438033  | 4043849  |
| 155 NA18504 | [2515685 chr4 | 4 | 42543240  | 42546856  | 3617   | 2   | 0.593906  | 0.098523 | 42538590  | 42546306  | 42546636  | 42547071 |
| 156 NA18504 | [2515685 chr4 | 4 | 49119758  | 49361409  | 241652 | 282 | 0.337157  | 0.007925 | 49117775  | 49121741  | 49359431  | 4936338  |
| 157 NA18504 | [2515685 chr4 | 4 | 57377032  | 57379666  | 2635   | 2   | -0.759031 | 0.118144 | 57375792  | 57378273  | 57379248  | 5738008  |
| 158 NA18504 | [2515685 chr4 | 4 | 61071090  | 61072115  | 1026   | 2   | 0.660774  | 0.116484 | 61070883  | 61071298  | 61071891  | 6107233  |
| 159 NA18504 | [2515685 chr4 | 4 | 61688035  | 61689491  | 1457   | 2   | 1.023895  | 0.138484 | 61687730  | 61688341  | 61689282  | 6168970  |
| 160 NA18504 | [2515685 chr4 | 4 | 69202095  | 69203228  | 1134   | 2   | 0.602003  | 0.116278 | 69201955  | 69202236  | 69202934  | 6920352  |
| 161 NA18504 | [2515685 chr4 | 4 | 69203228  | 69319814  | 116587 | 70  | 1.225351  | 0.024077 | 69202934  | 69203523  | 69319569  | 6932005  |
| 162 NA18504 | [2515685 chr4 | 4 | 69319814  | 69365270  | 45457  | 44  | 0.344797  | 0.019114 | 69319569  | 69320059  | 69365129  | 6936541  |
| 163 NA18504 | [2515685 chr4 | 4 | 69671789  | 69717280  | 45492  | 53  | 0.291043  | 0.018002 | 69671604  | 69671975  | 69717139  | 6971742  |

|             |               |   |           |           |        |     |           |          |           |           |           |          |
|-------------|---------------|---|-----------|-----------|--------|-----|-----------|----------|-----------|-----------|-----------|----------|
| 164 NA18504 | [2515685 chr4 | 4 | 70288567  | 70289900  | 1334   | 3   | -0.535879 | 0.085569 | 70288305  | 70288829  | 70289725  | 7029007! |
| 165 NA18504 | [2515685 chr4 | 4 | 70305190  | 70324924  | 19735  | 18  | -0.566371 | 0.015394 | 70304868  | 70305512  | 70324680  | 7032516! |
| 166 NA18504 | [2515685 chr4 | 4 | 70327726  | 70416062  | 88337  | 88  | -0.566371 | 0.015394 | 70327333  | 70328119  | 70415760  | 7041636! |
| 167 NA18504 | [2515685 chr4 | 4 | 103100636 | 103102684 | 2049   | 2   | 0.453222  | 0.08868  | 103100355 | 103100918 | 103101957 | 1031034! |
| 168 NA18504 | [2515685 chr4 | 4 | 115534210 | 115541546 | 7337   | 9   | -3.513349 | 0.109119 | 115530015 | 115537276 | 115539984 | 11554310 |
| 169 NA18504 | [2515685 chr4 | 4 | 115865203 | 115869481 | 4279   | 3   | -0.789424 | 0.098723 | 115864913 | 115865494 | 115866415 | 11587556 |
| 170 NA18504 | [2515685 chr4 | 4 | 132848421 | 132851466 | 3046   | 4   | -0.774656 | 0.080395 | 132847980 | 132848862 | 132851018 | 13285191 |
| 171 NA18504 | [2515685 chr4 | 4 | 133027290 | 133038452 | 11163  | 7   | 0.353808  | 0.043734 | 133027146 | 133027435 | 133037357 | 13303954 |
| 172 NA18504 | [2515685 chr4 | 4 | 138537751 | 138549906 | 12156  | 14  | 1.034515  | 0.045904 | 138537443 | 138538059 | 138547414 | 13855239 |
| 173 NA18504 | [2515685 chr4 | 4 | 142588136 | 142590500 | 2365   | 4   | -0.730719 | 0.079353 | 142587774 | 142588498 | 142590303 | 14259069 |
| 174 NA18504 | [2515685 chr4 | 4 | 162237272 | 162242562 | 5291   | 8   | 1.069332  | 0.055217 | 162236487 | 162238058 | 162242381 | 16224274 |
| 175 NA18504 | [2515685 chr4 | 4 | 162806038 | 162809269 | 3232   | 3   | 0.943666  | 0.084132 | 162804872 | 162807204 | 162808734 | 16280980 |
| 176 NA18504 | [2515685 chr4 | 4 | 169184442 | 169368370 | 183929 | 162 | 0.865896  | 0.012327 | 169184090 | 169184794 | 169366713 | 16937002 |
| 177 NA18504 | [2515685 chr4 | 4 | 172750241 | 172755216 | 4976   | 2   | 0.903811  | 0.123873 | 172748887 | 172751596 | 172753256 | 17275717 |
| 178 NA18504 | [2515685 chr4 | 4 | 185532106 | 185534552 | 2447   | 3   | 0.70306   | 0.096384 | 185531516 | 185532696 | 185534150 | 18553495 |
| 179 NA18504 | [2515685 chr4 | 4 | 185535274 | 185544849 | 9576   | 9   | 1.028386  | 0.053358 | 185534955 | 185535593 | 185543276 | 18554642 |
| 180 NA18504 | [2515685 chr4 | 4 | 186816666 | 186819359 | 2694   | 4   | 5.374594  | 0.211981 | 186816420 | 186816912 | 186819049 | 18681967 |
| 181 NA18504 | [2515685 chr4 | 4 | 187728494 | 187732907 | 4414   | 15  | 2.206016  | 0.054721 | 187728193 | 187728795 | 187732541 | 18773327 |
| 182 NA18504 | [2515685 chr4 | 4 | 188255523 | 188269680 | 14158  | 235 | 1.094406  | 0.009529 | 188255215 | 188255831 | 188269403 | 18826995 |
| 183 NA18504 | [2515685 chr4 | 4 | 190528602 | 190533163 | 4562   | 21  | -3.450347 | 0.055778 | 190528058 | 190529146 | 190531664 | 19053466 |
| 184 NA18504 | [2515685 chr4 | 4 | 190767346 | 190773178 | 5833   | 5   | -0.76742  | 0.072044 | 190765430 | 190769263 | 190772764 | 19077359 |
| 185 NA18504 | [2515685 chr5 | 5 | 318840    | 321498    | 2659   | 3   | -0.667682 | 0.089079 | 3184400   | 319280    | 321104    | 321895   |
| 186 NA18504 | [2515685 chr5 | 5 | 743980    | 799580    | 55601  | 35  | 0.427666  | 0.012078 | 743336    | 744625    | 799346    | 799814   |
| 187 NA18504 | [2515685 chr5 | 5 | 805635    | 892859    | 87225  | 84  | 0.427666  | 0.012078 | 805274    | 805997    | 892653    | 893066   |
| 188 NA18504 | [2515685 chr5 | 5 | 896567    | 901723    | 5157   | 8   | 0.427666  | 0.012078 | 896470    | 896664    | 901319    | 902127   |
| 189 NA18504 | [2515685 chr5 | 5 | 1075284   | 1079920   | 4637   | 24  | 0.742724  | 0.027585 | 1074709   | 1075859   | 1079566   | 108027!  |
| 190 NA18504 | [2515685 chr5 | 5 | 1223248   | 1223930   | 683    | 5   | 0.823426  | 0.055347 | 1223057   | 1223439   | 1223854   | 122400!  |
| 191 NA18504 | [2515685 chr5 | 5 | 1624425   | 1686131   | 61707  | 21  | -0.258757 | 0.032044 | 1597428   | 1627616   | 1685890   | 168637!  |
| 192 NA18504 | [2515685 chr5 | 5 | 17515674  | 17525104  | 9431   | 7   | -0.678637 | 0.057208 | 17510191  | 17518865  | 17523994  | 1752621! |
| 193 NA18504 | [2515685 chr5 | 5 | 17570617  | 17643104  | 72488  | 331 | 0.254272  | 0.006915 | 17570551  | 17570684  | 17642455  | 1764375! |
| 194 NA18504 | [2515685 chr5 | 5 | 17664339  | 17667407  | 3069   | 7   | 0.311374  | 0.050474 | 17663984  | 17664695  | 17667174  | 1766764! |
| 195 NA18504 | [2515685 chr5 | 5 | 19410747  | 19412172  | 1426   | 3   | 0.870737  | 0.087517 | 19410189  | 19411305  | 19411980  | 1941236! |
| 196 NA18504 | [2515685 chr5 | 5 | 21411784  | 21413344  | 1561   | 2   | -0.865702 | 0.136938 | 21410898  | 21412670  | 21413061  | 2141362! |
| 197 NA18504 | [2515685 chr5 | 5 | 21483394  | 21488147  | 4754   | 4   | -0.838645 | 0.073165 | 21480817  | 21485972  | 21487855  | 2148843! |
| 198 NA18504 | [2515685 chr5 | 5 | 21870268  | 21873278  | 3011   | 3   | -0.895706 | 0.106096 | 21869771  | 21870766  | 21872820  | 2187373! |
| 199 NA18504 | [2515685 chr5 | 5 | 34243738  | 34244789  | 1052   | 3   | 0.373018  | 0.071054 | 34243371  | 34244105  | 34244564  | 3424501! |
| 200 NA18504 | [2515685 chr5 | 5 | 68865200  | 68890040  | 24841  | 56  | 0.520345  | 0.011544 | 68864770  | 68865630  | 68889779  | 6889030! |
| 201 NA18504 | [2515685 chr5 | 5 | 68891974  | 68946635  | 54662  | 89  | 0.520345  | 0.011544 | 68891826  | 68892123  | 68946473  | 6894679! |
| 202 NA18504 | [2515685 chr5 | 5 | 69043023  | 69175404  | 132382 | 324 | 0.251547  | 0.006888 | 69043005  | 69043042  | 69175386  | 6917542! |
| 203 NA18504 | [2515685 chr5 | 5 | 69403829  | 69411352  | 7524   | 7   | 0.340647  | 0.023521 | 69403501  | 69404157  | 69410702  | 6941200! |
| 204 NA18504 | [2515685 chr5 | 5 | 69426208  | 69433946  | 7739   | 14  | 0.340647  | 0.023521 | 69425915  | 69426501  | 69433170  | 6943472! |
| 205 NA18504 | [2515685 chr5 | 5 | 69622755  | 69805874  | 183120 | 379 | 0.282606  | 0.006652 | 69622737  | 69622774  | 69805774  | 6980597! |
| 206 NA18504 | [2515685 chr5 | 5 | 69936077  | 69936883  | 807    | 3   | 0.602725  | 0.079939 | 69936001  | 69936153  | 69936770  | 6993699! |
| 207 NA18504 | [2515685 chr5 | 5 | 70280260  | 70286789  | 6530   | 6   | 0.530967  | 0.050179 | 70279582  | 70280938  | 70286122  | 7028745! |
| 208 NA18504 | [2515685 chr5 | 5 | 70303574  | 70309397  | 5824   | 10  | 0.541104  | 0.038608 | 70303355  | 70303794  | 70308614  | 7031018! |
| 209 NA18504 | [2515685 chr5 | 5 | 70334592  | 70340791  | 6200   | 13  | 0.324662  | 0.036656 | 70334491  | 70334694  | 70340046  | 7034153! |
| 210 NA18504 | [2515685 chr5 | 5 | 70340791  | 70346521  | 5731   | 7   | -0.798857 | 0.064039 | 70340046  | 70341537  | 70346074  | 7034696! |
| 211 NA18504 | [2515685 chr5 | 5 | 70346521  | 70426554  | 80034  | 138 | 0.540264  | 0.012139 | 70346074  | 70346969  | 70425419  | 7042768! |
| 212 NA18504 | [2515685 chr5 | 5 | 81459214  | 81466054  | 6841   | 2   | -1.421322 | 0.123386 | 81455614  | 81462405  | 81462863  | 8147028! |
| 213 NA18504 | [2515685 chr5 | 5 | 97427204  | 97428353  | 1150   | 2   | 0.983952  | 0.117444 | 97426913  | 97427496  | 97428177  | 9742852! |
| 214 NA18504 | [2515685 chr5 | 5 | 99408801  | 99419037  | 10237  | 14  | -0.488732 | 0.03975  | 99408605  | 99408997  | 99418328  | 9941974! |
| 215 NA18504 | [2515685 chr5 | 5 | 109880391 | 109881914 | 1524   | 2   | 0.878073  | 0.116095 | 109879999 | 109880783 | 109881640 | 10988218 |
| 216 NA18504 | [2515685 chr5 | 5 | 122649189 | 122651412 | 2224   | 3   | 0.562677  | 0.089088 | 122648933 | 122649446 | 122650032 | 12265279 |
| 217 NA18504 | [2515685 chr5 | 5 | 137835848 | 137837438 | 1591   | 2   | 0.851787  | 0.116774 | 137835611 | 137836085 | 137836512 | 13783836 |
| 218 NA18504 | [2515685 chr5 | 5 | 137838768 | 137844134 | 5367   | 4   | 0.829227  | 0.083271 | 137838364 | 137839173 | 137843310 | 13784495 |

|             |               |   |           |           |        |     |           |          |           |           |           |          |
|-------------|---------------|---|-----------|-----------|--------|-----|-----------|----------|-----------|-----------|-----------|----------|
| 219 NA18504 | [2515685 chr5 | 5 | 140203081 | 140218928 | 15848  | 20  | 2.136587  | 0.053175 | 140202344 | 140203819 | 140218508 | 14021934 |
| 220 NA18504 | [2515685 chr5 | 5 | 150183322 | 150203801 | 20480  | 11  | -0.688118 | 0.047614 | 150181427 | 150185218 | 150203451 | 15020415 |
| 221 NA18504 | [2515685 chr5 | 5 | 171469627 | 171474726 | 5100   | 7   | -0.259391 | 0.050249 | 171469426 | 171469828 | 171474434 | 17147501 |
| 222 NA18504 | [2515685 chr5 | 5 | 171486025 | 171487210 | 1186   | 2   | -0.498682 | 0.093872 | 171485650 | 171486401 | 171486955 | 17148746 |
| 223 NA18504 | [2515685 chr5 | 5 | 175278638 | 175283031 | 4394   | 4   | -0.413452 | 0.062368 | 175278310 | 175278967 | 175281697 | 17528436 |
| 224 NA18504 | [2515685 chr5 | 5 | 178994494 | 178994971 | 478    | 2   | -0.609809 | 0.093926 | 178994223 | 178994766 | 178994768 | 17899517 |
| 225 NA18504 | [2515685 chr5 | 5 | 179016786 | 179017263 | 478    | 2   | -0.609808 | 0.093926 | 179016582 | 179016990 | 179016992 | 17901753 |
| 226 NA18504 | [2515685 chr5 | 5 | 180309236 | 180363417 | 54182  | 53  | 0.58391   | 0.020932 | 180309103 | 180309370 | 180363120 | 18036371 |
| 227 NA18504 | [2515685 chr6 | 6 | 3163      | 21917     | 18755  | 7   | 0.608953  | 0.054873 | 1         | 6325      | 21741     | 22093    |
| 228 NA18504 | [2515685 chr6 | 6 | 57835     | 57987     | 153    | 2   | 0.787871  | 0.118756 | 57748     | 57922     | 57922     | 58052    |
| 229 NA18504 | [2515685 chr6 | 6 | 201823    | 324395    | 122573 | 125 | 0.349654  | 0.013147 | 201415    | 202232    | 323926    | 324865   |
| 230 NA18504 | [2515685 chr6 | 6 | 26847749  | 26850078  | 2330   | 2   | 0.680308  | 0.112626 | 26846249  | 26849250  | 26849750  | 2685040  |
| 231 NA18504 | [2515685 chr6 | 6 | 26990378  | 26991069  | 692    | 2   | 0.490655  | 0.094727 | 26989956  | 26990800  | 26990902  | 26991231 |
| 232 NA18504 | [2515685 chr6 | 6 | 29958572  | 30011802  | 53231  | 50  | 0.401209  | 0.022641 | 29957670  | 29959474  | 30011083  | 3001252  |
| 233 NA18504 | [2515685 chr6 | 6 | 31387065  | 31419859  | 32795  | 16  | -0.769922 | 0.041522 | 31386395  | 31387736  | 31418034  | 3142168  |
| 234 NA18504 | [2515685 chr6 | 6 | 32557476  | 32558865  | 1390   | 3   | 0.611371  | 0.09405  | 32557305  | 32557647  | 32558698  | 3255903  |
| 235 NA18504 | [2515685 chr6 | 6 | 32589957  | 32591244  | 1288   | 2   | -0.964723 | 0.146391 | 32589338  | 32590576  | 32591086  | 3259140  |
| 236 NA18504 | [2515685 chr6 | 6 | 32596109  | 32604629  | 8521   | 12  | -0.335916 | 0.05808  | 32595932  | 32596286  | 32604335  | 3260492  |
| 237 NA18504 | [2515685 chr6 | 6 | 32605125  | 32605958  | 834    | 2   | -1.3353   | 0.133168 | 32604923  | 32605328  | 32605760  | 3260615  |
| 238 NA18504 | [2515685 chr6 | 6 | 32605958  | 32617049  | 11092  | 7   | -0.304128 | 0.053439 | 32605760  | 32606156  | 32613543  | 3262657  |
| 239 NA18504 | [2515685 chr6 | 6 | 32630637  | 32631716  | 1080   | 2   | 1.860248  | 0.196345 | 32630364  | 32630911  | 32631343  | 3263208  |
| 240 NA18504 | [2515685 chr6 | 6 | 32632349  | 32633889  | 1541   | 3   | 2.414125  | 0.022837 | 32632089  | 32632610  | 32633714  | 32633406 |
| 241 NA18504 | [2515685 chr6 | 6 | 32646910  | 32650756  | 3847   | 2   | 1.061501  | 0.144229 | 32645703  | 32648118  | 32650365  | 3265114  |
| 242 NA18504 | [2515685 chr6 | 6 | 32650756  | 32652938  | 2183   | 2   | 4.18188   | 0.375809 | 32650365  | 32651147  | 32652689  | 3265318  |
| 243 NA18504 | [2515685 chr6 | 6 | 32653862  | 32655482  | 1621   | 3   | 1.38914   | 0.148568 | 32653679  | 32654046  | 32654980  | 3265598  |
| 244 NA18504 | [2515685 chr6 | 6 | 32658787  | 32659901  | 1115   | 2   | 2.630116  | 0.178077 | 32658616  | 32658959  | 32659691  | 3266011  |
| 245 NA18504 | [2515685 chr6 | 6 | 32672888  | 32680751  | 7864   | 7   | 0.620856  | 0.061612 | 32672612  | 32673164  | 32680547  | 3268095  |
| 246 NA18504 | [2515685 chr6 | 6 | 32702716  | 32705737  | 3022   | 3   | -1.406627 | 0.086372 | 32702285  | 32703148  | 32704019  | 3270745  |
| 247 NA18504 | [2515685 chr6 | 6 | 32712337  | 32762917  | 50581  | 48  | 0.424453  | 0.024387 | 32712193  | 32712482  | 32762733  | 3276310  |
| 248 NA18504 | [2515685 chr6 | 6 | 32801824  | 32808170  | 6347   | 7   | 0.32607   | 0.05819  | 32801628  | 32802021  | 32807533  | 3280880  |
| 249 NA18504 | [2515685 chr6 | 6 | 35862833  | 35879904  | 17072  | 16  | 0.405906  | 0.037241 | 35862530  | 35863136  | 35879292  | 3588051  |
| 250 NA18504 | [2515685 chr6 | 6 | 47426244  | 47427505  | 1262   | 2   | 0.668556  | 0.103166 | 47425978  | 47426511  | 47427046  | 4742796  |
| 251 NA18504 | [2515685 chr6 | 6 | 54036900  | 54042384  | 5485   | 5   | 4.781153  | 0.194143 | 54036573  | 54037227  | 54041771  | 5404299  |
| 252 NA18504 | [2515685 chr6 | 6 | 58296313  | 58298932  | 2620   | 4   | -0.421024 | 0.081371 | 58296123  | 58296504  | 58298725  | 5829914  |
| 253 NA18504 | [2515685 chr6 | 6 | 77495034  | 77500423  | 5390   | 8   | 0.943146  | 0.06638  | 77493568  | 77496500  | 77500200  | 7750064  |
| 254 NA18504 | [2515685 chr6 | 6 | 93631413  | 93637196  | 5784   | 6   | -0.911715 | 0.069236 | 93630862  | 93631964  | 93635493  | 9363889  |
| 255 NA18504 | [2515685 chr6 | 6 | 102041093 | 102046055 | 4963   | 6   | -0.879205 | 0.075031 | 102040642 | 102041544 | 102045198 | 10204691 |
| 256 NA18504 | [2515685 chr6 | 6 | 103844685 | 103871201 | 26517  | 16  | 3.18262   | 0.083081 | 103844347 | 103845023 | 103868241 | 10387416 |
| 257 NA18504 | [2515685 chr6 | 6 | 115422387 | 115424321 | 1935   | 2   | -1.229755 | 0.173483 | 115421781 | 115422994 | 115423780 | 11542486 |
| 258 NA18504 | [2515685 chr6 | 6 | 115446833 | 115450846 | 4014   | 3   | -0.566727 | 0.091787 | 115446601 | 115447066 | 115450464 | 11545122 |
| 259 NA18504 | [2515685 chr6 | 6 | 120671191 | 120671916 | 726    | 2   | 1.280267  | 0.116377 | 120670696 | 120671686 | 120671725 | 12067210 |
| 260 NA18504 | [2515685 chr6 | 6 | 147975767 | 147979407 | 3641   | 3   | -0.477737 | 0.087271 | 147975390 | 147976145 | 147978550 | 14798026 |
| 261 NA18504 | [2515685 chr6 | 6 | 167513600 | 167514710 | 1111   | 2   | -1.014202 | 0.136181 | 167513351 | 167513850 | 167514379 | 16751504 |
| 262 NA18504 | [2515685 chr6 | 6 | 167769371 | 167777997 | 8627   | 17  | 0.256247  | 0.036373 | 167768857 | 167769886 | 167777289 | 16777870 |
| 263 NA18504 | [2515685 chr6 | 6 | 168453011 | 168456762 | 3752   | 3   | 0.484231  | 0.079762 | 168452611 | 168453411 | 168456200 | 16845732 |
| 264 NA18504 | [2515685 chr6 | 6 | 168780035 | 168781989 | 1955   | 4   | -0.466974 | 0.072392 | 168779504 | 168780567 | 168781555 | 16878242 |
| 265 NA18504 | [2515685 chr6 | 6 | 169340171 | 169347270 | 7100   | 30  | 1.20531   | 0.027516 | 169335703 | 169343677 | 169347209 | 16934733 |
| 266 NA18504 | [2515685 chr6 | 6 | 170570108 | 170571491 | 1384   | 8   | -0.547165 | 0.057817 | 170569621 | 170570596 | 170571251 | 17057173 |
| 267 NA18504 | [2515685 chr6 | 6 | 170603879 | 170604666 | 788    | 2   | -1.379708 | 0.108183 | 170603541 | 170604217 | 170604339 | 17060499 |
| 268 NA18504 | [2515685 chr6 | 6 | 170625506 | 170627028 | 1523   | 3   | 1.926016  | 0.124305 | 170625015 | 170625997 | 170626579 | 17062747 |
| 269 NA18504 | [2515685 chr6 | 6 | 170682344 | 170694780 | 12437  | 31  | -0.275099 | 0.025333 | 170682021 | 170682667 | 170694493 | 17069506 |
| 270 NA18504 | [2515685 chr6 | 6 | 170860192 | 170860344 | 153    | 2   | 0.787871  | 0.118756 | 170860127 | 170860257 | 170860257 | 17086043 |
| 271 NA18504 | [2515685 chr7 | 7 | 1295972   | 1304843   | 8872   | 12  | -0.258062 | 0.041399 | 1295674   | 1296270   | 1304174   | 130551   |
| 272 NA18504 | [2515685 chr7 | 7 | 3384111   | 3392457   | 8347   | 8   | 0.930488  | 0.057461 | 3383451   | 3384772   | 3390107   | 339561   |
| 273 NA18504 | [2515685 chr7 | 7 | 29487549  | 29491761  | 4213   | 3   | 0.406858  | 0.075387 | 29487074  | 29488025  | 29491107  | 2949241  |

|             |               |   |           |           |        |     |           |          |           |           |           |          |
|-------------|---------------|---|-----------|-----------|--------|-----|-----------|----------|-----------|-----------|-----------|----------|
| 274 NA18504 | [2515685 chr7 | 7 | 37647977  | 37657849  | 9873   | 2   | -0.528812 | 0.08536  | 37646226  | 37649728  | 37655499  | 37719607 |
| 275 NA18504 | [2515685 chr7 | 7 | 38153374  | 38178711  | 25338  | 29  | -0.317456 | 0.025937 | 38153096  | 38153653  | 38177987  | 38179431 |
| 276 NA18504 | [2515685 chr7 | 7 | 43775620  | 43789873  | 14254  | 17  | 0.397237  | 0.03339  | 43775434  | 43775807  | 43789550  | 43790191 |
| 277 NA18504 | [2515685 chr7 | 7 | 56415683  | 56544240  | 128558 | 4   | -0.648569 | 0.07217  | 56286086  | 56418033  | 56542365  | 56546111 |
| 278 NA18504 | [2515685 chr7 | 7 | 57509632  | 57525746  | 16115  | 18  | -0.263676 | 0.035343 | 57509390  | 57509874  | 57524898  | 57526597 |
| 279 NA18504 | [2515685 chr7 | 7 | 62254472  | 62255088  | 617    | 4   | 0.766195  | 0.075228 | 62254309  | 62254635  | 62254924  | 62255525 |
| 280 NA18504 | [2515685 chr7 | 7 | 62272634  | 62273692  | 1059   | 2   | 0.49068   | 0.090038 | 62272495  | 62272773  | 62272898  | 62274481 |
| 281 NA18504 | [2515685 chr7 | 7 | 62302079  | 62302696  | 618    | 4   | 0.766201  | 0.075229 | 62301915  | 62302243  | 62302533  | 62302851 |
| 282 NA18504 | [2515685 chr7 | 7 | 62670912  | 62684829  | 13918  | 4   | -0.429706 | 0.07364  | 62667763  | 62673262  | 62684608  | 62685051 |
| 283 NA18504 | [2515685 chr7 | 7 | 64028465  | 64046357  | 17893  | 49  | -0.255909 | 0.02021  | 64027806  | 64029125  | 64046143  | 64046571 |
| 284 NA18504 | [2515685 chr7 | 7 | 64053836  | 64079765  | 25930  | 40  | -0.334447 | 0.020464 | 64053642  | 64054030  | 64078845  | 64080681 |
| 285 NA18504 | [2515685 chr7 | 7 | 64429730  | 64455257  | 25528  | 39  | -0.340654 | 0.020762 | 64428756  | 64430705  | 64454989  | 64455521 |
| 286 NA18504 | [2515685 chr7 | 7 | 64463334  | 64481591  | 18258  | 47  | -0.272202 | 0.020612 | 64462999  | 64463669  | 64481417  | 64481761 |
| 287 NA18504 | [2515685 chr7 | 7 | 64538610  | 64590991  | 52382  | 109 | -0.25657  | 0.012787 | 64537873  | 64539348  | 64590084  | 64591891 |
| 288 NA18504 | [2515685 chr7 | 7 | 64690171  | 64725545  | 35375  | 39  | 0.426948  | 0.022765 | 64689761  | 64690582  | 64725209  | 64725881 |
| 289 NA18504 | [2515685 chr7 | 7 | 69866390  | 69869623  | 3234   | 4   | 0.937171  | 0.083142 | 69865412  | 69867368  | 69869269  | 69869971 |
| 290 NA18504 | [2515685 chr7 | 7 | 69869623  | 69871056  | 1434   | 2   | 3.939337  | 0.195427 | 69869269  | 69869978  | 69870420  | 69871691 |
| 291 NA18504 | [2515685 chr7 | 7 | 71858493  | 71859326  | 834    | 2   | -0.508164 | 0.08461  | 71858284  | 71858703  | 71858719  | 71859931 |
| 292 NA18504 | [2515685 chr7 | 7 | 72014016  | 72014871  | 856    | 3   | 0.465859  | 0.070895 | 72013991  | 72014042  | 72014598  | 72015141 |
| 293 NA18504 | [2515685 chr7 | 7 | 72156868  | 72160163  | 3296   | 7   | -0.344912 | 0.051297 | 72156657  | 72157079  | 72160033  | 72160291 |
| 294 NA18504 | [2515685 chr7 | 7 | 73823778  | 73824413  | 636    | 3   | 0.45847   | 0.075806 | 73823755  | 73823801  | 73824363  | 73824461 |
| 295 NA18504 | [2515685 chr7 | 7 | 73917034  | 73918196  | 1163   | 2   | 0.671517  | 0.097813 | 73917029  | 73917040  | 73917270  | 73919121 |
| 296 NA18504 | [2515685 chr7 | 7 | 74096901  | 74097754  | 854    | 3   | 0.465861  | 0.070895 | 74096630  | 74097173  | 74097729  | 74097781 |
| 297 NA18504 | [2515685 chr7 | 7 | 74417518  | 74418680  | 1163   | 2   | 0.671516  | 0.097813 | 74416593  | 74418444  | 74418675  | 74418681 |
| 298 NA18504 | [2515685 chr7 | 7 | 74510928  | 74511943  | 1016   | 4   | 0.442966  | 0.064617 | 74510847  | 74511009  | 74511918  | 74511961 |
| 299 NA18504 | [2515685 chr7 | 7 | 74695370  | 74696139  | 770    | 3   | -0.490569 | 0.074888 | 74695306  | 74695434  | 74695977  | 74696301 |
| 300 NA18504 | [2515685 chr7 | 7 | 75790452  | 75792073  | 1622   | 2   | -0.784888 | 0.114647 | 75790248  | 75790656  | 75791881  | 75792261 |
| 301 NA18504 | [2515685 chr7 | 7 | 92971481  | 92976895  | 5415   | 4   | 0.714881  | 0.085327 | 92971060  | 92971903  | 92975569  | 92978221 |
| 302 NA18504 | [2515685 chr7 | 7 | 97038347  | 97047344  | 8998   | 16  | -0.700446 | 0.040166 | 97032531  | 97040697  | 97046973  | 97047711 |
| 303 NA18504 | [2515685 chr7 | 7 | 99513362  | 99513912  | 551    | 2   | 0.476078  | 0.089705 | 99513133  | 99513592  | 99513623  | 99514201 |
| 304 NA18504 | [2515685 chr7 | 7 | 100202927 | 100203955 | 1029   | 2   | 0.621827  | 0.11013  | 100202569 | 100203285 | 100203714 | 10020419 |
| 305 NA18504 | [2515685 chr7 | 7 | 101718078 | 101771242 | 53165  | 66  | 0.253288  | 0.007235 | 101717515 | 101718641 | 101770895 | 10177159 |
| 306 NA18504 | [2515685 chr7 | 7 | 101778283 | 101870581 | 92299  | 131 | 0.253288  | 0.007235 | 101777850 | 101778717 | 101870234 | 10187092 |
| 307 NA18504 | [2515685 chr7 | 7 | 101877614 | 101926673 | 49060  | 82  | 0.253288  | 0.007235 | 101877186 | 101878042 | 101926197 | 10192715 |
| 308 NA18504 | [2515685 chr7 | 7 | 109034784 | 109048749 | 13966  | 10  | 2.416538  | 0.074035 | 109024063 | 109037134 | 109046953 | 10905054 |
| 309 NA18504 | [2515685 chr7 | 7 | 125639507 | 125644775 | 5269   | 6   | -3.187794 | 0.129369 | 125639054 | 125639961 | 125644046 | 12564550 |
| 310 NA18504 | [2515685 chr7 | 7 | 126369902 | 126375181 | 5280   | 6   | -0.798618 | 0.062518 | 126369503 | 126370302 | 126374771 | 12637559 |
| 311 NA18504 | [2515685 chr7 | 7 | 141496492 | 141505136 | 8645   | 11  | -0.457139 | 0.042329 | 141495918 | 141497066 | 141504428 | 14150584 |
| 312 NA18504 | [2515685 chr7 | 7 | 141505136 | 141521152 | 16017  | 19  | -1.689294 | 0.050444 | 141504428 | 141505844 | 141520892 | 14152141 |
| 313 NA18504 | [2515685 chr7 | 7 | 141521152 | 141526577 | 5426   | 9   | -0.447505 | 0.045548 | 141520892 | 141521412 | 141526109 | 14152704 |
| 314 NA18504 | [2515685 chr7 | 7 | 149285428 | 149287696 | 2269   | 3   | 0.543752  | 0.082138 | 149285181 | 149285676 | 149286346 | 14928904 |
| 315 NA18504 | [2515685 chr7 | 7 | 150109597 | 150116705 | 7109   | 2   | 0.658861  | 0.108509 | 150109015 | 150110179 | 150114749 | 15011866 |
| 316 NA18504 | [2515685 chr7 | 7 | 152948945 | 152951306 | 2362   | 3   | 0.438684  | 0.080807 | 152947501 | 152950389 | 152951051 | 15295156 |
| 317 NA18504 | [2515685 chr7 | 7 | 156976112 | 156978464 | 2353   | 2   | 1.028007  | 0.103591 | 156975812 | 156976413 | 156977896 | 15697903 |
| 318 NA18504 | [2515685 chr7 | 7 | 157023614 | 157027930 | 4317   | 7   | 0.293687  | 0.05448  | 157023242 | 157023987 | 157027451 | 15702840 |
| 319 NA18504 | [2515685 chr7 | 7 | 158617060 | 158624378 | 7319   | 6   | 0.905595  | 0.06721  | 158616763 | 158617357 | 158622028 | 15862672 |
| 320 NA18504 | [2515685 chr8 | 8 | 1328256   | 1343509   | 15254  | 45  | -0.303555 | 0.019655 | 1327688   | 1328824   | 1342795   | 1344224  |
| 321 NA18504 | [2515685 chr8 | 8 | 1394513   | 1413095   | 18583  | 19  | -0.272803 | 0.035587 | 1393955   | 1395072   | 1412598   | 1413592  |
| 322 NA18504 | [2515685 chr8 | 8 | 2238729   | 2253798   | 15070  | 10  | -0.721947 | 0.054758 | 2233839   | 2241488   | 2251039   | 2257521  |
| 323 NA18504 | [2515685 chr8 | 8 | 3885315   | 3887416   | 2102   | 2   | 0.644198  | 0.106075 | 3885089   | 3885542   | 3886275   | 3888551  |
| 324 NA18504 | [2515685 chr8 | 8 | 4110204   | 4112526   | 2323   | 2   | 4.137692  | 0.249362 | 4109692   | 4110717   | 4112031   | 4113022  |
| 325 NA18504 | [2515685 chr8 | 8 | 4150278   | 4152420   | 2143   | 3   | -0.475936 | 0.076619 | 4149769   | 4150787   | 4152120   | 4152721  |
| 326 NA18504 | [2515685 chr8 | 8 | 4985590   | 4989130   | 3541   | 4   | 0.40454   | 0.075539 | 4985107   | 4986074   | 4988850   | 4989411  |
| 327 NA18504 | [2515685 chr8 | 8 | 5582875   | 5594011   | 11137  | 9   | 0.830761  | 0.049463 | 5582615   | 5583135   | 5592820   | 5595203  |
| 328 NA18504 | [2515685 chr8 | 8 | 5951254   | 6006061   | 54808  | 4   | 0.604375  | 0.076918 | 5949893   | 5952616   | 6003726   | 6008391  |

|             |                |    |           |           |         |      |           |          |           |           |           |           |
|-------------|----------------|----|-----------|-----------|---------|------|-----------|----------|-----------|-----------|-----------|-----------|
| 329 NA18504 | [2515685 chr8  | 8  | 7094852   | 7305224   | 210373  | 466  | 0.318347  | 0.003273 | 7092427   | 7097278   | 7304208   | 7306247   |
| 330 NA18504 | [2515685 chr8  | 8  | 7309865   | 7430731   | 120867  | 296  | 0.318347  | 0.003273 | 7309574   | 7310156   | 7430300   | 7431162   |
| 331 NA18504 | [2515685 chr8  | 8  | 7607253   | 7741546   | 134294  | 409  | 0.318347  | 0.003273 | 7606824   | 7607682   | 7741254   | 7741838   |
| 332 NA18504 | [2515685 chr8  | 8  | 7746187   | 7928723   | 182537  | 367  | 0.318347  | 0.003273 | 7745171   | 7747203   | 7928292   | 7929154   |
| 333 NA18504 | [2515685 chr8  | 8  | 12003756  | 12007578  | 3823    | 11   | 0.435678  | 0.038135 | 12003579  | 12003933  | 12007418  | 12007731  |
| 334 NA18504 | [2515685 chr8  | 8  | 12023134  | 12035286  | 12153   | 33   | 1.099422  | 0.028578 | 12022997  | 12023272  | 12034973  | 12035591  |
| 335 NA18504 | [2515685 chr8  | 8  | 12064826  | 12072445  | 7620    | 25   | 0.440213  | 0.025729 | 12064663  | 12064989  | 12072267  | 12072621  |
| 336 NA18504 | [2515685 chr8  | 8  | 12275692  | 12284041  | 8350    | 16   | 0.972911  | 0.037605 | 12275477  | 12275908  | 12283622  | 12284466  |
| 337 NA18504 | [2515685 chr8  | 8  | 12314107  | 12320979  | 6873    | 20   | 0.419494  | 0.028393 | 12313944  | 12314270  | 12320895  | 12321061  |
| 338 NA18504 | [2515685 chr8  | 8  | 13659264  | 13695343  | 36080   | 30   | -0.778726 | 0.033067 | 13658432  | 13660096  | 13694817  | 13695861  |
| 339 NA18504 | [2515685 chr8  | 8  | 16245461  | 16251509  | 6049    | 6    | -0.940616 | 0.071899 | 16245129  | 16245794  | 16250812  | 16252201  |
| 340 NA18504 | [2515685 chr8  | 8  | 17671955  | 17674609  | 2655    | 4    | 0.432957  | 0.073413 | 17671619  | 17672291  | 17674338  | 17674488  |
| 341 NA18504 | [2515685 chr8  | 8  | 20022286  | 20024771  | 2486    | 2    | -1.227489 | 0.133296 | 20021082  | 20023491  | 20024338  | 20025201  |
| 342 NA18504 | [2515685 chr8  | 8  | 21832667  | 21833967  | 1301    | 2    | 0.872775  | 0.107262 | 21832108  | 21833227  | 21833678  | 21834251  |
| 343 NA18504 | [2515685 chr8  | 8  | 32799586  | 32810890  | 11305   | 13   | 2.495186  | 0.087318 | 32799314  | 32799859  | 32810654  | 32811121  |
| 344 NA18504 | [2515685 chr8  | 8  | 39351178  | 39506673  | 155496  | 162  | 0.812495  | 0.013548 | 39350826  | 39351530  | 39505284  | 39508061  |
| 345 NA18504 | [2515685 chr8  | 8  | 39716664  | 39716976  | 313     | 2    | -0.503414 | 0.098998 | 39716554  | 39716775  | 39716857  | 39717091  |
| 346 NA18504 | [2515685 chr8  | 8  | 49081430  | 49084499  | 3070    | 2    | 1.088457  | 0.118108 | 49079497  | 49083364  | 49084089  | 49084911  |
| 347 NA18504 | [2515685 chr8  | 8  | 51248316  | 51249286  | 971     | 2    | 1.00592   | 0.151546 | 51248117  | 51248516  | 51248890  | 51249681  |
| 348 NA18504 | [2515685 chr8  | 8  | 54001807  | 54003115  | 1309    | 3    | -0.7237   | 0.113995 | 54001673  | 54001942  | 54002885  | 54003341  |
| 349 NA18504 | [2515685 chr8  | 8  | 54127460  | 54156416  | 28957   | 21   | -0.800218 | 0.035869 | 54112932  | 541130219 | 54154334  | 54158491  |
| 350 NA18504 | [2515685 chr8  | 8  | 58278355  | 58287850  | 9496    | 8    | 1.054694  | 0.049621 | 58277116  | 58279595  | 58287616  | 58288081  |
| 351 NA18504 | [2515685 chr8  | 8  | 86742169  | 86910255  | 168087  | 99   | 0.622056  | 0.012615 | 86741757  | 86742581  | 86910002  | 86910501  |
| 352 NA18504 | [2515685 chr8  | 8  | 87020698  | 87022896  | 2199    | 3    | -0.56328  | 0.089201 | 87020363  | 87021033  | 87022032  | 87023761  |
| 353 NA18504 | [2515685 chr8  | 8  | 120089066 | 120093851 | 4786    | 3    | -0.83122  | 0.098567 | 120088183 | 120089950 | 120091092 | 120098731 |
| 354 NA18504 | [2515685 chr8  | 8  | 120222655 | 120229952 | 7298    | 6    | 0.882894  | 0.070398 | 120218251 | 120225414 | 120229434 | 120230471 |
| 355 NA18504 | [2515685 chr8  | 8  | 137764285 | 137777276 | 12992   | 13   | -0.891878 | 0.047911 | 137763097 | 137765474 | 137774517 | 137782251 |
| 356 NA18504 | [2515685 chr8  | 8  | 142071432 | 142076235 | 4804    | 6    | 0.580681  | 0.064781 | 142070908 | 142071957 | 142073476 | 142110861 |
| 357 NA18504 | [2515685 chr9  | 9  | 14037     | 25626     | 11590   | 27   | 0.318765  | 0.026952 | 13485     | 14589     | 25486     | 25766     |
| 358 NA18504 | [2515685 chr9  | 9  | 632102    | 637922    | 5821    | 7    | -0.849687 | 0.059799 | 631710    | 632495    | 637447    | 638398    |
| 359 NA18504 | [2515685 chr9  | 9  | 28829210  | 28837137  | 7928    | 9    | -0.832167 | 0.056246 | 28827815  | 28830605  | 28836613  | 28837661  |
| 360 NA18504 | [2515685 chr9  | 9  | 40256984  | 40273449  | 16466   | 34   | -0.361673 | 0.02682  | 40256514  | 40257455  | 40271087  | 40276961  |
| 361 NA18504 | [2515685 chr9  | 9  | 42639862  | 42643779  | 3918    | 8    | -0.264589 | 0.045289 | 42639537  | 42640187  | 42643538  | 42644021  |
| 362 NA18504 | [2515685 chr9  | 9  | 42754727  | 42756705  | 1979    | 3    | -0.386677 | 0.073566 | 42754385  | 42755070  | 42755767  | 42757641  |
| 363 NA18504 | [2515685 chr9  | 9  | 42875403  | 42877381  | 1979    | 3    | -0.386677 | 0.073566 | 42875061  | 42875746  | 42876443  | 42878321  |
| 364 NA18504 | [2515685 chr9  | 9  | 43182772  | 43195894  | 13123   | 25   | -0.380408 | 0.030381 | 43179223  | 43185134  | 43195641  | 43196141  |
| 365 NA18504 | [2515685 chr9  | 9  | 43714906  | 43718811  | 3906    | 7    | -0.27149  | 0.047147 | 43714582  | 43715231  | 43718570  | 43719051  |
| 366 NA18504 | [2515685 chr9  | 9  | 43808781  | 43814560  | 5780    | 11   | 0.256715  | 0.045627 | 43808388  | 43809175  | 43814465  | 43814651  |
| 367 NA18504 | [2515685 chr9  | 9  | 44153357  | 44153558  | 202     | 2    | -0.666676 | 0.102231 | 44153348  | 44153366  | 44153395  | 44153721  |
| 368 NA18504 | [2515685 chr9  | 9  | 65309543  | 65309744  | 202     | 2    | -0.66668  | 0.102231 | 65309534  | 65309552  | 65309581  | 65309901  |
| 369 NA18504 | [2515685 chr9  | 9  | 66230851  | 66231052  | 202     | 2    | -0.666676 | 0.102231 | 66230842  | 66230860  | 66230889  | 66231211  |
| 370 NA18504 | [2515685 chr9  | 9  | 68200977  | 68201915  | 939     | 2    | 0.525625  | 0.093745 | 68200578  | 68201376  | 68201730  | 68202101  |
| 371 NA18504 | [2515685 chr9  | 9  | 76711985  | 76713397  | 1413    | 2    | -0.997174 | 0.127661 | 76711430  | 76712541  | 76713170  | 76713621  |
| 372 NA18504 | [2515685 chr9  | 9  | 76785489  | 76787598  | 2110    | 2    | -0.790583 | 0.111769 | 76785038  | 76785941  | 76787269  | 76787921  |
| 373 NA18504 | [2515685 chr9  | 9  | 89413828  | 89422752  | 8925    | 7    | 0.333246  | 0.066489 | 89413332  | 89414325  | 89421346  | 89424151  |
| 374 NA18504 | [2515685 chr9  | 9  | 101788812 | 101790936 | 2125    | 2    | -0.722838 | 0.128137 | 101788588 | 101789037 | 101789706 | 101792161 |
| 375 NA18504 | [2515685 chr9  | 9  | 112902065 | 112930027 | 27963   | 39   | 0.531173  | 0.019814 | 112901557 | 112902574 | 112929804 | 112930251 |
| 376 NA18504 | [2515685 chr9  | 9  | 126050649 | 126054935 | 4287    | 4    | -0.947809 | 0.081571 | 126050359 | 126050940 | 126052573 | 126059121 |
| 377 NA18504 | [2515685 chr9  | 9  | 138188003 | 138189923 | 1921    | 45   | 0.478892  | 0.020708 | 138187808 | 138188198 | 138189840 | 138190001 |
| 378 NA18504 | [2515685 chr10 | 10 | 6693908   | 6703893   | 9986    | 8    | 0.770153  | 0.059052 | 6692231   | 6695585   | 6703779   | 67040081  |
| 379 NA18504 | [2515685 chr10 | 10 | 27615734  | 27714965  | 99232   | 2    | -0.665155 | 0.087904 | 27544493  | 27618481  | 27712218  | 27868411  |
| 380 NA18504 | [2515685 chr10 | 10 | 37487278  | 37529195  | 41918   | 64   | -0.550405 | 0.016063 | 37486985  | 37487572  | 37528890  | 37529501  |
| 381 NA18504 | [2515685 chr10 | 10 | 42564252  | 42565662  | 1411    | 4    | -0.61659  | 0.073305 | 42563949  | 42564556  | 42565423  | 42565901  |
| 382 NA18504 | [2515685 chr10 | 10 | 45494243  | 45519433  | 25191   | 62   | -0.25992  | 0.016024 | 45494187  | 45494299  | 45518088  | 45520771  |
| 383 NA18504 | [2515685 chr10 | 10 | 46097898  | 48936140  | 2838243 | 3966 | -0.283195 | 0.002115 | 46097600  | 46098197  | 48935745  | 48936531  |

|             |                |    |           |           |        |     |           |          |           |           |           |           |
|-------------|----------------|----|-----------|-----------|--------|-----|-----------|----------|-----------|-----------|-----------|-----------|
| 384 NA18504 | [2515685 chr10 | 10 | 51116618  | 51176464  | 59847  | 113 | -0.336238 | 0.012234 | 51067634  | 51119365  | 51175743  | 5117718!  |
| 385 NA18504 | [2515685 chr10 | 10 | 52136987  | 52143413  | 6427   | 9   | -0.263003 | 0.042961 | 52136355  | 52137619  | 52140666  | 5216594!  |
| 386 NA18504 | [2515685 chr10 | 10 | 54788960  | 54810763  | 21804  | 20  | -0.871643 | 0.039057 | 54788478  | 54789442  | 54810431  | 5481109!  |
| 387 NA18504 | [2515685 chr10 | 10 | 56117212  | 56139275  | 22064  | 20  | -0.929473 | 0.0354   | 56115764  | 56118661  | 56138931  | 5613961!  |
| 388 NA18504 | [2515685 chr10 | 10 | 56746349  | 56751868  | 5520   | 4   | -0.475802 | 0.090829 | 56746000  | 56746699  | 56749121  | 5675636!  |
| 389 NA18504 | [2515685 chr10 | 10 | 58879708  | 58882015  | 2308   | 5   | -0.856285 | 0.088413 | 58879568  | 58879849  | 58881863  | 5888216!  |
| 390 NA18504 | [2515685 chr10 | 10 | 62097182  | 62098101  | 920    | 3   | -0.876473 | 0.098688 | 62097051  | 62097313  | 62097872  | 6209833!  |
| 391 NA18504 | [2515685 chr10 | 10 | 81058430  | 81086642  | 28213  | 18  | -0.285491 | 0.030973 | 81058203  | 81058658  | 81085464  | 8108782!  |
| 392 NA18504 | [2515685 chr10 | 10 | 81380942  | 81406674  | 25733  | 15  | -0.276656 | 0.033799 | 81380568  | 81381316  | 81405496  | 8140785!  |
| 393 NA18504 | [2515685 chr10 | 10 | 81409207  | 81411316  | 2110   | 3   | 0.426469  | 0.08363  | 81407891  | 81410524  | 81411239  | 8141139!  |
| 394 NA18504 | [2515685 chr10 | 10 | 81662845  | 81669493  | 6649   | 10  | -0.343684 | 0.046351 | 81662614  | 81663077  | 81669128  | 8166985!  |
| 395 NA18504 | [2515685 chr10 | 10 | 88866216  | 88966295  | 100080 | 111 | -0.33997  | 0.013131 | 88865617  | 88866816  | 88965910  | 8896668!  |
| 396 NA18504 | [2515685 chr10 | 10 | 89138419  | 89179870  | 41452  | 69  | -0.258997 | 0.016892 | 89137950  | 89138889  | 89179587  | 8918015!  |
| 397 NA18504 | [2515685 chr10 | 10 | 114102241 | 114106477 | 4237   | 5   | 1.042256  | 0.077708 | 114101694 | 114102788 | 114105867 | 11410708! |
| 398 NA18504 | [2515685 chr10 | 10 | 117475894 | 117481991 | 6098   | 2   | 0.812235  | 0.131691 | 117474850 | 117476938 | 117479244 | 11753774! |
| 399 NA18504 | [2515685 chr10 | 10 | 124336365 | 124341749 | 5385   | 6   | 0.600469  | 0.069403 | 124335581 | 124337149 | 124341238 | 12434226! |
| 400 NA18504 | [2515685 chr10 | 10 | 124350353 | 124366738 | 16386  | 21  | -0.557653 | 0.026342 | 124350031 | 124350675 | 124366300 | 12436717! |
| 401 NA18504 | [2515685 chr10 | 10 | 127501662 | 127503978 | 2317   | 3   | -0.607353 | 0.079333 | 127501348 | 127501977 | 127503619 | 12750433! |
| 402 NA18504 | [2515685 chr10 | 10 | 134168766 | 134170259 | 1494   | 17  | -2.689845 | 0.061278 | 134168524 | 134169008 | 134170097 | 13417042! |
| 403 NA18504 | [2515685 chr10 | 10 | 134924761 | 134926337 | 1577   | 16  | 0.46868   | 0.04168  | 134924706 | 134924816 | 134926184 | 13492649! |
| 404 NA18504 | [2515685 chr10 | 10 | 135365507 | 135385759 | 20253  | 19  | 0.284891  | 0.027422 | 135366016 | 135366016 | 135386041 | 13538647! |
| 405 NA18504 | [2515685 chr11 | 11 | 83595     | 84037     | 443    | 2   | 0.787871  | 0.118756 | 83219     | 83972     | 83972     | 84102     |
| 406 NA18504 | [2515685 chr11 | 11 | 712932    | 714347    | 1416   | 2   | 0.463155  | 0.090916 | 712390    | 713474    | 714093    | 714601    |
| 407 NA18504 | [2515685 chr11 | 11 | 831591    | 841833    | 10243  | 12  | -0.251484 | 0.045107 | 830951    | 832232    | 841608    | 84205!    |
| 408 NA18504 | [2515685 chr11 | 11 | 969654    | 971069    | 1416   | 2   | 0.518341  | 0.098435 | 969333    | 969976    | 970737    | 971401    |
| 409 NA18504 | [2515685 chr11 | 11 | 1048733   | 1050368   | 1636   | 2   | -0.866518 | 0.119434 | 1048209   | 1049258   | 1050008   | 105072!   |
| 410 NA18504 | [2515685 chr11 | 11 | 2840307   | 2842410   | 2104   | 3   | 1.243218  | 0.094872 | 2839959   | 2840656   | 2841856   | 284296!   |
| 411 NA18504 | [2515685 chr11 | 11 | 2999681   | 3137580   | 137900 | 2   | -1.046838 | 0.095951 | 2949255   | 3002762   | 3134499   | 317326!   |
| 412 NA18504 | [2515685 chr11 | 11 | 3628748   | 3632795   | 4048   | 6   | -2.364057 | 0.085482 | 3625722   | 3631775   | 3632594   | 363299!   |
| 413 NA18504 | [2515685 chr11 | 11 | 4268999   | 4270262   | 1264   | 3   | 0.615206  | 0.08478  | 4268986   | 4269013   | 4269826   | 427069!   |
| 414 NA18504 | [2515685 chr11 | 11 | 4318494   | 4322001   | 3508   | 7   | 0.457364  | 0.052085 | 4318472   | 4318517   | 4321857   | 432214!   |
| 415 NA18504 | [2515685 chr11 | 11 | 4924831   | 4932599   | 7769   | 8   | -3.387132 | 0.09751  | 4924403   | 4925260   | 4931948   | 493325!   |
| 416 NA18504 | [2515685 chr11 | 11 | 4932599   | 4935850   | 3252   | 4   | -0.470001 | 0.070518 | 4931948   | 4933251   | 4935219   | 493648!   |
| 417 NA18504 | [2515685 chr11 | 11 | 5717038   | 5722026   | 4989   | 3   | 3.465789  | 0.15145  | 5716660   | 5717416   | 5718945   | 572548!   |
| 418 NA18504 | [2515685 chr11 | 11 | 5741269   | 5765993   | 24725  | 32  | 2.548445  | 0.04384  | 5741059   | 5741480   | 5765632   | 576635!   |
| 419 NA18504 | [2515685 chr11 | 11 | 11831868  | 11833089  | 1222   | 2   | 1.011589  | 0.114228 | 11831412  | 11832324  | 11832853  | 1183332!  |
| 420 NA18504 | [2515685 chr11 | 11 | 18892572  | 18893951  | 1380   | 2   | 0.642031  | 0.112112 | 18892457  | 18892687  | 18893738  | 1889416!  |
| 421 NA18504 | [2515685 chr11 | 11 | 18906905  | 18923020  | 16116  | 29  | 1.050324  | 0.029569 | 18906533  | 18907278  | 18919939  | 1892845!  |
| 422 NA18504 | [2515685 chr11 | 11 | 28965605  | 28969186  | 3582   | 5   | 4.398759  | 0.156085 | 28965284  | 28965927  | 28968702  | 2896967!  |
| 423 NA18504 | [2515685 chr11 | 11 | 48284073  | 48284771  | 699    | 2   | 1.048043  | 0.10599  | 48283862  | 48284285  | 48284572  | 4828497!  |
| 424 NA18504 | [2515685 chr11 | 11 | 49072856  | 49075952  | 3097   | 6   | 0.338934  | 0.060356 | 49072572  | 49073140  | 49075650  | 4907625!  |
| 425 NA18504 | [2515685 chr11 | 11 | 49665830  | 49715829  | 50000  | 35  | 0.522364  | 0.025108 | 49665251  | 49666410  | 49712748  | 4972198!  |
| 426 NA18504 | [2515685 chr11 | 11 | 60721034  | 60777477  | 56444  | 74  | 0.51913   | 0.014814 | 60720112  | 60721956  | 60776810  | 6077814!  |
| 427 NA18504 | [2515685 chr11 | 11 | 73812690  | 73818580  | 5891   | 4   | -0.524359 | 0.078362 | 73812400  | 73812981  | 73818213  | 7381894!  |
| 428 NA18504 | [2515685 chr11 | 11 | 74231882  | 74236200  | 4319   | 6   | -0.307744 | 0.060557 | 74231509  | 74232255  | 74235797  | 7423660!  |
| 429 NA18504 | [2515685 chr11 | 11 | 77325699  | 77348590  | 22892  | 4   | -0.319789 | 0.058592 | 77318692  | 77328780  | 77345509  | 7737022!  |
| 430 NA18504 | [2515685 chr11 | 11 | 81149111  | 81151638  | 2528   | 3   | 0.574357  | 0.09274  | 81148927  | 81149295  | 81151343  | 8115193!  |
| 431 NA18504 | [2515685 chr11 | 11 | 88266938  | 88285191  | 18254  | 25  | 0.318457  | 0.023791 | 88266424  | 88267453  | 88284987  | 8828539!  |
| 432 NA18504 | [2515685 chr11 | 11 | 88298478  | 88303948  | 5471   | 8   | 0.318457  | 0.023791 | 88298112  | 88298845  | 88303762  | 8830413!  |
| 433 NA18504 | [2515685 chr11 | 11 | 104230085 | 104265021 | 34937  | 33  | -0.866784 | 0.027187 | 104229815 | 104230355 | 104264796 | 10426524! |
| 434 NA18504 | [2515685 chr11 | 11 | 134107699 | 134112290 | 4592   | 5   | 0.78722   | 0.068504 | 134106591 | 134108808 | 134111845 | 13411273! |
| 435 NA18504 | [2515685 chr12 | 12 | 398598    | 404873    | 6276   | 14  | -0.318728 | 0.032718 | 398035    | 399161    | 401600    | 40814!    |
| 436 NA18504 | [2515685 chr12 | 12 | 736840    | 744802    | 7963   | 9   | 0.950999  | 0.052405 | 736616    | 737064    | 744211    | 74539!    |
| 437 NA18504 | [2515685 chr12 | 12 | 2116865   | 2127044   | 10180  | 13  | 0.756119  | 0.044558 | 2116538   | 2117192   | 2126809   | 212727!   |
| 438 NA18504 | [2515685 chr12 | 12 | 6113530   | 6117052   | 3523   | 3   | 0.5473    | 0.097727 | 6111640   | 6115421   | 6116289   | 611781!   |



|             |                |    |           |           |        |     |           |          |           |           |           |           |
|-------------|----------------|----|-----------|-----------|--------|-----|-----------|----------|-----------|-----------|-----------|-----------|
| 439 NA18504 | [2515685 chr12 | 12 | 7805680   | 7814020   | 8341   | 5   | 0.515924  | 0.064268 | 7804782   | 7806579   | 7813774   | 7814267   |
| 440 NA18504 | [2515685 chr12 | 12 | 8262986   | 8269259   | 6274   | 17  | 0.459881  | 0.032993 | 8262374   | 8263598   | 8268864   | 8269654   |
| 441 NA18504 | [2515685 chr12 | 12 | 11070849  | 11083764  | 12916  | 19  | -0.331095 | 0.034198 | 11069857  | 11071841  | 11083559  | 11083961  |
| 442 NA18504 | [2515685 chr12 | 12 | 11109398  | 11142012  | 32615  | 40  | -0.492799 | 0.024174 | 11109206  | 11109590  | 11141608  | 11142417  |
| 443 NA18504 | [2515685 chr12 | 12 | 11398049  | 11463223  | 65175  | 66  | -0.284339 | 0.018519 | 11397507  | 11398591  | 11459990  | 11466457  |
| 444 NA18504 | [2515685 chr12 | 12 | 12605956  | 12607299  | 1344   | 2   | 0.798147  | 0.141752 | 12605559  | 12606353  | 12606864  | 12607734  |
| 445 NA18504 | [2515685 chr12 | 12 | 31869218  | 31874787  | 5570   | 2   | 0.872328  | 0.109109 | 31791171  | 31872714  | 31872796  | 31876771  |
| 446 NA18504 | [2515685 chr12 | 12 | 36886168  | 36890395  | 4228   | 5   | -0.411505 | 0.06347  | 36886078  | 36886259  | 36887282  | 36893501  |
| 447 NA18504 | [2515685 chr12 | 12 | 65191669  | 65192750  | 1082   | 2   | 0.721461  | 0.135155 | 65191605  | 65191734  | 65192481  | 65193011  |
| 448 NA18504 | [2515685 chr12 | 12 | 69156916  | 69167892  | 10977  | 11  | 0.895819  | 0.051449 | 69138649  | 69160412  | 69164396  | 69215011  |
| 449 NA18504 | [2515685 chr12 | 12 | 70475445  | 70476812  | 1368   | 2   | -0.797071 | 0.124664 | 70475180  | 70475711  | 70476524  | 70477101  |
| 450 NA18504 | [2515685 chr12 | 12 | 78656134  | 78665261  | 9128   | 9   | -0.460218 | 0.05396  | 78654687  | 78657582  | 78664736  | 78665781  |
| 451 NA18504 | [2515685 chr12 | 12 | 92781979  | 93035182  | 253204 | 4   | 0.365115  | 0.061251 | 92722161  | 92785475  | 93031686  | 93155621  |
| 452 NA18504 | [2515685 chr12 | 12 | 127322032 | 127326052 | 4021   | 4   | 0.42944   | 0.081186 | 127321371 | 127322694 | 127325619 | 12732648  |
| 453 NA18504 | [2515685 chr12 | 12 | 128601598 | 128602937 | 1340   | 2   | -0.751089 | 0.110059 | 128601341 | 128601856 | 128602454 | 12860342  |
| 454 NA18504 | [2515685 chr12 | 12 | 130315291 | 130320068 | 4778   | 16  | 0.401366  | 0.032694 | 130315089 | 130315493 | 130319789 | 13032034  |
| 455 NA18504 | [2515685 chr12 | 12 | 130798727 | 130801060 | 2334   | 4   | -4.417145 | 0.165663 | 130798268 | 130799187 | 130800776 | 13080134  |
| 456 NA18504 | [2515685 chr12 | 12 | 131046250 | 131046750 | 501    | 2   | 1.216264  | 0.131797 | 131046129 | 131046371 | 131046551 | 13104694  |
| 457 NA18504 | [2515685 chr12 | 12 | 132249060 | 132249924 | 865    | 2   | 0.736252  | 0.12013  | 132248918 | 132249203 | 132249666 | 13225018  |
| 458 NA18504 | [2515685 chr13 | 13 | 25947233  | 25950398  | 3166   | 3   | 3.879437  | 0.174981 | 25946194  | 25948272  | 25949415  | 2595138   |
| 459 NA18504 | [2515685 chr13 | 13 | 33029575  | 33042392  | 12818  | 8   | 0.901591  | 0.059176 | 33000262  | 33034253  | 33041860  | 33042921  |
| 460 NA18504 | [2515685 chr13 | 13 | 56611711  | 56645734  | 34024  | 47  | 0.490552  | 0.016878 | 56610946  | 56612477  | 56645321  | 5664614   |
| 461 NA18504 | [2515685 chr13 | 13 | 56653890  | 56686136  | 32247  | 30  | -3.445884 | 0.053965 | 56650401  | 56657380  | 56685381  | 5668689   |
| 462 NA18504 | [2515685 chr13 | 13 | 69633905  | 69673289  | 39385  | 42  | 0.882644  | 0.024205 | 69633412  | 69634399  | 69672985  | 69673591  |
| 463 NA18504 | [2515685 chr13 | 13 | 109215660 | 109217089 | 1430   | 5   | 0.440776  | 0.059608 | 109215230 | 109216090 | 109216885 | 10921729  |
| 464 NA18504 | [2515685 chr13 | 13 | 110502383 | 110503129 | 747    | 3   | 0.701535  | 0.095568 | 110502225 | 110502541 | 110502890 | 11050336  |
| 465 NA18504 | [2515685 chr13 | 13 | 113079647 | 113086816 | 7170   | 3   | 0.673625  | 0.084847 | 113078890 | 113080404 | 113082138 | 11309434  |
| 466 NA18504 | [2515685 chr14 | 14 | 18435294  | 18826909  | 391616 | 634 | -0.447339 | 0.003742 | 18434782  | 18435807  | 18826790  | 18827021  |
| 467 NA18504 | [2515685 chr14 | 14 | 18856291  | 19265232  | 408942 | 717 | -0.447339 | 0.003742 | 18855875  | 18856707  | 19261661  | 1926880   |
| 468 NA18504 | [2515685 chr14 | 14 | 19619348  | 19625484  | 6137   | 3   | 4.21789   | 0.291778 | 19612261  | 19624114  | 19625018  | 19625951  |
| 469 NA18504 | [2515685 chr14 | 14 | 32022485  | 32026140  | 3656   | 2   | -0.784905 | 0.122269 | 32021695  | 32023276  | 32023749  | 3202853   |
| 470 NA18504 | [2515685 chr14 | 14 | 34183356  | 34192233  | 8878   | 12  | -0.701935 | 0.044537 | 34181692  | 34185020  | 34189097  | 34195371  |
| 471 NA18504 | [2515685 chr14 | 14 | 42059344  | 42062997  | 3654   | 2   | 0.845347  | 0.128756 | 42056485  | 42062203  | 42062601  | 42063391  |
| 472 NA18504 | [2515685 chr14 | 14 | 73052083  | 73053781  | 1699   | 2   | -0.514616 | 0.089605 | 73051714  | 73052452  | 73052927  | 73054631  |
| 473 NA18504 | [2515685 chr14 | 14 | 73070288  | 73084642  | 14355  | 16  | -0.427115 | 0.044848 | 73068747  | 73071829  | 73083193  | 73086091  |
| 474 NA18504 | [2515685 chr14 | 14 | 73095972  | 73117243  | 21272  | 16  | 0.270216  | 0.038229 | 73095334  | 73096611  | 73116211  | 73118271  |
| 475 NA18504 | [2515685 chr14 | 14 | 73640573  | 73663043  | 22471  | 19  | 0.552364  | 0.035694 | 73639291  | 73641855  | 73658431  | 73667651  |
| 476 NA18504 | [2515685 chr14 | 14 | 84630541  | 84632952  | 2412   | 2   | 0.469476  | 0.091877 | 84630054  | 84631028  | 84631604  | 8463430   |
| 477 NA18504 | [2515685 chr14 | 14 | 85334883  | 85336344  | 1462   | 2   | -0.587345 | 0.106633 | 85334444  | 85335322  | 85335984  | 8533670   |
| 478 NA18504 | [2515685 chr14 | 14 | 87471306  | 87481451  | 10146  | 15  | 0.297727  | 0.039268 | 87470721  | 87471891  | 87481242  | 874811661 |
| 479 NA18504 | [2515685 chr15 | 15 | 18458940  | 18565376  | 106437 | 107 | -0.302323 | 0.01241  | 18458212  | 18459669  | 18563074  | 18572401  |
| 480 NA18504 | [2515685 chr15 | 15 | 19044664  | 19574226  | 529563 | 637 | -0.27029  | 0.005524 | 19044489  | 19044840  | 19573774  | 19574671  |
| 481 NA18504 | [2515685 chr15 | 15 | 19763727  | 19805080  | 41354  | 56  | -0.298942 | 0.017858 | 19763507  | 19763947  | 19804866  | 1980529   |
| 482 NA18504 | [2515685 chr15 | 15 | 19838440  | 19845597  | 7158   | 12  | 0.412702  | 0.041122 | 19836986  | 19839894  | 19845254  | 1984594   |
| 483 NA18504 | [2515685 chr15 | 15 | 20228094  | 20234328  | 6235   | 12  | -0.46555  | 0.039814 | 20226486  | 20229703  | 20233781  | 20234871  |
| 484 NA18504 | [2515685 chr15 | 15 | 21003489  | 21062197  | 58709  | 57  | -0.295464 | 0.017321 | 21003314  | 21003665  | 21061995  | 21062401  |
| 485 NA18504 | [2515685 chr15 | 15 | 21606753  | 21614600  | 7848   | 7   | 0.94875   | 0.064287 | 21606459  | 21607047  | 21612298  | 21636691  |
| 486 NA18504 | [2515685 chr15 | 15 | 23482566  | 23483671  | 1106   | 2   | -1.565177 | 0.114989 | 23482224  | 23482908  | 23483437  | 23483901  |
| 487 NA18504 | [2515685 chr15 | 15 | 24986053  | 24992250  | 6198   | 7   | 0.882327  | 0.061684 | 24985426  | 24986680  | 24991680  | 24992821  |
| 488 NA18504 | [2515685 chr15 | 15 | 26331811  | 26343818  | 12008  | 25  | -0.466482 | 0.027489 | 26331265  | 26332358  | 26342288  | 26345341  |
| 489 NA18504 | [2515685 chr15 | 15 | 26536521  | 26542764  | 6244   | 12  | -0.499974 | 0.037924 | 26534914  | 26538129  | 26542214  | 2654331   |
| 490 NA18504 | [2515685 chr15 | 15 | 26875842  | 26877026  | 1185   | 2   | 0.973936  | 0.116891 | 26875299  | 26876385  | 26876824  | 26877221  |
| 491 NA18504 | [2515685 chr15 | 15 | 32478477  | 32484190  | 5714   | 8   | 0.360319  | 0.045446 | 32477943  | 32479011  | 32483260  | 32485121  |
| 492 NA18504 | [2515685 chr15 | 15 | 32504316  | 32592621  | 88306  | 75  | 0.585374  | 0.017833 | 32503998  | 32504634  | 32592260  | 32592981  |
| 493 NA18504 | [2515685 chr15 | 15 | 41642632  | 41644452  | 1821   | 2   | -0.479143 | 0.09414  | 41641893  | 41643371  | 41644409  | 41644491  |

|             |                |    |           |           |        |     |           |          |           |           |           |           |
|-------------|----------------|----|-----------|-----------|--------|-----|-----------|----------|-----------|-----------|-----------|-----------|
| 494 NA18504 | [2515685 chr15 | 15 | 41742183  | 41744003  | 1821   | 2   | -0.479142 | 0.09414  | 41741444  | 41742922  | 41743960  | 41744041  |
| 495 NA18504 | [2515685 chr15 | 15 | 43106834  | 43111174  | 4341   | 5   | 0.860387  | 0.066408 | 43106498  | 43107171  | 43111071  | 43111271  |
| 496 NA18504 | [2515685 chr15 | 15 | 74671388  | 74682820  | 11433  | 9   | 0.977496  | 0.054755 | 74671122  | 74671654  | 74680518  | 74689511  |
| 497 NA18504 | [2515685 chr15 | 15 | 75117585  | 75119946  | 2362   | 4   | 0.926034  | 0.073433 | 75117343  | 75117827  | 75119741  | 75120151  |
| 498 NA18504 | [2515685 chr15 | 15 | 77198464  | 77201050  | 2587   | 3   | -0.423702 | 0.083746 | 77197915  | 77199013  | 77200658  | 77201441  |
| 499 NA18504 | [2515685 chr15 | 15 | 80437061  | 80438640  | 1580   | 6   | 0.298512  | 0.057901 | 80436487  | 80437636  | 80438577  | 80438701  |
| 500 NA18504 | [2515685 chr15 | 15 | 80588100  | 80588985  | 886    | 2   | -1.070021 | 0.08666  | 80587699  | 80588502  | 80588602  | 80589361  |
| 501 NA18504 | [2515685 chr15 | 15 | 80823554  | 80827326  | 3773   | 8   | 0.300996  | 0.048778 | 80822980  | 80824129  | 80827184  | 80827461  |
| 502 NA18504 | [2515685 chr15 | 15 | 80982676  | 80983561  | 886    | 2   | -1.070021 | 0.08666  | 80982275  | 80983078  | 80983178  | 80983941  |
| 503 NA18504 | [2515685 chr15 | 15 | 82333041  | 82335194  | 2154   | 2   | -0.863741 | 0.106641 | 82332284  | 82333799  | 82334729  | 82335661  |
| 504 NA18504 | [2515685 chr15 | 15 | 83581911  | 83582575  | 665    | 2   | -1.070021 | 0.08666  | 83581731  | 83582092  | 83582192  | 83582951  |
| 505 NA18504 | [2515685 chr15 | 15 | 98234084  | 98240716  | 6633   | 8   | 0.870824  | 0.055816 | 98233842  | 98234327  | 98239350  | 98242081  |
| 506 NA18504 | [2515685 chr15 | 15 | 98570178  | 98571936  | 1759   | 2   | 0.646514  | 0.113996 | 98569684  | 98570672  | 98571158  | 98572711  |
| 507 NA18504 | [2515685 chr15 | 15 | 99453510  | 99455547  | 2038   | 3   | 0.848514  | 0.095955 | 99453160  | 99453860  | 99454156  | 99456931  |
| 508 NA18504 | [2515685 chr15 | 15 | 100109640 | 100122682 | 13043  | 98  | 0.899524  | 0.012347 | 100108905 | 100110376 | 100122315 | 100123051 |
| 509 NA18504 | [2515685 chr15 | 15 | 100264033 | 100309150 | 45118  | 18  | 0.337535  | 0.019152 | 100263857 | 100264210 | 100307499 | 100310801 |
| 510 NA18504 | [2515685 chr15 | 15 | 100312886 | 100331397 | 18512  | 30  | 0.337535  | 0.019152 | 100312707 | 100313065 | 100331245 | 100331551 |
| 511 NA18504 | [2515685 chr16 | 16 | 847093    | 851320    | 4228   | 8   | -0.5998   | 0.056586 | 846662    | 847525    | 849440    | 8572361   |
| 512 NA18504 | [2515685 chr16 | 16 | 5287117   | 5290631   | 3515   | 2   | 1.571102  | 0.135522 | 5286149   | 5288085   | 5288751   | 5293271   |
| 513 NA18504 | [2515685 chr16 | 16 | 6716514   | 6721766   | 5253   | 6   | 0.325182  | 0.058788 | 6715845   | 6717183   | 6721415   | 67221181  |
| 514 NA18504 | [2515685 chr16 | 16 | 14696077  | 14703775  | 7699   | 5   | 0.655458  | 0.051914 | 14695838  | 14696316  | 14703313  | 14704231  |
| 515 NA18504 | [2515685 chr16 | 16 | 14735195  | 14742897  | 7703   | 5   | 0.655458  | 0.051914 | 14734956  | 14735434  | 14742435  | 14743351  |
| 516 NA18504 | [2515685 chr16 | 16 | 14955818  | 15032337  | 76520  | 70  | -0.272667 | 0.017448 | 14955356  | 14956281  | 15031429  | 15033241  |
| 517 NA18504 | [2515685 chr16 | 16 | 16633469  | 16639120  | 5652   | 4   | 0.901211  | 0.07722  | 16632502  | 16634437  | 16638386  | 16639851  |
| 518 NA18504 | [2515685 chr16 | 16 | 20408943  | 20419891  | 10949  | 8   | -0.308013 | 0.050901 | 20408436  | 20409451  | 20419728  | 20420051  |
| 519 NA18504 | [2515685 chr16 | 16 | 20419891  | 20441474  | 21584  | 24  | -0.785711 | 0.032475 | 20419728  | 20420055  | 20441310  | 20441631  |
| 520 NA18504 | [2515685 chr16 | 16 | 20441474  | 20452336  | 10863  | 7   | -0.309909 | 0.053259 | 20441310  | 20441638  | 20451849  | 20452821  |
| 521 NA18504 | [2515685 chr16 | 16 | 21475160  | 21502620  | 27461  | 20  | 0.362367  | 0.032027 | 21474882  | 21475438  | 21501101  | 21504141  |
| 522 NA18504 | [2515685 chr16 | 16 | 22521651  | 22621799  | 100149 | 86  | 0.334241  | 0.015638 | 22521425  | 22521878  | 22621249  | 22622341  |
| 523 NA18504 | [2515685 chr16 | 16 | 28324917  | 28335549  | 10633  | 9   | -0.402731 | 0.048672 | 28324665  | 28325169  | 28334190  | 28336901  |
| 524 NA18504 | [2515685 chr16 | 16 | 28522768  | 28525408  | 2641   | 3   | 0.525222  | 0.077616 | 28522366  | 28523170  | 28525115  | 28525701  |
| 525 NA18504 | [2515685 chr16 | 16 | 28617225  | 28630243  | 13019  | 15  | -0.354787 | 0.038854 | 28615757  | 28618694  | 28630124  | 28630361  |
| 526 NA18504 | [2515685 chr16 | 16 | 30101364  | 30102578  | 1215   | 2   | 0.835133  | 0.114309 | 30101045  | 30101684  | 30102223  | 30102931  |
| 527 NA18504 | [2515685 chr16 | 16 | 31900721  | 31901605  | 885    | 2   | 0.813591  | 0.108152 | 31900500  | 31900942  | 31901267  | 31901941  |
| 528 NA18504 | [2515685 chr16 | 16 | 32098120  | 32099129  | 1010   | 4   | 0.349903  | 0.068752 | 32097813  | 32098428  | 32098927  | 32099331  |
| 529 NA18504 | [2515685 chr16 | 16 | 32106365  | 32106660  | 296    | 2   | 1.118449  | 0.114996 | 32106136  | 32106595  | 32106634  | 32106681  |
| 530 NA18504 | [2515685 chr16 | 16 | 32159898  | 32160377  | 480    | 2   | -2.08032  | 0.101881 | 32159453  | 32160343  | 32160346  | 32160401  |
| 531 NA18504 | [2515685 chr16 | 16 | 32209387  | 32219640  | 10254  | 20  | 0.3014    | 0.027628 | 32209224  | 32209551  | 32219531  | 32219741  |
| 532 NA18504 | [2515685 chr16 | 16 | 32606692  | 32607163  | 472    | 2   | -2.08032  | 0.101881 | 32606661  | 32606724  | 32606727  | 32607591  |
| 533 NA18504 | [2515685 chr16 | 16 | 32660409  | 32660703  | 295    | 2   | 1.118436  | 0.114996 | 32660384  | 32660435  | 32660474  | 32660931  |
| 534 NA18504 | [2515685 chr16 | 16 | 32667939  | 32668950  | 1012   | 5   | 0.333159  | 0.060369 | 32667738  | 32668141  | 32668644  | 32669251  |
| 535 NA18504 | [2515685 chr16 | 16 | 33039098  | 33040110  | 1013   | 5   | 0.333159  | 0.060369 | 33038792  | 33039405  | 33039908  | 33040311  |
| 536 NA18504 | [2515685 chr16 | 16 | 33047346  | 33047640  | 295    | 2   | 1.118449  | 0.114996 | 33047117  | 33047575  | 33047614  | 33047661  |
| 537 NA18504 | [2515685 chr16 | 16 | 33100875  | 33101346  | 472    | 2   | -2.080277 | 0.10188  | 33100438  | 33101312  | 33101315  | 33101371  |
| 538 NA18504 | [2515685 chr16 | 16 | 33157406  | 33157879  | 474    | 2   | -2.080309 | 0.101881 | 33156967  | 33157845  | 33157848  | 33157911  |
| 539 NA18504 | [2515685 chr16 | 16 | 33206787  | 33217055  | 10269  | 19  | 0.319131  | 0.02882  | 33206624  | 33206951  | 33216946  | 33217161  |
| 540 NA18504 | [2515685 chr16 | 16 | 33330653  | 33335621  | 4969   | 9   | 0.265975  | 0.047655 | 33330438  | 33330868  | 33335456  | 33335781  |
| 541 NA18504 | [2515685 chr16 | 16 | 33392689  | 33397333  | 4645   | 9   | 0.321578  | 0.046105 | 33392062  | 33393316  | 33397172  | 33397491  |
| 542 NA18504 | [2515685 chr16 | 16 | 33863082  | 33872679  | 9598   | 9   | 0.408065  | 0.050904 | 33860552  | 33864962  | 33871847  | 33873511  |
| 543 NA18504 | [2515685 chr16 | 16 | 34321826  | 34606125  | 284300 | 322 | -0.484026 | 0.008245 | 34317185  | 34323706  | 34605058  | 34607191  |
| 544 NA18504 | [2515685 chr16 | 16 | 57204541  | 57207585  | 3045   | 3   | 4.248175  | 0.185172 | 57204170  | 57204913  | 57206938  | 57208231  |
| 545 NA18504 | [2515685 chr16 | 16 | 70647381  | 70650857  | 3477   | 5   | 0.42824   | 0.066327 | 70647106  | 70647656  | 70650462  | 70651251  |
| 546 NA18504 | [2515685 chr16 | 16 | 70653409  | 70668660  | 15252  | 7   | 1.167186  | 0.063388 | 70653186  | 70653632  | 70668127  | 706691251 |
| 547 NA18504 | [2515685 chr16 | 16 | 76930776  | 76942282  | 11507  | 9   | 0.739998  | 0.048882 | 76930290  | 76931263  | 76941602  | 76942961  |
| 548 NA18504 | [2515685 chr16 | 16 | 83994929  | 84004171  | 9243   | 81  | -0.918302 | 0.01476  | 83994558  | 83995300  | 84003767  | 84004571  |

|             |                |    |          |          |        |     |           |          |          |          |          |          |
|-------------|----------------|----|----------|----------|--------|-----|-----------|----------|----------|----------|----------|----------|
| 549 NA18504 | [2515685 chr16 | 16 | 88181036 | 88182713 | 1678   | 2   | 0.645992  | 0.102002 | 88180612 | 88181461 | 88182173 | 8818325: |
| 550 NA18504 | [2515685 chr17 | 17 | 966845   | 969578   | 2734   | 21  | 0.414712  | 0.033846 | 966537   | 967154   | 969378   | 969779   |
| 551 NA18504 | [2515685 chr17 | 17 | 16657271 | 16665630 | 8360   | 13  | -0.315862 | 0.042084 | 16657056 | 16657486 | 16665353 | 1666590: |
| 552 NA18504 | [2515685 chr17 | 17 | 18297586 | 18311209 | 13624  | 22  | 0.369519  | 0.031299 | 18297407 | 18297765 | 18310937 | 1831148: |
| 553 NA18504 | [2515685 chr17 | 17 | 18331739 | 18332345 | 607    | 2   | -1.307484 | 0.107368 | 18331509 | 18331970 | 18331978 | 1833271: |
| 554 NA18504 | [2515685 chr17 | 17 | 18993014 | 19079161 | 86148  | 163 | -0.253677 | 0.010104 | 18992585 | 18993443 | 19078459 | 1907986: |
| 555 NA18504 | [2515685 chr17 | 17 | 20299935 | 20300531 | 597    | 2   | -1.307484 | 0.107368 | 20299568 | 20300303 | 20300311 | 2030075: |
| 556 NA18504 | [2515685 chr17 | 17 | 20325192 | 20325864 | 673    | 2   | 0.910882  | 0.089277 | 20324968 | 20325416 | 20325582 | 2032614: |
| 557 NA18504 | [2515685 chr17 | 17 | 20325864 | 20333050 | 7187   | 9   | 0.272748  | 0.049149 | 20325582 | 20326146 | 20332055 | 2033404: |
| 558 NA18504 | [2515685 chr17 | 17 | 21387086 | 21388859 | 1774   | 2   | -0.597608 | 0.108655 | 21386584 | 21387589 | 21388220 | 2138949: |
| 559 NA18504 | [2515685 chr17 | 17 | 21945626 | 21954909 | 9284   | 15  | -0.324522 | 0.03601  | 21945338 | 21945915 | 21954628 | 2195519: |
| 560 NA18504 | [2515685 chr17 | 17 | 31430406 | 31581038 | 150633 | 227 | 0.256237  | 0.005889 | 31429658 | 31431155 | 31580656 | 3158142: |
| 561 NA18504 | [2515685 chr17 | 17 | 31592272 | 31682601 | 90330  | 168 | 0.256237  | 0.005889 | 31591933 | 31592611 | 31682219 | 3168298: |
| 562 NA18504 | [2515685 chr17 | 17 | 31693833 | 31797790 | 103958 | 20  | 0.256237  | 0.005889 | 31693494 | 31694173 | 31698927 | 3179999: |
| 563 NA18504 | [2515685 chr17 | 17 | 31807301 | 31819557 | 12257  | 36  | 0.256237  | 0.005889 | 31806958 | 31807644 | 31819552 | 3181956: |
| 564 NA18504 | [2515685 chr17 | 17 | 32108231 | 32110389 | 2159   | 2   | -0.64031  | 0.10731  | 32107440 | 32109023 | 32110190 | 3211058: |
| 565 NA18504 | [2515685 chr17 | 17 | 33371411 | 33380681 | 9271   | 28  | 0.336504  | 0.024806 | 33371258 | 33371564 | 33380614 | 3338074: |
| 566 NA18504 | [2515685 chr17 | 17 | 33425145 | 33428360 | 3216   | 9   | -0.27608  | 0.046028 | 33424532 | 33425759 | 33428130 | 3342859: |
| 567 NA18504 | [2515685 chr17 | 17 | 33529907 | 33535932 | 6026   | 15  | 0.412048  | 0.033879 | 33529840 | 33529975 | 33535814 | 3353605: |
| 568 NA18504 | [2515685 chr17 | 17 | 33567816 | 33589403 | 21588  | 18  | 0.279274  | 0.031657 | 33564792 | 33570016 | 33589250 | 3358955: |
| 569 NA18504 | [2515685 chr17 | 17 | 33605351 | 33638078 | 32728  | 42  | 0.383648  | 0.022628 | 33605052 | 33605650 | 33637752 | 3363840: |
| 570 NA18504 | [2515685 chr17 | 17 | 33641281 | 33661121 | 19841  | 32  | -0.366955 | 0.026323 | 33640689 | 33641874 | 33660590 | 3366165: |
| 571 NA18504 | [2515685 chr17 | 17 | 36636559 | 36685343 | 48785  | 45  | -0.483111 | 0.02202  | 36635767 | 36637352 | 36684647 | 3668604: |
| 572 NA18504 | [2515685 chr17 | 17 | 36980694 | 36982743 | 2050   | 2   | 0.479925  | 0.094115 | 36980235 | 36981153 | 36982183 | 3698330: |
| 573 NA18504 | [2515685 chr17 | 17 | 41035524 | 41036525 | 1002   | 2   | 0.968158  | 0.105712 | 41035120 | 41035928 | 41035967 | 4103708: |
| 574 NA18504 | [2515685 chr17 | 17 | 41675037 | 41676708 | 1672   | 2   | 0.968152  | 0.105711 | 41673805 | 41676270 | 41676309 | 4167710: |
| 575 NA18504 | [2515685 chr17 | 17 | 41770024 | 41922047 | 152024 | 148 | -0.354683 | 0.006297 | 41769768 | 41770281 | 41920590 | 4192350: |
| 576 NA18504 | [2515685 chr17 | 17 | 41987438 | 42137410 | 149973 | 142 | -0.354683 | 0.006297 | 41987182 | 41987695 | 42135210 | 4214194: |
| 577 NA18504 | [2515685 chr17 | 17 | 42969422 | 42988804 | 19383  | 33  | -0.367535 | 0.025599 | 42968660 | 42970185 | 42988208 | 4298940: |
| 578 NA18504 | [2515685 chr17 | 17 | 42988804 | 43026670 | 37867  | 54  | 0.3277    | 0.020083 | 42988208 | 42989400 | 43025568 | 4302777: |
| 579 NA18504 | [2515685 chr17 | 17 | 57684723 | 57694683 | 9961   | 20  | 0.313955  | 0.030649 | 57684581 | 57684866 | 57694478 | 5769488: |
| 580 NA18504 | [2515685 chr18 | 18 | 14448785 | 14465978 | 17194  | 23  | -0.329862 | 0.030447 | 14448383 | 14449187 | 14465760 | 1446619: |
| 581 NA18504 | [2515685 chr18 | 18 | 14782043 | 14805394 | 23352  | 34  | 0.357231  | 0.022641 | 14781647 | 14782440 | 14804863 | 1480592: |
| 582 NA18504 | [2515685 chr18 | 18 | 62026554 | 62029990 | 3437   | 2   | 0.614416  | 0.116578 | 62025633 | 62027475 | 62029130 | 6203085: |
| 583 NA18504 | [2515685 chr18 | 18 | 74371540 | 74379534 | 7995   | 11  | 0.315749  | 0.039067 | 74371016 | 74372064 | 74378860 | 7438020: |
| 584 NA18504 | [2515685 chr18 | 18 | 74392800 | 74398225 | 5426   | 4   | 0.713231  | 0.075515 | 74390826 | 74394774 | 74397790 | 7439866: |
| 585 NA18504 | [2515685 chr19 | 19 | 16543    | 79514    | 62972  | 57  | 0.414974  | 0.01882  | 16003    | 17084    | 79338    | 7969C    |
| 586 NA18504 | [2515685 chr19 | 19 | 114218   | 114660   | 443    | 2   | 0.787871  | 0.118756 | 113842   | 114595   | 114595   | 114725   |
| 587 NA18504 | [2515685 chr19 | 19 | 252671   | 255224   | 2554   | 8   | 0.387481  | 0.051215 | 251836   | 253507   | 254742   | 255707   |
| 588 NA18504 | [2515685 chr19 | 19 | 310414   | 312953   | 2540   | 14  | -0.362933 | 0.038085 | 309687   | 311142   | 312913   | 312994   |
| 589 NA18504 | [2515685 chr19 | 19 | 331568   | 333129   | 1562   | 2   | 0.62131   | 0.096457 | 331314   | 331822   | 332310   | 33394E   |
| 590 NA18504 | [2515685 chr19 | 19 | 8708780  | 8763535  | 54756  | 94  | 0.427183  | 0.012573 | 8708296  | 8709264  | 8763160  | 876391:  |
| 591 NA18504 | [2515685 chr19 | 19 | 20387625 | 20510144 | 122520 | 71  | -0.486565 | 0.017806 | 20387407 | 20387844 | 20509558 | 2051073: |
| 592 NA18504 | [2515685 chr19 | 19 | 22150585 | 22151409 | 825    | 2   | -0.864114 | 0.148139 | 22150417 | 22150753 | 22151291 | 2215152: |
| 593 NA18504 | [2515685 chr19 | 19 | 22501497 | 22507794 | 6298   | 7   | -0.356691 | 0.050575 | 22500564 | 22502430 | 22507670 | 2250791: |
| 594 NA18504 | [2515685 chr19 | 19 | 22931051 | 22934759 | 3709   | 3   | 1.418358  | 0.114971 | 22918199 | 22933577 | 22934546 | 2293497: |
| 595 NA18504 | [2515685 chr19 | 19 | 23007905 | 23013841 | 5937   | 6   | 0.856214  | 0.067315 | 22990964 | 23010431 | 23013525 | 2301415: |
| 596 NA18504 | [2515685 chr19 | 19 | 23108259 | 23109446 | 1188   | 2   | 1.557785  | 0.127794 | 23107903 | 23108615 | 23108879 | 2311001: |
| 597 NA18504 | [2515685 chr19 | 19 | 23257205 | 23258538 | 1334   | 2   | -0.845423 | 0.120534 | 23256882 | 23257529 | 23258213 | 2325886: |
| 598 NA18504 | [2515685 chr19 | 19 | 24147959 | 24148730 | 772    | 3   | -0.560182 | 0.0843   | 24147835 | 24148083 | 24148193 | 2414926: |
| 599 NA18504 | [2515685 chr19 | 19 | 39419837 | 39421349 | 1513   | 3   | 0.574425  | 0.095181 | 39419616 | 39420059 | 39421018 | 3942168: |
| 600 NA18504 | [2515685 chr19 | 19 | 41450188 | 41493611 | 43424  | 28  | 0.480915  | 0.025487 | 41421528 | 41452714 | 41491085 | 4149785: |
| 601 NA18504 | [2515685 chr19 | 19 | 42450474 | 42487512 | 37039  | 33  | 0.481989  | 0.022674 | 42413600 | 42453000 | 42486487 | 4248853: |
| 602 NA18504 | [2515685 chr19 | 19 | 45090681 | 45092876 | 2196   | 5   | -0.290001 | 0.056378 | 45090169 | 45091194 | 45092683 | 4509306: |
| 603 NA18504 | [2515685 chr19 | 19 | 45412775 | 45413556 | 782    | 2   | -0.501089 | 0.099523 | 45412566 | 45412985 | 45413285 | 4541382: |

|             |                |    |           |           |        |     |           |          |           |           |           |          |
|-------------|----------------|----|-----------|-----------|--------|-----|-----------|----------|-----------|-----------|-----------|----------|
| 604 NA18504 | [2515685 chr19 | 19 | 48084955  | 48086112  | 1158   | 2   | 0.677004  | 0.09735  | 48084914  | 48084997  | 48085001  | 4808722  |
| 605 NA18504 | [2515685 chr19 | 19 | 48345237  | 48346299  | 1063   | 2   | 0.67701   | 0.097351 | 48345196  | 48345279  | 48345283  | 4834731  |
| 606 NA18504 | [2515685 chr19 | 19 | 53101846  | 53151974  | 50129  | 97  | -0.36883  | 0.012243 | 53101305  | 53102387  | 53151638  | 5315231  |
| 607 NA18504 | [2515685 chr19 | 19 | 55285877  | 55336157  | 50281  | 104 | -0.367226 | 0.011741 | 55285730  | 55286025  | 55335244  | 55337070 |
| 608 NA18504 | [2515685 chr19 | 19 | 58009101  | 58011677  | 2577   | 2   | -0.691015 | 0.116975 | 58008184  | 58010019  | 58011249  | 5801210  |
| 609 NA18504 | [2515685 chr19 | 19 | 58209430  | 58246367  | 36938  | 29  | -0.761727 | 0.027763 | 58208997  | 58209863  | 58245896  | 5824683  |
| 610 NA18504 | [2515685 chr19 | 19 | 59247755  | 59252061  | 4307   | 5   | 0.887469  | 0.071164 | 59246427  | 59249084  | 59251854  | 5925226  |
| 611 NA18504 | [2515685 chr19 | 19 | 59417162  | 59419784  | 2623   | 4   | 0.330392  | 0.062462 | 59416759  | 59417566  | 59419774  | 5941979  |
| 612 NA18504 | [2515685 chr19 | 19 | 59420142  | 59435274  | 15133  | 18  | 0.894708  | 0.036283 | 59419795  | 59420489  | 59435027  | 5943552  |
| 613 NA18504 | [2515685 chr19 | 19 | 59436916  | 59439536  | 2621   | 4   | 0.338862  | 0.063319 | 59436511  | 59437321  | 59439526  | 5943954  |
| 614 NA18504 | [2515685 chr19 | 19 | 59492384  | 59501725  | 9342   | 9   | 0.290758  | 0.046832 | 59491977  | 59492791  | 59501498  | 5950195  |
| 615 NA18504 | [2515685 chr19 | 19 | 60253276  | 60256797  | 3522   | 2   | -0.690527 | 0.115575 | 60252536  | 60254017  | 60256437  | 6025715  |
| 616 NA18504 | [2515685 chr19 | 19 | 60938168  | 60940006  | 1839   | 3   | -0.428067 | 0.083258 | 60937613  | 60938723  | 60939654  | 6094035  |
| 617 NA18504 | [2515685 chr20 | 20 | 15249645  | 15251805  | 2161   | 2   | -0.931046 | 0.113617 | 15249381  | 15249909  | 15251287  | 1525232  |
| 618 NA18504 | [2515685 chr20 | 20 | 25714111  | 25734783  | 20673  | 28  | -0.363969 | 0.026987 | 25713986  | 25714237  | 25734531  | 2573503  |
| 619 NA18504 | [2515685 chr20 | 20 | 25978392  | 25999063  | 20672  | 28  | -0.363969 | 0.026987 | 25978140  | 25978644  | 25998938  | 2599918  |
| 620 NA18504 | [2515685 chr20 | 20 | 26136817  | 26138192  | 1376   | 3   | 0.628368  | 0.095079 | 26136626  | 26137008  | 26137783  | 2613860  |
| 621 NA18504 | [2515685 chr20 | 20 | 49817373  | 49819212  | 1840   | 2   | 0.758444  | 0.129968 | 49816867  | 49817880  | 49818962  | 4981946  |
| 622 NA18504 | [2515685 chr20 | 20 | 59951513  | 59956235  | 4723   | 16  | 0.627475  | 0.034986 | 59950681  | 59952345  | 59956222  | 5995624  |
| 623 NA18504 | [2515685 chr20 | 20 | 61708834  | 61711805  | 2972   | 22  | -0.347061 | 0.03008  | 61708573  | 61709096  | 61711616  | 6171199  |
| 624 NA18504 | [2515685 chr20 | 20 | 61750868  | 61754878  | 4011   | 4   | -0.428587 | 0.070453 | 61750638  | 61751099  | 61754167  | 6175558  |
| 625 NA18504 | [2515685 chr20 | 20 | 62066380  | 62068214  | 1835   | 8   | 1.120229  | 0.053124 | 62066146  | 62066615  | 62067671  | 6206875  |
| 626 NA18504 | [2515685 chr20 | 20 | 62233505  | 62235897  | 2393   | 4   | 0.367518  | 0.059171 | 62232847  | 62234163  | 62235101  | 6223669  |
| 627 NA18504 | [2515685 chr21 | 21 | 13710332  | 13723234  | 12903  | 14  | 0.282977  | 0.039649 | 13708317  | 13712347  | 13723011  | 1372345  |
| 628 NA18504 | [2515685 chr21 | 21 | 13973513  | 13979982  | 6470   | 12  | -0.421205 | 0.040423 | 13973295  | 13973731  | 13979786  | 1398017  |
| 629 NA18504 | [2515685 chr22 | 22 | 14466121  | 14836807  | 370687 | 699 | -0.444904 | 0.005251 | 14466002  | 14466240  | 14836461  | 1483715  |
| 630 NA18504 | [2515685 chr22 | 22 | 16434845  | 16492480  | 57636  | 2   | -0.587915 | 0.1126   | 16399289  | 16437527  | 16489798  | 1654086  |
| 631 NA18504 | [2515685 chr22 | 22 | 17385504  | 17393232  | 7729   | 14  | -0.341682 | 0.038834 | 17385031  | 17385977  | 17392823  | 1739364  |
| 632 NA18504 | [2515685 chr22 | 22 | 19380073  | 19419488  | 39416  | 12  | -0.263963 | 0.04262  | 19377752  | 19382395  | 19416806  | 1944992  |
| 633 NA18504 | [2515685 chr22 | 22 | 22600453  | 22666331  | 65879  | 106 | -0.267216 | 0.014117 | 22598667  | 22602240  | 22666166  | 2266649  |
| 634 NA18504 | [2515685 chr22 | 22 | 22672624  | 22683930  | 11307  | 10  | 0.670573  | 0.052471 | 22672391  | 22672858  | 22681309  | 2268655  |
| 635 NA18504 | [2515685 chr22 | 22 | 22683930  | 22688523  | 4594   | 3   | -0.699784 | 0.100588 | 22681309  | 22686552  | 22687378  | 2268966  |
| 636 NA18504 | [2515685 chr22 | 22 | 22690382  | 22691501  | 1120   | 2   | 1.722472  | 0.138734 | 22690146  | 22690619  | 22691088  | 2269191  |
| 637 NA18504 | [2515685 chr22 | 22 | 22695407  | 22720154  | 24748  | 26  | 0.988707  | 0.039278 | 22695112  | 22695703  | 22719882  | 2272042  |
| 638 NA18504 | [2515685 chr22 | 22 | 23763753  | 23765515  | 1763   | 3   | -0.50075  | 0.084058 | 23763486  | 23764021  | 23765293  | 2376573  |
| 639 NA18504 | [2515685 chr22 | 22 | 33619409  | 33623490  | 4082   | 5   | 0.868822  | 0.070257 | 33618939  | 33619879  | 33622642  | 3362433  |
| 640 NA18504 | [2515685 chr22 | 22 | 43418479  | 43419675  | 1197   | 2   | 0.588871  | 0.099775 | 43418051  | 43418907  | 43419378  | 4341997  |
| 641 NA18504 | [2515685 chr22 | 22 | 43423146  | 43424201  | 1056   | 2   | -0.453068 | 0.090606 | 43422923  | 43423369  | 43423991  | 4342441  |
| 642 NA18504 | [2515685 chr22 | 22 | 43455661  | 43456925  | 1265   | 2   | -4.107714 | 0.259965 | 43455369  | 43455954  | 43456505  | 4345734  |
| 643 NA18504 | [2515685 chr22 | 22 | 43974217  | 43977458  | 3242   | 3   | -0.564957 | 0.085569 | 43973642  | 43974792  | 43977080  | 4397783  |
| 644 NA18504 | [2515685 chrX  | 23 | 565006    | 572967    | 7962   | 11  | -0.276674 | 0.045309 | 564762    | 565250    | 572752    | 573182   |
| 645 NA18504 | [2515685 chrX  | 23 | 1863641   | 1865837   | 2197   | 4   | -0.545094 | 0.075109 | 1862943   | 1864339   | 1865399   | 186627   |
| 646 NA18504 | [2515685 chrX  | 23 | 1979394   | 1983878   | 4485   | 15  | 0.251847  | 0.035503 | 1979134   | 1979654   | 1982685   | 198507   |
| 647 NA18504 | [2515685 chrX  | 23 | 2286200   | 2288297   | 2098   | 2   | 0.646859  | 0.096015 | 2285671   | 2286730   | 2287550   | 228904   |
| 648 NA18504 | [2515685 chrX  | 23 | 9143064   | 9145233   | 2170   | 2   | 1.19877   | 0.161043 | 9141962   | 9144166   | 9144864   | 914560   |
| 649 NA18504 | [2515685 chrX  | 23 | 9182407   | 9192056   | 9650   | 13  | 0.421451  | 0.039288 | 9181838   | 9182977   | 9191527   | 919258   |
| 650 NA18504 | [2515685 chrX  | 23 | 70658092  | 70699951  | 41860  | 43  | -0.346973 | 0.013003 | 70655953  | 70660231  | 70699683  | 7070022  |
| 651 NA18504 | [2515685 chrX  | 23 | 70707417  | 70741274  | 33858  | 69  | -0.346973 | 0.013003 | 70705657  | 70709178  | 70739877  | 7074267  |
| 652 NA18504 | [2515685 chrX  | 23 | 70741274  | 70745998  | 4725   | 38  | -5.436412 | 0.073005 | 70739871  | 70742677  | 70744597  | 7074740  |
| 653 NA18504 | [2515685 chrX  | 23 | 70745998  | 70779896  | 33899  | 71  | -0.431849 | 0.016863 | 70744597  | 70747400  | 70778136  | 7078165  |
| 654 NA18504 | [2515685 chrX  | 23 | 70787990  | 70792289  | 4300   | 2   | -0.77559  | 0.112353 | 70787631  | 70788349  | 70792144  | 7079243  |
| 655 NA18504 | [2515685 chrX  | 23 | 81199237  | 81214756  | 15520  | 19  | -1.030352 | 0.048431 | 81188859  | 81203217  | 81210776  | 8122500  |
| 656 NA18504 | [2515685 chrX  | 23 | 105355082 | 105360133 | 5052   | 17  | 0.434023  | 0.073003 | 105352123 | 105358042 | 105359168 | 10536109 |
| 657 NA18504 | [2515685 chrX  | 23 | 119787748 | 119789970 | 2223   | 3   | 0.549297  | 0.087605 | 119787006 | 119788491 | 119789667 | 11979027 |
| 658 NA18504 | [2515685 chrX  | 23 | 119791965 | 119844836 | 52872  | 77  | 0.55116   | 0.013465 | 119791661 | 119792270 | 119844499 | 11984517 |

|             |               |    |           |           |         |     |           |          |           |           |           |           |
|-------------|---------------|----|-----------|-----------|---------|-----|-----------|----------|-----------|-----------|-----------|-----------|
| 659 NA18504 | [2515685 chrX | 23 | 134529491 | 134533613 | 4123    | 3   | -1.037264 | 0.099377 | 134526377 | 134532605 | 134533388 | 134533383 |
| 660 NA18504 | [2515685 chrX | 23 | 134569408 | 134625407 | 56000   | 104 | 0.488391  | 0.008582 | 134569294 | 134569522 | 134624877 | 13462593  |
| 661 NA18504 | [2515685 chrX | 23 | 134645810 | 134698023 | 52214   | 106 | 0.488391  | 0.008582 | 134645280 | 134646341 | 134696803 | 13469924  |
| 662 NA18504 | [2515685 chrX | 23 | 134746536 | 134755274 | 8739    | 11  | 0.453585  | 0.041355 | 134738264 | 134750516 | 134755112 | 13475543  |
| 663 NA18504 | [2515685 chrX | 23 | 139811649 | 139822026 | 10378   | 17  | 0.366284  | 0.019595 | 139811766 | 139811766 | 139821839 | 13982221  |
| 664 NA18504 | [2515685 chrX | 23 | 139823654 | 139834061 | 10408   | 16  | 0.366284  | 0.019595 | 139823538 | 139823771 | 139830081 | 13984227  |
| 665 NA18504 | [2515685 chrX | 23 | 140051435 | 140066716 | 15282   | 26  | 0.301091  | 0.024273 | 140043259 | 140055415 | 140062736 | 14007331  |
| 666 NA18504 | [2515685 chrX | 23 | 140386662 | 140419267 | 32606   | 52  | 0.311325  | 0.017519 | 140378397 | 140390642 | 140418861 | 14041967  |
| 667 NA18504 | [2515685 chrX | 23 | 140500448 | 140513745 | 13298   | 26  | 0.334644  | 0.024866 | 140492162 | 140504428 | 140512707 | 14051478  |
| 668 NA18504 | [2515685 chrX | 23 | 140718840 | 140721084 | 2245    | 4   | 0.482677  | 0.084223 | 140718574 | 140719107 | 140720809 | 14072135  |
| 669 NA18504 | [2515685 chrX | 23 | 146064416 | 146075231 | 10816   | 24  | 0.473397  | 0.03002  | 146063725 | 146065107 | 146074535 | 14607592  |
| 670 NA18504 | [2515685 chrX | 23 | 154721706 | 154722677 | 972     | 2   | 0.785898  | 0.1265   | 154721235 | 154722178 | 154722342 | 15472301  |
| 671 NA18504 | [2515685 chrY | 24 | 565006    | 572967    | 7962    | 11  | -0.276674 | 0.045309 | 564762    | 565250    | 572752    | 573182    |
| 672 NA18504 | [2515685 chrY | 24 | 1863641   | 1865837   | 2197    | 4   | -0.545094 | 0.075109 | 1862943   | 1864339   | 1865399   | 1866276   |
| 673 NA18504 | [2515685 chrY | 24 | 1979394   | 1983878   | 4485    | 15  | 0.251847  | 0.035503 | 1979134   | 1979654   | 1982685   | 1985076   |
| 674 NA18504 | [2515685 chrY | 24 | 2286200   | 2288297   | 2098    | 2   | 0.646859  | 0.096015 | 2285671   | 2286730   | 2287550   | 2289047   |
| 675 NA18504 | [2515685 chrY | 24 | 3761291   | 4160665   | 399375  | 2   | 0.835181  | 0.105071 | 3640785   | 3764230   | 4157726   | 4581358   |
| 676 NA18504 | [2515685 chrY | 24 | 6156481   | 6161307   | 4827    | 29  | 0.432352  | 0.022805 | 6155989   | 6156974   | 6161120   | 6161495   |
| 677 NA18504 | [2515685 chrY | 24 | 6161875   | 6176178   | 14304   | 48  | 0.463852  | 0.017922 | 6161722   | 6162029   | 6176052   | 6176304   |
| 678 NA18504 | [2515685 chrY | 24 | 6184904   | 6191940   | 7037    | 8   | 0.432223  | 0.049163 | 6184493   | 6185316   | 6191551   | 6192330   |
| 679 NA18504 | [2515685 chrY | 24 | 9188837   | 9995077   | 806241  | 864 | 0.407921  | 0.004253 | 9188753   | 9188922   | 9994746   | 9995405   |
| 680 NA18504 | [2515685 chrY | 24 | 10325139  | 10340296  | 15158   | 8   | 0.441124  | 0.047597 | 10324750  | 10325529  | 10339804  | 10340785  |
| 681 NA18504 | [2515685 chrY | 24 | 10610662  | 10623994  | 13333   | 6   | 0.679011  | 0.057254 | 10608962  | 10612362  | 10623357  | 10624637  |
| 682 NA18504 | [2515685 chrY | 24 | 10627529  | 10629470  | 1942    | 3   | 0.585329  | 0.087234 | 10627041  | 10628018  | 10628889  | 10630057  |
| 683 NA18504 | [2515685 chrY | 24 | 18436551  | 18436927  | 377     | 2   | -0.588147 | 0.099076 | 18436460  | 18436643  | 18436672  | 1843718   |
| 684 NA18504 | [2515685 chrY | 24 | 18569095  | 18569470  | 376     | 2   | -0.588147 | 0.099076 | 18568840  | 18569350  | 18569379  | 1856956   |
| 685 NA18504 | [2515685 chrY | 24 | 19082898  | 19096780  | 13883   | 36  | 0.280999  | 0.027176 | 19082709  | 19083088  | 19096607  | 19096957  |
| 686 NA18504 | [2515685 chrY | 24 | 19172026  | 19248393  | 76368   | 73  | 0.26362   | 0.019712 | 19171913  | 19172139  | 19248280  | 19248501  |
| 687 NA18504 | [2515685 chrY | 24 | 19438567  | 21283056  | 1844490 | 18  | 0.326558  | 0.037685 | 19415188  | 19415188  | 21280117  | 2135926   |
| 688 NA18504 | [2515685 chrY | 24 | 21991456  | 22402263  | 410808  | 580 | 0.386869  | 0.005479 | 21991085  | 21991827  | 22402064  | 2240246   |
| 689 NA18504 | [2515685 chrY | 24 | 22420654  | 22421215  | 562     | 2   | -0.53421  | 0.105446 | 22420484  | 22420824  | 22420839  | 22421597  |
| 690 NA18504 | [2515685 chrY | 24 | 22650628  | 22665789  | 15162   | 53  | 0.509862  | 0.016694 | 22649721  | 22651535  | 22665407  | 22666177  |
| 691 NA18504 | [2515685 chrY | 24 | 22797835  | 22798350  | 516     | 2   | 0.588931  | 0.081819 | 22797713  | 22797957  | 22797960  | 2279874   |
| 692 NA18504 | [2515685 chrY | 24 | 22889169  | 22905218  | 16050   | 53  | 0.515007  | 0.016734 | 22888787  | 22889551  | 22905194  | 2290524   |
| 693 NA18504 | [2515685 chrY | 24 | 23133720  | 23134282  | 563     | 2   | -0.534209 | 0.105446 | 23133344  | 23134097  | 23134112  | 23134457  |
| 694 NA18504 | [2515685 chrY | 24 | 23316914  | 24010263  | 693350  | 572 | -0.553042 | 0.00347  | 23212454  | 23319853  | 24010203  | 2401032   |
| 695 NA18504 | [2515685 chrY | 24 | 24045265  | 24225388  | 180124  | 232 | -0.553042 | 0.00347  | 24045036  | 24045494  | 24225138  | 24225637  |
| 696 NA18504 | [2515685 chrY | 24 | 24227762  | 26410862  | 2183101 | 949 | -0.553042 | 0.00347  | 24227502  | 24228023  | 26410602  | 2641112   |
| 697 NA18504 | [2515685 chrY | 24 | 26413237  | 26451787  | 38551   | 28  | -0.553042 | 0.00347  | 26412987  | 26413487  | 26450951  | 26452627  |
| 698 NA18504 | [2515685 chrY | 24 | 26608149  | 26608711  | 563     | 2   | -0.534209 | 0.105446 | 26607773  | 26608526  | 26608541  | 2660888   |
| 699 NA18504 | [2515685 chrY | 24 | 26813773  | 27154704  | 340932  | 53  | 0.25011   | 0.021723 | 26766461  | 26816712  | 27151765  | 5738798   |
| 700 NA18504 | [2515685 chrY | 24 | 57599133  | 57600104  | 972     | 2   | 0.785898  | 0.1265   | 57598662  | 57599605  | 57599769  | 5760044   |
| 1 NA18517   | [2515685 chr1 | 1  | 76985     | 77845     | 861     | 2   | 0.59892   | 0.114675 | 76641     | 77329     | 77684     | 78006     |
| 2 NA18517   | [2515685 chr1 | 1  | 601046    | 612159    | 11114   | 8   | -1.055765 | 0.054705 | 587801    | 604315    | 610122    | 614196    |
| 3 NA18517   | [2515685 chr1 | 1  | 1853012   | 1854645   | 1634    | 2   | 0.511805  | 0.100736 | 1852616   | 1853409   | 1853816   | 1855476   |
| 4 NA18517   | [2515685 chr1 | 1  | 6429824   | 6452869   | 23046   | 4   | -0.443802 | 0.071638 | 6412294   | 6433093   | 6449600   | 6526270   |
| 5 NA18517   | [2515685 chr1 | 1  | 10416438  | 10418311  | 1874    | 2   | -0.886316 | 0.102327 | 10415863  | 10417014  | 10417712  | 10418917  |
| 6 NA18517   | [2515685 chr1 | 1  | 12826071  | 12869451  | 43381   | 55  | 0.283529  | 0.010241 | 12825750  | 12826392  | 12868612  | 1287029   |
| 7 NA18517   | [2515685 chr1 | 1  | 12874938  | 12926242  | 51305   | 119 | 0.283529  | 0.010241 | 12874781  | 12875096  | 12926178  | 12926307  |
| 8 NA18517   | [2515685 chr1 | 1  | 12926542  | 12926956  | 415     | 2   | -1.659138 | 0.143981 | 12926307  | 12926778  | 12926804  | 12927101  |
| 9 NA18517   | [2515685 chr1 | 1  | 12995178  | 13001855  | 6678    | 9   | 0.302733  | 0.050624 | 12994551  | 12995806  | 13001230  | 13002481  |
| 10 NA18517  | [2515685 chr1 | 1  | 13120568  | 13165991  | 45424   | 96  | 0.32121   | 0.014057 | 13120504  | 13120633  | 13165683  | 13166301  |
| 11 NA18517  | [2515685 chr1 | 1  | 13368830  | 13374693  | 5864    | 10  | 0.442566  | 0.042114 | 13368443  | 13369217  | 13374411  | 13374971  |
| 12 NA18517  | [2515685 chr1 | 1  | 13379417  | 13379965  | 549     | 2   | 0.663099  | 0.101769 | 13379164  | 13379671  | 13379686  | 1338024   |
| 13 NA18517  | [2515685 chr1 | 1  | 13380737  | 13383503  | 2767    | 4   | 0.787592  | 0.06403  | 13380415  | 13381060  | 13383163  | 1338384   |

|            |               |   |            |           |        |     |           |          |           |           |           |          |
|------------|---------------|---|------------|-----------|--------|-----|-----------|----------|-----------|-----------|-----------|----------|
| 14 NA18517 | [2515685 chr1 | 1 | 13385220   | 13386788  | 1569   | 4   | 0.568332  | 0.065245 | 13384964  | 13385476  | 13386480  | 13387097 |
| 15 NA18517 | [2515685 chr1 | 1 | 16522975   | 16524502  | 1528   | 2   | -0.50835  | 0.100858 | 16522323  | 16523627  | 16524165  | 16524831 |
| 16 NA18517 | [2515685 chr1 | 1 | 16544213   | 16573201  | 28989  | 27  | -0.287829 | 0.026927 | 16542453  | 16545973  | 16572675  | 16573727 |
| 17 NA18517 | [2515685 chr1 | 1 | 16723148   | 16727769  | 4622   | 10  | 0.280745  | 0.045741 | 16722924  | 16723372  | 16727506  | 16728031 |
| 18 NA18517 | [2515685 chr1 | 1 | 16752442   | 16796873  | 44432  | 53  | -0.451339 | 0.019874 | 16752162  | 16752722  | 16796422  | 16797321 |
| 19 NA18517 | [2515685 chr1 | 1 | 16833315   | 16837397  | 4083   | 5   | 0.506453  | 0.063726 | 16832899  | 16833731  | 16837012  | 16837778 |
| 20 NA18517 | [2515685 chr1 | 1 | 16978201   | 17022835  | 44635  | 47  | -0.310298 | 0.02157  | 16977706  | 16978696  | 17021339  | 17024337 |
| 21 NA18517 | [2515685 chr1 | 1 | 25352992   | 25381274  | 28283  | 28  | 0.323689  | 0.019454 | 25352754  | 25353230  | 25380813  | 25381731 |
| 22 NA18517 | [2515685 chr1 | 1 | 25391148   | 25409301  | 18154  | 24  | 0.323689  | 0.019454 | 25390773  | 25391523  | 25408840  | 25409767 |
| 23 NA18517 | [2515685 chr1 | 1 | 25434181   | 25439981  | 5801   | 14  | 0.318678  | 0.039172 | 25433990  | 25434373  | 25438920  | 25441047 |
| 24 NA18517 | [2515685 chr1 | 1 | 62150881   | 62164151  | 13271  | 12  | -0.917669 | 0.049271 | 62150623  | 62151139  | 62163078  | 62165221 |
| 25 NA18517 | [2515685 chr1 | 1 | 72467674   | 72476358  | 8685   | 5   | -0.824022 | 0.071702 | 72467220  | 72468129  | 72475692  | 72477021 |
| 26 NA18517 | [2515685 chr1 | 1 | 72478372   | 72524180  | 45809  | 36  | 0.953403  | 0.026071 | 72478140  | 72478604  | 72523661  | 72524701 |
| 27 NA18517 | [2515685 chr1 | 1 | 86112825   | 86116608  | 3784   | 5   | -2.680257 | 0.117035 | 86112582  | 86113069  | 86116349  | 86116867 |
| 28 NA18517 | [2515685 chr1 | 1 | 89188117   | 89190762  | 2646   | 5   | 1.662444  | 0.090652 | 89187764  | 89188470  | 89190458  | 89191067 |
| 29 NA18517 | [2515685 chr1 | 1 | 94869509   | 94870854  | 1346   | 3   | 0.456577  | 0.080965 | 94869219  | 94869799  | 94870647  | 94871106 |
| 30 NA18517 | [2515685 chr1 | 1 | 103815525  | 103852783 | 37259  | 50  | 0.427465  | 0.021039 | 103815249 | 103815802 | 103852543 | 10385302 |
| 31 NA18517 | [2515685 chr1 | 1 | 103866317  | 103873304 | 6988   | 10  | 0.345588  | 0.047811 | 103865345 | 103867290 | 103873021 | 10387358 |
| 32 NA18517 | [2515685 chr1 | 1 | 103932835  | 103939709 | 6875   | 12  | 0.288363  | 0.041335 | 103932057 | 103933614 | 103937206 | 10394221 |
| 33 NA18517 | [2515685 chr1 | 1 | 105728161  | 105735462 | 7302   | 8   | -0.871433 | 0.059245 | 105727820 | 105728503 | 105734532 | 10573639 |
| 34 NA18517 | [2515685 chr1 | 1 | 108444641  | 108449550 | 4910   | 9   | 0.754979  | 0.051952 | 108443817 | 108445466 | 108449824 | 10844987 |
| 35 NA18517 | [2515685 chr1 | 1 | 108514938  | 108565175 | 50238  | 59  | 0.384636  | 0.01959  | 108514864 | 108515012 | 108565023 | 10856532 |
| 36 NA18517 | [2515685 chr1 | 1 | 108638318  | 108688767 | 50450  | 59  | 0.387449  | 0.019508 | 108638254 | 108638383 | 108688693 | 10868884 |
| 37 NA18517 | [2515685 chr1 | 1 | 109933252  | 109935157 | 1906   | 3   | 0.621751  | 0.084161 | 109932716 | 109933789 | 109935040 | 10993527 |
| 38 NA18517 | [2515685 chr1 | 1 | 109936541  | 109965726 | 29186  | 31  | 0.686672  | 0.027902 | 109935803 | 109937279 | 109965065 | 10996638 |
| 39 NA18517 | [2515685 chr1 | 1 | 1111089464 | 111100714 | 11251  | 11  | -0.920044 | 0.049118 | 111088288 | 111090640 | 111100119 | 11110131 |
| 40 NA18517 | [2515685 chr1 | 1 | 112405902  | 112416691 | 10790  | 10  | 0.579715  | 0.050451 | 112405415 | 112406389 | 112416423 | 11241696 |
| 41 NA18517 | [2515685 chr1 | 1 | 116874175  | 116915240 | 41066  | 51  | 0.396177  | 0.020648 | 116873908 | 116874442 | 116914887 | 11691559 |
| 42 NA18517 | [2515685 chr1 | 1 | 141971552  | 141976719 | 5168   | 17  | 0.281686  | 0.032733 | 141971472 | 141971633 | 141976542 | 14197689 |
| 43 NA18517 | [2515685 chr1 | 1 | 142744385  | 142745273 | 889    | 2   | 0.713567  | 0.116363 | 142743794 | 142744976 | 142745023 | 14274552 |
| 44 NA18517 | [2515685 chr1 | 1 | 145100273  | 145105440 | 5168   | 16  | 0.294647  | 0.034424 | 145100193 | 145100354 | 145105263 | 14510561 |
| 45 NA18517 | [2515685 chr1 | 1 | 145819541  | 145840436 | 20896  | 24  | 0.401978  | 0.030963 | 145819262 | 145819821 | 145840201 | 14584067 |
| 46 NA18517 | [2515685 chr1 | 1 | 145855195  | 145860363 | 5169   | 5   | 0.530522  | 0.066321 | 145848112 | 145858464 | 145860127 | 14586059 |
| 47 NA18517 | [2515685 chr1 | 1 | 145896002  | 145899638 | 3637   | 3   | 0.683485  | 0.093771 | 145894632 | 145897372 | 145899362 | 14589991 |
| 48 NA18517 | [2515685 chr1 | 1 | 145927065  | 145951531 | 24467  | 30  | 0.45626   | 0.026998 | 145926783 | 145927347 | 145951467 | 14595159 |
| 49 NA18517 | [2515685 chr1 | 1 | 145958491  | 145960052 | 1562   | 2   | 0.665909  | 0.108323 | 145957782 | 145959200 | 145959639 | 14596046 |
| 50 NA18517 | [2515685 chr1 | 1 | 146330898  | 146336084 | 5187   | 14  | 0.30794   | 0.036547 | 146330704 | 146331093 | 146336004 | 14633616 |
| 51 NA18517 | [2515685 chr1 | 1 | 146458878  | 146460097 | 1220   | 2   | 0.554508  | 0.100343 | 146457879 | 146459877 | 146459894 | 14646030 |
| 52 NA18517 | [2515685 chr1 | 1 | 146808546  | 146809451 | 906    | 2   | -0.53612  | 0.104247 | 146808090 | 146809003 | 146809142 | 14680976 |
| 53 NA18517 | [2515685 chr1 | 1 | 149573821  | 149583431 | 9611   | 5   | 0.954459  | 0.07666  | 149573460 | 149574182 | 149582912 | 14958395 |
| 54 NA18517 | [2515685 chr1 | 1 | 158292764  | 158377436 | 84673  | 100 | -0.620776 | 0.014899 | 158292386 | 158293142 | 158377203 | 15837767 |
| 55 NA18517 | [2515685 chr1 | 1 | 186509787  | 186517962 | 8176   | 12  | 0.46955   | 0.044272 | 186508452 | 186511122 | 186517581 | 18651834 |
| 56 NA18517 | [2515685 chr1 | 1 | 193443495  | 193455127 | 11633  | 10  | -0.292663 | 0.047736 | 193443280 | 193443710 | 193454678 | 19345557 |
| 57 NA18517 | [2515685 chr1 | 1 | 193455127  | 193552515 | 97389  | 83  | -0.93308  | 0.019401 | 193454678 | 193455576 | 193551981 | 19355305 |
| 58 NA18517 | [2515685 chr1 | 1 | 193620474  | 193650443 | 29970  | 23  | -0.361666 | 0.030591 | 193620254 | 193620694 | 193650245 | 19365064 |
| 59 NA18517 | [2515685 chr1 | 1 | 204229515  | 204234080 | 4566   | 4   | -0.684547 | 0.075422 | 204228648 | 204230383 | 204233127 | 20423503 |
| 60 NA18517 | [2515685 chr1 | 1 | 206859240  | 206951729 | 92490  | 3   | 0.464079  | 0.076667 | 206791904 | 206862509 | 206950476 | 20695298 |
| 61 NA18517 | [2515685 chr1 | 1 | 218762650  | 218768272 | 5623   | 6   | 0.360181  | 0.061995 | 218762212 | 218763089 | 218767017 | 21876952 |
| 62 NA18517 | [2515685 chr1 | 1 | 218773112  | 218775164 | 2053   | 2   | -0.589256 | 0.096951 | 218772732 | 218773492 | 218775488 | 21877574 |
| 63 NA18517 | [2515685 chr1 | 1 | 220570241  | 220571400 | 1160   | 2   | 0.500575  | 0.100114 | 220569940 | 220570543 | 220571101 | 22057170 |
| 64 NA18517 | [2515685 chr1 | 1 | 233202665  | 233204956 | 2292   | 42  | -0.360519 | 0.021539 | 233202312 | 233203018 | 233204364 | 23320554 |
| 65 NA18517 | [2515685 chr1 | 1 | 236719047  | 236720968 | 1922   | 3   | -3.545912 | 0.163778 | 236718751 | 236719344 | 236720749 | 23672118 |
| 66 NA18517 | [2515685 chr1 | 1 | 239368545  | 239481883 | 113339 | 13  | -0.40555  | 0.041269 | 239368239 | 239368851 | 239478614 | 23949135 |
| 67 NA18517 | [2515685 chr1 | 1 | 243009520  | 243011368 | 1849   | 3   | -0.955035 | 0.091012 | 243008430 | 243010610 | 243011204 | 24301153 |
| 68 NA18517 | [2515685 chr1 | 1 | 244839162  | 244840480 | 1319   | 3   | 0.480013  | 0.082518 | 244838949 | 244839375 | 244840167 | 24484079 |

|             |               |   |           |           |        |    |           |          |           |           |           |          |
|-------------|---------------|---|-----------|-----------|--------|----|-----------|----------|-----------|-----------|-----------|----------|
| 69 NA18517  | [2515685 chr1 | 1 | 244872415 | 244874098 | 1684   | 5  | 0.373697  | 0.071359 | 244872245 | 244872585 | 244873799 | 24487439 |
| 70 NA18517  | [2515685 chr1 | 1 | 244960293 | 244962187 | 1895   | 3  | 0.817124  | 0.096403 | 244959817 | 244960769 | 244961807 | 24496256 |
| 71 NA18517  | [2515685 chr1 | 1 | 245065841 | 245121920 | 56080  | 53 | -0.79475  | 0.021055 | 245065663 | 245066019 | 245121605 | 24512223 |
| 72 NA18517  | [2515685 chr1 | 1 | 245142466 | 245143586 | 1121   | 2  | 0.541598  | 0.106169 | 245142217 | 245142716 | 245143361 | 24514381 |
| 73 NA18517  | [2515685 chr1 | 1 | 245192200 | 245200716 | 8517   | 8  | -0.878864 | 0.058093 | 245191047 | 245193354 | 245200082 | 24520135 |
| 74 NA18517  | [2515685 chr2 | 2 | 296456    | 298925    | 2470   | 8  | -0.384615 | 0.053698 | 296213    | 296699    | 298661    | 299185   |
| 75 NA18517  | [2515685 chr2 | 2 | 388500    | 391649    | 3150   | 7  | -0.472352 | 0.056759 | 387915    | 389086    | 391236    | 392063   |
| 76 NA18517  | [2515685 chr2 | 2 | 13507585  | 13514975  | 7391   | 9  | -0.259911 | 0.050864 | 13507388  | 13507783  | 13512022  | 13519011 |
| 77 NA18517  | [2515685 chr2 | 2 | 34606444  | 34644765  | 38322  | 39 | 0.811574  | 0.02502  | 34601818  | 34609397  | 34641812  | 34648397 |
| 78 NA18517  | [2515685 chr2 | 2 | 34739031  | 34741295  | 2265   | 3  | -0.876316 | 0.099044 | 34738758  | 34739304  | 34740438  | 34742157 |
| 79 NA18517  | [2515685 chr2 | 2 | 35896477  | 35905932  | 9456   | 3  | -3.501653 | 0.156055 | 35879425  | 35899430  | 35902979  | 35909827 |
| 80 NA18517  | [2515685 chr2 | 2 | 37869648  | 37911473  | 41826  | 43 | -0.429116 | 0.022236 | 37869077  | 37870220  | 37911214  | 37911737 |
| 81 NA18517  | [2515685 chr2 | 2 | 40523929  | 40526533  | 2605   | 3  | -0.904131 | 0.094191 | 40523660  | 40524199  | 40525696  | 40527377 |
| 82 NA18517  | [2515685 chr2 | 2 | 51686194  | 51695425  | 9232   | 10 | 0.284563  | 0.045166 | 51685834  | 51686554  | 51693913  | 51696931 |
| 83 NA18517  | [2515685 chr2 | 2 | 52661573  | 52696869  | 35297  | 26 | -0.853205 | 0.031048 | 52661218  | 52661928  | 52696416  | 52697327 |
| 84 NA18517  | [2515685 chr2 | 2 | 56563624  | 56567381  | 3758   | 2  | 4.104934  | 0.226614 | 56556559  | 56566577  | 56567035  | 56567727 |
| 85 NA18517  | [2515685 chr2 | 2 | 61675589  | 61676777  | 1189   | 2  | 0.769459  | 0.12694  | 61675200  | 61675979  | 61676468  | 61677087 |
| 86 NA18517  | [2515685 chr2 | 2 | 73922874  | 73948487  | 25614  | 41 | -0.693457 | 0.020483 | 73922730  | 73923019  | 73948060  | 73948911 |
| 87 NA18517  | [2515685 chr2 | 2 | 80702319  | 80703777  | 1459   | 2  | 0.628578  | 0.120119 | 80701968  | 80702670  | 80703271  | 80704287 |
| 88 NA18517  | [2515685 chr2 | 2 | 87473293  | 87478765  | 5473   | 9  | 0.349616  | 0.047587 | 87472060  | 87474526  | 87478435  | 87479091 |
| 89 NA18517  | [2515685 chr2 | 2 | 87981683  | 88098957  | 117275 | 10 | 0.341044  | 0.047038 | 87965922  | 87984636  | 88097049  | 88100861 |
| 90 NA18517  | [2515685 chr2 | 2 | 88121895  | 88128863  | 6969   | 11 | 0.25418   | 0.044642 | 88121607  | 88122184  | 88128645  | 88129087 |
| 91 NA18517  | [2515685 chr2 | 2 | 91337090  | 91345425  | 8336   | 11 | 0.370524  | 0.044137 | 91334271  | 91339909  | 91344992  | 91345851 |
| 92 NA18517  | [2515685 chr2 | 2 | 97184386  | 97189735  | 5350   | 2  | -0.880833 | 0.10675  | 97182781  | 97185992  | 97186782  | 97196727 |
| 93 NA18517  | [2515685 chr2 | 2 | 97235519  | 97250626  | 15108  | 18 | 0.291312  | 0.035236 | 97234682  | 97236357  | 97250111  | 97251114 |
| 94 NA18517  | [2515685 chr2 | 2 | 97329019  | 97339161  | 10143  | 22 | 0.320822  | 0.030742 | 97328936  | 97329103  | 97338784  | 97339531 |
| 95 NA18517  | [2515685 chr2 | 2 | 97580627  | 97590319  | 9693   | 20 | 0.326996  | 0.032271 | 97580250  | 97581005  | 97589784  | 97590857 |
| 96 NA18517  | [2515685 chr2 | 2 | 97613796  | 97614932  | 1137   | 2  | 1.215528  | 0.126893 | 97613553  | 97614040  | 97614467  | 97615391 |
| 97 NA18517  | [2515685 chr2 | 2 | 108313968 | 108314875 | 908    | 2  | 0.766723  | 0.108105 | 108313664 | 108314272 | 108314680 | 10831507 |
| 98 NA18517  | [2515685 chr2 | 2 | 117412529 | 117414883 | 2355   | 2  | -0.653322 | 0.109248 | 117411301 | 117413758 | 117414646 | 11741512 |
| 99 NA18517  | [2515685 chr2 | 2 | 126159437 | 126168349 | 8913   | 3  | -0.944695 | 0.088556 | 126158494 | 126160381 | 126168048 | 12616865 |
| 100 NA18517 | [2515685 chr2 | 2 | 130119337 | 130120539 | 1203   | 8  | -0.296339 | 0.055606 | 130118954 | 130119720 | 130120344 | 13012073 |
| 101 NA18517 | [2515685 chr2 | 2 | 130265328 | 130274460 | 9133   | 13 | -0.682221 | 0.043153 | 130264902 | 130265754 | 130273870 | 13027505 |
| 102 NA18517 | [2515685 chr2 | 2 | 130671327 | 130673436 | 2110   | 2  | -0.76702  | 0.117192 | 130670912 | 130671743 | 130672351 | 13067452 |
| 103 NA18517 | [2515685 chr2 | 2 | 132066092 | 132068531 | 2440   | 3  | -0.499229 | 0.091619 | 132065092 | 132067092 | 132067922 | 13206914 |
| 104 NA18517 | [2515685 chr2 | 2 | 132846945 | 132880027 | 33083  | 29 | 0.291159  | 0.028014 | 132846760 | 132847131 | 132879756 | 13288029 |
| 105 NA18517 | [2515685 chr2 | 2 | 153495550 | 153499409 | 3860   | 2  | 0.749414  | 0.121338 | 153484545 | 153498503 | 153498846 | 15349997 |
| 106 NA18517 | [2515685 chr2 | 2 | 153622711 | 153625256 | 2546   | 3  | 0.923965  | 0.091834 | 153621175 | 153624247 | 153625088 | 15362542 |
| 107 NA18517 | [2515685 chr2 | 2 | 179342191 | 179354090 | 11900  | 16 | -0.323968 | 0.036158 | 179341856 | 179342527 | 179353696 | 17935448 |
| 108 NA18517 | [2515685 chr2 | 2 | 195804965 | 195809805 | 4841   | 5  | -0.615515 | 0.068816 | 195803577 | 195806354 | 195809355 | 19581025 |
| 109 NA18517 | [2515685 chr2 | 2 | 205395113 | 205396457 | 1345   | 2  | 0.533845  | 0.094569 | 205394878 | 205395348 | 205396138 | 20539677 |
| 110 NA18517 | [2515685 chr2 | 2 | 208176479 | 208184457 | 7979   | 7  | 0.900035  | 0.059855 | 208176093 | 208176865 | 208183930 | 20818498 |
| 111 NA18517 | [2515685 chr2 | 2 | 240700660 | 240702469 | 1810   | 2  | -0.731    | 0.101237 | 240700238 | 240701082 | 240702135 | 24070280 |
| 112 NA18517 | [2515685 chr2 | 2 | 242400138 | 242415117 | 14980  | 14 | -0.261242 | 0.039934 | 242398886 | 242401390 | 242414987 | 24241524 |
| 113 NA18517 | [2515685 chr2 | 2 | 242430340 | 242432140 | 1801   | 2  | -0.872165 | 0.122764 | 242430091 | 242430589 | 242431346 | 24243293 |
| 114 NA18517 | [2515685 chr2 | 2 | 242664580 | 242668683 | 4104   | 10 | 0.326456  | 0.041358 | 242664284 | 242664877 | 242668532 | 24266883 |
| 115 NA18517 | [2515685 chr3 | 3 | 288772    | 301448    | 12677  | 16 | 0.55004   | 0.038218 | 288509    | 289036    | 301050    | 301846   |
| 116 NA18517 | [2515685 chr3 | 3 | 587432    | 638425    | 50994  | 44 | -0.298493 | 0.022175 | 586921    | 587943    | 638149    | 638701   |
| 117 NA18517 | [2515685 chr3 | 3 | 1757211   | 1765704   | 8494   | 2  | 0.807047  | 0.115698 | 1756096   | 1758327   | 1762058   | 1797301  |
| 118 NA18517 | [2515685 chr3 | 3 | 46770617  | 46825913  | 55297  | 13 | -0.793838 | 0.042339 | 46770172  | 46771063  | 46825497  | 46826331 |
| 119 NA18517 | [2515685 chr3 | 3 | 47798575  | 47799322  | 748    | 3  | 0.521971  | 0.083168 | 47798501  | 47798650  | 47799000  | 47799641 |
| 120 NA18517 | [2515685 chr3 | 3 | 82951524  | 82955577  | 4054   | 7  | -0.829801 | 0.061789 | 82951325  | 82951723  | 82955245  | 82955901 |
| 121 NA18517 | [2515685 chr3 | 3 | 109186593 | 109190807 | 4215   | 5  | -0.389018 | 0.0698   | 109185785 | 109187401 | 109190527 | 10919109 |
| 122 NA18517 | [2515685 chr3 | 3 | 116139491 | 116150620 | 11130  | 12 | -4.816957 | 0.102632 | 116137943 | 116141040 | 116146974 | 11615548 |
| 123 NA18517 | [2515685 chr3 | 3 | 117753310 | 117754289 | 980    | 2  | -0.637043 | 0.100131 | 117753094 | 117753526 | 117754096 | 11775448 |

|             |               |   |           |           |        |     |           |          |           |           |           |          |
|-------------|---------------|---|-----------|-----------|--------|-----|-----------|----------|-----------|-----------|-----------|----------|
| 124 NA18517 | [2515685 chr3 | 3 | 127155218 | 127158873 | 3656   | 6   | -0.521431 | 0.059577 | 127155047 | 127155390 | 127158237 | 12715950 |
| 125 NA18517 | [2515685 chr3 | 3 | 139315695 | 139316879 | 1185   | 2   | 0.620314  | 0.109531 | 139315497 | 139315894 | 139316463 | 13931729 |
| 126 NA18517 | [2515685 chr3 | 3 | 163994592 | 164106273 | 111682 | 106 | 2.444511  | 0.026248 | 163993392 | 163995793 | 164106029 | 16410651 |
| 127 NA18517 | [2515685 chr3 | 3 | 164199936 | 164205886 | 5951   | 6   | -0.676146 | 0.069964 | 164199686 | 164200187 | 164204674 | 16420709 |
| 128 NA18517 | [2515685 chr3 | 3 | 191219813 | 191223326 | 3514   | 4   | 0.769828  | 0.078865 | 191219291 | 191220336 | 191222918 | 19122373 |
| 129 NA18517 | [2515685 chr3 | 3 | 192547312 | 192554331 | 7020   | 10  | 0.903579  | 0.052051 | 192546950 | 192547674 | 192554127 | 19255453 |
| 130 NA18517 | [2515685 chr3 | 3 | 194357854 | 194368035 | 10182  | 12  | 2.114498  | 0.070455 | 194357665 | 194358044 | 194367817 | 19436825 |
| 131 NA18517 | [2515685 chr3 | 3 | 196885755 | 196967691 | 81937  | 88  | -0.378808 | 0.016085 | 196885211 | 196886300 | 196967336 | 19696804 |
| 132 NA18517 | [2515685 chr3 | 3 | 196991681 | 196993357 | 1677   | 7   | -0.465442 | 0.06183  | 196991423 | 196991939 | 196993124 | 19699359 |
| 133 NA18517 | [2515685 chr3 | 3 | 197676671 | 197678510 | 1840   | 3   | -0.416597 | 0.078365 | 197676455 | 197676888 | 197678055 | 19767896 |
| 134 NA18517 | [2515685 chr3 | 3 | 198422794 | 198427408 | 4615   | 2   | 1.068088  | 0.1305   | 198422381 | 198423207 | 198423959 | 19843085 |
| 135 NA18517 | [2515685 chr3 | 3 | 198674426 | 198675470 | 1045   | 6   | -0.908101 | 0.054015 | 198674161 | 198674692 | 198674903 | 19867603 |
| 136 NA18517 | [2515685 chr3 | 3 | 198871725 | 198882515 | 10791  | 14  | -0.400027 | 0.040072 | 198871537 | 198871913 | 198882172 | 19888285 |
| 137 NA18517 | [2515685 chr3 | 3 | 199313925 | 199321063 | 7139   | 15  | 2.099206  | 0.039879 | 199313515 | 199314336 | 199320844 | 19932128 |
| 138 NA18517 | [2515685 chr3 | 3 | 199380053 | 199387297 | 7245   | 8   | -0.319233 | 0.05349  | 199377257 | 199382849 | 199384743 | 19938985 |
| 139 NA18517 | [2515685 chr4 | 4 | 639659    | 640828    | 1170   | 2   | 0.710641  | 0.12172  | 639291    | 640028    | 640478    | 641178   |
| 140 NA18517 | [2515685 chr4 | 4 | 728045    | 731845    | 3801   | 2   | 0.580394  | 0.104092 | 727736    | 728355    | 731532    | 732155   |
| 141 NA18517 | [2515685 chr4 | 4 | 1591116   | 1594135   | 3020   | 4   | -0.39708  | 0.077738 | 1590877   | 1591355   | 1593726   | 159454   |
| 142 NA18517 | [2515685 chr4 | 4 | 3504800   | 3511165   | 6366   | 8   | 0.377388  | 0.051861 | 3504307   | 3505294   | 3510945   | 351138   |
| 143 NA18517 | [2515685 chr4 | 4 | 3714193   | 3715251   | 1059   | 2   | 0.691557  | 0.116204 | 3713862   | 3714524   | 3714881   | 371562   |
| 144 NA18517 | [2515685 chr4 | 4 | 3906895   | 3909675   | 2781   | 3   | -0.602875 | 0.094593 | 3906487   | 3907303   | 3909318   | 391003   |
| 145 NA18517 | [2515685 chr4 | 4 | 9299469   | 9308037   | 8569   | 6   | -0.582936 | 0.065751 | 9295439   | 9302535   | 9306599   | 930947   |
| 146 NA18517 | [2515685 chr4 | 4 | 9812346   | 9813108   | 763    | 33  | 0.670086  | 0.022292 | 9812284   | 9812408   | 9812952   | 981326   |
| 147 NA18517 | [2515685 chr4 | 4 | 9887220   | 9911397   | 24178  | 31  | 1.982102  | 0.042819 | 9886886   | 9887555   | 9910388   | 991240   |
| 148 NA18517 | [2515685 chr4 | 4 | 10028422  | 10029595  | 1174   | 2   | 0.723446  | 0.110047 | 10028055  | 10028790  | 10029250  | 1002994  |
| 149 NA18517 | [2515685 chr4 | 4 | 42543240  | 42546856  | 3617   | 2   | 1.06096   | 0.105577 | 42538590  | 42546306  | 42546636  | 4254707  |
| 150 NA18517 | [2515685 chr4 | 4 | 49400316  | 49422181  | 21866  | 41  | -0.250957 | 0.022206 | 49400246  | 49400386  | 49422125  | 4942223  |
| 151 NA18517 | [2515685 chr4 | 4 | 57901280  | 57903031  | 1752   | 3   | -0.472294 | 0.088325 | 57901002  | 57901559  | 57902705  | 5790335  |
| 152 NA18517 | [2515685 chr4 | 4 | 68618560  | 68840074  | 221515 | 223 | 0.560202  | 0.010073 | 68618281  | 68618839  | 68837008  | 6884465  |
| 153 NA18517 | [2515685 chr4 | 4 | 69169621  | 69171347  | 1727   | 2   | 0.522952  | 0.10259  | 69169451  | 69169792  | 69171038  | 6917165  |
| 154 NA18517 | [2515685 chr4 | 4 | 69202095  | 69319814  | 117720 | 71  | 1.180407  | 0.023716 | 69201955  | 69202236  | 69319569  | 6932005  |
| 155 NA18517 | [2515685 chr4 | 4 | 69319814  | 69341211  | 21398  | 18  | 0.334829  | 0.020434 | 69319569  | 69320059  | 69340966  | 6934145  |
| 156 NA18517 | [2515685 chr4 | 4 | 69347741  | 69365270  | 17530  | 21  | 0.334829  | 0.020434 | 69347112  | 69348370  | 69365129  | 6936541  |
| 157 NA18517 | [2515685 chr4 | 4 | 69672033  | 69693234  | 21202  | 23  | 0.323081  | 0.019221 | 69671975  | 69672092  | 69692988  | 6969348  |
| 158 NA18517 | [2515685 chr4 | 4 | 69701351  | 69717280  | 15930  | 22  | 0.323081  | 0.019221 | 69701125  | 69701577  | 69717139  | 6971742  |
| 159 NA18517 | [2515685 chr4 | 4 | 70308233  | 70309023  | 791    | 2   | 0.662196  | 0.101874 | 70308195  | 70308271  | 70308580  | 7030946  |
| 160 NA18517 | [2515685 chr4 | 4 | 70328730  | 70418275  | 89546  | 87  | 0.572022  | 0.016735 | 70328526  | 70328934  | 70418083  | 7041846  |
| 161 NA18517 | [2515685 chr4 | 4 | 78137863  | 78147342  | 9480   | 11  | -0.784565 | 0.044982 | 78135441  | 78140286  | 78144520  | 7815016  |
| 162 NA18517 | [2515685 chr4 | 4 | 115865203 | 115869481 | 4279   | 3   | -0.767879 | 0.098505 | 115864913 | 115865494 | 115866415 | 11587556 |
| 163 NA18517 | [2515685 chr4 | 4 | 132848421 | 132851466 | 3046   | 4   | -0.821577 | 0.081094 | 132847980 | 132848862 | 132851018 | 13285191 |
| 164 NA18517 | [2515685 chr4 | 4 | 133536192 | 133540723 | 4532   | 3   | -0.763888 | 0.0997   | 133531398 | 133539258 | 133540462 | 13354098 |
| 165 NA18517 | [2515685 chr4 | 4 | 138449561 | 138457787 | 8227   | 7   | -0.945163 | 0.060884 | 138448993 | 138450130 | 138457283 | 13845829 |
| 166 NA18517 | [2515685 chr4 | 4 | 138537751 | 138549906 | 12156  | 14  | 0.987906  | 0.045418 | 138537443 | 138538059 | 138547414 | 13855239 |
| 167 NA18517 | [2515685 chr4 | 4 | 142588136 | 142590500 | 2365   | 4   | -2.671186 | 0.123021 | 142587774 | 142588498 | 142590303 | 14259069 |
| 168 NA18517 | [2515685 chr4 | 4 | 145241837 | 145245588 | 3752   | 3   | -0.724054 | 0.099969 | 145241488 | 145242187 | 145245192 | 14524598 |
| 169 NA18517 | [2515685 chr4 | 4 | 161809951 | 161817907 | 7957   | 8   | 0.301258  | 0.055908 | 161809585 | 161810318 | 161817656 | 16181815 |
| 170 NA18517 | [2515685 chr4 | 4 | 162237272 | 162242562 | 5291   | 8   | 1.108665  | 0.055881 | 162236487 | 162238058 | 162242381 | 16224274 |
| 171 NA18517 | [2515685 chr4 | 4 | 169184442 | 169368370 | 183929 | 162 | 0.839392  | 0.012372 | 169184090 | 169184794 | 169366713 | 16937002 |
| 172 NA18517 | [2515685 chr4 | 4 | 172750241 | 172755216 | 4976   | 2   | 0.930162  | 0.124195 | 172748887 | 172751596 | 172753256 | 17275717 |
| 173 NA18517 | [2515685 chr4 | 4 | 173363594 | 173367718 | 4125   | 6   | -0.729231 | 0.062042 | 173362583 | 173364606 | 173367283 | 17336815 |
| 174 NA18517 | [2515685 chr4 | 4 | 173799832 | 173807321 | 7490   | 6   | 0.925096  | 0.068745 | 173799464 | 173800201 | 173804255 | 17381134 |
| 175 NA18517 | [2515685 chr4 | 4 | 178967213 | 178988373 | 21161  | 19  | -0.823651 | 0.03813  | 178965065 | 178969361 | 178985307 | 17899157 |
| 176 NA18517 | [2515685 chr4 | 4 | 181510330 | 181514063 | 3734   | 5   | -0.75482  | 0.071487 | 181509772 | 181510889 | 181513677 | 18151444 |
| 177 NA18517 | [2515685 chr4 | 4 | 185532106 | 185534552 | 2447   | 3   | 0.610195  | 0.095629 | 185531516 | 185532696 | 185534150 | 18553495 |
| 178 NA18517 | [2515685 chr4 | 4 | 185535274 | 185544849 | 9576   | 9   | 1.021793  | 0.053216 | 185534955 | 185535593 | 185543276 | 18554642 |



|             |               |   |           |           |        |     |           |          |           |           |           |           |
|-------------|---------------|---|-----------|-----------|--------|-----|-----------|----------|-----------|-----------|-----------|-----------|
| 179 NA18517 | [2515685 chr4 | 4 | 186816951 | 186819359 | 2409   | 3   | 2.929586  | 0.164919 | 186816420 | 186817483 | 186819049 | 186819671 |
| 180 NA18517 | [2515685 chr4 | 4 | 187728494 | 187732907 | 4414   | 15  | 1.479618  | 0.046446 | 187728193 | 187728795 | 187732541 | 187733271 |
| 181 NA18517 | [2515685 chr4 | 4 | 188255523 | 188269680 | 14158  | 235 | -0.333151 | 0.009199 | 188255215 | 188255831 | 188269403 | 188269955 |
| 182 NA18517 | [2515685 chr4 | 4 | 190505080 | 190507546 | 2467   | 4   | 0.408029  | 0.078699 | 190504850 | 190505311 | 190507099 | 190507991 |
| 183 NA18517 | [2515685 chr4 | 4 | 190528602 | 190533163 | 4562   | 21  | -2.811634 | 0.048299 | 190528058 | 190529146 | 190531664 | 190534466 |
| 184 NA18517 | [2515685 chr4 | 4 | 190787072 | 190788359 | 1288   | 4   | -0.550701 | 0.079336 | 190786744 | 190787401 | 190788061 | 190788665 |
| 185 NA18517 | [2515685 chr4 | 4 | 190845771 | 191059687 | 213917 | 220 | 0.318007  | 0.009846 | 190845056 | 190846486 | 191059242 | 191060131 |
| 186 NA18517 | [2515685 chr4 | 4 | 191142404 | 191143596 | 1193   | 3   | 0.55269   | 0.084642 | 191142135 | 191142673 | 191143215 | 191143997 |
| 187 NA18517 | [2515685 chr5 | 5 | 104264    | 105617    | 1354   | 2   | 0.613031  | 0.107991 | 104036    | 104493    | 105236    | 105995    |
| 188 NA18517 | [2515685 chr5 | 5 | 318840    | 321498    | 2659   | 3   | -0.442343 | 0.086629 | 318400    | 319280    | 321104    | 321895    |
| 189 NA18517 | [2515685 chr5 | 5 | 450108    | 451856    | 1749   | 3   | -0.464763 | 0.08349  | 449788    | 450429    | 451559    | 452155    |
| 190 NA18517 | [2515685 chr5 | 5 | 576523    | 577630    | 1108   | 2   | 0.551055  | 0.109492 | 576202    | 576844    | 577267    | 577994    |
| 191 NA18517 | [2515685 chr5 | 5 | 950181    | 953016    | 2836   | 12  | -0.352946 | 0.036968 | 949756    | 950607    | 952851    | 953182    |
| 192 NA18517 | [2515685 chr5 | 5 | 1075284   | 1079920   | 4637   | 24  | 0.326605  | 0.027561 | 1074709   | 1075859   | 1079566   | 1080271   |
| 193 NA18517 | [2515685 chr5 | 5 | 1122995   | 1126517   | 3523   | 38  | 0.591301  | 0.022273 | 1122772   | 1123219   | 1126389   | 1126644   |
| 194 NA18517 | [2515685 chr5 | 5 | 1223248   | 1223930   | 683    | 5   | 1.499779  | 0.064145 | 1223057   | 1223439   | 1223854   | 1224007   |
| 195 NA18517 | [2515685 chr5 | 5 | 12853524  | 12854635  | 1112   | 2   | 0.58077   | 0.107862 | 12853179  | 12853869  | 12854258  | 12855017  |
| 196 NA18517 | [2515685 chr5 | 5 | 17552863  | 17566617  | 13755  | 12  | -0.347621 | 0.042401 | 17552460  | 17553266  | 17566406  | 17566821  |
| 197 NA18517 | [2515685 chr5 | 5 | 17570617  | 17643104  | 72488  | 331 | 0.259193  | 0.007446 | 17570551  | 17570684  | 17642455  | 17643751  |
| 198 NA18517 | [2515685 chr5 | 5 | 17643104  | 17663728  | 20625  | 27  | -0.517288 | 0.029672 | 17642455  | 17643754  | 17663473  | 17663981  |
| 199 NA18517 | [2515685 chr5 | 5 | 17664339  | 17666794  | 2456   | 6   | 0.306811  | 0.056969 | 17663984  | 17664695  | 17666415  | 17667171  |
| 200 NA18517 | [2515685 chr5 | 5 | 17667407  | 17708954  | 41548  | 31  | -0.847989 | 0.027854 | 17667174  | 17667641  | 17708701  | 17709207  |
| 201 NA18517 | [2515685 chr5 | 5 | 19410747  | 19412172  | 1426   | 3   | 0.867296  | 0.088469 | 19410189  | 19411305  | 19411980  | 19412361  |
| 202 NA18517 | [2515685 chr5 | 5 | 20456131  | 20463668  | 7538   | 2   | -0.902661 | 0.112082 | 20454382  | 20457881  | 20462468  | 20464861  |
| 203 NA18517 | [2515685 chr5 | 5 | 21307535  | 21389647  | 82113  | 133 | 0.601912  | 0.012331 | 21307127  | 21307943  | 21389559  | 21389731  |
| 204 NA18517 | [2515685 chr5 | 5 | 21389647  | 21426153  | 36507  | 50  | 0.270438  | 0.019922 | 21389559  | 21389736  | 21425562  | 21426741  |
| 205 NA18517 | [2515685 chr5 | 5 | 21483394  | 21488147  | 4754   | 4   | -0.788023 | 0.073265 | 21480817  | 21485972  | 21487855  | 21488431  |
| 206 NA18517 | [2515685 chr5 | 5 | 21971730  | 21975387  | 3658   | 8   | 0.512763  | 0.047522 | 21971258  | 21972202  | 21975163  | 21975617  |
| 207 NA18517 | [2515685 chr5 | 5 | 22161493  | 22166561  | 5069   | 6   | 0.606391  | 0.065142 | 22160580  | 22162407  | 22166502  | 22166621  |
| 208 NA18517 | [2515685 chr5 | 5 | 26831997  | 26835654  | 3658   | 3   | -3.014385 | 0.154808 | 26829858  | 26834136  | 26835377  | 26835931  |
| 209 NA18517 | [2515685 chr5 | 5 | 26835654  | 26837938  | 2285   | 3   | -0.865013 | 0.112858 | 26835377  | 26835932  | 26837469  | 26838401  |
| 210 NA18517 | [2515685 chr5 | 5 | 34214373  | 34223667  | 9295   | 24  | -0.293503 | 0.028243 | 34214196  | 34214550  | 34222107  | 34225221  |
| 211 NA18517 | [2515685 chr5 | 5 | 34232271  | 34242460  | 10190  | 19  | 0.3546    | 0.013478 | 34231243  | 34233300  | 34242396  | 34242521  |
| 212 NA18517 | [2515685 chr5 | 5 | 34243324  | 34292673  | 49350  | 82  | 0.3546    | 0.013478 | 34243277  | 34243371  | 34291585  | 34293761  |
| 213 NA18517 | [2515685 chr5 | 5 | 68865273  | 68998995  | 133723 | 266 | 0.384832  | 0.002249 | 68864770  | 68865776  | 68998931  | 68999051  |
| 214 NA18517 | [2515685 chr5 | 5 | 69000288  | 69226683  | 226396 | 516 | 0.384832  | 0.002249 | 68999812  | 69000764  | 69226508  | 69226851  |
| 215 NA18517 | [2515685 chr5 | 5 | 69569414  | 69578736  | 9323   | 22  | 0.384832  | 0.002249 | 69569234  | 69569595  | 69578672  | 69578801  |
| 216 NA18517 | [2515685 chr5 | 5 | 69580029  | 69817505  | 237477 | 482 | 0.384832  | 0.002249 | 69579553  | 69580505  | 69816360  | 69818651  |
| 217 NA18517 | [2515685 chr5 | 5 | 69865798  | 69875100  | 9303   | 22  | 0.384832  | 0.002249 | 69865618  | 69865979  | 69875036  | 69875161  |
| 218 NA18517 | [2515685 chr5 | 5 | 69876393  | 70102565  | 226173 | 486 | 0.384832  | 0.002249 | 69875917  | 69876869  | 70102390  | 70102741  |
| 219 NA18517 | [2515685 chr5 | 5 | 70195200  | 70291723  | 96524  | 105 | 0.384832  | 0.002249 | 70194720  | 70195680  | 70287456  | 70294911  |
| 220 NA18517 | [2515685 chr5 | 5 | 70303574  | 70426481  | 122908 | 200 | 0.384832  | 0.002249 | 70303355  | 70303794  | 70425273  | 70427681  |
| 221 NA18517 | [2515685 chr5 | 5 | 70447838  | 70461691  | 13854  | 22  | 0.384832  | 0.002249 | 70446675  | 70449001  | 70461427  | 70461951  |
| 222 NA18517 | [2515685 chr5 | 5 | 70569756  | 70579062  | 9307   | 22  | 0.384832  | 0.002249 | 70569576  | 70569937  | 70578998  | 70579121  |
| 223 NA18517 | [2515685 chr5 | 5 | 70580346  | 70696078  | 115733 | 254 | 0.384832  | 0.002249 | 70579879  | 70580814  | 70695658  | 70696491  |
| 224 NA18517 | [2515685 chr5 | 5 | 81459212  | 81466056  | 6845   | 2   | -1.49403  | 0.125414 | 81455614  | 81462405  | 81462863  | 81470281  |
| 225 NA18517 | [2515685 chr5 | 5 | 93928460  | 93933101  | 4642   | 4   | -0.398223 | 0.078696 | 93927706  | 93929215  | 93931984  | 93934211  |
| 226 NA18517 | [2515685 chr5 | 5 | 99408801  | 99419037  | 10237  | 14  | -0.619252 | 0.040798 | 99408605  | 99408997  | 99418328  | 99419741  |
| 227 NA18517 | [2515685 chr5 | 5 | 99737846  | 99748773  | 10928  | 21  | -0.254289 | 0.031412 | 99737509  | 99738184  | 99748671  | 99748871  |
| 228 NA18517 | [2515685 chr5 | 5 | 109794290 | 109801944 | 7655   | 5   | -0.395324 | 0.071619 | 109793976 | 109794605 | 109801781 | 109802101 |
| 229 NA18517 | [2515685 chr5 | 5 | 137835848 | 137844134 | 8287   | 7   | 0.620319  | 0.060352 | 137835611 | 137836085 | 137843310 | 137844951 |
| 230 NA18517 | [2515685 chr5 | 5 | 140203081 | 140218928 | 15848  | 20  | 2.126425  | 0.052875 | 140202344 | 140203819 | 140218508 | 140219341 |
| 231 NA18517 | [2515685 chr5 | 5 | 140534849 | 140540106 | 5258   | 5   | 0.568315  | 0.066624 | 140534700 | 140534999 | 140539007 | 140541201 |
| 232 NA18517 | [2515685 chr5 | 5 | 150183322 | 150203801 | 20480  | 11  | -0.71637  | 0.047774 | 150181427 | 150185218 | 150203451 | 150204151 |
| 233 NA18517 | [2515685 chr5 | 5 | 155408303 | 155424012 | 15710  | 11  | -0.837749 | 0.050054 | 155405622 | 155410984 | 155420819 | 155427611 |

|             |               |   |           |           |        |     |           |          |           |           |           |          |
|-------------|---------------|---|-----------|-----------|--------|-----|-----------|----------|-----------|-----------|-----------|----------|
| 234 NA18517 | [2515685 chr5 | 5 | 165771312 | 165775934 | 4623   | 3   | -0.7846   | 0.088669 | 165771092 | 165771533 | 165772741 | 16586086 |
| 235 NA18517 | [2515685 chr5 | 5 | 175278638 | 175283031 | 4394   | 4   | -0.344467 | 0.065748 | 175278310 | 175278967 | 175281697 | 17528436 |
| 236 NA18517 | [2515685 chr5 | 5 | 175486904 | 175494343 | 7440   | 12  | 0.303859  | 0.043057 | 175486535 | 175487273 | 175494030 | 17549465 |
| 237 NA18517 | [2515685 chr5 | 5 | 175494840 | 175546638 | 51799  | 72  | 0.546192  | 0.017683 | 175494657 | 175495023 | 175546435 | 17554684 |
| 238 NA18517 | [2515685 chr5 | 5 | 175556984 | 175565634 | 8651   | 12  | 0.285586  | 0.041887 | 175556284 | 175557685 | 175564408 | 17556686 |
| 239 NA18517 | [2515685 chr5 | 5 | 180275137 | 180280228 | 5092   | 5   | 0.585585  | 0.073265 | 180273651 | 180276623 | 180277035 | 18028376 |
| 240 NA18517 | [2515685 chr5 | 5 | 180309236 | 180363417 | 54182  | 53  | 0.558267  | 0.02108  | 180309103 | 180309370 | 180363120 | 18036371 |
| 241 NA18517 | [2515685 chr5 | 5 | 180418059 | 180419113 | 1055   | 2   | 0.731475  | 0.125398 | 180417894 | 180418224 | 180418598 | 18041962 |
| 242 NA18517 | [2515685 chr6 | 6 | 201823    | 324395    | 122573 | 125 | 0.362546  | 0.013125 | 201415    | 202232    | 323926    | 324865   |
| 243 NA18517 | [2515685 chr6 | 6 | 26847749  | 26853477  | 5729   | 8   | 0.533252  | 0.053441 | 26846249  | 26849250  | 26853185  | 26853771 |
| 244 NA18517 | [2515685 chr6 | 6 | 26855748  | 26865693  | 9946   | 19  | 0.333646  | 0.034811 | 26855426  | 26856071  | 26865649  | 26865737 |
| 245 NA18517 | [2515685 chr6 | 6 | 26960263  | 26969868  | 9606   | 20  | -0.272241 | 0.031671 | 26959735  | 26960792  | 26968311  | 26971421 |
| 246 NA18517 | [2515685 chr6 | 6 | 26978860  | 27053013  | 74154  | 123 | 0.367957  | 0.011409 | 26977811  | 26979909  | 27052483  | 27053547 |
| 247 NA18517 | [2515685 chr6 | 6 | 27061216  | 27078178  | 16963  | 24  | 0.367957  | 0.011409 | 27059879  | 27062553  | 27077814  | 27078547 |
| 248 NA18517 | [2515685 chr6 | 6 | 29958572  | 30011802  | 53231  | 50  | 0.486915  | 0.022017 | 29957670  | 29959474  | 30011083  | 30012527 |
| 249 NA18517 | [2515685 chr6 | 6 | 31383567  | 31386100  | 2534   | 3   | -0.916635 | 0.10023  | 31383185  | 31383949  | 31385806  | 31386391 |
| 250 NA18517 | [2515685 chr6 | 6 | 32087217  | 32092438  | 5222   | 10  | -0.282206 | 0.043213 | 32086984  | 32087451  | 32092139  | 32092737 |
| 251 NA18517 | [2515685 chr6 | 6 | 32539488  | 32544819  | 5332   | 2   | -1.203002 | 0.128198 | 32539084  | 32539892  | 32543082  | 32546557 |
| 252 NA18517 | [2515685 chr6 | 6 | 32547042  | 32549693  | 2652   | 5   | 0.465716  | 0.067718 | 32546557  | 32547528  | 32549372  | 32550017 |
| 253 NA18517 | [2515685 chr6 | 6 | 32556275  | 32557476  | 1202   | 3   | -0.509276 | 0.081407 | 32556081  | 32556470  | 32557305  | 32557647 |
| 254 NA18517 | [2515685 chr6 | 6 | 32565102  | 32586862  | 21761  | 3   | -3.036315 | 0.25067  | 32564888  | 32565316  | 32586127  | 32587597 |
| 255 NA18517 | [2515685 chr6 | 6 | 32593630  | 32594760  | 1131   | 2   | 0.567803  | 0.099154 | 32593179  | 32594082  | 32594571  | 32594947 |
| 256 NA18517 | [2515685 chr6 | 6 | 32596109  | 32600645  | 4537   | 8   | -0.45784  | 0.073179 | 32595932  | 32596286  | 32600300  | 32600991 |
| 257 NA18517 | [2515685 chr6 | 6 | 32605125  | 32605958  | 834    | 2   | -3.203123 | 0.20539  | 32604923  | 32605328  | 32605760  | 32606151 |
| 258 NA18517 | [2515685 chr6 | 6 | 32605958  | 32609675  | 3718   | 4   | -0.357691 | 0.070822 | 32605760  | 32606156  | 32609518  | 32609837 |
| 259 NA18517 | [2515685 chr6 | 6 | 32631127  | 32632349  | 1223   | 2   | -1.859986 | 0.164406 | 32630911  | 32631343  | 32632089  | 32632611 |
| 260 NA18517 | [2515685 chr6 | 6 | 32644822  | 32651918  | 7097   | 5   | 0.815276  | 0.089561 | 32644460  | 32645184  | 32651147  | 32652681 |
| 261 NA18517 | [2515685 chr6 | 6 | 32653862  | 32655482  | 1621   | 3   | 1.545058  | 0.128074 | 32653679  | 32654046  | 32654980  | 32655987 |
| 262 NA18517 | [2515685 chr6 | 6 | 32661503  | 32664861  | 3359   | 2   | 0.594303  | 0.103407 | 32660912  | 32662094  | 32663824  | 32665891 |
| 263 NA18517 | [2515685 chr6 | 6 | 32666229  | 32667673  | 1445   | 3   | 1.035296  | 0.08772  | 32665899  | 32666560  | 32667507  | 32667837 |
| 264 NA18517 | [2515685 chr6 | 6 | 32672888  | 32680751  | 7864   | 7   | 0.455138  | 0.05928  | 32672612  | 32673164  | 32680547  | 32680951 |
| 265 NA18517 | [2515685 chr6 | 6 | 32702716  | 32705737  | 3022   | 3   | -0.542022 | 0.080776 | 32702285  | 32703148  | 32704019  | 32707451 |
| 266 NA18517 | [2515685 chr6 | 6 | 32733468  | 32735351  | 1884   | 3   | -0.445091 | 0.084394 | 32732792  | 32734144  | 32734985  | 32735711 |
| 267 NA18517 | [2515685 chr6 | 6 | 32735351  | 32736908  | 1558   | 3   | 0.448744  | 0.08489  | 32734985  | 32735718  | 32736724  | 32737097 |
| 268 NA18517 | [2515685 chr6 | 6 | 32741849  | 32744343  | 2495   | 4   | 0.751775  | 0.082894 | 32741631  | 32742067  | 32744136  | 32744551 |
| 269 NA18517 | [2515685 chr6 | 6 | 35862833  | 35874426  | 11594  | 13  | 1.00486   | 0.043442 | 35862530  | 35863136  | 35873957  | 35874891 |
| 270 NA18517 | [2515685 chr6 | 6 | 54036900  | 54042384  | 5485   | 5   | 3.698362  | 0.140741 | 54036573  | 54037227  | 54041771  | 54042991 |
| 271 NA18517 | [2515685 chr6 | 6 | 58247040  | 58256195  | 9156   | 13  | 0.252493  | 0.041412 | 58246670  | 58247311  | 58256051  | 58256337 |
| 272 NA18517 | [2515685 chr6 | 6 | 75676921  | 75677837  | 917    | 2   | -0.546992 | 0.091186 | 75676717  | 75677126  | 75677526  | 75678141 |
| 273 NA18517 | [2515685 chr6 | 6 | 77495034  | 77513512  | 18479  | 12  | 0.784032  | 0.047821 | 77493568  | 77496500  | 77510011  | 77517697 |
| 274 NA18517 | [2515685 chr6 | 6 | 78933709  | 78953035  | 19327  | 15  | -0.80745  | 0.040674 | 78933465  | 78933954  | 78949534  | 78962007 |
| 275 NA18517 | [2515685 chr6 | 6 | 79023318  | 79093263  | 69946  | 70  | 0.858182  | 0.019006 | 79022028  | 79024609  | 79091909  | 79094611 |
| 276 NA18517 | [2515685 chr6 | 6 | 103844685 | 103871201 | 26517  | 17  | 2.93866   | 0.065938 | 103844347 | 103845023 | 103868241 | 10387416 |
| 277 NA18517 | [2515685 chr6 | 6 | 115167422 | 115171402 | 3981   | 4   | -0.391881 | 0.071028 | 115166330 | 115168514 | 115170332 | 11517247 |
| 278 NA18517 | [2515685 chr6 | 6 | 115432117 | 115433350 | 1234   | 2   | -0.52236  | 0.10343  | 115431837 | 115432397 | 115432887 | 11543381 |
| 279 NA18517 | [2515685 chr6 | 6 | 115446833 | 115452059 | 5227   | 5   | -0.54971  | 0.071448 | 115446601 | 115447066 | 115451701 | 11545241 |
| 280 NA18517 | [2515685 chr6 | 6 | 120671191 | 120671916 | 726    | 2   | 1.231131  | 0.111272 | 120670696 | 120671686 | 120671725 | 12067210 |
| 281 NA18517 | [2515685 chr6 | 6 | 160056728 | 160058998 | 2271   | 2   | -0.845463 | 0.098043 | 160055808 | 160057648 | 160058322 | 16005967 |
| 282 NA18517 | [2515685 chr6 | 6 | 161001907 | 161038394 | 36488  | 62  | 0.395469  | 0.016672 | 161001167 | 161002648 | 161038184 | 16103860 |
| 283 NA18517 | [2515685 chr6 | 6 | 162821530 | 162823040 | 1511   | 2   | -0.634748 | 0.102771 | 162821109 | 162821951 | 162822743 | 16282333 |
| 284 NA18517 | [2515685 chr6 | 6 | 162893670 | 162896314 | 2645   | 3   | -0.472088 | 0.081299 | 162893373 | 162893968 | 162895355 | 16289727 |
| 285 NA18517 | [2515685 chr6 | 6 | 168453011 | 168456762 | 3752   | 3   | 0.634228  | 0.084176 | 168452611 | 168453411 | 168456200 | 16845732 |
| 286 NA18517 | [2515685 chr6 | 6 | 169340176 | 169347270 | 7095   | 30  | 1.214357  | 0.028297 | 169335703 | 169343677 | 169347209 | 16934733 |
| 287 NA18517 | [2515685 chr6 | 6 | 170625506 | 170627028 | 1523   | 3   | 1.233133  | 0.106789 | 170625015 | 170625997 | 170626579 | 17062747 |
| 288 NA18517 | [2515685 chr6 | 6 | 170683934 | 170686670 | 2737   | 6   | -0.324637 | 0.064566 | 170683699 | 170684170 | 170686470 | 17068687 |

|             |               |   |           |           |        |     |           |          |           |           |           |           |
|-------------|---------------|---|-----------|-----------|--------|-----|-----------|----------|-----------|-----------|-----------|-----------|
| 289 NA18517 | [2515685 chr6 | 6 | 170692529 | 170694780 | 2252   | 13  | 0.393003  | 0.037392 | 170692183 | 170692876 | 170694493 | 17069506  |
| 290 NA18517 | [2515685 chr6 | 6 | 170721483 | 170723478 | 1996   | 10  | -0.640524 | 0.051963 | 170721218 | 170721749 | 170723334 | 17072362  |
| 291 NA18517 | [2515685 chr7 | 7 | 113212    | 116281    | 3070   | 13  | -0.373712 | 0.044939 | 113146    | 113279    | 116273    | 116290    |
| 292 NA18517 | [2515685 chr7 | 7 | 135982    | 164196    | 28215  | 29  | 0.335646  | 0.027776 | 135556    | 136408    | 163674    | 164718    |
| 293 NA18517 | [2515685 chr7 | 7 | 929017    | 930663    | 1647   | 5   | -0.825807 | 0.069052 | 928626    | 929408    | 930382    | 930945    |
| 294 NA18517 | [2515685 chr7 | 7 | 3384111   | 3392457   | 8347   | 8   | 0.906462  | 0.057143 | 3383451   | 3384772   | 3390107   | 339561!   |
| 295 NA18517 | [2515685 chr7 | 7 | 14068075  | 14072254  | 4180   | 5   | 0.397977  | 0.067989 | 14067769  | 14068382  | 14071722  | 1407278   |
| 296 NA18517 | [2515685 chr7 | 7 | 22910927  | 22919105  | 8179   | 6   | -0.467037 | 0.063178 | 22904102  | 22913277  | 22918677  | 2291953:  |
| 297 NA18517 | [2515685 chr7 | 7 | 43775620  | 43789873  | 14254  | 17  | 0.390919  | 0.03482  | 43775434  | 43775807  | 43789550  | 4379019!  |
| 298 NA18517 | [2515685 chr7 | 7 | 62122229  | 62128473  | 6245   | 16  | -0.397354 | 0.038253 | 62122104  | 62122354  | 62128063  | 6212888:  |
| 299 NA18517 | [2515685 chr7 | 7 | 62254472  | 62255088  | 617    | 4   | 0.817355  | 0.07761  | 62254309  | 62254635  | 62254924  | 6225525:  |
| 300 NA18517 | [2515685 chr7 | 7 | 62258673  | 62258943  | 271    | 2   | -0.957426 | 0.103206 | 62258497  | 62258850  | 62258883  | 6225900:  |
| 301 NA18517 | [2515685 chr7 | 7 | 62298225  | 62298494  | 270    | 2   | -0.957425 | 0.103206 | 62298165  | 62298285  | 62298318  | 6229867   |
| 302 NA18517 | [2515685 chr7 | 7 | 62302079  | 62302696  | 618    | 4   | 0.81736   | 0.077611 | 62301915  | 62302243  | 62302533  | 6230285!  |
| 303 NA18517 | [2515685 chr7 | 7 | 62423752  | 62431487  | 7736   | 19  | -0.464522 | 0.035124 | 62423322  | 62424183  | 62431266  | 6243170!  |
| 304 NA18517 | [2515685 chr7 | 7 | 64053836  | 64079765  | 25930  | 40  | -0.316376 | 0.021667 | 64053642  | 64054030  | 64078845  | 6408068!  |
| 305 NA18517 | [2515685 chr7 | 7 | 64429730  | 64455257  | 25528  | 39  | -0.324988 | 0.022009 | 64428756  | 64430705  | 64454989  | 6445552!  |
| 306 NA18517 | [2515685 chr7 | 7 | 64465918  | 64481591  | 15674  | 41  | -0.263654 | 0.022605 | 64465644  | 64466192  | 64481417  | 6448176!  |
| 307 NA18517 | [2515685 chr7 | 7 | 64538610  | 64554832  | 16223  | 43  | -0.274588 | 0.022008 | 64537873  | 64539348  | 64554559  | 6455510!  |
| 308 NA18517 | [2515685 chr7 | 7 | 64565045  | 64590991  | 25947  | 43  | -0.318603 | 0.020919 | 64564855  | 64565236  | 64590084  | 6459189!  |
| 309 NA18517 | [2515685 chr7 | 7 | 64690171  | 64725545  | 35375  | 39  | 0.413739  | 0.023254 | 64689761  | 64690582  | 64725209  | 6472588:  |
| 310 NA18517 | [2515685 chr7 | 7 | 69866390  | 69869623  | 3234   | 4   | 0.795988  | 0.082846 | 69865412  | 69867368  | 69869269  | 6986997!  |
| 311 NA18517 | [2515685 chr7 | 7 | 69869623  | 69871056  | 1434   | 2   | 3.836469  | 0.195852 | 69869269  | 69869978  | 69870420  | 6987169:  |
| 312 NA18517 | [2515685 chr7 | 7 | 72014016  | 72014871  | 856    | 3   | 0.6936    | 0.076743 | 72013991  | 72014042  | 72014598  | 7201514:  |
| 313 NA18517 | [2515685 chr7 | 7 | 73823778  | 73824413  | 636    | 3   | 0.681757  | 0.08162  | 73823755  | 73823801  | 73824363  | 7382446:  |
| 314 NA18517 | [2515685 chr7 | 7 | 74096901  | 74097754  | 854    | 3   | 0.6936    | 0.076743 | 74096630  | 74097173  | 74097729  | 7409778!  |
| 315 NA18517 | [2515685 chr7 | 7 | 74511185  | 74511943  | 759    | 3   | 0.693605  | 0.076743 | 74511009  | 74511362  | 74511918  | 7451196!  |
| 316 NA18517 | [2515685 chr7 | 7 | 75755777  | 75757104  | 1328   | 2   | -0.694514 | 0.104902 | 75755488  | 75756066  | 75756856  | 7575735:  |
| 317 NA18517 | [2515685 chr7 | 7 | 75790452  | 75794984  | 4533   | 5   | -0.763767 | 0.070383 | 75790248  | 75790656  | 75794325  | 7579564:  |
| 318 NA18517 | [2515685 chr7 | 7 | 89455601  | 89456632  | 1032   | 2   | 4.076155  | 0.204758 | 89455373  | 89455830  | 89456225  | 8945703!  |
| 319 NA18517 | [2515685 chr7 | 7 | 92972933  | 92976895  | 3963   | 2   | 1.266285  | 0.131538 | 92972732  | 92973135  | 92975569  | 9297822   |
| 320 NA18517 | [2515685 chr7 | 7 | 99513362  | 99513912  | 551    | 2   | 0.666964  | 0.095863 | 99513133  | 99513592  | 99513623  | 9951420:  |
| 321 NA18517 | [2515685 chr7 | 7 | 101731796 | 101746499 | 14704  | 16  | 0.468827  | 0.034661 | 101731584 | 101732009 | 101745864 | 10174713  |
| 322 NA18517 | [2515685 chr7 | 7 | 101750729 | 101759251 | 8523   | 11  | 0.673521  | 0.039947 | 101750058 | 101751400 | 101759229 | 10175927: |
| 323 NA18517 | [2515685 chr7 | 7 | 101768898 | 101770034 | 1137   | 2   | 0.646119  | 0.090552 | 101768621 | 101769176 | 101769652 | 10177041  |
| 324 NA18517 | [2515685 chr7 | 7 | 101832143 | 101833681 | 1539   | 2   | 0.817639  | 0.106421 | 101831238 | 101833049 | 101833055 | 10183430  |
| 325 NA18517 | [2515685 chr7 | 7 | 101836774 | 101845706 | 8933   | 11  | 0.50965   | 0.041451 | 101836472 | 101837077 | 101845083 | 10184632  |
| 326 NA18517 | [2515685 chr7 | 7 | 101849923 | 101858816 | 8894   | 11  | 0.67352   | 0.039947 | 101849252 | 101850594 | 101858540 | 10185909  |
| 327 NA18517 | [2515685 chr7 | 7 | 101868236 | 101869373 | 1138   | 2   | 0.646119  | 0.090552 | 101867960 | 101868513 | 101868990 | 10186975  |
| 328 NA18517 | [2515685 chr7 | 7 | 101879030 | 101884158 | 5129   | 7   | 0.391667  | 0.054052 | 101878111 | 101879950 | 101883977 | 10188434  |
| 329 NA18517 | [2515685 chr7 | 7 | 109034784 | 109048958 | 14175  | 10  | 1.78355   | 0.067156 | 109024063 | 109037134 | 109046953 | 10905096  |
| 330 NA18517 | [2515685 chr7 | 7 | 125639507 | 125644775 | 5269   | 6   | -0.806517 | 0.073732 | 125639054 | 125639961 | 125644046 | 12564550  |
| 331 NA18517 | [2515685 chr7 | 7 | 133243381 | 133245202 | 1822   | 2   | 0.786899  | 0.105548 | 133243008 | 133243755 | 133244207 | 13324619  |
| 332 NA18517 | [2515685 chr7 | 7 | 133245202 | 133257359 | 12158  | 12  | 2.906936  | 0.079212 | 133244207 | 133246197 | 133255009 | 13326093  |
| 333 NA18517 | [2515685 chr7 | 7 | 141496492 | 141505136 | 8645   | 11  | -0.405375 | 0.043995 | 141495918 | 141497066 | 141504428 | 14150584  |
| 334 NA18517 | [2515685 chr7 | 7 | 141505136 | 141521152 | 16017  | 19  | -1.706069 | 0.050159 | 141504428 | 141505844 | 141520892 | 14152141. |
| 335 NA18517 | [2515685 chr7 | 7 | 141521152 | 141526577 | 5426   | 9   | -0.476015 | 0.047838 | 141520892 | 141521412 | 141526109 | 14152704  |
| 336 NA18517 | [2515685 chr7 | 7 | 141960848 | 141993247 | 32400  | 38  | -0.360009 | 0.023789 | 141960004 | 141961693 | 141992651 | 14199384  |
| 337 NA18517 | [2515685 chr7 | 7 | 143317258 | 143511719 | 194462 | 368 | -0.424367 | 0.007524 | 143316485 | 143318031 | 143511270 | 14351216  |
| 338 NA18517 | [2515685 chr7 | 7 | 149285428 | 149286281 | 854    | 2   | 0.591019  | 0.100508 | 149285181 | 149285676 | 149286217 | 14928634  |
| 339 NA18517 | [2515685 chr7 | 7 | 149300307 | 149319821 | 19515  | 16  | -0.546153 | 0.039393 | 149299905 | 149300710 | 149319432 | 14932021  |
| 340 NA18517 | [2515685 chr7 | 7 | 151356863 | 151396260 | 39398  | 6   | 0.306329  | 0.056653 | 151350573 | 151359213 | 151393910 | 15144986  |
| 341 NA18517 | [2515685 chr7 | 7 | 152921169 | 152938793 | 17625  | 11  | -0.403836 | 0.045717 | 152920786 | 152921552 | 152937448 | 15294013  |
| 342 NA18517 | [2515685 chr7 | 7 | 156976112 | 156978464 | 2353   | 2   | 0.911482  | 0.102312 | 156975812 | 156976413 | 156977896 | 15697903  |
| 343 NA18517 | [2515685 chr7 | 7 | 158617060 | 158624378 | 7319   | 6   | 0.781325  | 0.06661  | 158616763 | 158617357 | 158622028 | 15862672  |

|             |               |   |           |           |        |     |           |          |           |           |           |           |
|-------------|---------------|---|-----------|-----------|--------|-----|-----------|----------|-----------|-----------|-----------|-----------|
| 344 NA18517 | [2515685 chr8 | 8 | 345497    | 346408    | 912    | 2   | 0.889558  | 0.113835 | 345046    | 345949    | 346376    | 346440    |
| 345 NA18517 | [2515685 chr8 | 8 | 1328256   | 1343509   | 15254  | 45  | -0.625881 | 0.020923 | 1327688   | 1328824   | 1342795   | 1344224   |
| 346 NA18517 | [2515685 chr8 | 8 | 1396135   | 1411197   | 15063  | 15  | -0.251819 | 0.039279 | 1395585   | 1396686   | 1410954   | 1411440   |
| 347 NA18517 | [2515685 chr8 | 8 | 2202770   | 2203520   | 751    | 3   | -0.518343 | 0.073935 | 2202506   | 2203034   | 2203382   | 2203654   |
| 348 NA18517 | [2515685 chr8 | 8 | 2238734   | 2253793   | 15060  | 10  | 0.48089   | 0.049557 | 2233839   | 2241488   | 2251039   | 2257524   |
| 349 NA18517 | [2515685 chr8 | 8 | 4110204   | 4112526   | 2323   | 2   | 3.644269  | 0.198456 | 4109692   | 4110717   | 4112031   | 4113024   |
| 350 NA18517 | [2515685 chr8 | 8 | 5200534   | 5205507   | 4974   | 6   | 0.298433  | 0.059453 | 5200167   | 5200902   | 5205163   | 5205854   |
| 351 NA18517 | [2515685 chr8 | 8 | 5582875   | 5594011   | 11137  | 9   | 0.843336  | 0.049083 | 5582615   | 5583135   | 5592820   | 5595203   |
| 352 NA18517 | [2515685 chr8 | 8 | 6817073   | 6866494   | 49422  | 87  | -0.433298 | 0.01464  | 6816809   | 6817338   | 6866269   | 6866714   |
| 353 NA18517 | [2515685 chr8 | 8 | 7146048   | 7158275   | 12228  | 26  | -0.288043 | 0.028493 | 7145836   | 7146261   | 7158119   | 7158434   |
| 354 NA18517 | [2515685 chr8 | 8 | 7169762   | 7172045   | 2284   | 5   | -0.429685 | 0.06665  | 7169579   | 7169945   | 7170788   | 7173304   |
| 355 NA18517 | [2515685 chr8 | 8 | 7197230   | 7391234   | 194005 | 301 | -0.360573 | 0.008493 | 7197173   | 7197288   | 7391061   | 7391407   |
| 356 NA18517 | [2515685 chr8 | 8 | 7669670   | 7814852   | 145183 | 233 | -0.369158 | 0.009614 | 7669496   | 7669844   | 7814687   | 7815014   |
| 357 NA18517 | [2515685 chr8 | 8 | 7878189   | 7880580   | 2392   | 5   | -0.429685 | 0.06665  | 7876934   | 7879444   | 7880287   | 7880873   |
| 358 NA18517 | [2515685 chr8 | 8 | 7895770   | 7902515   | 6746   | 15  | -0.304896 | 0.037471 | 7895655   | 7895886   | 7902043   | 7902984   |
| 359 NA18517 | [2515685 chr8 | 8 | 7950916   | 7953632   | 2717   | 6   | -0.360942 | 0.057005 | 7950711   | 7951122   | 7953355   | 7953904   |
| 360 NA18517 | [2515685 chr8 | 8 | 12034819  | 12064826  | 30008  | 51  | -0.277631 | 0.019146 | 12034665  | 12034973  | 12064663  | 12064984  |
| 361 NA18517 | [2515685 chr8 | 8 | 12304341  | 12314107  | 9767   | 18  | -0.349281 | 0.031249 | 12304245  | 12304438  | 12313944  | 12314271  |
| 362 NA18517 | [2515685 chr8 | 8 | 12446514  | 12449565  | 3052   | 4   | -0.467549 | 0.071065 | 12445978  | 12447051  | 12448402  | 12450724  |
| 363 NA18517 | [2515685 chr8 | 8 | 16245461  | 16251509  | 6049   | 6   | -2.765306 | 0.117242 | 16245129  | 16245794  | 16250812  | 16252207  |
| 364 NA18517 | [2515685 chr8 | 8 | 20022286  | 20024771  | 2486   | 2   | -0.7079   | 0.117998 | 20021082  | 20023491  | 20024338  | 20025204  |
| 365 NA18517 | [2515685 chr8 | 8 | 21832667  | 21833967  | 1301   | 2   | 0.629289  | 0.105772 | 21832108  | 21833227  | 21833678  | 21834257  |
| 366 NA18517 | [2515685 chr8 | 8 | 39351178  | 39506673  | 155496 | 163 | 0.807809  | 0.012561 | 39350826  | 39351530  | 39505284  | 39508064  |
| 367 NA18517 | [2515685 chr8 | 8 | 49081430  | 49084499  | 3070   | 2   | 0.972302  | 0.119115 | 49079497  | 49083364  | 49084089  | 49084914  |
| 368 NA18517 | [2515685 chr8 | 8 | 58278355  | 58289214  | 10860  | 9   | 0.966403  | 0.047716 | 58277116  | 58279595  | 58288084  | 58290344  |
| 369 NA18517 | [2515685 chr8 | 8 | 58342071  | 58350616  | 8546   | 5   | 0.385046  | 0.064328 | 58341760  | 58342382  | 58350364  | 58350864  |
| 370 NA18517 | [2515685 chr8 | 8 | 85423649  | 85431920  | 8272   | 7   | 1.001389  | 0.059368 | 85423043  | 85424256  | 85431347  | 85432494  |
| 371 NA18517 | [2515685 chr8 | 8 | 86742169  | 86910255  | 168087 | 105 | 0.428908  | 0.013295 | 86741757  | 86742581  | 86910002  | 86910504  |
| 372 NA18517 | [2515685 chr8 | 8 | 123128534 | 123130270 | 1737   | 2   | -0.797824 | 0.127536 | 123127942 | 123129127 | 123130019 | 123130524 |
| 373 NA18517 | [2515685 chr8 | 8 | 142071432 | 142076230 | 4799   | 6   | 0.534692  | 0.062489 | 142070908 | 142071957 | 142073476 | 142110864 |
| 374 NA18517 | [2515685 chr8 | 8 | 144782810 | 144785960 | 3151   | 2   | 0.610991  | 0.102886 | 144771440 | 144785564 | 144785821 | 144786094 |
| 375 NA18517 | [2515685 chr8 | 8 | 145262133 | 145267467 | 5335   | 7   | -0.321419 | 0.051144 | 145260806 | 145263460 | 145267316 | 145267614 |
| 376 NA18517 | [2515685 chr9 | 9 | 1022      | 39976     | 38955  | 62  | -0.261979 | 0.018318 | 1         | 2044      | 38541     | 41412     |
| 377 NA18517 | [2515685 chr9 | 9 | 310045    | 312573    | 2529   | 61  | -1.703537 | 0.020509 | 309952    | 310139    | 312407    | 312740    |
| 378 NA18517 | [2515685 chr9 | 9 | 505204    | 518415    | 13212  | 11  | -0.959324 | 0.052007 | 504417    | 505991    | 516633    | 520194    |
| 379 NA18517 | [2515685 chr9 | 9 | 19116775  | 19118304  | 1530   | 2   | 0.814503  | 0.126864 | 19116471  | 19117079  | 19117918  | 19118694  |
| 380 NA18517 | [2515685 chr9 | 9 | 28836246  | 28838385  | 2140   | 2   | -0.879884 | 0.099228 | 28835879  | 28836613  | 28837661  | 28839114  |
| 381 NA18517 | [2515685 chr9 | 9 | 33688323  | 33689560  | 1238   | 2   | -0.644286 | 0.119008 | 33687588  | 33689059  | 33689374  | 33689744  |
| 382 NA18517 | [2515685 chr9 | 9 | 38856017  | 38864486  | 8470   | 16  | -0.279151 | 0.035597 | 38849975  | 38858379  | 38864433  | 38864534  |
| 383 NA18517 | [2515685 chr9 | 9 | 39818431  | 39822887  | 4457   | 9   | 0.276366  | 0.048839 | 39818000  | 39818862  | 39822472  | 39823304  |
| 384 NA18517 | [2515685 chr9 | 9 | 41234952  | 41243367  | 8416   | 13  | -0.308082 | 0.040399 | 41234900  | 41235005  | 41241005  | 41249464  |
| 385 NA18517 | [2515685 chr9 | 9 | 41642009  | 41646461  | 4453   | 8   | 0.282054  | 0.051188 | 41641595  | 41642423  | 41646031  | 41646894  |
| 386 NA18517 | [2515685 chr9 | 9 | 42075469  | 42078332  | 2864   | 5   | 0.422125  | 0.059054 | 42075304  | 42075634  | 42078087  | 42078574  |
| 387 NA18517 | [2515685 chr9 | 9 | 42639862  | 42643779  | 3918   | 8   | -0.279654 | 0.048367 | 42639537  | 42640187  | 42643538  | 42644027  |
| 388 NA18517 | [2515685 chr9 | 9 | 42760065  | 42762940  | 2876   | 5   | 0.354591  | 0.05727  | 42759900  | 42760230  | 42762696  | 42763184  |
| 389 NA18517 | [2515685 chr9 | 9 | 42880741  | 42883616  | 2876   | 5   | 0.354602  | 0.057271 | 42880576  | 42880906  | 42883372  | 42883864  |
| 390 NA18517 | [2515685 chr9 | 9 | 45204355  | 45400622  | 196268 | 129 | 0.299661  | 0.012797 | 45202442  | 45206269  | 45400280  | 45400964  |
| 391 NA18517 | [2515685 chr9 | 9 | 45429499  | 45493025  | 63527  | 31  | 0.251138  | 0.026588 | 45429117  | 45429882  | 45490663  | 45498264  |
| 392 NA18517 | [2515685 chr9 | 9 | 66047392  | 66055802  | 8411   | 14  | -0.304994 | 0.039928 | 66047340  | 66047445  | 66053440  | 66061904  |
| 393 NA18517 | [2515685 chr9 | 9 | 66527735  | 66688458  | 160724 | 243 | 0.283081  | 0.009448 | 66477921  | 66530097  | 66688100  | 66688814  |
| 394 NA18517 | [2515685 chr9 | 9 | 66730440  | 66739722  | 9283   | 17  | 0.352469  | 0.036834 | 66730246  | 66730634  | 66739448  | 66739994  |
| 395 NA18517 | [2515685 chr9 | 9 | 67195876  | 67196883  | 1008   | 2   | 0.465401  | 0.090552 | 67195691  | 67196062  | 67196717  | 67197044  |
| 396 NA18517 | [2515685 chr9 | 9 | 68200977  | 68201915  | 939    | 2   | 0.680176  | 0.100423 | 68200578  | 68201376  | 68201730  | 68202104  |
| 397 NA18517 | [2515685 chr9 | 9 | 76777070  | 76779384  | 2315   | 2   | 0.689599  | 0.123208 | 76776756  | 76777385  | 76778920  | 76779844  |
| 398 NA18517 | [2515685 chr9 | 9 | 76785489  | 76787598  | 2110   | 2   | -0.873642 | 0.102409 | 76785038  | 76785941  | 76787269  | 76787924  |

|             |                |    |           |           |         |      |           |          |           |           |           |          |
|-------------|----------------|----|-----------|-----------|---------|------|-----------|----------|-----------|-----------|-----------|----------|
| 399 NA18517 | [2515685 chr9  | 9  | 80878260  | 80879919  | 1660    | 2    | 0.550978  | 0.102275 | 80877780  | 80878740  | 80879539  | 8088029! |
| 400 NA18517 | [2515685 chr9  | 9  | 112902065 | 112931264 | 29200   | 41   | 0.414918  | 0.020759 | 112901557 | 112902574 | 112930907 | 11293162 |
| 401 NA18517 | [2515685 chr9  | 9  | 137520450 | 137524423 | 3974    | 6    | -0.363186 | 0.062427 | 137520154 | 137520746 | 137524196 | 13752465 |
| 402 NA18517 | [2515685 chr9  | 9  | 138397462 | 138399638 | 2177    | 11   | -0.348131 | 0.048473 | 138397454 | 138397471 | 138399572 | 13839970 |
| 403 NA18517 | [2515685 chr10 | 10 | 6693908   | 6703893   | 9986    | 8    | 0.841846  | 0.056157 | 6692231   | 6695585   | 6703779   | 670400!  |
| 404 NA18517 | [2515685 chr10 | 10 | 7133746   | 7179673   | 45928   | 45   | 0.532713  | 0.02249  | 7133008   | 7134485   | 7179277   | 718007!  |
| 405 NA18517 | [2515685 chr10 | 10 | 37856225  | 37864429  | 8205    | 7    | -0.814124 | 0.061833 | 37855807  | 37856644  | 37861684  | 3791733! |
| 406 NA18517 | [2515685 chr10 | 10 | 46097898  | 47975665  | 1877768 | 2692 | -0.263663 | 0.002215 | 46097600  | 46098197  | 47975512  | 4797581! |
| 407 NA18517 | [2515685 chr10 | 10 | 48288446  | 48936140  | 647695  | 960  | -0.263663 | 0.002215 | 48287551  | 48289341  | 48935745  | 4893653! |
| 408 NA18517 | [2515685 chr10 | 10 | 49055348  | 49057481  | 2134    | 7    | -0.290477 | 0.053101 | 49055051  | 49055646  | 49057140  | 4905782! |
| 409 NA18517 | [2515685 chr10 | 10 | 51122779  | 51132551  | 9773    | 10   | -0.407554 | 0.043706 | 51122606  | 51122953  | 51132382  | 5113272! |
| 410 NA18517 | [2515685 chr10 | 10 | 56117212  | 56139275  | 22064   | 20   | -0.932453 | 0.034432 | 56115764  | 56118661  | 56138931  | 5613961! |
| 411 NA18517 | [2515685 chr10 | 10 | 62097182  | 62098101  | 920     | 3    | -0.804491 | 0.094445 | 62097051  | 62097313  | 62098782  | 6209833! |
| 412 NA18517 | [2515685 chr10 | 10 | 70175920  | 70179127  | 3208    | 2    | 0.473005  | 0.092478 | 70174479  | 70177361  | 70178825  | 7017943! |
| 413 NA18517 | [2515685 chr10 | 10 | 81130008  | 81131239  | 1232    | 4    | 0.390322  | 0.067002 | 81129619  | 81130398  | 81131087  | 8113139! |
| 414 NA18517 | [2515685 chr10 | 10 | 81450207  | 81451438  | 1232    | 4    | 0.390331  | 0.067003 | 81449818  | 81450597  | 81451286  | 8145159! |
| 415 NA18517 | [2515685 chr10 | 10 | 81460101  | 81486874  | 26774   | 25   | -0.258525 | 0.026895 | 81460023  | 81460179  | 81484542  | 8148920! |
| 416 NA18517 | [2515685 chr10 | 10 | 81622571  | 81625981  | 3411    | 7    | -0.271728 | 0.052356 | 81621713  | 81623429  | 81625622  | 8162634  |
| 417 NA18517 | [2515685 chr10 | 10 | 88864785  | 88966295  | 101511  | 112  | -0.356767 | 0.013435 | 88863954  | 88865617  | 88965910  | 8896668! |
| 418 NA18517 | [2515685 chr10 | 10 | 88972215  | 88973430  | 1216    | 4    | 0.400594  | 0.067002 | 88971824  | 88972607  | 88973280  | 8897358  |
| 419 NA18517 | [2515685 chr10 | 10 | 89132355  | 89179870  | 47516   | 82   | -0.254952 | 0.016117 | 89132347  | 89132364  | 89179587  | 8918015! |
| 420 NA18517 | [2515685 chr10 | 10 | 124336365 | 124341749 | 5385    | 6    | 0.558799  | 0.066604 | 124335581 | 124337149 | 124341238 | 12434226 |
| 421 NA18517 | [2515685 chr10 | 10 | 124350353 | 124366738 | 16386   | 21   | -0.752708 | 0.028868 | 124350031 | 124350675 | 124366300 | 12436717 |
| 422 NA18517 | [2515685 chr10 | 10 | 134168766 | 134170259 | 1494    | 17   | -1.331051 | 0.044818 | 134168524 | 134169008 | 134170097 | 13417042 |
| 423 NA18517 | [2515685 chr10 | 10 | 134813662 | 134816896 | 3235    | 4    | -0.460443 | 0.06971  | 134813181 | 134814143 | 134816698 | 13481709 |
| 424 NA18517 | [2515685 chr11 | 11 | 969654    | 971069    | 1416    | 2    | 1.117291  | 0.115962 | 969333    | 969976    | 970737    | 971401   |
| 425 NA18517 | [2515685 chr11 | 11 | 1048733   | 1050368   | 1636    | 2    | -0.781199 | 0.117636 | 1048209   | 1049258   | 1050008   | 105072!  |
| 426 NA18517 | [2515685 chr11 | 11 | 2840307   | 2842410   | 2104    | 3    | 1.066136  | 0.098241 | 2839959   | 2840656   | 2841856   | 284296!  |
| 427 NA18517 | [2515685 chr11 | 11 | 2999681   | 3137580   | 137900  | 2    | -0.586782 | 0.0929   | 2949255   | 3002762   | 3134499   | 317326!  |
| 428 NA18517 | [2515685 chr11 | 11 | 3271902   | 3274139   | 2238    | 3    | -0.719701 | 0.086094 | 3271303   | 3272502   | 3273580   | 327469!  |
| 429 NA18517 | [2515685 chr11 | 11 | 3559609   | 3562263   | 2655    | 5    | -0.399023 | 0.063458 | 3559279   | 3559939   | 3561979   | 356254!  |
| 430 NA18517 | [2515685 chr11 | 11 | 3628748   | 3632795   | 4048    | 6    | -1.163835 | 0.066111 | 3625722   | 3631775   | 3632594   | 363299!  |
| 431 NA18517 | [2515685 chr11 | 11 | 4203852   | 4334469   | 130618  | 167  | 0.370213  | 0.011304 | 4203641   | 4204063   | 4334236   | 433470!  |
| 432 NA18517 | [2515685 chr11 | 11 | 4924115   | 4932599   | 8485    | 9    | -0.882286 | 0.050864 | 4923827   | 4924403   | 4931948   | 493325!  |
| 433 NA18517 | [2515685 chr11 | 11 | 5717038   | 5722026   | 4989    | 3    | 3.364597  | 0.145554 | 5716660   | 5717416   | 5718945   | 572548!  |
| 434 NA18517 | [2515685 chr11 | 11 | 5741269   | 5765993   | 24725   | 32   | 2.438953  | 0.042398 | 5741059   | 5741480   | 5765632   | 576635!  |
| 435 NA18517 | [2515685 chr11 | 11 | 11831868  | 11833089  | 1222    | 2    | 0.930436  | 0.113897 | 11831412  | 11832324  | 11832853  | 1183332! |
| 436 NA18517 | [2515685 chr11 | 11 | 18906905  | 18928671  | 21767   | 30   | 0.486147  | 0.027537 | 18906533  | 18907278  | 18928457  | 1892888! |
| 437 NA18517 | [2515685 chr11 | 11 | 21803767  | 21805833  | 2067    | 3    | -0.83106  | 0.084798 | 21803616  | 21803918  | 21805682  | 218059!  |
| 438 NA18517 | [2515685 chr11 | 11 | 28965605  | 28969186  | 3582    | 5    | 3.33727   | 0.148877 | 28965284  | 28965927  | 28968702  | 2896967! |
| 439 NA18517 | [2515685 chr11 | 11 | 36927446  | 37069002  | 141557  | 6    | 0.315872  | 0.062252 | 36835873  | 36930527  | 37068060  | 370699!  |
| 440 NA18517 | [2515685 chr11 | 11 | 48284073  | 48284771  | 699     | 2    | 0.972491  | 0.106112 | 48283862  | 48284285  | 48284572  | 4828497! |
| 441 NA18517 | [2515685 chr11 | 11 | 48997072  | 49001951  | 4880    | 10   | 0.431143  | 0.046585 | 48996760  | 48997384  | 49001459  | 490024!  |
| 442 NA18517 | [2515685 chr11 | 11 | 49072856  | 49075952  | 3097    | 6    | 0.380111  | 0.060834 | 49072572  | 49073140  | 49075650  | 490762!  |
| 443 NA18517 | [2515685 chr11 | 11 | 49665830  | 49715829  | 50000   | 36   | 0.501524  | 0.024908 | 49665251  | 49666410  | 49712748  | 497219!  |
| 444 NA18517 | [2515685 chr11 | 11 | 55348334  | 55350588  | 2255    | 3    | -0.418631 | 0.08339  | 55348047  | 55348621  | 55350206  | 5535097! |
| 445 NA18517 | [2515685 chr11 | 11 | 73812690  | 73817979  | 5290    | 3    | -0.533202 | 0.088385 | 73812400  | 73812981  | 73817746  | 738182!  |
| 446 NA18517 | [2515685 chr11 | 11 | 77325699  | 77348590  | 22892   | 4    | -0.338347 | 0.06403  | 77318692  | 77328780  | 77345509  | 773702!  |
| 447 NA18517 | [2515685 chr11 | 11 | 81149111  | 81152122  | 3012    | 4    | 0.463772  | 0.080617 | 81148927  | 81149295  | 81151934  | 811523!  |
| 448 NA18517 | [2515685 chr11 | 11 | 81167365  | 81169409  | 2045    | 3    | -0.574117 | 0.082595 | 81166938  | 81167792  | 81168628  | 811701!  |
| 449 NA18517 | [2515685 chr11 | 11 | 88266938  | 88285191  | 18254   | 26   | 0.268716  | 0.023542 | 88266424  | 88267453  | 88284987  | 882853!  |
| 450 NA18517 | [2515685 chr11 | 11 | 88295926  | 88303948  | 8023    | 9    | 0.268716  | 0.023542 | 88293741  | 88298112  | 88303762  | 883041!  |
| 451 NA18517 | [2515685 chr11 | 11 | 89184898  | 89188706  | 3809    | 4    | 0.800414  | 0.081365 | 89184243  | 89185554  | 89188235  | 891891!  |
| 452 NA18517 | [2515685 chr11 | 11 | 89323378  | 89327673  | 4296    | 10   | 0.273984  | 0.047597 | 89323091  | 89323665  | 89327396  | 893279!  |
| 453 NA18517 | [2515685 chr11 | 11 | 104230730 | 104231763 | 1034    | 2    | 0.748073  | 0.115852 | 104230355 | 104231105 | 104231474 | 1042320! |

|             |                |    |           |           |        |     |           |          |           |           |           |           |
|-------------|----------------|----|-----------|-----------|--------|-----|-----------|----------|-----------|-----------|-----------|-----------|
| 454 NA18517 | [2515685 chr11 | 11 | 106744846 | 106751052 | 6207   | 9   | -2.986515 | 0.096365 | 106744561 | 106745131 | 106747971 | 106754831 |
| 455 NA18517 | [2515685 chr11 | 11 | 134107699 | 134112290 | 4592   | 5   | 0.752771  | 0.069084 | 134106591 | 134108808 | 134111845 | 134112731 |
| 456 NA18517 | [2515685 chr12 | 12 | 300666    | 302505    | 1840   | 2   | -0.898912 | 0.109274 | 300400    | 300933    | 301926    | 303084    |
| 457 NA18517 | [2515685 chr12 | 12 | 736840    | 744802    | 7963   | 9   | 0.89002   | 0.050372 | 736616    | 737064    | 744211    | 745394    |
| 458 NA18517 | [2515685 chr12 | 12 | 2112534   | 2127044   | 14511  | 15  | 0.707188  | 0.039555 | 2109107   | 2115961   | 2126809   | 2127279   |
| 459 NA18517 | [2515685 chr12 | 12 | 3261044   | 3262864   | 1821   | 2   | -0.65796  | 0.106127 | 3260491   | 3261597   | 3262232   | 3263497   |
| 460 NA18517 | [2515685 chr12 | 12 | 6113530   | 6117052   | 3523   | 3   | 0.526631  | 0.092772 | 6111640   | 6115421   | 6116289   | 6117816   |
| 461 NA18517 | [2515685 chr12 | 12 | 7846762   | 7847901   | 1140   | 2   | 0.627382  | 0.104674 | 7846594   | 7846930   | 7847677   | 7848121   |
| 462 NA18517 | [2515685 chr12 | 12 | 8254404   | 8262986   | 8583   | 10  | -0.394528 | 0.045867 | 8254117   | 8254692   | 8262374   | 8263598   |
| 463 NA18517 | [2515685 chr12 | 12 | 8455796   | 8458368   | 2573   | 2   | 0.833303  | 0.103352 | 8454283   | 8457309   | 8457860   | 8458877   |
| 464 NA18517 | [2515685 chr12 | 12 | 9439936   | 9445623   | 5688   | 9   | 0.341171  | 0.045933 | 9439574   | 9440298   | 9445247   | 9446000   |
| 465 NA18517 | [2515685 chr12 | 12 | 9524239   | 9526454   | 2216   | 2   | 0.568973  | 0.105911 | 9523968   | 9524510   | 9526036   | 9526872   |
| 466 NA18517 | [2515685 chr12 | 12 | 9527659   | 9610804   | 83146  | 91  | 0.772602  | 0.017507 | 9526872   | 9528447   | 9610082   | 9611526   |
| 467 NA18517 | [2515685 chr12 | 12 | 9787653   | 9788752   | 1100   | 2   | -0.540257 | 0.100062 | 9787167   | 9788140   | 9788546   | 9788958   |
| 468 NA18517 | [2515685 chr12 | 12 | 10468220  | 10487392  | 19173  | 16  | -0.480123 | 0.038859 | 10466973  | 10469467  | 10486385  | 10488401  |
| 469 NA18517 | [2515685 chr12 | 12 | 11038220  | 11039650  | 1431   | 3   | 0.436225  | 0.081827 | 11037861  | 11038580  | 11039445  | 11039851  |
| 470 NA18517 | [2515685 chr12 | 12 | 11070849  | 11096185  | 25337  | 28  | -0.275123 | 0.027998 | 11069857  | 11071841  | 11095976  | 11096397  |
| 471 NA18517 | [2515685 chr12 | 12 | 11109398  | 11142012  | 32615  | 40  | -0.546341 | 0.024051 | 11109206  | 11109590  | 11141608  | 11142417  |
| 472 NA18517 | [2515685 chr12 | 12 | 11398049  | 11436142  | 38094  | 34  | -0.880587 | 0.027022 | 11397507  | 11398591  | 11435669  | 11436611  |
| 473 NA18517 | [2515685 chr12 | 12 | 11436142  | 11463223  | 27082  | 32  | -0.340715 | 0.026804 | 11435669  | 11436615  | 11459990  | 11466457  |
| 474 NA18517 | [2515685 chr12 | 12 | 12605956  | 12607299  | 1344   | 2   | 0.719404  | 0.133116 | 12605559  | 12606353  | 12606864  | 12607737  |
| 475 NA18517 | [2515685 chr12 | 12 | 27539466  | 27545857  | 6392   | 9   | -0.843359 | 0.054519 | 27539237  | 27539695  | 27545179  | 27546531  |
| 476 NA18517 | [2515685 chr12 | 12 | 31157786  | 31161854  | 4069   | 4   | 0.458092  | 0.07418  | 31157274  | 31158299  | 31161033  | 31162671  |
| 477 NA18517 | [2515685 chr12 | 12 | 31166636  | 31244780  | 78145  | 73  | 0.400376  | 0.017801 | 31164617  | 31168656  | 31244217  | 31245347  |
| 478 NA18517 | [2515685 chr12 | 12 | 34099499  | 34108168  | 8670   | 13  | -0.62356  | 0.043645 | 34099360  | 34099639  | 34107972  | 34108367  |
| 479 NA18517 | [2515685 chr12 | 12 | 36209451  | 36218223  | 8773   | 11  | -0.287417 | 0.042851 | 36200442  | 36212944  | 36216143  | 36220307  |
| 480 NA18517 | [2515685 chr12 | 12 | 52786262  | 52797865  | 11604  | 14  | -0.27168  | 0.038411 | 52785827  | 52786698  | 52797300  | 52798437  |
| 481 NA18517 | [2515685 chr12 | 12 | 69156919  | 69167889  | 10971  | 11  | 0.803842  | 0.047585 | 69138649  | 69160412  | 69164396  | 69215017  |
| 482 NA18517 | [2515685 chr12 | 12 | 71359792  | 71360949  | 1158   | 2   | -0.743591 | 0.114896 | 71359585  | 71360000  | 71360706  | 71361119  |
| 483 NA18517 | [2515685 chr12 | 12 | 78656134  | 78665261  | 9128   | 9   | -0.457272 | 0.052062 | 78654687  | 78657582  | 78664736  | 78665787  |
| 484 NA18517 | [2515685 chr12 | 12 | 87338120  | 87347005  | 8886   | 4   | -0.476583 | 0.08026  | 87329173  | 87341613  | 87346311  | 87347701  |
| 485 NA18517 | [2515685 chr12 | 12 | 132249060 | 132249924 | 865    | 2   | 1.184458  | 0.124845 | 132248918 | 132249203 | 132249666 | 132250187 |
| 486 NA18517 | [2515685 chr13 | 13 | 25947233  | 25950398  | 3166   | 3   | 3.622541  | 0.164695 | 25946194  | 25948272  | 25949415  | 25951387  |
| 487 NA18517 | [2515685 chr13 | 13 | 33036334  | 33042392  | 6059   | 6   | 0.921702  | 0.069233 | 33034735  | 33037934  | 33041860  | 33042921  |
| 488 NA18517 | [2515685 chr13 | 13 | 41659638  | 41661666  | 2029   | 2   | 0.702539  | 0.113423 | 41659324  | 41659953  | 41660955  | 41662377  |
| 489 NA18517 | [2515685 chr13 | 13 | 56611711  | 56645734  | 34024  | 47  | 0.733515  | 0.018678 | 56610946  | 56612477  | 56645321  | 56646147  |
| 490 NA18517 | [2515685 chr13 | 13 | 56653890  | 56686136  | 32247  | 30  | -3.237802 | 0.052119 | 56650401  | 56657380  | 56685381  | 56686897  |
| 491 NA18517 | [2515685 chr13 | 13 | 69633905  | 69673289  | 39385  | 42  | 0.872492  | 0.024332 | 69633412  | 69634399  | 69672985  | 69673597  |
| 492 NA18517 | [2515685 chr13 | 13 | 104579799 | 104581514 | 1716   | 3   | 0.471022  | 0.085266 | 104579321 | 104580277 | 104581285 | 104581747 |
| 493 NA18517 | [2515685 chr13 | 13 | 110502383 | 110503129 | 747    | 3   | 0.992605  | 0.100066 | 110502225 | 110502541 | 110502890 | 110503367 |
| 494 NA18517 | [2515685 chr13 | 13 | 113079647 | 113086820 | 7174   | 3   | 0.732195  | 0.088885 | 113078890 | 113080404 | 113082138 | 113094347 |
| 495 NA18517 | [2515685 chr14 | 14 | 18527136  | 18541076  | 13941  | 6   | -0.82903  | 0.062126 | 18526373  | 18527899  | 18540534  | 18541611  |
| 496 NA18517 | [2515685 chr14 | 14 | 18692915  | 18696855  | 3941   | 6   | -0.45967  | 0.058316 | 18691410  | 18694421  | 18696737  | 18696977  |
| 497 NA18517 | [2515685 chr14 | 14 | 18850498  | 18869365  | 18868  | 17  | -0.495024 | 0.036579 | 18850172  | 18850824  | 18866159  | 18872577  |
| 498 NA18517 | [2515685 chr14 | 14 | 19265232  | 19321488  | 56257  | 53  | -0.335177 | 0.020373 | 19261661  | 19268804  | 19321109  | 19321867  |
| 499 NA18517 | [2515685 chr14 | 14 | 19322616  | 19476789  | 154174 | 139 | -0.505036 | 0.012924 | 19321867  | 19323366  | 19476589  | 19476991  |
| 500 NA18517 | [2515685 chr14 | 14 | 19488657  | 19494842  | 6186   | 8   | -0.466603 | 0.05081  | 19488434  | 19488881  | 19494444  | 19495247  |
| 501 NA18517 | [2515685 chr14 | 14 | 19619358  | 19625484  | 6127   | 3   | 2.635918  | 0.158246 | 19612261  | 19624114  | 19625018  | 19625951  |
| 502 NA18517 | [2515685 chr14 | 14 | 32022775  | 32026140  | 3366   | 2   | -0.922926 | 0.123408 | 32022274  | 32023276  | 32023749  | 32028537  |
| 503 NA18517 | [2515685 chr14 | 14 | 34183356  | 34192233  | 8878   | 12  | -0.736231 | 0.044205 | 34181692  | 34185020  | 34189097  | 34195371  |
| 504 NA18517 | [2515685 chr14 | 14 | 42059344  | 42062997  | 3654   | 2   | 0.68369   | 0.113163 | 42056485  | 42062203  | 42062601  | 42063397  |
| 505 NA18517 | [2515685 chr14 | 14 | 73063171  | 73119729  | 56559  | 51  | 0.705234  | 0.021739 | 73061866  | 73064476  | 73118276  | 73121118  |
| 506 NA18517 | [2515685 chr14 | 14 | 77194461  | 77196644  | 2184   | 2   | 0.749929  | 0.01903  | 77194213  | 77194710  | 77196380  | 77196907  |
| 507 NA18517 | [2515685 chr15 | 15 | 18536491  | 18565376  | 28886  | 31  | -0.296738 | 0.024244 | 18535776  | 18537207  | 18563074  | 18572407  |
| 508 NA18517 | [2515685 chr15 | 15 | 18982174  | 18983062  | 889    | 5   | -0.408347 | 0.061148 | 18981996  | 18982352  | 18982968  | 18983157  |

|             |                |    |           |           |        |     |           |          |           |           |           |           |
|-------------|----------------|----|-----------|-----------|--------|-----|-----------|----------|-----------|-----------|-----------|-----------|
| 509 NA18517 | [2515685 chr15 | 15 | 19044664  | 19092673  | 48010  | 56  | -0.304255 | 0.018466 | 19044489  | 19044840  | 19092490  | 19092851  |
| 510 NA18517 | [2515685 chr15 | 15 | 19548332  | 19576980  | 28649  | 28  | -0.288182 | 0.025171 | 19547623  | 19549041  | 19574678  | 19583644  |
| 511 NA18517 | [2515685 chr15 | 15 | 19874194  | 19884979  | 10786  | 15  | -1.136719 | 0.044237 | 19873671  | 19874718  | 19884772  | 19885181  |
| 512 NA18517 | [2515685 chr15 | 15 | 20371610  | 20385080  | 13471  | 18  | -0.524669 | 0.033391 | 20367922  | 20373912  | 20384584  | 20385577  |
| 513 NA18517 | [2515685 chr15 | 15 | 20940396  | 20940987  | 592    | 4   | -0.428481 | 0.066904 | 20940218  | 20940574  | 20940968  | 20941001  |
| 514 NA18517 | [2515685 chr15 | 15 | 21003489  | 21051502  | 48014  | 50  | -0.305121 | 0.019493 | 21003314  | 21003665  | 21051321  | 21051684  |
| 515 NA18517 | [2515685 chr15 | 15 | 21227559  | 21230206  | 2648   | 12  | -0.301572 | 0.039634 | 21227472  | 21227646  | 21230089  | 21230321  |
| 516 NA18517 | [2515685 chr15 | 15 | 21606753  | 21614600  | 7848   | 7   | 0.925185  | 0.063886 | 21606459  | 21607047  | 21612298  | 21636691  |
| 517 NA18517 | [2515685 chr15 | 15 | 22056876  | 22068810  | 11935  | 9   | -0.291976 | 0.047301 | 22056649  | 22057103  | 22066508  | 22071221  |
| 518 NA18517 | [2515685 chr15 | 15 | 22217690  | 22288061  | 70372  | 87  | -0.318885 | 0.015864 | 22217361  | 22218020  | 22287878  | 22288244  |
| 519 NA18517 | [2515685 chr15 | 15 | 22658272  | 22662229  | 3958   | 3   | -0.954615 | 0.094232 | 22658051  | 22658494  | 22659927  | 22669491  |
| 520 NA18517 | [2515685 chr15 | 15 | 24986053  | 24992250  | 6198   | 7   | 0.857737  | 0.061652 | 24985426  | 24986680  | 24991680  | 24992821  |
| 521 NA18517 | [2515685 chr15 | 15 | 26875842  | 26877026  | 1185   | 2   | 1.034572  | 0.121818 | 26875299  | 26876385  | 26876824  | 26877221  |
| 522 NA18517 | [2515685 chr15 | 15 | 28177626  | 28184037  | 6412   | 11  | -0.25375  | 0.042245 | 28177335  | 28177917  | 28183447  | 28184621  |
| 523 NA18517 | [2515685 chr15 | 15 | 30513546  | 30519966  | 6421   | 9   | -0.280972 | 0.046218 | 30512958  | 30514135  | 30519675  | 30520251  |
| 524 NA18517 | [2515685 chr15 | 15 | 32515477  | 32592621  | 77145  | 65  | 0.629637  | 0.019508 | 32514954  | 32516000  | 32592260  | 32592981  |
| 525 NA18517 | [2515685 chr15 | 15 | 32594011  | 32598425  | 4415   | 3   | 0.483103  | 0.088363 | 32593777  | 32594245  | 32597169  | 32599681  |
| 526 NA18517 | [2515685 chr15 | 15 | 43106834  | 43111174  | 4341   | 5   | 0.508337  | 0.063997 | 43106498  | 43107171  | 43111071  | 43111271  |
| 527 NA18517 | [2515685 chr15 | 15 | 74671388  | 74682820  | 11433  | 9   | 0.967534  | 0.054805 | 74671122  | 74671654  | 74680518  | 74689511  |
| 528 NA18517 | [2515685 chr15 | 15 | 75117585  | 75119946  | 2362   | 4   | 0.915215  | 0.076098 | 75117343  | 75117827  | 75119741  | 75120151  |
| 529 NA18517 | [2515685 chr15 | 15 | 82858165  | 82880155  | 21991  | 5   | -0.307352 | 0.061403 | 82851155  | 82860467  | 82877853  | 82891011  |
| 530 NA18517 | [2515685 chr15 | 15 | 83685983  | 83688723  | 2741   | 2   | -0.601934 | 0.106751 | 83684729  | 83687238  | 83687705  | 83689741  |
| 531 NA18517 | [2515685 chr15 | 15 | 98234084  | 98240716  | 6633   | 8   | 0.845821  | 0.05695  | 98233842  | 98234327  | 98239350  | 98242081  |
| 532 NA18517 | [2515685 chr15 | 15 | 98570178  | 98571936  | 1759   | 2   | 0.588482  | 0.113318 | 98569684  | 98570672  | 98571158  | 98572711  |
| 533 NA18517 | [2515685 chr15 | 15 | 99453510  | 99455547  | 2038   | 3   | 0.969393  | 0.098322 | 99453160  | 99453860  | 99454156  | 99456931  |
| 534 NA18517 | [2515685 chr15 | 15 | 100109640 | 100122682 | 13043  | 98  | 0.884392  | 0.013127 | 100108905 | 100110376 | 100122315 | 100123051 |
| 535 NA18517 | [2515685 chr15 | 15 | 100274628 | 100337837 | 63210  | 62  | -0.257411 | 0.018304 | 100269190 | 100276930 | 100336759 | 10033891  |
| 536 NA18517 | [2515685 chr16 | 16 | 924       | 22315     | 21392  | 23  | -0.280792 | 0.030332 | 1         | 1848      | 21856     | 22774     |
| 537 NA18517 | [2515685 chr16 | 16 | 669910    | 671309    | 1400   | 2   | 0.754766  | 0.119158 | 669664    | 670156    | 670956    | 671663    |
| 538 NA18517 | [2515685 chr16 | 16 | 2120889   | 2126876   | 5988   | 6   | -0.352503 | 0.05793  | 2118476   | 2122769   | 2125012   | 2128747   |
| 539 NA18517 | [2515685 chr16 | 16 | 5287117   | 5290631   | 3515   | 2   | 1.269345  | 0.132128 | 5286149   | 5288085   | 5288751   | 5293271   |
| 540 NA18517 | [2515685 chr16 | 16 | 10107199  | 10108716  | 1518   | 2   | 0.620315  | 0.099147 | 10106939  | 10107460  | 10108461  | 10108971  |
| 541 NA18517 | [2515685 chr16 | 16 | 12550392  | 12556181  | 5790   | 6   | -0.397044 | 0.061613 | 12549915  | 12550869  | 12555671  | 12556691  |
| 542 NA18517 | [2515685 chr16 | 16 | 12563891  | 12581450  | 17560  | 10  | -0.280911 | 0.046556 | 12563523  | 12564260  | 12580760  | 12582141  |
| 543 NA18517 | [2515685 chr16 | 16 | 12597420  | 12615138  | 17719  | 15  | -0.729297 | 0.041415 | 12588878  | 12599300  | 12614734  | 12615541  |
| 544 NA18517 | [2515685 chr16 | 16 | 14696077  | 14703775  | 7699   | 5   | 0.653246  | 0.05727  | 14695838  | 14696316  | 14703313  | 14704231  |
| 545 NA18517 | [2515685 chr16 | 16 | 14704542  | 14707381  | 2840   | 2   | 0.584352  | 0.090552 | 14704237  | 14704848  | 14706351  | 14708411  |
| 546 NA18517 | [2515685 chr16 | 16 | 14735195  | 14742897  | 7703   | 5   | 0.653246  | 0.05727  | 14734956  | 14735434  | 14742435  | 14743351  |
| 547 NA18517 | [2515685 chr16 | 16 | 14743664  | 14746503  | 2840   | 2   | 0.584352  | 0.090552 | 14743359  | 14743970  | 14745473  | 14747531  |
| 548 NA18517 | [2515685 chr16 | 16 | 14955818  | 15032337  | 76520  | 70  | -0.253088 | 0.017596 | 14955356  | 14956281  | 15031429  | 15033241  |
| 549 NA18517 | [2515685 chr16 | 16 | 16633469  | 16639120  | 5652   | 4   | 0.923427  | 0.077538 | 16632502  | 16634437  | 16638386  | 16639851  |
| 550 NA18517 | [2515685 chr16 | 16 | 17697480  | 17701251  | 3772   | 4   | 0.393753  | 0.074438 | 17697179  | 17697782  | 17700912  | 17701591  |
| 551 NA18517 | [2515685 chr16 | 16 | 18151022  | 18152702  | 1681   | 2   | -0.66625  | 0.113539 | 18150515  | 18151530  | 18152244  | 18153161  |
| 552 NA18517 | [2515685 chr16 | 16 | 20403581  | 20404927  | 1347   | 2   | -0.983228 | 0.11019  | 20403144  | 20404018  | 20404663  | 20405191  |
| 553 NA18517 | [2515685 chr16 | 16 | 20407242  | 20409638  | 2397   | 3   | -0.568834 | 0.091278 | 20406711  | 20407774  | 20409451  | 20409821  |
| 554 NA18517 | [2515685 chr16 | 16 | 21369812  | 21371755  | 1944   | 7   | 0.432623  | 0.053619 | 21369629  | 21369995  | 21371746  | 21371761  |
| 555 NA18517 | [2515685 chr16 | 16 | 21470801  | 21717548  | 246748 | 232 | 0.456116  | 0.009546 | 21470452  | 21471150  | 21717221  | 21717871  |
| 556 NA18517 | [2515685 chr16 | 16 | 22363949  | 22455430  | 91482  | 228 | 0.25536   | 0.007122 | 22363506  | 22364393  | 22455152  | 22455701  |
| 557 NA18517 | [2515685 chr16 | 16 | 22460448  | 22618743  | 158296 | 144 | 0.25536   | 0.007122 | 22460429  | 22460468  | 22617181  | 22620301  |
| 558 NA18517 | [2515685 chr16 | 16 | 28322704  | 28335549  | 12846  | 14  | -0.333783 | 0.040082 | 28322585  | 28322823  | 28334190  | 28336901  |
| 559 NA18517 | [2515685 chr16 | 16 | 28617225  | 28630243  | 13019  | 15  | -0.368615 | 0.038981 | 28615757  | 28618694  | 28630124  | 28630361  |
| 560 NA18517 | [2515685 chr16 | 16 | 30108684  | 30112285  | 3602   | 6   | 0.335416  | 0.055629 | 30108019  | 30109350  | 30111935  | 30112631  |
| 561 NA18517 | [2515685 chr16 | 16 | 31900721  | 31901605  | 885    | 2   | 0.945211  | 0.113348 | 31900500  | 31900942  | 31901267  | 31901941  |
| 562 NA18517 | [2515685 chr16 | 16 | 31967942  | 31970678  | 2737   | 3   | 0.441001  | 0.075586 | 31967627  | 31968258  | 31970290  | 31971061  |
| 563 NA18517 | [2515685 chr16 | 16 | 32106365  | 32106660  | 296    | 2   | 1.081144  | 0.119318 | 32106136  | 32106595  | 32106634  | 32106681  |

|             |                |    |          |          |        |     |           |          |          |          |          |          |
|-------------|----------------|----|----------|----------|--------|-----|-----------|----------|----------|----------|----------|----------|
| 564 NA18517 | [2515685 chr16 | 16 | 32159898 | 32160377 | 480    | 2   | -0.995156 | 0.102528 | 32159453 | 32160343 | 32160346 | 32160401 |
| 565 NA18517 | [2515685 chr16 | 16 | 32184891 | 32197889 | 12999  | 10  | 0.293365  | 0.043125 | 32183813 | 32185969 | 32197414 | 32198361 |
| 566 NA18517 | [2515685 chr16 | 16 | 32210096 | 32219640 | 9545   | 19  | 0.329908  | 0.030629 | 32209551 | 32210641 | 32219531 | 32219741 |
| 567 NA18517 | [2515685 chr16 | 16 | 32606692 | 32607163 | 472    | 2   | -0.995201 | 0.10253  | 32606661 | 32606724 | 32606727 | 32607591 |
| 568 NA18517 | [2515685 chr16 | 16 | 32660409 | 32660703 | 295    | 2   | 1.081158  | 0.119319 | 32660384 | 32660435 | 32660474 | 32660931 |
| 569 NA18517 | [2515685 chr16 | 16 | 32911174 | 32913901 | 2728   | 5   | 0.443635  | 0.063015 | 32910852 | 32911497 | 32913513 | 32914281 |
| 570 NA18517 | [2515685 chr16 | 16 | 33047346 | 33047640 | 295    | 2   | 1.081158  | 0.119319 | 33047117 | 33047575 | 33047614 | 33047661 |
| 571 NA18517 | [2515685 chr16 | 16 | 33100875 | 33101346 | 472    | 2   | -0.995201 | 0.10253  | 33100438 | 33101312 | 33101315 | 33101371 |
| 572 NA18517 | [2515685 chr16 | 16 | 33124839 | 33137729 | 12891  | 10  | 0.280479  | 0.042169 | 33124761 | 33124917 | 33137560 | 33137891 |
| 573 NA18517 | [2515685 chr16 | 16 | 33157406 | 33157879 | 474    | 2   | -0.995161 | 0.102529 | 33156967 | 33157845 | 33157848 | 33157911 |
| 574 NA18517 | [2515685 chr16 | 16 | 33181378 | 33194268 | 12891  | 10  | 0.280479  | 0.042169 | 33181300 | 33181456 | 33194099 | 33194431 |
| 575 NA18517 | [2515685 chr16 | 16 | 33207215 | 33217055 | 9841   | 18  | 0.342155  | 0.032154 | 33206951 | 33207480 | 33216946 | 33217161 |
| 576 NA18517 | [2515685 chr16 | 16 | 33287437 | 33290100 | 2664   | 3   | 0.451574  | 0.086205 | 33287171 | 33287704 | 33289636 | 33290561 |
| 577 NA18517 | [2515685 chr16 | 16 | 33392689 | 33397333 | 4645   | 8   | 0.338013  | 0.050922 | 33392062 | 33393316 | 33397172 | 33397491 |
| 578 NA18517 | [2515685 chr16 | 16 | 33432825 | 33450976 | 18152  | 32  | 0.330561  | 0.025589 | 33432564 | 33433086 | 33449096 | 33455811 |
| 579 NA18517 | [2515685 chr16 | 16 | 33453934 | 33459181 | 5248   | 2   | -0.707701 | 0.113299 | 33449096 | 33455814 | 33457301 | 33463151 |
| 580 NA18517 | [2515685 chr16 | 16 | 33569292 | 33571691 | 2400   | 4   | 0.438683  | 0.073128 | 33568900 | 33569684 | 33571368 | 33572011 |
| 581 NA18517 | [2515685 chr16 | 16 | 34315495 | 34606125 | 290631 | 324 | -0.489153 | 0.008331 | 34314428 | 34316562 | 34605058 | 34607191 |
| 582 NA18517 | [2515685 chr16 | 16 | 54353711 | 54380125 | 26415  | 28  | -0.518927 | 0.028408 | 54353419 | 54354004 | 54379862 | 54380381 |
| 583 NA18517 | [2515685 chr16 | 16 | 54401577 | 54403491 | 1915   | 2   | 0.653849  | 0.112091 | 54401078 | 54402076 | 54402534 | 54404441 |
| 584 NA18517 | [2515685 chr16 | 16 | 57204541 | 57207585 | 3045   | 3   | 4.899554  | 0.203628 | 57204170 | 57204913 | 57206938 | 57208231 |
| 585 NA18517 | [2515685 chr16 | 16 | 70647868 | 70650857 | 2990   | 4   | 0.418891  | 0.077787 | 70647656 | 70648081 | 70650462 | 70651251 |
| 586 NA18517 | [2515685 chr16 | 16 | 70653409 | 70668660 | 15252  | 7   | 0.933349  | 0.060383 | 70653186 | 70653632 | 70668127 | 70669191 |
| 587 NA18517 | [2515685 chr16 | 16 | 76930776 | 76942282 | 11507  | 9   | 0.636065  | 0.049489 | 76930290 | 76931263 | 76941602 | 76942961 |
| 588 NA18517 | [2515685 chr16 | 16 | 84561410 | 84565235 | 3826   | 12  | -0.364909 | 0.044542 | 84561136 | 84561685 | 84565142 | 84565321 |
| 589 NA18517 | [2515685 chr16 | 16 | 85087756 | 85089036 | 1281   | 2   | 0.826081  | 0.111404 | 85087427 | 85088085 | 85088690 | 85089381 |
| 590 NA18517 | [2515685 chr16 | 16 | 86472841 | 86481860 | 9020   | 8   | 0.277321  | 0.052686 | 86472244 | 86473439 | 86481478 | 86482241 |
| 591 NA18517 | [2515685 chr16 | 16 | 88181036 | 88182713 | 1678   | 2   | 0.721245  | 0.107477 | 88180612 | 88181461 | 88182173 | 88183251 |
| 592 NA18517 | [2515685 chr16 | 16 | 88710464 | 88712266 | 1803   | 9   | -0.378575 | 0.05463  | 88710456 | 88710473 | 88712200 | 88712331 |
| 593 NA18517 | [2515685 chr17 | 17 | 656310   | 657586   | 1277   | 2   | -0.529435 | 0.100409 | 655962   | 656659   | 657277   | 657896   |
| 594 NA18517 | [2515685 chr17 | 17 | 16657271 | 16665630 | 8360   | 13  | -0.584786 | 0.043483 | 16657056 | 16657486 | 16665353 | 16665901 |
| 595 NA18517 | [2515685 chr17 | 17 | 18297586 | 18312755 | 15170  | 23  | 0.580322  | 0.031492 | 18297407 | 18297765 | 18311481 | 18314031 |
| 596 NA18517 | [2515685 chr17 | 17 | 18314297 | 18326922 | 12626  | 16  | 0.259757  | 0.036536 | 18314030 | 18314564 | 18326524 | 18327321 |
| 597 NA18517 | [2515685 chr17 | 17 | 18331739 | 18332345 | 607    | 2   | -0.674845 | 0.09935  | 18331509 | 18331970 | 18331978 | 18332711 |
| 598 NA18517 | [2515685 chr17 | 17 | 19026058 | 19040012 | 13955  | 18  | 0.272509  | 0.032392 | 19025712 | 19026404 | 19039666 | 19040351 |
| 599 NA18517 | [2515685 chr17 | 17 | 20299935 | 20300531 | 597    | 2   | -0.674846 | 0.09935  | 20299568 | 20300303 | 20300311 | 20300751 |
| 600 NA18517 | [2515685 chr17 | 17 | 20304465 | 20335856 | 31392  | 44  | 0.338183  | 0.021939 | 20304107 | 20304823 | 20335559 | 20336151 |
| 601 NA18517 | [2515685 chr17 | 17 | 21386421 | 21388859 | 2439   | 3   | -0.437966 | 0.085587 | 21386258 | 21386584 | 21388220 | 21389491 |
| 602 NA18517 | [2515685 chr17 | 17 | 21826349 | 21834752 | 8404   | 7   | 0.30869   | 0.049349 | 21826238 | 21826461 | 21833710 | 21835791 |
| 603 NA18517 | [2515685 chr17 | 17 | 21942843 | 21954909 | 12067  | 20  | -0.296492 | 0.032057 | 21942618 | 21943068 | 21954628 | 21955191 |
| 604 NA18517 | [2515685 chr17 | 17 | 22090184 | 22117008 | 26825  | 11  | -0.277642 | 0.042639 | 22080287 | 22092384 | 22116877 | 22117131 |
| 605 NA18517 | [2515685 chr17 | 17 | 23009572 | 23010538 | 967    | 2   | 0.547775  | 0.095938 | 23009093 | 23010051 | 23010060 | 23011011 |
| 606 NA18517 | [2515685 chr17 | 17 | 31430406 | 31838190 | 407785 | 549 | 0.574593  | 0.005537 | 31429658 | 31431155 | 31837915 | 31838461 |
| 607 NA18517 | [2515685 chr17 | 17 | 31843365 | 31888495 | 45131  | 78  | 0.574593  | 0.005537 | 31843183 | 31843547 | 31888204 | 31888781 |
| 608 NA18517 | [2515685 chr17 | 17 | 32829500 | 32835174 | 5675   | 6   | 0.755531  | 0.068032 | 32828825 | 32830175 | 32833793 | 32836551 |
| 609 NA18517 | [2515685 chr17 | 17 | 33324385 | 33348941 | 24557  | 16  | 0.255001  | 0.034472 | 33323841 | 33324930 | 33348664 | 33349211 |
| 610 NA18517 | [2515685 chr17 | 17 | 33351492 | 33558715 | 207224 | 270 | 0.44667   | 0.006889 | 33351397 | 33351588 | 33558424 | 33559001 |
| 611 NA18517 | [2515685 chr17 | 17 | 33583170 | 33656856 | 73687  | 127 | 0.44667   | 0.006889 | 33582987 | 33583353 | 33656725 | 33656981 |
| 612 NA18517 | [2515685 chr17 | 17 | 36636559 | 36685343 | 48785  | 45  | -0.471082 | 0.022451 | 36635767 | 36637352 | 36684647 | 36686041 |
| 613 NA18517 | [2515685 chr17 | 17 | 36991957 | 36995674 | 3718   | 4   | -0.534399 | 0.069312 | 36991285 | 36992630 | 36995333 | 36996011 |
| 614 NA18517 | [2515685 chr17 | 17 | 40979999 | 40984692 | 4694   | 11  | -0.276249 | 0.041367 | 40979788 | 40980211 | 40984398 | 40984981 |
| 615 NA18517 | [2515685 chr17 | 17 | 41035524 | 41036525 | 1002   | 2   | 0.888795  | 0.104736 | 41035120 | 41035928 | 41035967 | 41037081 |
| 616 NA18517 | [2515685 chr17 | 17 | 41675037 | 41676708 | 1672   | 2   | 0.888793  | 0.104736 | 41673805 | 41676270 | 41676309 | 41677101 |
| 617 NA18517 | [2515685 chr17 | 17 | 41770024 | 41921615 | 151592 | 148 | -0.336792 | 0.006736 | 41769768 | 41770281 | 41920590 | 41922641 |
| 618 NA18517 | [2515685 chr17 | 17 | 41987438 | 42137410 | 149973 | 142 | -0.336792 | 0.006736 | 41987182 | 41987695 | 42135210 | 42141941 |



|             |                |    |          |          |        |    |           |          |          |          |          |          |
|-------------|----------------|----|----------|----------|--------|----|-----------|----------|----------|----------|----------|----------|
| 619 NA18517 | [2515685 chr17 | 17 | 42983828 | 43026670 | 42843  | 61 | 0.671435  | 0.019619 | 42983488 | 42984168 | 43025568 | 4302777: |
| 620 NA18517 | [2515685 chr17 | 17 | 55368842 | 55372541 | 3700   | 5  | 0.391882  | 0.067602 | 55368278 | 55369406 | 55372325 | 5537275: |
| 621 NA18517 | [2515685 chr17 | 17 | 55434888 | 55452955 | 18068  | 34 | 0.375712  | 0.024281 | 55434445 | 55435332 | 55452577 | 5545333: |
| 622 NA18517 | [2515685 chr17 | 17 | 55457995 | 55459798 | 1804   | 2  | 0.859778  | 0.10928  | 55457669 | 55458322 | 55459168 | 5546042: |
| 623 NA18517 | [2515685 chr17 | 17 | 55550803 | 55552834 | 2032   | 2  | 0.859778  | 0.10928  | 55549945 | 55551662 | 55552508 | 5555316: |
| 624 NA18517 | [2515685 chr17 | 17 | 57655350 | 57667804 | 12455  | 17 | 0.374743  | 0.015212 | 57653396 | 57657305 | 57667259 | 5766834: |
| 625 NA18517 | [2515685 chr17 | 17 | 57681793 | 57708812 | 27020  | 57 | 0.374743  | 0.015212 | 57680114 | 57683473 | 57708467 | 5770915: |
| 626 NA18517 | [2515685 chr17 | 17 | 62482353 | 62484270 | 1918   | 2  | -0.541952 | 0.105422 | 62482048 | 62482658 | 62483557 | 6248498: |
| 627 NA18517 | [2515685 chr17 | 17 | 72727658 | 72744757 | 17100  | 17 | 0.335792  | 0.035738 | 72726533 | 72728783 | 72744067 | 7274544: |
| 628 NA18517 | [2515685 chr18 | 18 | 9805250  | 9806206  | 957    | 2  | -0.679404 | 0.107718 | 9804637  | 9805863  | 9806038  | 980637:  |
| 629 NA18517 | [2515685 chr18 | 18 | 28142218 | 28143399 | 1182   | 2  | 1.038496  | 0.124181 | 28141854 | 28142583 | 28143055 | 2814374: |
| 630 NA18517 | [2515685 chr18 | 18 | 42791945 | 42815378 | 23434  | 23 | 0.471877  | 0.029686 | 42749992 | 42796523 | 42810800 | 4288915: |
| 631 NA18517 | [2515685 chr18 | 18 | 74297715 | 74299391 | 1677   | 5  | -0.655757 | 0.064708 | 74297243 | 74298187 | 74299167 | 7429961: |
| 632 NA18517 | [2515685 chr18 | 18 | 74373005 | 74376367 | 3363   | 7  | -0.342316 | 0.049604 | 74372064 | 74373947 | 74375833 | 7437690: |
| 633 NA18517 | [2515685 chr18 | 18 | 74392800 | 74398225 | 5426   | 4  | 0.646153  | 0.075722 | 74390826 | 74394774 | 74397790 | 7439866: |
| 634 NA18517 | [2515685 chr19 | 19 | 58103    | 60766    | 2664   | 2  | 0.664028  | 0.100318 | 57927    | 58280    | 60510    | 61022    |
| 635 NA18517 | [2515685 chr19 | 19 | 249131   | 252671   | 3541   | 6  | -0.309623 | 0.053432 | 247972   | 250290   | 251836   | 253507   |
| 636 NA18517 | [2515685 chr19 | 19 | 310414   | 312953   | 2540   | 14 | -0.404988 | 0.038103 | 309687   | 311142   | 312913   | 31299:   |
| 637 NA18517 | [2515685 chr19 | 19 | 20388989 | 20510144 | 121156 | 67 | -0.516614 | 0.018842 | 20388802 | 20389176 | 20509558 | 2051073: |
| 638 NA18517 | [2515685 chr19 | 19 | 22150585 | 22151409 | 825    | 2  | -0.912157 | 0.148398 | 22150417 | 22150753 | 22151291 | 2215152: |
| 639 NA18517 | [2515685 chr19 | 19 | 22559495 | 22560841 | 1347   | 3  | -0.6503   | 0.092966 | 22559099 | 22559891 | 22560618 | 2256106: |
| 640 NA18517 | [2515685 chr19 | 19 | 22931049 | 22934541 | 3493   | 2  | 1.341879  | 0.118415 | 22918199 | 22933577 | 22934109 | 2293497: |
| 641 NA18517 | [2515685 chr19 | 19 | 23007903 | 23013841 | 5939   | 6  | 0.886319  | 0.06784  | 22990964 | 23010431 | 23013525 | 2301415: |
| 642 NA18517 | [2515685 chr19 | 19 | 23108259 | 23109446 | 1188   | 2  | 1.051488  | 0.119672 | 23107903 | 23108615 | 23108879 | 2311001: |
| 643 NA18517 | [2515685 chr19 | 19 | 23166066 | 23171357 | 5292   | 6  | 0.586062  | 0.061783 | 23165304 | 23166829 | 23170729 | 2317198: |
| 644 NA18517 | [2515685 chr19 | 19 | 23257205 | 23258538 | 1334   | 2  | -4.534315 | 0.268538 | 23256882 | 23257529 | 23258213 | 2325886: |
| 645 NA18517 | [2515685 chr19 | 19 | 24152645 | 24154351 | 1707   | 15 | -0.286799 | 0.038238 | 24152634 | 24152657 | 24153348 | 2415535: |
| 646 NA18517 | [2515685 chr19 | 19 | 39419837 | 39422498 | 2662   | 4  | 0.464803  | 0.079064 | 39419616 | 39420059 | 39421681 | 3942331: |
| 647 NA18517 | [2515685 chr19 | 19 | 39832413 | 39842049 | 9637   | 4  | -0.855335 | 0.085599 | 39832159 | 39832668 | 39839521 | 3984641: |
| 648 NA18517 | [2515685 chr19 | 19 | 41450186 | 41493613 | 43428  | 28 | 0.450339  | 0.026674 | 41421528 | 41452714 | 41491085 | 4149785: |
| 649 NA18517 | [2515685 chr19 | 19 | 42450472 | 42487512 | 37041  | 33 | 0.42522   | 0.024068 | 42413600 | 42453000 | 42486487 | 4248853: |
| 650 NA18517 | [2515685 chr19 | 19 | 44914561 | 44919210 | 4650   | 6  | -0.299595 | 0.059764 | 44913308 | 44915815 | 44918867 | 4491955: |
| 651 NA18517 | [2515685 chr19 | 19 | 48283617 | 48344337 | 60721  | 25 | 0.349155  | 0.030481 | 48282971 | 48284263 | 48343479 | 4834519: |
| 652 NA18517 | [2515685 chr19 | 19 | 48406765 | 48454609 | 47845  | 28 | 0.354194  | 0.028162 | 48406231 | 48407299 | 48454362 | 4845485: |
| 653 NA18517 | [2515685 chr19 | 19 | 48470790 | 48478850 | 8061   | 10 | 0.365497  | 0.048459 | 48469979 | 48471602 | 48478689 | 4847901: |
| 654 NA18517 | [2515685 chr19 | 19 | 49861558 | 49864037 | 2480   | 2  | -0.894218 | 0.093397 | 49861247 | 49861870 | 49862236 | 4986583: |
| 655 NA18517 | [2515685 chr19 | 19 | 58209430 | 58246367 | 36938  | 29 | -0.775626 | 0.028322 | 58208997 | 58209863 | 58245896 | 5824683: |
| 656 NA18517 | [2515685 chr19 | 19 | 59247755 | 59252061 | 4307   | 5  | 0.814197  | 0.0712   | 59246427 | 59249084 | 59251854 | 5925226: |
| 657 NA18517 | [2515685 chr19 | 19 | 59417162 | 59421597 | 4436   | 7  | -0.350186 | 0.052514 | 59416759 | 59417566 | 59421354 | 5942184: |
| 658 NA18517 | [2515685 chr19 | 19 | 59422281 | 59435274 | 12994  | 15 | -0.779559 | 0.039976 | 59421840 | 59422722 | 59435027 | 5943552: |
| 659 NA18517 | [2515685 chr19 | 19 | 59492384 | 59493822 | 1439   | 2  | 0.63958   | 0.106178 | 59491977 | 59492791 | 59493600 | 5949404: |
| 660 NA18517 | [2515685 chr19 | 19 | 60958920 | 60976029 | 17110  | 15 | -1.165634 | 0.042372 | 60957933 | 60959907 | 60975748 | 6097631: |
| 661 NA18517 | [2515685 chr20 | 20 | 1500976  | 1511097  | 10122  | 11 | -0.398428 | 0.041786 | 1500749  | 1501203  | 1510534  | 151166:  |
| 662 NA18517 | [2515685 chr20 | 20 | 1511097  | 1532477  | 21381  | 26 | -2.363227 | 0.048675 | 1510534  | 1511660  | 1532182  | 153277:  |
| 663 NA18517 | [2515685 chr20 | 20 | 1533078  | 1544060  | 10983  | 16 | -0.470855 | 0.034624 | 1532773  | 1533384  | 1543588  | 154453:  |
| 664 NA18517 | [2515685 chr20 | 20 | 44395410 | 44397048 | 1639   | 2  | -0.496459 | 0.099167 | 44395132 | 44395689 | 44396624 | 4439747: |
| 665 NA18517 | [2515685 chr20 | 20 | 45887273 | 45889273 | 2001   | 2  | -0.54448  | 0.099826 | 45886899 | 45887647 | 45888652 | 4588989: |
| 666 NA18517 | [2515685 chr20 | 20 | 59951513 | 59957050 | 5538   | 18 | 1.021099  | 0.035724 | 59950681 | 59952345 | 59956538 | 5995756: |
| 667 NA18517 | [2515685 chr20 | 20 | 59979365 | 59980324 | 960    | 3  | 0.500891  | 0.095502 | 59979109 | 59979622 | 59979994 | 5998065: |
| 668 NA18517 | [2515685 chr20 | 20 | 61708834 | 61711805 | 2972   | 22 | -0.420506 | 0.030515 | 61708573 | 61709096 | 61711616 | 6171199: |
| 669 NA18517 | [2515685 chr20 | 20 | 62113559 | 62114878 | 1320   | 18 | -0.549631 | 0.036711 | 62113491 | 62113628 | 62114687 | 6211507: |
| 670 NA18517 | [2515685 chr20 | 20 | 62233505 | 62235897 | 2393   | 4  | 0.499688  | 0.06403  | 62232847 | 62234163 | 62235101 | 6223669: |
| 671 NA18517 | [2515685 chr20 | 20 | 62414559 | 62429848 | 15290  | 13 | -0.35591  | 0.041961 | 62406565 | 62417970 | 62429329 | 6243036: |
| 672 NA18517 | [2515685 chr21 | 21 | 10042211 | 10076005 | 33795  | 42 | 0.325055  | 0.022705 | 10041840 | 10042583 | 10045742 | 1007626: |
| 673 NA18517 | [2515685 chr21 | 21 | 10111093 | 10114169 | 3077   | 3  | 0.46293   | 0.075341 | 10110744 | 10111443 | 10113120 | 1011521: |

|             |                |    |           |           |        |     |           |          |           |           |           |          |
|-------------|----------------|----|-----------|-----------|--------|-----|-----------|----------|-----------|-----------|-----------|----------|
| 674 NA18517 | [2515685 chr21 | 21 | 22108709  | 22109827  | 1119   | 2   | -0.795902 | 0.103431 | 22108337  | 22109081  | 22109454  | 22110207 |
| 675 NA18517 | [2515685 chr22 | 22 | 16994271  | 16998336  | 4066   | 2   | 1.419345  | 0.11046  | 16994031  | 16994511  | 16995658  | 17001727 |
| 676 NA18517 | [2515685 chr22 | 22 | 17032140  | 17127114  | 94975  | 145 | 0.307909  | 0.007552 | 17031480  | 17032801  | 17125408  | 17128827 |
| 677 NA18517 | [2515685 chr22 | 22 | 17142194  | 17254756  | 112563 | 194 | 0.307909  | 0.007552 | 17141910  | 17142478  | 17252078  | 17259087 |
| 678 NA18517 | [2515685 chr22 | 22 | 17385504  | 17394963  | 9460   | 17  | -0.42346  | 0.035746 | 17385031  | 17385977  | 17394595  | 17395337 |
| 679 NA18517 | [2515685 chr22 | 22 | 18701702  | 18732156  | 30455  | 44  | 0.32767   | 0.021722 | 18701563  | 18701841  | 18730454  | 18733851 |
| 680 NA18517 | [2515685 chr22 | 22 | 18744519  | 18863336  | 118818 | 145 | -0.408055 | 0.012189 | 18742262  | 18746777  | 18863099  | 18863577 |
| 681 NA18517 | [2515685 chr22 | 22 | 18950330  | 18975811  | 25482  | 44  | 0.388703  | 0.021632 | 18947821  | 18952840  | 18975645  | 18975971 |
| 682 NA18517 | [2515685 chr22 | 22 | 19032736  | 19041529  | 8794   | 2   | 0.856514  | 0.114777 | 19032008  | 19033465  | 19040908  | 19042151 |
| 683 NA18517 | [2515685 chr22 | 22 | 19380073  | 19419484  | 39412  | 12  | -0.396134 | 0.043055 | 19377752  | 19382395  | 19416806  | 19449921 |
| 684 NA18517 | [2515685 chr22 | 22 | 19791149  | 19793611  | 2463   | 6   | 0.478267  | 0.058056 | 19791060  | 19791239  | 19793348  | 19793871 |
| 685 NA18517 | [2515685 chr22 | 22 | 19811736  | 19821124  | 9389   | 16  | 0.460419  | 0.036847 | 19811477  | 19811995  | 19820762  | 19821481 |
| 686 NA18517 | [2515685 chr22 | 22 | 19852244  | 19873608  | 21365  | 46  | 0.364184  | 0.021052 | 19852072  | 19852416  | 19873545  | 19873677 |
| 687 NA18517 | [2515685 chr22 | 22 | 19915692  | 19936674  | 20983  | 28  | 0.554726  | 0.027369 | 19915439  | 19915945  | 19936014  | 19937337 |
| 688 NA18517 | [2515685 chr22 | 22 | 19947091  | 19956787  | 9697   | 14  | 0.457429  | 0.039188 | 19946730  | 19947453  | 19956235  | 19957341 |
| 689 NA18517 | [2515685 chr22 | 22 | 19973569  | 19998239  | 24671  | 48  | 0.38142   | 0.02058  | 19972287  | 19974851  | 19998067  | 19998417 |
| 690 NA18517 | [2515685 chr22 | 22 | 20035209  | 20121795  | 86587  | 138 | -0.370596 | 0.008447 | 20034972  | 20035446  | 20121548  | 20122047 |
| 691 NA18517 | [2515685 chr22 | 22 | 20137248  | 20243639  | 106392 | 148 | -0.370596 | 0.008447 | 20136561  | 20137935  | 20240961  | 20302287 |
| 692 NA18517 | [2515685 chr22 | 22 | 22688523  | 22690382  | 1860   | 2   | -1.12194  | 0.123361 | 22687378  | 22689669  | 22690146  | 22690611 |
| 693 NA18517 | [2515685 chr22 | 22 | 22985370  | 22986040  | 671    | 3   | 0.481036  | 0.083512 | 22985041  | 22985699  | 22985733  | 22986347 |
| 694 NA18517 | [2515685 chr22 | 22 | 22995064  | 22998522  | 3459   | 9   | 0.297953  | 0.051468 | 22994927  | 22995201  | 22997635  | 22999401 |
| 695 NA18517 | [2515685 chr22 | 22 | 25351602  | 25356569  | 4968   | 3   | 0.524954  | 0.100148 | 25350914  | 25352291  | 25355824  | 25357317 |
| 696 NA18517 | [2515685 chr22 | 22 | 33619409  | 33623490  | 4082   | 5   | 0.808693  | 0.066958 | 33618939  | 33619879  | 33622642  | 33624331 |
| 697 NA18517 | [2515685 chr22 | 22 | 36443976  | 36445478  | 1503   | 3   | -0.471056 | 0.073936 | 36443462  | 36444491  | 36445433  | 36445527 |
| 698 NA18517 | [2515685 chr22 | 22 | 41235714  | 41278526  | 42813  | 31  | 0.255401  | 0.026278 | 41235467  | 41235962  | 41278339  | 41278717 |
| 1 NA12740   | [2515685 chr1  | 1  | 586550    | 587572    | 1023   | 5   | 0.474143  | 0.065149 | 586277    | 586824    | 587344    | 587800   |
| 2 NA12740   | [2515685 chr1  | 1  | 601041    | 612159    | 11119  | 8   | -1.058252 | 0.053805 | 587801    | 604315    | 610122    | 614196   |
| 3 NA12740   | [2515685 chr1  | 1  | 791750    | 795173    | 3424   | 5   | 0.406838  | 0.061566 | 791750    | 791750    | 794870    | 795476   |
| 4 NA12740   | [2515685 chr1  | 1  | 795173    | 798581    | 3409   | 6   | 0.90745   | 0.063228 | 794870    | 795476    | 798209    | 798953   |
| 5 NA12740   | [2515685 chr1  | 1  | 1649075   | 1715812   | 66738  | 83  | -0.335177 | 0.01546  | 1597760   | 1652349   | 1715548   | 1716076  |
| 6 NA12740   | [2515685 chr1  | 1  | 1853012   | 1854645   | 1634   | 2   | 1.059124  | 0.099097 | 1852616   | 1853409   | 1853816   | 1855474  |
| 7 NA12740   | [2515685 chr1  | 1  | 10416438  | 10418311  | 1874   | 2   | -0.815958 | 0.095373 | 10415863  | 10417014  | 10417712  | 10418917 |
| 8 NA12740   | [2515685 chr1  | 1  | 10687939  | 10690748  | 2810   | 2   | 0.761792  | 0.130877 | 10687193  | 10688686  | 10690463  | 10691037 |
| 9 NA12740   | [2515685 chr1  | 1  | 12843376  | 12851108  | 7733   | 12  | 0.441556  | 0.041607 | 12843104  | 12843649  | 12850914  | 12851307 |
| 10 NA12740  | [2515685 chr1  | 1  | 12884329  | 12886858  | 2530   | 4   | 0.526849  | 0.061534 | 12884224  | 12884434  | 12886536  | 12887181 |
| 11 NA12740  | [2515685 chr1  | 1  | 12926542  | 12926956  | 415    | 2   | -0.757065 | 0.123002 | 12926307  | 12926778  | 12926804  | 12927101 |
| 12 NA12740  | [2515685 chr1  | 1  | 13159940  | 13162706  | 2767   | 4   | 0.551333  | 0.058101 | 13159618  | 13160263  | 13162366  | 13163047 |
| 13 NA12740  | [2515685 chr1  | 1  | 13380737  | 13383503  | 2767   | 4   | 0.551333  | 0.058101 | 13380415  | 13381060  | 13383163  | 13383847 |
| 14 NA12740  | [2515685 chr1  | 1  | 16723148  | 16728150  | 5003   | 11  | 0.290342  | 0.042656 | 16722924  | 16723372  | 16728032  | 16728261 |
| 15 NA12740  | [2515685 chr1  | 1  | 16823179  | 16828824  | 5646   | 11  | 0.28615   | 0.04239  | 16822798  | 16823561  | 16828560  | 16829081 |
| 16 NA12740  | [2515685 chr1  | 1  | 16975161  | 17005532  | 30372  | 34  | -0.277324 | 0.025704 | 16974917  | 16975406  | 17006416  | 17006441 |
| 17 NA12740  | [2515685 chr1  | 1  | 30407974  | 30409303  | 1330   | 2   | -0.99136  | 0.108122 | 30407563  | 30408386  | 30409034  | 30409577 |
| 18 NA12740  | [2515685 chr1  | 1  | 72478372  | 72524180  | 45809  | 36  | -2.690253 | 0.043638 | 72478140  | 72478604  | 72523661  | 72524701 |
| 19 NA12740  | [2515685 chr1  | 1  | 105847860 | 105852177 | 4318   | 2   | -0.842849 | 0.121303 | 105846921 | 105848800 | 105849105 | 10585525 |
| 20 NA12740  | [2515685 chr1  | 1  | 108444641 | 108449550 | 4910   | 9   | 0.852723  | 0.051282 | 108443817 | 108445466 | 108449224 | 10844987 |
| 21 NA12740  | [2515685 chr1  | 1  | 108514938 | 108565175 | 50238  | 59  | 0.354395  | 0.019494 | 108514864 | 108515012 | 108565023 | 10856532 |
| 22 NA12740  | [2515685 chr1  | 1  | 108638318 | 108688767 | 50450  | 59  | 0.352119  | 0.019393 | 108638254 | 108638383 | 108688693 | 10868884 |
| 23 NA12740  | [2515685 chr1  | 1  | 112405902 | 112416691 | 10790  | 10  | 0.680776  | 0.051168 | 112405415 | 112406389 | 112416423 | 11241696 |
| 24 NA12740  | [2515685 chr1  | 1  | 141918111 | 141918521 | 411    | 2   | 0.883035  | 0.088944 | 141917953 | 141918270 | 141918279 | 14191876 |
| 25 NA12740  | [2515685 chr1  | 1  | 143868514 | 143870082 | 1569   | 2   | 0.667224  | 0.119563 | 143868147 | 143868882 | 143869354 | 14387081 |
| 26 NA12740  | [2515685 chr1  | 1  | 145046862 | 145047267 | 406    | 2   | 0.883076  | 0.088947 | 145046708 | 145047016 | 145047025 | 14504750 |
| 27 NA12740  | [2515685 chr1  | 1  | 145819039 | 145839481 | 20443  | 24  | 0.395721  | 0.030407 | 145818915 | 145819164 | 145839093 | 14583986 |
| 28 NA12740  | [2515685 chr1  | 1  | 145855190 | 145859584 | 4395   | 3   | 0.690641  | 0.086686 | 145848112 | 145858464 | 145859395 | 14585977 |
| 29 NA12740  | [2515685 chr1  | 1  | 145896002 | 145899638 | 3637   | 3   | 0.731775  | 0.094676 | 145894632 | 145897372 | 145899362 | 14589991 |
| 30 NA12740  | [2515685 chr1  | 1  | 145929568 | 145951531 | 21964  | 26  | 0.487468  | 0.029017 | 145929405 | 145929732 | 145951467 | 14595159 |

|            |               |   |           |           |        |     |           |          |           |           |           |          |
|------------|---------------|---|-----------|-----------|--------|-----|-----------|----------|-----------|-----------|-----------|----------|
| 31 NA12740 | [2515685 chr1 | 1 | 145958491 | 145960052 | 1562   | 2   | 0.699599  | 0.110601 | 145957782 | 145959200 | 145959639 | 14596046 |
| 32 NA12740 | [2515685 chr1 | 1 | 146389143 | 146389545 | 403    | 2   | 0.883035  | 0.088944 | 146388901 | 146389385 | 146389393 | 14638969 |
| 33 NA12740 | [2515685 chr1 | 1 | 146808546 | 146809451 | 906    | 2   | -0.732096 | 0.10601  | 146808090 | 146809003 | 146809142 | 14680976 |
| 34 NA12740 | [2515685 chr1 | 1 | 148998878 | 149005918 | 7041   | 13  | 0.905912  | 0.036197 | 148998401 | 148999355 | 149004680 | 14900715 |
| 35 NA12740 | [2515685 chr1 | 1 | 149368571 | 149401669 | 33099  | 23  | 0.821369  | 0.033088 | 149368105 | 149369038 | 149399791 | 14940354 |
| 36 NA12740 | [2515685 chr1 | 1 | 158292764 | 158377943 | 85180  | 101 | -0.262111 | 0.014189 | 158292386 | 158293142 | 158377670 | 15837821 |
| 37 NA12740 | [2515685 chr1 | 1 | 193443495 | 193446696 | 3202   | 4   | 0.371502  | 0.068923 | 193443280 | 193443710 | 193446478 | 19344691 |
| 38 NA12740 | [2515685 chr1 | 1 | 193449243 | 193542964 | 93722  | 82  | 0.545914  | 0.016607 | 193449010 | 193449476 | 193542871 | 19354305 |
| 39 NA12740 | [2515685 chr1 | 1 | 193627959 | 193648606 | 20648  | 16  | 0.299428  | 0.036668 | 193627569 | 193628349 | 193648353 | 19364886 |
| 40 NA12740 | [2515685 chr1 | 1 | 204210291 | 204216431 | 6141   | 9   | 0.30313   | 0.049076 | 204210088 | 204210494 | 204216019 | 20421684 |
| 41 NA12740 | [2515685 chr1 | 1 | 209390853 | 209402508 | 11656  | 9   | -0.775733 | 0.054314 | 209390492 | 209391215 | 209401777 | 20940323 |
| 42 NA12740 | [2515685 chr1 | 1 | 220569995 | 220571400 | 1406   | 2   | 0.584719  | 0.097009 | 220569448 | 220570543 | 220571101 | 22057170 |
| 43 NA12740 | [2515685 chr1 | 1 | 233202665 | 233204956 | 2292   | 42  | -0.380139 | 0.020355 | 233202312 | 233203018 | 233204364 | 23320554 |
| 44 NA12740 | [2515685 chr1 | 1 | 236719047 | 236720968 | 1922   | 3   | -0.967963 | 0.086049 | 236718751 | 236719344 | 236720749 | 23672118 |
| 45 NA12740 | [2515685 chr1 | 1 | 239367166 | 239493768 | 126603 | 16  | -0.353851 | 0.037291 | 239366598 | 239367734 | 239491355 | 23949618 |
| 46 NA12740 | [2515685 chr1 | 1 | 243009520 | 243011368 | 1849   | 3   | -0.566347 | 0.082824 | 243008430 | 243010610 | 243011204 | 24301153 |
| 47 NA12740 | [2515685 chr1 | 1 | 244850108 | 244851538 | 1431   | 2   | 0.649005  | 0.113415 | 244849536 | 244850681 | 244851004 | 24485207 |
| 48 NA12740 | [2515685 chr1 | 1 | 244872415 | 244874098 | 1684   | 5   | 0.485079  | 0.071718 | 244872245 | 244872585 | 244873799 | 24487439 |
| 49 NA12740 | [2515685 chr1 | 1 | 244935197 | 244936698 | 1502   | 4   | -0.687269 | 0.078379 | 244934954 | 244935441 | 244936297 | 24493710 |
| 50 NA12740 | [2515685 chr2 | 2 | 388500    | 390704    | 2205   | 6   | 0.401514  | 0.062859 | 387915    | 389086    | 390173    | 391236   |
| 51 NA12740 | [2515685 chr2 | 2 | 13508038  | 13511508  | 3471   | 7   | -0.526665 | 0.060017 | 13507783  | 13508293  | 13510995  | 1351202  |
| 52 NA12740 | [2515685 chr2 | 2 | 35896470  | 35905939  | 9470   | 3   | -0.856052 | 0.084497 | 35879425  | 35899430  | 35902979  | 3590982  |
| 53 NA12740 | [2515685 chr2 | 2 | 37869648  | 37912159  | 42512  | 44  | 0.325578  | 0.021514 | 37869077  | 37870220  | 37911733  | 3791258  |
| 54 NA12740 | [2515685 chr2 | 2 | 44378695  | 44380701  | 2007   | 3   | -0.795539 | 0.079812 | 44378636  | 44378754  | 44379703  | 4438169  |
| 55 NA12740 | [2515685 chr2 | 2 | 52661573  | 52696869  | 35297  | 26  | -0.843742 | 0.030392 | 52661218  | 52661928  | 52664616  | 5269732  |
| 56 NA12740 | [2515685 chr2 | 2 | 56563617  | 56567381  | 3765   | 2   | 3.374674  | 0.227806 | 56556559  | 56566577  | 56567035  | 5656772  |
| 57 NA12740 | [2515685 chr2 | 2 | 60024765  | 60026526  | 1762   | 2   | -0.469512 | 0.089011 | 60024397  | 60025133  | 60026105  | 6002694  |
| 58 NA12740 | [2515685 chr2 | 2 | 61675589  | 61676777  | 1189   | 2   | 1.587444  | 0.145    | 61675200  | 61675979  | 61676468  | 6167708  |
| 59 NA12740 | [2515685 chr2 | 2 | 73923306  | 73948487  | 25182  | 40  | -0.597489 | 0.018988 | 73923019  | 73923593  | 73948060  | 7394891  |
| 60 NA12740 | [2515685 chr2 | 2 | 75296507  | 75298934  | 2428   | 2   | 1.126267  | 0.111054 | 75296056  | 75296959  | 75298532  | 7529933  |
| 61 NA12740 | [2515685 chr2 | 2 | 87965257  | 88098957  | 133701 | 11  | 0.281055  | 0.045344 | 87964592  | 87965922  | 88097049  | 8810086  |
| 62 NA12740 | [2515685 chr2 | 2 | 88121895  | 88126839  | 4945   | 8   | 0.271812  | 0.050197 | 88121607  | 88122184  | 88126458  | 8812722  |
| 63 NA12740 | [2515685 chr2 | 2 | 94985753  | 94998325  | 12573  | 8   | -0.272704 | 0.051959 | 94984352  | 94987154  | 94996579  | 9500007  |
| 64 NA12740 | [2515685 chr2 | 2 | 97184386  | 97189742  | 5357   | 2   | -0.810338 | 0.108703 | 97182781  | 97185992  | 97186782  | 9719672  |
| 65 NA12740 | [2515685 chr2 | 2 | 97281087  | 97298228  | 17142  | 27  | -0.392373 | 0.027386 | 97281084  | 97281091  | 97297910  | 9729854  |
| 66 NA12740 | [2515685 chr2 | 2 | 97333935  | 97334505  | 571    | 2   | 0.539359  | 0.091475 | 97333614  | 97334256  | 97334257  | 9733475  |
| 67 NA12740 | [2515685 chr2 | 2 | 97585284  | 97585854  | 571    | 2   | 0.53936   | 0.091475 | 97585036  | 97585532  | 97585533  | 9758617  |
| 68 NA12740 | [2515685 chr2 | 2 | 97613796  | 97614932  | 1137   | 2   | 1.695646  | 0.138706 | 97613553  | 97614040  | 97614467  | 9761539  |
| 69 NA12740 | [2515685 chr2 | 2 | 108313968 | 108314875 | 908    | 2   | 0.710998  | 0.110637 | 108313664 | 108314272 | 108314680 | 10831507 |
| 70 NA12740 | [2515685 chr2 | 2 | 111696774 | 111699147 | 2374   | 16  | 0.252608  | 0.037233 | 111696413 | 111697136 | 111698899 | 11169939 |
| 71 NA12740 | [2515685 chr2 | 2 | 126159437 | 126168349 | 8913   | 3   | -0.878194 | 0.086139 | 126158494 | 126160381 | 126168048 | 12616865 |
| 72 NA12740 | [2515685 chr2 | 2 | 129354604 | 129360182 | 5579   | 4   | -5.047376 | 0.202548 | 129354317 | 129354892 | 129357659 | 12936270 |
| 73 NA12740 | [2515685 chr2 | 2 | 130405124 | 130452105 | 46982  | 48  | -0.321714 | 0.015391 | 130405077 | 130405172 | 130451558 | 13045265 |
| 74 NA12740 | [2515685 chr2 | 2 | 130454948 | 130483330 | 28383  | 36  | -0.321714 | 0.015391 | 130454772 | 130455124 | 130483142 | 13048351 |
| 75 NA12740 | [2515685 chr2 | 2 | 130498888 | 130502777 | 3890   | 9   | -0.34264  | 0.047798 | 130498600 | 130499176 | 130502508 | 13050304 |
| 76 NA12740 | [2515685 chr2 | 2 | 130583481 | 130593482 | 10002  | 22  | -0.273302 | 0.031452 | 130583180 | 130583782 | 130593434 | 13059353 |
| 77 NA12740 | [2515685 chr2 | 2 | 130884280 | 130895798 | 11519  | 20  | -0.276403 | 0.031712 | 130883963 | 130884597 | 130893881 | 13089771 |
| 78 NA12740 | [2515685 chr2 | 2 | 131290822 | 131301010 | 10189  | 17  | -0.273644 | 0.032667 | 131288905 | 131292739 | 131300558 | 13130146 |
| 79 NA12740 | [2515685 chr2 | 2 | 131765074 | 131783622 | 18549  | 29  | -0.403373 | 0.026778 | 131749458 | 131768034 | 131783274 | 13178397 |
| 80 NA12740 | [2515685 chr2 | 2 | 131810915 | 131823406 | 12492  | 28  | -0.266946 | 0.027884 | 131810493 | 131811338 | 131823142 | 13182367 |
| 81 NA12740 | [2515685 chr2 | 2 | 131845027 | 131871669 | 26643  | 48  | -0.25128  | 0.019854 | 131844542 | 131845513 | 131869538 | 13187380 |
| 82 NA12740 | [2515685 chr2 | 2 | 131897483 | 131907608 | 10126  | 14  | -0.324056 | 0.037891 | 131895593 | 131899373 | 131907180 | 13190803 |
| 83 NA12740 | [2515685 chr2 | 2 | 131917827 | 131953962 | 36136  | 49  | -0.346374 | 0.021215 | 131917559 | 131918096 | 131953571 | 13195435 |
| 84 NA12740 | [2515685 chr2 | 2 | 132127472 | 132131387 | 3916   | 2   | -0.492436 | 0.084365 | 132127160 | 132127784 | 132128427 | 13213581 |
| 85 NA12740 | [2515685 chr2 | 2 | 132166989 | 132168954 | 1966   | 2   | -0.744568 | 0.116794 | 132166576 | 132167403 | 132168350 | 13216955 |

|             |               |   |           |           |        |     |           |          |           |           |           |          |
|-------------|---------------|---|-----------|-----------|--------|-----|-----------|----------|-----------|-----------|-----------|----------|
| 86 NA12740  | [2515685 chr2 | 2 | 132230488 | 132323964 | 93477  | 117 | -0.394774 | 0.013404 | 132230033 | 132230944 | 132323290 | 13232463 |
| 87 NA12740  | [2515685 chr2 | 2 | 132334309 | 132340886 | 6578   | 5   | -0.526874 | 0.063651 | 132333497 | 132335122 | 132340628 | 13234114 |
| 88 NA12740  | [2515685 chr2 | 2 | 132871605 | 132873051 | 1447   | 2   | 1.297228  | 0.132857 | 132871306 | 132871904 | 132872791 | 13287331 |
| 89 NA12740  | [2515685 chr2 | 2 | 153495543 | 153499409 | 3867   | 2   | 0.847846  | 0.11833  | 153484545 | 153498503 | 153498846 | 15349997 |
| 90 NA12740  | [2515685 chr2 | 2 | 208176479 | 208184457 | 7979   | 7   | 0.930282  | 0.059635 | 208176093 | 208176865 | 208183930 | 20818498 |
| 91 NA12740  | [2515685 chr2 | 2 | 232512469 | 232537143 | 24675  | 6   | -0.406106 | 0.049435 | 232511142 | 232513796 | 232534243 | 23254004 |
| 92 NA12740  | [2515685 chr2 | 2 | 242430340 | 242432140 | 1801   | 2   | -0.798769 | 0.120543 | 242430091 | 242430589 | 242431346 | 24243293 |
| 93 NA12740  | [2515685 chr2 | 2 | 242664580 | 242668683 | 4104   | 10  | 0.905428  | 0.038734 | 242664284 | 242664877 | 242668532 | 24266883 |
| 94 NA12740  | [2515685 chr2 | 2 | 242744891 | 242746975 | 2085   | 2   | 0.674531  | 0.101354 | 242744175 | 242745607 | 242746058 | 24274789 |
| 95 NA12740  | [2515685 chr3 | 3 | 154904    | 157210    | 2307   | 2   | -0.569805 | 0.102344 | 154511    | 155297    | 156642    | 157775   |
| 96 NA12740  | [2515685 chr3 | 3 | 1757211   | 1765710   | 8500   | 2   | 0.895533  | 0.116082 | 1756096   | 1758327   | 1762058   | 179730   |
| 97 NA12740  | [2515685 chr3 | 3 | 47798187  | 47799322  | 1136   | 4   | 0.524052  | 0.071382 | 47797874  | 47798501  | 47799000  | 4779964  |
| 98 NA12740  | [2515685 chr3 | 3 | 75783104  | 75790304  | 7201   | 7   | -0.347409 | 0.056368 | 75782154  | 75784054  | 75789914  | 7579069  |
| 99 NA12740  | [2515685 chr3 | 3 | 75841822  | 75879757  | 37936  | 21  | 0.438888  | 0.030156 | 75836910  | 75845474  | 75876105  | 7589177  |
| 100 NA12740 | [2515685 chr3 | 3 | 100426489 | 100432540 | 6052   | 6   | -0.929577 | 0.064287 | 100426149 | 100426829 | 100431494 | 10043358 |
| 101 NA12740 | [2515685 chr3 | 3 | 105292696 | 105520474 | 227779 | 6   | 0.359937  | 0.060996 | 105204462 | 105296348 | 105516822 | 10553282 |
| 102 NA12740 | [2515685 chr3 | 3 | 107702626 | 107705435 | 2810   | 4   | 0.473567  | 0.072096 | 107702453 | 107702799 | 107704855 | 10770601 |
| 103 NA12740 | [2515685 chr3 | 3 | 131153247 | 131155010 | 1764   | 2   | -0.50489  | 0.098215 | 131153050 | 131153444 | 131154388 | 13115563 |
| 104 NA12740 | [2515685 chr3 | 3 | 133191392 | 133196576 | 5185   | 5   | -0.811657 | 0.067884 | 133190820 | 133191965 | 133195824 | 13319732 |
| 105 NA12740 | [2515685 chr3 | 3 | 139315695 | 139316879 | 1185   | 2   | 0.799259  | 0.121795 | 139315497 | 139315894 | 139316463 | 13931729 |
| 106 NA12740 | [2515685 chr3 | 3 | 164199936 | 164205886 | 5951   | 6   | -0.671187 | 0.068542 | 164199686 | 164200187 | 164204674 | 16420709 |
| 107 NA12740 | [2515685 chr3 | 3 | 191219813 | 191223326 | 3514   | 4   | 0.811689  | 0.057603 | 191219291 | 191220336 | 191222918 | 19122373 |
| 108 NA12740 | [2515685 chr3 | 3 | 192547312 | 192554331 | 7020   | 10  | -2.845574 | 0.086957 | 192546950 | 192547674 | 192554127 | 19255453 |
| 109 NA12740 | [2515685 chr3 | 3 | 194357854 | 194368035 | 10182  | 12  | 2.230928  | 0.072344 | 194357665 | 194358044 | 194367817 | 19436825 |
| 110 NA12740 | [2515685 chr3 | 3 | 194883325 | 194885627 | 2303   | 2   | -0.549773 | 0.106723 | 194881986 | 194884665 | 194885401 | 19488585 |
| 111 NA12740 | [2515685 chr3 | 3 | 196869732 | 196966359 | 96628  | 111 | -0.612501 | 0.014267 | 196868922 | 196870542 | 196966111 | 19696660 |
| 112 NA12740 | [2515685 chr3 | 3 | 196991681 | 197002965 | 11285  | 19  | 0.479277  | 0.034296 | 196991423 | 196991939 | 197002044 | 19700388 |
| 113 NA12740 | [2515685 chr3 | 3 | 197147744 | 197168704 | 20961  | 23  | -0.273626 | 0.030844 | 197139274 | 197151396 | 197168460 | 19716894 |
| 114 NA12740 | [2515685 chr3 | 3 | 197171267 | 197226837 | 55571  | 76  | -0.401364 | 0.016336 | 197170913 | 197171622 | 197225559 | 19722811 |
| 115 NA12740 | [2515685 chr3 | 3 | 198674426 | 198675470 | 1045   | 6   | -0.62099  | 0.047854 | 198674161 | 198674692 | 198674903 | 19867603 |
| 116 NA12740 | [2515685 chr3 | 3 | 198823618 | 198882515 | 58898  | 66  | -0.343701 | 0.017874 | 198823303 | 198823933 | 198882172 | 19888285 |
| 117 NA12740 | [2515685 chr3 | 3 | 199313925 | 199321063 | 7139   | 15  | 1.32983   | 0.035294 | 199313515 | 199314336 | 199320844 | 19932128 |
| 118 NA12740 | [2515685 chr3 | 3 | 199353205 | 199359802 | 6598   | 11  | 0.466167  | 0.04247  | 199352757 | 199353654 | 199359116 | 19936048 |
| 119 NA12740 | [2515685 chr4 | 4 | 639659    | 640828    | 1170   | 2   | 0.919098  | 0.127484 | 639291    | 640028    | 640478    | 641178   |
| 120 NA12740 | [2515685 chr4 | 4 | 728045    | 731845    | 3801   | 2   | 0.625493  | 0.099047 | 727736    | 728355    | 731532    | 732155   |
| 121 NA12740 | [2515685 chr4 | 4 | 3706113   | 3709248   | 3136   | 5   | -0.350151 | 0.060462 | 3705707   | 3706519   | 3708745   | 370975   |
| 122 NA12740 | [2515685 chr4 | 4 | 8739800   | 8756949   | 17150  | 26  | 1.019857  | 0.02424  | 8739551   | 8740049   | 8756813   | 875708   |
| 123 NA12740 | [2515685 chr4 | 4 | 9001573   | 9046719   | 45147  | 86  | 0.497009  | 0.01284  | 9001243   | 9001903   | 9046129   | 904730   |
| 124 NA12740 | [2515685 chr4 | 4 | 9812346   | 9813108   | 763    | 33  | 0.391522  | 0.020228 | 9812284   | 9812408   | 9812952   | 981326   |
| 125 NA12740 | [2515685 chr4 | 4 | 9887220   | 9911397   | 24178  | 31  | 2.011673  | 0.042868 | 9886886   | 9887555   | 9910388   | 991240   |
| 126 NA12740 | [2515685 chr4 | 4 | 34602797  | 34650994  | 48198  | 45  | 0.813585  | 0.024134 | 34601994  | 34603600  | 34649535  | 3465245  |
| 127 NA12740 | [2515685 chr4 | 4 | 64522941  | 64543857  | 20917  | 20  | -0.779838 | 0.037366 | 64522682  | 64523201  | 64542552  | 6454516  |
| 128 NA12740 | [2515685 chr4 | 4 | 69203228  | 69319814  | 116587 | 70  | 1.193009  | 0.024023 | 69202934  | 69203523  | 69319569  | 6932005  |
| 129 NA12740 | [2515685 chr4 | 4 | 69319814  | 69341211  | 21398  | 18  | 0.326396  | 0.019248 | 69319569  | 69320059  | 69340966  | 6934145  |
| 130 NA12740 | [2515685 chr4 | 4 | 69347741  | 69365270  | 17530  | 21  | 0.326396  | 0.019248 | 69347112  | 69348370  | 69365129  | 6936541  |
| 131 NA12740 | [2515685 chr4 | 4 | 69672033  | 69693234  | 21202  | 22  | 0.294244  | 0.018346 | 69671975  | 69672092  | 69692988  | 6969348  |
| 132 NA12740 | [2515685 chr4 | 4 | 69699752  | 69717280  | 17529  | 24  | 0.294244  | 0.018346 | 69699123  | 69700381  | 69717139  | 6971742  |
| 133 NA12740 | [2515685 chr4 | 4 | 70328730  | 70416062  | 87333  | 86  | 0.517996  | 0.016593 | 70328526  | 70328934  | 70415760  | 7041636  |
| 134 NA12740 | [2515685 chr4 | 4 | 92343585  | 92344675  | 1091   | 2   | -0.802712 | 0.127044 | 92343246  | 92343924  | 92344415  | 9234493  |
| 135 NA12740 | [2515685 chr4 | 4 | 117921301 | 117926615 | 5315   | 4   | -0.372377 | 0.069482 | 117920899 | 117921704 | 117926216 | 11792701 |
| 136 NA12740 | [2515685 chr4 | 4 | 132301988 | 132715246 | 413259 | 443 | 0.578018  | 0.007005 | 132301598 | 132302379 | 132712177 | 13272057 |
| 137 NA12740 | [2515685 chr4 | 4 | 133002078 | 133043320 | 41243  | 22  | -0.305635 | 0.02558  | 133001890 | 133002267 | 133042031 | 13304460 |
| 138 NA12740 | [2515685 chr4 | 4 | 133328951 | 133330351 | 1601   | 2   | -0.62141  | 0.121895 | 133328344 | 133329558 | 133330282 | 13333082 |
| 139 NA12740 | [2515685 chr4 | 4 | 138537751 | 138549906 | 12156  | 14  | 0.919952  | 0.045278 | 138537443 | 138538059 | 138547414 | 13855239 |
| 140 NA12740 | [2515685 chr4 | 4 | 145241837 | 145245588 | 3752   | 3   | -0.750962 | 0.104089 | 145241488 | 145242187 | 145245192 | 14524598 |

|             |               |   |           |           |        |     |           |          |           |           |           |          |
|-------------|---------------|---|-----------|-----------|--------|-----|-----------|----------|-----------|-----------|-----------|----------|
| 141 NA12740 | [2515685 chr4 | 4 | 153165782 | 153167368 | 1587   | 2   | -0.676103 | 0.120791 | 153165270 | 153166294 | 153167278 | 15316745 |
| 142 NA12740 | [2515685 chr4 | 4 | 162185314 | 162186247 | 934    | 2   | 0.646687  | 0.128517 | 162185095 | 162185534 | 162186003 | 16218649 |
| 143 NA12740 | [2515685 chr4 | 4 | 162238360 | 162242562 | 4203   | 7   | 1.144838  | 0.057977 | 162238058 | 162238662 | 162242381 | 16224274 |
| 144 NA12740 | [2515685 chr4 | 4 | 162551560 | 162562157 | 10598  | 14  | -0.834805 | 0.045306 | 162551137 | 162551983 | 162561329 | 16256298 |
| 145 NA12740 | [2515685 chr4 | 4 | 169183401 | 169368370 | 184970 | 163 | 0.823603  | 0.012259 | 169182712 | 169184090 | 169366713 | 16937002 |
| 146 NA12740 | [2515685 chr4 | 4 | 185533276 | 185534552 | 1277   | 2   | 0.901877  | 0.133038 | 185532696 | 185533857 | 185534150 | 18553495 |
| 147 NA12740 | [2515685 chr4 | 4 | 185535274 | 185544849 | 9576   | 9   | 0.989972  | 0.052557 | 185534955 | 185535593 | 185543276 | 18554642 |
| 148 NA12740 | [2515685 chr4 | 4 | 187728494 | 187732907 | 4414   | 15  | 2.174873  | 0.054329 | 187728193 | 187728795 | 187732541 | 18773327 |
| 149 NA12740 | [2515685 chr4 | 4 | 188255523 | 188269680 | 14158  | 235 | 0.330742  | 0.008779 | 188255215 | 188255831 | 188269403 | 18826995 |
| 150 NA12740 | [2515685 chr4 | 4 | 189770846 | 189777511 | 6666   | 6   | -0.310525 | 0.060364 | 189770482 | 189771211 | 189777107 | 18977791 |
| 151 NA12740 | [2515685 chr4 | 4 | 189812041 | 189814133 | 2093   | 2   | -0.962763 | 0.131716 | 189811777 | 189812306 | 189813742 | 18981452 |
| 152 NA12740 | [2515685 chr4 | 4 | 190528602 | 190533163 | 4562   | 21  | -2.830167 | 0.049677 | 190528058 | 190529146 | 190531664 | 19053466 |
| 153 NA12740 | [2515685 chr4 | 4 | 190941429 | 190949181 | 7753   | 10  | 0.379343  | 0.044428 | 190941038 | 190941820 | 190948972 | 19094939 |
| 154 NA12740 | [2515685 chr4 | 4 | 190993324 | 190997373 | 4050   | 7   | 0.391401  | 0.054953 | 190992967 | 190993681 | 190997254 | 19099749 |
| 155 NA12740 | [2515685 chr5 | 5 | 318840    | 321498    | 2659   | 3   | -0.630406 | 0.089175 | 318400    | 319280    | 321104    | 321895   |
| 156 NA12740 | [2515685 chr5 | 5 | 731749    | 899786    | 168038 | 153 | -0.279947 | 0.011396 | 731185    | 732314    | 899494    | 900078   |
| 157 NA12740 | [2515685 chr5 | 5 | 948969    | 953016    | 4048   | 13  | 0.295666  | 0.032835 | 948182    | 949756    | 952851    | 953182   |
| 158 NA12740 | [2515685 chr5 | 5 | 1075284   | 1079920   | 4637   | 24  | 0.267783  | 0.027062 | 1074709   | 1075859   | 1079566   | 108027   |
| 159 NA12740 | [2515685 chr5 | 5 | 1122439   | 1126517   | 4079   | 39  | -0.257218 | 0.020315 | 1122106   | 1122772   | 1126389   | 112664   |
| 160 NA12740 | [2515685 chr5 | 5 | 1231558   | 1233247   | 1690   | 2   | -0.92434  | 0.096871 | 1231167   | 1231949   | 1232879   | 123361   |
| 161 NA12740 | [2515685 chr5 | 5 | 1624420   | 1686131   | 61712  | 21  | -0.262756 | 0.031855 | 1597428   | 1627616   | 1685890   | 168637   |
| 162 NA12740 | [2515685 chr5 | 5 | 12863961  | 12873512  | 9552   | 14  | -0.847493 | 0.044646 | 12863778  | 12864144  | 12873198  | 1287382  |
| 163 NA12740 | [2515685 chr5 | 5 | 17570241  | 17643104  | 72864  | 332 | -0.404843 | 0.005884 | 17569932  | 17570551  | 17642455  | 1764375  |
| 164 NA12740 | [2515685 chr5 | 5 | 17683634  | 17834666  | 151033 | 148 | -0.404843 | 0.005884 | 17683042  | 17684227  | 17834235  | 1783509  |
| 165 NA12740 | [2515685 chr5 | 5 | 21308420  | 21398924  | 90505  | 143 | 0.311352  | 0.011193 | 21307943  | 21308898  | 21398116  | 2139973  |
| 166 NA12740 | [2515685 chr5 | 5 | 21513408  | 21533400  | 19993  | 44  | -0.562146 | 0.020309 | 21513105  | 21513711  | 21533107  | 2153369  |
| 167 NA12740 | [2515685 chr5 | 5 | 21970848  | 21975387  | 4540   | 9   | 0.360414  | 0.041813 | 21970438  | 21971258  | 21975163  | 2197561  |
| 168 NA12740 | [2515685 chr5 | 5 | 22161042  | 22166561  | 5520   | 7   | 0.329047  | 0.05968  | 22160580  | 22161504  | 22166502  | 2216662  |
| 169 NA12740 | [2515685 chr5 | 5 | 26829433  | 26837938  | 8506   | 7   | 0.791434  | 0.065204 | 26829009  | 26829858  | 26837469  | 2683840  |
| 170 NA12740 | [2515685 chr5 | 5 | 32347584  | 32349795  | 2212   | 2   | 0.766377  | 0.123413 | 32347179  | 32347990  | 32349254  | 3235033  |
| 171 NA12740 | [2515685 chr5 | 5 | 34214373  | 34232271  | 17899  | 44  | -0.535713 | 0.020575 | 34214196  | 34214550  | 34231243  | 3423330  |
| 172 NA12740 | [2515685 chr5 | 5 | 34281414  | 34289385  | 7972   | 21  | 0.360491  | 0.02918  | 34281362  | 34281466  | 34289301  | 3428946  |
| 173 NA12740 | [2515685 chr5 | 5 | 68865200  | 68949968  | 84769  | 157 | 0.514739  | 0.011228 | 68864770  | 68865630  | 68949758  | 6895017  |
| 174 NA12740 | [2515685 chr5 | 5 | 68961866  | 68989673  | 27808  | 69  | -0.580084 | 0.015504 | 68960721  | 68963012  | 68989493  | 6898985  |
| 175 NA12740 | [2515685 chr5 | 5 | 69045001  | 69175474  | 130474 | 320 | 0.39405   | 0.006956 | 69044855  | 69045147  | 69175422  | 6917552  |
| 176 NA12740 | [2515685 chr5 | 5 | 69226683  | 69247838  | 21156  | 53  | -0.576438 | 0.017777 | 69226508  | 69226858  | 69247660  | 6924801  |
| 177 NA12740 | [2515685 chr5 | 5 | 69358940  | 69364794  | 5855   | 8   | 0.442544  | 0.050296 | 69358540  | 69359340  | 69364376  | 6936521  |
| 178 NA12740 | [2515685 chr5 | 5 | 69388384  | 69404835  | 16452  | 21  | 0.379333  | 0.025796 | 69386439  | 69390329  | 69404157  | 6940551  |
| 179 NA12740 | [2515685 chr5 | 5 | 69404835  | 69411352  | 6518   | 6   | 0.905055  | 0.051018 | 69404157  | 69405513  | 69410702  | 6941200  |
| 180 NA12740 | [2515685 chr5 | 5 | 69443029  | 69461372  | 18344  | 31  | 0.307488  | 0.022108 | 69442701  | 69443358  | 69461108  | 6946163  |
| 181 NA12740 | [2515685 chr5 | 5 | 69533449  | 69569414  | 35966  | 91  | -0.593032 | 0.013342 | 69533271  | 69533627  | 69569234  | 6956959  |
| 182 NA12740 | [2515685 chr5 | 5 | 69624725  | 69817505  | 192781 | 391 | 0.391114  | 0.006409 | 69624579  | 69624871  | 69816360  | 6981865  |
| 183 NA12740 | [2515685 chr5 | 5 | 69817505  | 69865798  | 48294  | 120 | -0.587208 | 0.011844 | 69816360  | 69818651  | 69865618  | 6986597  |
| 184 NA12740 | [2515685 chr5 | 5 | 69918221  | 70048545  | 130325 | 301 | 0.383176  | 0.007135 | 69918169  | 69918273  | 70048399  | 7004869  |
| 185 NA12740 | [2515685 chr5 | 5 | 70102565  | 70122889  | 20325  | 51  | -0.578379 | 0.018005 | 70102390  | 70102740  | 70122711  | 7012306  |
| 186 NA12740 | [2515685 chr5 | 5 | 70234358  | 70280260  | 45903  | 45  | 0.337249  | 0.018633 | 70233958  | 70234758  | 70279582  | 7028093  |
| 187 NA12740 | [2515685 chr5 | 5 | 70280260  | 70286789  | 6530   | 6   | 0.882269  | 0.05058  | 70279582  | 70280938  | 70286122  | 7028745  |
| 188 NA12740 | [2515685 chr5 | 5 | 70318496  | 70340791  | 22296  | 37  | 0.324002  | 0.020505 | 70318168  | 70318825  | 70340046  | 7034153  |
| 189 NA12740 | [2515685 chr5 | 5 | 70346980  | 70426554  | 79575  | 137 | 0.529612  | 0.012164 | 70346969  | 70346991  | 70425419  | 7042768  |
| 190 NA12740 | [2515685 chr5 | 5 | 70443382  | 70461691  | 18310  | 30  | 0.312142  | 0.02252  | 70443054  | 70443711  | 70461427  | 7046195  |
| 191 NA12740 | [2515685 chr5 | 5 | 70533834  | 70569756  | 35923  | 90  | -0.604194 | 0.013499 | 70533656  | 70534012  | 70569576  | 7056993  |
| 192 NA12740 | [2515685 chr5 | 5 | 70580346  | 70696754  | 116409 | 255 | 0.317963  | 0.007756 | 70579879  | 70580814  | 70696498  | 7069701  |
| 193 NA12740 | [2515685 chr5 | 5 | 81459209  | 81466059  | 6851   | 2   | -1.502706 | 0.121843 | 81455614  | 81462405  | 81462863  | 8147028  |
| 194 NA12740 | [2515685 chr5 | 5 | 93928460  | 93933101  | 4642   | 4   | -0.411178 | 0.080976 | 93927706  | 93929215  | 93931984  | 9393421  |
| 195 NA12740 | [2515685 chr5 | 5 | 97427204  | 97428353  | 1150   | 2   | -4.302    | 0.257329 | 97426913  | 97427496  | 97428177  | 9742852  |

|             |               |   |           |           |       |    |           |          |           |           |           |          |
|-------------|---------------|---|-----------|-----------|-------|----|-----------|----------|-----------|-----------|-----------|----------|
| 196 NA12740 | [2515685 chr5 | 5 | 98882118  | 98900556  | 18439 | 35 | -0.473695 | 0.024321 | 98881808  | 98882429  | 98900309  | 9890080: |
| 197 NA12740 | [2515685 chr5 | 5 | 99409393  | 99419037  | 9645  | 13 | -0.437293 | 0.023121 | 99408997  | 99409789  | 99418328  | 9941974: |
| 198 NA12740 | [2515685 chr5 | 5 | 99423979  | 99436061  | 12083 | 19 | -0.437293 | 0.023121 | 99423701  | 99424257  | 99433487  | 9943863: |
| 199 NA12740 | [2515685 chr5 | 5 | 99738581  | 99756720  | 18140 | 38 | -0.443507 | 0.023168 | 99738184  | 99738978  | 99756474  | 9975696: |
| 200 NA12740 | [2515685 chr5 | 5 | 122649189 | 122651412 | 2224  | 3  | 0.491415  | 0.089985 | 122648933 | 122649446 | 122650032 | 12265279 |
| 201 NA12740 | [2515685 chr5 | 5 | 137835848 | 137844134 | 8287  | 7  | 0.688036  | 0.061504 | 137835611 | 137836085 | 137843310 | 13784495 |
| 202 NA12740 | [2515685 chr5 | 5 | 140203081 | 140218928 | 15848 | 20 | 2.090782  | 0.051782 | 140202344 | 140203819 | 140218508 | 14021934 |
| 203 NA12740 | [2515685 chr5 | 5 | 165157996 | 165161604 | 3609  | 2  | -0.787273 | 0.122498 | 165155280 | 165160712 | 165160802 | 16516240 |
| 204 NA12740 | [2515685 chr5 | 5 | 175391058 | 175393797 | 2740  | 8  | -0.328292 | 0.057346 | 175390888 | 175391228 | 175393522 | 17539407 |
| 205 NA12740 | [2515685 chr5 | 5 | 180108385 | 180119119 | 10735 | 8  | 0.599762  | 0.054549 | 180108099 | 180108671 | 180115923 | 18013530 |
| 206 NA12740 | [2515685 chr5 | 5 | 180275137 | 180280231 | 5095  | 5  | 0.542646  | 0.074303 | 180273651 | 180276623 | 180277035 | 18028376 |
| 207 NA12740 | [2515685 chr5 | 5 | 180418059 | 180419113 | 1055  | 2  | 0.810425  | 0.131438 | 180417894 | 180418224 | 180418598 | 18041962 |
| 208 NA12740 | [2515685 chr6 | 6 | 201823    | 233994    | 32172 | 22 | -0.518512 | 0.031622 | 201415    | 202232    | 233746    | 234242   |
| 209 NA12740 | [2515685 chr6 | 6 | 237270    | 240929    | 3660  | 3  | -0.482209 | 0.088032 | 236563    | 237978    | 240278    | 241581   |
| 210 NA12740 | [2515685 chr6 | 6 | 26959328  | 26977341  | 18014 | 39 | -0.523247 | 0.022255 | 26958921  | 26959735  | 26976872  | 2697781  |
| 211 NA12740 | [2515685 chr6 | 6 | 27035412  | 27041952  | 6541  | 14 | 0.366322  | 0.035863 | 27034986  | 27035839  | 27041040  | 2704286  |
| 212 NA12740 | [2515685 chr6 | 6 | 29954251  | 30011802  | 57552 | 51 | 0.53574   | 0.021693 | 29950833  | 29957670  | 30011083  | 3001252  |
| 213 NA12740 | [2515685 chr6 | 6 | 30025806  | 30028127  | 2322  | 3  | 0.506737  | 0.085709 | 30025409  | 30026203  | 30027297  | 3002895  |
| 214 NA12740 | [2515685 chr6 | 6 | 32056378  | 32121527  | 65150 | 80 | -0.282416 | 0.014313 | 32056113  | 32056644  | 32121053  | 3212200  |
| 215 NA12740 | [2515685 chr6 | 6 | 32538780  | 32544819  | 6040  | 3  | -0.555848 | 0.092951 | 32538477  | 32539084  | 32543082  | 3254655  |
| 216 NA12740 | [2515685 chr6 | 6 | 32565102  | 32586862  | 21761 | 3  | -0.996732 | 0.145121 | 32564888  | 32565316  | 32586127  | 3258759  |
| 217 NA12740 | [2515685 chr6 | 6 | 32589957  | 32591649  | 1693  | 3  | -0.624034 | 0.093007 | 32589338  | 32590576  | 32591403  | 3259189  |
| 218 NA12740 | [2515685 chr6 | 6 | 32605125  | 32605958  | 834   | 2  | -0.926766 | 0.116494 | 32604923  | 32605328  | 32605760  | 3260615  |
| 219 NA12740 | [2515685 chr6 | 6 | 32653862  | 32655482  | 1621  | 3  | 0.995208  | 0.128386 | 32653679  | 32654046  | 32654980  | 3265598  |
| 220 NA12740 | [2515685 chr6 | 6 | 32666229  | 32667673  | 1445  | 3  | 0.73603   | 0.08354  | 32665899  | 32666560  | 32667507  | 3266783  |
| 221 NA12740 | [2515685 chr6 | 6 | 32678696  | 32680751  | 2056  | 3  | 0.579843  | 0.092045 | 32678507  | 32678885  | 32680547  | 3268095  |
| 222 NA12740 | [2515685 chr6 | 6 | 32702716  | 32705737  | 3022  | 3  | -0.462648 | 0.076016 | 32702285  | 32703148  | 32704019  | 3270745  |
| 223 NA12740 | [2515685 chr6 | 6 | 32737263  | 32760803  | 23541 | 18 | 0.340294  | 0.036657 | 32737093  | 32737434  | 32760588  | 3276101  |
| 224 NA12740 | [2515685 chr6 | 6 | 32799020  | 32809789  | 10770 | 12 | 0.387013  | 0.044881 | 32798752  | 32799289  | 32808807  | 3281077  |
| 225 NA12740 | [2515685 chr6 | 6 | 58358886  | 58376078  | 17193 | 34 | -0.534079 | 0.023366 | 58358525  | 58359247  | 58375178  | 5837697  |
| 226 NA12740 | [2515685 chr6 | 6 | 74648985  | 74658753  | 9769  | 11 | -0.795504 | 0.047034 | 74648748  | 74649222  | 74655247  | 7466226  |
| 227 NA12740 | [2515685 chr6 | 6 | 77495034  | 77513517  | 18484 | 12 | 0.777031  | 0.046733 | 77493568  | 77496500  | 77510011  | 7751769  |
| 228 NA12740 | [2515685 chr6 | 6 | 79023318  | 79093263  | 69946 | 70 | 0.835948  | 0.01877  | 79022028  | 79024609  | 79091909  | 7909461  |
| 229 NA12740 | [2515685 chr6 | 6 | 79135546  | 79136806  | 1261  | 3  | -0.475416 | 0.083072 | 79135298  | 79135795  | 79136434  | 7913717  |
| 230 NA12740 | [2515685 chr6 | 6 | 87619300  | 87627777  | 8478  | 7  | -0.921065 | 0.057609 | 87619165  | 87619436  | 87624271  | 8764283  |
| 231 NA12740 | [2515685 chr6 | 6 | 115492959 | 115494541 | 1583  | 2  | 0.742063  | 0.123756 | 115492678 | 115493240 | 115494140 | 11549494 |
| 232 NA12740 | [2515685 chr6 | 6 | 120671191 | 120671916 | 726   | 2  | 1.226163  | 0.11553  | 120670696 | 120671686 | 120671725 | 12067210 |
| 233 NA12740 | [2515685 chr6 | 6 | 168780035 | 168781989 | 1955  | 4  | 0.532355  | 0.070601 | 168779504 | 168780567 | 168781555 | 16878242 |
| 234 NA12740 | [2515685 chr6 | 6 | 170625506 | 170627028 | 1523  | 3  | 1.367336  | 0.105789 | 170625015 | 170625997 | 170626579 | 17062747 |
| 235 NA12740 | [2515685 chr7 | 7 | 168267    | 175565    | 7299  | 13 | 0.325973  | 0.041247 | 167622    | 168913    | 175292    | 175838   |
| 236 NA12740 | [2515685 chr7 | 7 | 3384111   | 3392461   | 8351  | 8  | 0.925851  | 0.057417 | 3383451   | 3384772   | 3390107   | 339561   |
| 237 NA12740 | [2515685 chr7 | 7 | 9015342   | 9016892   | 1551  | 2  | -0.564427 | 0.106812 | 9014883   | 9015802   | 9016671   | 901711   |
| 238 NA12740 | [2515685 chr7 | 7 | 16871291  | 16874144  | 2854  | 4  | 0.39851   | 0.074983 | 16871031  | 16871551  | 16873563  | 1687472  |
| 239 NA12740 | [2515685 chr7 | 7 | 29443211  | 29460360  | 17150 | 7  | -0.396991 | 0.054803 | 29442384  | 29444038  | 29459286  | 2946143  |
| 240 NA12740 | [2515685 chr7 | 7 | 29556260  | 29560204  | 3945  | 3  | 0.421769  | 0.078221 | 29555543  | 29556978  | 29559800  | 2956060  |
| 241 NA12740 | [2515685 chr7 | 7 | 62001291  | 62001715  | 425   | 2  | -0.481822 | 0.093882 | 62001204  | 62001378  | 62001559  | 6200187  |
| 242 NA12740 | [2515685 chr7 | 7 | 62254472  | 62255088  | 617   | 4  | 0.852669  | 0.076284 | 62254309  | 62254635  | 62254924  | 6225525  |
| 243 NA12740 | [2515685 chr7 | 7 | 62302079  | 62302696  | 618   | 4  | 0.852685  | 0.076285 | 62301915  | 62302243  | 62302533  | 6230285  |
| 244 NA12740 | [2515685 chr7 | 7 | 64028200  | 64046357  | 18158 | 49 | -0.301574 | 0.020207 | 64027276  | 64029125  | 64046143  | 6404657  |
| 245 NA12740 | [2515685 chr7 | 7 | 64162316  | 64165371  | 3056  | 2  | 0.699782  | 0.136102 | 64160143  | 64164489  | 64165089  | 6416565  |
| 246 NA12740 | [2515685 chr7 | 7 | 64464087  | 64480934  | 16848 | 45 | -0.303535 | 0.021138 | 64463669  | 64464506  | 64480451  | 6448141  |
| 247 NA12740 | [2515685 chr7 | 7 | 64539824  | 64556662  | 16839 | 47 | -0.289381 | 0.020394 | 64539348  | 64540300  | 64556244  | 6455708  |
| 248 NA12740 | [2515685 chr7 | 7 | 69866390  | 69869623  | 3234  | 4  | 0.573493  | 0.08225  | 69865412  | 69867368  | 69869269  | 6986997  |
| 249 NA12740 | [2515685 chr7 | 7 | 69869623  | 69871056  | 1434  | 2  | 3.187345  | 0.174929 | 69869269  | 69869978  | 69870420  | 6987169  |
| 250 NA12740 | [2515685 chr7 | 7 | 72014016  | 72014871  | 856   | 3  | 1.027289  | 0.078305 | 72013991  | 72014042  | 72014598  | 7201514  |

|             |               |   |           |           |        |     |           |          |           |           |           |           |
|-------------|---------------|---|-----------|-----------|--------|-----|-----------|----------|-----------|-----------|-----------|-----------|
| 251 NA12740 | [2515685 chr7 | 7 | 73823778  | 73824413  | 636    | 3   | 0.99455   | 0.083411 | 73823755  | 73823801  | 73824363  | 7382446:  |
| 252 NA12740 | [2515685 chr7 | 7 | 74096901  | 74097754  | 854    | 3   | 1.027289  | 0.078305 | 74096630  | 74097173  | 74097729  | 7409778(  |
| 253 NA12740 | [2515685 chr7 | 7 | 74511185  | 74511943  | 759    | 3   | 1.027301  | 0.078306 | 74511009  | 74511362  | 74511918  | 7451196!  |
| 254 NA12740 | [2515685 chr7 | 7 | 92971481  | 92976895  | 5415   | 4   | 0.725026  | 0.086533 | 92971060  | 92971903  | 92975569  | 9297822   |
| 255 NA12740 | [2515685 chr7 | 7 | 99513362  | 99513912  | 551    | 2   | 0.946377  | 0.095407 | 99513133  | 99513592  | 99513623  | 9951420;  |
| 256 NA12740 | [2515685 chr7 | 7 | 100202927 | 100203955 | 1029   | 2   | 0.780727  | 0.112054 | 100202569 | 100203285 | 100203714 | 10020419  |
| 257 NA12740 | [2515685 chr7 | 7 | 101728177 | 101743585 | 15409  | 17  | 0.364421  | 0.032341 | 101727922 | 101728433 | 101743499 | 10174367  |
| 258 NA12740 | [2515685 chr7 | 7 | 101744567 | 101746499 | 1933   | 2   | 0.676006  | 0.082167 | 101744010 | 101745124 | 101745864 | 10174713  |
| 259 NA12740 | [2515685 chr7 | 7 | 101750729 | 101759251 | 8523   | 11  | 0.560971  | 0.036771 | 101750058 | 101751400 | 101759229 | 10175927  |
| 260 NA12740 | [2515685 chr7 | 7 | 101768898 | 101770034 | 1137   | 2   | 0.571885  | 0.082167 | 101768621 | 101769176 | 101769652 | 10177041  |
| 261 NA12740 | [2515685 chr7 | 7 | 101778283 | 101784928 | 6646   | 8   | 0.334319  | 0.047142 | 101777850 | 101778717 | 101784747 | 10178511  |
| 262 NA12740 | [2515685 chr7 | 7 | 101827410 | 101842805 | 15396  | 18  | 0.354092  | 0.031052 | 101827155 | 101827666 | 101842719 | 10184289  |
| 263 NA12740 | [2515685 chr7 | 7 | 101843787 | 101845706 | 1920   | 2   | 0.676007  | 0.082167 | 101843230 | 101844344 | 101845083 | 10184632  |
| 264 NA12740 | [2515685 chr7 | 7 | 101849923 | 101858816 | 8894   | 11  | 0.56097   | 0.036771 | 101849252 | 101850594 | 101858540 | 10185909  |
| 265 NA12740 | [2515685 chr7 | 7 | 101868236 | 101869373 | 1138   | 2   | 0.571885  | 0.082167 | 101867960 | 101868513 | 101868990 | 10186975  |
| 266 NA12740 | [2515685 chr7 | 7 | 101879030 | 101884158 | 5129   | 7   | 0.353236  | 0.051405 | 101878111 | 101879950 | 101883977 | 10188434  |
| 267 NA12740 | [2515685 chr7 | 7 | 109034780 | 109048749 | 13970  | 10  | 1.742408  | 0.069088 | 109024063 | 109037134 | 109046953 | 10905054  |
| 268 NA12740 | [2515685 chr7 | 7 | 125264357 | 125270808 | 6452   | 8   | 0.299835  | 0.057102 | 125263601 | 125265113 | 125270438 | 12527117  |
| 269 NA12740 | [2515685 chr7 | 7 | 125639507 | 125644775 | 5269   | 6   | -0.821823 | 0.07232  | 125639054 | 125639961 | 125644046 | 12564550  |
| 270 NA12740 | [2515685 chr7 | 7 | 141193689 | 141199500 | 5812   | 3   | -0.477564 | 0.090855 | 141193249 | 141194130 | 141199191 | 14119981  |
| 271 NA12740 | [2515685 chr7 | 7 | 141218636 | 141247657 | 29022  | 30  | -0.737999 | 0.029653 | 141217990 | 141219282 | 141247027 | 14124828  |
| 272 NA12740 | [2515685 chr7 | 7 | 141503396 | 141521690 | 18295  | 23  | 0.648346  | 0.032008 | 141503029 | 141503763 | 141521412 | 14152196  |
| 273 NA12740 | [2515685 chr7 | 7 | 141523339 | 141526577 | 3239   | 6   | 0.279277  | 0.053877 | 141523297 | 141523382 | 141526109 | 14152704  |
| 274 NA12740 | [2515685 chr7 | 7 | 141960848 | 141993247 | 32400  | 38  | -0.309705 | 0.023394 | 141960004 | 141961693 | 141992651 | 14199384  |
| 275 NA12740 | [2515685 chr7 | 7 | 155885650 | 155893882 | 8233   | 6   | -0.543427 | 0.059649 | 155885314 | 155885986 | 155893433 | 15589433  |
| 276 NA12740 | [2515685 chr7 | 7 | 156976112 | 156978464 | 2353   | 2   | 0.978755  | 0.106511 | 156975812 | 156976413 | 156977896 | 15697903  |
| 277 NA12740 | [2515685 chr7 | 7 | 158617060 | 158624382 | 7323   | 6   | 0.767825  | 0.067083 | 158616763 | 158617357 | 158622028 | 15862673  |
| 278 NA12740 | [2515685 chr8 | 8 | 314016    | 317019    | 3004   | 5   | 0.678146  | 0.064343 | 313588    | 314445    | 316753    | 317286    |
| 279 NA12740 | [2515685 chr8 | 8 | 345497    | 346644    | 1148   | 3   | 0.769183  | 0.086427 | 345046    | 345949    | 346440    | 346848    |
| 280 NA12740 | [2515685 chr8 | 8 | 1328256   | 1343509   | 15254  | 45  | -0.391081 | 0.019363 | 1327688   | 1328824   | 1342795   | 1344224   |
| 281 NA12740 | [2515685 chr8 | 8 | 2238729   | 2253798   | 15070  | 10  | 0.786348  | 0.0499   | 2233839   | 2241488   | 2251039   | 2257526   |
| 282 NA12740 | [2515685 chr8 | 8 | 3773583   | 3778609   | 5027   | 7   | -1.03555  | 0.060964 | 3773236   | 3773931   | 3778103   | 377911!   |
| 283 NA12740 | [2515685 chr8 | 8 | 4110204   | 4112526   | 2323   | 2   | 3.474937  | 0.236615 | 4109692   | 4110717   | 4112031   | 411302!   |
| 284 NA12740 | [2515685 chr8 | 8 | 4829987   | 4834056   | 4070   | 5   | 0.356223  | 0.067926 | 4829088   | 4830887   | 4833623   | 483448!   |
| 285 NA12740 | [2515685 chr8 | 8 | 5484522   | 5486139   | 1618   | 2   | -0.560466 | 0.095496 | 5484021   | 5485024   | 5485750   | 548652!   |
| 286 NA12740 | [2515685 chr8 | 8 | 7099626   | 7140759   | 41134  | 183 | 0.290713  | 0.00919  | 7099463   | 7099790   | 7140745   | 714077!   |
| 287 NA12740 | [2515685 chr8 | 8 | 7177227   | 7187896   | 10670  | 29  | 0.415679  | 0.027875 | 7177183   | 7177271   | 7187590   | 718820!   |
| 288 NA12740 | [2515685 chr8 | 8 | 7396178   | 7429912   | 33735  | 143 | 0.2889    | 0.010376 | 7396165   | 7396192   | 7429678   | 743014!   |
| 289 NA12740 | [2515685 chr8 | 8 | 7608166   | 7664722   | 56557  | 255 | 0.28707   | 0.007761 | 7608003   | 7608330   | 7664708   | 766473!   |
| 290 NA12740 | [2515685 chr8 | 8 | 7861835   | 7928723   | 66889  | 186 | 0.259818  | 0.009827 | 7861646   | 7862024   | 7928292   | 7929154   |
| 291 NA12740 | [2515685 chr8 | 8 | 12023188  | 12034819  | 11632  | 30  | 0.395642  | 0.027604 | 12022997  | 12023380  | 12034665  | 1203497!  |
| 292 NA12740 | [2515685 chr8 | 8 | 12280221  | 12283346  | 3126   | 5   | 0.498796  | 0.066779 | 12279837  | 12280606  | 12283070  | 1228362!  |
| 293 NA12740 | [2515685 chr8 | 8 | 17671955  | 17673956  | 2002   | 3   | 0.410873  | 0.074815 | 17671619  | 17672291  | 17673575  | 1767433!  |
| 294 NA12740 | [2515685 chr8 | 8 | 18899163  | 18902503  | 3341   | 4   | -0.3702   | 0.071312 | 18898189  | 18900138  | 18902242  | 1890276!  |
| 295 NA12740 | [2515685 chr8 | 8 | 21429139  | 21431852  | 2714   | 2   | -0.686126 | 0.114729 | 21428460  | 21429819  | 21431563  | 2143214   |
| 296 NA12740 | [2515685 chr8 | 8 | 21832667  | 21833967  | 1301   | 2   | 0.843472  | 0.111037 | 21832108  | 21833227  | 21833678  | 2183425!  |
| 297 NA12740 | [2515685 chr8 | 8 | 47642279  | 47661493  | 19215  | 36  | 0.346476  | 0.025397 | 47637780  | 47645038  | 47658734  | 4768811!  |
| 298 NA12740 | [2515685 chr8 | 8 | 49081430  | 49084499  | 3070   | 2   | 1.10544   | 0.12349  | 49079497  | 49083364  | 49084089  | 4908491!  |
| 299 NA12740 | [2515685 chr8 | 8 | 51921944  | 52046277  | 124334 | 126 | 0.489741  | 0.013648 | 51921580  | 51922309  | 52045111  | 5204744   |
| 300 NA12740 | [2515685 chr8 | 8 | 58278355  | 58287850  | 9496   | 8   | 0.864577  | 0.048229 | 58277116  | 58279595  | 58287616  | 5828808!  |
| 301 NA12740 | [2515685 chr8 | 8 | 72377031  | 72380286  | 3256   | 3   | -0.712291 | 0.082798 | 72376214  | 72377848  | 72379847  | 7238072!  |
| 302 NA12740 | [2515685 chr8 | 8 | 85423649  | 85431920  | 8272   | 7   | 0.893769  | 0.059311 | 85423043  | 85424256  | 85431347  | 8543249!  |
| 303 NA12740 | [2515685 chr8 | 8 | 86742169  | 86910255  | 168087 | 105 | 0.694395  | 0.012418 | 86741757  | 86742581  | 86910002  | 8691050!  |
| 304 NA12740 | [2515685 chr8 | 8 | 120222655 | 120229952 | 7298   | 6   | 0.825827  | 0.060679 | 120218251 | 120225414 | 120229434 | 12023047! |
| 305 NA12740 | [2515685 chr8 | 8 | 145530388 | 145532720 | 2333   | 2   | 1.033749  | 0.135477 | 145530166 | 145530611 | 145532494 | 14553294  |

|             |                |    |           |           |        |      |           |          |           |           |           |          |
|-------------|----------------|----|-----------|-----------|--------|------|-----------|----------|-----------|-----------|-----------|----------|
| 306 NA12740 | [2515685 chr9  | 9  | 38856012  | 38864826  | 8815   | 17   | -0.273087 | 0.033798 | 38849975  | 38858379  | 38864539  | 38865111 |
| 307 NA12740 | [2515685 chr9  | 9  | 40730670  | 40734310  | 3641   | 7    | 0.303718  | 0.053401 | 40730592  | 40730749  | 40733280  | 40735347 |
| 308 NA12740 | [2515685 chr9  | 9  | 41234612  | 41243372  | 8761   | 14   | -0.293209 | 0.038336 | 41234325  | 41234900  | 41241005  | 41249461 |
| 309 NA12740 | [2515685 chr9  | 9  | 42026005  | 42029645  | 3641   | 7    | 0.303719  | 0.053401 | 42024974  | 42027036  | 42029567  | 42029721 |
| 310 NA12740 | [2515685 chr9  | 9  | 42537073  | 42537822  | 750    | 2    | -0.451281 | 0.087348 | 42536791  | 42537356  | 42537661  | 42537981 |
| 311 NA12740 | [2515685 chr9  | 9  | 43808781  | 43812530  | 3750   | 5    | 0.411249  | 0.067322 | 43808388  | 43809175  | 43812324  | 43812731 |
| 312 NA12740 | [2515685 chr9  | 9  | 43885522  | 43886459  | 938    | 2    | 0.759877  | 0.101119 | 43885267  | 43885778  | 43886107  | 43886811 |
| 313 NA12740 | [2515685 chr9  | 9  | 43948136  | 43948930  | 795    | 2    | 0.479611  | 0.095049 | 43947942  | 43948331  | 43948412  | 43949441 |
| 314 NA12740 | [2515685 chr9  | 9  | 44363154  | 44382605  | 19452  | 27   | -0.254064 | 0.027969 | 44363111  | 44363197  | 44382484  | 44382721 |
| 315 NA12740 | [2515685 chr9  | 9  | 45400159  | 45417672  | 17514  | 28   | -0.25676  | 0.027083 | 45400038  | 45400280  | 45417629  | 45417711 |
| 316 NA12740 | [2515685 chr9  | 9  | 66047392  | 66055807  | 8416   | 14   | -0.307447 | 0.039566 | 66047340  | 66047445  | 66053440  | 66061901 |
| 317 NA12740 | [2515685 chr9  | 9  | 66694185  | 66706172  | 11988  | 29   | -0.251409 | 0.026212 | 66688817  | 66696552  | 66706129  | 66706211 |
| 318 NA12740 | [2515685 chr9  | 9  | 66818595  | 66825755  | 7161   | 14   | 0.351338  | 0.034356 | 66818349  | 66818841  | 66825546  | 66825961 |
| 319 NA12740 | [2515685 chr9  | 9  | 67058030  | 67060094  | 2065   | 2    | 0.654219  | 0.092153 | 67057871  | 67058189  | 67059821  | 67060361 |
| 320 NA12740 | [2515685 chr9  | 9  | 67195876  | 67196883  | 1008   | 2    | 0.624478  | 0.085846 | 67195691  | 67196062  | 67196717  | 67197041 |
| 321 NA12740 | [2515685 chr9  | 9  | 68200977  | 68201915  | 939    | 2    | 0.847725  | 0.102992 | 68200578  | 68201376  | 68201730  | 68202101 |
| 322 NA12740 | [2515685 chr9  | 9  | 131435119 | 131438910 | 3792   | 3    | 0.527055  | 0.085065 | 131434661 | 131435578 | 131437938 | 13143988 |
| 323 NA12740 | [2515685 chr9  | 9  | 135438414 | 135444067 | 5654   | 2    | 2.57606   | 0.15162  | 135383632 | 135440781 | 135443016 | 13544511 |
| 324 NA12740 | [2515685 chr9  | 9  | 137511582 | 137513701 | 2120   | 13   | 0.259681  | 0.034965 | 137511284 | 137511880 | 137512564 | 13751483 |
| 325 NA12740 | [2515685 chr9  | 9  | 138188003 | 138189923 | 1921   | 45   | 0.354361  | 0.022118 | 138187808 | 138188198 | 138189840 | 13819000 |
| 326 NA12740 | [2515685 chr9  | 9  | 138321120 | 138382492 | 61373  | 51   | 0.303768  | 0.020148 | 138320611 | 138321629 | 138382287 | 13838269 |
| 327 NA12740 | [2515685 chr10 | 10 | 170571    | 172369    | 1799   | 2    | 0.6833    | 0.095691 | 170341    | 170801    | 171237    | 173501   |
| 328 NA12740 | [2515685 chr10 | 10 | 3099589   | 3101985   | 2397   | 2    | 0.59736   | 0.11081  | 3098962   | 3100217   | 3101441   | 3102521  |
| 329 NA12740 | [2515685 chr10 | 10 | 6693908   | 6703893   | 9986   | 8    | 0.803359  | 0.056927 | 6692231   | 6695585   | 6703779   | 6704001  |
| 330 NA12740 | [2515685 chr10 | 10 | 20888192  | 20900121  | 11930  | 9    | -0.802691 | 0.05322  | 20883329  | 20890946  | 20897367  | 20902911 |
| 331 NA12740 | [2515685 chr10 | 10 | 37487278  | 37529195  | 41918  | 64   | -0.426807 | 0.01585  | 37486985  | 37487572  | 37528890  | 37529501 |
| 332 NA12740 | [2515685 chr10 | 10 | 38962270  | 38968766  | 6497   | 7    | -0.310096 | 0.056249 | 38958880  | 38965024  | 38968633  | 38968891 |
| 333 NA12740 | [2515685 chr10 | 10 | 42559247  | 42565662  | 6416   | 10   | -0.455189 | 0.047241 | 42558647  | 42559848  | 42565423  | 42565901 |
| 334 NA12740 | [2515685 chr10 | 10 | 42571870  | 42579457  | 7588   | 10   | -0.272622 | 0.047852 | 42571696  | 42572045  | 42576703  | 42583641 |
| 335 NA12740 | [2515685 chr10 | 10 | 46110964  | 46132737  | 21774  | 38   | -0.338387 | 0.020527 | 46110327  | 46111602  | 46132697  | 46132771 |
| 336 NA12740 | [2515685 chr10 | 10 | 46182692  | 47173707  | 991016 | 1449 | -0.354928 | 0.003531 | 46182549  | 46182836  | 47173507  | 47173901 |
| 337 NA12740 | [2515685 chr10 | 10 | 47219668  | 47237545  | 17878  | 58   | -0.33701  | 0.017271 | 47219445  | 47219892  | 47237269  | 47237821 |
| 338 NA12740 | [2515685 chr10 | 10 | 47723228  | 47808451  | 85224  | 240  | -0.341256 | 0.008675 | 47751187  | 47725982  | 47808334  | 47808561 |
| 339 NA12740 | [2515685 chr10 | 10 | 47881201  | 47895873  | 14673  | 42   | -0.357537 | 0.019764 | 47881184  | 47881219  | 47895597  | 47896141 |
| 340 NA12740 | [2515685 chr10 | 10 | 48574881  | 48718251  | 143371 | 277  | -0.351155 | 0.00758  | 48574098  | 48575665  | 48715497  | 48865561 |
| 341 NA12740 | [2515685 chr10 | 10 | 51116611  | 51132375  | 15765  | 21   | -0.340513 | 0.029113 | 51067634  | 51119365  | 51132368  | 51132381 |
| 342 NA12740 | [2515685 chr10 | 10 | 55592752  | 55692636  | 99885  | 6    | -0.30018  | 0.053707 | 55473112  | 55595506  | 55692619  | 55692651 |
| 343 NA12740 | [2515685 chr10 | 10 | 58879708  | 58882015  | 2308   | 5    | -0.95639  | 0.080042 | 58879568  | 58879849  | 58881863  | 58882161 |
| 344 NA12740 | [2515685 chr10 | 10 | 63379419  | 63985517  | 606099 | 6    | 0.350399  | 0.058266 | 63326563  | 63382173  | 63982763  | 64101291 |
| 345 NA12740 | [2515685 chr10 | 10 | 66977355  | 66985193  | 7839   | 8    | -0.791296 | 0.06008  | 66976803  | 66977908  | 66984894  | 66985491 |
| 346 NA12740 | [2515685 chr10 | 10 | 81130280  | 81131239  | 960    | 2    | 0.634794  | 0.095934 | 81129619  | 81130942  | 81131087  | 81131391 |
| 347 NA12740 | [2515685 chr10 | 10 | 81450479  | 81451438  | 960    | 2    | 0.634794  | 0.095934 | 81449818  | 81451141  | 81451286  | 81451591 |
| 348 NA12740 | [2515685 chr10 | 10 | 81588178  | 81589341  | 1164   | 2    | 0.634783  | 0.096004 | 81587312  | 81589044  | 81589190  | 81589491 |
| 349 NA12740 | [2515685 chr10 | 10 | 88866216  | 88963891  | 97676  | 108  | -0.353416 | 0.013245 | 88865617  | 88866816  | 88963564  | 88964211 |
| 350 NA12740 | [2515685 chr10 | 10 | 88972479  | 88973430  | 952    | 2    | 0.6348    | 0.095934 | 88971824  | 88973135  | 88973280  | 88973581 |
| 351 NA12740 | [2515685 chr10 | 10 | 89104443  | 89105652  | 1210   | 2    | 0.6348    | 0.095934 | 89103532  | 89105355  | 89105500  | 89105801 |
| 352 NA12740 | [2515685 chr10 | 10 | 89138419  | 89179870  | 41452  | 70   | -0.262938 | 0.016563 | 89137950  | 89138889  | 89179587  | 89180151 |
| 353 NA12740 | [2515685 chr10 | 10 | 114102241 | 114106477 | 4237   | 5    | 1.042357  | 0.075601 | 114101694 | 114102788 | 114105867 | 11410708 |
| 354 NA12740 | [2515685 chr10 | 10 | 124336365 | 124341749 | 5385   | 6    | 0.656897  | 0.06606  | 124335581 | 124337149 | 124341238 | 12434226 |
| 355 NA12740 | [2515685 chr10 | 10 | 124350353 | 124366738 | 16386  | 21   | -0.32717  | 0.026682 | 124350031 | 124350675 | 124366300 | 12436717 |
| 356 NA12740 | [2515685 chr10 | 10 | 134924761 | 134926337 | 1577   | 16   | 0.446495  | 0.041541 | 134924706 | 134924816 | 134926184 | 13492649 |
| 357 NA12740 | [2515685 chr10 | 10 | 134932085 | 134935385 | 3301   | 4    | 0.495666  | 0.073972 | 134931752 | 134932419 | 134934910 | 13493586 |
| 358 NA12740 | [2515685 chr10 | 10 | 135344852 | 135347622 | 2771   | 4    | -0.453831 | 0.07664  | 135344662 | 135345042 | 135346747 | 13534849 |
| 359 NA12740 | [2515685 chr10 | 10 | 135365507 | 135367159 | 1653   | 2    | 1.146428  | 0.132047 | 135364999 | 135366016 | 135366656 | 13536766 |
| 360 NA12740 | [2515685 chr11 | 11 | 969654    | 971069    | 1416   | 2    | 1.160896  | 0.115034 | 969333    | 969976    | 970737    | 971401   |



|             |                |    |           |           |         |      |           |          |           |           |           |           |
|-------------|----------------|----|-----------|-----------|---------|------|-----------|----------|-----------|-----------|-----------|-----------|
| 361 NA12740 | [2515685 chr11 | 11 | 2840307   | 2842410   | 2104    | 3    | 1.022504  | 0.099494 | 2839959   | 2840656   | 2841856   | 284296!   |
| 362 NA12740 | [2515685 chr11 | 11 | 3628748   | 3632795   | 4048    | 6    | 0.879756  | 0.064313 | 3625722   | 3631775   | 3632594   | 363299!   |
| 363 NA12740 | [2515685 chr11 | 11 | 4250187   | 4254233   | 4047    | 8    | 0.392143  | 0.053271 | 4249932   | 4250443   | 4253424   | 425504!   |
| 364 NA12740 | [2515685 chr11 | 11 | 4268170   | 4272208   | 4039    | 9    | 0.461348  | 0.048863 | 4267355   | 4268986   | 4271953   | 427246!   |
| 365 NA12740 | [2515685 chr11 | 11 | 4319331   | 4323607   | 4277    | 11   | 0.46546   | 0.043686 | 4318517   | 4320146   | 4323475   | 432373!   |
| 366 NA12740 | [2515685 chr11 | 11 | 4924831   | 4932599   | 7769    | 8    | -3.111174 | 0.092382 | 4924403   | 4925260   | 4931948   | 493325!   |
| 367 NA12740 | [2515685 chr11 | 11 | 5717038   | 5722029   | 4992    | 3    | 2.380512  | 0.135674 | 5716660   | 5717416   | 5718945   | 572548!   |
| 368 NA12740 | [2515685 chr11 | 11 | 5756185   | 5765093   | 8909    | 13   | -0.385345 | 0.07251  | 5755934   | 5756436   | 5764555   | 576563!   |
| 369 NA12740 | [2515685 chr11 | 11 | 11831868  | 11833089  | 1222    | 2    | 0.988643  | 0.11618  | 11831412  | 11832324  | 11832853  | 1183332!  |
| 370 NA12740 | [2515685 chr11 | 11 | 18906905  | 18928671  | 21767   | 29   | 0.754459  | 0.02843  | 18906533  | 18907278  | 18928457  | 1892888!  |
| 371 NA12740 | [2515685 chr11 | 11 | 28965605  | 28969186  | 3582    | 5    | 3.365078  | 0.154397 | 28965284  | 28965927  | 28968702  | 2896967!  |
| 372 NA12740 | [2515685 chr11 | 11 | 48284073  | 48284771  | 699     | 2    | 1.040426  | 0.104094 | 48283862  | 48284285  | 48284572  | 4828497!  |
| 373 NA12740 | [2515685 chr11 | 11 | 49040083  | 49051212  | 11130   | 26   | -0.435064 | 0.027333 | 49039543  | 49040624  | 49050687  | 4905173!  |
| 374 NA12740 | [2515685 chr11 | 11 | 49074219  | 49075952  | 1734    | 3    | 0.435152  | 0.081754 | 49074029  | 49074409  | 49075650  | 4907625!  |
| 375 NA12740 | [2515685 chr11 | 11 | 49665830  | 49715832  | 50003   | 35   | 0.455424  | 0.024823 | 49665251  | 49666410  | 49712748  | 4972198!  |
| 376 NA12740 | [2515685 chr11 | 11 | 60721034  | 60772727  | 51694   | 69   | 0.443396  | 0.015171 | 60720112  | 60721956  | 60772548  | 6077290!  |
| 377 NA12740 | [2515685 chr11 | 11 | 73812690  | 73818580  | 5891    | 4    | -0.484518 | 0.076724 | 73812400  | 73812981  | 73818213  | 7381894!  |
| 378 NA12740 | [2515685 chr11 | 11 | 85566746  | 85576542  | 9797    | 10   | -0.900053 | 0.05298  | 85566045  | 85567448  | 85574488  | 8557722!  |
| 379 NA12740 | [2515685 chr11 | 11 | 89135297  | 89146818  | 11522   | 17   | -0.516565 | 0.036316 | 89134626  | 89135969  | 89146370  | 8914726!  |
| 380 NA12740 | [2515685 chr11 | 11 | 89184898  | 89189792  | 4895    | 5    | 0.43123   | 0.077247 | 89184243  | 89185554  | 89189177  | 8919040!  |
| 381 NA12740 | [2515685 chr11 | 11 | 89260124  | 89266247  | 6124    | 10   | -0.254458 | 0.046868 | 89259811  | 89260437  | 89265993  | 8926650!  |
| 382 NA12740 | [2515685 chr11 | 11 | 89323920  | 89330042  | 6123    | 12   | -0.271877 | 0.04209  | 89323666  | 89324175  | 89329729  | 8933035!  |
| 383 NA12740 | [2515685 chr11 | 11 | 89438807  | 89450293  | 11487   | 16   | -0.594851 | 0.037965 | 89438380  | 89439235  | 89449639  | 8945094!  |
| 384 NA12740 | [2515685 chr11 | 11 | 90543805  | 90552703  | 8899    | 11   | -0.842821 | 0.046096 | 90541777  | 90545833  | 90552435  | 9055297!  |
| 385 NA12740 | [2515685 chr11 | 11 | 106744846 | 106751055 | 6210    | 9    | -0.770909 | 0.056059 | 106744561 | 106745131 | 106747971 | 10675483! |
| 386 NA12740 | [2515685 chr11 | 11 | 134107699 | 134112290 | 4592    | 5    | 0.766103  | 0.07015  | 134106591 | 134108808 | 134111845 | 13411273! |
| 387 NA12740 | [2515685 chr12 | 12 | 2112534   | 2127044   | 14511   | 15   | 0.697289  | 0.038889 | 2109107   | 2115961   | 2126809   | 212727!   |
| 388 NA12740 | [2515685 chr12 | 12 | 8263675   | 8270350   | 6676    | 17   | 0.311282  | 0.03245  | 8263598   | 8263752   | 8269654   | 827104!   |
| 389 NA12740 | [2515685 chr12 | 12 | 9524239   | 9610804   | 86566   | 93   | 1.01383   | 0.017531 | 9523968   | 9524510   | 9610082   | 961152!   |
| 390 NA12740 | [2515685 chr12 | 12 | 9610804   | 9624971   | 14168   | 14   | 0.326024  | 0.038426 | 9610082   | 9611526   | 9623223   | 962672!   |
| 391 NA12740 | [2515685 chr12 | 12 | 11053521  | 11056089  | 2569    | 5    | 0.396297  | 0.069926 | 11053325  | 11053718  | 11055818  | 1105636!  |
| 392 NA12740 | [2515685 chr12 | 12 | 11070849  | 11144680  | 73832   | 90   | -0.360751 | 0.015687 | 11069857  | 11071841  | 11144324  | 1114503!  |
| 393 NA12740 | [2515685 chr12 | 12 | 11318179  | 11319755  | 1577    | 3    | -0.528452 | 0.092394 | 11317997  | 11318362  | 11319399  | 1132011!  |
| 394 NA12740 | [2515685 chr12 | 12 | 11358248  | 11366431  | 8184    | 5    | -0.484963 | 0.060845 | 11357894  | 11358603  | 11366138  | 1136672!  |
| 395 NA12740 | [2515685 chr12 | 12 | 11396413  | 11398049  | 1637    | 2    | -0.485599 | 0.088999 | 11395931  | 11396895  | 11397507  | 1139859!  |
| 396 NA12740 | [2515685 chr12 | 12 | 11398049  | 11436142  | 38094   | 34   | -1.632103 | 0.033501 | 11397507  | 11398591  | 11435669  | 1143661!  |
| 397 NA12740 | [2515685 chr12 | 12 | 11436142  | 11463223  | 27082   | 32   | -0.505119 | 0.026943 | 11435669  | 11436615  | 11459990  | 1146645!  |
| 398 NA12740 | [2515685 chr12 | 12 | 12605956  | 12607299  | 1344    | 2    | 0.890434  | 0.130288 | 12605559  | 12606353  | 12606864  | 1260773!  |
| 399 NA12740 | [2515685 chr12 | 12 | 31157786  | 31161854  | 4069    | 4    | 0.529636  | 0.075329 | 31157274  | 31158299  | 31161033  | 3116267!  |
| 400 NA12740 | [2515685 chr12 | 12 | 31166636  | 31299025  | 132390  | 127  | 0.648135  | 0.013576 | 31164617  | 31168656  | 31298687  | 3129936!  |
| 401 NA12740 | [2515685 chr12 | 12 | 31894113  | 31954554  | 60442   | 56   | 0.495514  | 0.019565 | 31890959  | 31897268  | 31954242  | 3195486!  |
| 402 NA12740 | [2515685 chr12 | 12 | 56229519  | 56231229  | 1711    | 2    | 0.616171  | 0.11854  | 56229263  | 56229775  | 56230948  | 5623151!  |
| 403 NA12740 | [2515685 chr12 | 12 | 57004588  | 57020201  | 15614   | 8    | 0.274591  | 0.051764 | 57004218  | 57004958  | 57019624  | 5702077!  |
| 404 NA12740 | [2515685 chr12 | 12 | 62184306  | 62189352  | 5047    | 2    | -0.706411 | 0.119656 | 62183601  | 62185011  | 62186044  | 6219266!  |
| 405 NA12740 | [2515685 chr12 | 12 | 78656134  | 78664516  | 8383    | 8    | -0.51672  | 0.053248 | 78654687  | 78657582  | 78664296  | 7866473!  |
| 406 NA12740 | [2515685 chr12 | 12 | 130798727 | 130802870 | 4144    | 5    | -0.799282 | 0.063748 | 130798268 | 130799187 | 130801345 | 13080439! |
| 407 NA12740 | [2515685 chr12 | 12 | 131046250 | 131046750 | 501     | 2    | 1.129386  | 0.121949 | 131046129 | 131046371 | 131046551 | 1310469!  |
| 408 NA12740 | [2515685 chr13 | 13 | 25947233  | 25950398  | 3166    | 3    | 3.782655  | 0.167744 | 25946194  | 25948272  | 25949415  | 2595138!  |
| 409 NA12740 | [2515685 chr13 | 13 | 36971484  | 36983475  | 11992   | 10   | -0.84082  | 0.051731 | 36969416  | 36973552  | 36982905  | 3698404!  |
| 410 NA12740 | [2515685 chr13 | 13 | 56611711  | 56645734  | 34024   | 47   | -0.361521 | 0.01695  | 56610946  | 56612477  | 56645321  | 5664614!  |
| 411 NA12740 | [2515685 chr13 | 13 | 69633905  | 69673289  | 39385   | 42   | 0.861985  | 0.024189 | 69633412  | 69634399  | 69672985  | 6967359!  |
| 412 NA12740 | [2515685 chr13 | 13 | 71375850  | 71378291  | 2442    | 2    | -0.801763 | 0.12864  | 71374967  | 71376734  | 71377584  | 7137899!  |
| 413 NA12740 | [2515685 chr13 | 13 | 110502383 | 110503129 | 747     | 3    | -1.029877 | 0.103617 | 110502225 | 110502541 | 110502890 | 11050336! |
| 414 NA12740 | [2515685 chr13 | 13 | 113079647 | 113086821 | 7175    | 3    | 0.835516  | 0.085696 | 113078890 | 113080404 | 113082138 | 11309434! |
| 415 NA12740 | [2515685 chr14 | 14 | 18435294  | 19494842  | 1059549 | 1601 | -0.483488 | 0.003525 | 18434782  | 18435807  | 19494444  | 1949524!  |

|             |                |    |           |           |        |     |           |          |           |           |           |          |
|-------------|----------------|----|-----------|-----------|--------|-----|-----------|----------|-----------|-----------|-----------|----------|
| 416 NA12740 | [2515685 chr14 | 14 | 19619351  | 19625484  | 6134   | 3   | 3.615778  | 0.195844 | 19612261  | 19624114  | 19625018  | 19625951 |
| 417 NA12740 | [2515685 chr14 | 14 | 34499224  | 34502267  | 3044   | 3   | -0.504146 | 0.082216 | 34498536  | 34499912  | 34501891  | 3450264  |
| 418 NA12740 | [2515685 chr14 | 14 | 40679041  | 40739449  | 60409  | 57  | -0.847402 | 0.021279 | 40678078  | 40680005  | 40739212  | 4073968  |
| 419 NA12740 | [2515685 chr14 | 14 | 46003952  | 46005480  | 1529   | 2   | 0.595127  | 0.117164 | 46003423  | 46004481  | 46005073  | 4600588  |
| 420 NA12740 | [2515685 chr14 | 14 | 53780053  | 53783579  | 3527   | 6   | -0.82883  | 0.070103 | 53779833  | 53779823  | 53783238  | 5378392  |
| 421 NA12740 | [2515685 chr14 | 14 | 69086774  | 69092832  | 6059   | 6   | -0.877307 | 0.058574 | 69086153  | 69087395  | 69092239  | 6909342  |
| 422 NA12740 | [2515685 chr14 | 14 | 73052083  | 73053781  | 1699   | 2   | -0.445767 | 0.083431 | 73051714  | 73052452  | 73052927  | 7305463  |
| 423 NA12740 | [2515685 chr14 | 14 | 73063171  | 73119729  | 56559  | 51  | 0.409494  | 0.020664 | 73061866  | 73064476  | 73118276  | 7312118  |
| 424 NA12740 | [2515685 chr14 | 14 | 104766812 | 104778505 | 11694  | 145 | -0.392737 | 0.010933 | 104766457 | 104767167 | 104778286 | 10477872 |
| 425 NA12740 | [2515685 chr15 | 15 | 18539408  | 18561636  | 22229  | 23  | -0.298981 | 0.026122 | 18539239  | 18539578  | 18561325  | 1856194  |
| 426 NA12740 | [2515685 chr15 | 15 | 18632498  | 18704122  | 71625  | 69  | -0.319585 | 0.017379 | 18632318  | 18632679  | 18703644  | 1870460  |
| 427 NA12740 | [2515685 chr15 | 15 | 18840785  | 18849369  | 8585   | 13  | -0.803507 | 0.042697 | 18839417  | 18842153  | 18848726  | 1885001  |
| 428 NA12740 | [2515685 chr15 | 15 | 19044664  | 19092673  | 48010  | 56  | -0.269281 | 0.017503 | 19044489  | 19044840  | 19092490  | 1909285  |
| 429 NA12740 | [2515685 chr15 | 15 | 19555347  | 19573464  | 18118  | 21  | -0.288859 | 0.026906 | 19551073  | 19557651  | 19573155  | 1957377  |
| 430 NA12740 | [2515685 chr15 | 15 | 19643788  | 19647021  | 3234   | 4   | -0.486272 | 0.07101  | 19643557  | 19644019  | 19646680  | 1964736  |
| 431 NA12740 | [2515685 chr15 | 15 | 19797016  | 19805080  | 8065   | 17  | -0.470172 | 0.033475 | 19796797  | 19797235  | 19804866  | 1980529  |
| 432 NA12740 | [2515685 chr15 | 15 | 19807069  | 19814320  | 7252   | 3   | -0.413686 | 0.076179 | 19806541  | 19807597  | 19812016  | 1981765  |
| 433 NA12740 | [2515685 chr15 | 15 | 20228094  | 20234328  | 6235   | 12  | 0.513228  | 0.040198 | 20226486  | 20229703  | 20237781  | 2023487  |
| 434 NA12740 | [2515685 chr15 | 15 | 21003489  | 21051502  | 48014  | 50  | -0.26477  | 0.018353 | 21003314  | 21003665  | 21051321  | 2105168  |
| 435 NA12740 | [2515685 chr15 | 15 | 21606753  | 21614602  | 7850   | 7   | 0.942279  | 0.062109 | 21606459  | 21607047  | 21612298  | 2163669  |
| 436 NA12740 | [2515685 chr15 | 15 | 23405783  | 23406852  | 1070   | 2   | -0.521478 | 0.099787 | 23405591  | 23405975  | 23406334  | 2340737  |
| 437 NA12740 | [2515685 chr15 | 15 | 23482566  | 23483671  | 1106   | 2   | 0.74569   | 0.082865 | 23482224  | 23482908  | 23483437  | 2348390  |
| 438 NA12740 | [2515685 chr15 | 15 | 24986053  | 24992250  | 6198   | 7   | 0.870201  | 0.061803 | 24985426  | 24986680  | 24991680  | 2499282  |
| 439 NA12740 | [2515685 chr15 | 15 | 26217166  | 26237166  | 20001  | 27  | -0.264625 | 0.027224 | 26216679  | 26217654  | 26236894  | 2623743  |
| 440 NA12740 | [2515685 chr15 | 15 | 26331811  | 26343818  | 12008  | 25  | 0.55379   | 0.027318 | 26331265  | 26332358  | 26342288  | 2634534  |
| 441 NA12740 | [2515685 chr15 | 15 | 26538169  | 26542764  | 4596   | 11  | 0.563824  | 0.039548 | 26538129  | 26538209  | 26542214  | 2654331  |
| 442 NA12740 | [2515685 chr15 | 15 | 26875842  | 26877026  | 1185   | 2   | 1.199077  | 0.124641 | 26875299  | 26876385  | 26876824  | 2687722  |
| 443 NA12740 | [2515685 chr15 | 15 | 32515477  | 32598425  | 82949  | 70  | 0.625751  | 0.018819 | 32514954  | 32516000  | 32597169  | 3259968  |
| 444 NA12740 | [2515685 chr15 | 15 | 32638982  | 32640064  | 1083   | 2   | 0.714991  | 0.103428 | 32638493  | 32639472  | 32639564  | 3264056  |
| 445 NA12740 | [2515685 chr15 | 15 | 42905343  | 42906197  | 855    | 3   | -0.39153  | 0.075819 | 42905218  | 42905469  | 42905981  | 4290641  |
| 446 NA12740 | [2515685 chr15 | 15 | 43174523  | 43176116  | 1594   | 2   | 0.576517  | 0.100361 | 43174245  | 43174801  | 43175562  | 4317667  |
| 447 NA12740 | [2515685 chr15 | 15 | 74678877  | 74682822  | 3946   | 7   | -3.979585 | 0.137543 | 74678381  | 74679373  | 74680518  | 7468951  |
| 448 NA12740 | [2515685 chr15 | 15 | 75117585  | 75119946  | 2362   | 4   | -1.974083 | 0.108584 | 75117343  | 75117827  | 75119741  | 7512015  |
| 449 NA12740 | [2515685 chr15 | 15 | 80588100  | 80588985  | 886    | 2   | -0.453    | 0.082167 | 80587699  | 80588502  | 80588602  | 8058936  |
| 450 NA12740 | [2515685 chr15 | 15 | 80982676  | 80983561  | 886    | 2   | -0.452998 | 0.082167 | 80982275  | 80983078  | 80983178  | 8098394  |
| 451 NA12740 | [2515685 chr15 | 15 | 82869847  | 82880157  | 10311  | 4   | -0.408327 | 0.067536 | 82860467  | 82872151  | 82877853  | 8289101  |
| 452 NA12740 | [2515685 chr15 | 15 | 83581911  | 83582575  | 665    | 2   | -0.452998 | 0.082167 | 83581731  | 83582092  | 83582192  | 8358295  |
| 453 NA12740 | [2515685 chr15 | 15 | 83685983  | 83688723  | 2741   | 2   | -0.591009 | 0.104857 | 83684729  | 83687238  | 83687705  | 8368974  |
| 454 NA12740 | [2515685 chr15 | 15 | 98234084  | 98240716  | 6633   | 8   | 0.851515  | 0.056715 | 98233842  | 98234327  | 98239350  | 9824208  |
| 455 NA12740 | [2515685 chr15 | 15 | 100109640 | 100122682 | 13043  | 98  | 0.395877  | 0.011995 | 100108905 | 100110376 | 100122315 | 10012305 |
| 456 NA12740 | [2515685 chr16 | 16 | 8532      | 21570     | 13039  | 13  | -0.345769 | 0.040429 | 7571      | 9494      | 21285     | 21856    |
| 457 NA12740 | [2515685 chr16 | 16 | 669910    | 671309    | 1400   | 2   | 0.958828  | 0.127255 | 669664    | 670156    | 670956    | 671663   |
| 458 NA12740 | [2515685 chr16 | 16 | 5287117   | 5290636   | 3520   | 2   | 0.881527  | 0.137015 | 5286149   | 5288085   | 5288751   | 529327   |
| 459 NA12740 | [2515685 chr16 | 16 | 12563891  | 12565579  | 1689   | 2   | -0.599893 | 0.095855 | 12563523  | 12564260  | 12565191  | 1256596  |
| 460 NA12740 | [2515685 chr16 | 16 | 16633469  | 16639120  | 5652   | 4   | 0.865758  | 0.075649 | 16632502  | 16634437  | 16638386  | 1663985  |
| 461 NA12740 | [2515685 chr16 | 16 | 19853133  | 19869230  | 16098  | 14  | -0.746645 | 0.041011 | 19852680  | 19853587  | 19867345  | 1987941  |
| 462 NA12740 | [2515685 chr16 | 16 | 28523879  | 28525408  | 1530   | 2   | -0.788611 | 0.101052 | 28523170  | 28524588  | 28525115  | 2852570  |
| 463 NA12740 | [2515685 chr16 | 16 | 30101364  | 30102578  | 1215   | 2   | 0.726247  | 0.116549 | 30101045  | 30101684  | 30102223  | 3010293  |
| 464 NA12740 | [2515685 chr16 | 16 | 31900721  | 31901605  | 885    | 2   | 0.836516  | 0.109833 | 31900500  | 31900942  | 31901267  | 3190194  |
| 465 NA12740 | [2515685 chr16 | 16 | 32106365  | 32106660  | 296    | 2   | 1.064741  | 0.122288 | 32106136  | 32106595  | 32106634  | 3210668  |
| 466 NA12740 | [2515685 chr16 | 16 | 32150890  | 32236305  | 85416  | 162 | -0.299058 | 0.010221 | 32150057  | 32151724  | 32236095  | 3223651  |
| 467 NA12740 | [2515685 chr16 | 16 | 32479452  | 32616183  | 136732 | 216 | -0.303446 | 0.009333 | 32400448  | 32481337  | 32615350  | 3261701  |
| 468 NA12740 | [2515685 chr16 | 16 | 32660409  | 32660703  | 295    | 2   | 1.064741  | 0.122288 | 32660384  | 32660435  | 32660474  | 3266093  |
| 469 NA12740 | [2515685 chr16 | 16 | 33047346  | 33047640  | 295    | 2   | 1.064741  | 0.122288 | 33047117  | 33047575  | 33047614  | 3304766  |
| 470 NA12740 | [2515685 chr16 | 16 | 33091854  | 33398299  | 306446 | 506 | -0.270716 | 0.005973 | 33091021  | 33092688  | 33397990  | 3339860  |

|             |                |    |          |          |        |     |           |          |          |          |          |          |
|-------------|----------------|----|----------|----------|--------|-----|-----------|----------|----------|----------|----------|----------|
| 471 NA12740 | [2515685 chr16 | 16 | 33443720 | 33475797 | 32078  | 17  | -0.388059 | 0.035399 | 33443472 | 33443968 | 33475636 | 3347595! |
| 472 NA12740 | [2515685 chr16 | 16 | 33502420 | 33534345 | 31926  | 35  | -0.397032 | 0.025049 | 33502141 | 33502700 | 33533464 | 3353522! |
| 473 NA12740 | [2515685 chr16 | 16 | 33676280 | 33684025 | 7746   | 15  | -0.342213 | 0.036936 | 33676178 | 33676383 | 33683516 | 3368453! |
| 474 NA12740 | [2515685 chr16 | 16 | 34316873 | 34609078 | 292206 | 324 | -0.5079   | 0.008237 | 34316562 | 34317185 | 34607193 | 3461732! |
| 475 NA12740 | [2515685 chr16 | 16 | 57204541 | 57207585 | 3045   | 3   | 5.315482  | 0.220695 | 57204170 | 57204913 | 57206938 | 5720823! |
| 476 NA12740 | [2515685 chr16 | 16 | 57231525 | 57234603 | 3079   | 2   | -1.722814 | 0.111772 | 57230452 | 57232599 | 57233543 | 5723566! |
| 477 NA12740 | [2515685 chr16 | 16 | 68534746 | 68564761 | 30016  | 47  | -0.273296 | 0.01959  | 68534434 | 68535058 | 68563823 | 6856570! |
| 478 NA12740 | [2515685 chr16 | 16 | 68702274 | 68791353 | 89080  | 122 | -0.430035 | 0.012894 | 68701593 | 68702955 | 68789873 | 6879283! |
| 479 NA12740 | [2515685 chr16 | 16 | 72923059 | 72965445 | 42387  | 39  | -0.490235 | 0.023225 | 72922372 | 72923746 | 72964811 | 7296607! |
| 480 NA12740 | [2515685 chr16 | 16 | 83994929 | 84004171 | 9243   | 81  | 0.56197   | 0.014678 | 83994558 | 83995300 | 84003767 | 8400457! |
| 481 NA12740 | [2515685 chr16 | 16 | 84562720 | 84565235 | 2516   | 11  | 0.373373  | 0.04572  | 84561685 | 84563756 | 84565142 | 8456532! |
| 482 NA12740 | [2515685 chr16 | 16 | 85087756 | 85089036 | 1281   | 2   | 1.013468  | 0.118989 | 85087427 | 85088085 | 85088690 | 8508938! |
| 483 NA12740 | [2515685 chr16 | 16 | 86589422 | 86592315 | 2894   | 4   | -0.441113 | 0.075771 | 86589032 | 86589812 | 86591962 | 8659266! |
| 484 NA12740 | [2515685 chr16 | 16 | 86669849 | 86672366 | 2518   | 2   | -0.881272 | 0.08914  | 86669288 | 86670411 | 86671217 | 8667351! |
| 485 NA12740 | [2515685 chr16 | 16 | 88167802 | 88169956 | 2155   | 2   | 0.629008  | 0.122698 | 88167242 | 88168362 | 88168963 | 8817094! |
| 486 NA12740 | [2515685 chr16 | 16 | 88181036 | 88182713 | 1678   | 2   | 1.037022  | 0.112976 | 88180612 | 88181461 | 88182173 | 8818325! |
| 487 NA12740 | [2515685 chr17 | 17 | 911980   | 915554   | 3575   | 4   | -1.025394 | 0.079401 | 911452   | 912508   | 915413   | 91569!   |
| 488 NA12740 | [2515685 chr17 | 17 | 966845   | 969578   | 2734   | 21  | 0.347106  | 0.034606 | 966537   | 967154   | 969378   | 96977!   |
| 489 NA12740 | [2515685 chr17 | 17 | 17123642 | 17127198 | 3557   | 4   | 0.38492   | 0.073072 | 17123302 | 17123983 | 17126001 | 1712839! |
| 490 NA12740 | [2515685 chr17 | 17 | 18306470 | 18307337 | 868    | 2   | 0.544085  | 0.08572  | 18306190 | 18306750 | 18306916 | 1830775! |
| 491 NA12740 | [2515685 chr17 | 17 | 18331739 | 18332345 | 607    | 2   | -0.535705 | 0.095876 | 18331509 | 18331970 | 18331978 | 1833271! |
| 492 NA12740 | [2515685 chr17 | 17 | 20299935 | 20300531 | 597    | 2   | -0.535705 | 0.095876 | 20299568 | 20300303 | 20300311 | 2030075! |
| 493 NA12740 | [2515685 chr17 | 17 | 20325192 | 20325864 | 673    | 2   | 0.544071  | 0.085719 | 20324968 | 20325416 | 20325582 | 2032614! |
| 494 NA12740 | [2515685 chr17 | 17 | 21415030 | 21418282 | 3253   | 2   | -0.708907 | 0.11783  | 21410935 | 21417234 | 21417641 | 2141892! |
| 495 NA12740 | [2515685 chr17 | 17 | 21826349 | 21834752 | 8404   | 7   | -0.565948 | 0.047493 | 21826238 | 21826461 | 21833710 | 2183579! |
| 496 NA12740 | [2515685 chr17 | 17 | 21945626 | 21954909 | 9284   | 15  | -0.372688 | 0.036756 | 21945338 | 21945915 | 21954628 | 2195519! |
| 497 NA12740 | [2515685 chr17 | 17 | 23009572 | 23010538 | 967    | 2   | 0.476895  | 0.095263 | 23009093 | 23010051 | 23010060 | 2301101! |
| 498 NA12740 | [2515685 chr17 | 17 | 31461893 | 31504184 | 42292  | 33  | 0.537087  | 0.02572  | 31461623 | 31462164 | 31503784 | 3150458! |
| 499 NA12740 | [2515685 chr17 | 17 | 31532462 | 31538026 | 5565   | 7   | 0.303342  | 0.047232 | 31532146 | 31532779 | 31537274 | 3153877! |
| 500 NA12740 | [2515685 chr17 | 17 | 31638641 | 31639615 | 975    | 2   | 0.509003  | 0.093271 | 31638447 | 31638836 | 31638863 | 3164036! |
| 501 NA12740 | [2515685 chr17 | 17 | 32829500 | 32833231 | 3732   | 5   | 0.801603  | 0.076093 | 32828825 | 32830175 | 32832670 | 3283379! |
| 502 NA12740 | [2515685 chr17 | 17 | 41035524 | 41036525 | 1002   | 2   | 1.167313  | 0.10698  | 41035120 | 41035928 | 41035967 | 4103708! |
| 503 NA12740 | [2515685 chr17 | 17 | 41521287 | 41676708 | 155422 | 154 | 0.47217   | 0.010564 | 41521002 | 41521572 | 41676309 | 4167710! |
| 504 NA12740 | [2515685 chr17 | 17 | 41694440 | 41717869 | 23430  | 22  | 0.47217   | 0.010564 | 41693144 | 41695737 | 41716390 | 4171934! |
| 505 NA12740 | [2515685 chr17 | 17 | 41779931 | 41787296 | 7366   | 4   | 0.441872  | 0.064598 | 41779457 | 41780406 | 41786164 | 4178842! |
| 506 NA12740 | [2515685 chr17 | 17 | 41964733 | 41986331 | 21599  | 26  | 0.272941  | 0.02502  | 41964517 | 41964949 | 41986039 | 4198662! |
| 507 NA12740 | [2515685 chr17 | 17 | 41997426 | 42004139 | 6714   | 3   | 0.457903  | 0.069897 | 41996952 | 41997901 | 42002352 | 4200592! |
| 508 NA12740 | [2515685 chr17 | 17 | 42905976 | 42908985 | 3010   | 2   | 0.863127  | 0.126455 | 42905585 | 42906368 | 42906957 | 4291101! |
| 509 NA12740 | [2515685 chr17 | 17 | 75502752 | 75504508 | 1757   | 3   | -0.513328 | 0.090937 | 75502474 | 75503031 | 75504219 | 7550479! |
| 510 NA12740 | [2515685 chr18 | 18 | 9805250  | 9806206  | 957    | 2   | -0.675653 | 0.109777 | 9804637  | 9805863  | 9806038  | 980637!  |
| 511 NA12740 | [2515685 chr18 | 18 | 14450565 | 14465978 | 15414  | 19  | -0.259183 | 0.032769 | 14450322 | 14450809 | 14465760 | 1446619! |
| 512 NA12740 | [2515685 chr18 | 18 | 14726980 | 14736224 | 9245   | 13  | -0.363183 | 0.039057 | 14726667 | 14727294 | 14735973 | 1473647! |
| 513 NA12740 | [2515685 chr18 | 18 | 28142218 | 28143399 | 1182   | 2   | 0.952935  | 0.121261 | 28141854 | 28142583 | 28143055 | 2814374! |
| 514 NA12740 | [2515685 chr18 | 18 | 36514289 | 36521090 | 6802   | 6   | -0.814618 | 0.063484 | 36513759 | 36514820 | 36520512 | 3652166! |
| 515 NA12740 | [2515685 chr18 | 18 | 61874791 | 61883105 | 8315   | 9   | -0.935038 | 0.052616 | 61874483 | 61875100 | 61882738 | 6188347! |
| 516 NA12740 | [2515685 chr18 | 18 | 61917747 | 61920171 | 2425   | 4   | 2.983294  | 0.142494 | 61917522 | 61917973 | 61919646 | 6192069! |
| 517 NA12740 | [2515685 chr18 | 18 | 74231104 | 74234275 | 3172   | 30  | -0.330528 | 0.021544 | 74230952 | 74231256 | 74234139 | 7423441! |
| 518 NA12740 | [2515685 chr18 | 18 | 74297715 | 74299391 | 1677   | 5   | 0.654322  | 0.060917 | 74297243 | 74298187 | 74299167 | 7429961! |
| 519 NA12740 | [2515685 chr18 | 18 | 74373005 | 74376367 | 3363   | 7   | 0.737207  | 0.045622 | 74372064 | 74373947 | 74375833 | 7437690! |
| 520 NA12740 | [2515685 chr18 | 18 | 74392800 | 74398225 | 5426   | 4   | 0.558168  | 0.073701 | 74390826 | 74394774 | 74397790 | 7439866! |
| 521 NA12740 | [2515685 chr19 | 19 | 241274   | 243460   | 2187   | 3   | 0.626403  | 0.096521 | 240981   | 241567   | 243051   | 24386!   |
| 522 NA12740 | [2515685 chr19 | 19 | 252671   | 255224   | 2554   | 8   | 0.341195  | 0.051533 | 251836   | 253507   | 254742   | 25570!   |
| 523 NA12740 | [2515685 chr19 | 19 | 331568   | 333129   | 1562   | 2   | 0.944725  | 0.099954 | 331314   | 331822   | 332310   | 33394!   |
| 524 NA12740 | [2515685 chr19 | 19 | 8709642  | 8759814  | 50173  | 87  | -0.263169 | 0.012982 | 8709264  | 8710021  | 8759419  | 876020!  |
| 525 NA12740 | [2515685 chr19 | 19 | 23007897 | 23014812 | 6916   | 7   | 0.750873  | 0.062011 | 22990964 | 23010431 | 23014157 | 2301546! |

|             |                |    |          |          |        |     |           |          |          |          |          |          |
|-------------|----------------|----|----------|----------|--------|-----|-----------|----------|----------|----------|----------|----------|
| 526 NA12740 | [2515685 chr19 | 19 | 23108259 | 23109446 | 1188   | 2   | 0.961909  | 0.113365 | 23107903 | 23108615 | 23108879 | 2311001- |
| 527 NA12740 | [2515685 chr19 | 19 | 23597182 | 23600235 | 3054   | 5   | -3.168603 | 0.125122 | 23596541 | 23597823 | 23599600 | 23600871 |
| 528 NA12740 | [2515685 chr19 | 19 | 39419837 | 39421349 | 1513   | 3   | 0.663059  | 0.098321 | 39419616 | 39420059 | 39421018 | 39421687 |
| 529 NA12740 | [2515685 chr19 | 19 | 40540866 | 40541878 | 1013   | 3   | -0.868178 | 0.086609 | 40540646 | 40541086 | 40541551 | 40542201 |
| 530 NA12740 | [2515685 chr19 | 19 | 40543556 | 40545135 | 1580   | 3   | -3.269187 | 0.16545  | 40543292 | 40543821 | 40544782 | 40545481 |
| 531 NA12740 | [2515685 chr19 | 19 | 40547370 | 40553596 | 6227   | 2   | -4.529213 | 0.261925 | 40546632 | 40548109 | 40553353 | 40553841 |
| 532 NA12740 | [2515685 chr19 | 19 | 40553596 | 40554347 | 752    | 2   | -0.736883 | 0.096575 | 40553353 | 40553840 | 40554020 | 40554671 |
| 533 NA12740 | [2515685 chr19 | 19 | 40577578 | 40579157 | 1580   | 2   | 0.461566  | 0.082167 | 40576676 | 40578480 | 40578898 | 40579411 |
| 534 NA12740 | [2515685 chr19 | 19 | 45410651 | 45412403 | 1753   | 3   | 0.560575  | 0.096007 | 45410153 | 45411150 | 45412241 | 45412561 |
| 535 NA12740 | [2515685 chr19 | 19 | 46042398 | 46072673 | 30276  | 34  | -0.338231 | 0.02529  | 46042050 | 46042747 | 46072511 | 46072831 |
| 536 NA12740 | [2515685 chr19 | 19 | 47944474 | 48046596 | 102123 | 81  | 0.329998  | 0.015574 | 47939154 | 47947008 | 48046127 | 48047061 |
| 537 NA12740 | [2515685 chr19 | 19 | 48409526 | 48449827 | 40302  | 22  | 0.375957  | 0.03217  | 48408041 | 48411011 | 48449594 | 48450067 |
| 538 NA12740 | [2515685 chr19 | 19 | 53101846 | 53152329 | 50484  | 98  | -0.312757 | 0.012246 | 53101305 | 53102387 | 53152311 | 53152347 |
| 539 NA12740 | [2515685 chr19 | 19 | 55285877 | 55336157 | 50281  | 104 | -0.316636 | 0.011809 | 55285730 | 55286025 | 55335244 | 55337071 |
| 540 NA12740 | [2515685 chr19 | 19 | 56824422 | 56827216 | 2795   | 5   | -0.626852 | 0.066825 | 56824136 | 56824709 | 56826331 | 56828107 |
| 541 NA12740 | [2515685 chr19 | 19 | 56827216 | 56836311 | 9096   | 7   | -3.775592 | 0.111261 | 56826331 | 56828101 | 56834905 | 56837711 |
| 542 NA12740 | [2515685 chr19 | 19 | 56836311 | 56841964 | 5654   | 9   | -0.85071  | 0.050259 | 56834905 | 56837718 | 56841608 | 56842327 |
| 543 NA12740 | [2515685 chr19 | 19 | 58209430 | 58245460 | 36031  | 28  | -0.729286 | 0.028211 | 58208997 | 58209863 | 58245024 | 58245891 |
| 544 NA12740 | [2515685 chr19 | 19 | 60958920 | 60976029 | 17110  | 15  | -0.475132 | 0.037485 | 60957933 | 60959907 | 60975748 | 60976311 |
| 545 NA12740 | [2515685 chr20 | 20 | 15249645 | 15251805 | 2161   | 2   | -0.995199 | 0.110621 | 15249381 | 15249909 | 15251287 | 15252327 |
| 546 NA12740 | [2515685 chr20 | 20 | 26136252 | 26138483 | 2232   | 4   | 0.422435  | 0.078682 | 26135878 | 26136626 | 26137783 | 26139187 |
| 547 NA12740 | [2515685 chr20 | 20 | 28030713 | 28123036 | 92324  | 85  | -0.34987  | 0.016092 | 26206531 | 28034133 | 28122592 | 28123481 |
| 548 NA12740 | [2515685 chr20 | 20 | 28183119 | 28191409 | 8291   | 6   | -0.353986 | 0.05846  | 28182980 | 28183258 | 28191193 | 28191621 |
| 549 NA12740 | [2515685 chr20 | 20 | 49817373 | 49819212 | 1840   | 2   | 1.010972  | 0.121304 | 49816867 | 49817880 | 49818962 | 49819467 |
| 550 NA12740 | [2515685 chr20 | 20 | 55717505 | 55719029 | 1525   | 2   | 0.641648  | 0.090959 | 55717058 | 55717952 | 55718431 | 55719621 |
| 551 NA12740 | [2515685 chr20 | 20 | 59951513 | 59957050 | 5538   | 18  | 0.925788  | 0.036599 | 59950681 | 59952345 | 59956538 | 59957567 |
| 552 NA12740 | [2515685 chr20 | 20 | 61708834 | 61711805 | 2972   | 22  | -0.435732 | 0.031321 | 61708573 | 61709096 | 61711616 | 61711991 |
| 553 NA12740 | [2515685 chr20 | 20 | 62233505 | 62235897 | 2393   | 4   | 0.692584  | 0.058101 | 62232847 | 62234163 | 62235101 | 62236697 |
| 554 NA12740 | [2515685 chr21 | 21 | 13973513 | 13980758 | 7246   | 14  | -0.339226 | 0.037081 | 13973295 | 13973731 | 13980622 | 13980891 |
| 555 NA12740 | [2515685 chr22 | 22 | 14466121 | 14839804 | 373684 | 704 | -0.484856 | 0.005263 | 14466002 | 14466240 | 14839439 | 14840171 |
| 556 NA12740 | [2515685 chr22 | 22 | 15610763 | 15615658 | 4896   | 7   | -0.277949 | 0.054234 | 15610601 | 15610925 | 15615333 | 15615987 |
| 557 NA12740 | [2515685 chr22 | 22 | 17077418 | 17084556 | 7139   | 10  | -0.282023 | 0.043075 | 17077014 | 17077823 | 17081871 | 17087447 |
| 558 NA12740 | [2515685 chr22 | 22 | 17385504 | 17393232 | 7729   | 14  | -0.267434 | 0.039134 | 17385031 | 17385977 | 17392823 | 17393647 |
| 559 NA12740 | [2515685 chr22 | 22 | 18744519 | 18854769 | 110251 | 135 | -0.334037 | 0.012465 | 18742262 | 18746777 | 18854758 | 18854787 |
| 560 NA12740 | [2515685 chr22 | 22 | 19380073 | 19419491 | 39419  | 12  | -0.340355 | 0.043271 | 19377752 | 19382395 | 19416806 | 19449921 |
| 561 NA12740 | [2515685 chr22 | 22 | 19804691 | 19807861 | 3171   | 6   | -0.30995  | 0.0588   | 19804449 | 19804933 | 19807146 | 19808577 |
| 562 NA12740 | [2515685 chr22 | 22 | 20047736 | 20121795 | 74060  | 118 | -0.298099 | 0.008593 | 20047456 | 20048017 | 20121548 | 20122047 |
| 563 NA12740 | [2515685 chr22 | 22 | 20137248 | 20243646 | 106399 | 148 | -0.298099 | 0.008593 | 20136561 | 20137935 | 20240961 | 20302287 |
| 564 NA12740 | [2515685 chr22 | 22 | 22611178 | 22635796 | 24619  | 43  | -0.470843 | 0.015557 | 22609725 | 22612631 | 22635364 | 22636221 |
| 565 NA12740 | [2515685 chr22 | 22 | 22639133 | 22663644 | 24512  | 43  | -0.470843 | 0.015557 | 22638819 | 22639448 | 22662190 | 22665097 |
| 566 NA12740 | [2515685 chr22 | 22 | 22672624 | 22674936 | 2313   | 4   | 1.382511  | 0.093318 | 22672391 | 22672858 | 22674426 | 22675441 |
| 567 NA12740 | [2515685 chr22 | 22 | 22678229 | 22683930 | 5702   | 2   | 0.842067  | 0.110892 | 22678110 | 22678349 | 22681309 | 22686557 |
| 568 NA12740 | [2515685 chr22 | 22 | 22683930 | 22688523 | 4594   | 3   | -0.662547 | 0.095757 | 22681309 | 22686552 | 22687378 | 22689661 |
| 569 NA12740 | [2515685 chr22 | 22 | 22690382 | 22691501 | 1120   | 2   | 1.90986   | 0.122665 | 22690146 | 22690619 | 22691088 | 22691917 |
| 570 NA12740 | [2515685 chr22 | 22 | 22695407 | 22720154 | 24748  | 27  | 1.001373  | 0.036332 | 22695112 | 22695703 | 22719882 | 22720421 |
| 571 NA12740 | [2515685 chr22 | 22 | 33619409 | 33623490 | 4082   | 5   | 0.789678  | 0.066357 | 33618939 | 33619879 | 33622642 | 33624331 |
| 572 NA12740 | [2515685 chr22 | 22 | 43418479 | 43419675 | 1197   | 2   | 0.555441  | 0.101377 | 43418051 | 43418907 | 43419378 | 43419977 |
| 1 NA07048   | [2515685 chr1  | 1  | 49115    | 59097    | 9983   | 17  | 0.552878  | 0.035293 | 48867    | 49364    | 58755    | 5944C    |
| 2 NA07048   | [2515685 chr1  | 1  | 60174    | 76985    | 16812  | 12  | 0.324474  | 0.041206 | 59870    | 60479    | 76641    | 77329    |
| 3 NA07048   | [2515685 chr1  | 1  | 76985    | 77845    | 861    | 2   | -0.680816 | 0.114226 | 76641    | 77329    | 77684    | 78006    |
| 4 NA07048   | [2515685 chr1  | 1  | 604821   | 612159   | 7339   | 7   | -1.113781 | 0.061161 | 604315   | 605328   | 610122   | 614196   |
| 5 NA07048   | [2515685 chr1  | 1  | 1164620  | 1173639  | 9020   | 3   | 0.489981  | 0.08981  | 1160965  | 1167889  | 1173238  | 117404C  |
| 6 NA07048   | [2515685 chr1  | 1  | 1853012  | 1854645  | 1634   | 2   | 1.269021  | 0.099902 | 185216   | 1853409  | 1853816  | 1855477  |
| 7 NA07048   | [2515685 chr1  | 1  | 5304270  | 5305267  | 998    | 20  | 0.27675   | 0.033164 | 5303963  | 5304578  | 5305148  | 5305381  |
| 8 NA07048   | [2515685 chr1  | 1  | 12843376 | 12850337 | 6962   | 10  | 0.487692  | 0.04625  | 12843104 | 12843649 | 12850101 | 12850577 |

|    |         |               |   |           |           |        |     |           |          |           |           |           |           |
|----|---------|---------------|---|-----------|-----------|--------|-----|-----------|----------|-----------|-----------|-----------|-----------|
| 9  | NAO7048 | [2515685 chr1 | 1 | 12884329  | 12886858  | 2530   | 4   | 0.530923  | 0.062166 | 12884224  | 12884434  | 12886536  | 12887181  |
| 10 | NAO7048 | [2515685 chr1 | 1 | 13014231  | 13074923  | 60693  | 5   | -0.320364 | 0.060774 | 13013335  | 13015127  | 13074668  | 13075171  |
| 11 | NAO7048 | [2515685 chr1 | 1 | 13159940  | 13162706  | 2767   | 4   | 0.584285  | 0.058306 | 13159618  | 13160263  | 13162366  | 13163047  |
| 12 | NAO7048 | [2515685 chr1 | 1 | 13380737  | 13383503  | 2767   | 4   | 0.584285  | 0.058306 | 13380415  | 13381060  | 13383163  | 13383844  |
| 13 | NAO7048 | [2515685 chr1 | 1 | 16995196  | 17002150  | 6955   | 10  | -0.434679 | 0.048708 | 16994970  | 16995422  | 17001855  | 17002441  |
| 14 | NAO7048 | [2515685 chr1 | 1 | 25330950  | 25381274  | 50325  | 47  | 0.290624  | 0.016615 | 25330662  | 25331238  | 25380813  | 25381731  |
| 15 | NAO7048 | [2515685 chr1 | 1 | 25391148  | 25408608  | 17461  | 23  | 0.290624  | 0.016615 | 25390773  | 25391523  | 25408376  | 25408841  |
| 16 | NAO7048 | [2515685 chr1 | 1 | 25433785  | 25439981  | 6197   | 15  | 0.294128  | 0.037383 | 25433580  | 25433990  | 25438920  | 25441041  |
| 17 | NAO7048 | [2515685 chr1 | 1 | 55556725  | 55686418  | 129694 | 2   | -0.582453 | 0.101627 | 55440776  | 55559994  | 55683149  | 55796851  |
| 18 | NAO7048 | [2515685 chr1 | 1 | 57265788  | 57269385  | 3598   | 3   | 0.522616  | 0.076113 | 57264976  | 57266601  | 57269038  | 57269773  |
| 19 | NAO7048 | [2515685 chr1 | 1 | 72478372  | 72524180  | 45809  | 36  | -2.82863  | 0.044935 | 72478140  | 72478604  | 72523661  | 72524701  |
| 20 | NAO7048 | [2515685 chr1 | 1 | 89188117  | 89190762  | 2646   | 5   | 1.643502  | 0.090411 | 89187764  | 89188470  | 89190458  | 89191061  |
| 21 | NAO7048 | [2515685 chr1 | 1 | 103852783 | 104015739 | 162957 | 263 | -0.295283 | 0.0081   | 103852543 | 103853023 | 104013178 | 10401830  |
| 22 | NAO7048 | [2515685 chr1 | 1 | 109936541 | 109953240 | 16700  | 22  | 0.493382  | 0.031221 | 109935803 | 109937279 | 109952761 | 109953721 |
| 23 | NAO7048 | [2515685 chr1 | 1 | 109954457 | 109965726 | 11270  | 7   | 0.309882  | 0.057183 | 109954248 | 109954666 | 109965065 | 10996638  |
| 24 | NAO7048 | [2515685 chr1 | 1 | 111089464 | 111100714 | 11251  | 11  | -0.901143 | 0.048654 | 111088288 | 111090640 | 111100119 | 111101311 |
| 25 | NAO7048 | [2515685 chr1 | 1 | 112405902 | 112416691 | 10790  | 10  | 0.637667  | 0.050158 | 112405415 | 112406389 | 112416423 | 11241696  |
| 26 | NAO7048 | [2515685 chr1 | 1 | 116874175 | 116915240 | 41066  | 51  | 0.365601  | 0.020272 | 116873908 | 116874442 | 116914887 | 11691559  |
| 27 | NAO7048 | [2515685 chr1 | 1 | 120244720 | 120342752 | 98033  | 150 | 0.283408  | 0.011613 | 120243262 | 120246178 | 120342542 | 12034296  |
| 28 | NAO7048 | [2515685 chr1 | 1 | 141899765 | 141981850 | 82086  | 191 | 0.267334  | 0.009388 | 141899136 | 141900394 | 141978581 | 14203010  |
| 29 | NAO7048 | [2515685 chr1 | 1 | 142079904 | 142096822 | 16919  | 44  | 0.259989  | 0.019532 | 142079386 | 142080422 | 142096672 | 14209697  |
| 30 | NAO7048 | [2515685 chr1 | 1 | 142438646 | 142569435 | 130790 | 159 | 0.387394  | 0.011518 | 142438189 | 142439104 | 142568775 | 14257009  |
| 31 | NAO7048 | [2515685 chr1 | 1 | 142678373 | 142777852 | 99480  | 164 | 0.268866  | 0.011368 | 142678163 | 142678583 | 142776895 | 14277880  |
| 32 | NAO7048 | [2515685 chr1 | 1 | 145028373 | 145109730 | 81358  | 208 | 0.25276   | 0.009118 | 145027856 | 145028891 | 145109552 | 14510990  |
| 33 | NAO7048 | [2515685 chr1 | 1 | 145386725 | 145399341 | 12617  | 29  | 0.33375   | 0.023821 | 145385828 | 145387623 | 145399181 | 14539950  |
| 34 | NAO7048 | [2515685 chr1 | 1 | 145548753 | 145561369 | 12617  | 28  | 0.329542  | 0.024108 | 145547856 | 145549650 | 145561209 | 145561531 |
| 35 | NAO7048 | [2515685 chr1 | 1 | 145819213 | 145839481 | 20269  | 23  | 0.376471  | 0.031278 | 145819164 | 145819262 | 145839093 | 14583986  |
| 36 | NAO7048 | [2515685 chr1 | 1 | 145929568 | 145951531 | 21964  | 26  | 0.437215  | 0.02893  | 145929405 | 145929732 | 145951467 | 14595159  |
| 37 | NAO7048 | [2515685 chr1 | 1 | 146329066 | 146341312 | 12247  | 39  | 0.374346  | 0.020472 | 146329062 | 146329070 | 146341156 | 14634146  |
| 38 | NAO7048 | [2515685 chr1 | 1 | 146391020 | 146392019 | 1000   | 3   | 0.5297    | 0.080421 | 146390812 | 146391228 | 146391724 | 14639231  |
| 39 | NAO7048 | [2515685 chr1 | 1 | 146458878 | 146460097 | 1220   | 2   | 0.814653  | 0.10559  | 146457879 | 146459877 | 146459894 | 14646030  |
| 40 | NAO7048 | [2515685 chr1 | 1 | 146808546 | 146809451 | 906    | 2   | -0.585688 | 0.106331 | 146808090 | 146809003 | 146809142 | 14680976  |
| 41 | NAO7048 | [2515685 chr1 | 1 | 148998878 | 149005918 | 7041   | 13  | 0.85811   | 0.035231 | 148998401 | 148999355 | 149004680 | 14900715  |
| 42 | NAO7048 | [2515685 chr1 | 1 | 149368571 | 149385742 | 17172  | 3   | -0.878842 | 0.0902   | 149368105 | 149369038 | 149385339 | 14938614  |
| 43 | NAO7048 | [2515685 chr1 | 1 | 149385742 | 149399435 | 13694  | 19  | -2.617327 | 0.059612 | 149385339 | 149386145 | 149399080 | 14939979  |
| 44 | NAO7048 | [2515685 chr1 | 1 | 193443495 | 193552515 | 109021 | 93  | 0.489484  | 0.015442 | 193443280 | 193443710 | 193551981 | 193553051 |
| 45 | NAO7048 | [2515685 chr1 | 1 | 193613006 | 193650443 | 37438  | 34  | 0.253608  | 0.024653 | 193612773 | 193613239 | 193650245 | 19365064  |
| 46 | NAO7048 | [2515685 chr1 | 1 | 203245415 | 203247868 | 2454   | 2   | 0.888196  | 0.116217 | 203245018 | 203245812 | 203247578 | 203248151 |
| 47 | NAO7048 | [2515685 chr1 | 1 | 231219104 | 231261534 | 42431  | 48  | -0.259822 | 0.021112 | 231218806 | 231219402 | 231261238 | 231261831 |
| 48 | NAO7048 | [2515685 chr1 | 1 | 244850108 | 244851538 | 1431   | 2   | 0.598451  | 0.110145 | 244849536 | 244850681 | 244851004 | 244852071 |
| 49 | NAO7048 | [2515685 chr1 | 1 | 244872415 | 244874098 | 1684   | 5   | 0.452114  | 0.071882 | 244872245 | 244872585 | 244873799 | 244874391 |
| 50 | NAO7048 | [2515685 chr2 | 2 | 388500    | 390704    | 2205   | 6   | 0.463423  | 0.060827 | 387915    | 389086    | 390173    | 391236    |
| 51 | NAO7048 | [2515685 chr2 | 2 | 6280657   | 6286347   | 5691   | 2   | 0.545706  | 0.103119 | 6279100   | 6282214   | 6284835   | 6287851   |
| 52 | NAO7048 | [2515685 chr2 | 2 | 13531646  | 13548027  | 16382  | 16  | 0.297478  | 0.034876 | 13530427  | 13532866  | 13547735  | 13548311  |
| 53 | NAO7048 | [2515685 chr2 | 2 | 14655028  | 14661201  | 6174   | 7   | -0.966544 | 0.070358 | 14654325  | 14655732  | 14660595  | 14661801  |
| 54 | NAO7048 | [2515685 chr2 | 2 | 34612227  | 34613870  | 1644   | 3   | 0.571944  | 0.110482 | 34612072  | 34612383  | 34613659  | 34614081  |
| 55 | NAO7048 | [2515685 chr2 | 2 | 35896475  | 35905934  | 9460   | 3   | -0.869837 | 0.083844 | 35879425  | 35899430  | 35902979  | 35909821  |
| 56 | NAO7048 | [2515685 chr2 | 2 | 37869648  | 37911473  | 41826  | 43  | 0.576915  | 0.021822 | 37869077  | 37870220  | 37911214  | 37911731  |
| 57 | NAO7048 | [2515685 chr2 | 2 | 56563622  | 56567381  | 3760   | 2   | 3.649949  | 0.224618 | 56565559  | 56566577  | 56567035  | 56567721  |
| 58 | NAO7048 | [2515685 chr2 | 2 | 61675589  | 61676777  | 1189   | 2   | 1.983146  | 0.156412 | 61675200  | 61675979  | 61676468  | 61677081  |
| 59 | NAO7048 | [2515685 chr2 | 2 | 73923894  | 73946528  | 22635  | 35  | -0.506348 | 0.019722 | 73923593  | 73924195  | 73946333  | 73946721  |
| 60 | NAO7048 | [2515685 chr2 | 2 | 87168850  | 87191453  | 22604  | 35  | 0.28845   | 0.023186 | 87167299  | 87170401  | 87191208  | 87191691  |
| 61 | NAO7048 | [2515685 chr2 | 2 | 87256990  | 87487176  | 230187 | 271 | 0.323341  | 0.005135 | 87256381  | 87257599  | 87487079  | 87487271  |
| 62 | NAO7048 | [2515685 chr2 | 2 | 87497574  | 87810218  | 312645 | 406 | 0.323341  | 0.005135 | 87496929  | 87498220  | 87809943  | 87810491  |
| 63 | NAO7048 | [2515685 chr2 | 2 | 87814242  | 87878634  | 64393  | 83  | 0.323341  | 0.005135 | 87813841  | 87814644  | 87877080  | 87880181  |

|     |         |               |   |           |           |        |     |           |          |           |           |           |           |
|-----|---------|---------------|---|-----------|-----------|--------|-----|-----------|----------|-----------|-----------|-----------|-----------|
| 64  | NAO7048 | [2515685 chr2 | 2 | 88117636  | 88120146  | 2511   | 3   | 0.429661  | 0.082234 | 88116083  | 88119190  | 88119849  | 8812044-  |
| 65  | NAO7048 | [2515685 chr2 | 2 | 88121895  | 88125321  | 3427   | 6   | 0.356709  | 0.065529 | 88121607  | 88122184  | 88124765  | 8812587!  |
| 66  | NAO7048 | [2515685 chr2 | 2 | 91340084  | 91345425  | 5342   | 10  | 0.317656  | 0.046441 | 91339909  | 91340260  | 91344992  | 9134585!  |
| 67  | NAO7048 | [2515685 chr2 | 2 | 94985753  | 94989110  | 3358   | 5   | -0.360726 | 0.063666 | 94984352  | 94987154  | 94988745  | 9498947!  |
| 68  | NAO7048 | [2515685 chr2 | 2 | 97184386  | 97189737  | 5352   | 2   | -0.8215   | 0.106175 | 97182781  | 97185992  | 97186782  | 9719672:  |
| 69  | NAO7048 | [2515685 chr2 | 2 | 97281294  | 97297647  | 16354  | 26  | -0.251927 | 0.027387 | 97281091  | 97281497  | 97297385  | 9729791!  |
| 70  | NAO7048 | [2515685 chr2 | 2 | 97325981  | 97339161  | 13181  | 23  | 0.303313  | 0.029768 | 97321432  | 97328936  | 97338784  | 9733953!  |
| 71  | NAO7048 | [2515685 chr2 | 2 | 97580627  | 97603110  | 22484  | 26  | 0.289837  | 0.028575 | 97580250  | 97581005  | 97600155  | 9760660!  |
| 72  | NAO7048 | [2515685 chr2 | 2 | 97613796  | 97614932  | 1137   | 2   | 1.757626  | 0.141944 | 97613553  | 97614040  | 97614467  | 9761539!  |
| 73  | NAO7048 | [2515685 chr2 | 2 | 105806072 | 105811462 | 5391   | 6   | -1.024355 | 0.059525 | 105805693 | 105806451 | 105810848 | 10581207  |
| 74  | NAO7048 | [2515685 chr2 | 2 | 108313968 | 108314875 | 908    | 2   | -1.376645 | 0.136093 | 108313664 | 108314272 | 108314680 | 10831507  |
| 75  | NAO7048 | [2515685 chr2 | 2 | 111696774 | 111699147 | 2374   | 16  | 0.267271  | 0.005167 | 111696413 | 111697136 | 111698899 | 11169939  |
| 76  | NAO7048 | [2515685 chr2 | 2 | 111727415 | 111749276 | 21862  | 31  | 0.267271  | 0.005167 | 111725931 | 111728900 | 111748875 | 11174967. |
| 77  | NAO7048 | [2515685 chr2 | 2 | 111753695 | 112090744 | 337050 | 455 | 0.267271  | 0.005167 | 111753027 | 111754363 | 112090496 | 11209099  |
| 78  | NAO7048 | [2515685 chr2 | 2 | 112193881 | 112320429 | 126549 | 156 | 0.267271  | 0.005167 | 112193410 | 112194352 | 112319833 | 11232102  |
| 79  | NAO7048 | [2515685 chr2 | 2 | 126159437 | 126168349 | 8913   | 3   | -2.890203 | 0.136687 | 126158494 | 126160381 | 126168048 | 12616865  |
| 80  | NAO7048 | [2515685 chr2 | 2 | 130420955 | 130452105 | 31151  | 30  | -0.292103 | 0.026559 | 130420630 | 130421281 | 130451558 | 13045265  |
| 81  | NAO7048 | [2515685 chr2 | 2 | 130754655 | 130755623 | 969    | 2   | -0.59995  | 0.096705 | 130754437 | 130754874 | 130755330 | 13075591  |
| 82  | NAO7048 | [2515685 chr2 | 2 | 131856533 | 131867908 | 11376  | 23  | -0.280043 | 0.028216 | 131856494 | 131856572 | 131867498 | 13186831. |
| 83  | NAO7048 | [2515685 chr2 | 2 | 132334309 | 132340886 | 6578   | 5   | -0.349381 | 0.063914 | 132333497 | 132335122 | 132340628 | 13234114  |
| 84  | NAO7048 | [2515685 chr2 | 2 | 132871605 | 132873051 | 1447   | 2   | 1.473529  | 0.143885 | 132871306 | 132871904 | 132872791 | 13287331. |
| 85  | NAO7048 | [2515685 chr2 | 2 | 146694143 | 146710744 | 16602  | 17  | -2.644348 | 0.070387 | 146688620 | 146697098 | 146710557 | 14671093  |
| 86  | NAO7048 | [2515685 chr2 | 2 | 153495548 | 153499409 | 3862   | 2   | 0.880449  | 0.125042 | 153484545 | 153498503 | 153498846 | 15349997  |
| 87  | NAO7048 | [2515685 chr2 | 2 | 153622711 | 153625256 | 2546   | 3   | 1.001708  | 0.091135 | 153621175 | 153624247 | 153625088 | 15362542. |
| 88  | NAO7048 | [2515685 chr2 | 2 | 208176479 | 208184457 | 7979   | 7   | 0.899278  | 0.058747 | 208176093 | 208176865 | 208183930 | 20818498  |
| 89  | NAO7048 | [2515685 chr2 | 2 | 232512469 | 232537143 | 24675  | 6   | -0.359691 | 0.049189 | 232511142 | 232513796 | 232534243 | 23254004  |
| 90  | NAO7048 | [2515685 chr2 | 2 | 242430340 | 242432140 | 1801   | 2   | -0.608988 | 0.118511 | 242430091 | 242430589 | 242431346 | 24243293  |
| 91  | NAO7048 | [2515685 chr2 | 2 | 242477094 | 242478812 | 1719   | 3   | -0.443836 | 0.076669 | 242476947 | 242477241 | 242478692 | 24247893  |
| 92  | NAO7048 | [2515685 chr2 | 2 | 242634934 | 242664580 | 29647  | 57  | -0.631744 | 0.019716 | 242633903 | 242635966 | 242664284 | 24266487  |
| 93  | NAO7048 | [2515685 chr2 | 2 | 242664580 | 242668929 | 4350   | 10  | 1.176578  | 0.041785 | 242664284 | 242664877 | 242668532 | 24266932  |
| 94  | NAO7048 | [2515685 chr3 | 3 | 204650    | 209394    | 4745   | 4   | 0.88255   | 0.072541 | 202918    | 206383    | 209009    | 209775    |
| 95  | NAO7048 | [2515685 chr3 | 3 | 1757211   | 1765705   | 8495   | 2   | 0.813627  | 0.114754 | 1756096   | 1758327   | 1762058   | 179730!   |
| 96  | NAO7048 | [2515685 chr3 | 3 | 50888459  | 50888513  | 55     | 2   | 1.103265  | 0.121885 | 50888445  | 50888474  | 50888495  | 5088853!  |
| 97  | NAO7048 | [2515685 chr3 | 3 | 65163800  | 65190177  | 26378  | 25  | -0.876493 | 0.032387 | 65163123  | 65164477  | 65189774  | 6519058   |
| 98  | NAO7048 | [2515685 chr3 | 3 | 68821474  | 68830847  | 9374   | 17  | 0.87081   | 0.037222 | 68818894  | 68824055  | 68830417  | 6883127.  |
| 99  | NAO7048 | [2515685 chr3 | 3 | 100426489 | 100432540 | 6052   | 6   | -4.696827 | 0.143315 | 100426149 | 100426829 | 100431494 | 10043358  |
| 100 | NAO7048 | [2515685 chr3 | 3 | 105760262 | 105762355 | 2094   | 2   | -3.933533 | 0.23252  | 105759634 | 105760890 | 105761424 | 10576328  |
| 101 | NAO7048 | [2515685 chr3 | 3 | 107702626 | 107705435 | 2810   | 4   | 0.372419  | 0.07224  | 107702453 | 107702799 | 107704855 | 10770601  |
| 102 | NAO7048 | [2515685 chr3 | 3 | 126446665 | 126837778 | 391114 | 5   | 0.289802  | 0.055342 | 126274942 | 126450312 | 126834131 | 12690530  |
| 103 | NAO7048 | [2515685 chr3 | 3 | 133191392 | 133196576 | 5185   | 5   | -2.928329 | 0.105879 | 133190820 | 133191965 | 133195824 | 13319732. |
| 104 | NAO7048 | [2515685 chr3 | 3 | 163994592 | 164106273 | 111682 | 105 | 2.349536  | 0.025592 | 163993392 | 163995793 | 164106029 | 16410651  |
| 105 | NAO7048 | [2515685 chr3 | 3 | 164200660 | 164205886 | 5227   | 5   | -0.79211  | 0.079183 | 164200187 | 164201133 | 164204674 | 16420709  |
| 106 | NAO7048 | [2515685 chr3 | 3 | 166608129 | 166610587 | 2459   | 3   | 0.424553  | 0.069623 | 166607897 | 166608362 | 166610320 | 16661085  |
| 107 | NAO7048 | [2515685 chr3 | 3 | 178776474 | 178780177 | 3704   | 5   | -0.625614 | 0.076078 | 178775706 | 178777243 | 178779683 | 17878067  |
| 108 | NAO7048 | [2515685 chr3 | 3 | 192547312 | 192554331 | 7020   | 10  | 0.88398   | 0.05219  | 192546950 | 192547674 | 192554127 | 19255453  |
| 109 | NAO7048 | [2515685 chr3 | 3 | 196909425 | 196938361 | 28937  | 24  | 0.42381   | 0.030078 | 196909131 | 196909720 | 196937706 | 19693901  |
| 110 | NAO7048 | [2515685 chr3 | 3 | 196949721 | 196958848 | 9128   | 8   | 0.438378  | 0.051255 | 196949147 | 196950296 | 196956437 | 19696126  |
| 111 | NAO7048 | [2515685 chr3 | 3 | 196994475 | 197002965 | 8491   | 10  | 0.6206    | 0.045061 | 196994054 | 196994896 | 197002044 | 19700388  |
| 112 | NAO7048 | [2515685 chr3 | 3 | 198674426 | 198675470 | 1045   | 6   | -0.603473 | 0.047303 | 198674161 | 198674692 | 198674903 | 19867603. |
| 113 | NAO7048 | [2515685 chr3 | 3 | 199218619 | 199221999 | 3381   | 12  | -0.574736 | 0.048164 | 199218354 | 199218884 | 199220440 | 19922355  |
| 114 | NAO7048 | [2515685 chr3 | 3 | 199221999 | 199231181 | 9183   | 7   | 0.264036  | 0.050594 | 199220440 | 199223558 | 199230864 | 19923149  |
| 115 | NAO7048 | [2515685 chr3 | 3 | 199313925 | 199321063 | 7139   | 15  | 1.159904  | 0.035089 | 199313515 | 199314336 | 199320844 | 19932128  |
| 116 | NAO7048 | [2515685 chr4 | 4 | 639659    | 640828    | 1170   | 2   | 0.766878  | 0.125259 | 639291    | 640028    | 640478    | 641178    |
| 117 | NAO7048 | [2515685 chr4 | 4 | 728045    | 731845    | 3801   | 2   | 0.615432  | 0.105591 | 727736    | 728355    | 731532    | 732155    |
| 118 | NAO7048 | [2515685 chr4 | 4 | 3862707   | 3868612   | 5906   | 6   | -0.336407 | 0.057112 | 3862376   | 3863039   | 3868314   | 3868917   |

|     |         |               |   |           |           |        |     |           |          |           |           |           |          |
|-----|---------|---------------|---|-----------|-----------|--------|-----|-----------|----------|-----------|-----------|-----------|----------|
| 119 | NA07048 | [2515685 chr4 | 4 | 6736291   | 6739261   | 2971   | 2   | -1.023527 | 0.093031 | 6735228   | 6737354   | 6738529   | 6739994  |
| 120 | NA07048 | [2515685 chr4 | 4 | 8740317   | 8756949   | 16633  | 25  | 0.901995  | 0.024404 | 8740049   | 8740586   | 8756813   | 8757086  |
| 121 | NA07048 | [2515685 chr4 | 4 | 8998178   | 9046719   | 48542  | 87  | 0.835661  | 0.012926 | 8850774   | 9001243   | 9046129   | 9047309  |
| 122 | NA07048 | [2515685 chr4 | 4 | 9812346   | 9813108   | 763    | 33  | 0.506928  | 0.020012 | 9812284   | 9812408   | 9812952   | 9813261  |
| 123 | NA07048 | [2515685 chr4 | 4 | 9887220   | 9911397   | 24178  | 31  | 1.964404  | 0.041999 | 9886886   | 9887555   | 9910388   | 9912407  |
| 124 | NA07048 | [2515685 chr4 | 4 | 21618854  | 21620124  | 1271   | 2   | -0.478783 | 0.093069 | 21618458  | 21619251  | 21619821  | 21620427 |
| 125 | NA07048 | [2515685 chr4 | 4 | 21723642  | 21730849  | 7208   | 4   | -0.396561 | 0.077769 | 21723295  | 21723990  | 21730465  | 21731233 |
| 126 | NA07048 | [2515685 chr4 | 4 | 40593181  | 40613706  | 20526  | 3   | 0.453242  | 0.089436 | 40590540  | 40595822  | 40610641  | 40682427 |
| 127 | NA07048 | [2515685 chr4 | 4 | 49040171  | 49080998  | 40828  | 71  | -0.267943 | 0.017028 | 49032998  | 49043236  | 49080923  | 49081077 |
| 128 | NA07048 | [2515685 chr4 | 4 | 56389767  | 56588135  | 198369 | 2   | -0.54607  | 0.095167 | 56177874  | 56392832  | 56585070  | 56682061 |
| 129 | NA07048 | [2515685 chr4 | 4 | 63500375  | 63504889  | 4515   | 5   | -0.991067 | 0.079222 | 63494261  | 63503440  | 63504639  | 63505146 |
| 130 | NA07048 | [2515685 chr4 | 4 | 69203228  | 69319814  | 116587 | 70  | 1.178907  | 0.023525 | 69202934  | 69203523  | 69319569  | 69320051 |
| 131 | NA07048 | [2515685 chr4 | 4 | 69319814  | 69365270  | 45457  | 44  | 0.348613  | 0.019009 | 69319569  | 69320059  | 69365129  | 69365417 |
| 132 | NA07048 | [2515685 chr4 | 4 | 69672033  | 69717280  | 45248  | 52  | 0.323295  | 0.018014 | 69671975  | 69672092  | 69717139  | 69717427 |
| 133 | NA07048 | [2515685 chr4 | 4 | 70329154  | 70418275  | 89122  | 85  | 0.534164  | 0.016649 | 70328934  | 70329375  | 70418083  | 70418467 |
| 134 | NA07048 | [2515685 chr4 | 4 | 115534211 | 115541546 | 7336   | 9   | -3.218237 | 0.103057 | 115530015 | 115537276 | 115539984 | 11554310 |
| 135 | NA07048 | [2515685 chr4 | 4 | 119480821 | 119487782 | 6962   | 5   | -0.870433 | 0.068369 | 119473487 | 119483886 | 119487418 | 11948814 |
| 136 | NA07048 | [2515685 chr4 | 4 | 133000684 | 133046353 | 45670  | 26  | -0.290692 | 0.023908 | 132999479 | 133001890 | 133046048 | 13304665 |
| 137 | NA07048 | [2515685 chr4 | 4 | 133328951 | 133330551 | 1601   | 2   | -0.739805 | 0.116999 | 133328344 | 133329558 | 133330281 | 13333082 |
| 138 | NA07048 | [2515685 chr4 | 4 | 133606816 | 133614693 | 7878   | 13  | -0.261525 | 0.041111 | 133606442 | 133607191 | 133614285 | 13361510 |
| 139 | NA07048 | [2515685 chr4 | 4 | 138537751 | 138549906 | 12156  | 14  | 0.989468  | 0.045839 | 138537443 | 138538059 | 138547414 | 13855239 |
| 140 | NA07048 | [2515685 chr4 | 4 | 145241837 | 145244071 | 2235   | 2   | -1.003662 | 0.131611 | 145241488 | 145242187 | 145242951 | 14524519 |
| 141 | NA07048 | [2515685 chr4 | 4 | 161416890 | 161418626 | 1737   | 2   | 0.529399  | 0.09872  | 161416557 | 161417224 | 161418417 | 16141883 |
| 142 | NA07048 | [2515685 chr4 | 4 | 162237272 | 162242562 | 5291   | 8   | 1.02716   | 0.054688 | 162236487 | 162238058 | 162242381 | 16224274 |
| 143 | NA07048 | [2515685 chr4 | 4 | 162806038 | 162809269 | 3232   | 3   | 1.030531  | 0.084537 | 162804872 | 162807204 | 162808734 | 16280980 |
| 144 | NA07048 | [2515685 chr4 | 4 | 169184442 | 169368370 | 183929 | 161 | 0.828674  | 0.012341 | 169184090 | 169184794 | 169366713 | 16937002 |
| 145 | NA07048 | [2515685 chr4 | 4 | 172750241 | 172755216 | 4976   | 2   | -3.985812 | 0.300393 | 172748887 | 172751596 | 172753256 | 17275717 |
| 146 | NA07048 | [2515685 chr4 | 4 | 173363594 | 173367718 | 4125   | 6   | -3.584475 | 0.120001 | 173362583 | 173364606 | 173367283 | 17336815 |
| 147 | NA07048 | [2515685 chr4 | 4 | 173799832 | 173807320 | 7489   | 6   | -3.367574 | 0.139691 | 173799464 | 173800201 | 173804255 | 17381134 |
| 148 | NA07048 | [2515685 chr4 | 4 | 185533276 | 185544849 | 11574  | 12  | 0.8867    | 0.04673  | 185532696 | 185533857 | 185543276 | 18554642 |
| 149 | NA07048 | [2515685 chr4 | 4 | 187728494 | 187732907 | 4414   | 15  | 2.123697  | 0.053523 | 187728193 | 187728795 | 187732541 | 18773327 |
| 150 | NA07048 | [2515685 chr4 | 4 | 188255523 | 188269680 | 14158  | 235 | 0.632035  | 0.00886  | 188255215 | 188255831 | 188269403 | 18826995 |
| 151 | NA07048 | [2515685 chr4 | 4 | 190528602 | 190533163 | 4562   | 21  | -0.691738 | 0.033341 | 190528058 | 190529146 | 190531664 | 19053466 |
| 152 | NA07048 | [2515685 chr4 | 4 | 190568762 | 190572547 | 3786   | 7   | -0.273911 | 0.05271  | 190568557 | 190568968 | 190572211 | 19057288 |
| 153 | NA07048 | [2515685 chr4 | 4 | 190845771 | 191052394 | 206624 | 211 | 0.281844  | 0.009929 | 190845056 | 190846486 | 191051776 | 19105301 |
| 154 | NA07048 | [2515685 chr5 | 5 | 104264    | 105617    | 1354   | 2   | 0.750113  | 0.112374 | 104036    | 104493    | 105236    | 105995   |
| 155 | NA07048 | [2515685 chr5 | 5 | 261631    | 263283    | 1653   | 9   | 0.389997  | 0.053039 | 261032    | 262230    | 262766    | 263801   |
| 156 | NA07048 | [2515685 chr5 | 5 | 520743    | 521684    | 942    | 5   | 0.808771  | 0.073326 | 520428    | 521059    | 521427    | 521942   |
| 157 | NA07048 | [2515685 chr5 | 5 | 743980    | 831951    | 87972  | 77  | 0.284446  | 0.01195  | 743336    | 744625    | 831222    | 832681   |
| 158 | NA07048 | [2515685 chr5 | 5 | 836032    | 869036    | 33005  | 27  | 0.284446  | 0.01195  | 835395    | 836669    | 867979    | 870095   |
| 159 | NA07048 | [2515685 chr5 | 5 | 877395    | 901723    | 24329  | 23  | 0.284446  | 0.01195  | 877140    | 877651    | 901319    | 902127   |
| 160 | NA07048 | [2515685 chr5 | 5 | 948969    | 953016    | 4048   | 13  | 0.396661  | 0.032445 | 948182    | 949756    | 952851    | 953182   |
| 161 | NA07048 | [2515685 chr5 | 5 | 1223248   | 1223930   | 683    | 5   | 1.473122  | 0.06593  | 1223057   | 1223439   | 1223854   | 1224007  |
| 162 | NA07048 | [2515685 chr5 | 5 | 12863961  | 12873512  | 9552   | 14  | -0.855253 | 0.045167 | 12863778  | 12864144  | 12873198  | 12873827 |
| 163 | NA07048 | [2515685 chr5 | 5 | 15772455  | 15773947  | 1493   | 2   | -0.762625 | 0.117436 | 15772037  | 15772874  | 15773551  | 15774334 |
| 164 | NA07048 | [2515685 chr5 | 5 | 21539354  | 21556393  | 17040  | 34  | 0.281758  | 0.022551 | 21538825  | 21539883  | 21556081  | 21556701 |
| 165 | NA07048 | [2515685 chr5 | 5 | 26831997  | 26837938  | 5942   | 6   | 0.686772  | 0.063717 | 26829858  | 26834136  | 26837469  | 26838401 |
| 166 | NA07048 | [2515685 chr5 | 5 | 69006269  | 69007115  | 847    | 3   | 0.478738  | 0.066373 | 69005928  | 69006611  | 69007055  | 69007171 |
| 167 | NA07048 | [2515685 chr5 | 5 | 69254509  | 69309060  | 54552  | 108 | 0.274292  | 0.005852 | 69254301  | 69254717  | 69308952  | 69309161 |
| 168 | NA07048 | [2515685 chr5 | 5 | 69312166  | 69469180  | 157015 | 217 | 0.274292  | 0.005852 | 69312092  | 69312240  | 69469105  | 69469251 |
| 169 | NA07048 | [2515685 chr5 | 5 | 69472287  | 69526776  | 54490  | 114 | 0.274292  | 0.005852 | 69472178  | 69472396  | 69526569  | 69526984 |
| 170 | NA07048 | [2515685 chr5 | 5 | 69583053  | 69586852  | 3800   | 9   | 0.371583  | 0.039373 | 69582615  | 69583492  | 69586792  | 69586917 |
| 171 | NA07048 | [2515685 chr5 | 5 | 69959583  | 69977193  | 17611  | 48  | 0.304013  | 0.01766  | 69959197  | 69959969  | 69977060  | 69977321 |
| 172 | NA07048 | [2515685 chr5 | 5 | 70129558  | 70184131  | 54574  | 95  | 0.268295  | 0.008892 | 70129350  | 70129766  | 70184023  | 70184241 |
| 173 | NA07048 | [2515685 chr5 | 5 | 70187238  | 70254947  | 67710  | 92  | 0.268295  | 0.008892 | 70187163  | 70187313  | 70254593  | 70255307 |

|     |         |               |   |           |           |        |     |           |          |           |           |           |           |
|-----|---------|---------------|---|-----------|-----------|--------|-----|-----------|----------|-----------|-----------|-----------|-----------|
| 174 | NA07048 | [2515685 chr5 | 5 | 70263808  | 70290648  | 26841  | 28  | 0.449702  | 0.022427 | 70261863  | 70265753  | 70287456  | 70294911  |
| 175 | NA07048 | [2515685 chr5 | 5 | 70462208  | 70464475  | 2268   | 6   | 0.423965  | 0.053591 | 70462032  | 70462385  | 70464318  | 7046463:  |
| 176 | NA07048 | [2515685 chr5 | 5 | 70472601  | 70527166  | 54566  | 104 | 0.295058  | 0.011975 | 70472492  | 70472710  | 70526959  | 7052737-  |
| 177 | NA07048 | [2515685 chr5 | 5 | 70663536  | 70676139  | 12604  | 33  | 0.292087  | 0.020893 | 70663150  | 70663922  | 70676085  | 7067619-  |
| 178 | NA07048 | [2515685 chr5 | 5 | 81459213  | 81466055  | 6843   | 2   | -1.374995 | 0.122256 | 81455614  | 81462405  | 81462863  | 8147028!  |
| 179 | NA07048 | [2515685 chr5 | 5 | 93928460  | 93933101  | 4642   | 4   | -0.489127 | 0.077784 | 93927706  | 93929215  | 93931984  | 9393421!  |
| 180 | NA07048 | [2515685 chr5 | 5 | 97427204  | 97428353  | 1150   | 2   | 1.013859  | 0.115467 | 97426913  | 97427496  | 97428177  | 9742852!  |
| 181 | NA07048 | [2515685 chr5 | 5 | 98867127  | 98870861  | 3735   | 2   | -0.758176 | 0.127857 | 98864129  | 98870125  | 98870667  | 9887105!  |
| 182 | NA07048 | [2515685 chr5 | 5 | 99408801  | 99419037  | 10237  | 14  | -0.648656 | 0.040292 | 99408605  | 99408997  | 99418328  | 9941974!  |
| 183 | NA07048 | [2515685 chr5 | 5 | 122649189 | 122651412 | 2224   | 3   | 0.577079  | 0.088612 | 122648933 | 122649446 | 122650032 | 12265279  |
| 184 | NA07048 | [2515685 chr5 | 5 | 137835848 | 137844134 | 8287   | 7   | 0.639784  | 0.06129  | 137835611 | 137836085 | 137843310 | 13784495  |
| 185 | NA07048 | [2515685 chr5 | 5 | 140203081 | 140218928 | 15848  | 19  | 2.052326  | 0.052491 | 140202344 | 140203819 | 140218508 | 14021934  |
| 186 | NA07048 | [2515685 chr5 | 5 | 140534849 | 140540106 | 5258   | 5   | 1.703087  | 0.08188  | 140534700 | 140534999 | 140539007 | 14054120  |
| 187 | NA07048 | [2515685 chr5 | 5 | 140573248 | 140574568 | 1321   | 2   | 0.870973  | 0.116395 | 140573036 | 140573460 | 140574362 | 14057477  |
| 188 | NA07048 | [2515685 chr5 | 5 | 155408303 | 155424011 | 15709  | 11  | -0.897424 | 0.051014 | 155405622 | 155410984 | 155420819 | 15542761  |
| 189 | NA07048 | [2515685 chr5 | 5 | 175392637 | 175393797 | 1161   | 6   | -0.399946 | 0.064264 | 175392088 | 175393187 | 175393522 | 17539407  |
| 190 | NA07048 | [2515685 chr5 | 5 | 175496886 | 175508571 | 11686  | 13  | 0.258835  | 0.040738 | 175496602 | 175497170 | 175508077 | 17550906  |
| 191 | NA07048 | [2515685 chr5 | 5 | 178994494 | 178994971 | 478    | 2   | -0.590256 | 0.096152 | 178994223 | 178994766 | 178994768 | 17899517- |
| 192 | NA07048 | [2515685 chr5 | 5 | 179016786 | 179017263 | 478    | 2   | -0.590256 | 0.096152 | 179016582 | 179016990 | 179016992 | 17901753- |
| 193 | NA07048 | [2515685 chr5 | 5 | 180418059 | 180419113 | 1055   | 2   | 0.738404  | 0.123533 | 180417894 | 180418224 | 180418598 | 18041962- |
| 194 | NA07048 | [2515685 chr6 | 6 | 201823    | 327656    | 125834 | 129 | 0.411319  | 0.012663 | 201415    | 202232    | 326993    | 32832!    |
| 195 | NA07048 | [2515685 chr6 | 6 | 29958572  | 30011802  | 53231  | 50  | 0.436999  | 0.02182  | 29957670  | 29959474  | 30011083  | 3001252   |
| 196 | NA07048 | [2515685 chr6 | 6 | 31391558  | 31394296  | 2739   | 5   | 0.421815  | 0.070011 | 31391334  | 31391783  | 31394097  | 3139449!  |
| 197 | NA07048 | [2515685 chr6 | 6 | 32056890  | 32121527  | 64638  | 79  | -0.339893 | 0.014374 | 32056644  | 32057137  | 32121053  | 3212200-  |
| 198 | NA07048 | [2515685 chr6 | 6 | 32561866  | 32588178  | 26313  | 8   | 0.463952  | 0.012084 | 32560230  | 32563503  | 32588033  | 3258832-  |
| 199 | NA07048 | [2515685 chr6 | 6 | 32591649  | 32603035  | 11387  | 18  | 0.463952  | 0.012084 | 32591403  | 32591896  | 32601735  | 3260433!  |
| 200 | NA07048 | [2515685 chr6 | 6 | 32612720  | 32744343  | 131624 | 131 | 0.463952  | 0.012084 | 32611897  | 32613543  | 32744136  | 3274455!  |
| 201 | NA07048 | [2515685 chr6 | 6 | 35862833  | 35879904  | 17072  | 16  | 0.387691  | 0.036485 | 35862530  | 35863136  | 35879292  | 3588051-  |
| 202 | NA07048 | [2515685 chr6 | 6 | 63656044  | 63658372  | 2329   | 3   | -0.437599 | 0.080588 | 63655444  | 63656644  | 63658061  | 6365868!  |
| 203 | NA07048 | [2515685 chr6 | 6 | 66455162  | 66461833  | 6672   | 5   | -0.893241 | 0.079411 | 66454046  | 66456278  | 66461410  | 6646225-  |
| 204 | NA07048 | [2515685 chr6 | 6 | 79023318  | 79093263  | 69946  | 70  | 0.826099  | 0.018535 | 79022028  | 79024609  | 79091909  | 7909461!  |
| 205 | NA07048 | [2515685 chr6 | 6 | 81338145  | 81350271  | 12127  | 11  | -0.808842 | 0.047035 | 81334276  | 81341647  | 81350013  | 8135053!  |
| 206 | NA07048 | [2515685 chr6 | 6 | 103844685 | 103871201 | 26517  | 17  | 2.229553  | 0.061939 | 103844347 | 103845023 | 103868241 | 10387416  |
| 207 | NA07048 | [2515685 chr6 | 6 | 120671191 | 120671916 | 726    | 2   | 0.849773  | 0.103487 | 120670696 | 120671686 | 120671725 | 12067210  |
| 208 | NA07048 | [2515685 chr6 | 6 | 149930909 | 149932207 | 1299   | 2   | 0.596787  | 0.116994 | 149930666 | 149931153 | 149931611 | 14993280  |
| 209 | NA07048 | [2515685 chr6 | 6 | 150064828 | 150066126 | 1299   | 2   | 0.596794  | 0.116995 | 150064585 | 150065072 | 150065530 | 15006672  |
| 210 | NA07048 | [2515685 chr6 | 6 | 160997684 | 161038394 | 40711  | 67  | 0.285641  | 0.014764 | 160997465 | 160997903 | 161038184 | 16103860  |
| 211 | NA07048 | [2515685 chr6 | 6 | 162893670 | 162896314 | 2645   | 3   | -0.408838 | 0.081226 | 162893373 | 162893968 | 162895355 | 16289727  |
| 212 | NA07048 | [2515685 chr6 | 6 | 170603879 | 170604666 | 788    | 2   | -2.633923 | 0.149696 | 170603541 | 170604217 | 170604339 | 17060499- |
| 213 | NA07048 | [2515685 chr6 | 6 | 170625506 | 170627028 | 1523   | 3   | 1.424282  | 0.114424 | 170625015 | 170625997 | 170626579 | 17062747- |
| 214 | NA07048 | [2515685 chr6 | 6 | 170684555 | 170687261 | 2707   | 6   | -0.696055 | 0.061644 | 170684170 | 170684940 | 170686870 | 17068765  |
| 215 | NA07048 | [2515685 chr6 | 6 | 170692529 | 170694780 | 2252   | 13  | 0.252868  | 0.036181 | 170692183 | 170692876 | 170694493 | 17069506  |
| 216 | NA07048 | [2515685 chr7 | 7 | 113212    | 116134    | 2923   | 12  | -0.252512 | 0.046308 | 113146    | 113279    | 115995    | 116273    |
| 217 | NA07048 | [2515685 chr7 | 7 | 135982    | 164196    | 28215  | 29  | 0.374318  | 0.027516 | 135556    | 136408    | 163674    | 164718    |
| 218 | NA07048 | [2515685 chr7 | 7 | 929017    | 930663    | 1647   | 5   | 0.482262  | 0.066443 | 928626    | 929408    | 930382    | 930945    |
| 219 | NA07048 | [2515685 chr7 | 7 | 1084125   | 1086660   | 2536   | 15  | 0.551965  | 0.037688 | 1083752   | 1084499   | 1085871   | 1087445   |
| 220 | NA07048 | [2515685 chr7 | 7 | 3384111   | 3392458   | 8348   | 8   | 0.901939  | 0.057211 | 3383451   | 3384772   | 3390107   | 339561!   |
| 221 | NA07048 | [2515685 chr7 | 7 | 13361202  | 13364740  | 3539   | 2   | -0.74492  | 0.106041 | 13358757  | 13363553  | 13364363  | 1336511-  |
| 222 | NA07048 | [2515685 chr7 | 7 | 38062494  | 38071843  | 9350   | 10  | 0.476227  | 0.048097 | 38061977  | 38063012  | 38071423  | 3807226-  |
| 223 | NA07048 | [2515685 chr7 | 7 | 57512425  | 57524163  | 11739  | 13  | -0.322093 | 0.041494 | 57512005  | 57512846  | 57523428  | 5752489!  |
| 224 | NA07048 | [2515685 chr7 | 7 | 62254472  | 62255088  | 617    | 4   | 0.781265  | 0.076134 | 62254309  | 62254635  | 62254924  | 6225525-  |
| 225 | NA07048 | [2515685 chr7 | 7 | 62302079  | 62302696  | 618    | 4   | 0.781265  | 0.076134 | 62301915  | 62302243  | 62302533  | 6230285!  |
| 226 | NA07048 | [2515685 chr7 | 7 | 69869623  | 69871056  | 1434   | 2   | 3.081968  | 0.16703  | 69869269  | 69869978  | 69870420  | 6987169-  |
| 227 | NA07048 | [2515685 chr7 | 7 | 71858493  | 71859326  | 834    | 2   | -0.468763 | 0.086022 | 71858284  | 71858703  | 71858719  | 7185993-  |
| 228 | NA07048 | [2515685 chr7 | 7 | 72014016  | 72014871  | 856    | 3   | 0.836261  | 0.074844 | 72013991  | 72014042  | 72014598  | 7201514-  |



|     |         |               |   |           |           |       |    |           |          |           |           |           |          |
|-----|---------|---------------|---|-----------|-----------|-------|----|-----------|----------|-----------|-----------|-----------|----------|
| 229 | NA07048 | [2515685 chr7 | 7 | 72156868  | 72157708  | 841   | 2  | -0.468763 | 0.086022 | 72156657  | 72157079  | 72157095  | 7215832  |
| 230 | NA07048 | [2515685 chr7 | 7 | 73823778  | 73824413  | 636   | 3  | 0.802897  | 0.080521 | 73823755  | 73823801  | 73824363  | 7382446  |
| 231 | NA07048 | [2515685 chr7 | 7 | 74096901  | 74097754  | 854   | 3  | 0.836265  | 0.074844 | 74096630  | 74097173  | 74097729  | 7409778  |
| 232 | NA07048 | [2515685 chr7 | 7 | 74511185  | 74511943  | 759   | 3  | 0.836262  | 0.074844 | 74511009  | 74511362  | 74511918  | 7451196  |
| 233 | NA07048 | [2515685 chr7 | 7 | 74695370  | 74696139  | 770   | 3  | -0.422653 | 0.075198 | 74695306  | 74695434  | 74695977  | 7469630  |
| 234 | NA07048 | [2515685 chr7 | 7 | 75790452  | 75794984  | 4533  | 5  | -0.727523 | 0.070697 | 75790248  | 75790656  | 75794325  | 7579564  |
| 235 | NA07048 | [2515685 chr7 | 7 | 76173835  | 76175647  | 1813  | 2  | 0.555955  | 0.099328 | 76173564  | 76174106  | 76174852  | 7617644  |
| 236 | NA07048 | [2515685 chr7 | 7 | 86311610  | 86326435  | 14826 | 4  | 0.404     | 0.064396 | 86310940  | 86312281  | 86325771  | 8632709  |
| 237 | NA07048 | [2515685 chr7 | 7 | 89455601  | 89456632  | 1032  | 2  | 4.118808  | 0.206284 | 89455373  | 89455830  | 89456225  | 8945703  |
| 238 | NA07048 | [2515685 chr7 | 7 | 99513362  | 99513912  | 551   | 2  | 0.788288  | 0.094009 | 99513133  | 99513592  | 99513623  | 9951420  |
| 239 | NA07048 | [2515685 chr7 | 7 | 100202927 | 100203955 | 1029  | 2  | 0.573629  | 0.111387 | 100202569 | 100203285 | 100203714 | 10020419 |
| 240 | NA07048 | [2515685 chr7 | 7 | 101739942 | 101746499 | 6558  | 7  | 0.320831  | 0.045606 | 101739929 | 101739956 | 101745864 | 10174713 |
| 241 | NA07048 | [2515685 chr7 | 7 | 101752166 | 101759251 | 7086  | 10 | 0.421684  | 0.038274 | 101751400 | 101752933 | 101759229 | 10175927 |
| 242 | NA07048 | [2515685 chr7 | 7 | 101768898 | 101770034 | 1137  | 2  | 0.432819  | 0.08129  | 101768621 | 101769176 | 101769652 | 10177041 |
| 243 | NA07048 | [2515685 chr7 | 7 | 101839168 | 101845706 | 6539  | 7  | 0.320831  | 0.045606 | 101839155 | 101839182 | 101845083 | 10184632 |
| 244 | NA07048 | [2515685 chr7 | 7 | 101851360 | 101858816 | 7457  | 10 | 0.421683  | 0.038274 | 101850594 | 101852127 | 101858540 | 10185909 |
| 245 | NA07048 | [2515685 chr7 | 7 | 101868236 | 101869373 | 1138  | 2  | 0.432819  | 0.08129  | 101867960 | 101868513 | 101868990 | 10186975 |
| 246 | NA07048 | [2515685 chr7 | 7 | 109034783 | 109048749 | 13967 | 10 | 1.798409  | 0.067305 | 109024063 | 109037134 | 109046953 | 10905054 |
| 247 | NA07048 | [2515685 chr7 | 7 | 109776378 | 109782655 | 6278  | 5  | 0.956266  | 0.075531 | 109775821 | 109776936 | 109782301 | 10978301 |
| 248 | NA07048 | [2515685 chr7 | 7 | 115531433 | 115535130 | 3698  | 2  | -0.870922 | 0.114458 | 115523520 | 115533784 | 115534405 | 11553585 |
| 249 | NA07048 | [2515685 chr7 | 7 | 125639507 | 125644775 | 5269  | 6  | -0.744    | 0.073332 | 125639054 | 125639961 | 125644046 | 12564550 |
| 250 | NA07048 | [2515685 chr7 | 7 | 133243381 | 133245202 | 1822  | 2  | 0.525073  | 0.103303 | 133243008 | 133243755 | 133244207 | 13324619 |
| 251 | NA07048 | [2515685 chr7 | 7 | 133245202 | 133257360 | 12159 | 13 | 2.114581  | 0.069843 | 133244207 | 133246197 | 133255009 | 13326093 |
| 252 | NA07048 | [2515685 chr7 | 7 | 141496492 | 141505136 | 8645  | 11 | -0.447849 | 0.042237 | 141495918 | 141497066 | 141504428 | 14150584 |
| 253 | NA07048 | [2515685 chr7 | 7 | 141505136 | 141521152 | 16017 | 19 | -1.688363 | 0.050387 | 141504428 | 141505844 | 141520892 | 14152141 |
| 254 | NA07048 | [2515685 chr7 | 7 | 141521152 | 141526577 | 5426  | 9  | -0.45127  | 0.045476 | 141520892 | 141521412 | 141526109 | 14152704 |
| 255 | NA07048 | [2515685 chr7 | 7 | 142001201 | 142011262 | 10062 | 12 | -0.836162 | 0.045561 | 142000868 | 142001534 | 142010276 | 14201224 |
| 256 | NA07048 | [2515685 chr7 | 7 | 149285428 | 149287696 | 2269  | 3  | 0.534429  | 0.081499 | 149285181 | 149285676 | 149286346 | 14928904 |
| 257 | NA07048 | [2515685 chr7 | 7 | 152948945 | 152951306 | 2362  | 3  | 0.439238  | 0.07992  | 152947501 | 152950389 | 152951051 | 15295156 |
| 258 | NA07048 | [2515685 chr7 | 7 | 154133469 | 154135452 | 1984  | 3  | -0.394831 | 0.078082 | 154133205 | 154133733 | 154135122 | 15413578 |
| 259 | NA07048 | [2515685 chr7 | 7 | 154313918 | 154317132 | 3215  | 2  | -0.565116 | 0.111603 | 154313297 | 154314539 | 154316505 | 15431776 |
| 260 | NA07048 | [2515685 chr7 | 7 | 156939035 | 156942423 | 3389  | 5  | 0.316348  | 0.055169 | 156938932 | 156939138 | 156941474 | 15694337 |
| 261 | NA07048 | [2515685 chr7 | 7 | 156976112 | 156978464 | 2353  | 2  | 0.99356   | 0.108982 | 156975812 | 156976413 | 156978796 | 15697903 |
| 262 | NA07048 | [2515685 chr7 | 7 | 158617060 | 158624379 | 7320  | 6  | 0.866813  | 0.066048 | 158616763 | 158617357 | 158622028 | 15862673 |
| 263 | NA07048 | [2515685 chr8 | 8 | 345497    | 346408    | 912   | 2  | 0.997346  | 0.116362 | 345046    | 345949    | 346376    | 34644    |
| 264 | NA07048 | [2515685 chr8 | 8 | 1326445   | 1343509   | 17065 | 47 | -0.273698 | 0.019202 | 1325775   | 1327116   | 1342795   | 134422   |
| 265 | NA07048 | [2515685 chr8 | 8 | 2238733   | 2253794   | 15062 | 10 | 0.796384  | 0.050961 | 2233839   | 2241488   | 2251039   | 225752   |
| 266 | NA07048 | [2515685 chr8 | 8 | 4124123   | 4125947   | 1825  | 2  | -0.586587 | 0.116726 | 4123842   | 4124405   | 4125402   | 412649   |
| 267 | NA07048 | [2515685 chr8 | 8 | 5582875   | 5594011   | 11137 | 9  | 0.769744  | 0.047603 | 5582615   | 5583135   | 5592820   | 559520   |
| 268 | NA07048 | [2515685 chr8 | 8 | 5817892   | 5820042   | 2151  | 2  | -0.759475 | 0.128315 | 5817072   | 5818713   | 5819661   | 582042   |
| 269 | NA07048 | [2515685 chr8 | 8 | 6817073   | 6866734   | 49662 | 88 | -0.38359  | 0.013604 | 6816809   | 6817338   | 6866719   | 686675   |
| 270 | NA07048 | [2515685 chr8 | 8 | 7176337   | 7187896   | 11560 | 32 | 0.728198  | 0.027431 | 7176045   | 7176630   | 7187590   | 718820   |
| 271 | NA07048 | [2515685 chr8 | 8 | 7206074   | 7207633   | 1560  | 4  | 0.393431  | 0.0723   | 7205579   | 7206570   | 7207477   | 720778   |
| 272 | NA07048 | [2515685 chr8 | 8 | 7274835   | 7276544   | 1710  | 4  | -0.409122 | 0.066738 | 7274374   | 7275297   | 7276202   | 727688   |
| 273 | NA07048 | [2515685 chr8 | 8 | 7774981   | 7776578   | 1598  | 4  | -0.409121 | 0.066738 | 7774750   | 7775212   | 7776117   | 777704   |
| 274 | NA07048 | [2515685 chr8 | 8 | 7862335   | 7873897   | 11563 | 33 | 0.752206  | 0.026151 | 7862030   | 7862641   | 7873605   | 787419   |
| 275 | NA07048 | [2515685 chr8 | 8 | 12023188  | 12035286  | 12099 | 32 | 0.731719  | 0.027652 | 12022997  | 12023380  | 12034973  | 1203559  |
| 276 | NA07048 | [2515685 chr8 | 8 | 12276602  | 12284041  | 7440  | 14 | 0.615669  | 0.038172 | 12276206  | 12276998  | 12283622  | 1228446  |
| 277 | NA07048 | [2515685 chr8 | 8 | 12284606  | 12289383  | 4778  | 4  | -0.387811 | 0.071642 | 12284461  | 12284752  | 12289185  | 1228958  |
| 278 | NA07048 | [2515685 chr8 | 8 | 20022286  | 20024771  | 2486  | 2  | -1.079396 | 0.127922 | 20021082  | 20023491  | 20024338  | 2002520  |
| 279 | NA07048 | [2515685 chr8 | 8 | 25028407  | 25046917  | 18511 | 15 | -0.937884 | 0.038907 | 25027885  | 25028930  | 25046777  | 2504705  |
| 280 | NA07048 | [2515685 chr8 | 8 | 49081430  | 49084499  | 3070  | 2  | 1.10582   | 0.121611 | 49079497  | 49083364  | 49084089  | 4908491  |
| 281 | NA07048 | [2515685 chr8 | 8 | 51193670  | 51201152  | 7483  | 11 | -0.833849 | 0.049042 | 51193335  | 51194005  | 51200867  | 5120143  |
| 282 | NA07048 | [2515685 chr8 | 8 | 54001807  | 54002677  | 871   | 2  | -0.682756 | 0.112297 | 54001673  | 54001942  | 54002470  | 5400288  |
| 283 | NA07048 | [2515685 chr8 | 8 | 58278355  | 58287850  | 9496  | 8  | 0.580501  | 0.046375 | 58277116  | 58279595  | 58287616  | 5828808  |

|     |         |                |    |           |           |         |      |           |          |           |           |           |          |
|-----|---------|----------------|----|-----------|-----------|---------|------|-----------|----------|-----------|-----------|-----------|----------|
| 284 | NAO7048 | [2515685 chr8  | 8  | 58342071  | 58350616  | 8546    | 5    | 0.37411   | 0.060883 | 58341760  | 58342382  | 58350364  | 58350861 |
| 285 | NAO7048 | [2515685 chr8  | 8  | 58358152  | 58359483  | 1332    | 2    | 0.451409  | 0.090254 | 58357917  | 58358387  | 58359260  | 58359701 |
| 286 | NAO7048 | [2515685 chr8  | 8  | 85423649  | 85431920  | 8272    | 7    | 0.949587  | 0.058377 | 85423043  | 85424256  | 85431347  | 85432491 |
| 287 | NAO7048 | [2515685 chr8  | 8  | 86742169  | 86910255  | 168087  | 105  | 0.352352  | 0.012234 | 86741757  | 86742581  | 86910002  | 86910501 |
| 288 | NAO7048 | [2515685 chr8  | 8  | 115132573 | 115134747 | 2175    | 2    | 0.516633  | 0.098892 | 115132392 | 115132754 | 115133315 | 11513618 |
| 289 | NAO7048 | [2515685 chr8  | 8  | 115148105 | 115149916 | 1812    | 2    | -0.88305  | 0.124557 | 115147694 | 115148517 | 115149348 | 11515048 |
| 290 | NAO7048 | [2515685 chr8  | 8  | 115703942 | 115715318 | 11377   | 11   | -0.853493 | 0.047582 | 115703065 | 115704820 | 115712563 | 11571874 |
| 291 | NAO7048 | [2515685 chr8  | 8  | 120222659 | 120229952 | 7294    | 6    | 0.884835  | 0.060812 | 120218251 | 120225414 | 120229434 | 12023047 |
| 292 | NAO7048 | [2515685 chr8  | 8  | 144782809 | 144785960 | 3152    | 2    | 0.53426   | 0.10476  | 144771440 | 144785564 | 144785821 | 14478609 |
| 293 | NAO7048 | [2515685 chr9  | 9  | 19116775  | 19118304  | 1530    | 2    | 0.751555  | 0.125446 | 19116471  | 19117079  | 19117918  | 19118691 |
| 294 | NAO7048 | [2515685 chr9  | 9  | 28836246  | 28838385  | 2140    | 2    | -0.908173 | 0.099527 | 28835879  | 28836613  | 28837661  | 28839111 |
| 295 | NAO7048 | [2515685 chr9  | 9  | 29913654  | 29988618  | 74965   | 67   | -0.849818 | 0.018827 | 29912912  | 29914396  | 29986257  | 29993421 |
| 296 | NAO7048 | [2515685 chr9  | 9  | 33374200  | 33394472  | 20273   | 9    | -0.27609  | 0.04451  | 33354854  | 33376561  | 33392111  | 33412601 |
| 297 | NAO7048 | [2515685 chr9  | 9  | 38899810  | 38900502  | 693     | 2    | 0.544484  | 0.094908 | 38899653  | 38899968  | 38899981  | 38901021 |
| 298 | NAO7048 | [2515685 chr9  | 9  | 39025016  | 39027704  | 2689    | 2    | 0.573123  | 0.095136 | 39023735  | 39026298  | 39027196  | 39028211 |
| 299 | NAO7048 | [2515685 chr9  | 9  | 39053058  | 39407524  | 354467  | 586  | -0.326367 | 0.001603 | 39052333  | 39053784  | 39407326  | 39407721 |
| 300 | NAO7048 | [2515685 chr9  | 9  | 39438037  | 39718803  | 280767  | 410  | -0.326367 | 0.001603 | 39435676  | 39486172  | 39478605  | 39719001 |
| 301 | NAO7048 | [2515685 chr9  | 9  | 39748721  | 39898076  | 149356  | 223  | -0.326367 | 0.001603 | 39746360  | 39797038  | 39897666  | 39898481 |
| 302 | NAO7048 | [2515685 chr9  | 9  | 40089867  | 40491521  | 401655  | 619  | -0.326367 | 0.001603 | 40089166  | 40090569  | 40491324  | 40491711 |
| 303 | NAO7048 | [2515685 chr9  | 9  | 40561572  | 41234952  | 673381  | 852  | -0.326367 | 0.001603 | 40561162  | 40561983  | 41234900  | 41235001 |
| 304 | NAO7048 | [2515685 chr9  | 9  | 41243366  | 41479585  | 236220  | 324  | -0.326367 | 0.001603 | 41241005  | 41249466  | 41479387  | 41479781 |
| 305 | NAO7048 | [2515685 chr9  | 9  | 41566824  | 42154882  | 588059  | 873  | -0.326367 | 0.001603 | 41566414  | 41567235  | 42154472  | 42155291 |
| 306 | NAO7048 | [2515685 chr9  | 9  | 42221854  | 43808781  | 1586928 | 2234 | -0.326367 | 0.001603 | 42219819  | 42223890  | 43808388  | 43809171 |
| 307 | NAO7048 | [2515685 chr9  | 9  | 44106290  | 44129713  | 23424   | 47   | -0.266302 | 0.019425 | 44105816  | 44106765  | 44128831  | 44130591 |
| 308 | NAO7048 | [2515685 chr9  | 9  | 44153357  | 44153558  | 202     | 2    | -0.619919 | 0.104835 | 44153348  | 44153366  | 44153395  | 44153721 |
| 309 | NAO7048 | [2515685 chr9  | 9  | 44616654  | 44617411  | 758     | 3    | -0.523321 | 0.089591 | 44616475  | 44616834  | 44617353  | 44617461 |
| 310 | NAO7048 | [2515685 chr9  | 9  | 45715901  | 45719342  | 3442    | 2    | -0.602747 | 0.090148 | 45711249  | 45718262  | 45718877  | 45719801 |
| 311 | NAO7048 | [2515685 chr9  | 9  | 64287329  | 64291716  | 4388    | 10   | -0.479546 | 0.043655 | 64286990  | 64287668  | 64291523  | 64291911 |
| 312 | NAO7048 | [2515685 chr9  | 9  | 65007765  | 65285906  | 278142  | 150  | -0.324844 | 0.011044 | 65007266  | 65008264  | 65285026  | 65286781 |
| 313 | NAO7048 | [2515685 chr9  | 9  | 65309543  | 65309744  | 202     | 2    | -0.619919 | 0.104835 | 65309534  | 65309552  | 65309581  | 65309901 |
| 314 | NAO7048 | [2515685 chr9  | 9  | 65409889  | 65410660  | 772     | 3    | -0.52332  | 0.089591 | 65409831  | 65409947  | 65410460  | 65410861 |
| 315 | NAO7048 | [2515685 chr9  | 9  | 65587525  | 65832213  | 244689  | 173  | -0.263764 | 0.010853 | 65587244  | 65587807  | 65831939  | 65832481 |
| 316 | NAO7048 | [2515685 chr9  | 9  | 66011368  | 66012061  | 694     | 2    | 0.544484  | 0.094908 | 66010847  | 66011890  | 66011904  | 66012211 |
| 317 | NAO7048 | [2515685 chr9  | 9  | 66230851  | 66231052  | 202     | 2    | -0.619918 | 0.104835 | 66230842  | 66230860  | 66230889  | 66231211 |
| 318 | NAO7048 | [2515685 chr9  | 9  | 66332894  | 66333675  | 782     | 3    | -0.52332  | 0.089591 | 66332836  | 66332952  | 66333475  | 66333871 |
| 319 | NAO7048 | [2515685 chr9  | 9  | 67477554  | 67479578  | 2025    | 4    | -0.530659 | 0.066425 | 67477167  | 67477941  | 67479289  | 67479861 |
| 320 | NAO7048 | [2515685 chr9  | 9  | 76777070  | 76779384  | 2315    | 2    | 0.929668  | 0.128039 | 76776756  | 76777385  | 76779820  | 76779841 |
| 321 | NAO7048 | [2515685 chr9  | 9  | 101794472 | 101804576 | 10105   | 8    | -0.80101  | 0.061978 | 101793428 | 101795517 | 101803113 | 10180603 |
| 322 | NAO7048 | [2515685 chr9  | 9  | 112902065 | 112932269 | 30205   | 42   | 0.707317  | 0.019061 | 112901557 | 112902574 | 112931621 | 11293291 |
| 323 | NAO7048 | [2515685 chr9  | 9  | 135438420 | 135444067 | 5648    | 2    | 3.228738  | 0.157014 | 135383632 | 135440781 | 135443016 | 13544511 |
| 324 | NAO7048 | [2515685 chr9  | 9  | 138188003 | 138189923 | 1921    | 45   | 0.97871   | 0.022656 | 138187808 | 138188198 | 138189840 | 13819000 |
| 325 | NAO7048 | [2515685 chr10 | 10 | 170571    | 172369    | 1799    | 2    | 0.91263   | 0.094563 | 170341    | 170801    | 171237    | 173501   |
| 326 | NAO7048 | [2515685 chr10 | 10 | 3099589   | 3101985   | 2397    | 2    | 0.599322  | 0.112389 | 3098962   | 3100217   | 3101441   | 3102521  |
| 327 | NAO7048 | [2515685 chr10 | 10 | 6693908   | 6703893   | 9986    | 8    | 0.838129  | 0.056053 | 6692231   | 6695585   | 6703779   | 6704001  |
| 328 | NAO7048 | [2515685 chr10 | 10 | 20036833  | 20038315  | 1483    | 2    | -0.852374 | 0.112911 | 20036464  | 20037202  | 20038007  | 20038621 |
| 329 | NAO7048 | [2515685 chr10 | 10 | 37486514  | 37527174  | 40661   | 62   | -0.37817  | 0.01584  | 37486043  | 37486985  | 37526783  | 37527561 |
| 330 | NAO7048 | [2515685 chr10 | 10 | 39019439  | 39028446  | 9008    | 14   | 0.262104  | 0.037193 | 39019324  | 39019555  | 39028219  | 39028671 |
| 331 | NAO7048 | [2515685 chr10 | 10 | 39064447  | 39068040  | 3594    | 6    | 0.403831  | 0.050969 | 39064217  | 39064677  | 39066686  | 39069391 |
| 332 | NAO7048 | [2515685 chr10 | 10 | 46222149  | 46228317  | 6169    | 2    | 0.492178  | 0.08129  | 46222132  | 46222166  | 46228145  | 46228491 |
| 333 | NAO7048 | [2515685 chr10 | 10 | 46261765  | 46262229  | 465     | 3    | 0.359528  | 0.071356 | 46261621  | 46261910  | 46262089  | 46262361 |
| 334 | NAO7048 | [2515685 chr10 | 10 | 56117212  | 56139275  | 22064   | 20   | -0.971428 | 0.034657 | 56115764  | 56118661  | 56138931  | 56139611 |
| 335 | NAO7048 | [2515685 chr10 | 10 | 59489512  | 59492379  | 2868    | 3    | 0.401235  | 0.079892 | 59489461  | 59489564  | 59490590  | 59494161 |
| 336 | NAO7048 | [2515685 chr10 | 10 | 81130008  | 81131239  | 1232    | 4    | 0.547591  | 0.062568 | 81129619  | 81130398  | 81131087  | 81131391 |
| 337 | NAO7048 | [2515685 chr10 | 10 | 81450207  | 81451438  | 1232    | 4    | 0.54758   | 0.062568 | 81449818  | 81450597  | 81451286  | 81451591 |
| 338 | NAO7048 | [2515685 chr10 | 10 | 81587909  | 81589341  | 1433    | 3    | 0.536784  | 0.072403 | 81587312  | 81588507  | 81589190  | 81589491 |

|     |         |                |    |           |           |         |      |           |          |           |           |           |          |
|-----|---------|----------------|----|-----------|-----------|---------|------|-----------|----------|-----------|-----------|-----------|----------|
| 339 | NA07048 | [2515685 chr10 | 10 | 81770852  | 81783506  | 12655   | 15   | -0.280509 | 0.03824  | 81770662  | 81771043  | 81782964  | 81784041 |
| 340 | NA07048 | [2515685 chr10 | 10 | 88972215  | 88973430  | 1216    | 4    | 0.55127   | 0.062628 | 88971824  | 88972607  | 88973280  | 8897358  |
| 341 | NA07048 | [2515685 chr10 | 10 | 89104175  | 89105652  | 1478    | 3    | 0.526924  | 0.072369 | 89103532  | 89104819  | 89105500  | 89105804 |
| 342 | NA07048 | [2515685 chr10 | 10 | 90930310  | 90936395  | 6086    | 8    | -0.834825 | 0.058292 | 90929856  | 90930765  | 90936050  | 90936744 |
| 343 | NA07048 | [2515685 chr10 | 10 | 124336365 | 124341749 | 5385    | 6    | 0.563766  | 0.066508 | 124335581 | 124337149 | 124341238 | 12434226 |
| 344 | NA07048 | [2515685 chr10 | 10 | 134813662 | 134816190 | 2529    | 3    | -0.652664 | 0.080148 | 134813181 | 134814143 | 134815683 | 13481669 |
| 345 | NA07048 | [2515685 chr10 | 10 | 135179346 | 135183528 | 4183    | 23   | -0.554852 | 0.023968 | 135178919 | 135179774 | 135183320 | 13518373 |
| 346 | NA07048 | [2515685 chr10 | 10 | 135365507 | 135367159 | 1653    | 2    | 1.088168  | 0.131407 | 135364999 | 135366016 | 135366656 | 13536766 |
| 347 | NA07048 | [2515685 chr11 | 11 | 969654    | 971069    | 1416    | 2    | 0.927402  | 0.110482 | 969333    | 969976    | 970737    | 971401   |
| 348 | NA07048 | [2515685 chr11 | 11 | 2840307   | 2842410   | 2104    | 3    | 1.417627  | 0.10113  | 2839959   | 2840656   | 2841856   | 2842961  |
| 349 | NA07048 | [2515685 chr11 | 11 | 2999682   | 3137579   | 137898  | 2    | -0.969603 | 0.092773 | 2949255   | 3002762   | 3134499   | 3173264  |
| 350 | NA07048 | [2515685 chr11 | 11 | 4267332   | 4270903   | 3572    | 6    | 0.351984  | 0.056698 | 4267310   | 4267355   | 4270699   | 4271107  |
| 351 | NA07048 | [2515685 chr11 | 11 | 4318494   | 4322001   | 3508    | 7    | 0.322676  | 0.052223 | 4318472   | 4318517   | 4321857   | 4322144  |
| 352 | NA07048 | [2515685 chr11 | 11 | 5717038   | 5722025   | 4988    | 3    | 2.614088  | 0.144455 | 5716660   | 5717416   | 5718945   | 5725487  |
| 353 | NA07048 | [2515685 chr11 | 11 | 5741269   | 5765993   | 24725   | 33   | 2.395418  | 0.042087 | 5741059   | 5741480   | 5765632   | 5766354  |
| 354 | NA07048 | [2515685 chr11 | 11 | 10224780  | 10229788  | 5009    | 5    | 0.633363  | 0.073448 | 10219961  | 10227860  | 10227972  | 10231601 |
| 355 | NA07048 | [2515685 chr11 | 11 | 11831868  | 11833089  | 1222    | 2    | 1.003739  | 0.118476 | 11831412  | 11832324  | 11832853  | 11833321 |
| 356 | NA07048 | [2515685 chr11 | 11 | 18906905  | 18928671  | 21767   | 30   | 0.441085  | 0.026811 | 18906533  | 18907278  | 18928457  | 18928881 |
| 357 | NA07048 | [2515685 chr11 | 11 | 49665830  | 49715828  | 49999   | 36   | 0.497433  | 0.024853 | 49665251  | 49666410  | 49712748  | 49721987 |
| 358 | NA07048 | [2515685 chr11 | 11 | 55124643  | 55212648  | 88006   | 98   | -0.808942 | 0.015991 | 55124460  | 55124827  | 55209568  | 55215751 |
| 359 | NA07048 | [2515685 chr11 | 11 | 73812690  | 73818580  | 5891    | 4    | -0.441534 | 0.077631 | 73812400  | 73812981  | 73818213  | 73818947 |
| 360 | NA07048 | [2515685 chr11 | 11 | 81149111  | 81151129  | 2019    | 2    | 0.609883  | 0.112268 | 81148927  | 81149295  | 81150916  | 81151347 |
| 361 | NA07048 | [2515685 chr11 | 11 | 88266938  | 88303948  | 37011   | 40   | 0.279662  | 0.023604 | 88266424  | 88267453  | 88303762  | 88304131 |
| 362 | NA07048 | [2515685 chr11 | 11 | 89185847  | 89188706  | 2860    | 3    | 0.534991  | 0.088365 | 89185554  | 89186141  | 89188235  | 89189177 |
| 363 | NA07048 | [2515685 chr11 | 11 | 89260757  | 89266247  | 5491    | 9    | -0.284858 | 0.0489   | 89260437  | 89261077  | 89265993  | 89266507 |
| 364 | NA07048 | [2515685 chr11 | 11 | 89323920  | 89330042  | 6123    | 12   | -0.297684 | 0.041781 | 89323666  | 89324175  | 89329729  | 89330351 |
| 365 | NA07048 | [2515685 chr11 | 11 | 106744846 | 106751051 | 6206    | 9    | -0.643028 | 0.054153 | 106744561 | 106745131 | 106747971 | 10675483 |
| 366 | NA07048 | [2515685 chr11 | 11 | 134107699 | 134112290 | 4592    | 5    | 0.670469  | 0.068017 | 134106591 | 134108808 | 134111845 | 13411273 |
| 367 | NA07048 | [2515685 chr12 | 12 | 736840    | 744802    | 7963    | 9    | 0.952982  | 0.050344 | 736616    | 737064    | 744211    | 745394   |
| 368 | NA07048 | [2515685 chr12 | 12 | 2112534   | 2127044   | 14511   | 15   | 0.677434  | 0.038325 | 2109107   | 2115961   | 2126809   | 2127271  |
| 369 | NA07048 | [2515685 chr12 | 12 | 6113530   | 6117052   | 3523    | 3    | 0.632003  | 0.097086 | 6111640   | 6115421   | 6116289   | 6117814  |
| 370 | NA07048 | [2515685 chr12 | 12 | 11417520  | 11436142  | 18623   | 11   | -0.498179 | 0.043988 | 11415824  | 11419217  | 11435669  | 11436611 |
| 371 | NA07048 | [2515685 chr12 | 12 | 12605956  | 12607299  | 1344    | 2    | 0.786643  | 0.133115 | 12605559  | 12606353  | 12606864  | 12607737 |
| 372 | NA07048 | [2515685 chr12 | 12 | 36251517  | 36268932  | 17416   | 34   | -0.255824 | 0.024504 | 36250456  | 36252579  | 36267984  | 36269887 |
| 373 | NA07048 | [2515685 chr12 | 12 | 46994634  | 46997204  | 2571    | 4    | -0.569754 | 0.07892  | 46994358  | 46994911  | 46996797  | 46997617 |
| 374 | NA07048 | [2515685 chr12 | 12 | 57004588  | 57020201  | 15614   | 8    | 0.306631  | 0.052095 | 57004218  | 57004958  | 57019624  | 57020771 |
| 375 | NA07048 | [2515685 chr12 | 12 | 69156919  | 69167889  | 10971   | 11   | 0.801322  | 0.047065 | 69138649  | 69160412  | 69164396  | 69215017 |
| 376 | NA07048 | [2515685 chr12 | 12 | 70475445  | 70476812  | 1368    | 2    | -0.682125 | 0.111845 | 70475180  | 70475711  | 70476524  | 70477107 |
| 377 | NA07048 | [2515685 chr12 | 12 | 131046250 | 131046750 | 501     | 2    | 1.170071  | 0.126087 | 131046129 | 131046371 | 131046551 | 13104694 |
| 378 | NA07048 | [2515685 chr13 | 13 | 20791907  | 20798885  | 6979    | 8    | -0.265824 | 0.052704 | 20791561  | 20792253  | 20798220  | 20799551 |
| 379 | NA07048 | [2515685 chr13 | 13 | 25947233  | 25950398  | 3166    | 3    | 3.623845  | 0.169724 | 25946194  | 25948272  | 25949415  | 25951387 |
| 380 | NA07048 | [2515685 chr13 | 13 | 33029573  | 33043421  | 13849   | 9    | 0.82898   | 0.055084 | 33000262  | 33034253  | 33042925  | 33043911 |
| 381 | NA07048 | [2515685 chr13 | 13 | 36971484  | 36983475  | 11992   | 10   | -0.829335 | 0.051635 | 36969416  | 36973552  | 36982905  | 36984041 |
| 382 | NA07048 | [2515685 chr13 | 13 | 69633905  | 69673289  | 39385   | 42   | 0.871152  | 0.024295 | 69633412  | 69634399  | 69672985  | 69673597 |
| 383 | NA07048 | [2515685 chr13 | 13 | 109215660 | 109217089 | 1430    | 5    | -0.549594 | 0.061857 | 109215230 | 109216090 | 109216885 | 10921729 |
| 384 | NA07048 | [2515685 chr13 | 13 | 112716382 | 112720600 | 4219    | 5    | -0.473576 | 0.06799  | 112715846 | 112716919 | 112720250 | 11272095 |
| 385 | NA07048 | [2515685 chr13 | 13 | 113079647 | 113086818 | 7172    | 3    | 0.669573  | 0.085695 | 113078890 | 113080404 | 113082138 | 11309434 |
| 386 | NA07048 | [2515685 chr13 | 13 | 113098417 | 113102480 | 4064    | 4    | -0.930854 | 0.078107 | 113097958 | 113098876 | 113102128 | 11310283 |
| 387 | NA07048 | [2515685 chr14 | 14 | 18429036  | 19494842  | 1065807 | 1607 | -0.250754 | 0.003457 | 18427834  | 18430239  | 19494444  | 19495247 |
| 388 | NA07048 | [2515685 chr14 | 14 | 19619355  | 19625484  | 6130    | 3    | 3.846297  | 0.200652 | 19612261  | 19624114  | 19625018  | 19625951 |
| 389 | NA07048 | [2515685 chr14 | 14 | 32022775  | 32026140  | 3366    | 2    | -0.980586 | 0.124503 | 32022274  | 32023276  | 32023749  | 32028537 |
| 390 | NA07048 | [2515685 chr14 | 14 | 40679041  | 40739449  | 60409   | 57   | -0.813405 | 0.021156 | 40678078  | 40680005  | 40739212  | 40739687 |
| 391 | NA07048 | [2515685 chr14 | 14 | 41982987  | 41984637  | 1651    | 2    | -0.529859 | 0.101549 | 41982609  | 41983366  | 41984273  | 41985007 |
| 392 | NA07048 | [2515685 chr14 | 14 | 42059344  | 42062997  | 3654    | 2    | 0.755174  | 0.116108 | 42056485  | 42062203  | 42062601  | 42063397 |
| 393 | NA07048 | [2515685 chr14 | 14 | 53780053  | 53783579  | 3527    | 6    | -0.836763 | 0.069179 | 53779833  | 53780274  | 53783238  | 53783927 |

|     |         |                |    |           |           |        |     |           |          |           |           |           |           |
|-----|---------|----------------|----|-----------|-----------|--------|-----|-----------|----------|-----------|-----------|-----------|-----------|
| 394 | NA07048 | [2515685 chr14 | 14 | 73052083  | 73053781  | 1699   | 2   | 0.456826  | 0.083364 | 73051714  | 73052452  | 73052927  | 73054631  |
| 395 | NA07048 | [2515685 chr14 | 14 | 73063171  | 73119729  | 56559  | 51  | 0.692518  | 0.021177 | 73061866  | 73064476  | 73118276  | 7312118:  |
| 396 | NA07048 | [2515685 chr14 | 14 | 78091954  | 78093387  | 1434   | 2   | 0.552683  | 0.101757 | 78091569  | 78092339  | 78092873  | 7809390   |
| 397 | NA07048 | [2515685 chr14 | 14 | 103250708 | 103252299 | 1592   | 2   | 0.769995  | 0.098451 | 103250307 | 103251109 | 103251638 | 10325296  |
| 398 | NA07048 | [2515685 chr14 | 14 | 104766812 | 104778505 | 11694  | 145 | -0.372429 | 0.011003 | 104766457 | 104767167 | 104778286 | 10477872  |
| 399 | NA07048 | [2515685 chr15 | 15 | 18824476  | 18836662  | 12187  | 13  | 0.390948  | 0.041736 | 18824302  | 18824650  | 18836367  | 1883695:  |
| 400 | NA07048 | [2515685 chr15 | 15 | 18849369  | 18888948  | 39580  | 39  | 0.36603   | 0.023757 | 18848726  | 18850013  | 18886645  | 1889275:  |
| 401 | NA07048 | [2515685 chr15 | 15 | 19092673  | 19293921  | 201249 | 258 | 0.261057  | 0.004386 | 19092490  | 19092856  | 19293604  | 1929423:  |
| 402 | NA07048 | [2515685 chr15 | 15 | 19300508  | 20094951  | 794444 | 763 | 0.261057  | 0.004386 | 19298205  | 19305017  | 20092648  | 2019778:  |
| 403 | NA07048 | [2515685 chr15 | 15 | 20940676  | 20940987  | 312    | 2   | -0.517065 | 0.082012 | 20940578  | 20940774  | 20940968  | 2094100:  |
| 404 | NA07048 | [2515685 chr15 | 15 | 21051502  | 21068072  | 16571  | 13  | 0.289944  | 0.03649  | 21051321  | 21051684  | 21065769  | 2111638   |
| 405 | NA07048 | [2515685 chr15 | 15 | 21228375  | 21228686  | 312    | 2   | -0.517065 | 0.082012 | 21228277  | 21228473  | 21228667  | 2122870:  |
| 406 | NA07048 | [2515685 chr15 | 15 | 21606753  | 21614601  | 7849   | 7   | 0.865009  | 0.064492 | 21606459  | 21607047  | 21612298  | 2163669:  |
| 407 | NA07048 | [2515685 chr15 | 15 | 24986053  | 24992250  | 6198   | 7   | 0.803294  | 0.060181 | 24985426  | 24986680  | 24991680  | 2499282:  |
| 408 | NA07048 | [2515685 chr15 | 15 | 26251915  | 26252414  | 500    | 2   | -0.517065 | 0.082012 | 26251815  | 26252015  | 26252209  | 2625262:  |
| 409 | NA07048 | [2515685 chr15 | 15 | 26622234  | 26622638  | 405    | 2   | -0.517065 | 0.082012 | 26622123  | 26622345  | 26622539  | 2662273:  |
| 410 | NA07048 | [2515685 chr15 | 15 | 26875842  | 26877026  | 1185   | 2   | 1.249424  | 0.125203 | 26875299  | 26876385  | 26876824  | 2687722:  |
| 411 | NA07048 | [2515685 chr15 | 15 | 41924444  | 41928405  | 3962   | 3   | 0.620025  | 0.091077 | 41923444  | 41925445  | 41927893  | 4192891:  |
| 412 | NA07048 | [2515685 chr15 | 15 | 54577186  | 54582092  | 4907   | 8   | -0.919629 | 0.056254 | 54577013  | 54577360  | 54579789  | 5461884:  |
| 413 | NA07048 | [2515685 chr15 | 15 | 75117585  | 75119946  | 2362   | 4   | -2.131182 | 0.109312 | 75117343  | 75117827  | 75119741  | 7512015:  |
| 414 | NA07048 | [2515685 chr15 | 15 | 80437061  | 80441377  | 4317   | 8   | 0.261854  | 0.046773 | 80436487  | 80437636  | 80440972  | 8044178:  |
| 415 | NA07048 | [2515685 chr15 | 15 | 80823554  | 80824667  | 1114   | 4   | 0.363502  | 0.067744 | 80822980  | 80824129  | 80824640  | 8082469:  |
| 416 | NA07048 | [2515685 chr15 | 15 | 82333041  | 82335194  | 2154   | 2   | -0.820008 | 0.108267 | 82332284  | 82333799  | 82334729  | 8233566:  |
| 417 | NA07048 | [2515685 chr15 | 15 | 100109640 | 100122682 | 13043  | 98  | -0.40749  | 0.011827 | 100108905 | 100110376 | 100122315 | 10012305: |
| 418 | NA07048 | [2515685 chr16 | 16 | 669910    | 671309    | 1400   | 2   | 0.72779   | 0.120514 | 669664    | 670156    | 670956    | 671665:   |
| 419 | NA07048 | [2515685 chr16 | 16 | 2570795   | 2573727   | 2933   | 8   | -0.647431 | 0.055832 | 2570428   | 2571162   | 2573487   | 257396:   |
| 420 | NA07048 | [2515685 chr16 | 16 | 2599511   | 2609392   | 9882   | 18  | -0.637465 | 0.035173 | 2598958   | 2600064   | 2609025   | 260975:   |
| 421 | NA07048 | [2515685 chr16 | 16 | 2638196   | 2640225   | 2030   | 3   | -3.043609 | 0.165966 | 2637783   | 2638609   | 2639826   | 264062:   |
| 422 | NA07048 | [2515685 chr16 | 16 | 2683701   | 2687414   | 3714   | 5   | -0.492496 | 0.054739 | 2683435   | 2683967   | 2686938   | 268789:   |
| 423 | NA07048 | [2515685 chr16 | 16 | 5287117   | 5290632   | 3516   | 2   | 1.521231  | 0.133338 | 5286149   | 5288085   | 5288751   | 529327:   |
| 424 | NA07048 | [2515685 chr16 | 16 | 10167686  | 10169246  | 1561   | 2   | 0.630915  | 0.113655 | 10167420  | 10167953  | 10168871  | 1016962:  |
| 425 | NA07048 | [2515685 chr16 | 16 | 16633469  | 16639120  | 5652   | 4   | 0.991992  | 0.077164 | 16632502  | 16634437  | 16638386  | 1663985:  |
| 426 | NA07048 | [2515685 chr16 | 16 | 16703782  | 16704883  | 1102   | 2   | -0.681258 | 0.089961 | 16702971  | 16704593  | 16704736  | 1670503:  |
| 427 | NA07048 | [2515685 chr16 | 16 | 17562576  | 17563883  | 1308   | 2   | -0.800226 | 0.117188 | 17562115  | 17563038  | 17563474  | 1756429:  |
| 428 | NA07048 | [2515685 chr16 | 16 | 18574518  | 18575622  | 1105   | 2   | -0.681266 | 0.089961 | 18574371  | 18574665  | 18574808  | 1857643:  |
| 429 | NA07048 | [2515685 chr16 | 16 | 21475665  | 21502620  | 26956  | 19  | 0.381156  | 0.033251 | 21475438  | 21475893  | 21501101  | 2150414:  |
| 430 | NA07048 | [2515685 chr16 | 16 | 22521651  | 22618743  | 97093  | 84  | 0.367339  | 0.015859 | 22521425  | 22521878  | 22617181  | 2262030:  |
| 431 | NA07048 | [2515685 chr16 | 16 | 28286969  | 28367545  | 80577  | 120 | -0.287029 | 0.012976 | 28286781  | 28287157  | 28366478  | 2836861:  |
| 432 | NA07048 | [2515685 chr16 | 16 | 28522768  | 28525408  | 2641   | 3   | -0.568134 | 0.079394 | 28522366  | 28523170  | 28525115  | 2852570:  |
| 433 | NA07048 | [2515685 chr16 | 16 | 28606021  | 28665963  | 59943  | 98  | -0.300025 | 0.014512 | 28604445  | 28607597  | 28665777  | 2866615:  |
| 434 | NA07048 | [2515685 chr16 | 16 | 30101364  | 30102578  | 1215   | 2   | 0.824602  | 0.11571  | 30101045  | 30101684  | 30102223  | 3010293:  |
| 435 | NA07048 | [2515685 chr16 | 16 | 31900721  | 31901605  | 885    | 2   | 1.027654  | 0.11773  | 31900500  | 31900942  | 31901267  | 3190194:  |
| 436 | NA07048 | [2515685 chr16 | 16 | 32106365  | 32106660  | 296    | 2   | 1.368819  | 0.12063  | 32106136  | 32106595  | 32106634  | 3210668:  |
| 437 | NA07048 | [2515685 chr16 | 16 | 32159898  | 32160377  | 480    | 2   | -1.877139 | 0.099526 | 32159453  | 32160343  | 32160346  | 3216040:  |
| 438 | NA07048 | [2515685 chr16 | 16 | 32580873  | 32616183  | 35311  | 107 | -0.256996 | 0.012668 | 32580695  | 32581051  | 32615350  | 3261701:  |
| 439 | NA07048 | [2515685 chr16 | 16 | 32660409  | 32660703  | 295    | 2   | 1.368837  | 0.120631 | 32660384  | 32660435  | 32660474  | 3266093:  |
| 440 | NA07048 | [2515685 chr16 | 16 | 33047346  | 33047640  | 295    | 2   | 1.368819  | 0.12063  | 33047117  | 33047575  | 33047614  | 3304766:  |
| 441 | NA07048 | [2515685 chr16 | 16 | 33100875  | 33101346  | 472    | 2   | -1.877139 | 0.099526 | 33100438  | 33101312  | 33101315  | 3310137:  |
| 442 | NA07048 | [2515685 chr16 | 16 | 33157406  | 33157879  | 474    | 2   | -1.877143 | 0.099527 | 33156967  | 33157845  | 33157848  | 3315791:  |
| 443 | NA07048 | [2515685 chr16 | 16 | 33207215  | 33217055  | 9841   | 18  | 0.33377   | 0.029472 | 33206951  | 33207485  | 33216946  | 3321716:  |
| 444 | NA07048 | [2515685 chr16 | 16 | 33259841  | 33296771  | 36931  | 50  | 0.282304  | 0.020192 | 33254522  | 33261722  | 33296573  | 3329697:  |
| 445 | NA07048 | [2515685 chr16 | 16 | 33392689  | 33397333  | 4645   | 9   | 0.333472  | 0.046021 | 33392062  | 33393316  | 33397172  | 3339749:  |
| 446 | NA07048 | [2515685 chr16 | 16 | 33439046  | 33447535  | 8490   | 17  | 0.349673  | 0.03417  | 33438887  | 33439205  | 33447235  | 3344783:  |
| 447 | NA07048 | [2515685 chr16 | 16 | 33515534  | 33534345  | 18812  | 20  | 0.322274  | 0.032635 | 33515385  | 33515683  | 33533464  | 3353522:  |
| 448 | NA07048 | [2515685 chr16 | 16 | 34321825  | 34609074  | 287250 | 323 | -0.516006 | 0.008272 | 34317185  | 34323706  | 34607193  | 3461732:  |

|     |         |                |    |          |          |         |     |           |          |          |          |          |          |
|-----|---------|----------------|----|----------|----------|---------|-----|-----------|----------|----------|----------|----------|----------|
| 449 | NAO7048 | [2515685 chr16 | 16 | 54356424 | 54380125 | 23702   | 24  | -0.550814 | 0.030093 | 54356120 | 54356729 | 54379862 | 54380381 |
| 450 | NAO7048 | [2515685 chr16 | 16 | 54401577 | 54403491 | 1915    | 2   | 0.681267  | 0.110725 | 54401078 | 54402076 | 54402534 | 54404441 |
| 451 | NAO7048 | [2515685 chr16 | 16 | 57204541 | 57207585 | 3045    | 3   | 4.769539  | 0.19653  | 57204170 | 57204913 | 57206938 | 57208231 |
| 452 | NAO7048 | [2515685 chr16 | 16 | 68682276 | 68685390 | 3115    | 2   | -0.572712 | 0.110341 | 68681902 | 68682651 | 68685071 | 68685711 |
| 453 | NAO7048 | [2515685 chr16 | 16 | 83995435 | 84004171 | 8737    | 78  | 0.286832  | 0.014696 | 83995404 | 83995467 | 84003767 | 84004571 |
| 454 | NAO7048 | [2515685 chr16 | 16 | 84562720 | 84565235 | 2516    | 11  | 0.868348  | 0.049532 | 84561685 | 84563756 | 84565142 | 84565321 |
| 455 | NAO7048 | [2515685 chr16 | 16 | 85087756 | 85089036 | 1281    | 2   | 0.917703  | 0.115052 | 85087427 | 85088085 | 85088690 | 85089381 |
| 456 | NAO7048 | [2515685 chr16 | 16 | 85520140 | 85522780 | 2641    | 3   | -0.539733 | 0.094471 | 85519638 | 85520643 | 85522363 | 85523191 |
| 457 | NAO7048 | [2515685 chr16 | 16 | 88181036 | 88182713 | 1678    | 2   | 0.66303   | 0.107131 | 88180612 | 88181461 | 88182173 | 88183251 |
| 458 | NAO7048 | [2515685 chr16 | 16 | 88495127 | 88496495 | 1369    | 2   | -0.488439 | 0.08129  | 88494483 | 88495771 | 88496243 | 88496741 |
| 459 | NAO7048 | [2515685 chr17 | 17 | 911980   | 915554   | 3575    | 4   | 0.66659   | 0.075786 | 911452   | 912508   | 915413   | 915691   |
| 460 | NAO7048 | [2515685 chr17 | 17 | 966845   | 969578   | 2734    | 21  | 0.365326  | 0.033621 | 966537   | 967154   | 969378   | 969775   |
| 461 | NAO7048 | [2515685 chr17 | 17 | 16657271 | 16665630 | 8360    | 13  | -0.338245 | 0.042219 | 16657056 | 16657486 | 16665353 | 16665901 |
| 462 | NAO7048 | [2515685 chr17 | 17 | 18299050 | 18307779 | 8730    | 15  | 0.427554  | 0.037545 | 18298294 | 18299807 | 18307759 | 18307801 |
| 463 | NAO7048 | [2515685 chr17 | 17 | 18331739 | 18332345 | 607     | 2   | -1.126384 | 0.107727 | 18331509 | 18331970 | 18331978 | 18332711 |
| 464 | NAO7048 | [2515685 chr17 | 17 | 20299935 | 20300531 | 597     | 2   | -1.126385 | 0.107727 | 20299568 | 20300303 | 20300311 | 20300751 |
| 465 | NAO7048 | [2515685 chr17 | 17 | 20324749 | 20328814 | 4066    | 9   | 0.429225  | 0.046666 | 20324531 | 20324968 | 20328574 | 20329051 |
| 466 | NAO7048 | [2515685 chr17 | 17 | 21945626 | 21954469 | 8844    | 14  | -0.406231 | 0.038153 | 21945338 | 21945915 | 21954310 | 21954621 |
| 467 | NAO7048 | [2515685 chr17 | 17 | 31532462 | 31576621 | 44160   | 64  | -0.36019  | 0.015838 | 31532146 | 31532779 | 31574748 | 31578491 |
| 468 | NAO7048 | [2515685 chr17 | 17 | 31620520 | 31678186 | 57667   | 76  | -0.350661 | 0.014312 | 31620204 | 31620837 | 31676315 | 31680051 |
| 469 | NAO7048 | [2515685 chr17 | 17 | 32829500 | 32833231 | 3732    | 5   | -2.619352 | 0.119543 | 32828825 | 32830175 | 32832670 | 32833791 |
| 470 | NAO7048 | [2515685 chr17 | 17 | 36675530 | 36685343 | 9814    | 10  | -2.690823 | 0.079268 | 36675011 | 36676049 | 36684647 | 36686041 |
| 471 | NAO7048 | [2515685 chr17 | 17 | 41035524 | 41036525 | 1002    | 2   | 1.184716  | 0.108587 | 41035120 | 41035928 | 41035967 | 41037081 |
| 472 | NAO7048 | [2515685 chr17 | 17 | 41521287 | 41676708 | 155422  | 155 | 0.33807   | 0.00505  | 41521002 | 41521572 | 41676309 | 41677101 |
| 473 | NAO7048 | [2515685 chr17 | 17 | 41694440 | 41987438 | 292999  | 371 | 0.33807   | 0.00505  | 41693144 | 41695737 | 41987182 | 41987691 |
| 474 | NAO7048 | [2515685 chr17 | 17 | 41992958 | 42134816 | 141859  | 133 | 0.33807   | 0.00505  | 41992694 | 41993223 | 42134422 | 42135211 |
| 475 | NAO7048 | [2515685 chr17 | 17 | 75224568 | 75225559 | 992     | 3   | -0.422507 | 0.066373 | 75224293 | 75224843 | 75225308 | 75225811 |
| 476 | NAO7048 | [2515685 chr18 | 18 | 6902997  | 6904611  | 1615    | 2   | -0.654773 | 0.116078 | 6902443  | 6903552  | 6904056  | 6905161  |
| 477 | NAO7048 | [2515685 chr18 | 18 | 14702025 | 14703577 | 1553    | 2   | -0.746323 | 0.118961 | 14701431 | 14702619 | 14703103 | 14704051 |
| 478 | NAO7048 | [2515685 chr18 | 18 | 28142218 | 28143399 | 1182    | 2   | 0.949445  | 0.124481 | 28141854 | 28142583 | 28143055 | 28143741 |
| 479 | NAO7048 | [2515685 chr18 | 18 | 74297715 | 74299391 | 1677    | 5   | 0.588335  | 0.065756 | 74297243 | 74298187 | 74299167 | 74299611 |
| 480 | NAO7048 | [2515685 chr18 | 18 | 74373005 | 74376367 | 3363    | 7   | 0.704154  | 0.044971 | 74372064 | 74373947 | 74375833 | 74376901 |
| 481 | NAO7048 | [2515685 chr18 | 18 | 74392800 | 74398225 | 5426    | 4   | 0.64033   | 0.077407 | 74390826 | 74394774 | 74397790 | 74398661 |
| 482 | NAO7048 | [2515685 chr19 | 19 | 58103    | 61808    | 3706    | 3   | 0.95562   | 0.085873 | 57927    | 58280    | 61022    | 62595    |
| 483 | NAO7048 | [2515685 chr19 | 19 | 310414   | 312953   | 2540    | 14  | -0.347959 | 0.038445 | 309687   | 311142   | 312913   | 312994   |
| 484 | NAO7048 | [2515685 chr19 | 19 | 331568   | 333129   | 1562    | 2   | 0.87433   | 0.103186 | 331314   | 331822   | 332310   | 333941   |
| 485 | NAO7048 | [2515685 chr19 | 19 | 8708780  | 8763535  | 54756   | 94  | 0.77575   | 0.012605 | 8708296  | 8709264  | 8763160  | 8763911  |
| 486 | NAO7048 | [2515685 chr19 | 19 | 23007903 | 23013841 | 5939    | 6   | 0.824258  | 0.066686 | 22990964 | 23010431 | 23013525 | 23014151 |
| 487 | NAO7048 | [2515685 chr19 | 19 | 23108259 | 23109446 | 1188    | 2   | 1.41762   | 0.126763 | 23107903 | 23108615 | 23108879 | 23110011 |
| 488 | NAO7048 | [2515685 chr19 | 19 | 23257205 | 23258538 | 1334    | 2   | -0.905088 | 0.118132 | 23256882 | 23257529 | 23258213 | 23258861 |
| 489 | NAO7048 | [2515685 chr19 | 19 | 23602482 | 23604607 | 2126    | 5   | 0.405191  | 0.07448  | 23602241 | 23602723 | 23604368 | 23604841 |
| 490 | NAO7048 | [2515685 chr19 | 19 | 39419837 | 39421349 | 1513    | 3   | 0.632401  | 0.092923 | 39419616 | 39420059 | 39421018 | 39421168 |
| 491 | NAO7048 | [2515685 chr19 | 19 | 40540866 | 40556003 | 15138   | 18  | -0.421193 | 0.031701 | 40540646 | 40541086 | 40555760 | 40556241 |
| 492 | NAO7048 | [2515685 chr19 | 19 | 41450186 | 41493613 | 43428   | 28  | -0.578559 | 0.025785 | 41421528 | 41452714 | 41491085 | 41497851 |
| 493 | NAO7048 | [2515685 chr19 | 19 | 42450472 | 42487512 | 37041   | 33  | -0.595193 | 0.022794 | 42413600 | 42453000 | 42486487 | 42488531 |
| 494 | NAO7048 | [2515685 chr19 | 19 | 43974792 | 43977294 | 2503    | 2   | -0.64733  | 0.10015  | 43974369 | 43975216 | 43975620 | 43978961 |
| 495 | NAO7048 | [2515685 chr19 | 19 | 44914561 | 44919210 | 4650    | 6   | -0.308161 | 0.060221 | 44913308 | 44915815 | 44918867 | 44919551 |
| 496 | NAO7048 | [2515685 chr19 | 19 | 45412775 | 45413556 | 782     | 2   | -0.542985 | 0.098172 | 45412566 | 45412985 | 45413285 | 45413821 |
| 497 | NAO7048 | [2515685 chr19 | 19 | 53098479 | 53336157 | 2237679 | 516 | -0.27361  | 0.005844 | 53098017 | 53098941 | 53335244 | 53337071 |
| 498 | NAO7048 | [2515685 chr19 | 19 | 58209430 | 58245460 | 36031   | 28  | -0.75829  | 0.028241 | 58208997 | 58209863 | 58245024 | 58245891 |
| 499 | NAO7048 | [2515685 chr19 | 19 | 59247755 | 59252061 | 4307    | 5   | 0.8721    | 0.071346 | 59246427 | 59249084 | 59251854 | 59252261 |
| 500 | NAO7048 | [2515685 chr19 | 19 | 59420142 | 59435274 | 15133   | 18  | 0.372529  | 0.033864 | 59419795 | 59420489 | 59435027 | 59435521 |
| 501 | NAO7048 | [2515685 chr19 | 19 | 59492384 | 59493822 | 1439    | 2   | 0.612342  | 0.106328 | 59491977 | 59492791 | 59493600 | 59494041 |
| 502 | NAO7048 | [2515685 chr19 | 19 | 60958920 | 60978404 | 19485   | 16  | -0.428491 | 0.036835 | 60957933 | 60959907 | 60976310 | 60980491 |
| 503 | NAO7048 | [2515685 chr20 | 20 | 1494617  | 1511097  | 16481   | 18  | -0.261153 | 0.030941 | 1494422  | 1494812  | 1510534  | 1511661  |

|     |         |                |    |           |           |        |     |           |          |           |           |           |           |
|-----|---------|----------------|----|-----------|-----------|--------|-----|-----------|----------|-----------|-----------|-----------|-----------|
| 504 | NA07048 | [2515685 chr20 | 20 | 1511097   | 1532477   | 21381  | 26  | -2.111486 | 0.046166 | 1510534   | 1511660   | 1532182   | 1532773   |
| 505 | NA07048 | [2515685 chr20 | 20 | 1533575   | 1544060   | 10486  | 15  | -0.394778 | 0.033695 | 1533384   | 1533766   | 1543588   | 1544533   |
| 506 | NA07048 | [2515685 chr20 | 20 | 25714111  | 25774048  | 59938  | 111 | -0.314417 | 0.013586 | 25713986  | 25714237  | 25773787  | 25774310  |
| 507 | NA07048 | [2515685 chr20 | 20 | 25938648  | 25999063  | 60416  | 111 | -0.308592 | 0.013561 | 25938371  | 25938926  | 25998938  | 25999181  |
| 508 | NA07048 | [2515685 chr20 | 20 | 26136817  | 26139530  | 2714   | 5   | 0.457866  | 0.071953 | 26136626  | 26137008  | 26139184  | 26139871  |
| 509 | NA07048 | [2515685 chr20 | 20 | 59951513  | 59957050  | 5538   | 18  | 0.806097  | 0.034205 | 59950681  | 59952345  | 59956538  | 59957561  |
| 510 | NA07048 | [2515685 chr20 | 20 | 62066380  | 62068214  | 1835   | 8   | 1.656505  | 0.061707 | 62066146  | 62066615  | 62067671  | 62068751  |
| 511 | NA07048 | [2515685 chr20 | 20 | 62275204  | 62278261  | 3058   | 35  | 0.281913  | 0.026687 | 62274903  | 62275506  | 62278223  | 62278291  |
| 512 | NA07048 | [2515685 chr21 | 21 | 10042797  | 10076005  | 33209  | 41  | 0.25829   | 0.022447 | 10042583  | 10043012  | 10075742  | 10076261  |
| 513 | NA07048 | [2515685 chr21 | 21 | 10118506  | 10141050  | 22545  | 17  | -0.276658 | 0.036362 | 10117933  | 10119080  | 10140582  | 10141511  |
| 514 | NA07048 | [2515685 chr21 | 21 | 13738548  | 13739792  | 1245   | 2   | -0.977111 | 0.119271 | 13738070  | 13739027  | 13739487  | 13740091  |
| 515 | NA07048 | [2515685 chr22 | 22 | 14475216  | 14565499  | 90284  | 167 | -0.330042 | 0.010723 | 14474991  | 14475442  | 14565253  | 14565741  |
| 516 | NA07048 | [2515685 chr22 | 22 | 15376688  | 15381912  | 5225   | 8   | 0.401678  | 0.045329 | 15376184  | 15377193  | 15379231  | 15386131  |
| 517 | NA07048 | [2515685 chr22 | 22 | 17158715  | 17208002  | 49288  | 80  | 0.402347  | 0.015544 | 17158684  | 17158747  | 17207501  | 17208501  |
| 518 | NA07048 | [2515685 chr22 | 22 | 17221797  | 17224330  | 2534   | 5   | 0.525106  | 0.062897 | 17221464  | 17222130  | 17224241  | 17224421  |
| 519 | NA07048 | [2515685 chr22 | 22 | 17385504  | 17394963  | 9460   | 17  | -0.435294 | 0.035444 | 17385031  | 17385977  | 17394595  | 17395331  |
| 520 | NA07048 | [2515685 chr22 | 22 | 18744519  | 18863336  | 118818 | 145 | -0.529623 | 0.012081 | 18742262  | 18746777  | 18863099  | 18863571  |
| 521 | NA07048 | [2515685 chr22 | 22 | 18963287  | 18966292  | 3006   | 7   | 0.441873  | 0.054297 | 18963082  | 18963492  | 18965854  | 18966731  |
| 522 | NA07048 | [2515685 chr22 | 22 | 19380073  | 19419487  | 39415  | 12  | -0.570337 | 0.043472 | 19377752  | 19382395  | 19416806  | 19449921  |
| 523 | NA07048 | [2515685 chr22 | 22 | 19789638  | 19793944  | 4307   | 9   | 0.252292  | 0.007272 | 19788642  | 19790634  | 19793875  | 19794011  |
| 524 | NA07048 | [2515685 chr22 | 22 | 19798382  | 19873608  | 75227  | 130 | 0.252292  | 0.007272 | 19798358  | 19798406  | 19873545  | 19873671  |
| 525 | NA07048 | [2515685 chr22 | 22 | 19893306  | 20003066  | 109761 | 177 | 0.252292  | 0.007272 | 19893021  | 19893591  | 20002927  | 20003201  |
| 526 | NA07048 | [2515685 chr22 | 22 | 20035209  | 20121795  | 86587  | 138 | -0.474632 | 0.008368 | 20034972  | 20035446  | 20121548  | 20122041  |
| 527 | NA07048 | [2515685 chr22 | 22 | 20137248  | 20243642  | 106395 | 148 | -0.474632 | 0.008368 | 20136561  | 20137935  | 20240961  | 20302281  |
| 528 | NA07048 | [2515685 chr22 | 22 | 22611178  | 22617550  | 6373   | 8   | -0.440524 | 0.015663 | 22609725  | 22612631  | 22617295  | 22617801  |
| 529 | NA07048 | [2515685 chr22 | 22 | 22622691  | 22663644  | 40954  | 78  | -0.440524 | 0.015663 | 22621975  | 22623407  | 22662190  | 22665091  |
| 530 | NA07048 | [2515685 chr22 | 22 | 22672624  | 22691501  | 18878  | 17  | 0.933584  | 0.02563  | 22672391  | 22672858  | 22691088  | 22691911  |
| 531 | NA07048 | [2515685 chr22 | 22 | 22695407  | 22720154  | 24748  | 27  | 0.933584  | 0.02563  | 22695112  | 22695703  | 22719882  | 22720421  |
| 532 | NA07048 | [2515685 chr22 | 22 | 22985370  | 22986040  | 671    | 3   | 0.518589  | 0.085346 | 22985041  | 22985699  | 22985733  | 22986341  |
| 533 | NA07048 | [2515685 chr22 | 22 | 22994483  | 22998522  | 4040   | 10  | 0.384305  | 0.048819 | 22994040  | 22994927  | 22997635  | 22999401  |
| 534 | NA07048 | [2515685 chr22 | 22 | 33619409  | 33622591  | 3183   | 4   | 0.935307  | 0.073475 | 33618939  | 33619879  | 33622541  | 33622641  |
| 535 | NA07048 | [2515685 chrX  | 23 | 38340304  | 38343955  | 3652   | 2   | -3.579089 | 0.173259 | 38339963  | 38340645  | 38341288  | 38346621  |
| 536 | NA07048 | [2515685 chrX  | 23 | 56677475  | 56690665  | 13191  | 31  | 0.439033  | 0.021101 | 56677130  | 56677820  | 56690311  | 56691011  |
| 537 | NA07048 | [2515685 chrX  | 23 | 56701963  | 56703209  | 1247   | 2   | 0.674718  | 0.122785 | 56701752  | 56702175  | 56702945  | 56703471  |
| 538 | NA07048 | [2515685 chrX  | 23 | 70741274  | 70745998  | 4725   | 38  | 0.755295  | 0.02648  | 70739871  | 70742677  | 70744597  | 70747401  |
| 539 | NA07048 | [2515685 chrX  | 23 | 89978016  | 89982541  | 4526   | 2   | -0.652685 | 0.126669 | 89977589  | 89978444  | 89979662  | 89985421  |
| 540 | NA07048 | [2515685 chrX  | 23 | 105355082 | 105360133 | 5052   | 17  | 0.534298  | 0.05597  | 105352123 | 105358042 | 105359168 | 105361091 |
| 541 | NA07048 | [2515685 chrX  | 23 | 114782515 | 114796920 | 14406  | 36  | -1.12072  | 0.015341 | 114781834 | 114783196 | 114796162 | 114797671 |
| 542 | NA07048 | [2515685 chrX  | 23 | 114804126 | 114821026 | 16901  | 36  | -1.12072  | 0.015341 | 114803617 | 114804636 | 114817056 | 114836071 |
| 543 | NA07048 | [2515685 chrX  | 23 | 115720486 | 115831210 | 110725 | 133 | 0.828389  | 0.013802 | 115711706 | 115724456 | 115829969 | 115832451 |
| 544 | NA07048 | [2515685 chrX  | 23 | 134291129 | 134297901 | 6773   | 8   | -0.255785 | 0.048596 | 134290012 | 134292246 | 134297409 | 134298391 |
| 545 | NA07048 | [2515685 chrX  | 23 | 139816039 | 139816664 | 626    | 2   | 0.407022  | 0.081129 | 139815865 | 139816213 | 139816214 | 139817111 |
| 546 | NA07048 | [2515685 chrX  | 23 | 139828044 | 139828669 | 626    | 2   | 0.407021  | 0.081129 | 139827870 | 139828218 | 139828219 | 139829111 |
| 547 | NA07048 | [2515685 chrX  | 23 | 140055856 | 140056467 | 612    | 3   | 0.409902  | 0.072283 | 140055415 | 140056297 | 140056303 | 140056663 |
| 548 | NA07048 | [2515685 chrX  | 23 | 140392152 | 140392674 | 523    | 2   | 0.407019  | 0.081129 | 140391805 | 140392499 | 140392500 | 140392841 |
| 549 | NA07048 | [2515685 chrX  | 23 | 140409056 | 140409683 | 628    | 2   | 0.407022  | 0.081129 | 140408882 | 140409230 | 140409231 | 140410131 |
| 550 | NA07048 | [2515685 chrX  | 23 | 140505823 | 140506483 | 661    | 2   | 0.407022  | 0.081129 | 140505364 | 140506283 | 140506284 | 140506681 |
| 551 | NA07048 | [2515685 chrY  | 24 | 3637846   | 3767169   | 129324 | 2   | 0.789027  | 0.130307 | 3540580   | 3640785   | 3764230   | 4157721   |
| 552 | NA07048 | [2515685 chrY  | 24 | 6154733   | 6180572   | 25840  | 93  | -0.303312 | 0.012866 | 6154416   | 6155050   | 6180387   | 6180751   |
| 553 | NA07048 | [2515685 chrY  | 24 | 9191918   | 9206566   | 14649  | 51  | 0.334228  | 0.020114 | 9191837   | 9191999   | 9206485   | 9206648   |
| 554 | NA07048 | [2515685 chrY  | 24 | 9213374   | 9972007   | 758634 | 715 | -0.309219 | 0.004431 | 9212424   | 9214325   | 9971739   | 9972271   |
| 555 | NA07048 | [2515685 chrY  | 24 | 9974573   | 9983978   | 9406   | 41  | -0.309219 | 0.004431 | 9974206   | 9974941   | 9983856   | 9984101   |
| 556 | NA07048 | [2515685 chrY  | 24 | 21993689  | 22051534  | 57846  | 191 | 0.357676  | 0.008657 | 21993662  | 21993716  | 22050614  | 22052451  |
| 557 | NA07048 | [2515685 chrY  | 24 | 22362148  | 22400461  | 38314  | 127 | 0.37464   | 0.010489 | 22361228  | 22363068  | 22400431  | 22400491  |
| 558 | NA07048 | [2515685 chrY  | 24 | 22423925  | 22424722  | 798    | 2   | -0.442642 | 0.085579 | 22423779  | 22424072  | 22424451  | 22424991  |

|     |         |               |    |           |           |        |     |           |          |           |           |           |           |
|-----|---------|---------------|----|-----------|-----------|--------|-----|-----------|----------|-----------|-----------|-----------|-----------|
| 559 | NA07048 | [2515685 chrY | 24 | 22650628  | 22665789  | 15162  | 53  | 0.408064  | 0.01668  | 22649721  | 22651535  | 22665407  | 2266617;  |
| 560 | NA07048 | [2515685 chrY | 24 | 22797835  | 22798350  | 516    | 2   | 0.462203  | 0.08129  | 22797713  | 22797957  | 22797960  | 2279874   |
| 561 | NA07048 | [2515685 chrY | 24 | 22889169  | 22904311  | 15143  | 52  | 0.412392  | 0.016885 | 22888787  | 22889551  | 22903429  | 2290519-  |
| 562 | NA07048 | [2515685 chrY | 24 | 23130214  | 23131011  | 798    | 2   | -0.442643 | 0.085579 | 23129943  | 23130486  | 23130865  | 2313115;  |
| 563 | NA07048 | [2515685 chrY | 24 | 24033717  | 24034514  | 798    | 2   | -0.442649 | 0.08558  | 24033571  | 24033864  | 24034243  | 2403478;  |
| 564 | NA07048 | [2515685 chrY | 24 | 26604644  | 26605440  | 797    | 2   | -0.44265  | 0.08558  | 26604373  | 26604915  | 26605294  | 2660558   |
| 1   | NA10863 | [2515685 chr1 | 1  | 29401     | 71292     | 41892  | 51  | 0.581544  | 0.020496 | 27752     | 31050     | 70533     | 72052     |
| 2   | NA10863 | [2515685 chr1 | 1  | 446129    | 500887    | 54759  | 53  | -0.269794 | 0.013421 | 446116    | 446143    | 500092    | 50168;    |
| 3   | NA10863 | [2515685 chr1 | 1  | 562325    | 591070    | 28746  | 49  | -0.269794 | 0.013421 | 561529    | 563121    | 587801    | 60431;    |
| 4   | NA10863 | [2515685 chr1 | 1  | 601046    | 612159    | 11114  | 8   | -1.209103 | 0.055913 | 587801    | 604315    | 610122    | 61419;    |
| 5   | NA10863 | [2515685 chr1 | 1  | 1653053   | 1657077   | 4025   | 5   | -0.36111  | 0.060723 | 1652846   | 1653260   | 1656899   | 165725;   |
| 6   | NA10863 | [2515685 chr1 | 1  | 1706311   | 1712489   | 6179   | 10  | -0.28579  | 0.043931 | 1706096   | 1706527   | 1712202   | 171277;   |
| 7   | NA10863 | [2515685 chr1 | 1  | 1853012   | 1854645   | 1634   | 2   | 1.195557  | 0.099957 | 1852616   | 1853409   | 1853816   | 185547;   |
| 8   | NA10863 | [2515685 chr1 | 1  | 12828197  | 12855470  | 27274  | 46  | 0.274094  | 0.02106  | 12827875  | 12828520  | 12855210  | 1285573;  |
| 9   | NA10863 | [2515685 chr1 | 1  | 12883296  | 12886858  | 3563   | 6   | 0.430029  | 0.052136 | 12883255  | 12883337  | 12886536  | 1288718;  |
| 10  | NA10863 | [2515685 chr1 | 1  | 13124784  | 13125221  | 438    | 2   | 0.531576  | 0.092318 | 13124609  | 13124960  | 13124977  | 1312546;  |
| 11  | NA10863 | [2515685 chr1 | 1  | 13159940  | 13162706  | 2767   | 4   | 0.527234  | 0.05912  | 13159618  | 13160263  | 13162366  | 1316304;  |
| 12  | NA10863 | [2515685 chr1 | 1  | 13164423  | 13165991  | 1569   | 4   | 0.374828  | 0.060378 | 13164167  | 13164679  | 13165683  | 1316630;  |
| 13  | NA10863 | [2515685 chr1 | 1  | 13380737  | 13386788  | 6052   | 12  | 0.348794  | 0.035009 | 13380415  | 13381060  | 13386480  | 1338709;  |
| 14  | NA10863 | [2515685 chr1 | 1  | 25352992  | 25409301  | 56310  | 58  | 0.307039  | 0.019298 | 25352754  | 25353230  | 25408840  | 2540976;  |
| 15  | NA10863 | [2515685 chr1 | 1  | 25434181  | 25439981  | 5801   | 14  | 0.281302  | 0.039069 | 25433990  | 25434373  | 25438920  | 2544104;  |
| 16  | NA10863 | [2515685 chr1 | 1  | 30407974  | 30409303  | 1330   | 2   | -0.502753 | 0.098335 | 30407563  | 30408386  | 30409034  | 3040957;  |
| 17  | NA10863 | [2515685 chr1 | 1  | 34770326  | 34780982  | 10657  | 14  | -2.124406 | 0.061644 | 34766123  | 34773595  | 34780581  | 3478138;  |
| 18  | NA10863 | [2515685 chr1 | 1  | 72478372  | 72524180  | 45809  | 36  | -2.354952 | 0.041294 | 72478140  | 72478604  | 72523661  | 7252470;  |
| 19  | NA10863 | [2515685 chr1 | 1  | 89188689  | 89190762  | 2074   | 4   | 2.015687  | 0.118325 | 89188470  | 89188908  | 89190458  | 8919106;  |
| 20  | NA10863 | [2515685 chr1 | 1  | 103827497 | 104013080 | 185584 | 293 | 0.280245  | 0.00782  | 103827175 | 103827820 | 104013004 | 10401315  |
| 21  | NA10863 | [2515685 chr1 | 1  | 105728161 | 105735462 | 7302   | 8   | -0.855244 | 0.058744 | 105727820 | 105728503 | 105734532 | 10573639  |
| 22  | NA10863 | [2515685 chr1 | 1  | 108514938 | 108565175 | 50238  | 59  | 0.327922  | 0.019605 | 108514864 | 108515012 | 108565023 | 10856532  |
| 23  | NA10863 | [2515685 chr1 | 1  | 108638096 | 108688767 | 50672  | 60  | 0.327587  | 0.019282 | 108637939 | 108638254 | 108688693 | 10868884  |
| 24  | NA10863 | [2515685 chr1 | 1  | 111089464 | 111100714 | 11251  | 11  | -0.840435 | 0.049716 | 111088288 | 111090640 | 111100119 | 11110131; |
| 25  | NA10863 | [2515685 chr1 | 1  | 112405902 | 112416691 | 10790  | 10  | 0.594373  | 0.050324 | 112405415 | 112406389 | 112416423 | 11241696  |
| 26  | NA10863 | [2515685 chr1 | 1  | 116874175 | 116915240 | 41066  | 51  | 0.327402  | 0.020349 | 116873908 | 116874442 | 116914887 | 11691559  |
| 27  | NA10863 | [2515685 chr1 | 1  | 141971552 | 141976719 | 5168   | 17  | 0.25903   | 0.031075 | 141971472 | 141971633 | 141976542 | 14197689  |
| 28  | NA10863 | [2515685 chr1 | 1  | 142666974 | 142667766 | 793    | 2   | 0.676225  | 0.113992 | 142666850 | 142667099 | 142667509 | 14266802  |
| 29  | NA10863 | [2515685 chr1 | 1  | 144893673 | 144894799 | 1127   | 2   | 0.539522  | 0.106346 | 144893507 | 144893840 | 144894501 | 14489509  |
| 30  | NA10863 | [2515685 chr1 | 1  | 145100273 | 145105440 | 5168   | 16  | 0.281202  | 0.03308  | 145100193 | 145100354 | 145105263 | 14510561  |
| 31  | NA10863 | [2515685 chr1 | 1  | 145819541 | 145823469 | 3929   | 6   | 0.53191   | 0.063477 | 145819262 | 145819821 | 145823354 | 14582358  |
| 32  | NA10863 | [2515685 chr1 | 1  | 145829707 | 145839481 | 9775   | 5   | 0.448814  | 0.064339 | 145829172 | 145830242 | 145839093 | 14583986  |
| 33  | NA10863 | [2515685 chr1 | 1  | 145896002 | 145900354 | 4353   | 4   | 0.450854  | 0.071154 | 145894632 | 145897372 | 145899914 | 14590079  |
| 34  | NA10863 | [2515685 chr1 | 1  | 145930102 | 145951531 | 21430  | 25  | 0.405921  | 0.029623 | 145929732 | 145930472 | 145951467 | 14595159  |
| 35  | NA10863 | [2515685 chr1 | 1  | 146462712 | 146475780 | 13060  | 7   | 0.306287  | 0.050193 | 146462499 | 146462943 | 146473762 | 14647779  |
| 36  | NA10863 | [2515685 chr1 | 1  | 148998878 | 149005918 | 7041   | 13  | 0.355646  | 0.036107 | 148998401 | 148999355 | 149004680 | 14900715  |
| 37  | NA10863 | [2515685 chr1 | 1  | 149573821 | 149583431 | 9611   | 5   | 0.948138  | 0.077232 | 149573460 | 149574182 | 149582912 | 14958395  |
| 38  | NA10863 | [2515685 chr1 | 1  | 193443495 | 193552515 | 109021 | 93  | 0.52208   | 0.015628 | 193443280 | 193443710 | 193551981 | 19355305  |
| 39  | NA10863 | [2515685 chr1 | 1  | 193615671 | 193650443 | 34773  | 30  | 0.252346  | 0.026396 | 193615441 | 193615901 | 193650245 | 19365064  |
| 40  | NA10863 | [2515685 chr1 | 1  | 203245415 | 203247868 | 2454   | 2   | 0.708251  | 0.1184   | 203245018 | 203245812 | 203245758 | 20324815  |
| 41  | NA10863 | [2515685 chr1 | 1  | 209390853 | 209402508 | 11656  | 9   | -0.767458 | 0.054628 | 209390492 | 209391215 | 209401777 | 20940323  |
| 42  | NA10863 | [2515685 chr1 | 1  | 220570241 | 220571400 | 1160   | 2   | 0.790012  | 0.098292 | 220569940 | 220570543 | 220571101 | 22057170  |
| 43  | NA10863 | [2515685 chr1 | 1  | 233202665 | 233204956 | 2292   | 42  | -0.826525 | 0.021028 | 233202312 | 233203018 | 233204364 | 23320554  |
| 44  | NA10863 | [2515685 chr1 | 1  | 239368545 | 239498531 | 129987 | 15  | -0.431816 | 0.039102 | 239368239 | 239368851 | 239496181 | 23950088  |
| 45  | NA10863 | [2515685 chr1 | 1  | 243009520 | 243011368 | 1849   | 3   | -0.755181 | 0.083607 | 243008430 | 243010610 | 243011204 | 24301153  |
| 46  | NA10863 | [2515685 chr1 | 1  | 244872415 | 244874098 | 1684   | 5   | 0.462956  | 0.071012 | 244872245 | 244872585 | 244873799 | 24487439  |
| 47  | NA10863 | [2515685 chr1 | 1  | 245053742 | 245055036 | 1295   | 2   | -1.022645 | 0.152924 | 245053467 | 245054017 | 245054669 | 24505540  |
| 48  | NA10863 | [2515685 chr1 | 1  | 245068899 | 245121920 | 53022  | 51  | -0.728479 | 0.021254 | 245066998 | 245070801 | 245121605 | 24512223  |
| 49  | NA10863 | [2515685 chr2 | 2  | 296456    | 298925    | 2470   | 8   | -0.414608 | 0.05354  | 296213    | 296699    | 298661    | 29918;    |

|             |               |   |           |           |        |     |           |          |           |           |           |          |
|-------------|---------------|---|-----------|-----------|--------|-----|-----------|----------|-----------|-----------|-----------|----------|
| 50 NA10863  | [2515685 chr2 | 2 | 6280657   | 6286347   | 5691   | 2   | 0.62136   | 0.107079 | 6279100   | 6282214   | 6284835   | 6287859  |
| 51 NA10863  | [2515685 chr2 | 2 | 13507585  | 13514973  | 7389   | 9   | -0.282443 | 0.050526 | 13507388  | 13507783  | 13512022  | 13519011 |
| 52 NA10863  | [2515685 chr2 | 2 | 24512004  | 24523319  | 11316  | 10  | -0.851256 | 0.04365  | 24510528  | 24513481  | 24521259  | 24525371 |
| 53 NA10863  | [2515685 chr2 | 2 | 35896479  | 35905930  | 9452   | 3   | -0.798851 | 0.084902 | 35879425  | 35899430  | 35902979  | 35909827 |
| 54 NA10863  | [2515685 chr2 | 2 | 37868822  | 37911473  | 42652  | 44  | 0.314331  | 0.021514 | 37868568  | 37869077  | 37911214  | 37911731 |
| 55 NA10863  | [2515685 chr2 | 2 | 41150168  | 41161411  | 11244  | 13  | -0.802297 | 0.039864 | 41149866  | 41150471  | 41160114  | 41162701 |
| 56 NA10863  | [2515685 chr2 | 2 | 51838599  | 51839736  | 1138   | 2   | -1.001458 | 0.126729 | 51838229  | 51838969  | 51839379  | 51840091 |
| 57 NA10863  | [2515685 chr2 | 2 | 56563626  | 56567381  | 3756   | 2   | 3.427718  | 0.22248  | 56556559  | 56566577  | 56567035  | 56567721 |
| 58 NA10863  | [2515685 chr2 | 2 | 61675589  | 61676777  | 1189   | 2   | 1.794803  | 0.147167 | 61675200  | 61675979  | 61676468  | 61677708 |
| 59 NA10863  | [2515685 chr2 | 2 | 75296507  | 75298934  | 2428   | 2   | 0.574448  | 0.10207  | 75296056  | 75296959  | 75298532  | 75299331 |
| 60 NA10863  | [2515685 chr2 | 2 | 87473293  | 87478765  | 5473   | 9   | 0.448813  | 0.047007 | 87472060  | 87474526  | 87478435  | 87479091 |
| 61 NA10863  | [2515685 chr2 | 2 | 87981685  | 88098957  | 117273 | 10  | 0.273193  | 0.047167 | 87965922  | 87984636  | 88097049  | 88100861 |
| 62 NA10863  | [2515685 chr2 | 2 | 91337090  | 91344510  | 7421   | 9   | 0.298639  | 0.048692 | 91334271  | 91339909  | 91344286  | 91344731 |
| 63 NA10863  | [2515685 chr2 | 2 | 94950036  | 94956556  | 6521   | 7   | 0.51789   | 0.056757 | 94949728  | 94950345  | 94956211  | 94956907 |
| 64 NA10863  | [2515685 chr2 | 2 | 94968296  | 94978008  | 9713   | 6   | 0.353141  | 0.060158 | 94968039  | 94968554  | 94977576  | 94978441 |
| 65 NA10863  | [2515685 chr2 | 2 | 97184386  | 97189733  | 5348   | 2   | -0.857714 | 0.107659 | 97182781  | 97185992  | 97186782  | 97196721 |
| 66 NA10863  | [2515685 chr2 | 2 | 106338419 | 106344320 | 5902   | 7   | -1.346359 | 0.072812 | 106337769 | 106339069 | 106344055 | 10634458 |
| 67 NA10863  | [2515685 chr2 | 2 | 111696774 | 111699147 | 2374   | 16  | 0.538444  | 0.036577 | 111696413 | 111697136 | 111698899 | 11169939 |
| 68 NA10863  | [2515685 chr2 | 2 | 126159437 | 126168349 | 8913   | 3   | -2.771819 | 0.133808 | 126158494 | 126160381 | 126168048 | 12616865 |
| 69 NA10863  | [2515685 chr2 | 2 | 129354604 | 129360182 | 5579   | 4   | -0.814988 | 0.084695 | 129354317 | 129354892 | 129357659 | 12936270 |
| 70 NA10863  | [2515685 chr2 | 2 | 130405124 | 130483330 | 78207  | 92  | -0.267235 | 0.01514  | 130405077 | 130405172 | 130483142 | 13048351 |
| 71 NA10863  | [2515685 chr2 | 2 | 131765083 | 131782932 | 17850  | 28  | -0.321363 | 0.027046 | 131749458 | 131768034 | 131782590 | 13178327 |
| 72 NA10863  | [2515685 chr2 | 2 | 131860137 | 131867908 | 7772   | 21  | -0.262318 | 0.029865 | 131858317 | 131861958 | 131867498 | 13186831 |
| 73 NA10863  | [2515685 chr2 | 2 | 131919064 | 131953962 | 34899  | 46  | -0.307699 | 0.021847 | 131918907 | 131919221 | 131953571 | 13195435 |
| 74 NA10863  | [2515685 chr2 | 2 | 132272745 | 132321431 | 48687  | 55  | -0.308266 | 0.019202 | 132271619 | 132273872 | 132321248 | 13232161 |
| 75 NA10863  | [2515685 chr2 | 2 | 132871605 | 132873051 | 1447   | 2   | 1.403258  | 0.139307 | 132871306 | 132871904 | 132872791 | 13287331 |
| 76 NA10863  | [2515685 chr2 | 2 | 153495552 | 153499409 | 3858   | 2   | 0.767206  | 0.120713 | 153484545 | 153498503 | 153498846 | 15349997 |
| 77 NA10863  | [2515685 chr2 | 2 | 153622711 | 153625256 | 2546   | 3   | 0.858106  | 0.089633 | 153621175 | 153624247 | 153625088 | 15362542 |
| 78 NA10863  | [2515685 chr2 | 2 | 170472402 | 170786426 | 314025 | 4   | -0.398581 | 0.067379 | 170383610 | 170475353 | 170783475 | 17085192 |
| 79 NA10863  | [2515685 chr2 | 2 | 242477094 | 242478812 | 1719   | 3   | -0.461225 | 0.077847 | 242476947 | 242477241 | 242478692 | 24247893 |
| 80 NA10863  | [2515685 chr2 | 2 | 242661256 | 242662332 | 1077   | 7   | 0.344273  | 0.052894 | 242661125 | 242661388 | 242662217 | 24266244 |
| 81 NA10863  | [2515685 chr2 | 2 | 242664580 | 242668683 | 4104   | 10  | 1.237591  | 0.041326 | 242664284 | 242664877 | 242668532 | 24266883 |
| 82 NA10863  | [2515685 chr3 | 3 | 204650    | 209394    | 4745   | 4   | 0.954623  | 0.074023 | 202918    | 206383    | 209009    | 209779   |
| 83 NA10863  | [2515685 chr3 | 3 | 1757211   | 1765703   | 8493   | 2   | 0.780576  | 0.114907 | 1756096   | 1758327   | 1762058   | 1797301  |
| 84 NA10863  | [2515685 chr3 | 3 | 6622786   | 6629620   | 6835   | 6   | -0.74155  | 0.059049 | 6492869   | 6626431   | 6629261   | 6629981  |
| 85 NA10863  | [2515685 chr3 | 3 | 37954149  | 37962148  | 8000   | 10  | -0.730708 | 0.046102 | 37953404  | 37954894  | 37961762  | 37962531 |
| 86 NA10863  | [2515685 chr3 | 3 | 61102339  | 61103470  | 1132   | 2   | -0.69516  | 0.099102 | 61102103  | 61102575  | 61103197  | 61103741 |
| 87 NA10863  | [2515685 chr3 | 3 | 89752413  | 89760941  | 8529   | 10  | -0.817504 | 0.053626 | 89752004  | 89752823  | 89760716  | 89761116 |
| 88 NA10863  | [2515685 chr3 | 3 | 105760262 | 105762355 | 2094   | 2   | -0.852551 | 0.120192 | 105759634 | 105760890 | 105761424 | 10576328 |
| 89 NA10863  | [2515685 chr3 | 3 | 133191392 | 133196576 | 5185   | 5   | -0.706712 | 0.066975 | 133190820 | 133191965 | 133195824 | 13319732 |
| 90 NA10863  | [2515685 chr3 | 3 | 150445844 | 150452241 | 6398   | 7   | -0.870014 | 0.059526 | 150444780 | 150446909 | 150451900 | 15045258 |
| 91 NA10863  | [2515685 chr3 | 3 | 163994592 | 164106273 | 111682 | 104 | 2.136658  | 0.025032 | 163993392 | 163995793 | 164106029 | 16410651 |
| 92 NA10863  | [2515685 chr3 | 3 | 178776474 | 178780177 | 3704   | 5   | -0.583997 | 0.075246 | 178775706 | 178777243 | 178779683 | 17878067 |
| 93 NA10863  | [2515685 chr3 | 3 | 192547312 | 192554331 | 7020   | 10  | 0.90371   | 0.052057 | 192546950 | 192547674 | 192554127 | 19255453 |
| 94 NA10863  | [2515685 chr3 | 3 | 196994475 | 197002965 | 8491   | 10  | 0.922822  | 0.047312 | 196994054 | 196994896 | 197002044 | 19700388 |
| 95 NA10863  | [2515685 chr3 | 3 | 198422794 | 198427408 | 4615   | 2   | 0.966429  | 0.129244 | 198422381 | 198423207 | 198423959 | 19843085 |
| 96 NA10863  | [2515685 chr3 | 3 | 199313925 | 199321616 | 7692   | 16  | 0.403914  | 0.033619 | 199313515 | 199314336 | 199321283 | 19932194 |
| 97 NA10863  | [2515685 chr4 | 4 | 245698    | 247001    | 1304   | 2   | -0.704408 | 0.114668 | 245505    | 245891    | 246778    | 247224   |
| 98 NA10863  | [2515685 chr4 | 4 | 772579    | 778360    | 5782   | 6   | -0.312166 | 0.059962 | 772146    | 773013    | 778077    | 778644   |
| 99 NA10863  | [2515685 chr4 | 4 | 3855414   | 3856383   | 970    | 2   | -0.488891 | 0.094468 | 3855199   | 3855629   | 3856194   | 3856573  |
| 100 NA10863 | [2515685 chr4 | 4 | 4255532   | 4266578   | 11047  | 9   | -0.283626 | 0.050153 | 4254415   | 4256649   | 4266266   | 4266897  |
| 101 NA10863 | [2515685 chr4 | 4 | 8740317   | 8757471   | 17155  | 26  | 0.605032  | 0.024048 | 8740049   | 8740586   | 8757086   | 8757857  |
| 102 NA10863 | [2515685 chr4 | 4 | 9001573   | 9046719   | 45147  | 86  | 0.592529  | 0.013119 | 9001243   | 9001903   | 9046129   | 9047305  |
| 103 NA10863 | [2515685 chr4 | 4 | 9812346   | 9813108   | 763    | 33  | 0.480475  | 0.020583 | 9812284   | 9812408   | 9812952   | 9813261  |
| 104 NA10863 | [2515685 chr4 | 4 | 9887220   | 9911397   | 24178  | 31  | 1.757216  | 0.040133 | 9886886   | 9887555   | 9910388   | 9912407  |



|             |               |   |           |           |        |     |                    |           |           |           |          |
|-------------|---------------|---|-----------|-----------|--------|-----|--------------------|-----------|-----------|-----------|----------|
| 105 NA10863 | [2515685 chr4 | 4 | 49080370  | 49080863  | 494    | 2   | -0.776548 0.100803 | 49079937  | 49080803  | 49080804  | 4908092: |
| 106 NA10863 | [2515685 chr4 | 4 | 49400450  | 49400601  | 152    | 2   | -0.776548 0.100803 | 49400386  | 49400515  | 49400516  | 4940068: |
| 107 NA10863 | [2515685 chr4 | 4 | 64522941  | 64543857  | 20917  | 20  | -0.727925 0.03722  | 64522682  | 64523201  | 64542552  | 6454516: |
| 108 NA10863 | [2515685 chr4 | 4 | 69203228  | 69319814  | 116587 | 70  | 1.09186 0.023128   | 69202934  | 69203523  | 69319569  | 6932005: |
| 109 NA10863 | [2515685 chr4 | 4 | 69319814  | 69341211  | 21398  | 18  | 0.366428 0.019466  | 69319569  | 69320059  | 69340966  | 6934145: |
| 110 NA10863 | [2515685 chr4 | 4 | 69347741  | 69365270  | 17530  | 21  | 0.366428 0.019466  | 69347112  | 69348370  | 69365129  | 6936541: |
| 111 NA10863 | [2515685 chr4 | 4 | 69672033  | 69717280  | 45248  | 52  | 0.33195 0.018422   | 69671975  | 69672092  | 69717139  | 6971742: |
| 112 NA10863 | [2515685 chr4 | 4 | 70206173  | 70418701  | 212529 | 219 | 0.341595 0.010189  | 70205193  | 70207154  | 70418467  | 7041893: |
| 113 NA10863 | [2515685 chr4 | 4 | 89377945  | 89441067  | 63123  | 64  | 0.468837 0.018923  | 89377545  | 89378346  | 89440563  | 8944157: |
| 114 NA10863 | [2515685 chr4 | 4 | 92289331  | 92292975  | 3645   | 2   | -0.888761 0.122303 | 92199954  | 92292396  | 92292781  | 9229317: |
| 115 NA10863 | [2515685 chr4 | 4 | 125304905 | 125305983 | 1079   | 2   | 0.643043 0.101144  | 125304587 | 125305223 | 125305732 | 12530623 |
| 116 NA10863 | [2515685 chr4 | 4 | 133536193 | 133540723 | 4531   | 3   | -0.596707 0.099039 | 133531398 | 133539258 | 133540462 | 13354098 |
| 117 NA10863 | [2515685 chr4 | 4 | 138449561 | 138457787 | 8227   | 7   | -4.45465 0.128234  | 138448993 | 138450130 | 138457283 | 13845829 |
| 118 NA10863 | [2515685 chr4 | 4 | 138537751 | 138549906 | 12156  | 14  | 0.94724 0.045875   | 138537443 | 138538059 | 138547414 | 13855239 |
| 119 NA10863 | [2515685 chr4 | 4 | 142588136 | 142590500 | 2365   | 4   | -0.700991 0.079832 | 142587774 | 142588498 | 142590303 | 14259069 |
| 120 NA10863 | [2515685 chr4 | 4 | 162237272 | 162242562 | 5291   | 8   | 1.029252 0.055439  | 162236487 | 162238058 | 162242381 | 16224274 |
| 121 NA10863 | [2515685 chr4 | 4 | 169184442 | 169368370 | 183929 | 162 | 0.808813 0.012357  | 169184090 | 169184794 | 169366713 | 16937002 |
| 122 NA10863 | [2515685 chr4 | 4 | 172750241 | 172755216 | 4976   | 2   | -3.481839 0.290789 | 172748887 | 172751596 | 172753256 | 17275717 |
| 123 NA10863 | [2515685 chr4 | 4 | 173363594 | 173367718 | 4125   | 6   | -3.056041 0.105564 | 173362583 | 173364606 | 173367283 | 17336815 |
| 124 NA10863 | [2515685 chr4 | 4 | 173799832 | 173807320 | 7489   | 6   | -2.968223 0.130294 | 173799464 | 173800201 | 173804255 | 17381134 |
| 125 NA10863 | [2515685 chr4 | 4 | 185533276 | 185534552 | 1277   | 2   | 0.940168 0.129458  | 185532696 | 185533857 | 185534159 | 18553495 |
| 126 NA10863 | [2515685 chr4 | 4 | 185535274 | 185544849 | 9576   | 9   | 0.989909 0.025776  | 185534955 | 185535593 | 185543276 | 18554642 |
| 127 NA10863 | [2515685 chr4 | 4 | 187728494 | 187732907 | 4414   | 15  | 3.07364 0.066174   | 187728193 | 187728795 | 187732541 | 18773327 |
| 128 NA10863 | [2515685 chr4 | 4 | 189812041 | 189814133 | 2093   | 2   | -0.832274 0.126167 | 189811777 | 189812306 | 189813742 | 18981452 |
| 129 NA10863 | [2515685 chr4 | 4 | 190528602 | 190533163 | 4562   | 21  | -3.114661 0.054749 | 190528058 | 190529146 | 190531664 | 19053466 |
| 130 NA10863 | [2515685 chr4 | 4 | 191142404 | 191143596 | 1193   | 3   | -0.527913 0.079773 | 191142135 | 191142673 | 191143215 | 19114397 |
| 131 NA10863 | [2515685 chr4 | 4 | 191341809 | 191387775 | 45967  | 17  | -0.270688 0.032197 | 191340689 | 191342929 | 191384710 | 19139251 |
| 132 NA10863 | [2515685 chr5 | 5 | 520743    | 521684    | 942    | 5   | 0.539832 0.073814  | 520428    | 521059    | 521427    | 521942   |
| 133 NA10863 | [2515685 chr5 | 5 | 548772    | 549982    | 1211   | 2   | 0.714109 0.115002  | 548335    | 549210    | 549745    | 550215   |
| 134 NA10863 | [2515685 chr5 | 5 | 731749    | 904333    | 172585 | 159 | -0.320596 0.011262 | 731185    | 732314    | 904042    | 904624   |
| 135 NA10863 | [2515685 chr5 | 5 | 12863961  | 12873512  | 9552   | 14  | -2.872578 0.076521 | 12863778  | 12864144  | 12873198  | 12873827 |
| 136 NA10863 | [2515685 chr5 | 5 | 13253903  | 13391372  | 137470 | 135 | -0.751828 0.013837 | 13248440  | 13257094  | 13390719  | 1339202: |
| 137 NA10863 | [2515685 chr5 | 5 | 21307535  | 21426153  | 118619 | 183 | 0.316223 0.010047  | 21307127  | 21307943  | 21425562  | 2142674: |
| 138 NA10863 | [2515685 chr5 | 5 | 21514574  | 21533400  | 18827  | 43  | -0.358317 0.020385 | 21513711  | 21515438  | 21533107  | 2153369: |
| 139 NA10863 | [2515685 chr5 | 5 | 21539354  | 21557224  | 17871  | 35  | 0.26569 0.022385   | 21538825  | 21539883  | 21556706  | 2155774: |
| 140 NA10863 | [2515685 chr5 | 5 | 21971730  | 22049242  | 77513  | 120 | 0.26165 0.012653   | 21971258  | 21972202  | 22048833  | 2204965: |
| 141 NA10863 | [2515685 chr5 | 5 | 22161042  | 22166982  | 5941   | 8   | 0.281234 0.055714  | 22160580  | 22161504  | 22166620  | 2216734: |
| 142 NA10863 | [2515685 chr5 | 5 | 26831997  | 26837938  | 5942   | 6   | 0.768976 0.066026  | 26829858  | 26834136  | 26837469  | 2683840: |
| 143 NA10863 | [2515685 chr5 | 5 | 34214373  | 34232271  | 17899  | 44  | -0.375578 0.020606 | 34214196  | 34214550  | 34231243  | 3423330: |
| 144 NA10863 | [2515685 chr5 | 5 | 34232271  | 34242460  | 10190  | 19  | 0.281584 0.012898  | 34231243  | 34233300  | 34242396  | 3424252: |
| 145 NA10863 | [2515685 chr5 | 5 | 34243324  | 34290723  | 47400  | 81  | 0.281584 0.012898  | 34243277  | 34243371  | 34289862  | 3429158: |
| 146 NA10863 | [2515685 chr5 | 5 | 57359558  | 57369858  | 10301  | 9   | 1.881677 0.072987  | 57359213  | 57359904  | 57367789  | 5737192: |
| 147 NA10863 | [2515685 chr5 | 5 | 68863051  | 68961866  | 98816  | 179 | 0.274354 0.010297  | 68862708  | 68863394  | 68960721  | 6896301: |
| 148 NA10863 | [2515685 chr5 | 5 | 68961866  | 68988617  | 26752  | 68  | -0.319449 0.015737 | 68960721  | 68963012  | 68987741  | 6898949: |
| 149 NA10863 | [2515685 chr5 | 5 | 69002370  | 69031453  | 29084  | 64  | 0.337929 0.015098  | 69002057  | 69002684  | 69031106  | 6903180: |
| 150 NA10863 | [2515685 chr5 | 5 | 69043794  | 69174639  | 130846 | 320 | 0.407656 0.00706   | 69043609  | 69043980  | 69174460  | 6917481: |
| 151 NA10863 | [2515685 chr5 | 5 | 69186971  | 69216118  | 29148  | 66  | 0.329779 0.014962  | 69186659  | 69187283  | 69215664  | 6921657: |
| 152 NA10863 | [2515685 chr5 | 5 | 69226683  | 69248016  | 21334  | 54  | -0.322593 0.017701 | 69226508  | 69226858  | 69248016  | 6924801: |
| 153 NA10863 | [2515685 chr5 | 5 | 69274215  | 69308499  | 34285  | 67  | 0.332851 0.015415  | 69274189  | 69274241  | 69308392  | 6930860: |
| 154 NA10863 | [2515685 chr5 | 5 | 69388384  | 69404835  | 16452  | 21  | 0.395813 0.026234  | 69386439  | 69390329  | 69404157  | 6940551: |
| 155 NA10863 | [2515685 chr5 | 5 | 69404835  | 69411352  | 6518   | 6   | 0.912292 0.051559  | 69404157  | 69405513  | 69410702  | 6941200: |
| 156 NA10863 | [2515685 chr5 | 5 | 69459890  | 69464161  | 4272   | 13  | 0.408865 0.03609   | 69459629  | 69460152  | 69464004  | 6946431: |
| 157 NA10863 | [2515685 chr5 | 5 | 69474557  | 69507099  | 32543  | 65  | 0.356771 0.015578  | 69474413  | 69474701  | 69507074  | 6950712: |
| 158 NA10863 | [2515685 chr5 | 5 | 69533449  | 69569414  | 35966  | 91  | -0.320484 0.013447 | 69533271  | 69533627  | 69569234  | 6956959: |
| 159 NA10863 | [2515685 chr5 | 5 | 69583053  | 69744071  | 161019 | 359 | 0.383314 0.006617  | 69582615  | 69583492  | 69743961  | 6974418: |

|             |               |   |           |           |        |     |           |          |           |           |           |          |
|-------------|---------------|---|-----------|-----------|--------|-----|-----------|----------|-----------|-----------|-----------|----------|
| 160 NA10863 | [2515685 chr5 | 5 | 69817505  | 69865798  | 48294  | 120 | -0.310757 | 0.011923 | 69816360  | 69818651  | 69865618  | 6986597! |
| 161 NA10863 | [2515685 chr5 | 5 | 69879636  | 70090205  | 210570 | 453 | 0.367823  | 0.005842 | 69879413  | 69879859  | 70089767  | 7009064: |
| 162 NA10863 | [2515685 chr5 | 5 | 70102565  | 70123067  | 20503  | 52  | -0.319499 | 0.017929 | 70102390  | 70102740  | 70123067  | 7012306: |
| 163 NA10863 | [2515685 chr5 | 5 | 70154263  | 70156324  | 2062   | 6   | 0.498732  | 0.048271 | 70154228  | 70154298  | 70156079  | 7015656! |
| 164 NA10863 | [2515685 chr5 | 5 | 70263808  | 70280260  | 16453  | 21  | 0.397442  | 0.026305 | 70261863  | 70265753  | 70279582  | 7028093! |
| 165 NA10863 | [2515685 chr5 | 5 | 70280260  | 70286789  | 6530   | 6   | 0.862099  | 0.05095  | 70279582  | 70280938  | 70286122  | 7028745! |
| 166 NA10863 | [2515685 chr5 | 5 | 70402640  | 70415506  | 12867  | 25  | 0.444689  | 0.022118 | 70402418  | 70402863  | 70415389  | 7041562- |
| 167 NA10863 | [2515685 chr5 | 5 | 70417349  | 70426554  | 9206   | 16  | 0.444689  | 0.022118 | 70416846  | 70417852  | 70425419  | 7042768! |
| 168 NA10863 | [2515685 chr5 | 5 | 70460209  | 70464475  | 4267   | 12  | 0.410791  | 0.037644 | 70459948  | 70460471  | 70464318  | 7046463: |
| 169 NA10863 | [2515685 chr5 | 5 | 70500248  | 70502486  | 2239   | 7   | 0.49878   | 0.045509 | 70500081  | 70500415  | 70502451  | 7050252: |
| 170 NA10863 | [2515685 chr5 | 5 | 70533834  | 70569756  | 35923  | 90  | -0.322035 | 0.013588 | 70533656  | 70534012  | 70569576  | 7056993: |
| 171 NA10863 | [2515685 chr5 | 5 | 70581254  | 70610698  | 29445  | 62  | 0.327093  | 0.015242 | 70580814  | 70581694  | 70610386  | 7061101! |
| 172 NA10863 | [2515685 chr5 | 5 | 70623027  | 70687844  | 64818  | 149 | 0.395787  | 0.010342 | 70622847  | 70623208  | 70687830  | 7068785! |
| 173 NA10863 | [2515685 chr5 | 5 | 71985085  | 71987802  | 2718   | 4   | -0.445739 | 0.07113  | 71984707  | 71985463  | 71987401  | 7198820- |
| 174 NA10863 | [2515685 chr5 | 5 | 81459214  | 81466054  | 6841   | 2   | -1.380635 | 0.120389 | 81455614  | 81462405  | 81462863  | 8147028! |
| 175 NA10863 | [2515685 chr5 | 5 | 93928460  | 93933101  | 4642   | 4   | -0.518846 | 0.080271 | 93927706  | 93929215  | 93931984  | 9393421! |
| 176 NA10863 | [2515685 chr5 | 5 | 98867127  | 98870861  | 3735   | 2   | -1.627692 | 0.164888 | 98864129  | 98870125  | 98870667  | 9887105! |
| 177 NA10863 | [2515685 chr5 | 5 | 98883915  | 98900556  | 16642  | 34  | -0.298731 | 0.024532 | 98882429  | 98885401  | 98900309  | 9890080: |
| 178 NA10863 | [2515685 chr5 | 5 | 99409393  | 99419037  | 9645   | 13  | -0.792171 | 0.042661 | 99408997  | 99409789  | 99418328  | 9941974! |
| 179 NA10863 | [2515685 chr5 | 5 | 99424905  | 99436061  | 11157  | 18  | -0.318914 | 0.032066 | 99424257  | 99425553  | 99433487  | 9943863! |
| 180 NA10863 | [2515685 chr5 | 5 | 99738581  | 99756720  | 18140  | 38  | -0.329651 | 0.023201 | 99738184  | 99738978  | 99756474  | 9975696! |
| 181 NA10863 | [2515685 chr5 | 5 | 122649189 | 122651412 | 2224   | 3   | 0.449059  | 0.089305 | 122648933 | 122649446 | 122650032 | 12265279 |
| 182 NA10863 | [2515685 chr5 | 5 | 137835848 | 137844134 | 8287   | 7   | 0.600043  | 0.061724 | 137835611 | 137836085 | 137843310 | 13784495 |
| 183 NA10863 | [2515685 chr5 | 5 | 140203081 | 140218928 | 15848  | 20  | 1.972497  | 0.049673 | 140202344 | 140203819 | 140218508 | 14021934 |
| 184 NA10863 | [2515685 chr5 | 5 | 140534849 | 140540106 | 5258   | 5   | 0.790319  | 0.069455 | 140534700 | 140534999 | 140539007 | 14054120 |
| 185 NA10863 | [2515685 chr5 | 5 | 175547133 | 175555348 | 8216   | 11  | -0.273162 | 0.042469 | 175546842 | 175547424 | 17554929  | 17555576 |
| 186 NA10863 | [2515685 chr5 | 5 | 178994494 | 178994971 | 478    | 2   | -0.518008 | 0.093568 | 178994223 | 178994766 | 178994768 | 17899517 |
| 187 NA10863 | [2515685 chr5 | 5 | 179016786 | 179017263 | 478    | 2   | -0.518008 | 0.093568 | 179016582 | 179016990 | 179016992 | 17901753 |
| 188 NA10863 | [2515685 chr5 | 5 | 180275137 | 180280226 | 5090   | 5   | 0.511708  | 0.072687 | 180273651 | 180276623 | 180277035 | 18028376 |
| 189 NA10863 | [2515685 chr5 | 5 | 180307611 | 180309236 | 1626   | 4   | -0.443636 | 0.069939 | 180307260 | 180307962 | 180309103 | 18030937 |
| 190 NA10863 | [2515685 chr5 | 5 | 180309823 | 180363417 | 53595  | 51  | -1.014788 | 0.025319 | 180309690 | 180309956 | 180363120 | 1803637! |
| 191 NA10863 | [2515685 chr5 | 5 | 180765422 | 180821687 | 56266  | 53  | -0.326945 | 0.020387 | 180765409 | 180765436 | 180820892 | 18082248 |
| 192 NA10863 | [2515685 chr6 | 6 | 3163      | 18689     | 15527  | 4   | 0.640899  | 0.068905 | 1         | 6325      | 15699     | 21709    |
| 193 NA10863 | [2515685 chr6 | 6 | 235965    | 324395    | 88431  | 101 | 0.333837  | 0.014324 | 235368    | 236563    | 323926    | 324865   |
| 194 NA10863 | [2515685 chr6 | 6 | 10575525  | 10639044  | 63520  | 54  | -0.802584 | 0.02087  | 10574226  | 10576825  | 10638633  | 1063945! |
| 195 NA10863 | [2515685 chr6 | 6 | 26841915  | 26876130  | 34216  | 68  | -0.273148 | 0.017739 | 26841726  | 26842104  | 26875942  | 2687631! |
| 196 NA10863 | [2515685 chr6 | 6 | 26959328  | 26976094  | 16767  | 36  | -0.348703 | 0.023454 | 26958921  | 26959735  | 26975842  | 2697634: |
| 197 NA10863 | [2515685 chr6 | 6 | 26978860  | 27078178  | 99319  | 156 | 0.264129  | 0.010939 | 26977811  | 26979909  | 27077814  | 2707854: |
| 198 NA10863 | [2515685 chr6 | 6 | 29606523  | 29608790  | 2268   | 3   | -0.42338  | 0.08193  | 29606307  | 29606739  | 29608263  | 2960931! |
| 199 NA10863 | [2515685 chr6 | 6 | 29958572  | 30001248  | 42677  | 36  | 0.406434  | 0.022318 | 29957670  | 29959474  | 30001018  | 3000147! |
| 200 NA10863 | [2515685 chr6 | 6 | 30005092  | 30010672  | 5581   | 4   | 0.406434  | 0.022318 | 30004822  | 30005363  | 30010262  | 3001108: |
| 201 NA10863 | [2515685 chr6 | 6 | 30024048  | 30026465  | 2418   | 2   | -0.778339 | 0.10905  | 30022687  | 30025409  | 30026203  | 3002672: |
| 202 NA10863 | [2515685 chr6 | 6 | 31344330  | 31346265  | 1936   | 4   | -0.785902 | 0.068544 | 31344063  | 31344598  | 31345931  | 3134659! |
| 203 NA10863 | [2515685 chr6 | 6 | 31430392  | 31431299  | 908    | 2   | -0.564758 | 0.106746 | 31430092  | 31430692  | 31431029  | 3143156! |
| 204 NA10863 | [2515685 chr6 | 6 | 32056890  | 32121527  | 64638  | 79  | -0.345026 | 0.014566 | 32056644  | 32057137  | 32121053  | 3212200: |
| 205 NA10863 | [2515685 chr6 | 6 | 32565102  | 32586862  | 21761  | 3   | -0.863037 | 0.141882 | 32564888  | 32565316  | 32586127  | 3258759  |
| 206 NA10863 | [2515685 chr6 | 6 | 32605125  | 32617042  | 11918  | 9   | -0.346564 | 0.047021 | 32604923  | 32605328  | 32613543  | 3262657  |
| 207 NA10863 | [2515685 chr6 | 6 | 32653862  | 32654720  | 859    | 2   | 1.233451  | 0.166495 | 32653679  | 32654046  | 32654460  | 3265498! |
| 208 NA10863 | [2515685 chr6 | 6 | 32666229  | 32667673  | 1445   | 3   | 0.603579  | 0.081232 | 32665899  | 32666560  | 32667507  | 3266783! |
| 209 NA10863 | [2515685 chr6 | 6 | 32702716  | 32705737  | 3022   | 3   | -0.532256 | 0.076475 | 32702285  | 32703148  | 32704019  | 3270745! |
| 210 NA10863 | [2515685 chr6 | 6 | 32712337  | 32760272  | 47936  | 43  | 0.373639  | 0.023852 | 32712193  | 32712482  | 32759956  | 3276058! |
| 211 NA10863 | [2515685 chr6 | 6 | 32799932  | 32801270  | 1339   | 2   | 1.019827  | 0.124206 | 32799289  | 32800576  | 32800912  | 3280162! |
| 212 NA10863 | [2515685 chr6 | 6 | 54036900  | 54042384  | 5485   | 5   | 2.637769  | 0.126207 | 54036573  | 54037227  | 54041771  | 5404299! |
| 213 NA10863 | [2515685 chr6 | 6 | 58358499  | 58376078  | 17580  | 35  | -0.331062 | 0.02309  | 58358474  | 58358525  | 58375178  | 5837697! |
| 214 NA10863 | [2515685 chr6 | 6 | 74648985  | 74658746  | 9762   | 11  | -0.726532 | 0.04689  | 74648748  | 74649222  | 74655247  | 7466226: |

|             |               |   |           |           |       |    |           |          |           |           |           |           |
|-------------|---------------|---|-----------|-----------|-------|----|-----------|----------|-----------|-----------|-----------|-----------|
| 215 NA10863 | [2515685 chr6 | 6 | 79023318  | 79093263  | 69946 | 70 | 0.813916  | 0.018777 | 79022028  | 79024609  | 79091909  | 79094611  |
| 216 NA10863 | [2515685 chr6 | 6 | 81338148  | 81350271  | 12124 | 11 | -3.445376 | 0.088441 | 81334276  | 81341647  | 81350013  | 81350531  |
| 217 NA10863 | [2515685 chr6 | 6 | 103844685 | 103871201 | 26517 | 17 | 2.233399  | 0.064695 | 103844347 | 103845023 | 103868241 | 10387416  |
| 218 NA10863 | [2515685 chr6 | 6 | 120670490 | 120671916 | 1427  | 2  | 0.664739  | 0.106399 | 120669295 | 120671686 | 120671725 | 12067210  |
| 219 NA10863 | [2515685 chr6 | 6 | 168534190 | 168537360 | 3171  | 14 | -0.270605 | 0.032085 | 168533806 | 168534574 | 168537100 | 16853762  |
| 220 NA10863 | [2515685 chr6 | 6 | 170603879 | 170604666 | 788   | 2  | -2.385849 | 0.141865 | 170603541 | 170604217 | 170604339 | 17060499  |
| 221 NA10863 | [2515685 chr6 | 6 | 170625506 | 170627028 | 1523  | 3  | 2.340731  | 0.134459 | 170625015 | 170625997 | 170626579 | 17062747  |
| 222 NA10863 | [2515685 chr6 | 6 | 170684555 | 170687261 | 2707  | 6  | -0.692329 | 0.062227 | 170684170 | 170684940 | 170686870 | 17068765  |
| 223 NA10863 | [2515685 chr6 | 6 | 170908090 | 170962341 | 54252 | 42 | -0.318215 | 0.022799 | 170908077 | 170908104 | 170961546 | 17096313  |
| 224 NA10863 | [2515685 chr7 | 7 | 113212    | 116281    | 3070  | 13 | -0.258276 | 0.044585 | 113146    | 113279    | 116273    | 116290    |
| 225 NA10863 | [2515685 chr7 | 7 | 1290683   | 1303659   | 12977 | 18 | -0.271827 | 0.03467  | 1290278   | 1291089   | 1303144   | 1304174   |
| 226 NA10863 | [2515685 chr7 | 7 | 3384111   | 3392457   | 8347  | 8  | 0.868446  | 0.057558 | 3383451   | 3384772   | 3390107   | 3395611   |
| 227 NA10863 | [2515685 chr7 | 7 | 8905495   | 9004182   | 98688 | 97 | -0.789492 | 0.016344 | 8901171   | 8907845   | 9003803   | 9004567   |
| 228 NA10863 | [2515685 chr7 | 7 | 14024131  | 14025556  | 1426  | 5  | 0.488062  | 0.071588 | 14023511  | 14024751  | 14025262  | 14025851  |
| 229 NA10863 | [2515685 chr7 | 7 | 56649338  | 56651954  | 2617  | 2  | -0.605897 | 0.116696 | 56649103  | 56649574  | 56651681  | 56652221  |
| 230 NA10863 | [2515685 chr7 | 7 | 62254472  | 62255088  | 617   | 4  | 0.613913  | 0.071025 | 62254309  | 62254635  | 62254924  | 62255252  |
| 231 NA10863 | [2515685 chr7 | 7 | 62302079  | 62302696  | 618   | 4  | 0.613907  | 0.071025 | 62301915  | 62302243  | 62302533  | 62302851  |
| 232 NA10863 | [2515685 chr7 | 7 | 64027541  | 64046357  | 18817 | 50 | -0.266233 | 0.020074 | 64027276  | 64027806  | 64046143  | 64046577  |
| 233 NA10863 | [2515685 chr7 | 7 | 64463334  | 64482040  | 18707 | 48 | -0.266113 | 0.02039  | 64462999  | 64463669  | 64481765  | 64482311  |
| 234 NA10863 | [2515685 chr7 | 7 | 64538610  | 64557415  | 18806 | 49 | -0.262579 | 0.020123 | 64537873  | 64539348  | 64557080  | 64557751  |
| 235 NA10863 | [2515685 chr7 | 7 | 69869623  | 69871056  | 1434  | 2  | 2.526691  | 0.149175 | 69869269  | 69869978  | 69870420  | 69871691  |
| 236 NA10863 | [2515685 chr7 | 7 | 71487853  | 71491635  | 3783  | 2  | -0.519387 | 0.097832 | 71487606  | 71488100  | 71489994  | 71493277  |
| 237 NA10863 | [2515685 chr7 | 7 | 71858493  | 71859326  | 834   | 2  | -0.640705 | 0.083609 | 71858284  | 71858703  | 71858719  | 71859931  |
| 238 NA10863 | [2515685 chr7 | 7 | 72028825  | 72031305  | 2481  | 6  | -0.268929 | 0.053214 | 72028799  | 72028852  | 72031149  | 72031461  |
| 239 NA10863 | [2515685 chr7 | 7 | 72156868  | 72157708  | 841   | 2  | -0.640701 | 0.083608 | 72156657  | 72157079  | 72157095  | 72158327  |
| 240 NA10863 | [2515685 chr7 | 7 | 74080424  | 74082904  | 2481  | 6  | -0.268929 | 0.053214 | 74080268  | 74080581  | 74082878  | 74082937  |
| 241 NA10863 | [2515685 chr7 | 7 | 74695370  | 74696139  | 770   | 3  | -0.591135 | 0.074045 | 74695306  | 74695434  | 74695977  | 74696301  |
| 242 NA10863 | [2515685 chr7 | 7 | 76173835  | 76175647  | 1813  | 2  | 0.5801    | 0.103538 | 76173564  | 76174106  | 76174852  | 76176441  |
| 243 NA10863 | [2515685 chr7 | 7 | 89455601  | 89456632  | 1032  | 2  | 3.60884   | 0.192785 | 89455373  | 89455830  | 89456225  | 89457031  |
| 244 NA10863 | [2515685 chr7 | 7 | 92971481  | 92976895  | 5415  | 4  | 0.655063  | 0.085471 | 92971060  | 92971903  | 92975569  | 92978227  |
| 245 NA10863 | [2515685 chr7 | 7 | 97032078  | 97047344  | 15267 | 17 | -0.662018 | 0.039489 | 97031625  | 97032531  | 97046973  | 97047711  |
| 246 NA10863 | [2515685 chr7 | 7 | 101732915 | 101746499 | 13585 | 15 | 0.26799   | 0.03409  | 101732009 | 101733821 | 101745864 | 10174713  |
| 247 NA10863 | [2515685 chr7 | 7 | 101750729 | 101759251 | 8523  | 11 | 0.35605   | 0.037177 | 101750058 | 101751400 | 101759229 | 101759727 |
| 248 NA10863 | [2515685 chr7 | 7 | 101849923 | 101858816 | 8894  | 11 | 0.35605   | 0.037177 | 101849252 | 101850594 | 101858540 | 10185909  |
| 249 NA10863 | [2515685 chr7 | 7 | 109034784 | 109048749 | 13966 | 10 | 1.573877  | 0.064799 | 109024063 | 109037134 | 109046953 | 10905054  |
| 250 NA10863 | [2515685 chr7 | 7 | 109776378 | 109782655 | 6278  | 5  | -3.969358 | 0.165234 | 109775821 | 109776936 | 109782301 | 10978301  |
| 251 NA10863 | [2515685 chr7 | 7 | 125639507 | 125644775 | 5269  | 6  | -0.784103 | 0.074698 | 125639054 | 125639961 | 125644046 | 12564550  |
| 252 NA10863 | [2515685 chr7 | 7 | 141194455 | 141199500 | 5046  | 2  | -0.609051 | 0.114573 | 141194130 | 141194780 | 141199191 | 141199811 |
| 253 NA10863 | [2515685 chr7 | 7 | 141218636 | 141247657 | 29022 | 30 | -0.682826 | 0.029375 | 141217990 | 141219282 | 141247027 | 14124828  |
| 254 NA10863 | [2515685 chr7 | 7 | 141505136 | 141521690 | 16555 | 20 | 0.68773   | 0.035413 | 141504428 | 141505844 | 141521412 | 14152196  |
| 255 NA10863 | [2515685 chr7 | 7 | 141960848 | 141993247 | 32400 | 38 | -0.33637  | 0.023679 | 141960004 | 141961693 | 141992651 | 14199384  |
| 256 NA10863 | [2515685 chr7 | 7 | 142735088 | 142741695 | 6608  | 10 | 0.360314  | 0.047967 | 142734133 | 142736044 | 142741287 | 14274210  |
| 257 NA10863 | [2515685 chr7 | 7 | 142750083 | 142758373 | 8291  | 4  | 0.422865  | 0.067494 | 142749563 | 142750603 | 142758196 | 14275855  |
| 258 NA10863 | [2515685 chr7 | 7 | 142799053 | 142809985 | 10933 | 12 | 0.341602  | 0.043121 | 142796326 | 142801403 | 142809724 | 14281024  |
| 259 NA10863 | [2515685 chr7 | 7 | 142819821 | 142828015 | 8195  | 13 | 0.362611  | 0.041563 | 142819476 | 142820166 | 142827707 | 14282832  |
| 260 NA10863 | [2515685 chr7 | 7 | 142852648 | 142854187 | 1540  | 3  | 0.479086  | 0.076751 | 142852548 | 142852749 | 142853734 | 14285464  |
| 261 NA10863 | [2515685 chr7 | 7 | 142919756 | 142928045 | 8290  | 4  | 0.422866  | 0.067494 | 142919580 | 142919933 | 142927525 | 14292856  |
| 262 NA10863 | [2515685 chr7 | 7 | 142936330 | 142944772 | 8443  | 12 | 0.328204  | 0.041623 | 142936028 | 142936632 | 142944596 | 14294494  |
| 263 NA10863 | [2515685 chr7 | 7 | 143000518 | 143009302 | 8785  | 12 | 0.341602  | 0.043121 | 143000258 | 143000779 | 143009099 | 14300950  |
| 264 NA10863 | [2515685 chr7 | 7 | 143346235 | 143348067 | 1833  | 6  | -0.373964 | 0.056634 | 143345827 | 143346643 | 143347806 | 14334832  |
| 265 NA10863 | [2515685 chr7 | 7 | 143472403 | 143475906 | 3504  | 7  | -0.350594 | 0.051253 | 143472142 | 143472664 | 143475779 | 14347603  |
| 266 NA10863 | [2515685 chr7 | 7 | 149285428 | 149287696 | 2269  | 3  | 0.559918  | 0.082915 | 149285181 | 149285676 | 149286346 | 14928904  |
| 267 NA10863 | [2515685 chr7 | 7 | 152948945 | 152950784 | 1840  | 2  | 0.535942  | 0.096151 | 152947501 | 152950389 | 152950517 | 15295105  |
| 268 NA10863 | [2515685 chr7 | 7 | 156976112 | 156978464 | 2353  | 2  | 1.020483  | 0.107231 | 156975812 | 156976413 | 156977896 | 15697903  |
| 269 NA10863 | [2515685 chr7 | 7 | 157017083 | 157018249 | 1167  | 2  | 0.628396  | 0.116384 | 157016604 | 157017563 | 157017820 | 15701867  |

|             |                |    |           |           |         |      |           |          |           |           |           |           |
|-------------|----------------|----|-----------|-----------|---------|------|-----------|----------|-----------|-----------|-----------|-----------|
| 270 NA10863 | [2515685 chr7  | 7  | 158617060 | 158624378 | 7319    | 6    | 0.824223  | 0.068304 | 158616763 | 158617357 | 158622028 | 15862672  |
| 271 NA10863 | [2515685 chr8  | 8  | 11588     | 66801     | 55214   | 46   | -0.314905 | 0.021887 | 10326     | 12850     | 66788     | 66815     |
| 272 NA10863 | [2515685 chr8  | 8  | 2202770   | 2203520   | 751     | 3    | -1.144115 | 0.079168 | 2202506   | 2203034   | 2203382   | 2203659   |
| 273 NA10863 | [2515685 chr8  | 8  | 2238735   | 2253792   | 15058   | 10   | 0.775322  | 0.05088  | 2233839   | 2241488   | 2251039   | 2257526   |
| 274 NA10863 | [2515685 chr8  | 8  | 4110204   | 4112526   | 2323    | 2    | 3.033542  | 0.205925 | 4109692   | 4110717   | 4112031   | 4113027   |
| 275 NA10863 | [2515685 chr8  | 8  | 5582875   | 5594011   | 11137   | 9    | 0.794933  | 0.04881  | 5582615   | 5583135   | 5592820   | 5595203   |
| 276 NA10863 | [2515685 chr8  | 8  | 7177227   | 7187950   | 10724   | 31   | 0.506928  | 0.026798 | 7177183   | 7177271   | 7187698   | 7188207   |
| 277 NA10863 | [2515685 chr8  | 8  | 7367274   | 7367924   | 651     | 2    | 0.871012  | 0.110159 | 7367060   | 7367488   | 7367568   | 7368280   |
| 278 NA10863 | [2515685 chr8  | 8  | 7692950   | 7693600   | 651     | 2    | 0.871051  | 0.110162 | 7692595   | 7693306   | 7693386   | 7693819   |
| 279 NA10863 | [2515685 chr8  | 8  | 7862281   | 7873897   | 11617   | 34   | 0.500815  | 0.024894 | 7862030   | 7862533   | 7873605   | 7874190   |
| 280 NA10863 | [2515685 chr8  | 8  | 12023134  | 12034819  | 11686   | 32   | 0.481605  | 0.026546 | 12022997  | 12023272  | 12034665  | 12034977  |
| 281 NA10863 | [2515685 chr8  | 8  | 12276602  | 12299537  | 22936   | 33   | 0.264274  | 0.023977 | 12276206  | 12276998  | 12299086  | 12299981  |
| 282 NA10863 | [2515685 chr8  | 8  | 14674895  | 15706527  | 1031633 | 1026 | -0.800189 | 0.004974 | 14674267  | 14675524  | 15704951  | 15708107  |
| 283 NA10863 | [2515685 chr8  | 8  | 18894962  | 18909319  | 14358   | 15   | -0.835913 | 0.040838 | 18894422  | 18895503  | 18908340  | 18910291  |
| 284 NA10863 | [2515685 chr8  | 8  | 20022286  | 20024771  | 2486    | 2    | -1.132612 | 0.128854 | 20021082  | 20023491  | 20024338  | 20025207  |
| 285 NA10863 | [2515685 chr8  | 8  | 49081430  | 49084499  | 3070    | 2    | 0.806053  | 0.114832 | 49079497  | 49083364  | 49084089  | 49084910  |
| 286 NA10863 | [2515685 chr8  | 8  | 51193670  | 51201152  | 7483    | 11   | -0.796046 | 0.048983 | 51193335  | 51194005  | 51200867  | 51201431  |
| 287 NA10863 | [2515685 chr8  | 8  | 54001807  | 54002677  | 871     | 2    | -0.866217 | 0.115881 | 54001673  | 54001942  | 54002470  | 54002881  |
| 288 NA10863 | [2515685 chr8  | 8  | 58278355  | 58287850  | 9496    | 8    | 0.538263  | 0.046506 | 58277116  | 58279595  | 58287616  | 58288087  |
| 289 NA10863 | [2515685 chr8  | 8  | 85423649  | 85431920  | 8272    | 7    | 0.941593  | 0.058974 | 85423043  | 85424256  | 85431347  | 85432497  |
| 290 NA10863 | [2515685 chr8  | 8  | 86742169  | 86910255  | 168087  | 99   | 0.633101  | 0.012811 | 86741757  | 86742581  | 86910002  | 86910509  |
| 291 NA10863 | [2515685 chr8  | 8  | 120222661 | 120229952 | 7292    | 6    | 0.904346  | 0.063758 | 120218251 | 120225414 | 12029434  | 120230471 |
| 292 NA10863 | [2515685 chr8  | 8  | 144782811 | 144785960 | 3150    | 2    | 0.520409  | 0.101726 | 144771440 | 144785564 | 144785821 | 144786097 |
| 293 NA10863 | [2515685 chr9  | 9  | 310045    | 312573    | 2529    | 61   | -0.301084 | 0.016233 | 309952    | 310139    | 312407    | 3127409   |
| 294 NA10863 | [2515685 chr9  | 9  | 7533038   | 7534176   | 1139    | 2    | 0.722554  | 0.119966 | 7532679   | 7533398   | 7533963   | 7534390   |
| 295 NA10863 | [2515685 chr9  | 9  | 24492514  | 24508680  | 16167   | 15   | -0.765974 | 0.040629 | 24492034  | 24492994  | 24508226  | 24509131  |
| 296 NA10863 | [2515685 chr9  | 9  | 39811790  | 39822887  | 11098   | 18   | -0.308226 | 0.032685 | 39810439  | 39813141  | 39822472  | 39823307  |
| 297 NA10863 | [2515685 chr9  | 9  | 40609092  | 40609741  | 650     | 2    | -0.427862 | 0.083608 | 40608659  | 40609526  | 40609527  | 40609951  |
| 298 NA10863 | [2515685 chr9  | 9  | 41614024  | 41614674  | 651     | 2    | -0.427865 | 0.083609 | 41613590  | 41614458  | 41614459  | 41614888  |
| 299 NA10863 | [2515685 chr9  | 9  | 41642009  | 41653902  | 11894   | 17   | -0.305537 | 0.033336 | 41641595  | 41642423  | 41651748  | 41656057  |
| 300 NA10863 | [2515685 chr9  | 9  | 41895986  | 41899861  | 3876    | 3    | -0.378574 | 0.069699 | 41895482  | 41896490  | 41897501  | 41903671  |
| 301 NA10863 | [2515685 chr9  | 9  | 42070573  | 42079321  | 8749    | 14   | -0.269575 | 0.033033 | 42069073  | 42072074  | 42078891  | 42079757  |
| 302 NA10863 | [2515685 chr9  | 9  | 42639862  | 42646038  | 6177    | 13   | -0.379871 | 0.0348   | 42639537  | 42640187  | 42645769  | 42646307  |
| 303 NA10863 | [2515685 chr9  | 9  | 42752844  | 42763929  | 11086   | 18   | -0.375565 | 0.028631 | 42751520  | 42754168  | 42763499  | 42764351  |
| 304 NA10863 | [2515685 chr9  | 9  | 42873520  | 42884605  | 11086   | 18   | -0.375569 | 0.028631 | 42872196  | 42874844  | 42884175  | 42885031  |
| 305 NA10863 | [2515685 chr9  | 9  | 43065211  | 43066832  | 1622    | 2    | -0.802969 | 0.097715 | 43064261  | 43066162  | 43066646  | 43067011  |
| 306 NA10863 | [2515685 chr9  | 9  | 43099507  | 43215931  | 116425  | 244  | -0.257156 | 0.00894  | 43099240  | 43099774  | 43213571  | 43263911  |
| 307 NA10863 | [2515685 chr9  | 9  | 43714906  | 43721070  | 6165    | 12   | -0.392403 | 0.035725 | 43714582  | 43715231  | 43720801  | 43721331  |
| 308 NA10863 | [2515685 chr9  | 9  | 44153357  | 44153558  | 202     | 2    | -0.572543 | 0.102594 | 44153348  | 44153366  | 44153395  | 44153727  |
| 309 NA10863 | [2515685 chr9  | 9  | 65309543  | 65309744  | 202     | 2    | -0.572544 | 0.102594 | 65309534  | 65309552  | 65309581  | 65309907  |
| 310 NA10863 | [2515685 chr9  | 9  | 66230851  | 66231052  | 202     | 2    | -0.572543 | 0.102594 | 66230842  | 66230860  | 66230889  | 66231211  |
| 311 NA10863 | [2515685 chr9  | 9  | 66420119  | 66431395  | 11277   | 20   | 0.268805  | 0.032208 | 66419790  | 66420448  | 66430969  | 66431827  |
| 312 NA10863 | [2515685 chr9  | 9  | 76785489  | 76787598  | 2110    | 2    | -0.969857 | 0.107637 | 76785038  | 76785941  | 76787269  | 76787927  |
| 313 NA10863 | [2515685 chr9  | 9  | 81553104  | 81555243  | 2140    | 2    | 0.487034  | 0.097091 | 81552817  | 81553392  | 81553888  | 81556599  |
| 314 NA10863 | [2515685 chr9  | 9  | 101795950 | 101804576 | 8627    | 7    | -0.973584 | 0.063766 | 101795517 | 101796383 | 101803113 | 10180603  |
| 315 NA10863 | [2515685 chr9  | 9  | 131289414 | 131293919 | 4506    | 2    | -0.953688 | 0.11709  | 131287281 | 131291547 | 131292523 | 131295317 |
| 316 NA10863 | [2515685 chr9  | 9  | 135438421 | 135444067 | 5647    | 2    | 2.123095  | 0.130505 | 135383632 | 135440781 | 135443016 | 135445117 |
| 317 NA10863 | [2515685 chr9  | 9  | 138188003 | 138189923 | 1921    | 45   | 0.481507  | 0.021484 | 138187808 | 138188198 | 138189840 | 138190007 |
| 318 NA10863 | [2515685 chr10 | 10 | 161582    | 164636    | 3055    | 6    | -0.814955 | 0.061199 | 161290    | 161875    | 164450    | 164823    |
| 319 NA10863 | [2515685 chr10 | 10 | 170571    | 172369    | 1799    | 2    | 0.530384  | 0.091922 | 170341    | 170801    | 171237    | 173501    |
| 320 NA10863 | [2515685 chr10 | 10 | 6693908   | 6703893   | 9986    | 8    | 0.692353  | 0.055657 | 6692231   | 6695585   | 6703779   | 6704008   |
| 321 NA10863 | [2515685 chr10 | 10 | 20036833  | 20038315  | 1483    | 2    | -0.77744  | 0.11394  | 20036464  | 20037202  | 20038007  | 20038627  |
| 322 NA10863 | [2515685 chr10 | 10 | 20888202  | 20900111  | 11910   | 9    | -0.803498 | 0.053841 | 20883329  | 20890946  | 20897367  | 20902917  |
| 323 NA10863 | [2515685 chr10 | 10 | 37486514  | 37529195  | 42682   | 65   | -0.380072 | 0.015819 | 37486043  | 37486985  | 37528890  | 37529501  |
| 324 NA10863 | [2515685 chr10 | 10 | 42564252  | 42565662  | 1411    | 4    | -0.564911 | 0.072759 | 42563949  | 42564556  | 42565423  | 42565907  |

|             |                |    |           |           |         |      |           |          |           |           |           |          |
|-------------|----------------|----|-----------|-----------|---------|------|-----------|----------|-----------|-----------|-----------|----------|
| 325 NA10863 | [2515685 chr10 | 10 | 45949018  | 45949554  | 537     | 2    | -0.833059 | 0.108906 | 45948746  | 45949291  | 45949345  | 4594976  |
| 326 NA10863 | [2515685 chr10 | 10 | 46098400  | 48939818  | 2841419 | 3971 | -0.250572 | 0.002121 | 46098202  | 46098599  | 48937901  | 48941731 |
| 327 NA10863 | [2515685 chr10 | 10 | 51116621  | 51132551  | 15931   | 22   | -0.33981  | 0.028901 | 51067634  | 51119365  | 51132382  | 5113272  |
| 328 NA10863 | [2515685 chr10 | 10 | 52136987  | 52143410  | 6424    | 9    | -0.266492 | 0.043396 | 52136355  | 52137619  | 52140666  | 5216594  |
| 329 NA10863 | [2515685 chr10 | 10 | 55112552  | 55116963  | 4412    | 3    | 0.51402   | 0.087882 | 55112120  | 55112985  | 55116041  | 5511788  |
| 330 NA10863 | [2515685 chr10 | 10 | 56117212  | 56139275  | 22064   | 20   | -0.908367 | 0.034473 | 56115764  | 56118661  | 56139931  | 5613961  |
| 331 NA10863 | [2515685 chr10 | 10 | 88866216  | 88966295  | 100080  | 111  | -0.331557 | 0.013114 | 88865617  | 88866816  | 88965910  | 8896668  |
| 332 NA10863 | [2515685 chr10 | 10 | 89138419  | 89179870  | 41452   | 70   | -0.272073 | 0.016755 | 89137950  | 89138889  | 89179587  | 8918015  |
| 333 NA10863 | [2515685 chr10 | 10 | 114102241 | 114106477 | 4237    | 5    | 1.024018  | 0.075611 | 114101694 | 114102788 | 114105867 | 11410708 |
| 334 NA10863 | [2515685 chr10 | 10 | 124341749 | 124366738 | 24990   | 30   | -0.488052 | 0.023293 | 124341238 | 124342261 | 124366300 | 12436717 |
| 335 NA10863 | [2515685 chr10 | 10 | 127564343 | 127582849 | 18507   | 17   | -0.269608 | 0.037218 | 127563306 | 127565381 | 127581533 | 12758416 |
| 336 NA10863 | [2515685 chr10 | 10 | 134168268 | 134170259 | 1992    | 18   | -0.347093 | 0.037342 | 134168012 | 134168524 | 134170097 | 13417042 |
| 337 NA10863 | [2515685 chr10 | 10 | 135179346 | 135183528 | 4183    | 23   | 0.286285  | 0.024655 | 135178919 | 135179774 | 135183320 | 13518373 |
| 338 NA10863 | [2515685 chr10 | 10 | 135271835 | 135280539 | 8705    | 10   | -0.250691 | 0.041894 | 135270835 | 135272835 | 135280121 | 13528095 |
| 339 NA10863 | [2515685 chr10 | 10 | 135365507 | 135367159 | 1653    | 2    | 0.710873  | 0.120866 | 135364999 | 135366016 | 135366656 | 13536766 |
| 340 NA10863 | [2515685 chr11 | 11 | 2840307   | 2842410   | 2104    | 3    | 0.991716  | 0.097175 | 2839959   | 2840656   | 2841856   | 284296   |
| 341 NA10863 | [2515685 chr11 | 11 | 3271902   | 3274139   | 2238    | 3    | -0.62009  | 0.083165 | 3271303   | 3272502   | 3273580   | 327469   |
| 342 NA10863 | [2515685 chr11 | 11 | 3628748   | 3632795   | 4048    | 6    | -0.329242 | 0.062225 | 3625722   | 3631775   | 3632594   | 363299   |
| 343 NA10863 | [2515685 chr11 | 11 | 5717038   | 5722026   | 4989    | 3    | 2.954425  | 0.147118 | 5716660   | 5717416   | 5718945   | 572548   |
| 344 NA10863 | [2515685 chr11 | 11 | 5741269   | 5765993   | 24725   | 33   | 1.538169  | 0.037016 | 5741059   | 5741480   | 5765632   | 576635   |
| 345 NA10863 | [2515685 chr11 | 11 | 10224779  | 10229788  | 5010    | 5    | 0.490293  | 0.076221 | 10219961  | 10227860  | 10227972  | 1023160  |
| 346 NA10863 | [2515685 chr11 | 11 | 11831868  | 11833089  | 1222    | 2    | 0.875932  | 0.117986 | 11831412  | 11832324  | 11832853  | 11833321 |
| 347 NA10863 | [2515685 chr11 | 11 | 18906905  | 18928671  | 21767   | 30   | 0.707439  | 0.027925 | 18906533  | 18907278  | 18928457  | 1892888  |
| 348 NA10863 | [2515685 chr11 | 11 | 40984611  | 40986324  | 1714    | 2    | 0.466717  | 0.09318  | 40984262  | 40984960  | 40985774  | 4098687  |
| 349 NA10863 | [2515685 chr11 | 11 | 48284073  | 48284771  | 699     | 2    | 0.939604  | 0.099922 | 48283862  | 48284285  | 48284572  | 4828497  |
| 350 NA10863 | [2515685 chr11 | 11 | 49665830  | 49715829  | 50000   | 36   | 0.490979  | 0.024695 | 49665251  | 49666410  | 49712748  | 4972198  |
| 351 NA10863 | [2515685 chr11 | 11 | 50233802  | 50235333  | 1532    | 3    | -0.363125 | 0.070852 | 50233483  | 50234121  | 50234922  | 5023574  |
| 352 NA10863 | [2515685 chr11 | 11 | 55124643  | 55212649  | 88007   | 98   | -0.733461 | 0.016078 | 55124460  | 55124827  | 55209568  | 5521575  |
| 353 NA10863 | [2515685 chr11 | 11 | 73812690  | 73818580  | 5891    | 4    | -0.402018 | 0.076535 | 73812400  | 73812981  | 73818213  | 7381894  |
| 354 NA10863 | [2515685 chr11 | 11 | 81199065  | 81203719  | 4655    | 3    | 0.529095  | 0.092977 | 81194614  | 81202146  | 81203484  | 8120395  |
| 355 NA10863 | [2515685 chr11 | 11 | 88266938  | 88303948  | 37011   | 40   | 0.309333  | 0.023599 | 88266424  | 88267453  | 88303762  | 8830413  |
| 356 NA10863 | [2515685 chr11 | 11 | 89184898  | 89188706  | 3809    | 4    | 0.433855  | 0.077114 | 89184243  | 89185554  | 89188235  | 8918917  |
| 357 NA10863 | [2515685 chr11 | 11 | 89260124  | 89266247  | 6124    | 10   | -0.54524  | 0.047766 | 89259811  | 89260437  | 89265993  | 8926650  |
| 358 NA10863 | [2515685 chr11 | 11 | 89323920  | 89330042  | 6123    | 12   | -0.555848 | 0.043268 | 89323666  | 89324175  | 89329729  | 8933035  |
| 359 NA10863 | [2515685 chr11 | 11 | 134107699 | 134112290 | 4592    | 5    | 0.669758  | 0.07065  | 134106591 | 134108808 | 134111845 | 13411273 |
| 360 NA10863 | [2515685 chr12 | 12 | 398598    | 408498    | 9901    | 15   | 0.272536  | 0.03259  | 398035    | 399161    | 408146    | 40885    |
| 361 NA10863 | [2515685 chr12 | 12 | 736840    | 744802    | 7963    | 9    | 0.890111  | 0.050874 | 736616    | 737064    | 744211    | 74539    |
| 362 NA10863 | [2515685 chr12 | 12 | 2112534   | 2127044   | 14511   | 15   | 0.673108  | 0.038722 | 2109107   | 2115961   | 2126809   | 212727   |
| 363 NA10863 | [2515685 chr12 | 12 | 6113530   | 6117052   | 3523    | 3    | 0.527318  | 0.094715 | 6111640   | 6115421   | 6116289   | 611781   |
| 364 NA10863 | [2515685 chr12 | 12 | 11070849  | 11144680  | 73832   | 90   | -0.325867 | 0.015621 | 11069857  | 11071841  | 11144324  | 1114503  |
| 365 NA10863 | [2515685 chr12 | 12 | 11398049  | 11463223  | 65175   | 66   | -0.258931 | 0.018179 | 11397507  | 11398591  | 11459990  | 1146645  |
| 366 NA10863 | [2515685 chr12 | 12 | 31869225  | 31874787  | 5563    | 2    | 0.870694  | 0.101699 | 31864235  | 31872714  | 31872796  | 3187677  |
| 367 NA10863 | [2515685 chr12 | 12 | 32222034  | 32227627  | 5594    | 9    | -0.885386 | 0.055405 | 32221610  | 32222458  | 32226830  | 3222842  |
| 368 NA10863 | [2515685 chr12 | 12 | 36209455  | 36221304  | 11850   | 12   | -0.264055 | 0.039411 | 36200442  | 36212944  | 36220304  | 3622230  |
| 369 NA10863 | [2515685 chr12 | 12 | 36807060  | 36811199  | 4140    | 2    | -0.502491 | 0.095976 | 36801167  | 36810549  | 36811084  | 3681131  |
| 370 NA10863 | [2515685 chr12 | 12 | 69156923  | 69167885  | 10963   | 11   | 0.769016  | 0.048062 | 69138649  | 69160412  | 69164396  | 6921501  |
| 371 NA10863 | [2515685 chr12 | 12 | 70475445  | 70476812  | 1368    | 2    | -0.674271 | 0.111952 | 70475180  | 70475711  | 70476524  | 7047710  |
| 372 NA10863 | [2515685 chr12 | 12 | 131046250 | 131046750 | 501     | 2    | 1.383231  | 0.127633 | 131046129 | 131046371 | 131046551 | 13104694 |
| 373 NA10863 | [2515685 chr13 | 13 | 18344295  | 18346231  | 1937    | 3    | 0.496125  | 0.090767 | 18343911  | 18344680  | 18346018  | 1834644  |
| 374 NA10863 | [2515685 chr13 | 13 | 20791907  | 20798885  | 6979    | 8    | -0.276967 | 0.0526   | 20791561  | 20792253  | 20798220  | 2079955  |
| 375 NA10863 | [2515685 chr13 | 13 | 33029574  | 33042392  | 12819   | 8    | 0.877135  | 0.059892 | 33000262  | 33034253  | 33041860  | 3304292  |
| 376 NA10863 | [2515685 chr13 | 13 | 69633905  | 69673289  | 39385   | 42   | 0.831184  | 0.024184 | 69633412  | 69634399  | 69672985  | 6967359  |
| 377 NA10863 | [2515685 chr13 | 13 | 109215660 | 109217089 | 1430    | 5    | -0.5587   | 0.056572 | 109215230 | 109216090 | 109216885 | 10921729 |
| 378 NA10863 | [2515685 chr13 | 13 | 110502383 | 110503129 | 747     | 3    | -0.724934 | 0.095374 | 110502225 | 110502541 | 110502890 | 11050336 |
| 379 NA10863 | [2515685 chr13 | 13 | 113080947 | 113086817 | 5871    | 2    | 0.976456  | 0.128372 | 113080404 | 113081491 | 113082138 | 11309434 |

|             |                |    |           |           |        |     |           |          |           |           |           |           |
|-------------|----------------|----|-----------|-----------|--------|-----|-----------|----------|-----------|-----------|-----------|-----------|
| 380 NA10863 | [2515685 chr14 | 14 | 18429036  | 18841309  | 412274 | 668 | -0.328806 | 0.003728 | 18427834  | 18430239  | 18841144  | 1884147-  |
| 381 NA10863 | [2515685 chr14 | 14 | 18849836  | 19265232  | 415397 | 722 | -0.328806 | 0.003728 | 18849501  | 18850172  | 19261661  | 1926880-  |
| 382 NA10863 | [2515685 chr14 | 14 | 19619359  | 19625484  | 6126   | 3   | 3.737128  | 0.205704 | 19612261  | 19624114  | 19625018  | 1962595-  |
| 383 NA10863 | [2515685 chr14 | 14 | 34065529  | 34072036  | 6508   | 6   | -0.961611 | 0.065589 | 34063717  | 34067341  | 34071486  | 3407258-  |
| 384 NA10863 | [2515685 chr14 | 14 | 42059344  | 42062997  | 3654   | 2   | 0.784513  | 0.115482 | 42056485  | 42062203  | 42062601  | 4206339-  |
| 385 NA10863 | [2515685 chr14 | 14 | 73051447  | 73053781  | 2335   | 3   | -0.346942 | 0.069065 | 73051180  | 73051714  | 73052927  | 7305463-  |
| 386 NA10863 | [2515685 chr14 | 14 | 73070288  | 73084642  | 14355  | 16  | -0.467298 | 0.04216  | 73068747  | 73071829  | 73083193  | 7308609-  |
| 387 NA10863 | [2515685 chr14 | 14 | 73095972  | 73114867  | 18896  | 14  | 0.281951  | 0.038705 | 73095334  | 73096611  | 73114648  | 7311508-  |
| 388 NA10863 | [2515685 chr14 | 14 | 104766812 | 104778505 | 11694  | 145 | 0.411164  | 0.011182 | 104766457 | 104767167 | 104778286 | 10477872- |
| 389 NA10863 | [2515685 chr15 | 15 | 18530036  | 18536491  | 6456   | 7   | 0.350303  | 0.048963 | 18529050  | 18531023  | 18535776  | 1853720-  |
| 390 NA10863 | [2515685 chr15 | 15 | 18840785  | 18849369  | 8585   | 13  | -0.293999 | 0.040776 | 18839417  | 18842153  | 18848726  | 1885001-  |
| 391 NA10863 | [2515685 chr15 | 15 | 19092673  | 19293921  | 201249 | 259 | 0.280809  | 0.006673 | 19092490  | 19092856  | 19293604  | 1929423-  |
| 392 NA10863 | [2515685 chr15 | 15 | 19300507  | 19468608  | 168102 | 201 | 0.280809  | 0.006673 | 19298205  | 19305017  | 19468389  | 1946882-  |
| 393 NA10863 | [2515685 chr15 | 15 | 19541235  | 19548332  | 7098   | 10  | 0.351056  | 0.042639 | 19540890  | 19541581  | 19547623  | 1954904-  |
| 394 NA10863 | [2515685 chr15 | 15 | 19761205  | 19785829  | 24625  | 23  | 0.388862  | 0.027804 | 19663241  | 19763507  | 19785566  | 1978609-  |
| 395 NA10863 | [2515685 chr15 | 15 | 19849877  | 19914793  | 64917  | 55  | 0.28455   | 0.020237 | 19849338  | 19850417  | 19914436  | 1991515-  |
| 396 NA10863 | [2515685 chr15 | 15 | 20234328  | 20244878  | 10551  | 16  | -0.346554 | 0.035151 | 20233781  | 20234875  | 20243860  | 2024589-  |
| 397 NA10863 | [2515685 chr15 | 15 | 21051502  | 21068071  | 16570  | 15  | 0.258874  | 0.035511 | 21051321  | 21051684  | 21065769  | 2111638-  |
| 398 NA10863 | [2515685 chr15 | 15 | 21606753  | 21614600  | 7848   | 7   | 0.911676  | 0.063313 | 21606459  | 21607047  | 21612298  | 2163669-  |
| 399 NA10863 | [2515685 chr15 | 15 | 23482566  | 23483671  | 1106   | 2   | 0.803199  | 0.084021 | 23482224  | 23482908  | 23483437  | 2348390-  |
| 400 NA10863 | [2515685 chr15 | 15 | 24986053  | 24992250  | 6198   | 7   | 0.852056  | 0.06122  | 24985426  | 24986680  | 24991680  | 2499282-  |
| 401 NA10863 | [2515685 chr15 | 15 | 26319973  | 26331811  | 11839  | 19  | -0.324179 | 0.033014 | 26319887  | 26320060  | 26331265  | 2633235-  |
| 402 NA10863 | [2515685 chr15 | 15 | 26875842  | 26877026  | 1185   | 2   | 0.692347  | 0.109022 | 26875299  | 26876385  | 26876824  | 2687722-  |
| 403 NA10863 | [2515685 chr15 | 15 | 32518204  | 32592621  | 74418  | 62  | 0.566608  | 0.0199   | 32517506  | 32518902  | 32592260  | 3259298-  |
| 404 NA10863 | [2515685 chr15 | 15 | 74671388  | 74682820  | 11433  | 9   | 0.889231  | 0.054138 | 74671122  | 74671654  | 74680518  | 7468951-  |
| 405 NA10863 | [2515685 chr15 | 15 | 75117585  | 75119946  | 2362   | 4   | -1.692836 | 0.104079 | 75117343  | 75117827  | 75119741  | 7512015-  |
| 406 NA10863 | [2515685 chr15 | 15 | 83581911  | 83582575  | 665    | 2   | -0.973458 | 0.086036 | 83581731  | 83582092  | 83582192  | 8358295-  |
| 407 NA10863 | [2515685 chr15 | 15 | 83685983  | 83688723  | 2741   | 2   | -0.599048 | 0.109837 | 83684729  | 83687238  | 83687705  | 8368974-  |
| 408 NA10863 | [2515685 chr15 | 15 | 98234084  | 98240716  | 6633   | 8   | 0.937119  | 0.058202 | 98233842  | 98234327  | 98239350  | 9824208-  |
| 409 NA10863 | [2515685 chr15 | 15 | 100109640 | 100122682 | 13043  | 98  | 0.895686  | 0.012324 | 100108905 | 100110376 | 100122315 | 10012305- |
| 410 NA10863 | [2515685 chr15 | 15 | 100266888 | 100309150 | 42263  | 16  | 0.557578  | 0.036417 | 100264210 | 100269190 | 100307499 | 10031080- |
| 411 NA10863 | [2515685 chr16 | 16 | 675377    | 680715    | 5339   | 8   | -0.277832 | 0.050355 | 674862    | 675892    | 680469    | 680962    |
| 412 NA10863 | [2515685 chr16 | 16 | 909422    | 910556    | 1135   | 2   | -0.480065 | 0.094899 | 909128    | 909716    | 910313    | 91080C    |
| 413 NA10863 | [2515685 chr16 | 16 | 2638196   | 2640225   | 2030   | 3   | 0.540162  | 0.095087 | 2637783   | 2638609   | 2639826   | 264062-   |
| 414 NA10863 | [2515685 chr16 | 16 | 5287117   | 5290631   | 3515   | 2   | 1.447713  | 0.137283 | 5286149   | 5288085   | 5288751   | 529327-   |
| 415 NA10863 | [2515685 chr16 | 16 | 16633469  | 16639120  | 5652   | 4   | 0.947489  | 0.075931 | 16632502  | 16634437  | 16638386  | 1663985-  |
| 416 NA10863 | [2515685 chr16 | 16 | 18199867  | 18200872  | 1006   | 2   | -0.621226 | 0.113289 | 18199806  | 18199928  | 18200065  | 1820168-  |
| 417 NA10863 | [2515685 chr16 | 16 | 28118672  | 28128818  | 10147  | 9   | 0.251753  | 0.049304 | 28118122  | 28119223  | 28128529  | 2812910-  |
| 418 NA10863 | [2515685 chr16 | 16 | 28196837  | 28205981  | 9145   | 10  | -0.302235 | 0.046947 | 28196598  | 28197077  | 28205620  | 2820634-  |
| 419 NA10863 | [2515685 chr16 | 16 | 28324617  | 28335549  | 10933  | 10  | 0.274747  | 0.046857 | 28324569  | 28324665  | 28334190  | 2833690-  |
| 420 NA10863 | [2515685 chr16 | 16 | 28617225  | 28628077  | 10853  | 11  | 0.279991  | 0.045101 | 28615757  | 28618694  | 28627777  | 2862837-  |
| 421 NA10863 | [2515685 chr16 | 16 | 32106365  | 32106660  | 296    | 2   | 0.774752  | 0.109296 | 32106136  | 32106595  | 32106634  | 3210668-  |
| 422 NA10863 | [2515685 chr16 | 16 | 32150890  | 32159898  | 9009   | 30  | -0.313477 | 0.024337 | 32150057  | 32151724  | 32159453  | 3216034-  |
| 423 NA10863 | [2515685 chr16 | 16 | 32159898  | 32160377  | 480    | 2   | -1.829226 | 0.102272 | 32159453  | 32160343  | 32160346  | 3216040-  |
| 424 NA10863 | [2515685 chr16 | 16 | 32160377  | 32186190  | 25814  | 69  | -0.308405 | 0.015904 | 32160346  | 32160408  | 32186029  | 3218635-  |
| 425 NA10863 | [2515685 chr16 | 16 | 32295845  | 32305921  | 10077  | 14  | -0.359888 | 0.038307 | 32283039  | 32297725  | 32305758  | 3230608-  |
| 426 NA10863 | [2515685 chr16 | 16 | 32580873  | 32606692  | 25820  | 73  | -0.316446 | 0.01538  | 32580695  | 32581051  | 32606661  | 3260672-  |
| 427 NA10863 | [2515685 chr16 | 16 | 32606692  | 32607163  | 472    | 2   | -1.829236 | 0.102272 | 32606661  | 32606724  | 32606727  | 3260759-  |
| 428 NA10863 | [2515685 chr16 | 16 | 32607163  | 32616183  | 9021   | 32  | -0.319003 | 0.023861 | 32606727  | 32607599  | 32615350  | 3261701-  |
| 429 NA10863 | [2515685 chr16 | 16 | 32660409  | 32660703  | 295    | 2   | 0.774748  | 0.109296 | 32660384  | 32660435  | 32660474  | 3266093-  |
| 430 NA10863 | [2515685 chr16 | 16 | 33047346  | 33047640  | 295    | 2   | 0.774752  | 0.109296 | 33047117  | 33047575  | 33047614  | 3304766-  |
| 431 NA10863 | [2515685 chr16 | 16 | 33091854  | 33183694  | 91841  | 230 | -0.320638 | 0.008664 | 33091021  | 33092688  | 33183517  | 3318387-  |
| 432 NA10863 | [2515685 chr16 | 16 | 34321826  | 34609073  | 287248 | 323 | -0.47688  | 0.008277 | 34317185  | 34323706  | 34607193  | 3461732-  |
| 433 NA10863 | [2515685 chr16 | 16 | 54352578  | 54380740  | 28163  | 31  | -0.444741 | 0.026356 | 54351821  | 54353335  | 54380388  | 5438109-  |
| 434 NA10863 | [2515685 chr16 | 16 | 57204541  | 57207585  | 3045   | 3   | 3.327197  | 0.157791 | 57204170  | 57204913  | 57206938  | 5720823-  |

|             |                |    |          |          |         |     |           |          |          |          |          |          |
|-------------|----------------|----|----------|----------|---------|-----|-----------|----------|----------|----------|----------|----------|
| 435 NA10863 | [2515685 chr16 | 16 | 83994929 | 84004171 | 9243    | 81  | 0.788767  | 0.015188 | 83994558 | 83995300 | 84003767 | 84004571 |
| 436 NA10863 | [2515685 chr16 | 16 | 84562720 | 84565235 | 2516    | 11  | 0.526867  | 0.047219 | 84561685 | 84563756 | 84565142 | 8456532! |
| 437 NA10863 | [2515685 chr16 | 16 | 86669849 | 86672366 | 2518    | 2   | -0.732405 | 0.092531 | 86669288 | 86670411 | 86671217 | 8667351! |
| 438 NA10863 | [2515685 chr16 | 16 | 88181036 | 88182713 | 1678    | 2   | 0.498634  | 0.0987   | 88180612 | 88181461 | 88182173 | 8818325! |
| 439 NA10863 | [2515685 chr16 | 16 | 88423913 | 88428974 | 5062    | 6   | -0.385673 | 0.058707 | 88423258 | 88424569 | 88428558 | 8842939! |
| 440 NA10863 | [2515685 chr16 | 16 | 88710464 | 88712266 | 1803    | 9   | -0.273688 | 0.05421  | 88710456 | 88710473 | 88712200 | 8871233: |
| 441 NA10863 | [2515685 chr17 | 17 | 911980   | 915554   | 3575    | 4   | -0.42283  | 0.074383 | 911452   | 912508   | 915413   | 91569!   |
| 442 NA10863 | [2515685 chr17 | 17 | 966845   | 969578   | 2734    | 21  | 0.381332  | 0.03501  | 966537   | 967154   | 969378   | 96977!   |
| 443 NA10863 | [2515685 chr17 | 17 | 16657833 | 16665630 | 7798    | 12  | -0.3424   | 0.044111 | 16657486 | 16658180 | 16665353 | 1666590! |
| 444 NA10863 | [2515685 chr17 | 17 | 18299050 | 18307779 | 8730    | 15  | 0.429974  | 0.037989 | 18298294 | 18299807 | 18307759 | 1830780! |
| 445 NA10863 | [2515685 chr17 | 17 | 18331739 | 18332345 | 607     | 2   | -1.087941 | 0.106857 | 18331509 | 18331970 | 18331978 | 1833271: |
| 446 NA10863 | [2515685 chr17 | 17 | 20299935 | 20300531 | 597     | 2   | -1.087941 | 0.106857 | 20299568 | 20300303 | 20300311 | 2030075: |
| 447 NA10863 | [2515685 chr17 | 17 | 20325192 | 20325864 | 673     | 2   | 0.838285  | 0.088189 | 20324968 | 20325416 | 20325582 | 2032614! |
| 448 NA10863 | [2515685 chr17 | 17 | 20394086 | 20394524 | 439     | 2   | -0.602352 | 0.114564 | 20394056 | 20394116 | 20394472 | 2039457! |
| 449 NA10863 | [2515685 chr17 | 17 | 20571353 | 20578410 | 7058    | 6   | -0.454319 | 0.062087 | 20571124 | 20571582 | 20577452 | 2057936! |
| 450 NA10863 | [2515685 chr17 | 17 | 20644041 | 20648732 | 4692    | 4   | -0.551938 | 0.07391  | 20643647 | 20644435 | 20647744 | 2064972! |
| 451 NA10863 | [2515685 chr17 | 17 | 21386421 | 21389813 | 3393    | 4   | -0.4642   | 0.077632 | 21386258 | 21386584 | 21389498 | 2139012: |
| 452 NA10863 | [2515685 chr17 | 17 | 21942843 | 21954909 | 12067   | 20  | -0.405958 | 0.032109 | 21942618 | 21943068 | 21954628 | 2195519: |
| 453 NA10863 | [2515685 chr17 | 17 | 31506465 | 31830917 | 324453  | 442 | -0.434043 | 0.006192 | 31506035 | 31506896 | 31830731 | 3183110: |
| 454 NA10863 | [2515685 chr17 | 17 | 31865078 | 31882505 | 17428   | 53  | -0.480494 | 0.017874 | 31864350 | 31865807 | 31882171 | 3188284! |
| 455 NA10863 | [2515685 chr17 | 17 | 32829500 | 32833231 | 3732    | 5   | 0.745352  | 0.074779 | 32828825 | 32830175 | 32832670 | 3283379: |
| 456 NA10863 | [2515685 chr17 | 17 | 32852219 | 32855919 | 3701    | 2   | -0.557734 | 0.109738 | 32851118 | 32853321 | 32854337 | 3285750: |
| 457 NA10863 | [2515685 chr17 | 17 | 33358586 | 33553833 | 195248  | 241 | -0.452588 | 0.006727 | 33358400 | 33358772 | 33553386 | 3355428! |
| 458 NA10863 | [2515685 chr17 | 17 | 33585313 | 33659558 | 74246   | 131 | -0.452588 | 0.006727 | 33584586 | 33586040 | 33658997 | 3366011! |
| 459 NA10863 | [2515685 chr17 | 17 | 36675530 | 36685343 | 9814    | 10  | -2.264987 | 0.072155 | 36675011 | 36676049 | 36684647 | 3668604! |
| 460 NA10863 | [2515685 chr17 | 17 | 36785682 | 36793113 | 7432    | 8   | 0.445804  | 0.056712 | 36785202 | 36786162 | 36792578 | 3679364! |
| 461 NA10863 | [2515685 chr17 | 17 | 40943910 | 40964418 | 20509   | 23  | 0.283013  | 0.027846 | 40943511 | 40944309 | 40964370 | 4096446: |
| 462 NA10863 | [2515685 chr17 | 17 | 41035524 | 41036525 | 1002    | 2   | 1.086791  | 0.103665 | 41035120 | 41035928 | 41035967 | 4103708: |
| 463 NA10863 | [2515685 chr17 | 17 | 41521287 | 41676708 | 155422  | 155 | 0.43963   | 0.010414 | 41521002 | 41521572 | 41676309 | 4167710: |
| 464 NA10863 | [2515685 chr17 | 17 | 41694440 | 41724965 | 30526   | 29  | 0.43963   | 0.010414 | 41693144 | 41695737 | 41724205 | 4172572! |
| 465 NA10863 | [2515685 chr17 | 17 | 41779931 | 41787296 | 7366    | 4   | 0.51563   | 0.064687 | 41779457 | 41780406 | 41786164 | 4178842! |
| 466 NA10863 | [2515685 chr17 | 17 | 41959098 | 41986331 | 27234   | 39  | 0.250679  | 0.021366 | 41958869 | 41959327 | 41986039 | 4198662: |
| 467 NA10863 | [2515685 chr17 | 17 | 41997426 | 42004139 | 6714    | 3   | 0.534638  | 0.070387 | 41996952 | 41997901 | 42002352 | 4200592: |
| 468 NA10863 | [2515685 chr17 | 17 | 42970703 | 43026670 | 55968   | 86  | -0.417191 | 0.016059 | 42970185 | 42971221 | 42925568 | 4302777: |
| 469 NA10863 | [2515685 chr17 | 17 | 55368842 | 55373984 | 5143    | 7   | -0.563097 | 0.058923 | 55368278 | 55369406 | 55373396 | 5537457: |
| 470 NA10863 | [2515685 chr17 | 17 | 55434888 | 55454279 | 19392   | 36  | -0.440222 | 0.022814 | 55434445 | 55435332 | 55454017 | 5545454: |
| 471 NA10863 | [2515685 chr17 | 17 | 55806253 | 55811195 | 4943    | 2   | -0.649634 | 0.115312 | 55687363 | 55808452 | 55808996 | 5582897! |
| 472 NA10863 | [2515685 chr17 | 17 | 57652724 | 57667804 | 15081   | 18  | -0.386671 | 0.014706 | 57652052 | 57653396 | 57667259 | 5766834! |
| 473 NA10863 | [2515685 chr17 | 17 | 57681793 | 57709501 | 27709   | 58  | -0.386671 | 0.014706 | 57680114 | 57683473 | 57709158 | 5770984: |
| 474 NA10863 | [2515685 chr17 | 17 | 76913515 | 76917009 | 3495    | 2   | -0.60863  | 0.091286 | 76912973 | 76914058 | 76916332 | 7691768! |
| 475 NA10863 | [2515685 chr18 | 18 | 14172514 | 14180603 | 8090    | 13  | 0.438064  | 0.039645 | 14172152 | 14172877 | 14179955 | 1418125: |
| 476 NA10863 | [2515685 chr18 | 18 | 28142218 | 28143399 | 1182    | 2   | 0.762892  | 0.121926 | 28141854 | 28142583 | 28143055 | 2814374: |
| 477 NA10863 | [2515685 chr18 | 18 | 74231104 | 74234275 | 3172    | 30  | 0.593775  | 0.021929 | 74230952 | 74231256 | 74234139 | 7423441: |
| 478 NA10863 | [2515685 chr18 | 18 | 74373005 | 74376367 | 3363    | 7   | 0.611874  | 0.046191 | 74372064 | 74373947 | 74375833 | 7437690: |
| 479 NA10863 | [2515685 chr18 | 18 | 74392800 | 74398225 | 5426    | 4   | 0.583079  | 0.076042 | 74390826 | 74394774 | 74397790 | 7439866! |
| 480 NA10863 | [2515685 chr19 | 19 | 32148    | 75789    | 43642   | 20  | 0.56018   | 0.031963 | 30498    | 33798    | 73262    | 79306    |
| 481 NA10863 | [2515685 chr19 | 19 | 310414   | 312953   | 2540    | 14  | -0.611413 | 0.038156 | 309687   | 311142   | 312913   | 31299!   |
| 482 NA10863 | [2515685 chr19 | 19 | 331568   | 333129   | 1562    | 2   | 0.797186  | 0.101205 | 331314   | 331822   | 332310   | 33394!   |
| 483 NA10863 | [2515685 chr19 | 19 | 8708780  | 8763535  | 54756   | 94  | 0.399322  | 0.012815 | 8708296  | 8709264  | 8763160  | 876391!  |
| 484 NA10863 | [2515685 chr19 | 19 | 23007904 | 23013841 | 5938    | 6   | 0.827644  | 0.068545 | 22990964 | 23010431 | 23013525 | 2301415: |
| 485 NA10863 | [2515685 chr19 | 19 | 23108259 | 23109446 | 1188    | 2   | 1.129821  | 0.117838 | 23107903 | 23108615 | 23108879 | 2311001: |
| 486 NA10863 | [2515685 chr19 | 19 | 23257205 | 23258538 | 1334    | 2   | -0.86682  | 0.12175  | 23256882 | 23257529 | 23258213 | 2325886: |
| 487 NA10863 | [2515685 chr19 | 19 | 23597182 | 23600235 | 3054    | 5   | -2.679759 | 0.110243 | 23596541 | 23597823 | 23599600 | 2360087! |
| 488 NA10863 | [2515685 chr19 | 19 | 24170086 | 32932621 | 8762536 | 6   | -0.316894 | 0.058704 | 24169950 | 24170222 | 32930094 | 3293796: |
| 489 NA10863 | [2515685 chr19 | 19 | 39419837 | 39421349 | 1513    | 3   | 0.542101  | 0.095254 | 39419616 | 39420059 | 39421018 | 3942168: |

|             |                |    |          |          |        |     |           |          |          |          |          |          |
|-------------|----------------|----|----------|----------|--------|-----|-----------|----------|----------|----------|----------|----------|
| 490 NA10863 | [2515685 chr19 | 19 | 40352813 | 40357918 | 5106   | 5   | -0.618764 | 0.069124 | 40352601 | 40353026 | 40356667 | 4035916: |
| 491 NA10863 | [2515685 chr19 | 19 | 40540866 | 40554347 | 13482  | 15  | -0.794896 | 0.040538 | 40540646 | 40541086 | 40554020 | 4055467: |
| 492 NA10863 | [2515685 chr19 | 19 | 43974792 | 43977294 | 2503   | 2   | -0.635611 | 0.096956 | 43974369 | 43975216 | 43975620 | 4397896: |
| 493 NA10863 | [2515685 chr19 | 19 | 53100142 | 53151974 | 51833  | 98  | -0.325143 | 0.012411 | 53098980 | 53101305 | 53151638 | 5315231: |
| 494 NA10863 | [2515685 chr19 | 19 | 55285877 | 55336157 | 50281  | 104 | -0.313597 | 0.011975 | 55285730 | 55286025 | 55335244 | 5533707: |
| 495 NA10863 | [2515685 chr19 | 19 | 58209430 | 58245460 | 36031  | 28  | -0.330116 | 0.027316 | 58208997 | 58209863 | 58245024 | 5824589: |
| 496 NA10863 | [2515685 chr19 | 19 | 60044873 | 60049893 | 5021   | 6   | 0.287564  | 0.056354 | 60043738 | 60046008 | 60049164 | 6005062: |
| 497 NA10863 | [2515685 chr19 | 19 | 60166764 | 60173610 | 6847   | 3   | 0.372764  | 0.074542 | 60165407 | 60168121 | 60172279 | 6017494: |
| 498 NA10863 | [2515685 chr20 | 20 | 1494617  | 1511097  | 16481  | 18  | -0.301821 | 0.031552 | 1494422  | 1494812  | 1510534  | 151166:  |
| 499 NA10863 | [2515685 chr20 | 20 | 1511097  | 1532477  | 21381  | 26  | -1.885679 | 0.043816 | 1510534  | 1511660  | 1532182  | 153277:  |
| 500 NA10863 | [2515685 chr20 | 20 | 1533078  | 1544060  | 10983  | 16  | -0.342906 | 0.032908 | 1532773  | 1533384  | 1543588  | 154453:  |
| 501 NA10863 | [2515685 chr20 | 20 | 26136817 | 26137613 | 797    | 2   | 0.659284  | 0.112147 | 26136626 | 26137008 | 26137444 | 2613778: |
| 502 NA10863 | [2515685 chr20 | 20 | 61708834 | 61711805 | 2972   | 22  | -0.473294 | 0.03136  | 61708573 | 61709096 | 61711616 | 6171199: |
| 503 NA10863 | [2515685 chr20 | 20 | 62066380 | 62068214 | 1835   | 8   | 0.892399  | 0.053807 | 62066146 | 62066615 | 62067671 | 6206875: |
| 504 NA10863 | [2515685 chr20 | 20 | 62414561 | 62429848 | 15288  | 13  | -0.265365 | 0.041615 | 62406565 | 62417970 | 62429329 | 6243036: |
| 505 NA10863 | [2515685 chr21 | 21 | 14265788 | 14270346 | 4559   | 3   | 0.453502  | 0.07393  | 14264213 | 14267363 | 14269094 | 1427159: |
| 506 NA10863 | [2515685 chr22 | 22 | 14462901 | 14842314 | 379414 | 714 | -0.330699 | 0.005202 | 14462882 | 14462920 | 14841696 | 1484293: |
| 507 NA10863 | [2515685 chr22 | 22 | 15272638 | 15359104 | 86467  | 82  | -0.253366 | 0.015698 | 15270179 | 15275097 | 15358948 | 1535926: |
| 508 NA10863 | [2515685 chr22 | 22 | 17158001 | 17205708 | 47708  | 75  | 0.362882  | 0.016103 | 17157765 | 17158237 | 17205352 | 1720606: |
| 509 NA10863 | [2515685 chr22 | 22 | 17221797 | 17224330 | 2534   | 5   | 0.499684  | 0.063312 | 17221464 | 17222130 | 17224241 | 1722442: |
| 510 NA10863 | [2515685 chr22 | 22 | 17385504 | 17394963 | 9460   | 17  | -0.439416 | 0.035496 | 17385031 | 17385977 | 17394595 | 1739533: |
| 511 NA10863 | [2515685 chr22 | 22 | 18744519 | 18863336 | 118818 | 145 | -0.525672 | 0.012152 | 18744262 | 18746777 | 18863099 | 1886357: |
| 512 NA10863 | [2515685 chr22 | 22 | 19380073 | 19419484 | 39412  | 12  | -0.550781 | 0.043984 | 19377752 | 19382395 | 19416806 | 1944992: |
| 513 NA10863 | [2515685 chr22 | 22 | 19791149 | 19793611 | 2463   | 6   | 0.473344  | 0.058518 | 19791060 | 19791239 | 19793348 | 1979387: |
| 514 NA10863 | [2515685 chr22 | 22 | 19811736 | 19821124 | 9389   | 16  | 0.409448  | 0.036454 | 19811477 | 19811995 | 19820762 | 1982148: |
| 515 NA10863 | [2515685 chr22 | 22 | 19823261 | 19825767 | 2507   | 5   | 0.485732  | 0.061478 | 19823019 | 19823503 | 19825458 | 1982607: |
| 516 NA10863 | [2515685 chr22 | 22 | 19909122 | 19956787 | 47666  | 68  | 0.343881  | 0.016789 | 19908886 | 19909358 | 19956235 | 1995734: |
| 517 NA10863 | [2515685 chr22 | 22 | 19973569 | 19977049 | 3481   | 6   | 0.473344  | 0.058518 | 19972287 | 19974851 | 19976960 | 1997713: |
| 518 NA10863 | [2515685 chr22 | 22 | 20035209 | 20121795 | 86587  | 138 | -0.475244 | 0.008407 | 20034972 | 20035446 | 20121548 | 2012204: |
| 519 NA10863 | [2515685 chr22 | 22 | 20137248 | 20243639 | 106392 | 148 | -0.475244 | 0.008407 | 20136561 | 20137935 | 20240961 | 2035329: |
| 520 NA10863 | [2515685 chr22 | 22 | 21981918 | 21996223 | 14306  | 7   | 0.294169  | 0.053794 | 21980511 | 21983326 | 21993545 | 2208139: |
| 521 NA10863 | [2515685 chr22 | 22 | 22611178 | 22617550 | 6373   | 8   | -0.441886 | 0.015434 | 22609725 | 22612631 | 22617295 | 2261780: |
| 522 NA10863 | [2515685 chr22 | 22 | 22622691 | 22666058 | 43368  | 81  | -0.441886 | 0.015434 | 22621975 | 22623407 | 22665951 | 2266616: |
| 523 NA10863 | [2515685 chr22 | 22 | 22672624 | 22691501 | 18878  | 17  | 0.818292  | 0.025152 | 22672391 | 22672858 | 22691088 | 2269191: |
| 524 NA10863 | [2515685 chr22 | 22 | 22695407 | 22720154 | 24748  | 27  | 0.818292  | 0.025152 | 22695112 | 22695703 | 22719882 | 2272042: |
| 525 NA10863 | [2515685 chr22 | 22 | 22985370 | 22986040 | 671    | 3   | 0.47296   | 0.084291 | 22985041 | 22985699 | 22985733 | 2298634: |
| 526 NA10863 | [2515685 chr22 | 22 | 22995064 | 22999917 | 4854   | 10  | 0.299559  | 0.049003 | 22994927 | 22995201 | 22999409 | 2300042: |
| 527 NA10863 | [2515685 chr22 | 22 | 33619409 | 33622591 | 3183   | 4   | 0.880995  | 0.075598 | 33618939 | 33619879 | 33622541 | 3362264: |
| 528 NA10863 | [2515685 chr22 | 22 | 37617530 | 37624009 | 6480   | 8   | -0.817602 | 0.057048 | 37616333 | 37618728 | 37621331 | 3762705: |
| 529 NA10863 | [2515685 chr22 | 22 | 41241192 | 41243242 | 2051   | 2   | 0.579079  | 0.094479 | 41240451 | 41241934 | 41242753 | 4124373: |
| 530 NA10863 | [2515685 chr22 | 22 | 41266884 | 41274269 | 7386   | 4   | 0.45658   | 0.066558 | 41259972 | 41269562 | 41274060 | 4127447: |
| 1 NA07029   | [2515685 chr1  | 1  | 29401    | 116508   | 87108  | 73  | 0.374008  | 0.01687  | 27752    | 31050    | 115824   | 11719:   |
| 2 NA07029   | [2515685 chr1  | 1  | 601046   | 612159   | 11114  | 7   | -0.913858 | 0.056215 | 587801   | 604315   | 610122   | 61419:   |
| 3 NA07029   | [2515685 chr1  | 1  | 1853012  | 1854645  | 1634   | 2   | 0.693401  | 0.095964 | 1852616  | 1853409  | 1853816  | 185547:  |
| 4 NA07029   | [2515685 chr1  | 1  | 5304270  | 5305267  | 998    | 20  | 0.251431  | 0.032131 | 5303963  | 5304578  | 5305148  | 530538:  |
| 5 NA07029   | [2515685 chr1  | 1  | 10416438 | 10418311 | 1874   | 2   | -0.827295 | 0.101766 | 10415863 | 10417014 | 10417712 | 1041891: |
| 6 NA07029   | [2515685 chr1  | 1  | 10687939 | 10690748 | 2810   | 2   | 0.723256  | 0.126894 | 10687193 | 10688686 | 10690463 | 1069103: |
| 7 NA07029   | [2515685 chr1  | 1  | 12829124 | 12863838 | 34715  | 49  | 0.276171  | 0.020135 | 12828579 | 12829669 | 12860569 | 1286861: |
| 8 NA07029   | [2515685 chr1  | 1  | 12884329 | 12886858 | 2530   | 4   | 0.504465  | 0.060846 | 12884224 | 12884434 | 12886536 | 1288718: |
| 9 NA07029   | [2515685 chr1  | 1  | 13014231 | 13074923 | 60693  | 5   | -0.328348 | 0.060267 | 13013335 | 13015127 | 13074668 | 1307517: |
| 10 NA07029  | [2515685 chr1  | 1  | 13086012 | 13091899 | 5888   | 3   | -0.456834 | 0.073723 | 13085102 | 13086922 | 13091561 | 1309223: |
| 11 NA07029  | [2515685 chr1  | 1  | 13124784 | 13132010 | 7227   | 14  | 0.316351  | 0.03985  | 13124609 | 13124960 | 13131912 | 1313210: |
| 12 NA07029  | [2515685 chr1  | 1  | 13159940 | 13162706 | 2767   | 4   | 0.534676  | 0.05718  | 13159618 | 13160263 | 13162366 | 1316304: |
| 13 NA07029  | [2515685 chr1  | 1  | 13164423 | 13165991 | 1569   | 4   | 0.313701  | 0.059232 | 13164167 | 13164679 | 13165683 | 1316630: |
| 14 NA07029  | [2515685 chr1  | 1  | 13380737 | 13383503 | 2767   | 4   | 0.534676  | 0.05718  | 13380415 | 13381060 | 13383163 | 1338384: |



|    |         |               |   |           |           |        |     |           |          |           |           |           |           |
|----|---------|---------------|---|-----------|-----------|--------|-----|-----------|----------|-----------|-----------|-----------|-----------|
| 15 | NAO7029 | [2515685 chr1 | 1 | 13385220  | 13386788  | 1569   | 4   | 0.313701  | 0.059232 | 13384964  | 13385476  | 13386480  | 13387097  |
| 16 | NAO7029 | [2515685 chr1 | 1 | 16976745  | 17026185  | 49441  | 53  | -0.300105 | 0.020275 | 16976406  | 16977084  | 17025840  | 17026531  |
| 17 | NAO7029 | [2515685 chr1 | 1 | 72478372  | 72524180  | 45809  | 36  | -2.377844 | 0.041911 | 72478140  | 72478604  | 72523661  | 72524701  |
| 18 | NAO7029 | [2515685 chr1 | 1 | 89188689  | 89189555  | 867    | 2   | 3.328424  | 0.241264 | 89188470  | 89188908  | 89189310  | 89189801  |
| 19 | NAO7029 | [2515685 chr1 | 1 | 103848296 | 103866317 | 18022  | 27  | 0.301977  | 0.007975 | 103842566 | 103851565 | 103865345 | 103876291 |
| 20 | NAO7029 | [2515685 chr1 | 1 | 103873304 | 104013167 | 139864 | 229 | 0.301977  | 0.007975 | 103873021 | 103873587 | 104013157 | 104013171 |
| 21 | NAO7029 | [2515685 chr1 | 1 | 108514938 | 108527345 | 12408  | 25  | 0.348172  | 0.019664 | 108514864 | 108515012 | 108527142 | 108527541 |
| 22 | NAO7029 | [2515685 chr1 | 1 | 108528751 | 108565175 | 36425  | 29  | 0.348172  | 0.019664 | 108528671 | 108528832 | 108565023 | 108565532 |
| 23 | NAO7029 | [2515685 chr1 | 1 | 108638318 | 108674954 | 36637  | 29  | 0.352245  | 0.019564 | 108638254 | 108638383 | 108674873 | 108675031 |
| 24 | NAO7029 | [2515685 chr1 | 1 | 108676358 | 108688767 | 12410  | 25  | 0.352245  | 0.019564 | 108676155 | 108676562 | 108688693 | 108688884 |
| 25 | NAO7029 | [2515685 chr1 | 1 | 109936277 | 109937689 | 1413   | 2   | 0.798987  | 0.097203 | 109935275 | 109937279 | 109937663 | 109937711 |
| 26 | NAO7029 | [2515685 chr1 | 1 | 109940308 | 109941287 | 980    | 2   | 0.652484  | 0.108093 | 109940174 | 109940443 | 109940628 | 109941941 |
| 27 | NAO7029 | [2515685 chr1 | 1 | 109943169 | 109955935 | 12767  | 15  | 0.556264  | 0.039691 | 109942771 | 109943567 | 109955709 | 109956196 |
| 28 | NAO7029 | [2515685 chr1 | 1 | 112405902 | 112416691 | 10790  | 10  | 0.559686  | 0.050174 | 112405415 | 112406389 | 112416423 | 112416961 |
| 29 | NAO7029 | [2515685 chr1 | 1 | 120244720 | 120322352 | 77633  | 120 | 0.258549  | 0.011549 | 120243262 | 120246178 | 120322120 | 120322581 |
| 30 | NAO7029 | [2515685 chr1 | 1 | 120325718 | 120342752 | 17035  | 25  | 0.258549  | 0.011549 | 120325369 | 120326067 | 120342542 | 120342961 |
| 31 | NAO7029 | [2515685 chr1 | 1 | 141971552 | 141976719 | 5168   | 17  | 0.447299  | 0.030837 | 141971472 | 141971633 | 141976542 | 141976889 |
| 32 | NAO7029 | [2515685 chr1 | 1 | 142038688 | 142042325 | 3638   | 2   | -0.541705 | 0.096674 | 142038668 | 142038709 | 142042215 | 142042431 |
| 33 | NAO7029 | [2515685 chr1 | 1 | 142438646 | 142569435 | 130790 | 159 | 0.353653  | 0.011494 | 142438189 | 142439104 | 142568775 | 142570091 |
| 34 | NAO7029 | [2515685 chr1 | 1 | 142678373 | 142696755 | 18383  | 26  | 0.250724  | 0.011351 | 142678163 | 142678583 | 142696408 | 142697110 |
| 35 | NAO7029 | [2515685 chr1 | 1 | 142700151 | 142777852 | 77702  | 130 | 0.250724  | 0.011351 | 142699922 | 142700380 | 142778895 | 142778880 |
| 36 | NAO7029 | [2515685 chr1 | 1 | 145100273 | 145105440 | 5168   | 16  | 0.468333  | 0.032668 | 145100193 | 145100354 | 145105263 | 145105611 |
| 37 | NAO7029 | [2515685 chr1 | 1 | 145385613 | 145414168 | 28556  | 58  | 0.259729  | 0.01654  | 145385470 | 145385756 | 145413405 | 145414931 |
| 38 | NAO7029 | [2515685 chr1 | 1 | 145547641 | 145570848 | 23208  | 44  | 0.271575  | 0.018966 | 145547498 | 145547784 | 145570678 | 145571011 |
| 39 | NAO7029 | [2515685 chr1 | 1 | 145819541 | 145821079 | 1539   | 2   | 0.846862  | 0.103994 | 145819262 | 145819821 | 145820633 | 145821521 |
| 40 | NAO7029 | [2515685 chr1 | 1 | 145830801 | 145839481 | 8681   | 3   | 0.560236  | 0.083781 | 145830639 | 145830963 | 145839093 | 145839861 |
| 41 | NAO7029 | [2515685 chr1 | 1 | 145929568 | 145951531 | 21964  | 26  | 0.417263  | 0.028777 | 145929405 | 145929732 | 145951467 | 145951591 |
| 42 | NAO7029 | [2515685 chr1 | 1 | 146330898 | 146336084 | 5187   | 14  | 0.464492  | 0.034698 | 146330704 | 146331093 | 146336004 | 146336611 |
| 43 | NAO7029 | [2515685 chr1 | 1 | 146338987 | 146340977 | 1991   | 7   | 0.4346    | 0.04553  | 146338773 | 146339202 | 146340809 | 146341114 |
| 44 | NAO7029 | [2515685 chr1 | 1 | 146462721 | 146475780 | 13060  | 7   | 0.360202  | 0.049152 | 146462499 | 146462943 | 146473762 | 146477791 |
| 45 | NAO7029 | [2515685 chr1 | 1 | 146808546 | 146809451 | 906    | 2   | -0.624076 | 0.106794 | 146808090 | 146809003 | 146809142 | 146809761 |
| 46 | NAO7029 | [2515685 chr1 | 1 | 158226359 | 158231105 | 4747   | 8   | -0.275179 | 0.04263  | 158225685 | 158227033 | 158230227 | 158231981 |
| 47 | NAO7029 | [2515685 chr1 | 1 | 158233749 | 158238832 | 5084   | 7   | -0.263258 | 0.045962 | 158233086 | 158234413 | 158237607 | 158240051 |
| 48 | NAO7029 | [2515685 chr1 | 1 | 158241142 | 158245896 | 4755   | 8   | -0.275179 | 0.04263  | 158240466 | 158241818 | 158245018 | 158246771 |
| 49 | NAO7029 | [2515685 chr1 | 1 | 158248540 | 158253277 | 4738   | 8   | -0.27839  | 0.04263  | 158247877 | 158249204 | 158252398 | 158254151 |
| 50 | NAO7029 | [2515685 chr1 | 1 | 158291069 | 158377436 | 86368  | 102 | -0.263969 | 0.014178 | 158290403 | 158291735 | 158377203 | 158377671 |
| 51 | NAO7029 | [2515685 chr1 | 1 | 206859240 | 206939046 | 79807  | 2   | 0.447092  | 0.083824 | 206791904 | 206862509 | 206935777 | 206950471 |
| 52 | NAO7029 | [2515685 chr1 | 1 | 220570241 | 220571400 | 1160   | 2   | 0.528747  | 0.100652 | 220569940 | 220570543 | 220571101 | 220571701 |
| 53 | NAO7029 | [2515685 chr1 | 1 | 233202665 | 233204956 | 2292   | 42  | -0.714742 | 0.020338 | 233202312 | 233203018 | 233204364 | 233205541 |
| 54 | NAO7029 | [2515685 chr1 | 1 | 243009520 | 243011951 | 2432   | 4   | -0.451992 | 0.074037 | 243008430 | 243010610 | 243011533 | 243012361 |
| 55 | NAO7029 | [2515685 chr1 | 1 | 244850108 | 244851538 | 1431   | 2   | 0.613637  | 0.11177  | 244849536 | 244850681 | 244851004 | 244852071 |
| 56 | NAO7029 | [2515685 chr1 | 1 | 244872415 | 244874098 | 1684   | 5   | 0.543668  | 0.072391 | 244872245 | 244872585 | 244873799 | 244874439 |
| 57 | NAO7029 | [2515685 chr1 | 1 | 244932880 | 244936698 | 3819   | 7   | -0.33383  | 0.057531 | 244932708 | 244933053 | 244936297 | 244937101 |
| 58 | NAO7029 | [2515685 chr2 | 2 | 2971104   | 298925    | 1822   | 7   | 0.755521  | 0.061729 | 296699    | 297510    | 298661    | 299185    |
| 59 | NAO7029 | [2515685 chr2 | 2 | 386675    | 390704    | 4030   | 8   | 0.274137  | 0.05046  | 386420    | 386931    | 390173    | 391236    |
| 60 | NAO7029 | [2515685 chr2 | 2 | 35896477  | 35905932  | 9456   | 3   | -0.757435 | 0.082924 | 35879425  | 35899430  | 35902979  | 35909821  |
| 61 | NAO7029 | [2515685 chr2 | 2 | 44378695  | 44380701  | 2007   | 3   | -0.701078 | 0.078188 | 44378636  | 44378754  | 44379703  | 44381691  |
| 62 | NAO7029 | [2515685 chr2 | 2 | 61675589  | 61676777  | 1189   | 2   | 1.086786  | 0.135781 | 61675200  | 61675979  | 61676468  | 61677081  |
| 63 | NAO7029 | [2515685 chr2 | 2 | 87473293  | 87478765  | 5473   | 9   | 0.47236   | 0.04701  | 87472060  | 87474526  | 87478435  | 87479091  |
| 64 | NAO7029 | [2515685 chr2 | 2 | 97184386  | 97189735  | 5350   | 2   | -0.764185 | 0.102201 | 97182781  | 97185992  | 97186782  | 97196721  |
| 65 | NAO7029 | [2515685 chr2 | 2 | 97329019  | 97338679  | 9661   | 21  | 0.265181  | 0.030629 | 97328936  | 97329103  | 97338574  | 97338781  |
| 66 | NAO7029 | [2515685 chr2 | 2 | 97613796  | 97614932  | 1137   | 2   | 1.009743  | 0.117116 | 97613553  | 97614040  | 97614467  | 97615391  |
| 67 | NAO7029 | [2515685 chr2 | 2 | 106338419 | 106344320 | 5902   | 7   | -1.322419 | 0.072703 | 106337769 | 106339069 | 106344055 | 106344581 |
| 68 | NAO7029 | [2515685 chr2 | 2 | 111696774 | 111699147 | 2374   | 16  | 0.377887  | 0.035408 | 111696413 | 111697136 | 111698899 | 111699391 |
| 69 | NAO7029 | [2515685 chr2 | 2 | 126159437 | 126168349 | 8913   | 3   | -2.751138 | 0.130884 | 126158494 | 126160381 | 126168048 | 126168651 |

|     |         |               |   |           |           |        |     |           |          |           |           |           |          |
|-----|---------|---------------|---|-----------|-----------|--------|-----|-----------|----------|-----------|-----------|-----------|----------|
| 70  | NA07029 | [2515685 chr2 | 2 | 129354604 | 129360182 | 5579   | 4   | -0.789236 | 0.08522  | 129354317 | 129354892 | 129357659 | 12936270 |
| 71  | NA07029 | [2515685 chr2 | 2 | 129958566 | 129967168 | 8603   | 11  | -0.790408 | 0.047047 | 129958273 | 129958860 | 129966150 | 12996818 |
| 72  | NA07029 | [2515685 chr2 | 2 | 131030773 | 131037575 | 6803   | 14  | -0.591667 | 0.036985 | 131030629 | 131030917 | 131037431 | 13103771 |
| 73  | NA07029 | [2515685 chr2 | 2 | 132846945 | 132880027 | 33083  | 29  | 0.360747  | 0.027789 | 132846760 | 132847131 | 132879756 | 13288029 |
| 74  | NA07029 | [2515685 chr2 | 2 | 146694145 | 146710744 | 16600  | 17  | 0.881389  | 0.041316 | 146688620 | 146697098 | 146710557 | 14671093 |
| 75  | NA07029 | [2515685 chr2 | 2 | 153495550 | 153499409 | 3860   | 2   | 0.778135  | 0.123002 | 153484545 | 153498503 | 153498846 | 15349997 |
| 76  | NA07029 | [2515685 chr2 | 2 | 153622711 | 153625256 | 2546   | 3   | 0.90489   | 0.089836 | 153621175 | 153624247 | 153625088 | 15362542 |
| 77  | NA07029 | [2515685 chr2 | 2 | 208176479 | 208184457 | 7979   | 7   | 0.899532  | 0.058828 | 208176093 | 208176865 | 208183930 | 20818498 |
| 78  | NA07029 | [2515685 chr2 | 2 | 213009234 | 213016481 | 7248   | 8   | -0.966998 | 0.051628 | 213008915 | 213009554 | 213016164 | 21301679 |
| 79  | NA07029 | [2515685 chr2 | 2 | 232510540 | 232541443 | 30904  | 8   | -0.267324 | 0.043856 | 232509939 | 232511142 | 232540043 | 23254284 |
| 80  | NA07029 | [2515685 chr2 | 2 | 242430340 | 242432140 | 1801   | 2   | -0.60608  | 0.120133 | 242430091 | 242430589 | 242431346 | 24243293 |
| 81  | NA07029 | [2515685 chr3 | 3 | 204650    | 209394    | 4745   | 4   | -2.500516 | 0.120258 | 202918    | 206383    | 209009    | 209775   |
| 82  | NA07029 | [2515685 chr3 | 3 | 1757211   | 1765703   | 8493   | 2   | 0.851595  | 0.115467 | 1756096   | 1758327   | 1762058   | 179730   |
| 83  | NA07029 | [2515685 chr3 | 3 | 16213841  | 16216543  | 2703   | 2   | -0.587539 | 0.096529 | 16213419  | 16214264  | 16215641  | 16217444 |
| 84  | NA07029 | [2515685 chr3 | 3 | 24636987  | 24639392  | 2406   | 2   | 0.542472  | 0.100712 | 24636745  | 24637229  | 24637948  | 2464083  |
| 85  | NA07029 | [2515685 chr3 | 3 | 36031800  | 36032787  | 988    | 2   | -0.605475 | 0.101302 | 36031493  | 36032107  | 36032525  | 3603304  |
| 86  | NA07029 | [2515685 chr3 | 3 | 47798187  | 47798750  | 564    | 2   | 0.726709  | 0.110534 | 47798784  | 47798501  | 47798650  | 4779885  |
| 87  | NA07029 | [2515685 chr3 | 3 | 100426489 | 100432540 | 6052   | 6   | -0.84954  | 0.063112 | 100426149 | 100426829 | 100431494 | 10043358 |
| 88  | NA07029 | [2515685 chr3 | 3 | 113387620 | 113537850 | 150231 | 3   | 0.49124   | 0.083903 | 113386664 | 113388576 | 113534205 | 11357037 |
| 89  | NA07029 | [2515685 chr3 | 3 | 133191392 | 133196576 | 5185   | 5   | -0.772269 | 0.064306 | 133190820 | 133191965 | 133195824 | 13319732 |
| 90  | NA07029 | [2515685 chr3 | 3 | 163994592 | 164008330 | 13739  | 18  | 2.008456  | 0.025936 | 163993392 | 163995793 | 164008010 | 16400865 |
| 91  | NA07029 | [2515685 chr3 | 3 | 164031300 | 164106273 | 74974  | 74  | 2.008456  | 0.025936 | 164027655 | 164036948 | 164106029 | 16410651 |
| 92  | NA07029 | [2515685 chr3 | 3 | 164199936 | 164205886 | 5951   | 6   | -0.624583 | 0.06877  | 164199686 | 164200187 | 164204674 | 16420709 |
| 93  | NA07029 | [2515685 chr3 | 3 | 176561952 | 176567506 | 5555   | 5   | -0.869965 | 0.072789 | 176560250 | 176563654 | 176565991 | 17656902 |
| 94  | NA07029 | [2515685 chr3 | 3 | 191219813 | 191223326 | 3514   | 4   | 0.760974  | 0.076795 | 191219291 | 191220336 | 191222918 | 19122373 |
| 95  | NA07029 | [2515685 chr3 | 3 | 192547312 | 192554331 | 7020   | 10  | 0.936877  | 0.051726 | 192546950 | 192547674 | 192554127 | 19255453 |
| 96  | NA07029 | [2515685 chr3 | 3 | 196958848 | 196965802 | 6955   | 5   | -0.519327 | 0.063675 | 196956437 | 196961260 | 196965494 | 19696611 |
| 97  | NA07029 | [2515685 chr3 | 3 | 196991681 | 196993357 | 1677   | 7   | 0.684521  | 0.064969 | 196991423 | 196991939 | 196993124 | 19699359 |
| 98  | NA07029 | [2515685 chr3 | 3 | 198422794 | 198427408 | 4615   | 2   | 0.946756  | 0.13091  | 198422381 | 198423207 | 198423959 | 19843085 |
| 99  | NA07029 | [2515685 chr3 | 3 | 199313925 | 199321063 | 7139   | 15  | -0.579583 | 0.034098 | 199313515 | 199314336 | 199320844 | 19932128 |
| 100 | NA07029 | [2515685 chr4 | 4 | 639659    | 640828    | 1170   | 2   | 0.805171  | 0.126885 | 639291    | 640028    | 640478    | 641178   |
| 101 | NA07029 | [2515685 chr4 | 4 | 697116    | 698517    | 1402   | 2   | -0.483437 | 0.09524  | 696681    | 697551    | 698280    | 698755   |
| 102 | NA07029 | [2515685 chr4 | 4 | 8740931   | 8756949   | 16019  | 23  | 0.554623  | 0.024629 | 8740864   | 8740999   | 8756813   | 875708   |
| 103 | NA07029 | [2515685 chr4 | 4 | 9812346   | 9813108   | 763    | 33  | 0.273566  | 0.019853 | 9812284   | 9812408   | 9812952   | 981326   |
| 104 | NA07029 | [2515685 chr4 | 4 | 9887220   | 9911397   | 24178  | 31  | 1.75195   | 0.040504 | 9886886   | 9887555   | 9910388   | 991240   |
| 105 | NA07029 | [2515685 chr4 | 4 | 34602797  | 34650994  | 48198  | 45  | 0.805576  | 0.024247 | 34601994  | 34603600  | 34649535  | 3465245  |
| 106 | NA07029 | [2515685 chr4 | 4 | 49056186  | 49080998  | 24813  | 42  | -0.270216 | 0.022256 | 49056106  | 49056267  | 49080923  | 4908107  |
| 107 | NA07029 | [2515685 chr4 | 4 | 49400450  | 49422181  | 21732  | 40  | -0.276917 | 0.022082 | 49400386  | 49400515  | 49422125  | 4942223  |
| 108 | NA07029 | [2515685 chr4 | 4 | 63500374  | 63504889  | 4516   | 5   | -3.635653 | 0.155523 | 63494261  | 63503440  | 63504639  | 6350514  |
| 109 | NA07029 | [2515685 chr4 | 4 | 64522941  | 64543857  | 20917  | 20  | -0.7364   | 0.037323 | 64522682  | 64523201  | 64542552  | 6454516  |
| 110 | NA07029 | [2515685 chr4 | 4 | 69202095  | 69319814  | 117720 | 72  | 1.056582  | 0.022796 | 69201955  | 69202236  | 69319569  | 6932005  |
| 111 | NA07029 | [2515685 chr4 | 4 | 69319814  | 69341211  | 21398  | 18  | 0.36225   | 0.019191 | 69319569  | 69320059  | 69340966  | 6934145  |
| 112 | NA07029 | [2515685 chr4 | 4 | 69347741  | 69365270  | 17530  | 20  | 0.36225   | 0.019191 | 69347112  | 69348370  | 69365129  | 6936541  |
| 113 | NA07029 | [2515685 chr4 | 4 | 69672033  | 69693234  | 21202  | 23  | 0.343165  | 0.018118 | 69671975  | 69672092  | 69692988  | 6969348  |
| 114 | NA07029 | [2515685 chr4 | 4 | 69701351  | 69717280  | 15930  | 22  | 0.343165  | 0.018118 | 69701125  | 69701577  | 69717139  | 6971742  |
| 115 | NA07029 | [2515685 chr4 | 4 | 70294527  | 70416062  | 121536 | 127 | 0.423507  | 0.013539 | 70294392  | 70294663  | 70415760  | 7041636  |
| 116 | NA07029 | [2515685 chr4 | 4 | 104136241 | 104142022 | 5782   | 3   | -0.88315  | 0.106854 | 104135701 | 104136782 | 104140815 | 10414323 |
| 117 | NA07029 | [2515685 chr4 | 4 | 108421061 | 108433405 | 12345  | 13  | -0.734107 | 0.045349 | 108420157 | 108421965 | 108432804 | 10843400 |
| 118 | NA07029 | [2515685 chr4 | 4 | 115534210 | 115541546 | 7337   | 9   | -2.702699 | 0.094769 | 115530015 | 115537276 | 115539984 | 11554310 |
| 119 | NA07029 | [2515685 chr4 | 4 | 124835704 | 124837199 | 1496   | 3   | -0.53414  | 0.082619 | 124835418 | 124835991 | 124836924 | 12483747 |
| 120 | NA07029 | [2515685 chr4 | 4 | 133536192 | 133540723 | 4532   | 3   | -0.608686 | 0.099452 | 133531398 | 133539258 | 133540462 | 13354098 |
| 121 | NA07029 | [2515685 chr4 | 4 | 138449561 | 138457787 | 8227   | 7   | -0.967644 | 0.06137  | 138448993 | 138450130 | 138457283 | 13845829 |
| 122 | NA07029 | [2515685 chr4 | 4 | 138537751 | 138549906 | 12156  | 14  | 0.915883  | 0.046042 | 138537443 | 138538059 | 138547414 | 13855239 |
| 123 | NA07029 | [2515685 chr4 | 4 | 145241837 | 145245588 | 3752   | 3   | -0.641946 | 0.098167 | 145241488 | 145242187 | 145245192 | 14524598 |
| 124 | NA07029 | [2515685 chr4 | 4 | 155038793 | 155039879 | 1087   | 2   | 0.759522  | 0.110741 | 155038408 | 155039178 | 155039565 | 15504019 |

|     |         |               |   |           |           |        |      |           |          |           |           |           |          |
|-----|---------|---------------|---|-----------|-----------|--------|------|-----------|----------|-----------|-----------|-----------|----------|
| 125 | NA07029 | [2515685 chr4 | 4 | 157318707 | 157331504 | 12798  | 14   | -0.794808 | 0.045008 | 157316408 | 157321006 | 157331168 | 15733184 |
| 126 | NA07029 | [2515685 chr4 | 4 | 162578301 | 162579832 | 1532   | 2    | -0.714399 | 0.114986 | 162577752 | 162578850 | 162579615 | 16258004 |
| 127 | NA07029 | [2515685 chr4 | 4 | 162806038 | 162809269 | 3232   | 3    | 0.907914  | 0.086298 | 162804872 | 162807204 | 162808734 | 16280980 |
| 128 | NA07029 | [2515685 chr4 | 4 | 169184442 | 169368370 | 183929 | 161  | 0.805566  | 0.012433 | 169184090 | 169184794 | 169366713 | 16937002 |
| 129 | NA07029 | [2515685 chr4 | 4 | 173363594 | 173367718 | 4125   | 6    | -0.756639 | 0.062818 | 173362583 | 173364606 | 173367283 | 17336815 |
| 130 | NA07029 | [2515685 chr4 | 4 | 185533276 | 185534552 | 1277   | 2    | 0.872793  | 0.130526 | 185532696 | 185533857 | 185534150 | 18553495 |
| 131 | NA07029 | [2515685 chr4 | 4 | 185535274 | 185544849 | 9576   | 9    | 0.935277  | 0.052766 | 185534955 | 185535593 | 185543276 | 18554642 |
| 132 | NA07029 | [2515685 chr4 | 4 | 187728494 | 187732907 | 4414   | 15   | 1.84913   | 0.05022  | 187728193 | 187728795 | 187732541 | 18773327 |
| 133 | NA07029 | [2515685 chr4 | 4 | 188255523 | 188269680 | 14158  | 235  | 0.669353  | 0.008922 | 188255215 | 188255831 | 188269403 | 18826995 |
| 134 | NA07029 | [2515685 chr4 | 4 | 190528602 | 190533163 | 4562   | 21   | -0.7246   | 0.034235 | 190528058 | 190529146 | 190531664 | 19053466 |
| 135 | NA07029 | [2515685 chr4 | 4 | 190941429 | 190949181 | 7753   | 10   | 0.345403  | 0.043991 | 190941038 | 190941820 | 190948972 | 19094939 |
| 136 | NA07029 | [2515685 chr5 | 5 | 261631    | 263283    | 1653   | 9    | 0.316223  | 0.052585 | 261032    | 262230    | 262766    | 263801   |
| 137 | NA07029 | [2515685 chr5 | 5 | 863352    | 869036    | 5685   | 4    | 0.399147  | 0.071815 | 863113    | 863592    | 867979    | 870095   |
| 138 | NA07029 | [2515685 chr5 | 5 | 1231558   | 1233247   | 1690   | 2    | -0.844653 | 0.100507 | 1231167   | 1231949   | 1232879   | 1233615  |
| 139 | NA07029 | [2515685 chr5 | 5 | 12863961  | 12873512  | 9552   | 14   | -0.80145  | 0.045352 | 12863778  | 12864144  | 12873198  | 12873827 |
| 140 | NA07029 | [2515685 chr5 | 5 | 19410747  | 19412172  | 1426   | 3    | -2.540332 | 0.151395 | 19410189  | 19411305  | 19411980  | 19412361 |
| 141 | NA07029 | [2515685 chr5 | 5 | 21306897  | 21427569  | 120673 | 185  | 0.291623  | 0.009855 | 21306668  | 21307127  | 21426744  | 21428394 |
| 142 | NA07029 | [2515685 chr5 | 5 | 21483394  | 21488147  | 4754   | 4    | -2.062965 | 0.102148 | 21480817  | 21485972  | 21487855  | 21488435 |
| 143 | NA07029 | [2515685 chr5 | 5 | 21539354  | 21556393  | 17040  | 34   | 0.280436  | 0.02224  | 21538825  | 21539883  | 21556081  | 21556701 |
| 144 | NA07029 | [2515685 chr5 | 5 | 21971730  | 21976904  | 5175   | 11   | 0.484904  | 0.039096 | 21971258  | 21972202  | 21976632  | 21977171 |
| 145 | NA07029 | [2515685 chr5 | 5 | 22161955  | 22166982  | 5028   | 7    | 0.371559  | 0.059563 | 22161504  | 22162407  | 22166620  | 22167341 |
| 146 | NA07029 | [2515685 chr5 | 5 | 26831997  | 26837938  | 5942   | 6    | 0.731501  | 0.065808 | 26829858  | 26834136  | 26837469  | 26838401 |
| 147 | NA07029 | [2515685 chr5 | 5 | 32347584  | 32349795  | 2212   | 2    | 0.636004  | 0.119682 | 32347179  | 32347990  | 32349254  | 32350337 |
| 148 | NA07029 | [2515685 chr5 | 5 | 34226627  | 34242460  | 15834  | 35   | 0.259315  | 0.011869 | 34226515  | 34226739  | 34242396  | 34242527 |
| 149 | NA07029 | [2515685 chr5 | 5 | 34243324  | 34292673  | 49350  | 82   | 0.259315  | 0.011869 | 34243277  | 34243371  | 34291585  | 34293767 |
| 150 | NA07029 | [2515685 chr5 | 5 | 57359558  | 57369858  | 10301  | 9    | 1.842571  | 0.072213 | 57359213  | 57359904  | 57367789  | 57371921 |
| 151 | NA07029 | [2515685 chr5 | 5 | 68863051  | 68890040  | 26990  | 59   | 0.266462  | 0.002054 | 68862708  | 68863394  | 68889779  | 68890307 |
| 152 | NA07029 | [2515685 chr5 | 5 | 68891974  | 68971584  | 79611  | 136  | 0.266462  | 0.002054 | 68891826  | 68892123  | 68971461  | 68971701 |
| 153 | NA07029 | [2515685 chr5 | 5 | 68977148  | 68998995  | 21848  | 47   | 0.266462  | 0.002054 | 68976611  | 68977685  | 68998931  | 68999051 |
| 154 | NA07029 | [2515685 chr5 | 5 | 69000288  | 69578736  | 578449 | 1170 | 0.266462  | 0.002054 | 69000812  | 69000764  | 69578672  | 69578801 |
| 155 | NA07029 | [2515685 chr5 | 5 | 69580029  | 69875100  | 295072 | 623  | 0.266462  | 0.002054 | 69579553  | 69580505  | 69875036  | 69875164 |
| 156 | NA07029 | [2515685 chr5 | 5 | 69876393  | 70579062  | 702670 | 1307 | 0.266462  | 0.002054 | 69875917  | 69876869  | 70578998  | 70579121 |
| 157 | NA07029 | [2515685 chr5 | 5 | 70580346  | 70696078  | 115733 | 254  | 0.266462  | 0.002054 | 70579879  | 70580814  | 70695658  | 70696491 |
| 158 | NA07029 | [2515685 chr5 | 5 | 81459212  | 81466056  | 6845   | 2    | -1.343286 | 0.121409 | 81455614  | 81462405  | 81462863  | 81470281 |
| 159 | NA07029 | [2515685 chr5 | 5 | 93928460  | 93933101  | 4642   | 4    | -0.414056 | 0.07901  | 93927706  | 93929215  | 93931984  | 93934211 |
| 160 | NA07029 | [2515685 chr5 | 5 | 97427204  | 97428353  | 1150   | 2    | 0.963855  | 0.117829 | 97426913  | 97427496  | 97428177  | 97428521 |
| 161 | NA07029 | [2515685 chr5 | 5 | 99408801  | 99419037  | 10237  | 14   | -0.574943 | 0.040171 | 99408605  | 99408997  | 99418328  | 99419741 |
| 162 | NA07029 | [2515685 chr5 | 5 | 104458513 | 104530911 | 72399  | 71   | -0.773082 | 0.019251 | 104453469 | 104461706 | 104529078 | 10453274 |
| 163 | NA07029 | [2515685 chr5 | 5 | 122649189 | 122651412 | 2224   | 3    | 0.464994  | 0.089422 | 122648933 | 122649446 | 122650032 | 12265279 |
| 164 | NA07029 | [2515685 chr5 | 5 | 128693039 | 128775008 | 81970  | 90   | -0.784173 | 0.016835 | 128692544 | 128693534 | 128774819 | 12877519 |
| 165 | NA07029 | [2515685 chr5 | 5 | 137838768 | 137844134 | 5367   | 4    | 0.779744  | 0.084893 | 137838364 | 137839173 | 137843310 | 13784495 |
| 166 | NA07029 | [2515685 chr5 | 5 | 140203081 | 140217091 | 14011  | 18   | 2.111844  | 0.056039 | 140202344 | 140203819 | 140216552 | 14021763 |
| 167 | NA07029 | [2515685 chr5 | 5 | 155408303 | 155424012 | 15710  | 11   | -0.87774  | 0.050898 | 155405622 | 155410984 | 155420819 | 15542761 |
| 168 | NA07029 | [2515685 chr5 | 5 | 178994494 | 178994971 | 478    | 2    | -0.528265 | 0.092714 | 178994223 | 178994766 | 178994768 | 17899517 |
| 169 | NA07029 | [2515685 chr5 | 5 | 179016786 | 179017263 | 478    | 2    | -0.528263 | 0.092713 | 179016582 | 179016990 | 179016992 | 17901753 |
| 170 | NA07029 | [2515685 chr5 | 5 | 180275137 | 180280228 | 5092   | 5    | 0.496721  | 0.072682 | 180273651 | 180276623 | 180277035 | 18028376 |
| 171 | NA07029 | [2515685 chr5 | 5 | 180306298 | 180309236 | 2939   | 5    | -0.393113 | 0.062378 | 180305337 | 180307260 | 180309103 | 18030937 |
| 172 | NA07029 | [2515685 chr5 | 5 | 180309823 | 180363417 | 53595  | 51   | -1.013693 | 0.025359 | 180309690 | 180309956 | 180363120 | 18036371 |
| 173 | NA07029 | [2515685 chr5 | 5 | 180418059 | 180419113 | 1055   | 2    | 0.733001  | 0.127523 | 180417894 | 180418224 | 180418598 | 18041962 |
| 174 | NA07029 | [2515685 chr6 | 6 | 3163      | 21917     | 18755  | 7    | 0.415151  | 0.054481 | 1         | 6325      | 21741     | 22093    |
| 175 | NA07029 | [2515685 chr6 | 6 | 201823    | 235965    | 34143  | 24   | -0.434917 | 0.030441 | 201415    | 202232    | 235368    | 236565   |
| 176 | NA07029 | [2515685 chr6 | 6 | 240929    | 324395    | 83467  | 97   | 0.326066  | 0.014404 | 240278    | 241581    | 323926    | 324865   |
| 177 | NA07029 | [2515685 chr6 | 6 | 19149239  | 19156670  | 7432   | 10   | -0.848017 | 0.049479 | 19148813  | 19149665  | 19153876  | 19159461 |
| 178 | NA07029 | [2515685 chr6 | 6 | 27033591  | 27040840  | 7250   | 16   | 0.386823  | 0.033705 | 27033178  | 27034005  | 27040641  | 27041041 |
| 179 | NA07029 | [2515685 chr6 | 6 | 29958572  | 30001639  | 43068  | 38   | 0.405543  | 0.021584 | 29957670  | 29959474  | 30001478  | 30001807 |

|     |         |               |   |           |           |        |    |           |          |           |           |           |          |
|-----|---------|---------------|---|-----------|-----------|--------|----|-----------|----------|-----------|-----------|-----------|----------|
| 180 | NA07029 | [2515685 chr6 | 6 | 30006099  | 30011802  | 5704   | 4  | 0.405543  | 0.021584 | 30005363  | 30006836  | 30011083  | 30012527 |
| 181 | NA07029 | [2515685 chr6 | 6 | 31383567  | 31387065  | 3499   | 4  | -0.639766 | 0.07613  | 31383185  | 31383949  | 31386395  | 31387731 |
| 182 | NA07029 | [2515685 chr6 | 6 | 32565102  | 32586862  | 21761  | 3  | -0.783297 | 0.144388 | 32564888  | 32565316  | 32586127  | 32587597 |
| 183 | NA07029 | [2515685 chr6 | 6 | 32605125  | 32605958  | 834    | 2  | -0.916362 | 0.121707 | 32604923  | 32605328  | 32605760  | 32606151 |
| 184 | NA07029 | [2515685 chr6 | 6 | 32609317  | 32617043  | 7727   | 4  | -0.362377 | 0.064547 | 32609117  | 32609518  | 32613543  | 32626577 |
| 185 | NA07029 | [2515685 chr6 | 6 | 32653862  | 32654720  | 859    | 2  | 1.145611  | 0.162105 | 32653679  | 32654046  | 32654460  | 32654981 |
| 186 | NA07029 | [2515685 chr6 | 6 | 32678696  | 32680751  | 2056   | 3  | 0.542414  | 0.089476 | 32678507  | 32678885  | 32680547  | 32680951 |
| 187 | NA07029 | [2515685 chr6 | 6 | 32702716  | 32705737  | 3022   | 3  | -0.48834  | 0.073991 | 32702285  | 32703148  | 32704019  | 32707451 |
| 188 | NA07029 | [2515685 chr6 | 6 | 54036900  | 54042384  | 5485   | 5  | 3.903579  | 0.146395 | 54036573  | 54037227  | 54041771  | 54042991 |
| 189 | NA07029 | [2515685 chr6 | 6 | 62338501  | 62343650  | 5150   | 2  | -0.637818 | 0.098421 | 62334618  | 62342001  | 62342340  | 62344961 |
| 190 | NA07029 | [2515685 chr6 | 6 | 77495034  | 77513511  | 18478  | 12 | 0.796907  | 0.0481   | 77493568  | 77496500  | 77510011  | 77517691 |
| 191 | NA07029 | [2515685 chr6 | 6 | 81338147  | 81350271  | 12125  | 11 | -0.791169 | 0.046827 | 81334276  | 81341647  | 81350013  | 81350531 |
| 192 | NA07029 | [2515685 chr6 | 6 | 110503022 | 110518328 | 15307  | 20 | -0.675861 | 0.034865 | 110502679 | 110503366 | 110516599 | 11052005 |
| 193 | NA07029 | [2515685 chr6 | 6 | 120671191 | 120671916 | 726    | 2  | 1.257522  | 0.108605 | 120670696 | 120671686 | 120671725 | 12067210 |
| 194 | NA07029 | [2515685 chr6 | 6 | 168780035 | 168781989 | 1955   | 4  | 0.364813  | 0.069341 | 168779504 | 168780567 | 168781555 | 16878242 |
| 195 | NA07029 | [2515685 chr6 | 6 | 170603879 | 170604666 | 788    | 2  | -2.395459 | 0.134383 | 170603541 | 170604217 | 170604339 | 17060499 |
| 196 | NA07029 | [2515685 chr6 | 6 | 170625506 | 170627028 | 1523   | 3  | 2.477399  | 0.142441 | 170625015 | 170625997 | 170626579 | 17062747 |
| 197 | NA07029 | [2515685 chr6 | 6 | 170684555 | 170687261 | 2707   | 6  | -0.727356 | 0.062938 | 170684170 | 170684940 | 170686870 | 17068765 |
| 198 | NA07029 | [2515685 chr7 | 7 | 3384744   | 3392458   | 7715   | 7  | 0.866766  | 0.061146 | 3383451   | 3386038   | 3390107   | 3395611  |
| 199 | NA07029 | [2515685 chr7 | 7 | 13418340  | 13420467  | 2128   | 2  | 0.586518  | 0.1131   | 13418037  | 13418644  | 13419222  | 13421771 |
| 200 | NA07029 | [2515685 chr7 | 7 | 38154080  | 38177664  | 23585  | 27 | -0.354526 | 0.027169 | 38153653  | 38154508  | 38177341  | 38177987 |
| 201 | NA07029 | [2515685 chr7 | 7 | 56415682  | 56544240  | 128559 | 4  | -0.605773 | 0.072131 | 56286086  | 56418033  | 56542365  | 56546111 |
| 202 | NA07029 | [2515685 chr7 | 7 | 62123217  | 62128473  | 5257   | 15 | -0.384011 | 0.039204 | 62122354  | 62124081  | 62128063  | 62128887 |
| 203 | NA07029 | [2515685 chr7 | 7 | 62254645  | 62255088  | 444    | 3  | 0.902744  | 0.087979 | 62254635  | 62254655  | 62254924  | 62255257 |
| 204 | NA07029 | [2515685 chr7 | 7 | 62302079  | 62302522  | 444    | 3  | 0.902771  | 0.08798  | 62301915  | 62302243  | 62302512  | 62302537 |
| 205 | NA07029 | [2515685 chr7 | 7 | 62423752  | 62430522  | 6771   | 18 | -0.452235 | 0.035342 | 62423322  | 62424183  | 62429779  | 62431261 |
| 206 | NA07029 | [2515685 chr7 | 7 | 64463334  | 64481591  | 18258  | 48 | -0.258176 | 0.020255 | 64462999  | 64463669  | 64481417  | 64481761 |
| 207 | NA07029 | [2515685 chr7 | 7 | 64538610  | 64556662  | 18053  | 49 | -0.269297 | 0.019931 | 64537873  | 64539348  | 64556244  | 64557081 |
| 208 | NA07029 | [2515685 chr7 | 7 | 71487853  | 71491635  | 3783   | 2  | -0.498561 | 0.097727 | 71487606  | 71488100  | 71489994  | 71493277 |
| 209 | NA07029 | [2515685 chr7 | 7 | 71858493  | 71859326  | 834    | 2  | -0.632591 | 0.085513 | 71858284  | 71858703  | 71858719  | 71859937 |
| 210 | NA07029 | [2515685 chr7 | 7 | 71946819  | 71950998  | 4180   | 8  | -0.358215 | 0.042449 | 71946491  | 71947147  | 71950753  | 71951247 |
| 211 | NA07029 | [2515685 chr7 | 7 | 72014016  | 72014871  | 856    | 3  | 0.942092  | 0.077179 | 72013991  | 72014042  | 72014598  | 72015147 |
| 212 | NA07029 | [2515685 chr7 | 7 | 72156868  | 72157708  | 841    | 2  | -0.632596 | 0.085513 | 72156657  | 72157079  | 72157095  | 72158327 |
| 213 | NA07029 | [2515685 chr7 | 7 | 73823778  | 73824413  | 636    | 3  | 0.910788  | 0.082204 | 73823755  | 73823801  | 73824363  | 73824467 |
| 214 | NA07029 | [2515685 chr7 | 7 | 74096901  | 74097754  | 854    | 3  | 0.942092  | 0.077179 | 74096630  | 74097173  | 74097729  | 74097781 |
| 215 | NA07029 | [2515685 chr7 | 7 | 74511185  | 74511943  | 759    | 3  | 0.942139  | 0.07718  | 74511009  | 74511362  | 74511918  | 74511961 |
| 216 | NA07029 | [2515685 chr7 | 7 | 74575153  | 74579322  | 4170   | 9  | -0.3364   | 0.039783 | 74574913  | 74575393  | 74578995  | 74579651 |
| 217 | NA07029 | [2515685 chr7 | 7 | 74603178  | 74607347  | 4170   | 9  | -0.3364   | 0.039783 | 74602938  | 74603418  | 74607020  | 74607671 |
| 218 | NA07029 | [2515685 chr7 | 7 | 74695370  | 74696139  | 770    | 3  | -0.577157 | 0.075338 | 74695306  | 74695434  | 74695977  | 74696307 |
| 219 | NA07029 | [2515685 chr7 | 7 | 76308448  | 76312367  | 3920   | 8  | -0.320564 | 0.04234  | 76307846  | 76309051  | 76312081  | 76312657 |
| 220 | NA07029 | [2515685 chr7 | 7 | 76347603  | 76352770  | 5168   | 6  | -0.413946 | 0.061182 | 76347374  | 76347833  | 76352456  | 76353087 |
| 221 | NA07029 | [2515685 chr7 | 7 | 89455601  | 89456632  | 1032   | 2  | 3.676249  | 0.194832 | 89455373  | 89455830  | 89456225  | 89457037 |
| 222 | NA07029 | [2515685 chr7 | 7 | 92971481  | 92976895  | 5415   | 4  | 0.664923  | 0.086095 | 92971060  | 92971903  | 92975569  | 92978227 |
| 223 | NA07029 | [2515685 chr7 | 7 | 99513362  | 99513912  | 551    | 2  | 0.884574  | 0.095568 | 99513133  | 99513592  | 99513623  | 99514207 |
| 224 | NA07029 | [2515685 chr7 | 7 | 99542714  | 99551309  | 8596   | 12 | -0.264182 | 0.033996 | 99541225  | 99544203  | 99551114  | 99551507 |
| 225 | NA07029 | [2515685 chr7 | 7 | 100177861 | 100181973 | 4113   | 2  | -0.515086 | 0.091629 | 100177385 | 100178338 | 100180328 | 10018361 |
| 226 | NA07029 | [2515685 chr7 | 7 | 109034783 | 109048749 | 13967  | 10 | 1.582543  | 0.065578 | 109024063 | 109037134 | 109046953 | 10905054 |
| 227 | NA07029 | [2515685 chr7 | 7 | 109776378 | 109782655 | 6278   | 5  | 0.985945  | 0.077841 | 109775821 | 109776936 | 109782301 | 10978301 |
| 228 | NA07029 | [2515685 chr7 | 7 | 115531433 | 115535130 | 3698   | 2  | -0.817966 | 0.115111 | 115523520 | 115533784 | 115534405 | 11553585 |
| 229 | NA07029 | [2515685 chr7 | 7 | 125264357 | 125270165 | 5809   | 7  | 0.318882  | 0.060703 | 125263601 | 125265113 | 125269893 | 12527043 |
| 230 | NA07029 | [2515685 chr7 | 7 | 125640246 | 125644775 | 4530   | 5  | -0.849945 | 0.083004 | 125639961 | 125640532 | 125644046 | 12564550 |
| 231 | NA07029 | [2515685 chr7 | 7 | 133243381 | 133245202 | 1822   | 2  | 0.62478   | 0.101118 | 133243008 | 133243755 | 133244207 | 13324619 |
| 232 | NA07029 | [2515685 chr7 | 7 | 133245202 | 133257360 | 12159  | 13 | 2.343357  | 0.070722 | 133244207 | 133246197 | 133255009 | 13326093 |
| 233 | NA07029 | [2515685 chr7 | 7 | 141505136 | 141521152 | 16017  | 19 | 0.674432  | 0.03646  | 141504428 | 141505844 | 141520892 | 14152141 |
| 234 | NA07029 | [2515685 chr7 | 7 | 141759291 | 141761893 | 2603   | 3  | -0.590027 | 0.088198 | 141758892 | 141759690 | 141761589 | 14176219 |

|     |         |                |    |           |           |        |     |           |          |           |           |           |          |
|-----|---------|----------------|----|-----------|-----------|--------|-----|-----------|----------|-----------|-----------|-----------|----------|
| 235 | NA07029 | [2515685 chr7  | 7  | 141960848 | 141993247 | 32400  | 38  | -0.325356 | 0.023465 | 141960004 | 141961693 | 141992651 | 14199384 |
| 236 | NA07029 | [2515685 chr7  | 7  | 142733905 | 142785614 | 51710  | 60  | -0.270728 | 0.007642 | 142733678 | 142734133 | 142785534 | 14278569 |
| 237 | NA07029 | [2515685 chr7  | 7  | 142795453 | 142863185 | 67733  | 100 | -0.270728 | 0.007642 | 142794993 | 142795913 | 142862808 | 14286356 |
| 238 | NA07029 | [2515685 chr7  | 7  | 142893148 | 143009302 | 116155 | 160 | -0.270728 | 0.007642 | 142892611 | 142893685 | 143009099 | 14300950 |
| 239 | NA07029 | [2515685 chr7  | 7  | 143320629 | 143415599 | 94971  | 169 | 0.382315  | 0.007419 | 143320373 | 143320886 | 143415580 | 14341561 |
| 240 | NA07029 | [2515685 chr7  | 7  | 143420642 | 143500242 | 79601  | 159 | 0.382315  | 0.007419 | 143420120 | 143421165 | 143499999 | 14350048 |
| 241 | NA07029 | [2515685 chr7  | 7  | 143503774 | 143511719 | 7946   | 16  | 0.382315  | 0.007419 | 143503497 | 143504051 | 143511270 | 14351216 |
| 242 | NA07029 | [2515685 chr7  | 7  | 156939035 | 156942423 | 3389   | 5   | 0.369954  | 0.05528  | 156938932 | 156939138 | 156941474 | 15694337 |
| 243 | NA07029 | [2515685 chr7  | 7  | 156976112 | 156978464 | 2353   | 2   | 1.027865  | 0.10519  | 156975812 | 156976413 | 156977896 | 15697903 |
| 244 | NA07029 | [2515685 chr7  | 7  | 158207288 | 158209880 | 2593   | 2   | 0.667378  | 0.116001 | 158206344 | 158208233 | 158209333 | 15821042 |
| 245 | NA07029 | [2515685 chr7  | 7  | 158617060 | 158624379 | 7320   | 6   | 0.883748  | 0.068222 | 158616763 | 158617357 | 158622028 | 15862673 |
| 246 | NA07029 | [2515685 chr8  | 8  | 345497    | 346408    | 912    | 2   | 1.150389  | 0.114443 | 345046    | 345949    | 346376    | 346440   |
| 247 | NA07029 | [2515685 chr8  | 8  | 1328256   | 1343509   | 15254  | 45  | -0.468903 | 0.020108 | 1327688   | 1328824   | 1342795   | 134422   |
| 248 | NA07029 | [2515685 chr8  | 8  | 3885315   | 3887416   | 2102   | 2   | 0.631557  | 0.099778 | 3885089   | 3885542   | 3886275   | 388855   |
| 249 | NA07029 | [2515685 chr8  | 8  | 4587639   | 4588884   | 1246   | 2   | 0.485335  | 0.089819 | 4587366   | 4587912   | 4588543   | 458922   |
| 250 | NA07029 | [2515685 chr8  | 8  | 5582875   | 5594011   | 11137  | 9   | 0.787829  | 0.047635 | 5582615   | 5583135   | 5592820   | 559520   |
| 251 | NA07029 | [2515685 chr8  | 8  | 5606419   | 5608402   | 1984   | 2   | -0.624443 | 0.109701 | 5605995   | 5606844   | 5607751   | 560905   |
| 252 | NA07029 | [2515685 chr8  | 8  | 5817892   | 5820042   | 2151   | 2   | -0.736604 | 0.125287 | 5817072   | 5818713   | 5819661   | 582042   |
| 253 | NA07029 | [2515685 chr8  | 8  | 6859067   | 6859687   | 621    | 2   | 0.534223  | 0.097816 | 6858790   | 6859345   | 6859435   | 685994   |
| 254 | NA07029 | [2515685 chr8  | 8  | 7099851   | 7140759   | 40909  | 182 | 0.373522  | 0.009092 | 7099790   | 7099913   | 7140745   | 714077   |
| 255 | NA07029 | [2515685 chr8  | 8  | 7260002   | 7261450   | 1449   | 2   | 0.748681  | 0.125062 | 7259534   | 7260470   | 7261174   | 726172   |
| 256 | NA07029 | [2515685 chr8  | 8  | 7396178   | 7430731   | 34554  | 146 | 0.367571  | 0.010126 | 7396165   | 7396192   | 7430300   | 743116   |
| 257 | NA07029 | [2515685 chr8  | 8  | 7608391   | 7664722   | 56332  | 255 | 0.387608  | 0.007665 | 7608330   | 7608453   | 7664708   | 766473   |
| 258 | NA07029 | [2515685 chr8  | 8  | 7765788   | 7773470   | 7683   | 11  | 0.253355  | 0.041938 | 7765577   | 7765999   | 7773367   | 777357   |
| 259 | NA07029 | [2515685 chr8  | 8  | 7909185   | 7928723   | 19539  | 80  | 0.382989  | 0.013753 | 7908888   | 7909482   | 7928292   | 792915   |
| 260 | NA07029 | [2515685 chr8  | 8  | 12064826  | 12072888  | 8063   | 27  | 0.380688  | 0.024556 | 12064663  | 12064989  | 12072625  | 1207315  |
| 261 | NA07029 | [2515685 chr8  | 8  | 12314107  | 12322179  | 8073   | 24  | 0.352835  | 0.025768 | 12313944  | 12314270  | 12321906  | 1232245  |
| 262 | NA07029 | [2515685 chr8  | 8  | 17671955  | 17673956  | 2002   | 3   | 0.451436  | 0.073757 | 17671619  | 17672291  | 17673575  | 1767433  |
| 263 | NA07029 | [2515685 chr8  | 8  | 20022286  | 20024771  | 2486   | 2   | -1.200481 | 0.134866 | 20021082  | 20023491  | 20024338  | 2002520  |
| 264 | NA07029 | [2515685 chr8  | 8  | 25028407  | 25046917  | 18511  | 15  | -0.868667 | 0.039076 | 25027885  | 25028930  | 25046777  | 2504705  |
| 265 | NA07029 | [2515685 chr8  | 8  | 39351178  | 39506673  | 155496 | 161 | 0.798796  | 0.01247  | 39350826  | 39351530  | 39505284  | 3950806  |
| 266 | NA07029 | [2515685 chr8  | 8  | 39716664  | 39716976  | 313    | 2   | -0.465903 | 0.092772 | 39716554  | 39716775  | 39716857  | 3971709  |
| 267 | NA07029 | [2515685 chr8  | 8  | 49081430  | 49084499  | 3070   | 2   | 0.960775  | 0.115078 | 49079497  | 49083364  | 49084089  | 4908491  |
| 268 | NA07029 | [2515685 chr8  | 8  | 58276887  | 58283471  | 6585   | 6   | 0.447703  | 0.055197 | 58276659  | 58277116  | 58283237  | 5828370  |
| 269 | NA07029 | [2515685 chr8  | 8  | 85423649  | 85431920  | 8272   | 7   | 1.041486  | 0.059148 | 85423043  | 85424256  | 85431347  | 8543249  |
| 270 | NA07029 | [2515685 chr8  | 8  | 86742169  | 86910255  | 168087 | 105 | 0.295111  | 0.012187 | 86741757  | 86742581  | 86910002  | 8691050  |
| 271 | NA07029 | [2515685 chr8  | 8  | 120222660 | 120229952 | 7293   | 6   | 0.877299  | 0.063894 | 120218251 | 120225414 | 120229434 | 12023047 |
| 272 | NA07029 | [2515685 chr8  | 8  | 145530388 | 145532720 | 2333   | 2   | 0.656128  | 0.118478 | 145530166 | 145530611 | 145532494 | 14553294 |
| 273 | NA07029 | [2515685 chr9  | 9  | 310045    | 312573    | 2529   | 61  | 0.548945  | 0.016004 | 309952    | 310139    | 312407    | 312740   |
| 274 | NA07029 | [2515685 chr9  | 9  | 6690711   | 6699868   | 9158   | 8   | -0.563824 | 0.050458 | 6685281   | 6693073   | 6698343   | 670139   |
| 275 | NA07029 | [2515685 chr9  | 9  | 44153357  | 44153558  | 202    | 2   | -0.660775 | 0.099218 | 44153348  | 44153366  | 44153395  | 4415372  |
| 276 | NA07029 | [2515685 chr9  | 9  | 65309543  | 65309744  | 202    | 2   | -0.660773 | 0.099218 | 65309534  | 65309552  | 65309581  | 6530990  |
| 277 | NA07029 | [2515685 chr9  | 9  | 66230851  | 66231052  | 202    | 2   | -0.660775 | 0.099218 | 66230842  | 66230860  | 66230889  | 6623121  |
| 278 | NA07029 | [2515685 chr9  | 9  | 67195876  | 67196883  | 1008   | 2   | 0.510082  | 0.085106 | 67195691  | 67196062  | 67196717  | 6719704  |
| 279 | NA07029 | [2515685 chr9  | 9  | 68200977  | 68201915  | 939    | 2   | 0.736706  | 0.095263 | 68200578  | 68201376  | 68201730  | 6820210  |
| 280 | NA07029 | [2515685 chr9  | 9  | 76785489  | 76787598  | 2110   | 2   | -0.815198 | 0.100667 | 76785038  | 76785941  | 76787269  | 7678792  |
| 281 | NA07029 | [2515685 chr9  | 9  | 81749621  | 81753060  | 3440   | 2   | -0.494357 | 0.090165 | 81749264  | 81749979  | 81750698  | 8175616  |
| 282 | NA07029 | [2515685 chr9  | 9  | 81760964  | 81793706  | 32743  | 48  | -0.467158 | 0.017737 | 81760558  | 81761370  | 81793559  | 8179385  |
| 283 | NA07029 | [2515685 chr9  | 9  | 81832560  | 81840507  | 7948   | 11  | -0.344654 | 0.043656 | 81832083  | 81833037  | 81840112  | 8184090  |
| 284 | NA07029 | [2515685 chr9  | 9  | 101795950 | 101804576 | 8627   | 7   | -0.960707 | 0.063751 | 101795517 | 101796383 | 101803113 | 10180603 |
| 285 | NA07029 | [2515685 chr9  | 9  | 138188003 | 138189923 | 1921   | 45  | 0.521655  | 0.02078  | 138187808 | 138188198 | 138189840 | 13819000 |
| 286 | NA07029 | [2515685 chr9  | 9  | 138295059 | 138303575 | 8517   | 11  | -0.422568 | 0.043441 | 138294774 | 138295345 | 138302275 | 13830487 |
| 287 | NA07029 | [2515685 chr10 | 10 | 170571    | 172369    | 1799   | 2   | 0.553756  | 0.090545 | 170341    | 170801    | 171237    | 173501   |
| 288 | NA07029 | [2515685 chr10 | 10 | 6693908   | 6703893   | 9986   | 8   | 0.821335  | 0.055439 | 6692231   | 6695585   | 6703779   | 670400   |
| 289 | NA07029 | [2515685 chr10 | 10 | 20036833  | 20038315  | 1483   | 2   | -2.172287 | 0.149448 | 20036464  | 20037202  | 20038007  | 2003862  |

|     |         |                |    |           |           |        |      |           |          |           |           |           |           |
|-----|---------|----------------|----|-----------|-----------|--------|------|-----------|----------|-----------|-----------|-----------|-----------|
| 290 | NA07029 | [2515685 chr10 | 10 | 20888200  | 20900113  | 11914  | 9    | -0.811942 | 0.053783 | 20883329  | 20890946  | 20897367  | 20902917  |
| 291 | NA07029 | [2515685 chr10 | 10 | 37486514  | 37529195  | 42682  | 65   | -0.374268 | 0.015482 | 37486043  | 37486985  | 37528890  | 37529500  |
| 292 | NA07029 | [2515685 chr10 | 10 | 42645281  | 42650729  | 5449   | 12   | -0.29633  | 0.040414 | 42644935  | 42645627  | 42650066  | 42651393  |
| 293 | NA07029 | [2515685 chr10 | 10 | 46182371  | 47173707  | 991337 | 1453 | -0.342962 | 0.003478 | 46182194  | 46182549  | 47173507  | 47173907  |
| 294 | NA07029 | [2515685 chr10 | 10 | 47217375  | 47237545  | 20171  | 67   | -0.370724 | 0.015759 | 47217255  | 47217496  | 47237269  | 47237827  |
| 295 | NA07029 | [2515685 chr10 | 10 | 47723236  | 47806251  | 83016  | 230  | -0.32208  | 0.008704 | 47575187  | 47725982  | 47806074  | 47806421  |
| 296 | NA07029 | [2515685 chr10 | 10 | 47877984  | 47895873  | 17890  | 56   | -0.377508 | 0.017086 | 47877760  | 47878209  | 47895597  | 47896143  |
| 297 | NA07029 | [2515685 chr10 | 10 | 48572137  | 48870392  | 298256 | 305  | -0.323724 | 0.007143 | 48571961  | 48572314  | 48870221  | 48870561  |
| 298 | NA07029 | [2515685 chr10 | 10 | 51116619  | 51132551  | 15933  | 22   | -0.315456 | 0.02813  | 51067634  | 51119365  | 51132382  | 51132727  |
| 299 | NA07029 | [2515685 chr10 | 10 | 52136987  | 52143412  | 6426   | 9    | -0.274555 | 0.042459 | 52136355  | 52137619  | 52140666  | 52165941  |
| 300 | NA07029 | [2515685 chr10 | 10 | 55013473  | 55025089  | 11617  | 3    | 0.550868  | 0.09587  | 55011568  | 55015379  | 55024760  | 55025411  |
| 301 | NA07029 | [2515685 chr10 | 10 | 56117212  | 56139275  | 22064  | 20   | -0.896276 | 0.03354  | 56115764  | 56118661  | 56138931  | 56139611  |
| 302 | NA07029 | [2515685 chr10 | 10 | 58173880  | 58177193  | 3314   | 4    | 0.346436  | 0.068478 | 58173632  | 58174128  | 58176981  | 58177401  |
| 303 | NA07029 | [2515685 chr10 | 10 | 81130012  | 81131239  | 1228   | 3    | 0.626605  | 0.072495 | 81129619  | 81130405  | 81131087  | 81131339  |
| 304 | NA07029 | [2515685 chr10 | 10 | 81450211  | 81451438  | 1228   | 3    | 0.626605  | 0.072495 | 81449818  | 81450604  | 81451286  | 81451591  |
| 305 | NA07029 | [2515685 chr10 | 10 | 81587909  | 81589341  | 1433   | 3    | 0.615244  | 0.072286 | 81587312  | 81588507  | 81589190  | 81589493  |
| 306 | NA07029 | [2515685 chr10 | 10 | 84398057  | 84421454  | 23398  | 26   | 0.550922  | 0.030635 | 84396460  | 84399654  | 84421205  | 84421707  |
| 307 | NA07029 | [2515685 chr10 | 10 | 88866216  | 88966295  | 100080 | 111  | -0.341419 | 0.012827 | 88865617  | 88866816  | 88965910  | 88966681  |
| 308 | NA07029 | [2515685 chr10 | 10 | 88972215  | 88973430  | 1216   | 4    | 0.628049  | 0.063137 | 88971824  | 88972607  | 88973280  | 88973587  |
| 309 | NA07029 | [2515685 chr10 | 10 | 89104175  | 89105652  | 1478   | 3    | 0.626591  | 0.072494 | 89103532  | 89104819  | 89105500  | 89105807  |
| 310 | NA07029 | [2515685 chr10 | 10 | 102208209 | 102259466 | 51258  | 54   | 0.496252  | 0.020151 | 102203482 | 102210955 | 102258995 | 10225993  |
| 311 | NA07029 | [2515685 chr10 | 10 | 124336365 | 124341749 | 5385   | 6    | 0.493794  | 0.066577 | 124335581 | 124337149 | 124341238 | 12434226  |
| 312 | NA07029 | [2515685 chr10 | 10 | 124350353 | 124366738 | 16386  | 21   | -0.58124  | 0.026023 | 124350031 | 124350675 | 124366300 | 12436717  |
| 313 | NA07029 | [2515685 chr10 | 10 | 129048824 | 129051127 | 2304   | 2    | -0.725351 | 0.141708 | 129048372 | 129049276 | 129050257 | 12905199  |
| 314 | NA07029 | [2515685 chr10 | 10 | 134168766 | 134170259 | 1494   | 17   | -0.305569 | 0.039842 | 134168524 | 134169008 | 134170097 | 13417042  |
| 315 | NA07029 | [2515685 chr10 | 10 | 134924761 | 134926337 | 1577   | 16   | 0.354053  | 0.042478 | 134924706 | 134924816 | 134926184 | 13492649  |
| 316 | NA07029 | [2515685 chr10 | 10 | 134932085 | 134935385 | 3301   | 4    | 0.451424  | 0.075345 | 134931752 | 134932419 | 134934910 | 13493586  |
| 317 | NA07029 | [2515685 chr10 | 10 | 135365507 | 135367159 | 1653   | 2    | 0.920956  | 0.129354 | 135364999 | 135366016 | 135366656 | 13536766  |
| 318 | NA07029 | [2515685 chr11 | 11 | 969654    | 971069    | 1416   | 2    | 0.974286  | 0.112529 | 969933    | 969976    | 970737    | 971401    |
| 319 | NA07029 | [2515685 chr11 | 11 | 2840307   | 2842410   | 2104   | 3    | 0.814886  | 0.095276 | 2839959   | 2840656   | 2841856   | 2842961   |
| 320 | NA07029 | [2515685 chr11 | 11 | 2999681   | 3174862   | 175182 | 3    | -0.55168  | 0.076368 | 2949255   | 3002762   | 3173264   | 3176467   |
| 321 | NA07029 | [2515685 chr11 | 11 | 3619753   | 3621196   | 1444   | 2    | -0.924193 | 0.122015 | 3619588   | 3619919   | 3620949   | 3621443   |
| 322 | NA07029 | [2515685 chr11 | 11 | 3628748   | 3632795   | 4048   | 6    | -2.449609 | 0.087394 | 3625722   | 3631775   | 3632594   | 3632991   |
| 323 | NA07029 | [2515685 chr11 | 11 | 4924831   | 4933540   | 8710   | 9    | -0.770421 | 0.050581 | 4924403   | 4925260   | 4933251   | 4933831   |
| 324 | NA07029 | [2515685 chr11 | 11 | 5717038   | 5718491   | 1454   | 2    | 3.251304  | 0.211425 | 5716660   | 5717416   | 5718038   | 5718941   |
| 325 | NA07029 | [2515685 chr11 | 11 | 5741269   | 5765993   | 24725  | 33   | 2.072421  | 0.039073 | 5741059   | 5741480   | 5765632   | 5766354   |
| 326 | NA07029 | [2515685 chr11 | 11 | 11831868  | 11833089  | 1222   | 2    | 0.940094  | 0.115616 | 11831412  | 11832324  | 11832853  | 11833321  |
| 327 | NA07029 | [2515685 chr11 | 11 | 18906905  | 18928671  | 21767  | 30   | 0.686633  | 0.027776 | 18906533  | 18907278  | 18928457  | 18928881  |
| 328 | NA07029 | [2515685 chr11 | 11 | 48284073  | 48284771  | 699    | 2    | 0.994404  | 0.104982 | 48283862  | 48284285  | 48284572  | 48284971  |
| 329 | NA07029 | [2515685 chr11 | 11 | 49665830  | 49715829  | 50000  | 36   | 0.484956  | 0.02465  | 49665251  | 49666410  | 49712748  | 49721983  |
| 330 | NA07029 | [2515685 chr11 | 11 | 73812690  | 73818580  | 5891   | 4    | -0.458688 | 0.077726 | 73812400  | 73812981  | 73818213  | 73818943  |
| 331 | NA07029 | [2515685 chr11 | 11 | 81179059  | 81197695  | 18637  | 15   | -0.698669 | 0.040268 | 81178883  | 81179236  | 81194614  | 81202141  |
| 332 | NA07029 | [2515685 chr11 | 11 | 88254238  | 88303948  | 49711  | 44   | 0.270911  | 0.022494 | 88254017  | 88254459  | 88303762  | 88304131  |
| 333 | NA07029 | [2515685 chr11 | 11 | 106744846 | 106751052 | 6207   | 9    | -0.745828 | 0.055659 | 106744561 | 106745131 | 106747971 | 106754831 |
| 334 | NA07029 | [2515685 chr11 | 11 | 134107699 | 134112290 | 4592   | 5    | 0.715025  | 0.06981  | 134106591 | 134108808 | 134111845 | 134112731 |
| 335 | NA07029 | [2515685 chr12 | 12 | 736840    | 744802    | 7963   | 9    | 0.910469  | 0.0496   | 736616    | 737064    | 744211    | 745394    |
| 336 | NA07029 | [2515685 chr12 | 12 | 2112534   | 2127044   | 14511  | 15   | 0.643463  | 0.038462 | 2109107   | 2115961   | 2126809   | 2127275   |
| 337 | NA07029 | [2515685 chr12 | 12 | 6113530   | 6117052   | 3523   | 3    | 0.524587  | 0.090929 | 6111640   | 6115421   | 6116289   | 6117811   |
| 338 | NA07029 | [2515685 chr12 | 12 | 7846762   | 7847901   | 1140   | 2    | 0.730715  | 0.101564 | 7846594   | 7846930   | 7847677   | 7848121   |
| 339 | NA07029 | [2515685 chr12 | 12 | 8263675   | 8269259   | 5585   | 16   | 0.405741  | 0.033281 | 8263598   | 8263752   | 8268864   | 8269654   |
| 340 | NA07029 | [2515685 chr12 | 12 | 11038220  | 11039650  | 1431   | 3    | 0.416963  | 0.079367 | 11037861  | 11038580  | 11039445  | 11039851  |
| 341 | NA07029 | [2515685 chr12 | 12 | 11070849  | 11083764  | 12916  | 19   | -0.497028 | 0.033962 | 11069857  | 11071841  | 11083559  | 11083961  |
| 342 | NA07029 | [2515685 chr12 | 12 | 11109398  | 11142012  | 32615  | 40   | -0.801316 | 0.024744 | 11109206  | 11109590  | 11141608  | 11142417  |
| 343 | NA07029 | [2515685 chr12 | 12 | 11398049  | 11463223  | 65175  | 66   | -0.28293  | 0.018004 | 11397507  | 11398591  | 11459990  | 11466457  |
| 344 | NA07029 | [2515685 chr12 | 12 | 12605956  | 12607299  | 1344   | 2    | 0.726304  | 0.135903 | 12605559  | 12606353  | 12606864  | 12607734  |

|     |         |                |    |           |           |        |     |           |          |           |           |           |          |
|-----|---------|----------------|----|-----------|-----------|--------|-----|-----------|----------|-----------|-----------|-----------|----------|
| 345 | NA07029 | [2515685 chr12 | 12 | 31869223  | 31874787  | 5565   | 2   | 0.7453    | 0.095351 | 31864235  | 31872714  | 31872796  | 3187677! |
| 346 | NA07029 | [2515685 chr12 | 12 | 33785283  | 33791667  | 6385   | 2   | 0.700232  | 0.114817 | 33781521  | 33788774  | 33791366  | 3379196! |
| 347 | NA07029 | [2515685 chr12 | 12 | 69156921  | 69167887  | 10967  | 11  | 0.756034  | 0.047508 | 69138649  | 69160412  | 69164396  | 6921501! |
| 348 | NA07029 | [2515685 chr12 | 12 | 78656134  | 78665261  | 9128   | 9   | 0.45918   | 0.05003  | 78654687  | 78657582  | 78664736  | 7866578! |
| 349 | NA07029 | [2515685 chr12 | 12 | 128864324 | 128869047 | 4724   | 14  | -0.280195 | 0.03048  | 128863938 | 128864711 | 128867605 | 12887048 |
| 350 | NA07029 | [2515685 chr12 | 12 | 129401626 | 129403321 | 1696   | 2   | 0.481489  | 0.089876 | 129401288 | 129401965 | 129403022 | 12940362 |
| 351 | NA07029 | [2515685 chr12 | 12 | 130315291 | 130316795 | 1505   | 12  | 0.351164  | 0.034834 | 130315089 | 130315493 | 130316384 | 13031720 |
| 352 | NA07029 | [2515685 chr12 | 12 | 131046250 | 131046750 | 501    | 2   | 0.666758  | 0.115387 | 131046129 | 131046371 | 131046551 | 13104694 |
| 353 | NA07029 | [2515685 chr13 | 13 | 25947233  | 25950398  | 3166   | 3   | 3.197825  | 0.151105 | 25946194  | 25948272  | 25949415  | 2595138! |
| 354 | NA07029 | [2515685 chr13 | 13 | 33029574  | 33043421  | 13848  | 9   | 0.783518  | 0.055954 | 33000262  | 33034253  | 33042925  | 3304391! |
| 355 | NA07029 | [2515685 chr13 | 13 | 56611711  | 56645734  | 34024  | 47  | -0.339199 | 0.016635 | 56610946  | 56612477  | 56645321  | 5664614! |
| 356 | NA07029 | [2515685 chr13 | 13 | 69633905  | 69673289  | 39385  | 42  | 0.870246  | 0.024458 | 69633412  | 69634399  | 69672985  | 6967359! |
| 357 | NA07029 | [2515685 chr13 | 13 | 71375850  | 71378291  | 2442   | 2   | -3.31535  | 0.254016 | 71374967  | 71376734  | 71377584  | 7137899! |
| 358 | NA07029 | [2515685 chr13 | 13 | 103789222 | 103790362 | 1141   | 2   | -0.670203 | 0.117844 | 103788903 | 103789541 | 103790218 | 10379050 |
| 359 | NA07029 | [2515685 chr13 | 13 | 109215660 | 109217089 | 1430   | 5   | -0.441998 | 0.059389 | 109215230 | 109216090 | 109216885 | 10921729 |
| 360 | NA07029 | [2515685 chr13 | 13 | 110502383 | 110503129 | 747    | 3   | -0.890246 | 0.098602 | 110502225 | 110502541 | 110502890 | 11050336 |
| 361 | NA07029 | [2515685 chr13 | 13 | 113079647 | 113086817 | 7171   | 3   | 0.635118  | 0.084703 | 113078890 | 113080404 | 113082138 | 11309434 |
| 362 | NA07029 | [2515685 chr14 | 14 | 18533593  | 18541076  | 7484   | 4   | -0.41216  | 0.073356 | 18532349  | 18534837  | 18540534  | 1854161! |
| 363 | NA07029 | [2515685 chr14 | 14 | 19265232  | 19494842  | 229611 | 212 | -0.372854 | 0.010109 | 19261661  | 19268804  | 19494444  | 1949524! |
| 364 | NA07029 | [2515685 chr14 | 14 | 26904080  | 27124134  | 220055 | 3   | 0.390163  | 0.072919 | 26810831  | 26908840  | 27123302  | 2712496! |
| 365 | NA07029 | [2515685 chr14 | 14 | 42059344  | 42062997  | 3654   | 2   | 0.824628  | 0.112373 | 42056485  | 42062203  | 42062601  | 4206339! |
| 366 | NA07029 | [2515685 chr14 | 14 | 53780053  | 53783579  | 3527   | 6   | -0.778045 | 0.068698 | 53779833  | 53780274  | 53783238  | 5378392! |
| 367 | NA07029 | [2515685 chr14 | 14 | 69086774  | 69092832  | 6059   | 6   | -0.886571 | 0.058205 | 69086153  | 69087395  | 69092239  | 6909342! |
| 368 | NA07029 | [2515685 chr14 | 14 | 73052083  | 73053781  | 1699   | 2   | -0.45145  | 0.083763 | 73051714  | 73052452  | 73052927  | 7305463! |
| 369 | NA07029 | [2515685 chr14 | 14 | 73070288  | 73084642  | 14355  | 16  | -0.466834 | 0.041595 | 73068747  | 73071829  | 73083193  | 7308609! |
| 370 | NA07029 | [2515685 chr14 | 14 | 73106064  | 73117243  | 11180  | 11  | 0.293323  | 0.045385 | 73105752  | 73106376  | 73116211  | 7311827! |
| 371 | NA07029 | [2515685 chr15 | 15 | 18437301  | 18438714  | 1414   | 2   | -1.453254 | 0.111651 | 18436702  | 18437900  | 18438383  | 1843904! |
| 372 | NA07029 | [2515685 chr15 | 15 | 18439288  | 18458940  | 19653  | 19  | -0.250356 | 0.034869 | 18439045  | 18439532  | 18458212  | 1845966! |
| 373 | NA07029 | [2515685 chr15 | 15 | 18982454  | 18982857  | 404    | 2   | -0.520224 | 0.081914 | 18982356  | 18982552  | 18982746  | 1898296! |
| 374 | NA07029 | [2515685 chr15 | 15 | 19090947  | 19293921  | 202975 | 263 | 0.306497  | 0.006574 | 19090386  | 19091509  | 19293604  | 1929423! |
| 375 | NA07029 | [2515685 chr15 | 15 | 19300507  | 19476573  | 176067 | 205 | 0.306497  | 0.006574 | 19298205  | 19305017  | 19476331  | 1947681! |
| 376 | NA07029 | [2515685 chr15 | 15 | 19538254  | 19548332  | 10079  | 12  | 0.295231  | 0.037845 | 19537046  | 19539462  | 19547623  | 1954904! |
| 377 | NA07029 | [2515685 chr15 | 15 | 19662452  | 19797016  | 134565 | 42  | 0.343887  | 0.020293 | 19662119  | 19662785  | 19796797  | 1979723! |
| 378 | NA07029 | [2515685 chr15 | 15 | 19838440  | 19844122  | 5683   | 9   | -0.68221  | 0.052836 | 19836986  | 19839894  | 19843950  | 1984429! |
| 379 | NA07029 | [2515685 chr15 | 15 | 19844483  | 19845597  | 1115   | 2   | -0.714816 | 0.108915 | 19844295  | 19844671  | 19845254  | 1984594! |
| 380 | NA07029 | [2515685 chr15 | 15 | 19960987  | 19963910  | 2924   | 4   | -0.612786 | 0.081116 | 19960606  | 19961369  | 19963782  | 1996403! |
| 381 | NA07029 | [2515685 chr15 | 15 | 20229743  | 20234328  | 4586   | 11  | 0.575019  | 0.041823 | 20229703  | 20229783  | 20233781  | 2023487! |
| 382 | NA07029 | [2515685 chr15 | 15 | 20371610  | 20385913  | 14304  | 19  | -0.273847 | 0.031446 | 20367922  | 20373912  | 20385577  | 2038625! |
| 383 | NA07029 | [2515685 chr15 | 15 | 20475783  | 20477325  | 1543   | 2   | -0.456808 | 0.089461 | 20475140  | 20476426  | 20477073  | 2047757! |
| 384 | NA07029 | [2515685 chr15 | 15 | 20940676  | 20940987  | 312    | 2   | -0.520224 | 0.081914 | 20940578  | 20940774  | 20940968  | 2094100! |
| 385 | NA07029 | [2515685 chr15 | 15 | 21049779  | 21068071  | 18293  | 18  | 0.274217  | 0.030457 | 21049217  | 21050342  | 21065769  | 2111638! |
| 386 | NA07029 | [2515685 chr15 | 15 | 21228375  | 21228686  | 312    | 2   | -0.520224 | 0.081914 | 21228277  | 21228473  | 21228667  | 2122870! |
| 387 | NA07029 | [2515685 chr15 | 15 | 21606753  | 21614600  | 7848   | 7   | 0.915722  | 0.064217 | 21606459  | 21607047  | 21612298  | 2163669! |
| 388 | NA07029 | [2515685 chr15 | 15 | 22240140  | 22245365  | 5226   | 9   | 0.346913  | 0.050688 | 22238835  | 22241445  | 22244636  | 2224609! |
| 389 | NA07029 | [2515685 chr15 | 15 | 22270650  | 22278459  | 7810   | 11  | -0.262011 | 0.043119 | 22270434  | 22270866  | 22278179  | 2227874! |
| 390 | NA07029 | [2515685 chr15 | 15 | 24986053  | 24992250  | 6198   | 7   | 0.877262  | 0.062384 | 24985426  | 24986680  | 24991680  | 2499282! |
| 391 | NA07029 | [2515685 chr15 | 15 | 26251915  | 26252414  | 500    | 2   | -0.520224 | 0.081914 | 26251815  | 26252015  | 26252209  | 2625262! |
| 392 | NA07029 | [2515685 chr15 | 15 | 26331811  | 26343818  | 12008  | 25  | 0.577332  | 0.027685 | 26331265  | 26332358  | 26342288  | 2634534! |
| 393 | NA07029 | [2515685 chr15 | 15 | 26538169  | 26542764  | 4596   | 11  | 0.59155   | 0.039733 | 26538129  | 26538209  | 26542214  | 2654331! |
| 394 | NA07029 | [2515685 chr15 | 15 | 26622234  | 26622638  | 405    | 2   | -0.520224 | 0.081914 | 26622123  | 26622345  | 26622539  | 2662273! |
| 395 | NA07029 | [2515685 chr15 | 15 | 26875842  | 26877026  | 1185   | 2   | 1.167135  | 0.124229 | 26875299  | 26876385  | 26876824  | 2687722! |
| 396 | NA07029 | [2515685 chr15 | 15 | 28122918  | 28124033  | 1116   | 2   | 0.587055  | 0.117138 | 28122573  | 28123264  | 28123750  | 2812431! |
| 397 | NA07029 | [2515685 chr15 | 15 | 32515477  | 32592025  | 76549  | 64  | 0.565522  | 0.019515 | 32514954  | 32516000  | 32591791  | 3259226! |
| 398 | NA07029 | [2515685 chr15 | 15 | 41775760  | 41777132  | 1373   | 2   | -0.604025 | 0.114397 | 41775441  | 41776080  | 41776863  | 4177740! |
| 399 | NA07029 | [2515685 chr15 | 15 | 74671388  | 74682820  | 11433  | 9   | 1.010493  | 0.055465 | 74671122  | 74671654  | 74680518  | 7468951! |

|     |         |                |    |           |           |        |     |           |          |           |           |           |           |
|-----|---------|----------------|----|-----------|-----------|--------|-----|-----------|----------|-----------|-----------|-----------|-----------|
| 400 | NA07029 | [2515685 chr15 | 15 | 75117585  | 75119946  | 2362   | 4   | -1.630594 | 0.101964 | 75117343  | 75117827  | 75119741  | 7512015:  |
| 401 | NA07029 | [2515685 chr15 | 15 | 80588100  | 80588985  | 886    | 2   | -1.164488 | 0.086282 | 80587699  | 80588502  | 80588602  | 8058936:  |
| 402 | NA07029 | [2515685 chr15 | 15 | 80982676  | 80983561  | 886    | 2   | -1.164497 | 0.086283 | 80982275  | 80983078  | 80983178  | 8098394:  |
| 403 | NA07029 | [2515685 chr15 | 15 | 82333041  | 82335194  | 2154   | 2   | -0.674801 | 0.104586 | 82332284  | 82333799  | 82334729  | 8233566:  |
| 404 | NA07029 | [2515685 chr15 | 15 | 83581911  | 83582575  | 665    | 2   | -1.164497 | 0.086283 | 83581731  | 83582092  | 83582192  | 8358295:  |
| 405 | NA07029 | [2515685 chr15 | 15 | 95613871  | 95635465  | 21595  | 10  | -0.812657 | 0.048847 | 95609763  | 95616173  | 95633163  | 9565465:  |
| 406 | NA07029 | [2515685 chr15 | 15 | 100109640 | 100122682 | 13043  | 98  | 0.691799  | 0.012028 | 100108905 | 100110376 | 100122315 | 10012305: |
| 407 | NA07029 | [2515685 chr15 | 15 | 100264033 | 100309150 | 45118  | 18  | 0.387169  | 0.034111 | 100263857 | 100264210 | 100307499 | 10031080: |
| 408 | NA07029 | [2515685 chr16 | 16 | 131844    | 136972    | 5129   | 4   | 0.404501  | 0.074991 | 131416    | 132273    | 135407    | 138537    |
| 409 | NA07029 | [2515685 chr16 | 16 | 669910    | 671309    | 1400   | 2   | 0.790617  | 0.120359 | 669664    | 670156    | 670956    | 671665    |
| 410 | NA07029 | [2515685 chr16 | 16 | 5287117   | 5290633   | 3517   | 2   | 1.664867  | 0.140567 | 5286149   | 5288085   | 5288751   | 529327:   |
| 411 | NA07029 | [2515685 chr16 | 16 | 16633469  | 16639120  | 5652   | 4   | 0.540968  | 0.074038 | 16632502  | 16634437  | 16638386  | 1663985:  |
| 412 | NA07029 | [2515685 chr16 | 16 | 21475160  | 21502620  | 27461  | 20  | 0.352243  | 0.031896 | 21474882  | 21475438  | 21501101  | 2150414:  |
| 413 | NA07029 | [2515685 chr16 | 16 | 22521651  | 22618743  | 97093  | 84  | 0.332474  | 0.015871 | 22521425  | 22521878  | 22617181  | 2262030:  |
| 414 | NA07029 | [2515685 chr16 | 16 | 28324617  | 28335549  | 10933  | 10  | 0.274449  | 0.046509 | 28324569  | 28324665  | 28334190  | 2833690:  |
| 415 | NA07029 | [2515685 chr16 | 16 | 28622218  | 28628077  | 5860   | 4   | 0.424438  | 0.07367  | 28620341  | 28624095  | 28627777  | 2862837:  |
| 416 | NA07029 | [2515685 chr16 | 16 | 30239265  | 30240317  | 1053   | 2   | -0.547024 | 0.09305  | 30239046  | 30239484  | 30240061  | 3024057:  |
| 417 | NA07029 | [2515685 chr16 | 16 | 31869470  | 31989695  | 120226 | 197 | -0.281311 | 0.009766 | 31869136  | 31869805  | 31987813  | 3199924:  |
| 418 | NA07029 | [2515685 chr16 | 16 | 32106365  | 32106660  | 296    | 2   | 1.13132   | 0.121943 | 32106136  | 32106595  | 32106634  | 3210668:  |
| 419 | NA07029 | [2515685 chr16 | 16 | 32159898  | 32160377  | 480    | 2   | -2.140533 | 0.125458 | 32159453  | 32160343  | 32160346  | 3216040:  |
| 420 | NA07029 | [2515685 chr16 | 16 | 32203463  | 32219640  | 16178  | 30  | -0.363962 | 0.023098 | 32200681  | 32205345  | 32219531  | 3221974:  |
| 421 | NA07029 | [2515685 chr16 | 16 | 32479455  | 32560619  | 81165  | 86  | -0.342185 | 0.015956 | 32470048  | 32481337  | 32559391  | 3256184:  |
| 422 | NA07029 | [2515685 chr16 | 16 | 32606692  | 32607163  | 472    | 2   | -2.140533 | 0.125458 | 32606661  | 32606724  | 32606727  | 3260759:  |
| 423 | NA07029 | [2515685 chr16 | 16 | 32660409  | 32660703  | 295    | 2   | 1.131319  | 0.121943 | 32660384  | 32660435  | 32660474  | 3266093:  |
| 424 | NA07029 | [2515685 chr16 | 16 | 32765698  | 32932957  | 167260 | 254 | -0.291705 | 0.008754 | 32765344  | 32766052  | 32931075  | 3294249:  |
| 425 | NA07029 | [2515685 chr16 | 16 | 33047346  | 33047640  | 295    | 2   | 1.131319  | 0.121943 | 33047117  | 33047575  | 33047614  | 3304766:  |
| 426 | NA07029 | [2515685 chr16 | 16 | 33100875  | 33101346  | 472    | 2   | -2.140472 | 0.125456 | 33100438  | 33101312  | 33101315  | 3310137:  |
| 427 | NA07029 | [2515685 chr16 | 16 | 33157406  | 33157879  | 474    | 2   | -2.140503 | 0.125457 | 33156967  | 33157845  | 33157848  | 3315791:  |
| 428 | NA07029 | [2515685 chr16 | 16 | 33201517  | 33217055  | 15539  | 28  | -0.361779 | 0.024086 | 33197841  | 33203399  | 33216946  | 3321716:  |
| 429 | NA07029 | [2515685 chr16 | 16 | 33392689  | 33398916  | 6228   | 12  | -0.351551 | 0.040809 | 33392062  | 33393316  | 33398608  | 3339922:  |
| 430 | NA07029 | [2515685 chr16 | 16 | 33476904  | 33478338  | 1435   | 2   | -0.670261 | 0.118261 | 33476264  | 33477545  | 33478077  | 3347860:  |
| 431 | NA07029 | [2515685 chr16 | 16 | 33502420  | 33724596  | 222177 | 309 | -0.303336 | 0.00806  | 33502141  | 33502700  | 33724257  | 3372493:  |
| 432 | NA07029 | [2515685 chr16 | 16 | 33863080  | 33875988  | 12909  | 11  | 0.301111  | 0.045146 | 33860552  | 33864962  | 33874106  | 3403120:  |
| 433 | NA07029 | [2515685 chr16 | 16 | 34324091  | 34609075  | 284985 | 322 | -0.473941 | 0.008279 | 34323706  | 34324477  | 34607193  | 3461732:  |
| 434 | NA07029 | [2515685 chr16 | 16 | 57204541  | 57207585  | 3045   | 3   | 4.576658  | 0.193347 | 57204170  | 57204913  | 57206938  | 5720823:  |
| 435 | NA07029 | [2515685 chr16 | 16 | 57231525  | 57234603  | 3079   | 2   | -0.56872  | 0.094097 | 57230452  | 57232599  | 57233543  | 5723566:  |
| 436 | NA07029 | [2515685 chr16 | 16 | 79534561  | 79540634  | 6074   | 8   | -0.679464 | 0.055059 | 79532411  | 79536443  | 79540299  | 7954097:  |
| 437 | NA07029 | [2515685 chr16 | 16 | 83994929  | 84004171  | 9243   | 81  | 0.33089   | 0.014157 | 83994558  | 83995300  | 84003767  | 8400457:  |
| 438 | NA07029 | [2515685 chr16 | 16 | 85087756  | 85089036  | 1281   | 2   | 0.987615  | 0.116275 | 85087427  | 85088085  | 85088690  | 8508938:  |
| 439 | NA07029 | [2515685 chr16 | 16 | 86669849  | 86672366  | 2518   | 2   | -3.022903 | 0.163308 | 86669288  | 86670411  | 86671217  | 8667351:  |
| 440 | NA07029 | [2515685 chr16 | 16 | 88181036  | 88182713  | 1678   | 2   | 0.894022  | 0.10845  | 88180612  | 88181461  | 88182173  | 8818325:  |
| 441 | NA07029 | [2515685 chr17 | 17 | 911980    | 915554    | 3575   | 4   | 0.775643  | 0.07687  | 911452    | 912508    | 915413    | 915696    |
| 442 | NA07029 | [2515685 chr17 | 17 | 966845    | 969578    | 2734   | 21  | 0.898628  | 0.036331 | 966537    | 967154    | 969378    | 969775    |
| 443 | NA07029 | [2515685 chr17 | 17 | 18299050  | 18327737  | 28688  | 39  | -0.3792   | 0.023332 | 18298294  | 18299807  | 18327321  | 1832815:  |
| 444 | NA07029 | [2515685 chr17 | 17 | 18331739  | 18332345  | 607    | 2   | -1.298716 | 0.109023 | 18331509  | 18331970  | 18331978  | 1833271:  |
| 445 | NA07029 | [2515685 chr17 | 17 | 20286517  | 20338871  | 52355  | 84  | -0.320428 | 0.01565  | 20286294  | 20286740  | 20338701  | 2033904:  |
| 446 | NA07029 | [2515685 chr17 | 17 | 21826349  | 21834752  | 8404   | 7   | 0.257689  | 0.046807 | 21826238  | 21826461  | 21833710  | 2183579:  |
| 447 | NA07029 | [2515685 chr17 | 17 | 21942843  | 21954909  | 12067  | 20  | -0.314268 | 0.031681 | 21942618  | 21943068  | 21954628  | 2195519:  |
| 448 | NA07029 | [2515685 chr17 | 17 | 31514581  | 31523655  | 9075   | 29  | -0.332504 | 0.023699 | 31514267  | 31514895  | 31523372  | 3152393:  |
| 449 | NA07029 | [2515685 chr17 | 17 | 31602423  | 31611752  | 9330   | 32  | -0.324148 | 0.022493 | 31602327  | 31602520  | 31611416  | 3161208:  |
| 450 | NA07029 | [2515685 chr17 | 17 | 31811051  | 31826712  | 15662  | 45  | -0.310464 | 0.018815 | 31810898  | 31811205  | 31826429  | 3182699:  |
| 451 | NA07029 | [2515685 chr17 | 17 | 31838190  | 31877763  | 39574  | 60  | -0.327634 | 0.016514 | 31837915  | 31838466  | 31877480  | 3187804:  |
| 452 | NA07029 | [2515685 chr17 | 17 | 32829500  | 32833231  | 3732   | 5   | -2.293226 | 0.114214 | 32828825  | 32830175  | 32832670  | 3283379:  |
| 453 | NA07029 | [2515685 chr17 | 17 | 33324385  | 33661121  | 336737 | 448 | -0.264776 | 0.006211 | 33323841  | 33324930  | 33660590  | 3366165:  |
| 454 | NA07029 | [2515685 chr17 | 17 | 36675530  | 36685343  | 9814   | 10  | -0.757043 | 0.049661 | 36675011  | 36676049  | 36684647  | 3668604:  |



|     |         |                |    |          |          |         |      |           |          |          |          |          |          |
|-----|---------|----------------|----|----------|----------|---------|------|-----------|----------|----------|----------|----------|----------|
| 455 | NA07029 | [2515685 chr17 | 17 | 41035524 | 41036525 | 1002    | 2    | 0.836217  | 0.101141 | 41035120 | 41035928 | 41035967 | 4103708- |
| 456 | NA07029 | [2515685 chr17 | 17 | 41675037 | 41676708 | 1672    | 2    | 0.836216  | 0.101141 | 41673805 | 41676270 | 41676309 | 4167710- |
| 457 | NA07029 | [2515685 chr17 | 17 | 41779931 | 41921615 | 141685  | 134  | 0.312051  | 0.010538 | 41779457 | 41780406 | 41920590 | 4192264- |
| 458 | NA07029 | [2515685 chr17 | 17 | 41964733 | 41986331 | 21599   | 26   | 0.263328  | 0.024779 | 41964517 | 41964949 | 41986039 | 4198662- |
| 459 | NA07029 | [2515685 chr17 | 17 | 41997426 | 42134816 | 137391  | 125  | 0.310353  | 0.010865 | 41996952 | 41997901 | 42134422 | 4213521- |
| 460 | NA07029 | [2515685 chr17 | 17 | 42467216 | 42485231 | 18016   | 22   | 0.250588  | 0.027104 | 42467194 | 42467238 | 42485154 | 4248530- |
| 461 | NA07029 | [2515685 chr17 | 17 | 42905976 | 42908985 | 3010    | 2    | 0.93913   | 0.125574 | 42905585 | 42906368 | 42906957 | 4291101- |
| 462 | NA07029 | [2515685 chr17 | 17 | 55434888 | 55454279 | 19392   | 36   | -0.25731  | 0.0223   | 55434445 | 55435332 | 55454017 | 5545454- |
| 463 | NA07029 | [2515685 chr17 | 17 | 72766794 | 72769899 | 3106    | 5    | 0.517702  | 0.069422 | 72766351 | 72767238 | 72769595 | 7277020- |
| 464 | NA07029 | [2515685 chr18 | 18 | 14726980 | 14733704 | 6725    | 9    | -0.36252  | 0.048335 | 14726667 | 14727294 | 14733077 | 1473433- |
| 465 | NA07029 | [2515685 chr18 | 18 | 36514289 | 36521090 | 6802    | 6    | -0.763927 | 0.062951 | 36513759 | 36514820 | 36520512 | 3652166- |
| 466 | NA07029 | [2515685 chr18 | 18 | 42797012 | 42808028 | 11017   | 16   | -0.27526  | 0.032657 | 42796537 | 42797488 | 42807691 | 4280836- |
| 467 | NA07029 | [2515685 chr18 | 18 | 61874791 | 61883105 | 8315    | 9    | -0.837624 | 0.052135 | 61874483 | 61875100 | 61882738 | 6188347- |
| 468 | NA07029 | [2515685 chr18 | 18 | 61917747 | 61920171 | 2425    | 4    | 3.311212  | 0.14191  | 61917522 | 61917973 | 61919646 | 6192069- |
| 469 | NA07029 | [2515685 chr18 | 18 | 62026554 | 62029990 | 3437    | 2    | 0.620825  | 0.120323 | 62025633 | 62027475 | 62029130 | 6203085- |
| 470 | NA07029 | [2515685 chr18 | 18 | 64896052 | 64907736 | 11685   | 13   | -0.741419 | 0.044305 | 64894789 | 64897315 | 64907228 | 6490824- |
| 471 | NA07029 | [2515685 chr18 | 18 | 74373005 | 74379534 | 6530    | 10   | 0.583223  | 0.040136 | 74372064 | 74373947 | 74378860 | 7438020- |
| 472 | NA07029 | [2515685 chr18 | 18 | 74392800 | 74398225 | 5426    | 4    | 0.748775  | 0.076138 | 74390826 | 74394774 | 74397790 | 7439866- |
| 473 | NA07029 | [2515685 chr19 | 19 | 32148    | 79514    | 47367   | 23   | 0.394452  | 0.029652 | 30498    | 33798    | 79338    | 7969C    |
| 474 | NA07029 | [2515685 chr19 | 19 | 310414   | 314479   | 4066    | 15   | -0.634645 | 0.03771  | 309687   | 311142   | 312994   | 315964   |
| 475 | NA07029 | [2515685 chr19 | 19 | 331568   | 333129   | 1562    | 2    | 1.332227  | 0.109142 | 331314   | 331822   | 332310   | 333948   |
| 476 | NA07029 | [2515685 chr19 | 19 | 23007903 | 23013841 | 5939    | 6    | 0.857039  | 0.068859 | 22990964 | 23010431 | 23013525 | 2301415- |
| 477 | NA07029 | [2515685 chr19 | 19 | 23108259 | 23109446 | 1188    | 2    | 0.981906  | 0.115923 | 23107903 | 23108615 | 23108879 | 2311001- |
| 478 | NA07029 | [2515685 chr19 | 19 | 23257205 | 23258538 | 1334    | 2    | -0.826339 | 0.120672 | 23256882 | 23257529 | 23258213 | 2325886- |
| 479 | NA07029 | [2515685 chr19 | 19 | 23685380 | 23687053 | 1674    | 2    | -0.822326 | 0.126741 | 23685163 | 23685598 | 23686210 | 2368789- |
| 480 | NA07029 | [2515685 chr19 | 19 | 39419837 | 39421349 | 1513    | 3    | 0.574169  | 0.09544  | 39419616 | 39420059 | 39421018 | 3942168- |
| 481 | NA07029 | [2515685 chr19 | 19 | 43974792 | 43977294 | 2503    | 2    | -0.717395 | 0.099684 | 43974369 | 43975216 | 43975620 | 4397896- |
| 482 | NA07029 | [2515685 chr19 | 19 | 45412775 | 45413556 | 782     | 2    | -0.641175 | 0.101017 | 45412566 | 45412985 | 45413285 | 4541382- |
| 483 | NA07029 | [2515685 chr19 | 19 | 53100142 | 53151974 | 51833   | 98   | -0.441899 | 0.012021 | 53098980 | 53101305 | 53151638 | 5315231- |
| 484 | NA07029 | [2515685 chr19 | 19 | 55285877 | 55336157 | 50281   | 104  | -0.429012 | 0.011591 | 55285730 | 55286025 | 55335244 | 5533707- |
| 485 | NA07029 | [2515685 chr19 | 19 | 56824422 | 56843325 | 18904   | 22   | -0.52563  | 0.030831 | 56824136 | 56824709 | 56842321 | 5684432- |
| 486 | NA07029 | [2515685 chr19 | 19 | 58209430 | 58245460 | 36031   | 28   | -0.707629 | 0.028175 | 58208997 | 58209863 | 58245024 | 5824589- |
| 487 | NA07029 | [2515685 chr19 | 19 | 59492384 | 59493822 | 1439    | 2    | 0.534128  | 0.105491 | 59491977 | 59492791 | 59493600 | 5949404- |
| 488 | NA07029 | [2515685 chr19 | 19 | 60148727 | 60152395 | 3669    | 2    | -0.56669  | 0.107876 | 60146836 | 60150619 | 60152066 | 6015272- |
| 489 | NA07029 | [2515685 chr20 | 20 | 1511097  | 1532477  | 21381   | 26   | 0.80822   | 0.031321 | 1510534  | 1511660  | 1532182  | 1532773- |
| 490 | NA07029 | [2515685 chr20 | 20 | 15249645 | 15251805 | 2161    | 2    | -3.972686 | 0.202808 | 15249381 | 15249909 | 15251287 | 1525232- |
| 491 | NA07029 | [2515685 chr20 | 20 | 26136252 | 26139530 | 3279    | 5    | 0.533664  | 0.072652 | 26135878 | 26136626 | 26139184 | 2613987- |
| 492 | NA07029 | [2515685 chr20 | 20 | 55717505 | 55719029 | 1525    | 2    | 0.482801  | 0.087826 | 55717058 | 55717952 | 55718431 | 5571962- |
| 493 | NA07029 | [2515685 chr20 | 20 | 59951513 | 59957050 | 5538    | 18   | 1.142821  | 0.035801 | 59950681 | 59952345 | 59956538 | 5995756- |
| 494 | NA07029 | [2515685 chr20 | 20 | 61770772 | 61775011 | 4240    | 15   | 0.271653  | 0.039172 | 61770072 | 61771473 | 61774460 | 6177556- |
| 495 | NA07029 | [2515685 chr20 | 20 | 62066380 | 62068214 | 1835    | 8    | 0.968501  | 0.049816 | 62066146 | 62066615 | 62067671 | 6206875- |
| 496 | NA07029 | [2515685 chr20 | 20 | 62113559 | 62114878 | 1320    | 18   | 0.319107  | 0.03679  | 62113491 | 62113628 | 62114687 | 6211507- |
| 497 | NA07029 | [2515685 chr20 | 20 | 62233505 | 62235897 | 2393    | 4    | 0.531857  | 0.057745 | 62232847 | 62234163 | 62235101 | 6223669- |
| 498 | NA07029 | [2515685 chr20 | 20 | 62419814 | 62429848 | 10035   | 10   | -0.264277 | 0.047021 | 62419562 | 62420067 | 62429329 | 6243036- |
| 499 | NA07029 | [2515685 chr22 | 22 | 17032140 | 19761755 | 2729616 | 1457 | -0.25325  | 0.003004 | 17031480 | 17032801 | 19761413 | 1976209- |
| 500 | NA07029 | [2515685 chr22 | 22 | 19786578 | 20243640 | 457063  | 684  | -0.25325  | 0.003004 | 19786233 | 19786924 | 20240961 | 2030228- |
| 501 | NA07029 | [2515685 chr22 | 22 | 22672624 | 22674936 | 2313    | 4    | 1.190163  | 0.085556 | 22672391 | 22672858 | 22674426 | 2267544- |
| 502 | NA07029 | [2515685 chr22 | 22 | 22677557 | 22683930 | 6374    | 3    | 0.481983  | 0.085255 | 22677005 | 22678110 | 22681309 | 2268655- |
| 503 | NA07029 | [2515685 chr22 | 22 | 22683930 | 22688523 | 4594    | 3    | -0.650339 | 0.097694 | 22681309 | 22686552 | 22687378 | 2268966- |
| 504 | NA07029 | [2515685 chr22 | 22 | 22690382 | 22691501 | 1120    | 2    | 1.757857  | 0.118481 | 22690146 | 22690619 | 22691088 | 2269191- |
| 505 | NA07029 | [2515685 chr22 | 22 | 22695407 | 22720154 | 24748   | 27   | 0.933329  | 0.034942 | 22695112 | 22695703 | 22719882 | 2272042- |
| 506 | NA07029 | [2515685 chr22 | 22 | 22899677 | 22906905 | 7229    | 11   | -0.257253 | 0.040101 | 22899141 | 22900214 | 22906573 | 2290723- |
| 507 | NA07029 | [2515685 chr22 | 22 | 22960929 | 22969591 | 8663    | 9    | -0.31609  | 0.050181 | 22957880 | 22963608 | 22969352 | 2296983- |
| 508 | NA07029 | [2515685 chr22 | 22 | 33619409 | 33623490 | 4082    | 5    | 0.79119   | 0.064646 | 33618939 | 33619879 | 33622642 | 3362433- |
| 509 | NA07029 | [2515685 chr22 | 22 | 37617530 | 37624010 | 6481    | 8    | -2.801011 | 0.092549 | 37616333 | 37618728 | 37621331 | 3762705- |

|     |         |               |    |           |           |        |     |           |          |           |           |           |           |
|-----|---------|---------------|----|-----------|-----------|--------|-----|-----------|----------|-----------|-----------|-----------|-----------|
| 510 | NA07029 | [2515685 chrX | 23 | 655376    | 657388    | 2013   | 4   | -0.50669  | 0.080029 | 655166    | 655586    | 656091    | 658686    |
| 511 | NA07029 | [2515685 chrX | 23 | 1979893   | 1983878   | 3986   | 14  | 0.315661  | 0.035882 | 1979654   | 1980133   | 1982685   | 1985072   |
| 512 | NA07029 | [2515685 chrX | 23 | 2286200   | 2288297   | 2098   | 2   | 0.579394  | 0.085456 | 2285671   | 2286730   | 2287550   | 2289045   |
| 513 | NA07029 | [2515685 chrX | 23 | 56677475  | 56678614  | 1140   | 2   | 0.457093  | 0.080641 | 56677130  | 56677820  | 56678344  | 56678884  |
| 514 | NA07029 | [2515685 chrX | 23 | 56680842  | 56689418  | 8577   | 20  | 0.366632  | 0.025879 | 56680601  | 56681084  | 56689148  | 56689681  |
| 515 | NA07029 | [2515685 chrX | 23 | 70741274  | 70745998  | 4725   | 38  | 0.387171  | 0.025727 | 70739871  | 70742677  | 70744597  | 70747401  |
| 516 | NA07029 | [2515685 chrX | 23 | 105355082 | 105360133 | 5052   | 17  | 0.419449  | 0.057567 | 105352123 | 105358042 | 105359168 | 105361094 |
| 517 | NA07029 | [2515685 chrX | 23 | 114782515 | 114821026 | 38512  | 81  | -0.263295 | 0.014106 | 114781834 | 114783196 | 114817056 | 114836071 |
| 518 | NA07029 | [2515685 chrX | 23 | 115117756 | 115118275 | 520    | 2   | 0.836513  | 0.157886 | 115117633 | 115117880 | 115118167 | 115118378 |
| 519 | NA07029 | [2515685 chrX | 23 | 115170476 | 115171520 | 1045   | 2   | 0.552414  | 0.106582 | 115170396 | 115170556 | 115170717 | 115172321 |
| 520 | NA07029 | [2515685 chrX | 23 | 134291129 | 134297901 | 6773   | 8   | -0.254638 | 0.047698 | 134290012 | 134292246 | 134297409 | 134298394 |
| 521 | NA07029 | [2515685 chrX | 23 | 134569408 | 134625407 | 56000  | 104 | 0.333067  | 0.008433 | 134569294 | 134569522 | 134624877 | 134625931 |
| 522 | NA07029 | [2515685 chrX | 23 | 134645810 | 134656753 | 10944  | 11  | 0.333067  | 0.008433 | 134645280 | 134646341 | 134656598 | 134656903 |
| 523 | NA07029 | [2515685 chrX | 23 | 134658452 | 134698023 | 39572  | 89  | 0.333067  | 0.008433 | 134658325 | 134658579 | 134696803 | 134699241 |
| 524 | NA07029 | [2515685 chrX | 23 | 134754378 | 134755274 | 897    | 2   | 0.563774  | 0.084634 | 134753922 | 134754834 | 134755112 | 134755543 |
| 525 | NA07029 | [2515685 chrX | 23 | 139811649 | 139822026 | 10378  | 17  | 0.351295  | 0.01928  | 139811533 | 139811766 | 139821839 | 139822211 |
| 526 | NA07029 | [2515685 chrX | 23 | 139823654 | 139834051 | 10398  | 16  | 0.351295  | 0.01928  | 139823538 | 139823771 | 139830081 | 139842271 |
| 527 | NA07029 | [2515685 chrX | 23 | 140051445 | 140057577 | 6133   | 9   | 0.500998  | 0.040544 | 140043259 | 140055415 | 140057511 | 140057641 |
| 528 | NA07029 | [2515685 chrX | 23 | 140244231 | 140245198 | 968    | 2   | -1.110859 | 0.14205  | 140243934 | 140244529 | 140244899 | 140245494 |
| 529 | NA07029 | [2515685 chrX | 23 | 140386672 | 140413881 | 27210  | 48  | 0.291979  | 0.017526 | 140378397 | 140390642 | 140411067 | 140416694 |
| 530 | NA07029 | [2515685 chrX | 23 | 140500458 | 140510358 | 9901   | 14  | 0.416534  | 0.033154 | 140492162 | 140504428 | 140510308 | 140510404 |
| 531 | NA07029 | [2515685 chrX | 23 | 146117285 | 146118393 | 1109   | 2   | 0.664757  | 0.132355 | 146117087 | 146117483 | 146118136 | 146118651 |
| 532 | NA07029 | [2515685 chrY | 24 | 655376    | 657388    | 2013   | 4   | -0.50669  | 0.080029 | 655166    | 655586    | 656091    | 658686    |
| 533 | NA07029 | [2515685 chrY | 24 | 1979893   | 1983878   | 3986   | 14  | 0.315661  | 0.035882 | 1979654   | 1980133   | 1982685   | 1985072   |
| 534 | NA07029 | [2515685 chrY | 24 | 2286200   | 2288297   | 2098   | 2   | 0.579394  | 0.085456 | 2285671   | 2286730   | 2287550   | 2289045   |
| 535 | NA07029 | [2515685 chrY | 24 | 9188837   | 9206566   | 17730  | 55  | 0.302608  | 0.019172 | 9188753   | 9188922   | 9206485   | 9206648   |
| 536 | NA07029 | [2515685 chrY | 24 | 21993689  | 22051534  | 57846  | 191 | 0.32771   | 0.008585 | 21993662  | 21993716  | 22050614  | 22052451  |
| 537 | NA07029 | [2515685 chrY | 24 | 22362148  | 22400461  | 38314  | 127 | 0.345395  | 0.010404 | 22361228  | 22363068  | 22400431  | 22400491  |
| 538 | NA07029 | [2515685 chrY | 24 | 22650628  | 22665789  | 15162  | 53  | 0.378964  | 0.0165   | 22649721  | 22651535  | 22665407  | 22666171  |
| 539 | NA07029 | [2515685 chrY | 24 | 22797835  | 22798350  | 516    | 2   | 0.424983  | 0.080641 | 22797713  | 22797957  | 22797960  | 22798741  |
| 540 | NA07029 | [2515685 chrY | 24 | 22889169  | 22904311  | 15143  | 52  | 0.38267   | 0.016711 | 22888787  | 22889551  | 22903429  | 22905194  |
| 541 | NA07029 | [2515685 chrY | 24 | 23628713  | 23649003  | 20291  | 38  | -0.498096 | 0.020685 | 23628548  | 23628879  | 23648757  | 23649241  |
| 542 | NA07029 | [2515685 chrY | 24 | 23716390  | 23748616  | 32227  | 65  | -0.500632 | 0.015688 | 23716144  | 23716636  | 23748451  | 23748781  |
| 543 | NA07029 | [2515685 chrY | 24 | 25258650  | 25285076  | 26427  | 53  | -0.282579 | 0.009101 | 25258209  | 25259092  | 25284830  | 25285321  |
| 544 | NA07029 | [2515685 chrY | 24 | 25341625  | 25379999  | 38375  | 84  | -0.282579 | 0.009101 | 25341379  | 25341871  | 25379558  | 25380441  |
| 1   | NA18980 | [2515685 chr1 | 1  | 76985     | 80231     | 3247   | 5   | 0.392683  | 0.071396 | 76641     | 77329     | 79974     | 80489     |
| 2   | NA18980 | [2515685 chr1 | 1  | 606129    | 612159    | 6031   | 5   | -0.605319 | 0.07153  | 605901    | 606358    | 610122    | 614196    |
| 3   | NA18980 | [2515685 chr1 | 1  | 10416438  | 10418311  | 1874   | 2   | -0.700366 | 0.115772 | 10415863  | 10417014  | 10417712  | 10418911  |
| 4   | NA18980 | [2515685 chr1 | 1  | 12828197  | 12855019  | 26823  | 45  | 0.257355  | 0.023813 | 12827875  | 12828520  | 12854828  | 12855211  |
| 5   | NA18980 | [2515685 chr1 | 1  | 12884744  | 12886858  | 2115   | 3   | 0.521343  | 0.092172 | 12884434  | 12885054  | 12886536  | 12887181  |
| 6   | NA18980 | [2515685 chr1 | 1  | 12926542  | 12926956  | 415    | 2   | -0.576378 | 0.114133 | 12926307  | 12926778  | 12926804  | 12927101  |
| 7   | NA18980 | [2515685 chr1 | 1  | 13159940  | 13162071  | 2132   | 3   | 0.537205  | 0.092172 | 13159618  | 13160263  | 13161777  | 13162361  |
| 8   | NA18980 | [2515685 chr1 | 1  | 13359970  | 13374371  | 14402  | 20  | 0.257769  | 0.035698 | 13359952  | 13359989  | 13374331  | 13374441  |
| 9   | NA18980 | [2515685 chr1 | 1  | 13380737  | 13382868  | 2132   | 3   | 0.537205  | 0.092172 | 13380415  | 13381060  | 13382574  | 13383161  |
| 10  | NA18980 | [2515685 chr1 | 1  | 16823179  | 16873177  | 49999  | 67  | -0.39345  | 0.019514 | 16822798  | 16823561  | 16869908  | 16922321  |
| 11  | NA18980 | [2515685 chr1 | 1  | 25330950  | 25409301  | 78352  | 77  | 0.360483  | 0.018309 | 25330662  | 25331238  | 25408840  | 25409761  |
| 12  | NA18980 | [2515685 chr1 | 1  | 72478372  | 72524180  | 45809  | 36  | -2.150539 | 0.043048 | 72478140  | 72478604  | 72523661  | 72524701  |
| 13  | NA18980 | [2515685 chr1 | 1  | 89188117  | 89190762  | 2646   | 5   | 1.738058  | 0.099277 | 89187764  | 89188470  | 89190458  | 89191061  |
| 14  | NA18980 | [2515685 chr1 | 1  | 103827497 | 103838007 | 10511  | 20  | 0.259898  | 0.036152 | 103827175 | 103827820 | 103837663 | 103838351 |
| 15  | NA18980 | [2515685 chr1 | 1  | 103848296 | 103857352 | 9057   | 15  | 0.435887  | 0.009798 | 103842566 | 103851565 | 103857039 | 103857661 |
| 16  | NA18980 | [2515685 chr1 | 1  | 103874084 | 104015739 | 141656 | 228 | 0.435887  | 0.009798 | 103873944 | 103874224 | 104013178 | 104018301 |
| 17  | NA18980 | [2515685 chr1 | 1  | 105728161 | 105735462 | 7302   | 8   | -0.939198 | 0.063734 | 105727820 | 105728503 | 105734532 | 105736391 |
| 18  | NA18980 | [2515685 chr1 | 1  | 108444641 | 108449550 | 4910   | 9   | 0.737137  | 0.0549   | 108443817 | 108445466 | 108449224 | 108449871 |
| 19  | NA18980 | [2515685 chr1 | 1  | 109934024 | 109965726 | 31703  | 35  | 0.488317  | 0.027542 | 109933789 | 109934260 | 109965065 | 109966381 |
| 20  | NA18980 | [2515685 chr1 | 1  | 112405902 | 112416691 | 10790  | 9   | 0.689102  | 0.05414  | 112405415 | 112406389 | 112416423 | 112416961 |

|            |               |   |           |           |        |     |           |          |           |           |           |          |
|------------|---------------|---|-----------|-----------|--------|-----|-----------|----------|-----------|-----------|-----------|----------|
| 21 NA18980 | [2515685 chr1 | 1 | 120242939 | 120342422 | 99484  | 152 | 0.267744  | 0.012966 | 120242617 | 120243262 | 120342303 | 12034254 |
| 22 NA18980 | [2515685 chr1 | 1 | 120524033 | 120524155 | 123    | 2   | -0.730801 | 0.112888 | 120523991 | 120524075 | 120524093 | 12052421 |
| 23 NA18980 | [2515685 chr1 | 1 | 141396026 | 141396142 | 117    | 2   | -0.730797 | 0.112887 | 141395971 | 141396082 | 141396101 | 14139618 |
| 24 NA18980 | [2515685 chr1 | 1 | 141964844 | 141981850 | 17007  | 50  | 0.361424  | 0.022577 | 141964740 | 141964948 | 141978581 | 14203010 |
| 25 NA18980 | [2515685 chr1 | 1 | 142438646 | 142569435 | 130790 | 159 | 0.318731  | 0.012667 | 142438189 | 142439104 | 142568775 | 14257009 |
| 26 NA18980 | [2515685 chr1 | 1 | 142678703 | 142758443 | 79741  | 133 | 0.254825  | 0.012538 | 142678583 | 142678823 | 142757786 | 14275910 |
| 27 NA18980 | [2515685 chr1 | 1 | 142761925 | 142777852 | 15928  | 25  | 0.254825  | 0.012538 | 142761553 | 142762297 | 142776895 | 14277880 |
| 28 NA18980 | [2515685 chr1 | 1 | 145099555 | 145108479 | 8925   | 30  | 0.43822   | 0.029147 | 145099433 | 145099678 | 145108263 | 14510869 |
| 29 NA18980 | [2515685 chr1 | 1 | 145383992 | 145400647 | 16656  | 40  | 0.334773  | 0.025264 | 145383814 | 145384171 | 145400362 | 14540093 |
| 30 NA18980 | [2515685 chr1 | 1 | 145546022 | 145562677 | 16656  | 39  | 0.342412  | 0.025586 | 145545844 | 145546201 | 145562394 | 14556296 |
| 31 NA18980 | [2515685 chr1 | 1 | 146326656 | 146344860 | 18205  | 56  | 0.351251  | 0.021347 | 146326478 | 146326834 | 146343057 | 14634666 |
| 32 NA18980 | [2515685 chr1 | 1 | 146808546 | 146809451 | 906    | 2   | -0.689387 | 0.118261 | 146808090 | 146809003 | 146809142 | 14680976 |
| 33 NA18980 | [2515685 chr1 | 1 | 149368571 | 149399435 | 30865  | 22  | 0.797742  | 0.035063 | 149368105 | 149369038 | 149399080 | 14939979 |
| 34 NA18980 | [2515685 chr1 | 1 | 149573821 | 149583431 | 9611   | 5   | 0.867567  | 0.074608 | 149573460 | 149574182 | 149582912 | 14958395 |
| 35 NA18980 | [2515685 chr1 | 1 | 158297085 | 158299984 | 2900   | 2   | -0.709516 | 0.113901 | 158296609 | 158297561 | 158298974 | 15830099 |
| 36 NA18980 | [2515685 chr1 | 1 | 171528686 | 171533429 | 4744   | 5   | -0.88613  | 0.074051 | 171528423 | 171528950 | 171533245 | 17153361 |
| 37 NA18980 | [2515685 chr1 | 1 | 193448393 | 193554182 | 105790 | 89  | 0.406258  | 0.017582 | 193448156 | 193448631 | 193553474 | 19355489 |
| 38 NA18980 | [2515685 chr1 | 1 | 209044276 | 209046404 | 2129   | 2   | -0.771205 | 0.116735 | 209044030 | 209044522 | 209045656 | 20904715 |
| 39 NA18980 | [2515685 chr1 | 1 | 226117234 | 226125722 | 8489   | 2   | -1.51304  | 0.130727 | 226114786 | 226119683 | 226122453 | 22612975 |
| 40 NA18980 | [2515685 chr1 | 1 | 231219104 | 231265212 | 46109  | 51  | -0.395315 | 0.022393 | 231218806 | 231219402 | 231264613 | 23126581 |
| 41 NA18980 | [2515685 chr1 | 1 | 236719047 | 236720539 | 1493   | 2   | -1.115974 | 0.121028 | 236718751 | 236719344 | 236719891 | 23672118 |
| 42 NA18980 | [2515685 chr1 | 1 | 239368545 | 239481883 | 113339 | 13  | -0.498034 | 0.045008 | 239368239 | 239368851 | 239478614 | 23949135 |
| 43 NA18980 | [2515685 chr2 | 2 | 388500    | 390704    | 2205   | 6   | 0.496157  | 0.065468 | 387915    | 389086    | 390173    | 391236   |
| 44 NA18980 | [2515685 chr2 | 2 | 13444451  | 13511508  | 67058  | 60  | -0.354177 | 0.017153 | 13444264  | 13444639  | 13510995  | 1351202  |
| 45 NA18980 | [2515685 chr2 | 2 | 13533588  | 13548616  | 15029  | 16  | -0.354177 | 0.017153 | 13532866  | 13534310  | 13548319  | 1354891  |
| 46 NA18980 | [2515685 chr2 | 2 | 34606445  | 34644764  | 38320  | 39  | 0.762851  | 0.026942 | 34601818  | 34609397  | 34641812  | 3464839  |
| 47 NA18980 | [2515685 chr2 | 2 | 35896478  | 35905931  | 9454   | 3   | -0.961463 | 0.096132 | 35879425  | 35899430  | 35902979  | 3590982  |
| 48 NA18980 | [2515685 chr2 | 2 | 44378111  | 44380701  | 2591   | 4   | -0.724287 | 0.092989 | 44377587  | 44378636  | 44379703  | 4438169  |
| 49 NA18980 | [2515685 chr2 | 2 | 56563625  | 56567381  | 3757   | 2   | 2.851482  | 0.203529 | 56556559  | 56566577  | 56567035  | 5656772  |
| 50 NA18980 | [2515685 chr2 | 2 | 87471837  | 87478765  | 6929   | 10  | 0.267052  | 0.050486 | 87471614  | 87472060  | 87478435  | 8747909  |
| 51 NA18980 | [2515685 chr2 | 2 | 88117636  | 88126839  | 9204   | 15  | 0.261591  | 0.041344 | 88116083  | 88119190  | 88126458  | 8812722  |
| 52 NA18980 | [2515685 chr2 | 2 | 95952154  | 95980016  | 27863  | 7   | -0.306914 | 0.060409 | 95946033  | 95955106  | 95977064  | 9600130  |
| 53 NA18980 | [2515685 chr2 | 2 | 97184386  | 97189734  | 5349   | 2   | -0.631434 | 0.114549 | 97182781  | 97185992  | 97186782  | 9719672  |
| 54 NA18980 | [2515685 chr2 | 2 | 97281294  | 97329019  | 47726  | 51  | -0.28097  | 0.022483 | 97281091  | 97281497  | 97328936  | 9732910  |
| 55 NA18980 | [2515685 chr2 | 2 | 97603656  | 97609880  | 6225   | 5   | -0.439662 | 0.071504 | 97600155  | 97606608  | 97609220  | 9761054  |
| 56 NA18980 | [2515685 chr2 | 2 | 108313968 | 108314875 | 908    | 2   | 0.585785  | 0.114662 | 108313664 | 108314272 | 108314680 | 10831507 |
| 57 NA18980 | [2515685 chr2 | 2 | 108576721 | 108584820 | 8100   | 12  | -0.26096  | 0.046086 | 108576377 | 108577066 | 108584667 | 10858497 |
| 58 NA18980 | [2515685 chr2 | 2 | 111696774 | 111699147 | 2374   | 16  | 0.644901  | 0.039904 | 111696413 | 111697136 | 111698899 | 11169939 |
| 59 NA18980 | [2515685 chr2 | 2 | 126159437 | 126168349 | 8913   | 3   | -2.606937 | 0.129437 | 126158494 | 126160381 | 126168048 | 12616865 |
| 60 NA18980 | [2515685 chr2 | 2 | 129354604 | 129360182 | 5579   | 4   | -0.952267 | 0.085607 | 129354317 | 129354892 | 129357659 | 12936270 |
| 61 NA18980 | [2515685 chr2 | 2 | 129748437 | 129754490 | 6054   | 9   | -0.358294 | 0.054391 | 129747893 | 129748981 | 129754058 | 12975492 |
| 62 NA18980 | [2515685 chr2 | 2 | 130405520 | 130406599 | 1080   | 2   | -0.71981  | 0.112887 | 130405172 | 130405869 | 130406246 | 13040695 |
| 63 NA18980 | [2515685 chr2 | 2 | 130420955 | 130451276 | 30322  | 28  | -0.391666 | 0.030532 | 130420630 | 130421281 | 130450996 | 13045155 |
| 64 NA18980 | [2515685 chr2 | 2 | 130457728 | 130464577 | 6850   | 9   | -0.520499 | 0.055352 | 130457383 | 130458074 | 130464333 | 13046482 |
| 65 NA18980 | [2515685 chr2 | 2 | 130482410 | 130483330 | 921    | 2   | -0.747294 | 0.112887 | 130482368 | 130482453 | 130483142 | 13048351 |
| 66 NA18980 | [2515685 chr2 | 2 | 130551722 | 130559081 | 7360   | 13  | -0.427237 | 0.044338 | 130551682 | 130551762 | 130558687 | 13055947 |
| 67 NA18980 | [2515685 chr2 | 2 | 130588400 | 130593482 | 5083   | 10  | -0.471909 | 0.050577 | 130588395 | 130588406 | 130593434 | 13059353 |
| 68 NA18980 | [2515685 chr2 | 2 | 130885569 | 130897796 | 12228  | 18  | -0.337177 | 0.037683 | 130885118 | 130886020 | 130897715 | 13089787 |
| 69 NA18980 | [2515685 chr2 | 2 | 130921410 | 130982789 | 61380  | 129 | -0.263025 | 0.014072 | 130918946 | 130923875 | 130982243 | 13098333 |
| 70 NA18980 | [2515685 chr2 | 2 | 131237169 | 131265300 | 28132  | 61  | -0.291574 | 0.020486 | 131236965 | 131237373 | 131262836 | 13126776 |
| 71 NA18980 | [2515685 chr2 | 2 | 131288823 | 131301010 | 12188  | 18  | -0.350112 | 0.037683 | 131288742 | 131288905 | 131300558 | 13130146 |
| 72 NA18980 | [2515685 chr2 | 2 | 131765082 | 131953962 | 188881 | 314 | -0.259616 | 0.00904  | 131749458 | 131768034 | 131953571 | 13195435 |
| 73 NA18980 | [2515685 chr2 | 2 | 132142907 | 132346526 | 203620 | 231 | -0.369918 | 0.010578 | 132141027 | 132144787 | 132344315 | 13234873 |
| 74 NA18980 | [2515685 chr2 | 2 | 132846945 | 132868801 | 21857  | 13  | 0.502656  | 0.044338 | 132846760 | 132847131 | 132868624 | 13286897 |
| 75 NA18980 | [2515685 chr2 | 2 | 146694146 | 146710744 | 16599  | 17  | -2.04317  | 0.062344 | 146688620 | 146697098 | 146710557 | 14671093 |

|             |               |   |           |           |       |    |           |          |           |           |           |          |
|-------------|---------------|---|-----------|-----------|-------|----|-----------|----------|-----------|-----------|-----------|----------|
| 76 NA18980  | [2515685 chr2 | 2 | 153495551 | 153499409 | 3859  | 2  | 0.838338  | 0.119118 | 153484545 | 153498503 | 153498846 | 15349997 |
| 77 NA18980  | [2515685 chr2 | 2 | 153622711 | 153625256 | 2546  | 3  | 0.966183  | 0.095676 | 153621175 | 153624247 | 153625088 | 15362542 |
| 78 NA18980  | [2515685 chr2 | 2 | 183585233 | 183587271 | 2039  | 2  | -0.610496 | 0.116556 | 183584983 | 183585483 | 183586527 | 18358801 |
| 79 NA18980  | [2515685 chr2 | 2 | 208176479 | 208184457 | 7979  | 7  | 0.908248  | 0.061559 | 208176093 | 208176865 | 208183930 | 20818498 |
| 80 NA18980  | [2515685 chr2 | 2 | 232512469 | 232537143 | 24675 | 6  | -0.488482 | 0.065246 | 232511142 | 232513796 | 232534243 | 23254004 |
| 81 NA18980  | [2515685 chr2 | 2 | 234741925 | 234743945 | 2021  | 3  | -0.470999 | 0.092171 | 234741698 | 234742152 | 234743507 | 23474438 |
| 82 NA18980  | [2515685 chr2 | 2 | 241268490 | 241279127 | 10638 | 7  | 0.329309  | 0.060341 | 241265266 | 241271442 | 241278762 | 24127949 |
| 83 NA18980  | [2515685 chr2 | 2 | 242664580 | 242668683 | 4104  | 10 | 1.360447  | 0.051573 | 242664284 | 242664877 | 242668532 | 24266883 |
| 84 NA18980  | [2515685 chr3 | 3 | 149944    | 157210    | 7267  | 9  | -0.357046 | 0.053249 | 148712    | 151176    | 156642    | 157775   |
| 85 NA18980  | [2515685 chr3 | 3 | 1282960   | 1284261   | 1302  | 2  | -0.629485 | 0.120548 | 1282730   | 1283190   | 1283881   | 1284647  |
| 86 NA18980  | [2515685 chr3 | 3 | 1757211   | 1765702   | 8492  | 2  | 0.949764  | 0.123968 | 1756096   | 1758327   | 1762058   | 179730   |
| 87 NA18980  | [2515685 chr3 | 3 | 50888459  | 50888513  | 55    | 2  | 1.012518  | 0.117669 | 50888445  | 50888474  | 50888495  | 5088853  |
| 88 NA18980  | [2515685 chr3 | 3 | 68821474  | 68831013  | 9540  | 17 | -1.849778 | 0.055967 | 68818894  | 68824055  | 68830417  | 6883160  |
| 89 NA18980  | [2515685 chr3 | 3 | 75841830  | 75879749  | 37920 | 21 | 0.305623  | 0.034837 | 75836910  | 75845474  | 75876105  | 75891771 |
| 90 NA18980  | [2515685 chr3 | 3 | 105862214 | 105867499 | 5286  | 7  | -0.325898 | 0.064044 | 105861916 | 105862513 | 105866395 | 10586860 |
| 91 NA18980  | [2515685 chr3 | 3 | 141750174 | 141752798 | 2625  | 4  | -0.521823 | 0.085626 | 141749720 | 141750628 | 141752415 | 14175318 |
| 92 NA18980  | [2515685 chr3 | 3 | 145871543 | 145874980 | 3438  | 3  | -0.489138 | 0.092172 | 145871243 | 145871843 | 145874619 | 14587534 |
| 93 NA18980  | [2515685 chr3 | 3 | 163994592 | 164008330 | 13739 | 17 | 2.024808  | 0.027364 | 163993392 | 163995793 | 164008010 | 16400865 |
| 94 NA18980  | [2515685 chr3 | 3 | 164031299 | 164106273 | 74975 | 72 | 2.024808  | 0.027364 | 164027655 | 164036948 | 164106029 | 16410651 |
| 95 NA18980  | [2515685 chr3 | 3 | 164200660 | 164205886 | 5227  | 5  | -0.798499 | 0.079233 | 164200187 | 164201133 | 164204674 | 16420709 |
| 96 NA18980  | [2515685 chr3 | 3 | 165326111 | 165327434 | 1324  | 2  | 0.591041  | 0.112902 | 165325444 | 165326778 | 165327134 | 16532773 |
| 97 NA18980  | [2515685 chr3 | 3 | 176561952 | 176567506 | 5555  | 5  | -0.812083 | 0.077128 | 176560250 | 176563654 | 176565991 | 17656902 |
| 98 NA18980  | [2515685 chr3 | 3 | 192547312 | 192554331 | 7020  | 10 | 0.883235  | 0.052679 | 192546950 | 192547674 | 192554127 | 19255453 |
| 99 NA18980  | [2515685 chr3 | 3 | 196879796 | 196966359 | 86564 | 94 | -0.390392 | 0.016551 | 196879715 | 196879878 | 196966111 | 19696660 |
| 100 NA18980 | [2515685 chr3 | 3 | 196994475 | 197002965 | 8491  | 10 | 0.860349  | 0.051667 | 196994054 | 196994896 | 197002044 | 19700388 |
| 101 NA18980 | [2515685 chr3 | 3 | 198247617 | 198250211 | 2595  | 5  | 0.381975  | 0.071543 | 198247165 | 198248070 | 198249700 | 19825045 |
| 102 NA18980 | [2515685 chr3 | 3 | 198422794 | 198427408 | 4615  | 2  | 0.940826  | 0.128266 | 198422381 | 198423207 | 198423959 | 19843085 |
| 103 NA18980 | [2515685 chr3 | 3 | 198650942 | 198653980 | 3039  | 14 | 0.269142  | 0.042703 | 198650630 | 198651255 | 198653743 | 19865421 |
| 104 NA18980 | [2515685 chr3 | 3 | 199218619 | 199221999 | 3381  | 12 | -0.315758 | 0.046086 | 199218354 | 199218884 | 199220440 | 19922355 |
| 105 NA18980 | [2515685 chr3 | 3 | 199313925 | 199321063 | 7139  | 15 | 2.205497  | 0.046281 | 199313515 | 199314336 | 199320844 | 19932128 |
| 106 NA18980 | [2515685 chr3 | 3 | 199383185 | 199387297 | 4113  | 6  | 0.331669  | 0.065175 | 199382863 | 199383507 | 199384743 | 19938985 |
| 107 NA18980 | [2515685 chr4 | 4 | 4346153   | 4346956   | 804   | 2  | -0.600016 | 0.112887 | 4345855   | 4346451   | 4346475   | 434743   |
| 108 NA18980 | [2515685 chr4 | 4 | 4406661   | 4412040   | 5380  | 9  | 0.288778  | 0.053215 | 4406192   | 4407130   | 4411322   | 441275   |
| 109 NA18980 | [2515685 chr4 | 4 | 8739800   | 8756949   | 17150 | 26 | 0.318085  | 0.03131  | 8739551   | 8740049   | 8756813   | 875708   |
| 110 NA18980 | [2515685 chr4 | 4 | 8998178   | 9046719   | 48542 | 87 | 0.678643  | 0.017239 | 8850774   | 9001243   | 9046129   | 904730   |
| 111 NA18980 | [2515685 chr4 | 4 | 9299470   | 9308037   | 8568  | 6  | -0.553649 | 0.066229 | 9295439   | 9302535   | 9306599   | 930947   |
| 112 NA18980 | [2515685 chr4 | 4 | 9812346   | 9813399   | 1054  | 33 | 0.620299  | 0.027791 | 9812284   | 9812408   | 9812952   | 9813847  |
| 113 NA18980 | [2515685 chr4 | 4 | 9887220   | 9911397   | 24178 | 31 | 1.786285  | 0.041622 | 9886886   | 9887555   | 9910388   | 9912407  |
| 114 NA18980 | [2515685 chr4 | 4 | 28906466  | 28917971  | 11506 | 7  | -0.319773 | 0.060592 | 28906020  | 28906912  | 28917730  | 2891821  |
| 115 NA18980 | [2515685 chr4 | 4 | 34602797  | 34650994  | 48198 | 44 | 0.742308  | 0.025526 | 34601994  | 34603600  | 34649535  | 3465245  |
| 116 NA18980 | [2515685 chr4 | 4 | 40484653  | 40497989  | 13337 | 14 | -0.661615 | 0.043637 | 40483204  | 40486103  | 40497266  | 4049871  |
| 117 NA18980 | [2515685 chr4 | 4 | 40597636  | 40685487  | 87852 | 3  | 0.476155  | 0.092362 | 40595822  | 40599451  | 40682422  | 4077803  |
| 118 NA18980 | [2515685 chr4 | 4 | 49045764  | 49055772  | 10009 | 20 | -0.296774 | 0.035698 | 49045571  | 49045958  | 49055565  | 4905598  |
| 119 NA18980 | [2515685 chr4 | 4 | 63500375  | 63504889  | 4515  | 5  | -1.008332 | 0.084033 | 63494261  | 63503440  | 63504639  | 6350514  |
| 120 NA18980 | [2515685 chr4 | 4 | 70033393  | 70035747  | 2355  | 2  | -0.596573 | 0.114909 | 70032990  | 70033796  | 70034733  | 7003676  |
| 121 NA18980 | [2515685 chr4 | 4 | 70089182  | 70090545  | 1364  | 3  | -0.576822 | 0.113449 | 70089010  | 70089355  | 70090263  | 7009082  |
| 122 NA18980 | [2515685 chr4 | 4 | 70306339  | 70309023  | 2685  | 7  | 0.334035  | 0.060434 | 70306109  | 70306570  | 70308580  | 7030946  |
| 123 NA18980 | [2515685 chr4 | 4 | 70329154  | 70416062  | 86909 | 85 | 0.385229  | 0.018231 | 70328934  | 70329375  | 70415760  | 7041636  |
| 124 NA18980 | [2515685 chr4 | 4 | 92343585  | 92348473  | 4889  | 8  | -0.313584 | 0.061331 | 92343246  | 92343924  | 92348276  | 9234867  |
| 125 NA18980 | [2515685 chr4 | 4 | 92414911  | 92418111  | 3201  | 2  | -0.599895 | 0.115879 | 92414657  | 92415166  | 92417718  | 9241850  |
| 126 NA18980 | [2515685 chr4 | 4 | 115865203 | 115869480 | 4278  | 3  | -0.817903 | 0.095717 | 115864913 | 115865494 | 115866415 | 11587556 |
| 127 NA18980 | [2515685 chr4 | 4 | 119512941 | 119515902 | 2962  | 3  | -0.49145  | 0.095273 | 119512552 | 119513331 | 119515514 | 11951629 |
| 128 NA18980 | [2515685 chr4 | 4 | 124835704 | 124837199 | 1496  | 3  | -0.822608 | 0.099733 | 124835418 | 124835991 | 124836924 | 12483747 |
| 129 NA18980 | [2515685 chr4 | 4 | 132574972 | 132576910 | 1939  | 3  | -0.90167  | 0.094916 | 132574614 | 132575330 | 132576502 | 13257731 |
| 130 NA18980 | [2515685 chr4 | 4 | 133536193 | 133540723 | 4531  | 3  | -0.73738  | 0.099666 | 133531398 | 133539258 | 133540462 | 13354098 |

|             |               |   |           |           |        |     |           |          |           |           |           |          |
|-------------|---------------|---|-----------|-----------|--------|-----|-----------|----------|-----------|-----------|-----------|----------|
| 131 NA18980 | [2515685 chr4 | 4 | 138537751 | 138549906 | 12156  | 14  | 0.850214  | 0.048179 | 138537443 | 138538059 | 138547414 | 13855239 |
| 132 NA18980 | [2515685 chr4 | 4 | 145142974 | 145152116 | 9143   | 11  | -0.264803 | 0.049933 | 145142629 | 145143319 | 145151901 | 14515233 |
| 133 NA18980 | [2515685 chr4 | 4 | 145241837 | 145244071 | 2235   | 2   | -0.782818 | 0.14042  | 145241488 | 145242187 | 145242951 | 14524519 |
| 134 NA18980 | [2515685 chr4 | 4 | 162237272 | 162242562 | 5291   | 8   | 0.927417  | 0.059816 | 162236487 | 162238058 | 162242381 | 16224274 |
| 135 NA18980 | [2515685 chr4 | 4 | 162579232 | 162583343 | 4112   | 3   | -0.470075 | 0.092426 | 162578850 | 162579615 | 162581827 | 16258485 |
| 136 NA18980 | [2515685 chr4 | 4 | 162806038 | 162809269 | 3232   | 3   | -1.984569 | 0.129563 | 162804872 | 162807204 | 162808734 | 16280980 |
| 137 NA18980 | [2515685 chr4 | 4 | 169183401 | 169368370 | 184970 | 163 | 0.755768  | 0.013137 | 169182712 | 169184090 | 169366713 | 16937002 |
| 138 NA18980 | [2515685 chr4 | 4 | 172750241 | 172755216 | 4976   | 2   | -3.801663 | 0.315827 | 172748887 | 172751596 | 172753256 | 17275717 |
| 139 NA18980 | [2515685 chr4 | 4 | 173799832 | 173807320 | 7489   | 6   | -2.638934 | 0.129985 | 173799464 | 173800201 | 173804255 | 17381134 |
| 140 NA18980 | [2515685 chr4 | 4 | 185533276 | 185544849 | 11574  | 12  | 0.879529  | 0.048362 | 185532696 | 185533857 | 185543276 | 18554642 |
| 141 NA18980 | [2515685 chr4 | 4 | 186816666 | 186818678 | 2013   | 3   | 4.683213  | 0.23015  | 186816420 | 186816912 | 186818307 | 18681904 |
| 142 NA18980 | [2515685 chr4 | 4 | 187728494 | 187732907 | 4414   | 15  | 2.488084  | 0.057183 | 187728193 | 187728795 | 187732541 | 18773327 |
| 143 NA18980 | [2515685 chr4 | 4 | 188255523 | 188269680 | 14158  | 235 | 0.990932  | 0.010624 | 188255215 | 188255831 | 188269403 | 18826995 |
| 144 NA18980 | [2515685 chr4 | 4 | 189799455 | 189805517 | 6063   | 9   | 0.334597  | 0.053215 | 189799180 | 189799730 | 189805016 | 18980601 |
| 145 NA18980 | [2515685 chr4 | 4 | 189812041 | 189814133 | 2093   | 2   | -0.880587 | 0.124677 | 189811777 | 189812306 | 189813742 | 18981452 |
| 146 NA18980 | [2515685 chr4 | 4 | 190528602 | 190533163 | 4562   | 21  | -0.337274 | 0.034837 | 190528058 | 190529146 | 190531664 | 19053466 |
| 147 NA18980 | [2515685 chr4 | 4 | 190845771 | 191059687 | 213917 | 220 | 0.281419  | 0.010774 | 190845056 | 190846486 | 191059242 | 19106013 |
| 148 NA18980 | [2515685 chr4 | 4 | 191360676 | 191387775 | 27100  | 8   | -0.303364 | 0.056443 | 191359713 | 191361640 | 191384710 | 19139251 |
| 149 NA18980 | [2515685 chr5 | 5 | 261631    | 267968    | 6338   | 23  | 0.437986  | 0.033289 | 261032    | 262230    | 267662    | 268274   |
| 150 NA18980 | [2515685 chr5 | 5 | 520045    | 524631    | 4587   | 11  | 0.427855  | 0.048135 | 519662    | 520428    | 524217    | 525046   |
| 151 NA18980 | [2515685 chr5 | 5 | 541455    | 542488    | 1034   | 2   | 0.682475  | 0.11436  | 541111    | 541800    | 542200    | 542777   |
| 152 NA18980 | [2515685 chr5 | 5 | 950181    | 953016    | 2836   | 12  | 0.448814  | 0.046086 | 949756    | 950607    | 952851    | 953182   |
| 153 NA18980 | [2515685 chr5 | 5 | 1075284   | 1079920   | 4637   | 24  | 0.507892  | 0.032588 | 1074709   | 1075859   | 1079566   | 108027!  |
| 154 NA18980 | [2515685 chr5 | 5 | 1231558   | 1233247   | 1690   | 2   | -0.898719 | 0.113027 | 1231167   | 1231949   | 1232879   | 123361!  |
| 155 NA18980 | [2515685 chr5 | 5 | 17570241  | 17645404  | 75164  | 335 | -0.342207 | 0.008729 | 17569932  | 17570551  | 17645194  | 1764561! |
| 156 NA18980 | [2515685 chr5 | 5 | 17663728  | 17668807  | 5080   | 10  | -0.327275 | 0.050485 | 17663473  | 17663984  | 17668092  | 1766952! |
| 157 NA18980 | [2515685 chr5 | 5 | 19410747  | 19412172  | 1426   | 3   | -2.164848 | 0.135418 | 19410189  | 19411305  | 19411980  | 1941236! |
| 158 NA18980 | [2515685 chr5 | 5 | 49921406  | 49922753  | 1348   | 3   | 0.557169  | 0.092172 | 49921162  | 49921650  | 49922675  | 4992283! |
| 159 NA18980 | [2515685 chr5 | 5 | 69404835  | 69411352  | 6518   | 6   | 0.715906  | 0.067788 | 69404157  | 69405513  | 69410702  | 6941200! |
| 160 NA18980 | [2515685 chr5 | 5 | 70280260  | 70286789  | 6530   | 6   | 0.669738  | 0.066909 | 70279582  | 70280938  | 70286122  | 7028745! |
| 161 NA18980 | [2515685 chr5 | 5 | 81459213  | 81466055  | 6843   | 2   | -1.648658 | 0.132946 | 81455614  | 81462405  | 81462863  | 8147028! |
| 162 NA18980 | [2515685 chr5 | 5 | 98886464  | 98887692  | 1229   | 4   | -0.411038 | 0.079823 | 98886155  | 98886773  | 98887592  | 9888779! |
| 163 NA18980 | [2515685 chr5 | 5 | 115639875 | 115640944 | 1070   | 2   | -0.916185 | 0.15684  | 115639494 | 115640257 | 115640688 | 11564120 |
| 164 NA18980 | [2515685 chr5 | 5 | 137835178 | 137844134 | 8957   | 8   | 0.627071  | 0.05927  | 137834745 | 137835611 | 137843310 | 13784495 |
| 165 NA18980 | [2515685 chr5 | 5 | 140203081 | 140218928 | 15848  | 20  | 1.986679  | 0.053138 | 140202344 | 140203819 | 140218508 | 14021934 |
| 166 NA18980 | [2515685 chr5 | 5 | 140534849 | 140540106 | 5258   | 5   | 1.033399  | 0.072399 | 140534700 | 140534999 | 140539007 | 14054120 |
| 167 NA18980 | [2515685 chr5 | 5 | 150157909 | 150161837 | 3929   | 6   | -2.177681 | 0.094017 | 150157286 | 150158532 | 150161621 | 15016205 |
| 168 NA18980 | [2515685 chr5 | 5 | 150183322 | 150203801 | 20480  | 11  | -1.592825 | 0.060941 | 150181427 | 150185218 | 150203451 | 15020415 |
| 169 NA18980 | [2515685 chr5 | 5 | 165157996 | 165161604 | 3609   | 2   | -1.146765 | 0.12708  | 165155280 | 165160712 | 165160802 | 16516240 |
| 170 NA18980 | [2515685 chr5 | 5 | 180308895 | 180363417 | 54523  | 54  | 0.568239  | 0.022274 | 180308688 | 180309103 | 180363120 | 18036371 |
| 171 NA18980 | [2515685 chr6 | 6 | 201167    | 329495    | 128329 | 132 | 0.328943  | 0.013396 | 200920    | 201415    | 329127    | 329864   |
| 172 NA18980 | [2515685 chr6 | 6 | 29947668  | 30028127  | 80460  | 70  | 0.476507  | 0.019533 | 29945444  | 29949892  | 30027297  | 3002895! |
| 173 NA18980 | [2515685 chr6 | 6 | 32550352  | 32557802  | 7451   | 7   | -0.397925 | 0.060921 | 32550014  | 32550690  | 32557647  | 3255795! |
| 174 NA18980 | [2515685 chr6 | 6 | 32557802  | 32558865  | 1064   | 2   | 0.784632  | 0.115995 | 32557647  | 32557958  | 32558698  | 3255903! |
| 175 NA18980 | [2515685 chr6 | 6 | 32565102  | 32586862  | 21761  | 3   | -3.128758 | 0.238226 | 32564888  | 32565316  | 32586127  | 3258759! |
| 176 NA18980 | [2515685 chr6 | 6 | 32586862  | 32588830  | 1969   | 3   | -0.648123 | 0.115883 | 32586127  | 32587597  | 32588323  | 3258933! |
| 177 NA18980 | [2515685 chr6 | 6 | 32589957  | 32591649  | 1693   | 3   | -1.447429 | 0.114994 | 32589338  | 32590576  | 32591403  | 3259189! |
| 178 NA18980 | [2515685 chr6 | 6 | 32598573  | 32632349  | 33777  | 28  | -0.696852 | 0.034889 | 32598133  | 32599013  | 32632089  | 3263261! |
| 179 NA18980 | [2515685 chr6 | 6 | 32644282  | 32646910  | 2629   | 3   | -0.592687 | 0.10143  | 32644104  | 32644460  | 32645703  | 3264811! |
| 180 NA18980 | [2515685 chr6 | 6 | 32653862  | 32655482  | 1621   | 3   | 0.661128  | 0.118385 | 32653679  | 32654046  | 32654980  | 3265598! |
| 181 NA18980 | [2515685 chr6 | 6 | 32657916  | 32659325  | 1410   | 2   | -2.830501 | 0.227404 | 32657216  | 32658616  | 32658959  | 3265969! |
| 182 NA18980 | [2515685 chr6 | 6 | 32672888  | 32680221  | 7334   | 6   | 0.565641  | 0.068964 | 32672612  | 32673164  | 32679896  | 3268054! |
| 183 NA18980 | [2515685 chr6 | 6 | 32712337  | 32732004  | 19668  | 18  | 0.549947  | 0.035148 | 32712193  | 32712482  | 32731216  | 3273279! |
| 184 NA18980 | [2515685 chr6 | 6 | 32741849  | 32744343  | 2495   | 4   | 0.650373  | 0.083745 | 32741631  | 32742067  | 32744136  | 3274455! |
| 185 NA18980 | [2515685 chr6 | 6 | 35862833  | 35874426  | 11594  | 13  | 0.442998  | 0.044884 | 35862530  | 35863136  | 35873957  | 3587489! |

|             |               |   |           |           |        |     |           |          |           |           |           |           |
|-------------|---------------|---|-----------|-----------|--------|-----|-----------|----------|-----------|-----------|-----------|-----------|
| 186 NA18980 | [2515685 chr6 | 6 | 54036900  | 54042384  | 5485   | 5   | 3.836012  | 0.148047 | 54036573  | 54037227  | 54041771  | 54042991  |
| 187 NA18980 | [2515685 chr6 | 6 | 74648985  | 74654614  | 5630   | 10  | -2.572104 | 0.082226 | 74648748  | 74649222  | 74653982  | 74655247  |
| 188 NA18980 | [2515685 chr6 | 6 | 75086849  | 75088260  | 1412   | 2   | -0.681926 | 0.114891 | 75086537  | 75087162  | 75087931  | 75088581  |
| 189 NA18980 | [2515685 chr6 | 6 | 77073648  | 77085280  | 11633  | 11  | -0.843295 | 0.050888 | 77073369  | 77073927  | 77084753  | 77085801  |
| 190 NA18980 | [2515685 chr6 | 6 | 77495034  | 77513511  | 18478  | 12  | 0.658402  | 0.049803 | 77493568  | 77496500  | 77510011  | 77517691  |
| 191 NA18980 | [2515685 chr6 | 6 | 78986374  | 78987970  | 1597   | 4   | -0.407422 | 0.079824 | 78986211  | 78986537  | 78987700  | 78988247  |
| 192 NA18980 | [2515685 chr6 | 6 | 79023318  | 79093263  | 69946  | 70  | 0.746314  | 0.020187 | 79022028  | 79024609  | 79091909  | 79094611  |
| 193 NA18980 | [2515685 chr6 | 6 | 79166385  | 79184605  | 18221  | 5   | -0.434818 | 0.072802 | 79166093  | 79166678  | 79184272  | 79184931  |
| 194 NA18980 | [2515685 chr6 | 6 | 103844685 | 103871201 | 26517  | 17  | 2.218043  | 0.067738 | 103844347 | 103845023 | 103868241 | 10387416  |
| 195 NA18980 | [2515685 chr6 | 6 | 109991983 | 110000118 | 8136   | 9   | -0.274627 | 0.054139 | 109991846 | 109992120 | 109999981 | 11000025  |
| 196 NA18980 | [2515685 chr6 | 6 | 115165877 | 115168878 | 3002   | 2   | -0.966158 | 0.151848 | 115165425 | 115166330 | 115168514 | 11516924  |
| 197 NA18980 | [2515685 chr6 | 6 | 120671191 | 120671916 | 726    | 2   | 0.797048  | 0.117992 | 120670696 | 120671686 | 120671725 | 12067210  |
| 198 NA18980 | [2515685 chr6 | 6 | 134673338 | 134675025 | 1688   | 2   | -0.857557 | 0.113432 | 134672845 | 134673832 | 134674728 | 13467532  |
| 199 NA18980 | [2515685 chr6 | 6 | 160690579 | 160697100 | 6522   | 5   | 0.41476   | 0.071828 | 160689749 | 160691409 | 160696605 | 16069759  |
| 200 NA18980 | [2515685 chr6 | 6 | 160997684 | 161040123 | 42440  | 69  | 0.493937  | 0.019238 | 160997465 | 160997903 | 161039033 | 16104121  |
| 201 NA18980 | [2515685 chr6 | 6 | 167479669 | 167482583 | 2915   | 2   | 0.877298  | 0.112889 | 167479005 | 167480333 | 167482187 | 16748297  |
| 202 NA18980 | [2515685 chr6 | 6 | 167768770 | 167772941 | 4172   | 11  | 0.406535  | 0.048136 | 167768683 | 167768857 | 167772637 | 16777324  |
| 203 NA18980 | [2515685 chr6 | 6 | 170570659 | 170571491 | 833    | 7   | 0.331037  | 0.06034  | 170570596 | 170570723 | 170571251 | 17057173  |
| 204 NA18980 | [2515685 chr6 | 6 | 170603879 | 170604666 | 788    | 2   | -0.725873 | 0.112886 | 170603541 | 170604217 | 170604339 | 17060499  |
| 205 NA18980 | [2515685 chr7 | 7 | 246731    | 254518    | 7788   | 10  | -0.804101 | 0.052276 | 246346    | 247117    | 254199    | 254838    |
| 206 NA18980 | [2515685 chr7 | 7 | 1084125   | 1086660   | 2536   | 15  | 0.632909  | 0.041221 | 1083752   | 1084499   | 105871    | 108744    |
| 207 NA18980 | [2515685 chr7 | 7 | 3384111   | 3392457   | 8347   | 8   | 0.889076  | 0.058483 | 3383451   | 3384772   | 3390107   | 3395611   |
| 208 NA18980 | [2515685 chr7 | 7 | 12297894  | 12298675  | 782    | 5   | -0.59855  | 0.071397 | 12297829  | 12297960  | 12298540  | 12298817  |
| 209 NA18980 | [2515685 chr7 | 7 | 14841855  | 14845387  | 3533   | 5   | -0.407768 | 0.076447 | 14841514  | 14842197  | 14845150  | 14845627  |
| 210 NA18980 | [2515685 chr7 | 7 | 38159778  | 38176559  | 16782  | 18  | -0.372988 | 0.037774 | 38159476  | 38160081  | 38175778  | 38177347  |
| 211 NA18980 | [2515685 chr7 | 7 | 43773800  | 43943924  | 170125 | 112 | 0.36248   | 0.015084 | 43773256  | 43774344  | 43941574  | 44020061  |
| 212 NA18980 | [2515685 chr7 | 7 | 56536079  | 56544240  | 8162   | 2   | -2.632997 | 0.181924 | 56475495  | 56538429  | 56542365  | 56546111  |
| 213 NA18980 | [2515685 chr7 | 7 | 63997159  | 64008697  | 11539  | 14  | 0.376516  | 0.042851 | 63996513  | 63997805  | 64008352  | 64009047  |
| 214 NA18980 | [2515685 chr7 | 7 | 64029672  | 64045487  | 15816  | 45  | -0.374315 | 0.023813 | 64029291  | 64030053  | 64045069  | 64045901  |
| 215 NA18980 | [2515685 chr7 | 7 | 64464087  | 64479903  | 15817  | 43  | -0.354399 | 0.024357 | 64463669  | 64464506  | 64479522  | 64480281  |
| 216 NA18980 | [2515685 chr7 | 7 | 64540847  | 64556662  | 15816  | 45  | -0.353349 | 0.023809 | 64540466  | 64541228  | 64556244  | 64557081  |
| 217 NA18980 | [2515685 chr7 | 7 | 64691204  | 64725545  | 34342  | 38  | 0.418713  | 0.026166 | 64690582  | 64691826  | 64725209  | 64725881  |
| 218 NA18980 | [2515685 chr7 | 7 | 66187807  | 66199025  | 11219  | 28  | 0.296349  | 0.03017  | 66187743  | 66187871  | 66197851  | 66200201  |
| 219 NA18980 | [2515685 chr7 | 7 | 69866390  | 69869623  | 3234   | 4   | 0.517235  | 0.081183 | 69865412  | 69867368  | 69869269  | 69869971  |
| 220 NA18980 | [2515685 chr7 | 7 | 69869623  | 69871056  | 1434   | 2   | 3.060197  | 0.17538  | 69869269  | 69869978  | 69870420  | 69871691  |
| 221 NA18980 | [2515685 chr7 | 7 | 71858072  | 71858711  | 640    | 2   | -0.564853 | 0.112887 | 71857860  | 71858284  | 71858703  | 71858711  |
| 222 NA18980 | [2515685 chr7 | 7 | 71938916  | 71939766  | 851    | 5   | 0.524374  | 0.071396 | 71938731  | 71939101  | 71939618  | 71939917  |
| 223 NA18980 | [2515685 chr7 | 7 | 74140710  | 74152948  | 12239  | 32  | 0.287637  | 0.028222 | 74140577  | 74140844  | 74152918  | 74152971  |
| 224 NA18980 | [2515685 chr7 | 7 | 74558360  | 74559208  | 849    | 5   | 0.524374  | 0.071396 | 74558212  | 74558508  | 74559023  | 74559391  |
| 225 NA18980 | [2515685 chr7 | 7 | 74586379  | 74587231  | 853    | 5   | 0.524375  | 0.071396 | 74586231  | 74586527  | 74587046  | 74587411  |
| 226 NA18980 | [2515685 chr7 | 7 | 74614403  | 74615250  | 848    | 5   | 0.524375  | 0.071396 | 74614255  | 74614551  | 74615065  | 74615431  |
| 227 NA18980 | [2515685 chr7 | 7 | 74694637  | 74696139  | 1503   | 4   | -0.425255 | 0.079823 | 74693968  | 74695306  | 74695977  | 74696301  |
| 228 NA18980 | [2515685 chr7 | 7 | 74767975  | 74783402  | 15428  | 34  | 0.263737  | 0.027379 | 74767911  | 74768039  | 74782714  | 74784091  |
| 229 NA18980 | [2515685 chr7 | 7 | 75790452  | 75794984  | 4533   | 5   | -0.524842 | 0.072853 | 75790248  | 75790656  | 75794325  | 75795641  |
| 230 NA18980 | [2515685 chr7 | 7 | 75800166  | 75814938  | 14773  | 33  | 0.259005  | 0.027791 | 75799479  | 75800854  | 75814512  | 75815361  |
| 231 NA18980 | [2515685 chr7 | 7 | 76336944  | 76338655  | 1712   | 2   | 0.799712  | 0.112887 | 76336621  | 76337268  | 76338090  | 76339221  |
| 232 NA18980 | [2515685 chr7 | 7 | 89455601  | 89456632  | 1032   | 2   | 5.048841  | 0.256931 | 89455373  | 89455830  | 89456225  | 89457031  |
| 233 NA18980 | [2515685 chr7 | 7 | 90676411  | 90686518  | 10108  | 14  | -0.689966 | 0.044815 | 90674727  | 90678095  | 90685238  | 90687791  |
| 234 NA18980 | [2515685 chr7 | 7 | 92971481  | 92976895  | 5415   | 4   | 0.554285  | 0.08538  | 92971060  | 92971903  | 92975569  | 92978227  |
| 235 NA18980 | [2515685 chr7 | 7 | 101575355 | 101592919 | 17565  | 42  | 0.258429  | 0.024634 | 101575283 | 101575428 | 101592828 | 10159301  |
| 236 NA18980 | [2515685 chr7 | 7 | 101710080 | 101925433 | 215354 | 312 | 0.414052  | 0.009056 | 101709235 | 101710926 | 101924670 | 10192619  |
| 237 NA18980 | [2515685 chr7 | 7 | 109776378 | 109782655 | 6278   | 5   | 0.817114  | 0.078778 | 109775821 | 109776936 | 109782301 | 109783011 |
| 238 NA18980 | [2515685 chr7 | 7 | 125255304 | 125256569 | 1266   | 2   | -0.866286 | 0.153094 | 125254926 | 125255682 | 125256246 | 12525689  |
| 239 NA18980 | [2515685 chr7 | 7 | 133241895 | 133257359 | 15465  | 16  | 1.979163  | 0.059959 | 133240782 | 133243008 | 133255009 | 13326093  |
| 240 NA18980 | [2515685 chr7 | 7 | 141962017 | 141978673 | 16657  | 22  | -0.735548 | 0.035808 | 141961693 | 141962342 | 141978355 | 14197899  |

|             |               |   |           |           |        |     |           |          |           |           |           |           |
|-------------|---------------|---|-----------|-----------|--------|-----|-----------|----------|-----------|-----------|-----------|-----------|
| 241 NA18980 | [2515685 chr7 | 7 | 141979979 | 141993247 | 13269  | 13  | -0.272781 | 0.044445 | 141979704 | 141980254 | 141992651 | 14199384  |
| 242 NA18980 | [2515685 chr7 | 7 | 143251962 | 143259681 | 7720   | 7   | -0.414334 | 0.060886 | 143251733 | 143252191 | 143259380 | 14325998  |
| 243 NA18980 | [2515685 chr7 | 7 | 149285428 | 149287696 | 2269   | 3   | -0.575226 | 0.095979 | 149285181 | 149285676 | 149286346 | 14928904  |
| 244 NA18980 | [2515685 chr7 | 7 | 152921781 | 152934280 | 12500  | 7   | -0.320297 | 0.06135  | 152921552 | 152922011 | 152934046 | 15293451  |
| 245 NA18980 | [2515685 chr7 | 7 | 152948945 | 152951306 | 2362   | 3   | -0.550363 | 0.095172 | 152947501 | 152950389 | 152951051 | 15295156  |
| 246 NA18980 | [2515685 chr7 | 7 | 156829107 | 156847718 | 18612  | 9   | -0.319263 | 0.054326 | 156785179 | 156831457 | 156847412 | 15684802  |
| 247 NA18980 | [2515685 chr7 | 7 | 157017083 | 157018249 | 1167   | 2   | 0.646377  | 0.112887 | 157016604 | 157017563 | 157017820 | 15701867  |
| 248 NA18980 | [2515685 chr7 | 7 | 158617060 | 158624378 | 7319   | 6   | 0.751869  | 0.069236 | 158616763 | 158617357 | 158622028 | 15862672  |
| 249 NA18980 | [2515685 chr8 | 8 | 1328256   | 1343509   | 15254  | 45  | -0.341712 | 0.024048 | 1327688   | 1328824   | 1342795   | 1344224   |
| 250 NA18980 | [2515685 chr8 | 8 | 2202770   | 2204550   | 1781   | 4   | 0.46316   | 0.079823 | 2202506   | 2203034   | 2203659   | 2205447   |
| 251 NA18980 | [2515685 chr8 | 8 | 2238735   | 2253792   | 15058  | 10  | 0.714627  | 0.051602 | 2233839   | 2241488   | 2251039   | 2257526   |
| 252 NA18980 | [2515685 chr8 | 8 | 4110204   | 4112526   | 2323   | 2   | 3.123757  | 0.237213 | 4109692   | 4110717   | 4112031   | 4113022   |
| 253 NA18980 | [2515685 chr8 | 8 | 4680512   | 4689507   | 8996   | 10  | -0.280917 | 0.051102 | 4680214   | 4680811   | 4689273   | 4689747   |
| 254 NA18980 | [2515685 chr8 | 8 | 5582875   | 5594011   | 11137  | 9   | 0.741785  | 0.054334 | 5582615   | 5583135   | 5592820   | 5595203   |
| 255 NA18980 | [2515685 chr8 | 8 | 5817892   | 5820042   | 2151   | 2   | -0.842291 | 0.133011 | 5817072   | 5818713   | 5819661   | 5820423   |
| 256 NA18980 | [2515685 chr8 | 8 | 6812413   | 6813967   | 1555   | 2   | 0.639988  | 0.112887 | 6811881   | 6812946   | 6813560   | 6814375   |
| 257 NA18980 | [2515685 chr8 | 8 | 6817073   | 6866734   | 49662  | 88  | 0.685348  | 0.017165 | 6816809   | 6817338   | 6866719   | 6866750   |
| 258 NA18980 | [2515685 chr8 | 8 | 7176337   | 7187950   | 11614  | 33  | 0.596141  | 0.027992 | 7176045   | 7176630   | 7187698   | 7188202   |
| 259 NA18980 | [2515685 chr8 | 8 | 7242270   | 7245322   | 3053   | 2   | -0.586092 | 0.112887 | 7240108   | 7244433   | 7244455   | 7246190   |
| 260 NA18980 | [2515685 chr8 | 8 | 7806132   | 7807778   | 1647   | 2   | -0.586092 | 0.112887 | 7805266   | 7806999   | 7807021   | 7808532   |
| 261 NA18980 | [2515685 chr8 | 8 | 7862281   | 7873897   | 11617  | 34  | 0.59134   | 0.027544 | 7862030   | 7862533   | 7873605   | 7874190   |
| 262 NA18980 | [2515685 chr8 | 8 | 12023134  | 12035286  | 12153  | 33  | 0.575058  | 0.028006 | 12022997  | 12023272  | 12034973  | 12035592  |
| 263 NA18980 | [2515685 chr8 | 8 | 12035788  | 12037147  | 1360   | 3   | -0.538099 | 0.094962 | 12035599  | 12035978  | 12037108  | 12037182  |
| 264 NA18980 | [2515685 chr8 | 8 | 12275692  | 12284041  | 8350   | 16  | 0.600986  | 0.040323 | 12275477  | 12275908  | 12283622  | 12284466  |
| 265 NA18980 | [2515685 chr8 | 8 | 16245461  | 16251509  | 6049   | 6   | -0.733401 | 0.068295 | 16245129  | 16245794  | 16250812  | 16252202  |
| 266 NA18980 | [2515685 chr8 | 8 | 17560841  | 17566854  | 6014   | 6   | -0.354059 | 0.065175 | 17560553  | 17561130  | 17566540  | 17567161  |
| 267 NA18980 | [2515685 chr8 | 8 | 20022286  | 20024771  | 2486   | 2   | -1.017198 | 0.119863 | 20021082  | 20023491  | 20024338  | 20025202  |
| 268 NA18980 | [2515685 chr8 | 8 | 20042839  | 20050925  | 8087   | 16  | 0.459782  | 0.040124 | 20042443  | 20043236  | 20050559  | 20051292  |
| 269 NA18980 | [2515685 chr8 | 8 | 25028407  | 25046917  | 18511  | 15  | -0.847225 | 0.042017 | 25027885  | 25028930  | 25046777  | 25047052  |
| 270 NA18980 | [2515685 chr8 | 8 | 25466015  | 25471689  | 5675   | 4   | -0.895247 | 0.089311 | 25464392  | 25467638  | 25470702  | 25472671  |
| 271 NA18980 | [2515685 chr8 | 8 | 39351178  | 39506673  | 155496 | 163 | 0.724727  | 0.013222 | 39350826  | 39351530  | 39505284  | 39508062  |
| 272 NA18980 | [2515685 chr8 | 8 | 54001807  | 54002677  | 871    | 2   | -0.948676 | 0.120643 | 54001673  | 54001942  | 54002470  | 54002882  |
| 273 NA18980 | [2515685 chr8 | 8 | 58278355  | 58287850  | 9496   | 8   | 0.83766   | 0.057995 | 58277116  | 58279595  | 58287616  | 58288082  |
| 274 NA18980 | [2515685 chr8 | 8 | 72377031  | 72379533  | 2503   | 2   | -0.775761 | 0.116211 | 72376214  | 72377848  | 72379220  | 72379842  |
| 275 NA18980 | [2515685 chr8 | 8 | 85423649  | 85431920  | 8272   | 7   | 0.970183  | 0.062877 | 85423043  | 85424256  | 85431347  | 85432492  |
| 276 NA18980 | [2515685 chr8 | 8 | 86742169  | 86910255  | 168087 | 105 | 0.380524  | 0.015628 | 86741757  | 86742581  | 86910002  | 86910502  |
| 277 NA18980 | [2515685 chr8 | 8 | 115702151 | 115715316 | 13166  | 12  | -0.69741  | 0.050306 | 115701237 | 115703065 | 115712563 | 115718742 |
| 278 NA18980 | [2515685 chr8 | 8 | 117699256 | 117701862 | 2607   | 2   | -0.986286 | 0.117708 | 117698548 | 117699965 | 117701352 | 117702372 |
| 279 NA18980 | [2515685 chr8 | 8 | 120222661 | 120229952 | 7292   | 6   | 0.692475  | 0.067383 | 120218251 | 120225414 | 120229434 | 120230472 |
| 280 NA18980 | [2515685 chr8 | 8 | 144782811 | 144785960 | 3150   | 2   | -0.932572 | 0.115137 | 144771440 | 144785564 | 144785821 | 144786092 |
| 281 NA18980 | [2515685 chr8 | 8 | 145573252 | 145578369 | 5118   | 32  | 0.310798  | 0.028222 | 145572258 | 145574246 | 145578158 | 14557858  |
| 282 NA18980 | [2515685 chr9 | 9 | 310045    | 312573    | 2529   | 61  | 0.667708  | 0.020441 | 309952    | 310139    | 312407    | 312740    |
| 283 NA18980 | [2515685 chr9 | 9 | 12462510  | 12470628  | 8119   | 6   | -0.366532 | 0.067893 | 12461944  | 12463076  | 12470335  | 12470922  |
| 284 NA18980 | [2515685 chr9 | 9 | 33789424  | 33797271  | 7848   | 11  | -0.303081 | 0.048135 | 33789218  | 33789631  | 33797111  | 33797432  |
| 285 NA18980 | [2515685 chr9 | 9 | 38763857  | 38953152  | 189296 | 332 | -0.294593 | 0.008842 | 38761896  | 38765818  | 38953132  | 38953172  |
| 286 NA18980 | [2515685 chr9 | 9 | 41147779  | 41281233  | 133455 | 241 | -0.266094 | 0.010383 | 41147321  | 41148237  | 41280666  | 41281800  |
| 287 NA18980 | [2515685 chr9 | 9 | 42283396  | 42287032  | 3637   | 11  | 0.261747  | 0.048143 | 42282425  | 42284368  | 42286677  | 42287382  |
| 288 NA18980 | [2515685 chr9 | 9 | 43885522  | 43886459  | 938    | 2   | 0.760979  | 0.115549 | 43885267  | 43885778  | 43886107  | 43886812  |
| 289 NA18980 | [2515685 chr9 | 9 | 44045522  | 44063066  | 17545  | 12  | -0.369558 | 0.046086 | 44045360  | 44045685  | 44062717  | 44063412  |
| 290 NA18980 | [2515685 chr9 | 9 | 44450516  | 44505195  | 54680  | 46  | -0.267799 | 0.023551 | 44450229  | 44450804  | 44504610  | 44505780  |
| 291 NA18980 | [2515685 chr9 | 9 | 45412244  | 45417672  | 5429   | 15  | -0.259839 | 0.041221 | 45412015  | 45412473  | 45417629  | 45417712  |
| 292 NA18980 | [2515685 chr9 | 9 | 45517027  | 45523073  | 6047   | 10  | -0.309102 | 0.050485 | 45516856  | 45517198  | 45522938  | 45523202  |
| 293 NA18980 | [2515685 chr9 | 9 | 65059161  | 65062940  | 3780   | 10  | 0.253846  | 0.050493 | 65058666  | 65059657  | 65061967  | 65063912  |
| 294 NA18980 | [2515685 chr9 | 9 | 65960217  | 66148053  | 187837 | 310 | -0.264692 | 0.009158 | 65959759  | 65960675  | 66147715  | 66148392  |
| 295 NA18980 | [2515685 chr9 | 9 | 66762244  | 66837262  | 75019  | 27  | 0.258516  | 0.030724 | 66761966  | 66762523  | 66837080  | 66837442  |

|             |                |    |           |           |        |     |           |          |           |           |           |          |
|-------------|----------------|----|-----------|-----------|--------|-----|-----------|----------|-----------|-----------|-----------|----------|
| 296 NA18980 | [2515685 chr9  | 9  | 76837170  | 76846886  | 9717   | 10  | -0.262435 | 0.050943 | 76836891  | 76837449  | 76846585  | 76847187 |
| 297 NA18980 | [2515685 chr9  | 9  | 84139996  | 84251052  | 111057 | 2   | -0.701085 | 0.118142 | 84055177  | 84142357  | 84248691  | 84304466 |
| 298 NA18980 | [2515685 chr9  | 9  | 89405187  | 89407924  | 2738   | 2   | -0.996726 | 0.115359 | 89404572  | 89405803  | 89407164  | 89408681 |
| 299 NA18980 | [2515685 chr9  | 9  | 112994293 | 112996380 | 2088   | 2   | 0.768203  | 0.115248 | 112993830 | 112994757 | 112996055 | 11299670 |
| 300 NA18980 | [2515685 chr9  | 9  | 138397610 | 138399802 | 2193   | 11  | 0.263274  | 0.048135 | 138397471 | 138397749 | 138399705 | 13839989 |
| 301 NA18980 | [2515685 chr10 | 10 | 6693908   | 6703893   | 9986   | 8   | 0.766092  | 0.059222 | 6692231   | 6695585   | 6703779   | 6704008  |
| 302 NA18980 | [2515685 chr10 | 10 | 20888201  | 20900112  | 11912  | 9   | -0.818024 | 0.056109 | 20883329  | 20890946  | 20897367  | 20902917 |
| 303 NA18980 | [2515685 chr10 | 10 | 37488261  | 37529195  | 40935  | 62  | -0.31233  | 0.020307 | 37487986  | 37488536  | 37528890  | 37529500 |
| 304 NA18980 | [2515685 chr10 | 10 | 42558098  | 42565662  | 7565   | 12  | -0.433471 | 0.046772 | 42557914  | 42558283  | 42565423  | 42565907 |
| 305 NA18980 | [2515685 chr10 | 10 | 42647233  | 42650729  | 3497   | 7   | 0.335357  | 0.060513 | 42647118  | 42647349  | 42650066  | 42651397 |
| 306 NA18980 | [2515685 chr10 | 10 | 45494180  | 45521306  | 27127  | 64  | -0.311838 | 0.019961 | 45494173  | 45494187  | 45520778  | 45521837 |
| 307 NA18980 | [2515685 chr10 | 10 | 45642385  | 45669230  | 26846  | 67  | -0.293789 | 0.019513 | 45642368  | 45642402  | 45669067  | 45669397 |
| 308 NA18980 | [2515685 chr10 | 10 | 46104076  | 46140234  | 36159  | 57  | -0.416621 | 0.021195 | 46104060  | 46104113  | 46139456  | 46141017 |
| 309 NA18980 | [2515685 chr10 | 10 | 46166806  | 46207293  | 40488  | 122 | -0.303714 | 0.014523 | 46166624  | 46166988  | 46204548  | 46210477 |
| 310 NA18980 | [2515685 chr10 | 10 | 46230274  | 46415540  | 185267 | 297 | -0.35652  | 0.004668 | 46230243  | 46230306  | 46415069  | 46416017 |
| 311 NA18980 | [2515685 chr10 | 10 | 46418511  | 47056779  | 638269 | 875 | -0.35652  | 0.004668 | 46418313  | 46418710  | 47056204  | 47057357 |
| 312 NA18980 | [2515685 chr10 | 10 | 47079373  | 47089916  | 10544  | 9   | -0.455785 | 0.053266 | 47079175  | 47079572  | 47089765  | 47090061 |
| 313 NA18980 | [2515685 chr10 | 10 | 47157582  | 47168323  | 10742  | 14  | -0.54738  | 0.044021 | 47157246  | 47157919  | 47168037  | 47168601 |
| 314 NA18980 | [2515685 chr10 | 10 | 47172377  | 47173707  | 1331   | 3   | -0.752733 | 0.092961 | 47172193  | 47172562  | 47173507  | 47173907 |
| 315 NA18980 | [2515685 chr10 | 10 | 47190656  | 47200896  | 10241  | 26  | -0.402037 | 0.03132  | 47190574  | 47190738  | 47200104  | 47201681 |
| 316 NA18980 | [2515685 chr10 | 10 | 47230731  | 47231502  | 772    | 2   | -0.726032 | 0.112887 | 47230574  | 47230889  | 47231201  | 47231807 |
| 317 NA18980 | [2515685 chr10 | 10 | 47723237  | 47738097  | 14861  | 40  | -0.442771 | 0.015895 | 47575187  | 47725982  | 47737802  | 47738397 |
| 318 NA18980 | [2515685 chr10 | 10 | 47739640  | 47757153  | 17514  | 56  | -0.442771 | 0.015895 | 47739505  | 47739775  | 47757064  | 47757247 |
| 319 NA18980 | [2515685 chr10 | 10 | 47781269  | 47814508  | 33240  | 104 | -0.31147  | 0.015731 | 47778091  | 47784014  | 47814414  | 47814607 |
| 320 NA18980 | [2515685 chr10 | 10 | 47848448  | 47858250  | 9803   | 27  | -0.422942 | 0.030737 | 47848049  | 47848847  | 47857458  | 47859047 |
| 321 NA18980 | [2515685 chr10 | 10 | 47889059  | 47889830  | 772    | 2   | -0.726032 | 0.112887 | 47888902  | 47889217  | 47889529  | 47890137 |
| 322 NA18980 | [2515685 chr10 | 10 | 48501208  | 48529999  | 28792  | 55  | -0.407065 | 0.021554 | 48500950  | 48501466  | 48529215  | 48530787 |
| 323 NA18980 | [2515685 chr10 | 10 | 48564557  | 48591834  | 27278  | 86  | -0.31073  | 0.017258 | 48564533  | 48564582  | 48591775  | 48591897 |
| 324 NA18980 | [2515685 chr10 | 10 | 48593103  | 48597045  | 3943   | 5   | -0.627696 | 0.072674 | 48592794  | 48593413  | 48594300  | 48600237 |
| 325 NA18980 | [2515685 chr10 | 10 | 48620019  | 48865591  | 245573 | 176 | -0.394346 | 0.012069 | 48619988  | 48620051  | 48865564  | 48865611 |
| 326 NA18980 | [2515685 chr10 | 10 | 48887243  | 48897482  | 10240  | 29  | -0.423641 | 0.02968  | 48886453  | 48888033  | 48897400  | 48897567 |
| 327 NA18980 | [2515685 chr10 | 10 | 48923270  | 48927636  | 4367   | 18  | -0.403903 | 0.037835 | 48923088  | 48923452  | 48927550  | 48927727 |
| 328 NA18980 | [2515685 chr10 | 10 | 50894581  | 50922854  | 28274  | 72  | -0.298206 | 0.018822 | 50894321  | 50894841  | 50922691  | 50923011 |
| 329 NA18980 | [2515685 chr10 | 10 | 51067559  | 51163422  | 95864  | 97  | -0.322903 | 0.016227 | 51067485  | 51067634  | 51162458  | 51164381 |
| 330 NA18980 | [2515685 chr10 | 10 | 51402505  | 51441846  | 39342  | 97  | -0.257325 | 0.01629  | 51402225  | 51402785  | 51441420  | 51442277 |
| 331 NA18980 | [2515685 chr10 | 10 | 55103812  | 55106748  | 2937   | 4   | -0.48828  | 0.091445 | 55103513  | 55104111  | 55106360  | 55107137 |
| 332 NA18980 | [2515685 chr10 | 10 | 56117212  | 56139275  | 22064  | 20  | -0.950552 | 0.037431 | 56115764  | 56118661  | 56138931  | 56139611 |
| 333 NA18980 | [2515685 chr10 | 10 | 66977355  | 66985193  | 7839   | 8   | -0.889667 | 0.062659 | 66976803  | 66977908  | 66984894  | 66985497 |
| 334 NA18980 | [2515685 chr10 | 10 | 70951158  | 70961194  | 10037  | 7   | -0.788919 | 0.063866 | 70949290  | 70953027  | 70960964  | 70961421 |
| 335 NA18980 | [2515685 chr10 | 10 | 75096546  | 75127249  | 30704  | 35  | -0.336731 | 0.026985 | 75096530  | 75096563  | 75126882  | 75127611 |
| 336 NA18980 | [2515685 chr10 | 10 | 81662845  | 81668479  | 5635   | 8   | -0.365659 | 0.056843 | 81662614  | 81663077  | 81668415  | 81668547 |
| 337 NA18980 | [2515685 chr10 | 10 | 88750204  | 88760923  | 10720  | 20  | -0.372721 | 0.035721 | 88749997  | 88750412  | 88759795  | 88762057 |
| 338 NA18980 | [2515685 chr10 | 10 | 88866216  | 88948595  | 82380  | 94  | -0.422352 | 0.016531 | 88865617  | 88866816  | 88948288  | 88948907 |
| 339 NA18980 | [2515685 chr10 | 10 | 88988845  | 88993912  | 5068   | 8   | -0.39149  | 0.056469 | 88988469  | 88989222  | 88991607  | 88996217 |
| 340 NA18980 | [2515685 chr10 | 10 | 89008194  | 89016296  | 8103   | 9   | -0.455842 | 0.053282 | 89006526  | 89009863  | 89014572  | 89018027 |
| 341 NA18980 | [2515685 chr10 | 10 | 89162001  | 89174790  | 12790  | 21  | -0.427401 | 0.035203 | 89161450  | 89162553  | 89174490  | 89175097 |
| 342 NA18980 | [2515685 chr10 | 10 | 89221150  | 89231900  | 10751  | 13  | -0.372669 | 0.044316 | 89219426  | 89222875  | 89231438  | 89232367 |
| 343 NA18980 | [2515685 chr10 | 10 | 89237750  | 89249961  | 12212  | 11  | -0.412337 | 0.048625 | 89237445  | 89238056  | 89249436  | 89250487 |
| 344 NA18980 | [2515685 chr10 | 10 | 114102241 | 114106477 | 4237   | 5   | 0.96438   | 0.075869 | 114101694 | 114102788 | 114105867 | 11410708 |
| 345 NA18980 | [2515685 chr10 | 10 | 124336365 | 124341749 | 5385   | 6   | 0.949581  | 0.067547 | 124335581 | 124337149 | 124341238 | 12434226 |
| 346 NA18980 | [2515685 chr10 | 10 | 124345789 | 124348266 | 2478   | 3   | 0.500604  | 0.092172 | 124345154 | 124346424 | 124348238 | 12434829 |
| 347 NA18980 | [2515685 chr10 | 10 | 127564343 | 127586910 | 22568  | 18  | -0.350064 | 0.037705 | 127563306 | 127565381 | 127584165 | 12759187 |
| 348 NA18980 | [2515685 chr10 | 10 | 134924761 | 134927215 | 2455   | 18  | 0.284417  | 0.037629 | 134924706 | 134924816 | 134926924 | 13492750 |
| 349 NA18980 | [2515685 chr10 | 10 | 135179346 | 135183528 | 4183   | 23  | 0.408892  | 0.033289 | 135178919 | 135179774 | 135183320 | 13518373 |
| 350 NA18980 | [2515685 chr10 | 10 | 135365507 | 135367159 | 1653   | 2   | 0.582275  | 0.115714 | 135364999 | 135366016 | 135366656 | 13536766 |



|             |                |    |           |           |        |     |           |          |           |           |           |           |
|-------------|----------------|----|-----------|-----------|--------|-----|-----------|----------|-----------|-----------|-----------|-----------|
| 351 NA18980 | [2515685 chr10 | 10 | 135367159 | 135389814 | 22656  | 19  | -0.281808 | 0.036625 | 135366656 | 135367663 | 135387500 | 13539212  |
| 352 NA18980 | [2515685 chr11 | 11 | 3586847   | 3588843   | 1997   | 2   | -0.682111 | 0.11494  | 3585997   | 3587698   | 3588486   | 3589200   |
| 353 NA18980 | [2515685 chr11 | 11 | 4924831   | 4933540   | 8710   | 9   | -0.868554 | 0.055181 | 4924403   | 4925260   | 4933251   | 4933830   |
| 354 NA18980 | [2515685 chr11 | 11 | 5717038   | 5722027   | 4990   | 3   | 2.969766  | 0.148021 | 5716660   | 5717416   | 5718945   | 5725487   |
| 355 NA18980 | [2515685 chr11 | 11 | 5741269   | 5765993   | 24725  | 32  | 2.172919  | 0.04253  | 5741059   | 5741480   | 5765632   | 5766354   |
| 356 NA18980 | [2515685 chr11 | 11 | 5846090   | 5891945   | 45856  | 47  | 0.522571  | 0.02356  | 5839952   | 5849172   | 5891689   | 5892202   |
| 357 NA18980 | [2515685 chr11 | 11 | 11780222  | 11782174  | 1953   | 2   | -1.823115 | 0.145173 | 11779958  | 11780486  | 11781057  | 11783297  |
| 358 NA18980 | [2515685 chr11 | 11 | 11831868  | 11833089  | 1222   | 2   | 0.95255   | 0.136735 | 11831412  | 11832324  | 11832853  | 11833321  |
| 359 NA18980 | [2515685 chr11 | 11 | 18903451  | 18928671  | 25221  | 31  | 0.391258  | 0.029136 | 18897800  | 18906533  | 18928457  | 18928881  |
| 360 NA18980 | [2515685 chr11 | 11 | 28965605  | 28969186  | 3582   | 5   | 2.561452  | 0.149539 | 28965284  | 28965927  | 28968702  | 28969671  |
| 361 NA18980 | [2515685 chr11 | 11 | 34177434  | 34182598  | 5165   | 6   | -0.599014 | 0.066363 | 34177130  | 34177739  | 34182251  | 34182941  |
| 362 NA18980 | [2515685 chr11 | 11 | 48284073  | 48284771  | 699    | 2   | 1.054582  | 0.11544  | 48283862  | 48284285  | 48284572  | 48284971  |
| 363 NA18980 | [2515685 chr11 | 11 | 49665830  | 49712417  | 46588  | 35  | 0.42653   | 0.027535 | 49665251  | 49666410  | 49712087  | 49712741  |
| 364 NA18980 | [2515685 chr11 | 11 | 54974441  | 54979405  | 4965   | 3   | -0.484749 | 0.094843 | 54972670  | 54976212  | 54979178  | 54979637  |
| 365 NA18980 | [2515685 chr11 | 11 | 55124101  | 55212650  | 88550  | 99  | -0.757786 | 0.017009 | 55123742  | 55124460  | 55209568  | 55215751  |
| 366 NA18980 | [2515685 chr11 | 11 | 60722802  | 60777477  | 54676  | 72  | 0.549882  | 0.018941 | 60722435  | 60723170  | 60776810  | 60778141  |
| 367 NA18980 | [2515685 chr11 | 11 | 73815147  | 73818580  | 3434   | 3   | -0.602742 | 0.093074 | 73812981  | 73817313  | 73818213  | 73818947  |
| 368 NA18980 | [2515685 chr11 | 11 | 106744846 | 106746569 | 1724   | 5   | -0.813123 | 0.075096 | 106744561 | 106745131 | 106746367 | 106746777 |
| 369 NA18980 | [2515685 chr11 | 11 | 106747019 | 106751053 | 4035   | 3   | -0.650143 | 0.093565 | 106746772 | 106747267 | 106747971 | 106754837 |
| 370 NA18980 | [2515685 chr11 | 11 | 113979102 | 114010844 | 31743  | 47  | 0.345634  | 0.023283 | 113978897 | 113979308 | 114007762 | 114016987 |
| 371 NA18980 | [2515685 chr11 | 11 | 134107699 | 134112290 | 4592   | 5   | 0.928894  | 0.075027 | 134106591 | 134108808 | 134111845 | 134112737 |
| 372 NA18980 | [2515685 chr12 | 12 | 737326    | 744802    | 7477   | 8   | 1.021313  | 0.05822  | 737064    | 737588    | 744211    | 745394    |
| 373 NA18980 | [2515685 chr12 | 12 | 2112534   | 2127044   | 14511  | 15  | 0.691202  | 0.042973 | 2109107   | 2115961   | 2126809   | 2127271   |
| 374 NA18980 | [2515685 chr12 | 12 | 6110940   | 6118188   | 7249   | 5   | 0.527239  | 0.074588 | 6110241   | 6111640   | 61117816  | 61118567  |
| 375 NA18980 | [2515685 chr12 | 12 | 9524239   | 9610804   | 86566  | 94  | 0.653577  | 0.018067 | 9523968   | 9524510   | 9610082   | 9611526   |
| 376 NA18980 | [2515685 chr12 | 12 | 9618644   | 9624971   | 6328   | 6   | 0.460262  | 0.067357 | 9617716   | 9619573   | 9623223   | 9626720   |
| 377 NA18980 | [2515685 chr12 | 12 | 11398049  | 11463223  | 65175  | 66  | -0.380141 | 0.019792 | 11397507  | 11398591  | 11459990  | 11466457  |
| 378 NA18980 | [2515685 chr12 | 12 | 31166636  | 31244780  | 78145  | 74  | 0.326908  | 0.019188 | 31164617  | 31168656  | 31244217  | 31245347  |
| 379 NA18980 | [2515685 chr12 | 12 | 33859385  | 33870542  | 11158  | 11  | -0.323194 | 0.04911  | 33859257  | 33859514  | 33870727  | 33870727  |
| 380 NA18980 | [2515685 chr12 | 12 | 33985690  | 33986457  | 768    | 2   | -0.602423 | 0.116979 | 33985551  | 33985830  | 33986111  | 33986807  |
| 381 NA18980 | [2515685 chr12 | 12 | 34295301  | 34303590  | 8290   | 3   | -0.519611 | 0.095815 | 34294958  | 34295645  | 34303060  | 34304127  |
| 382 NA18980 | [2515685 chr12 | 12 | 36728958  | 36734369  | 5412   | 9   | 0.333388  | 0.053215 | 36728858  | 36729059  | 36734186  | 36734557  |
| 383 NA18980 | [2515685 chr12 | 12 | 36885642  | 36890395  | 4754   | 7   | -0.468415 | 0.060434 | 36885435  | 36885850  | 36887282  | 36893507  |
| 384 NA18980 | [2515685 chr12 | 12 | 37005122  | 37010756  | 5635   | 12  | -0.273871 | 0.048559 | 37005019  | 37005226  | 37009757  | 37011757  |
| 385 NA18980 | [2515685 chr12 | 12 | 70475445  | 70476812  | 1368   | 2   | -2.459622 | 0.15799  | 70475180  | 70475711  | 70476524  | 70477107  |
| 386 NA18980 | [2515685 chr12 | 12 | 96495473  | 96508249  | 12777  | 2   | -0.647142 | 0.122621 | 96433426  | 96498963  | 96506076  | 96510427  |
| 387 NA18980 | [2515685 chr12 | 12 | 128477315 | 128485248 | 7934   | 8   | -0.313032 | 0.056444 | 128477061 | 128477570 | 128484789 | 128485707 |
| 388 NA18980 | [2515685 chr12 | 12 | 128674958 | 128680908 | 5951   | 2   | -0.581344 | 0.113576 | 128674513 | 128675404 | 128680360 | 128681457 |
| 389 NA18980 | [2515685 chr12 | 12 | 129395501 | 129397120 | 1620   | 13  | 0.309497  | 0.044278 | 129395008 | 129395994 | 129397068 | 129397177 |
| 390 NA18980 | [2515685 chr12 | 12 | 130315291 | 130320068 | 4778   | 16  | 0.436873  | 0.040095 | 130315089 | 130315493 | 130319789 | 130320347 |
| 391 NA18980 | [2515685 chr12 | 12 | 130726464 | 130727891 | 1428   | 2   | 0.626988  | 0.112888 | 130726076 | 130726853 | 130727412 | 130728377 |
| 392 NA18980 | [2515685 chr12 | 12 | 130798727 | 130801060 | 2334   | 4   | -3.545795 | 0.150223 | 130798268 | 130799187 | 130800776 | 130801347 |
| 393 NA18980 | [2515685 chr13 | 13 | 25947233  | 25950398  | 3166   | 3   | 3.337534  | 0.15681  | 25946194  | 25948272  | 25949415  | 25951387  |
| 394 NA18980 | [2515685 chr13 | 13 | 33029570  | 33043421  | 13852  | 9   | 0.801186  | 0.056492 | 33000262  | 33034253  | 33042925  | 33043917  |
| 395 NA18980 | [2515685 chr13 | 13 | 36971484  | 36983475  | 11992  | 10  | -0.880884 | 0.054181 | 36969416  | 36973552  | 36982905  | 36984047  |
| 396 NA18980 | [2515685 chr13 | 13 | 56611711  | 56645734  | 34024  | 47  | -0.34439  | 0.023287 | 56610946  | 56612477  | 56645321  | 56646147  |
| 397 NA18980 | [2515685 chr13 | 13 | 69633905  | 69673289  | 39385  | 42  | 0.762787  | 0.025862 | 69633412  | 69634399  | 69672985  | 69673597  |
| 398 NA18980 | [2515685 chr13 | 13 | 82151369  | 82156983  | 5615   | 3   | -0.618908 | 0.102581 | 82150615  | 82152123  | 82156799  | 82157167  |
| 399 NA18980 | [2515685 chr13 | 13 | 109159999 | 109161199 | 1201   | 2   | -0.597902 | 0.116011 | 109159511 | 109160487 | 109160940 | 109161457 |
| 400 NA18980 | [2515685 chr13 | 13 | 110502383 | 110503129 | 747    | 3   | -0.8101   | 0.092172 | 110502225 | 110502541 | 110502890 | 110503336 |
| 401 NA18980 | [2515685 chr13 | 13 | 113078057 | 113086821 | 8765   | 4   | 0.801183  | 0.088874 | 113077224 | 113078890 | 113082138 | 113094347 |
| 402 NA18980 | [2515685 chr14 | 14 | 18437470  | 18818454  | 380985 | 602 | -0.490822 | 0.004311 | 18437443  | 18437497  | 18818043  | 18818867  |
| 403 NA18980 | [2515685 chr14 | 14 | 18869365  | 19272270  | 402906 | 708 | -0.490822 | 0.004311 | 18866159  | 18872572  | 19272065  | 19272477  |
| 404 NA18980 | [2515685 chr14 | 14 | 42059344  | 42062997  | 3654   | 2   | 0.912838  | 0.12169  | 42056485  | 42062203  | 42062601  | 42063397  |
| 405 NA18980 | [2515685 chr14 | 14 | 46003952  | 46005480  | 1529   | 2   | 0.670587  | 0.11646  | 46003423  | 46004481  | 46005073  | 46005887  |

|             |                |    |           |           |        |     |           |          |           |           |           |           |
|-------------|----------------|----|-----------|-----------|--------|-----|-----------|----------|-----------|-----------|-----------|-----------|
| 406 NA18980 | [2515685 chr14 | 14 | 73052083  | 73053781  | 1699   | 2   | -0.616014 | 0.112888 | 73051714  | 73052452  | 73052927  | 73054631  |
| 407 NA18980 | [2515685 chr14 | 14 | 73070288  | 73082987  | 12700  | 15  | -0.419887 | 0.045928 | 73068747  | 73071829  | 73082782  | 7308319:  |
| 408 NA18980 | [2515685 chr14 | 14 | 73102892  | 73111688  | 8797   | 7   | 0.453317  | 0.061748 | 73101149  | 73104635  | 73111320  | 7311205:  |
| 409 NA18980 | [2515685 chr15 | 15 | 18410351  | 18430991  | 20641  | 16  | 0.29726   | 0.039912 | 18410066  | 18410637  | 18430684  | 1843129:  |
| 410 NA18980 | [2515685 chr15 | 15 | 18458940  | 18468372  | 9433   | 6   | -0.360343 | 0.065194 | 18458212  | 18459669  | 18430684  | 1846887:  |
| 411 NA18980 | [2515685 chr15 | 15 | 18797904  | 18906667  | 108764 | 133 | -0.267745 | 0.004131 | 18796573  | 18799236  | 18906373  | 1890696:  |
| 412 NA18980 | [2515685 chr15 | 15 | 18931652  | 19616198  | 684547 | 935 | -0.267745 | 0.004131 | 18931502  | 18931803  | 19615799  | 1961659:  |
| 413 NA18980 | [2515685 chr15 | 15 | 19661791  | 20094950  | 433160 | 346 | -0.267745 | 0.004131 | 19661464  | 19662119  | 20092648  | 2019778:  |
| 414 NA18980 | [2515685 chr15 | 15 | 20865501  | 20867668  | 2168   | 4   | 0.509542  | 0.079825 | 20865204  | 20865798  | 20867431  | 2086790:  |
| 415 NA18980 | [2515685 chr15 | 15 | 20922386  | 20928928  | 6543   | 18  | -0.330045 | 0.037629 | 20922166  | 20922607  | 20928624  | 2092923:  |
| 416 NA18980 | [2515685 chr15 | 15 | 21049779  | 21065014  | 15236  | 16  | -0.388535 | 0.039988 | 21049217  | 21050342  | 21064818  | 2106521:  |
| 417 NA18980 | [2515685 chr15 | 15 | 21606753  | 21614600  | 7848   | 7   | 0.967545  | 0.071899 | 21606459  | 21607047  | 21612298  | 2163669:  |
| 418 NA18980 | [2515685 chr15 | 15 | 21892356  | 21892983  | 628    | 2   | -0.78321  | 0.122492 | 21892291  | 21892421  | 21892762  | 2189320:  |
| 419 NA18980 | [2515685 chr15 | 15 | 22059745  | 22090966  | 31222  | 37  | -0.252623 | 0.026367 | 22057403  | 22062047  | 22090382  | 2209155:  |
| 420 NA18980 | [2515685 chr15 | 15 | 22201500  | 22273082  | 71583  | 88  | -0.297368 | 0.017239 | 22201392  | 22201609  | 22272928  | 2227323:  |
| 421 NA18980 | [2515685 chr15 | 15 | 22658272  | 22662229  | 3958   | 3   | -1.002369 | 0.097959 | 22658051  | 22658494  | 22659927  | 2266949:  |
| 422 NA18980 | [2515685 chr15 | 15 | 24986053  | 24992250  | 6198   | 7   | 0.756541  | 0.062252 | 24985426  | 24986680  | 24991680  | 2499282:  |
| 423 NA18980 | [2515685 chr15 | 15 | 26135294  | 26137335  | 2042   | 4   | 0.519814  | 0.079823 | 26134997  | 26135591  | 26137216  | 2613745:  |
| 424 NA18980 | [2515685 chr15 | 15 | 26237166  | 26244414  | 7249   | 11  | -0.263388 | 0.048135 | 26236894  | 26237439  | 26244069  | 2624475:  |
| 425 NA18980 | [2515685 chr15 | 15 | 26331076  | 26345610  | 14535  | 27  | -0.274924 | 0.030724 | 26330888  | 26331265  | 26345348  | 2634587:  |
| 426 NA18980 | [2515685 chr15 | 15 | 26530354  | 26544110  | 13757  | 20  | -0.253486 | 0.035698 | 26529150  | 26531559  | 26543922  | 2654429:  |
| 427 NA18980 | [2515685 chr15 | 15 | 26628127  | 26656714  | 28588  | 58  | -0.262691 | 0.020997 | 26627992  | 26628262  | 26656582  | 2665684:  |
| 428 NA18980 | [2515685 chr15 | 15 | 26695549  | 26697710  | 2162   | 4   | 0.46679   | 0.079823 | 26695312  | 26695786  | 26697414  | 2669800:  |
| 429 NA18980 | [2515685 chr15 | 15 | 27071751  | 27072556  | 806    | 2   | -0.602551 | 0.115298 | 27071575  | 27071928  | 27072336  | 2707277:  |
| 430 NA18980 | [2515685 chr15 | 15 | 32448271  | 32455403  | 7133   | 5   | 0.388855  | 0.071948 | 32447734  | 32448809  | 32454322  | 3245648:  |
| 431 NA18980 | [2515685 chr15 | 15 | 32470141  | 32598425  | 128285 | 121 | 0.34404   | 0.011766 | 32469858  | 32470425  | 32597169  | 3259968:  |
| 432 NA18980 | [2515685 chr15 | 15 | 32616362  | 32656877  | 40516  | 47  | 0.34404   | 0.011766 | 32616079  | 32616646  | 32656150  | 3265760:  |
| 433 NA18980 | [2515685 chr15 | 15 | 59490762  | 59495993  | 5232   | 2   | -0.604232 | 0.112888 | 59490146  | 59491378  | 59494114  | 5949787:  |
| 434 NA18980 | [2515685 chr15 | 15 | 75117585  | 75119946  | 2362   | 4   | -1.594577 | 0.121801 | 75117343  | 75117827  | 75119741  | 7512015:  |
| 435 NA18980 | [2515685 chr15 | 15 | 82869849  | 82880155  | 10307  | 4   | -0.495371 | 0.080248 | 82860467  | 82872151  | 82877853  | 8289101:  |
| 436 NA18980 | [2515685 chr15 | 15 | 83685983  | 83688723  | 2741   | 2   | -0.601419 | 0.11509  | 83684729  | 83687238  | 83687705  | 8368974:  |
| 437 NA18980 | [2515685 chr15 | 15 | 98234084  | 98240716  | 6633   | 8   | 0.752722  | 0.06357  | 98233842  | 98234327  | 98239350  | 9824208:  |
| 438 NA18980 | [2515685 chr15 | 15 | 100109640 | 100122682 | 13043  | 98  | 0.763507  | 0.016127 | 100108905 | 100110376 | 100122315 | 10012305: |
| 439 NA18980 | [2515685 chr16 | 16 | 680715    | 690844    | 10130  | 12  | 0.286729  | 0.046086 | 680469    | 680962    | 690519    | 691165:   |
| 440 NA18980 | [2515685 chr16 | 16 | 946002    | 948831    | 2830   | 2   | -0.764569 | 0.116469 | 945660    | 946345    | 947314    | 950345:   |
| 441 NA18980 | [2515685 chr16 | 16 | 14896194  | 14908521  | 12328  | 31  | -0.273979 | 0.028674 | 14896075  | 14896314  | 14908433  | 1490860:  |
| 442 NA18980 | [2515685 chr16 | 16 | 14955818  | 15030359  | 74542  | 68  | -0.573262 | 0.019558 | 14955356  | 14956281  | 15029969  | 1503075:  |
| 443 NA18980 | [2515685 chr16 | 16 | 16294885  | 16307174  | 12290  | 27  | -0.256653 | 0.030724 | 16294729  | 16295041  | 16307086  | 1630726:  |
| 444 NA18980 | [2515685 chr16 | 16 | 16577582  | 16587188  | 9607   | 5   | 0.367242  | 0.071748 | 16576575  | 16578590  | 16586675  | 1658770:  |
| 445 NA18980 | [2515685 chr16 | 16 | 16633469  | 16639120  | 5652   | 4   | 0.77447   | 0.081168 | 16632502  | 16634437  | 16638386  | 1663985:  |
| 446 NA18980 | [2515685 chr16 | 16 | 18407671  | 18419965  | 12295  | 27  | -0.256653 | 0.030724 | 18407583  | 18407760  | 18419809  | 1842012:  |
| 447 NA18980 | [2515685 chr16 | 16 | 21442959  | 21502620  | 59662  | 53  | 0.267446  | 0.021955 | 21442603  | 21443315  | 21501101  | 2150414:  |
| 448 NA18980 | [2515685 chr16 | 16 | 22522128  | 22618743  | 96616  | 83  | 0.276101  | 0.017563 | 22521878  | 22522378  | 22617181  | 2262030:  |
| 449 NA18980 | [2515685 chr16 | 16 | 31870268  | 32000286  | 130019 | 197 | 0.258606  | 0.011377 | 31870008  | 31870528  | 32000139  | 3200043:  |
| 450 NA18980 | [2515685 chr16 | 16 | 32069391  | 32150890  | 81500  | 208 | 0.329927  | 0.011081 | 32068163  | 32070620  | 32150057  | 3215172:  |
| 451 NA18980 | [2515685 chr16 | 16 | 32159898  | 32160377  | 480    | 2   | -1.641242 | 0.1203   | 32159453  | 32160343  | 32160346  | 3216040:  |
| 452 NA18980 | [2515685 chr16 | 16 | 32203465  | 32219640  | 16176  | 30  | 0.38295   | 0.029152 | 32200681  | 32205345  | 32219531  | 3221974:  |
| 453 NA18980 | [2515685 chr16 | 16 | 32479457  | 32553240  | 73784  | 75  | 0.390132  | 0.018633 | 32400448  | 32481337  | 32553051  | 3255343:  |
| 454 NA18980 | [2515685 chr16 | 16 | 32606692  | 32607163  | 472    | 2   | -1.641216 | 0.120299 | 32606661  | 32606724  | 32606727  | 3260759:  |
| 455 NA18980 | [2515685 chr16 | 16 | 32616183  | 32693413  | 77231  | 211 | 0.320773  | 0.011    | 32615350  | 32617017  | 32693266  | 3269356:  |
| 456 NA18980 | [2515685 chr16 | 16 | 32774701  | 32943805  | 169105 | 246 | 0.275118  | 0.01018  | 32774586  | 32774817  | 32943392  | 3294421:  |
| 457 NA18980 | [2515685 chr16 | 16 | 33014541  | 33091854  | 77314  | 211 | 0.320808  | 0.010999 | 33014308  | 33014775  | 33091021  | 3309268:  |
| 458 NA18980 | [2515685 chr16 | 16 | 33100875  | 33101346  | 472    | 2   | -1.641268 | 0.120301 | 33100438  | 33101312  | 33101315  | 3310137:  |
| 459 NA18980 | [2515685 chr16 | 16 | 33157406  | 33157879  | 474    | 2   | -1.641229 | 0.120299 | 33156967  | 33157845  | 33157848  | 3315791:  |
| 460 NA18980 | [2515685 chr16 | 16 | 33201519  | 33217055  | 15537  | 28  | 0.412079  | 0.03017  | 33197841  | 33203399  | 33216946  | 3321716:  |

|             |                |    |          |          |        |     |           |          |          |          |          |          |
|-------------|----------------|----|----------|----------|--------|-----|-----------|----------|----------|----------|----------|----------|
| 461 NA18980 | [2515685 chr16 | 16 | 33323229 | 33337262 | 14034  | 21  | 0.291193  | 0.034838 | 33323089 | 33323370 | 33336653 | 3333787: |
| 462 NA18980 | [2515685 chr16 | 16 | 33392689 | 33397742 | 5054   | 10  | 0.44726   | 0.050539 | 33392062 | 33393316 | 33397495 | 3339799: |
| 463 NA18980 | [2515685 chr16 | 16 | 33495147 | 33715627 | 220481 | 301 | 0.290234  | 0.009215 | 33494765 | 33495529 | 33715511 | 3371574: |
| 464 NA18980 | [2515685 chr16 | 16 | 33858110 | 33872679 | 14570  | 11  | 0.391264  | 0.048415 | 33852692 | 33859990 | 33871847 | 3387351: |
| 465 NA18980 | [2515685 chr16 | 16 | 34326899 | 34342005 | 15107  | 25  | -0.468434 | 0.009328 | 34326619 | 34327179 | 34341760 | 3434225: |
| 466 NA18980 | [2515685 chr16 | 16 | 34343871 | 34592634 | 248764 | 265 | -0.468434 | 0.009328 | 34343515 | 34344228 | 34592388 | 3459288: |
| 467 NA18980 | [2515685 chr16 | 16 | 34594834 | 34597593 | 2760   | 5   | -0.468434 | 0.009328 | 34594693 | 34594976 | 34597356 | 3459783: |
| 468 NA18980 | [2515685 chr16 | 16 | 54353711 | 54360305 | 6595   | 8   | -0.867743 | 0.065627 | 54353419 | 54354004 | 54359570 | 5436104: |
| 469 NA18980 | [2515685 chr16 | 16 | 54365075 | 54369383 | 4309   | 6   | -1.909746 | 0.077422 | 54364721 | 54365430 | 54368899 | 5436986: |
| 470 NA18980 | [2515685 chr16 | 16 | 54399675 | 54418818 | 19144  | 25  | 0.45543   | 0.032151 | 54399445 | 54399906 | 54417970 | 5441966: |
| 471 NA18980 | [2515685 chr16 | 16 | 57204541 | 57207585 | 3045   | 3   | 4.539537  | 0.183557 | 57204170 | 57204913 | 57206938 | 5720823: |
| 472 NA18980 | [2515685 chr16 | 16 | 68603179 | 68666721 | 63543  | 58  | -0.395448 | 0.020975 | 68602755 | 68603604 | 68666385 | 6866705: |
| 473 NA18980 | [2515685 chr16 | 16 | 76930776 | 76942282 | 11507  | 9   | 0.682369  | 0.054041 | 76930290 | 76931263 | 76941602 | 7694296: |
| 474 NA18980 | [2515685 chr16 | 16 | 88173073 | 88174748 | 1676   | 3   | 0.600141  | 0.092172 | 88172794 | 88173352 | 88174105 | 8817539: |
| 475 NA18980 | [2515685 chr16 | 16 | 88710612 | 88712467 | 1856   | 10  | 0.288931  | 0.050485 | 88710473 | 88710751 | 88712408 | 8871252: |
| 476 NA18980 | [2515685 chr17 | 17 | 966845   | 969578   | 2734   | 21  | 0.846555  | 0.035964 | 966537   | 967154   | 969378   | 969775:  |
| 477 NA18980 | [2515685 chr17 | 17 | 1547017  | 1631956  | 84940  | 2   | -0.594157 | 0.114123 | 1503472  | 1549217  | 1629756  | 167903:  |
| 478 NA18980 | [2515685 chr17 | 17 | 16664409 | 16665630 | 1222   | 2   | -0.835693 | 0.116659 | 16664175 | 16664643 | 16665353 | 1666590: |
| 479 NA18980 | [2515685 chr17 | 17 | 18296513 | 18345127 | 48615  | 79  | 0.325155  | 0.018003 | 18296246 | 18296781 | 18345008 | 1834524: |
| 480 NA18980 | [2515685 chr17 | 17 | 20287216 | 20335856 | 48641  | 77  | 0.290327  | 0.018225 | 20287005 | 20287427 | 20335559 | 2033615: |
| 481 NA18980 | [2515685 chr17 | 17 | 21367678 | 21368662 | 985    | 2   | -0.599147 | 0.118907 | 21367333 | 21368023 | 21368503 | 2136882: |
| 482 NA18980 | [2515685 chr17 | 17 | 21825576 | 21837994 | 12419  | 9   | 0.30963   | 0.053216 | 21824915 | 21826238 | 21835794 | 2184235: |
| 483 NA18980 | [2515685 chr17 | 17 | 31430406 | 31603400 | 172995 | 269 | 0.34868   | 0.006339 | 31429658 | 31431155 | 31603237 | 3160356: |
| 484 NA18980 | [2515685 chr17 | 17 | 31614953 | 31818434 | 203482 | 179 | 0.34868   | 0.006339 | 31614875 | 31615032 | 31818271 | 3181859: |
| 485 NA18980 | [2515685 chr17 | 17 | 31827955 | 31869486 | 41532  | 65  | 0.34868   | 0.006339 | 31827754 | 31828157 | 31869323 | 3186965: |
| 486 NA18980 | [2515685 chr17 | 17 | 31881017 | 31888495 | 7479   | 21  | 0.34868   | 0.006339 | 31880939 | 31881096 | 31888204 | 3188878: |
| 487 NA18980 | [2515685 chr17 | 17 | 32829500 | 32833231 | 3732   | 5   | 0.979166  | 0.075203 | 32828825 | 32830175 | 32832670 | 3283379: |
| 488 NA18980 | [2515685 chr17 | 17 | 33324385 | 33382224 | 57840  | 118 | 0.32255   | 0.014701 | 33323841 | 33324930 | 33381884 | 3338256: |
| 489 NA18980 | [2515685 chr17 | 17 | 33395919 | 33408561 | 12643  | 10  | -0.744872 | 0.0513   | 33395884 | 33395955 | 33408077 | 3340904: |
| 490 NA18980 | [2515685 chr17 | 17 | 33425145 | 33430791 | 5647   | 10  | -0.661686 | 0.051027 | 33424532 | 33425759 | 33428591 | 3352929: |
| 491 NA18980 | [2515685 chr17 | 17 | 33529907 | 33639547 | 109641 | 202 | 0.329178  | 0.011237 | 33529840 | 33529975 | 33638405 | 3364068: |
| 492 NA18980 | [2515685 chr17 | 17 | 33641281 | 33659558 | 18278  | 30  | -0.680959 | 0.029718 | 33640689 | 33641874 | 33658997 | 3366011: |
| 493 NA18980 | [2515685 chr17 | 17 | 36675530 | 36685343 | 9814   | 10  | -0.711116 | 0.053374 | 36675011 | 36676049 | 36684647 | 3668604: |
| 494 NA18980 | [2515685 chr17 | 17 | 36993884 | 36995674 | 1791   | 2   | -0.631897 | 0.112888 | 36993311 | 36994458 | 36995333 | 3699601: |
| 495 NA18980 | [2515685 chr17 | 17 | 40928267 | 41006614 | 78348  | 125 | 0.279889  | 0.014279 | 40927895 | 40928640 | 41006215 | 4100701: |
| 496 NA18980 | [2515685 chr17 | 17 | 41724965 | 41746006 | 21042  | 49  | 0.266211  | 0.022807 | 41724205 | 41725726 | 41745903 | 4174610: |
| 497 NA18980 | [2515685 chr17 | 17 | 41747612 | 42137410 | 389799 | 430 | 0.595615  | 0.007716 | 41747392 | 41747832 | 42135210 | 4214194: |
| 498 NA18980 | [2515685 chr17 | 17 | 42444725 | 42488850 | 44126  | 72  | 0.294358  | 0.018816 | 42443303 | 42446148 | 42487442 | 4249025: |
| 499 NA18980 | [2515685 chr17 | 17 | 42905976 | 42908985 | 3010   | 2   | 0.679354  | 0.118383 | 42905585 | 42906368 | 42906957 | 4291101: |
| 500 NA18980 | [2515685 chr17 | 17 | 42970703 | 42988804 | 18102  | 32  | -0.642274 | 0.028513 | 42970185 | 42971221 | 42988208 | 4298940: |
| 501 NA18980 | [2515685 chr17 | 17 | 42988804 | 43026670 | 37867  | 54  | 0.46493   | 0.02178  | 42988208 | 42989400 | 43025568 | 4302777: |
| 502 NA18980 | [2515685 chr17 | 17 | 48509183 | 48510342 | 1160   | 2   | -0.605399 | 0.118296 | 48508969 | 48509398 | 48509953 | 4851073: |
| 503 NA18980 | [2515685 chr17 | 17 | 55434888 | 55436772 | 1885   | 2   | -0.602033 | 0.112887 | 55434445 | 55435332 | 55436212 | 5543733: |
| 504 NA18980 | [2515685 chr17 | 17 | 55806252 | 55811196 | 4945   | 2   | -0.819188 | 0.114661 | 55687363 | 55808452 | 55808996 | 5582897: |
| 505 NA18980 | [2515685 chr17 | 17 | 57684203 | 57695311 | 11109  | 22  | 0.434581  | 0.034047 | 57683826 | 57684581 | 57694888 | 5769573: |
| 506 NA18980 | [2515685 chr17 | 17 | 60269002 | 60346613 | 77612  | 119 | 0.262168  | 0.014635 | 60268357 | 60269648 | 60345268 | 6034795: |
| 507 NA18980 | [2515685 chr18 | 18 | 14726980 | 14736224 | 9245   | 13  | 0.254681  | 0.044278 | 14726667 | 14727294 | 14735973 | 1473647: |
| 508 NA18980 | [2515685 chr18 | 18 | 14833046 | 14841696 | 8651   | 8   | -0.302252 | 0.058087 | 14832691 | 14833401 | 14841470 | 1484192: |
| 509 NA18980 | [2515685 chr18 | 18 | 28142218 | 28143399 | 1182   | 2   | 0.874008  | 0.12712  | 28141854 | 28142583 | 28143055 | 2814374: |
| 510 NA18980 | [2515685 chr18 | 18 | 36514289 | 36521090 | 6802   | 6   | -0.840014 | 0.068701 | 36513759 | 36514820 | 36520512 | 3652166: |
| 511 NA18980 | [2515685 chr18 | 18 | 63110008 | 63115099 | 5092   | 7   | -0.815571 | 0.06378  | 63109644 | 63110373 | 63114764 | 6311543: |
| 512 NA18980 | [2515685 chr18 | 18 | 64349749 | 64360436 | 10688  | 10  | 0.323294  | 0.050594 | 64349207 | 64350291 | 64359750 | 6436112: |
| 513 NA18980 | [2515685 chr18 | 18 | 64896052 | 64906913 | 10862  | 12  | -0.854051 | 0.049142 | 64894789 | 64897315 | 64906598 | 6490722: |
| 514 NA18980 | [2515685 chr18 | 18 | 74345770 | 74347966 | 2197   | 5   | 0.396852  | 0.071396 | 74345318 | 74346223 | 74347677 | 7434825: |
| 515 NA18980 | [2515685 chr18 | 18 | 74373005 | 74376367 | 3363   | 7   | 0.606689  | 0.060341 | 74372064 | 74373947 | 74375833 | 7437690: |

|             |                |    |          |          |        |     |           |          |          |          |          |          |
|-------------|----------------|----|----------|----------|--------|-----|-----------|----------|----------|----------|----------|----------|
| 516 NA18980 | [2515685 chr18 | 18 | 74392800 | 74398225 | 5426   | 4   | 0.687761  | 0.088474 | 74390826 | 74394774 | 74397790 | 74398661 |
| 517 NA18980 | [2515685 chr19 | 19 | 219435   | 224186   | 4752   | 10  | 0.389481  | 0.050485 | 217988   | 220882   | 222040   | 226332   |
| 518 NA18980 | [2515685 chr19 | 19 | 252671   | 255224   | 2554   | 8   | 0.335144  | 0.056444 | 251836   | 253507   | 254742   | 255707   |
| 519 NA18980 | [2515685 chr19 | 19 | 274182   | 276410   | 2229   | 3   | 0.504157  | 0.092172 | 273796   | 274569   | 276173   | 276648   |
| 520 NA18980 | [2515685 chr19 | 19 | 310414   | 314479   | 4066   | 15  | -0.482719 | 0.04122  | 309687   | 311142   | 312994   | 315964   |
| 521 NA18980 | [2515685 chr19 | 19 | 8707491  | 8763535  | 56045  | 95  | 0.633882  | 0.016408 | 8706686  | 8708296  | 8763160  | 8763917  |
| 522 NA18980 | [2515685 chr19 | 19 | 22149890 | 22153327 | 3438   | 9   | -0.348185 | 0.05724  | 22149803 | 22149977 | 22153114 | 22153541 |
| 523 NA18980 | [2515685 chr19 | 19 | 23007902 | 23016040 | 8139   | 9   | 0.548159  | 0.055535 | 22990964 | 23010431 | 23015670 | 23016417 |
| 524 NA18980 | [2515685 chr19 | 19 | 23108259 | 23109446 | 1188   | 2   | -0.675439 | 0.128396 | 23107903 | 23108615 | 23108879 | 23110014 |
| 525 NA18980 | [2515685 chr19 | 19 | 39419234 | 39422498 | 3265   | 5   | 0.547031  | 0.072461 | 39418853 | 39419616 | 39421681 | 39423311 |
| 526 NA18980 | [2515685 chr19 | 19 | 43974792 | 43977294 | 2503   | 2   | -0.693396 | 0.116872 | 43974369 | 43975216 | 43975620 | 43978961 |
| 527 NA18980 | [2515685 chr19 | 19 | 48406765 | 48455659 | 48895  | 30  | -0.285654 | 0.029416 | 48406231 | 48407299 | 48455286 | 48456031 |
| 528 NA18980 | [2515685 chr19 | 19 | 56827216 | 56840752 | 13537  | 13  | -0.599423 | 0.045037 | 56826331 | 56828101 | 56840372 | 56841131 |
| 529 NA18980 | [2515685 chr19 | 19 | 56900830 | 56912964 | 12135  | 8   | 0.287083  | 0.056597 | 56900267 | 56901393 | 56912374 | 56913551 |
| 530 NA18980 | [2515685 chr19 | 19 | 58169057 | 58174458 | 5402   | 5   | 0.365286  | 0.071396 | 58168791 | 58169324 | 58174133 | 58174781 |
| 531 NA18980 | [2515685 chr19 | 19 | 58210435 | 58244458 | 34024  | 26  | -0.750823 | 0.032248 | 58209863 | 58211007 | 58243893 | 58245021 |
| 532 NA18980 | [2515685 chr19 | 19 | 59249340 | 59252061 | 2722   | 4   | 1.023001  | 0.083214 | 59249084 | 59249597 | 59251854 | 59252261 |
| 533 NA18980 | [2515685 chr19 | 19 | 59420921 | 59435274 | 14354  | 17  | -0.500678 | 0.038963 | 59420489 | 59421354 | 59435027 | 59435521 |
| 534 NA18980 | [2515685 chr20 | 20 | 2303224  | 2304570  | 1347   | 2   | -0.615041 | 0.120353 | 2302920  | 2303529  | 2304375  | 2304761  |
| 535 NA18980 | [2515685 chr20 | 20 | 26147289 | 26161501 | 14213  | 24  | -0.280487 | 0.032588 | 26147127 | 26147451 | 26161227 | 26161771 |
| 536 NA18980 | [2515685 chr20 | 20 | 55665052 | 55674342 | 9291   | 12  | 0.265383  | 0.046606 | 55664589 | 55665515 | 55674060 | 55674621 |
| 537 NA18980 | [2515685 chr20 | 20 | 59951513 | 59957050 | 5538   | 18  | 0.648579  | 0.037761 | 59950681 | 59952345 | 59956538 | 59957561 |
| 538 NA18980 | [2515685 chr20 | 20 | 62066380 | 62068214 | 1835   | 8   | 1.729178  | 0.065451 | 62066146 | 62066615 | 62067671 | 62068751 |
| 539 NA18980 | [2515685 chr20 | 20 | 62113559 | 62114878 | 1320   | 18  | 0.292092  | 0.037629 | 62113491 | 62113628 | 62114687 | 62115071 |
| 540 NA18980 | [2515685 chr20 | 20 | 62233505 | 62235897 | 2393   | 4   | 0.660782  | 0.079823 | 62232847 | 62234163 | 62235101 | 62236691 |
| 541 NA18980 | [2515685 chr21 | 21 | 10116197 | 10129765 | 13569  | 7   | -0.342379 | 0.060341 | 10115982 | 10116412 | 10128450 | 10131081 |
| 542 NA18980 | [2515685 chr21 | 21 | 13905235 | 14000261 | 95027  | 133 | -0.286032 | 0.013913 | 13904937 | 13905534 | 13999810 | 14000711 |
| 543 NA18980 | [2515685 chr21 | 21 | 14201202 | 14208307 | 7106   | 8   | -0.289195 | 0.056444 | 14200831 | 14201573 | 14208275 | 14208331 |
| 544 NA18980 | [2515685 chr22 | 22 | 14474806 | 14830910 | 356105 | 662 | -0.510853 | 0.006238 | 14474622 | 14474991 | 14830451 | 14831361 |
| 545 NA18980 | [2515685 chr22 | 22 | 18744519 | 18850813 | 106295 | 128 | -0.346725 | 0.014161 | 18742262 | 18746777 | 18850533 | 18851091 |
| 546 NA18980 | [2515685 chr22 | 22 | 19005982 | 19007302 | 1321   | 3   | -0.487422 | 0.095564 | 19005977 | 19005987 | 19006845 | 19007751 |
| 547 NA18980 | [2515685 chr22 | 22 | 19392079 | 19452600 | 60522  | 9   | -0.490313 | 0.053532 | 19391751 | 19392407 | 19449920 | 19568521 |
| 548 NA18980 | [2515685 chr22 | 22 | 19918242 | 19952782 | 34541  | 53  | 0.271382  | 0.021933 | 19917963 | 19918522 | 19952473 | 19953091 |
| 549 NA18980 | [2515685 chr22 | 22 | 20035865 | 20042869 | 7005   | 11  | -0.293808 | 0.009156 | 20035446 | 20036284 | 20042584 | 20043151 |
| 550 NA18980 | [2515685 chr22 | 22 | 20047736 | 20121462 | 73727  | 117 | -0.293808 | 0.009156 | 20047456 | 20048017 | 20121376 | 20121541 |
| 551 NA18980 | [2515685 chr22 | 22 | 20137248 | 20304962 | 167715 | 149 | -0.293808 | 0.009156 | 20136561 | 20137935 | 20302282 | 20353291 |
| 552 NA18980 | [2515685 chr22 | 22 | 22611178 | 22657508 | 46331  | 85  | -0.295168 | 0.017427 | 22609725 | 22612631 | 22657484 | 22657531 |
| 553 NA18980 | [2515685 chr22 | 22 | 22672624 | 22677557 | 4934   | 7   | 1.03714   | 0.070911 | 22672391 | 22672858 | 22677005 | 22678111 |
| 554 NA18980 | [2515685 chr22 | 22 | 22678229 | 22683930 | 5702   | 2   | 0.582213  | 0.115152 | 22678110 | 22678349 | 22681309 | 22686551 |
| 555 NA18980 | [2515685 chr22 | 22 | 22683930 | 22688523 | 4594   | 3   | -0.553412 | 0.093258 | 22681309 | 22686552 | 22687378 | 22689661 |
| 556 NA18980 | [2515685 chr22 | 22 | 22690382 | 22691501 | 1120   | 2   | 1.537265  | 0.125328 | 22690146 | 22690619 | 22691088 | 22691911 |
| 557 NA18980 | [2515685 chr22 | 22 | 22695407 | 22715094 | 19688  | 24  | 1.090123  | 0.039142 | 22695112 | 22695703 | 22714777 | 22715417 |
| 558 NA18980 | [2515685 chr22 | 22 | 33619409 | 33623490 | 4082   | 5   | 0.849202  | 0.071698 | 33618939 | 33619879 | 33622642 | 33624331 |
| 559 NA18980 | [2515685 chr22 | 22 | 37618794 | 37624011 | 5218   | 7   | -1.006489 | 0.069215 | 37618728 | 37618860 | 37621331 | 37627051 |
| 560 NA18980 | [2515685 chr22 | 22 | 41221878 | 41278526 | 56649  | 50  | 0.294156  | 0.022611 | 41221211 | 41222545 | 41278339 | 41278711 |
| 561 NA18980 | [2515685 chr22 | 22 | 43964828 | 44230076 | 265249 | 246 | 0.425792  | 0.010265 | 43964294 | 43965363 | 44229603 | 44230541 |
| 1 NA19132   | [2515685 chr1  | 1  | 11100    | 18210    | 7111   | 15  | 0.292694  | 0.045423 | 10927    | 11274    | 17980    | 18440    |
| 2 NA19132   | [2515685 chr1  | 1  | 20340    | 80231    | 59892  | 83  | 0.511169  | 0.019315 | 20153    | 20527    | 79974    | 80489    |
| 3 NA19132   | [2515685 chr1  | 1  | 586558   | 587572   | 1015   | 5   | 0.415078  | 0.078674 | 586293   | 586824   | 587344   | 587800   |
| 4 NA19132   | [2515685 chr1  | 1  | 601045   | 612159   | 11115  | 8   | -0.770229 | 0.062197 | 587801   | 604315   | 610122   | 614196   |
| 5 NA19132   | [2515685 chr1  | 1  | 10304191 | 10312662 | 8472   | 7   | -0.700315 | 0.068177 | 10303236 | 10305146 | 10312212 | 10313111 |
| 6 NA19132   | [2515685 chr1  | 1  | 10416438 | 10418311 | 1874   | 2   | -0.753001 | 0.124395 | 10415863 | 10417014 | 10417712 | 10418917 |
| 7 NA19132   | [2515685 chr1  | 1  | 12826783 | 12855019 | 28237  | 47  | 0.300952  | 0.025661 | 12826392 | 12827175 | 12854828 | 12855211 |
| 8 NA19132   | [2515685 chr1  | 1  | 12884744 | 12886858 | 2115   | 3   | 0.618387  | 0.101568 | 12884434 | 12885054 | 12886536 | 12887181 |
| 9 NA19132   | [2515685 chr1  | 1  | 13159940 | 13162071 | 2132   | 3   | 0.631463  | 0.101568 | 13159618 | 13160263 | 13161777 | 13162361 |

|            |               |   |           |           |        |    |           |          |           |           |           |           |
|------------|---------------|---|-----------|-----------|--------|----|-----------|----------|-----------|-----------|-----------|-----------|
| 10 NA19132 | [2515685 chr1 | 1 | 13380737  | 13382868  | 2132   | 3  | 0.631463  | 0.101568 | 13380415  | 13381060  | 13382574  | 1338316:  |
| 11 NA19132 | [2515685 chr1 | 1 | 57265788  | 57270431  | 4644   | 4  | 0.478432  | 0.08796  | 57264976  | 57266601  | 57269732  | 5727113   |
| 12 NA19132 | [2515685 chr1 | 1 | 62147249  | 62164151  | 16903  | 15 | -0.737656 | 0.045785 | 62145925  | 62148574  | 62163078  | 6216522!  |
| 13 NA19132 | [2515685 chr1 | 1 | 72478372  | 72524180  | 45809  | 36 | 0.804203  | 0.030295 | 72478140  | 72478604  | 72523661  | 7252470!  |
| 14 NA19132 | [2515685 chr1 | 1 | 73392642  | 73424207  | 31566  | 36 | 0.392149  | 0.029687 | 73392362  | 73392922  | 73424044  | 7342437   |
| 15 NA19132 | [2515685 chr1 | 1 | 89188689  | 89189555  | 867    | 2  | 3.852794  | 0.243032 | 89188470  | 89188908  | 89189310  | 8918980   |
| 16 NA19132 | [2515685 chr1 | 1 | 103857696 | 103868531 | 10836  | 13 | -0.335447 | 0.048791 | 103857666 | 103857727 | 103868296 | 10386876  |
| 17 NA19132 | [2515685 chr1 | 1 | 103919029 | 103931069 | 12041  | 15 | -0.337632 | 0.045617 | 103919019 | 103919040 | 103931039 | 10393110  |
| 18 NA19132 | [2515685 chr1 | 1 | 104126937 | 104133438 | 6502   | 4  | -0.822613 | 0.08796  | 104114124 | 104130207 | 104131797 | 10413508  |
| 19 NA19132 | [2515685 chr1 | 1 | 105684888 | 105706636 | 21749  | 7  | -0.359037 | 0.069415 | 105682701 | 105687076 | 105706252 | 10570702! |
| 20 NA19132 | [2515685 chr1 | 1 | 105728161 | 105735462 | 7302   | 8  | -0.870743 | 0.065119 | 105727820 | 105728503 | 105734532 | 10573639  |
| 21 NA19132 | [2515685 chr1 | 1 | 108444641 | 108449550 | 4910   | 9  | 0.790145  | 0.05904  | 108443817 | 108445466 | 108449224 | 10844987  |
| 22 NA19132 | [2515685 chr1 | 1 | 109934024 | 109965726 | 31703  | 35 | 0.510988  | 0.030019 | 109933789 | 109934260 | 109965065 | 10996638  |
| 23 NA19132 | [2515685 chr1 | 1 | 112405902 | 112416691 | 10790  | 10 | 0.713047  | 0.0558   | 112405415 | 112406389 | 112416423 | 11241696  |
| 24 NA19132 | [2515685 chr1 | 1 | 116873337 | 116915240 | 41904  | 52 | 0.477381  | 0.024396 | 116872766 | 116873908 | 116914887 | 11691559  |
| 25 NA19132 | [2515685 chr1 | 1 | 120517029 | 120517309 | 281    | 9  | 0.356741  | 0.05864  | 120517024 | 120517034 | 120517267 | 12051735  |
| 26 NA19132 | [2515685 chr1 | 1 | 120524033 | 120524155 | 123    | 2  | -0.626314 | 0.124395 | 120523991 | 120524075 | 120524093 | 12052421. |
| 27 NA19132 | [2515685 chr1 | 1 | 120527037 | 120529698 | 2662   | 40 | 0.295847  | 0.027815 | 120527013 | 120527062 | 120529686 | 12052971! |
| 28 NA19132 | [2515685 chr1 | 1 | 141390474 | 141393247 | 2774   | 56 | 0.29646   | 0.023508 | 141390462 | 141390486 | 141393185 | 14139331! |
| 29 NA19132 | [2515685 chr1 | 1 | 141396026 | 141396142 | 117    | 2  | -0.626311 | 0.124395 | 141395971 | 141396082 | 141396101 | 14139618  |
| 30 NA19132 | [2515685 chr1 | 1 | 141398531 | 141399546 | 1016   | 10 | 0.345434  | 0.055631 | 141398510 | 141398553 | 141399512 | 14139958  |
| 31 NA19132 | [2515685 chr1 | 1 | 141402840 | 141403151 | 312    | 11 | 0.369002  | 0.053042 | 141402828 | 141402852 | 141403146 | 14140315  |
| 32 NA19132 | [2515685 chr1 | 1 | 141975417 | 141976368 | 952    | 5  | 0.56145   | 0.078674 | 141975202 | 141975633 | 141976195 | 14197654  |
| 33 NA19132 | [2515685 chr1 | 1 | 145385031 | 145390189 | 5159   | 11 | 0.329092  | 0.053042 | 145385026 | 145385037 | 145389926 | 14539045  |
| 34 NA19132 | [2515685 chr1 | 1 | 145547059 | 145552218 | 5160   | 12 | 0.344713  | 0.050784 | 145547054 | 145547065 | 145551955 | 14555248  |
| 35 NA19132 | [2515685 chr1 | 1 | 145817307 | 145839481 | 22175  | 28 | 0.375421  | 0.033246 | 145817187 | 145817427 | 145839093 | 14583986  |
| 36 NA19132 | [2515685 chr1 | 1 | 145931108 | 145941849 | 10742  | 13 | 0.585347  | 0.048792 | 145930472 | 145931745 | 145941638 | 14594206  |
| 37 NA19132 | [2515685 chr1 | 1 | 146808546 | 146809451 | 906    | 2  | -0.737743 | 0.124394 | 146808090 | 146809003 | 146809142 | 14680976  |
| 38 NA19132 | [2515685 chr1 | 1 | 149368571 | 149401669 | 33099  | 23 | 0.728795  | 0.036712 | 149368105 | 149369038 | 149399791 | 14940354  |
| 39 NA19132 | [2515685 chr1 | 1 | 149573821 | 149583431 | 9611   | 5  | 0.889829  | 0.079156 | 149573460 | 149574182 | 149582912 | 14958395  |
| 40 NA19132 | [2515685 chr1 | 1 | 158224930 | 158265041 | 40112  | 49 | 0.45449   | 0.025131 | 158224584 | 158225276 | 158264771 | 15826531  |
| 41 NA19132 | [2515685 chr1 | 1 | 186707869 | 186715660 | 7792   | 2  | -0.661797 | 0.126615 | 186707530 | 186708208 | 186715224 | 18671609  |
| 42 NA19132 | [2515685 chr1 | 1 | 192738987 | 192742908 | 3922   | 2  | -0.933052 | 0.132051 | 192735688 | 192742257 | 192742712 | 19274310  |
| 43 NA19132 | [2515685 chr1 | 1 | 193442606 | 193448393 | 5788   | 8  | -0.422869 | 0.06281  | 193442421 | 193442791 | 193448156 | 19344863  |
| 44 NA19132 | [2515685 chr1 | 1 | 193449243 | 193553262 | 104020 | 86 | -0.994634 | 0.021498 | 193449010 | 193449476 | 193553050 | 19355347. |
| 45 NA19132 | [2515685 chr1 | 1 | 193612043 | 193659112 | 47070  | 46 | -0.353466 | 0.026307 | 193611792 | 193612295 | 193658669 | 19365955  |
| 46 NA19132 | [2515685 chr1 | 1 | 193676290 | 193685637 | 9348   | 13 | -0.270122 | 0.049928 | 193675509 | 193677071 | 193685042 | 19368623  |
| 47 NA19132 | [2515685 chr1 | 1 | 218762650 | 218768272 | 5623   | 6  | 0.366091  | 0.071819 | 218762212 | 218763089 | 218767017 | 21876952  |
| 48 NA19132 | [2515685 chr1 | 1 | 231219104 | 231262742 | 43639  | 49 | 0.294833  | 0.025131 | 231218806 | 231219402 | 231261830 | 23126365  |
| 49 NA19132 | [2515685 chr1 | 1 | 233202665 | 233204956 | 2292   | 42 | -1.938578 | 0.028653 | 233202312 | 233203018 | 233204364 | 23320554  |
| 50 NA19132 | [2515685 chr1 | 1 | 236719047 | 236720968 | 1922   | 3  | -0.978972 | 0.103619 | 236718751 | 236719344 | 236720749 | 23672118  |
| 51 NA19132 | [2515685 chr1 | 1 | 239368545 | 239481884 | 113340 | 13 | -0.437277 | 0.048792 | 239368239 | 239368851 | 239478614 | 23949135  |
| 52 NA19132 | [2515685 chr1 | 1 | 242722491 | 242725731 | 3241   | 2  | -0.72532  | 0.124394 | 242721008 | 242723975 | 242725024 | 24272643  |
| 53 NA19132 | [2515685 chr1 | 1 | 243009520 | 243011368 | 1849   | 3  | -1.24939  | 0.10181  | 243008430 | 243010610 | 243011204 | 24301153  |
| 54 NA19132 | [2515685 chr1 | 1 | 244469348 | 244473215 | 3868   | 8  | -0.333963 | 0.062197 | 244469164 | 244469532 | 244472720 | 24447371! |
| 55 NA19132 | [2515685 chr1 | 1 | 244645632 | 244816978 | 171347 | 13 | -0.25656  | 0.050916 | 244645444 | 244645821 | 244816413 | 24481754  |
| 56 NA19132 | [2515685 chr1 | 1 | 244872415 | 244874098 | 1684   | 5  | 0.956505  | 0.078674 | 244872245 | 244872585 | 244873799 | 24487439  |
| 57 NA19132 | [2515685 chr2 | 2 | 387423    | 391649    | 4227   | 8  | -0.312213 | 0.062198 | 386931    | 387915    | 391236    | 392063    |
| 58 NA19132 | [2515685 chr2 | 2 | 409864    | 411481    | 1618   | 12 | 0.652649  | 0.050784 | 409612    | 410116    | 411229    | 411733    |
| 59 NA19132 | [2515685 chr2 | 2 | 3716215   | 3720482   | 4268   | 11 | -0.288896 | 0.0537   | 3706538   | 3719168   | 3719838   | 372112!   |
| 60 NA19132 | [2515685 chr2 | 2 | 13482801  | 13503506  | 20706  | 20 | -0.271864 | 0.039337 | 13482599  | 13483003  | 13503126  | 1350388   |
| 61 NA19132 | [2515685 chr2 | 2 | 34606444  | 34644765  | 38322  | 39 | 0.731832  | 0.028589 | 34601818  | 34609397  | 34641812  | 3464839   |
| 62 NA19132 | [2515685 chr2 | 2 | 35845850  | 35851885  | 6036   | 5  | -0.442586 | 0.084924 | 35845464  | 35846237  | 35851440  | 3585233!  |
| 63 NA19132 | [2515685 chr2 | 2 | 35896477  | 35905932  | 9456   | 3  | -0.880799 | 0.101881 | 35879425  | 35899430  | 35902979  | 3590982   |
| 64 NA19132 | [2515685 chr2 | 2 | 35962678  | 35963578  | 901    | 2  | -0.67427  | 0.127433 | 35962370  | 35962986  | 35963398  | 3596375!  |

|             |               |   |           |           |        |     |                    |           |           |           |           |
|-------------|---------------|---|-----------|-----------|--------|-----|--------------------|-----------|-----------|-----------|-----------|
| 65 NA19132  | [2515685 chr2 | 2 | 36303416  | 36304826  | 1411   | 2   | -0.817496 0.130164 | 36303153  | 36303680  | 36304357  | 3630529!  |
| 66 NA19132  | [2515685 chr2 | 2 | 37869648  | 37914460  | 44813  | 46  | -0.45811 0.025998  | 37869077  | 37870220  | 37914012  | 3791490!  |
| 67 NA19132  | [2515685 chr2 | 2 | 40863695  | 40870913  | 7219   | 9   | -0.363601 0.058905 | 40863378  | 40864013  | 40870392  | 4087143!  |
| 68 NA19132  | [2515685 chr2 | 2 | 41150168  | 41161411  | 11244  | 13  | -0.834151 0.050475 | 41149866  | 41150471  | 41160114  | 4116270!  |
| 69 NA19132  | [2515685 chr2 | 2 | 46687594  | 46701952  | 14359  | 13  | 0.533078 0.048791  | 46687007  | 46688182  | 46701688  | 4670221!  |
| 70 NA19132  | [2515685 chr2 | 2 | 55822423  | 55850659  | 28237  | 29  | 0.479069 0.032814  | 55821905  | 55822941  | 55850414  | 5585090!  |
| 71 NA19132  | [2515685 chr2 | 2 | 56563624  | 56567381  | 3758   | 2   | 3.050854 0.222604  | 56556559  | 56566577  | 56567035  | 5656772!  |
| 72 NA19132  | [2515685 chr2 | 2 | 60675284  | 60684165  | 8882   | 12  | -0.284946 0.051963 | 60674771  | 60675798  | 60683663  | 6068466!  |
| 73 NA19132  | [2515685 chr2 | 2 | 66296291  | 66304079  | 7789   | 2   | -0.671271 0.124395 | 66295868  | 66296714  | 66303096  | 6630506!  |
| 74 NA19132  | [2515685 chr2 | 2 | 73922476  | 73948487  | 26012  | 42  | -0.773989 0.027458 | 73922222  | 73922730  | 73948060  | 7394891!  |
| 75 NA19132  | [2515685 chr2 | 2 | 78210396  | 78211832  | 1437   | 2   | -0.758252 0.124395 | 78210162  | 78210630  | 78211409  | 7821225!  |
| 76 NA19132  | [2515685 chr2 | 2 | 87797469  | 87798699  | 1231   | 2   | -0.697206 0.124394 | 87797177  | 87797761  | 87798323  | 8779907!  |
| 77 NA19132  | [2515685 chr2 | 2 | 91334052  | 91344510  | 10459  | 11  | 0.360463 0.053042  | 91333845  | 91334260  | 91344286  | 9134473!  |
| 78 NA19132  | [2515685 chr2 | 2 | 91383903  | 91393586  | 9684   | 20  | 0.30773 0.039337   | 91383809  | 91383997  | 91392231  | 9139494!  |
| 79 NA19132  | [2515685 chr2 | 2 | 94851967  | 94871889  | 19923  | 9   | 0.302679 0.05864   | 94851472  | 94852462  | 94869597  | 9487418!  |
| 80 NA19132  | [2515685 chr2 | 2 | 97184386  | 97189735  | 5350   | 2   | -0.725516 0.124395 | 97182781  | 97185992  | 97186782  | 9719672!  |
| 81 NA19132  | [2515685 chr2 | 2 | 97613796  | 97614932  | 1137   | 2   | 0.925796 0.126943  | 97613553  | 97614040  | 97614467  | 9761539!  |
| 82 NA19132  | [2515685 chr2 | 2 | 97798981  | 97803184  | 4204   | 4   | 0.49151 0.088121   | 97798790  | 97799172  | 97802698  | 9780367!  |
| 83 NA19132  | [2515685 chr2 | 2 | 98321720  | 98324284  | 2565   | 2   | -0.632682 0.124395 | 98321042  | 98322399  | 98323320  | 9832524!  |
| 84 NA19132  | [2515685 chr2 | 2 | 106337506 | 106344320 | 6815   | 8   | -0.472842 0.065076 | 106337244 | 106337769 | 106344055 | 10634458  |
| 85 NA19132  | [2515685 chr2 | 2 | 110599391 | 110626024 | 26634  | 16  | -0.327461 0.04398  | 110599162 | 110599620 | 110625903 | 11062614  |
| 86 NA19132  | [2515685 chr2 | 2 | 116258416 | 116261015 | 2600   | 2   | -0.690707 0.124395 | 116257994 | 116258838 | 116260184 | 11626184  |
| 87 NA19132  | [2515685 chr2 | 2 | 126159437 | 126168349 | 8913   | 3   | -2.60371 0.136598  | 126158494 | 126160381 | 126168048 | 12616865  |
| 88 NA19132  | [2515685 chr2 | 2 | 129229413 | 129230774 | 1362   | 2   | -1.535602 0.139033 | 129229234 | 129229593 | 129230356 | 12923119  |
| 89 NA19132  | [2515685 chr2 | 2 | 130420955 | 130484511 | 63557  | 75  | -0.350466 0.020427 | 130420630 | 130421281 | 130484324 | 13048469  |
| 90 NA19132  | [2515685 chr2 | 2 | 130551722 | 130559081 | 7360   | 13  | -0.445145 0.048792 | 130551682 | 130551762 | 130558687 | 13055947  |
| 91 NA19132  | [2515685 chr2 | 2 | 130588071 | 130593899 | 5829   | 12  | -0.433537 0.050784 | 130587748 | 130588395 | 130593530 | 13059426  |
| 92 NA19132  | [2515685 chr2 | 2 | 130885569 | 130897796 | 12228  | 18  | -0.31632 0.041465  | 130885118 | 130886020 | 130897715 | 13089787  |
| 93 NA19132  | [2515685 chr2 | 2 | 131288823 | 131301010 | 12188  | 18  | -0.326744 0.041465 | 131288742 | 131288905 | 131300558 | 13130146  |
| 94 NA19132  | [2515685 chr2 | 2 | 131765081 | 131783622 | 18542  | 29  | -0.418992 0.032668 | 131749458 | 131768034 | 131783274 | 13178397  |
| 95 NA19132  | [2515685 chr2 | 2 | 131810915 | 131815930 | 5016   | 11  | -0.476553 0.053042 | 131810493 | 131811338 | 131815635 | 13181622  |
| 96 NA19132  | [2515685 chr2 | 2 | 131845027 | 131852310 | 7284   | 12  | -0.450039 0.050784 | 131844542 | 131845513 | 131852270 | 13185235  |
| 97 NA19132  | [2515685 chr2 | 2 | 131917827 | 131927973 | 10147  | 18  | -0.515687 0.041583 | 131917559 | 131918096 | 131927771 | 13192817  |
| 98 NA19132  | [2515685 chr2 | 2 | 131947114 | 131953962 | 6849   | 10  | -0.463242 0.055631 | 131946771 | 131947457 | 131953571 | 13195435  |
| 99 NA19132  | [2515685 chr2 | 2 | 132146137 | 132346526 | 200390 | 230 | -0.385513 0.01163  | 132145137 | 132147138 | 132344315 | 13234873  |
| 100 NA19132 | [2515685 chr2 | 2 | 132722873 | 132724898 | 2026   | 2   | -0.641524 0.124394 | 132721623 | 132724124 | 132724715 | 13272508  |
| 101 NA19132 | [2515685 chr2 | 2 | 146694145 | 146710744 | 16600  | 17  | 0.78352 0.044174   | 146688620 | 146697098 | 146710557 | 14671093  |
| 102 NA19132 | [2515685 chr2 | 2 | 153495550 | 153499409 | 3860   | 2   | 0.807732 0.124395  | 153484545 | 153498503 | 153498846 | 15349997  |
| 103 NA19132 | [2515685 chr2 | 2 | 153622711 | 153625256 | 2546   | 3   | 0.914187 0.101567  | 153621175 | 153624247 | 153625088 | 15362542  |
| 104 NA19132 | [2515685 chr2 | 2 | 180237123 | 180248951 | 11829  | 10  | -0.77369 0.05581   | 180235687 | 180238560 | 180248568 | 18024933  |
| 105 NA19132 | [2515685 chr2 | 2 | 187262638 | 187268390 | 5753   | 6   | -0.441644 0.072096 | 187262225 | 187263052 | 187267918 | 18726886  |
| 106 NA19132 | [2515685 chr2 | 2 | 195804965 | 195809805 | 4841   | 5   | -0.649801 0.084855 | 195803577 | 195806354 | 195809355 | 19581025  |
| 107 NA19132 | [2515685 chr2 | 2 | 205441386 | 205443342 | 1957   | 2   | 0.684607 0.124395  | 205440952 | 205441821 | 205443078 | 20544360  |
| 108 NA19132 | [2515685 chr2 | 2 | 208176479 | 208184457 | 7979   | 7   | 0.827738 0.066492  | 208176093 | 208176865 | 208183930 | 20818498  |
| 109 NA19132 | [2515685 chr2 | 2 | 232510540 | 232537143 | 26604  | 7   | -0.346824 0.066491 | 232509939 | 232511142 | 232534243 | 23254004  |
| 110 NA19132 | [2515685 chr3 | 3 | 149944    | 153247    | 3304   | 5   | -0.558226 0.078674 | 148712    | 151176    | 152890    | 153604    |
| 111 NA19132 | [2515685 chr3 | 3 | 587432    | 638425    | 50994  | 44  | -0.434746 0.026521 | 586921    | 587943    | 638149    | 638701    |
| 112 NA19132 | [2515685 chr3 | 3 | 1757211   | 1765705   | 8495   | 2   | 0.911037 0.130312  | 1756096   | 1758327   | 1762058   | 179730!   |
| 113 NA19132 | [2515685 chr3 | 3 | 4168753   | 4177170   | 8418   | 9   | -0.958645 0.063155 | 4168584   | 4168923   | 4174525   | 417981!   |
| 114 NA19132 | [2515685 chr3 | 3 | 33410617  | 33411686  | 1070   | 2   | -0.728209 0.129098 | 33410106  | 33411128  | 33411547  | 3341182!  |
| 115 NA19132 | [2515685 chr3 | 3 | 41469117  | 41473056  | 3940   | 6   | -0.399911 0.071819 | 41468819  | 41469416  | 41472897  | 4147321!  |
| 116 NA19132 | [2515685 chr3 | 3 | 75849963  | 75870826  | 20864  | 11  | 0.434747 0.053042  | 75849675  | 75850251  | 75870534  | 7587111!  |
| 117 NA19132 | [2515685 chr3 | 3 | 82951524  | 82955577  | 4054   | 7   | -0.964937 0.068747 | 82951325  | 82951723  | 82955245  | 8295590!  |
| 118 NA19132 | [2515685 chr3 | 3 | 105923515 | 105926689 | 3175   | 3   | -0.531769 0.104623 | 105923277 | 105923754 | 105926199 | 10592718! |
| 119 NA19132 | [2515685 chr3 | 3 | 116139491 | 116150621 | 11131  | 12  | -4.332395 0.099182 | 116137943 | 116141040 | 116146974 | 11615548  |

|             |               |   |           |           |        |     |           |          |           |           |           |          |
|-------------|---------------|---|-----------|-----------|--------|-----|-----------|----------|-----------|-----------|-----------|----------|
| 120 NA19132 | [2515685 chr3 | 3 | 127194674 | 127205942 | 11269  | 11  | -1.970511 | 0.070455 | 127193385 | 127195964 | 127204352 | 12720753 |
| 121 NA19132 | [2515685 chr3 | 3 | 138512040 | 138519357 | 7318   | 10  | -0.71901  | 0.055631 | 138510035 | 138514045 | 138515710 | 13858655 |
| 122 NA19132 | [2515685 chr3 | 3 | 144701165 | 144703799 | 2635   | 2   | -1.078531 | 0.127796 | 144699852 | 144702479 | 144703331 | 14470426 |
| 123 NA19132 | [2515685 chr3 | 3 | 163994592 | 164106273 | 111682 | 108 | 3.004253  | 0.028325 | 163993392 | 163995793 | 164106029 | 16410651 |
| 124 NA19132 | [2515685 chr3 | 3 | 164106273 | 164108502 | 2230   | 2   | 0.639775  | 0.124395 | 164106029 | 164106517 | 164108018 | 16410898 |
| 125 NA19132 | [2515685 chr3 | 3 | 164200660 | 164204121 | 3462   | 4   | -3.760688 | 0.16455  | 164200187 | 164201133 | 164203568 | 16420467 |
| 126 NA19132 | [2515685 chr3 | 3 | 191219813 | 191223326 | 3514   | 4   | -2.142628 | 0.125422 | 191219291 | 191220336 | 191222918 | 19122373 |
| 127 NA19132 | [2515685 chr3 | 3 | 192548021 | 192554331 | 6311   | 9   | 0.853694  | 0.05864  | 192547674 | 192548368 | 192554127 | 19255453 |
| 128 NA19132 | [2515685 chr3 | 3 | 194361639 | 194364135 | 2497   | 3   | 0.670049  | 0.128959 | 194361092 | 194362187 | 194363777 | 19436449 |
| 129 NA19132 | [2515685 chr3 | 3 | 196681634 | 196713768 | 32135  | 35  | -0.304761 | 0.029736 | 196680972 | 196682296 | 196711768 | 19671576 |
| 130 NA19132 | [2515685 chr3 | 3 | 196872200 | 196966359 | 94160  | 108 | -0.293583 | 0.016928 | 196871164 | 196873236 | 196966111 | 19696660 |
| 131 NA19132 | [2515685 chr3 | 3 | 196994475 | 197002965 | 8491   | 10  | 0.314704  | 0.055631 | 196994054 | 196994896 | 197002044 | 19700388 |
| 132 NA19132 | [2515685 chr3 | 3 | 198043467 | 198048458 | 4992   | 8   | -0.33266  | 0.066134 | 198043278 | 198043657 | 198048200 | 19804871 |
| 133 NA19132 | [2515685 chr3 | 3 | 198422794 | 198427408 | 4615   | 2   | 0.757049  | 0.128933 | 198422381 | 198423207 | 198423959 | 19843085 |
| 134 NA19132 | [2515685 chr3 | 3 | 198674426 | 198675470 | 1045   | 6   | 0.938968  | 0.071819 | 198674161 | 198674692 | 198674903 | 19867603 |
| 135 NA19132 | [2515685 chr3 | 3 | 198822625 | 198862287 | 39663  | 37  | -0.274985 | 0.029026 | 198822427 | 198822824 | 198862193 | 19886238 |
| 136 NA19132 | [2515685 chr3 | 3 | 198871224 | 198879595 | 8372   | 10  | -0.285184 | 0.055631 | 198870912 | 198871537 | 198879302 | 19887988 |
| 137 NA19132 | [2515685 chr3 | 3 | 199218619 | 199221999 | 3381   | 12  | -0.661023 | 0.050784 | 199218354 | 199218884 | 199220440 | 19922355 |
| 138 NA19132 | [2515685 chr3 | 3 | 199313925 | 199321063 | 7139   | 15  | 1.589706  | 0.046717 | 199313515 | 199314336 | 199320844 | 19932128 |
| 139 NA19132 | [2515685 chr3 | 3 | 199352465 | 199359802 | 7338   | 11  | 0.438748  | 0.053042 | 199352174 | 199352757 | 199359116 | 19936048 |
| 140 NA19132 | [2515685 chr4 | 4 | 8739800   | 8756949   | 17150  | 26  | 0.336414  | 0.034501 | 8739551   | 8740049   | 8756813   | 875708   |
| 141 NA19132 | [2515685 chr4 | 4 | 8998177   | 9046719   | 48543  | 87  | 1.535195  | 0.019204 | 8850774   | 9001243   | 9046129   | 904730   |
| 142 NA19132 | [2515685 chr4 | 4 | 9302876   | 9308037   | 5162   | 5   | -0.618995 | 0.078674 | 9302535   | 9303218   | 9306599   | 930947   |
| 143 NA19132 | [2515685 chr4 | 4 | 9812346   | 9813108   | 763    | 33  | 2.401114  | 0.031171 | 9812284   | 9812408   | 9812952   | 981326   |
| 144 NA19132 | [2515685 chr4 | 4 | 9887220   | 9911397   | 24178  | 31  | 2.281296  | 0.044618 | 9886886   | 9887555   | 9910388   | 991240   |
| 145 NA19132 | [2515685 chr4 | 4 | 21045633  | 21053532  | 7900   | 8   | -0.810131 | 0.064926 | 21045231  | 21046035  | 21053115  | 2105395  |
| 146 NA19132 | [2515685 chr4 | 4 | 28258384  | 28261621  | 3238   | 2   | 0.633987  | 0.125768 | 28258088  | 28258681  | 28261358  | 2826188  |
| 147 NA19132 | [2515685 chr4 | 4 | 28902859  | 28909978  | 7120   | 7   | -0.852537 | 0.066575 | 28902652  | 28903066  | 28906912  | 2891435  |
| 148 NA19132 | [2515685 chr4 | 4 | 44846553  | 44852241  | 5689   | 7   | -0.395316 | 0.068639 | 44846404  | 44846702  | 44851938  | 4485254  |
| 149 NA19132 | [2515685 chr4 | 4 | 49002144  | 49003465  | 1322   | 8   | 0.41395   | 0.062197 | 49002100  | 49002189  | 49003383  | 4900354  |
| 150 NA19132 | [2515685 chr4 | 4 | 57380811  | 57385462  | 4652   | 5   | -0.649307 | 0.078751 | 57380085  | 57381537  | 57384913  | 5738601  |
| 151 NA19132 | [2515685 chr4 | 4 | 61629456  | 61631179  | 1724   | 3   | 0.604237  | 0.103195 | 61629102  | 61629811  | 61630733  | 6163162  |
| 152 NA19132 | [2515685 chr4 | 4 | 63500374  | 63504889  | 4516   | 5   | -0.968762 | 0.085972 | 63494261  | 63503440  | 63504639  | 6350514  |
| 153 NA19132 | [2515685 chr4 | 4 | 69202095  | 69319814  | 117720 | 72  | 1.545885  | 0.025839 | 69201955  | 69202236  | 69319569  | 6932005  |
| 154 NA19132 | [2515685 chr4 | 4 | 69319814  | 69368478  | 48665  | 45  | 0.491718  | 0.026225 | 69319569  | 69320059  | 69365412  | 6938219  |
| 155 NA19132 | [2515685 chr4 | 4 | 69671789  | 69715868  | 44080  | 50  | 0.456225  | 0.025228 | 69671604  | 69671975  | 69715712  | 6971602  |
| 156 NA19132 | [2515685 chr4 | 4 | 70061459  | 70063689  | 2231   | 4   | -0.567911 | 0.08796  | 70061192  | 70061727  | 70063395  | 7006398  |
| 157 NA19132 | [2515685 chr4 | 4 | 70288567  | 70289588  | 1022   | 2   | -0.749063 | 0.124395 | 70288305  | 70288829  | 70289452  | 7028972  |
| 158 NA19132 | [2515685 chr4 | 4 | 70438756  | 70457600  | 18845  | 21  | -0.445214 | 0.038993 | 70438031  | 70439482  | 70457061  | 7045813  |
| 159 NA19132 | [2515685 chr4 | 4 | 87333407  | 87337560  | 4154   | 4   | -1.001616 | 0.089189 | 87333057  | 87333758  | 87337055  | 8733806  |
| 160 NA19132 | [2515685 chr4 | 4 | 89565833  | 89567092  | 1260   | 2   | -0.887504 | 0.138418 | 89565358  | 89566309  | 89566839  | 8956734  |
| 161 NA19132 | [2515685 chr4 | 4 | 92513593  | 92519521  | 5929   | 3   | 0.544595  | 0.101567 | 92512709  | 92514477  | 92519015  | 9252002  |
| 162 NA19132 | [2515685 chr4 | 4 | 115534210 | 115541546 | 7337   | 9   | 0.85279   | 0.061287 | 115530015 | 115537276 | 115539984 | 11554310 |
| 163 NA19132 | [2515685 chr4 | 4 | 115865203 | 115869481 | 4279   | 3   | -2.326618 | 0.139262 | 115864913 | 115865494 | 115866415 | 11587556 |
| 164 NA19132 | [2515685 chr4 | 4 | 119480820 | 119487782 | 6963   | 5   | -0.786814 | 0.078674 | 119473487 | 119483886 | 119487418 | 11948814 |
| 165 NA19132 | [2515685 chr4 | 4 | 119512941 | 119515902 | 2962   | 3   | -0.60748  | 0.101568 | 119512552 | 119513331 | 119515514 | 11951629 |
| 166 NA19132 | [2515685 chr4 | 4 | 124835704 | 124837199 | 1496   | 3   | -0.717387 | 0.106738 | 124835418 | 124835991 | 124836924 | 12483747 |
| 167 NA19132 | [2515685 chr4 | 4 | 138537751 | 138549906 | 12156  | 14  | 0.864076  | 0.051148 | 138537443 | 138538059 | 138547414 | 13855239 |
| 168 NA19132 | [2515685 chr4 | 4 | 145236566 | 145250378 | 13813  | 11  | -0.309382 | 0.054917 | 145236214 | 145236919 | 145250020 | 14525073 |
| 169 NA19132 | [2515685 chr4 | 4 | 157245354 | 157247619 | 2266   | 2   | -0.628596 | 0.124395 | 157244897 | 157245812 | 157246572 | 15724866 |
| 170 NA19132 | [2515685 chr4 | 4 | 162578301 | 162579832 | 1532   | 2   | -0.747517 | 0.124394 | 162577752 | 162578850 | 162579615 | 16258004 |
| 171 NA19132 | [2515685 chr4 | 4 | 162806038 | 162809269 | 3232   | 3   | 0.736525  | 0.101567 | 162804872 | 162807204 | 162808734 | 16280980 |
| 172 NA19132 | [2515685 chr4 | 4 | 166012113 | 166016847 | 4735   | 2   | -0.628727 | 0.124395 | 166011431 | 166012796 | 166013781 | 16608193 |
| 173 NA19132 | [2515685 chr4 | 4 | 169184442 | 169368370 | 183929 | 162 | 0.743809  | 0.014157 | 169184090 | 169184794 | 169366713 | 16937002 |
| 174 NA19132 | [2515685 chr4 | 4 | 172750241 | 172755216 | 4976   | 2   | 0.875168  | 0.140822 | 172748887 | 172751596 | 172753256 | 17275717 |

|             |               |   |           |           |        |     |           |          |           |           |           |           |
|-------------|---------------|---|-----------|-----------|--------|-----|-----------|----------|-----------|-----------|-----------|-----------|
| 175 NA19132 | [2515685 chr4 | 4 | 173799832 | 173807321 | 7490   | 6   | -2.704869 | 0.128308 | 173799464 | 173800201 | 173804255 | 17381134  |
| 176 NA19132 | [2515685 chr4 | 4 | 18553276  | 185544849 | 11574  | 12  | 0.897158  | 0.051327 | 185532696 | 185533857 | 185543276 | 18554642  |
| 177 NA19132 | [2515685 chr4 | 4 | 186816951 | 186819359 | 2409   | 3   | 3.413451  | 0.167468 | 186816420 | 186817483 | 186819049 | 18681967  |
| 178 NA19132 | [2515685 chr4 | 4 | 187728494 | 187732907 | 4414   | 15  | 0.364983  | 0.045423 | 187728193 | 187728795 | 187732541 | 18773327  |
| 179 NA19132 | [2515685 chr4 | 4 | 188254778 | 188279303 | 24526  | 248 | -0.282226 | 0.011177 | 188254341 | 188255215 | 188278596 | 18828001  |
| 180 NA19132 | [2515685 chr4 | 4 | 190528602 | 190533163 | 4562   | 21  | -2.763989 | 0.052018 | 190528058 | 190529146 | 190531664 | 19053466  |
| 181 NA19132 | [2515685 chr5 | 5 | 261631    | 267007    | 5377   | 22  | 0.450136  | 0.037507 | 261032    | 262230    | 266353    | 267662    |
| 182 NA19132 | [2515685 chr5 | 5 | 308903    | 322664    | 13762  | 12  | -0.324374 | 0.050784 | 308486    | 309320    | 321893    | 323435    |
| 183 NA19132 | [2515685 chr5 | 5 | 807281    | 820048    | 12768  | 17  | 0.567664  | 0.042667 | 807055    | 807507    | 819824    | 820272    |
| 184 NA19132 | [2515685 chr5 | 5 | 852262    | 871676    | 19415  | 18  | 0.384435  | 0.041465 | 851338    | 853187    | 871269    | 872083    |
| 185 NA19132 | [2515685 chr5 | 5 | 899786    | 900983    | 1198   | 2   | 0.736548  | 0.124395 | 899494    | 900078    | 900648    | 901315    |
| 186 NA19132 | [2515685 chr5 | 5 | 1075284   | 1079920   | 4637   | 24  | 0.859463  | 0.035909 | 1074709   | 1075859   | 1079566   | 1080271   |
| 187 NA19132 | [2515685 chr5 | 5 | 1122995   | 1126517   | 3523   | 38  | 0.581182  | 0.028538 | 1122772   | 1123219   | 1126389   | 1126644   |
| 188 NA19132 | [2515685 chr5 | 5 | 1223248   | 1223930   | 683    | 5   | 0.928634  | 0.078674 | 1223057   | 1223439   | 1223854   | 1224007   |
| 189 NA19132 | [2515685 chr5 | 5 | 5144187   | 5148385   | 4199   | 4   | -0.45332  | 0.088344 | 5143120   | 5145255   | 5148012   | 5148755   |
| 190 NA19132 | [2515685 chr5 | 5 | 12863961  | 12873512  | 9552   | 14  | -1.003267 | 0.050448 | 12863778  | 12864144  | 12873198  | 12873827  |
| 191 NA19132 | [2515685 chr5 | 5 | 17515674  | 17525104  | 9431   | 7   | -0.612976 | 0.066491 | 17510191  | 17518865  | 17523994  | 17526214  |
| 192 NA19132 | [2515685 chr5 | 5 | 19410747  | 19412172  | 1426   | 3   | 0.819028  | 0.107054 | 19410189  | 19411305  | 19411980  | 19412361  |
| 193 NA19132 | [2515685 chr5 | 5 | 20456131  | 20463668  | 7538   | 2   | -0.9678   | 0.124394 | 20454382  | 20457881  | 20462468  | 20464861  |
| 194 NA19132 | [2515685 chr5 | 5 | 21308420  | 21398924  | 90505  | 143 | 0.250668  | 0.014711 | 21307943  | 21308898  | 21398116  | 21399731  |
| 195 NA19132 | [2515685 chr5 | 5 | 21514574  | 21526767  | 12194  | 22  | -0.330321 | 0.037506 | 21513711  | 21515438  | 21526436  | 21527091  |
| 196 NA19132 | [2515685 chr5 | 5 | 26829433  | 26837938  | 8506   | 7   | 0.654001  | 0.074702 | 26829009  | 26829858  | 26837469  | 26838401  |
| 197 NA19132 | [2515685 chr5 | 5 | 32688498  | 32718732  | 30235  | 11  | 0.281052  | 0.053261 | 32688276  | 32688720  | 32718328  | 32719131  |
| 198 NA19132 | [2515685 chr5 | 5 | 34219149  | 34232271  | 13123  | 28  | -0.319171 | 0.033246 | 34218815  | 34219483  | 34231243  | 34233301  |
| 199 NA19132 | [2515685 chr5 | 5 | 68865200  | 68885666  | 20467  | 43  | 0.657418  | 0.027112 | 68864770  | 68865630  | 68885378  | 68885951  |
| 200 NA19132 | [2515685 chr5 | 5 | 68940643  | 68957363  | 16721  | 37  | 0.286944  | 0.028921 | 68940465  | 68940821  | 68956905  | 68957821  |
| 201 NA19132 | [2515685 chr5 | 5 | 68992108  | 68994317  | 2210   | 8   | 0.428676  | 0.062197 | 68991974  | 68992242  | 68993992  | 68994641  |
| 202 NA19132 | [2515685 chr5 | 5 | 69045001  | 69173645  | 128645 | 313 | 0.327894  | 0.009944 | 69044855  | 69045147  | 69173562  | 69173721  |
| 203 NA19132 | [2515685 chr5 | 5 | 69226683  | 69240984  | 14302  | 27  | -0.261636 | 0.033856 | 69226508  | 69226858  | 69240926  | 69241041  |
| 204 NA19132 | [2515685 chr5 | 5 | 69452287  | 69459890  | 7604   | 16  | 0.316692  | 0.04398  | 69451575  | 69452999  | 69459629  | 69460151  |
| 205 NA19132 | [2515685 chr5 | 5 | 69571849  | 69574058  | 2210   | 8   | 0.428676  | 0.062197 | 69571715  | 69571983  | 69573733  | 69574381  |
| 206 NA19132 | [2515685 chr5 | 5 | 69624725  | 69762900  | 138176 | 301 | 0.297799  | 0.010141 | 69624579  | 69624871  | 69760257  | 69765541  |
| 207 NA19132 | [2515685 chr5 | 5 | 69795789  | 69812736  | 16948  | 36  | 0.286232  | 0.02932  | 69795611  | 69795967  | 69812041  | 69813431  |
| 208 NA19132 | [2515685 chr5 | 5 | 69868229  | 69870418  | 2190   | 8   | 0.465917  | 0.062197 | 69868095  | 69868363  | 69870077  | 69870751  |
| 209 NA19132 | [2515685 chr5 | 5 | 69920045  | 70048545  | 128501 | 293 | 0.317148  | 0.010277 | 69919964  | 69920127  | 70048399  | 70048691  |
| 210 NA19132 | [2515685 chr5 | 5 | 70102565  | 70116050  | 13486  | 25  | -0.256549 | 0.035184 | 70102390  | 70102740  | 70115992  | 70116101  |
| 211 NA19132 | [2515685 chr5 | 5 | 70341971  | 70346521  | 4551   | 6   | 0.822307  | 0.071857 | 70341537  | 70342406  | 70346074  | 70346961  |
| 212 NA19132 | [2515685 chr5 | 5 | 70404510  | 70426554  | 22045  | 42  | 0.69524   | 0.027287 | 70403337  | 70405684  | 70425419  | 70427681  |
| 213 NA19132 | [2515685 chr5 | 5 | 70572187  | 70574396  | 2210   | 8   | 0.442994  | 0.062197 | 70572053  | 70572321  | 70574071  | 70574721  |
| 214 NA19132 | [2515685 chr5 | 5 | 70624020  | 70688376  | 64357  | 145 | 0.319951  | 0.014609 | 70623939  | 70624102  | 70687859  | 70688891  |
| 215 NA19132 | [2515685 chr5 | 5 | 81459214  | 81466054  | 6841   | 2   | -1.515292 | 0.130522 | 81455614  | 81462405  | 81462863  | 81470281  |
| 216 NA19132 | [2515685 chr5 | 5 | 97427204  | 97428353  | 11150  | 2   | 0.916769  | 0.124394 | 97426913  | 97427496  | 97428177  | 97428521  |
| 217 NA19132 | [2515685 chr5 | 5 | 98784878  | 98786635  | 1758   | 3   | -0.563655 | 0.110864 | 98784677  | 98785080  | 98786281  | 98786981  |
| 218 NA19132 | [2515685 chr5 | 5 | 99409393  | 99420285  | 10893  | 14  | -0.27142  | 0.047017 | 99408997  | 99409789  | 99419746  | 99420821  |
| 219 NA19132 | [2515685 chr5 | 5 | 99746121  | 99762815  | 16695  | 29  | -0.29542  | 0.032667 | 99745760  | 99746482  | 99762102  | 99763521  |
| 220 NA19132 | [2515685 chr5 | 5 | 109724670 | 109725627 | 958    | 2   | -0.666341 | 0.124395 | 109724498 | 109724843 | 109725464 | 109725791 |
| 221 NA19132 | [2515685 chr5 | 5 | 109794290 | 109801944 | 7655   | 5   | -0.463287 | 0.085936 | 109793976 | 109794605 | 109801781 | 109802101 |
| 222 NA19132 | [2515685 chr5 | 5 | 109880391 | 109881914 | 1524   | 2   | 0.925648  | 0.124916 | 109879999 | 109880783 | 109881640 | 109882181 |
| 223 NA19132 | [2515685 chr5 | 5 | 122649189 | 122651412 | 2224   | 3   | -0.601388 | 0.101567 | 122648933 | 122649446 | 122650032 | 122652791 |
| 224 NA19132 | [2515685 chr5 | 5 | 137835178 | 137844134 | 8957   | 8   | 0.592345  | 0.063684 | 137834745 | 137835611 | 137843310 | 137844951 |
| 225 NA19132 | [2515685 chr5 | 5 | 140203081 | 140217091 | 14011  | 18  | 2.295935  | 0.06054  | 140202344 | 140203819 | 140216552 | 140217631 |
| 226 NA19132 | [2515685 chr5 | 5 | 140534849 | 140540106 | 5258   | 5   | 0.448205  | 0.078674 | 140534700 | 140534999 | 140539007 | 140541201 |
| 227 NA19132 | [2515685 chr5 | 5 | 150198306 | 150203144 | 4839   | 7   | -0.672032 | 0.067119 | 150197730 | 150198882 | 150202838 | 150203451 |
| 228 NA19132 | [2515685 chr5 | 5 | 165157996 | 165161604 | 3609   | 2   | -1.410045 | 0.135225 | 165155280 | 165160712 | 165160802 | 165162401 |
| 229 NA19132 | [2515685 chr5 | 5 | 180308895 | 180363417 | 54523  | 54  | 0.554591  | 0.02409  | 180308688 | 180309103 | 180363120 | 180363711 |



|             |               |   |           |           |        |     |           |          |           |           |           |          |
|-------------|---------------|---|-----------|-----------|--------|-----|-----------|----------|-----------|-----------|-----------|----------|
| 230 NA19132 | [2515685 chr6 | 6 | 3163      | 18689     | 15527  | 4   | 0.648522  | 0.08796  | 1         | 6325      | 15669     | 21709    |
| 231 NA19132 | [2515685 chr6 | 6 | 201823    | 326596    | 124774 | 128 | 0.291128  | 0.015566 | 201415    | 202232    | 326200    | 326995   |
| 232 NA19132 | [2515685 chr6 | 6 | 29958572  | 30015556  | 56985  | 52  | 0.489007  | 0.024611 | 29957670  | 29959474  | 30014305  | 30016801 |
| 233 NA19132 | [2515685 chr6 | 6 | 30024048  | 30046157  | 22110  | 17  | -0.444362 | 0.043096 | 30022687  | 30025409  | 30045561  | 30046751 |
| 234 NA19132 | [2515685 chr6 | 6 | 31439511  | 31441189  | 1679   | 2   | -0.665154 | 0.124395 | 31439144  | 31439878  | 31440910  | 31441461 |
| 235 NA19132 | [2515685 chr6 | 6 | 31467241  | 31469444  | 2204   | 2   | -1.020821 | 0.130482 | 31466904  | 31467579  | 31468410  | 31470471 |
| 236 NA19132 | [2515685 chr6 | 6 | 31496274  | 31515665  | 19392  | 4   | -0.484993 | 0.08796  | 31495261  | 31497288  | 31515350  | 31515981 |
| 237 NA19132 | [2515685 chr6 | 6 | 32538780  | 32547042  | 8263   | 4   | -0.385326 | 0.042919 | 32538477  | 32539084  | 32546557  | 32547521 |
| 238 NA19132 | [2515685 chr6 | 6 | 32549693  | 32557802  | 8110   | 8   | -0.385326 | 0.042919 | 32549372  | 32550014  | 32557647  | 32557951 |
| 239 NA19132 | [2515685 chr6 | 6 | 32557802  | 32558865  | 1064   | 2   | 0.668508  | 0.124395 | 32557647  | 32557958  | 32558698  | 32559031 |
| 240 NA19132 | [2515685 chr6 | 6 | 32565102  | 32586862  | 21761  | 3   | -3.034425 | 0.229676 | 32564888  | 32565316  | 32586127  | 32587591 |
| 241 NA19132 | [2515685 chr6 | 6 | 32586862  | 32588830  | 1969   | 3   | -0.673915 | 0.123956 | 32586127  | 32587597  | 32588323  | 32589331 |
| 242 NA19132 | [2515685 chr6 | 6 | 32591649  | 32594326  | 2678   | 4   | 0.738492  | 0.105333 | 32591403  | 32591896  | 32594082  | 32594571 |
| 243 NA19132 | [2515685 chr6 | 6 | 32598573  | 32632349  | 33777  | 28  | -0.699198 | 0.037229 | 32598133  | 32599013  | 32632089  | 32632611 |
| 244 NA19132 | [2515685 chr6 | 6 | 32653862  | 32655482  | 1621   | 3   | 0.744815  | 0.132835 | 32653679  | 32654046  | 32654980  | 32655981 |
| 245 NA19132 | [2515685 chr6 | 6 | 32702716  | 32705737  | 3022   | 3   | -1.329231 | 0.108812 | 32702285  | 32703148  | 32704019  | 32707451 |
| 246 NA19132 | [2515685 chr6 | 6 | 32709110  | 32712337  | 3228   | 4   | -0.524245 | 0.08796  | 32708806  | 32709414  | 32712193  | 32712481 |
| 247 NA19132 | [2515685 chr6 | 6 | 32739496  | 32740792  | 1297   | 2   | 1.184003  | 0.17372  | 32739164  | 32739828  | 32740450  | 32741131 |
| 248 NA19132 | [2515685 chr6 | 6 | 32799932  | 32801270  | 1339   | 2   | 1.045278  | 0.126174 | 32799289  | 32800576  | 32800912  | 32801621 |
| 249 NA19132 | [2515685 chr6 | 6 | 35862833  | 35874426  | 11594  | 13  | 0.76734   | 0.048791 | 35862530  | 35863136  | 35873957  | 35874891 |
| 250 NA19132 | [2515685 chr6 | 6 | 54036900  | 54042384  | 5485   | 5   | 2.917587  | 0.140007 | 54036573  | 54037227  | 54041771  | 54042991 |
| 251 NA19132 | [2515685 chr6 | 6 | 66455162  | 66462462  | 7301   | 6   | -0.926806 | 0.080116 | 66454046  | 66456278  | 66462257  | 66462661 |
| 252 NA19132 | [2515685 chr6 | 6 | 68292376  | 68305567  | 13192  | 10  | 0.484382  | 0.055631 | 68292072  | 68292680  | 68305280  | 68305851 |
| 253 NA19132 | [2515685 chr6 | 6 | 68348353  | 68357752  | 9400   | 3   | -0.629805 | 0.109695 | 68347172  | 68349534  | 68355593  | 68359911 |
| 254 NA19132 | [2515685 chr6 | 6 | 68551595  | 68559041  | 7447   | 10  | -0.296929 | 0.055746 | 68551347  | 68551844  | 68558775  | 68559301 |
| 255 NA19132 | [2515685 chr6 | 6 | 77495034  | 77513512  | 18479  | 12  | 0.731816  | 0.052652 | 77493568  | 77496500  | 77510011  | 77517691 |
| 256 NA19132 | [2515685 chr6 | 6 | 78986374  | 78987970  | 1597   | 4   | -0.467816 | 0.08796  | 78986211  | 78986537  | 78987700  | 78988241 |
| 257 NA19132 | [2515685 chr6 | 6 | 79023318  | 79093263  | 69946  | 70  | 0.763128  | 0.021583 | 79022028  | 79024609  | 79091909  | 79094611 |
| 258 NA19132 | [2515685 chr6 | 6 | 93631413  | 93637196  | 5784   | 6   | -0.891973 | 0.075671 | 93630862  | 93631964  | 93635493  | 93638891 |
| 259 NA19132 | [2515685 chr6 | 6 | 115422387 | 115424321 | 1935   | 2   | -1.32947  | 0.153091 | 115421781 | 115422994 | 115423780 | 11542486 |
| 260 NA19132 | [2515685 chr6 | 6 | 115435628 | 115450846 | 15219  | 11  | -0.429431 | 0.056409 | 115435436 | 115435820 | 115450464 | 11545122 |
| 261 NA19132 | [2515685 chr6 | 6 | 120671191 | 120671916 | 726    | 2   | 0.747791  | 0.124394 | 120670696 | 120671686 | 120671725 | 12067210 |
| 262 NA19132 | [2515685 chr6 | 6 | 160997684 | 161051768 | 54085  | 73  | 0.311328  | 0.02059  | 160997465 | 160997903 | 161051454 | 16105208 |
| 263 NA19132 | [2515685 chr6 | 6 | 162163383 | 162170538 | 7156   | 7   | -0.362125 | 0.066872 | 162162954 | 162163813 | 162169854 | 16217122 |
| 264 NA19132 | [2515685 chr6 | 6 | 167479669 | 167482583 | 2915   | 2   | 0.774434  | 0.124395 | 167479005 | 167480333 | 167482187 | 16748297 |
| 265 NA19132 | [2515685 chr6 | 6 | 167768770 | 167772941 | 4172   | 11  | 0.364669  | 0.053042 | 167768683 | 167768857 | 167772637 | 16777324 |
| 266 NA19132 | [2515685 chr6 | 6 | 168453011 | 168456762 | 3752   | 3   | 0.826296  | 0.101567 | 168452611 | 168453411 | 168456200 | 16845732 |
| 267 NA19132 | [2515685 chr6 | 6 | 170570659 | 170571491 | 833    | 7   | 0.360526  | 0.066491 | 170570596 | 170570723 | 170571251 | 17057173 |
| 268 NA19132 | [2515685 chr6 | 6 | 170603879 | 170604666 | 788    | 2   | -1.137121 | 0.124394 | 170603541 | 170604217 | 170604339 | 17060499 |
| 269 NA19132 | [2515685 chr6 | 6 | 170625506 | 170627028 | 1523   | 3   | 1.780208  | 0.111591 | 170625015 | 170625997 | 170626579 | 17062747 |
| 270 NA19132 | [2515685 chr6 | 6 | 170692529 | 170694780 | 2252   | 13  | 0.528702  | 0.048792 | 170692183 | 170692876 | 170694493 | 17069506 |
| 271 NA19132 | [2515685 chr7 | 7 | 106090    | 135257    | 29168  | 56  | 0.25604   | 0.023508 | 105852    | 106328    | 134958    | 135556   |
| 272 NA19132 | [2515685 chr7 | 7 | 166530    | 175565    | 9036   | 15  | 0.374511  | 0.045423 | 166251    | 166809    | 175292    | 175836   |
| 273 NA19132 | [2515685 chr7 | 7 | 3384111   | 3392457   | 8347   | 8   | 0.905639  | 0.062197 | 3383451   | 3384772   | 3390107   | 3395611  |
| 274 NA19132 | [2515685 chr7 | 7 | 14861623  | 14866192  | 4570   | 3   | -0.957613 | 0.101567 | 14860212  | 14863034  | 14864375  | 14868001 |
| 275 NA19132 | [2515685 chr7 | 7 | 19392964  | 19403725  | 10762  | 5   | -0.430829 | 0.079189 | 19392532  | 19393396  | 19401375  | 1945566  |
| 276 NA19132 | [2515685 chr7 | 7 | 43773800  | 43943924  | 170125 | 112 | 0.288995  | 0.016623 | 43773256  | 43774344  | 43941574  | 44020061 |
| 277 NA19132 | [2515685 chr7 | 7 | 56415683  | 56544240  | 128558 | 4   | -0.56145  | 0.08796  | 56286086  | 56418033  | 56542365  | 56546111 |
| 278 NA19132 | [2515685 chr7 | 7 | 56613863  | 56628513  | 14651  | 17  | -0.253241 | 0.043242 | 56613570  | 56614157  | 56628090  | 56628931 |
| 279 NA19132 | [2515685 chr7 | 7 | 57661653  | 57667912  | 6260   | 6   | -0.368352 | 0.071819 | 57661045  | 57662262  | 57667668  | 57668151 |
| 280 NA19132 | [2515685 chr7 | 7 | 62254472  | 62255088  | 617    | 4   | 0.48536   | 0.089298 | 62254309  | 62254635  | 62254924  | 62255251 |
| 281 NA19132 | [2515685 chr7 | 7 | 62302079  | 62302696  | 618    | 4   | 0.48537   | 0.089299 | 62301915  | 62302243  | 62302533  | 62302851 |
| 282 NA19132 | [2515685 chr7 | 7 | 63997159  | 64008697  | 11539  | 14  | 0.358623  | 0.047028 | 63996513  | 63997805  | 64008352  | 64009041 |
| 283 NA19132 | [2515685 chr7 | 7 | 64033071  | 64045487  | 12417  | 36  | -0.36856  | 0.02932  | 64032865  | 64033278  | 64045069  | 64045901 |
| 284 NA19132 | [2515685 chr7 | 7 | 64464087  | 64479903  | 15817  | 43  | -0.333905 | 0.026828 | 64463669  | 64464506  | 64479522  | 64480281 |

|             |               |   |           |           |        |     |           |          |           |           |           |          |
|-------------|---------------|---|-----------|-----------|--------|-----|-----------|----------|-----------|-----------|-----------|----------|
| 285 NA19132 | [2515685 chr7 | 7 | 64540847  | 64556662  | 15816  | 45  | -0.354128 | 0.026225 | 64540466  | 64541228  | 64556244  | 64557081 |
| 286 NA19132 | [2515685 chr7 | 7 | 64691204  | 64728286  | 37083  | 40  | 0.408798  | 0.028017 | 64690582  | 64691826  | 64726483  | 64730091 |
| 287 NA19132 | [2515685 chr7 | 7 | 69866390  | 69869623  | 3234   | 4   | 0.571191  | 0.087974 | 69865412  | 69867368  | 69869269  | 69869971 |
| 288 NA19132 | [2515685 chr7 | 7 | 69869623  | 69871056  | 1434   | 2   | 2.92941   | 0.1694   | 69869269  | 69869978  | 69870420  | 69871169 |
| 289 NA19132 | [2515685 chr7 | 7 | 71779202  | 71783096  | 3895   | 9   | 0.303834  | 0.05864  | 71779020  | 71779384  | 71782959  | 7178323  |
| 290 NA19132 | [2515685 chr7 | 7 | 71938916  | 71939766  | 851    | 5   | 0.432153  | 0.078674 | 71938731  | 71939101  | 71939618  | 7193991  |
| 291 NA19132 | [2515685 chr7 | 7 | 71965596  | 71967828  | 2233   | 8   | 0.314578  | 0.062197 | 71965586  | 71965607  | 71967680  | 71967971 |
| 292 NA19132 | [2515685 chr7 | 7 | 72014016  | 72014871  | 856    | 3   | 0.572444  | 0.101567 | 72013991  | 72014042  | 72014598  | 7201514  |
| 293 NA19132 | [2515685 chr7 | 7 | 73823778  | 73824682  | 905    | 4   | 0.48396   | 0.08796  | 73823755  | 73823801  | 73824463  | 7382490  |
| 294 NA19132 | [2515685 chr7 | 7 | 74096901  | 74097754  | 854    | 3   | 0.572448  | 0.101568 | 74096630  | 74097173  | 74097729  | 74097781 |
| 295 NA19132 | [2515685 chr7 | 7 | 74144095  | 74144944  | 850    | 5   | 0.432154  | 0.078674 | 74143947  | 74144243  | 74144759  | 7414512  |
| 296 NA19132 | [2515685 chr7 | 7 | 74511185  | 74511943  | 759    | 3   | 0.572448  | 0.101568 | 74511009  | 74511362  | 74511918  | 7451196  |
| 297 NA19132 | [2515685 chr7 | 7 | 74558360  | 74559208  | 849    | 5   | 0.432155  | 0.078674 | 74558212  | 74558508  | 74559023  | 7455939  |
| 298 NA19132 | [2515685 chr7 | 7 | 74586379  | 74587231  | 853    | 5   | 0.432154  | 0.078674 | 74586231  | 74586527  | 74587046  | 74587411 |
| 299 NA19132 | [2515685 chr7 | 7 | 74614403  | 74615250  | 848    | 5   | 0.432157  | 0.078674 | 74614255  | 74614551  | 74615065  | 7461543  |
| 300 NA19132 | [2515685 chr7 | 7 | 74772884  | 74776050  | 3167   | 9   | 0.346298  | 0.05864  | 74772787  | 74772982  | 74775644  | 7477645  |
| 301 NA19132 | [2515685 chr7 | 7 | 76336944  | 76338655  | 1712   | 2   | 0.722629  | 0.124395 | 76336621  | 76337268  | 76338090  | 76339221 |
| 302 NA19132 | [2515685 chr7 | 7 | 78448980  | 78498649  | 49670  | 53  | -0.876119 | 0.025047 | 78448496  | 78449465  | 78498134  | 7849916  |
| 303 NA19132 | [2515685 chr7 | 7 | 89455601  | 89456632  | 1032   | 2   | 3.782141  | 0.205466 | 89455373  | 89455830  | 89456225  | 8945703  |
| 304 NA19132 | [2515685 chr7 | 7 | 92971481  | 92978688  | 7208   | 5   | 0.521911  | 0.079301 | 92971060  | 92971903  | 92978221  | 9297915  |
| 305 NA19132 | [2515685 chr7 | 7 | 101688538 | 101925433 | 236896 | 314 | 0.330568  | 0.00994  | 101684772 | 101690888 | 101924670 | 10192619 |
| 306 NA19132 | [2515685 chr7 | 7 | 109034784 | 109048749 | 13966  | 10  | 2.017517  | 0.072448 | 109024063 | 109037134 | 109046953 | 10905054 |
| 307 NA19132 | [2515685 chr7 | 7 | 109776378 | 109782655 | 6278   | 5   | 0.837101  | 0.082384 | 109775821 | 109776936 | 109782301 | 10978301 |
| 308 NA19132 | [2515685 chr7 | 7 | 125639507 | 125644775 | 5269   | 6   | -0.829021 | 0.079809 | 125639054 | 125639961 | 125644046 | 12564550 |
| 309 NA19132 | [2515685 chr7 | 7 | 133241895 | 133257359 | 15465  | 16  | 2.105796  | 0.062971 | 133240782 | 133243008 | 133255009 | 13326093 |
| 310 NA19132 | [2515685 chr7 | 7 | 141496492 | 141499968 | 3477   | 3   | -0.74466  | 0.104368 | 141495918 | 141497066 | 141499762 | 14150017 |
| 311 NA19132 | [2515685 chr7 | 7 | 141505136 | 141521690 | 16555  | 20  | -1.329078 | 0.049151 | 141504428 | 141505844 | 141521412 | 14152196 |
| 312 NA19132 | [2515685 chr7 | 7 | 142739896 | 142772439 | 32544  | 31  | 0.302521  | 0.031596 | 142739886 | 142739906 | 142772239 | 14277263 |
| 313 NA19132 | [2515685 chr7 | 7 | 142899827 | 142955338 | 55512  | 68  | 0.264001  | 0.021334 | 142899357 | 142900297 | 142955130 | 14295554 |
| 314 NA19132 | [2515685 chr7 | 7 | 143320629 | 143417155 | 96527  | 172 | -0.685843 | 0.009238 | 143320373 | 143320886 | 143416975 | 14341733 |
| 315 NA19132 | [2515685 chr7 | 7 | 143420642 | 143512678 | 92037  | 184 | -0.685843 | 0.009238 | 143420120 | 143421165 | 143512168 | 14351318 |
| 316 NA19132 | [2515685 chr7 | 7 | 156987336 | 156989925 | 2590   | 7   | 0.40703   | 0.066491 | 156986734 | 156987939 | 156989607 | 15699024 |
| 317 NA19132 | [2515685 chr7 | 7 | 158207288 | 158209880 | 2593   | 2   | 0.82608   | 0.124395 | 158206344 | 158208233 | 158209333 | 15821042 |
| 318 NA19132 | [2515685 chr7 | 7 | 158617060 | 158624378 | 7319   | 6   | 0.728802  | 0.073654 | 158616763 | 158617357 | 158622028 | 15862672 |
| 319 NA19132 | [2515685 chr8 | 8 | 2202770   | 2204550   | 1781   | 4   | 0.493131  | 0.08796  | 2202506   | 2203034   | 2203659   | 220544   |
| 320 NA19132 | [2515685 chr8 | 8 | 2238733   | 2253794   | 15062  | 10  | -0.720718 | 0.055714 | 2233839   | 2241488   | 2251039   | 225752   |
| 321 NA19132 | [2515685 chr8 | 8 | 4110204   | 4112526   | 2323   | 2   | 3.880598  | 0.245313 | 4109692   | 4110717   | 4112031   | 411302   |
| 322 NA19132 | [2515685 chr8 | 8 | 4158964   | 4163289   | 4326   | 5   | -0.462041 | 0.079613 | 4158524   | 4159404   | 4162998   | 416358   |
| 323 NA19132 | [2515685 chr8 | 8 | 4951200   | 4952887   | 1688   | 3   | -0.511029 | 0.101568 | 4950948   | 4951452   | 4952599   | 495317   |
| 324 NA19132 | [2515685 chr8 | 8 | 5582875   | 5594011   | 11137  | 9   | 0.73052   | 0.05864  | 5582615   | 5583135   | 5592820   | 559520   |
| 325 NA19132 | [2515685 chr8 | 8 | 7097781   | 7146048   | 48268  | 203 | 0.360464  | 0.004317 | 7097278   | 7098285   | 7145836   | 714626   |
| 326 NA19132 | [2515685 chr8 | 8 | 7168547   | 7193580   | 25034  | 54  | 0.360464  | 0.004317 | 7168330   | 7168765   | 7193447   | 719371   |
| 327 NA19132 | [2515685 chr8 | 8 | 7222172   | 7431662   | 209491 | 422 | 0.360464  | 0.004317 | 7221921   | 7222423   | 7431162   | 743216   |
| 328 NA19132 | [2515685 chr8 | 8 | 7606320   | 7847279   | 240960 | 570 | 0.360464  | 0.004317 | 7605817   | 7606824   | 7846986   | 784757   |
| 329 NA19132 | [2515685 chr8 | 8 | 7861835   | 7881683   | 19849  | 48  | 0.360464  | 0.004317 | 7861646   | 7862024   | 7881466   | 788190   |
| 330 NA19132 | [2515685 chr8 | 8 | 7903980   | 7929654   | 25675  | 97  | 0.360464  | 0.004317 | 7903568   | 7904392   | 7929154   | 793015   |
| 331 NA19132 | [2515685 chr8 | 8 | 8191989   | 8193498   | 1510   | 2   | 0.662118  | 0.124395 | 8191773   | 8192206   | 8192899   | 819409   |
| 332 NA19132 | [2515685 chr8 | 8 | 12023134  | 12035788  | 12655  | 34  | 1.372291  | 0.030954 | 12022997  | 12023272  | 12035599  | 12035971 |
| 333 NA19132 | [2515685 chr8 | 8 | 12064826  | 12072445  | 7620   | 25  | 0.506129  | 0.035184 | 12064663  | 12064989  | 12072267  | 1207262  |
| 334 NA19132 | [2515685 chr8 | 8 | 12275692  | 12276602  | 911    | 2   | -0.696796 | 0.124395 | 12275477  | 12275908  | 12276206  | 1227699  |
| 335 NA19132 | [2515685 chr8 | 8 | 12276602  | 12284606  | 8005   | 15  | 1.251315  | 0.046148 | 12276206  | 12276998  | 12284461  | 1228475  |
| 336 NA19132 | [2515685 chr8 | 8 | 12314107  | 12321726  | 7620   | 22  | 0.487208  | 0.037506 | 12313944  | 12314270  | 12321548  | 1232190  |
| 337 NA19132 | [2515685 chr8 | 8 | 15233310  | 15235634  | 2325   | 2   | 0.632064  | 0.124394 | 15232721  | 15233900  | 15235038  | 1523623  |
| 338 NA19132 | [2515685 chr8 | 8 | 15700068  | 15703756  | 3689   | 2   | -0.628637 | 0.124394 | 15697436  | 15702700  | 15703434  | 1570407  |
| 339 NA19132 | [2515685 chr8 | 8 | 16245461  | 16251509  | 6049   | 6   | -0.737922 | 0.071819 | 16245129  | 16245794  | 16250812  | 1625220  |

|             |               |   |           |           |        |     |           |          |           |           |           |           |
|-------------|---------------|---|-----------|-----------|--------|-----|-----------|----------|-----------|-----------|-----------|-----------|
| 340 NA19132 | [2515685 chr8 | 8 | 16305945  | 16323850  | 17906  | 17  | -0.809418 | 0.043067 | 16304897  | 16306994  | 16323221  | 1632447!  |
| 341 NA19132 | [2515685 chr8 | 8 | 20022286  | 20024771  | 2486   | 2   | -1.08061  | 0.125753 | 20021082  | 20023491  | 20024338  | 2002520!  |
| 342 NA19132 | [2515685 chr8 | 8 | 22898972  | 22900547  | 1576   | 2   | 0.683509  | 0.124394 | 22898453  | 22899491  | 22900145  | 2290094!  |
| 343 NA19132 | [2515685 chr8 | 8 | 32799786  | 32810890  | 11105  | 12  | 2.309837  | 0.075844 | 32799314  | 32800259  | 32810654  | 3281112!  |
| 344 NA19132 | [2515685 chr8 | 8 | 39351178  | 39506673  | 155496 | 163 | 0.73447   | 0.014081 | 39350826  | 39351530  | 39505284  | 3950806!  |
| 345 NA19132 | [2515685 chr8 | 8 | 54001807  | 54002677  | 871    | 2   | -0.989783 | 0.130574 | 54001673  | 54001942  | 54002470  | 5400288!  |
| 346 NA19132 | [2515685 chr8 | 8 | 58278355  | 58287850  | 9496   | 8   | 1.618358  | 0.065284 | 58277116  | 58279595  | 58287616  | 5828808!  |
| 347 NA19132 | [2515685 chr8 | 8 | 58287850  | 58296106  | 8257   | 9   | 0.459987  | 0.058653 | 58287616  | 58288084  | 58295669  | 5829654!  |
| 348 NA19132 | [2515685 chr8 | 8 | 63378168  | 63387857  | 9690   | 14  | -0.729003 | 0.048527 | 63377712  | 63378624  | 63387483  | 6338823!  |
| 349 NA19132 | [2515685 chr8 | 8 | 65006548  | 65013851  | 7304   | 7   | -0.735636 | 0.070306 | 64946114  | 65009303  | 65013074  | 6501462!  |
| 350 NA19132 | [2515685 chr8 | 8 | 85423649  | 85431920  | 8272   | 7   | 0.869452  | 0.066491 | 85423043  | 85424256  | 85431347  | 8543249!  |
| 351 NA19132 | [2515685 chr8 | 8 | 86740195  | 86909771  | 169577 | 100 | 0.307902  | 0.017592 | 86739439  | 86740951  | 86909541  | 8691000!  |
| 352 NA19132 | [2515685 chr8 | 8 | 115009721 | 115012350 | 2630   | 4   | -0.443315 | 0.087961 | 115009261 | 115010182 | 115012053 | 11501264! |
| 353 NA19132 | [2515685 chr8 | 8 | 115148105 | 115149916 | 1812   | 2   | -1.07551  | 0.131382 | 115147694 | 115148517 | 115149348 | 11515048! |
| 354 NA19132 | [2515685 chr8 | 8 | 119999726 | 120003128 | 3403   | 2   | -1.051151 | 0.12514  | 119995336 | 120002481 | 120002653 | 12000360! |
| 355 NA19132 | [2515685 chr8 | 8 | 130809261 | 130824865 | 15605  | 3   | -0.53683  | 0.101568 | 130807000 | 130811522 | 130823894 | 13082583! |
| 356 NA19132 | [2515685 chr9 | 9 | 11350     | 34109     | 22760  | 43  | 0.253814  | 0.026828 | 11177     | 11524     | 32902     | 35316     |
| 357 NA19132 | [2515685 chr9 | 9 | 12462510  | 12465845  | 3336   | 2   | -0.713503 | 0.135906 | 12461944  | 12463076  | 12463483  | 1246884!  |
| 358 NA19132 | [2515685 chr9 | 9 | 21185196  | 21196545  | 11350  | 14  | -0.47809  | 0.047127 | 21185026  | 21185367  | 21196245  | 2119684!  |
| 359 NA19132 | [2515685 chr9 | 9 | 29127928  | 29135717  | 7790   | 6   | -0.366906 | 0.072274 | 29127566  | 29128290  | 29135457  | 2913597!  |
| 360 NA19132 | [2515685 chr9 | 9 | 30370008  | 30372069  | 2062   | 4   | -0.509444 | 0.08796  | 30369742  | 30370274  | 30371740  | 3037239!  |
| 361 NA19132 | [2515685 chr9 | 9 | 33607488  | 33608680  | 1193   | 2   | 0.827402  | 0.124395 | 33607283  | 33607694  | 33608420  | 3360894!  |
| 362 NA19132 | [2515685 chr9 | 9 | 33688323  | 33689560  | 1238   | 2   | -0.632142 | 0.124395 | 33687588  | 33689059  | 33689374  | 3368974!  |
| 363 NA19132 | [2515685 chr9 | 9 | 38781011  | 38797873  | 16863  | 9   | 0.345183  | 0.05864  | 38780851  | 38781171  | 38797288  | 3879845!  |
| 364 NA19132 | [2515685 chr9 | 9 | 38856017  | 38864486  | 8470   | 16  | -0.319915 | 0.044359 | 38849975  | 38858379  | 38864433  | 3886453!  |
| 365 NA19132 | [2515685 chr9 | 9 | 39141292  | 39271010  | 129719 | 235 | -0.335022 | 0.006804 | 39140975  | 39141609  | 39270743  | 3927127!  |
| 366 NA19132 | [2515685 chr9 | 9 | 39489226  | 39582261  | 93036  | 170 | -0.335022 | 0.006804 | 39489107  | 39489345  | 39581955  | 3958256!  |
| 367 NA19132 | [2515685 chr9 | 9 | 39813768  | 39815652  | 1885   | 3   | -0.671178 | 0.101567 | 39813502  | 39814035  | 39814733  | 3981657!  |
| 368 NA19132 | [2515685 chr9 | 9 | 40146093  | 40356832  | 210740 | 305 | -0.619054 | 0.010124 | 40145849  | 40146338  | 40356778  | 4035688!  |
| 369 NA19132 | [2515685 chr9 | 9 | 40545530  | 40545798  | 269    | 2   | -0.642917 | 0.125019 | 40545346  | 40545715  | 40545769  | 4054582!  |
| 370 NA19132 | [2515685 chr9 | 9 | 40617474  | 40620870  | 3397   | 5   | -0.490765 | 0.078674 | 40617281  | 40617668  | 40620620  | 4062112!  |
| 371 NA19132 | [2515685 chr9 | 9 | 41234952  | 41243367  | 8416   | 13  | -0.323471 | 0.049311 | 41234900  | 41235005  | 41241005  | 4124946!  |
| 372 NA19132 | [2515685 chr9 | 9 | 41649237  | 41651122  | 1886   | 3   | -0.671178 | 0.101567 | 41648318  | 41650157  | 41650855  | 4165138!  |
| 373 NA19132 | [2515685 chr9 | 9 | 42202554  | 42205849  | 3296   | 6   | -0.360718 | 0.071819 | 42202291  | 42202817  | 42205568  | 4220613!  |
| 374 NA19132 | [2515685 chr9 | 9 | 42645007  | 42646038  | 1032   | 2   | -0.800387 | 0.124395 | 42644851  | 42645163  | 42645769  | 4264630!  |
| 375 NA19132 | [2515685 chr9 | 9 | 42669198  | 42670938  | 1741   | 2   | -0.784278 | 0.124395 | 42668921  | 42669475  | 42670652  | 4267122!  |
| 376 NA19132 | [2515685 chr9 | 9 | 42754727  | 42756705  | 1979   | 3   | -1.132069 | 0.101568 | 42754385  | 42755070  | 42755767  | 4275764!  |
| 377 NA19132 | [2515685 chr9 | 9 | 42789875  | 42791615  | 1741   | 2   | -0.784278 | 0.124395 | 42789598  | 42790152  | 42791329  | 4279190!  |
| 378 NA19132 | [2515685 chr9 | 9 | 42875403  | 42877381  | 1979   | 3   | -1.132069 | 0.101568 | 42875061  | 42875746  | 42876443  | 4287832!  |
| 379 NA19132 | [2515685 chr9 | 9 | 43057976  | 43060535  | 2560   | 4   | -0.605396 | 0.08796  | 43056542  | 43059411  | 43060020  | 4306105!  |
| 380 NA19132 | [2515685 chr9 | 9 | 43065211  | 43066832  | 1622   | 2   | -2.884237 | 0.198098 | 43064261  | 43066162  | 43066646  | 4306701!  |
| 381 NA19132 | [2515685 chr9 | 9 | 43097020  | 43097900  | 881    | 4   | -0.495082 | 0.08796  | 43096964  | 43097077  | 43097807  | 4309799!  |
| 382 NA19132 | [2515685 chr9 | 9 | 43098818  | 43213436  | 114619 | 245 | -0.654825 | 0.011313 | 43098735  | 43098901  | 43213301  | 4321357!  |
| 383 NA19132 | [2515685 chr9 | 9 | 43457901  | 43464305  | 6405   | 8   | 0.347498  | 0.062197 | 43457689  | 43458113  | 43463943  | 4346466!  |
| 384 NA19132 | [2515685 chr9 | 9 | 43485670  | 43492164  | 6495   | 9   | 0.336584  | 0.05864  | 43485165  | 43486176  | 43491952  | 4349237!  |
| 385 NA19132 | [2515685 chr9 | 9 | 43507114  | 43507884  | 771    | 3   | -0.513659 | 0.101568 | 43506608  | 43507620  | 43507687  | 4350808!  |
| 386 NA19132 | [2515685 chr9 | 9 | 43608585  | 43609528  | 944    | 2   | -0.744535 | 0.124395 | 43608266  | 43608905  | 43609211  | 4360984!  |
| 387 NA19132 | [2515685 chr9 | 9 | 43720039  | 43721070  | 1032   | 2   | -0.800387 | 0.124395 | 43719883  | 43720195  | 43720801  | 4372133!  |
| 388 NA19132 | [2515685 chr9 | 9 | 43744237  | 43745976  | 1740   | 2   | -0.784278 | 0.124395 | 43743960  | 43744514  | 43745690  | 4374626!  |
| 389 NA19132 | [2515685 chr9 | 9 | 43885522  | 43886459  | 938    | 2   | 0.646142  | 0.124395 | 43885267  | 43885778  | 43886107  | 4388681!  |
| 390 NA19132 | [2515685 chr9 | 9 | 43941891  | 43943985  | 2095   | 6   | 0.461412  | 0.071819 | 43941695  | 43942087  | 43943754  | 4394421!  |
| 391 NA19132 | [2515685 chr9 | 9 | 44185625  | 44189590  | 3966   | 9   | 0.310247  | 0.05864  | 44185383  | 44185867  | 44188800  | 4419038!  |
| 392 NA19132 | [2515685 chr9 | 9 | 44678564  | 44680583  | 2020   | 4   | 0.617665  | 0.08796  | 44678361  | 44678768  | 44680330  | 4468083!  |
| 393 NA19132 | [2515685 chr9 | 9 | 44928853  | 44931216  | 2364   | 5   | 0.646902  | 0.078674 | 44928333  | 44929374  | 44931007  | 4493142!  |
| 394 NA19132 | [2515685 chr9 | 9 | 45456401  | 45493025  | 36625  | 11  | 0.345553  | 0.053042 | 45455127  | 45457675  | 45490663  | 4549826!  |

|             |                |    |           |           |         |      |           |          |           |           |           |          |
|-------------|----------------|----|-----------|-----------|---------|------|-----------|----------|-----------|-----------|-----------|----------|
| 395 NA19132 | [2515685 chr9  | 9  | 64290263  | 64291206  | 944     | 2    | -0.744535 | 0.124395 | 64289944  | 64290583  | 64290889  | 6429152: |
| 396 NA19132 | [2515685 chr9  | 9  | 66047392  | 66055802  | 8411    | 14   | -0.317258 | 0.047481 | 66047340  | 66047445  | 66053440  | 6606190: |
| 397 NA19132 | [2515685 chr9  | 9  | 66110120  | 66133327  | 23208   | 19   | 0.31356   | 0.041174 | 66109969  | 66110272  | 66133030  | 6613362: |
| 398 NA19132 | [2515685 chr9  | 9  | 76777070  | 76779384  | 2315    | 2    | 0.832767  | 0.124394 | 76776756  | 76777385  | 76778920  | 7677984: |
| 399 NA19132 | [2515685 chr9  | 9  | 76785489  | 76787598  | 2110    | 2    | -1.070775 | 0.125034 | 76785038  | 76785941  | 76787269  | 7678792: |
| 400 NA19132 | [2515685 chr9  | 9  | 80594402  | 80595587  | 1186    | 2    | -0.972051 | 0.12568  | 80594078  | 80594727  | 80595307  | 8059586: |
| 401 NA19132 | [2515685 chr9  | 9  | 87295206  | 87296948  | 1743    | 2    | -0.849734 | 0.125526 | 87294771  | 87295642  | 87296539  | 8729735: |
| 402 NA19132 | [2515685 chr9  | 9  | 138315359 | 138406748 | 91390   | 105  | 0.271841  | 0.017168 | 138315210 | 138315508 | 138406510 | 13840698 |
| 403 NA19132 | [2515685 chr10 | 10 | 5689526   | 5758557   | 69032   | 86   | 0.441366  | 0.019033 | 5689135   | 5689917   | 5757181   | 575993:  |
| 404 NA19132 | [2515685 chr10 | 10 | 6693908   | 6703893   | 9986    | 8    | 0.750508  | 0.063123 | 6692231   | 6695585   | 6703779   | 6704008  |
| 405 NA19132 | [2515685 chr10 | 10 | 42559247  | 42565662  | 6416    | 10   | -0.489784 | 0.055631 | 42558647  | 42559848  | 42565423  | 4256590: |
| 406 NA19132 | [2515685 chr10 | 10 | 45494243  | 45522663  | 28421   | 65   | -0.275447 | 0.02182  | 45494187  | 45494299  | 45522146  | 4552318: |
| 407 NA19132 | [2515685 chr10 | 10 | 46103623  | 47239593  | 1135971 | 1825 | -0.273343 | 0.003457 | 46103207  | 46104040  | 47239400  | 4723978: |
| 408 NA19132 | [2515685 chr10 | 10 | 47577933  | 47895873  | 317941  | 503  | -0.273343 | 0.003457 | 47575187  | 47725982  | 47895597  | 4789614: |
| 409 NA19132 | [2515685 chr10 | 10 | 48490524  | 48942132  | 451609  | 701  | -0.284189 | 0.006645 | 48490108  | 48490941  | 48941736  | 4894252: |
| 410 NA19132 | [2515685 chr10 | 10 | 50894581  | 50916442  | 21862   | 54   | -0.275261 | 0.02394  | 50894321  | 50894841  | 50916386  | 5091649: |
| 411 NA19132 | [2515685 chr10 | 10 | 51067559  | 51156234  | 88676   | 82   | -0.296147 | 0.019427 | 51067485  | 51067634  | 51156178  | 5115629: |
| 412 NA19132 | [2515685 chr10 | 10 | 51186006  | 51187734  | 1729    | 2    | -0.905627 | 0.124395 | 51185282  | 51186730  | 51187158  | 5118831: |
| 413 NA19132 | [2515685 chr10 | 10 | 55042256  | 55129021  | 86766   | 81   | -0.80054  | 0.019944 | 55041866  | 55042646  | 55128207  | 5512983: |
| 414 NA19132 | [2515685 chr10 | 10 | 56117212  | 56139275  | 22064   | 20   | -1.006239 | 0.039891 | 56115764  | 56118661  | 56138931  | 5613961: |
| 415 NA19132 | [2515685 chr10 | 10 | 58514843  | 58519516  | 4674    | 6    | -0.374079 | 0.07182  | 58514705  | 58514982  | 58519358  | 5851967: |
| 416 NA19132 | [2515685 chr10 | 10 | 75103397  | 75127249  | 23853   | 32   | -0.271346 | 0.031099 | 75102599  | 75104195  | 75126882  | 7512761: |
| 417 NA19132 | [2515685 chr10 | 10 | 81554504  | 81575212  | 20709   | 25   | -0.266058 | 0.035184 | 81554236  | 81554773  | 81575002  | 8157542: |
| 418 NA19132 | [2515685 chr10 | 10 | 81662330  | 81668479  | 6150    | 9    | -0.430985 | 0.05864  | 81662046  | 81662614  | 81668415  | 8166854: |
| 419 NA19132 | [2515685 chr10 | 10 | 88823459  | 88836422  | 12964   | 17   | -0.354317 | 0.042667 | 88823233  | 88823685  | 88835452  | 8883739: |
| 420 NA19132 | [2515685 chr10 | 10 | 88866216  | 88962817  | 96602   | 106  | -0.41358  | 0.017121 | 88865617  | 88866816  | 88962401  | 8896323: |
| 421 NA19132 | [2515685 chr10 | 10 | 89144692  | 89179870  | 35179   | 53   | -0.338531 | 0.024204 | 89144420  | 89144965  | 89179587  | 8918015: |
| 422 NA19132 | [2515685 chr10 | 10 | 122760140 | 122777315 | 17176   | 11   | -0.705515 | 0.053222 | 122759805 | 122760476 | 122776760 | 1227778: |
| 423 NA19132 | [2515685 chr10 | 10 | 124336365 | 124341749 | 5385    | 6    | 0.969426  | 0.07215  | 124335581 | 124337149 | 124341238 | 12434226 |
| 424 NA19132 | [2515685 chr10 | 10 | 124345789 | 124348266 | 2478    | 3    | 0.563039  | 0.01568  | 124345154 | 124346424 | 124348238 | 12434829 |
| 425 NA19132 | [2515685 chr10 | 10 | 125208743 | 125210864 | 2122    | 2    | 0.640302  | 0.124394 | 125208363 | 125209123 | 125210368 | 12521136 |
| 426 NA19132 | [2515685 chr10 | 10 | 129048824 | 129051127 | 2304    | 2    | -0.839636 | 0.153182 | 129048372 | 129049276 | 129050257 | 12905199 |
| 427 NA19132 | [2515685 chr10 | 10 | 134168766 | 134170259 | 1494    | 17   | -0.801444 | 0.042667 | 134168524 | 134169008 | 134170097 | 13417042 |
| 428 NA19132 | [2515685 chr10 | 10 | 134924761 | 134926337 | 1577    | 16   | 0.644483  | 0.04398  | 134924706 | 134924816 | 134926184 | 13492649 |
| 429 NA19132 | [2515685 chr10 | 10 | 135239047 | 135395222 | 156176  | 129  | 0.294497  | 0.015493 | 135238472 | 135239623 | 135394862 | 13539558 |
| 430 NA19132 | [2515685 chr11 | 11 | 723603    | 735501    | 11899   | 5    | -0.456734 | 0.078674 | 723363    | 723843    | 734076    | 73692:   |
| 431 NA19132 | [2515685 chr11 | 11 | 754804    | 761140    | 6337    | 5    | 0.393447  | 0.078674 | 754327    | 755282    | 760250    | 762031   |
| 432 NA19132 | [2515685 chr11 | 11 | 2999681   | 3137580   | 137900  | 2    | -0.925747 | 0.124395 | 2949255   | 3002762   | 3134499   | 317326:  |
| 433 NA19132 | [2515685 chr11 | 11 | 3222433   | 3316109   | 93677   | 109  | 0.589481  | 0.01685  | 3213200   | 3225514   | 3315778   | 331644:  |
| 434 NA19132 | [2515685 chr11 | 11 | 3597614   | 3602209   | 4596    | 6    | 0.391507  | 0.071819 | 3597275   | 3597954   | 3601914   | 360250:  |
| 435 NA19132 | [2515685 chr11 | 11 | 3628748   | 3632795   | 4048    | 6    | -1.031901 | 0.071819 | 3625722   | 3631775   | 3632594   | 363299:  |
| 436 NA19132 | [2515685 chr11 | 11 | 4924831   | 4933540   | 8710    | 9    | -2.404529 | 0.077485 | 4924403   | 4925260   | 4933251   | 493383:  |
| 437 NA19132 | [2515685 chr11 | 11 | 5717038   | 5718491   | 1454    | 2    | 3.572681  | 0.213799 | 5716660   | 5717416   | 5718038   | 571894:  |
| 438 NA19132 | [2515685 chr11 | 11 | 5741269   | 5765993   | 24725   | 33   | 1.669066  | 0.042227 | 5741059   | 5741480   | 5765632   | 576635:  |
| 439 NA19132 | [2515685 chr11 | 11 | 11831868  | 11833089  | 1222    | 2    | 0.865456  | 0.147693 | 11831412  | 11832324  | 11832853  | 1183332: |
| 440 NA19132 | [2515685 chr11 | 11 | 18906905  | 18928671  | 21767   | 30   | 0.746719  | 0.032446 | 18906533  | 18907278  | 18928457  | 1892888: |
| 441 NA19132 | [2515685 chr11 | 11 | 25658875  | 25671969  | 13095   | 17   | -0.81742  | 0.044273 | 25658601  | 25659149  | 25670759  | 2567317: |
| 442 NA19132 | [2515685 chr11 | 11 | 28965605  | 28968821  | 3217    | 4    | 2.058217  | 0.154072 | 28965284  | 28965927  | 28967972  | 2896967: |
| 443 NA19132 | [2515685 chr11 | 11 | 48284073  | 48284771  | 699     | 2    | 1.119221  | 0.124394 | 48283862  | 48284285  | 48284572  | 4828497: |
| 444 NA19132 | [2515685 chr11 | 11 | 49038483  | 49054900  | 16418   | 38   | -0.396164 | 0.028538 | 49038280  | 49038687  | 49054705  | 4905509: |
| 445 NA19132 | [2515685 chr11 | 11 | 49348562  | 49358057  | 9496    | 8    | -0.339265 | 0.062197 | 49348121  | 49349003  | 49357772  | 4935834: |
| 446 NA19132 | [2515685 chr11 | 11 | 49668606  | 49715829  | 47224   | 33   | 0.386276  | 0.030871 | 49668327  | 49668886  | 49712748  | 4972198: |
| 447 NA19132 | [2515685 chr11 | 11 | 54977173  | 54979405  | 2233    | 2    | -0.682625 | 0.124394 | 54976212  | 54978135  | 54979178  | 5497963: |
| 448 NA19132 | [2515685 chr11 | 11 | 60721034  | 60777477  | 56444   | 74   | 0.431215  | 0.020479 | 60720112  | 60721956  | 60776810  | 6077814: |
| 449 NA19132 | [2515685 chr11 | 11 | 73815147  | 73817979  | 2833    | 2    | -0.664712 | 0.124395 | 73812981  | 73817313  | 73817746  | 7381821: |

|             |                |    |           |           |        |     |                    |           |           |           |          |
|-------------|----------------|----|-----------|-----------|--------|-----|--------------------|-----------|-----------|-----------|----------|
| 450 NA19132 | [2515685 chr11 | 11 | 81353340  | 81355813  | 2474   | 2   | -0.978782 0.130621 | 81353009  | 81353672  | 81353989  | 81357631 |
| 451 NA19132 | [2515685 chr11 | 11 | 84862788  | 84864160  | 1373   | 2   | -0.651608 0.127624 | 84862397  | 84863179  | 84863730  | 84864591 |
| 452 NA19132 | [2515685 chr11 | 11 | 85981700  | 85984113  | 2414   | 3   | -0.705004 0.101568 | 85981147  | 85982254  | 85983791  | 85984431 |
| 453 NA19132 | [2515685 chr11 | 11 | 89116121  | 89154873  | 38753  | 50  | -0.35093 0.024904  | 89115895  | 89116348  | 89154457  | 89155291 |
| 454 NA19132 | [2515685 chr11 | 11 | 89184898  | 89189792  | 4895   | 5   | 0.585149 0.086319  | 89184243  | 89185554  | 89189177  | 89190401 |
| 455 NA19132 | [2515685 chr11 | 11 | 89427489  | 89477435  | 49947  | 59  | -0.386014 0.022903 | 89427192  | 89427786  | 89477160  | 89477771 |
| 456 NA19132 | [2515685 chr11 | 11 | 104427891 | 104437123 | 9233   | 11  | -0.699249 0.055207 | 104425560 | 104430223 | 104436554 | 10443769 |
| 457 NA19132 | [2515685 chr11 | 11 | 106744846 | 106747471 | 2626   | 7   | -2.992101 0.108826 | 106744561 | 106745131 | 106747267 | 10674767 |
| 458 NA19132 | [2515685 chr11 | 11 | 134107699 | 134112290 | 4592   | 5   | 0.737594 0.083223  | 134106591 | 134108808 | 134111845 | 13411273 |
| 459 NA19132 | [2515685 chr12 | 12 | 737102    | 744802    | 7701   | 8   | 0.984484 0.062197  | 736616    | 737588    | 744211    | 745394   |
| 460 NA19132 | [2515685 chr12 | 12 | 2112534   | 2127044   | 14511  | 15  | 0.715674 0.046138  | 2109107   | 2115961   | 2126809   | 2127275  |
| 461 NA19132 | [2515685 chr12 | 12 | 6110940   | 6118188   | 7249   | 5   | 0.584391 0.081302  | 6110241   | 6111640   | 61117816  | 6118567  |
| 462 NA19132 | [2515685 chr12 | 12 | 6515809   | 6517225   | 1417   | 2   | 0.644228 0.124395  | 6515512   | 6516107   | 6516943   | 6517508  |
| 463 NA19132 | [2515685 chr12 | 12 | 8262986   | 8270350   | 7365   | 18  | 0.524441 0.041465  | 8262374   | 8263598   | 8269654   | 8271046  |
| 464 NA19132 | [2515685 chr12 | 12 | 9552264   | 9555463   | 3200   | 4   | 0.572718 0.10997   | 9551979   | 9552549   | 9555119   | 9555808  |
| 465 NA19132 | [2515685 chr12 | 12 | 11080832  | 11083764  | 2933   | 5   | -0.715268 0.078674 | 11080446  | 11081219  | 11083559  | 11083961 |
| 466 NA19132 | [2515685 chr12 | 12 | 11109926  | 11112902  | 2977   | 5   | -0.911169 0.078674 | 11109784  | 11110068  | 11112601  | 11113201 |
| 467 NA19132 | [2515685 chr12 | 12 | 11172445  | 11177210  | 4766   | 3   | -0.914961 0.101568 | 11172159  | 11172731  | 11176908  | 11177511 |
| 468 NA19132 | [2515685 chr12 | 12 | 11316987  | 11322786  | 5800   | 8   | -0.314079 0.062197 | 11316630  | 11317345  | 11322352  | 11323221 |
| 469 NA19132 | [2515685 chr12 | 12 | 11398049  | 11463223  | 65175  | 66  | -0.360121 0.021655 | 11397507  | 11398591  | 11459990  | 11466451 |
| 470 NA19132 | [2515685 chr12 | 12 | 22462548  | 22477653  | 15106  | 8   | 1.033156 0.069025  | 22461792  | 22463304  | 22474599  | 22480701 |
| 471 NA19132 | [2515685 chr12 | 12 | 34090675  | 34099143  | 8469   | 3   | -0.577198 0.108439 | 34090404  | 34090947  | 34098927  | 34099361 |
| 472 NA19132 | [2515685 chr12 | 12 | 34099919  | 34108168  | 8250   | 12  | -0.721743 0.053212 | 34099639  | 34100199  | 34107972  | 34108361 |
| 473 NA19132 | [2515685 chr12 | 12 | 36729609  | 36737753  | 8145   | 15  | 0.2547 0.045423    | 36729059  | 36730159  | 36736974  | 36738531 |
| 474 NA19132 | [2515685 chr12 | 12 | 36799262  | 36816347  | 17086  | 10  | -0.317871 0.055631 | 36797896  | 36800628  | 36814922  | 36817771 |
| 475 NA19132 | [2515685 chr12 | 12 | 36886168  | 36890395  | 4228   | 5   | -0.446722 0.078674 | 36886078  | 36886259  | 36887282  | 36893501 |
| 476 NA19132 | [2515685 chr12 | 12 | 69156919  | 69167889  | 10971  | 11  | 0.773467 0.053129  | 69138649  | 69160412  | 69164396  | 69215011 |
| 477 NA19132 | [2515685 chr12 | 12 | 70474531  | 70476812  | 2282   | 3   | -0.624331 0.101568 | 70473883  | 70475180  | 70476524  | 70477101 |
| 478 NA19132 | [2515685 chr12 | 12 | 78656134  | 78665261  | 9128   | 9   | -0.668084 0.058833 | 78654687  | 78657582  | 78664736  | 78665781 |
| 479 NA19132 | [2515685 chr12 | 12 | 87515000  | 87518489  | 3490   | 4   | -0.599064 0.087961 | 87514326  | 87515675  | 87517571  | 87519401 |
| 480 NA19132 | [2515685 chr12 | 12 | 98296195  | 98302023  | 5829   | 12  | -0.777226 0.052657 | 98295885  | 98296506  | 98298530  | 98305941 |
| 481 NA19132 | [2515685 chr12 | 12 | 129395501 | 129403321 | 7821   | 20  | 0.255184 0.039337  | 129395008 | 129395994 | 129403022 | 12940362 |
| 482 NA19132 | [2515685 chr12 | 12 | 130315291 | 130316322 | 1032   | 11  | -0.348401 0.053042 | 130315089 | 130315493 | 130316261 | 13031638 |
| 483 NA19132 | [2515685 chr13 | 13 | 18217757  | 18277248  | 59492  | 20  | 0.278312 0.039337  | 18217719  | 18217795  | 18275111  | 18279381 |
| 484 NA19132 | [2515685 chr13 | 13 | 25947233  | 25950398  | 3166   | 3   | 3.289426 0.153485  | 25946194  | 25948272  | 25949415  | 25951381 |
| 485 NA19132 | [2515685 chr13 | 13 | 31430484  | 31437209  | 6726   | 7   | -0.702955 0.069111 | 31430130  | 31430838  | 31436488  | 31437931 |
| 486 NA19132 | [2515685 chr13 | 13 | 33036334  | 33042392  | 6059   | 6   | 0.74576 0.073929   | 33034735  | 33037934  | 33041860  | 33042921 |
| 487 NA19132 | [2515685 chr13 | 13 | 56611711  | 56645734  | 34024  | 47  | 0.362693 0.025661  | 56610946  | 56612477  | 56645321  | 56646141 |
| 488 NA19132 | [2515685 chr13 | 13 | 56763761  | 56786965  | 23205  | 32  | -0.805225 0.031746 | 56762436  | 56765086  | 56786732  | 56787191 |
| 489 NA19132 | [2515685 chr13 | 13 | 63291138  | 63299379  | 8242   | 6   | -0.408518 0.076063 | 63290403  | 63291874  | 63299162  | 63299591 |
| 490 NA19132 | [2515685 chr13 | 13 | 69633905  | 69673289  | 39385  | 42  | 0.7361 0.027734    | 69633412  | 69634399  | 69672985  | 69673591 |
| 491 NA19132 | [2515685 chr13 | 13 | 88249771  | 88255014  | 5244   | 6   | -0.421389 0.072811 | 88248289  | 88251253  | 88254657  | 88255371 |
| 492 NA19132 | [2515685 chr13 | 13 | 109215660 | 109217089 | 1430   | 5   | 0.739935 0.078674  | 109215230 | 109216090 | 109216885 | 10921729 |
| 493 NA19132 | [2515685 chr13 | 13 | 112715426 | 112718269 | 2844   | 3   | -0.519939 0.101567 | 112715006 | 112715846 | 112717694 | 11271884 |
| 494 NA19132 | [2515685 chr13 | 13 | 113079647 | 113081814 | 2168   | 2   | 0.847353 0.124394  | 113078890 | 113080404 | 113081491 | 11308213 |
| 495 NA19132 | [2515685 chr14 | 14 | 18437470  | 18754227  | 316758 | 481 | -0.470934 0.004736 | 18437443  | 18437497  | 18754075  | 18754381 |
| 496 NA19132 | [2515685 chr14 | 14 | 18756820  | 18826909  | 70090  | 140 | -0.470934 0.004736 | 18756797  | 18756843  | 18826790  | 18827021 |
| 497 NA19132 | [2515685 chr14 | 14 | 18856291  | 19143339  | 287049 | 521 | -0.470934 0.004736 | 18855875  | 18856707  | 19143095  | 19143581 |
| 498 NA19132 | [2515685 chr14 | 14 | 19145876  | 19261218  | 115343 | 189 | -0.470934 0.004736 | 19145143  | 19146610  | 19260776  | 19261661 |
| 499 NA19132 | [2515685 chr14 | 14 | 19381311  | 19392300  | 10990  | 11  | -0.290846 0.053316 | 19381022  | 19381601  | 19389484  | 19395111 |
| 500 NA19132 | [2515685 chr14 | 14 | 19619354  | 19625484  | 6131   | 3   | 3.595363 0.221917  | 19612261  | 19624114  | 19625018  | 19625951 |
| 501 NA19132 | [2515685 chr14 | 14 | 32022775  | 32026140  | 3366   | 2   | -0.829957 0.124394 | 32022274  | 32023276  | 32023749  | 32028531 |
| 502 NA19132 | [2515685 chr14 | 14 | 40894311  | 40897984  | 3674   | 4   | -0.608145 0.099818 | 40893608  | 40895015  | 40897618  | 40898351 |
| 503 NA19132 | [2515685 chr14 | 14 | 41982987  | 41990026  | 7040   | 7   | -0.421955 0.066491 | 41982609  | 41983366  | 41989626  | 41990421 |
| 504 NA19132 | [2515685 chr14 | 14 | 73074249  | 73082987  | 8739   | 11  | -0.447111 0.057776 | 73073800  | 73074699  | 73082782  | 73083191 |

|             |                |    |           |           |        |     |           |          |           |           |           |           |
|-------------|----------------|----|-----------|-----------|--------|-----|-----------|----------|-----------|-----------|-----------|-----------|
| 505 NA19132 | [2515685 chr14 | 14 | 73102892  | 73110687  | 7796   | 6   | 0.516767  | 0.071819 | 73101149  | 73104635  | 73110054  | 73111321  |
| 506 NA19132 | [2515685 chr14 | 14 | 104766812 | 104778505 | 11694  | 145 | -0.811855 | 0.014609 | 104766457 | 104767167 | 104778286 | 10477872  |
| 507 NA19132 | [2515685 chr15 | 15 | 18410351  | 18430991  | 20641  | 16  | 0.320197  | 0.04398  | 18410066  | 18410637  | 18430684  | 18431291  |
| 508 NA19132 | [2515685 chr15 | 15 | 18458940  | 18468372  | 9433   | 6   | -0.866267 | 0.071922 | 18458212  | 18459669  | 18467866  | 18468871  |
| 509 NA19132 | [2515685 chr15 | 15 | 18486535  | 18488401  | 1867   | 2   | -0.690119 | 0.124395 | 18486285  | 18486785  | 18488204  | 18488591  |
| 510 NA19132 | [2515685 chr15 | 15 | 18842373  | 18849369  | 6997   | 12  | 0.415169  | 0.050784 | 18842153  | 18842593  | 18848726  | 18850011  |
| 511 NA19132 | [2515685 chr15 | 15 | 19090947  | 19483838  | 392892 | 486 | -0.327199 | 0.00801  | 19090386  | 19091509  | 19483299  | 19484371  |
| 512 NA19132 | [2515685 chr15 | 15 | 19497904  | 19507504  | 9601   | 11  | -0.386274 | 0.053042 | 19497654  | 19498154  | 19505201  | 19519921  |
| 513 NA19132 | [2515685 chr15 | 15 | 19662452  | 19800430  | 137979 | 49  | -0.281129 | 0.025388 | 19662119  | 19662785  | 19800199  | 19800661  |
| 514 NA19132 | [2515685 chr15 | 15 | 19840090  | 19846522  | 6433   | 12  | 0.572994  | 0.050784 | 19839894  | 19840287  | 19845941  | 19847110  |
| 515 NA19132 | [2515685 chr15 | 15 | 20229743  | 20235183  | 5441   | 12  | -0.354693 | 0.050784 | 20229703  | 20229783  | 20234875  | 20235491  |
| 516 NA19132 | [2515685 chr15 | 15 | 20367533  | 20383831  | 16299  | 18  | -0.405433 | 0.042175 | 20367145  | 20367922  | 20383079  | 20384581  |
| 517 NA19132 | [2515685 chr15 | 15 | 20730059  | 20733468  | 3410   | 6   | -0.547501 | 0.071819 | 20729790  | 20730328  | 20733199  | 20733731  |
| 518 NA19132 | [2515685 chr15 | 15 | 20757759  | 20759072  | 1314   | 2   | -0.763262 | 0.124395 | 20757317  | 20758201  | 20758981  | 20759161  |
| 519 NA19132 | [2515685 chr15 | 15 | 20761011  | 20762532  | 1522   | 2   | -0.825033 | 0.137781 | 20760941  | 20761082  | 20762228  | 20762831  |
| 520 NA19132 | [2515685 chr15 | 15 | 21049779  | 21054996  | 5218   | 7   | -0.496863 | 0.066491 | 21049217  | 21050342  | 21052693  | 21060341  |
| 521 NA19132 | [2515685 chr15 | 15 | 21160882  | 21163065  | 2184   | 7   | -0.392565 | 0.066492 | 21160864  | 21160900  | 21162916  | 21163211  |
| 522 NA19132 | [2515685 chr15 | 15 | 21606753  | 21614601  | 7849   | 7   | 0.905924  | 0.075064 | 21606459  | 21607047  | 21612298  | 21636691  |
| 523 NA19132 | [2515685 chr15 | 15 | 22658900  | 22662230  | 3331   | 2   | -0.9105   | 0.125046 | 22658494  | 22659306  | 22659927  | 22669491  |
| 524 NA19132 | [2515685 chr15 | 15 | 24986053  | 24992250  | 6198   | 7   | 0.718737  | 0.067083 | 24985426  | 24986680  | 24991680  | 24992821  |
| 525 NA19132 | [2515685 chr15 | 15 | 25290181  | 25291621  | 1441   | 4   | -0.518804 | 0.087961 | 25289965  | 25290398  | 25291447  | 25291791  |
| 526 NA19132 | [2515685 chr15 | 15 | 26331076  | 26343818  | 12743  | 26  | -0.392502 | 0.034501 | 26330888  | 26331265  | 26342288  | 26345341  |
| 527 NA19132 | [2515685 chr15 | 15 | 26371969  | 26372587  | 619    | 2   | -0.696163 | 0.124395 | 26371649  | 26372290  | 26372316  | 26372851  |
| 528 NA19132 | [2515685 chr15 | 15 | 26506352  | 26506969  | 618    | 2   | -0.696161 | 0.124395 | 26506081  | 26506623  | 26506649  | 26507291  |
| 529 NA19132 | [2515685 chr15 | 15 | 26538169  | 26543618  | 5450   | 12  | -0.400689 | 0.050784 | 26538129  | 26538209  | 26543314  | 26543921  |
| 530 NA19132 | [2515685 chr15 | 15 | 26697710  | 26700617  | 2908   | 11  | -0.329659 | 0.053042 | 26697414  | 26698006  | 26700567  | 26700661  |
| 531 NA19132 | [2515685 chr15 | 15 | 26810103  | 26812035  | 1933   | 4   | -0.592027 | 0.08796  | 26809863  | 26810344  | 26811553  | 26812511  |
| 532 NA19132 | [2515685 chr15 | 15 | 28172379  | 28747343  | 574965 | 990 | -0.261461 | 0.0056   | 28172136  | 28172622  | 28746570  | 28748111  |
| 533 NA19132 | [2515685 chr15 | 15 | 30249124  | 30252620  | 3497   | 5   | -0.514831 | 0.078674 | 30248751  | 30249498  | 30252475  | 30252761  |
| 534 NA19132 | [2515685 chr15 | 15 | 30274750  | 30688085  | 413336 | 700 | -0.256413 | 0.006662 | 30274702  | 30274799  | 30686799  | 30689371  |
| 535 NA19132 | [2515685 chr15 | 15 | 32470141  | 32495147  | 25007  | 28  | 0.253161  | 0.033246 | 32469858  | 32470425  | 32494339  | 32495951  |
| 536 NA19132 | [2515685 chr15 | 15 | 32497333  | 32592621  | 95289  | 84  | 0.535103  | 0.019493 | 32497111  | 32497556  | 32592260  | 32592981  |
| 537 NA19132 | [2515685 chr15 | 15 | 41775760  | 41777132  | 1373   | 2   | 0.718829  | 0.124395 | 41775441  | 41776080  | 41776863  | 41777401  |
| 538 NA19132 | [2515685 chr15 | 15 | 42905678  | 42906197  | 520    | 2   | -0.871826 | 0.124394 | 42905469  | 42905888  | 42905981  | 42906411  |
| 539 NA19132 | [2515685 chr15 | 15 | 43105562  | 43111174  | 5613   | 7   | 0.41557   | 0.066492 | 43105206  | 43105919  | 43111071  | 43111271  |
| 540 NA19132 | [2515685 chr15 | 15 | 43153369  | 43154013  | 645    | 2   | -0.871839 | 0.124395 | 43153155  | 43153584  | 43153678  | 43154341  |
| 541 NA19132 | [2515685 chr15 | 15 | 49072248  | 49079325  | 7078   | 11  | -0.303344 | 0.053092 | 49072014  | 49072483  | 49079097  | 49079551  |
| 542 NA19132 | [2515685 chr15 | 15 | 66450268  | 66451800  | 1533   | 2   | -0.827907 | 0.124394 | 66449997  | 66450539  | 66451265  | 66452331  |
| 543 NA19132 | [2515685 chr15 | 15 | 70728807  | 70749323  | 20517  | 34  | -0.252502 | 0.03017  | 70728427  | 70729187  | 70749230  | 70749411  |
| 544 NA19132 | [2515685 chr15 | 15 | 74671388  | 74682821  | 11434  | 9   | 0.890514  | 0.060991 | 74671122  | 74671654  | 74680518  | 74689511  |
| 545 NA19132 | [2515685 chr15 | 15 | 75117585  | 75119946  | 2362   | 4   | 0.870856  | 0.089562 | 75117343  | 75117827  | 75119741  | 75120151  |
| 546 NA19132 | [2515685 chr15 | 15 | 80588100  | 80588985  | 886    | 2   | -0.939717 | 0.124395 | 80587699  | 80588502  | 80588602  | 80589361  |
| 547 NA19132 | [2515685 chr15 | 15 | 81276907  | 81293550  | 16644  | 15  | -0.258772 | 0.046401 | 81276538  | 81277276  | 81293219  | 81293881  |
| 548 NA19132 | [2515685 chr15 | 15 | 82869848  | 82876848  | 7001   | 3   | -0.636214 | 0.101568 | 82860467  | 82872151  | 82875844  | 82877851  |
| 549 NA19132 | [2515685 chr15 | 15 | 83685983  | 83688723  | 2741   | 2   | -0.649641 | 0.124395 | 83684729  | 83687238  | 83687705  | 83689741  |
| 550 NA19132 | [2515685 chr15 | 15 | 88591494  | 88593273  | 1780   | 2   | -0.731883 | 0.125    | 88591119  | 88591870  | 88593023  | 88593521  |
| 551 NA19132 | [2515685 chr15 | 15 | 89720231  | 89722557  | 2327   | 3   | -0.63379  | 0.101567 | 89719629  | 89720833  | 89722215  | 89722901  |
| 552 NA19132 | [2515685 chr15 | 15 | 98234084  | 98240716  | 6633   | 8   | 0.722834  | 0.066438 | 98233842  | 98234327  | 98239350  | 98242081  |
| 553 NA19132 | [2515685 chr15 | 15 | 99453510  | 99455547  | 2038   | 3   | 1.033819  | 0.101567 | 99453160  | 99453860  | 99454156  | 99456931  |
| 554 NA19132 | [2515685 chr15 | 15 | 100109640 | 100122682 | 13043  | 98  | 0.8004    | 0.017771 | 100108905 | 100110376 | 100122315 | 100123051 |
| 555 NA19132 | [2515685 chr15 | 15 | 100201656 | 100206536 | 4881   | 7   | -0.336495 | 0.066492 | 100201433 | 100201879 | 100206265 | 100206801 |
| 556 NA19132 | [2515685 chr15 | 15 | 100264033 | 100328077 | 64045  | 49  | 0.349757  | 0.025132 | 100263857 | 100264210 | 100327274 | 100328881 |
| 557 NA19132 | [2515685 chr16 | 16 | 417757    | 419495    | 1739   | 2   | -1.039342 | 0.124394 | 417264    | 418269    | 419007    | 419984    |
| 558 NA19132 | [2515685 chr16 | 16 | 946002    | 952527    | 6526   | 41  | 0.361882  | 0.027474 | 945660    | 946345    | 952191    | 952864    |
| 559 NA19132 | [2515685 chr16 | 16 | 14695589  | 14707381  | 11793  | 9   | 0.596386  | 0.05864  | 14695341  | 14695838  | 14706351  | 14708411  |

|             |                |    |          |          |        |     |           |          |          |          |          |          |
|-------------|----------------|----|----------|----------|--------|-----|-----------|----------|----------|----------|----------|----------|
| 560 NA19132 | [2515685 chr16 | 16 | 14734707 | 14746503 | 11797  | 9   | 0.596386  | 0.05864  | 14734459 | 14734956 | 14745473 | 1474753: |
| 561 NA19132 | [2515685 chr16 | 16 | 16633469 | 16639120 | 5652   | 4   | 0.726105  | 0.08796  | 16632502 | 16634437 | 16638386 | 1663985- |
| 562 NA19132 | [2515685 chr16 | 16 | 20419891 | 20441474 | 21584  | 24  | -0.673443 | 0.036238 | 20419728 | 20420055 | 20441310 | 2044163: |
| 563 NA19132 | [2515685 chr16 | 16 | 21476301 | 21502620 | 26320  | 18  | 0.36185   | 0.041465 | 21475893 | 21476709 | 21501101 | 2150414: |
| 564 NA19132 | [2515685 chr16 | 16 | 28017904 | 28018943 | 1040   | 2   | 0.755381  | 0.124395 | 28017595 | 28018213 | 28018681 | 2801920: |
| 565 NA19132 | [2515685 chr16 | 16 | 32073117 | 32075147 | 2031   | 5   | 0.525151  | 0.078674 | 32072967 | 32073268 | 32074517 | 3207577: |
| 566 NA19132 | [2515685 chr16 | 16 | 32159898 | 32160377 | 480    | 2   | -1.607926 | 0.127596 | 32159453 | 32160343 | 32160346 | 3216040: |
| 567 NA19132 | [2515685 chr16 | 16 | 32606692 | 32607163 | 472    | 2   | -1.607953 | 0.127597 | 32606661 | 32606724 | 32606727 | 3260759: |
| 568 NA19132 | [2515685 chr16 | 16 | 32690003 | 32691563 | 1561   | 4   | 0.535881  | 0.08796  | 32689373 | 32690634 | 32691272 | 3269185: |
| 569 NA19132 | [2515685 chr16 | 16 | 33016481 | 33018043 | 1563   | 4   | 0.535881  | 0.08796  | 33016187 | 33016775 | 33017413 | 3301867- |
| 570 NA19132 | [2515685 chr16 | 16 | 33100875 | 33101346 | 472    | 2   | -1.607927 | 0.127596 | 33100438 | 33101312 | 33101315 | 3310137: |
| 571 NA19132 | [2515685 chr16 | 16 | 33157406 | 33157879 | 474    | 2   | -1.607927 | 0.127596 | 33156967 | 33157845 | 33157848 | 3315791: |
| 572 NA19132 | [2515685 chr16 | 16 | 34321826 | 34342005 | 20180  | 31  | -0.46707  | 0.009884 | 34317185 | 34323706 | 34341760 | 3434225: |
| 573 NA19132 | [2515685 chr16 | 16 | 34343871 | 34609073 | 265203 | 287 | -0.46707  | 0.009884 | 34343515 | 34344228 | 34607193 | 3461732: |
| 574 NA19132 | [2515685 chr16 | 16 | 57204541 | 57207585 | 3045   | 3   | 4.517394  | 0.182432 | 57204170 | 57204913 | 57206938 | 5720823: |
| 575 NA19132 | [2515685 chr16 | 16 | 68534746 | 68542873 | 8128   | 9   | -0.376188 | 0.05864  | 68534434 | 68535058 | 68542452 | 6854329: |
| 576 NA19132 | [2515685 chr16 | 16 | 68702274 | 68764096 | 61823  | 69  | -0.56455  | 0.021183 | 68701593 | 68702955 | 68763695 | 6876449: |
| 577 NA19132 | [2515685 chr16 | 16 | 68782742 | 68788138 | 5397   | 11  | -0.268838 | 0.053042 | 68782176 | 68783309 | 68788131 | 6878814: |
| 578 NA19132 | [2515685 chr16 | 16 | 72923059 | 72965445 | 42387  | 39  | -0.514683 | 0.028172 | 72922372 | 72923746 | 72964811 | 7296607: |
| 579 NA19132 | [2515685 chr16 | 16 | 73014274 | 73019747 | 5474   | 5   | -0.465115 | 0.078674 | 73013873 | 73014676 | 73019521 | 7301997: |
| 580 NA19132 | [2515685 chr16 | 16 | 76928915 | 76942282 | 13368  | 11  | 0.657225  | 0.053894 | 76928609 | 76929221 | 76941602 | 7694296: |
| 581 NA19132 | [2515685 chr16 | 16 | 84562720 | 84565235 | 2516   | 11  | 0.753661  | 0.053042 | 84561685 | 84563756 | 84565142 | 8456532: |
| 582 NA19132 | [2515685 chr16 | 16 | 86992221 | 86995502 | 3282   | 3   | 0.521925  | 0.101568 | 86991678 | 86992764 | 86994767 | 8699623: |
| 583 NA19132 | [2515685 chr16 | 16 | 88173073 | 88174748 | 1676   | 3   | 0.600685  | 0.101567 | 88172794 | 88173352 | 88174105 | 8817539: |
| 584 NA19132 | [2515685 chr16 | 16 | 88690375 | 88719370 | 28996  | 51  | 0.260682  | 0.024634 | 88690870 | 88690880 | 88719132 | 8871960: |
| 585 NA19132 | [2515685 chr17 | 17 | 911980   | 915554   | 3575   | 4   | -1.229882 | 0.08796  | 911452   | 912508   | 915413   | 915696   |
| 586 NA19132 | [2515685 chr17 | 17 | 966845   | 969578   | 2734   | 21  | 0.505616  | 0.038389 | 966537   | 967154   | 969378   | 969775   |
| 587 NA19132 | [2515685 chr17 | 17 | 13563144 | 13564867 | 1724   | 2   | -0.655853 | 0.124394 | 13562902 | 13563387 | 13564348 | 1356538: |
| 588 NA19132 | [2515685 chr17 | 17 | 16605718 | 16607150 | 1433   | 2   | -0.70701  | 0.125363 | 16605420 | 16606016 | 16606963 | 1660733: |
| 589 NA19132 | [2515685 chr17 | 17 | 16662933 | 16665630 | 2698   | 5   | -0.558846 | 0.078674 | 16662626 | 16663241 | 16665353 | 1666590: |
| 590 NA19132 | [2515685 chr17 | 17 | 18234535 | 18236436 | 1902   | 3   | 0.583086  | 0.101567 | 18234217 | 18234853 | 18236134 | 1823673: |
| 591 NA19132 | [2515685 chr17 | 17 | 18259328 | 18263581 | 4254   | 6   | 0.38228   | 0.073035 | 18258890 | 18259767 | 18262481 | 1826468: |
| 592 NA19132 | [2515685 chr17 | 17 | 18296513 | 18345127 | 48615  | 79  | 0.356476  | 0.019797 | 18296246 | 18296781 | 18345008 | 1834524: |
| 593 NA19132 | [2515685 chr17 | 17 | 18944963 | 18945507 | 545    | 2   | -0.657054 | 0.124395 | 18944775 | 18945151 | 18945244 | 1894577: |
| 594 NA19132 | [2515685 chr17 | 17 | 18994651 | 18995259 | 609    | 2   | -0.657055 | 0.124395 | 18994388 | 18994915 | 18995008 | 1899551: |
| 595 NA19132 | [2515685 chr17 | 17 | 19070936 | 19071543 | 608    | 2   | -0.657058 | 0.124395 | 19070686 | 19071187 | 19071280 | 1907180: |
| 596 NA19132 | [2515685 chr17 | 17 | 20299935 | 20300531 | 597    | 2   | -1.001751 | 0.125624 | 20299568 | 20300303 | 20300311 | 2030075: |
| 597 NA19132 | [2515685 chr17 | 17 | 20315254 | 20335856 | 20603  | 29  | 0.48743   | 0.032668 | 20314152 | 20316357 | 20335559 | 2033615: |
| 598 NA19132 | [2515685 chr17 | 17 | 20387412 | 20398474 | 11063  | 21  | 0.258657  | 0.038389 | 20386881 | 20387944 | 20398180 | 2039876: |
| 599 NA19132 | [2515685 chr17 | 17 | 22369064 | 22375569 | 6506   | 9   | -0.298536 | 0.05864  | 22368576 | 22369552 | 22375482 | 2237565: |
| 600 NA19132 | [2515685 chr17 | 17 | 31430406 | 31889223 | 458818 | 641 | 0.403201  | 0.004037 | 31429658 | 31431155 | 31888786 | 3188966: |
| 601 NA19132 | [2515685 chr17 | 17 | 33324385 | 33402329 | 77945  | 148 | 0.403201  | 0.004037 | 33323841 | 33324930 | 33401902 | 3340275: |
| 602 NA19132 | [2515685 chr17 | 17 | 33408561 | 33639547 | 230987 | 260 | 0.403201  | 0.004037 | 33408077 | 33409045 | 33638405 | 3364068: |
| 603 NA19132 | [2515685 chr17 | 17 | 36675530 | 36685343 | 9814   | 10  | -0.73495  | 0.057019 | 36675011 | 36676049 | 36684647 | 3668604: |
| 604 NA19132 | [2515685 chr17 | 17 | 41779931 | 41917247 | 137317 | 131 | 0.307466  | 0.01537  | 41779457 | 41780406 | 41916853 | 4191764: |
| 605 NA19132 | [2515685 chr17 | 17 | 41997426 | 42134816 | 137391 | 124 | 0.310034  | 0.0158   | 41996952 | 41997901 | 42134422 | 4213521: |
| 606 NA19132 | [2515685 chr17 | 17 | 42988804 | 43026670 | 37867  | 54  | 1.085772  | 0.024163 | 42988208 | 42989400 | 43025568 | 4302777: |
| 607 NA19132 | [2515685 chr17 | 17 | 55436772 | 55459798 | 23027  | 40  | 0.550448  | 0.027827 | 55436212 | 55437333 | 55459168 | 5546042: |
| 608 NA19132 | [2515685 chr17 | 17 | 55529573 | 55543551 | 13979  | 2   | 1.174472  | 0.124395 | 55527911 | 55531236 | 55542674 | 5554442: |
| 609 NA19132 | [2515685 chr17 | 17 | 55550803 | 55552834 | 2032   | 2   | 0.875549  | 0.12484  | 55549945 | 55551662 | 55552508 | 5555316: |
| 610 NA19132 | [2515685 chr17 | 17 | 57652724 | 57666921 | 14198  | 16  | 0.280216  | 0.04398  | 57652052 | 57653396 | 57666649 | 5766719: |
| 611 NA19132 | [2515685 chr17 | 17 | 57684203 | 57709501 | 25299  | 56  | 0.703082  | 0.023508 | 57683826 | 57684581 | 57709158 | 5770984: |
| 612 NA19132 | [2515685 chr18 | 18 | 6833716  | 6836297  | 2582   | 3   | -0.536366 | 0.101567 | 6833479  | 6833953  | 6836008  | 683658:  |
| 613 NA19132 | [2515685 chr18 | 18 | 14246928 | 14322605 | 75678  | 22  | 0.377887  | 0.037506 | 14244529 | 14249327 | 14320558 | 1432465: |
| 614 NA19132 | [2515685 chr18 | 18 | 14451142 | 14547645 | 96504  | 131 | -0.25484  | 0.015399 | 14450809 | 14451475 | 14547186 | 1454810: |

|             |                |    |          |          |        |     |           |          |          |          |          |          |
|-------------|----------------|----|----------|----------|--------|-----|-----------|----------|----------|----------|----------|----------|
| 615 NA19132 | [2515685 chr18 | 18 | 24076374 | 24179409 | 103036 | 2   | -0.645228 | 0.124395 | 24003903 | 24080953 | 24174830 | 2428681- |
| 616 NA19132 | [2515685 chr18 | 18 | 28142218 | 28143399 | 1182   | 2   | 0.851209  | 0.134637 | 28141854 | 28142583 | 28143055 | 2814374- |
| 617 NA19132 | [2515685 chr18 | 18 | 35757666 | 35765297 | 7632   | 4   | -0.454679 | 0.08796  | 35757036 | 35758297 | 35764954 | 3576564- |
| 618 NA19132 | [2515685 chr18 | 18 | 36514289 | 36521090 | 6802   | 6   | -0.83265  | 0.072158 | 36513759 | 36514820 | 36520512 | 3652166- |
| 619 NA19132 | [2515685 chr18 | 18 | 42791944 | 42808854 | 16911  | 20  | 0.466282  | 0.039414 | 42749992 | 42796523 | 42808379 | 4280933- |
| 620 NA19132 | [2515685 chr18 | 18 | 61352308 | 61358519 | 6212   | 6   | -0.834698 | 0.074962 | 61351802 | 61352814 | 61357912 | 6135912- |
| 621 NA19132 | [2515685 chr18 | 18 | 61917747 | 61920171 | 2425   | 4   | 2.40266   | 0.126697 | 61917522 | 61917973 | 61919646 | 6192069- |
| 622 NA19132 | [2515685 chr18 | 18 | 74231104 | 74234275 | 3172   | 30  | 0.655021  | 0.032118 | 74230952 | 74231256 | 74234139 | 7423441- |
| 623 NA19132 | [2515685 chr18 | 18 | 74297715 | 74299391 | 1677   | 5   | -0.412224 | 0.078674 | 74297243 | 74298187 | 74299167 | 7429961- |
| 624 NA19132 | [2515685 chr18 | 18 | 74392800 | 74398225 | 5426   | 4   | 0.709745  | 0.091447 | 74390826 | 74394774 | 74397790 | 7439866- |
| 625 NA19132 | [2515685 chr19 | 19 | 14054    | 79514    | 65461  | 63  | 0.368642  | 0.022172 | 13672    | 14437    | 79338    | 7969C    |
| 626 NA19132 | [2515685 chr19 | 19 | 219435   | 226642   | 7208   | 11  | 0.390523  | 0.053042 | 217988   | 220882   | 226332   | 22695-   |
| 627 NA19132 | [2515685 chr19 | 19 | 310414   | 312953   | 2540   | 14  | -1.360774 | 0.047368 | 309687   | 311142   | 312913   | 31299-   |
| 628 NA19132 | [2515685 chr19 | 19 | 8179596  | 8181043  | 1448   | 2   | 0.658368  | 0.127714 | 8179323  | 8179869  | 8180879  | 818120-  |
| 629 NA19132 | [2515685 chr19 | 19 | 8707491  | 8764835  | 57345  | 96  | 0.36924   | 0.017955 | 8706686  | 8708296  | 8763911  | 876575-  |
| 630 NA19132 | [2515685 chr19 | 19 | 20173413 | 20180671 | 7259   | 12  | -0.308356 | 0.050784 | 20173172 | 20173654 | 20180578 | 2018076- |
| 631 NA19132 | [2515685 chr19 | 19 | 20366134 | 20368530 | 2397   | 7   | -0.375477 | 0.066492 | 20365974 | 20366294 | 20368302 | 2036875- |
| 632 NA19132 | [2515685 chr19 | 19 | 22640089 | 22645259 | 5171   | 13  | -0.342882 | 0.048855 | 22639995 | 22640184 | 22644212 | 2264630- |
| 633 NA19132 | [2515685 chr19 | 19 | 22661698 | 22664892 | 3195   | 8   | -0.382423 | 0.063581 | 22661443 | 22661954 | 22664804 | 2266498- |
| 634 NA19132 | [2515685 chr19 | 19 | 22931048 | 22934759 | 3712   | 3   | 1.170276  | 0.121886 | 22918199 | 22933577 | 22934546 | 2293497- |
| 635 NA19132 | [2515685 chr19 | 19 | 23007902 | 23014812 | 6911   | 7   | 0.622903  | 0.068428 | 22990964 | 23010431 | 23014157 | 2301546- |
| 636 NA19132 | [2515685 chr19 | 19 | 23347334 | 23349374 | 2041   | 5   | -0.393373 | 0.078674 | 23346712 | 23347957 | 23349259 | 2334949- |
| 637 NA19132 | [2515685 chr19 | 19 | 23701395 | 23702774 | 1380   | 2   | -0.858832 | 0.16677  | 23700861 | 23701929 | 23702467 | 2370308- |
| 638 NA19132 | [2515685 chr19 | 19 | 24146650 | 24146898 | 249    | 3   | -0.54634  | 0.101568 | 24146639 | 24146662 | 24146708 | 2414708- |
| 639 NA19132 | [2515685 chr19 | 19 | 24147818 | 24148730 | 913    | 4   | -0.851099 | 0.091065 | 24147801 | 24147835 | 24148193 | 2414926- |
| 640 NA19132 | [2515685 chr19 | 19 | 24150474 | 24151368 | 895    | 3   | -0.69865  | 0.138232 | 24150419 | 24150529 | 24150594 | 2415214- |
| 641 NA19132 | [2515685 chr19 | 19 | 39419837 | 39421349 | 1513   | 3   | 0.76327   | 0.101567 | 39419616 | 39420059 | 39421018 | 3942168- |
| 642 NA19132 | [2515685 chr19 | 19 | 56827216 | 56836311 | 9096   | 7   | -0.860278 | 0.066664 | 56826331 | 56828101 | 56834905 | 5683771- |
| 643 NA19132 | [2515685 chr19 | 19 | 56879763 | 56896908 | 17146  | 21  | 0.275354  | 0.038389 | 56879350 | 56880176 | 56896533 | 5689728- |
| 644 NA19132 | [2515685 chr19 | 19 | 58210435 | 58244458 | 34024  | 26  | -0.780244 | 0.034626 | 58209863 | 58211007 | 58243893 | 5824502- |
| 645 NA19132 | [2515685 chr19 | 19 | 58600367 | 58602540 | 2174   | 3   | -0.582992 | 0.10832  | 58599853 | 58600882 | 58602248 | 5860283- |
| 646 NA19132 | [2515685 chr19 | 19 | 59419268 | 59436244 | 16977  | 22  | 0.721861  | 0.037598 | 59418762 | 59419774 | 59435978 | 5943651- |
| 647 NA19132 | [2515685 chr19 | 19 | 59492384 | 59498950 | 6567   | 7   | 0.420671  | 0.066492 | 59491977 | 59492791 | 59497077 | 5950082- |
| 648 NA19132 | [2515685 chr19 | 19 | 60958920 | 60976029 | 17110  | 15  | -0.774812 | 0.045916 | 60957933 | 60959907 | 60975748 | 6097631- |
| 649 NA19132 | [2515685 chr20 | 20 | 1618545  | 1622401  | 3857   | 2   | -1.01702  | 0.125743 | 1618232  | 1618858  | 1622081  | 162272-  |
| 650 NA19132 | [2515685 chr20 | 20 | 12259914 | 12261647 | 1734   | 2   | -0.699827 | 0.128354 | 12259622 | 12260207 | 12261252 | 1226204- |
| 651 NA19132 | [2515685 chr20 | 20 | 14760272 | 14762606 | 2335   | 2   | -0.71032  | 0.124394 | 14759977 | 14760568 | 14762119 | 1476309- |
| 652 NA19132 | [2515685 chr20 | 20 | 25730081 | 25735503 | 5423   | 5   | -0.399489 | 0.078674 | 25730023 | 25730139 | 25735035 | 2573597- |
| 653 NA19132 | [2515685 chr20 | 20 | 25977672 | 25983093 | 5422   | 5   | -0.39949  | 0.078674 | 25977204 | 25978140 | 25983035 | 2598315- |
| 654 NA19132 | [2515685 chr20 | 20 | 59951513 | 59957050 | 5538   | 18  | 1.100888  | 0.041658 | 59950681 | 59952345 | 59956538 | 5995756- |
| 655 NA19132 | [2515685 chr20 | 20 | 60843403 | 60845259 | 1857   | 3   | -1.542247 | 0.122637 | 60842942 | 60843864 | 60845073 | 6084544- |
| 656 NA19132 | [2515685 chr20 | 20 | 61708834 | 61711805 | 2972   | 22  | 0.328922  | 0.037506 | 61708573 | 61709096 | 61711616 | 6171199- |
| 657 NA19132 | [2515685 chr20 | 20 | 62066380 | 62068214 | 1835   | 8   | 0.576901  | 0.062197 | 62066146 | 62066615 | 62067671 | 6206875- |
| 658 NA19132 | [2515685 chr21 | 21 | 13905235 | 14010277 | 105043 | 148 | -0.270595 | 0.014524 | 13904937 | 13905534 | 14010094 | 1401046- |
| 659 NA19132 | [2515685 chr21 | 21 | 14150623 | 14197493 | 46871  | 16  | 0.323789  | 0.04398  | 14145265 | 14155981 | 14194870 | 1420011- |
| 660 NA19132 | [2515685 chr22 | 22 | 14474806 | 14536261 | 61456  | 113 | -0.484046 | 0.006831 | 14474622 | 14474991 | 14536238 | 1453628- |
| 661 NA19132 | [2515685 chr22 | 22 | 14538851 | 14830910 | 292060 | 544 | -0.484046 | 0.006831 | 14538699 | 14539004 | 14830451 | 1483136- |
| 662 NA19132 | [2515685 chr22 | 22 | 17033411 | 17208002 | 174592 | 268 | 0.430776  | 0.009363 | 17032801 | 17034021 | 17207501 | 1720850- |
| 663 NA19132 | [2515685 chr22 | 22 | 17214674 | 17249803 | 35130  | 75  | 0.430776  | 0.009363 | 17213546 | 17215803 | 17249433 | 1725017- |
| 664 NA19132 | [2515685 chr22 | 22 | 17396961 | 17397941 | 981    | 2   | 0.751949  | 0.124395 | 17396599 | 17397323 | 17397517 | 1739836- |
| 665 NA19132 | [2515685 chr22 | 22 | 18273943 | 18276450 | 2508   | 2   | -0.733086 | 0.124394 | 18273512 | 18274375 | 18274942 | 1827795- |
| 666 NA19132 | [2515685 chr22 | 22 | 18698883 | 18734175 | 35293  | 46  | 0.462371  | 0.025938 | 18696181 | 18701563 | 18733858 | 1873449- |
| 667 NA19132 | [2515685 chr22 | 22 | 18947502 | 19041529 | 94028  | 109 | 0.417698  | 0.016908 | 18947184 | 18947821 | 19040980 | 1904215- |
| 668 NA19132 | [2515685 chr22 | 22 | 19392079 | 19571206 | 179128 | 10  | -0.314143 | 0.055631 | 19391751 | 19392407 | 19568526 | 1966688- |
| 669 NA19132 | [2515685 chr22 | 22 | 19791149 | 19793944 | 2796   | 7   | 0.73462   | 0.066492 | 19791060 | 19791239 | 19793875 | 1979401- |



|     |         |                |    |           |           |        |     |           |          |           |           |           |          |
|-----|---------|----------------|----|-----------|-----------|--------|-----|-----------|----------|-----------|-----------|-----------|----------|
| 670 | NA19132 | [2515685 chr22 | 22 | 19809907  | 19959204  | 149298 | 228 | 0.448639  | 0.010024 | 19809849  | 19809966  | 19958770  | 19959631 |
| 671 | NA19132 | [2515685 chr22 | 22 | 19966521  | 20003066  | 36546  | 71  | 0.448639  | 0.010024 | 19966267  | 19966775  | 20002927  | 20003201 |
| 672 | NA19132 | [2515685 chr22 | 22 | 20178392  | 20180295  | 1904   | 4   | -0.530505 | 0.08796  | 20178100  | 20178684  | 20180219  | 2018037  |
| 673 | NA19132 | [2515685 chr22 | 22 | 21979092  | 22139776  | 160685 | 13  | 0.350225  | 0.048792 | 21977673  | 21980511  | 22139670  | 22139887 |
| 674 | NA19132 | [2515685 chr22 | 22 | 22672624  | 22720154  | 47531  | 49  | 0.882311  | 0.027705 | 22672391  | 22672858  | 22719882  | 22720421 |
| 675 | NA19132 | [2515685 chr22 | 22 | 22977797  | 22984667  | 6871   | 12  | 0.335908  | 0.050784 | 22977114  | 22978480  | 22984294  | 2298504  |
| 676 | NA19132 | [2515685 chr22 | 22 | 22985370  | 22986040  | 671    | 3   | 0.830597  | 0.101568 | 22985041  | 22985699  | 22985733  | 2298634  |
| 677 | NA19132 | [2515685 chr22 | 22 | 22995064  | 22998522  | 3459   | 9   | 0.377494  | 0.05864  | 22994927  | 22995201  | 22997635  | 22999401 |
| 678 | NA19132 | [2515685 chr22 | 22 | 23183498  | 23377449  | 193952 | 37  | 0.267592  | 0.028921 | 23136147  | 23186178  | 23377256  | 2337764  |
| 679 | NA19132 | [2515685 chr22 | 22 | 23998317  | 24000421  | 2105   | 2   | 0.651239  | 0.124395 | 23997167  | 23999467  | 24000076  | 2400076  |
| 680 | NA19132 | [2515685 chr22 | 22 | 33619409  | 33623490  | 4082   | 5   | 0.795316  | 0.078674 | 33618939  | 33619879  | 33622642  | 33624331 |
| 681 | NA19132 | [2515685 chr22 | 22 | 35296805  | 35301341  | 4537   | 4   | 0.441949  | 0.08796  | 35296402  | 35297208  | 35300931  | 3530175  |
| 682 | NA19132 | [2515685 chr22 | 22 | 41214550  | 41278526  | 63977  | 53  | 0.298571  | 0.024164 | 41213953  | 41215148  | 41278339  | 4127871  |
| 683 | NA19132 | [2515685 chr22 | 22 | 43455661  | 43456925  | 1265   | 2   | -0.6989   | 0.124394 | 43455369  | 43455954  | 43456505  | 43457341 |
| 684 | NA19132 | [2515685 chr22 | 22 | 43790663  | 43878995  | 88333  | 3   | -0.715717 | 0.101567 | 43700090  | 43793343  | 43876436  | 43881551 |
| 1   | NA12802 | [2515685 chr1  | 1  | 11868     | 77845     | 65978  | 97  | 0.500042  | 0.014937 | 11692     | 12045     | 77684     | 78006    |
| 2   | NA12802 | [2515685 chr1  | 1  | 445269    | 624922    | 179654 | 133 | -0.332824 | 0.01289  | 444422    | 446116    | 624079    | 625766   |
| 3   | NA12802 | [2515685 chr1  | 1  | 5304270   | 5305267   | 998    | 20  | 0.288368  | 0.030581 | 5303963   | 5304578   | 5305148   | 5305381  |
| 4   | NA12802 | [2515685 chr1  | 1  | 10416438  | 10418311  | 1874   | 2   | -0.762065 | 0.112883 | 10415863  | 10417014  | 10417712  | 1041891  |
| 5   | NA12802 | [2515685 chr1  | 1  | 12884329  | 12886858  | 2530   | 4   | 0.432045  | 0.062048 | 12884224  | 12884434  | 12886536  | 12887181 |
| 6   | NA12802 | [2515685 chr1  | 1  | 12914903  | 12918712  | 3810   | 5   | 0.404357  | 0.069254 | 12914677  | 12915129  | 12918545  | 12918871 |
| 7   | NA12802 | [2515685 chr1  | 1  | 12967932  | 12995178  | 27247  | 34  | -0.325045 | 0.014316 | 12967517  | 12968347  | 12994551  | 12995801 |
| 8   | NA12802 | [2515685 chr1  | 1  | 13001855  | 13096219  | 94365  | 53  | -0.325045 | 0.014316 | 13001230  | 13002480  | 13095739  | 13096701 |
| 9   | NA12802 | [2515685 chr1  | 1  | 13159940  | 13162706  | 2767   | 4   | 0.471007  | 0.058104 | 13159618  | 13160263  | 13162366  | 1316304  |
| 10  | NA12802 | [2515685 chr1  | 1  | 13260906  | 13262648  | 1743   | 3   | -0.378676 | 0.070545 | 13260620  | 13261192  | 13262403  | 1326289  |
| 11  | NA12802 | [2515685 chr1  | 1  | 13380737  | 13383503  | 2767   | 4   | 0.471007  | 0.058104 | 13380415  | 13381060  | 13383163  | 1338384  |
| 12  | NA12802 | [2515685 chr1  | 1  | 13450095  | 13457066  | 6972   | 3   | -0.491244 | 0.070469 | 13449190  | 13451001  | 13456679  | 1345745  |
| 13  | NA12802 | [2515685 chr1  | 1  | 13481746  | 13483483  | 1738   | 3   | -0.419566 | 0.069158 | 13481460  | 13482033  | 13483231  | 13483731 |
| 14  | NA12802 | [2515685 chr1  | 1  | 16546501  | 16573201  | 26701  | 26  | -0.321009 | 0.027211 | 16545973  | 16547030  | 16572675  | 1657372  |
| 15  | NA12802 | [2515685 chr1  | 1  | 16685492  | 16693017  | 7526   | 10  | -0.359014 | 0.045942 | 16685158  | 16685827  | 16692589  | 16693441 |
| 16  | NA12802 | [2515685 chr1  | 1  | 16754301  | 16798847  | 44547  | 53  | -0.516519 | 0.019749 | 16754089  | 16754514  | 16798504  | 1679919  |
| 17  | NA12802 | [2515685 chr1  | 1  | 16951179  | 16967620  | 16442  | 12  | -0.397779 | 0.041133 | 16950818  | 16951540  | 16967220  | 1696802  |
| 18  | NA12802 | [2515685 chr1  | 1  | 16975906  | 17008908  | 33003  | 35  | -0.576122 | 0.026377 | 16975406  | 16976406  | 17008393  | 1700942  |
| 19  | NA12802 | [2515685 chr1  | 1  | 17010797  | 17026185  | 15389  | 15  | -0.315745 | 0.03555  | 17010506  | 17011088  | 17025840  | 17026531 |
| 20  | NA12802 | [2515685 chr1  | 1  | 72467674  | 72476358  | 8685   | 5   | -0.922974 | 0.077299 | 72467220  | 72468129  | 72475692  | 72477021 |
| 21  | NA12802 | [2515685 chr1  | 1  | 101720095 | 101726932 | 6838   | 7   | -0.725795 | 0.061839 | 101719625 | 101720565 | 101726599 | 10172726 |
| 22  | NA12802 | [2515685 chr1  | 1  | 103865050 | 103873304 | 8255   | 12  | -0.463292 | 0.044911 | 103864928 | 103865173 | 103873021 | 10387358 |
| 23  | NA12802 | [2515685 chr1  | 1  | 108444641 | 108449550 | 4910   | 9   | 0.645677  | 0.051646 | 108443817 | 108445466 | 108449224 | 10844987 |
| 24  | NA12802 | [2515685 chr1  | 1  | 108514938 | 108565175 | 50238  | 58  | 0.324931  | 0.019955 | 108514864 | 108515012 | 108565023 | 10856532 |
| 25  | NA12802 | [2515685 chr1  | 1  | 108638096 | 108688767 | 50672  | 59  | 0.32833   | 0.019724 | 108637939 | 108638254 | 108688693 | 10868884 |
| 26  | NA12802 | [2515685 chr1  | 1  | 109933252 | 109935157 | 1906   | 3   | 0.445876  | 0.088121 | 109932716 | 109933789 | 109935040 | 10993527 |
| 27  | NA12802 | [2515685 chr1  | 1  | 109936541 | 109953240 | 16700  | 22  | 0.428576  | 0.0307   | 109935803 | 109937279 | 109952761 | 10995372 |
| 28  | NA12802 | [2515685 chr1  | 1  | 109961261 | 109965726 | 4466   | 3   | 0.503743  | 0.092954 | 109956492 | 109964530 | 109965065 | 10996638 |
| 29  | NA12802 | [2515685 chr1  | 1  | 111089464 | 111100714 | 11251  | 11  | -0.810821 | 0.048733 | 111088288 | 111090640 | 111100119 | 11110131 |
| 30  | NA12802 | [2515685 chr1  | 1  | 141971552 | 141976719 | 5168   | 17  | 0.269142  | 0.030326 | 141971472 | 141971633 | 141976542 | 14197689 |
| 31  | NA12802 | [2515685 chr1  | 1  | 142375186 | 142378533 | 3348   | 5   | -0.376284 | 0.063993 | 142374812 | 142375561 | 142377854 | 14237921 |
| 32  | NA12802 | [2515685 chr1  | 1  | 145100273 | 145105440 | 5168   | 16  | 0.287682  | 0.032258 | 145100193 | 145100354 | 145105263 | 14510561 |
| 33  | NA12802 | [2515685 chr1  | 1  | 145819213 | 145840436 | 21224  | 25  | 0.317172  | 0.02972  | 145819164 | 145819262 | 145840201 | 14584067 |
| 34  | NA12802 | [2515685 chr1  | 1  | 145929568 | 145951531 | 21964  | 26  | 0.381055  | 0.028528 | 145929405 | 145929732 | 145951467 | 14595159 |
| 35  | NA12802 | [2515685 chr1  | 1  | 146330898 | 146336084 | 5187   | 14  | 0.28522   | 0.033983 | 146330704 | 146331093 | 146336004 | 14633616 |
| 36  | NA12802 | [2515685 chr1  | 1  | 149368571 | 149385742 | 17172  | 3   | -0.534224 | 0.082311 | 149368105 | 149369038 | 149385339 | 14938614 |
| 37  | NA12802 | [2515685 chr1  | 1  | 149385742 | 149399435 | 13694  | 19  | -2.055143 | 0.054677 | 149385339 | 149386145 | 149399080 | 14939979 |
| 38  | NA12802 | [2515685 chr1  | 1  | 149573821 | 149583431 | 9611   | 5   | -3.232562 | 0.139673 | 149573460 | 149574182 | 149582912 | 14958395 |
| 39  | NA12802 | [2515685 chr1  | 1  | 193443495 | 193555075 | 111581 | 96  | 0.466614  | 0.015523 | 193443280 | 193443710 | 193548890 | 19355526 |
| 40  | NA12802 | [2515685 chr1  | 1  | 193629397 | 193650443 | 21047  | 17  | 0.306396  | 0.035322 | 193628979 | 193629815 | 193650245 | 19365064 |

|    |         |               |   |           |           |        |     |           |          |           |           |           |          |
|----|---------|---------------|---|-----------|-----------|--------|-----|-----------|----------|-----------|-----------|-----------|----------|
| 41 | NA12802 | [2515685 chr1 | 1 | 220392382 | 220401238 | 8857   | 3   | -0.593683 | 0.091512 | 220383037 | 220395651 | 220399276 | 22040320 |
| 42 | NA12802 | [2515685 chr1 | 1 | 220570241 | 220571400 | 1160   | 2   | 0.531149  | 0.101538 | 220569940 | 220570543 | 220571101 | 22057170 |
| 43 | NA12802 | [2515685 chr1 | 1 | 233202665 | 233204956 | 2292   | 42  | -0.636052 | 0.019624 | 233202312 | 233203018 | 233204364 | 23320554 |
| 44 | NA12802 | [2515685 chr1 | 1 | 239367166 | 239498531 | 131366 | 17  | -0.358116 | 0.036044 | 239366598 | 239367734 | 239496181 | 23950088 |
| 45 | NA12802 | [2515685 chr2 | 2 | 388500    | 390704    | 2205   | 6   | -0.490829 | 0.061472 | 387915    | 389086    | 390173    | 391236   |
| 46 | NA12802 | [2515685 chr2 | 2 | 409864    | 411383    | 1520   | 11  | 0.44157   | 0.041986 | 409612    | 410116    | 411034    | 411735   |
| 47 | NA12802 | [2515685 chr2 | 2 | 13507585  | 13511508  | 3924   | 8   | -0.475463 | 0.052953 | 13507388  | 13507783  | 13510995  | 1351202  |
| 48 | NA12802 | [2515685 chr2 | 2 | 34606446  | 34641571  | 35126  | 38  | 0.761198  | 0.026151 | 34601818  | 34609397  | 34641330  | 3464181  |
| 49 | NA12802 | [2515685 chr2 | 2 | 52661573  | 52696869  | 35297  | 26  | -0.805525 | 0.03056  | 52661218  | 52661928  | 52696416  | 5269732  |
| 50 | NA12802 | [2515685 chr2 | 2 | 56563626  | 56567381  | 3756   | 2   | 3.667174  | 0.211499 | 56556559  | 56566577  | 56567035  | 5656772  |
| 51 | NA12802 | [2515685 chr2 | 2 | 87473293  | 87478765  | 5473   | 9   | -0.420843 | 0.047642 | 87472060  | 87474526  | 87478435  | 8747909  |
| 52 | NA12802 | [2515685 chr2 | 2 | 87965257  | 88098957  | 133701 | 11  | 0.277512  | 0.043914 | 87964592  | 87965922  | 88097049  | 8810086  |
| 53 | NA12802 | [2515685 chr2 | 2 | 91613381  | 91623810  | 10430  | 19  | -0.353607 | 0.03186  | 91613205  | 91613558  | 91623669  | 9162395  |
| 54 | NA12802 | [2515685 chr2 | 2 | 97184386  | 97189733  | 5348   | 2   | -0.799714 | 0.101672 | 97182781  | 97185992  | 97186782  | 9719672  |
| 55 | NA12802 | [2515685 chr2 | 2 | 106338419 | 106344320 | 5902   | 7   | -0.571174 | 0.061632 | 106337769 | 106339069 | 106344055 | 10634458 |
| 56 | NA12802 | [2515685 chr2 | 2 | 114028006 | 114028857 | 852    | 7   | 0.295815  | 0.057082 | 114027870 | 114028143 | 114028311 | 11402940 |
| 57 | NA12802 | [2515685 chr2 | 2 | 114047737 | 114078067 | 30331  | 61  | 0.264857  | 0.018398 | 114046206 | 114049268 | 114053312 | 11408082 |
| 58 | NA12802 | [2515685 chr2 | 2 | 123193457 | 123199443 | 5987   | 5   | -0.661687 | 0.071128 | 123193121 | 123193793 | 123198757 | 12320012 |
| 59 | NA12802 | [2515685 chr2 | 2 | 126159437 | 126168349 | 8913   | 3   | -0.84948  | 0.087244 | 126158494 | 126160381 | 126168048 | 12616865 |
| 60 | NA12802 | [2515685 chr2 | 2 | 129354604 | 129360182 | 5579   | 4   | -0.899979 | 0.081457 | 129354317 | 129354892 | 129357659 | 12936270 |
| 61 | NA12802 | [2515685 chr2 | 2 | 153495552 | 153499409 | 3858   | 2   | 0.82502   | 0.118809 | 153484545 | 153498503 | 153498846 | 15349997 |
| 62 | NA12802 | [2515685 chr2 | 2 | 153622711 | 153625256 | 2546   | 3   | 0.981806  | 0.092177 | 153621175 | 153624247 | 153625088 | 15362542 |
| 63 | NA12802 | [2515685 chr2 | 2 | 180237123 | 180248038 | 10916  | 9   | -0.733364 | 0.04963  | 180235687 | 180238560 | 180247508 | 18024856 |
| 64 | NA12802 | [2515685 chr2 | 2 | 183438374 | 183461919 | 23546  | 24  | -0.677261 | 0.032133 | 183435274 | 183441325 | 183458968 | 18346525 |
| 65 | NA12802 | [2515685 chr2 | 2 | 208176479 | 208184457 | 7979   | 7   | 0.833937  | 0.057563 | 208176093 | 208176865 | 208183930 | 20818498 |
| 66 | NA12802 | [2515685 chr2 | 2 | 232512469 | 232537143 | 24675  | 6   | -0.591864 | 0.047436 | 232511142 | 232513796 | 232534243 | 23254004 |
| 67 | NA12802 | [2515685 chr2 | 2 | 242664580 | 242668683 | 4104   | 10  | 1.119599  | 0.039885 | 242664284 | 242664877 | 242668532 | 24266883 |
| 68 | NA12802 | [2515685 chr3 | 3 | 587432    | 638425    | 50994  | 44  | -0.306267 | 0.022131 | 586921    | 587943    | 638149    | 638701   |
| 69 | NA12802 | [2515685 chr3 | 3 | 1757211   | 1765702   | 8492   | 2   | 0.91904   | 0.122682 | 1756096   | 1758327   | 1762058   | 179730   |
| 70 | NA12802 | [2515685 chr3 | 3 | 37954149  | 37962148  | 8000   | 10  | -2.027609 | 0.070276 | 37953404  | 37954894  | 37961762  | 3796253  |
| 71 | NA12802 | [2515685 chr3 | 3 | 50888459  | 50888513  | 55     | 2   | 0.579855  | 0.110891 | 50888445  | 50888474  | 50888495  | 5088853  |
| 72 | NA12802 | [2515685 chr3 | 3 | 68821474  | 68830847  | 9374   | 17  | 0.780269  | 0.039107 | 68818894  | 68824055  | 68830417  | 6883127  |
| 73 | NA12802 | [2515685 chr3 | 3 | 76066312  | 76081451  | 15140  | 19  | -0.279085 | 0.032805 | 76065787  | 76066838  | 76081180  | 7608172  |
| 74 | NA12802 | [2515685 chr3 | 3 | 100426489 | 100432540 | 6052   | 6   | -0.883716 | 0.063872 | 100426149 | 100426829 | 100431494 | 10043358 |
| 75 | NA12802 | [2515685 chr3 | 3 | 105760262 | 105762355 | 2094   | 2   | -0.701771 | 0.114319 | 105759634 | 105760890 | 105761424 | 10576328 |
| 76 | NA12802 | [2515685 chr3 | 3 | 133191392 | 133196576 | 5185   | 5   | -0.697189 | 0.06865  | 133190820 | 133191965 | 133195824 | 13319732 |
| 77 | NA12802 | [2515685 chr3 | 3 | 163994592 | 164106273 | 111682 | 107 | 2.106793  | 0.025287 | 163993392 | 163995793 | 164106029 | 16410651 |
| 78 | NA12802 | [2515685 chr3 | 3 | 192547312 | 192554331 | 7020   | 10  | 0.932431  | 0.051235 | 192546950 | 192547674 | 192554127 | 19255453 |
| 79 | NA12802 | [2515685 chr3 | 3 | 194256506 | 194266625 | 10120  | 3   | -0.803023 | 0.092172 | 194242109 | 194260150 | 194265051 | 19426819 |
| 80 | NA12802 | [2515685 chr3 | 3 | 194357854 | 194368035 | 10182  | 12  | 2.478155  | 0.072857 | 194357665 | 194358044 | 194367817 | 19436825 |
| 81 | NA12802 | [2515685 chr3 | 3 | 196698886 | 196713768 | 14883  | 19  | -0.354271 | 0.02917  | 196698651 | 196699121 | 196711768 | 19671576 |
| 82 | NA12802 | [2515685 chr3 | 3 | 196943342 | 196965802 | 22461  | 19  | -0.619022 | 0.03444  | 196943147 | 196943538 | 196965494 | 19696611 |
| 83 | NA12802 | [2515685 chr3 | 3 | 196991681 | 197002965 | 11285  | 19  | 0.476403  | 0.034256 | 196991423 | 196991939 | 197002044 | 19700388 |
| 84 | NA12802 | [2515685 chr3 | 3 | 198422794 | 198427408 | 4615   | 2   | 0.881851  | 0.124413 | 198422381 | 198423207 | 198423959 | 19843085 |
| 85 | NA12802 | [2515685 chr3 | 3 | 198674426 | 198675470 | 1045   | 6   | 0.404642  | 0.05485  | 198674161 | 198674692 | 198674903 | 19867603 |
| 86 | NA12802 | [2515685 chr4 | 4 | 1594135   | 1595062   | 928    | 2   | 0.783887  | 0.113909 | 1593726   | 1594544   | 1594790   | 159533   |
| 87 | NA12802 | [2515685 chr4 | 4 | 8740931   | 8757471   | 16541  | 24  | 0.468008  | 0.023594 | 8740864   | 8740999   | 8757086   | 875785   |
| 88 | NA12802 | [2515685 chr4 | 4 | 9001573   | 9046719   | 45147  | 86  | 0.665041  | 0.012667 | 9001243   | 9001903   | 9046129   | 904730   |
| 89 | NA12802 | [2515685 chr4 | 4 | 9887220   | 9911397   | 24178  | 31  | 1.648594  | 0.04003  | 9886886   | 9887555   | 9910388   | 991240   |
| 90 | NA12802 | [2515685 chr4 | 4 | 40409876  | 40415029  | 5154   | 4   | -0.945737 | 0.081743 | 40409235  | 40410517  | 40413782  | 4041627  |
| 91 | NA12802 | [2515685 chr4 | 4 | 58136971  | 58137989  | 1019   | 2   | 0.592677  | 0.116466 | 58136758  | 58137185  | 58137589  | 5813839  |
| 92 | NA12802 | [2515685 chr4 | 4 | 64522941  | 64543857  | 20917  | 20  | -0.76363  | 0.03813  | 64522682  | 64523201  | 64542552  | 6454516  |
| 93 | NA12802 | [2515685 chr4 | 4 | 69202095  | 69365270  | 163176 | 116 | 0.912078  | 0.014702 | 69201955  | 69202236  | 69365129  | 6936541  |
| 94 | NA12802 | [2515685 chr4 | 4 | 69672033  | 69717280  | 45248  | 52  | 0.546711  | 0.018132 | 69671975  | 69672092  | 69717139  | 6971742  |
| 95 | NA12802 | [2515685 chr4 | 4 | 70206173  | 70418275  | 212103 | 218 | 0.288672  | 0.01032  | 70205193  | 70207154  | 70418083  | 7041846  |

|             |               |   |           |           |        |     |           |          |           |           |            |          |
|-------------|---------------|---|-----------|-----------|--------|-----|-----------|----------|-----------|-----------|------------|----------|
| 96 NA12802  | [2515685 chr4 | 4 | 115534210 | 115541546 | 7337   | 9   | -2.608778 | 0.096107 | 115530015 | 115537276 | 115539984  | 11554310 |
| 97 NA12802  | [2515685 chr4 | 4 | 124835704 | 124837199 | 1496   | 3   | -0.53413  | 0.093684 | 124835418 | 124835991 | 124836924  | 12483747 |
| 98 NA12802  | [2515685 chr4 | 4 | 133536192 | 133540723 | 4532   | 3   | -0.853281 | 0.102912 | 133531398 | 133539258 | 133540462  | 13354098 |
| 99 NA12802  | [2515685 chr4 | 4 | 138537751 | 138549906 | 12156  | 14  | 0.924295  | 0.047971 | 138537443 | 138538059 | 138547414  | 13855239 |
| 100 NA12802 | [2515685 chr4 | 4 | 142588136 | 142590500 | 2365   | 4   | -2.122294 | 0.112308 | 142587774 | 142588498 | 142590303  | 14259069 |
| 101 NA12802 | [2515685 chr4 | 4 | 153147415 | 153151949 | 4535   | 5   | -0.642845 | 0.06716  | 153146836 | 153147995 | 153151358  | 15315254 |
| 102 NA12802 | [2515685 chr4 | 4 | 162237272 | 162242562 | 5291   | 8   | -3.314565 | 0.113547 | 162236487 | 162238058 | 162242381  | 16224274 |
| 103 NA12802 | [2515685 chr4 | 4 | 162806038 | 162809269 | 3232   | 3   | 0.869693  | 0.08973  | 162804872 | 162807204 | 162808734  | 16280980 |
| 104 NA12802 | [2515685 chr4 | 4 | 169184442 | 169368370 | 183929 | 161 | 0.780541  | 0.012682 | 169184090 | 169184794 | 169366713  | 16937002 |
| 105 NA12802 | [2515685 chr4 | 4 | 172750241 | 172755216 | 4976   | 2   | -3.539063 | 0.30673  | 172748887 | 172751596 | 172753256  | 17275717 |
| 106 NA12802 | [2515685 chr4 | 4 | 173363594 | 173367718 | 4125   | 6   | -0.786446 | 0.064232 | 173362583 | 173364606 | 173367283  | 17336815 |
| 107 NA12802 | [2515685 chr4 | 4 | 173790048 | 173793313 | 3266   | 5   | -0.651485 | 0.07864  | 173789801 | 173790296 | 173793197  | 17379342 |
| 108 NA12802 | [2515685 chr4 | 4 | 173799832 | 173807321 | 7490   | 6   | -2.830741 | 0.131919 | 173799464 | 173800201 | 173804255  | 17381134 |
| 109 NA12802 | [2515685 chr4 | 4 | 183944886 | 183947025 | 2140   | 3   | -0.788787 | 0.083315 | 183944291 | 183945482 | 183946755  | 18394729 |
| 110 NA12802 | [2515685 chr4 | 4 | 185533276 | 185534552 | 1277   | 2   | 0.841198  | 0.129771 | 185532696 | 185533857 | 185534150  | 18553495 |
| 111 NA12802 | [2515685 chr4 | 4 | 185535274 | 185544849 | 9576   | 9   | 1.01663   | 0.054315 | 185534955 | 185535593 | 1855343276 | 18554642 |
| 112 NA12802 | [2515685 chr4 | 4 | 187728494 | 187732907 | 4414   | 15  | 1.69635   | 0.048076 | 187728193 | 187728795 | 187732541  | 18773327 |
| 113 NA12802 | [2515685 chr4 | 4 | 188255523 | 188269680 | 14158  | 235 | 0.677224  | 0.008529 | 188255215 | 188255831 | 188269403  | 18826995 |
| 114 NA12802 | [2515685 chr4 | 4 | 189801673 | 189807562 | 5890   | 8   | -0.33237  | 0.053468 | 189801381 | 189801966 | 189807064  | 18980806 |
| 115 NA12802 | [2515685 chr4 | 4 | 190528602 | 190533163 | 4562   | 21  | -0.627106 | 0.033058 | 190528058 | 190529146 | 190531664  | 19053466 |
| 116 NA12802 | [2515685 chr4 | 4 | 191142404 | 191143596 | 1193   | 3   | 0.384596  | 0.075815 | 191142135 | 191142673 | 191143215  | 19114397 |
| 117 NA12802 | [2515685 chr5 | 5 | 520743    | 521684    | 942    | 5   | 0.446397  | 0.071773 | 520428    | 521059    | 521427     | 521942   |
| 118 NA12802 | [2515685 chr5 | 5 | 743980    | 901723    | 157744 | 141 | 0.386248  | 0.011955 | 743336    | 744625    | 901319     | 902127   |
| 119 NA12802 | [2515685 chr5 | 5 | 1075284   | 1079920   | 4637   | 24  | 0.446675  | 0.029179 | 1074709   | 1075859   | 1079566    | 108027!  |
| 120 NA12802 | [2515685 chr5 | 5 | 1231558   | 1233247   | 1690   | 2   | -3.333724 | 0.18106  | 1231167   | 1231949   | 1232879    | 123361!  |
| 121 NA12802 | [2515685 chr5 | 5 | 8754941   | 8802041   | 47101  | 47  | -0.800119 | 0.023713 | 8753828   | 8756055   | 8801659    | 880242!  |
| 122 NA12802 | [2515685 chr5 | 5 | 12863961  | 12873512  | 9552   | 14  | -0.816168 | 0.046581 | 12863778  | 12864144  | 12873198   | 1287382! |
| 123 NA12802 | [2515685 chr5 | 5 | 21321400  | 21354390  | 32991  | 55  | -0.262152 | 0.017619 | 21321356  | 21321445  | 21354161   | 2135461! |
| 124 NA12802 | [2515685 chr5 | 5 | 21514574  | 21532674  | 18101  | 41  | -0.363389 | 0.020168 | 21513711  | 21515438  | 21532465   | 2153288! |
| 125 NA12802 | [2515685 chr5 | 5 | 21971730  | 22049242  | 77513  | 120 | -0.290154 | 0.012432 | 21971258  | 21972202  | 22048833   | 2204965! |
| 126 NA12802 | [2515685 chr5 | 5 | 26829433  | 26837938  | 8506   | 7   | 0.688656  | 0.066903 | 26829009  | 26829858  | 26837469   | 2683840! |
| 127 NA12802 | [2515685 chr5 | 5 | 34219149  | 34230043  | 10895  | 25  | -0.446316 | 0.028573 | 34218815  | 34219483  | 34229790   | 3423029! |
| 128 NA12802 | [2515685 chr5 | 5 | 68963353  | 68988617  | 25265  | 67  | -0.34991  | 0.015071 | 68963012  | 68963694  | 68987741   | 6898949! |
| 129 NA12802 | [2515685 chr5 | 5 | 69116586  | 69118622  | 2037   | 7   | -0.440163 | 0.043553 | 69116357  | 69116816  | 69118587   | 6911865! |
| 130 NA12802 | [2515685 chr5 | 5 | 69227725  | 69404835  | 177111 | 307 | -0.302958 | 0.004849 | 69226858  | 69228593  | 69404157   | 6940551! |
| 131 NA12802 | [2515685 chr5 | 5 | 69411352  | 69570626  | 159275 | 321 | -0.302958 | 0.004849 | 69410702  | 69412002  | 69570558   | 6957069! |
| 132 NA12802 | [2515685 chr5 | 5 | 69696397  | 69698436  | 2040   | 6   | -0.438988 | 0.04531  | 69696166  | 69696629  | 69698401   | 6969847! |
| 133 NA12802 | [2515685 chr5 | 5 | 69818862  | 69862668  | 43807  | 115 | -0.341262 | 0.011627 | 69818651  | 69819074  | 69862421   | 6986291! |
| 134 NA12802 | [2515685 chr5 | 5 | 69974791  | 69976828  | 2038   | 6   | -0.438988 | 0.04531  | 69974756  | 69974826  | 69976597   | 6997706! |
| 135 NA12802 | [2515685 chr5 | 5 | 70103607  | 70226843  | 123237 | 231 | -0.29463  | 0.007932 | 70102740  | 70104475  | 70226514   | 7022717! |
| 136 NA12802 | [2515685 chr5 | 5 | 70233016  | 70280260  | 47245  | 47  | -0.439622 | 0.017693 | 70232663  | 70233369  | 70279582   | 7028093! |
| 137 NA12802 | [2515685 chr5 | 5 | 70461691  | 70570968  | 109278 | 246 | -0.302923 | 0.007765 | 70461427  | 70461956  | 70570900   | 7057103! |
| 138 NA12802 | [2515685 chr5 | 5 | 71985085  | 71987802  | 2718   | 4   | -0.368557 | 0.072062 | 71984707  | 71985463  | 71987401   | 7198820! |
| 139 NA12802 | [2515685 chr5 | 5 | 81459213  | 81466055  | 6843   | 2   | -1.392641 | 0.125813 | 81455614  | 81462405  | 81462863   | 8147028! |
| 140 NA12802 | [2515685 chr5 | 5 | 98882118  | 98900556  | 18439  | 35  | -0.320263 | 0.023663 | 98881808  | 98882429  | 98900309   | 9890080! |
| 141 NA12802 | [2515685 chr5 | 5 | 99408801  | 99419037  | 10237  | 14  | -0.298768 | 0.022458 | 99408605  | 99408997  | 99418328   | 9941974! |
| 142 NA12802 | [2515685 chr5 | 5 | 99424905  | 99436061  | 11157  | 18  | -0.298768 | 0.022458 | 99424257  | 99425553  | 99433487   | 9943863! |
| 143 NA12802 | [2515685 chr5 | 5 | 99738581  | 99756720  | 18140  | 38  | -0.354517 | 0.022677 | 99738184  | 99738978  | 99756474   | 9975696! |
| 144 NA12802 | [2515685 chr5 | 5 | 122649189 | 122651412 | 2224   | 3   | 0.566367  | 0.090588 | 122648933 | 122649446 | 122650032  | 12265279 |
| 145 NA12802 | [2515685 chr5 | 5 | 137835848 | 137844134 | 8287   | 7   | 0.581727  | 0.0613   | 137835611 | 137836085 | 137843310  | 13784495 |
| 146 NA12802 | [2515685 chr5 | 5 | 140203081 | 140218928 | 15848  | 20  | 1.859035  | 0.050252 | 140202344 | 140203819 | 140218508  | 14021934 |
| 147 NA12802 | [2515685 chr5 | 5 | 140534849 | 140540106 | 5258   | 5   | 1.031793  | 0.070703 | 140534700 | 140534999 | 140539007  | 14054120 |
| 148 NA12802 | [2515685 chr5 | 5 | 165157996 | 165161604 | 3609   | 2   | -0.659694 | 0.118119 | 165155280 | 165160712 | 165160802  | 16516240 |
| 149 NA12802 | [2515685 chr5 | 5 | 180309236 | 180363417 | 54182  | 53  | 0.495243  | 0.021196 | 180309103 | 180309370 | 180363120  | 18036371 |
| 150 NA12802 | [2515685 chr5 | 5 | 180764561 | 180820838 | 56278  | 53  | -0.3643   | 0.020538 | 180763713 | 180765409 | 180820785  | 18082089 |

|             |               |   |           |           |        |     |           |          |           |           |           |          |
|-------------|---------------|---|-----------|-----------|--------|-----|-----------|----------|-----------|-----------|-----------|----------|
| 151 NA12802 | [2515685 chr6 | 6 | 3163      | 18689     | 15527  | 4   | 0.71851   | 0.068506 | 1         | 6325      | 15669     | 21709    |
| 152 NA12802 | [2515685 chr6 | 6 | 201823    | 327656    | 125834 | 129 | 0.329947  | 0.012808 | 201415    | 202232    | 326993    | 328320   |
| 153 NA12802 | [2515685 chr6 | 6 | 19149239  | 19156670  | 7432   | 10  | -0.836897 | 0.050964 | 19148813  | 19149665  | 19153876  | 19159461 |
| 154 NA12802 | [2515685 chr6 | 6 | 26860417  | 26861511  | 1095   | 2   | -0.773121 | 0.099095 | 26860088  | 26860746  | 26861212  | 26861811 |
| 155 NA12802 | [2515685 chr6 | 6 | 26959328  | 26980954  | 21627  | 42  | -0.34533  | 0.020863 | 26958921  | 26959735  | 26980886  | 26981021 |
| 156 NA12802 | [2515685 chr6 | 6 | 31316192  | 31346265  | 30074  | 15  | 0.304683  | 0.037294 | 31315812  | 31316572  | 31345931  | 31346591 |
| 157 NA12802 | [2515685 chr6 | 6 | 32590831  | 32591649  | 819    | 2   | -0.808341 | 0.11294  | 32590576  | 32591086  | 32591403  | 32591891 |
| 158 NA12802 | [2515685 chr6 | 6 | 32630637  | 32631716  | 1080   | 2   | 0.997328  | 0.131332 | 32630364  | 32630911  | 32631343  | 32632081 |
| 159 NA12802 | [2515685 chr6 | 6 | 32632349  | 32633889  | 1541   | 3   | 2.093136  | 0.151756 | 32632089  | 32632610  | 32633714  | 32634061 |
| 160 NA12802 | [2515685 chr6 | 6 | 32658787  | 32659901  | 1115   | 2   | 1.734076  | 0.134727 | 32658616  | 32658959  | 32659691  | 32660111 |
| 161 NA12802 | [2515685 chr6 | 6 | 32672888  | 32680221  | 7334   | 6   | 0.460743  | 0.062498 | 32672612  | 32673164  | 32679896  | 32680541 |
| 162 NA12802 | [2515685 chr6 | 6 | 32712720  | 32713791  | 1072   | 2   | 0.791611  | 0.116588 | 32712482  | 32712958  | 32713485  | 32714091 |
| 163 NA12802 | [2515685 chr6 | 6 | 32722647  | 32728733  | 6087   | 2   | 1.282985  | 0.132449 | 32721900  | 32723394  | 32728515  | 32728951 |
| 164 NA12802 | [2515685 chr6 | 6 | 35862833  | 35874426  | 11594  | 13  | 0.419844  | 0.040772 | 35862530  | 35863136  | 35873957  | 35874891 |
| 165 NA12802 | [2515685 chr6 | 6 | 54036900  | 54042384  | 5485   | 5   | 2.815546  | 0.132983 | 54036573  | 54037227  | 54041771  | 54042991 |
| 166 NA12802 | [2515685 chr6 | 6 | 58242567  | 58250099  | 7533   | 7   | -0.312527 | 0.057541 | 58195358  | 58246066  | 58249771  | 58250421 |
| 167 NA12802 | [2515685 chr6 | 6 | 58351907  | 58376078  | 24172  | 52  | -0.281235 | 0.018068 | 58351632  | 58352182  | 58375178  | 58376971 |
| 168 NA12802 | [2515685 chr6 | 6 | 62338502  | 62343650  | 5149   | 2   | -0.657257 | 0.108631 | 62334618  | 62342001  | 62342340  | 62344961 |
| 169 NA12802 | [2515685 chr6 | 6 | 74648985  | 74654614  | 5630   | 10  | -0.76931  | 0.050809 | 74648748  | 74649222  | 74653982  | 74655241 |
| 170 NA12802 | [2515685 chr6 | 6 | 77495034  | 77513510  | 18477  | 12  | -1.41384  | 0.062866 | 77493568  | 77496500  | 77510011  | 77517691 |
| 171 NA12802 | [2515685 chr6 | 6 | 78326767  | 78328478  | 1712   | 2   | -0.50832  | 0.098171 | 78325974  | 78327560  | 78328067  | 78328881 |
| 172 NA12802 | [2515685 chr6 | 6 | 95345535  | 95349338  | 3804   | 5   | -0.917381 | 0.076457 | 95345072  | 95345998  | 95348106  | 95350571 |
| 173 NA12802 | [2515685 chr6 | 6 | 103844685 | 103852411 | 7727   | 2   | 3.38783   | 0.172794 | 103844347 | 103845023 | 103851178 | 10385364 |
| 174 NA12802 | [2515685 chr6 | 6 | 103855469 | 103871201 | 15733  | 12  | 3.410088  | 0.106261 | 103854996 | 103855942 | 103868241 | 10387416 |
| 175 NA12802 | [2515685 chr6 | 6 | 120671191 | 120671916 | 726    | 2   | 0.843898  | 0.115921 | 120670696 | 120671686 | 120671725 | 12067210 |
| 176 NA12802 | [2515685 chr6 | 6 | 144112765 | 144114450 | 1686   | 2   | -0.626642 | 0.106341 | 144112486 | 144113045 | 144114114 | 14411478 |
| 177 NA12802 | [2515685 chr6 | 6 | 160997684 | 161038394 | 40711  | 67  | 0.325601  | 0.014525 | 160997465 | 160997903 | 161038184 | 16103860 |
| 178 NA12802 | [2515685 chr6 | 6 | 161145792 | 161146736 | 945    | 2   | -0.604792 | 0.097782 | 161145603 | 161145982 | 161146411 | 16114706 |
| 179 NA12802 | [2515685 chr6 | 6 | 168152230 | 168344930 | 192701 | 198 | 0.421801  | 0.00917  | 168151798 | 168152663 | 168344541 | 16834531 |
| 180 NA12802 | [2515685 chr6 | 6 | 168350213 | 168416639 | 66427  | 53  | 0.421801  | 0.00917  | 168349968 | 168350458 | 168416010 | 16841726 |
| 181 NA12802 | [2515685 chr6 | 6 | 168453011 | 168456762 | 3752   | 3   | 0.614391  | 0.086592 | 168452611 | 168453411 | 168456200 | 16845732 |
| 182 NA12802 | [2515685 chr6 | 6 | 170603879 | 170604666 | 788    | 2   | -0.489938 | 0.092085 | 170603541 | 170604217 | 170604339 | 17060499 |
| 183 NA12802 | [2515685 chr6 | 6 | 170625506 | 170627028 | 1523   | 3   | 1.608386  | 0.111892 | 170625015 | 170625997 | 170626579 | 17062747 |
| 184 NA12802 | [2515685 chr6 | 6 | 170907234 | 170961492 | 54259  | 42  | -0.377226 | 0.022958 | 170906392 | 170908077 | 170961439 | 17096154 |
| 185 NA12802 | [2515685 chr7 | 7 | 3384111   | 3392458   | 8348   | 8   | 0.856824  | 0.058246 | 3383451   | 3384772   | 3390107   | 3395611  |
| 186 NA12802 | [2515685 chr7 | 7 | 14024131  | 14025556  | 1426   | 5   | -0.454105 | 0.069933 | 14023511  | 14024751  | 14025262  | 14025851 |
| 187 NA12802 | [2515685 chr7 | 7 | 38154080  | 38177664  | 23585  | 27  | -0.310718 | 0.027882 | 38153653  | 38154508  | 38177341  | 38177981 |
| 188 NA12802 | [2515685 chr7 | 7 | 43775620  | 43789873  | 14254  | 17  | 0.446148  | 0.031959 | 43775434  | 43775807  | 43789550  | 43790191 |
| 189 NA12802 | [2515685 chr7 | 7 | 43804424  | 43810179  | 5756   | 7   | 0.523105  | 0.054348 | 43804177  | 43804671  | 43809999  | 43810351 |
| 190 NA12802 | [2515685 chr7 | 7 | 43833235  | 43837328  | 4094   | 4   | 0.505021  | 0.062704 | 43832564  | 43833907  | 43837294  | 43837361 |
| 191 NA12802 | [2515685 chr7 | 7 | 64026650  | 64046357  | 19708  | 53  | -0.258367 | 0.019199 | 64026367  | 64026934  | 64046143  | 64046571 |
| 192 NA12802 | [2515685 chr7 | 7 | 64464087  | 64480934  | 16848  | 45  | -0.255973 | 0.020858 | 64463669  | 64464506  | 64480451  | 64481411 |
| 193 NA12802 | [2515685 chr7 | 7 | 64539824  | 64556662  | 16839  | 47  | -0.260039 | 0.020047 | 64539348  | 64540300  | 64556244  | 64557081 |
| 194 NA12802 | [2515685 chr7 | 7 | 71858493  | 71859326  | 834    | 2   | -0.645787 | 0.08554  | 71858284  | 71858703  | 71858719  | 71859931 |
| 195 NA12802 | [2515685 chr7 | 7 | 72014016  | 72014871  | 856    | 3   | 0.395343  | 0.071276 | 72013991  | 72014042  | 72014598  | 72015141 |
| 196 NA12802 | [2515685 chr7 | 7 | 72156868  | 72157708  | 841    | 2   | -0.645795 | 0.085541 | 72156657  | 72157079  | 72157095  | 72158321 |
| 197 NA12802 | [2515685 chr7 | 7 | 73823778  | 73824413  | 636    | 3   | 0.376995  | 0.074583 | 73823755  | 73823801  | 73824363  | 73824461 |
| 198 NA12802 | [2515685 chr7 | 7 | 74096901  | 74097754  | 854    | 3   | 0.395343  | 0.071276 | 74096630  | 74097173  | 74097729  | 74097781 |
| 199 NA12802 | [2515685 chr7 | 7 | 74511185  | 74511943  | 759    | 3   | 0.395346  | 0.071276 | 74511009  | 74511362  | 74511918  | 74511961 |
| 200 NA12802 | [2515685 chr7 | 7 | 74695370  | 74696139  | 770    | 3   | -0.586358 | 0.074724 | 74695306  | 74695434  | 74695977  | 74696301 |
| 201 NA12802 | [2515685 chr7 | 7 | 75789808  | 75794984  | 5177   | 6   | -0.501137 | 0.063913 | 75789368  | 75790248  | 75794325  | 75795641 |
| 202 NA12802 | [2515685 chr7 | 7 | 89455601  | 89456632  | 1032   | 2   | 3.722291  | 0.20753  | 89455373  | 89455830  | 89456225  | 89457031 |
| 203 NA12802 | [2515685 chr7 | 7 | 97032078  | 97047344  | 15267  | 17  | -1.548228 | 0.051926 | 97031625  | 97032531  | 97046973  | 97047711 |
| 204 NA12802 | [2515685 chr7 | 7 | 101688537 | 101713406 | 24870  | 4   | 0.312105  | 0.059661 | 101684772 | 101690888 | 101713151 | 10171366 |
| 205 NA12802 | [2515685 chr7 | 7 | 101718078 | 101925433 | 207356 | 305 | 0.323147  | 0.004628 | 101717515 | 101718641 | 101924670 | 10192619 |

|             |               |   |           |           |        |     |           |          |           |           |           |          |
|-------------|---------------|---|-----------|-----------|--------|-----|-----------|----------|-----------|-----------|-----------|----------|
| 206 NA12802 | [2515685 chr7 | 7 | 104357758 | 104748830 | 391073 | 384 | 0.323147  | 0.004628 | 104357510 | 104358007 | 104747731 | 10474992 |
| 207 NA12802 | [2515685 chr7 | 7 | 109034783 | 109048749 | 13967  | 10  | 1.425685  | 0.065694 | 109024063 | 109037134 | 109046953 | 10905054 |
| 208 NA12802 | [2515685 chr7 | 7 | 109776378 | 109782655 | 6278   | 5   | 0.92509   | 0.079136 | 109775821 | 109776936 | 109782301 | 10978301 |
| 209 NA12802 | [2515685 chr7 | 7 | 125639507 | 125644775 | 5269   | 6   | -0.764621 | 0.078445 | 125639054 | 125639961 | 125644046 | 12564550 |
| 210 NA12802 | [2515685 chr7 | 7 | 133245202 | 133257360 | 12159  | 13  | 1.694234  | 0.066646 | 133244207 | 133246197 | 133255009 | 13326093 |
| 211 NA12802 | [2515685 chr7 | 7 | 141212522 | 141238966 | 26445  | 27  | 0.4172    | 0.029423 | 141211888 | 141213157 | 141238411 | 14123952 |
| 212 NA12802 | [2515685 chr7 | 7 | 141496492 | 141505136 | 8645   | 11  | -0.354096 | 0.04222  | 141495918 | 141497066 | 141504428 | 14150584 |
| 213 NA12802 | [2515685 chr7 | 7 | 141505136 | 141521690 | 16555  | 20  | -1.306267 | 0.046348 | 141504428 | 141505844 | 141521412 | 14152196 |
| 214 NA12802 | [2515685 chr7 | 7 | 141521690 | 141527443 | 5754   | 9   | -0.298587 | 0.04501  | 141521412 | 141521969 | 141527046 | 14152784 |
| 215 NA12802 | [2515685 chr7 | 7 | 143346673 | 143348067 | 1395   | 5   | -1.707771 | 0.076665 | 143346643 | 143346704 | 143347806 | 14334832 |
| 216 NA12802 | [2515685 chr7 | 7 | 143348067 | 143472403 | 124337 | 234 | 0.282092  | 0.009241 | 143347806 | 143348328 | 143472142 | 14347266 |
| 217 NA12802 | [2515685 chr7 | 7 | 143472403 | 143473797 | 1395   | 5   | -1.707775 | 0.076665 | 143472142 | 143472664 | 143473766 | 14347382 |
| 218 NA12802 | [2515685 chr7 | 7 | 154326166 | 154329090 | 2925   | 3   | 0.622896  | 0.081861 | 154325486 | 154326846 | 154328039 | 15433014 |
| 219 NA12802 | [2515685 chr7 | 7 | 155886350 | 155893882 | 7533   | 5   | -0.509241 | 0.065458 | 155885986 | 155886714 | 155893433 | 15589433 |
| 220 NA12802 | [2515685 chr7 | 7 | 156939035 | 156942423 | 3389   | 5   | 0.312457  | 0.052082 | 156938932 | 156939138 | 156941474 | 15694337 |
| 221 NA12802 | [2515685 chr7 | 7 | 157023614 | 157027930 | 4317   | 7   | 0.315034  | 0.051973 | 157023242 | 157023987 | 157027451 | 15702840 |
| 222 NA12802 | [2515685 chr7 | 7 | 158207288 | 158209880 | 2593   | 2   | 0.914977  | 0.115578 | 158206344 | 158208233 | 158209333 | 15821042 |
| 223 NA12802 | [2515685 chr7 | 7 | 158617060 | 158624379 | 7320   | 6   | 0.692427  | 0.065811 | 158617673 | 158617357 | 158622028 | 15862673 |
| 224 NA12802 | [2515685 chr8 | 8 | 12903     | 67656     | 54754  | 46  | -0.358803 | 0.02202  | 12850     | 12957     | 66815     | 68497    |
| 225 NA12802 | [2515685 chr8 | 8 | 2202770   | 2203520   | 751    | 3   | -1.330195 | 0.092543 | 2202506   | 2203034   | 2203382   | 220365   |
| 226 NA12802 | [2515685 chr8 | 8 | 2238735   | 2253792   | 15058  | 10  | 0.742837  | 0.049928 | 2233839   | 2241488   | 2251039   | 225752   |
| 227 NA12802 | [2515685 chr8 | 8 | 3982836   | 3984535   | 1700   | 2   | -0.808425 | 0.119868 | 3982491   | 3983182   | 3984281   | 398478   |
| 228 NA12802 | [2515685 chr8 | 8 | 3986302   | 3987764   | 1463   | 2   | -1.377698 | 0.136968 | 3986021   | 3986584   | 3987365   | 398816   |
| 229 NA12802 | [2515685 chr8 | 8 | 4819224   | 4821127   | 1904   | 2   | -0.633901 | 0.112084 | 4818781   | 4819667   | 4820670   | 482158   |
| 230 NA12802 | [2515685 chr8 | 8 | 5582875   | 5594011   | 11137  | 9   | 0.720152  | 0.049061 | 5582615   | 5583135   | 5592820   | 559520   |
| 231 NA12802 | [2515685 chr8 | 8 | 6030888   | 6032618   | 1731   | 2   | -0.5963   | 0.114699 | 6030599   | 6031178   | 6032363   | 603287   |
| 232 NA12802 | [2515685 chr8 | 8 | 6813967   | 6815529   | 1563   | 2   | -0.85714  | 0.106148 | 6813560   | 6814375   | 6815199   | 681586   |
| 233 NA12802 | [2515685 chr8 | 8 | 7176337   | 7187950   | 11614  | 33  | 0.59222   | 0.025561 | 7176045   | 7176630   | 7187698   | 718820   |
| 234 NA12802 | [2515685 chr8 | 8 | 7862281   | 7873897   | 11617  | 34  | 0.593633  | 0.024602 | 7862030   | 7862533   | 7873605   | 787419   |
| 235 NA12802 | [2515685 chr8 | 8 | 8323488   | 8328118   | 4631   | 5   | -0.832092 | 0.076814 | 8322712   | 8324265   | 8327620   | 832861   |
| 236 NA12802 | [2515685 chr8 | 8 | 12023134  | 12035286  | 12153  | 33  | 0.580771  | 0.025776 | 12022997  | 12023272  | 12034973  | 1203559  |
| 237 NA12802 | [2515685 chr8 | 8 | 12276602  | 12284041  | 7440   | 14  | 0.622045  | 0.038372 | 12276206  | 12276998  | 12283622  | 1228446  |
| 238 NA12802 | [2515685 chr8 | 8 | 12308417  | 12314107  | 5691   | 9   | -0.255701 | 0.039141 | 12307282  | 12309553  | 12313944  | 1231427  |
| 239 NA12802 | [2515685 chr8 | 8 | 16332169  | 16933821  | 601653 | 581 | 0.828466  | 0.006416 | 16330605  | 16333733  | 16933614  | 1693402  |
| 240 NA12802 | [2515685 chr8 | 8 | 20022286  | 20024771  | 2486   | 2   | -1.068291 | 0.120085 | 20021082  | 20023491  | 20024338  | 2002520  |
| 241 NA12802 | [2515685 chr8 | 8 | 58278355  | 58287850  | 9496   | 8   | 1.162185  | 0.050329 | 58277116  | 58279595  | 58287616  | 5828808  |
| 242 NA12802 | [2515685 chr8 | 8 | 58294677  | 58296106  | 1430   | 2   | 0.828519  | 0.115067 | 58294070  | 58295284  | 58295669  | 5829654  |
| 243 NA12802 | [2515685 chr8 | 8 | 72377031  | 72380286  | 3256   | 3   | -0.52728  | 0.078766 | 72376214  | 72377848  | 72379847  | 7238072  |
| 244 NA12802 | [2515685 chr8 | 8 | 85423649  | 85431920  | 8272   | 7   | 0.932043  | 0.060774 | 85423043  | 85424256  | 85431347  | 8543249  |
| 245 NA12802 | [2515685 chr8 | 8 | 115148105 | 115149916 | 1812   | 2   | -1.118901 | 0.134706 | 115147694 | 115148517 | 115149348 | 11515048 |
| 246 NA12802 | [2515685 chr8 | 8 | 120222661 | 120229952 | 7292   | 6   | 0.843765  | 0.061725 | 120218251 | 120225414 | 120229434 | 12023047 |
| 247 NA12802 | [2515685 chr9 | 9 | 1022      | 25626     | 24605  | 49  | 0.307098  | 0.020365 | 1         | 2044      | 25486     | 25766    |
| 248 NA12802 | [2515685 chr9 | 9 | 12462510  | 12465843  | 3334   | 2   | -0.676056 | 0.119092 | 12461944  | 12463076  | 12463483  | 1246884  |
| 249 NA12802 | [2515685 chr9 | 9 | 19116223  | 19118304  | 2082   | 3   | 0.446265  | 0.081242 | 19115975  | 19116471  | 19117918  | 1911869  |
| 250 NA12802 | [2515685 chr9 | 9 | 42074739  | 42078025  | 3287   | 6   | -0.460994 | 0.052366 | 42074446  | 42075033  | 42077963  | 4207808  |
| 251 NA12802 | [2515685 chr9 | 9 | 42294372  | 42295383  | 1012   | 3   | -0.532542 | 0.070832 | 42294164  | 42294581  | 42295231  | 4229553  |
| 252 NA12802 | [2515685 chr9 | 9 | 42645007  | 42646038  | 1032   | 2   | -0.571155 | 0.078751 | 42644851  | 42645163  | 42645769  | 4264630  |
| 253 NA12802 | [2515685 chr9 | 9 | 42752844  | 42763929  | 11086  | 18  | -0.329503 | 0.027167 | 42751520  | 42754168  | 42763499  | 4276435  |
| 254 NA12802 | [2515685 chr9 | 9 | 42873520  | 42884605  | 11086  | 18  | -0.329503 | 0.027167 | 42872196  | 42874844  | 42884175  | 4288503  |
| 255 NA12802 | [2515685 chr9 | 9 | 43720039  | 43721070  | 1032   | 2   | -0.571155 | 0.078751 | 43719883  | 43720195  | 43721331  | 4372133  |
| 256 NA12802 | [2515685 chr9 | 9 | 65482497  | 65506110  | 23614  | 34  | -0.283184 | 0.021149 | 65432315  | 65484857  | 65505454  | 6550676  |
| 257 NA12802 | [2515685 chr9 | 9 | 67142896  | 67179432  | 36537  | 57  | -0.255991 | 0.017328 | 67142651  | 67143142  | 67179170  | 6717969  |
| 258 NA12802 | [2515685 chr9 | 9 | 67647750  | 67684949  | 37200  | 65  | -0.258018 | 0.01579  | 67647094  | 67648407  | 67684848  | 6768505  |
| 259 NA12802 | [2515685 chr9 | 9 | 67870462  | 67906825  | 36364  | 66  | -0.267868 | 0.015748 | 67869806  | 67871119  | 67906589  | 6790706  |
| 260 NA12802 | [2515685 chr9 | 9 | 101795950 | 101804576 | 8627   | 7   | -0.852228 | 0.061924 | 101795517 | 101796383 | 101803113 | 10180603 |

|             |                |    |           |           |        |      |           |          |           |           |           |           |
|-------------|----------------|----|-----------|-----------|--------|------|-----------|----------|-----------|-----------|-----------|-----------|
| 261 NA12802 | [2515685 chr9  | 9  | 135438421 | 135444067 | 5647   | 2    | 2.133134  | 0.141201 | 135383632 | 135440781 | 135443016 | 13544511. |
| 262 NA12802 | [2515685 chr9  | 9  | 136943182 | 136952873 | 9692   | 6    | -0.645844 | 0.064598 | 136942469 | 136943895 | 136950513 | 13696102  |
| 263 NA12802 | [2515685 chr9  | 9  | 137520450 | 137524423 | 3974   | 6    | -0.311878 | 0.061387 | 137520154 | 137520746 | 137524196 | 13752465  |
| 264 NA12802 | [2515685 chr9  | 9  | 138188003 | 138189923 | 1921   | 45   | 0.535915  | 0.020204 | 138187808 | 138188198 | 138189840 | 13819000  |
| 265 NA12802 | [2515685 chr10 | 10 | 170571    | 172369    | 1799   | 2    | -0.792104 | 0.113189 | 170341    | 170801    | 171237    | 173501    |
| 266 NA12802 | [2515685 chr10 | 10 | 6693908   | 6703893   | 9986   | 8    | 0.809771  | 0.056403 | 6692231   | 6695585   | 6703779   | 6704008   |
| 267 NA12802 | [2515685 chr10 | 10 | 37487278  | 37527174  | 39897  | 61   | -0.38566  | 0.015805 | 37486985  | 37487572  | 37526783  | 37527561  |
| 268 NA12802 | [2515685 chr10 | 10 | 39089454  | 39103103  | 13650  | 29   | -0.33878  | 0.026115 | 39089262  | 39089646  | 39102554  | 39103651  |
| 269 NA12802 | [2515685 chr10 | 10 | 42016838  | 42031937  | 15100  | 28   | -0.341689 | 0.026456 | 42015157  | 42018520  | 42031638  | 42032237  |
| 270 NA12802 | [2515685 chr10 | 10 | 42559247  | 42565662  | 6416   | 10   | -0.266317 | 0.045772 | 42558647  | 42559848  | 42565423  | 42565907  |
| 271 NA12802 | [2515685 chr10 | 10 | 46112775  | 46132737  | 19963  | 35   | -0.323438 | 0.020484 | 46112119  | 46113432  | 46132697  | 46132771  |
| 272 NA12802 | [2515685 chr10 | 10 | 46182371  | 47173707  | 991337 | 1456 | -0.334421 | 0.00345  | 46182194  | 46182549  | 47173507  | 47173907  |
| 273 NA12802 | [2515685 chr10 | 10 | 47228616  | 47231502  | 2887   | 10   | -0.440789 | 0.039803 | 47228514  | 47228719  | 47231201  | 47231807  |
| 274 NA12802 | [2515685 chr10 | 10 | 47723238  | 47736622  | 13385  | 35   | -0.469914 | 0.022882 | 47575187  | 47725982  | 47736534  | 47736711  |
| 275 NA12802 | [2515685 chr10 | 10 | 47739640  | 47806251  | 66612  | 184  | -0.302202 | 0.009629 | 47739505  | 47739775  | 47806074  | 47806421  |
| 276 NA12802 | [2515685 chr10 | 10 | 47887212  | 47887694  | 483    | 2    | -0.740687 | 0.086927 | 47887044  | 47887381  | 47887494  | 47887897  |
| 277 NA12802 | [2515685 chr10 | 10 | 47888084  | 47889830  | 1747   | 6    | -0.47732  | 0.051664 | 47887954  | 47888214  | 47889529  | 47890137  |
| 278 NA12802 | [2515685 chr10 | 10 | 48572137  | 48715124  | 142988 | 287  | -0.329838 | 0.007267 | 48571961  | 48572314  | 48714752  | 48715497  |
| 279 NA12802 | [2515685 chr10 | 10 | 56117212  | 56139275  | 22064  | 20   | -0.937853 | 0.034651 | 56115764  | 56118661  | 56138931  | 56139611  |
| 280 NA12802 | [2515685 chr10 | 10 | 58183046  | 58193752  | 10707  | 10   | -0.830303 | 0.053836 | 58182434  | 58183658  | 58191008  | 58204957  |
| 281 NA12802 | [2515685 chr10 | 10 | 58879708  | 58882015  | 2308   | 5    | -0.842726 | 0.078641 | 58879568  | 58879849  | 58881863  | 58882161  |
| 282 NA12802 | [2515685 chr10 | 10 | 63379429  | 63495083  | 115655 | 2    | 0.574012  | 0.112959 | 63379563  | 63382173  | 63492339  | 63675797  |
| 283 NA12802 | [2515685 chr10 | 10 | 81662845  | 81668479  | 5635   | 8    | -0.294624 | 0.052341 | 81662614  | 81663077  | 81668415  | 81668547  |
| 284 NA12802 | [2515685 chr10 | 10 | 88866216  | 88966295  | 100080 | 111  | -0.348912 | 0.01297  | 88865617  | 88866816  | 88965910  | 88966681  |
| 285 NA12802 | [2515685 chr10 | 10 | 114102241 | 114106477 | 4237   | 5    | 1.064461  | 0.076996 | 114101694 | 114102788 | 114105867 | 11410708  |
| 286 NA12802 | [2515685 chr10 | 10 | 124348266 | 124366738 | 18473  | 24   | -0.509745 | 0.024398 | 124348238 | 124348295 | 124366300 | 12436717  |
| 287 NA12802 | [2515685 chr10 | 10 | 134168766 | 134170259 | 1494   | 17   | -0.369266 | 0.037951 | 134168524 | 134169008 | 134170097 | 13417042  |
| 288 NA12802 | [2515685 chr11 | 11 | 969654    | 971069    | 1416   | 2    | 0.633708  | 0.108009 | 969333    | 969976    | 970737    | 971401    |
| 289 NA12802 | [2515685 chr11 | 11 | 5717038   | 5718491   | 1454   | 2    | 3.441715  | 0.227185 | 5716660   | 5717416   | 5718038   | 5718941   |
| 290 NA12802 | [2515685 chr11 | 11 | 5741269   | 5765993   | 24725  | 32   | 1.966987  | 0.039751 | 5741059   | 5741480   | 5765632   | 5766354   |
| 291 NA12802 | [2515685 chr11 | 11 | 10224778  | 10229788  | 5011   | 5    | 0.599296  | 0.087346 | 10219961  | 10227860  | 10227972  | 10231601  |
| 292 NA12802 | [2515685 chr11 | 11 | 11780222  | 11782174  | 1953   | 2    | -2.037303 | 0.149214 | 11779958  | 11780486  | 11781057  | 11783297  |
| 293 NA12802 | [2515685 chr11 | 11 | 11831868  | 11833089  | 1222   | 2    | 0.963827  | 0.13222  | 11831412  | 11832324  | 11832853  | 11833321  |
| 294 NA12802 | [2515685 chr11 | 11 | 18890733  | 18900882  | 10150  | 9    | 0.306524  | 0.053232 | 18890379  | 18891087  | 18897800  | 18906537  |
| 295 NA12802 | [2515685 chr11 | 11 | 18906905  | 18928671  | 21767  | 30   | 0.890351  | 0.029075 | 18906533  | 18907278  | 18928457  | 18928881  |
| 296 NA12802 | [2515685 chr11 | 11 | 28965605  | 28969186  | 3582   | 5    | 3.520541  | 0.137366 | 28965284  | 28965927  | 28968702  | 28969671  |
| 297 NA12802 | [2515685 chr11 | 11 | 48284073  | 48284771  | 699    | 2    | 0.887767  | 0.094839 | 48283862  | 48284285  | 48284572  | 48284971  |
| 298 NA12802 | [2515685 chr11 | 11 | 49665830  | 49715830  | 50001  | 36   | 0.470344  | 0.025386 | 49665251  | 49666410  | 49712748  | 49721987  |
| 299 NA12802 | [2515685 chr11 | 11 | 55124101  | 55212650  | 88550  | 99   | -0.737764 | 0.016238 | 55123742  | 55124460  | 55209568  | 55215751  |
| 300 NA12802 | [2515685 chr11 | 11 | 73812690  | 73818580  | 5891   | 4    | -0.434378 | 0.0774   | 73812400  | 73812981  | 73818213  | 73818947  |
| 301 NA12802 | [2515685 chr11 | 11 | 88254238  | 88303948  | 49711  | 44   | 0.258942  | 0.022902 | 88254017  | 88254459  | 88303762  | 88304137  |
| 302 NA12802 | [2515685 chr11 | 11 | 89470355  | 89482275  | 11921  | 8    | -0.296371 | 0.048318 | 89469655  | 89471056  | 89482222  | 89482321  |
| 303 NA12802 | [2515685 chr11 | 11 | 134107699 | 134112290 | 4592   | 5    | 0.746955  | 0.069034 | 134106591 | 134108808 | 134111845 | 13411273  |
| 304 NA12802 | [2515685 chr12 | 12 | 2112534   | 2127044   | 14511  | 15   | 0.610865  | 0.040147 | 2109107   | 2115961   | 2126809   | 2127271   |
| 305 NA12802 | [2515685 chr12 | 12 | 6113530   | 6117052   | 3523   | 3    | 0.588812  | 0.098476 | 6111640   | 6115421   | 6116289   | 6117811   |
| 306 NA12802 | [2515685 chr12 | 12 | 9439936   | 9445623   | 5688   | 9    | 0.262763  | 0.046703 | 9439574   | 9440298   | 9445247   | 9446001   |
| 307 NA12802 | [2515685 chr12 | 12 | 9527659   | 9610804   | 83146  | 91   | 0.663826  | 0.017316 | 9526872   | 9528447   | 9610082   | 9611521   |
| 308 NA12802 | [2515685 chr12 | 12 | 9618644   | 9624971   | 6328   | 6    | 0.440591  | 0.06109  | 9617716   | 9619573   | 9623223   | 9626721   |
| 309 NA12802 | [2515685 chr12 | 12 | 11060019  | 11064790  | 4772   | 5    | -0.357814 | 0.066043 | 11059499  | 11060539  | 11064588  | 11064997  |
| 310 NA12802 | [2515685 chr12 | 12 | 11070849  | 11142012  | 71164  | 86   | -0.518257 | 0.016195 | 11069857  | 11071841  | 11141608  | 11142417  |
| 311 NA12802 | [2515685 chr12 | 12 | 31166636  | 31244780  | 78145  | 74   | 0.397261  | 0.017492 | 31164617  | 31168656  | 31244217  | 31245347  |
| 312 NA12802 | [2515685 chr12 | 12 | 46994634  | 46995975  | 1342   | 2    | -1.90488  | 0.168356 | 46994358  | 46994911  | 46995667  | 46996287  |
| 313 NA12802 | [2515685 chr12 | 12 | 59809796  | 59818799  | 9004   | 2    | 0.749622  | 0.108096 | 59809393  | 59810200  | 59817238  | 59820367  |
| 314 NA12802 | [2515685 chr12 | 12 | 69156922  | 69167886  | 10965  | 11   | 0.744082  | 0.04731  | 69138649  | 69160412  | 69164396  | 69215017  |
| 315 NA12802 | [2515685 chr12 | 12 | 131045346 | 131046750 | 1405   | 4    | -0.412928 | 0.076436 | 131044859 | 131045834 | 131046551 | 131046947 |

|             |                |    |           |           |        |     |                    |           |           |           |           |
|-------------|----------------|----|-----------|-----------|--------|-----|--------------------|-----------|-----------|-----------|-----------|
| 316 NA12802 | [2515685 chr13 | 13 | 31430484  | 31437209  | 6726   | 7   | -0.65642 0.062377  | 31430130  | 31430838  | 31436488  | 31437937  |
| 317 NA12802 | [2515685 chr13 | 13 | 33029571  | 33043421  | 13851  | 9   | 0.851911 0.055534  | 33000262  | 33034253  | 33042925  | 33043911  |
| 318 NA12802 | [2515685 chr13 | 13 | 33852305  | 33853351  | 1047   | 2   | -0.575165 0.102262 | 33852033  | 33852578  | 33853063  | 33853631  |
| 319 NA12802 | [2515685 chr13 | 13 | 56611711  | 56645734  | 34024  | 47  | 0.610071 0.016402  | 56610946  | 56612477  | 56645321  | 56646147  |
| 320 NA12802 | [2515685 chr13 | 13 | 69633905  | 69673289  | 39385  | 42  | 0.823546 0.024738  | 69633412  | 69634399  | 69632985  | 69637359  |
| 321 NA12802 | [2515685 chr13 | 13 | 109215660 | 109217089 | 1430   | 5   | -0.383637 0.053946 | 109215230 | 109216090 | 109216885 | 10921729  |
| 322 NA12802 | [2515685 chr13 | 13 | 113079647 | 113086820 | 7174   | 3   | 0.63538 0.090699   | 113078890 | 113080404 | 113082138 | 11309434  |
| 323 NA12802 | [2515685 chr14 | 14 | 18527136  | 18542743  | 15608  | 7   | -0.74019 0.055685  | 18526373  | 18527899  | 18541619  | 18543867  |
| 324 NA12802 | [2515685 chr14 | 14 | 18662441  | 18669222  | 6782   | 20  | -0.324121 0.030096 | 18662216  | 18662666  | 18669049  | 18669391  |
| 325 NA12802 | [2515685 chr14 | 14 | 19265232  | 19494842  | 229611 | 212 | 0.534817 0.010322  | 19261661  | 19268804  | 19494444  | 19495247  |
| 326 NA12802 | [2515685 chr14 | 14 | 37868820  | 37873371  | 4552   | 6   | -0.919407 0.070033 | 37868221  | 37869420  | 37873115  | 37873621  |
| 327 NA12802 | [2515685 chr14 | 14 | 73063171  | 73073533  | 10363  | 10  | 0.295978 0.044794  | 73061866  | 73064476  | 73073266  | 73073801  |
| 328 NA12802 | [2515685 chr14 | 14 | 73077249  | 73119729  | 42481  | 37  | 0.436185 0.024265  | 73076337  | 73078161  | 73118276  | 73121187  |
| 329 NA12802 | [2515685 chr15 | 15 | 18539408  | 18565377  | 25970  | 26  | -0.282722 0.024611 | 18539239  | 18539578  | 18563074  | 18572407  |
| 330 NA12802 | [2515685 chr15 | 15 | 18842373  | 18849369  | 6997   | 12  | -0.735109 0.043586 | 18842153  | 18842593  | 18848726  | 18850017  |
| 331 NA12802 | [2515685 chr15 | 15 | 19019341  | 19024980  | 5640   | 10  | -0.397928 0.037658 | 19019170  | 19019513  | 19024754  | 19025201  |
| 332 NA12802 | [2515685 chr15 | 15 | 19463903  | 19466041  | 2139   | 2   | 0.624688 0.090006  | 19462767  | 19465039  | 19465387  | 19466691  |
| 333 NA12802 | [2515685 chr15 | 15 | 19815355  | 19833276  | 17922  | 19  | 0.271532 0.033208  | 19812016  | 19817658  | 19832982  | 19833571  |
| 334 NA12802 | [2515685 chr15 | 15 | 19843733  | 19844483  | 751    | 2   | -0.690146 0.100675 | 19843516  | 19843950  | 19844295  | 19844677  |
| 335 NA12802 | [2515685 chr15 | 15 | 19874952  | 19883216  | 8265   | 11  | -0.337094 0.046029 | 19874718  | 19875187  | 19882739  | 19883697  |
| 336 NA12802 | [2515685 chr15 | 15 | 20222440  | 20252359  | 29920  | 44  | -0.318867 0.020601 | 20221745  | 20223135  | 20251841  | 20252877  |
| 337 NA12802 | [2515685 chr15 | 15 | 20970321  | 20983811  | 13491  | 21  | -0.339193 0.027912 | 20970312  | 20970331  | 20983585  | 20984037  |
| 338 NA12802 | [2515685 chr15 | 15 | 21606753  | 21614601  | 7849   | 7   | 0.91787 0.068451   | 21606459  | 21607047  | 21612298  | 21636691  |
| 339 NA12802 | [2515685 chr15 | 15 | 21883856  | 21896735  | 12880  | 14  | 0.328092 0.020602  | 21881407  | 21886159  | 21896535  | 21896931  |
| 340 NA12802 | [2515685 chr15 | 15 | 21898127  | 21928308  | 30182  | 31  | 0.328092 0.020602  | 21898017  | 21898237  | 21927233  | 21929387  |
| 341 NA12802 | [2515685 chr15 | 15 | 21930852  | 21952141  | 21290  | 15  | -0.327671 0.038058 | 21929383  | 21932321  | 21950002  | 21954287  |
| 342 NA12802 | [2515685 chr15 | 15 | 21982623  | 21983623  | 1001   | 2   | -0.661574 0.110512 | 21982472  | 21982774  | 21983412  | 21983837  |
| 343 NA12802 | [2515685 chr15 | 15 | 22038706  | 22329726  | 291021 | 308 | 0.421841 0.008322  | 22038510  | 22038902  | 22329388  | 22330067  |
| 344 NA12802 | [2515685 chr15 | 15 | 22365004  | 22371468  | 6465   | 7   | 0.39328 0.051924   | 22364338  | 22365670  | 22371379  | 22371557  |
| 345 NA12802 | [2515685 chr15 | 15 | 24986053  | 24992250  | 6198   | 7   | 0.780848 0.060131  | 24985426  | 24986680  | 24991680  | 24992821  |
| 346 NA12802 | [2515685 chr15 | 15 | 26168435  | 26174839  | 6405   | 10  | -0.301118 0.044206 | 26168147  | 26168723  | 26174441  | 26175237  |
| 347 NA12802 | [2515685 chr15 | 15 | 32504316  | 32506176  | 1861   | 2   | 0.482744 0.018089  | 32503998  | 32504634  | 32505444  | 32506901  |
| 348 NA12802 | [2515685 chr15 | 15 | 32515477  | 32592025  | 76549  | 64  | 0.482744 0.018089  | 32514954  | 32516000  | 32591791  | 32592261  |
| 349 NA12802 | [2515685 chr15 | 15 | 32638982  | 32640064  | 1083   | 2   | 0.588456 0.101231  | 32638493  | 32639472  | 32639564  | 32640567  |
| 350 NA12802 | [2515685 chr15 | 15 | 35705047  | 35707323  | 2277   | 3   | 0.457288 0.091397  | 35704626  | 35705468  | 35706791  | 35707851  |
| 351 NA12802 | [2515685 chr15 | 15 | 75117585  | 75119946  | 2362   | 4   | -1.566818 0.110003 | 75117343  | 75117827  | 75119741  | 75120157  |
| 352 NA12802 | [2515685 chr15 | 15 | 80588100  | 80588985  | 886    | 2   | -0.879644 0.082574 | 80587699  | 80588502  | 80588602  | 80589361  |
| 353 NA12802 | [2515685 chr15 | 15 | 80982676  | 80983561  | 886    | 2   | -0.879632 0.082574 | 80982275  | 80983078  | 80983178  | 80983394  |
| 354 NA12802 | [2515685 chr15 | 15 | 83581911  | 83582575  | 665    | 2   | -0.879644 0.082574 | 83581731  | 83582092  | 83582192  | 83582951  |
| 355 NA12802 | [2515685 chr15 | 15 | 83685983  | 83688723  | 2741   | 2   | -0.627795 0.113629 | 83684729  | 83687238  | 83687705  | 8368974   |
| 356 NA12802 | [2515685 chr15 | 15 | 98234084  | 98240716  | 6633   | 8   | 0.850913 0.061201  | 98233842  | 98234327  | 98239350  | 98242087  |
| 357 NA12802 | [2515685 chr15 | 15 | 100109640 | 100122682 | 13043  | 98  | 0.770951 0.011807  | 100108905 | 100110376 | 100122315 | 100123057 |
| 358 NA12802 | [2515685 chr15 | 15 | 100264033 | 100337837 | 73805  | 65  | 0.348855 0.017772  | 100263857 | 100264210 | 100336759 | 10033891  |
| 359 NA12802 | [2515685 chr16 | 16 | 948831    | 952527    | 3697   | 39  | 0.333157 0.017821  | 947314    | 950349    | 952191    | 952867    |
| 360 NA12802 | [2515685 chr16 | 16 | 2638196   | 2640225   | 2030   | 3   | -2.264734 0.141468 | 2637783   | 2638609   | 2639826   | 2640627   |
| 361 NA12802 | [2515685 chr16 | 16 | 10107199  | 10109549  | 2351   | 3   | 0.420498 0.082533  | 10106939  | 10107460  | 10108971  | 10110121  |
| 362 NA12802 | [2515685 chr16 | 16 | 16633469  | 16639120  | 5652   | 4   | 0.499044 0.072091  | 16632502  | 16634437  | 16638386  | 16639857  |
| 363 NA12802 | [2515685 chr16 | 16 | 21475665  | 21502620  | 26956  | 19  | 0.360948 0.034017  | 21475438  | 21475893  | 21501101  | 21504147  |
| 364 NA12802 | [2515685 chr16 | 16 | 22521651  | 22618743  | 97093  | 84  | 0.330574 0.015757  | 22521425  | 22521878  | 22617181  | 22620301  |
| 365 NA12802 | [2515685 chr16 | 16 | 28324617  | 28335549  | 10933  | 10  | 0.26312 0.04601    | 28324569  | 28324665  | 28334190  | 28336901  |
| 366 NA12802 | [2515685 chr16 | 16 | 28617225  | 28628077  | 10853  | 11  | 0.261354 0.044322  | 28615757  | 28618694  | 28627777  | 28628377  |
| 367 NA12802 | [2515685 chr16 | 16 | 32150890  | 32200550  | 49661  | 117 | -0.274073 0.011879 | 32150057  | 32151724  | 32200419  | 32200687  |
| 368 NA12802 | [2515685 chr16 | 16 | 32210096  | 32219640  | 9545   | 19  | 0.296805 0.027435  | 32209551  | 32210641  | 32219531  | 32219747  |
| 369 NA12802 | [2515685 chr16 | 16 | 32567958  | 32616183  | 48226  | 121 | -0.295157 0.011655 | 32567582  | 32568335  | 32615350  | 32617017  |
| 370 NA12802 | [2515685 chr16 | 16 | 33091854  | 33196051  | 104198 | 241 | -0.288631 0.008159 | 33091021  | 33092688  | 33195879  | 33196227  |

|             |                |    |          |          |        |     |           |          |          |          |          |          |
|-------------|----------------|----|----------|----------|--------|-----|-----------|----------|----------|----------|----------|----------|
| 371 NA12802 | [2515685 chr16 | 16 | 33207215 | 33217055 | 9841   | 18  | 0.308375  | 0.028692 | 33206951 | 33207480 | 33216946 | 3321716! |
| 372 NA12802 | [2515685 chr16 | 16 | 33392689 | 33397742 | 5054   | 10  | 0.276364  | 0.042933 | 33392062 | 33393316 | 33397495 | 3339799! |
| 373 NA12802 | [2515685 chr16 | 16 | 33495147 | 33518572 | 23426  | 21  | 0.336535  | 0.031972 | 33494765 | 33495529 | 33518236 | 3351890! |
| 374 NA12802 | [2515685 chr16 | 16 | 33720146 | 33723491 | 3346   | 5   | 0.325151  | 0.062208 | 33716428 | 33722027 | 33723206 | 3372377! |
| 375 NA12802 | [2515685 chr16 | 16 | 34321825 | 34609074 | 287250 | 323 | -0.460411 | 0.00836  | 34317185 | 34323706 | 34607193 | 3461732! |
| 376 NA12802 | [2515685 chr16 | 16 | 57204541 | 57207585 | 3045   | 3   | 4.410484  | 0.178064 | 57204170 | 57204913 | 57206938 | 5720823! |
| 377 NA12802 | [2515685 chr16 | 16 | 68704278 | 68746280 | 42003  | 45  | -0.298779 | 0.021933 | 68704076 | 68704480 | 68745915 | 6874664! |
| 378 NA12802 | [2515685 chr16 | 16 | 84562720 | 84565235 | 2516   | 11  | 0.499305  | 0.043876 | 84561685 | 84563756 | 84565142 | 8456532! |
| 379 NA12802 | [2515685 chr17 | 17 | 911980   | 915554   | 3575   | 4   | 0.530085  | 0.077306 | 911452   | 912508   | 915413   | 91569!   |
| 380 NA12802 | [2515685 chr17 | 17 | 966845   | 969578   | 2734   | 21  | 0.360412  | 0.034983 | 966537   | 967154   | 969378   | 96977!   |
| 381 NA12802 | [2515685 chr17 | 17 | 18331739 | 18332345 | 607    | 2   | -0.955613 | 0.109355 | 18331509 | 18331970 | 18331978 | 1833271! |
| 382 NA12802 | [2515685 chr17 | 17 | 20299935 | 20300531 | 597    | 2   | -0.955613 | 0.109355 | 20299568 | 20300303 | 20300311 | 2030075! |
| 383 NA12802 | [2515685 chr17 | 17 | 21945626 | 21954909 | 9284   | 15  | -0.353795 | 0.03759  | 21945338 | 21945915 | 21954628 | 2195519! |
| 384 NA12802 | [2515685 chr17 | 17 | 31540491 | 31561972 | 21482  | 37  | -0.31217  | 0.020589 | 31540349 | 31540633 | 31561747 | 3156219! |
| 385 NA12802 | [2515685 chr17 | 17 | 31628632 | 31663546 | 34915  | 52  | -0.287649 | 0.016871 | 31628413 | 31628852 | 31663313 | 3166378! |
| 386 NA12802 | [2515685 chr17 | 17 | 36675530 | 36685343 | 9814   | 10  | -0.724988 | 0.0509   | 36675011 | 36676049 | 36684647 | 3668604! |
| 387 NA12802 | [2515685 chr17 | 17 | 40953332 | 40967307 | 13976  | 17  | 0.307186  | 0.033392 | 40952822 | 40953843 | 40967191 | 4096742! |
| 388 NA12802 | [2515685 chr17 | 17 | 41006614 | 41017119 | 10506  | 13  | -0.270699 | 0.04202  | 41006215 | 41007013 | 41061872 | 4101736! |
| 389 NA12802 | [2515685 chr17 | 17 | 41747612 | 41762764 | 15153  | 15  | 0.36044   | 0.032555 | 41747392 | 41747832 | 41762258 | 4176327! |
| 390 NA12802 | [2515685 chr17 | 17 | 41775463 | 42137410 | 361948 | 397 | 0.443387  | 0.006217 | 41775199 | 41775728 | 42135210 | 4214194! |
| 391 NA12802 | [2515685 chr17 | 17 | 42905976 | 42908985 | 3010   | 2   | 0.840846  | 0.121776 | 42905585 | 42906368 | 42906957 | 4291101! |
| 392 NA12802 | [2515685 chr17 | 17 | 75223639 | 75225100 | 1462   | 4   | -0.285087 | 0.055493 | 75223385 | 75223893 | 75224893 | 7522530! |
| 393 NA12802 | [2515685 chr18 | 18 | 14547645 | 14589883 | 42239  | 44  | 0.258014  | 0.022045 | 14547186 | 14548104 | 14589685 | 1459008! |
| 394 NA12802 | [2515685 chr18 | 18 | 14702025 | 14703577 | 1553   | 2   | -0.687949 | 0.120431 | 14701431 | 14702619 | 14703103 | 1470405! |
| 395 NA12802 | [2515685 chr18 | 18 | 28142218 | 28143399 | 1182   | 2   | 0.822082  | 0.127193 | 28141854 | 28142583 | 28143055 | 2814374! |
| 396 NA12802 | [2515685 chr18 | 18 | 42797012 | 42815379 | 18368  | 21  | -0.420751 | 0.029076 | 42796537 | 42797488 | 42810800 | 4288915! |
| 397 NA12802 | [2515685 chr18 | 18 | 61874791 | 61883105 | 8315   | 9   | -0.846338 | 0.052877 | 61874483 | 61875100 | 61882738 | 6188347! |
| 398 NA12802 | [2515685 chr18 | 18 | 61917747 | 61920171 | 2425   | 4   | 2.931358  | 0.129641 | 61917522 | 61917973 | 61919646 | 6192069! |
| 399 NA12802 | [2515685 chr18 | 18 | 62058195 | 62062616 | 4422   | 6   | -0.685825 | 0.06564  | 62057838 | 62058553 | 62062153 | 6206307! |
| 400 NA12802 | [2515685 chr18 | 18 | 74392800 | 74397377 | 4578   | 3   | 0.860947  | 0.104297 | 74390826 | 74394774 | 74396965 | 7439779! |
| 401 NA12802 | [2515685 chr19 | 19 | 14613    | 79338    | 64726  | 61  | 0.415731  | 0.018447 | 14437    | 14790    | 79338    | 79338    |
| 402 NA12802 | [2515685 chr19 | 19 | 252671   | 255224   | 2554   | 8   | 0.253746  | 0.04871  | 251836   | 253507   | 254742   | 255707   |
| 403 NA12802 | [2515685 chr19 | 19 | 310414   | 312953   | 2540   | 14  | -0.474734 | 0.040069 | 309687   | 311142   | 312913   | 31299!   |
| 404 NA12802 | [2515685 chr19 | 19 | 8704062  | 8705799  | 1738   | 2   | 0.472973  | 0.092341 | 8703659  | 8704466  | 8704912  | 870668!  |
| 405 NA12802 | [2515685 chr19 | 19 | 8708780  | 8763535  | 54756  | 94  | 0.599937  | 0.012211 | 8708296  | 8709264  | 8763160  | 876391!  |
| 406 NA12802 | [2515685 chr19 | 19 | 15622624 | 15636904 | 14281  | 6   | -0.337432 | 0.063462 | 15621314 | 15623935 | 15636048 | 1563776! |
| 407 NA12802 | [2515685 chr19 | 19 | 20388989 | 20510144 | 121156 | 67  | -0.465729 | 0.01902  | 20388802 | 20389176 | 20509558 | 2051073! |
| 408 NA12802 | [2515685 chr19 | 19 | 22931049 | 22934759 | 3711   | 3   | 0.728749  | 0.103205 | 22918199 | 22933577 | 22934546 | 2293497! |
| 409 NA12802 | [2515685 chr19 | 19 | 23007903 | 23013841 | 5939   | 6   | 0.801025  | 0.069724 | 22990964 | 23010431 | 23013525 | 2301415! |
| 410 NA12802 | [2515685 chr19 | 19 | 23108259 | 23109446 | 1188   | 2   | -0.721333 | 0.130287 | 23107903 | 23108615 | 23108879 | 2311001! |
| 411 NA12802 | [2515685 chr19 | 19 | 23257205 | 23258538 | 1334   | 2   | -0.817036 | 0.118836 | 23256882 | 23257529 | 23258213 | 2325886! |
| 412 NA12802 | [2515685 chr19 | 19 | 23597182 | 23600235 | 3054   | 5   | -0.747791 | 0.069372 | 23596541 | 23597823 | 23599600 | 2360087! |
| 413 NA12802 | [2515685 chr19 | 19 | 39419837 | 39421349 | 1513   | 3   | 0.507606  | 0.093183 | 39419616 | 39420059 | 39421018 | 3942168! |
| 414 NA12802 | [2515685 chr19 | 19 | 40540866 | 40541878 | 1013   | 3   | -0.849715 | 0.08967  | 40540646 | 40541086 | 40541551 | 4054220! |
| 415 NA12802 | [2515685 chr19 | 19 | 40543556 | 40545135 | 1580   | 3   | -2.443809 | 0.139389 | 40543292 | 40543821 | 40544782 | 4054548! |
| 416 NA12802 | [2515685 chr19 | 19 | 40547370 | 40553596 | 6227   | 2   | -4.222303 | 0.251136 | 40546632 | 40548109 | 40553353 | 4055384! |
| 417 NA12802 | [2515685 chr19 | 19 | 40553596 | 40554347 | 752    | 2   | -0.634115 | 0.101205 | 40553353 | 40553840 | 40554020 | 4055467! |
| 418 NA12802 | [2515685 chr19 | 19 | 41532761 | 41540854 | 8094   | 2   | -0.827212 | 0.128909 | 41532090 | 41533433 | 41538691 | 4154301! |
| 419 NA12802 | [2515685 chr19 | 19 | 45412775 | 45413556 | 782    | 2   | -0.5851   | 0.099316 | 45412566 | 45412985 | 45413285 | 4541382! |
| 420 NA12802 | [2515685 chr19 | 19 | 48406765 | 48454177 | 47413  | 26  | 0.254838  | 0.028269 | 48406231 | 48407299 | 48453993 | 4845436! |
| 421 NA12802 | [2515685 chr19 | 19 | 53100142 | 53151974 | 51833  | 98  | -0.383285 | 0.011726 | 53098980 | 53101305 | 53151638 | 5315231! |
| 422 NA12802 | [2515685 chr19 | 19 | 55285877 | 55336157 | 50281  | 104 | -0.379553 | 0.011308 | 55285730 | 55286025 | 55335244 | 5533707! |
| 423 NA12802 | [2515685 chr19 | 19 | 56824422 | 56841964 | 17543  | 21  | -0.495176 | 0.031009 | 56824136 | 56824709 | 56841608 | 5684232! |
| 424 NA12802 | [2515685 chr19 | 19 | 58209430 | 58245460 | 36031  | 28  | -0.31669  | 0.027241 | 58208997 | 58209863 | 58245024 | 5824589! |
| 425 NA12802 | [2515685 chr19 | 19 | 59249340 | 59252061 | 2722   | 4   | 0.924079  | 0.081035 | 59249084 | 59249597 | 59251854 | 5925226! |



|             |                |    |           |           |        |     |           |          |           |           |           |           |
|-------------|----------------|----|-----------|-----------|--------|-----|-----------|----------|-----------|-----------|-----------|-----------|
| 426 NA12802 | [2515685 chr19 | 19 | 59790498  | 59792413  | 1916   | 2   | 0.736856  | 0.098904 | 59790016  | 59790980  | 59791458  | 59793361  |
| 427 NA12802 | [2515685 chr19 | 19 | 59939483  | 59993327  | 53845  | 66  | 0.284453  | 0.017792 | 59939167  | 59939799  | 59993019  | 59993631  |
| 428 NA12802 | [2515685 chr19 | 19 | 60026704  | 60039807  | 13104  | 17  | 0.28384   | 0.034822 | 60025232  | 60028176  | 60039278  | 60040331  |
| 429 NA12802 | [2515685 chr19 | 19 | 60044873  | 60052442  | 7570   | 8   | 0.384798  | 0.051533 | 60043738  | 60046008  | 60052027  | 60052851  |
| 430 NA12802 | [2515685 chr19 | 19 | 60058975  | 60069367  | 10393  | 6   | 0.310629  | 0.058247 | 60058682  | 60059268  | 60069010  | 60069721  |
| 431 NA12802 | [2515685 chr20 | 20 | 15249645  | 15251805  | 2161   | 2   | -0.866676 | 0.104748 | 15249381  | 15249909  | 15251287  | 15252321  |
| 432 NA12802 | [2515685 chr20 | 20 | 26147697  | 26161501  | 13805  | 23  | -0.34473  | 0.030165 | 26147451  | 26147944  | 26161227  | 26161771  |
| 433 NA12802 | [2515685 chr20 | 20 | 59951513  | 59957050  | 5538   | 18  | 1.53776   | 0.04025  | 59950681  | 59952345  | 59956538  | 59957561  |
| 434 NA12802 | [2515685 chr20 | 20 | 62066380  | 62068214  | 1835   | 8   | 0.936079  | 0.05571  | 62066146  | 62066615  | 62067671  | 62068751  |
| 435 NA12802 | [2515685 chr20 | 20 | 62233505  | 62235897  | 2393   | 4   | 0.427013  | 0.056656 | 62232847  | 62234163  | 62235101  | 62236691  |
| 436 NA12802 | [2515685 chr21 | 21 | 13738548  | 13739792  | 1245   | 2   | -0.91077  | 0.115105 | 13738070  | 13739027  | 13739487  | 13740091  |
| 437 NA12802 | [2515685 chr22 | 22 | 15726344  | 15763303  | 36960  | 23  | -0.262908 | 0.028348 | 15724940  | 15727749  | 15761604  | 15765001  |
| 438 NA12802 | [2515685 chr22 | 22 | 17032140  | 17135187  | 103048 | 158 | -0.270561 | 0.018080 | 17031480  | 17032801  | 17134882  | 17135491  |
| 439 NA12802 | [2515685 chr22 | 22 | 17225268  | 17246485  | 21218  | 48  | -0.279369 | 0.019684 | 17224868  | 17225668  | 17246147  | 17246821  |
| 440 NA12802 | [2515685 chr22 | 22 | 17385504  | 17394963  | 9460   | 17  | -0.258803 | 0.036012 | 17385031  | 17385977  | 17394595  | 17395331  |
| 441 NA12802 | [2515685 chr22 | 22 | 18714933  | 18967030  | 252098 | 243 | -0.299412 | 0.009001 | 18714633  | 18715233  | 18966730  | 18967331  |
| 442 NA12802 | [2515685 chr22 | 22 | 19380073  | 19419484  | 39412  | 12  | -0.343819 | 0.041647 | 19377752  | 19382395  | 19416806  | 19449921  |
| 443 NA12802 | [2515685 chr22 | 22 | 20002496  | 20121795  | 119300 | 164 | -0.288005 | 0.011092 | 20002065  | 20002927  | 20121548  | 20122041  |
| 444 NA12802 | [2515685 chr22 | 22 | 20137248  | 20209861  | 72614  | 105 | -0.329188 | 0.014086 | 20136561  | 20137935  | 20209409  | 20210311  |
| 445 NA12802 | [2515685 chr22 | 22 | 22672624  | 22720154  | 47531  | 48  | 0.920167  | 0.025634 | 22672391  | 22672858  | 22719882  | 22720421  |
| 446 NA12802 | [2515685 chr22 | 22 | 33619409  | 33622591  | 3183   | 4   | 0.860085  | 0.074735 | 33618939  | 33619879  | 33622541  | 33622641  |
| 447 NA12802 | [2515685 chr22 | 22 | 37617530  | 37624009  | 6480   | 8   | -0.804903 | 0.058184 | 37616333  | 37618728  | 37621331  | 37627051  |
| 1 NA18537   | [2515685 chr1  | 1  | 29401     | 71292     | 41892  | 51  | 0.303591  | 0.020281 | 27752     | 31050     | 70533     | 72052     |
| 2 NA18537   | [2515685 chr1  | 1  | 435144    | 435732    | 589    | 2   | -0.804903 | 0.112345 | 435109    | 435179    | 435179    | 436286    |
| 3 NA18537   | [2515685 chr1  | 1  | 601047    | 612159    | 11113  | 7   | -1.096238 | 0.060272 | 587801    | 604315    | 610122    | 614196    |
| 4 NA18537   | [2515685 chr1  | 1  | 631948    | 663935    | 31988  | 50  | -0.264759 | 0.020443 | 631772    | 632125    | 663652    | 664218    |
| 5 NA18537   | [2515685 chr1  | 1  | 1596828   | 1715812   | 118985 | 86  | 0.295667  | 0.015461 | 1595897   | 1597760   | 1715548   | 1716076   |
| 6 NA18537   | [2515685 chr1  | 1  | 12843376  | 12855470  | 12095  | 22  | 0.30525   | 0.030768 | 12843104  | 12843649  | 12855210  | 12855731  |
| 7 NA18537   | [2515685 chr1  | 1  | 12884329  | 12886858  | 2530   | 4   | 0.518769  | 0.065945 | 12884224  | 12884434  | 12886536  | 12887181  |
| 8 NA18537   | [2515685 chr1  | 1  | 12926542  | 12926956  | 415    | 2   | -0.680349 | 0.115484 | 12926307  | 12926778  | 12926804  | 12927101  |
| 9 NA18537   | [2515685 chr1  | 1  | 13069202  | 13074923  | 5722   | 4   | -0.615809 | 0.073213 | 13015127  | 13072470  | 13074668  | 13075171  |
| 10 NA18537  | [2515685 chr1  | 1  | 13086012  | 13091899  | 5888   | 3   | -0.732777 | 0.080011 | 13085102  | 13086922  | 13091561  | 13092231  |
| 11 NA18537  | [2515685 chr1  | 1  | 13159940  | 13162706  | 2767   | 4   | 0.546439  | 0.063074 | 13159618  | 13160263  | 13162366  | 13163041  |
| 12 NA18537  | [2515685 chr1  | 1  | 13216105  | 13221017  | 4913   | 6   | -0.332621 | 0.052326 | 13214189  | 13218021  | 13220643  | 13221391  |
| 13 NA18537  | [2515685 chr1  | 1  | 13229863  | 13236812  | 6950   | 3   | -0.630582 | 0.076657 | 13228358  | 13231368  | 13236616  | 13237001  |
| 14 NA18537  | [2515685 chr1  | 1  | 13380737  | 13383503  | 2767   | 4   | 0.546439  | 0.063074 | 13380415  | 13381060  | 13383163  | 13383884  |
| 15 NA18537  | [2515685 chr1  | 1  | 13436941  | 13441853  | 4913   | 6   | -0.332621 | 0.052326 | 13435025  | 13438857  | 13441479  | 13442221  |
| 16 NA18537  | [2515685 chr1  | 1  | 13451600  | 13457066  | 5467   | 2   | -0.621958 | 0.086872 | 13451001  | 13452200  | 13456679  | 13457451  |
| 17 NA18537  | [2515685 chr1  | 1  | 16547682  | 16555358  | 7677   | 9   | -0.27607  | 0.045893 | 16547030  | 16548335  | 16555011  | 16555701  |
| 18 NA18537  | [2515685 chr1  | 1  | 16975906  | 17025696  | 49791  | 53  | -0.310492 | 0.020524 | 16975406  | 16976406  | 17025553  | 17025841  |
| 19 NA18537  | [2515685 chr1  | 1  | 25329004  | 25381274  | 52271  | 50  | 0.252423  | 0.016375 | 25328634  | 25329374  | 25380813  | 25381731  |
| 20 NA18537  | [2515685 chr1  | 1  | 25391148  | 25409301  | 18154  | 24  | 0.252423  | 0.016375 | 25390773  | 25391523  | 25408840  | 25409761  |
| 21 NA18537  | [2515685 chr1  | 1  | 25434181  | 25439981  | 5801   | 14  | 0.254639  | 0.039146 | 25433990  | 25434373  | 25438920  | 25441041  |
| 22 NA18537  | [2515685 chr1  | 1  | 31389309  | 31391602  | 2294   | 2   | -0.717026 | 0.092959 | 31389069  | 31389549  | 31390654  | 31392551  |
| 23 NA18537  | [2515685 chr1  | 1  | 103934476 | 103939709 | 5234   | 8   | 0.284766  | 0.049161 | 103934188 | 103934764 | 103937206 | 10394221  |
| 24 NA18537  | [2515685 chr1  | 1  | 105728161 | 105735462 | 7302   | 8   | -0.876789 | 0.060405 | 105727820 | 105728503 | 105734532 | 10573639  |
| 25 NA18537  | [2515685 chr1  | 1  | 108514938 | 108565175 | 50238  | 59  | 0.341311  | 0.019643 | 108514864 | 108515012 | 108565023 | 10856532  |
| 26 NA18537  | [2515685 chr1  | 1  | 108638096 | 108688767 | 50672  | 60  | 0.33833   | 0.01941  | 108637939 | 108638254 | 108688693 | 10868884  |
| 27 NA18537  | [2515685 chr1  | 1  | 109936541 | 109953240 | 16700  | 22  | 0.431091  | 0.031061 | 109935803 | 109937279 | 109952761 | 109953721 |
| 28 NA18537  | [2515685 chr1  | 1  | 109954457 | 109955935 | 1479   | 2   | 0.707615  | 0.140282 | 109954248 | 109954666 | 109955709 | 10995616  |
| 29 NA18537  | [2515685 chr1  | 1  | 116870606 | 116915240 | 44635  | 54  | -0.429755 | 0.020142 | 116869172 | 116872040 | 116914887 | 11691559  |
| 30 NA18537  | [2515685 chr1  | 1  | 141971552 | 141976719 | 5168   | 17  | 0.287104  | 0.031902 | 141971472 | 141971633 | 141976542 | 14197689  |
| 31 NA18537  | [2515685 chr1  | 1  | 142743633 | 142745273 | 1641   | 3   | 0.533052  | 0.089996 | 142743472 | 142743794 | 142745023 | 14274552  |
| 32 NA18537  | [2515685 chr1  | 1  | 145100273 | 145105440 | 5168   | 16  | 0.303642  | 0.033659 | 145100193 | 145100354 | 145105263 | 14510561  |
| 33 NA18537  | [2515685 chr1  | 1  | 145819541 | 145821079 | 1539   | 2   | 0.792088  | 0.109621 | 145819262 | 145819821 | 145820633 | 14582152  |

|            |               |   |           |           |        |    |           |          |           |           |           |          |
|------------|---------------|---|-----------|-----------|--------|----|-----------|----------|-----------|-----------|-----------|----------|
| 34 NA18537 | [2515685 chr1 | 1 | 145827606 | 145840436 | 12831  | 10 | 0.363959  | 0.047098 | 145827316 | 145827896 | 145840201 | 14584067 |
| 35 NA18537 | [2515685 chr1 | 1 | 145929568 | 145951531 | 21964  | 26 | 0.410975  | 0.028728 | 145929405 | 145929732 | 145951467 | 14595159 |
| 36 NA18537 | [2515685 chr1 | 1 | 146194735 | 146211089 | 16355  | 31 | 0.282612  | 0.026329 | 146193262 | 146196209 | 146210889 | 14621129 |
| 37 NA18537 | [2515685 chr1 | 1 | 148144685 | 148222098 | 77414  | 11 | 0.472873  | 0.016435 | 148142960 | 148146411 | 148220778 | 14822341 |
| 38 NA18537 | [2515685 chr1 | 1 | 148998878 | 149005918 | 7041   | 83 | 0.384042  | 0.036916 | 148998401 | 148999355 | 149004680 | 14900715 |
| 39 NA18537 | [2515685 chr1 | 1 | 149573821 | 149583431 | 9611   | 5  | 0.93061   | 0.075925 | 149573460 | 149574182 | 149582912 | 14958395 |
| 40 NA18537 | [2515685 chr1 | 1 | 171527310 | 171533429 | 6120   | 6  | -0.69621  | 0.063771 | 171526198 | 171528423 | 171533245 | 17153361 |
| 41 NA18537 | [2515685 chr1 | 1 | 193526999 | 193528128 | 1130   | 2  | -0.678546 | 0.116243 | 193526808 | 193527191 | 193527932 | 19352832 |
| 42 NA18537 | [2515685 chr1 | 1 | 204210291 | 204215744 | 5454   | 8  | 0.332948  | 0.051584 | 204210088 | 204210494 | 204215470 | 20421601 |
| 43 NA18537 | [2515685 chr1 | 1 | 209390853 | 209402508 | 11656  | 9  | -0.704908 | 0.053272 | 209390492 | 209391215 | 209401777 | 20940323 |
| 44 NA18537 | [2515685 chr1 | 1 | 218764845 | 218768272 | 3428   | 4  | -0.623012 | 0.075515 | 218764601 | 218765090 | 218767017 | 21876952 |
| 45 NA18537 | [2515685 chr1 | 1 | 236719047 | 236720968 | 1922   | 3  | -0.887497 | 0.090694 | 236718751 | 236719344 | 236720749 | 23672118 |
| 46 NA18537 | [2515685 chr1 | 1 | 239368545 | 239498531 | 129987 | 15 | -0.389086 | 0.038498 | 239368239 | 239368851 | 239496181 | 23950088 |
| 47 NA18537 | [2515685 chr1 | 1 | 244932880 | 244935913 | 3034   | 5  | -0.483861 | 0.069654 | 244932708 | 244933053 | 244935811 | 24493601 |
| 48 NA18537 | [2515685 chr2 | 2 | 6280657   | 6286347   | 5691   | 2  | 0.748915  | 0.111039 | 6279100   | 6282214   | 6284835   | 628785   |
| 49 NA18537 | [2515685 chr2 | 2 | 13670484  | 13672861  | 2378   | 2  | 0.893985  | 0.138794 | 13670292  | 13670676  | 13672526  | 1367319  |
| 50 NA18537 | [2515685 chr2 | 2 | 34606445  | 34641571  | 35127  | 38 | 0.793762  | 0.025786 | 34601818  | 34609397  | 34641330  | 3464181  |
| 51 NA18537 | [2515685 chr2 | 2 | 35896478  | 35905931  | 9454   | 3  | -0.843086 | 0.085381 | 35879425  | 35899430  | 35902979  | 3590982  |
| 52 NA18537 | [2515685 chr2 | 2 | 37869648  | 37911473  | 41826  | 43 | -0.425153 | 0.022438 | 37869077  | 37870220  | 37911214  | 3791173  |
| 53 NA18537 | [2515685 chr2 | 2 | 52661573  | 52696869  | 35297  | 26 | -3.206911 | 0.054504 | 52661218  | 52661928  | 52696416  | 5269732  |
| 54 NA18537 | [2515685 chr2 | 2 | 58735266  | 58736833  | 1568   | 2  | -0.563523 | 0.088094 | 58734865  | 58735667  | 58736407  | 5873725  |
| 55 NA18537 | [2515685 chr2 | 2 | 66416834  | 66420210  | 3377   | 2  | -1.724327 | 0.116742 | 66416385  | 66417284  | 66419065  | 6642135  |
| 56 NA18537 | [2515685 chr2 | 2 | 78544735  | 78546977  | 2243   | 2  | -0.515245 | 0.095821 | 78544410  | 78545061  | 78545542  | 7854841  |
| 57 NA18537 | [2515685 chr2 | 2 | 81751114  | 81752136  | 1023   | 2  | -0.535954 | 0.102886 | 81750837  | 81751392  | 81751912  | 8175236  |
| 58 NA18537 | [2515685 chr2 | 2 | 87473293  | 87478765  | 5473   | 9  | 0.315901  | 0.047077 | 87472060  | 87474526  | 87478435  | 8747909  |
| 59 NA18537 | [2515685 chr2 | 2 | 87488932  | 87497574  | 8643   | 10 | -0.282833 | 0.045114 | 87487289  | 87490576  | 87496929  | 8749822  |
| 60 NA18537 | [2515685 chr2 | 2 | 87981684  | 88098957  | 117274 | 10 | 0.30415   | 0.046334 | 87965922  | 87984636  | 88097049  | 8810086  |
| 61 NA18537 | [2515685 chr2 | 2 | 91337090  | 91347855  | 10766  | 16 | -0.260256 | 0.037071 | 91334271  | 91339909  | 91347601  | 9134811  |
| 62 NA18537 | [2515685 chr2 | 2 | 91383084  | 91393586  | 10503  | 24 | -0.283976 | 0.028806 | 91382981  | 91383187  | 91392231  | 9139494  |
| 63 NA18537 | [2515685 chr2 | 2 | 91541233  | 91596805  | 55573  | 67 | -0.317638 | 0.017751 | 91541071  | 91541396  | 91596409  | 9159720  |
| 64 NA18537 | [2515685 chr2 | 2 | 94950643  | 94955741  | 5099   | 5  | 0.520347  | 0.071132 | 94950345  | 94950941  | 94955271  | 9495621  |
| 65 NA18537 | [2515685 chr2 | 2 | 97184386  | 97189734  | 5349   | 2  | -0.795196 | 0.102129 | 97182781  | 97185992  | 97186782  | 9719672  |
| 66 NA18537 | [2515685 chr2 | 2 | 97613796  | 97614932  | 1137   | 2  | 0.917911  | 0.122278 | 97613553  | 97614040  | 97614467  | 9761539  |
| 67 NA18537 | [2515685 chr2 | 2 | 110157508 | 110161820 | 4313   | 9  | -0.322914 | 0.04905  | 110157208 | 110157809 | 110161721 | 11016191 |
| 68 NA18537 | [2515685 chr2 | 2 | 110516755 | 110520869 | 4115   | 9  | -0.322915 | 0.04905  | 110516656 | 110516854 | 110520751 | 11052098 |
| 69 NA18537 | [2515685 chr2 | 2 | 111696774 | 111699147 | 2374   | 16 | 0.413714  | 0.033902 | 111696413 | 111697136 | 111698899 | 11169939 |
| 70 NA18537 | [2515685 chr2 | 2 | 123193457 | 123198547 | 5091   | 4  | -2.89049  | 0.136558 | 123193121 | 123193793 | 123198337 | 12319875 |
| 71 NA18537 | [2515685 chr2 | 2 | 126159437 | 126168349 | 8913   | 3  | -0.876345 | 0.086109 | 126158494 | 126160381 | 126168048 | 12616865 |
| 72 NA18537 | [2515685 chr2 | 2 | 129315180 | 129318908 | 3729   | 2  | -0.468619 | 0.086872 | 129314923 | 129315438 | 129316040 | 12932177 |
| 73 NA18537 | [2515685 chr2 | 2 | 129354604 | 129360182 | 5579   | 4  | -1.171307 | 0.086232 | 129354317 | 129354892 | 129357659 | 12936270 |
| 74 NA18537 | [2515685 chr2 | 2 | 130410671 | 130425589 | 14919  | 10 | -0.466419 | 0.048607 | 130410236 | 130411106 | 130423487 | 13042769 |
| 75 NA18537 | [2515685 chr2 | 2 | 131684327 | 131685563 | 1237   | 2  | -0.554222 | 0.088826 | 131684045 | 131684610 | 131684966 | 13168616 |
| 76 NA18537 | [2515685 chr2 | 2 | 132846945 | 132869393 | 22449  | 14 | 0.252321  | 0.038808 | 132846760 | 132847131 | 132868979 | 13286980 |
| 77 NA18537 | [2515685 chr2 | 2 | 153495551 | 153499409 | 3859   | 2  | 0.728424  | 0.117184 | 153484545 | 153498503 | 153498846 | 15349997 |
| 78 NA18537 | [2515685 chr2 | 2 | 153622711 | 153625256 | 2546   | 3  | 0.913066  | 0.091335 | 153621175 | 153624247 | 153625088 | 15362542 |
| 79 NA18537 | [2515685 chr2 | 2 | 179342191 | 179354090 | 11900  | 16 | -0.347653 | 0.037618 | 179341856 | 179342527 | 179353696 | 17935448 |
| 80 NA18537 | [2515685 chr2 | 2 | 195804965 | 195809805 | 4841   | 5  | -0.450347 | 0.06793  | 195803577 | 195806354 | 195809355 | 19581025 |
| 81 NA18537 | [2515685 chr2 | 2 | 208176479 | 208184457 | 7979   | 7  | 0.89817   | 0.058394 | 208176093 | 208176865 | 208183930 | 20818498 |
| 82 NA18537 | [2515685 chr2 | 2 | 242664580 | 242668683 | 4104   | 10 | 1.903966  | 0.046556 | 242664284 | 242664877 | 242668532 | 24266883 |
| 83 NA18537 | [2515685 chr3 | 3 | 204650    | 209394    | 4745   | 4  | 0.806873  | 0.076181 | 202918    | 206383    | 209009    | 209775   |
| 84 NA18537 | [2515685 chr3 | 3 | 587432    | 638425    | 50994  | 44 | -0.30521  | 0.022162 | 586921    | 587943    | 638149    | 638701   |
| 85 NA18537 | [2515685 chr3 | 3 | 1757211   | 1765703   | 8493   | 2  | 0.806129  | 0.119394 | 1756096   | 1758327   | 1762058   | 179730   |
| 86 NA18537 | [2515685 chr3 | 3 | 13227589  | 13229260  | 1672   | 2  | -0.624599 | 0.112997 | 13227279  | 13227899  | 13228399  | 1323012  |
| 87 NA18537 | [2515685 chr3 | 3 | 41574298  | 41578539  | 4242   | 2  | -0.888969 | 0.116408 | 41573753  | 41574843  | 41575292  | 4158178  |
| 88 NA18537 | [2515685 chr3 | 3 | 68821474  | 68830847  | 9374   | 17 | -2.241044 | 0.058662 | 68818894  | 68824055  | 68830417  | 6883127  |

|             |               |   |           |           |        |     |           |          |           |           |           |           |
|-------------|---------------|---|-----------|-----------|--------|-----|-----------|----------|-----------|-----------|-----------|-----------|
| 89 NA18537  | [2515685 chr3 | 3 | 75742562  | 75901036  | 158475 | 83  | -0.262401 | 0.015776 | 75740085  | 75745040  | 75900650  | 7590142;  |
| 90 NA18537  | [2515685 chr3 | 3 | 141750174 | 141753455 | 3282   | 5   | -0.408087 | 0.072652 | 141749720 | 141750628 | 141753182 | 14175372; |
| 91 NA18537  | [2515685 chr3 | 3 | 163994592 | 164106273 | 111682 | 106 | 2.278003  | 0.025744 | 163993392 | 163995793 | 164106029 | 16410651  |
| 92 NA18537  | [2515685 chr3 | 3 | 164200660 | 164205886 | 5227   | 5   | -3.339442 | 0.138999 | 164200187 | 164201133 | 164204674 | 16420709  |
| 93 NA18537  | [2515685 chr3 | 3 | 176561952 | 176567506 | 5555   | 5   | -0.899454 | 0.073274 | 176560250 | 176563654 | 176563991 | 17656902  |
| 94 NA18537  | [2515685 chr3 | 3 | 190846156 | 190852181 | 6026   | 4   | -0.954612 | 0.076168 | 190845504 | 190846809 | 190850598 | 19085376  |
| 95 NA18537  | [2515685 chr3 | 3 | 191219813 | 191223326 | 3514   | 4   | -2.148271 | 0.109888 | 191219291 | 191220336 | 191222918 | 19122373  |
| 96 NA18537  | [2515685 chr3 | 3 | 192547659 | 192554331 | 6673   | 9   | 0.894803  | 0.053083 | 192546950 | 192548368 | 192554127 | 19255453  |
| 97 NA18537  | [2515685 chr3 | 3 | 196679304 | 196713768 | 34465  | 36  | 0.519023  | 0.022316 | 196677636 | 196680972 | 196711768 | 19671576  |
| 98 NA18537  | [2515685 chr3 | 3 | 196946678 | 196965802 | 19125  | 15  | -0.512698 | 0.0383   | 196946096 | 196947261 | 196965494 | 19696611  |
| 99 NA18537  | [2515685 chr3 | 3 | 196994475 | 197002965 | 8491   | 10  | 0.85155   | 0.047346 | 196994054 | 196994896 | 197002044 | 19700388  |
| 100 NA18537 | [2515685 chr3 | 3 | 197691083 | 197694225 | 3143   | 4   | -0.863797 | 0.085268 | 197690629 | 197691538 | 197693350 | 19769510  |
| 101 NA18537 | [2515685 chr3 | 3 | 198422794 | 198427408 | 4615   | 2   | 1.016131  | 0.125053 | 198422381 | 198423207 | 198423959 | 19843085  |
| 102 NA18537 | [2515685 chr3 | 3 | 198871725 | 198882515 | 10791  | 14  | -0.254733 | 0.039357 | 198871537 | 198871913 | 198882172 | 19888285  |
| 103 NA18537 | [2515685 chr4 | 4 | 728045    | 731845    | 3801   | 2   | 0.525691  | 0.104575 | 727736    | 728355    | 731532    | 732155    |
| 104 NA18537 | [2515685 chr4 | 4 | 9001573   | 9046719   | 45147  | 86  | 0.547774  | 0.01378  | 9001243   | 9001903   | 9046129   | 904730;   |
| 105 NA18537 | [2515685 chr4 | 4 | 9299471   | 9308037   | 8567   | 6   | -0.484799 | 0.063749 | 9295439   | 9302535   | 9306599   | 9309470   |
| 106 NA18537 | [2515685 chr4 | 4 | 9812346   | 9813108   | 763    | 33  | 0.752331  | 0.023061 | 9812284   | 9812408   | 9812952   | 981326;   |
| 107 NA18537 | [2515685 chr4 | 4 | 9887220   | 9911397   | 24178  | 31  | 1.685684  | 0.039599 | 9886886   | 9887555   | 9910388   | 991240;   |
| 108 NA18537 | [2515685 chr4 | 4 | 34602797  | 34650994  | 48198  | 45  | 0.820909  | 0.024471 | 34601994  | 34603600  | 34649535  | 3465245   |
| 109 NA18537 | [2515685 chr4 | 4 | 40593181  | 40685486  | 92306  | 4   | 0.418922  | 0.076552 | 40590540  | 40595822  | 40682422  | 4077803;  |
| 110 NA18537 | [2515685 chr4 | 4 | 49056481  | 49080998  | 24518  | 41  | -0.296539 | 0.023266 | 49056267  | 49056695  | 49080923  | 4908107;  |
| 111 NA18537 | [2515685 chr4 | 4 | 49400316  | 49405298  | 4983   | 28  | -0.303447 | 0.02677  | 49400246  | 49400386  | 49405298  | 4940529;  |
| 112 NA18537 | [2515685 chr4 | 4 | 52667078  | 52667948  | 871    | 2   | -0.656672 | 0.113648 | 52666901  | 52667255  | 52667713  | 5266818   |
| 113 NA18537 | [2515685 chr4 | 4 | 63500376  | 63504889  | 4514   | 5   | -3.671382 | 0.156085 | 63494261  | 63503440  | 63504639  | 6350514   |
| 114 NA18537 | [2515685 chr4 | 4 | 70206173  | 70423568  | 217396 | 221 | 0.301949  | 0.010197 | 70205193  | 70207154  | 70420504  | 7043341;  |
| 115 NA18537 | [2515685 chr4 | 4 | 115534212 | 115541546 | 7335   | 9   | 0.90324   | 0.05621  | 115530015 | 115537276 | 115539984 | 11554310  |
| 116 NA18537 | [2515685 chr4 | 4 | 116524394 | 116534652 | 10259  | 12  | -0.81569  | 0.045642 | 116523990 | 116524798 | 116534384 | 11653492  |
| 117 NA18537 | [2515685 chr4 | 4 | 133536194 | 133540723 | 4530   | 3   | -0.645436 | 0.097612 | 133531398 | 133539258 | 133540462 | 13354098  |
| 118 NA18537 | [2515685 chr4 | 4 | 138537751 | 138549906 | 12156  | 14  | 0.933623  | 0.046746 | 138537443 | 138538059 | 138547414 | 13855239  |
| 119 NA18537 | [2515685 chr4 | 4 | 142588136 | 142590500 | 2365   | 4   | -0.674647 | 0.079811 | 142587774 | 142588498 | 142590303 | 14259069  |
| 120 NA18537 | [2515685 chr4 | 4 | 145241837 | 145245588 | 3752   | 3   | -0.656333 | 0.099885 | 145241488 | 145242187 | 145245192 | 14524598  |
| 121 NA18537 | [2515685 chr4 | 4 | 153147415 | 153151949 | 4535   | 5   | -0.650389 | 0.068232 | 153146836 | 153147995 | 153151358 | 15315254  |
| 122 NA18537 | [2515685 chr4 | 4 | 155038793 | 155039879 | 1087   | 2   | 0.63209   | 0.110012 | 155038408 | 155039178 | 155039565 | 15504019  |
| 123 NA18537 | [2515685 chr4 | 4 | 169184442 | 169368370 | 183929 | 162 | 0.768911  | 0.012479 | 169184090 | 169184794 | 169366713 | 16937002  |
| 124 NA18537 | [2515685 chr4 | 4 | 172750241 | 172755216 | 4976   | 2   | -3.387763 | 0.281439 | 172748887 | 172751596 | 172753256 | 17275717  |
| 125 NA18537 | [2515685 chr4 | 4 | 173799832 | 173807319 | 7488   | 6   | -2.728943 | 0.125505 | 173799464 | 173800201 | 173804255 | 17381134  |
| 126 NA18537 | [2515685 chr4 | 4 | 185533276 | 185534552 | 1277   | 2   | 0.927151  | 0.126507 | 185532696 | 185533857 | 185534150 | 18553495  |
| 127 NA18537 | [2515685 chr4 | 4 | 185535274 | 185544849 | 9576   | 9   | 1.002986  | 0.053989 | 185534955 | 185535593 | 185543276 | 18554642  |
| 128 NA18537 | [2515685 chr4 | 4 | 186816666 | 186818678 | 2013   | 3   | 4.499497  | 0.218319 | 186816420 | 186816912 | 186818307 | 18681904  |
| 129 NA18537 | [2515685 chr4 | 4 | 187728494 | 187732907 | 4414   | 15  | 1.378382  | 0.045284 | 187728193 | 187728795 | 187732541 | 18773327  |
| 130 NA18537 | [2515685 chr4 | 4 | 188255523 | 188269680 | 14158  | 235 | 1.016571  | 0.009223 | 188255215 | 188255831 | 188269403 | 18826995  |
| 131 NA18537 | [2515685 chr4 | 4 | 189123030 | 189390667 | 267638 | 3   | -0.737965 | 0.091854 | 189020755 | 189126094 | 189387603 | 18943972  |
| 132 NA18537 | [2515685 chr4 | 4 | 189799455 | 189805517 | 6063   | 9   | -0.267528 | 0.048145 | 189799180 | 189799730 | 189805016 | 18980601  |
| 133 NA18537 | [2515685 chr4 | 4 | 190528602 | 190533163 | 4562   | 21  | -0.901288 | 0.035061 | 190528058 | 190529146 | 190531664 | 19053466  |
| 134 NA18537 | [2515685 chr4 | 4 | 191315489 | 191387774 | 72286  | 31  | -0.294799 | 0.024945 | 191175736 | 191318553 | 191384710 | 19139251  |
| 135 NA18537 | [2515685 chr5 | 5 | 104264    | 105617    | 1354   | 2   | 0.714081  | 0.106006 | 104036    | 104493    | 105236    | 105995    |
| 136 NA18537 | [2515685 chr5 | 5 | 520743    | 521684    | 942    | 5   | 0.893217  | 0.076092 | 520428    | 521059    | 521427    | 521942    |
| 137 NA18537 | [2515685 chr5 | 5 | 779034    | 794009    | 14976  | 7   | 0.301786  | 0.054498 | 778799    | 779270    | 793784    | 794235    |
| 138 NA18537 | [2515685 chr5 | 5 | 810517    | 820048    | 9532   | 12  | 0.375015  | 0.044679 | 809997    | 811038    | 819824    | 820272    |
| 139 NA18537 | [2515685 chr5 | 5 | 843378    | 855931    | 12554  | 9   | 0.305628  | 0.049663 | 841706    | 845051    | 855519    | 856343    |
| 140 NA18537 | [2515685 chr5 | 5 | 1075284   | 1079920   | 4637   | 24  | 0.451035  | 0.029128 | 1074709   | 1075859   | 1079566   | 108027;   |
| 141 NA18537 | [2515685 chr5 | 5 | 1122995   | 1126517   | 3523   | 38  | 0.563358  | 0.021385 | 1122772   | 1123219   | 1126389   | 112664    |
| 142 NA18537 | [2515685 chr5 | 5 | 1223248   | 1223930   | 683    | 5   | 1.12116   | 0.067311 | 1223057   | 1223439   | 1223854   | 122400;   |
| 143 NA18537 | [2515685 chr5 | 5 | 1231558   | 1233247   | 1690   | 2   | -0.949346 | 0.102877 | 1231167   | 1231949   | 1232879   | 123361;   |

|             |               |   |           |           |        |     |           |          |           |           |           |          |
|-------------|---------------|---|-----------|-----------|--------|-----|-----------|----------|-----------|-----------|-----------|----------|
| 144 NA18537 | [2515685 chr5 | 5 | 3711017   | 3713468   | 2452   | 3   | -0.877398 | 0.092211 | 3710011   | 3712024   | 3713223   | 3713713  |
| 145 NA18537 | [2515685 chr5 | 5 | 19410747  | 19412172  | 1426   | 3   | 0.721333  | 0.082381 | 19410189  | 19411305  | 19411980  | 19412361 |
| 146 NA18537 | [2515685 chr5 | 5 | 21539354  | 21556393  | 17040  | 34  | 0.273073  | 0.023341 | 21538825  | 21539883  | 21556081  | 21556701 |
| 147 NA18537 | [2515685 chr5 | 5 | 21971730  | 22050956  | 79227  | 122 | 0.256425  | 0.012712 | 21971258  | 21972202  | 22050370  | 22051543 |
| 148 NA18537 | [2515685 chr5 | 5 | 26831997  | 26837938  | 5942   | 6   | 0.714618  | 0.066285 | 26829858  | 26834136  | 26837469  | 26838401 |
| 149 NA18537 | [2515685 chr5 | 5 | 34214373  | 34229603  | 15231  | 40  | -0.270436 | 0.021852 | 34214196  | 34214550  | 34229417  | 34229791 |
| 150 NA18537 | [2515685 chr5 | 5 | 68865200  | 68873710  | 8511   | 16  | 0.397693  | 0.022916 | 68864770  | 68865630  | 68873207  | 68874211 |
| 151 NA18537 | [2515685 chr5 | 5 | 68875552  | 68886836  | 11285  | 24  | 0.397693  | 0.022916 | 68875435  | 68875670  | 68886492  | 68887181 |
| 152 NA18537 | [2515685 chr5 | 5 | 69254509  | 69309060  | 54552  | 108 | 0.27007   | 0.006144 | 69254301  | 69254717  | 69308952  | 69309161 |
| 153 NA18537 | [2515685 chr5 | 5 | 69312166  | 69469180  | 157015 | 217 | 0.27007   | 0.006144 | 69312092  | 69312240  | 69469105  | 69469251 |
| 154 NA18537 | [2515685 chr5 | 5 | 69472287  | 69526776  | 54490  | 114 | 0.27007   | 0.006144 | 69472178  | 69472396  | 69526569  | 69526981 |
| 155 NA18537 | [2515685 chr5 | 5 | 70129558  | 70184131  | 54574  | 95  | 0.267253  | 0.009343 | 70129350  | 70129766  | 70184023  | 70184241 |
| 156 NA18537 | [2515685 chr5 | 5 | 70187238  | 70254947  | 67710  | 92  | 0.267253  | 0.009343 | 70187163  | 70187313  | 70254593  | 70255301 |
| 157 NA18537 | [2515685 chr5 | 5 | 70259320  | 70290648  | 31329  | 29  | 0.503498  | 0.02332  | 70256777  | 70261863  | 70287456  | 70294911 |
| 158 NA18537 | [2515685 chr5 | 5 | 70403953  | 70415506  | 11554  | 22  | 0.421519  | 0.023389 | 70403337  | 70404569  | 70415389  | 70415621 |
| 159 NA18537 | [2515685 chr5 | 5 | 70417349  | 70426554  | 9206   | 16  | 0.421519  | 0.023389 | 70416846  | 70417852  | 70425419  | 70427681 |
| 160 NA18537 | [2515685 chr5 | 5 | 70462208  | 70464475  | 2268   | 6   | 0.412877  | 0.054542 | 70462032  | 70462385  | 70464318  | 70464631 |
| 161 NA18537 | [2515685 chr5 | 5 | 70472601  | 70525910  | 53310  | 100 | 0.289104  | 0.012883 | 70472492  | 70472710  | 70525636  | 70526181 |
| 162 NA18537 | [2515685 chr5 | 5 | 81459213  | 81466055  | 6843   | 2   | -1.388099 | 0.124469 | 81455614  | 81462405  | 81462863  | 81470281 |
| 163 NA18537 | [2515685 chr5 | 5 | 93928460  | 93933101  | 4642   | 4   | -0.487129 | 0.078651 | 93927706  | 93929215  | 93931984  | 93934211 |
| 164 NA18537 | [2515685 chr5 | 5 | 97427204  | 97428353  | 1150   | 2   | 0.926107  | 0.114037 | 97426913  | 97427496  | 97428177  | 97428521 |
| 165 NA18537 | [2515685 chr5 | 5 | 99409393  | 99419037  | 9645   | 13  | -0.698667 | 0.042754 | 99408997  | 99409789  | 99418328  | 99419741 |
| 166 NA18537 | [2515685 chr5 | 5 | 99737846  | 99756720  | 18875  | 39  | -0.267462 | 0.022787 | 99737509  | 99738184  | 99756474  | 99756961 |
| 167 NA18537 | [2515685 chr5 | 5 | 137835848 | 137844134 | 8287   | 7   | 0.557388  | 0.060311 | 137835611 | 137836085 | 137843310 | 13784495 |
| 168 NA18537 | [2515685 chr5 | 5 | 140203081 | 140218928 | 15848  | 20  | 1.920888  | 0.050485 | 140202344 | 140203819 | 140218508 | 14021934 |
| 169 NA18537 | [2515685 chr5 | 5 | 140534849 | 140540106 | 5258   | 5   | 0.46121   | 0.065663 | 140534700 | 140534999 | 140539007 | 14054120 |
| 170 NA18537 | [2515685 chr5 | 5 | 150157909 | 150161837 | 3929   | 6   | -0.782612 | 0.066549 | 150157286 | 150158532 | 150161621 | 15016205 |
| 171 NA18537 | [2515685 chr5 | 5 | 150183322 | 150203801 | 20480  | 11  | -1.74229  | 0.061076 | 150181427 | 150185218 | 150203451 | 15020415 |
| 172 NA18537 | [2515685 chr5 | 5 | 175454835 | 175456556 | 1722   | 4   | -0.38473  | 0.069328 | 175454671 | 175455000 | 175456320 | 17545679 |
| 173 NA18537 | [2515685 chr5 | 5 | 178994494 | 178994971 | 478    | 2   | -0.505525 | 0.094562 | 178994223 | 178994766 | 178994768 | 17899517 |
| 174 NA18537 | [2515685 chr5 | 5 | 179016786 | 179017263 | 478    | 2   | -0.505526 | 0.094562 | 179016582 | 179016990 | 179016992 | 17901753 |
| 175 NA18537 | [2515685 chr5 | 5 | 180754439 | 180755027 | 589    | 2   | -0.804903 | 0.112345 | 180754404 | 180754474 | 180754474 | 18075558 |
| 176 NA18537 | [2515685 chr6 | 6 | 24421     | 25010     | 590    | 2   | -0.804903 | 0.112345 | 23867     | 24975     | 24975     | 25045    |
| 177 NA18537 | [2515685 chr6 | 6 | 201823    | 327656    | 125834 | 129 | -0.418465 | 0.012993 | 201415    | 202232    | 326993    | 328320   |
| 178 NA18537 | [2515685 chr6 | 6 | 26764826  | 26766683  | 1858   | 2   | -0.839058 | 0.114524 | 26764639  | 26765013  | 26766181  | 26767181 |
| 179 NA18537 | [2515685 chr6 | 6 | 26960263  | 26976094  | 15832  | 34  | -0.266895 | 0.024464 | 26959735  | 26960792  | 26975842  | 26976341 |
| 180 NA18537 | [2515685 chr6 | 6 | 29958572  | 30001639  | 43068  | 38  | 0.389859  | 0.021665 | 29957670  | 29959474  | 30001478  | 30001801 |
| 181 NA18537 | [2515685 chr6 | 6 | 30006099  | 30011802  | 5704   | 4   | 0.389859  | 0.021665 | 30005363  | 30006836  | 30011083  | 30012521 |
| 182 NA18537 | [2515685 chr6 | 6 | 30894016  | 30896514  | 2499   | 2   | 0.577206  | 0.101116 | 30893640  | 30894392  | 30895190  | 30897831 |
| 183 NA18537 | [2515685 chr6 | 6 | 31383567  | 31419859  | 36293  | 20  | -0.564515 | 0.034434 | 31383185  | 31383949  | 31418034  | 31421681 |
| 184 NA18537 | [2515685 chr6 | 6 | 32059701  | 32120318  | 60618  | 71  | 0.253877  | 0.015741 | 32059402  | 32060000  | 32120306  | 32120331 |
| 185 NA18537 | [2515685 chr6 | 6 | 32557126  | 32603035  | 45910  | 38  | 0.354777  | 0.011776 | 32556948  | 32557305  | 32601735  | 32604331 |
| 186 NA18537 | [2515685 chr6 | 6 | 32612720  | 32680751  | 68032  | 57  | 0.354777  | 0.011776 | 32611897  | 32613543  | 32680547  | 32680951 |
| 187 NA18537 | [2515685 chr6 | 6 | 32712337  | 32740139  | 27803  | 30  | 0.354777  | 0.011776 | 32712193  | 32712482  | 32739828  | 32740451 |
| 188 NA18537 | [2515685 chr6 | 6 | 32743058  | 32744343  | 1286   | 2   | 0.354777  | 0.011776 | 32742538  | 32743578  | 32744136  | 32744551 |
| 189 NA18537 | [2515685 chr6 | 6 | 32775535  | 32777812  | 2278   | 3   | 0.500597  | 0.091061 | 32775260  | 32775810  | 32777125  | 32778491 |
| 190 NA18537 | [2515685 chr6 | 6 | 35862833  | 35874426  | 11594  | 13  | 0.391743  | 0.040628 | 35862530  | 35863136  | 35873957  | 35874891 |
| 191 NA18537 | [2515685 chr6 | 6 | 62338502  | 62343650  | 5149   | 2   | -0.828135 | 0.112623 | 62334618  | 62342001  | 62342340  | 62344961 |
| 192 NA18537 | [2515685 chr6 | 6 | 66455162  | 66461833  | 6672   | 5   | -0.814915 | 0.07767  | 66454046  | 66456278  | 66461410  | 66462251 |
| 193 NA18537 | [2515685 chr6 | 6 | 74648985  | 74654614  | 5630   | 10  | -0.769136 | 0.049781 | 74648748  | 74649222  | 74653982  | 74655241 |
| 194 NA18537 | [2515685 chr6 | 6 | 77495034  | 77513510  | 18477  | 12  | 0.703867  | 0.046767 | 77493568  | 77496500  | 77510011  | 77517691 |
| 195 NA18537 | [2515685 chr6 | 6 | 79023318  | 79093263  | 69946  | 70  | 0.803428  | 0.018949 | 79022028  | 79024609  | 79091909  | 79094611 |
| 196 NA18537 | [2515685 chr6 | 6 | 83039643  | 83166049  | 126407 | 2   | -0.57953  | 0.09825  | 82896954  | 83043142  | 83162550  | 83301501 |
| 197 NA18537 | [2515685 chr6 | 6 | 102041093 | 102046055 | 4963   | 6   | -0.793152 | 0.067397 | 102040642 | 102041544 | 102045198 | 10204691 |
| 198 NA18537 | [2515685 chr6 | 6 | 115492959 | 115494541 | 1583   | 2   | 1.006851  | 0.127507 | 115492678 | 115493240 | 115494140 | 11549494 |

|             |               |   |           |           |       |    |           |          |           |           |           |           |
|-------------|---------------|---|-----------|-----------|-------|----|-----------|----------|-----------|-----------|-----------|-----------|
| 199 NA18537 | [2515685 chr6 | 6 | 120671191 | 120671916 | 726   | 2  | 1.190349  | 0.118626 | 120670696 | 120671686 | 120671725 | 12067210  |
| 200 NA18537 | [2515685 chr6 | 6 | 144112765 | 144114450 | 1686  | 2  | -0.536036 | 0.106426 | 144112486 | 144113045 | 144114114 | 14411478  |
| 201 NA18537 | [2515685 chr6 | 6 | 160056728 | 160058998 | 2271  | 2  | -0.790356 | 0.094679 | 160055808 | 160057648 | 160058322 | 16005967  |
| 202 NA18537 | [2515685 chr6 | 6 | 160669265 | 160684114 | 14850 | 5  | -0.345341 | 0.06651  | 160669012 | 160669519 | 160683867 | 16068436  |
| 203 NA18537 | [2515685 chr6 | 6 | 160997684 | 161038394 | 40711 | 67 | 0.400243  | 0.015733 | 160997465 | 160997903 | 161038184 | 16103860  |
| 204 NA18537 | [2515685 chr6 | 6 | 161145792 | 161146736 | 945   | 2  | -0.49255  | 0.095096 | 161145603 | 161145982 | 161146411 | 16114706  |
| 205 NA18537 | [2515685 chr6 | 6 | 162704749 | 162713380 | 8632  | 7  | -0.947461 | 0.059607 | 162704136 | 162705363 | 162710796 | 16271596  |
| 206 NA18537 | [2515685 chr6 | 6 | 170603879 | 170604666 | 788   | 2  | -0.912208 | 0.098683 | 170603541 | 170604217 | 170604339 | 17060499  |
| 207 NA18537 | [2515685 chr6 | 6 | 170897081 | 170897669 | 589   | 2  | -0.804903 | 0.112345 | 170897046 | 170897116 | 170897116 | 17089822  |
| 208 NA18537 | [2515685 chr7 | 7 | 928371    | 930663    | 2293  | 6  | -0.373728 | 0.060283 | 928117    | 928626    | 930382    | 930945    |
| 209 NA18537 | [2515685 chr7 | 7 | 3384111   | 3392456   | 8346  | 8  | 0.900079  | 0.058273 | 3383451   | 3384772   | 3390107   | 339561!   |
| 210 NA18537 | [2515685 chr7 | 7 | 14024131  | 14025556  | 1426  | 5  | -0.44533  | 0.069497 | 14023511  | 14024751  | 14025262  | 1402585!  |
| 211 NA18537 | [2515685 chr7 | 7 | 38154080  | 38177664  | 23585 | 27 | -0.300309 | 0.027913 | 38153653  | 38154508  | 38177341  | 3817798!  |
| 212 NA18537 | [2515685 chr7 | 7 | 43775620  | 43789873  | 14254 | 17 | 0.329781  | 0.033301 | 43775434  | 43775807  | 43789550  | 4379019!  |
| 213 NA18537 | [2515685 chr7 | 7 | 56649338  | 56651954  | 2617  | 2  | -0.661257 | 0.11436  | 56649103  | 56649574  | 56651681  | 5665222!  |
| 214 NA18537 | [2515685 chr7 | 7 | 57511485  | 57524163  | 12679 | 14 | -0.279228 | 0.039243 | 57510966  | 57512005  | 57523428  | 5752489!  |
| 215 NA18537 | [2515685 chr7 | 7 | 62254472  | 62255088  | 617   | 4  | 0.524981  | 0.068935 | 62254309  | 62254635  | 62254924  | 6225525!  |
| 216 NA18537 | [2515685 chr7 | 7 | 62302079  | 62302696  | 618   | 4  | 0.524997  | 0.068936 | 62301915  | 62302243  | 62302533  | 6230285!  |
| 217 NA18537 | [2515685 chr7 | 7 | 64028465  | 64046357  | 17893 | 49 | -0.2582   | 0.020478 | 64027806  | 64029125  | 64046143  | 6404657   |
| 218 NA18537 | [2515685 chr7 | 7 | 64463334  | 64481591  | 18258 | 47 | -0.259419 | 0.020796 | 64462999  | 64463669  | 64481417  | 6448176!  |
| 219 NA18537 | [2515685 chr7 | 7 | 64713145  | 64714537  | 1393  | 2  | 0.659291  | 0.107569 | 64712394  | 64713896  | 64714365  | 6471470!  |
| 220 NA18537 | [2515685 chr7 | 7 | 69869623  | 69871056  | 1434  | 2  | 2.6663    | 0.160936 | 69869269  | 69869978  | 69870420  | 6987169!  |
| 221 NA18537 | [2515685 chr7 | 7 | 71858493  | 71859326  | 834   | 2  | -0.751395 | 0.090305 | 71858284  | 71858703  | 71858719  | 7185993!  |
| 222 NA18537 | [2515685 chr7 | 7 | 72014016  | 72014871  | 856   | 3  | 0.497965  | 0.074595 | 72013991  | 72014042  | 72014598  | 7201514   |
| 223 NA18537 | [2515685 chr7 | 7 | 72028825  | 72029840  | 1016  | 3  | -0.464586 | 0.074789 | 72028799  | 72028852  | 72029780  | 7202990!  |
| 224 NA18537 | [2515685 chr7 | 7 | 72156868  | 72157708  | 841   | 2  | -0.751397 | 0.090305 | 72156657  | 72157079  | 72157095  | 7215832   |
| 225 NA18537 | [2515685 chr7 | 7 | 73823778  | 73824682  | 905   | 4  | 0.436064  | 0.069248 | 73823755  | 73823801  | 73824463  | 7382490!  |
| 226 NA18537 | [2515685 chr7 | 7 | 74081890  | 74082904  | 1015  | 3  | -0.464584 | 0.074789 | 74081830  | 74081950  | 74082878  | 7408293   |
| 227 NA18537 | [2515685 chr7 | 7 | 74096901  | 74097754  | 854   | 3  | 0.497965  | 0.074595 | 74096630  | 74097173  | 74097729  | 7409778!  |
| 228 NA18537 | [2515685 chr7 | 7 | 74511185  | 74511943  | 759   | 3  | 0.49797   | 0.074595 | 74511009  | 74511362  | 74511918  | 7451196!  |
| 229 NA18537 | [2515685 chr7 | 7 | 74695370  | 74696139  | 770   | 3  | -0.65363  | 0.077796 | 74695306  | 74695434  | 74695977  | 7469630!  |
| 230 NA18537 | [2515685 chr7 | 7 | 76347035  | 76352770  | 5736  | 7  | -0.330238 | 0.057292 | 76346697  | 76347374  | 76352456  | 7635308!  |
| 231 NA18537 | [2515685 chr7 | 7 | 89455601  | 89456632  | 1032  | 2  | 4.67984   | 0.235243 | 89455373  | 89455830  | 89456225  | 8945703!  |
| 232 NA18537 | [2515685 chr7 | 7 | 92971481  | 92976895  | 5415  | 4  | 0.668679  | 0.084801 | 92971060  | 92971903  | 92975569  | 9297822   |
| 233 NA18537 | [2515685 chr7 | 7 | 99513362  | 99513912  | 551   | 2  | 0.494372  | 0.093882 | 99513133  | 99513592  | 99513623  | 9951420!  |
| 234 NA18537 | [2515685 chr7 | 7 | 101731796 | 101746499 | 14704 | 16 | 0.36148   | 0.033281 | 101731584 | 101732009 | 101745864 | 10174713  |
| 235 NA18537 | [2515685 chr7 | 7 | 101752166 | 101759251 | 7086  | 10 | 0.550542  | 0.040394 | 101751400 | 101752933 | 101759229 | 10175927  |
| 236 NA18537 | [2515685 chr7 | 7 | 101768898 | 101770034 | 1137  | 2  | 0.563496  | 0.086872 | 101768621 | 101769176 | 101769652 | 10177041  |
| 237 NA18537 | [2515685 chr7 | 7 | 101779678 | 101784928 | 5251  | 7  | 0.312777  | 0.05156  | 101778717 | 101780639 | 101784747 | 10178511  |
| 238 NA18537 | [2515685 chr7 | 7 | 101831025 | 101845706 | 14682 | 17 | 0.353018  | 0.032167 | 101830813 | 101831238 | 101845083 | 10184632  |
| 239 NA18537 | [2515685 chr7 | 7 | 101851360 | 101858816 | 7457  | 10 | 0.550541  | 0.040393 | 101850594 | 101852127 | 101858540 | 10185909  |
| 240 NA18537 | [2515685 chr7 | 7 | 101868236 | 101869373 | 1138  | 2  | 0.563496  | 0.086872 | 101867960 | 101868513 | 101868990 | 10186975  |
| 241 NA18537 | [2515685 chr7 | 7 | 101879030 | 101884158 | 5129  | 7  | 0.301199  | 0.051964 | 101878111 | 101879950 | 101883977 | 10188434  |
| 242 NA18537 | [2515685 chr7 | 7 | 109034785 | 109048749 | 13965 | 10 | 2.061507  | 0.069907 | 109024063 | 109037134 | 109046953 | 10905054  |
| 243 NA18537 | [2515685 chr7 | 7 | 109776378 | 109782655 | 6278  | 5  | 0.894406  | 0.077425 | 109775821 | 109776936 | 109782301 | 10978301! |
| 244 NA18537 | [2515685 chr7 | 7 | 125639507 | 125644775 | 5269  | 6  | -0.737595 | 0.074171 | 125639054 | 125639961 | 125644046 | 12564550  |
| 245 NA18537 | [2515685 chr7 | 7 | 133245202 | 133257358 | 12157 | 13 | 2.33369   | 0.070316 | 133244207 | 133246197 | 133255009 | 13326093  |
| 246 NA18537 | [2515685 chr7 | 7 | 141496492 | 141505136 | 8645  | 11 | -0.420585 | 0.043975 | 141495918 | 141497066 | 141504428 | 14150584  |
| 247 NA18537 | [2515685 chr7 | 7 | 141505136 | 141521152 | 16017 | 19 | -1.447354 | 0.048091 | 141504428 | 141505844 | 141520892 | 14152141  |
| 248 NA18537 | [2515685 chr7 | 7 | 141521152 | 141526577 | 5426  | 9  | -0.446798 | 0.047665 | 141520892 | 141521412 | 141526109 | 14152704  |
| 249 NA18537 | [2515685 chr7 | 7 | 141697343 | 141717179 | 19837 | 23 | -0.521194 | 0.032239 | 141696957 | 141697729 | 141716743 | 14171761  |
| 250 NA18537 | [2515685 chr7 | 7 | 141962017 | 141982352 | 20336 | 26 | -0.775334 | 0.031412 | 141961693 | 141962342 | 141981888 | 14198281  |
| 251 NA18537 | [2515685 chr7 | 7 | 141982352 | 141993247 | 10896 | 11 | -0.322865 | 0.042598 | 141981888 | 141982817 | 141992651 | 14199384  |
| 252 NA18537 | [2515685 chr7 | 7 | 143346673 | 143348067 | 1395  | 5  | -0.906215 | 0.065387 | 143346643 | 143346704 | 143347806 | 14334832  |
| 253 NA18537 | [2515685 chr7 | 7 | 143387399 | 143388805 | 1407  | 3  | 0.520076  | 0.089269 | 143387189 | 143387610 | 143388471 | 14338914  |

|             |               |   |           |           |        |     |           |          |           |           |           |           |
|-------------|---------------|---|-----------|-----------|--------|-----|-----------|----------|-----------|-----------|-----------|-----------|
| 254 NA18537 | [2515685 chr7 | 7 | 143472403 | 143473797 | 1395   | 5   | -0.906215 | 0.065387 | 143472142 | 143472664 | 143473766 | 14347382  |
| 255 NA18537 | [2515685 chr7 | 7 | 156939035 | 156942423 | 3389   | 5   | 0.292469  | 0.055896 | 156938932 | 156939138 | 156941474 | 15694337  |
| 256 NA18537 | [2515685 chr7 | 7 | 158617060 | 158624377 | 7318   | 6   | 0.782771  | 0.065757 | 158616763 | 158617357 | 158622028 | 15862672  |
| 257 NA18537 | [2515685 chr8 | 8 | 77165     | 77751     | 587    | 2   | -0.804903 | 0.112345 | 76612     | 77719     | 77719     | 77784     |
| 258 NA18537 | [2515685 chr8 | 8 | 345497    | 346408    | 912    | 2   | 0.686269  | 0.111375 | 345046    | 345949    | 346376    | 346440    |
| 259 NA18537 | [2515685 chr8 | 8 | 1328256   | 1343509   | 15254  | 45  | -0.55837  | 0.020079 | 1327688   | 1328824   | 1342795   | 1344224   |
| 260 NA18537 | [2515685 chr8 | 8 | 2238734   | 2253793   | 15060  | 10  | 0.78361   | 0.050349 | 2233839   | 2241488   | 2251039   | 2257520   |
| 261 NA18537 | [2515685 chr8 | 8 | 3885315   | 3887416   | 2102   | 2   | 0.545246  | 0.105454 | 3885089   | 3885542   | 3886275   | 3888558   |
| 262 NA18537 | [2515685 chr8 | 8 | 4110204   | 4112526   | 2323   | 2   | 3.123099  | 0.215587 | 4109692   | 4110717   | 4112031   | 4113027   |
| 263 NA18537 | [2515685 chr8 | 8 | 5582875   | 5594011   | 11137  | 9   | 0.769166  | 0.049217 | 5582615   | 5583135   | 5592820   | 5595203   |
| 264 NA18537 | [2515685 chr8 | 8 | 6095061   | 6152525   | 57465  | 60  | 0.527473  | 0.019723 | 6094686   | 6095436   | 6151950   | 6153100   |
| 265 NA18537 | [2515685 chr8 | 8 | 6813967   | 6815529   | 1563   | 2   | -0.829661 | 0.103691 | 6813560   | 6814375   | 6815199   | 6815860   |
| 266 NA18537 | [2515685 chr8 | 8 | 7177227   | 7187950   | 10724  | 31  | 0.457814  | 0.026333 | 7177183   | 7177271   | 7187698   | 7188207   |
| 267 NA18537 | [2515685 chr8 | 8 | 7223627   | 7238102   | 14476  | 22  | -0.45178  | 0.031123 | 7223006   | 7224249   | 7237841   | 7238363   |
| 268 NA18537 | [2515685 chr8 | 8 | 7816935   | 7828144   | 11210  | 13  | -0.359516 | 0.039063 | 7816630   | 7817240   | 7827558   | 7828730   |
| 269 NA18537 | [2515685 chr8 | 8 | 7862281   | 7873897   | 11617  | 34  | 0.449034  | 0.024746 | 7862030   | 7862533   | 7873605   | 7874190   |
| 270 NA18537 | [2515685 chr8 | 8 | 12023134  | 12034819  | 11686  | 32  | 0.452127  | 0.026162 | 12022997  | 12023272  | 12034665  | 12034977  |
| 271 NA18537 | [2515685 chr8 | 8 | 12275692  | 12284041  | 8350   | 16  | 0.474161  | 0.036174 | 12275477  | 12275908  | 12283622  | 12284467  |
| 272 NA18537 | [2515685 chr8 | 8 | 16245461  | 16251509  | 6049   | 6   | -0.761523 | 0.066346 | 16245129  | 16245794  | 16250812  | 16252207  |
| 273 NA18537 | [2515685 chr8 | 8 | 20022286  | 20024771  | 2486   | 2   | -1.360606 | 0.127853 | 20021082  | 20023491  | 20024338  | 20025207  |
| 274 NA18537 | [2515685 chr8 | 8 | 39351178  | 39506673  | 155496 | 162 | 0.768689  | 0.012652 | 39350826  | 39351530  | 39505284  | 39508067  |
| 275 NA18537 | [2515685 chr8 | 8 | 58276887  | 58287850  | 10964  | 9   | 0.387782  | 0.044865 | 58276659  | 58277116  | 58287616  | 58288087  |
| 276 NA18537 | [2515685 chr8 | 8 | 72377031  | 72380286  | 3256   | 3   | -0.63615  | 0.082938 | 72376214  | 72377848  | 72379847  | 72380721  |
| 277 NA18537 | [2515685 chr8 | 8 | 85423649  | 85431920  | 8272   | 7   | 0.915871  | 0.059373 | 85423043  | 85424256  | 85431347  | 85432497  |
| 278 NA18537 | [2515685 chr8 | 8 | 86742169  | 86910255  | 168087 | 99  | 0.566989  | 0.013151 | 86741757  | 86742581  | 86910002  | 86910509  |
| 279 NA18537 | [2515685 chr8 | 8 | 115702151 | 115715317 | 13167  | 12  | -0.80223  | 0.046726 | 115701237 | 115703065 | 115712563 | 115718747 |
| 280 NA18537 | [2515685 chr8 | 8 | 120222660 | 120229952 | 7293   | 6   | 0.830241  | 0.061569 | 120218251 | 120225414 | 120229434 | 120230477 |
| 281 NA18537 | [2515685 chr9 | 9 | 19116223  | 19118304  | 2082   | 3   | 0.432468  | 0.082595 | 19115975  | 19116471  | 19117918  | 19118699  |
| 282 NA18537 | [2515685 chr9 | 9 | 28836246  | 28838385  | 2140   | 2   | -0.957158 | 0.103202 | 28835879  | 28836613  | 28837661  | 28839110  |
| 283 NA18537 | [2515685 chr9 | 9 | 33783006  | 33795723  | 12718  | 15  | -0.345052 | 0.038497 | 33782372  | 33783640  | 33794335  | 33797117  |
| 284 NA18537 | [2515685 chr9 | 9 | 39587311  | 39588551  | 1241   | 6   | -0.48756  | 0.057967 | 39587155  | 39587467  | 39588377  | 39588720  |
| 285 NA18537 | [2515685 chr9 | 9 | 39814186  | 39815652  | 1467   | 2   | -0.783559 | 0.09745  | 39814035  | 39814337  | 39814733  | 39816577  |
| 286 NA18537 | [2515685 chr9 | 9 | 39897569  | 40011174  | 113606 | 122 | 0.260004  | 0.012296 | 39897473  | 39897666  | 40011032  | 40011310  |
| 287 NA18537 | [2515685 chr9 | 9 | 40491521  | 40562079  | 70559  | 143 | 0.269817  | 0.011473 | 40491324  | 40491719  | 40561983  | 40562170  |
| 288 NA18537 | [2515685 chr9 | 9 | 40948415  | 40960158  | 11744  | 27  | -0.295153 | 0.026218 | 40948376  | 40948455  | 40959990  | 40960327  |
| 289 NA18537 | [2515685 chr9 | 9 | 41193344  | 41199633  | 6290   | 5   | 0.343473  | 0.067597 | 41193015  | 41193673  | 41199476  | 41199799  |
| 290 NA18537 | [2515685 chr9 | 9 | 41505659  | 41567331  | 61673  | 122 | 0.259228  | 0.012227 | 41505565  | 41505754  | 41567235  | 41567420  |
| 291 NA18537 | [2515685 chr9 | 9 | 41649237  | 41650704  | 1468   | 2   | -0.78356  | 0.09745  | 41648318  | 41650157  | 41650553  | 41650850  |
| 292 NA18537 | [2515685 chr9 | 9 | 41895986  | 41897020  | 1035   | 2   | -0.648947 | 0.094829 | 41895482  | 41896490  | 41896539  | 41897507  |
| 293 NA18537 | [2515685 chr9 | 9 | 42074739  | 42075878  | 1140   | 3   | -0.496328 | 0.076154 | 42074446  | 42075033  | 42075634  | 42076127  |
| 294 NA18537 | [2515685 chr9 | 9 | 42154375  | 42216052  | 61678  | 126 | 0.258773  | 0.012003 | 42154279  | 42154472  | 42215957  | 42216147  |
| 295 NA18537 | [2515685 chr9 | 9 | 42294372  | 42295383  | 1012   | 3   | -0.615647 | 0.075068 | 42294164  | 42294581  | 42295231  | 42295530  |
| 296 NA18537 | [2515685 chr9 | 9 | 42645007  | 42646038  | 1032   | 2   | -0.923375 | 0.086872 | 42644851  | 42645163  | 42645769  | 42646307  |
| 297 NA18537 | [2515685 chr9 | 9 | 42754727  | 42756705  | 1979   | 3   | -0.87257  | 0.076348 | 42754385  | 42755070  | 42755767  | 42757647  |
| 298 NA18537 | [2515685 chr9 | 9 | 42875403  | 42877381  | 1979   | 3   | -0.87257  | 0.076348 | 42875061  | 42875746  | 42876443  | 42878320  |
| 299 NA18537 | [2515685 chr9 | 9 | 43436200  | 43436687  | 488    | 2   | -0.648947 | 0.094829 | 43435899  | 43436502  | 43436551  | 43436827  |
| 300 NA18537 | [2515685 chr9 | 9 | 43513306  | 43514318  | 1013   | 3   | -0.615647 | 0.075068 | 43513098  | 43513515  | 43514166  | 43514470  |
| 301 NA18537 | [2515685 chr9 | 9 | 43626816  | 43749082  | 122267 | 109 | -0.257863 | 0.012204 | 43626293  | 43627340  | 43748824  | 43749347  |
| 302 NA18537 | [2515685 chr9 | 9 | 43868217  | 43869609  | 1393   | 2   | -0.547982 | 0.100502 | 43868064  | 43868371  | 43869410  | 43869800  |
| 303 NA18537 | [2515685 chr9 | 9 | 44153357  | 44153558  | 202    | 2   | -0.659416 | 0.111499 | 44153348  | 44153366  | 44153395  | 44153727  |
| 304 NA18537 | [2515685 chr9 | 9 | 45778237  | 45783515  | 5279   | 4   | -0.349259 | 0.069755 | 45778095  | 45778380  | 45782930  | 45784100  |
| 305 NA18537 | [2515685 chr9 | 9 | 65050952  | 65051963  | 1012   | 3   | -0.615647 | 0.075068 | 65050800  | 65051104  | 65051754  | 65052177  |
| 306 NA18537 | [2515685 chr9 | 9 | 65309543  | 65309744  | 202    | 2   | -0.659419 | 0.111499 | 65309534  | 65309552  | 65309581  | 65309907  |
| 307 NA18537 | [2515685 chr9 | 9 | 66005782  | 66012061  | 6280   | 5   | 0.343473  | 0.067597 | 66005453  | 66006111  | 66011904  | 66012210  |
| 308 NA18537 | [2515685 chr9 | 9 | 66162290  | 66165979  | 3690   | 4   | -0.386245 | 0.069762 | 66162260  | 66162320  | 66165070  | 66166880  |

|             |                |    |           |           |        |     |           |          |           |           |           |           |
|-------------|----------------|----|-----------|-----------|--------|-----|-----------|----------|-----------|-----------|-----------|-----------|
| 309 NA18537 | [2515685 chr9  | 9  | 66230851  | 66231052  | 202    | 2   | -0.659419 | 0.111499 | 66230842  | 66230860  | 66230889  | 6623121!  |
| 310 NA18537 | [2515685 chr9  | 9  | 80878260  | 80879919  | 1660   | 2   | 0.630397  | 0.099561 | 80877780  | 80878740  | 80879539  | 8088029!  |
| 311 NA18537 | [2515685 chr9  | 9  | 84052817  | 84144717  | 91901  | 2   | -0.756991 | 0.108655 | 83978854  | 84055177  | 84142357  | 8424869   |
| 312 NA18537 | [2515685 chr9  | 9  | 89405187  | 89407924  | 2738   | 2   | -0.924752 | 0.112833 | 89404572  | 89405803  | 89407164  | 8940868!  |
| 313 NA18537 | [2515685 chr9  | 9  | 112902065 | 112930027 | 27963  | 39  | 0.503569  | 0.021    | 112901557 | 112902574 | 112929804 | 11293025! |
| 314 NA18537 | [2515685 chr9  | 9  | 135438421 | 135444067 | 5647   | 2   | 2.326494  | 0.144739 | 135383632 | 135440781 | 135443016 | 13544511. |
| 315 NA18537 | [2515685 chr10 | 10 | 5774008   | 5776028   | 2021   | 2   | 0.519758  | 0.091596 | 5773697   | 5774319   | 5775323   | 577673!   |
| 316 NA18537 | [2515685 chr10 | 10 | 6693908   | 6703893   | 9986   | 8   | 0.833519  | 0.056031 | 6692231   | 6695585   | 6703779   | 670400!   |
| 317 NA18537 | [2515685 chr10 | 10 | 20036833  | 20038315  | 1483   | 2   | -0.820112 | 0.116113 | 20036464  | 20037202  | 20038007  | 2003862!  |
| 318 NA18537 | [2515685 chr10 | 10 | 37483833  | 37484967  | 1135   | 2   | 0.509313  | 0.096792 | 37483539  | 37484127  | 37484579  | 3748535!  |
| 319 NA18537 | [2515685 chr10 | 10 | 37487278  | 37489219  | 1942   | 4   | 0.510532  | 0.070557 | 37486985  | 37487572  | 37488997  | 3748944!  |
| 320 NA18537 | [2515685 chr10 | 10 | 37491079  | 37527174  | 36096  | 55  | 0.562171  | 0.01769  | 37490689  | 37491470  | 37526783  | 3752756!  |
| 321 NA18537 | [2515685 chr10 | 10 | 39018739  | 39076570  | 57832  | 81  | -0.323534 | 0.016022 | 39018645  | 39018833  | 39076095  | 3907704!  |
| 322 NA18537 | [2515685 chr10 | 10 | 46130305  | 46132961  | 2657   | 8   | -0.508961 | 0.046951 | 46129754  | 46130857  | 46132792  | 4613313   |
| 323 NA18537 | [2515685 chr10 | 10 | 46252395  | 46255144  | 2750   | 8   | -0.396448 | 0.046642 | 46252240  | 46252551  | 46254847  | 4625544!  |
| 324 NA18537 | [2515685 chr10 | 10 | 46573472  | 46590960  | 17489  | 54  | -0.391199 | 0.018641 | 46573197  | 46573748  | 46590783  | 4659113!  |
| 325 NA18537 | [2515685 chr10 | 10 | 46733199  | 46735286  | 2088   | 4   | -0.485375 | 0.064532 | 46733044  | 46733355  | 46734925  | 4673564!  |
| 326 NA18537 | [2515685 chr10 | 10 | 47054506  | 47174077  | 119572 | 168 | -0.416613 | 0.011455 | 47053719  | 47055294  | 471743907 | 4717424!  |
| 327 NA18537 | [2515685 chr10 | 10 | 47220005  | 47232618  | 12614  | 49  | -0.399573 | 0.019483 | 47219903  | 47220107  | 47232307  | 4723293!  |
| 328 NA18537 | [2515685 chr10 | 10 | 47878214  | 47903146  | 24933  | 67  | -0.359229 | 0.016375 | 47878209  | 47878220  | 47902876  | 4790341!  |
| 329 NA18537 | [2515685 chr10 | 10 | 48516837  | 48520295  | 3459   | 7   | -0.47306  | 0.050807 | 48516285  | 48517390  | 48519325  | 4852126!  |
| 330 NA18537 | [2515685 chr10 | 10 | 48569041  | 48569551  | 511    | 2   | 0.685667  | 0.096172 | 48568656  | 48569426  | 48569482  | 4856962!  |
| 331 NA18537 | [2515685 chr10 | 10 | 48642141  | 48644239  | 2099   | 5   | -0.448313 | 0.057131 | 48641986  | 48642297  | 48643877  | 4864460!  |
| 332 NA18537 | [2515685 chr10 | 10 | 51129602  | 51132551  | 2950   | 6   | -0.50282  | 0.055803 | 51128757  | 51130447  | 51132382  | 5113272!  |
| 333 NA18537 | [2515685 chr10 | 10 | 51157418  | 51161093  | 3676   | 6   | -0.507427 | 0.056404 | 51157207  | 51157629  | 51160825  | 5116136!  |
| 334 NA18537 | [2515685 chr10 | 10 | 55112552  | 55116963  | 4412   | 3   | 0.568759  | 0.092306 | 55112120  | 55112985  | 55116041  | 5511788!  |
| 335 NA18537 | [2515685 chr10 | 10 | 56117212  | 56139275  | 22064  | 20  | -0.911312 | 0.034712 | 56115764  | 56118661  | 56138931  | 5613961!  |
| 336 NA18537 | [2515685 chr10 | 10 | 59387509  | 59389307  | 1799   | 3   | 0.439549  | 0.084413 | 59387256  | 59387762  | 59389096  | 5938951!  |
| 337 NA18537 | [2515685 chr10 | 10 | 63379429  | 63495083  | 115655 | 2   | 0.659749  | 0.110755 | 63326563  | 63382173  | 63492339  | 6367579!  |
| 338 NA18537 | [2515685 chr10 | 10 | 66977355  | 66985193  | 7839   | 8   | -0.810341 | 0.060518 | 66976803  | 66977908  | 66984894  | 6698549!  |
| 339 NA18537 | [2515685 chr10 | 10 | 70951158  | 70960432  | 9275   | 5   | -2.562336 | 0.109364 | 70949290  | 70953027  | 70960215  | 7096065!  |
| 340 NA18537 | [2515685 chr10 | 10 | 82466846  | 82474750  | 7905   | 8   | -0.922188 | 0.058939 | 82466426  | 82467267  | 82472006  | 8247854!  |
| 341 NA18537 | [2515685 chr10 | 10 | 88825014  | 88826359  | 1346   | 2   | -0.579807 | 0.096879 | 88824774  | 88825254  | 88826134  | 8882658!  |
| 342 NA18537 | [2515685 chr10 | 10 | 114102241 | 114106477 | 4237   | 5   | 1.032948  | 0.076096 | 114101694 | 114102788 | 114105867 | 11410708! |
| 343 NA18537 | [2515685 chr10 | 10 | 124336365 | 124341749 | 5385   | 6   | 0.532114  | 0.06395  | 124335581 | 124337149 | 124341238 | 12434226! |
| 344 NA18537 | [2515685 chr10 | 10 | 124348266 | 124366738 | 18473  | 24  | -0.355724 | 0.026349 | 124348238 | 124348295 | 124366300 | 12436717! |
| 345 NA18537 | [2515685 chr10 | 10 | 133620593 | 133623003 | 2411   | 5   | 0.408325  | 0.064617 | 133620379 | 133620807 | 13362658  | 13362334! |
| 346 NA18537 | [2515685 chr10 | 10 | 134924761 | 134926337 | 1577   | 16  | 0.33301   | 0.039675 | 134924706 | 134924816 | 134926184 | 13492649! |
| 347 NA18537 | [2515685 chr11 | 11 | 47046     | 77364     | 30319  | 29  | -0.28522  | 0.026638 | 43965     | 50126     | 77161     | 77567     |
| 348 NA18537 | [2515685 chr11 | 11 | 831591    | 841833    | 10243  | 12  | -0.251858 | 0.044431 | 830951    | 832232    | 841608    | 84205!    |
| 349 NA18537 | [2515685 chr11 | 11 | 969654    | 972693    | 3040   | 3   | 0.515466  | 0.084162 | 969333    | 969976    | 971401    | 97398!    |
| 350 NA18537 | [2515685 chr11 | 11 | 3628748   | 3632795   | 4048   | 6   | -2.411921 | 0.089919 | 3625722   | 3631775   | 3632594   | 363299!   |
| 351 NA18537 | [2515685 chr11 | 11 | 5741269   | 5765993   | 24725  | 33  | 2.066061  | 0.039548 | 5741059   | 5741480   | 5765632   | 576635!   |
| 352 NA18537 | [2515685 chr11 | 11 | 5849480   | 5895282   | 45803  | 47  | 0.564601  | 0.022226 | 5849172   | 5849788   | 5892202   | 590499!   |
| 353 NA18537 | [2515685 chr11 | 11 | 11780222  | 11782174  | 1953   | 2   | -0.750595 | 0.107241 | 11779958  | 11780486  | 11781057  | 1178329!  |
| 354 NA18537 | [2515685 chr11 | 11 | 11831868  | 11833089  | 1222   | 2   | 0.974168  | 0.125897 | 11831412  | 11832324  | 11832853  | 1183332!  |
| 355 NA18537 | [2515685 chr11 | 11 | 18906905  | 18928671  | 21767  | 30  | 0.407758  | 0.027294 | 18906533  | 18907278  | 18928457  | 1892888!  |
| 356 NA18537 | [2515685 chr11 | 11 | 28965605  | 28969186  | 3582   | 5   | 2.802739  | 0.138095 | 28965284  | 28965927  | 28968702  | 2896967!  |
| 357 NA18537 | [2515685 chr11 | 11 | 48284073  | 48284771  | 699    | 2   | 0.930483  | 0.098539 | 48283862  | 48284285  | 48284572  | 4828497!  |
| 358 NA18537 | [2515685 chr11 | 11 | 49042267  | 49048304  | 6038   | 15  | -0.336508 | 0.037683 | 49042139  | 49042396  | 49048149  | 4904846!  |
| 359 NA18537 | [2515685 chr11 | 11 | 49665830  | 49715828  | 49999  | 36  | 0.46243   | 0.025192 | 49665251  | 49666410  | 49712748  | 4972198!  |
| 360 NA18537 | [2515685 chr11 | 11 | 54906516  | 54907879  | 1364   | 2   | -0.494275 | 0.098786 | 54905945  | 54907087  | 54907702  | 5490805!  |
| 361 NA18537 | [2515685 chr11 | 11 | 55124101  | 55212648  | 88548  | 99  | -2.238788 | 0.024642 | 55123742  | 55124460  | 55209568  | 5521575!  |
| 362 NA18537 | [2515685 chr11 | 11 | 58566484  | 58611261  | 44778  | 47  | 0.344969  | 0.021363 | 58566228  | 58566741  | 58610975  | 5861154!  |
| 363 NA18537 | [2515685 chr11 | 11 | 60721034  | 60772727  | 51694  | 69  | 0.456865  | 0.015822 | 60720112  | 60721956  | 60772548  | 6077290!  |

|             |                |    |           |           |        |     |           |          |           |           |           |           |
|-------------|----------------|----|-----------|-----------|--------|-----|-----------|----------|-----------|-----------|-----------|-----------|
| 364 NA18537 | [2515685 chr11 | 11 | 73812690  | 73818580  | 5891   | 4   | -0.423583 | 0.076868 | 73812400  | 73812981  | 73818213  | 73818947  |
| 365 NA18537 | [2515685 chr11 | 11 | 85981700  | 85984113  | 2414   | 3   | -0.650273 | 0.093311 | 85981147  | 85982254  | 85983791  | 85984431  |
| 366 NA18537 | [2515685 chr11 | 11 | 88254238  | 88303948  | 49711  | 44  | 0.25619   | 0.022861 | 88254017  | 88254459  | 88303762  | 88304131  |
| 367 NA18537 | [2515685 chr11 | 11 | 89110903  | 89112381  | 1479   | 2   | -0.647964 | 0.102429 | 89110649  | 89111158  | 89112027  | 89112731  |
| 368 NA18537 | [2515685 chr11 | 11 | 89139592  | 89141786  | 2195   | 3   | -0.566702 | 0.083759 | 89139097  | 89140087  | 89141238  | 89142337  |
| 369 NA18537 | [2515685 chr11 | 11 | 89260124  | 89266247  | 6124   | 10  | -0.829042 | 0.049348 | 89259811  | 89260437  | 89265993  | 89266507  |
| 370 NA18537 | [2515685 chr11 | 11 | 89323920  | 89330042  | 6123   | 12  | -0.834223 | 0.045831 | 89323666  | 89324175  | 89329729  | 89330351  |
| 371 NA18537 | [2515685 chr11 | 11 | 89443831  | 89450293  | 6463   | 8   | -0.361466 | 0.053352 | 89443289  | 89444373  | 89449639  | 89450941  |
| 372 NA18537 | [2515685 chr11 | 11 | 113977904 | 114022346 | 44443  | 50  | 0.251708  | 0.020585 | 113976911 | 113978897 | 114022068 | 11402262  |
| 373 NA18537 | [2515685 chr11 | 11 | 134107699 | 134112290 | 4592   | 5   | 0.738955  | 0.067587 | 134106591 | 134108808 | 134111845 | 13411273  |
| 374 NA18537 | [2515685 chr12 | 12 | 398598    | 404873    | 6276   | 14  | -0.261488 | 0.034265 | 398035    | 399161    | 401600    | 408146    |
| 375 NA18537 | [2515685 chr12 | 12 | 737326    | 744802    | 7477   | 8   | 0.963558  | 0.054395 | 737064    | 737588    | 744211    | 745394    |
| 376 NA18537 | [2515685 chr12 | 12 | 2112534   | 2127044   | 14511  | 15  | 0.607809  | 0.039839 | 2109107   | 2115961   | 2126809   | 2127279   |
| 377 NA18537 | [2515685 chr12 | 12 | 3175419   | 3177521   | 2103   | 2   | -0.833949 | 0.115954 | 3174811   | 3176028   | 3176684   | 3178358   |
| 378 NA18537 | [2515685 chr12 | 12 | 6113530   | 6117052   | 3523   | 3   | 0.554821  | 0.095448 | 6111640   | 6115421   | 6116289   | 6117816   |
| 379 NA18537 | [2515685 chr12 | 12 | 9439936   | 9445623   | 5688   | 9   | 0.326767  | 0.046988 | 9439574   | 9440298   | 9445247   | 9446000   |
| 380 NA18537 | [2515685 chr12 | 12 | 9527659   | 9610804   | 83146  | 91  | 0.719438  | 0.017246 | 9526872   | 9528447   | 9610082   | 9611526   |
| 381 NA18537 | [2515685 chr12 | 12 | 9617501   | 9624971   | 7471   | 7   | 0.444676  | 0.056462 | 9617287   | 9617716   | 9623223   | 9626720   |
| 382 NA18537 | [2515685 chr12 | 12 | 9646423   | 9649697   | 3275   | 4   | 0.374431  | 0.072974 | 9646154   | 9646692   | 9649433   | 9649967   |
| 383 NA18537 | [2515685 chr12 | 12 | 11397201  | 11463223  | 66023  | 67  | -0.288358 | 0.018005 | 11396895  | 11397507  | 11459990  | 1146645   |
| 384 NA18537 | [2515685 chr12 | 12 | 30193719  | 30197709  | 3991   | 2   | -0.529818 | 0.096235 | 30190617  | 30196822  | 30197365  | 30198057  |
| 385 NA18537 | [2515685 chr12 | 12 | 31155331  | 31161854  | 6524   | 7   | 0.316737  | 0.054727 | 31155092  | 31155571  | 31161033  | 31162671  |
| 386 NA18537 | [2515685 chr12 | 12 | 31166636  | 31244780  | 78145  | 74  | 0.426747  | 0.017465 | 31164617  | 31168656  | 31244217  | 31245347  |
| 387 NA18537 | [2515685 chr12 | 12 | 36209452  | 36221304  | 11853  | 12  | -0.293921 | 0.039636 | 36200442  | 36212944  | 36220304  | 36222307  |
| 388 NA18537 | [2515685 chr12 | 12 | 69156920  | 69167888  | 10969  | 11  | 0.75741   | 0.047029 | 69138649  | 69160412  | 69164396  | 69215017  |
| 389 NA18537 | [2515685 chr12 | 12 | 78656134  | 78665261  | 9128   | 9   | -0.483088 | 0.05089  | 78654687  | 78657582  | 78664736  | 78665787  |
| 390 NA18537 | [2515685 chr12 | 12 | 130428781 | 130438310 | 9530   | 13  | 0.410141  | 0.04022  | 130428492 | 130429071 | 130437525 | 13043909  |
| 391 NA18537 | [2515685 chr12 | 12 | 130445662 | 130446755 | 1094   | 2   | 0.705466  | 0.100642 | 130445294 | 130446031 | 130446367 | 13044714  |
| 392 NA18537 | [2515685 chr12 | 12 | 130462377 | 130477472 | 15096  | 16  | 0.411723  | 0.038204 | 130461895 | 130462859 | 130477065 | 130477878 |
| 393 NA18537 | [2515685 chr12 | 12 | 130493699 | 130508710 | 15012  | 22  | 0.422655  | 0.03205  | 130493061 | 130494337 | 130508466 | 130508977 |
| 394 NA18537 | [2515685 chr12 | 12 | 130777013 | 130778340 | 1328   | 2   | -0.481094 | 0.09472  | 130776667 | 130777359 | 130778020 | 13077866  |
| 395 NA18537 | [2515685 chr12 | 12 | 130781181 | 130782379 | 1199   | 2   | 0.618182  | 0.108278 | 130780827 | 130781536 | 130781966 | 13078279  |
| 396 NA18537 | [2515685 chr12 | 12 | 130798727 | 130802870 | 4144   | 5   | 0.454749  | 0.065121 | 130798268 | 130799187 | 130801345 | 13080439  |
| 397 NA18537 | [2515685 chr12 | 12 | 130818451 | 130826244 | 7794   | 5   | 0.461105  | 0.063162 | 130817974 | 130818928 | 130826017 | 13082647  |
| 398 NA18537 | [2515685 chr12 | 12 | 130834495 | 130913585 | 79091  | 105 | 0.444818  | 0.014605 | 130834279 | 130834711 | 130913275 | 13091389  |
| 399 NA18537 | [2515685 chr12 | 12 | 131045346 | 131046250 | 905    | 2   | -0.5838   | 0.103963 | 131044859 | 131045834 | 131046129 | 13104637  |
| 400 NA18537 | [2515685 chr13 | 13 | 25947233  | 25950398  | 3166   | 3   | 0.370548  | 0.146236 | 25946194  | 25948272  | 25949415  | 25951387  |
| 401 NA18537 | [2515685 chr13 | 13 | 31430484  | 31437209  | 6726   | 7   | -0.721039 | 0.062193 | 31430130  | 31430838  | 31436488  | 31437937  |
| 402 NA18537 | [2515685 chr13 | 13 | 33029574  | 33043421  | 13848  | 9   | 0.921213  | 0.055576 | 33000262  | 33034253  | 33042925  | 33043911  |
| 403 NA18537 | [2515685 chr13 | 13 | 33862844  | 33865211  | 2368   | 2   | 0.635951  | 0.115059 | 33862283  | 33863405  | 33864905  | 33865511  |
| 404 NA18537 | [2515685 chr13 | 13 | 36971484  | 36983475  | 11992  | 10  | -0.803291 | 0.051768 | 36969416  | 36973552  | 36982905  | 36984041  |
| 405 NA18537 | [2515685 chr13 | 13 | 69633905  | 69673289  | 39385  | 41  | 0.815587  | 0.024621 | 69633412  | 69634399  | 69672985  | 69673597  |
| 406 NA18537 | [2515685 chr13 | 13 | 108337834 | 108341316 | 3483   | 4   | -0.392127 | 0.075631 | 108337567 | 108338101 | 108340968 | 10834166  |
| 407 NA18537 | [2515685 chr13 | 13 | 109215660 | 109217089 | 1430   | 5   | -0.551485 | 0.056494 | 109215230 | 109216090 | 109216885 | 10921729  |
| 408 NA18537 | [2515685 chr13 | 13 | 110502383 | 110503129 | 747    | 3   | -0.88829  | 0.095656 | 110502225 | 110502541 | 110502890 | 11050336  |
| 409 NA18537 | [2515685 chr13 | 13 | 113079647 | 113086817 | 7171   | 3   | 0.580192  | 0.08784  | 113078890 | 113080404 | 113082138 | 11309434  |
| 410 NA18537 | [2515685 chr14 | 14 | 18527136  | 18542743  | 15608  | 7   | -1.304045 | 0.0618   | 18526373  | 18527899  | 18541619  | 18543867  |
| 411 NA18537 | [2515685 chr14 | 14 | 18659517  | 18670509  | 10993  | 23  | -0.25724  | 0.028656 | 18656819  | 18662216  | 18670023  | 18670997  |
| 412 NA18537 | [2515685 chr14 | 14 | 19195978  | 19197014  | 1037   | 2   | -1.106728 | 0.092541 | 19195970  | 19195986  | 19195633  | 19197491  |
| 413 NA18537 | [2515685 chr14 | 14 | 19254367  | 19494842  | 240476 | 223 | -0.426666 | 0.010009 | 19254200  | 19254535  | 19494444  | 19495247  |
| 414 NA18537 | [2515685 chr14 | 14 | 19619355  | 19625484  | 6130   | 3   | 3.743554  | 0.198834 | 19612261  | 19624114  | 19625018  | 19625951  |
| 415 NA18537 | [2515685 chr14 | 14 | 32022775  | 32026140  | 3366   | 2   | -1.177333 | 0.122484 | 32022274  | 32023276  | 32023749  | 32028537  |
| 416 NA18537 | [2515685 chr14 | 14 | 42059344  | 42062997  | 3654   | 2   | 0.706418  | 0.116    | 42056485  | 42062203  | 42062601  | 42063397  |
| 417 NA18537 | [2515685 chr14 | 14 | 43571343  | 43602213  | 30871  | 26  | -0.823328 | 0.032958 | 43571042  | 43571644  | 43598358  | 43606067  |
| 418 NA18537 | [2515685 chr14 | 14 | 73063171  | 73072157  | 8987   | 8   | 0.314961  | 0.050506 | 73061866  | 73064476  | 73071829  | 73072487  |



|             |                |    |           |           |        |     |           |          |           |           |           |          |
|-------------|----------------|----|-----------|-----------|--------|-----|-----------|----------|-----------|-----------|-----------|----------|
| 419 NA18537 | [2515685 chr14 | 14 | 73075916  | 73117243  | 41328  | 37  | 0.465834  | 0.024899 | 73075495  | 73076337  | 73116211  | 73118271 |
| 420 NA18537 | [2515685 chr14 | 14 | 104766812 | 104778505 | 11694  | 145 | -0.257819 | 0.011384 | 104766457 | 104767167 | 104778286 | 10477872 |
| 421 NA18537 | [2515685 chr15 | 15 | 18690378  | 18773037  | 82660  | 94  | -0.339839 | 0.014706 | 18690036  | 18690720  | 18772364  | 18773710 |
| 422 NA18537 | [2515685 chr15 | 15 | 18840785  | 18850769  | 9985   | 14  | 0.269597  | 0.038248 | 18839417  | 18842153  | 18850013  | 1885152  |
| 423 NA18537 | [2515685 chr15 | 15 | 19798316  | 20090833  | 292518 | 296 | -0.402558 | 0.008638 | 19798190  | 19798443  | 20090578  | 2009108  |
| 424 NA18537 | [2515685 chr15 | 15 | 20229743  | 20234328  | 4586   | 11  | 0.257809  | 0.042568 | 20229703  | 20229783  | 202033781 | 2023487  |
| 425 NA18537 | [2515685 chr15 | 15 | 20475783  | 20477325  | 1543   | 2   | -0.508965 | 0.093469 | 20475140  | 20476426  | 20477073  | 2047757  |
| 426 NA18537 | [2515685 chr15 | 15 | 21606753  | 21614599  | 7847   | 7   | 0.87533   | 0.066752 | 21606459  | 21607047  | 21612298  | 2163669  |
| 427 NA18537 | [2515685 chr15 | 15 | 22223326  | 22225868  | 2543   | 2   | -0.513298 | 0.09599  | 22223191  | 22223462  | 22224115  | 2222762  |
| 428 NA18537 | [2515685 chr15 | 15 | 24986053  | 24992250  | 6198   | 7   | 0.852239  | 0.060534 | 24985426  | 24986680  | 24991680  | 24992820 |
| 429 NA18537 | [2515685 chr15 | 15 | 26331811  | 26345610  | 13800  | 26  | 0.254666  | 0.026708 | 26331265  | 26332358  | 26345348  | 2634587  |
| 430 NA18537 | [2515685 chr15 | 15 | 26892423  | 26895337  | 2915   | 2   | -0.647819 | 0.116006 | 26892183  | 26892664  | 26895138  | 2689553  |
| 431 NA18537 | [2515685 chr15 | 15 | 27198072  | 27202217  | 4146   | 6   | -0.375848 | 0.061639 | 27197623  | 27198522  | 27201948  | 2720248  |
| 432 NA18537 | [2515685 chr15 | 15 | 32515477  | 32592621  | 77145  | 65  | 0.55691   | 0.019538 | 32514954  | 32516000  | 32592260  | 3259298  |
| 433 NA18537 | [2515685 chr15 | 15 | 41675378  | 41678071  | 2694   | 4   | -0.380639 | 0.07173  | 41675148  | 41675609  | 41677665  | 4167847  |
| 434 NA18537 | [2515685 chr15 | 15 | 41775760  | 41777132  | 1373   | 2   | 0.568458  | 0.111551 | 41775441  | 41776080  | 41776863  | 4177740  |
| 435 NA18537 | [2515685 chr15 | 15 | 43106208  | 43111174  | 4967   | 6   | 0.434153  | 0.058495 | 43105919  | 43106498  | 43111071  | 4311127  |
| 436 NA18537 | [2515685 chr15 | 15 | 74671388  | 74682819  | 11432  | 9   | 0.964808  | 0.055292 | 74671122  | 74671654  | 74680518  | 7468951  |
| 437 NA18537 | [2515685 chr15 | 15 | 75117585  | 75119946  | 2362   | 4   | 0.747511  | 0.077679 | 75117343  | 75117827  | 75119741  | 7512015  |
| 438 NA18537 | [2515685 chr15 | 15 | 80588100  | 80588985  | 886    | 2   | -1.188843 | 0.090764 | 80587699  | 80588502  | 80588602  | 8058936  |
| 439 NA18537 | [2515685 chr15 | 15 | 80982676  | 80983561  | 886    | 2   | -1.188882 | 0.090766 | 80982275  | 80983078  | 80983178  | 8098394  |
| 440 NA18537 | [2515685 chr15 | 15 | 83581911  | 83582575  | 665    | 2   | -1.188843 | 0.090764 | 83581731  | 83582092  | 83582192  | 8358295  |
| 441 NA18537 | [2515685 chr15 | 15 | 89781746  | 89785172  | 3427   | 2   | 0.715754  | 0.099831 | 89781413  | 89782079  | 89782871  | 8978862  |
| 442 NA18537 | [2515685 chr15 | 15 | 98234084  | 98240716  | 6633   | 8   | 0.869505  | 0.059414 | 98233842  | 98234327  | 98239350  | 9824208  |
| 443 NA18537 | [2515685 chr15 | 15 | 99159205  | 99162270  | 3066   | 4   | -0.449486 | 0.070517 | 99158805  | 99159605  | 99161761  | 9916277  |
| 444 NA18537 | [2515685 chr15 | 15 | 100109640 | 100122682 | 13043  | 98  | 0.741788  | 0.012603 | 100108905 | 100110376 | 100122315 | 10012305 |
| 445 NA18537 | [2515685 chr16 | 16 | 12550392  | 12553526  | 3135   | 3   | -0.419998 | 0.081061 | 12549915  | 12550869  | 12552957  | 1255409  |
| 446 NA18537 | [2515685 chr16 | 16 | 14693330  | 14707381  | 14052  | 12  | -0.335616 | 0.035465 | 14692801  | 14693859  | 14706351  | 1470841  |
| 447 NA18537 | [2515685 chr16 | 16 | 14732447  | 14746503  | 14057  | 12  | -0.335616 | 0.035465 | 14731918  | 14732976  | 14745473  | 1474753  |
| 448 NA18537 | [2515685 chr16 | 16 | 14896194  | 14908175  | 11982  | 30  | -0.339907 | 0.025556 | 14896075  | 14896314  | 14907917  | 1490843  |
| 449 NA18537 | [2515685 chr16 | 16 | 14910673  | 14916960  | 6288   | 11  | -0.307997 | 0.040364 | 14910391  | 14910955  | 14915993  | 1491792  |
| 450 NA18537 | [2515685 chr16 | 16 | 14955818  | 15030359  | 74542  | 68  | -0.523731 | 0.018272 | 14955356  | 14956281  | 15029969  | 1503075  |
| 451 NA18537 | [2515685 chr16 | 16 | 16294885  | 16306828  | 11944  | 26  | -0.324084 | 0.02713  | 16294729  | 16295041  | 16306570  | 1630708  |
| 452 NA18537 | [2515685 chr16 | 16 | 16633469  | 16639120  | 5652   | 4   | 1.01084   | 0.076675 | 16632502  | 16634437  | 16638386  | 1663985  |
| 453 NA18537 | [2515685 chr16 | 16 | 16703782  | 16704883  | 1102   | 2   | -0.67798  | 0.091661 | 16702971  | 16704593  | 16704736  | 1670503  |
| 454 NA18537 | [2515685 chr16 | 16 | 18408017  | 18419965  | 11949  | 26  | -0.324084 | 0.02713  | 18407760  | 18408275  | 18419809  | 1842012  |
| 455 NA18537 | [2515685 chr16 | 16 | 18574518  | 18575622  | 1105   | 2   | -0.677983 | 0.091661 | 18574371  | 18574665  | 18574808  | 1857643  |
| 456 NA18537 | [2515685 chr16 | 16 | 28283947  | 28324917  | 40971  | 86  | -0.299737 | 0.015727 | 28283717  | 28284178  | 28324665  | 2832516  |
| 457 NA18537 | [2515685 chr16 | 16 | 28324917  | 28333325  | 8409   | 7   | -0.93501  | 0.062399 | 28324665  | 28325169  | 28333269  | 2833338  |
| 458 NA18537 | [2515685 chr16 | 16 | 28617225  | 28630243  | 13019  | 15  | -0.702348 | 0.040797 | 28615757  | 28618694  | 28630124  | 2863036  |
| 459 NA18537 | [2515685 chr16 | 16 | 28630243  | 28668989  | 38747  | 79  | -0.28789  | 0.016321 | 28630124  | 28630362  | 28668758  | 2866922  |
| 460 NA18537 | [2515685 chr16 | 16 | 31869887  | 31872278  | 2392   | 5   | -0.682302 | 0.063811 | 31869805  | 31869970  | 31871108  | 3187344  |
| 461 NA18537 | [2515685 chr16 | 16 | 32150890  | 32368520  | 217631 | 310 | -0.384467 | 0.005882 | 32150057  | 32151724  | 32364027  | 3237039  |
| 462 NA18537 | [2515685 chr16 | 16 | 32402327  | 32616183  | 213857 | 219 | -0.384467 | 0.005882 | 32400448  | 32481337  | 32615350  | 3261701  |
| 463 NA18537 | [2515685 chr16 | 16 | 33091854  | 33194268  | 102415 | 237 | -0.528021 | 0.008778 | 33091021  | 33092688  | 33194099  | 3319443  |
| 464 NA18537 | [2515685 chr16 | 16 | 33201520  | 33232719  | 31200  | 38  | -0.399445 | 0.021504 | 33197841  | 33203399  | 33231518  | 3323392  |
| 465 NA18537 | [2515685 chr16 | 16 | 33254321  | 33335009  | 80689  | 98  | -0.400767 | 0.014629 | 33254120  | 33254522  | 33334563  | 3333545  |
| 466 NA18537 | [2515685 chr16 | 16 | 33456557  | 33480065  | 23509  | 14  | -0.338943 | 0.041261 | 33455814  | 33457301  | 33479777  | 3348035  |
| 467 NA18537 | [2515685 chr16 | 16 | 33502420  | 33530264  | 27845  | 34  | -0.385964 | 0.025588 | 33502141  | 33502700  | 33528385  | 3353346  |
| 468 NA18537 | [2515685 chr16 | 16 | 33674089  | 33677354  | 3266   | 8   | -0.676163 | 0.050841 | 33673445  | 33674733  | 33676941  | 3367776  |
| 469 NA18537 | [2515685 chr16 | 16 | 34321827  | 34609072  | 287246 | 323 | -0.495781 | 0.008361 | 34317185  | 34323706  | 34607193  | 3461732  |
| 470 NA18537 | [2515685 chr16 | 16 | 54353711  | 54363980  | 10270  | 11  | -0.695623 | 0.05027  | 54353419  | 54354004  | 54363701  | 5436425  |
| 471 NA18537 | [2515685 chr16 | 16 | 54365075  | 54369383  | 4309   | 6   | -2.09634  | 0.077983 | 54364721  | 54365430  | 54368899  | 5436986  |
| 472 NA18537 | [2515685 chr16 | 16 | 54370325  | 54380125  | 9801   | 8   | -0.697579 | 0.055235 | 54369868  | 54370782  | 54379862  | 5438038  |
| 473 NA18537 | [2515685 chr16 | 16 | 54399675  | 54422911  | 23237  | 29  | 0.309955  | 0.027949 | 54399445  | 54399906  | 54422635  | 5442318  |

|             |                |    |          |          |        |     |           |          |          |          |          |          |
|-------------|----------------|----|----------|----------|--------|-----|-----------|----------|----------|----------|----------|----------|
| 474 NA18537 | [2515685 chr16 | 16 | 57204541 | 57207585 | 3045   | 3   | 4.545312  | 0.183031 | 57204170 | 57204913 | 57206938 | 5720823: |
| 475 NA18537 | [2515685 chr16 | 16 | 57231525 | 57234603 | 3079   | 2   | -0.527448 | 0.096191 | 57230452 | 57232599 | 57233543 | 5723566: |
| 476 NA18537 | [2515685 chr16 | 16 | 68602449 | 68666721 | 64273  | 59  | -0.399637 | 0.01906  | 68602144 | 68602755 | 68666385 | 6866705: |
| 477 NA18537 | [2515685 chr16 | 16 | 76932229 | 76942282 | 10054  | 8   | 0.670592  | 0.050992 | 76931263 | 76933196 | 76941602 | 7694296: |
| 478 NA18537 | [2515685 chr16 | 16 | 79534564 | 79540634 | 6071   | 8   | -0.721749 | 0.055458 | 79532411 | 79536443 | 79540299 | 7954097: |
| 479 NA18537 | [2515685 chr16 | 16 | 83994929 | 84005017 | 10089  | 82  | -0.263144 | 0.015151 | 83994558 | 83995300 | 84004576 | 8400545: |
| 480 NA18537 | [2515685 chr16 | 16 | 85087756 | 85089036 | 1281   | 2   | 0.55813   | 0.105101 | 85087427 | 85088085 | 85088690 | 8508938: |
| 481 NA18537 | [2515685 chr16 | 16 | 86669849 | 86672366 | 2518   | 2   | -0.77639  | 0.103925 | 86669288 | 86670411 | 86671217 | 8667351: |
| 482 NA18537 | [2515685 chr17 | 17 | 966845   | 969578   | 2734   | 21  | 0.744441  | 0.036345 | 966537   | 967154   | 969378   | 969775:  |
| 483 NA18537 | [2515685 chr17 | 17 | 16657271 | 16665630 | 8360   | 13  | -0.346962 | 0.042893 | 16657056 | 16657486 | 16665353 | 1666590: |
| 484 NA18537 | [2515685 chr17 | 17 | 18296513 | 18311209 | 14697  | 25  | 0.315481  | 0.02944  | 18296246 | 18296781 | 18310937 | 1831148: |
| 485 NA18537 | [2515685 chr17 | 17 | 18331739 | 18332345 | 607    | 2   | -1.295839 | 0.116311 | 18331509 | 18331970 | 18331978 | 1833271: |
| 486 NA18537 | [2515685 chr17 | 17 | 20299935 | 20300531 | 597    | 2   | -1.295866 | 0.116312 | 20299568 | 20300303 | 20300311 | 2030075: |
| 487 NA18537 | [2515685 chr17 | 17 | 20368693 | 20372821 | 4129   | 8   | 0.260599  | 0.05138  | 20367677 | 20369709 | 20372578 | 2037306: |
| 488 NA18537 | [2515685 chr17 | 17 | 21942843 | 21954909 | 12067  | 20  | -0.378426 | 0.032412 | 21942618 | 21943068 | 21954628 | 2195519: |
| 489 NA18537 | [2515685 chr17 | 17 | 22090185 | 22116125 | 25941  | 9   | -0.2568   | 0.048243 | 22080287 | 22092384 | 22115842 | 2211640: |
| 490 NA18537 | [2515685 chr17 | 17 | 31430406 | 31468582 | 38177  | 54  | 0.364866  | 0.006117 | 31429658 | 31431155 | 31468240 | 3146892: |
| 491 NA18537 | [2515685 chr17 | 17 | 31506465 | 31648792 | 142328 | 277 | 0.364866  | 0.006117 | 31506035 | 31506896 | 31648489 | 3164909: |
| 492 NA18537 | [2515685 chr17 | 17 | 31652304 | 31819557 | 167254 | 120 | 0.364866  | 0.006117 | 31652159 | 31652450 | 31819552 | 3181956: |
| 493 NA18537 | [2515685 chr17 | 17 | 32829500 | 32833231 | 3732   | 5   | 0.71839   | 0.073845 | 32828825 | 32830175 | 32832670 | 3283379: |
| 494 NA18537 | [2515685 chr17 | 17 | 33374655 | 33380681 | 6027   | 14  | 0.492631  | 0.036024 | 33374537 | 33374773 | 33380614 | 3338074: |
| 495 NA18537 | [2515685 chr17 | 17 | 33529907 | 33535932 | 6026   | 15  | 0.503376  | 0.034952 | 33529840 | 33529975 | 33535814 | 3353605: |
| 496 NA18537 | [2515685 chr17 | 17 | 33605351 | 33639547 | 34197  | 43  | 0.516714  | 0.022759 | 33605052 | 33605650 | 33638405 | 3364068: |
| 497 NA18537 | [2515685 chr17 | 17 | 33654387 | 33658182 | 3796   | 9   | 0.263848  | 0.048929 | 33653601 | 33655173 | 33658002 | 3365836: |
| 498 NA18537 | [2515685 chr17 | 17 | 36675530 | 36685343 | 9814   | 10  | -0.702972 | 0.050138 | 36675011 | 36676049 | 36684647 | 3668604: |
| 499 NA18537 | [2515685 chr17 | 17 | 40929350 | 40933535 | 4186   | 4   | 0.354164  | 0.064708 | 40928640 | 40930061 | 40933505 | 4093356: |
| 500 NA18537 | [2515685 chr17 | 17 | 40941833 | 41006614 | 64782  | 108 | 0.316985  | 0.013534 | 40941595 | 40942072 | 41006215 | 4100701: |
| 501 NA18537 | [2515685 chr17 | 17 | 41726243 | 41741357 | 15115  | 41  | 0.254886  | 0.021878 | 41725776 | 41726711 | 41740846 | 4174186: |
| 502 NA18537 | [2515685 chr17 | 17 | 41741357 | 41987438 | 246082 | 298 | 0.613664  | 0.006343 | 41740846 | 41741868 | 41987182 | 4198769: |
| 503 NA18537 | [2515685 chr17 | 17 | 41992958 | 42137409 | 144452 | 133 | 0.613664  | 0.006343 | 41992694 | 41993223 | 42135210 | 4214194: |
| 504 NA18537 | [2515685 chr17 | 17 | 42447536 | 42487040 | 39505  | 67  | 0.34941   | 0.017095 | 42447059 | 42448014 | 42486638 | 4248744: |
| 505 NA18537 | [2515685 chr17 | 17 | 42988804 | 43026670 | 37867  | 54  | 0.471039  | 0.020403 | 42988208 | 42989400 | 43025568 | 4302777: |
| 506 NA18537 | [2515685 chr17 | 17 | 54718891 | 54720406 | 1516   | 2   | -0.859495 | 0.118311 | 54718493 | 54719289 | 54719841 | 5472097: |
| 507 NA18537 | [2515685 chr17 | 17 | 57683649 | 57694227 | 10579  | 21  | 0.383325  | 0.030421 | 57683473 | 57683826 | 57693977 | 5769447: |
| 508 NA18537 | [2515685 chr17 | 17 | 60270007 | 60346613 | 76607  | 118 | 0.287791  | 0.013104 | 60269648 | 60270367 | 60345268 | 6034795: |
| 509 NA18537 | [2515685 chr18 | 18 | 9805250  | 9806206  | 957    | 2   | -2.151525 | 0.149201 | 9804637  | 9805863  | 9806038  | 980637:  |
| 510 NA18537 | [2515685 chr18 | 18 | 14172514 | 14178491 | 5978   | 10  | 0.368859  | 0.04625  | 14172152 | 14172877 | 14178149 | 1417883: |
| 511 NA18537 | [2515685 chr18 | 18 | 14726980 | 14736224 | 9245   | 13  | -0.292882 | 0.039929 | 14726667 | 14727294 | 14735973 | 1473647: |
| 512 NA18537 | [2515685 chr18 | 18 | 28142218 | 28143399 | 1182   | 2   | 0.799732  | 0.124113 | 28141854 | 28142583 | 28143055 | 2814374: |
| 513 NA18537 | [2515685 chr18 | 18 | 36514289 | 36521090 | 6802   | 6   | -0.822437 | 0.063998 | 36513759 | 36514820 | 36520512 | 3652166: |
| 514 NA18537 | [2515685 chr18 | 18 | 61917747 | 61920171 | 2425   | 4   | 2.297791  | 0.11939  | 61917522 | 61917973 | 61919646 | 6192069: |
| 515 NA18537 | [2515685 chr18 | 18 | 74231104 | 74234275 | 3172   | 30  | 0.547658  | 0.022744 | 74230952 | 74231256 | 74234139 | 7423441: |
| 516 NA18537 | [2515685 chr18 | 18 | 74373005 | 74376367 | 3363   | 7   | 0.652694  | 0.047754 | 74372064 | 74373947 | 74375833 | 7437690: |
| 517 NA18537 | [2515685 chr18 | 18 | 74392800 | 74398225 | 5426   | 4   | 0.674902  | 0.076964 | 74390826 | 74394774 | 74397790 | 7439866: |
| 518 NA18537 | [2515685 chr19 | 19 | 58103    | 61808    | 3706   | 3   | 0.637285  | 0.082139 | 57927    | 58280    | 61022    | 62595:   |
| 519 NA18537 | [2515685 chr19 | 19 | 79514    | 107994   | 28481  | 31  | -0.268975 | 0.025879 | 79338    | 79690    | 107791   | 108197:  |
| 520 NA18537 | [2515685 chr19 | 19 | 310414   | 312953   | 2540   | 14  | -0.615889 | 0.040571 | 309687   | 311142   | 312913   | 31299:   |
| 521 NA18537 | [2515685 chr19 | 19 | 8708780  | 8760468  | 51689  | 89  | -1.215595 | 0.013783 | 8708296  | 8709264  | 8760209  | 876072:  |
| 522 NA18537 | [2515685 chr19 | 19 | 8760950  | 8763535  | 2586   | 4   | -0.577495 | 0.07217  | 8760727  | 8761174  | 8763160  | 876391:  |
| 523 NA18537 | [2515685 chr19 | 19 | 23007904 | 23013841 | 5938   | 6   | 0.882234  | 0.069232 | 22990964 | 23010431 | 23013525 | 2301415: |
| 524 NA18537 | [2515685 chr19 | 19 | 32542548 | 32932621 | 390074 | 4   | -0.353639 | 0.067247 | 24170302 | 32545075 | 32930094 | 3293796: |
| 525 NA18537 | [2515685 chr19 | 19 | 39419837 | 39421349 | 1513   | 3   | 0.567679  | 0.093238 | 39419616 | 39420059 | 39421018 | 3942168: |
| 526 NA18537 | [2515685 chr19 | 19 | 40489591 | 40496795 | 7205   | 8   | -0.284109 | 0.053574 | 40489030 | 40490153 | 40496555 | 4049703: |
| 527 NA18537 | [2515685 chr19 | 19 | 43974792 | 43977294 | 2503   | 2   | -0.638713 | 0.099916 | 43974369 | 43975216 | 4397620  | 4397896: |
| 528 NA18537 | [2515685 chr19 | 19 | 45412775 | 45413556 | 782    | 2   | -0.711789 | 0.100948 | 45412566 | 45412985 | 45413285 | 4541382: |

|             |                |    |          |          |        |     |           |          |          |          |          |          |
|-------------|----------------|----|----------|----------|--------|-----|-----------|----------|----------|----------|----------|----------|
| 529 NA18537 | [2515685 chr19 | 19 | 46030260 | 46085692 | 55433  | 70  | -0.263653 | 0.017315 | 46029645 | 46030876 | 46085137 | 46086247 |
| 530 NA18537 | [2515685 chr19 | 19 | 48011400 | 48017829 | 6430   | 5   | 0.502015  | 0.063444 | 48011121 | 48011679 | 48016926 | 48018737 |
| 531 NA18537 | [2515685 chr19 | 19 | 48140451 | 48184812 | 44362  | 25  | 0.369418  | 0.029168 | 48139639 | 48141263 | 48184326 | 48185297 |
| 532 NA18537 | [2515685 chr19 | 19 | 48287392 | 48290664 | 3273   | 4   | 0.58849   | 0.079257 | 48287144 | 48287641 | 48289625 | 48291707 |
| 533 NA18537 | [2515685 chr19 | 19 | 48313555 | 48345237 | 31683  | 8   | 0.542051  | 0.050752 | 48307956 | 48316082 | 48345196 | 48345277 |
| 534 NA18537 | [2515685 chr19 | 19 | 53098479 | 53152329 | 53851  | 102 | -0.344673 | 0.012588 | 53098017 | 53098941 | 53152311 | 53152347 |
| 535 NA18537 | [2515685 chr19 | 19 | 55285877 | 55336157 | 50281  | 104 | -0.337451 | 0.012381 | 55285730 | 55286025 | 55335244 | 55337077 |
| 536 NA18537 | [2515685 chr19 | 19 | 56824422 | 56827216 | 2795   | 5   | -0.626513 | 0.066424 | 56824136 | 56824709 | 56826331 | 56828107 |
| 537 NA18537 | [2515685 chr19 | 19 | 56827216 | 56836311 | 9096   | 7   | -3.137733 | 0.095666 | 56826331 | 56828101 | 56834905 | 56837717 |
| 538 NA18537 | [2515685 chr19 | 19 | 56836311 | 56841964 | 5654   | 9   | -0.831182 | 0.050973 | 56834905 | 56837718 | 56841608 | 56842327 |
| 539 NA18537 | [2515685 chr19 | 19 | 58209430 | 58245460 | 36031  | 28  | -0.704741 | 0.028616 | 58208997 | 58209863 | 58245024 | 58245897 |
| 540 NA18537 | [2515685 chr19 | 19 | 59247755 | 59252061 | 4307   | 5   | 0.8388    | 0.073201 | 59246427 | 59249084 | 59251854 | 59252267 |
| 541 NA18537 | [2515685 chr19 | 19 | 59465762 | 59471589 | 5828   | 7   | -0.338067 | 0.056609 | 59465127 | 59466398 | 59471399 | 59471787 |
| 542 NA18537 | [2515685 chr19 | 19 | 59585553 | 59589354 | 3802   | 2   | -0.704897 | 0.131332 | 59584932 | 59586174 | 59587033 | 59591677 |
| 543 NA18537 | [2515685 chr19 | 19 | 59840010 | 59870155 | 30146  | 26  | -0.59758  | 0.029778 | 59839753 | 59840268 | 59869416 | 59870897 |
| 544 NA18537 | [2515685 chr19 | 19 | 59989312 | 60026704 | 37393  | 41  | -0.433958 | 0.023884 | 59988943 | 59989681 | 60025232 | 60028177 |
| 545 NA18537 | [2515685 chr19 | 19 | 60039807 | 60044873 | 5067   | 6   | -0.430385 | 0.055198 | 60039278 | 60040336 | 60043738 | 60046007 |
| 546 NA18537 | [2515685 chr19 | 19 | 60958920 | 60976029 | 17110  | 15  | -0.796475 | 0.040298 | 60957933 | 60959907 | 60975748 | 60976317 |
| 547 NA18537 | [2515685 chr20 | 20 | 1500976  | 1511097  | 10122  | 11  | -0.35132  | 0.041117 | 1500749  | 1501203  | 1510534  | 15116607 |
| 548 NA18537 | [2515685 chr20 | 20 | 1511097  | 1532477  | 21381  | 26  | -2.062777 | 0.04376  | 1510534  | 1511660  | 1532182  | 15327777 |
| 549 NA18537 | [2515685 chr20 | 20 | 1533078  | 1544060  | 10983  | 16  | -0.387722 | 0.034139 | 1532773  | 1533384  | 1543588  | 15445337 |
| 550 NA18537 | [2515685 chr20 | 20 | 2153768  | 2313165  | 159398 | 175 | -0.421897 | 0.011208 | 2153045  | 2154491  | 2312360  | 23139777 |
| 551 NA18537 | [2515685 chr20 | 20 | 11768637 | 11771682 | 3046   | 2   | 0.680889  | 0.111353 | 11768348 | 11768927 | 11770174 | 11773197 |
| 552 NA18537 | [2515685 chr20 | 20 | 15249645 | 15251805 | 2161   | 2   | -0.891953 | 0.103223 | 15249381 | 15249909 | 15251287 | 15252327 |
| 553 NA18537 | [2515685 chr20 | 20 | 23904400 | 23982753 | 78354  | 10  | -0.349579 | 0.043153 | 23887613 | 23907810 | 23979343 | 24071247 |
| 554 NA18537 | [2515685 chr20 | 20 | 25714111 | 25742825 | 28715  | 37  | -0.340097 | 0.023921 | 25713986 | 25714237 | 25742824 | 25742827 |
| 555 NA18537 | [2515685 chr20 | 20 | 25764291 | 25774048 | 9758   | 18  | -0.388032 | 0.03453  | 25764096 | 25764487 | 25773787 | 25774317 |
| 556 NA18537 | [2515685 chr20 | 20 | 25940035 | 25948886 | 8852   | 16  | -0.3671   | 0.036348 | 25939983 | 25940088 | 25948691 | 25949087 |
| 557 NA18537 | [2515685 chr20 | 20 | 25970351 | 25999063 | 28713  | 37  | -0.340097 | 0.023921 | 25970350 | 25970352 | 25989938 | 25999187 |
| 558 NA18537 | [2515685 chr20 | 20 | 59951513 | 59957050 | 5538   | 18  | 0.759478  | 0.034761 | 59950681 | 59952345 | 59956538 | 59957567 |
| 559 NA18537 | [2515685 chr20 | 20 | 62066380 | 62068214 | 1835   | 8   | 1.494784  | 0.061898 | 62066146 | 62066615 | 62067671 | 62068757 |
| 560 NA18537 | [2515685 chr21 | 21 | 29171583 | 29178866 | 7284   | 10  | 0.269247  | 0.047227 | 29170934 | 29172232 | 29178652 | 29179087 |
| 561 NA18537 | [2515685 chr22 | 22 | 14480514 | 14488322 | 7809   | 12  | -0.326646 | 0.040844 | 14480270 | 14480758 | 14488289 | 14488357 |
| 562 NA18537 | [2515685 chr22 | 22 | 14768390 | 14769425 | 1036   | 2   | -1.106728 | 0.092541 | 14768382 | 14768398 | 14768944 | 14769907 |
| 563 NA18537 | [2515685 chr22 | 22 | 15272638 | 15388376 | 115739 | 119 | -0.274764 | 0.013046 | 15270179 | 15275097 | 15388154 | 15388597 |
| 564 NA18537 | [2515685 chr22 | 22 | 17032140 | 17256406 | 224267 | 359 | -0.36067  | 0.003106 | 17031480 | 17032801 | 17252078 | 17259087 |
| 565 NA18537 | [2515685 chr22 | 22 | 18686043 | 19041529 | 355487 | 350 | -0.36067  | 0.003106 | 18685780 | 18686307 | 19040908 | 19042157 |
| 566 NA18537 | [2515685 chr22 | 22 | 19349564 | 19447242 | 97679  | 23  | -0.36067  | 0.003106 | 19346886 | 19366770 | 19416806 | 19449927 |
| 567 NA18537 | [2515685 chr22 | 22 | 19789638 | 20121795 | 332158 | 513 | -0.36067  | 0.003106 | 19788642 | 19790634 | 20121548 | 20122047 |
| 568 NA18537 | [2515685 chr22 | 22 | 20137248 | 20243639 | 106392 | 148 | -0.36067  | 0.003106 | 20136561 | 20137935 | 20240961 | 20302287 |
| 569 NA18537 | [2515685 chr22 | 22 | 21977418 | 22142561 | 165144 | 15  | -0.367368 | 0.03645  | 21977164 | 21977673 | 22139883 | 22147507 |
| 570 NA18537 | [2515685 chr22 | 22 | 22600453 | 22635796 | 35344  | 53  | -0.46393  | 0.014552 | 22598667 | 22602240 | 22635364 | 22636227 |
| 571 NA18537 | [2515685 chr22 | 22 | 22639133 | 22666516 | 27384  | 48  | -0.46393  | 0.014552 | 22638819 | 22639448 | 22666496 | 22666537 |
| 572 NA18537 | [2515685 chr22 | 22 | 22672624 | 22674936 | 2313   | 4   | 1.151204  | 0.094389 | 22672391 | 22672858 | 22674426 | 22675447 |
| 573 NA18537 | [2515685 chr22 | 22 | 22678229 | 22683930 | 5702   | 2   | 0.596943  | 0.108288 | 22678110 | 22678349 | 22681309 | 22686557 |
| 574 NA18537 | [2515685 chr22 | 22 | 22683930 | 22688523 | 4594   | 3   | -0.723147 | 0.093147 | 22681309 | 22686552 | 22687378 | 22689667 |
| 575 NA18537 | [2515685 chr22 | 22 | 22690382 | 22691501 | 1120   | 2   | 1.619996  | 0.116912 | 22690146 | 22690619 | 22691088 | 22691917 |
| 576 NA18537 | [2515685 chr22 | 22 | 22695407 | 22715094 | 19688  | 24  | 0.867318  | 0.037337 | 22695112 | 22695703 | 22714777 | 22715417 |
| 577 NA18537 | [2515685 chr22 | 22 | 22960930 | 22986040 | 25111  | 34  | -0.31324  | 0.024273 | 22957880 | 22963608 | 22985733 | 22986347 |
| 578 NA18537 | [2515685 chr22 | 22 | 22995064 | 22998522 | 3459   | 9   | -0.362871 | 0.051287 | 22994927 | 22995201 | 22997635 | 22999407 |
| 579 NA18537 | [2515685 chr22 | 22 | 23327418 | 23381903 | 54486  | 42  | -0.274249 | 0.02169  | 23325274 | 23329563 | 23381037 | 23382777 |
| 580 NA18537 | [2515685 chr22 | 22 | 27394530 | 27418963 | 24434  | 7   | -0.306724 | 0.051546 | 27354515 | 27397208 | 27416285 | 27432507 |
| 581 NA18537 | [2515685 chr22 | 22 | 33619409 | 33622591 | 3183   | 4   | 0.912974  | 0.075827 | 33618939 | 33619879 | 33622541 | 33622647 |
| 582 NA18537 | [2515685 chr22 | 22 | 37683358 | 37711759 | 28402  | 27  | -1.510613 | 0.03645  | 37683063 | 37683653 | 37711022 | 37712497 |
| 583 NA18537 | [2515685 chr22 | 22 | 37711759 | 37715619 | 3861   | 4   | -0.408911 | 0.078586 | 37711022 | 37712497 | 37714807 | 37716437 |

|             |                |    |           |           |        |     |           |          |           |           |           |          |
|-------------|----------------|----|-----------|-----------|--------|-----|-----------|----------|-----------|-----------|-----------|----------|
| 584 NA18537 | [2515685 chr22 | 22 | 41208662  | 41279753  | 71092  | 61  | -0.482903 | 0.018356 | 41207835  | 41209490  | 41278713  | 4128079- |
| 585 NA18537 | [2515685 chr22 | 22 | 41287018  | 41304134  | 17117  | 20  | -0.275497 | 0.030879 | 41286777  | 41287259  | 41302665  | 4130560: |
| 586 NA18537 | [2515685 chr22 | 22 | 43455661  | 43456925  | 1265   | 2   | -3.66654  | 0.231278 | 43455369  | 43455954  | 43456505  | 4345734! |
| 587 NA18537 | [2515685 chr22 | 22 | 44150680  | 44156545  | 5866   | 3   | -0.455859 | 0.077633 | 44150466  | 44150895  | 44155221  | 4415787! |
| 1 NA18552   | [2515685 chr1  | 1  | 34112     | 76985     | 42874  | 52  | 0.254808  | 0.027341 | 32536     | 35688     | 76641     | 77329    |
| 2 NA18552   | [2515685 chr1  | 1  | 601044    | 612159    | 11116  | 7   | -1.075839 | 0.074518 | 587801    | 604315    | 610122    | 614196   |
| 3 NA18552   | [2515685 chr1  | 1  | 1653053   | 1716937   | 63885  | 84  | -0.346298 | 0.021592 | 1652846   | 1653260   | 1716637   | 171723!  |
| 4 NA18552   | [2515685 chr1  | 1  | 1853012   | 1854645   | 1634   | 2   | 1.467209  | 0.13941  | 1852616   | 1853409   | 1853816   | 185547-  |
| 5 NA18552   | [2515685 chr1  | 1  | 10416438  | 10418311  | 1874   | 2   | -0.808704 | 0.13941  | 10415863  | 10417014  | 10417712  | 1041891  |
| 6 NA18552   | [2515685 chr1  | 1  | 12785372  | 12791317  | 5946   | 13  | 0.35515   | 0.054681 | 12785195  | 12785549  | 12790929  | 1279170! |
| 7 NA18552   | [2515685 chr1  | 1  | 12832563  | 12870303  | 37741  | 46  | 0.3589    | 0.029069 | 12832250  | 12832877  | 12870291  | 1287031! |
| 8 NA18552   | [2515685 chr1  | 1  | 12874938  | 12888178  | 13241  | 35  | 0.28365   | 0.033325 | 12874781  | 12875096  | 12887924  | 1288843! |
| 9 NA18552   | [2515685 chr1  | 1  | 13159940  | 13162706  | 2767   | 4   | 0.572189  | 0.098578 | 13159618  | 13160263  | 13162366  | 1316304! |
| 10 NA18552  | [2515685 chr1  | 1  | 13192199  | 13198410  | 6212   | 12  | 0.380891  | 0.056914 | 13192020  | 13192378  | 13198244  | 1319857! |
| 11 NA18552  | [2515685 chr1  | 1  | 13380737  | 13383503  | 2767   | 4   | 0.572189  | 0.098578 | 13380415  | 13381060  | 13383163  | 1338384- |
| 12 NA18552  | [2515685 chr1  | 1  | 13413054  | 13419265  | 6212   | 12  | 0.380891  | 0.056914 | 13412875  | 13413233  | 13419099  | 1341943! |
| 13 NA18552  | [2515685 chr1  | 1  | 16546501  | 16577498  | 30998  | 29  | -0.446826 | 0.036611 | 16545973  | 16547030  | 16577091  | 1657790! |
| 14 NA18552  | [2515685 chr1  | 1  | 16751919  | 16797596  | 45678  | 56  | -0.260579 | 0.026346 | 16751697  | 16752141  | 16779325  | 1679786! |
| 15 NA18552  | [2515685 chr1  | 1  | 16951776  | 16960152  | 8377   | 7   | -0.553784 | 0.074518 | 16951540  | 16952012  | 16959445  | 1696085! |
| 16 NA18552  | [2515685 chr1  | 1  | 16975906  | 17005532  | 29627  | 33  | -0.632331 | 0.034827 | 16975406  | 16976406  | 17004616  | 1700644! |
| 17 NA18552  | [2515685 chr1  | 1  | 31745595  | 31757825  | 12231  | 15  | -0.303498 | 0.050905 | 31744036  | 31747155  | 31757576  | 3175807! |
| 18 NA18552  | [2515685 chr1  | 1  | 34774023  | 34780982  | 6960   | 13  | -0.847552 | 0.056697 | 34773595  | 34774451  | 34780581  | 3478138: |
| 19 NA18552  | [2515685 chr1  | 1  | 72478372  | 72524180  | 45809  | 36  | -1.985527 | 0.044682 | 72478140  | 72478604  | 72523661  | 7252470! |
| 20 NA18552  | [2515685 chr1  | 1  | 89188689  | 89190762  | 2074   | 3   | 1.966047  | 0.134955 | 89188470  | 89188908  | 89190458  | 8919106! |
| 21 NA18552  | [2515685 chr1  | 1  | 103854270 | 103934476 | 80207  | 128 | -0.304804 | 0.012297 | 103853964 | 103854577 | 103934188 | 10393476 |
| 22 NA18552  | [2515685 chr1  | 1  | 103939709 | 104015739 | 76031  | 123 | -0.304804 | 0.012297 | 103937206 | 103942212 | 104013178 | 10401830 |
| 23 NA18552  | [2515685 chr1  | 1  | 105728161 | 105735462 | 7302   | 8   | -0.863123 | 0.073057 | 105727820 | 105728503 | 105734532 | 10573639 |
| 24 NA18552  | [2515685 chr1  | 1  | 109936541 | 109965726 | 29186  | 31  | 0.285149  | 0.035844 | 109935803 | 109937279 | 109965065 | 10996638 |
| 25 NA18552  | [2515685 chr1  | 1  | 111459182 | 111498600 | 39419  | 13  | 0.28548   | 0.054862 | 111380891 | 111462453 | 111498106 | 11149909 |
| 26 NA18552  | [2515685 chr1  | 1  | 120525058 | 120525798 | 741    | 10  | 0.460057  | 0.062346 | 120524971 | 120525146 | 120525705 | 12052589 |
| 27 NA18552  | [2515685 chr1  | 1  | 120529720 | 120532682 | 2963   | 12  | 0.398906  | 0.056914 | 120529710 | 120529731 | 120532099 | 12053326 |
| 28 NA18552  | [2515685 chr1  | 1  | 120628893 | 120634303 | 5411   | 9   | 0.421862  | 0.065719 | 120628510 | 120629277 | 120634104 | 12063450 |
| 29 NA18552  | [2515685 chr1  | 1  | 141384805 | 141390451 | 5647   | 12  | 0.398787  | 0.056914 | 120962965 | 141388076 | 141390441 | 14139046 |
| 30 NA18552  | [2515685 chr1  | 1  | 141394373 | 141395073 | 701    | 13  | 0.418339  | 0.054681 | 141394280 | 141394467 | 141395026 | 14139512 |
| 31 NA18552  | [2515685 chr1  | 1  | 142743633 | 142745273 | 1641   | 3   | 0.706446  | 0.113828 | 142743472 | 142743794 | 142745023 | 14274552 |
| 32 NA18552  | [2515685 chr1  | 1  | 145930102 | 145934946 | 4845   | 5   | 0.552382  | 0.088171 | 145929732 | 145930472 | 145934610 | 14593528 |
| 33 NA18552  | [2515685 chr1  | 1  | 146203184 | 146210284 | 7101   | 15  | 0.381183  | 0.051317 | 146202760 | 146203609 | 146210052 | 14621051 |
| 34 NA18552  | [2515685 chr1  | 1  | 146462721 | 146473587 | 10867  | 6   | 0.434999  | 0.080488 | 146462499 | 146462943 | 146473412 | 14647376 |
| 35 NA18552  | [2515685 chr1  | 1  | 146564052 | 146566576 | 2525   | 5   | 0.583639  | 0.088171 | 146563711 | 146564394 | 146566510 | 14656664 |
| 36 NA18552  | [2515685 chr1  | 1  | 148998878 | 149005918 | 7041   | 13  | 0.690506  | 0.054681 | 148998401 | 148999355 | 149004680 | 14900715 |
| 37 NA18552  | [2515685 chr1  | 1  | 149368571 | 149385742 | 17172  | 3   | -0.620978 | 0.113828 | 149368105 | 149369038 | 149385339 | 14938614 |
| 38 NA18552  | [2515685 chr1  | 1  | 149385742 | 149399435 | 13694  | 19  | -1.814497 | 0.0546   | 149385339 | 149386145 | 149399080 | 14939979 |
| 39 NA18552  | [2515685 chr1  | 1  | 149573821 | 149583431 | 9611   | 5   | 0.837056  | 0.088954 | 149573460 | 149574182 | 149582912 | 14958395 |
| 40 NA18552  | [2515685 chr1  | 1  | 158225480 | 158264535 | 39056  | 47  | -0.368185 | 0.028758 | 158225276 | 158225685 | 158264300 | 15826477 |
| 41 NA18552  | [2515685 chr1  | 1  | 158372273 | 158374264 | 1992   | 3   | -0.68282  | 0.113828 | 158372059 | 158372488 | 158373972 | 15837455 |
| 42 NA18552  | [2515685 chr1  | 1  | 186057433 | 186276059 | 218627 | 217 | -0.691868 | 0.01387  | 186057175 | 186057691 | 186275512 | 18627660 |
| 43 NA18552  | [2515685 chr1  | 1  | 218773112 | 218778100 | 4989   | 7   | -0.380793 | 0.074518 | 218772732 | 218773492 | 218777921 | 21877828 |
| 44 NA18552  | [2515685 chr1  | 1  | 236719047 | 236720968 | 1922   | 3   | -0.859333 | 0.113828 | 236718751 | 236719344 | 236720749 | 23672118 |
| 45 NA18552  | [2515685 chr1  | 1  | 239368545 | 239513430 | 144886 | 21  | -0.316236 | 0.043023 | 239368239 | 239368851 | 239512397 | 23951446 |
| 46 NA18552  | [2515685 chr1  | 1  | 243009520 | 243011368 | 1849   | 3   | -0.747976 | 0.113828 | 243008430 | 243010610 | 243011204 | 24301153 |
| 47 NA18552  | [2515685 chr2  | 2  | 34606446  | 34641571  | 35126  | 37  | 0.741071  | 0.032618 | 34601818  | 34609397  | 34641330  | 3464181; |
| 48 NA18552  | [2515685 chr2  | 2  | 35896479  | 35905930  | 9452   | 3   | -0.861929 | 0.113828 | 35879425  | 35899430  | 35902979  | 3590982  |
| 49 NA18552  | [2515685 chr2  | 2  | 36245925  | 36253907  | 7983   | 4   | -0.775141 | 0.098578 | 36243469  | 36248382  | 36250956  | 3625755! |
| 50 NA18552  | [2515685 chr2  | 2  | 44378695  | 44380701  | 2007   | 3   | -2.613116 | 0.129974 | 44378636  | 44378754  | 44379703  | 4438169! |
| 51 NA18552  | [2515685 chr2  | 2  | 51685351  | 51700089  | 14739  | 17  | 0.28045   | 0.047817 | 51684868  | 51685834  | 51699867  | 5170031  |

|             |               |   |           |           |        |     |           |          |           |           |           |          |
|-------------|---------------|---|-----------|-----------|--------|-----|-----------|----------|-----------|-----------|-----------|----------|
| 52 NA18552  | [2515685 chr2 | 2 | 52661573  | 52696869  | 35297  | 26  | -0.826331 | 0.038818 | 52661218  | 52661928  | 52696416  | 5269732: |
| 53 NA18552  | [2515685 chr2 | 2 | 55784679  | 55794996  | 10318  | 9   | 0.389139  | 0.06815  | 55784376  | 55784983  | 55794590  | 5579540: |
| 54 NA18552  | [2515685 chr2 | 2 | 59577766  | 59585803  | 8038   | 8   | 0.371535  | 0.069705 | 59577195  | 59578337  | 59585575  | 5958603: |
| 55 NA18552  | [2515685 chr2 | 2 | 61675589  | 61676777  | 1189   | 2   | 1.664108  | 0.13975  | 61675200  | 61675979  | 61676468  | 6167708: |
| 56 NA18552  | [2515685 chr2 | 2 | 67235911  | 67240574  | 4664   | 5   | -0.576345 | 0.088171 | 67235223  | 67236600  | 67240226  | 6724092: |
| 57 NA18552  | [2515685 chr2 | 2 | 82940858  | 82951598  | 10741  | 8   | 0.349636  | 0.069705 | 82940573  | 82941143  | 82951394  | 8295180: |
| 58 NA18552  | [2515685 chr2 | 2 | 87170638  | 87191453  | 20816  | 34  | 0.259431  | 0.033812 | 87170401  | 87170876  | 87191208  | 8719169: |
| 59 NA18552  | [2515685 chr2 | 2 | 87272521  | 87315426  | 42906  | 58  | 0.343756  | 0.025888 | 87270821  | 87274221  | 87315008  | 8731584: |
| 60 NA18552  | [2515685 chr2 | 2 | 87615996  | 87625655  | 9660   | 8   | 0.466356  | 0.069705 | 87615585  | 87616408  | 87625119  | 8762619: |
| 61 NA18552  | [2515685 chr2 | 2 | 87804354  | 87806319  | 1966   | 2   | 0.857137  | 0.13941  | 87803847  | 87804862  | 87806062  | 8780657: |
| 62 NA18552  | [2515685 chr2 | 2 | 87827199  | 87878634  | 51436  | 63  | 0.256757  | 0.024839 | 87826274  | 87828124  | 87877080  | 8788018: |
| 63 NA18552  | [2515685 chr2 | 2 | 87981685  | 88098957  | 117273 | 10  | 0.463211  | 0.062439 | 87965922  | 87984636  | 88097049  | 8810086: |
| 64 NA18552  | [2515685 chr2 | 2 | 88121895  | 88128863  | 6969   | 10  | 0.32382   | 0.062346 | 88121607  | 88122184  | 88128645  | 8812908: |
| 65 NA18552  | [2515685 chr2 | 2 | 91093851  | 91094543  | 693    | 4   | -0.518787 | 0.098578 | 91093617  | 91094086  | 91094491  | 9109459: |
| 66 NA18552  | [2515685 chr2 | 2 | 91163362  | 91173848  | 10487  | 19  | -0.317213 | 0.045231 | 91163145  | 91163579  | 91173844  | 9117385: |
| 67 NA18552  | [2515685 chr2 | 2 | 94850556  | 94878176  | 27621  | 18  | -0.418582 | 0.04647  | 94850330  | 94850783  | 94877811  | 9487854: |
| 68 NA18552  | [2515685 chr2 | 2 | 97184386  | 97189733  | 5348   | 2   | -0.868302 | 0.13941  | 97182781  | 97185992  | 97186782  | 9719672: |
| 69 NA18552  | [2515685 chr2 | 2 | 97613796  | 97614932  | 1137   | 2   | 0.981107  | 0.13941  | 97613553  | 97614040  | 97614467  | 9761539: |
| 70 NA18552  | [2515685 chr2 | 2 | 106339466 | 106344320 | 4855   | 6   | -1.530994 | 0.090918 | 106339069 | 106339864 | 106344055 | 10634458 |
| 71 NA18552  | [2515685 chr2 | 2 | 107475477 | 107477568 | 2092   | 2   | -0.976677 | 0.13941  | 107474333 | 107476621 | 107477239 | 10747789 |
| 72 NA18552  | [2515685 chr2 | 2 | 110076261 | 110081226 | 4966   | 8   | 0.355364  | 0.069705 | 110075654 | 110076869 | 110080529 | 11008192 |
| 73 NA18552  | [2515685 chr2 | 2 | 111757201 | 111759168 | 1968   | 2   | 0.857137  | 0.13941  | 111756944 | 111757458 | 111758661 | 11175967 |
| 74 NA18552  | [2515685 chr2 | 2 | 112224276 | 112315353 | 91078  | 111 | 0.274658  | 0.018713 | 112223230 | 112225323 | 112314900 | 11231580 |
| 75 NA18552  | [2515685 chr2 | 2 | 116248984 | 116390773 | 141790 | 157 | 0.541496  | 0.015749 | 116248373 | 116249596 | 116390529 | 11639101 |
| 76 NA18552  | [2515685 chr2 | 2 | 123190170 | 123198547 | 8378   | 5   | -0.691409 | 0.088171 | 123163920 | 123193121 | 123198337 | 12319875 |
| 77 NA18552  | [2515685 chr2 | 2 | 126159437 | 126168349 | 8913   | 3   | -2.734952 | 0.137421 | 126158494 | 126160381 | 126168048 | 12616865 |
| 78 NA18552  | [2515685 chr2 | 2 | 130525542 | 130530964 | 5423   | 6   | -0.495979 | 0.080488 | 130525010 | 130526075 | 130528769 | 13053316 |
| 79 NA18552  | [2515685 chr2 | 2 | 130748728 | 130761441 | 12714  | 24  | -0.355657 | 0.040244 | 130748468 | 130748988 | 130761107 | 13076177 |
| 80 NA18552  | [2515685 chr2 | 2 | 131765083 | 131782932 | 17850  | 28  | -0.293135 | 0.037259 | 131749458 | 131768034 | 131782590 | 13178327 |
| 81 NA18552  | [2515685 chr2 | 2 | 132272745 | 132323057 | 50313  | 58  | -0.278059 | 0.025888 | 132271619 | 132273872 | 132323825 | 13232329 |
| 82 NA18552  | [2515685 chr2 | 2 | 132332382 | 132335366 | 2985   | 2   | -0.702117 | 0.13941  | 132331267 | 132333497 | 132335122 | 13233561 |
| 83 NA18552  | [2515685 chr2 | 2 | 133150179 | 133163479 | 13301  | 9   | -0.332418 | 0.065719 | 133149969 | 133150389 | 133161737 | 13316522 |
| 84 NA18552  | [2515685 chr2 | 2 | 153622711 | 153625256 | 2546   | 3   | 0.885621  | 0.113828 | 153621175 | 153624247 | 153625088 | 15362542 |
| 85 NA18552  | [2515685 chr2 | 2 | 208176479 | 208184457 | 7979   | 7   | 0.709608  | 0.074518 | 208176093 | 208176865 | 208183930 | 20818498 |
| 86 NA18552  | [2515685 chr2 | 2 | 242664580 | 242668683 | 4104   | 10  | 1.660945  | 0.062496 | 242664284 | 242664877 | 242668532 | 24266883 |
| 87 NA18552  | [2515685 chr2 | 2 | 242748234 | 242749910 | 1677   | 3   | 0.583467  | 0.113828 | 242747892 | 242748577 | 242749742 | 24275007 |
| 88 NA18552  | [2515685 chr3 | 3 | 50907517  | 50907841  | 325    | 3   | 0.821788  | 0.128484 | 50907480  | 50907555  | 50907796  | 5090788: |
| 89 NA18552  | [2515685 chr3 | 3 | 68821474  | 68830847  | 9374   | 17  | -2.052225 | 0.059057 | 68818894  | 68824055  | 68830417  | 6883127: |
| 90 NA18552  | [2515685 chr3 | 3 | 105760262 | 105762355 | 2094   | 2   | -0.785693 | 0.13941  | 105759634 | 105760890 | 105761424 | 10576328 |
| 91 NA18552  | [2515685 chr3 | 3 | 127120875 | 127127395 | 6521   | 10  | -0.345965 | 0.062346 | 127120709 | 127121041 | 127127372 | 12712741 |
| 92 NA18552  | [2515685 chr3 | 3 | 129611885 | 129620741 | 8857   | 13  | -0.349087 | 0.054681 | 129611430 | 129612340 | 129620317 | 12962116 |
| 93 NA18552  | [2515685 chr3 | 3 | 131204575 | 131207291 | 2717   | 5   | -0.466855 | 0.088171 | 131204147 | 131205003 | 131206953 | 13120762 |
| 94 NA18552  | [2515685 chr3 | 3 | 133191392 | 133196576 | 5185   | 5   | -0.758164 | 0.088171 | 133190820 | 133191965 | 133195824 | 13319732 |
| 95 NA18552  | [2515685 chr3 | 3 | 144396830 | 144401520 | 4691   | 6   | 0.467548  | 0.080488 | 144396479 | 144397181 | 144401237 | 14440180 |
| 96 NA18552  | [2515685 chr3 | 3 | 164001043 | 164109483 | 108441 | 102 | -0.299867 | 0.03275  | 164000394 | 164001693 | 164108987 | 16410998 |
| 97 NA18552  | [2515685 chr3 | 3 | 164200660 | 164205886 | 5227   | 5   | -0.68244  | 0.088171 | 164200187 | 164201133 | 164204674 | 16420709 |
| 98 NA18552  | [2515685 chr3 | 3 | 192547312 | 192554331 | 7020   | 10  | 0.835335  | 0.062337 | 192546950 | 192547674 | 192554127 | 19255453 |
| 99 NA18552  | [2515685 chr3 | 3 | 196679304 | 196713584 | 34281  | 33  | 1.094724  | 0.034326 | 196677636 | 196680972 | 196711400 | 19671576 |
| 100 NA18552 | [2515685 chr3 | 3 | 196909913 | 196965802 | 55890  | 49  | -0.345189 | 0.028165 | 196909720 | 196910107 | 196965494 | 19696611 |
| 101 NA18552 | [2515685 chr3 | 3 | 198422794 | 198427408 | 4615   | 2   | 0.979573  | 0.13941  | 198422381 | 198423207 | 198423959 | 19843085 |
| 102 NA18552 | [2515685 chr3 | 3 | 198845327 | 198881375 | 36049  | 41  | -0.26265  | 0.030791 | 198844589 | 198846066 | 198881153 | 19888159 |
| 103 NA18552 | [2515685 chr3 | 3 | 199313925 | 199321063 | 7139   | 15  | 1.141669  | 0.050905 | 199313515 | 199314336 | 199320844 | 19932128 |
| 104 NA18552 | [2515685 chr4 | 4 | 1730665   | 1753705   | 23041  | 25  | -0.273714 | 0.039431 | 1730163   | 1731167   | 1753306   | 1754104  |
| 105 NA18552 | [2515685 chr4 | 4 | 8741632   | 8757471   | 15840  | 22  | 0.510881  | 0.042034 | 8741430   | 8741835   | 8757086   | 8757857  |
| 106 NA18552 | [2515685 chr4 | 4 | 9001573   | 9046719   | 45147  | 86  | 0.693445  | 0.02126  | 9001243   | 9001903   | 9046129   | 9047305  |

|             |               |   |           |           |        |     |           |          |           |           |           |          |
|-------------|---------------|---|-----------|-----------|--------|-----|-----------|----------|-----------|-----------|-----------|----------|
| 107 NA18552 | [2515685 chr4 | 4 | 9299467   | 9304702   | 5236   | 3   | -0.71147  | 0.113828 | 9295439   | 9302535   | 9304241   | 9305163  |
| 108 NA18552 | [2515685 chr4 | 4 | 9812346   | 9813108   | 763    | 33  | 0.914643  | 0.03432  | 9812284   | 9812408   | 9812952   | 9813261  |
| 109 NA18552 | [2515685 chr4 | 4 | 9887220   | 9910115   | 22896  | 28  | 1.418456  | 0.044225 | 9886886   | 9887555   | 9909843   | 9910388  |
| 110 NA18552 | [2515685 chr4 | 4 | 34602797  | 34650994  | 48198  | 45  | 0.778683  | 0.030305 | 34601994  | 34603600  | 34649535  | 3465245  |
| 111 NA18552 | [2515685 chr4 | 4 | 49056186  | 49076811  | 20626  | 20  | -0.397737 | 0.044085 | 49056106  | 49056267  | 49076711  | 4907691  |
| 112 NA18552 | [2515685 chr4 | 4 | 49124969  | 49171182  | 46214  | 166 | -0.263653 | 0.015302 | 49124860  | 49125078  | 49171073  | 4917129  |
| 113 NA18552 | [2515685 chr4 | 4 | 49406160  | 49421558  | 15399  | 9   | -0.572051 | 0.065719 | 49405299  | 49407022  | 49421420  | 4942169  |
| 114 NA18552 | [2515685 chr4 | 4 | 49433465  | 49438219  | 4755   | 8   | -0.436449 | 0.069705 | 49432792  | 49434138  | 49435151  | 4945013  |
| 115 NA18552 | [2515685 chr4 | 4 | 58094443  | 58106948  | 12506  | 11  | -0.442341 | 0.060342 | 58090798  | 58097511  | 58106742  | 5810715  |
| 116 NA18552 | [2515685 chr4 | 4 | 61749710  | 61751186  | 1477   | 2   | -0.81498  | 0.13941  | 61749399  | 61750021  | 61750674  | 6175169  |
| 117 NA18552 | [2515685 chr4 | 4 | 63500372  | 63504889  | 4518   | 5   | -0.779972 | 0.103396 | 63494261  | 63503440  | 63504639  | 6350514  |
| 118 NA18552 | [2515685 chr4 | 4 | 77655751  | 77677385  | 21635  | 13  | 0.281314  | 0.056134 | 77655370  | 77656133  | 77675208  | 7767956  |
| 119 NA18552 | [2515685 chr4 | 4 | 115534208 | 115541546 | 7339   | 9   | 0.801454  | 0.068492 | 115530015 | 115537276 | 115539984 | 11554310 |
| 120 NA18552 | [2515685 chr4 | 4 | 133000684 | 133044905 | 44222  | 24  | -0.393848 | 0.040238 | 132999479 | 133001890 | 133044609 | 13304520 |
| 121 NA18552 | [2515685 chr4 | 4 | 138449561 | 138457787 | 8227   | 7   | -0.895929 | 0.075789 | 138448993 | 138450130 | 138457283 | 13845829 |
| 122 NA18552 | [2515685 chr4 | 4 | 138537751 | 138549906 | 12156  | 14  | 0.888208  | 0.057466 | 138537443 | 138538059 | 138547414 | 13855239 |
| 123 NA18552 | [2515685 chr4 | 4 | 145013091 | 145017379 | 4289   | 4   | 0.519749  | 0.098578 | 145010831 | 145015351 | 145017113 | 14501764 |
| 124 NA18552 | [2515685 chr4 | 4 | 145115514 | 145181332 | 65819  | 68  | 0.256801  | 0.024055 | 145115176 | 145115852 | 145181117 | 14518154 |
| 125 NA18552 | [2515685 chr4 | 4 | 145271307 | 145402280 | 130974 | 146 | 0.3855    | 0.016333 | 145270866 | 145271749 | 145401303 | 14540325 |
| 126 NA18552 | [2515685 chr4 | 4 | 158680453 | 158687424 | 6972   | 3   | 0.661406  | 0.130045 | 158679988 | 158680919 | 158686979 | 15868787 |
| 127 NA18552 | [2515685 chr4 | 4 | 162806038 | 162809269 | 3232   | 3   | -1.718978 | 0.137058 | 162804872 | 162807204 | 162808734 | 16280980 |
| 128 NA18552 | [2515685 chr4 | 4 | 169184442 | 169365759 | 181318 | 160 | 0.732345  | 0.015895 | 169184090 | 169184794 | 169362691 | 16937002 |
| 129 NA18552 | [2515685 chr4 | 4 | 173799832 | 173807323 | 7492   | 6   | -2.273666 | 0.129239 | 173799464 | 173800201 | 173804255 | 17381134 |
| 130 NA18552 | [2515685 chr4 | 4 | 183944886 | 183947025 | 2140   | 3   | -0.880923 | 0.113828 | 183944291 | 183945482 | 183946755 | 18394729 |
| 131 NA18552 | [2515685 chr4 | 4 | 185533276 | 185544849 | 11574  | 12  | 0.743588  | 0.056914 | 185532696 | 185533857 | 185543276 | 18554642 |
| 132 NA18552 | [2515685 chr4 | 4 | 187728494 | 187732907 | 4414   | 15  | 2.335927  | 0.058122 | 187728193 | 187728795 | 187732541 | 18773327 |
| 133 NA18552 | [2515685 chr4 | 4 | 188255523 | 188269680 | 14158  | 235 | 0.603208  | 0.012855 | 188255215 | 188255831 | 188269403 | 18826995 |
| 134 NA18552 | [2515685 chr4 | 4 | 189799455 | 189806541 | 7087   | 10  | -0.46649  | 0.062346 | 189799180 | 189799730 | 189806018 | 18980706 |
| 135 NA18552 | [2515685 chr4 | 4 | 190528602 | 190533163 | 4562   | 21  | -2.780634 | 0.054789 | 190528058 | 190529146 | 190531664 | 19053466 |
| 136 NA18552 | [2515685 chr5 | 5 | 261631    | 269203    | 7573   | 25  | -0.304332 | 0.039431 | 261032    | 262230    | 268895    | 269512   |
| 137 NA18552 | [2515685 chr5 | 5 | 734328    | 863984    | 129657 | 117 | -0.377751 | 0.018238 | 733972    | 734685    | 863592    | 864376   |
| 138 NA18552 | [2515685 chr5 | 5 | 893737    | 902652    | 8916   | 13  | -0.416238 | 0.054681 | 893518    | 893957    | 902127    | 903178   |
| 139 NA18552 | [2515685 chr5 | 5 | 1075284   | 1081260   | 5977   | 26  | 0.266746  | 0.038665 | 1074709   | 1075859   | 1080755   | 1081766  |
| 140 NA18552 | [2515685 chr5 | 5 | 1122995   | 1126517   | 3523   | 38  | 0.559181  | 0.031983 | 1122772   | 1123219   | 1126389   | 1126646  |
| 141 NA18552 | [2515685 chr5 | 5 | 1231558   | 1233247   | 1690   | 2   | -0.989141 | 0.13941  | 1231167   | 1231949   | 1232879   | 1233615  |
| 142 NA18552 | [2515685 chr5 | 5 | 1664589   | 1681012   | 16424  | 7   | -0.404828 | 0.074518 | 1655788   | 1667781   | 1680951   | 1681074  |
| 143 NA18552 | [2515685 chr5 | 5 | 12863961  | 12873512  | 9552   | 14  | -0.620677 | 0.054964 | 12863778  | 12864144  | 12873198  | 1287382  |
| 144 NA18552 | [2515685 chr5 | 5 | 17570617  | 17643104  | 72488  | 330 | -0.656166 | 0.010853 | 17570551  | 17570684  | 17642455  | 1764375  |
| 145 NA18552 | [2515685 chr5 | 5 | 17663728  | 17667407  | 3680   | 8   | -0.490828 | 0.069705 | 17663473  | 17663984  | 17667174  | 1766764  |
| 146 NA18552 | [2515685 chr5 | 5 | 21483394  | 21488673  | 5280   | 5   | -0.52368  | 0.088171 | 21480817  | 21485972  | 21488439  | 2148890  |
| 147 NA18552 | [2515685 chr5 | 5 | 21523908  | 21532321  | 8414   | 20  | -0.36847  | 0.044085 | 21523797  | 21524019  | 21532217  | 2153242  |
| 148 NA18552 | [2515685 chr5 | 5 | 21539920  | 21557224  | 17305  | 33  | 0.284142  | 0.03432  | 21539901  | 21539939  | 21556706  | 2155774  |
| 149 NA18552 | [2515685 chr5 | 5 | 21972952  | 22050956  | 78005  | 119 | 0.306667  | 0.018144 | 21972928  | 21972976  | 22050370  | 2205154  |
| 150 NA18552 | [2515685 chr5 | 5 | 26831997  | 26837938  | 5942   | 6   | 0.706608  | 0.084862 | 26829858  | 26834136  | 26837469  | 2683840  |
| 151 NA18552 | [2515685 chr5 | 5 | 34214373  | 34221996  | 7624   | 23  | -0.344389 | 0.04111  | 34214196  | 34214550  | 34221886  | 3422210  |
| 152 NA18552 | [2515685 chr5 | 5 | 68887452  | 68889446  | 1995   | 8   | 0.4984    | 0.070125 | 68887180  | 68887724  | 68889242  | 6888965  |
| 153 NA18552 | [2515685 chr5 | 5 | 68903146  | 68914183  | 11038  | 10  | 0.55582   | 0.064035 | 68902441  | 68903851  | 68914064  | 6891430  |
| 154 NA18552 | [2515685 chr5 | 5 | 68973438  | 68978075  | 4638   | 18  | -0.403719 | 0.04647  | 68973414  | 68973463  | 68977738  | 6897841  |
| 155 NA18552 | [2515685 chr5 | 5 | 69001842  | 69216118  | 214277 | 491 | 0.274196  | 0.008898 | 69001628  | 69002057  | 69215664  | 6921657  |
| 156 NA18552 | [2515685 chr5 | 5 | 69266778  | 69424934  | 158157 | 216 | 0.305492  | 0.009994 | 69265610  | 69267947  | 69424531  | 6942533  |
| 157 NA18552 | [2515685 chr5 | 5 | 69433946  | 69514569  | 80624  | 158 | 0.305492  | 0.009994 | 69433170  | 69434722  | 69513457  | 6951568  |
| 158 NA18552 | [2515685 chr5 | 5 | 69581583  | 69779602  | 198020 | 414 | 0.271308  | 0.009704 | 69581369  | 69581798  | 69779323  | 6977988  |
| 159 NA18552 | [2515685 chr5 | 5 | 69803645  | 69805874  | 2230   | 6   | 0.53604   | 0.080488 | 69803354  | 69803937  | 69805774  | 6980597  |
| 160 NA18552 | [2515685 chr5 | 5 | 69828270  | 69832909  | 4640   | 16  | -0.399051 | 0.049289 | 69828246  | 69828295  | 69832572  | 6983324  |
| 161 NA18552 | [2515685 chr5 | 5 | 69849554  | 69854192  | 4639   | 16  | -0.399051 | 0.049289 | 69849530  | 69849579  | 69853857  | 6985452  |

|             |               |   |           |           |        |     |           |          |           |           |           |          |
|-------------|---------------|---|-----------|-----------|--------|-----|-----------|----------|-----------|-----------|-----------|----------|
| 162 NA18552 | [2515685 chr5 | 5 | 69884741  | 70092000  | 207260 | 443 | 0.264867  | 0.009367 | 69884503  | 69884979  | 70091546  | 7009245! |
| 163 NA18552 | [2515685 chr5 | 5 | 70106303  | 70122148  | 15846  | 41  | -0.255877 | 0.030791 | 70106156  | 70106451  | 70122044  | 7012225: |
| 164 NA18552 | [2515685 chr5 | 5 | 70141823  | 70182062  | 40240  | 61  | 0.336797  | 0.025243 | 70140660  | 70142987  | 70182005  | 7018211! |
| 165 NA18552 | [2515685 chr5 | 5 | 70234063  | 70286789  | 52727  | 51  | 0.456858  | 0.027693 | 70233369  | 70234758  | 70286122  | 7028745! |
| 166 NA18552 | [2515685 chr5 | 5 | 70334592  | 70336822  | 2231   | 6   | 0.53604   | 0.080488 | 70334491  | 70334694  | 70336531  | 7033711- |
| 167 NA18552 | [2515685 chr5 | 5 | 70377017  | 70387919  | 10903  | 12  | 0.535929  | 0.056914 | 70376734  | 70377301  | 70387214  | 7038862- |
| 168 NA18552 | [2515685 chr5 | 5 | 70401654  | 70403953  | 2300   | 7   | 0.506606  | 0.075032 | 70401282  | 70402026  | 70403337  | 7040456! |
| 169 NA18552 | [2515685 chr5 | 5 | 70459489  | 70464475  | 4987   | 14  | 0.441728  | 0.052692 | 70459389  | 70459590  | 70464318  | 7046463: |
| 170 NA18552 | [2515685 chr5 | 5 | 70474670  | 70514955  | 40286  | 69  | 0.373392  | 0.023735 | 70474613  | 70474727  | 70513837  | 7051607- |
| 171 NA18552 | [2515685 chr5 | 5 | 70581865  | 70675183  | 93319  | 204 | 0.269105  | 0.013804 | 70581694  | 70582037  | 70675014  | 7067535: |
| 172 NA18552 | [2515685 chr5 | 5 | 81459213  | 81466055  | 6843   | 2   | -1.151823 | 0.13941  | 81455614  | 81462405  | 81462863  | 8147028! |
| 173 NA18552 | [2515685 chr5 | 5 | 93928460  | 93933101  | 4642   | 4   | -0.671034 | 0.098578 | 93927706  | 93929215  | 93931984  | 9393421! |
| 174 NA18552 | [2515685 chr5 | 5 | 97426242  | 97428665  | 2424   | 5   | 0.545002  | 0.088171 | 97426041  | 97426444  | 97428529  | 9742880' |
| 175 NA18552 | [2515685 chr5 | 5 | 98892975  | 98900161  | 7187   | 15  | -0.31579  | 0.050905 | 98892864  | 98893087  | 98900052  | 9890027! |
| 176 NA18552 | [2515685 chr5 | 5 | 99408801  | 99419037  | 10237  | 14  | -0.462632 | 0.032859 | 99408605  | 99408997  | 99418328  | 9941974! |
| 177 NA18552 | [2515685 chr5 | 5 | 99424905  | 99431959  | 7055   | 15  | -0.462632 | 0.032859 | 99424257  | 99425553  | 99431617  | 9943230: |
| 178 NA18552 | [2515685 chr5 | 5 | 99737846  | 99748483  | 10638  | 20  | -0.371243 | 0.044085 | 99737509  | 99738184  | 99748296  | 9974867' |
| 179 NA18552 | [2515685 chr5 | 5 | 125364118 | 125492535 | 128418 | 2   | 0.698351  | 0.13941  | 125335472 | 125367310 | 125489343 | 12555622 |
| 180 NA18552 | [2515685 chr5 | 5 | 137835848 | 137847817 | 11970  | 10  | 0.395706  | 0.063908 | 137835611 | 137836085 | 137846719 | 13784891 |
| 181 NA18552 | [2515685 chr5 | 5 | 140203081 | 140217091 | 14011  | 16  | 2.141928  | 0.061339 | 140202344 | 140203819 | 140216552 | 14021763 |
| 182 NA18552 | [2515685 chr5 | 5 | 140217091 | 140218928 | 1838   | 2   | 1.024785  | 0.147411 | 140216552 | 140217631 | 140218508 | 14021934 |
| 183 NA18552 | [2515685 chr5 | 5 | 150156889 | 150161837 | 4949   | 7   | -0.694692 | 0.075335 | 150156493 | 150157286 | 150161621 | 15016205 |
| 184 NA18552 | [2515685 chr5 | 5 | 150183322 | 150204419 | 21098  | 12  | -0.667508 | 0.05702  | 150181427 | 150185218 | 150204151 | 15020468 |
| 185 NA18552 | [2515685 chr5 | 5 | 175392637 | 175397391 | 4755   | 8   | -0.420121 | 0.069705 | 175392088 | 175393187 | 175394782 | 17540000 |
| 186 NA18552 | [2515685 chr5 | 5 | 175547133 | 175555348 | 8216   | 11  | -0.313352 | 0.059445 | 175546842 | 175547424 | 175554929 | 17555576 |
| 187 NA18552 | [2515685 chr5 | 5 | 180046997 | 180049857 | 2861   | 2   | 0.716668  | 0.140337 | 180046872 | 180047122 | 180048976 | 18005073 |
| 188 NA18552 | [2515685 chr5 | 5 | 180309823 | 180363417 | 53595  | 51  | 0.456337  | 0.02783  | 180309690 | 180309956 | 180363120 | 18036371 |
| 189 NA18552 | [2515685 chr6 | 6 | 121496    | 124826    | 3331   | 2   | -0.869783 | 0.13941  | 121016    | 121977    | 123194    | 126455   |
| 190 NA18552 | [2515685 chr6 | 6 | 201167    | 234805    | 33639  | 24  | -0.316782 | 0.040244 | 200920    | 201415    | 234242    | 235368   |
| 191 NA18552 | [2515685 chr6 | 6 | 240929    | 324395    | 83467  | 97  | 0.386476  | 0.020018 | 240278    | 241581    | 323926    | 324865   |
| 192 NA18552 | [2515685 chr6 | 6 | 26840769  | 26877276  | 36508  | 76  | -0.265605 | 0.022615 | 26840610  | 26840928  | 26877118  | 2687743! |
| 193 NA18552 | [2515685 chr6 | 6 | 26960263  | 26968180  | 7918   | 17  | -0.384361 | 0.047817 | 26959735  | 26960792  | 26968088  | 2696827: |
| 194 NA18552 | [2515685 chr6 | 6 | 29958572  | 30001954  | 43383  | 39  | 0.335621  | 0.026648 | 29957670  | 29959474  | 30001801  | 3000210! |
| 195 NA18552 | [2515685 chr6 | 6 | 30004580  | 30017868  | 13289  | 11  | 0.335621  | 0.026648 | 30004338  | 30004822  | 30017587  | 3001814! |
| 196 NA18552 | [2515685 chr6 | 6 | 31345252  | 31346265  | 1014   | 2   | -0.744677 | 0.13941  | 31344957  | 31345548  | 31345931  | 3134659! |
| 197 NA18552 | [2515685 chr6 | 6 | 31387065  | 31394296  | 7232   | 12  | 0.293768  | 0.057026 | 31386395  | 31387736  | 31394097  | 3139449! |
| 198 NA18552 | [2515685 chr6 | 6 | 32564602  | 32586862  | 22261  | 4   | -0.911139 | 0.152252 | 32564316  | 32564888  | 32586127  | 3258759' |
| 199 NA18552 | [2515685 chr6 | 6 | 32631127  | 32632349  | 1223   | 2   | -0.700616 | 0.13941  | 32630911  | 32631343  | 32632089  | 3263261! |
| 200 NA18552 | [2515685 chr6 | 6 | 32653862  | 32654720  | 859    | 2   | 1.498042  | 0.190659 | 32653679  | 32654046  | 32654460  | 3265498! |
| 201 NA18552 | [2515685 chr6 | 6 | 32666229  | 32667673  | 1445   | 3   | 0.73594   | 0.115469 | 32665899  | 32666560  | 32667507  | 3266783: |
| 202 NA18552 | [2515685 chr6 | 6 | 32672888  | 32680751  | 7864   | 7   | 0.564986  | 0.075067 | 32672612  | 32673164  | 32680547  | 3268095! |
| 203 NA18552 | [2515685 chr6 | 6 | 32711084  | 32744343  | 33260  | 39  | 0.464624  | 0.032344 | 32710454  | 32711715  | 32744136  | 3274455! |
| 204 NA18552 | [2515685 chr6 | 6 | 35862833  | 35879904  | 17072  | 16  | 0.454511  | 0.049527 | 35862530  | 35863136  | 35879292  | 3588051: |
| 205 NA18552 | [2515685 chr6 | 6 | 54023043  | 54087831  | 64789  | 65  | 0.991385  | 0.025001 | 54022450  | 54023636  | 54086623  | 5408903: |
| 206 NA18552 | [2515685 chr6 | 6 | 58359812  | 58367787  | 7976   | 18  | -0.362169 | 0.04647  | 58359287  | 58360338  | 58367676  | 5836789! |
| 207 NA18552 | [2515685 chr6 | 6 | 66455162  | 66461833  | 6672   | 5   | -0.762105 | 0.092577 | 66454046  | 66456278  | 66461410  | 6646225: |
| 208 NA18552 | [2515685 chr6 | 6 | 67845041  | 67851028  | 5988   | 15  | 0.262911  | 0.051753 | 67844907  | 67845175  | 67850924  | 6785113: |
| 209 NA18552 | [2515685 chr6 | 6 | 74648985  | 74654614  | 5630   | 10  | -2.583616 | 0.084122 | 74648748  | 74649222  | 74653982  | 7465524: |
| 210 NA18552 | [2515685 chr6 | 6 | 77495034  | 77513511  | 18478  | 12  | 0.727103  | 0.059272 | 77493568  | 77496500  | 77510011  | 7751769: |
| 211 NA18552 | [2515685 chr6 | 6 | 79023318  | 79093263  | 69946  | 69  | 0.803448  | 0.024067 | 79022028  | 79024609  | 79091909  | 7909461! |
| 212 NA18552 | [2515685 chr6 | 6 | 121032825 | 121043996 | 11172  | 19  | 0.257238  | 0.046398 | 121032497 | 121033154 | 121043316 | 12104467 |
| 213 NA18552 | [2515685 chr6 | 6 | 128347205 | 128356677 | 9473   | 13  | 0.285694  | 0.055372 | 128346664 | 128347747 | 128356239 | 12835711 |
| 214 NA18552 | [2515685 chr6 | 6 | 160056728 | 160059956 | 3229   | 3   | -0.737822 | 0.113828 | 160055808 | 160057648 | 160059674 | 16006023 |
| 215 NA18552 | [2515685 chr6 | 6 | 161003739 | 161038394 | 34656  | 60  | 0.529213  | 0.025449 | 161003541 | 161003937 | 161038184 | 16103860 |
| 216 NA18552 | [2515685 chr6 | 6 | 168534190 | 168542443 | 8254   | 16  | -0.270409 | 0.049289 | 168533806 | 168534574 | 168539314 | 16854557 |

|             |               |   |           |           |        |      |           |          |           |           |           |          |
|-------------|---------------|---|-----------|-----------|--------|------|-----------|----------|-----------|-----------|-----------|----------|
| 217 NA18552 | [2515685 chr6 | 6 | 168780035 | 168781989 | 1955   | 4    | -0.540001 | 0.098578 | 168779504 | 168780567 | 168781555 | 16878242 |
| 218 NA18552 | [2515685 chr6 | 6 | 169324016 | 169335033 | 11018  | 14   | -0.717896 | 0.052692 | 169323927 | 169324106 | 169334364 | 16933570 |
| 219 NA18552 | [2515685 chr6 | 6 | 170721483 | 170724403 | 2921   | 12   | -0.597597 | 0.056914 | 170721218 | 170721749 | 170724050 | 17072475 |
| 220 NA18552 | [2515685 chr7 | 7 | 3384111   | 3392458   | 8348   | 7    | 0.639583  | 0.074518 | 3383451   | 3384772   | 3390107   | 339561!  |
| 221 NA18552 | [2515685 chr7 | 7 | 9576370   | 9681522   | 105153 | 102  | 0.833803  | 0.019559 | 9573898   | 9578721   | 9679663   | 968338?  |
| 222 NA18552 | [2515685 chr7 | 7 | 19307726  | 19311681  | 3956   | 5    | 0.452365  | 0.088171 | 19307004  | 19308449  | 19311160  | 1931220; |
| 223 NA18552 | [2515685 chr7 | 7 | 29443211  | 29561703  | 118493 | 101  | 0.591789  | 0.01964  | 29442384  | 29444038  | 29561135  | 2956227; |
| 224 NA18552 | [2515685 chr7 | 7 | 62131323  | 62135875  | 4553   | 9    | -0.496905 | 0.065718 | 62130670  | 62131977  | 62135619  | 6213613  |
| 225 NA18552 | [2515685 chr7 | 7 | 62214747  | 62249103  | 34357  | 141  | -0.304151 | 0.016735 | 62206024  | 62217098  | 62248187  | 6225001! |
| 226 NA18552 | [2515685 chr7 | 7 | 62308061  | 62352319  | 44259  | 152  | -0.301246 | 0.016109 | 62307145  | 62308978  | 62352252  | 6235238  |
| 227 NA18552 | [2515685 chr7 | 7 | 64028465  | 64046357  | 17893  | 49   | -0.336336 | 0.028165 | 64027806  | 64029125  | 64046143  | 6404657  |
| 228 NA18552 | [2515685 chr7 | 7 | 64464087  | 64481591  | 17505  | 46   | -0.351555 | 0.029069 | 64463669  | 64464506  | 64481417  | 6448176! |
| 229 NA18552 | [2515685 chr7 | 7 | 64538610  | 64556662  | 18053  | 48   | -0.336347 | 0.028457 | 64537873  | 64539348  | 64556244  | 6455708! |
| 230 NA18552 | [2515685 chr7 | 7 | 64691204  | 64725545  | 34342  | 38   | 0.360743  | 0.032254 | 64690582  | 64691826  | 64725209  | 6472588; |
| 231 NA18552 | [2515685 chr7 | 7 | 69869623  | 69871056  | 1434   | 2    | 1.767555  | 0.145176 | 69869269  | 69869978  | 69870420  | 6987169; |
| 232 NA18552 | [2515685 chr7 | 7 | 71938916  | 71939766  | 851    | 5    | -0.46036  | 0.088171 | 71938731  | 71939101  | 71939618  | 7193991- |
| 233 NA18552 | [2515685 chr7 | 7 | 75790452  | 75794984  | 4533   | 5    | -0.730339 | 0.088171 | 75790248  | 75790656  | 75794325  | 7579564; |
| 234 NA18552 | [2515685 chr7 | 7 | 92972933  | 92976895  | 3963   | 2    | 1.338733  | 0.14475  | 92972732  | 92973135  | 92975569  | 9297822  |
| 235 NA18552 | [2515685 chr7 | 7 | 97032078  | 97047344  | 15267  | 17   | -0.615698 | 0.050242 | 97031625  | 97032531  | 97046973  | 9704771! |
| 236 NA18552 | [2515685 chr7 | 7 | 97198480  | 97205421  | 6942   | 16   | -0.360106 | 0.049289 | 97198242  | 97198718  | 97204783  | 9720606! |
| 237 NA18552 | [2515685 chr7 | 7 | 97298311  | 97301957  | 3647   | 2    | -0.697139 | 0.13941  | 97297568  | 97299055  | 97301329  | 9730258! |
| 238 NA18552 | [2515685 chr7 | 7 | 109034783 | 109042071 | 7289   | 6    | 1.793663  | 0.099394 | 109024063 | 109037134 | 109040586 | 10904355 |
| 239 NA18552 | [2515685 chr7 | 7 | 125639507 | 125644775 | 5269   | 6    | -2.217529 | 0.11935  | 125639054 | 125639961 | 125644046 | 12564550 |
| 240 NA18552 | [2515685 chr7 | 7 | 126107497 | 126126371 | 18875  | 28   | -0.265912 | 0.037259 | 126107134 | 126107861 | 126125619 | 12612712 |
| 241 NA18552 | [2515685 chr7 | 7 | 133241895 | 133257360 | 15466  | 15   | 1.590042  | 0.059289 | 133240782 | 133243008 | 133255009 | 13326093 |
| 242 NA18552 | [2515685 chr7 | 7 | 141218636 | 141247657 | 29022  | 30   | -0.529215 | 0.037122 | 141217990 | 141219282 | 141247027 | 14124828 |
| 243 NA18552 | [2515685 chr7 | 7 | 141496492 | 141505136 | 8645   | 11   | -0.420279 | 0.060343 | 141495918 | 141497066 | 141504428 | 14150584 |
| 244 NA18552 | [2515685 chr7 | 7 | 141505136 | 141521152 | 16017  | 19   | -1.470169 | 0.054419 | 141504428 | 141505844 | 141520892 | 14152141 |
| 245 NA18552 | [2515685 chr7 | 7 | 141521152 | 141527443 | 6292   | 10   | -0.389862 | 0.062346 | 141520892 | 141521412 | 141527046 | 14152784 |
| 246 NA18552 | [2515685 chr7 | 7 | 141959475 | 141991871 | 32397  | 38   | -0.699809 | 0.032223 | 141958946 | 141960004 | 141991092 | 14199265 |
| 247 NA18552 | [2515685 chr7 | 7 | 142833396 | 142835577 | 2182   | 4    | -0.496203 | 0.098578 | 142832914 | 142833879 | 142835519 | 14283563 |
| 248 NA18552 | [2515685 chr7 | 7 | 142970751 | 142972932 | 2182   | 4    | -0.496204 | 0.098578 | 142970694 | 142970809 | 142972450 | 14297341 |
| 249 NA18552 | [2515685 chr7 | 7 | 142991428 | 143000518 | 9091   | 21   | -0.293896 | 0.043023 | 142991148 | 142991709 | 143000258 | 14300077 |
| 250 NA18552 | [2515685 chr7 | 7 | 143409190 | 143413236 | 4047   | 9    | -0.491786 | 0.065719 | 143408962 | 143409419 | 143413031 | 14341344 |
| 251 NA18552 | [2515685 chr7 | 7 | 155886350 | 155893882 | 7533   | 5    | -0.617679 | 0.088171 | 155885986 | 155886714 | 155893433 | 15589433 |
| 252 NA18552 | [2515685 chr7 | 7 | 156939035 | 156942423 | 3389   | 5    | -0.657484 | 0.088171 | 156938932 | 156939138 | 156941474 | 15694337 |
| 253 NA18552 | [2515685 chr7 | 7 | 156976112 | 156978464 | 2353   | 2    | 0.797586  | 0.13941  | 156975812 | 156976413 | 15697896  | 15697903 |
| 254 NA18552 | [2515685 chr7 | 7 | 158207288 | 158209880 | 2593   | 2    | 0.87544   | 0.13941  | 158206344 | 158208233 | 158209333 | 15821042 |
| 255 NA18552 | [2515685 chr7 | 7 | 158616464 | 158624379 | 7916   | 7    | 0.671625  | 0.076303 | 158616165 | 158616763 | 158622028 | 15862673 |
| 256 NA18552 | [2515685 chr8 | 8 | 1328256   | 1343509   | 15254  | 45   | -1.434509 | 0.029686 | 1327688   | 1328824   | 1342795   | 1344224  |
| 257 NA18552 | [2515685 chr8 | 8 | 1396135   | 1398803   | 2669   | 4    | -0.602922 | 0.098578 | 1395585   | 1396686   | 1398426   | 1399187  |
| 258 NA18552 | [2515685 chr8 | 8 | 2202770   | 2203520   | 751    | 3    | -0.6326   | 0.113828 | 2202506   | 2203034   | 2203382   | 2203659  |
| 259 NA18552 | [2515685 chr8 | 8 | 2238734   | 2253793   | 15060  | 10   | 0.786905  | 0.062346 | 2233839   | 2241488   | 2251039   | 225752!  |
| 260 NA18552 | [2515685 chr8 | 8 | 3722262   | 3728914   | 6653   | 7    | 0.409354  | 0.075931 | 3721968   | 3722556   | 3728669   | 372915!  |
| 261 NA18552 | [2515685 chr8 | 8 | 3773583   | 3778609   | 5027   | 7    | -0.871404 | 0.074602 | 3773236   | 3773931   | 3778103   | 377911!  |
| 262 NA18552 | [2515685 chr8 | 8 | 4110204   | 4112526   | 2323   | 2    | 2.590316  | 0.196723 | 4109692   | 4110717   | 4112031   | 411302;  |
| 263 NA18552 | [2515685 chr8 | 8 | 5582875   | 5594011   | 11137  | 9    | 0.710708  | 0.065719 | 5582615   | 5583135   | 5592820   | 559520;  |
| 264 NA18552 | [2515685 chr8 | 8 | 6813967   | 6815529   | 1563   | 2    | -0.869429 | 0.13941  | 6813560   | 6814375   | 6815199   | 681586!  |
| 265 NA18552 | [2515685 chr8 | 8 | 7061162   | 7075965   | 14804  | 24   | -0.34737  | 0.040244 | 7060897   | 7061427   | 7075687   | 7076244  |
| 266 NA18552 | [2515685 chr8 | 8 | 7097781   | 7929654   | 831874 | 1666 | -0.469618 | 0.004748 | 7097278   | 7098285   | 7929154   | 793015!  |
| 267 NA18552 | [2515685 chr8 | 8 | 7951432   | 7966244   | 14813  | 38   | -0.469618 | 0.004748 | 7951122   | 7951743   | 7965980   | 796650!  |
| 268 NA18552 | [2515685 chr8 | 8 | 11903424  | 11912906  | 9483   | 19   | -0.283636 | 0.045231 | 11902919  | 11903929  | 11912660  | 1191315; |
| 269 NA18552 | [2515685 chr8 | 8 | 11985533  | 12022263  | 36731  | 65   | -0.25088  | 0.024454 | 11982232  | 11988287  | 12022136  | 1202239! |
| 270 NA18552 | [2515685 chr8 | 8 | 12023134  | 12034819  | 11686  | 32   | 0.551493  | 0.034853 | 12022997  | 12023272  | 12034665  | 1203497; |
| 271 NA18552 | [2515685 chr8 | 8 | 12035286  | 12072888  | 37603  | 77   | -0.509943 | 0.022527 | 12034973  | 12035599  | 12072625  | 1207315; |



|             |                |    |           |           |        |      |           |          |           |           |           |          |
|-------------|----------------|----|-----------|-----------|--------|------|-----------|----------|-----------|-----------|-----------|----------|
| 272 NA18552 | [2515685 chr8  | 8  | 12276057  | 12284041  | 7985   | 15   | 0.473772  | 0.050905 | 12275908  | 12276206  | 12283622  | 1228446  |
| 273 NA18552 | [2515685 chr8  | 8  | 12306608  | 12322179  | 15572  | 35   | -0.562403 | 0.033325 | 12306377  | 12306840  | 12321906  | 1232245  |
| 274 NA18552 | [2515685 chr8  | 8  | 12502944  | 12510593  | 7650   | 22   | -0.420499 | 0.042034 | 12502935  | 12502953  | 12510425  | 1251076  |
| 275 NA18552 | [2515685 chr8  | 8  | 13509983  | 13578345  | 68363  | 10   | 0.32844   | 0.062346 | 13387457  | 13512737  | 13577533  | 1357915  |
| 276 NA18552 | [2515685 chr8  | 8  | 21661738  | 21714724  | 52987  | 39   | -0.256801 | 0.03157  | 21660494  | 21662982  | 21714490  | 2171495  |
| 277 NA18552 | [2515685 chr8  | 8  | 58274975  | 58287850  | 12876  | 11   | 0.727616  | 0.059445 | 58274186  | 58275764  | 58287616  | 5828808  |
| 278 NA18552 | [2515685 chr8  | 8  | 58357545  | 58359483  | 1939   | 3    | 0.659378  | 0.113828 | 58357174  | 58357917  | 58359260  | 5835970  |
| 279 NA18552 | [2515685 chr8  | 8  | 85423649  | 85431920  | 8272   | 7    | 0.946915  | 0.074507 | 85423043  | 85424256  | 85431347  | 8543249  |
| 280 NA18552 | [2515685 chr8  | 8  | 86742169  | 86910255  | 168087 | 99   | 0.712777  | 0.019818 | 86741757  | 86742581  | 86910002  | 8691050  |
| 281 NA18552 | [2515685 chr8  | 8  | 120222660 | 120228243 | 5584   | 4    | 1.034593  | 0.098578 | 120218251 | 120225414 | 120227679 | 12022880 |
| 282 NA18552 | [2515685 chr9  | 9  | 310045    | 313497    | 3453   | 62   | 0.334981  | 0.025039 | 309952    | 310139    | 312740    | 314255   |
| 283 NA18552 | [2515685 chr9  | 9  | 33783006  | 33795723  | 12718  | 15   | -0.344356 | 0.050905 | 33782372  | 33783640  | 33794335  | 3379711  |
| 284 NA18552 | [2515685 chr9  | 9  | 38534534  | 38561528  | 26995  | 16   | -0.349085 | 0.049289 | 38534046  | 38535023  | 38561018  | 3856203  |
| 285 NA18552 | [2515685 chr9  | 9  | 38766249  | 38954466  | 188218 | 331  | -0.276923 | 0.010853 | 38766136  | 38766362  | 38954213  | 3895471  |
| 286 NA18552 | [2515685 chr9  | 9  | 39025016  | 39027704  | 2689   | 2    | -0.714965 | 0.13941  | 39023735  | 39026298  | 39027196  | 3902821  |
| 287 NA18552 | [2515685 chr9  | 9  | 39814186  | 39815652  | 1467   | 2    | -0.714484 | 0.13941  | 39814035  | 39814337  | 39814733  | 3981657  |
| 288 NA18552 | [2515685 chr9  | 9  | 41144937  | 41277884  | 132948 | 241  | -0.278865 | 0.012727 | 41144706  | 41145169  | 41277725  | 4127804  |
| 289 NA18552 | [2515685 chr9  | 9  | 41649237  | 41650704  | 1468   | 2    | -0.714484 | 0.13941  | 41648318  | 41650157  | 41650553  | 4165085  |
| 290 NA18552 | [2515685 chr9  | 9  | 42754727  | 42756705  | 1979   | 3    | -0.70982  | 0.113828 | 42754385  | 42755070  | 42755767  | 4275764  |
| 291 NA18552 | [2515685 chr9  | 9  | 42875403  | 42877381  | 1979   | 3    | -0.70982  | 0.113828 | 42875061  | 42875746  | 42876443  | 4287832  |
| 292 NA18552 | [2515685 chr9  | 9  | 43059964  | 43066832  | 6869   | 15   | -0.388059 | 0.050905 | 43059908  | 43060020  | 43066646  | 4306701  |
| 293 NA18552 | [2515685 chr9  | 9  | 43108218  | 43117947  | 9730   | 22   | -0.404878 | 0.042034 | 43108056  | 43108380  | 43117638  | 4311825  |
| 294 NA18552 | [2515685 chr9  | 9  | 44389967  | 44403202  | 13236  | 8    | 0.491641  | 0.069705 | 44389400  | 44390534  | 44402892  | 4440351  |
| 295 NA18552 | [2515685 chr9  | 9  | 45378712  | 45392634  | 13923  | 8    | 0.418382  | 0.069705 | 45378536  | 45378889  | 45391922  | 4539334  |
| 296 NA18552 | [2515685 chr9  | 9  | 45441271  | 45456401  | 15131  | 13   | 0.279213  | 0.054681 | 45440324  | 45442218  | 45455127  | 4545767  |
| 297 NA18552 | [2515685 chr9  | 9  | 45591290  | 45618765  | 27476  | 6    | -0.483233 | 0.080488 | 45589224  | 45593357  | 45617464  | 4562006  |
| 298 NA18552 | [2515685 chr9  | 9  | 65007765  | 65012118  | 4354   | 7    | -0.393738 | 0.074518 | 65007266  | 65008264  | 65011931  | 6501230  |
| 299 NA18552 | [2515685 chr9  | 9  | 65957375  | 66149446  | 192072 | 318  | -0.272429 | 0.011088 | 65957144  | 65957607  | 66149353  | 6614953  |
| 300 NA18552 | [2515685 chr9  | 9  | 67357659  | 67378839  | 21181  | 9    | -0.434254 | 0.065719 | 67355740  | 67359579  | 67378627  | 6737905  |
| 301 NA18552 | [2515685 chr9  | 9  | 80878260  | 80879919  | 1660   | 2    | 0.715772  | 0.13941  | 80877780  | 80878740  | 80879539  | 8088029  |
| 302 NA18552 | [2515685 chr9  | 9  | 89405187  | 89407924  | 2738   | 2    | -0.891347 | 0.13941  | 89404572  | 89405803  | 89407164  | 8940868  |
| 303 NA18552 | [2515685 chr9  | 9  | 101790936 | 101804576 | 13641  | 10   | -0.610412 | 0.065645 | 101789706 | 101792166 | 101803113 | 10180603 |
| 304 NA18552 | [2515685 chr9  | 9  | 112590519 | 112592932 | 2414   | 2    | 0.748009  | 0.13941  | 112589954 | 112591085 | 112591990 | 11259387 |
| 305 NA18552 | [2515685 chr9  | 9  | 112902065 | 112933534 | 31470  | 43   | 0.696969  | 0.030061 | 112901557 | 112902574 | 112932917 | 11293415 |
| 306 NA18552 | [2515685 chr9  | 9  | 135438420 | 135444067 | 5648   | 2    | 2.487743  | 0.150859 | 135383632 | 135440781 | 135443016 | 13544511 |
| 307 NA18552 | [2515685 chr10 | 10 | 170571    | 172369    | 1799   | 2    | 0.851514  | 0.13941  | 170341    | 170801    | 171237    | 173501   |
| 308 NA18552 | [2515685 chr10 | 10 | 6693908   | 6703893   | 9986   | 8    | 0.772877  | 0.070015 | 6692231   | 6695585   | 6703779   | 6704008  |
| 309 NA18552 | [2515685 chr10 | 10 | 19804859  | 19807915  | 3057   | 3    | 0.579819  | 0.113828 | 19804479  | 19805239  | 19807504  | 1980832  |
| 310 NA18552 | [2515685 chr10 | 10 | 20036833  | 20038315  | 1483   | 2    | -1.929304 | 0.145617 | 20036464  | 20037202  | 20038007  | 2003862  |
| 311 NA18552 | [2515685 chr10 | 10 | 37486514  | 37527174  | 40661  | 62   | -0.635545 | 0.025067 | 37486043  | 37486985  | 37526783  | 3752756  |
| 312 NA18552 | [2515685 chr10 | 10 | 42564252  | 42565662  | 1411   | 4    | -0.559559 | 0.098578 | 42563949  | 42564556  | 42565423  | 4256590  |
| 313 NA18552 | [2515685 chr10 | 10 | 45629221  | 45639867  | 10647  | 13   | -0.320446 | 0.054681 | 45629059  | 45629383  | 45639040  | 4564069  |
| 314 NA18552 | [2515685 chr10 | 10 | 46027310  | 46029863  | 2554   | 7    | 0.432248  | 0.074518 | 46026904  | 46027717  | 46029744  | 4602998  |
| 315 NA18552 | [2515685 chr10 | 10 | 46182371  | 47176381  | 994011 | 1462 | -0.328671 | 0.005157 | 46182194  | 46182549  | 47175283  | 4717747  |
| 316 NA18552 | [2515685 chr10 | 10 | 47214619  | 47237545  | 22927  | 77   | -0.401861 | 0.022468 | 47214565  | 47214674  | 47237269  | 4723782  |
| 317 NA18552 | [2515685 chr10 | 10 | 47758631  | 47806251  | 47621  | 122  | -0.329891 | 0.017851 | 47758424  | 47758839  | 47806074  | 4780642  |
| 318 NA18552 | [2515685 chr10 | 10 | 47875692  | 47895873  | 20182  | 63   | -0.401135 | 0.024839 | 47875572  | 47875813  | 47895597  | 4789614  |
| 319 NA18552 | [2515685 chr10 | 10 | 48414234  | 48417066  | 2833   | 6    | 0.437263  | 0.080488 | 48413828  | 48414641  | 48416668  | 4841746  |
| 320 NA18552 | [2515685 chr10 | 10 | 48572137  | 48706944  | 134808 | 273  | -0.300368 | 0.011932 | 48571961  | 48572314  | 48706445  | 4870744  |
| 321 NA18552 | [2515685 chr10 | 10 | 48984793  | 48987579  | 2787   | 6    | 0.474115  | 0.080488 | 48984432  | 48985154  | 48987181  | 4898797  |
| 322 NA18552 | [2515685 chr10 | 10 | 49055849  | 49059359  | 3511   | 8    | -0.39223  | 0.069705 | 49055651  | 49056048  | 49059140  | 4905957  |
| 323 NA18552 | [2515685 chr10 | 10 | 51998898  | 52015981  | 17084  | 16   | 0.254228  | 0.049289 | 51998265  | 51999532  | 52015679  | 5201628  |
| 324 NA18552 | [2515685 chr10 | 10 | 52087280  | 52119235  | 31956  | 18   | -0.261685 | 0.04647  | 52086668  | 52087892  | 52117404  | 5212106  |
| 325 NA18552 | [2515685 chr10 | 10 | 55112552  | 55116963  | 4412   | 3    | 0.606723  | 0.114273 | 55112120  | 55112985  | 55116041  | 5511788  |
| 326 NA18552 | [2515685 chr10 | 10 | 56117212  | 56139275  | 22064  | 20   | -0.937113 | 0.044234 | 56115764  | 56118661  | 56138931  | 5613961  |

|             |                |    |           |           |        |     |           |          |           |           |           |          |
|-------------|----------------|----|-----------|-----------|--------|-----|-----------|----------|-----------|-----------|-----------|----------|
| 327 NA18552 | [2515685 chr10 | 10 | 68157530  | 68179211  | 21682  | 15  | 0.261195  | 0.050905 | 68157292  | 68157769  | 68176992  | 68181437 |
| 328 NA18552 | [2515685 chr10 | 10 | 70951158  | 70961194  | 10037  | 7   | -0.719595 | 0.074518 | 70949290  | 70953027  | 70960964  | 70961421 |
| 329 NA18552 | [2515685 chr10 | 10 | 81139903  | 81173619  | 33717  | 32  | -0.476431 | 0.034853 | 81139825  | 81139981  | 81171386  | 81175851 |
| 330 NA18552 | [2515685 chr10 | 10 | 81460101  | 81493795  | 33695  | 30  | -0.452449 | 0.035996 | 81460023  | 81460179  | 81491562  | 81496501 |
| 331 NA18552 | [2515685 chr10 | 10 | 88760923  | 88774873  | 13951  | 17  | -0.323004 | 0.047817 | 88759795  | 88762052  | 88774243  | 88775602 |
| 332 NA18552 | [2515685 chr10 | 10 | 88861693  | 89016296  | 154604 | 189 | -0.27874  | 0.014341 | 88859433  | 88863954  | 89014572  | 89018027 |
| 333 NA18552 | [2515685 chr10 | 10 | 89226862  | 89249206  | 22345  | 25  | -0.421377 | 0.039431 | 89226229  | 89227496  | 89248977  | 89249431 |
| 334 NA18552 | [2515685 chr10 | 10 | 124336365 | 124341749 | 5385   | 6   | 0.805639  | 0.080488 | 124335581 | 124337149 | 124341238 | 12434226 |
| 335 NA18552 | [2515685 chr10 | 10 | 124349666 | 124366738 | 17073  | 22  | -0.600896 | 0.042034 | 124349302 | 124350031 | 124366300 | 12436717 |
| 336 NA18552 | [2515685 chr10 | 10 | 133578753 | 133584218 | 5466   | 14  | -0.352634 | 0.052692 | 133578545 | 133578962 | 133583877 | 13358456 |
| 337 NA18552 | [2515685 chr10 | 10 | 134813662 | 134816190 | 2529   | 3   | -0.661848 | 0.113828 | 134813181 | 134814143 | 134815683 | 13481669 |
| 338 NA18552 | [2515685 chr10 | 10 | 135179346 | 135183528 | 4183   | 23  | 0.340121  | 0.041111 | 135178919 | 135179774 | 135183320 | 13518373 |
| 339 NA18552 | [2515685 chr11 | 11 | 2840307   | 2842410   | 2104   | 3   | 1.104976  | 0.122332 | 2839959   | 2840656   | 2841856   | 2842965  |
| 340 NA18552 | [2515685 chr11 | 11 | 3628748   | 3632795   | 4048   | 6   | -2.538763 | 0.089529 | 3625722   | 3631775   | 3632594   | 3632996  |
| 341 NA18552 | [2515685 chr11 | 11 | 4924115   | 4932599   | 8485   | 9   | 0.677799  | 0.065719 | 4923827   | 4924403   | 4931948   | 4933257  |
| 342 NA18552 | [2515685 chr11 | 11 | 5717038   | 5718491   | 1454   | 2   | 2.24562   | 0.196708 | 5716660   | 5717416   | 5718038   | 5718945  |
| 343 NA18552 | [2515685 chr11 | 11 | 5741269   | 5765093   | 23825  | 29  | 1.306061  | 0.044544 | 5741059   | 5741480   | 5745555   | 5765632  |
| 344 NA18552 | [2515685 chr11 | 11 | 10224775  | 10229788  | 5014   | 5   | 0.54378   | 0.104147 | 10219961  | 10227860  | 10227972  | 10231601 |
| 345 NA18552 | [2515685 chr11 | 11 | 11831868  | 11833089  | 1222   | 2   | 0.929829  | 0.161236 | 11831412  | 11832324  | 11832853  | 11833321 |
| 346 NA18552 | [2515685 chr11 | 11 | 18906905  | 18923024  | 16120  | 29  | 0.753984  | 0.036994 | 18906533  | 18907278  | 18919939  | 18928457 |
| 347 NA18552 | [2515685 chr11 | 11 | 28965605  | 28968367  | 2763   | 3   | 3.334209  | 0.171627 | 28965284  | 28965927  | 28967064  | 28969671 |
| 348 NA18552 | [2515685 chr11 | 11 | 48284073  | 48284771  | 699    | 2   | 0.699366  | 0.13941  | 48283862  | 48284285  | 48284572  | 48284971 |
| 349 NA18552 | [2515685 chr11 | 11 | 48859298  | 48862876  | 3579   | 17  | -0.2592   | 0.047817 | 48859089  | 48859508  | 48862853  | 48862891 |
| 350 NA18552 | [2515685 chr11 | 11 | 48873806  | 48877382  | 3577   | 18  | -0.250333 | 0.04647  | 48873783  | 48873829  | 48877173  | 48877591 |
| 351 NA18552 | [2515685 chr11 | 11 | 48996630  | 49001951  | 5322   | 11  | 0.34399   | 0.061095 | 48996501  | 48996760  | 49001459  | 49002447 |
| 352 NA18552 | [2515685 chr11 | 11 | 49665830  | 49715833  | 50004  | 36  | 0.549934  | 0.033112 | 49665251  | 49666410  | 49712748  | 49721981 |
| 353 NA18552 | [2515685 chr11 | 11 | 55124643  | 55212653  | 88011  | 98  | -0.681824 | 0.020439 | 55124460  | 55124827  | 55209568  | 55215751 |
| 354 NA18552 | [2515685 chr11 | 11 | 58563615  | 58611261  | 47647  | 48  | 0.326989  | 0.028481 | 58561003  | 58566228  | 58610975  | 58611547 |
| 355 NA18552 | [2515685 chr11 | 11 | 60719680  | 60766237  | 46558  | 61  | 0.479017  | 0.025243 | 60719249  | 60720112  | 60765965  | 60766511 |
| 356 NA18552 | [2515685 chr11 | 11 | 60771505  | 60777477  | 5973   | 8   | 0.358129  | 0.071052 | 60771230  | 60771781  | 60776810  | 60778141 |
| 357 NA18552 | [2515685 chr11 | 11 | 60808172  | 60819905  | 11734  | 13  | -0.2933   | 0.054681 | 60806986  | 60809359  | 60819593  | 60820217 |
| 358 NA18552 | [2515685 chr11 | 11 | 71211511  | 71227315  | 15805  | 21  | -0.307065 | 0.043023 | 71211104  | 71211919  | 71226862  | 71227761 |
| 359 NA18552 | [2515685 chr11 | 11 | 85981700  | 85984113  | 2414   | 3   | -0.572749 | 0.113828 | 85981147  | 85982254  | 85983791  | 85984431 |
| 360 NA18552 | [2515685 chr11 | 11 | 88266938  | 88303948  | 37011  | 40  | 0.353052  | 0.031964 | 88266424  | 88267453  | 88303762  | 88304131 |
| 361 NA18552 | [2515685 chr11 | 11 | 89184898  | 89189792  | 4895   | 5   | 0.622234  | 0.098192 | 89184243  | 89185554  | 89189177  | 89190407 |
| 362 NA18552 | [2515685 chr11 | 11 | 93334621  | 93341944  | 7324   | 8   | -0.802929 | 0.069771 | 93334320  | 93334923  | 93341681  | 93342207 |
| 363 NA18552 | [2515685 chr11 | 11 | 134107699 | 134110673 | 2975   | 3   | 0.746551  | 0.113828 | 134106591 | 134108808 | 134109982 | 13411136 |
| 364 NA18552 | [2515685 chr12 | 12 | 398598    | 404873    | 6276   | 14  | -0.509056 | 0.052692 | 398035    | 399161    | 401600    | 408146   |
| 365 NA18552 | [2515685 chr12 | 12 | 736840    | 744802    | 7963   | 9   | 0.745768  | 0.065719 | 736616    | 737064    | 744211    | 745394   |
| 366 NA18552 | [2515685 chr12 | 12 | 2108401   | 2127044   | 18644  | 16  | 0.56252   | 0.049289 | 2107696   | 2109107   | 2126809   | 2127275  |
| 367 NA18552 | [2515685 chr12 | 12 | 8235890   | 8271843   | 35954  | 48  | -0.443648 | 0.028457 | 8233704   | 8238076   | 8271580   | 8272107  |
| 368 NA18552 | [2515685 chr12 | 12 | 8434390   | 8443687   | 9298   | 19  | -0.40301  | 0.045231 | 8433950   | 8434831   | 8442906   | 8444465  |
| 369 NA18552 | [2515685 chr12 | 12 | 9439936   | 9445623   | 5688   | 9   | 0.692788  | 0.065719 | 9439574   | 9440298   | 9445247   | 9446000  |
| 370 NA18552 | [2515685 chr12 | 12 | 9527659   | 9624971   | 97313  | 105 | 1.177793  | 0.020101 | 9526872   | 9528447   | 9623223   | 9626720  |
| 371 NA18552 | [2515685 chr12 | 12 | 11109398  | 11142012  | 32615  | 40  | -0.288517 | 0.031173 | 11109206  | 11109590  | 11141608  | 11142417 |
| 372 NA18552 | [2515685 chr12 | 12 | 30128711  | 30133561  | 4851   | 3   | -0.882851 | 0.113828 | 30128382  | 30129041  | 30132177  | 30134941 |
| 373 NA18552 | [2515685 chr12 | 12 | 31156172  | 31244780  | 88609  | 83  | 0.81281   | 0.021894 | 31155571  | 31156773  | 31244217  | 31245341 |
| 374 NA18552 | [2515685 chr12 | 12 | 34373586  | 34651194  | 277609 | 71  | -0.269595 | 0.023398 | 34322089  | 34377077  | 34649713  | 34652671 |
| 375 NA18552 | [2515685 chr12 | 12 | 36209453  | 36224930  | 15478  | 16  | -0.35466  | 0.049289 | 36200442  | 36212944  | 36224755  | 36225101 |
| 376 NA18552 | [2515685 chr12 | 12 | 39191284  | 39205565  | 14282  | 3   | 0.608862  | 0.113828 | 39190361  | 39192208  | 39202074  | 39237481 |
| 377 NA18552 | [2515685 chr12 | 12 | 62225908  | 62347337  | 121430 | 98  | 0.255321  | 0.019927 | 62225477  | 62226339  | 62347043  | 62347637 |
| 378 NA18552 | [2515685 chr12 | 12 | 69156921  | 69163366  | 6446   | 9   | -2.767398 | 0.09738  | 69138649  | 69160412  | 69162690  | 69164041 |
| 379 NA18552 | [2515685 chr12 | 12 | 69163366  | 69167887  | 4522   | 2   | -1.202492 | 0.173061 | 69162690  | 69164042  | 69164396  | 69215017 |
| 380 NA18552 | [2515685 chr12 | 12 | 105648419 | 105869230 | 220812 | 12  | 0.291421  | 0.056914 | 105521700 | 105651910 | 105868864 | 10586959 |
| 381 NA18552 | [2515685 chr12 | 12 | 128864324 | 128869047 | 4724   | 14  | -0.374969 | 0.052692 | 128863938 | 128864711 | 128867605 | 12887048 |

|             |                |    |           |           |        |     |           |          |           |           |           |           |
|-------------|----------------|----|-----------|-----------|--------|-----|-----------|----------|-----------|-----------|-----------|-----------|
| 382 NA18552 | [2515685 chr12 | 12 | 129395501 | 129398622 | 3122   | 15  | -0.34509  | 0.050905 | 129395008 | 129395994 | 129397827 | 12939941  |
| 383 NA18552 | [2515685 chr13 | 13 | 18217217  | 18283441  | 66225  | 28  | -0.36682  | 0.037259 | 18217031  | 18217404  | 18282592  | 18284291  |
| 384 NA18552 | [2515685 chr13 | 13 | 36971484  | 36983475  | 11992  | 10  | -0.65056  | 0.06309  | 36969416  | 36973552  | 36982905  | 36984041  |
| 385 NA18552 | [2515685 chr13 | 13 | 69633905  | 69673289  | 39385  | 42  | 0.769074  | 0.031209 | 69633412  | 69634399  | 69672985  | 69673591  |
| 386 NA18552 | [2515685 chr13 | 13 | 110502383 | 110503129 | 747    | 3   | -0.832131 | 0.113828 | 110502225 | 110502541 | 110502890 | 11050336  |
| 387 NA18552 | [2515685 chr14 | 14 | 18435964  | 18823237  | 387274 | 623 | -0.318978 | 0.004933 | 18435807  | 18436121  | 18823059  | 18823411  |
| 388 NA18552 | [2515685 chr14 | 14 | 18851276  | 19494842  | 643567 | 932 | -0.318978 | 0.004933 | 18850824  | 18851728  | 19494444  | 19495241  |
| 389 NA18552 | [2515685 chr14 | 14 | 21953267  | 21966678  | 13412  | 18  | 0.284138  | 0.04647  | 21952934  | 21953600  | 21966458  | 21966891  |
| 390 NA18552 | [2515685 chr14 | 14 | 32022775  | 32026140  | 3366   | 2   | -0.961046 | 0.13941  | 32022274  | 32023276  | 32023749  | 32028531  |
| 391 NA18552 | [2515685 chr14 | 14 | 43571343  | 43602213  | 30871  | 26  | -0.702855 | 0.039674 | 43571042  | 43571644  | 43598358  | 43606061  |
| 392 NA18552 | [2515685 chr14 | 14 | 45140966  | 45146022  | 5057   | 5   | 0.471684  | 0.088171 | 45139773  | 45142159  | 45144564  | 45147481  |
| 393 NA18552 | [2515685 chr14 | 14 | 59539644  | 59548439  | 8796   | 10  | 0.372417  | 0.062346 | 59539381  | 59539908  | 59548016  | 59548861  |
| 394 NA18552 | [2515685 chr14 | 14 | 73070288  | 73075916  | 5629   | 6   | -0.808757 | 0.083727 | 73068747  | 73071829  | 73075495  | 73076331  |
| 395 NA18552 | [2515685 chr14 | 14 | 73078488  | 73089743  | 11256  | 11  | -0.321091 | 0.061995 | 73078161  | 73078815  | 73089439  | 73090041  |
| 396 NA18552 | [2515685 chr14 | 14 | 73094977  | 73114867  | 19891  | 15  | 0.333626  | 0.050905 | 73094620  | 73095334  | 73114648  | 73115081  |
| 397 NA18552 | [2515685 chr14 | 14 | 104766812 | 104778505 | 11694  | 145 | 0.26829   | 0.01637  | 104766457 | 104767167 | 104778286 | 104778721 |
| 398 NA18552 | [2515685 chr15 | 15 | 18906667  | 18909258  | 2592   | 5   | -0.514549 | 0.088171 | 18906373  | 18906961  | 18909066  | 18909451  |
| 399 NA18552 | [2515685 chr15 | 15 | 18924027  | 18925225  | 1199   | 5   | -0.501233 | 0.088171 | 18923575  | 18924480  | 18924957  | 18925491  |
| 400 NA18552 | [2515685 chr15 | 15 | 19044450  | 19090214  | 45765  | 52  | -0.2899   | 0.027341 | 19044412  | 19044489  | 19090043  | 19090381  |
| 401 NA18552 | [2515685 chr15 | 15 | 19795268  | 19809806  | 14539  | 25  | -0.258545 | 0.039604 | 19795095  | 19795441  | 19807597  | 19812011  |
| 402 NA18552 | [2515685 chr15 | 15 | 20371603  | 20385080  | 13478  | 18  | -0.254414 | 0.04647  | 20367922  | 20373912  | 20384584  | 20385571  |
| 403 NA18552 | [2515685 chr15 | 15 | 20865501  | 20868097  | 2597   | 5   | -0.519859 | 0.088171 | 20865204  | 20865798  | 20867905  | 20868291  |
| 404 NA18552 | [2515685 chr15 | 15 | 20882855  | 20884053  | 1199   | 5   | -0.501233 | 0.088171 | 20882403  | 20883308  | 20883785  | 20884321  |
| 405 NA18552 | [2515685 chr15 | 15 | 21004402  | 21049779  | 45378  | 45  | -0.282178 | 0.02939  | 21003665  | 21005140  | 21049217  | 21050341  |
| 406 NA18552 | [2515685 chr15 | 15 | 21605983  | 21614607  | 8625   | 8   | 0.645932  | 0.076155 | 21605507  | 21606459  | 21612298  | 21636691  |
| 407 NA18552 | [2515685 chr15 | 15 | 24986053  | 24992250  | 6198   | 7   | 0.781196  | 0.075293 | 24985426  | 24986680  | 24991680  | 24992821  |
| 408 NA18552 | [2515685 chr15 | 15 | 26135294  | 26137335  | 2042   | 4   | -0.551204 | 0.098578 | 26134997  | 26135591  | 26137216  | 26137451  |
| 409 NA18552 | [2515685 chr15 | 15 | 26679206  | 26680358  | 1153   | 4   | -0.500623 | 0.098578 | 26678984  | 26679429  | 26679905  | 26680811  |
| 410 NA18552 | [2515685 chr15 | 15 | 26695119  | 26697710  | 2592   | 5   | -0.506248 | 0.088171 | 26694927  | 26695312  | 26697414  | 26698001  |
| 411 NA18552 | [2515685 chr15 | 15 | 26700617  | 26702032  | 1416   | 5   | -0.458614 | 0.088784 | 26700567  | 26700667  | 26701748  | 26702311  |
| 412 NA18552 | [2515685 chr15 | 15 | 28177626  | 28184037  | 6412   | 11  | -0.297781 | 0.059445 | 28177335  | 28177917  | 28183447  | 28184621  |
| 413 NA18552 | [2515685 chr15 | 15 | 30296241  | 30304780  | 8540   | 5   | -0.91634  | 0.088818 | 30295664  | 30296819  | 30302471  | 30308721  |
| 414 NA18552 | [2515685 chr15 | 15 | 32504316  | 32507409  | 3094   | 3   | 0.594313  | 0.113828 | 32503998  | 32504634  | 32506908  | 32507911  |
| 415 NA18552 | [2515685 chr15 | 15 | 32515477  | 32592621  | 77145  | 63  | 0.505618  | 0.025314 | 32514954  | 32516000  | 32592260  | 32592981  |
| 416 NA18552 | [2515685 chr15 | 15 | 32615681  | 32630411  | 14731  | 17  | 0.277696  | 0.047817 | 32615284  | 32616079  | 32629481  | 32631341  |
| 417 NA18552 | [2515685 chr15 | 15 | 43106834  | 43111174  | 4341   | 5   | 0.488413  | 0.088171 | 43106498  | 43107171  | 43111071  | 43111271  |
| 418 NA18552 | [2515685 chr15 | 15 | 75117585  | 75119946  | 2362   | 4   | -1.368963 | 0.132272 | 75117343  | 75117827  | 75119741  | 75120151  |
| 419 NA18552 | [2515685 chr15 | 15 | 80432944  | 80438640  | 5697   | 16  | 0.286892  | 0.049289 | 80432697  | 80433191  | 80438577  | 80438701  |
| 420 NA18552 | [2515685 chr15 | 15 | 80743159  | 80764909  | 21751  | 20  | 0.313082  | 0.044085 | 80743085  | 80743234  | 80762600  | 80768311  |
| 421 NA18552 | [2515685 chr15 | 15 | 80822159  | 80825133  | 2975   | 10  | 0.357541  | 0.062346 | 80822085  | 80822234  | 80825070  | 80825191  |
| 422 NA18552 | [2515685 chr15 | 15 | 80974870  | 80978674  | 3805   | 9   | 0.365889  | 0.065719 | 80973972  | 80975769  | 80978600  | 80978741  |
| 423 NA18552 | [2515685 chr15 | 15 | 82333041  | 82335194  | 2154   | 2   | -0.781374 | 0.13941  | 82332284  | 82333799  | 82337429  | 82335661  |
| 424 NA18552 | [2515685 chr15 | 15 | 82667005  | 82691307  | 24303  | 27  | 0.280538  | 0.037943 | 82663626  | 82669314  | 82691060  | 82691551  |
| 425 NA18552 | [2515685 chr15 | 15 | 83556095  | 83580413  | 24319  | 26  | 0.3187    | 0.038665 | 83552703  | 83558404  | 83580171  | 83580651  |
| 426 NA18552 | [2515685 chr15 | 15 | 100090726 | 100098359 | 7634   | 3   | 0.608302  | 0.116046 | 100090390 | 100091062 | 100096050 | 100102351 |
| 427 NA18552 | [2515685 chr15 | 15 | 100110023 | 100122682 | 12660  | 46  | 1.025972  | 0.029056 | 100108905 | 100111141 | 100122315 | 100123051 |
| 428 NA18552 | [2515685 chr15 | 15 | 100274621 | 100306935 | 32315  | 14  | 0.271906  | 0.052692 | 100269190 | 100276930 | 100306372 | 100307491 |
| 429 NA18552 | [2515685 chr16 | 16 | 2120888   | 2126876   | 5989   | 6   | -0.496449 | 0.080488 | 2118476   | 2122769   | 2125012   | 2128741   |
| 430 NA18552 | [2515685 chr16 | 16 | 5287117   | 5290632   | 3516   | 2   | 1.039366  | 0.15148  | 5286149   | 5288085   | 5288751   | 5293271   |
| 431 NA18552 | [2515685 chr16 | 16 | 12617797  | 12618552  | 756    | 2   | 0.801342  | 0.140615 | 12617545  | 12618049  | 12618411  | 12618691  |
| 432 NA18552 | [2515685 chr16 | 16 | 14694328  | 14707381  | 13054  | 11  | -0.372242 | 0.059445 | 14693859  | 14694798  | 14706351  | 14708411  |
| 433 NA18552 | [2515685 chr16 | 16 | 14733448  | 14746503  | 13056  | 11  | -0.372243 | 0.059445 | 14732976  | 14733921  | 14745473  | 14747531  |
| 434 NA18552 | [2515685 chr16 | 16 | 14913066  | 14914896  | 1831   | 6   | -0.491209 | 0.080488 | 14912404  | 14913728  | 14914670  | 14915121  |
| 435 NA18552 | [2515685 chr16 | 16 | 15154075  | 15157215  | 3141   | 6   | -0.494132 | 0.080488 | 15153850  | 15154301  | 15156426  | 15158001  |
| 436 NA18552 | [2515685 chr16 | 16 | 16311721  | 16313551  | 1831   | 6   | -0.491209 | 0.080488 | 16311059  | 16312384  | 16313326  | 16313771  |

|             |                |    |          |          |        |     |           |          |          |          |          |          |
|-------------|----------------|----|----------|----------|--------|-----|-----------|----------|----------|----------|----------|----------|
| 437 NA18552 | [2515685 chr16 | 16 | 16633469 | 16639120 | 5652   | 4   | 0.544734  | 0.098578 | 16632502 | 16634437 | 16638386 | 1663985- |
| 438 NA18552 | [2515685 chr16 | 16 | 18401309 | 18403139 | 1831   | 6   | -0.491208 | 0.080488 | 18401084 | 18401535 | 18402477 | 1840380- |
| 439 NA18552 | [2515685 chr16 | 16 | 21321436 | 21323686 | 2251   | 13  | 0.434025  | 0.054681 | 21321333 | 21321540 | 21323533 | 2132383- |
| 440 NA18552 | [2515685 chr16 | 16 | 21480136 | 21489096 | 8961   | 9   | 0.464886  | 0.065719 | 21479907 | 21480366 | 21488557 | 2148963- |
| 441 NA18552 | [2515685 chr16 | 16 | 21753870 | 21756137 | 2268   | 15  | 0.441748  | 0.050905 | 21753767 | 21753974 | 21755984 | 2175629- |
| 442 NA18552 | [2515685 chr16 | 16 | 21780748 | 21781441 | 694    | 3   | 0.594213  | 0.113828 | 21780451 | 21781046 | 21781253 | 2178163- |
| 443 NA18552 | [2515685 chr16 | 16 | 22452875 | 22454874 | 2000   | 13  | 0.440839  | 0.054681 | 22452722 | 22453028 | 22454771 | 2245497- |
| 444 NA18552 | [2515685 chr16 | 16 | 22520654 | 22623354 | 102701 | 88  | 0.318701  | 0.021034 | 22519883 | 22521425 | 22622993 | 2262371- |
| 445 NA18552 | [2515685 chr16 | 16 | 28282839 | 28367545 | 84707  | 126 | -0.298738 | 0.017575 | 28281962 | 28283717 | 28366478 | 2836861- |
| 446 NA18552 | [2515685 chr16 | 16 | 28608439 | 28670097 | 61659  | 101 | -0.321334 | 0.019632 | 28608417 | 28608462 | 28669220 | 2867097- |
| 447 NA18552 | [2515685 chr16 | 16 | 29300574 | 29302684 | 2111   | 11  | 0.415369  | 0.059445 | 29300408 | 29300741 | 29302391 | 2930297- |
| 448 NA18552 | [2515685 chr16 | 16 | 29354436 | 29356009 | 1574   | 5   | 0.463195  | 0.088171 | 29354394 | 29354479 | 29355377 | 2935664- |
| 449 NA18552 | [2515685 chr16 | 16 | 29402841 | 29404254 | 1414   | 9   | 0.432243  | 0.065719 | 29402738 | 29402945 | 29404073 | 2940443- |
| 450 NA18552 | [2515685 chr16 | 16 | 30142181 | 30144224 | 2044   | 14  | 0.437746  | 0.052692 | 30142078 | 30142285 | 30144043 | 3014440- |
| 451 NA18552 | [2515685 chr16 | 16 | 32073573 | 32075147 | 1575   | 4   | -0.61229  | 0.098578 | 32073268 | 32073879 | 32074517 | 3207577- |
| 452 NA18552 | [2515685 chr16 | 16 | 32159898 | 32160377 | 480    | 2   | -1.77874  | 0.142548 | 32159453 | 32160343 | 32160346 | 3216040- |
| 453 NA18552 | [2515685 chr16 | 16 | 32160560 | 32213712 | 53153  | 104 | -0.313883 | 0.019333 | 32160408 | 32160712 | 32213463 | 3221396- |
| 454 NA18552 | [2515685 chr16 | 16 | 32519395 | 32606509 | 87115  | 168 | -0.296037 | 0.015247 | 32518693 | 32520098 | 32606358 | 3260666- |
| 455 NA18552 | [2515685 chr16 | 16 | 32606692 | 32607163 | 472    | 2   | -1.77874  | 0.142548 | 32606661 | 32606724 | 32606727 | 3260759- |
| 456 NA18552 | [2515685 chr16 | 16 | 32690003 | 32691563 | 1561   | 4   | -0.612291 | 0.098578 | 32689373 | 32690634 | 32691272 | 3269185- |
| 457 NA18552 | [2515685 chr16 | 16 | 32835037 | 32861812 | 26776  | 58  | -0.307222 | 0.025888 | 32834802 | 32835272 | 32861366 | 3286225- |
| 458 NA18552 | [2515685 chr16 | 16 | 33016481 | 33018043 | 1563   | 4   | -0.612291 | 0.098578 | 33016187 | 33016775 | 33017413 | 3301867- |
| 459 NA18552 | [2515685 chr16 | 16 | 33092915 | 33219046 | 126132 | 279 | -0.320232 | 0.011807 | 33092688 | 33093142 | 33217165 | 3322356- |
| 460 NA18552 | [2515685 chr16 | 16 | 33334037 | 33406324 | 72288  | 87  | -0.290748 | 0.021165 | 33333512 | 33334563 | 33405980 | 3340666- |
| 461 NA18552 | [2515685 chr16 | 16 | 33504859 | 33539269 | 34411  | 42  | -0.386454 | 0.030781 | 33504466 | 33505252 | 33539020 | 3353951- |
| 462 NA18552 | [2515685 chr16 | 16 | 33633592 | 33647651 | 14060  | 29  | -0.361868 | 0.036611 | 33633157 | 33634028 | 33647418 | 3364788- |
| 463 NA18552 | [2515685 chr16 | 16 | 34313339 | 34606125 | 292787 | 325 | -0.463039 | 0.011065 | 34313085 | 34313594 | 34605058 | 3460719- |
| 464 NA18552 | [2515685 chr16 | 16 | 57204541 | 57207585 | 3045   | 3   | 3.046511  | 0.151763 | 57204170 | 57204913 | 57206938 | 5720823- |
| 465 NA18552 | [2515685 chr16 | 16 | 68534746 | 68564761 | 30016  | 47  | -0.329676 | 0.028758 | 68534434 | 68535058 | 68563823 | 6856570- |
| 466 NA18552 | [2515685 chr16 | 16 | 68703515 | 68791353 | 87839  | 121 | -0.430581 | 0.017923 | 68702955 | 68704076 | 68789873 | 6879283- |
| 467 NA18552 | [2515685 chr16 | 16 | 72918987 | 73022174 | 103188 | 154 | -0.297568 | 0.015887 | 72918157 | 72919818 | 73021701 | 7302264- |
| 468 NA18552 | [2515685 chr16 | 16 | 76932229 | 76942282 | 10054  | 8   | 0.581838  | 0.069705 | 76931263 | 76933196 | 76941602 | 7694296- |
| 469 NA18552 | [2515685 chr16 | 16 | 84562720 | 84565235 | 2516   | 11  | 0.724252  | 0.059445 | 84561685 | 84563756 | 84565142 | 8456532- |
| 470 NA18552 | [2515685 chr17 | 17 | 14984685 | 14999596 | 14912  | 15  | -0.696496 | 0.050905 | 14984106 | 14985264 | 14999318 | 1499987- |
| 471 NA18552 | [2515685 chr17 | 17 | 18297586 | 18311209 | 13624  | 22  | 0.28011   | 0.042034 | 18297407 | 18297765 | 18310937 | 1831148- |
| 472 NA18552 | [2515685 chr17 | 17 | 18331739 | 18332345 | 607    | 2   | -0.998292 | 0.13941  | 18331509 | 18331970 | 18331978 | 1833271- |
| 473 NA18552 | [2515685 chr17 | 17 | 19434989 | 19435957 | 969    | 2   | 0.904925  | 0.170043 | 19434778 | 19435200 | 19435581 | 1943633- |
| 474 NA18552 | [2515685 chr17 | 17 | 20299935 | 20300531 | 597    | 2   | -0.998292 | 0.13941  | 20299568 | 20300303 | 20300311 | 2030075- |
| 475 NA18552 | [2515685 chr17 | 17 | 21942186 | 21955530 | 13345  | 22  | -0.432398 | 0.042034 | 21941754 | 21942618 | 21955191 | 2195586- |
| 476 NA18552 | [2515685 chr17 | 17 | 31430406 | 31457488 | 27083  | 47  | 0.450756  | 0.028866 | 31429658 | 31431155 | 31457079 | 3145789- |
| 477 NA18552 | [2515685 chr17 | 17 | 31531920 | 31546168 | 14249  | 20  | 0.486564  | 0.024454 | 31531695 | 31532146 | 31545804 | 3154653- |
| 478 NA18552 | [2515685 chr17 | 17 | 31549342 | 31578624 | 29283  | 40  | 0.486564  | 0.024454 | 31548969 | 31549715 | 31578609 | 3157864- |
| 479 NA18552 | [2515685 chr17 | 17 | 31619971 | 31647743 | 27773  | 37  | 0.510873  | 0.025243 | 31619739 | 31620204 | 31647381 | 3164810- |
| 480 NA18552 | [2515685 chr17 | 17 | 31650913 | 31663546 | 12634  | 19  | 0.510873  | 0.025243 | 31650540 | 31651286 | 31663313 | 3166378- |
| 481 NA18552 | [2515685 chr17 | 17 | 32829500 | 32836899 | 7400   | 7   | 0.461167  | 0.074518 | 32828825 | 32830175 | 32836555 | 3283724- |
| 482 NA18552 | [2515685 chr17 | 17 | 33423761 | 33430793 | 7033   | 11  | -0.535926 | 0.059445 | 33422990 | 33424532 | 33428591 | 3352929- |
| 483 NA18552 | [2515685 chr17 | 17 | 33655637 | 33659558 | 3922   | 11  | -0.549032 | 0.059445 | 33655173 | 33656102 | 33658997 | 3366011- |
| 484 NA18552 | [2515685 chr17 | 17 | 36675530 | 36685343 | 9814   | 10  | -0.625503 | 0.063375 | 36675011 | 36676049 | 36684647 | 3668604- |
| 485 NA18552 | [2515685 chr17 | 17 | 40943910 | 40970558 | 26649  | 35  | 0.338974  | 0.033325 | 40943511 | 40944309 | 40970202 | 4097091- |
| 486 NA18552 | [2515685 chr17 | 17 | 41035524 | 41036525 | 1002   | 2   | 0.866269  | 0.13941  | 41035120 | 41035928 | 41035967 | 4103708- |
| 487 NA18552 | [2515685 chr17 | 17 | 41675037 | 41676708 | 1672   | 2   | 0.866269  | 0.13941  | 41673805 | 41676270 | 41676309 | 4167710- |
| 488 NA18552 | [2515685 chr17 | 17 | 41791035 | 41928466 | 137432 | 130 | 0.320187  | 0.017292 | 41790399 | 41791672 | 41927265 | 4192966- |
| 489 NA18552 | [2515685 chr17 | 17 | 42035370 | 42036410 | 1041   | 2   | 0.836076  | 0.13941  | 42035302 | 42035438 | 42035916 | 4203690- |
| 490 NA18552 | [2515685 chr17 | 17 | 42905976 | 42912650 | 6675   | 3   | 0.875231  | 0.133357 | 42905585 | 42906368 | 42911014 | 4291428- |
| 491 NA18552 | [2515685 chr17 | 17 | 42970703 | 42977236 | 6534   | 12  | -0.458922 | 0.056914 | 42970185 | 42971221 | 42976783 | 4297769- |

|             |                |    |          |          |         |     |           |          |          |          |          |          |
|-------------|----------------|----|----------|----------|---------|-----|-----------|----------|----------|----------|----------|----------|
| 492 NA18552 | [2515685 chr17 | 17 | 60282906 | 60309866 | 26961   | 36  | 0.309104  | 0.032859 | 60282477 | 60283336 | 60309366 | 60310367 |
| 493 NA18552 | [2515685 chr18 | 18 | 14244200 | 14326118 | 81919   | 27  | -0.447354 | 0.037943 | 14243872 | 14244529 | 14325709 | 14326527 |
| 494 NA18552 | [2515685 chr18 | 18 | 36514289 | 36521090 | 6802    | 6   | -0.69307  | 0.080576 | 36513759 | 36514820 | 36520512 | 36521669 |
| 495 NA18552 | [2515685 chr18 | 18 | 42745411 | 42893735 | 148325  | 25  | -0.398913 | 0.039431 | 42518691 | 42749992 | 42889154 | 43011507 |
| 496 NA18552 | [2515685 chr18 | 18 | 61917747 | 61919854 | 2108    | 3   | 1.466488  | 0.128865 | 61917522 | 61917973 | 61919012 | 61920697 |
| 497 NA18552 | [2515685 chr18 | 18 | 74373005 | 74380900 | 7896    | 11  | 0.300702  | 0.059445 | 74372064 | 74373947 | 74380208 | 74381597 |
| 498 NA18552 | [2515685 chr18 | 18 | 74392800 | 74397377 | 4578    | 3   | 0.846515  | 0.113828 | 74390826 | 74394774 | 74396965 | 74397796 |
| 499 NA18552 | [2515685 chr19 | 19 | 36860    | 61808    | 24949   | 11  | 0.363698  | 0.059445 | 35284    | 38436    | 61022    | 62595    |
| 500 NA18552 | [2515685 chr19 | 19 | 310414   | 312953   | 2540    | 14  | -0.509928 | 0.052692 | 309687   | 311142   | 312913   | 312994   |
| 501 NA18552 | [2515685 chr19 | 19 | 8708780  | 8762351  | 53572   | 92  | -0.510801 | 0.020555 | 8708296  | 8709264  | 8762083  | 8762626  |
| 502 NA18552 | [2515685 chr19 | 19 | 23007902 | 23013841 | 5940    | 6   | 0.907239  | 0.084728 | 22990964 | 23010431 | 23013525 | 23014157 |
| 503 NA18552 | [2515685 chr19 | 19 | 23108259 | 23109446 | 1188    | 2   | 1.403946  | 0.13941  | 23107903 | 23108615 | 23108879 | 23110017 |
| 504 NA18552 | [2515685 chr19 | 19 | 24152586 | 24155800 | 3215    | 19  | -0.399565 | 0.045231 | 24152557 | 24152616 | 24155376 | 24156227 |
| 505 NA18552 | [2515685 chr19 | 19 | 34310739 | 34323079 | 12341   | 6   | -0.432852 | 0.080488 | 34310203 | 34311275 | 34322762 | 34323391 |
| 506 NA18552 | [2515685 chr19 | 19 | 40352813 | 40355528 | 2716    | 3   | -0.762039 | 0.113828 | 40352601 | 40353026 | 40354648 | 40356409 |
| 507 NA18552 | [2515685 chr19 | 19 | 56881352 | 56903322 | 21971   | 25  | -0.271522 | 0.039431 | 56881124 | 56881580 | 56901393 | 56905257 |
| 508 NA18552 | [2515685 chr19 | 19 | 58210435 | 58243318 | 32884   | 25  | -0.705221 | 0.039429 | 58209863 | 58211007 | 58242744 | 58243897 |
| 509 NA18552 | [2515685 chr19 | 19 | 59245304 | 59252061 | 6758    | 7   | 0.445787  | 0.074518 | 59244993 | 59245616 | 59251854 | 59252267 |
| 510 NA18552 | [2515685 chr19 | 19 | 60958920 | 60976029 | 17110   | 15  | -0.442095 | 0.050905 | 60957933 | 60959907 | 60975748 | 60976316 |
| 511 NA18552 | [2515685 chr19 | 19 | 62680987 | 62689416 | 8430    | 7   | 0.557983  | 0.074992 | 62680661 | 62681314 | 62688947 | 62689887 |
| 512 NA18552 | [2515685 chr20 | 20 | 1483196  | 1511097  | 27902   | 29  | -0.282109 | 0.036611 | 1482985  | 1483408  | 1510534  | 1511666  |
| 513 NA18552 | [2515685 chr20 | 20 | 1511097  | 1532477  | 21381   | 26  | -2.097355 | 0.04779  | 1510534  | 1511660  | 1532182  | 1532777  |
| 514 NA18552 | [2515685 chr20 | 20 | 1533078  | 1544060  | 10983   | 16  | -0.393135 | 0.049289 | 1532773  | 1533384  | 1543588  | 1544533  |
| 515 NA18552 | [2515685 chr20 | 20 | 15249645 | 15251805 | 2161    | 2   | -0.881915 | 0.13941  | 15249381 | 15249909 | 15251287 | 15252327 |
| 516 NA18552 | [2515685 chr20 | 20 | 25781059 | 25799175 | 18117   | 14  | -0.31213  | 0.052692 | 25780369 | 25781750 | 25798661 | 25799687 |
| 517 NA18552 | [2515685 chr20 | 20 | 25900843 | 25927359 | 26517   | 22  | -0.263129 | 0.042034 | 25892188 | 25904253 | 25927111 | 25927607 |
| 518 NA18552 | [2515685 chr20 | 20 | 46550145 | 46555487 | 5343    | 4   | -0.515678 | 0.098578 | 46549463 | 46550827 | 46555447 | 46555527 |
| 519 NA18552 | [2515685 chr20 | 20 | 59979365 | 59980324 | 960     | 3   | 0.62832   | 0.113828 | 59979109 | 59979622 | 59979994 | 59980657 |
| 520 NA18552 | [2515685 chr20 | 20 | 61708204 | 61711805 | 3602    | 23  | -0.482286 | 0.04111  | 61707836 | 61708573 | 61711616 | 61711997 |
| 521 NA18552 | [2515685 chr20 | 20 | 62066380 | 62068214 | 1835    | 8   | 1.296651  | 0.069705 | 62066146 | 62066615 | 62067671 | 62068757 |
| 522 NA18552 | [2515685 chr21 | 21 | 10055028 | 10075391 | 20364   | 25  | 0.285744  | 0.039431 | 10054484 | 10055573 | 10075040 | 10075747 |
| 523 NA18552 | [2515685 chr21 | 21 | 14143702 | 14203866 | 60165   | 26  | -0.411773 | 0.038665 | 14142926 | 14144478 | 14203389 | 14204347 |
| 524 NA18552 | [2515685 chr21 | 21 | 22577433 | 22588071 | 10639   | 11  | -2.418707 | 0.082981 | 22577109 | 22577758 | 22587425 | 22588717 |
| 525 NA18552 | [2515685 chr22 | 22 | 14477274 | 14832930 | 355657  | 663 | -0.326534 | 0.007658 | 14475442 | 14479107 | 14831369 | 14834449 |
| 526 NA18552 | [2515685 chr22 | 22 | 17033411 | 17136014 | 102604  | 158 | -0.271603 | 0.015685 | 17032801 | 17034021 | 17135493 | 17136537 |
| 527 NA18552 | [2515685 chr22 | 22 | 17385504 | 17402646 | 17143   | 27  | -0.385229 | 0.037943 | 17385031 | 17385977 | 17402286 | 17403007 |
| 528 NA18552 | [2515685 chr22 | 22 | 18178327 | 18248589 | 70263   | 13  | -0.342972 | 0.054681 | 18177412 | 18179243 | 18247887 | 18249297 |
| 529 NA18552 | [2515685 chr22 | 22 | 18698885 | 19952782 | 1253898 | 683 | -0.278887 | 0.00593  | 18696181 | 18701563 | 19952473 | 19953097 |
| 530 NA18552 | [2515685 chr22 | 22 | 19970040 | 20240773 | 270734  | 396 | -0.278887 | 0.00593  | 19969841 | 19970239 | 20240586 | 20240967 |
| 531 NA18552 | [2515685 chr22 | 22 | 22616107 | 22658532 | 42426   | 81  | -0.300401 | 0.021935 | 22615805 | 22616410 | 22658034 | 22659037 |
| 532 NA18552 | [2515685 chr22 | 22 | 22672624 | 22691501 | 18878   | 17  | 0.706421  | 0.030573 | 22672391 | 22672858 | 22691088 | 22691917 |
| 533 NA18552 | [2515685 chr22 | 22 | 22695407 | 22705459 | 10053   | 11  | 0.706421  | 0.030573 | 22695112 | 22695703 | 22704883 | 22706037 |
| 534 NA18552 | [2515685 chr22 | 22 | 22709111 | 22715094 | 5984    | 8   | 0.706421  | 0.030573 | 22708662 | 22709561 | 22714777 | 22715417 |
| 535 NA18552 | [2515685 chr22 | 22 | 23751856 | 23757744 | 5889    | 6   | 0.436662  | 0.080488 | 23751223 | 23752490 | 23757501 | 23757987 |
| 536 NA18552 | [2515685 chr22 | 22 | 33619409 | 33622591 | 3183    | 4   | 0.844498  | 0.098578 | 33618939 | 33619879 | 33622541 | 33622647 |
| 537 NA18552 | [2515685 chr22 | 22 | 41145365 | 41152962 | 7598    | 11  | -0.327213 | 0.059445 | 41144977 | 41145754 | 41152615 | 41153307 |
| 1 NA18572   | [2515685 chr1  | 1  | 166386   | 167177   | 792     | 4   | -0.304568 | 0.059436 | 166125   | 166648   | 167132   | 167223   |
| 2 NA18572   | [2515685 chr1  | 1  | 392807   | 499758   | 106952  | 148 | -0.462622 | 0.008177 | 387955   | 396077   | 499532   | 499985   |
| 3 NA18572   | [2515685 chr1  | 1  | 563454   | 676609   | 113156  | 150 | -0.462622 | 0.008177 | 563228   | 563681   | 673339   | 681462   |
| 4 NA18572   | [2515685 chr1  | 1  | 752209   | 804306   | 52098   | 77  | 0.439282  | 0.010716 | 751974   | 752445   | 803910   | 804703   |
| 5 NA18572   | [2515685 chr1  | 1  | 809146   | 890159   | 81014   | 100 | 0.439282  | 0.010716 | 808980   | 809312   | 889590   | 890725   |
| 6 NA18572   | [2515685 chr1  | 1  | 1853012  | 1854645  | 1634    | 2   | 1.256025  | 0.100607 | 1852616  | 1853409  | 1853816  | 1855474  |
| 7 NA18572   | [2515685 chr1  | 1  | 10416438 | 10418311 | 1874    | 2   | -0.687025 | 0.103168 | 10415863 | 10417014 | 10417712 | 10418917 |
| 8 NA18572   | [2515685 chr1  | 1  | 12829124 | 12869451 | 40328   | 50  | 0.282261  | 0.01937  | 12828579 | 12829669 | 12868612 | 12870297 |
| 9 NA18572   | [2515685 chr1  | 1  | 12883780 | 12886858 | 3079    | 5   | 0.447389  | 0.053607 | 12883337 | 12884224 | 12886536 | 12887187 |

|            |               |   |           |           |        |     |           |          |           |           |           |           |
|------------|---------------|---|-----------|-----------|--------|-----|-----------|----------|-----------|-----------|-----------|-----------|
| 10 NA18572 | [2515685 chr1 | 1 | 12887630  | 12888178  | 549    | 2   | 0.453479  | 0.084781 | 12887352  | 12887909  | 12887924  | 1288843:  |
| 11 NA18572 | [2515685 chr1 | 1 | 12914903  | 12924769  | 9867   | 18  | 0.261578  | 0.03415  | 12914677  | 12915129  | 12923902  | 1292563:  |
| 12 NA18572 | [2515685 chr1 | 1 | 13124784  | 13125221  | 438    | 2   | 0.613687  | 0.094849 | 13124609  | 13124960  | 13124977  | 1312546:  |
| 13 NA18572 | [2515685 chr1 | 1 | 13158620  | 13159168  | 549    | 2   | 0.453479  | 0.084781 | 13158367  | 13158874  | 13158889  | 1315944:  |
| 14 NA18572 | [2515685 chr1 | 1 | 13159940  | 13162706  | 2767   | 4   | 0.474844  | 0.052645 | 13159618  | 13160263  | 13162366  | 1316304:  |
| 15 NA18572 | [2515685 chr1 | 1 | 13177342  | 13197672  | 20331  | 13  | 0.270875  | 0.029343 | 13176478  | 13178206  | 13197496  | 1319784:  |
| 16 NA18572 | [2515685 chr1 | 1 | 13379417  | 13379965  | 549    | 2   | 0.453479  | 0.084781 | 13379164  | 13379671  | 13379686  | 1338024:  |
| 17 NA18572 | [2515685 chr1 | 1 | 13380737  | 13383503  | 2767   | 4   | 0.474844  | 0.052645 | 13380415  | 13381060  | 13383163  | 1338384:  |
| 18 NA18572 | [2515685 chr1 | 1 | 13398137  | 13418527  | 20391  | 13  | 0.270875  | 0.029343 | 13397275  | 13399000  | 13418351  | 1341870:  |
| 19 NA18572 | [2515685 chr1 | 1 | 25330950  | 25409968  | 79019  | 78  | 0.302636  | 0.01617  | 25330662  | 25331238  | 25409763  | 2541017:  |
| 20 NA18572 | [2515685 chr1 | 1 | 72478372  | 72524180  | 45809  | 36  | -1.964138 | 0.039671 | 72478140  | 72478604  | 72523661  | 7252470:  |
| 21 NA18572 | [2515685 chr1 | 1 | 94869509  | 94870854  | 1346   | 3   | 0.420623  | 0.074815 | 94869219  | 94869799  | 94870647  | 9487106:  |
| 22 NA18572 | [2515685 chr1 | 1 | 105728161 | 105735462 | 7302   | 8   | -3.202874 | 0.11211  | 105727820 | 105728503 | 105734532 | 10573639  |
| 23 NA18572 | [2515685 chr1 | 1 | 108444641 | 108449550 | 4910   | 9   | 0.655763  | 0.051234 | 108443817 | 108445466 | 108449224 | 10844987  |
| 24 NA18572 | [2515685 chr1 | 1 | 109936541 | 109965726 | 29186  | 31  | 0.344837  | 0.025704 | 109935803 | 109937279 | 109965065 | 10996638  |
| 25 NA18572 | [2515685 chr1 | 1 | 116870606 | 116915240 | 44635  | 54  | -0.254092 | 0.019388 | 116869172 | 116872040 | 116914887 | 11691559  |
| 26 NA18572 | [2515685 chr1 | 1 | 120244720 | 120342752 | 98033  | 152 | 0.262919  | 0.011471 | 120243262 | 120246178 | 120342542 | 12034296  |
| 27 NA18572 | [2515685 chr1 | 1 | 141915781 | 141916644 | 864    | 3   | 0.707606  | 0.070513 | 141915140 | 141916422 | 141916449 | 14191683  |
| 28 NA18572 | [2515685 chr1 | 1 | 141967283 | 141968632 | 1350   | 4   | 0.503288  | 0.051856 | 141967011 | 141967556 | 141968396 | 14196886  |
| 29 NA18572 | [2515685 chr1 | 1 | 141971552 | 141976016 | 4465   | 15  | 0.412059  | 0.031323 | 141971472 | 141971633 | 141975838 | 14197619  |
| 30 NA18572 | [2515685 chr1 | 1 | 142096128 | 142096822 | 695    | 2   | 0.628798  | 0.076477 | 142095585 | 142096671 | 142096672 | 14209697  |
| 31 NA18572 | [2515685 chr1 | 1 | 142438646 | 142569435 | 130790 | 159 | 0.341815  | 0.011498 | 142438189 | 142439104 | 142568775 | 14257009  |
| 32 NA18572 | [2515685 chr1 | 1 | 142744385 | 142745273 | 889    | 2   | 0.935923  | 0.119983 | 142743794 | 142744976 | 142745023 | 14274552  |
| 33 NA18572 | [2515685 chr1 | 1 | 145044635 | 145045386 | 752    | 2   | 0.628798  | 0.076477 | 145044092 | 145045178 | 145045179 | 14504559  |
| 34 NA18572 | [2515685 chr1 | 1 | 145095961 | 145097353 | 1393   | 4   | 0.503288  | 0.051856 | 145095646 | 145096276 | 145097116 | 14509759  |
| 35 NA18572 | [2515685 chr1 | 1 | 145100273 | 145104402 | 4130   | 11  | 0.435051  | 0.037823 | 145100193 | 145100354 | 145104354 | 14510445  |
| 36 NA18572 | [2515685 chr1 | 1 | 145819541 | 145821079 | 1539   | 2   | 0.80413   | 0.10747  | 145819262 | 145819821 | 145820633 | 14582152  |
| 37 NA18572 | [2515685 chr1 | 1 | 145929568 | 145951531 | 21964  | 26  | 0.388955  | 0.029131 | 145929405 | 145929732 | 145951467 | 14595159  |
| 38 NA18572 | [2515685 chr1 | 1 | 146331638 | 146340401 | 8764   | 27  | 0.351584  | 0.022839 | 146331441 | 146331836 | 146340086 | 14634071  |
| 39 NA18572 | [2515685 chr1 | 1 | 146391020 | 146391476 | 457    | 2   | 0.628797  | 0.076477 | 146390812 | 146391228 | 146391229 | 14639172: |
| 40 NA18572 | [2515685 chr1 | 1 | 148998878 | 149005918 | 7041   | 13  | 0.928645  | 0.028533 | 148998401 | 148999355 | 149004680 | 14900715  |
| 41 NA18572 | [2515685 chr1 | 1 | 149573821 | 149583431 | 9611   | 5   | 0.885236  | 0.077042 | 149573460 | 149574182 | 149582912 | 14958395  |
| 42 NA18572 | [2515685 chr1 | 1 | 158224068 | 158264535 | 40468  | 49  | 0.339942  | 0.014635 | 158223552 | 158224584 | 158264300 | 15826477  |
| 43 NA18572 | [2515685 chr1 | 1 | 193443035 | 193552515 | 109481 | 94  | 0.349304  | 0.01556  | 193442791 | 193443280 | 193551981 | 19355305  |
| 44 NA18572 | [2515685 chr1 | 1 | 193619849 | 193650443 | 30595  | 24  | 0.259711  | 0.028953 | 193619444 | 193620254 | 193650245 | 19365064  |
| 45 NA18572 | [2515685 chr1 | 1 | 204085589 | 204139817 | 54229  | 73  | -0.275658 | 0.013409 | 204085310 | 204085868 | 204139535 | 20414009  |
| 46 NA18572 | [2515685 chr1 | 1 | 226117234 | 226125723 | 8490   | 2   | -0.617319 | 0.11283  | 226114786 | 226119683 | 226122453 | 22612975  |
| 47 NA18572 | [2515685 chr1 | 1 | 236719047 | 236720968 | 1922   | 3   | -2.859857 | 0.143338 | 236718751 | 236719344 | 236720749 | 23672118  |
| 48 NA18572 | [2515685 chr1 | 1 | 243009520 | 243011368 | 1849   | 3   | -0.53163  | 0.082335 | 243008430 | 243010610 | 243011204 | 24301153  |
| 49 NA18572 | [2515685 chr1 | 1 | 244850108 | 244851538 | 1431   | 2   | 0.592338  | 0.114533 | 244849536 | 244850681 | 244851004 | 24485207  |
| 50 NA18572 | [2515685 chr1 | 1 | 245053742 | 245055036 | 1295   | 2   | -0.869215 | 0.16388  | 245053467 | 245054017 | 245054669 | 24505540  |
| 51 NA18572 | [2515685 chr1 | 1 | 245065841 | 245121920 | 56080  | 53  | -0.685885 | 0.021231 | 245065663 | 245066019 | 245121605 | 24512223  |
| 52 NA18572 | [2515685 chr2 | 2 | 296456    | 298925    | 2470   | 8   | -0.822581 | 0.056622 | 296213    | 296699    | 298661    | 299185    |
| 53 NA18572 | [2515685 chr2 | 2 | 34606442  | 34644767  | 38326  | 39  | 0.601151  | 0.02593  | 34601818  | 34609397  | 34641812  | 3464839   |
| 54 NA18572 | [2515685 chr2 | 2 | 52661573  | 52696869  | 35297  | 26  | -0.783057 | 0.033599 | 52661218  | 52661928  | 52696416  | 5269732:  |
| 55 NA18572 | [2515685 chr2 | 2 | 56563622  | 56567381  | 3760   | 2   | 2.213643  | 0.21738  | 56556559  | 56566577  | 56567035  | 5656772:  |
| 56 NA18572 | [2515685 chr2 | 2 | 61675589  | 61676777  | 1189   | 2   | 1.384351  | 0.145382 | 61675200  | 61675979  | 61676468  | 6167708:  |
| 57 NA18572 | [2515685 chr2 | 2 | 66416834  | 66420210  | 3377   | 2   | -0.583698 | 0.095084 | 66416385  | 66417284  | 66419065  | 6642135:  |
| 58 NA18572 | [2515685 chr2 | 2 | 73945377  | 73947364  | 1988   | 4   | 0.333596  | 0.057662 | 73945149  | 73945606  | 73947215  | 7394751:  |
| 59 NA18572 | [2515685 chr2 | 2 | 87044462  | 87059575  | 15114  | 24  | 0.30238   | 0.023977 | 87044084  | 87044841  | 87059360  | 8705979:  |
| 60 NA18572 | [2515685 chr2 | 2 | 88121358  | 88126839  | 5482   | 10  | 0.316746  | 0.04442  | 88121177  | 88121539  | 88126458  | 8812722:  |
| 61 NA18572 | [2515685 chr2 | 2 | 95955128  | 96003260  | 48133  | 8   | -0.25528  | 0.04828  | 95955106  | 95955151  | 96001311  | 9600520:  |
| 62 NA18572 | [2515685 chr2 | 2 | 97184386  | 97189737  | 5352   | 2   | -0.637987 | 0.104602 | 97182781  | 97185992  | 97186782  | 9719672:  |
| 63 NA18572 | [2515685 chr2 | 2 | 97280360  | 97321410  | 41051  | 51  | -0.301608 | 0.019806 | 97279637  | 97281084  | 97321388  | 9732143:  |
| 64 NA18572 | [2515685 chr2 | 2 | 97603653  | 97610616  | 6964   | 6   | -0.315345 | 0.054179 | 97600155  | 97606608  | 97610541  | 9761069:  |

|             |               |   |           |           |        |     |           |          |           |           |           |          |
|-------------|---------------|---|-----------|-----------|--------|-----|-----------|----------|-----------|-----------|-----------|----------|
| 65 NA18572  | [2515685 chr2 | 2 | 97613796  | 97614932  | 1137   | 2   | 1.519699  | 0.139086 | 97613553  | 97614040  | 97614467  | 97615391 |
| 66 NA18572  | [2515685 chr2 | 2 | 106338419 | 106344320 | 5902   | 7   | -0.5174   | 0.063406 | 106337769 | 106339069 | 106344055 | 10634458 |
| 67 NA18572  | [2515685 chr2 | 2 | 107475477 | 107477568 | 2092   | 2   | -1.056598 | 0.142633 | 107474333 | 107476621 | 107477239 | 10747789 |
| 68 NA18572  | [2515685 chr2 | 2 | 112312740 | 112320429 | 7690   | 9   | 0.268082  | 0.045402 | 112312045 | 112313436 | 112319833 | 11232102 |
| 69 NA18572  | [2515685 chr2 | 2 | 126159437 | 126168349 | 8913   | 3   | -0.764676 | 0.09017  | 126158494 | 126160381 | 126168048 | 12616865 |
| 70 NA18572  | [2515685 chr2 | 2 | 132846945 | 132880524 | 33580  | 30  | 0.326153  | 0.027546 | 132846760 | 132847131 | 132880298 | 13288075 |
| 71 NA18572  | [2515685 chr2 | 2 | 153622711 | 153625256 | 2546   | 3   | 0.749382  | 0.095238 | 153621175 | 153624247 | 153625088 | 15362542 |
| 72 NA18572  | [2515685 chr2 | 2 | 208176479 | 208184457 | 7979   | 7   | 0.713526  | 0.06112  | 208176093 | 208176865 | 208183930 | 20818498 |
| 73 NA18572  | [2515685 chr2 | 2 | 228717927 | 228730812 | 12886  | 3   | -0.7212   | 0.082815 | 228715615 | 228720239 | 228730139 | 22873148 |
| 74 NA18572  | [2515685 chr2 | 2 | 242661256 | 242662332 | 1077   | 7   | 0.268224  | 0.051866 | 242661125 | 242661388 | 242662217 | 24266244 |
| 75 NA18572  | [2515685 chr2 | 2 | 242664580 | 242668683 | 4104   | 10  | 2.28415   | 0.054443 | 242664284 | 242664877 | 242668532 | 24266883 |
| 76 NA18572  | [2515685 chr2 | 2 | 242668683 | 242777652 | 108970 | 175 | 0.324002  | 0.011205 | 242668532 | 242668835 | 242777538 | 24277776 |
| 77 NA18572  | [2515685 chr3 | 3 | 1757211   | 1765705   | 8495   | 2   | 0.665019  | 0.116871 | 1756096   | 1758327   | 1762058   | 1797300  |
| 78 NA18572  | [2515685 chr3 | 3 | 6622784   | 6629620   | 6837   | 6   | -0.661082 | 0.058665 | 6492869   | 6626431   | 6629261   | 6629980  |
| 79 NA18572  | [2515685 chr3 | 3 | 37954149  | 37962148  | 8000   | 10  | -0.611663 | 0.047498 | 37953404  | 37954894  | 37961762  | 3796253  |
| 80 NA18572  | [2515685 chr3 | 3 | 68821474  | 68830847  | 9374   | 17  | -1.27629  | 0.050528 | 68818894  | 68824055  | 68830417  | 6883127  |
| 81 NA18572  | [2515685 chr3 | 3 | 133191392 | 133196576 | 5185   | 5   | -0.701969 | 0.067564 | 133190820 | 133191965 | 133195824 | 13319732 |
| 82 NA18572  | [2515685 chr3 | 3 | 139287051 | 139289507 | 2451   | 3   | 0.523356  | 0.102421 | 139286041 | 139288073 | 139289200 | 13928981 |
| 83 NA18572  | [2515685 chr3 | 3 | 164200660 | 164205886 | 5227   | 5   | -0.711873 | 0.08671  | 164200187 | 164201133 | 164204674 | 16420709 |
| 84 NA18572  | [2515685 chr3 | 3 | 176561952 | 176567506 | 5555   | 5   | -0.801076 | 0.083286 | 176560250 | 176563654 | 176565991 | 17656902 |
| 85 NA18572  | [2515685 chr3 | 3 | 192547312 | 192554331 | 7020   | 10  | 0.778116  | 0.052783 | 192546950 | 192547674 | 192554127 | 19255453 |
| 86 NA18572  | [2515685 chr3 | 3 | 196679304 | 196713768 | 34465  | 36  | 0.534615  | 0.018968 | 196677636 | 196680972 | 196711768 | 19671576 |
| 87 NA18572  | [2515685 chr3 | 3 | 196946678 | 196958848 | 12171  | 10  | -0.419196 | 0.048024 | 196946096 | 196947261 | 196956437 | 19696126 |
| 88 NA18572  | [2515685 chr3 | 3 | 196994475 | 197002965 | 8491   | 10  | 0.535812  | 0.04577  | 196994054 | 196994896 | 197002044 | 19700388 |
| 89 NA18572  | [2515685 chr3 | 3 | 198422794 | 198427408 | 4615   | 2   | 0.906963  | 0.142921 | 198422381 | 198423207 | 198423959 | 19843085 |
| 90 NA18572  | [2515685 chr3 | 3 | 199383185 | 199387297 | 4113   | 6   | 0.413272  | 0.064506 | 199382863 | 199383507 | 199384743 | 19938985 |
| 91 NA18572  | [2515685 chr4 | 4 | 8998178   | 9046719   | 48542  | 87  | 0.765034  | 0.010076 | 8850774   | 9001243   | 9046129   | 9047305  |
| 92 NA18572  | [2515685 chr4 | 4 | 9812346   | 9813108   | 763    | 33  | 0.672525  | 0.019942 | 9812284   | 9812408   | 9812952   | 9813261  |
| 93 NA18572  | [2515685 chr4 | 4 | 9887220   | 9910115   | 22896  | 30  | 1.558093  | 0.039475 | 9886886   | 9887555   | 9909843   | 9910388  |
| 94 NA18572  | [2515685 chr4 | 4 | 34602797  | 34650994  | 48198  | 45  | 0.724036  | 0.024323 | 34601994  | 34603600  | 34649535  | 3465245  |
| 95 NA18572  | [2515685 chr4 | 4 | 49121744  | 49174406  | 52663  | 193 | 0.329908  | 0.008364 | 49121741  | 49121747  | 49174404  | 49174405 |
| 96 NA18572  | [2515685 chr4 | 4 | 49353231  | 49361409  | 8179   | 14  | 0.343958  | 0.031502 | 49352892  | 49353570  | 49359431  | 4936338  |
| 97 NA18572  | [2515685 chr4 | 4 | 63500375  | 63504889  | 4515   | 5   | -0.84454  | 0.086684 | 63494261  | 63503440  | 63504639  | 63505140 |
| 98 NA18572  | [2515685 chr4 | 4 | 70206173  | 70211038  | 4866   | 6   | 0.31851   | 0.063547 | 70205193  | 70207154  | 70209639  | 7021243  |
| 99 NA18572  | [2515685 chr4 | 4 | 70329576  | 70418701  | 89126  | 87  | 0.450386  | 0.016799 | 70329375  | 70329777  | 70418467  | 70418931 |
| 100 NA18572 | [2515685 chr4 | 4 | 122639779 | 122647776 | 7998   | 6   | -0.873405 | 0.06468  | 122639003 | 122640555 | 122647404 | 12264814 |
| 101 NA18572 | [2515685 chr4 | 4 | 133536193 | 133540723 | 4531   | 3   | -0.562886 | 0.100658 | 133531398 | 133539258 | 133540462 | 13354098 |
| 102 NA18572 | [2515685 chr4 | 4 | 138537751 | 138549906 | 12156  | 14  | 0.873262  | 0.04694  | 138537443 | 138538059 | 138547414 | 13855239 |
| 103 NA18572 | [2515685 chr4 | 4 | 145238696 | 145250378 | 11683  | 10  | -0.33141  | 0.0492   | 145236919 | 145240473 | 145250020 | 14525073 |
| 104 NA18572 | [2515685 chr4 | 4 | 162806038 | 162809269 | 3232   | 3   | 0.805659  | 0.089984 | 162804872 | 162807204 | 162808734 | 16280980 |
| 105 NA18572 | [2515685 chr4 | 4 | 169183401 | 169368370 | 184970 | 163 | 0.698378  | 0.012387 | 169182712 | 169184090 | 169366713 | 16937002 |
| 106 NA18572 | [2515685 chr4 | 4 | 173799832 | 173807320 | 7489   | 6   | -2.251849 | 0.119006 | 173799464 | 173800201 | 173804255 | 17381134 |
| 107 NA18572 | [2515685 chr4 | 4 | 185533276 | 185534552 | 1277   | 2   | 0.671285  | 0.129786 | 185532696 | 185533857 | 185534150 | 18553495 |
| 108 NA18572 | [2515685 chr4 | 4 | 185535274 | 185544849 | 9576   | 9   | 0.831421  | 0.052206 | 185534955 | 185535593 | 185543276 | 18554642 |
| 109 NA18572 | [2515685 chr4 | 4 | 186816666 | 186819359 | 2694   | 4   | 3.154565  | 0.150025 | 186816420 | 186816912 | 186819049 | 18681967 |
| 110 NA18572 | [2515685 chr4 | 4 | 187728494 | 187732907 | 4414   | 15  | 1.76946   | 0.049531 | 187728193 | 187728795 | 187732541 | 18773327 |
| 111 NA18572 | [2515685 chr4 | 4 | 188255523 | 188269680 | 14158  | 235 | 0.536883  | 0.008674 | 188255215 | 188255831 | 188269403 | 18826995 |
| 112 NA18572 | [2515685 chr4 | 4 | 189799455 | 189807562 | 8108   | 11  | -0.376957 | 0.043187 | 189799180 | 189799730 | 189807064 | 18980806 |
| 113 NA18572 | [2515685 chr4 | 4 | 190528602 | 190533163 | 4562   | 21  | -2.4078   | 0.044017 | 190528058 | 190529146 | 190531664 | 19053466 |
| 114 NA18572 | [2515685 chr5 | 5 | 520743    | 523903    | 3161   | 9   | 0.330288  | 0.049386 | 520428    | 521059    | 523590    | 524217   |
| 115 NA18572 | [2515685 chr5 | 5 | 810517    | 820048    | 9532   | 12  | 0.412724  | 0.045596 | 809997    | 811038    | 819824    | 820272   |
| 116 NA18572 | [2515685 chr5 | 5 | 1075284   | 1079920   | 4637   | 24  | 0.321243  | 0.027817 | 1074709   | 1075859   | 1079566   | 1080275  |
| 117 NA18572 | [2515685 chr5 | 5 | 1223248   | 1223930   | 683    | 5   | 1.119332  | 0.063024 | 1223057   | 1223439   | 1223854   | 1224007  |
| 118 NA18572 | [2515685 chr5 | 5 | 17570617  | 17643104  | 72488  | 331 | -0.398537 | 0.005845 | 17570551  | 17570684  | 17642455  | 1764375  |
| 119 NA18572 | [2515685 chr5 | 5 | 17663728  | 17667407  | 3680   | 8   | -0.339995 | 0.041849 | 17663473  | 17663984  | 17667174  | 1766764  |

|             |               |   |           |           |        |     |           |          |           |           |           |           |
|-------------|---------------|---|-----------|-----------|--------|-----|-----------|----------|-----------|-----------|-----------|-----------|
| 120 NA18572 | [2515685 chr5 | 5 | 19410747  | 19412172  | 1426   | 3   | 0.732937  | 0.091347 | 19410189  | 19411305  | 19411980  | 1941236!  |
| 121 NA18572 | [2515685 chr5 | 5 | 21483394  | 21488147  | 4754   | 4   | -1.952858 | 0.10175  | 21480817  | 21485972  | 21487855  | 2148843!  |
| 122 NA18572 | [2515685 chr5 | 5 | 26831997  | 26837938  | 5942   | 6   | 0.679871  | 0.066164 | 26829858  | 26834136  | 26837469  | 2683840!  |
| 123 NA18572 | [2515685 chr5 | 5 | 62076138  | 62139610  | 63473  | 61  | 0.437394  | 0.018579 | 62075480  | 62076797  | 62138051  | 6214117!  |
| 124 NA18572 | [2515685 chr5 | 5 | 69404835  | 69411352  | 6518   | 6   | 0.505081  | 0.04683  | 69404157  | 69405513  | 69410702  | 6941200!  |
| 125 NA18572 | [2515685 chr5 | 5 | 70280260  | 70286789  | 6530   | 6   | 0.498679  | 0.046382 | 70279582  | 70280938  | 70286122  | 7028745!  |
| 126 NA18572 | [2515685 chr5 | 5 | 70340791  | 70346521  | 5731   | 7   | 0.475316  | 0.060474 | 70340046  | 70341537  | 70346074  | 7034696!  |
| 127 NA18572 | [2515685 chr5 | 5 | 81459213  | 81466055  | 6843   | 2   | -1.323469 | 0.118528 | 81455614  | 81462405  | 81462863  | 8147028!  |
| 128 NA18572 | [2515685 chr5 | 5 | 85552077  | 85556158  | 4082   | 2   | 0.562685  | 0.105101 | 85551422  | 85552732  | 85555891  | 8555642!  |
| 129 NA18572 | [2515685 chr5 | 5 | 97427204  | 97428353  | 1150   | 2   | 0.920742  | 0.11884  | 97426913  | 97427496  | 97428177  | 9742852!  |
| 130 NA18572 | [2515685 chr5 | 5 | 97465497  | 97467027  | 1531   | 3   | -0.485124 | 0.088526 | 97465358  | 97465637  | 97466801  | 9746725!  |
| 131 NA18572 | [2515685 chr5 | 5 | 99408801  | 99419037  | 10237  | 14  | -0.650313 | 0.040076 | 99408605  | 99408997  | 99418328  | 9941974!  |
| 132 NA18572 | [2515685 chr5 | 5 | 137835178 | 137844134 | 8957   | 8   | 0.446526  | 0.055984 | 137834745 | 137835611 | 137843310 | 13784495! |
| 133 NA18572 | [2515685 chr5 | 5 | 140203081 | 140218928 | 15848  | 20  | 1.906458  | 0.049229 | 140202344 | 140203819 | 140218508 | 14021934! |
| 134 NA18572 | [2515685 chr5 | 5 | 150157909 | 150161837 | 3929   | 6   | -1.841509 | 0.08851  | 150157286 | 150158532 | 150161621 | 15016205! |
| 135 NA18572 | [2515685 chr5 | 5 | 150183322 | 150203144 | 19823  | 10  | -1.626924 | 0.065421 | 150181427 | 150185218 | 150202838 | 15020345! |
| 136 NA18572 | [2515685 chr5 | 5 | 150203144 | 150204419 | 1276   | 2   | -0.725648 | 0.105535 | 150202838 | 150203451 | 150204151 | 15020468! |
| 137 NA18572 | [2515685 chr5 | 5 | 165157996 | 165161604 | 3609   | 2   | -0.63394  | 0.122377 | 165155280 | 165160712 | 165160802 | 16516240! |
| 138 NA18572 | [2515685 chr5 | 5 | 180272463 | 180280227 | 7765   | 6   | -0.360062 | 0.065032 | 180271275 | 180273651 | 180277035 | 18028376! |
| 139 NA18572 | [2515685 chr5 | 5 | 180308895 | 180363417 | 54523  | 54  | 0.464756  | 0.02071  | 180308688 | 180309103 | 180363120 | 18036371! |
| 140 NA18572 | [2515685 chr5 | 5 | 180712241 | 180820558 | 108318 | 138 | -0.478885 | 0.012472 | 180707313 | 180715433 | 180820332 | 18082078! |
| 141 NA18572 | [2515685 chr6 | 6 | 18689     | 66741     | 48053  | 69  | -0.529161 | 0.017245 | 15669     | 21709     | 63238     | 71418     |
| 142 NA18572 | [2515685 chr6 | 6 | 201823    | 327656    | 125834 | 128 | 0.369275  | 0.012982 | 201415    | 202232    | 326993    | 328320    |
| 143 NA18572 | [2515685 chr6 | 6 | 26764826  | 26766683  | 1858   | 2   | -0.744671 | 0.119861 | 26764639  | 26765013  | 26766181  | 2676718!  |
| 144 NA18572 | [2515685 chr6 | 6 | 31383567  | 31386100  | 2534   | 3   | -0.700954 | 0.106501 | 31383185  | 31383949  | 31385806  | 3138639!  |
| 145 NA18572 | [2515685 chr6 | 6 | 32557802  | 32558865  | 1064   | 2   | 0.929639  | 0.11963  | 32557647  | 32557958  | 32558698  | 3255903!  |
| 146 NA18572 | [2515685 chr6 | 6 | 32565102  | 32586862  | 21761  | 3   | -2.604237 | 0.252352 | 32564888  | 32565316  | 32586127  | 3258759!  |
| 147 NA18572 | [2515685 chr6 | 6 | 32605125  | 32605958  | 834    | 2   | -2.567161 | 0.171538 | 32604923  | 32605328  | 32605760  | 3260615!  |
| 148 NA18572 | [2515685 chr6 | 6 | 32631127  | 32632349  | 1223   | 2   | -0.680486 | 0.122753 | 32630911  | 32631343  | 32632089  | 3263261!  |
| 149 NA18572 | [2515685 chr6 | 6 | 32644822  | 32651918  | 7097   | 5   | 0.608414  | 0.092705 | 32644460  | 32645184  | 32651147  | 3265268!  |
| 150 NA18572 | [2515685 chr6 | 6 | 32653862  | 32654720  | 859    | 2   | 1.961775  | 0.231559 | 32653679  | 32654046  | 32654460  | 3265498!  |
| 151 NA18572 | [2515685 chr6 | 6 | 32661503  | 32664861  | 3359   | 2   | 0.58426   | 0.104133 | 32660912  | 32662094  | 32663824  | 3266589!  |
| 152 NA18572 | [2515685 chr6 | 6 | 32666229  | 32667673  | 1445   | 3   | 0.905715  | 0.089346 | 32665899  | 32666560  | 32667507  | 3266783!  |
| 153 NA18572 | [2515685 chr6 | 6 | 32702716  | 32705737  | 3022   | 3   | -1.359645 | 0.082018 | 32702285  | 32703148  | 32704019  | 3270745!  |
| 154 NA18572 | [2515685 chr6 | 6 | 32712337  | 32728733  | 16397  | 16  | 0.516143  | 0.026946 | 32712193  | 32712482  | 32728515  | 3272895!  |
| 155 NA18572 | [2515685 chr6 | 6 | 32735984  | 32744343  | 8360   | 14  | 0.516143  | 0.026946 | 32735718  | 32736251  | 32744136  | 3274455!  |
| 156 NA18572 | [2515685 chr6 | 6 | 32753162  | 32760803  | 7642   | 4   | 0.435904  | 0.072767 | 32745721  | 32756665  | 32760588  | 3276101!  |
| 157 NA18572 | [2515685 chr6 | 6 | 32775535  | 32777812  | 2278   | 3   | 0.547753  | 0.104138 | 32775260  | 32775810  | 32777125  | 3277849!  |
| 158 NA18572 | [2515685 chr6 | 6 | 35862833  | 35874426  | 11594  | 13  | 0.366898  | 0.040625 | 35862530  | 35863136  | 35873957  | 3587489!  |
| 159 NA18572 | [2515685 chr6 | 6 | 54036900  | 54042384  | 5485   | 5   | 1.99216   | 0.130622 | 54036573  | 54037227  | 54041771  | 5404299!  |
| 160 NA18572 | [2515685 chr6 | 6 | 74648985  | 74658750  | 9766   | 11  | -0.558026 | 0.050228 | 74648748  | 74649222  | 74655247  | 7466226!  |
| 161 NA18572 | [2515685 chr6 | 6 | 77495034  | 77513514  | 18481  | 12  | 0.585806  | 0.049889 | 77493568  | 77496500  | 77510011  | 7751769!  |
| 162 NA18572 | [2515685 chr6 | 6 | 79023318  | 79093263  | 69946  | 70  | 0.682602  | 0.019898 | 79022028  | 79024609  | 79091909  | 7909461!  |
| 163 NA18572 | [2515685 chr6 | 6 | 103844685 | 103871201 | 26517  | 16  | 1.491369  | 0.064098 | 103844347 | 103845023 | 103868241 | 10387416! |
| 164 NA18572 | [2515685 chr6 | 6 | 115492959 | 115494541 | 1583   | 2   | 0.919044  | 0.138422 | 115492678 | 115493240 | 115494140 | 11549494! |
| 165 NA18572 | [2515685 chr6 | 6 | 120671191 | 120671916 | 726    | 2   | 1.117873  | 0.119171 | 120670696 | 120671686 | 120671725 | 12067210! |
| 166 NA18572 | [2515685 chr6 | 6 | 160056728 | 160058998 | 2271   | 2   | -0.817709 | 0.090602 | 160055808 | 160057648 | 160058322 | 16005967! |
| 167 NA18572 | [2515685 chr6 | 6 | 161001907 | 161040123 | 38217  | 64  | 0.53797   | 0.011942 | 161001167 | 161002648 | 161039033 | 16104121! |
| 168 NA18572 | [2515685 chr6 | 6 | 168453011 | 168456762 | 3752   | 3   | 0.46571   | 0.08461  | 168452611 | 168453411 | 168456200 | 16845732! |
| 169 NA18572 | [2515685 chr6 | 6 | 168780035 | 168781989 | 1955   | 4   | -0.348759 | 0.069647 | 168779504 | 168780567 | 168781555 | 16878242! |
| 170 NA18572 | [2515685 chr6 | 6 | 169323803 | 169339206 | 15404  | 16  | -0.554903 | 0.040639 | 169323679 | 169323927 | 169335703 | 16934367! |
| 171 NA18572 | [2515685 chr6 | 6 | 170603879 | 170604666 | 788    | 2   | -1.475185 | 0.11431  | 170603541 | 170604217 | 170604339 | 17060499! |
| 172 NA18572 | [2515685 chr6 | 6 | 170852395 | 170961212 | 108818 | 127 | -0.498169 | 0.012865 | 170849927 | 170854863 | 170960986 | 17096143! |
| 173 NA18572 | [2515685 chr7 | 7 | 113212    | 116134    | 2923   | 12  | 0.414889  | 0.047188 | 113146    | 113279    | 115995    | 116273    |
| 174 NA18572 | [2515685 chr7 | 7 | 247388    | 254518    | 7131   | 9   | -0.719933 | 0.052611 | 247117    | 247659    | 254199    | 254838    |



|             |               |   |           |           |        |     |           |          |           |           |           |           |
|-------------|---------------|---|-----------|-----------|--------|-----|-----------|----------|-----------|-----------|-----------|-----------|
| 175 NA18572 | [2515685 chr7 | 7 | 929017    | 930663    | 1647   | 5   | 0.327676  | 0.065228 | 928626    | 929408    | 930382    | 930945    |
| 176 NA18572 | [2515685 chr7 | 7 | 1084125   | 1086660   | 2536   | 15  | 0.456456  | 0.037284 | 1083752   | 1084499   | 1085871   | 1087445   |
| 177 NA18572 | [2515685 chr7 | 7 | 3384111   | 3392457   | 8347   | 8   | 0.746288  | 0.055947 | 3383451   | 3384772   | 3390107   | 3395615   |
| 178 NA18572 | [2515685 chr7 | 7 | 38159778  | 38177664  | 17887  | 19  | -0.333858 | 0.032131 | 38159476  | 38160081  | 38177341  | 38177987  |
| 179 NA18572 | [2515685 chr7 | 7 | 38284545  | 38286283  | 1739   | 2   | -0.560636 | 0.103506 | 38284034  | 38285057  | 38285558  | 38287001  |
| 180 NA18572 | [2515685 chr7 | 7 | 43775620  | 43789873  | 14254  | 17  | 0.30113   | 0.030588 | 43775434  | 43775807  | 43789550  | 43790191  |
| 181 NA18572 | [2515685 chr7 | 7 | 56654798  | 56670462  | 15665  | 12  | 0.325095  | 0.02953  | 56654171  | 56655425  | 56670409  | 56670511  |
| 182 NA18572 | [2515685 chr7 | 7 | 62131323  | 62135875  | 4553   | 9   | -0.37995  | 0.047214 | 62130670  | 62131977  | 62135619  | 62136133  |
| 183 NA18572 | [2515685 chr7 | 7 | 62155321  | 62193125  | 37805  | 106 | -0.254363 | 0.014066 | 62154667  | 62155975  | 62192933  | 62193317  |
| 184 NA18572 | [2515685 chr7 | 7 | 62223671  | 62247077  | 23407  | 89  | -0.341393 | 0.015839 | 62223604  | 62223738  | 62246794  | 62247361  |
| 185 NA18572 | [2515685 chr7 | 7 | 62309817  | 62333584  | 23768  | 89  | -0.341824 | 0.015849 | 62309804  | 62309830  | 62333517  | 62333657  |
| 186 NA18572 | [2515685 chr7 | 7 | 62552733  | 62553675  | 943    | 3   | -0.565291 | 0.081811 | 62552316  | 62553150  | 62553465  | 62553881  |
| 187 NA18572 | [2515685 chr7 | 7 | 62651575  | 62670113  | 18539  | 9   | 0.345002  | 0.030317 | 62650114  | 62653036  | 62667763  | 62673267  |
| 188 NA18572 | [2515685 chr7 | 7 | 63995985  | 64010720  | 14736  | 18  | 0.299518  | 0.035    | 63995676  | 63996294  | 64010307  | 64011137  |
| 189 NA18572 | [2515685 chr7 | 7 | 64036058  | 64045487  | 9430   | 26  | -0.323026 | 0.027928 | 64035864  | 64036252  | 64045069  | 64045901  |
| 190 NA18572 | [2515685 chr7 | 7 | 64464087  | 64481591  | 17505  | 46  | -0.267432 | 0.020531 | 64463669  | 64464506  | 64481417  | 64481761  |
| 191 NA18572 | [2515685 chr7 | 7 | 64538610  | 64556662  | 18053  | 48  | -0.258629 | 0.019848 | 64537873  | 64539348  | 64556244  | 64557081  |
| 192 NA18572 | [2515685 chr7 | 7 | 64690171  | 64725545  | 35375  | 39  | 0.385912  | 0.022546 | 64689761  | 64690582  | 64725209  | 64725887  |
| 193 NA18572 | [2515685 chr7 | 7 | 69869623  | 69871056  | 1434   | 2   | 2.490466  | 0.151633 | 69869269  | 69869978  | 69870420  | 69871697  |
| 194 NA18572 | [2515685 chr7 | 7 | 89455601  | 89456632  | 1032   | 2   | 3.975748  | 0.202353 | 89455373  | 89455830  | 89456225  | 89457037  |
| 195 NA18572 | [2515685 chr7 | 7 | 90676411  | 90686518  | 10108  | 14  | -0.680349 | 0.043684 | 90674727  | 90678095  | 90685238  | 90687797  |
| 196 NA18572 | [2515685 chr7 | 7 | 92971481  | 92976895  | 5415   | 4   | 0.656978  | 0.086251 | 92971060  | 92971903  | 92975569  | 92978227  |
| 197 NA18572 | [2515685 chr7 | 7 | 101739942 | 101746499 | 6558   | 7   | 0.357782  | 0.041254 | 101739929 | 101739956 | 101745864 | 10174713  |
| 198 NA18572 | [2515685 chr7 | 7 | 101750729 | 101759251 | 8523   | 11  | 0.381948  | 0.033211 | 101750058 | 101751400 | 101759229 | 101759277 |
| 199 NA18572 | [2515685 chr7 | 7 | 101839168 | 101845706 | 6539   | 7   | 0.357782  | 0.041254 | 101839155 | 101839182 | 101845083 | 101846327 |
| 200 NA18572 | [2515685 chr7 | 7 | 101849923 | 101858816 | 8894   | 11  | 0.381948  | 0.033211 | 101849252 | 101850594 | 101858540 | 101859097 |
| 201 NA18572 | [2515685 chr7 | 7 | 109034784 | 109046722 | 11939  | 9   | 1.497581  | 0.074523 | 109024063 | 109037134 | 109046491 | 109046957 |
| 202 NA18572 | [2515685 chr7 | 7 | 109776378 | 109782655 | 6278   | 5   | 0.828799  | 0.076451 | 109775821 | 109776936 | 109782301 | 109783017 |
| 203 NA18572 | [2515685 chr7 | 7 | 125639507 | 125644775 | 5269   | 6   | -2.503633 | 0.121688 | 125639054 | 125639961 | 125644046 | 125645507 |
| 204 NA18572 | [2515685 chr7 | 7 | 133241895 | 133257359 | 15465  | 16  | 1.613529  | 0.053037 | 133240782 | 133243008 | 133255009 | 133260937 |
| 205 NA18572 | [2515685 chr7 | 7 | 141239940 | 141241109 | 1170   | 2   | 0.585651  | 0.115644 | 141239521 | 141240359 | 141240873 | 141241347 |
| 206 NA18572 | [2515685 chr7 | 7 | 141495319 | 141526577 | 31259  | 40  | 0.38381   | 0.02272  | 141494721 | 141495918 | 141526109 | 141527047 |
| 207 NA18572 | [2515685 chr7 | 7 | 142851001 | 142854187 | 3187   | 6   | -0.341655 | 0.057995 | 142850793 | 142851209 | 142853734 | 142854647 |
| 208 NA18572 | [2515685 chr7 | 7 | 143346673 | 143348067 | 1395   | 5   | -0.913966 | 0.063306 | 143346643 | 143346704 | 143347806 | 143348327 |
| 209 NA18572 | [2515685 chr7 | 7 | 143472403 | 143473797 | 1395   | 5   | -0.913964 | 0.063306 | 143472142 | 143472664 | 143473766 | 143473827 |
| 210 NA18572 | [2515685 chr7 | 7 | 152288920 | 152291875 | 2956   | 3   | 0.540629  | 0.098797 | 152288338 | 152289503 | 152291299 | 152292457 |
| 211 NA18572 | [2515685 chr7 | 7 | 157017083 | 157018249 | 1167   | 2   | 0.837215  | 0.117192 | 157016604 | 157017563 | 157017820 | 157018677 |
| 212 NA18572 | [2515685 chr7 | 7 | 158207288 | 158209880 | 2593   | 2   | 0.909151  | 0.120372 | 158206344 | 158208233 | 158209333 | 158210427 |
| 213 NA18572 | [2515685 chr7 | 7 | 158617060 | 158624378 | 7319   | 6   | 0.796741  | 0.069979 | 158616763 | 158617357 | 158622028 | 158626727 |
| 214 NA18572 | [2515685 chr8 | 8 | 13248     | 121240    | 107993 | 134 | -0.483445 | 0.012652 | 12957     | 13540     | 118483    | 126606    |
| 215 NA18572 | [2515685 chr8 | 8 | 170552    | 176309    | 5758   | 8   | 0.424082  | 0.059485 | 169851    | 171254    | 176113    | 176505    |
| 216 NA18572 | [2515685 chr8 | 8 | 234324    | 265743    | 31420  | 40  | 0.381596  | 0.024048 | 233786    | 234863    | 265628    | 265855    |
| 217 NA18572 | [2515685 chr8 | 8 | 314016    | 317019    | 3004   | 5   | 0.545827  | 0.063007 | 313588    | 314445    | 316753    | 317286    |
| 218 NA18572 | [2515685 chr8 | 8 | 366244    | 380021    | 13778  | 22  | 0.394927  | 0.03018  | 366066    | 366422    | 379629    | 380414    |
| 219 NA18572 | [2515685 chr8 | 8 | 1328256   | 1343509   | 15254  | 45  | -1.148631 | 0.021683 | 1327688   | 1328824   | 1342795   | 1344224   |
| 220 NA18572 | [2515685 chr8 | 8 | 2238731   | 2253796   | 15066  | 10  | 0.650291  | 0.050235 | 2233839   | 2241488   | 2251039   | 2257521   |
| 221 NA18572 | [2515685 chr8 | 8 | 4110204   | 4112526   | 2323   | 2   | 2.522722  | 0.190503 | 4109692   | 4110717   | 4112031   | 4113027   |
| 222 NA18572 | [2515685 chr8 | 8 | 4272758   | 4275411   | 2654   | 2   | -0.631474 | 0.107198 | 4272492   | 4273025   | 4275081   | 4275747   |
| 223 NA18572 | [2515685 chr8 | 8 | 5582875   | 5594011   | 11137  | 8   | 0.648802  | 0.052197 | 5582615   | 5583135   | 5592820   | 5595203   |
| 224 NA18572 | [2515685 chr8 | 8 | 5783912   | 5787620   | 3709   | 2   | 0.869935  | 0.133542 | 5783629   | 5784195   | 5787330   | 5787917   |
| 225 NA18572 | [2515685 chr8 | 8 | 6026851   | 6032618   | 5768   | 7   | -0.305839 | 0.058205 | 6026540   | 6027162   | 6032363   | 6032874   |
| 226 NA18572 | [2515685 chr8 | 8 | 6107652   | 6112419   | 4768   | 5   | -0.922845 | 0.076076 | 6107341   | 6107963   | 6111398   | 6113444   |
| 227 NA18572 | [2515685 chr8 | 8 | 6817073   | 6866734   | 49662  | 88  | 0.368185  | 0.01236  | 6816809   | 6817338   | 6866719   | 6866751   |
| 228 NA18572 | [2515685 chr8 | 8 | 7100329   | 7140759   | 40431  | 181 | -0.358911 | 0.007702 | 7099913   | 7100745   | 7140745   | 7140773   |
| 229 NA18572 | [2515685 chr8 | 8 | 7176337   | 7187896   | 11560  | 32  | 0.660265  | 0.027044 | 7176045   | 7176630   | 7187590   | 7188202   |

|             |                |    |           |           |        |      |           |          |           |           |           |           |
|-------------|----------------|----|-----------|-----------|--------|------|-----------|----------|-----------|-----------|-----------|-----------|
| 230 NA18572 | [2515685 chr8  | 8  | 7392777   | 7429111   | 36335  | 153  | -0.36821  | 0.008355 | 7392055   | 7393500   | 7428693   | 7429525   |
| 231 NA18572 | [2515685 chr8  | 8  | 7609134   | 7669460   | 60327  | 271  | -0.340162 | 0.006226 | 7608453   | 7609815   | 7669424   | 7669496   |
| 232 NA18572 | [2515685 chr8  | 8  | 7862335   | 7873897   | 11563  | 33   | 0.68473   | 0.025993 | 7862030   | 7862641   | 7873605   | 7874190   |
| 233 NA18572 | [2515685 chr8  | 8  | 7903980   | 7928723   | 24744  | 96   | -0.335624 | 0.010893 | 7903568   | 7904392   | 7928292   | 7929154   |
| 234 NA18572 | [2515685 chr8  | 8  | 12023188  | 12034819  | 11632  | 31   | 0.695194  | 0.028179 | 12022997  | 12023380  | 12034665  | 12034971  |
| 235 NA18572 | [2515685 chr8  | 8  | 12064450  | 12071763  | 7314   | 24   | -0.339788 | 0.023077 | 12064237  | 12064663  | 12071614  | 12071911  |
| 236 NA18572 | [2515685 chr8  | 8  | 12276602  | 12284041  | 7440   | 14   | 0.553803  | 0.037996 | 12276206  | 12276998  | 12283622  | 12284461  |
| 237 NA18572 | [2515685 chr8  | 8  | 12313731  | 12321305  | 7575   | 22   | -0.332883 | 0.023679 | 12313518  | 12313944  | 12321063  | 12321544  |
| 238 NA18572 | [2515685 chr8  | 8  | 25028407  | 25046917  | 18511  | 15   | -0.782856 | 0.040762 | 25027885  | 25028930  | 25046777  | 25047051  |
| 239 NA18572 | [2515685 chr8  | 8  | 39352204  | 39506673  | 154470 | 161  | 0.64298   | 0.013258 | 39351913  | 39352495  | 39505284  | 39508061  |
| 240 NA18572 | [2515685 chr8  | 8  | 51193670  | 51201152  | 7483   | 11   | -0.741766 | 0.05085  | 51193335  | 51194005  | 51200867  | 51201431  |
| 241 NA18572 | [2515685 chr8  | 8  | 54001807  | 54002677  | 871    | 2    | -0.797141 | 0.125858 | 54001673  | 54001942  | 54002470  | 54002881  |
| 242 NA18572 | [2515685 chr8  | 8  | 58278355  | 58287850  | 9496   | 8    | 0.53621   | 0.042826 | 58277116  | 58279595  | 58287616  | 58288081  |
| 243 NA18572 | [2515685 chr8  | 8  | 85423649  | 85431920  | 8272   | 7    | 0.842296  | 0.064493 | 85423043  | 85424256  | 85431347  | 85432491  |
| 244 NA18572 | [2515685 chr8  | 8  | 86742169  | 86910255  | 168087 | 105  | 0.310631  | 0.009856 | 86741757  | 86742581  | 86910002  | 86910501  |
| 245 NA18572 | [2515685 chr8  | 8  | 91259631  | 91262638  | 3008   | 2    | -0.773289 | 0.113338 | 91259228  | 91260034  | 91260763  | 91264511  |
| 246 NA18572 | [2515685 chr8  | 8  | 120222657 | 120229952 | 7296   | 6    | 0.691661  | 0.067865 | 120218251 | 120225414 | 120229434 | 120230471 |
| 247 NA18572 | [2515685 chr9  | 9  | 138435    | 280093    | 141659 | 178  | 0.28044   | 0.008607 | 138239    | 138631    | 279421    | 280765    |
| 248 NA18572 | [2515685 chr9  | 9  | 310045    | 312573    | 2529   | 61   | 0.28044   | 0.008607 | 309952    | 310139    | 312407    | 312740    |
| 249 NA18572 | [2515685 chr9  | 9  | 28836246  | 28838385  | 2140   | 2    | -0.801407 | 0.110117 | 28835879  | 28836613  | 28837661  | 28839111  |
| 250 NA18572 | [2515685 chr9  | 9  | 40730670  | 40734310  | 3641   | 7    | 0.284285  | 0.048519 | 40730592  | 40730749  | 40733280  | 40735341  |
| 251 NA18572 | [2515685 chr9  | 9  | 42026005  | 42029645  | 3641   | 7    | 0.284282  | 0.048518 | 42024974  | 42027036  | 42029567  | 42029721  |
| 252 NA18572 | [2515685 chr9  | 9  | 44045522  | 44064418  | 18897  | 15   | -0.331658 | 0.03141  | 44045360  | 44045685  | 44064295  | 44064541  |
| 253 NA18572 | [2515685 chr9  | 9  | 101763448 | 101766046 | 2599   | 3    | -0.803359 | 0.102851 | 101763269 | 101763628 | 101764628 | 101767461 |
| 254 NA18572 | [2515685 chr9  | 9  | 101795950 | 101804576 | 8627   | 7    | -0.763605 | 0.066757 | 101795517 | 101796383 | 101803113 | 101806031 |
| 255 NA18572 | [2515685 chr9  | 9  | 101902554 | 101953374 | 50821  | 46   | -0.69489  | 0.023425 | 101902324 | 101902785 | 101951008 | 101957451 |
| 256 NA18572 | [2515685 chr9  | 9  | 112902065 | 112932269 | 30205  | 42   | -0.81625  | 0.015732 | 112901557 | 112902574 | 112931621 | 112932911 |
| 257 NA18572 | [2515685 chr9  | 9  | 135438415 | 135444067 | 5653   | 2    | 2.204371  | 0.13902  | 135383632 | 135440781 | 135443016 | 135445111 |
| 258 NA18572 | [2515685 chr9  | 9  | 138397610 | 138399638 | 2029   | 10   | 0.380223  | 0.050609 | 138397471 | 138397749 | 138399572 | 138399701 |
| 259 NA18572 | [2515685 chr10 | 10 | 170571    | 172369    | 1799   | 2    | 0.747214  | 0.100868 | 170341    | 170801    | 171237    | 173501    |
| 260 NA18572 | [2515685 chr10 | 10 | 6693908   | 6703893   | 9986   | 8    | 0.590084  | 0.058798 | 6692231   | 6695585   | 6703779   | 6704008   |
| 261 NA18572 | [2515685 chr10 | 10 | 20036833  | 20038315  | 1483   | 2    | -0.602979 | 0.112763 | 20036464  | 20037202  | 20038007  | 20038621  |
| 262 NA18572 | [2515685 chr10 | 10 | 20888199  | 20900114  | 11916  | 9    | -0.70902  | 0.055783 | 20883329  | 20890946  | 20897367  | 20902911  |
| 263 NA18572 | [2515685 chr10 | 10 | 37487278  | 37529195  | 41918  | 64   | -0.487729 | 0.014978 | 37486985  | 37487572  | 37528890  | 37529501  |
| 264 NA18572 | [2515685 chr10 | 10 | 46104076  | 46129517  | 25442  | 33   | -0.309156 | 0.019526 | 46104040  | 46104113  | 46129280  | 46129751  |
| 265 NA18572 | [2515685 chr10 | 10 | 46167732  | 46171356  | 3625   | 14   | -0.318266 | 0.031261 | 46167382  | 46168082  | 46171200  | 46171511  |
| 266 NA18572 | [2515685 chr10 | 10 | 46198107  | 46200163  | 2057   | 5    | -0.443341 | 0.059036 | 46197622  | 46198592  | 46200157  | 46200171  |
| 267 NA18572 | [2515685 chr10 | 10 | 46229659  | 47176381  | 946723 | 1346 | -0.280349 | 0.003336 | 46229594  | 46229724  | 47175283  | 47177471  |
| 268 NA18572 | [2515685 chr10 | 10 | 47219897  | 47220637  | 741    | 5    | -0.525897 | 0.06739  | 47219892  | 47219903  | 47220533  | 47220741  |
| 269 NA18572 | [2515685 chr10 | 10 | 47230731  | 47231502  | 772    | 2    | -0.597895 | 0.078613 | 47230574  | 47230889  | 47231201  | 47231801  |
| 270 NA18572 | [2515685 chr10 | 10 | 47723235  | 47736258  | 13024  | 34   | -0.421613 | 0.022162 | 47575187  | 47725982  | 47735982  | 47736531  |
| 271 NA18572 | [2515685 chr10 | 10 | 47736866  | 47758287  | 21422  | 70   | -0.261867 | 0.013809 | 47736710  | 47737023  | 47758256  | 47758311  |
| 272 NA18572 | [2515685 chr10 | 10 | 47788401  | 47790566  | 2166   | 5    | -0.448397 | 0.058571 | 47788395  | 47788408  | 47790187  | 47790941  |
| 273 NA18572 | [2515685 chr10 | 10 | 47889059  | 47889830  | 772    | 2    | -0.597895 | 0.078613 | 47888902  | 47889217  | 47889529  | 47890131  |
| 274 NA18572 | [2515685 chr10 | 10 | 48490524  | 48516048  | 25525  | 32   | -0.301429 | 0.019405 | 48490108  | 48490941  | 48515812  | 48516281  |
| 275 NA18572 | [2515685 chr10 | 10 | 48557501  | 48561210  | 3710   | 16   | -0.311871 | 0.030194 | 48557151  | 48557851  | 48561141  | 48561281  |
| 276 NA18572 | [2515685 chr10 | 10 | 48587840  | 48590149  | 2310   | 6    | -0.425443 | 0.051651 | 48587357  | 48588323  | 48589938  | 48590361  |
| 277 NA18572 | [2515685 chr10 | 10 | 48619404  | 48641100  | 21697  | 56   | -0.26092  | 0.014266 | 48619339  | 48619469  | 48640945  | 48641251  |
| 278 NA18572 | [2515685 chr10 | 10 | 48641804  | 48718244  | 76441  | 119  | -0.338955 | 0.009785 | 48641622  | 48641986  | 48715497  | 48865561  |
| 279 NA18572 | [2515685 chr10 | 10 | 56117212  | 56139275  | 22064  | 20   | -0.912168 | 0.036083 | 56115764  | 56118661  | 56138931  | 56139611  |
| 280 NA18572 | [2515685 chr10 | 10 | 58568869  | 58607072  | 38204  | 29   | -0.710733 | 0.031745 | 58563614  | 58571616  | 58606922  | 58607221  |
| 281 NA18572 | [2515685 chr10 | 10 | 59241070  | 59441596  | 200527 | 209  | -1.949544 | 0.016298 | 59240783  | 59241358  | 59441388  | 59441801  |
| 282 NA18572 | [2515685 chr10 | 10 | 66977355  | 66985193  | 7839   | 8    | -0.715926 | 0.06845  | 66976803  | 66977908  | 66984894  | 66985491  |
| 283 NA18572 | [2515685 chr10 | 10 | 70951158  | 70954100  | 2943   | 2    | -1.488429 | 0.127996 | 70949290  | 70953027  | 70953915  | 70954281  |
| 284 NA18572 | [2515685 chr10 | 10 | 70954100  | 70960432  | 6333   | 3    | -4.823058 | 0.252761 | 70953915  | 70954286  | 70960215  | 70960651  |

|             |                |    |           |           |       |     |           |          |           |           |           |           |
|-------------|----------------|----|-----------|-----------|-------|-----|-----------|----------|-----------|-----------|-----------|-----------|
| 285 NA18572 | [2515685 chr10 | 10 | 81143634  | 81173619  | 29986 | 29  | -0.484735 | 0.020022 | 81142993  | 81144276  | 81171386  | 8117585:  |
| 286 NA18572 | [2515685 chr10 | 10 | 81463822  | 81493795  | 29974 | 27  | -0.465052 | 0.020564 | 81463181  | 81464464  | 81491562  | 8149602:  |
| 287 NA18572 | [2515685 chr10 | 10 | 81662845  | 81669493  | 6649  | 10  | -0.256768 | 0.044819 | 81662614  | 81663077  | 81669128  | 8166985:  |
| 288 NA18572 | [2515685 chr10 | 10 | 88866216  | 88963891  | 97676 | 108 | -0.267593 | 0.009057 | 88865617  | 88866816  | 88963564  | 8896421:  |
| 289 NA18572 | [2515685 chr10 | 10 | 88985844  | 89016296  | 30453 | 41  | -0.267593 | 0.009057 | 88985192  | 88986497  | 89014572  | 8901802:  |
| 290 NA18572 | [2515685 chr10 | 10 | 89221150  | 89249961  | 28812 | 34  | -0.474568 | 0.021863 | 89219426  | 89222875  | 89249436  | 8925048:  |
| 291 NA18572 | [2515685 chr10 | 10 | 124313206 | 124315375 | 2170  | 2   | 0.589028  | 0.115535 | 124312843 | 124313569 | 124314992 | 12431575: |
| 292 NA18572 | [2515685 chr10 | 10 | 124336365 | 124341749 | 5385  | 6   | 0.422209  | 0.067585 | 124335581 | 124337149 | 124341238 | 12434226: |
| 293 NA18572 | [2515685 chr10 | 10 | 124349666 | 124366738 | 17073 | 22  | -0.397798 | 0.020709 | 124349302 | 124350031 | 124366300 | 12436717: |
| 294 NA18572 | [2515685 chr10 | 10 | 133579899 | 133584218 | 4320  | 12  | -0.378442 | 0.041324 | 133579611 | 133580188 | 133583877 | 13358456: |
| 295 NA18572 | [2515685 chr11 | 11 | 47045     | 92430     | 45386 | 66  | -0.555187 | 0.017565 | 43964     | 50126     | 89349     | 9747C     |
| 296 NA18572 | [2515685 chr11 | 11 | 2840307   | 2842410   | 2104  | 3   | 0.506733  | 0.08647  | 2839959   | 2840656   | 2841856   | 284296:   |
| 297 NA18572 | [2515685 chr11 | 11 | 3628748   | 3632795   | 4048  | 6   | -2.46862  | 0.088958 | 3625722   | 3631775   | 3632594   | 363299:   |
| 298 NA18572 | [2515685 chr11 | 11 | 4924831   | 4932599   | 7769  | 8   | -2.545397 | 0.087085 | 4924403   | 4925260   | 4931948   | 493325:   |
| 299 NA18572 | [2515685 chr11 | 11 | 5717038   | 5722026   | 4989  | 3   | 2.6505    | 0.137285 | 5716660   | 5717416   | 5718945   | 572548:   |
| 300 NA18572 | [2515685 chr11 | 11 | 5741269   | 5765993   | 24725 | 33  | 1.23007   | 0.035837 | 5741059   | 5741480   | 5765632   | 576635:   |
| 301 NA18572 | [2515685 chr11 | 11 | 11780222  | 11782174  | 1953  | 2   | -0.649115 | 0.100336 | 11779958  | 11780486  | 11781057  | 1178329:  |
| 302 NA18572 | [2515685 chr11 | 11 | 11831868  | 11833089  | 1222  | 2   | 0.914325  | 0.121495 | 11831412  | 11832324  | 11832853  | 1183332:  |
| 303 NA18572 | [2515685 chr11 | 11 | 18906905  | 18928671  | 21767 | 30  | 0.653226  | 0.027413 | 18906533  | 18907278  | 18928457  | 1892888:  |
| 304 NA18572 | [2515685 chr11 | 11 | 28965605  | 28969186  | 3582  | 5   | 3.245225  | 0.132363 | 28965284  | 28965927  | 28968702  | 2896967:  |
| 305 NA18572 | [2515685 chr11 | 11 | 48284073  | 48284771  | 699   | 2   | 0.863691  | 0.101806 | 48283862  | 48284285  | 48284572  | 4828497:  |
| 306 NA18572 | [2515685 chr11 | 11 | 48997072  | 49001951  | 4880  | 9   | 0.386952  | 0.050618 | 48996760  | 48997384  | 49001459  | 4900244:  |
| 307 NA18572 | [2515685 chr11 | 11 | 49667589  | 49715829  | 48241 | 34  | 0.489175  | 0.025908 | 49666851  | 49668327  | 49712748  | 4972198:  |
| 308 NA18572 | [2515685 chr11 | 11 | 58566484  | 58611261  | 44778 | 47  | 0.351016  | 0.021423 | 58566228  | 58566741  | 58610975  | 5861154:  |
| 309 NA18572 | [2515685 chr11 | 11 | 60721034  | 60777477  | 56444 | 74  | 0.576251  | 0.013456 | 60720112  | 60721956  | 60776810  | 6077814:  |
| 310 NA18572 | [2515685 chr11 | 11 | 81429351  | 81432255  | 2905  | 3   | -0.828511 | 0.09931  | 81427753  | 81430950  | 81432049  | 8143324:  |
| 311 NA18572 | [2515685 chr11 | 11 | 85981700  | 85984113  | 2414  | 3   | -2.037742 | 0.124304 | 85981147  | 85982254  | 85983791  | 8598443:  |
| 312 NA18572 | [2515685 chr11 | 11 | 88266938  | 88303948  | 37011 | 40  | 0.260421  | 0.02385  | 88266424  | 88267453  | 88303762  | 8830413:  |
| 313 NA18572 | [2515685 chr11 | 11 | 89184898  | 89189792  | 4895  | 5   | 0.710788  | 0.07899  | 89184243  | 89185554  | 89189177  | 8919040:  |
| 314 NA18572 | [2515685 chr11 | 11 | 89260124  | 89266247  | 6124  | 10  | -0.257795 | 0.047204 | 89259811  | 89260437  | 89265993  | 8926650:  |
| 315 NA18572 | [2515685 chr11 | 11 | 106744846 | 106751052 | 6207  | 9   | -0.569825 | 0.058355 | 106744561 | 106745131 | 106747971 | 10675483: |
| 316 NA18572 | [2515685 chr11 | 11 | 134107699 | 134112290 | 4592  | 5   | 0.824693  | 0.074061 | 134106591 | 134108808 | 134111845 | 13411273: |
| 317 NA18572 | [2515685 chr12 | 12 | 398598    | 404873    | 6276  | 14  | -0.278694 | 0.025433 | 398035    | 399161    | 401600    | 408146:   |
| 318 NA18572 | [2515685 chr12 | 12 | 736840    | 744802    | 7963  | 9   | 0.791155  | 0.052063 | 736616    | 737064    | 744211    | 745394:   |
| 319 NA18572 | [2515685 chr12 | 12 | 2112534   | 2127044   | 14511 | 15  | 0.521033  | 0.038753 | 2109107   | 2115961   | 2126809   | 212727:   |
| 320 NA18572 | [2515685 chr12 | 12 | 6113530   | 6117052   | 3523  | 3   | 0.487746  | 0.096838 | 6111640   | 6115421   | 6116289   | 611781:   |
| 321 NA18572 | [2515685 chr12 | 12 | 8258615   | 8270350   | 11736 | 24  | -0.342626 | 0.024887 | 8258187   | 8259044   | 8269654   | 827104:   |
| 322 NA18572 | [2515685 chr12 | 12 | 9439936   | 9445623   | 5688  | 9   | 0.459686  | 0.044772 | 9439574   | 9440298   | 9445247   | 944600:   |
| 323 NA18572 | [2515685 chr12 | 12 | 9524239   | 9526454   | 2216  | 2   | 0.700506  | 0.108468 | 9523968   | 9524510   | 9526036   | 952687:   |
| 324 NA18572 | [2515685 chr12 | 12 | 9527659   | 9610804   | 83146 | 91  | 0.996772  | 0.018534 | 9526872   | 9528447   | 9610082   | 961152:   |
| 325 NA18572 | [2515685 chr12 | 12 | 9614408   | 9624971   | 10564 | 12  | 0.569053  | 0.044208 | 9613514   | 9615302   | 9623223   | 962672:   |
| 326 NA18572 | [2515685 chr12 | 12 | 11398049  | 11463223  | 65175 | 66  | -0.291154 | 0.018563 | 11397507  | 11398591  | 11459990  | 1146645:  |
| 327 NA18572 | [2515685 chr12 | 12 | 31155331  | 31244780  | 89450 | 84  | 0.63645   | 0.017808 | 31155092  | 31155571  | 31244217  | 3124534:  |
| 328 NA18572 | [2515685 chr12 | 12 | 78656134  | 78665261  | 9128  | 9   | -0.408918 | 0.054068 | 78654687  | 78657582  | 78664736  | 7866578:  |
| 329 NA18572 | [2515685 chr12 | 12 | 128864324 | 128869047 | 4724  | 14  | -0.250711 | 0.026207 | 128863938 | 128864711 | 128867605 | 12887048: |
| 330 NA18572 | [2515685 chr12 | 12 | 130257877 | 130259876 | 2000  | 3   | -0.489234 | 0.086007 | 130257493 | 130258262 | 130259649 | 13026010: |
| 331 NA18572 | [2515685 chr12 | 12 | 130798727 | 130802870 | 4144  | 5   | -0.722696 | 0.062133 | 130798268 | 130799187 | 130801345 | 13080439: |
| 332 NA18572 | [2515685 chr12 | 12 | 131046250 | 131046750 | 501   | 2   | 1.035181  | 0.132458 | 131046129 | 131046371 | 131046551 | 13104694: |
| 333 NA18572 | [2515685 chr13 | 13 | 25947233  | 25950398  | 3166  | 3   | 2.724763  | 0.136265 | 25946194  | 25948272  | 25949415  | 2595138:  |
| 334 NA18572 | [2515685 chr13 | 13 | 33029575  | 33043421  | 13847 | 9   | 0.856244  | 0.057363 | 33000262  | 33034253  | 33042925  | 3304391:  |
| 335 NA18572 | [2515685 chr13 | 13 | 69633905  | 69673289  | 39385 | 42  | 0.740661  | 0.024571 | 69633412  | 69634399  | 69672985  | 6967359:  |
| 336 NA18572 | [2515685 chr13 | 13 | 103075043 | 103076899 | 1857  | 3   | -0.825001 | 0.087915 | 103074622 | 103075465 | 103076435 | 10307736: |
| 337 NA18572 | [2515685 chr13 | 13 | 109216120 | 109217089 | 970   | 4   | -0.491355 | 0.063234 | 109216090 | 109216150 | 109216885 | 10921729: |
| 338 NA18572 | [2515685 chr13 | 13 | 113079647 | 113086816 | 7170  | 3   | 0.536838  | 0.086738 | 113078890 | 113080404 | 113082138 | 11309434: |
| 339 NA18572 | [2515685 chr14 | 14 | 18527136  | 18542743  | 15608 | 7   | -0.697945 | 0.058414 | 18526373  | 18527899  | 18541619  | 1854386:  |

|             |                |    |           |           |        |     |           |          |           |           |           |          |
|-------------|----------------|----|-----------|-----------|--------|-----|-----------|----------|-----------|-----------|-----------|----------|
| 340 NA18572 | [2515685 chr14 | 14 | 47402983  | 47404156  | 1174   | 3   | -0.43426  | 0.086121 | 47402773  | 47403194  | 47403971  | 4740434  |
| 341 NA18572 | [2515685 chr14 | 14 | 73070288  | 73084642  | 14355  | 16  | -0.310074 | 0.044128 | 73068747  | 73071829  | 73083193  | 7308609  |
| 342 NA18572 | [2515685 chr15 | 15 | 18817575  | 18888948  | 71374  | 79  | -0.445776 | 0.017002 | 18817092  | 18818059  | 18886645  | 1889275  |
| 343 NA18572 | [2515685 chr15 | 15 | 18982174  | 18982857  | 684    | 4   | -0.413461 | 0.051104 | 18981996  | 18982352  | 18982746  | 1898296  |
| 344 NA18572 | [2515685 chr15 | 15 | 19090947  | 19217756  | 126810 | 163 | -0.289587 | 0.011257 | 19090386  | 19091509  | 19217437  | 1921807  |
| 345 NA18572 | [2515685 chr15 | 15 | 19338943  | 19460889  | 121947 | 137 | -0.279624 | 0.012181 | 19338211  | 19339675  | 19460583  | 1946119  |
| 346 NA18572 | [2515685 chr15 | 15 | 19766478  | 19793998  | 27521  | 31  | -0.306601 | 0.023081 | 19765673  | 19767284  | 19792901  | 1979509  |
| 347 NA18572 | [2515685 chr15 | 15 | 19805080  | 20094951  | 289872 | 286 | -0.344014 | 0.008765 | 19804866  | 19805294  | 20092648  | 2019778  |
| 348 NA18572 | [2515685 chr15 | 15 | 20940396  | 20940987  | 592    | 4   | -0.413461 | 0.051104 | 20940218  | 20940574  | 20940968  | 2094100  |
| 349 NA18572 | [2515685 chr15 | 15 | 21227559  | 21228686  | 1128   | 6   | -0.35326  | 0.042495 | 21227472  | 21227646  | 21228667  | 2122870  |
| 350 NA18572 | [2515685 chr15 | 15 | 21606753  | 21614601  | 7849   | 7   | 0.739943  | 0.063305 | 21606459  | 21607047  | 21612298  | 2163669  |
| 351 NA18572 | [2515685 chr15 | 15 | 23482566  | 23483671  | 1106   | 2   | 0.625957  | 0.083182 | 23482224  | 23482908  | 23483437  | 2348390  |
| 352 NA18572 | [2515685 chr15 | 15 | 24986053  | 24992250  | 6198   | 7   | 0.734393  | 0.061571 | 24985426  | 24986680  | 24991680  | 2499282  |
| 353 NA18572 | [2515685 chr15 | 15 | 28182485  | 28214153  | 31669  | 64  | -0.353633 | 0.015445 | 28182045  | 28182925  | 28213965  | 2821434  |
| 354 NA18572 | [2515685 chr15 | 15 | 28457108  | 28473749  | 16642  | 35  | -0.345473 | 0.020336 | 28456826  | 28457390  | 28473311  | 2847418  |
| 355 NA18572 | [2515685 chr15 | 15 | 28651493  | 28682435  | 30943  | 62  | -0.319122 | 0.015593 | 28651042  | 28651945  | 28681552  | 2868331  |
| 356 NA18572 | [2515685 chr15 | 15 | 30483175  | 30516012  | 32838  | 63  | -0.339123 | 0.01595  | 30482988  | 30483363  | 30514645  | 3051738  |
| 357 NA18572 | [2515685 chr15 | 15 | 32469460  | 32653924  | 184465 | 186 | 0.261072  | 0.009683 | 32469063  | 32469858  | 32653683  | 3265416  |
| 358 NA18572 | [2515685 chr15 | 15 | 49408022  | 49410120  | 2099   | 2   | -0.527626 | 0.101493 | 49406890  | 49409154  | 49409717  | 4941052  |
| 359 NA18572 | [2515685 chr15 | 15 | 68815341  | 68840079  | 24739  | 28  | -0.732873 | 0.029808 | 68814996  | 68815687  | 68839290  | 6884086  |
| 360 NA18572 | [2515685 chr15 | 15 | 82333041  | 82335194  | 2154   | 2   | -0.707319 | 0.10701  | 82332284  | 82333799  | 82334729  | 8233566  |
| 361 NA18572 | [2515685 chr15 | 15 | 98234084  | 98240716  | 6633   | 8   | 0.829213  | 0.061404 | 98233842  | 98234327  | 98239350  | 9824208  |
| 362 NA18572 | [2515685 chr15 | 15 | 100109640 | 100122682 | 13043  | 98  | 0.774186  | 0.011833 | 100108905 | 100110376 | 100122315 | 10012305 |
| 363 NA18572 | [2515685 chr15 | 15 | 100219889 | 100266513 | 46625  | 67  | -0.566789 | 0.017357 | 100217384 | 100222192 | 100264210 | 10026919 |
| 364 NA18572 | [2515685 chr16 | 16 | 5287117   | 5290631   | 3515   | 2   | 1.074456  | 0.136389 | 5286149   | 5288085   | 5288751   | 529327   |
| 365 NA18572 | [2515685 chr16 | 16 | 32159898  | 32160377  | 480    | 2   | -1.612369 | 0.093826 | 32159453  | 32160343  | 32160346  | 3216040  |
| 366 NA18572 | [2515685 chr16 | 16 | 32210096  | 32219640  | 9545   | 19  | 0.289831  | 0.026536 | 32209551  | 32210641  | 32219531  | 3221974  |
| 367 NA18572 | [2515685 chr16 | 16 | 32606692  | 32607163  | 472    | 2   | -1.612369 | 0.093826 | 32606661  | 32606724  | 32606727  | 3260759  |
| 368 NA18572 | [2515685 chr16 | 16 | 33100875  | 33101346  | 472    | 2   | -1.612372 | 0.093826 | 33100438  | 33101312  | 33101315  | 3310137  |
| 369 NA18572 | [2515685 chr16 | 16 | 33157406  | 33157879  | 474    | 2   | -1.612369 | 0.093826 | 33156967  | 33157845  | 33157848  | 3315791  |
| 370 NA18572 | [2515685 chr16 | 16 | 33207215  | 33217055  | 9841   | 18  | 0.293125  | 0.027598 | 33206951  | 33207480  | 33216946  | 3321716  |
| 371 NA18572 | [2515685 chr16 | 16 | 34321826  | 34609073  | 287248 | 322 | -0.426804 | 0.008306 | 34317185  | 34323706  | 34607193  | 3461732  |
| 372 NA18572 | [2515685 chr16 | 16 | 54353711  | 54362962  | 9252   | 10  | -0.367403 | 0.048923 | 54353419  | 54354004  | 54362223  | 5436370  |
| 373 NA18572 | [2515685 chr16 | 16 | 54365075  | 54380125  | 15051  | 15  | -0.486285 | 0.036665 | 54364721  | 54365430  | 54379862  | 5438038  |
| 374 NA18572 | [2515685 chr16 | 16 | 54401577  | 54403491  | 1915   | 2   | 0.661472  | 0.111389 | 54401078  | 54402076  | 54402534  | 5440444  |
| 375 NA18572 | [2515685 chr16 | 16 | 57204541  | 57207585  | 3045   | 3   | 3.960974  | 0.177976 | 57204170  | 57204913  | 57206938  | 5720823  |
| 376 NA18572 | [2515685 chr16 | 16 | 68709986  | 68753825  | 43840  | 49  | -0.269854 | 0.020564 | 68709671  | 68710302  | 68753428  | 6875422  |
| 377 NA18572 | [2515685 chr16 | 16 | 70642642  | 70667780  | 25139  | 19  | -0.507726 | 0.034528 | 70642262  | 70643022  | 70667434  | 7066812  |
| 378 NA18572 | [2515685 chr16 | 16 | 76932229  | 76942282  | 10054  | 8   | 0.618418  | 0.04989  | 76931263  | 76933196  | 76941602  | 7694296  |
| 379 NA18572 | [2515685 chr16 | 16 | 84561410  | 84567498  | 6089   | 16  | 0.291127  | 0.038482 | 84561136  | 84561685  | 84567216  | 8456778  |
| 380 NA18572 | [2515685 chr16 | 16 | 86669849  | 86672366  | 2518   | 2   | -2.547306 | 0.152443 | 86669288  | 86670411  | 86671217  | 8667351  |
| 381 NA18572 | [2515685 chr16 | 16 | 88710612  | 88712266  | 1655   | 8   | 0.447212  | 0.058612 | 88710473  | 88710751  | 88712200  | 8871233  |
| 382 NA18572 | [2515685 chr17 | 17 | 14984685  | 14999596  | 14912  | 15  | -2.198261 | 0.059688 | 14984106  | 14985264  | 14999318  | 1499987  |
| 383 NA18572 | [2515685 chr17 | 17 | 18331739  | 18332345  | 607    | 2   | -0.79853  | 0.104274 | 18331509  | 18331970  | 18331978  | 1833271  |
| 384 NA18572 | [2515685 chr17 | 17 | 18941753  | 18942703  | 951    | 2   | -0.965887 | 0.089716 | 18941296  | 18942211  | 18942231  | 1894317  |
| 385 NA18572 | [2515685 chr17 | 17 | 18943320  | 18948307  | 4988   | 12  | -0.445737 | 0.037429 | 18943176  | 18943465  | 18948015  | 1894860  |
| 386 NA18572 | [2515685 chr17 | 17 | 18997456  | 18998406  | 951    | 2   | -0.965886 | 0.089716 | 18996984  | 18997929  | 18997948  | 1899886  |
| 387 NA18572 | [2515685 chr17 | 17 | 19067789  | 19068740  | 952    | 2   | -0.965884 | 0.089715 | 19067331  | 19068248  | 19068268  | 1906921  |
| 388 NA18572 | [2515685 chr17 | 17 | 19071233  | 19074342  | 3110   | 7   | -0.470816 | 0.044912 | 19071187  | 19071280  | 19074050  | 1907463  |
| 389 NA18572 | [2515685 chr17 | 17 | 20299935  | 20300531  | 597    | 2   | -0.79853  | 0.104274 | 20299568  | 20300303  | 20300311  | 2030075  |
| 390 NA18572 | [2515685 chr17 | 17 | 21826349  | 21834752  | 8404   | 7   | 0.359784  | 0.045123 | 21826238  | 21826461  | 21833710  | 2183579  |
| 391 NA18572 | [2515685 chr17 | 17 | 21942843  | 21955530  | 12688  | 21  | -0.336616 | 0.031605 | 21942618  | 21943068  | 21955191  | 2195586  |
| 392 NA18572 | [2515685 chr17 | 17 | 31437744  | 31439351  | 1608   | 3   | 0.493953  | 0.063208 | 31437542  | 31437946  | 31439129  | 3143957  |
| 393 NA18572 | [2515685 chr17 | 17 | 31451472  | 31457488  | 6017   | 9   | 0.456837  | 0.046502 | 31451142  | 31451802  | 31457079  | 3145789  |
| 394 NA18572 | [2515685 chr17 | 17 | 31531920  | 31568299  | 36380  | 63  | 0.379453  | 0.014457 | 31531695  | 31532146  | 31567907  | 3156869  |

|             |                |    |          |          |        |     |           |          |          |          |          |          |
|-------------|----------------|----|----------|----------|--------|-----|-----------|----------|----------|----------|----------|----------|
| 395 NA18572 | [2515685 chr17 | 17 | 31619971 | 31666985 | 47015  | 70  | 0.36425   | 0.012963 | 31619739 | 31620204 | 31666703 | 31667261 |
| 396 NA18572 | [2515685 chr17 | 17 | 32829500 | 32833231 | 3732   | 5   | 0.738631  | 0.073823 | 32828825 | 32830175 | 32832670 | 32833791 |
| 397 NA18572 | [2515685 chr17 | 17 | 33383931 | 33408561 | 24631  | 34  | -0.298436 | 0.022333 | 33382917 | 33384945 | 33408077 | 33409041 |
| 398 NA18572 | [2515685 chr17 | 17 | 33425145 | 33430791 | 5647   | 10  | -0.766111 | 0.047337 | 33424532 | 33425759 | 33428591 | 33529291 |
| 399 NA18572 | [2515685 chr17 | 17 | 33604501 | 33639547 | 35047  | 44  | 0.320671  | 0.021918 | 33603951 | 33605052 | 33638405 | 33640681 |
| 400 NA18572 | [2515685 chr17 | 17 | 33642193 | 33659558 | 17366  | 29  | -0.568641 | 0.02833  | 33641874 | 33642513 | 33658997 | 33660111 |
| 401 NA18572 | [2515685 chr17 | 17 | 40929350 | 41006614 | 77265  | 124 | 0.26236   | 0.01177  | 40928640 | 40930061 | 41006215 | 41007011 |
| 402 NA18572 | [2515685 chr17 | 17 | 41741357 | 41987438 | 246082 | 298 | 0.553687  | 0.00573  | 41740846 | 41741868 | 41987182 | 41987691 |
| 403 NA18572 | [2515685 chr17 | 17 | 41991727 | 42137410 | 145684 | 136 | 0.553687  | 0.00573  | 41991459 | 41991996 | 42135210 | 42141941 |
| 404 NA18572 | [2515685 chr17 | 17 | 42446566 | 42487040 | 40475  | 70  | 0.291628  | 0.015425 | 42446148 | 42446985 | 42486638 | 42487441 |
| 405 NA18572 | [2515685 chr17 | 17 | 42970703 | 42987924 | 17222  | 31  | -0.505605 | 0.026905 | 42970185 | 42971221 | 42987641 | 42988201 |
| 406 NA18572 | [2515685 chr17 | 17 | 42988804 | 43026670 | 37867  | 54  | 0.282003  | 0.019905 | 42988208 | 42989400 | 43025568 | 43027771 |
| 407 NA18572 | [2515685 chr17 | 17 | 54718891 | 54720406 | 1516   | 2   | -0.838682 | 0.121618 | 54718493 | 54719289 | 54719841 | 54720971 |
| 408 NA18572 | [2515685 chr17 | 17 | 55806252 | 55811196 | 4945   | 2   | -0.690008 | 0.115805 | 55687363 | 55808452 | 55808996 | 55828971 |
| 409 NA18572 | [2515685 chr17 | 17 | 60269002 | 60346613 | 77612  | 119 | 0.259069  | 0.012168 | 60268357 | 60269648 | 60345268 | 60347951 |
| 410 NA18572 | [2515685 chr18 | 18 | 46430355 | 46515932 | 85578  | 2   | -0.451099 | 0.08087  | 46312475 | 46434937 | 46511350 | 46702831 |
| 411 NA18572 | [2515685 chr18 | 18 | 61874791 | 61883105 | 8315   | 9   | -0.823985 | 0.052266 | 61874483 | 61875100 | 61882738 | 61883471 |
| 412 NA18572 | [2515685 chr18 | 18 | 61917747 | 61920171 | 2425   | 4   | 1.972972  | 0.119151 | 61917522 | 61917973 | 61919646 | 61920691 |
| 413 NA18572 | [2515685 chr18 | 18 | 63110008 | 63117706 | 7699   | 9   | -0.719282 | 0.053324 | 63109644 | 63110373 | 63116010 | 63119401 |
| 414 NA18572 | [2515685 chr18 | 18 | 68583626 | 68585677 | 2052   | 2   | -0.530936 | 0.102021 | 68583275 | 68583977 | 68585288 | 68586061 |
| 415 NA18572 | [2515685 chr18 | 18 | 74230393 | 74234275 | 3883   | 31  | -0.458694 | 0.016235 | 74229835 | 74230952 | 74234139 | 74234411 |
| 416 NA18572 | [2515685 chr18 | 18 | 74373005 | 74376367 | 3363   | 7   | 0.756162  | 0.034904 | 74372064 | 74373947 | 74375833 | 74376901 |
| 417 NA18572 | [2515685 chr18 | 18 | 74392800 | 74398225 | 5426   | 4   | 0.496546  | 0.076241 | 74390826 | 74394774 | 74397790 | 74398661 |
| 418 NA18572 | [2515685 chr19 | 19 | 76779    | 122499   | 45721  | 68  | -0.541531 | 0.017403 | 73262    | 79306    | 119972   | 128091   |
| 419 NA18572 | [2515685 chr19 | 19 | 310414   | 312953   | 2540   | 14  | -0.503352 | 0.037531 | 309687   | 311142   | 312913   | 312991   |
| 420 NA18572 | [2515685 chr19 | 19 | 1200296  | 1202522  | 2227   | 3   | 0.495611  | 0.088141 | 1199725  | 1200868  | 1202197  | 1202841  |
| 421 NA18572 | [2515685 chr19 | 19 | 8708780  | 8763535  | 54756  | 94  | 0.497893  | 0.010146 | 8708296  | 8709264  | 8763160  | 8763911  |
| 422 NA18572 | [2515685 chr19 | 19 | 23007904 | 23013841 | 5938   | 6   | 0.707828  | 0.069195 | 22990964 | 23010431 | 23013525 | 23014151 |
| 423 NA18572 | [2515685 chr19 | 19 | 23108259 | 23109446 | 1188   | 2   | 0.938511  | 0.110858 | 23107903 | 23108615 | 23108879 | 23110011 |
| 424 NA18572 | [2515685 chr19 | 19 | 39419837 | 39421349 | 1513   | 3   | 0.500206  | 0.09447  | 39419616 | 39420059 | 39421018 | 39421681 |
| 425 NA18572 | [2515685 chr19 | 19 | 41450187 | 41493612 | 43426  | 28  | 0.357398  | 0.021333 | 41421528 | 41452714 | 41491085 | 41497851 |
| 426 NA18572 | [2515685 chr19 | 19 | 42450473 | 42486383 | 35911  | 32  | 0.354204  | 0.018558 | 42413600 | 42453000 | 42486279 | 42486481 |
| 427 NA18572 | [2515685 chr19 | 19 | 53100142 | 53151974 | 51833  | 98  | -0.317841 | 0.009415 | 53098980 | 53101305 | 53151638 | 53152311 |
| 428 NA18572 | [2515685 chr19 | 19 | 55285877 | 55336157 | 50281  | 104 | -0.308248 | 0.009085 | 55285730 | 55286025 | 55335244 | 55337071 |
| 429 NA18572 | [2515685 chr19 | 19 | 56826070 | 56840752 | 14683  | 14  | -0.5769   | 0.03978  | 56825810 | 56826331 | 56840372 | 56841131 |
| 430 NA18572 | [2515685 chr19 | 19 | 58169057 | 58171564 | 2508   | 2   | 0.480533  | 0.092524 | 58168791 | 58169324 | 58171021 | 58172101 |
| 431 NA18572 | [2515685 chr19 | 19 | 58210435 | 58244458 | 34024  | 26  | -0.680563 | 0.029948 | 58209863 | 58211007 | 58243893 | 58245021 |
| 432 NA18572 | [2515685 chr19 | 19 | 59247755 | 59252061 | 4307   | 5   | 0.727112  | 0.071054 | 59246427 | 59249084 | 59251854 | 59252261 |
| 433 NA18572 | [2515685 chr19 | 19 | 60958920 | 60976029 | 17110  | 15  | -0.464635 | 0.038    | 60957933 | 60959907 | 60975748 | 60976311 |
| 434 NA18572 | [2515685 chr20 | 20 | 1511097  | 1532477  | 21381  | 26  | -1.395339 | 0.041796 | 1510534  | 1511660  | 1532182  | 1532771  |
| 435 NA18572 | [2515685 chr20 | 20 | 26136817 | 26137613 | 797    | 2   | 0.618358  | 0.114257 | 26136626 | 26137008 | 26137444 | 26137781 |
| 436 NA18572 | [2515685 chr20 | 20 | 36488187 | 36489436 | 1250   | 2   | -0.861127 | 0.113569 | 36487773 | 36488601 | 36489140 | 36489731 |
| 437 NA18572 | [2515685 chr20 | 20 | 45883995 | 45889273 | 5279   | 6   | -0.280637 | 0.055291 | 45883696 | 45884294 | 45888652 | 45889891 |
| 438 NA18572 | [2515685 chr20 | 20 | 61770772 | 61773337 | 2566   | 14  | 0.353602  | 0.040809 | 61770072 | 61771473 | 61772214 | 61774461 |
| 439 NA18572 | [2515685 chr20 | 20 | 62066380 | 62068214 | 1835   | 8   | 0.937051  | 0.04971  | 62066146 | 62066615 | 62067671 | 62068751 |
| 440 NA18572 | [2515685 chr20 | 20 | 62113559 | 62121334 | 7776   | 22  | -0.432086 | 0.034032 | 62113491 | 62113628 | 62120828 | 62121841 |
| 441 NA18572 | [2515685 chr21 | 21 | 21348593 | 21350117 | 1525   | 2   | -0.783472 | 0.112086 | 21348175 | 21349011 | 21349666 | 21350561 |
| 442 NA18572 | [2515685 chr21 | 21 | 22576580 | 22586733 | 10154  | 10  | -2.903193 | 0.092382 | 22576051 | 22577109 | 22586474 | 22586991 |
| 443 NA18572 | [2515685 chr22 | 22 | 17032140 | 17129139 | 97000  | 146 | -0.365355 | 0.010913 | 17031480 | 17032801 | 17128821 | 17129451 |
| 444 NA18572 | [2515685 chr22 | 22 | 17221797 | 17249803 | 28007  | 64  | -0.357479 | 0.016527 | 17221464 | 17222130 | 17249433 | 17250171 |
| 445 NA18572 | [2515685 chr22 | 22 | 18273943 | 18276450 | 2508   | 2   | -0.483355 | 0.089002 | 18273512 | 18274375 | 18274942 | 18277951 |
| 446 NA18572 | [2515685 chr22 | 22 | 18689528 | 18734175 | 44648  | 52  | -0.3821   | 0.018121 | 18686307 | 18692211 | 18733858 | 18734491 |
| 447 NA18572 | [2515685 chr22 | 22 | 18876047 | 18881586 | 5540   | 3   | -0.588366 | 0.057371 | 18875675 | 18876420 | 18878903 | 18934141 |
| 448 NA18572 | [2515685 chr22 | 22 | 18947502 | 19030052 | 82551  | 104 | -0.348567 | 0.013207 | 18947184 | 18947821 | 19029673 | 19030431 |
| 449 NA18572 | [2515685 chr22 | 22 | 19791149 | 19793944 | 2796   | 7   | -0.37762  | 0.054165 | 19791060 | 19791239 | 19793875 | 19794011 |

|             |                |    |           |           |        |     |           |          |           |           |           |          |
|-------------|----------------|----|-----------|-----------|--------|-----|-----------|----------|-----------|-----------|-----------|----------|
| 450 NA18572 | [2515685 chr22 | 22 | 19830324  | 19880162  | 49839  | 71  | -0.371885 | 0.015441 | 19829940  | 19830709  | 19879848  | 19880471 |
| 451 NA18572 | [2515685 chr22 | 22 | 19973569  | 20020668  | 47100  | 72  | -0.379022 | 0.015315 | 19972287  | 19974851  | 20020380  | 20020957 |
| 452 NA18572 | [2515685 chr22 | 22 | 20637684  | 20780532  | 142849 | 143 | 0.39807   | 0.012809 | 20637434  | 20637935  | 20777849  | 21602449 |
| 453 NA18572 | [2515685 chr22 | 22 | 22611178  | 22615116  | 3939   | 3   | -0.523094 | 0.083519 | 22609725  | 22612631  | 22614886  | 22615349 |
| 454 NA18572 | [2515685 chr22 | 22 | 22683930  | 22690382  | 6453   | 5   | -1.194999 | 0.081189 | 22681309  | 22686552  | 22690146  | 22690619 |
| 455 NA18572 | [2515685 chr22 | 22 | 33619409  | 33622591  | 3183   | 4   | 0.713721  | 0.073509 | 33618939  | 33619879  | 33622541  | 33622649 |
| 456 NA18572 | [2515685 chr22 | 22 | 37683358  | 37711759  | 28402  | 27  | -1.158149 | 0.033551 | 37683063  | 37683653  | 37711022  | 37712499 |
| 457 NA18572 | [2515685 chr22 | 22 | 43418479  | 43419675  | 1197   | 2   | 0.517629  | 0.095124 | 43418051  | 43418907  | 43419378  | 43419979 |
| 458 NA18572 | [2515685 chrX  | 23 | 1979394   | 1983878   | 4485   | 15  | 0.568053  | 0.037336 | 1979134   | 1979654   | 1982685   | 1985079  |
| 459 NA18572 | [2515685 chrX  | 23 | 9182407   | 9192056   | 9650   | 13  | 0.638638  | 0.040218 | 9181838   | 9182977   | 9191527   | 9192589  |
| 460 NA18572 | [2515685 chrX  | 23 | 38340304  | 38343955  | 3652   | 2   | -2.095823 | 0.143917 | 38339963  | 38340645  | 38341288  | 38346629 |
| 461 NA18572 | [2515685 chrX  | 23 | 56677475  | 56690665  | 13191  | 31  | 0.454003  | 0.017752 | 56677130  | 56677820  | 56690311  | 56691019 |
| 462 NA18572 | [2515685 chrX  | 23 | 66907560  | 66912007  | 4448   | 2   | -2.767983 | 0.197335 | 66881715  | 66911529  | 66911837  | 66912179 |
| 463 NA18572 | [2515685 chrX  | 23 | 66912342  | 66913276  | 935    | 3   | -0.888004 | 0.102013 | 66912177  | 66912507  | 66913165  | 66913389 |
| 464 NA18572 | [2515685 chrX  | 23 | 83126803  | 83129348  | 2546   | 2   | -1.463189 | 0.256567 | 83126742  | 83126864  | 83126941  | 83131759 |
| 465 NA18572 | [2515685 chrX  | 23 | 115741949 | 115742309 | 361    | 2   | -0.651255 | 0.117781 | 115741862 | 115742036 | 115742232 | 11574238 |
| 466 NA18572 | [2515685 chrX  | 23 | 119787748 | 119844836 | 57089  | 83  | -0.661463 | 0.010657 | 119787006 | 119788491 | 119844499 | 11984517 |
| 467 NA18572 | [2515685 chrX  | 23 | 134569408 | 134625407 | 56000  | 104 | 0.419418  | 0.007517 | 134569294 | 134569522 | 134624877 | 13462593 |
| 468 NA18572 | [2515685 chrX  | 23 | 134645810 | 134698023 | 52214  | 106 | 0.419418  | 0.007517 | 134645280 | 134646341 | 134696803 | 13469924 |
| 469 NA18572 | [2515685 chrX  | 23 | 134750696 | 134755274 | 4579   | 10  | 0.374765  | 0.037241 | 134750516 | 134750876 | 134755112 | 13475543 |
| 470 NA18572 | [2515685 chrX  | 23 | 139811649 | 139834050 | 22402  | 39  | 0.276481  | 0.017025 | 139811533 | 139811766 | 139830081 | 13984227 |
| 471 NA18572 | [2515685 chrX  | 23 | 140386673 | 140392674 | 6002   | 5   | 0.453852  | 0.048175 | 140378397 | 140390642 | 140392501 | 14039284 |
| 472 NA18572 | [2515685 chrX  | 23 | 140409056 | 140413881 | 4826   | 4   | 0.453269  | 0.050464 | 140408882 | 140409230 | 140411067 | 14041669 |
| 473 NA18572 | [2515685 chrX  | 23 | 140500459 | 140510358 | 9900   | 14  | 0.34899   | 0.029417 | 140492162 | 140504428 | 140510308 | 14051040 |
| 474 NA18572 | [2515685 chrX  | 23 | 151904737 | 151918756 | 14020  | 23  | 0.26704   | 0.030407 | 151904371 | 151905104 | 151918417 | 15191909 |
| 475 NA18572 | [2515685 chrX  | 23 | 151918756 | 152045381 | 126626 | 122 | 0.613447  | 0.014605 | 151918417 | 151919096 | 152044543 | 15204622 |
| 476 NA18572 | [2515685 chrY  | 24 | 1979394   | 1983878   | 4485   | 15  | 0.568053  | 0.037336 | 1979134   | 1979654   | 1982685   | 1985079  |
| 477 NA18572 | [2515685 chrY  | 24 | 9213374   | 9983978   | 770605 | 764 | 0.251918  | 0.003542 | 9212424   | 9214325   | 9983856   | 9984107  |
| 478 NA18572 | [2515685 chrY  | 24 | 9987956   | 9993713   | 5758   | 16  | 0.251918  | 0.003542 | 9987758   | 9988154   | 9992681   | 9994749  |
| 479 NA18572 | [2515685 chrY  | 24 | 10326793  | 10340296  | 13504  | 7   | 0.328898  | 0.049331 | 10325529  | 10328058  | 10339804  | 10340789 |
| 480 NA18572 | [2515685 chrY  | 24 | 23628713  | 23649003  | 20291  | 38  | -0.378645 | 0.018025 | 23628548  | 23628879  | 23648757  | 23649249 |
| 481 NA18572 | [2515685 chrY  | 24 | 23716390  | 23748616  | 32227  | 65  | -0.381243 | 0.013515 | 23716144  | 23716636  | 23748451  | 23748789 |
| 482 NA18572 | [2515685 chrY  | 24 | 25258650  | 25285076  | 26427  | 53  | -0.398755 | 0.01628  | 25258209  | 25259092  | 25284830  | 25285329 |
| 483 NA18572 | [2515685 chrY  | 24 | 25341625  | 25366673  | 25049  | 45  | -0.402065 | 0.016887 | 25341379  | 25341871  | 25366508  | 25366839 |
| 1 NA12872   | [2515685 chr1  | 1  | 11483     | 71292     | 59810  | 92  | 0.251188  | 0.014924 | 11274     | 11692     | 70533     | 72052    |
| 2 NA12872   | [2515685 chr1  | 1  | 604821    | 612159    | 7339   | 6   | -1.315916 | 0.068406 | 604315    | 605328    | 610122    | 614196   |
| 3 NA12872   | [2515685 chr1  | 1  | 792154    | 799303    | 7150   | 11  | 0.655874  | 0.045488 | 791750    | 792558    | 798953    | 799659   |
| 4 NA12872   | [2515685 chr1  | 1  | 1207651   | 1209799   | 2149   | 2   | 0.591656  | 0.111662 | 1207264   | 1208038   | 1208915   | 1210689  |
| 5 NA12872   | [2515685 chr1  | 1  | 1853012   | 1854645   | 1634   | 2   | 1.776131  | 0.116599 | 1852616   | 1853409   | 1853816   | 1855479  |
| 6 NA12872   | [2515685 chr1  | 1  | 12829124  | 12850337  | 21214  | 32  | 0.302222  | 0.025437 | 12828579  | 12829669  | 12850101  | 12850579 |
| 7 NA12872   | [2515685 chr1  | 1  | 12884329  | 12886858  | 2530   | 4   | 0.45378   | 0.058793 | 12884224  | 12884434  | 12886536  | 12887189 |
| 8 NA12872   | [2515685 chr1  | 1  | 12893626  | 12905798  | 12173  | 15  | 0.270898  | 0.030798 | 12893265  | 12893988  | 12905600  | 12905991 |
| 9 NA12872   | [2515685 chr1  | 1  | 12995178  | 13001855  | 6678   | 9   | 0.251606  | 0.047976 | 12994551  | 12995806  | 13001230  | 13002489 |
| 10 NA12872  | [2515685 chr1  | 1  | 13140902  | 13153172  | 12271  | 13  | 0.284116  | 0.031951 | 13140631  | 13141174  | 13152811  | 13153539 |
| 11 NA12872  | [2515685 chr1  | 1  | 13159940  | 13162706  | 2767   | 4   | 0.478737  | 0.054556 | 13159618  | 13160263  | 13162361  | 13163049 |
| 12 NA12872  | [2515685 chr1  | 1  | 13380737  | 13383503  | 2767   | 4   | 0.478738  | 0.054556 | 13380415  | 13381060  | 13383163  | 13383849 |
| 13 NA12872  | [2515685 chr1  | 1  | 34770327  | 34780982  | 10656  | 14  | -0.631903 | 0.04216  | 34766123  | 34773595  | 34780581  | 34781389 |
| 14 NA12872  | [2515685 chr1  | 1  | 72478372  | 72524180  | 45809  | 36  | -2.015028 | 0.04115  | 72478140  | 72478604  | 72523661  | 72524709 |
| 15 NA12872  | [2515685 chr1  | 1  | 89188117  | 89190762  | 2646   | 5   | 1.621359  | 0.092051 | 89187764  | 89188470  | 89190458  | 89191069 |
| 16 NA12872  | [2515685 chr1  | 1  | 103827497 | 103834166 | 6670   | 16  | 0.329935  | 0.034256 | 103827175 | 103827820 | 103833999 | 10383433 |
| 17 NA12872  | [2515685 chr1  | 1  | 103848297 | 103864760 | 16464  | 24  | 0.439609  | 0.007733 | 103842566 | 103851565 | 103864592 | 10386492 |
| 18 NA12872  | [2515685 chr1  | 1  | 103874084 | 104015739 | 141656 | 228 | 0.439609  | 0.007733 | 103873944 | 103874224 | 104013178 | 10401830 |
| 19 NA12872  | [2515685 chr1  | 1  | 105728161 | 105735462 | 7302   | 8   | -0.984997 | 0.063123 | 105727820 | 105728503 | 105734532 | 10573639 |
| 20 NA12872  | [2515685 chr1  | 1  | 108444641 | 108449550 | 4910   | 9   | 0.673144  | 0.051358 | 108443817 | 108445466 | 108449224 | 10844987 |
| 21 NA12872  | [2515685 chr1  | 1  | 108514938 | 108565175 | 50238  | 59  | 0.295242  | 0.019696 | 108514864 | 108515012 | 108565023 | 10856532 |

|    |         |               |   |           |           |        |     |           |          |           |           |           |          |
|----|---------|---------------|---|-----------|-----------|--------|-----|-----------|----------|-----------|-----------|-----------|----------|
| 22 | NA12872 | [2515685 chr1 | 1 | 108638096 | 108688767 | 50672  | 60  | 0.299464  | 0.019431 | 108637939 | 108638254 | 108688693 | 10868884 |
| 23 | NA12872 | [2515685 chr1 | 1 | 112405902 | 112416691 | 10790  | 10  | 0.641656  | 0.049734 | 112405415 | 112406389 | 112416423 | 11241696 |
| 24 | NA12872 | [2515685 chr1 | 1 | 116874175 | 116915240 | 41066  | 51  | 0.389655  | 0.02021  | 116873908 | 116874442 | 116914887 | 11691559 |
| 25 | NA12872 | [2515685 chr1 | 1 | 120244720 | 120342752 | 98033  | 152 | 0.253821  | 0.011646 | 120243262 | 120246178 | 120342542 | 12034296 |
| 26 | NA12872 | [2515685 chr1 | 1 | 141964651 | 141981849 | 17199  | 51  | 0.302496  | 0.016156 | 141964562 | 141964740 | 141978581 | 14203010 |
| 27 | NA12872 | [2515685 chr1 | 1 | 142438646 | 142569435 | 130790 | 159 | 0.34022   | 0.011614 | 142438189 | 142439104 | 142568775 | 14257009 |
| 28 | NA12872 | [2515685 chr1 | 1 | 142744385 | 142745273 | 889    | 2   | 0.769791  | 0.114381 | 142743794 | 142744976 | 142745023 | 14274552 |
| 29 | NA12872 | [2515685 chr1 | 1 | 145091514 | 145109730 | 18217  | 58  | 0.298351  | 0.01532  | 145089695 | 145093333 | 145109552 | 14510990 |
| 30 | NA12872 | [2515685 chr1 | 1 | 145383992 | 145402904 | 18913  | 42  | 0.262082  | 0.017513 | 145383814 | 145384171 | 145401111 | 14540469 |
| 31 | NA12872 | [2515685 chr1 | 1 | 145546022 | 145564933 | 18912  | 41  | 0.262073  | 0.017764 | 145545844 | 145546201 | 145563140 | 14556672 |
| 32 | NA12872 | [2515685 chr1 | 1 | 145929568 | 145951531 | 21964  | 26  | 0.414361  | 0.02912  | 145929405 | 145929732 | 145951467 | 14595159 |
| 33 | NA12872 | [2515685 chr1 | 1 | 146328771 | 146344860 | 16090  | 49  | 0.29944   | 0.016984 | 146328485 | 146329057 | 146343057 | 14634666 |
| 34 | NA12872 | [2515685 chr1 | 1 | 149368571 | 149401669 | 33099  | 23  | 0.7256    | 0.032857 | 149368105 | 149369038 | 149399791 | 14940354 |
| 35 | NA12872 | [2515685 chr1 | 1 | 149573821 | 149583431 | 9611   | 5   | 0.928912  | 0.075321 | 149573460 | 149574182 | 149582912 | 14958395 |
| 36 | NA12872 | [2515685 chr1 | 1 | 158224068 | 158225480 | 1413   | 2   | 0.389382  | 0.060491 | 158223552 | 158224584 | 158225276 | 15822568 |
| 37 | NA12872 | [2515685 chr1 | 1 | 158231105 | 158232881 | 1777   | 2   | 0.389383  | 0.060491 | 158230227 | 158231984 | 158232676 | 15823308 |
| 38 | NA12872 | [2515685 chr1 | 1 | 158245896 | 158247672 | 1777   | 2   | 0.389384  | 0.060491 | 158245018 | 158246775 | 158247467 | 15824787 |
| 39 | NA12872 | [2515685 chr1 | 1 | 158253277 | 158255053 | 1777   | 2   | 0.389383  | 0.060491 | 158252398 | 158254156 | 158254848 | 15825525 |
| 40 | NA12872 | [2515685 chr1 | 1 | 193458391 | 193555075 | 96685  | 83  | 0.413246  | 0.016771 | 193458194 | 193458588 | 193554890 | 19355526 |
| 41 | NA12872 | [2515685 chr1 | 1 | 203245415 | 203247868 | 2454   | 2   | 1.103842  | 0.12026  | 203245018 | 203245812 | 203247578 | 20324815 |
| 42 | NA12872 | [2515685 chr1 | 1 | 220570241 | 220571400 | 1160   | 2   | 0.81502   | 0.107206 | 220569940 | 220570543 | 220571101 | 22057170 |
| 43 | NA12872 | [2515685 chr1 | 1 | 243009520 | 243011368 | 1849   | 3   | -0.514369 | 0.084957 | 243008430 | 243010610 | 243011204 | 24301153 |
| 44 | NA12872 | [2515685 chr1 | 1 | 244872415 | 244874098 | 1684   | 5   | -0.367046 | 0.069068 | 244872245 | 244872585 | 244873799 | 24487439 |
| 45 | NA12872 | [2515685 chr2 | 2 | 296456    | 298925    | 2470   | 8   | -0.339956 | 0.05364  | 296213    | 296699    | 298661    | 299185   |
| 46 | NA12872 | [2515685 chr2 | 2 | 388500    | 390704    | 2205   | 6   | 0.446795  | 0.060278 | 387915    | 389086    | 390173    | 391236   |
| 47 | NA12872 | [2515685 chr2 | 2 | 35896479  | 35905930  | 9452   | 3   | -0.834902 | 0.083032 | 35879425  | 35899430  | 35902979  | 3590982  |
| 48 | NA12872 | [2515685 chr2 | 2 | 36195731  | 36196926  | 1196   | 2   | 0.523422  | 0.098727 | 36195345  | 36196117  | 36196623  | 36197231 |
| 49 | NA12872 | [2515685 chr2 | 2 | 37869648  | 37913298  | 43651  | 45  | 0.302489  | 0.020795 | 37869077  | 37870220  | 37912585  | 3791401  |
| 50 | NA12872 | [2515685 chr2 | 2 | 56563626  | 56567381  | 3756   | 2   | 2.860752  | 0.197878 | 56565559  | 56566577  | 56567035  | 5656772  |
| 51 | NA12872 | [2515685 chr2 | 2 | 61675589  | 61676777  | 1189   | 2   | 1.973213  | 0.158517 | 61675200  | 61675979  | 61676468  | 6167708  |
| 52 | NA12872 | [2515685 chr2 | 2 | 73945377  | 73946969  | 1593   | 3   | 0.297444  | 0.057078 | 73945149  | 73945606  | 73946724  | 7394721  |
| 53 | NA12872 | [2515685 chr2 | 2 | 91334052  | 91347855  | 13804  | 18  | 0.25714   | 0.034695 | 91333845  | 91334260  | 91347601  | 9134811  |
| 54 | NA12872 | [2515685 chr2 | 2 | 91383591  | 91391252  | 7662   | 18  | 0.264236  | 0.031808 | 91383374  | 91383809  | 91391019  | 9139148  |
| 55 | NA12872 | [2515685 chr2 | 2 | 97184386  | 97189733  | 5348   | 2   | -0.724724 | 0.101597 | 97182781  | 97185992  | 97186782  | 9719672  |
| 56 | NA12872 | [2515685 chr2 | 2 | 97613796  | 97614932  | 1137   | 2   | 0.955256  | 0.118901 | 97613553  | 97614040  | 97614467  | 9761539  |
| 57 | NA12872 | [2515685 chr2 | 2 | 106338419 | 106344320 | 5902   | 7   | -0.489923 | 0.061863 | 106337769 | 106339069 | 106344055 | 10634458 |
| 58 | NA12872 | [2515685 chr2 | 2 | 108313968 | 108314875 | 908    | 2   | 0.746683  | 0.106077 | 108313664 | 108314272 | 108314680 | 10831507 |
| 59 | NA12872 | [2515685 chr2 | 2 | 123193457 | 123199443 | 5987   | 5   | -0.685893 | 0.066583 | 123193121 | 123193793 | 123198757 | 12320012 |
| 60 | NA12872 | [2515685 chr2 | 2 | 126159437 | 126168349 | 8913   | 3   | -0.891156 | 0.085573 | 126158494 | 126160381 | 126168048 | 12616865 |
| 61 | NA12872 | [2515685 chr2 | 2 | 130420955 | 130466208 | 45254  | 53  | -0.274508 | 0.019656 | 130420630 | 130421281 | 130465586 | 13046683 |
| 62 | NA12872 | [2515685 chr2 | 2 | 132274529 | 132321431 | 46903  | 54  | -0.255834 | 0.018608 | 132273872 | 132275187 | 132321248 | 13232161 |
| 63 | NA12872 | [2515685 chr2 | 2 | 132871605 | 132873051 | 1447   | 2   | 1.311784  | 0.139564 | 132871306 | 132871904 | 132872791 | 13287331 |
| 64 | NA12872 | [2515685 chr2 | 2 | 142063628 | 142065419 | 1792   | 3   | 0.965011  | 0.098758 | 142063344 | 142063912 | 142065134 | 14206570 |
| 65 | NA12872 | [2515685 chr2 | 2 | 153495552 | 153499409 | 3858   | 2   | 0.739998  | 0.122005 | 153484545 | 153498503 | 153498846 | 15349997 |
| 66 | NA12872 | [2515685 chr2 | 2 | 153622711 | 153625256 | 2546   | 3   | 0.887202  | 0.089608 | 153621175 | 153624247 | 153625088 | 15362542 |
| 67 | NA12872 | [2515685 chr2 | 2 | 208176479 | 208184457 | 7979   | 7   | 0.923111  | 0.058929 | 208176093 | 208176865 | 208183930 | 20818498 |
| 68 | NA12872 | [2515685 chr2 | 2 | 213009234 | 213016481 | 7248   | 8   | -0.966609 | 0.051019 | 213008915 | 213009554 | 213016164 | 21301679 |
| 69 | NA12872 | [2515685 chr2 | 2 | 232512469 | 232537143 | 24675  | 6   | 0.375251  | 0.03733  | 232511142 | 232513796 | 232534243 | 23254004 |
| 70 | NA12872 | [2515685 chr2 | 2 | 242664580 | 242668683 | 4104   | 10  | 1.579008  | 0.045419 | 242664284 | 242664877 | 242668532 | 24266883 |
| 71 | NA12872 | [2515685 chr3 | 3 | 149944    | 152369    | 2426   | 4   | -0.470611 | 0.07648  | 148712    | 151176    | 151848    | 15289    |
| 72 | NA12872 | [2515685 chr3 | 3 | 204650    | 209394    | 4745   | 4   | 0.885653  | 0.073079 | 202918    | 206383    | 209009    | 209775   |
| 73 | NA12872 | [2515685 chr3 | 3 | 587432    | 638425    | 50994  | 44  | -0.560214 | 0.022105 | 586921    | 587943    | 638149    | 638701   |
| 74 | NA12872 | [2515685 chr3 | 3 | 1757211   | 1765701   | 8491   | 2   | 0.825324  | 0.114655 | 1756096   | 1758327   | 1762058   | 179730   |
| 75 | NA12872 | [2515685 chr3 | 3 | 6622788   | 6629620   | 6833   | 6   | -0.779681 | 0.057796 | 6492869   | 6626431   | 6629261   | 662998   |
| 76 | NA12872 | [2515685 chr3 | 3 | 47819453  | 47820469  | 1017   | 3   | 0.412027  | 0.078877 | 47819200  | 47819707  | 47820356  | 4782058  |

|             |               |   |           |           |        |     |           |          |           |           |           |          |
|-------------|---------------|---|-----------|-----------|--------|-----|-----------|----------|-----------|-----------|-----------|----------|
| 77 NA12872  | [2515685 chr3 | 3 | 68821474  | 68830847  | 9374   | 17  | -2.002044 | 0.053618 | 68818894  | 68824055  | 68830417  | 68831277 |
| 78 NA12872  | [2515685 chr3 | 3 | 75532197  | 75540306  | 8110   | 4   | -0.418718 | 0.065499 | 75531364  | 75533030  | 75536663  | 75544121 |
| 79 NA12872  | [2515685 chr3 | 3 | 75841831  | 75879748  | 37918  | 21  | -0.284663 | 0.02848  | 75836910  | 75845474  | 75876105  | 75891771 |
| 80 NA12872  | [2515685 chr3 | 3 | 105760262 | 105762355 | 2094   | 2   | -0.801872 | 0.118848 | 105759634 | 105760890 | 105761424 | 10576328 |
| 81 NA12872  | [2515685 chr3 | 3 | 127155218 | 127158873 | 3656   | 6   | -0.406244 | 0.05768  | 127155047 | 127155390 | 127158237 | 12715950 |
| 82 NA12872  | [2515685 chr3 | 3 | 133191392 | 133196576 | 5185   | 5   | -2.771507 | 0.102212 | 133190820 | 133191965 | 133195824 | 13319732 |
| 83 NA12872  | [2515685 chr3 | 3 | 156042614 | 156043843 | 1230   | 2   | -0.600457 | 0.103962 | 156042074 | 156043154 | 156043483 | 15604420 |
| 84 NA12872  | [2515685 chr3 | 3 | 163994592 | 164008330 | 13739  | 18  | 1.952218  | 0.025965 | 163993392 | 163995793 | 164008010 | 16400865 |
| 85 NA12872  | [2515685 chr3 | 3 | 164031298 | 164106273 | 74976  | 71  | 1.952218  | 0.025965 | 164027655 | 164036948 | 164106029 | 16410651 |
| 86 NA12872  | [2515685 chr3 | 3 | 191219813 | 191223326 | 3514   | 4   | 0.743894  | 0.075252 | 191219291 | 191220336 | 191220918 | 19122373 |
| 87 NA12872  | [2515685 chr3 | 3 | 192547312 | 192554331 | 7020   | 10  | 0.910003  | 0.051565 | 192546950 | 192547674 | 192554127 | 19255453 |
| 88 NA12872  | [2515685 chr3 | 3 | 196681634 | 196713768 | 32135  | 35  | -0.326766 | 0.018553 | 196680972 | 196682296 | 196711768 | 19671576 |
| 89 NA12872  | [2515685 chr3 | 3 | 196909425 | 196933103 | 23679  | 21  | 0.273442  | 0.031639 | 196909131 | 196909720 | 196932440 | 19693376 |
| 90 NA12872  | [2515685 chr3 | 3 | 196994475 | 197002965 | 8491   | 10  | 0.98379   | 0.047107 | 196994054 | 196994896 | 197002044 | 19700388 |
| 91 NA12872  | [2515685 chr3 | 3 | 198674426 | 198675470 | 1045   | 6   | -0.292186 | 0.048194 | 198674161 | 198674692 | 198674903 | 19867603 |
| 92 NA12872  | [2515685 chr3 | 3 | 199313925 | 199321063 | 7139   | 15  | 1.606831  | 0.03121  | 199313515 | 199314336 | 199320844 | 19932128 |
| 93 NA12872  | [2515685 chr4 | 4 | 8739800   | 8756949   | 17150  | 26  | 0.416844  | 0.007441 | 8739551   | 8740049   | 8756813   | 8757081  |
| 94 NA12872  | [2515685 chr4 | 4 | 8853839   | 9046719   | 192881 | 87  | 0.416844  | 0.007441 | 8850774   | 9001243   | 9046129   | 9047301  |
| 95 NA12872  | [2515685 chr4 | 4 | 9887220   | 9911397   | 24178  | 31  | 2.146393  | 0.042359 | 9886886   | 9887555   | 9910388   | 9912407  |
| 96 NA12872  | [2515685 chr4 | 4 | 34602797  | 34650994  | 48198  | 45  | 0.679837  | 0.024222 | 34601994  | 34603600  | 34649535  | 3465245  |
| 97 NA12872  | [2515685 chr4 | 4 | 64522941  | 64543857  | 20917  | 20  | -0.751999 | 0.038248 | 64522682  | 64523201  | 64542552  | 6454516  |
| 98 NA12872  | [2515685 chr4 | 4 | 66475262  | 66478728  | 3467   | 4   | -0.385879 | 0.074505 | 66474966  | 66475558  | 66478106  | 66479351 |
| 99 NA12872  | [2515685 chr4 | 4 | 69202095  | 69321049  | 118955 | 75  | 1.327685  | 0.022163 | 69201955  | 69202236  | 69320887  | 6932121  |
| 100 NA12872 | [2515685 chr4 | 4 | 69321049  | 69368477  | 47429  | 42  | 0.49759   | 0.018477 | 69320887  | 69321212  | 69365412  | 6938219  |
| 101 NA12872 | [2515685 chr4 | 4 | 69672033  | 69720487  | 48455  | 53  | 0.490645  | 0.017268 | 69671975  | 69672092  | 69717422  | 6973421  |
| 102 NA12872 | [2515685 chr4 | 4 | 70329576  | 70418701  | 89126  | 87  | 0.398374  | 0.016781 | 70329375  | 70329777  | 70418467  | 70418931 |
| 103 NA12872 | [2515685 chr4 | 4 | 115534211 | 115541546 | 7336   | 9   | 0.8351    | 0.056401 | 115530015 | 115537276 | 115539984 | 11554310 |
| 104 NA12872 | [2515685 chr4 | 4 | 119080965 | 119082483 | 1519   | 2   | -0.944267 | 0.127877 | 119080746 | 119081184 | 119081813 | 11908315 |
| 105 NA12872 | [2515685 chr4 | 4 | 119480821 | 119487782 | 6962   | 5   | -0.92143  | 0.069241 | 119473487 | 119483886 | 119487418 | 11948814 |
| 106 NA12872 | [2515685 chr4 | 4 | 133536193 | 133540723 | 4531   | 3   | -0.751768 | 0.100005 | 133531398 | 133539258 | 133540462 | 13354098 |
| 107 NA12872 | [2515685 chr4 | 4 | 138449561 | 138458454 | 8894   | 8   | -0.976404 | 0.058942 | 138448993 | 138450130 | 138458291 | 13845861 |
| 108 NA12872 | [2515685 chr4 | 4 | 138537751 | 138549906 | 12156  | 14  | 0.787701  | 0.046032 | 138537443 | 138538059 | 138547414 | 13855239 |
| 109 NA12872 | [2515685 chr4 | 4 | 145087506 | 145089809 | 2304   | 5   | -0.377868 | 0.063587 | 145087283 | 145087729 | 145089317 | 14509030 |
| 110 NA12872 | [2515685 chr4 | 4 | 145238696 | 145245588 | 6893   | 5   | -0.551074 | 0.07126  | 145236919 | 145240473 | 145245192 | 14524598 |
| 111 NA12872 | [2515685 chr4 | 4 | 157318707 | 157331504 | 12798  | 14  | -0.798874 | 0.04547  | 157316408 | 157321006 | 157331168 | 15733184 |
| 112 NA12872 | [2515685 chr4 | 4 | 169183401 | 169368370 | 184970 | 163 | 0.723382  | 0.012456 | 169182712 | 169184090 | 169366713 | 16937002 |
| 113 NA12872 | [2515685 chr4 | 4 | 173363594 | 173367718 | 4125   | 6   | -0.855404 | 0.065315 | 173362583 | 173364606 | 173367283 | 17336815 |
| 114 NA12872 | [2515685 chr4 | 4 | 173799832 | 173807320 | 7489   | 6   | -2.680929 | 0.126327 | 173799464 | 173800201 | 173804255 | 17381134 |
| 115 NA12872 | [2515685 chr4 | 4 | 185533276 | 185544849 | 11574  | 12  | 0.844226  | 0.046682 | 185532696 | 185533857 | 185543276 | 18554642 |
| 116 NA12872 | [2515685 chr4 | 4 | 187728494 | 187732907 | 4414   | 15  | 1.940291  | 0.050377 | 187728193 | 187728795 | 187732541 | 18773327 |
| 117 NA12872 | [2515685 chr4 | 4 | 189799455 | 189807562 | 8108   | 11  | -0.410284 | 0.044347 | 189799180 | 189799730 | 189807064 | 18980806 |
| 118 NA12872 | [2515685 chr4 | 4 | 190528602 | 190533163 | 4562   | 21  | -2.875845 | 0.047599 | 190528058 | 190529146 | 190531664 | 19053466 |
| 119 NA12872 | [2515685 chr5 | 5 | 121365    | 172074    | 50710  | 56  | 0.489967  | 0.019831 | 112264    | 124556    | 171474    | 172675   |
| 120 NA12872 | [2515685 chr5 | 5 | 520743    | 521684    | 942    | 5   | 0.389156  | 0.06965  | 520428    | 521059    | 521427    | 521942   |
| 121 NA12872 | [2515685 chr5 | 5 | 682536    | 686746    | 4211   | 16  | -0.250055 | 0.035679 | 682483    | 682590    | 686331    | 687162   |
| 122 NA12872 | [2515685 chr5 | 5 | 811834    | 820048    | 8215   | 10  | 0.533623  | 0.049332 | 811517    | 812152    | 819824    | 820272   |
| 123 NA12872 | [2515685 chr5 | 5 | 1223248   | 1223930   | 683    | 5   | 1.117044  | 0.063696 | 1223057   | 1223439   | 1223854   | 1224007  |
| 124 NA12872 | [2515685 chr5 | 5 | 1231558   | 1233247   | 1690   | 2   | -0.750193 | 0.10542  | 1231167   | 1231949   | 1232879   | 1233611  |
| 125 NA12872 | [2515685 chr5 | 5 | 12863961  | 12873512  | 9552   | 14  | -2.556108 | 0.072978 | 12863778  | 12864144  | 12873198  | 12873827 |
| 126 NA12872 | [2515685 chr5 | 5 | 13027987  | 13034469  | 6483   | 8   | -0.294294 | 0.054676 | 13027662  | 13028312  | 13034170  | 13034761 |
| 127 NA12872 | [2515685 chr5 | 5 | 19410747  | 19412172  | 1426   | 3   | 0.721415  | 0.091698 | 19410189  | 19411305  | 19411980  | 19412361 |
| 128 NA12872 | [2515685 chr5 | 5 | 21483394  | 21488147  | 4754   | 4   | -0.73748  | 0.07582  | 21480817  | 21485972  | 21487855  | 21488431 |
| 129 NA12872 | [2515685 chr5 | 5 | 26831997  | 26837938  | 5942   | 6   | 0.677612  | 0.067217 | 26829858  | 26834136  | 26837469  | 26838401 |
| 130 NA12872 | [2515685 chr5 | 5 | 69358940  | 69404835  | 45896  | 45  | 0.30498   | 0.017014 | 69358540  | 69359340  | 69404157  | 6940551  |
| 131 NA12872 | [2515685 chr5 | 5 | 69404835  | 69411352  | 6518   | 6   | 0.754859  | 0.048503 | 69404157  | 69405513  | 69410702  | 69412001 |



|             |               |   |           |           |        |     |                    |           |           |           |          |
|-------------|---------------|---|-----------|-----------|--------|-----|--------------------|-----------|-----------|-----------|----------|
| 132 NA12872 | [2515685 chr5 | 5 | 70233016  | 70299149  | 66134  | 56  | 0.34463 0.015218   | 70232663  | 70233369  | 70298322  | 70299971 |
| 133 NA12872 | [2515685 chr5 | 5 | 81459214  | 81466054  | 6841   | 2   | -1.358352 0.122624 | 81455614  | 81462405  | 81462863  | 81470281 |
| 134 NA12872 | [2515685 chr5 | 5 | 93928460  | 93931722  | 3263   | 3   | -0.560414 0.089243 | 93927706  | 93929215  | 93931460  | 93931984 |
| 135 NA12872 | [2515685 chr5 | 5 | 99409393  | 99419037  | 9645   | 13  | -0.626708 0.042508 | 99408997  | 99409789  | 99418328  | 99419741 |
| 136 NA12872 | [2515685 chr5 | 5 | 122649189 | 122651412 | 2224   | 3   | 0.495685 0.088695  | 122648933 | 122649446 | 122650032 | 12265279 |
| 137 NA12872 | [2515685 chr5 | 5 | 137835848 | 137844134 | 8287   | 7   | 0.554555 0.060644  | 137835611 | 137836085 | 137843310 | 13784495 |
| 138 NA12872 | [2515685 chr5 | 5 | 140196516 | 140200983 | 4468   | 7   | -0.960804 0.061933 | 140195973 | 140197059 | 140200638 | 14020132 |
| 139 NA12872 | [2515685 chr5 | 5 | 140203081 | 140218928 | 15848  | 20  | 1.773459 0.049717  | 140202344 | 140203819 | 140218508 | 14021934 |
| 140 NA12872 | [2515685 chr5 | 5 | 140534849 | 140540106 | 5258   | 5   | 0.7599 0.069568    | 140534700 | 140534999 | 140539007 | 14054120 |
| 141 NA12872 | [2515685 chr5 | 5 | 151495251 | 151499062 | 3812   | 6   | -0.664086 0.069501 | 151494886 | 151495617 | 151498563 | 15149956 |
| 142 NA12872 | [2515685 chr5 | 5 | 165157996 | 165161604 | 3609   | 2   | -0.772176 0.12349  | 165155280 | 165160712 | 165160802 | 16516240 |
| 143 NA12872 | [2515685 chr5 | 5 | 180108385 | 180119114 | 10730  | 8   | 0.518495 0.054975  | 180108099 | 180108671 | 180115923 | 18013530 |
| 144 NA12872 | [2515685 chr6 | 6 | 235965    | 326596    | 90632  | 104 | 0.34221 0.013804   | 235368    | 235653    | 326200    | 326993   |
| 145 NA12872 | [2515685 chr6 | 6 | 19149239  | 19153294  | 4056   | 9   | -2.648403 0.078539 | 19148813  | 19149665  | 19152712  | 19153871 |
| 146 NA12872 | [2515685 chr6 | 6 | 26860417  | 26861511  | 1095   | 2   | -0.683183 0.096875 | 26860088  | 26860746  | 26861212  | 26861811 |
| 147 NA12872 | [2515685 chr6 | 6 | 29958572  | 30011802  | 53231  | 50  | 0.524157 0.021619  | 29957670  | 29959474  | 30011083  | 30012521 |
| 148 NA12872 | [2515685 chr6 | 6 | 31365231  | 31367326  | 2096   | 2   | 0.647884 0.095363  | 31364305  | 31366158  | 31366773  | 31367871 |
| 149 NA12872 | [2515685 chr6 | 6 | 32564602  | 32586862  | 22261  | 4   | -0.769636 0.137612 | 32564316  | 32564888  | 32586127  | 32587591 |
| 150 NA12872 | [2515685 chr6 | 6 | 32589957  | 32591649  | 1693   | 3   | -0.768609 0.090458 | 32589338  | 32590576  | 32591403  | 32591891 |
| 151 NA12872 | [2515685 chr6 | 6 | 32605125  | 32617042  | 11918  | 9   | -0.301897 0.045953 | 32604923  | 32605328  | 32613543  | 32626571 |
| 152 NA12872 | [2515685 chr6 | 6 | 32653862  | 32655482  | 1621   | 3   | 0.949148 0.12246   | 32653679  | 32654046  | 32654980  | 32655984 |
| 153 NA12872 | [2515685 chr6 | 6 | 32678696  | 32680751  | 2056   | 3   | 0.625703 0.091369  | 32678507  | 32678885  | 32680547  | 32680951 |
| 154 NA12872 | [2515685 chr6 | 6 | 32702716  | 32705737  | 3022   | 3   | -0.433492 0.069858 | 32702285  | 32703148  | 32704019  | 32707451 |
| 155 NA12872 | [2515685 chr6 | 6 | 32737263  | 32742302  | 5040   | 8   | 0.372325 0.052566  | 32737093  | 32737434  | 32742067  | 32742531 |
| 156 NA12872 | [2515685 chr6 | 6 | 41807923  | 41811844  | 3922   | 5   | 0.383436 0.066234  | 41807597  | 41808250  | 41811521  | 41812161 |
| 157 NA12872 | [2515685 chr6 | 6 | 58247502  | 58250099  | 2598   | 4   | -0.370802 0.072687 | 58247311  | 58247693  | 58249771  | 58250421 |
| 158 NA12872 | [2515685 chr6 | 6 | 62338502  | 62343650  | 5149   | 2   | -0.740672 0.100332 | 62334618  | 62342001  | 62342340  | 62344961 |
| 159 NA12872 | [2515685 chr6 | 6 | 63656044  | 63658372  | 2329   | 3   | -0.894155 0.085232 | 63655444  | 63656644  | 63658061  | 63658668 |
| 160 NA12872 | [2515685 chr6 | 6 | 77495034  | 77513510  | 18477  | 12  | 0.731692 0.047353  | 77493568  | 77496500  | 77510011  | 77517691 |
| 161 NA12872 | [2515685 chr6 | 6 | 78325240  | 78328478  | 3239   | 4   | -0.338615 0.065724 | 78324990  | 78325490  | 78328067  | 78328881 |
| 162 NA12872 | [2515685 chr6 | 6 | 79023318  | 79093263  | 69946  | 70  | 0.751213 0.018324  | 79022028  | 79024609  | 79091909  | 79094611 |
| 163 NA12872 | [2515685 chr6 | 6 | 103844685 | 103871201 | 26517  | 17  | 2.288949 0.065022  | 103844347 | 103845023 | 103868241 | 10387411 |
| 164 NA12872 | [2515685 chr6 | 6 | 132067707 | 132076818 | 9112   | 7   | -0.268439 0.045511 | 132048222 | 132071206 | 132076464 | 13207716 |
| 165 NA12872 | [2515685 chr6 | 6 | 160686231 | 160697100 | 10870  | 10  | 0.265867 0.046642  | 160685841 | 160686622 | 160696605 | 16069759 |
| 166 NA12872 | [2515685 chr6 | 6 | 160997684 | 161051768 | 54085  | 73  | 0.376567 0.011401  | 160997465 | 160997903 | 161051454 | 16105208 |
| 167 NA12872 | [2515685 chr6 | 6 | 162887717 | 162896314 | 8598   | 10  | -0.346212 0.045818 | 162887122 | 162888313 | 162895355 | 16289727 |
| 168 NA12872 | [2515685 chr6 | 6 | 170720829 | 170723478 | 2650   | 11  | -0.341938 0.047923 | 170720441 | 170721218 | 170723334 | 17072362 |
| 169 NA12872 | [2515685 chr7 | 7 | 929017    | 930663    | 1647   | 5   | 0.369921 0.066755  | 928626    | 929408    | 930382    | 930945   |
| 170 NA12872 | [2515685 chr7 | 7 | 1084125   | 1086660   | 2536   | 15  | 0.541825 0.039085  | 1083752   | 1084499   | 1085871   | 1087445  |
| 171 NA12872 | [2515685 chr7 | 7 | 3384111   | 3392457   | 8347   | 8   | 0.789245 0.056401  | 3383451   | 3384772   | 3390107   | 3395611  |
| 172 NA12872 | [2515685 chr7 | 7 | 5654917   | 5661199   | 6283   | 8   | -0.415109 0.055212 | 5654537   | 5655298   | 5660642   | 5661751  |
| 173 NA12872 | [2515685 chr7 | 7 | 37639640  | 37657849  | 18210  | 6   | -0.36487 0.054414  | 37638580  | 37640700  | 37655499  | 37719601 |
| 174 NA12872 | [2515685 chr7 | 7 | 40167113  | 40259124  | 92012  | 91  | 0.272119 0.00764   | 40166468  | 40167759  | 40258770  | 40259471 |
| 175 NA12872 | [2515685 chr7 | 7 | 43774540  | 43943924  | 169385 | 111 | 0.272119 0.00764   | 43774344  | 43774737  | 43941574  | 44020061 |
| 176 NA12872 | [2515685 chr7 | 7 | 62125135  | 62127573  | 2439   | 6   | -0.357906 0.060991 | 62125074  | 62125197  | 62127435  | 62127711 |
| 177 NA12872 | [2515685 chr7 | 7 | 62423752  | 62430522  | 6771   | 18  | -0.289906 0.034907 | 62423322  | 62424183  | 62429779  | 62431261 |
| 178 NA12872 | [2515685 chr7 | 7 | 64029672  | 64045487  | 15816  | 45  | -0.288114 0.020697 | 64029291  | 64030053  | 64045069  | 64045901 |
| 179 NA12872 | [2515685 chr7 | 7 | 64464087  | 64479903  | 15817  | 43  | -0.276889 0.021479 | 64463669  | 64464506  | 64479522  | 64480281 |
| 180 NA12872 | [2515685 chr7 | 7 | 64546022  | 64556662  | 10641  | 29  | -0.312727 0.026435 | 64545946  | 64546099  | 64556244  | 64557081 |
| 181 NA12872 | [2515685 chr7 | 7 | 66185764  | 66201259  | 15496  | 33  | 0.255304 0.018319  | 66185376  | 66186152  | 66200200  | 66202311 |
| 182 NA12872 | [2515685 chr7 | 7 | 69866390  | 69869623  | 3234   | 4   | 0.446135 0.076056  | 69865412  | 69867368  | 69869269  | 69869971 |
| 183 NA12872 | [2515685 chr7 | 7 | 69869623  | 69871056  | 1434   | 2   | 2.865072 0.164001  | 69869269  | 69869978  | 69870420  | 69871691 |
| 184 NA12872 | [2515685 chr7 | 7 | 71775194  | 71786841  | 11648  | 27  | 0.256033 0.021262  | 71773381  | 71777008  | 71786776  | 71786901 |
| 185 NA12872 | [2515685 chr7 | 7 | 74767360  | 74781906  | 14547  | 34  | 0.25554 0.019801   | 74767168  | 74767552  | 74781415  | 74782391 |
| 186 NA12872 | [2515685 chr7 | 7 | 75802193  | 75814938  | 12746  | 29  | 0.258692 0.019678  | 75801169  | 75803217  | 75814512  | 75815361 |

|             |               |   |           |           |        |     |           |          |           |           |           |           |
|-------------|---------------|---|-----------|-----------|--------|-----|-----------|----------|-----------|-----------|-----------|-----------|
| 187 NA12872 | [2515685 chr7 | 7 | 76173835  | 76175647  | 1813   | 2   | 0.596283  | 0.105655 | 76173564  | 76174106  | 76174852  | 7617644;  |
| 188 NA12872 | [2515685 chr7 | 7 | 76321149  | 76341570  | 20422  | 38  | 0.266054  | 0.018401 | 76320229  | 76322070  | 76339220  | 7634614;  |
| 189 NA12872 | [2515685 chr7 | 7 | 89455601  | 89456632  | 1032   | 2   | 3.460279  | 0.199131 | 89455373  | 89455830  | 89456225  | 8945703;  |
| 190 NA12872 | [2515685 chr7 | 7 | 97032078  | 97047344  | 15267  | 17  | -0.625509 | 0.03987  | 97031625  | 97032531  | 97046973  | 9704771;  |
| 191 NA12872 | [2515685 chr7 | 7 | 101575496 | 101591961 | 16466  | 38  | 0.255968  | 0.017806 | 101575495 | 101575497 | 101591559 | 10159236; |
| 192 NA12872 | [2515685 chr7 | 7 | 101706885 | 101925433 | 218549 | 313 | 0.404661  | 0.006333 | 101690888 | 101709235 | 101924670 | 10192619; |
| 193 NA12872 | [2515685 chr7 | 7 | 109034784 | 109046722 | 11939  | 9   | 1.570239  | 0.074341 | 109024063 | 109037134 | 109046491 | 10904695; |
| 194 NA12872 | [2515685 chr7 | 7 | 110690380 | 110751991 | 61612  | 60  | -0.759588 | 0.020622 | 110690124 | 110690637 | 110751640 | 11075234; |
| 195 NA12872 | [2515685 chr7 | 7 | 115531434 | 115535130 | 3697   | 2   | -1.032482 | 0.119812 | 115523520 | 115533784 | 115534405 | 11553585; |
| 196 NA12872 | [2515685 chr7 | 7 | 125639507 | 125644775 | 5269   | 6   | -2.373981 | 0.116776 | 125639054 | 125639961 | 125644046 | 12564550; |
| 197 NA12872 | [2515685 chr7 | 7 | 126112724 | 126121632 | 8909   | 13  | -0.308681 | 0.040874 | 126112167 | 126113282 | 126121278 | 12612198; |
| 198 NA12872 | [2515685 chr7 | 7 | 141495319 | 141505136 | 9818   | 12  | -0.27997  | 0.039679 | 141494721 | 141495918 | 141504428 | 14150584; |
| 199 NA12872 | [2515685 chr7 | 7 | 141505136 | 141521690 | 16555  | 20  | -1.216468 | 0.044537 | 141504428 | 141505844 | 141521412 | 14152196; |
| 200 NA12872 | [2515685 chr7 | 7 | 141859547 | 141860812 | 1266   | 2   | -0.932564 | 0.112818 | 141859116 | 141859979 | 141860531 | 14186109; |
| 201 NA12872 | [2515685 chr7 | 7 | 141960848 | 141978673 | 17826  | 23  | -0.327412 | 0.030944 | 141960004 | 141961693 | 141978355 | 14197899; |
| 202 NA12872 | [2515685 chr7 | 7 | 143318520 | 143415599 | 97080  | 173 | -0.376114 | 0.007252 | 143318192 | 143318849 | 143415580 | 14341561; |
| 203 NA12872 | [2515685 chr7 | 7 | 143420642 | 143500242 | 79601  | 161 | -0.376114 | 0.007252 | 143420120 | 143421165 | 143499999 | 14350048; |
| 204 NA12872 | [2515685 chr7 | 7 | 143503774 | 143511719 | 7946   | 16  | -0.376114 | 0.007252 | 143503497 | 143504051 | 143511270 | 14351216; |
| 205 NA12872 | [2515685 chr7 | 7 | 156976112 | 156978464 | 2353   | 2   | 0.746973  | 0.100919 | 156975812 | 156976413 | 156977896 | 15697903; |
| 206 NA12872 | [2515685 chr7 | 7 | 158617060 | 158624378 | 7319   | 6   | 0.755291  | 0.06778  | 158616763 | 158617357 | 158622028 | 15862672; |
| 207 NA12872 | [2515685 chr8 | 8 | 13248     | 32375     | 19128  | 30  | -0.269466 | 0.026889 | 12957     | 13540     | 32228     | 32523     |
| 208 NA12872 | [2515685 chr8 | 8 | 314016    | 315938    | 1923   | 3   | 0.900871  | 0.086313 | 313588    | 314445    | 315734    | 316142    |
| 209 NA12872 | [2515685 chr8 | 8 | 1328256   | 1343509   | 15254  | 45  | -0.965594 | 0.021217 | 1327688   | 1328824   | 1342795   | 1344224   |
| 210 NA12872 | [2515685 chr8 | 8 | 2242539   | 2253791   | 11253  | 8   | -2.195672 | 0.085188 | 2242059   | 2243019   | 2251039   | 2257526   |
| 211 NA12872 | [2515685 chr8 | 8 | 3986302   | 3987764   | 1463   | 2   | -0.67909  | 0.127923 | 3986021   | 3986584   | 3987365   | 3988163   |
| 212 NA12872 | [2515685 chr8 | 8 | 5582875   | 5594011   | 11137  | 9   | 0.834269  | 0.047874 | 5582615   | 5583135   | 5592820   | 5595203   |
| 213 NA12872 | [2515685 chr8 | 8 | 5817892   | 5820042   | 2151   | 2   | -0.853658 | 0.131587 | 5817072   | 5818713   | 5819661   | 5820423   |
| 214 NA12872 | [2515685 chr8 | 8 | 6813967   | 6815529   | 1563   | 2   | -0.907287 | 0.094962 | 6813560   | 6814375   | 6815199   | 6815860   |
| 215 NA12872 | [2515685 chr8 | 8 | 6817073   | 6866734   | 49662  | 88  | 0.281781  | 0.012168 | 6816809   | 6817338   | 6866719   | 6866750   |
| 216 NA12872 | [2515685 chr8 | 8 | 7176337   | 7187950   | 11614  | 33  | 0.492168  | 0.025817 | 7176045   | 7176630   | 7187698   | 7188202   |
| 217 NA12872 | [2515685 chr8 | 8 | 7361471   | 7361978   | 508    | 2   | -0.818045 | 0.116223 | 7361306   | 7361636   | 7361889   | 7362067   |
| 218 NA12872 | [2515685 chr8 | 8 | 7862281   | 7873897   | 11617  | 34  | 0.494319  | 0.024606 | 7862030   | 7862533   | 7873605   | 7874190   |
| 219 NA12872 | [2515685 chr8 | 8 | 12023134  | 12035286  | 12153  | 33  | 0.491266  | 0.026032 | 12022997  | 12023272  | 12034973  | 1203559;  |
| 220 NA12872 | [2515685 chr8 | 8 | 12276602  | 12284041  | 7440   | 14  | 0.513877  | 0.036314 | 12276206  | 12276998  | 12283622  | 1228446;  |
| 221 NA12872 | [2515685 chr8 | 8 | 15160631  | 15163044  | 2414   | 3   | -0.522726 | 0.084974 | 15160391  | 15160872  | 15162745  | 1516334;  |
| 222 NA12872 | [2515685 chr8 | 8 | 49081430  | 49084499  | 3070   | 2   | 0.946141  | 0.111208 | 49079497  | 49083364  | 49084089  | 4908491;  |
| 223 NA12872 | [2515685 chr8 | 8 | 58278355  | 58289214  | 10860  | 9   | 1.233747  | 0.044896 | 58277116  | 58279595  | 58288084  | 5829034;  |
| 224 NA12872 | [2515685 chr8 | 8 | 58290538  | 58296106  | 5569   | 7   | 0.551687  | 0.058964 | 58290345  | 58290731  | 58295669  | 5829654;  |
| 225 NA12872 | [2515685 chr8 | 8 | 115703942 | 115715315 | 11374  | 11  | -0.789055 | 0.048032 | 115703065 | 115704820 | 115712563 | 11571874; |
| 226 NA12872 | [2515685 chr8 | 8 | 120222662 | 120229952 | 7291   | 6   | 0.749642  | 0.061693 | 120218251 | 120225414 | 120229434 | 12023047; |
| 227 NA12872 | [2515685 chr9 | 9 | 310045    | 312573    | 2529   | 61  | -0.812786 | 0.016492 | 309952    | 310139    | 312407    | 312740    |
| 228 NA12872 | [2515685 chr9 | 9 | 33591509  | 33599993  | 8485   | 4   | -0.327245 | 0.06227  | 33588656  | 33593870  | 33598904  | 3360108;  |
| 229 NA12872 | [2515685 chr9 | 9 | 33646675  | 33648138  | 1464   | 2   | -0.5901   | 0.112724 | 33646355  | 33646996  | 33647857  | 3364842;  |
| 230 NA12872 | [2515685 chr9 | 9 | 38488623  | 38675071  | 186449 | 181 | -0.425676 | 0.010923 | 38487759  | 38489488  | 38674425  | 3867571;  |
| 231 NA12872 | [2515685 chr9 | 9 | 38856018  | 38864486  | 8469   | 16  | -0.27264  | 0.034229 | 38849975  | 38858379  | 38864433  | 3886453;  |
| 232 NA12872 | [2515685 chr9 | 9 | 40254839  | 40273448  | 18610  | 40  | -0.367222 | 0.023237 | 40254572  | 40255106  | 40271087  | 4027696;  |
| 233 NA12872 | [2515685 chr9 | 9 | 40730670  | 40734310  | 3641   | 7   | 0.284639  | 0.047764 | 40730592  | 40730749  | 40733280  | 4073534;  |
| 234 NA12872 | [2515685 chr9 | 9 | 41234952  | 41243366  | 8415   | 13  | -0.2986   | 0.038778 | 41234900  | 41235005  | 41241005  | 4124946;  |
| 235 NA12872 | [2515685 chr9 | 9 | 42026005  | 42029645  | 3641   | 7   | 0.284637  | 0.047763 | 42024974  | 42027036  | 42029567  | 4202972;  |
| 236 NA12872 | [2515685 chr9 | 9 | 42708074  | 42711714  | 3641   | 9   | 0.25203   | 0.039514 | 42707045  | 42709104  | 42711636  | 4271179;  |
| 237 NA12872 | [2515685 chr9 | 9 | 42754727  | 42756705  | 1979   | 3   | -0.385556 | 0.061085 | 42754385  | 42755070  | 42755767  | 4275764;  |
| 238 NA12872 | [2515685 chr9 | 9 | 42828750  | 42832390  | 3641   | 9   | 0.252031  | 0.039514 | 42827721  | 42829780  | 42832312  | 4283246;  |
| 239 NA12872 | [2515685 chr9 | 9 | 42875403  | 42877381  | 1979   | 3   | -0.385556 | 0.061085 | 42875061  | 42875746  | 42876443  | 4287832;  |
| 240 NA12872 | [2515685 chr9 | 9 | 43182773  | 43195422  | 12650  | 23  | -0.39366  | 0.031168 | 43179223  | 43185134  | 43195330  | 4319551;  |
| 241 NA12872 | [2515685 chr9 | 9 | 43441558  | 43444062  | 2505   | 7   | -0.277259 | 0.047138 | 43441276  | 43441841  | 43443734  | 4344439;  |

|             |                |    |           |           |        |      |           |          |           |           |           |           |
|-------------|----------------|----|-----------|-----------|--------|------|-----------|----------|-----------|-----------|-----------|-----------|
| 242 NA12872 | [2515685 chr9  | 9  | 43505998  | 43508499  | 2502   | 8    | -0.273372 | 0.044352 | 43505670  | 43506327  | 43508216  | 4350878;  |
| 243 NA12872 | [2515685 chr9  | 9  | 43941080  | 43943985  | 2906   | 8    | 0.2688    | 0.048438 | 43940774  | 43941386  | 43943754  | 43944211  |
| 244 NA12872 | [2515685 chr9  | 9  | 44678564  | 44682053  | 3490   | 7    | 0.272975  | 0.052795 | 44678361  | 44678768  | 44681477  | 44682621  |
| 245 NA12872 | [2515685 chr9  | 9  | 44927718  | 44931216  | 3499   | 7    | 0.307415  | 0.055146 | 44927142  | 44928294  | 44931007  | 44931421  |
| 246 NA12872 | [2515685 chr9  | 9  | 66047392  | 66055801  | 8410   | 14   | -0.291904 | 0.039072 | 66047340  | 66047445  | 66053440  | 6606190;  |
| 247 NA12872 | [2515685 chr9  | 9  | 69247738  | 69255030  | 7293   | 3    | 0.381201  | 0.07094  | 69247278  | 69248198  | 69254771  | 69255291  |
| 248 NA12872 | [2515685 chr9  | 9  | 83692227  | 83699600  | 7374   | 7    | 0.28708   | 0.056339 | 83688141  | 83694588  | 83699277  | 8369992;  |
| 249 NA12872 | [2515685 chr9  | 9  | 83699600  | 83822937  | 123338 | 124  | 0.623404  | 0.013598 | 83699277  | 83699923  | 83822562  | 8382331;  |
| 250 NA12872 | [2515685 chr9  | 9  | 101788812 | 101790936 | 2125   | 2    | -0.886878 | 0.124703 | 101788588 | 101789037 | 101789706 | 10179216; |
| 251 NA12872 | [2515685 chr9  | 9  | 135438420 | 135444067 | 5648   | 2    | 2.935714  | 0.14758  | 135383632 | 135440781 | 135443016 | 13544511; |
| 252 NA12872 | [2515685 chr10 | 10 | 170571    | 172369    | 1799   | 2    | 1.195415  | 0.098917 | 170341    | 170801    | 171237    | 173501    |
| 253 NA12872 | [2515685 chr10 | 10 | 3099589   | 3101985   | 2397   | 2    | 0.58955   | 0.110911 | 3098962   | 3100217   | 3101441   | 310252;   |
| 254 NA12872 | [2515685 chr10 | 10 | 6693908   | 6703893   | 9986   | 8    | 0.758356  | 0.05532  | 6692231   | 6695585   | 6703779   | 6704008   |
| 255 NA12872 | [2515685 chr10 | 10 | 19788068  | 19790461  | 2394   | 3    | -0.432565 | 0.072352 | 19787726  | 19788411  | 19789952  | 19790971  |
| 256 NA12872 | [2515685 chr10 | 10 | 37491079  | 37529766  | 38688  | 59   | -0.303328 | 0.014716 | 37490689  | 37491470  | 37529500  | 3753003;  |
| 257 NA12872 | [2515685 chr10 | 10 | 45949018  | 45949554  | 537    | 2    | -0.771755 | 0.105695 | 45948746  | 45949291  | 45949345  | 4594976;  |
| 258 NA12872 | [2515685 chr10 | 10 | 46110964  | 46132737  | 21774  | 38   | -0.337413 | 0.017459 | 46110327  | 46111602  | 46132697  | 4613277;  |
| 259 NA12872 | [2515685 chr10 | 10 | 46167732  | 46171356  | 3625   | 14   | -0.356418 | 0.030917 | 46167382  | 46168082  | 46171200  | 4617151;  |
| 260 NA12872 | [2515685 chr10 | 10 | 46185144  | 46207292  | 22149  | 54   | -0.293155 | 0.015767 | 46184361  | 46185928  | 46204548  | 4621047;  |
| 261 NA12872 | [2515685 chr10 | 10 | 46216214  | 46220287  | 4074   | 16   | -0.322794 | 0.030006 | 46215871  | 46216557  | 46220114  | 4622046;  |
| 262 NA12872 | [2515685 chr10 | 10 | 46230274  | 47173707  | 943434 | 1341 | -0.301882 | 0.003311 | 46230243  | 46230306  | 47173507  | 4717390;  |
| 263 NA12872 | [2515685 chr10 | 10 | 47230731  | 47231502  | 772    | 2    | -0.565783 | 0.077321 | 47230574  | 47230889  | 47231201  | 4723180;  |
| 264 NA12872 | [2515685 chr10 | 10 | 47723238  | 47758287  | 35050  | 106  | -0.368212 | 0.011355 | 47575187  | 47725982  | 47758256  | 4775831;  |
| 265 NA12872 | [2515685 chr10 | 10 | 47768281  | 47772343  | 4063   | 17   | -0.320035 | 0.029531 | 47768108  | 47768455  | 47772001  | 47772681  |
| 266 NA12872 | [2515685 chr10 | 10 | 47781270  | 47803532  | 22263  | 62   | -0.297884 | 0.015436 | 47778091  | 47784014  | 47802824  | 4780424;  |
| 267 NA12872 | [2515685 chr10 | 10 | 47882376  | 47882889  | 514    | 2    | -0.485994 | 0.084512 | 47882318  | 47882435  | 47882645  | 4788313;  |
| 268 NA12872 | [2515685 chr10 | 10 | 47889059  | 47889830  | 772    | 2    | -0.565783 | 0.077321 | 47888902  | 47889217  | 47889529  | 4789013;  |
| 269 NA12872 | [2515685 chr10 | 10 | 48499011  | 48517469  | 18459  | 29   | -0.334826 | 0.019538 | 48498672  | 48499351  | 48517390  | 4851754;  |
| 270 NA12872 | [2515685 chr10 | 10 | 48557501  | 48561054  | 3554   | 15   | -0.345392 | 0.030328 | 48557151  | 48557851  | 48560968  | 4856114;  |
| 271 NA12872 | [2515685 chr10 | 10 | 48574881  | 48584011  | 9131   | 23   | -0.302061 | 0.023243 | 48574098  | 48575665  | 48583989  | 4858403;  |
| 272 NA12872 | [2515685 chr10 | 10 | 48586485  | 48597044  | 10560  | 25   | -0.3617   | 0.024291 | 48586154  | 48586817  | 48594300  | 4860023;  |
| 273 NA12872 | [2515685 chr10 | 10 | 48620019  | 48641100  | 21082  | 54   | -0.292246 | 0.014183 | 48619988  | 48620051  | 48640945  | 4864125;  |
| 274 NA12872 | [2515685 chr10 | 10 | 48642579  | 48865591  | 223013 | 118  | -0.371994 | 0.009654 | 48642297  | 48642861  | 48865564  | 4886561;  |
| 275 NA12872 | [2515685 chr10 | 10 | 48924243  | 48927636  | 3394   | 13   | -0.350649 | 0.033232 | 48923939  | 48924548  | 48927550  | 4892772;  |
| 276 NA12872 | [2515685 chr10 | 10 | 51116621  | 51129602  | 12982  | 16   | -0.361236 | 0.028758 | 51067634  | 51119365  | 51128757  | 5113044;  |
| 277 NA12872 | [2515685 chr10 | 10 | 55027163  | 55030874  | 3712   | 4    | 0.381503  | 0.074041 | 55027092  | 55027234  | 55030462  | 5503128;  |
| 278 NA12872 | [2515685 chr10 | 10 | 56117212  | 56139275  | 22064  | 20   | -1.020152 | 0.034336 | 56115764  | 56118661  | 56138931  | 5613961;  |
| 279 NA12872 | [2515685 chr10 | 10 | 77214180  | 77372070  | 157891 | 150  | 0.494839  | 0.011803 | 77213686  | 77214675  | 77371512  | 7737262;  |
| 280 NA12872 | [2515685 chr10 | 10 | 81662845  | 81669493  | 6649   | 10   | -0.261302 | 0.044187 | 81662614  | 81663077  | 81669128  | 8166985;  |
| 281 NA12872 | [2515685 chr10 | 10 | 88866216  | 88963891  | 97676  | 108  | -0.346664 | 0.01215  | 88865617  | 88866816  | 88963564  | 8896421;  |
| 282 NA12872 | [2515685 chr10 | 10 | 89144361  | 89149170  | 4810   | 10   | -0.300569 | 0.047809 | 89144303  | 89144873  | 89149461  | 8914946;  |
| 283 NA12872 | [2515685 chr10 | 10 | 89153792  | 89179870  | 26079  | 42   | -0.302637 | 0.019856 | 89150578  | 89156536  | 89179587  | 8918015;  |
| 284 NA12872 | [2515685 chr10 | 10 | 124336365 | 124341749 | 5385   | 6    | 0.554125  | 0.067123 | 124335581 | 124337149 | 124341238 | 12434226  |
| 285 NA12872 | [2515685 chr10 | 10 | 125162280 | 125164334 | 2055   | 2    | -0.957758 | 0.105072 | 125161337 | 125163224 | 125163911 | 12516475; |
| 286 NA12872 | [2515685 chr10 | 10 | 133602364 | 133603160 | 797    | 11   | -0.314519 | 0.039247 | 133602112 | 133602617 | 133602987 | 13360333  |
| 287 NA12872 | [2515685 chr10 | 10 | 134168766 | 134170259 | 1494   | 17   | -0.837113 | 0.041884 | 134168524 | 134169008 | 134170097 | 13417042; |
| 288 NA12872 | [2515685 chr10 | 10 | 134765630 | 134767237 | 1608   | 7    | 0.263819  | 0.047324 | 134765279 | 134765982 | 134766997 | 13476747  |
| 289 NA12872 | [2515685 chr10 | 10 | 135179346 | 135183528 | 4183   | 23   | 0.382432  | 0.017837 | 135178919 | 135179774 | 135183320 | 13518373  |
| 290 NA12872 | [2515685 chr10 | 10 | 135365507 | 135367159 | 1653   | 2    | 0.68533   | 0.119205 | 135364999 | 135366016 | 135366656 | 13536766  |
| 291 NA12872 | [2515685 chr11 | 11 | 2840307   | 2842410   | 2104   | 3    | 1.065456  | 0.102954 | 2839959   | 2840656   | 2841856   | 284296;   |
| 292 NA12872 | [2515685 chr11 | 11 | 3199166   | 3200613   | 1448   | 2    | -0.696473 | 0.106516 | 3198820   | 3199512   | 3200156   | 320107;   |
| 293 NA12872 | [2515685 chr11 | 11 | 3628748   | 3632795   | 4048   | 6    | 0.325621  | 0.059485 | 3625722   | 3631775   | 3632594   | 363299;   |
| 294 NA12872 | [2515685 chr11 | 11 | 5717038   | 5718491   | 1454   | 2    | 4.220224  | 0.22154  | 5716660   | 5717416   | 5718038   | 571894;   |
| 295 NA12872 | [2515685 chr11 | 11 | 5741269   | 5765993   | 24725  | 33   | 1.493105  | 0.03791  | 5741059   | 5741480   | 5765632   | 576635;   |
| 296 NA12872 | [2515685 chr11 | 11 | 10216340  | 10218077  | 1738   | 2    | -0.96787  | 0.123642 | 10215575  | 10217106  | 10217827  | 1021832;  |

|             |                |    |           |           |        |     |           |          |           |           |           |           |
|-------------|----------------|----|-----------|-----------|--------|-----|-----------|----------|-----------|-----------|-----------|-----------|
| 297 NA12872 | [2515685 chr11 | 11 | 10224780  | 10229788  | 5009   | 5   | 0.631865  | 0.086668 | 10219961  | 10227860  | 10227972  | 1023160!  |
| 298 NA12872 | [2515685 chr11 | 11 | 11831868  | 11833089  | 1222   | 2   | 0.878517  | 0.122299 | 11831412  | 11832324  | 11832853  | 1183332!  |
| 299 NA12872 | [2515685 chr11 | 11 | 18906905  | 18928671  | 21767  | 30  | 0.367494  | 0.026879 | 18906533  | 18907278  | 18928457  | 1892888!  |
| 300 NA12872 | [2515685 chr11 | 11 | 25614168  | 25624918  | 10751  | 10  | -0.80581  | 0.050468 | 25612852  | 25615485  | 25621838  | 2562806!  |
| 301 NA12872 | [2515685 chr11 | 11 | 28965605  | 28969186  | 3582   | 5   | 3.786174  | 0.14937  | 28965284  | 28965927  | 28968702  | 2896967!  |
| 302 NA12872 | [2515685 chr11 | 11 | 48284073  | 48284771  | 699    | 2   | 1.003521  | 0.107737 | 48283862  | 48284285  | 48284572  | 4828497!  |
| 303 NA12872 | [2515685 chr11 | 11 | 49665830  | 49715828  | 49999  | 36  | 0.421312  | 0.025206 | 49665251  | 49666410  | 49712748  | 4972198!  |
| 304 NA12872 | [2515685 chr11 | 11 | 50233802  | 50235333  | 1532   | 3   | -0.455726 | 0.063953 | 50233483  | 50234121  | 50234922  | 5023574!  |
| 305 NA12872 | [2515685 chr11 | 11 | 55124643  | 55212648  | 88006  | 98  | -0.774631 | 0.016418 | 55124460  | 55124827  | 55209568  | 5521575!  |
| 306 NA12872 | [2515685 chr11 | 11 | 73815147  | 73818580  | 3434   | 3   | -0.531836 | 0.091512 | 73812981  | 73817313  | 73818213  | 7381894!  |
| 307 NA12872 | [2515685 chr11 | 11 | 81179059  | 81197694  | 18636  | 15  | -0.810944 | 0.041805 | 81178883  | 81179236  | 81194614  | 8120214!  |
| 308 NA12872 | [2515685 chr11 | 11 | 84215920  | 84248794  | 32875  | 22  | -0.748451 | 0.035338 | 84214581  | 84217259  | 84248445  | 8424914!  |
| 309 NA12872 | [2515685 chr11 | 11 | 134107699 | 134112290 | 4592   | 5   | 0.739236  | 0.071237 | 134106591 | 134108808 | 134111845 | 13411273! |
| 310 NA12872 | [2515685 chr12 | 12 | 737326    | 744802    | 7477   | 8   | 0.999369  | 0.052608 | 737064    | 737588    | 744211    | 745394!   |
| 311 NA12872 | [2515685 chr12 | 12 | 2116865   | 2127044   | 10180  | 13  | -1.429166 | 0.054221 | 2116538   | 2117192   | 2126809   | 2127279!  |
| 312 NA12872 | [2515685 chr12 | 12 | 9524239   | 9610804   | 86566  | 94  | 0.693094  | 0.016495 | 9523968   | 9524510   | 9610082   | 961152!   |
| 313 NA12872 | [2515685 chr12 | 12 | 9616656   | 9624971   | 8316   | 9   | 0.444918  | 0.050471 | 9616460   | 9616852   | 9623223   | 962672!   |
| 314 NA12872 | [2515685 chr12 | 12 | 11068263  | 11184613  | 116351 | 124 | -0.297603 | 0.013061 | 11067734  | 11068793  | 11184213  | 1118501!  |
| 315 NA12872 | [2515685 chr12 | 12 | 11398049  | 11463223  | 65175  | 66  | -0.278264 | 0.017864 | 11397507  | 11398591  | 11459990  | 1146645!  |
| 316 NA12872 | [2515685 chr12 | 12 | 17847674  | 17857072  | 9399   | 6   | 0.556132  | 0.05917  | 17847427  | 17847922  | 17856109  | 1785803!  |
| 317 NA12872 | [2515685 chr12 | 12 | 30348930  | 30352723  | 3794   | 3   | 0.450576  | 0.079766 | 30348429  | 30349431  | 30351682  | 3035376!  |
| 318 NA12872 | [2515685 chr12 | 12 | 31155331  | 31244780  | 89450  | 84  | 0.402863  | 0.016093 | 31155092  | 31155571  | 31244217  | 3124534!  |
| 319 NA12872 | [2515685 chr12 | 12 | 46994634  | 46995975  | 1342   | 2   | -0.710911 | 0.13028  | 46994358  | 46994911  | 46995667  | 4699628!  |
| 320 NA12872 | [2515685 chr12 | 12 | 98296195  | 98302019  | 5825   | 12  | -0.72549  | 0.043362 | 98295885  | 98296506  | 98298530  | 9830594!  |
| 321 NA12872 | [2515685 chr12 | 12 | 128864324 | 128869047 | 4724   | 14  | -0.51094  | 0.026247 | 128863938 | 128864711 | 128867605 | 12887048! |
| 322 NA12872 | [2515685 chr12 | 12 | 130257877 | 130259876 | 2000   | 3   | -0.48333  | 0.076828 | 130257493 | 130258262 | 130259649 | 13026010! |
| 323 NA12872 | [2515685 chr12 | 12 | 131046250 | 131046750 | 501    | 2   | 1.135789  | 0.128723 | 131046129 | 131046371 | 131046551 | 13104694! |
| 324 NA12872 | [2515685 chr13 | 13 | 18094835  | 18101592  | 6758   | 10  | 0.254891  | 0.045364 | 18094553  | 18095118  | 18101375  | 1810180!  |
| 325 NA12872 | [2515685 chr13 | 13 | 25947233  | 25950398  | 3166   | 3   | 2.99335   | 0.14442  | 25946194  | 25948272  | 25949415  | 2595138!  |
| 326 NA12872 | [2515685 chr13 | 13 | 33029575  | 33043421  | 13847  | 9   | 0.756912  | 0.054851 | 33000262  | 33034253  | 33042925  | 3304391!  |
| 327 NA12872 | [2515685 chr13 | 13 | 33852305  | 33853351  | 1047   | 2   | -0.539776 | 0.099365 | 33852033  | 33852578  | 33853063  | 3385363!  |
| 328 NA12872 | [2515685 chr13 | 13 | 36971484  | 36983475  | 11992  | 10  | -0.835332 | 0.053239 | 36969416  | 36973552  | 36982905  | 3698404!  |
| 329 NA12872 | [2515685 chr13 | 13 | 56653890  | 56687244  | 33355  | 31  | -0.825176 | 0.029428 | 56650401  | 56657380  | 56686891  | 5668759!  |
| 330 NA12872 | [2515685 chr13 | 13 | 69633905  | 69673289  | 39385  | 42  | 0.742073  | 0.02461  | 69633412  | 69634399  | 69672985  | 6967359!  |
| 331 NA12872 | [2515685 chr13 | 13 | 109215660 | 109219740 | 4081   | 9   | -0.289287 | 0.049042 | 109215230 | 109216090 | 109219483 | 10921999! |
| 332 NA12872 | [2515685 chr13 | 13 | 110502383 | 110503129 | 747    | 3   | -0.699403 | 0.091881 | 110502225 | 110502541 | 110502890 | 11050336! |
| 333 NA12872 | [2515685 chr13 | 13 | 113079647 | 113086816 | 7170   | 3   | 0.670535  | 0.085424 | 113078890 | 113080404 | 113082138 | 11309434! |
| 334 NA12872 | [2515685 chr14 | 14 | 18527136  | 18544459  | 17324  | 9   | -0.695507 | 0.048838 | 18526373  | 18527899  | 18544131  | 1854478!  |
| 335 NA12872 | [2515685 chr14 | 14 | 18550423  | 18567580  | 17158  | 31  | -0.363101 | 0.023818 | 18550022  | 18550824  | 18566846  | 1856831!  |
| 336 NA12872 | [2515685 chr14 | 14 | 18579242  | 18615389  | 36148  | 40  | -0.349712 | 0.021949 | 18579011  | 18579473  | 18614741  | 1861603!  |
| 337 NA12872 | [2515685 chr14 | 14 | 18720801  | 18750673  | 29873  | 48  | -0.340203 | 0.01912  | 18720197  | 18721406  | 18750497  | 1875085!  |
| 338 NA12872 | [2515685 chr14 | 14 | 18762777  | 18780118  | 17342  | 32  | -0.340758 | 0.023681 | 18762736  | 18762818  | 18779833  | 1878040!  |
| 339 NA12872 | [2515685 chr14 | 14 | 18935340  | 18994562  | 59223  | 106 | -0.314254 | 0.013116 | 18935011  | 18935670  | 18993957  | 1899516!  |
| 340 NA12872 | [2515685 chr14 | 14 | 19095788  | 19135482  | 39695  | 46  | -0.336057 | 0.019492 | 19095757  | 19095820  | 19135280  | 1913568!  |
| 341 NA12872 | [2515685 chr14 | 14 | 19145876  | 19152439  | 6564   | 14  | -0.40947  | 0.036848 | 19145143  | 19146610  | 19152098  | 1915278!  |
| 342 NA12872 | [2515685 chr14 | 14 | 19265232  | 19494842  | 229611 | 212 | 0.252137  | 0.009865 | 19261661  | 19268804  | 19494444  | 1949524!  |
| 343 NA12872 | [2515685 chr14 | 14 | 32022775  | 32026140  | 3366   | 2   | -1.186691 | 0.130258 | 32022274  | 32023276  | 32023749  | 3202853!  |
| 344 NA12872 | [2515685 chr14 | 14 | 40679041  | 40739449  | 60409  | 57  | -0.841774 | 0.02127  | 40678078  | 40680005  | 40739212  | 4073968!  |
| 345 NA12872 | [2515685 chr14 | 14 | 41983819  | 41985303  | 1485   | 2   | -0.613811 | 0.107779 | 41983366  | 41984273  | 41985001  | 4198560!  |
| 346 NA12872 | [2515685 chr14 | 14 | 42059344  | 42062997  | 3654   | 2   | 0.752266  | 0.113821 | 42056485  | 42062203  | 42062601  | 4206339!  |
| 347 NA12872 | [2515685 chr14 | 14 | 73063171  | 73119729  | 56559  | 51  | 0.436656  | 0.019979 | 73061866  | 73064476  | 73118276  | 7312118!  |
| 348 NA12872 | [2515685 chr14 | 14 | 77193994  | 77196644  | 2651   | 3   | 0.449466  | 0.076311 | 77193776  | 77194213  | 77196380  | 7719690!  |
| 349 NA12872 | [2515685 chr14 | 14 | 104766812 | 104778505 | 11694  | 145 | -0.523279 | 0.008902 | 104766457 | 104767167 | 104778286 | 10477872! |
| 350 NA12872 | [2515685 chr15 | 15 | 18555968  | 18557255  | 1288   | 2   | -0.63675  | 0.108697 | 18555543  | 18556394  | 18556441  | 1855806!  |
| 351 NA12872 | [2515685 chr15 | 15 | 19013084  | 19026347  | 13264  | 17  | -0.268709 | 0.027516 | 19012916  | 19013253  | 19025206  | 1902748!  |

|             |                |    |          |          |        |     |           |          |          |          |          |          |
|-------------|----------------|----|----------|----------|--------|-----|-----------|----------|----------|----------|----------|----------|
| 352 NA12872 | [2515685 chr15 | 15 | 19218887 | 19227401 | 8515   | 10  | 0.440387  | 0.047548 | 19218462 | 19219313 | 19227233 | 19227571 |
| 353 NA12872 | [2515685 chr15 | 15 | 19462326 | 19466745 | 4420   | 4   | 0.589809  | 0.073543 | 19461886 | 19462767 | 19466696 | 1946679  |
| 354 NA12872 | [2515685 chr15 | 15 | 19843733 | 19845597 | 1865   | 4   | -0.667201 | 0.072713 | 19843516 | 19843950 | 19845254 | 1984594  |
| 355 NA12872 | [2515685 chr15 | 15 | 19878004 | 19883216 | 5213   | 8   | -0.559602 | 0.055165 | 19877399 | 19878609 | 19882739 | 1988369  |
| 356 NA12872 | [2515685 chr15 | 15 | 19948265 | 19970365 | 22101  | 28  | -0.263011 | 0.02814  | 19946910 | 19949620 | 19970015 | 19970711 |
| 357 NA12872 | [2515685 chr15 | 15 | 20199244 | 20252359 | 53116  | 104 | -0.332981 | 0.012701 | 20198407 | 20200082 | 20251841 | 2025287  |
| 358 NA12872 | [2515685 chr15 | 15 | 20371611 | 20383831 | 12221  | 17  | -0.44009  | 0.031964 | 20367922 | 20373912 | 20383079 | 2038458  |
| 359 NA12872 | [2515685 chr15 | 15 | 20640250 | 20682839 | 42590  | 51  | -0.272652 | 0.020384 | 20638816 | 20641684 | 20682606 | 2068307  |
| 360 NA12872 | [2515685 chr15 | 15 | 21605983 | 21614599 | 8617   | 8   | 0.733401  | 0.06134  | 21605507 | 21606459 | 21612298 | 2163669  |
| 361 NA12872 | [2515685 chr15 | 15 | 24986053 | 24992250 | 6198   | 7   | 0.725502  | 0.061814 | 24985426 | 24986680 | 24991680 | 2499282  |
| 362 NA12872 | [2515685 chr15 | 15 | 26321176 | 26553418 | 232243 | 275 | -0.317229 | 0.007816 | 26320060 | 26322293 | 26552290 | 2655454  |
| 363 NA12872 | [2515685 chr15 | 15 | 32469460 | 32663929 | 194470 | 198 | 0.274705  | 0.009445 | 32469063 | 32469858 | 32663325 | 3266453  |
| 364 NA12872 | [2515685 chr15 | 15 | 39889385 | 39890850 | 1466   | 2   | 0.522336  | 0.100366 | 39888917 | 39889854 | 39890418 | 3989128  |
| 365 NA12872 | [2515685 chr15 | 15 | 66450268 | 66451800 | 1533   | 2   | -0.661972 | 0.114158 | 66449997 | 66450539 | 66451265 | 6645233  |
| 366 NA12872 | [2515685 chr15 | 15 | 74671388 | 74682819 | 11432  | 9   | 0.811674  | 0.054788 | 74671122 | 74671654 | 74680518 | 7468951  |
| 367 NA12872 | [2515685 chr15 | 15 | 75117585 | 75118816 | 1232   | 2   | -2.726356 | 0.218676 | 75117343 | 75117827 | 75118392 | 7511924  |
| 368 NA12872 | [2515685 chr15 | 15 | 75118816 | 75119946 | 1131   | 2   | -0.845621 | 0.117207 | 75118392 | 75119240 | 75119741 | 7512015  |
| 369 NA12872 | [2515685 chr15 | 15 | 80437061 | 80439837 | 2777   | 7   | 0.333181  | 0.047369 | 80436487 | 80437636 | 80438703 | 8044097  |
| 370 NA12872 | [2515685 chr15 | 15 | 80744566 | 80773331 | 28766  | 25  | 0.271427  | 0.023328 | 80743980 | 80745152 | 80773241 | 8077342  |
| 371 NA12872 | [2515685 chr15 | 15 | 80823554 | 80826190 | 2637   | 7   | 0.333181  | 0.047369 | 80822980 | 80824129 | 80825196 | 8082718  |
| 372 NA12872 | [2515685 chr15 | 15 | 95617173 | 95635464 | 18292  | 8   | -0.805845 | 0.057598 | 95616758 | 95617589 | 95633163 | 9565465  |
| 373 NA12872 | [2515685 chr15 | 15 | 98234084 | 98240716 | 6633   | 8   | -2.009323 | 0.09434  | 98233842 | 98234327 | 98239350 | 9824208  |
| 374 NA12872 | [2515685 chr16 | 16 | 12563891 | 12565579 | 1689   | 2   | -0.58453  | 0.10392  | 12563523 | 12564260 | 12565191 | 1256596  |
| 375 NA12872 | [2515685 chr16 | 16 | 14696077 | 14703775 | 7699   | 5   | -0.26846  | 0.045808 | 14695838 | 14696316 | 14703313 | 1470423  |
| 376 NA12872 | [2515685 chr16 | 16 | 14735195 | 14742897 | 7703   | 5   | -0.268462 | 0.045808 | 14734956 | 14735434 | 14742435 | 1474335  |
| 377 NA12872 | [2515685 chr16 | 16 | 15133678 | 15134219 | 542    | 3   | 0.486568  | 0.067343 | 15133476 | 15133880 | 15133945 | 1513449  |
| 378 NA12872 | [2515685 chr16 | 16 | 16364956 | 16368793 | 3838   | 11  | 0.413702  | 0.045081 | 16364757 | 16365156 | 16368675 | 1636891  |
| 379 NA12872 | [2515685 chr16 | 16 | 16633469 | 16639120 | 5652   | 4   | 0.816115  | 0.077696 | 16632502 | 16634437 | 16638386 | 1663985  |
| 380 NA12872 | [2515685 chr16 | 16 | 18382888 | 18389829 | 6942   | 24  | 0.318221  | 0.026866 | 18382735 | 18383042 | 18389520 | 1839013  |
| 381 NA12872 | [2515685 chr16 | 16 | 21476301 | 21502620 | 26320  | 18  | 0.365348  | 0.033921 | 21475893 | 21476709 | 21501101 | 2150414  |
| 382 NA12872 | [2515685 chr16 | 16 | 22460423 | 22618743 | 158321 | 145 | 0.26092   | 0.011101 | 22460417 | 22460429 | 22617181 | 2262030  |
| 383 NA12872 | [2515685 chr16 | 16 | 28617225 | 28628869 | 11645  | 12  | 0.267901  | 0.043011 | 28615757 | 28618694 | 28628377 | 2862936  |
| 384 NA12872 | [2515685 chr16 | 16 | 30101364 | 30102578 | 1215   | 2   | 0.690766  | 0.110332 | 30101045 | 30101684 | 30102223 | 3010293  |
| 385 NA12872 | [2515685 chr16 | 16 | 32106365 | 32106861 | 497    | 3   | 0.43772   | 0.083184 | 32106136 | 32106595 | 32106686 | 3210703  |
| 386 NA12872 | [2515685 chr16 | 16 | 32159898 | 32160377 | 480    | 2   | -1.046683 | 0.08509  | 32159453 | 32160343 | 32160346 | 3216040  |
| 387 NA12872 | [2515685 chr16 | 16 | 32606692 | 32607163 | 472    | 2   | -1.046683 | 0.08509  | 32606661 | 32606724 | 32606727 | 3260759  |
| 388 NA12872 | [2515685 chr16 | 16 | 32660208 | 32660703 | 496    | 3   | 0.437723  | 0.083184 | 32660033 | 32660384 | 32660474 | 3266093  |
| 389 NA12872 | [2515685 chr16 | 16 | 33047346 | 33047842 | 497    | 3   | 0.43772   | 0.083184 | 33047117 | 33047575 | 33047666 | 3304801  |
| 390 NA12872 | [2515685 chr16 | 16 | 33100875 | 33101346 | 472    | 2   | -1.046684 | 0.08509  | 33100438 | 33101312 | 33101315 | 3310137  |
| 391 NA12872 | [2515685 chr16 | 16 | 33157406 | 33157879 | 474    | 2   | -1.04669  | 0.08509  | 33156967 | 33157845 | 33157848 | 3315791  |
| 392 NA12872 | [2515685 chr16 | 16 | 68682276 | 68685390 | 3115   | 2   | -0.638717 | 0.110788 | 68681902 | 68682651 | 68685071 | 6868571  |
| 393 NA12872 | [2515685 chr16 | 16 | 68703515 | 68755580 | 52066  | 58  | -0.265737 | 0.019188 | 68702955 | 68704076 | 68755265 | 6875589  |
| 394 NA12872 | [2515685 chr16 | 16 | 76932229 | 76942282 | 10054  | 8   | -1.286044 | 0.064491 | 76931263 | 76933196 | 76941602 | 7694296  |
| 395 NA12872 | [2515685 chr16 | 16 | 84561410 | 84565235 | 3826   | 12  | 0.274416  | 0.042967 | 84561136 | 84561685 | 84565142 | 8456532  |
| 396 NA12872 | [2515685 chr17 | 17 | 18297898 | 18327100 | 29203  | 40  | 0.272665  | 0.023012 | 18297765 | 18298031 | 18326880 | 1832732  |
| 397 NA12872 | [2515685 chr17 | 17 | 18331739 | 18332345 | 607    | 2   | -0.5916   | 0.101365 | 18331509 | 18331970 | 18331978 | 1833271  |
| 398 NA12872 | [2515685 chr17 | 17 | 20299935 | 20300531 | 597    | 2   | -0.591598 | 0.101365 | 20299568 | 20300303 | 20300311 | 2030075  |
| 399 NA12872 | [2515685 chr17 | 17 | 21942843 | 21954469 | 11627  | 19  | -0.372116 | 0.033494 | 21942618 | 21943068 | 21954310 | 2195462  |
| 400 NA12872 | [2515685 chr17 | 17 | 32829500 | 32833231 | 3732   | 5   | 0.858217  | 0.073859 | 32828825 | 32830175 | 32832670 | 3283379  |
| 401 NA12872 | [2515685 chr17 | 17 | 36675530 | 36685343 | 9814   | 10  | -0.672272 | 0.050363 | 36675011 | 36676049 | 36684647 | 3668604  |
| 402 NA12872 | [2515685 chr17 | 17 | 41011870 | 41060451 | 48582  | 47  | 0.285059  | 0.021115 | 41011558 | 41012183 | 41058251 | 4106269  |
| 403 NA12872 | [2515685 chr17 | 17 | 41568884 | 41724965 | 156082 | 154 | 0.454096  | 0.011952 | 41568208 | 41569561 | 41724205 | 4172572  |
| 404 NA12872 | [2515685 chr17 | 17 | 48509183 | 48510342 | 1160   | 2   | -0.649205 | 0.118162 | 48508969 | 48509398 | 48509953 | 4851073  |
| 405 NA12872 | [2515685 chr17 | 17 | 60340709 | 60358929 | 18221  | 12  | 0.495639  | 0.043601 | 60339551 | 60341867 | 60357902 | 6035995  |
| 406 NA12872 | [2515685 chr18 | 18 | 14774537 | 14807462 | 32926  | 43  | -0.278755 | 0.020155 | 14774248 | 14774826 | 14807200 | 1480772  |

|             |                |    |           |           |        |     |           |          |           |           |           |           |
|-------------|----------------|----|-----------|-----------|--------|-----|-----------|----------|-----------|-----------|-----------|-----------|
| 407 NA12872 | [2515685 chr18 | 18 | 28142218  | 28143399  | 1182   | 2   | 0.670386  | 0.121254 | 28141854  | 28142583  | 28143055  | 2814374-  |
| 408 NA12872 | [2515685 chr18 | 18 | 61874791  | 61883105  | 8315   | 9   | -0.876412 | 0.053131 | 61874483  | 61875100  | 61882738  | 6188347:  |
| 409 NA12872 | [2515685 chr18 | 18 | 61917747  | 61920171  | 2425   | 4   | 2.193395  | 0.123267 | 61917522  | 61917973  | 61919646  | 6192069:  |
| 410 NA12872 | [2515685 chr18 | 18 | 74230393  | 74234275  | 3883   | 31  | -0.626306 | 0.016317 | 74229835  | 74230952  | 74234139  | 7423441:  |
| 411 NA12872 | [2515685 chr18 | 18 | 74373005  | 74379534  | 6530   | 10  | 0.262751  | 0.032    | 74372064  | 74373947  | 74378860  | 7438020:  |
| 412 NA12872 | [2515685 chr18 | 18 | 74392800  | 74397377  | 4578   | 3   | 0.82225   | 0.101043 | 74390826  | 74394774  | 74396965  | 7439779:  |
| 413 NA12872 | [2515685 chr19 | 19 | 310414    | 312953    | 2540   | 14  | -0.614424 | 0.039903 | 309687    | 311142    | 312913    | 312994    |
| 414 NA12872 | [2515685 chr19 | 19 | 1200296   | 1202522   | 2227   | 3   | 0.722655  | 0.091497 | 1199725   | 1200868   | 1202197   | 120284:   |
| 415 NA12872 | [2515685 chr19 | 19 | 8708780   | 8763535   | 54756  | 94  | 0.366109  | 0.009941 | 8708296   | 8709264   | 8763160   | 876391:   |
| 416 NA12872 | [2515685 chr19 | 19 | 23007904  | 23013252  | 5349   | 5   | 0.860565  | 0.078221 | 22990964  | 23010431  | 23012979  | 2301352:  |
| 417 NA12872 | [2515685 chr19 | 19 | 23108259  | 23109446  | 1188   | 2   | 1.237494  | 0.123161 | 23107903  | 23108615  | 23108879  | 2311001-  |
| 418 NA12872 | [2515685 chr19 | 19 | 39419837  | 39421349  | 1513   | 3   | 0.537149  | 0.091827 | 39419616  | 39420059  | 39421018  | 3942168:  |
| 419 NA12872 | [2515685 chr19 | 19 | 40543556  | 40545135  | 1580   | 3   | -2.325688 | 0.134364 | 40543292  | 40543821  | 40544782  | 4054548:  |
| 420 NA12872 | [2515685 chr19 | 19 | 40547370  | 40553596  | 6227   | 2   | -3.890992 | 0.228408 | 40546632  | 40548109  | 40553353  | 4055384:  |
| 421 NA12872 | [2515685 chr19 | 19 | 58210435  | 58244458  | 34024  | 26  | -0.324357 | 0.029007 | 58209863  | 58211007  | 58243893  | 5824502-  |
| 422 NA12872 | [2515685 chr19 | 19 | 59419268  | 59434606  | 15339  | 19  | 0.440071  | 0.033266 | 59418762  | 59419774  | 59434186  | 5943502:  |
| 423 NA12872 | [2515685 chr19 | 19 | 59492384  | 59498950  | 6567   | 7   | 0.313607  | 0.053088 | 59491977  | 59492791  | 59497077  | 5950082:  |
| 424 NA12872 | [2515685 chr19 | 19 | 60958920  | 60976029  | 17110  | 15  | -0.473323 | 0.038353 | 60959733  | 60959907  | 60975748  | 6097631:  |
| 425 NA12872 | [2515685 chr20 | 20 | 15249645  | 15251805  | 2161   | 2   | -0.811114 | 0.099994 | 15249381  | 15249909  | 15251287  | 1525232:  |
| 426 NA12872 | [2515685 chr20 | 20 | 28035722  | 28099743  | 64022  | 71  | -0.295504 | 0.016877 | 28035414  | 28036031  | 28099592  | 2809989:  |
| 427 NA12872 | [2515685 chr20 | 20 | 49817373  | 49819212  | 1840   | 2   | 0.783899  | 0.12068  | 49816867  | 49817880  | 49818962  | 4981946:  |
| 428 NA12872 | [2515685 chr20 | 20 | 59950373  | 59957050  | 6678   | 19  | 0.44488   | 0.030678 | 59950066  | 59950681  | 59956538  | 5995756:  |
| 429 NA12872 | [2515685 chr20 | 20 | 61752758  | 61754878  | 2121   | 2   | -0.462488 | 0.083293 | 61752142  | 61753375  | 61754167  | 6175558:  |
| 430 NA12872 | [2515685 chr20 | 20 | 62066380  | 62068214  | 1835   | 8   | 1.64169   | 0.058056 | 62066146  | 62066615  | 62067671  | 6206875:  |
| 431 NA12872 | [2515685 chr21 | 21 | 13716094  | 13723694  | 7601   | 10  | -0.28932  | 0.045247 | 13715627  | 13716561  | 13723457  | 1372393:  |
| 432 NA12872 | [2515685 chr21 | 21 | 14012497  | 14015193  | 2697   | 5   | 0.463162  | 0.062635 | 14011969  | 14013026  | 14014884  | 1401550:  |
| 433 NA12872 | [2515685 chr22 | 22 | 14474806  | 14830910  | 356105 | 664 | -0.250328 | 0.005017 | 14474622  | 14474991  | 14830451  | 1483136:  |
| 434 NA12872 | [2515685 chr22 | 22 | 17032140  | 17249803  | 217664 | 353 | 0.288311  | 0.006909 | 17031480  | 17032801  | 17249433  | 1725017-  |
| 435 NA12872 | [2515685 chr22 | 22 | 18701702  | 18734175  | 32474  | 45  | 0.301462  | 0.01932  | 18701563  | 18701841  | 18733858  | 1873449:  |
| 436 NA12872 | [2515685 chr22 | 22 | 18747174  | 18752654  | 5481   | 3   | -0.515289 | 0.079145 | 18746777  | 18747571  | 18752340  | 1875296:  |
| 437 NA12872 | [2515685 chr22 | 22 | 18947502  | 18976315  | 28814  | 45  | 0.317373  | 0.01909  | 18947184  | 18947821  | 18975978  | 1897665:  |
| 438 NA12872 | [2515685 chr22 | 22 | 19022410  | 19041529  | 19120  | 19  | 0.346472  | 0.031634 | 19022072  | 19022748  | 19040908  | 1904215:  |
| 439 NA12872 | [2515685 chr22 | 22 | 19789638  | 20003066  | 213429 | 350 | 0.298019  | 0.006921 | 19788642  | 19790634  | 20002927  | 2000320:  |
| 440 NA12872 | [2515685 chr22 | 22 | 20140939  | 20146413  | 5475   | 3   | -0.515289 | 0.079145 | 20140542  | 20141336  | 20146100  | 2014672:  |
| 441 NA12872 | [2515685 chr22 | 22 | 22611178  | 22617550  | 6373   | 8   | -0.261831 | 0.016452 | 22609725  | 22612631  | 22617295  | 2261780:  |
| 442 NA12872 | [2515685 chr22 | 22 | 22623673  | 22654546  | 30874  | 67  | -0.261831 | 0.016452 | 22623407  | 22623940  | 22653118  | 2265597:  |
| 443 NA12872 | [2515685 chr22 | 22 | 22667089  | 22672162  | 5074   | 8   | 0.427609  | 0.053219 | 22666536  | 22667642  | 22671933  | 2267239:  |
| 444 NA12872 | [2515685 chr22 | 22 | 22672624  | 22720154  | 47531  | 49  | 0.990392  | 0.025142 | 22672391  | 22672858  | 22719882  | 2272042:  |
| 445 NA12872 | [2515685 chr22 | 22 | 22721179  | 22729265  | 8087   | 11  | 0.39557   | 0.042083 | 22720466  | 22721893  | 22728912  | 2272961:  |
| 446 NA12872 | [2515685 chr22 | 22 | 33619409  | 33623490  | 4082   | 5   | 0.782453  | 0.064378 | 33618939  | 33619879  | 33622642  | 3362433:  |
| 447 NA12872 | [2515685 chr22 | 22 | 36466389  | 36468008  | 1620   | 2   | 0.631534  | 0.123981 | 36466071  | 36466707  | 36467496  | 3646852:  |
| 448 NA12872 | [2515685 chr22 | 22 | 37618794  | 37624009  | 5216   | 7   | -3.618792 | 0.122155 | 37618728  | 37618860  | 37621331  | 3762705:  |
| 449 NA12872 | [2515685 chr22 | 22 | 43418479  | 43419675  | 1197   | 2   | 0.736515  | 0.09599  | 43418051  | 43418907  | 43419378  | 4341997:  |
| 450 NA12872 | [2515685 chrX  | 23 | 655376    | 657388    | 2013   | 4   | -0.832143 | 0.083722 | 655166    | 655586    | 656091    | 658686    |
| 451 NA12872 | [2515685 chrX  | 23 | 2286200   | 2288297   | 2098   | 2   | 0.722439  | 0.086246 | 2285671   | 2286730   | 2287550   | 228904:   |
| 452 NA12872 | [2515685 chrX  | 23 | 48917446  | 49070905  | 153460 | 116 | -0.486983 | 0.008996 | 48917258  | 48917635  | 49070239  | 4907157:  |
| 453 NA12872 | [2515685 chrX  | 23 | 57518837  | 57559934  | 41098  | 7   | -0.391123 | 0.075461 | 57518804  | 57518871  | 57555967  | 5758632:  |
| 454 NA12872 | [2515685 chrX  | 23 | 114783411 | 114796920 | 13510  | 35  | -0.472693 | 0.012986 | 114783196 | 114783627 | 114796162 | 1147976:  |
| 455 NA12872 | [2515685 chrX  | 23 | 114804126 | 114821023 | 16898  | 36  | -0.472693 | 0.012986 | 114803617 | 114804636 | 114817056 | 11483607: |
| 456 NA12872 | [2515685 chrX  | 23 | 115170476 | 115171520 | 1045   | 2   | 0.666278  | 0.103726 | 115170396 | 115170556 | 115170717 | 11517232: |
| 457 NA12872 | [2515685 chrX  | 23 | 134569408 | 134698023 | 128616 | 224 | 0.290172  | 0.007309 | 134569294 | 134569522 | 134696803 | 13469924  |
| 458 NA12872 | [2515685 chrX  | 23 | 139806116 | 139834048 | 27933  | 46  | 0.394456  | 0.015572 | 139802399 | 139809834 | 139830081 | 13984227: |
| 459 NA12872 | [2515685 chrX  | 23 | 140043042 | 140066703 | 23662  | 27  | 0.357485  | 0.021661 | 140042826 | 140043259 | 140062736 | 14007331  |
| 460 NA12872 | [2515685 chrX  | 23 | 140386675 | 140413881 | 27207  | 48  | 0.405118  | 0.015728 | 140378397 | 140390642 | 140411067 | 14041669  |
| 461 NA12872 | [2515685 chrX  | 23 | 140500461 | 140513745 | 13285  | 26  | 0.391204  | 0.022056 | 140492162 | 140504428 | 140512707 | 14051478  |

|             |               |    |           |           |        |     |           |          |           |           |           |          |
|-------------|---------------|----|-----------|-----------|--------|-----|-----------|----------|-----------|-----------|-----------|----------|
| 462 NA12872 | [2515685 chrX | 23 | 145885412 | 145891435 | 6024   | 3   | -3.298704 | 0.184937 | 145885185 | 145885639 | 145891255 | 14589161 |
| 463 NA12872 | [2515685 chrX | 23 | 146068677 | 146075231 | 6555   | 16  | 0.25251   | 0.032343 | 146068435 | 146068920 | 146074535 | 14607592 |
| 464 NA12872 | [2515685 chrY | 24 | 655376    | 657388    | 2013   | 4   | -0.832143 | 0.083722 | 655166    | 655586    | 656091    | 658686   |
| 465 NA12872 | [2515685 chrY | 24 | 2286200   | 2288297   | 2098   | 2   | 0.722439  | 0.086246 | 2285671   | 2286730   | 2287550   | 2289045  |
| 466 NA12872 | [2515685 chrY | 24 | 21995100  | 22051534  | 56435  | 186 | 0.299186  | 0.007106 | 21994995  | 21995205  | 22050614  | 2205245  |
| 467 NA12872 | [2515685 chrY | 24 | 22362148  | 22402723  | 40576  | 135 | 0.30308   | 0.008209 | 22361228  | 22363068  | 22402524  | 2240292  |
| 468 NA12872 | [2515685 chrY | 24 | 22650628  | 22671548  | 20921  | 70  | 0.284133  | 0.012013 | 22649721  | 22651535  | 22671238  | 2267185  |
| 469 NA12872 | [2515685 chrY | 24 | 22797835  | 22798350  | 516    | 2   | 0.39897   | 0.06368  | 22797713  | 22797957  | 22797960  | 2279874  |
| 470 NA12872 | [2515685 chrY | 24 | 22883410  | 22905218  | 21809  | 69  | 0.281156  | 0.012105 | 22883100  | 22883721  | 22905194  | 2290524  |
| 1 NA18853   | [2515685 chr1 | 1  | 29401     | 76985     | 47585  | 55  | 0.611715  | 0.020018 | 27752     | 31050     | 76641     | 77329    |
| 2 NA18853   | [2515685 chr1 | 1  | 601045    | 612159    | 11115  | 8   | -1.333898 | 0.057355 | 587801    | 604315    | 610122    | 614196   |
| 3 NA18853   | [2515685 chr1 | 1  | 1853012   | 1854645   | 1634   | 2   | 0.822084  | 0.101801 | 1852616   | 1853409   | 1853816   | 185547   |
| 4 NA18853   | [2515685 chr1 | 1  | 10304191  | 10312662  | 8472   | 7   | -0.662471 | 0.059126 | 10303236  | 10305146  | 10312212  | 1031311  |
| 5 NA18853   | [2515685 chr1 | 1  | 10416438  | 10418311  | 1874   | 2   | -0.744484 | 0.101653 | 10415863  | 10417014  | 10417712  | 1041891  |
| 6 NA18853   | [2515685 chr1 | 1  | 12677860  | 12681083  | 3224   | 3   | -0.499648 | 0.092261 | 12677413  | 12678308  | 12679940  | 1268222  |
| 7 NA18853   | [2515685 chr1 | 1  | 12829124  | 12858869  | 29746  | 47  | 0.281895  | 0.020168 | 12828579  | 12829669  | 12857222  | 1286051  |
| 8 NA18853   | [2515685 chr1 | 1  | 12884329  | 12886858  | 2530   | 4   | 0.50825   | 0.057979 | 12884224  | 12884434  | 12886536  | 1288718  |
| 9 NA18853   | [2515685 chr1 | 1  | 13124784  | 13125221  | 438    | 2   | 0.623469  | 0.095063 | 13124609  | 13124960  | 13124977  | 1312546  |
| 10 NA18853  | [2515685 chr1 | 1  | 13159940  | 13162706  | 2767   | 4   | 0.554031  | 0.053894 | 13159618  | 13160263  | 13162366  | 1316304  |
| 11 NA18853  | [2515685 chr1 | 1  | 13380737  | 13383503  | 2767   | 4   | 0.554031  | 0.053894 | 13380415  | 13381060  | 13383163  | 1338384  |
| 12 NA18853  | [2515685 chr1 | 1  | 16990666  | 17000441  | 9776   | 11  | 0.276867  | 0.044806 | 16990435  | 16990898  | 16999783  | 1700110  |
| 13 NA18853  | [2515685 chr1 | 1  | 25330302  | 25409968  | 79667  | 79  | 0.296511  | 0.016017 | 25329943  | 25330662  | 25409763  | 2541017  |
| 14 NA18853  | [2515685 chr1 | 1  | 25434181  | 25439981  | 5801   | 14  | 0.327619  | 0.039299 | 25433990  | 25434373  | 25438920  | 2544104  |
| 15 NA18853  | [2515685 chr1 | 1  | 53712597  | 53714404  | 1808   | 2   | -0.741709 | 0.10392  | 53712284  | 53712911  | 53714100  | 5371470  |
| 16 NA18853  | [2515685 chr1 | 1  | 55013192  | 55017138  | 3947   | 4   | -0.810613 | 0.079076 | 55012686  | 55013699  | 55015642  | 5501863  |
| 17 NA18853  | [2515685 chr1 | 1  | 57259472  | 57261898  | 2427   | 2   | 0.598639  | 0.114687 | 57259022  | 57259922  | 57261075  | 5726272  |
| 18 NA18853  | [2515685 chr1 | 1  | 72478372  | 72524180  | 45809  | 36  | 0.82522   | 0.025679 | 72478140  | 72478604  | 72523661  | 7252470  |
| 19 NA18853  | [2515685 chr1 | 1  | 89188117  | 89190762  | 2646   | 5   | 1.586214  | 0.087016 | 89187764  | 89188470  | 89190458  | 8919106  |
| 20 NA18853  | [2515685 chr1 | 1  | 94869509  | 94870854  | 1346   | 3   | 0.467459  | 0.072764 | 94869219  | 94869799  | 94870647  | 9487106  |
| 21 NA18853  | [2515685 chr1 | 1  | 100154289 | 100155903 | 1615   | 2   | 0.598268  | 0.099767 | 100153890 | 100154689 | 100155558 | 10015624 |
| 22 NA18853  | [2515685 chr1 | 1  | 105728161 | 105735462 | 7302   | 8   | -3.644189 | 0.117192 | 105727820 | 105728503 | 105734532 | 10573639 |
| 23 NA18853  | [2515685 chr1 | 1  | 108444641 | 108449550 | 4910   | 9   | 0.684997  | 0.050732 | 108443817 | 108445466 | 108449224 | 10844987 |
| 24 NA18853  | [2515685 chr1 | 1  | 108514938 | 108549101 | 34164  | 51  | 0.329204  | 0.020855 | 108514864 | 108515012 | 108548555 | 10854964 |
| 25 NA18853  | [2515685 chr1 | 1  | 108638318 | 108688767 | 50450  | 59  | 0.325492  | 0.019447 | 108638254 | 108638383 | 108688693 | 10868884 |
| 26 NA18853  | [2515685 chr1 | 1  | 109936541 | 109953240 | 16700  | 22  | 0.506596  | 0.031097 | 109935803 | 109937279 | 109952761 | 10995372 |
| 27 NA18853  | [2515685 chr1 | 1  | 112405902 | 112416691 | 10790  | 10  | 0.57667   | 0.050072 | 112405415 | 112406389 | 112416423 | 11241696 |
| 28 NA18853  | [2515685 chr1 | 1  | 142744385 | 142745273 | 889    | 2   | 0.804514  | 0.117546 | 142743794 | 142744976 | 142745023 | 14274552 |
| 29 NA18853  | [2515685 chr1 | 1  | 145819541 | 145821079 | 1539   | 2   | 0.836255  | 0.107414 | 145819262 | 145819821 | 145820633 | 14582152 |
| 30 NA18853  | [2515685 chr1 | 1  | 145855194 | 145860363 | 5170   | 5   | 0.522198  | 0.066988 | 145848112 | 145858464 | 145860127 | 14586059 |
| 31 NA18853  | [2515685 chr1 | 1  | 145886165 | 145902772 | 16608  | 14  | 0.405891  | 0.039595 | 145885500 | 145886831 | 145902451 | 14590309 |
| 32 NA18853  | [2515685 chr1 | 1  | 145929568 | 145951531 | 21964  | 26  | 0.4427    | 0.028996 | 145929405 | 145929732 | 145951467 | 14595159 |
| 33 NA18853  | [2515685 chr1 | 1  | 158293934 | 158377436 | 83503  | 98  | -0.562596 | 0.014854 | 158293643 | 158294226 | 158377203 | 15837767 |
| 34 NA18853  | [2515685 chr1 | 1  | 193448820 | 193555075 | 106256 | 89  | 0.431299  | 0.015924 | 193448631 | 193449010 | 193554890 | 19355526 |
| 35 NA18853  | [2515685 chr1 | 1  | 193619849 | 193650443 | 30595  | 24  | 0.319864  | 0.028687 | 193619444 | 193620254 | 193650245 | 19365064 |
| 36 NA18853  | [2515685 chr1 | 1  | 204229515 | 204234080 | 4566   | 4   | -0.75877  | 0.07255  | 204228648 | 204230383 | 204233127 | 20423503 |
| 37 NA18853  | [2515685 chr1 | 1  | 218762650 | 218768272 | 5623   | 6   | 0.344164  | 0.06012  | 218762212 | 218763089 | 218767017 | 21876952 |
| 38 NA18853  | [2515685 chr1 | 1  | 226117234 | 226125723 | 8490   | 2   | -0.577245 | 0.112005 | 226114786 | 226119683 | 226122453 | 22612975 |
| 39 NA18853  | [2515685 chr1 | 1  | 234431726 | 234434986 | 3261   | 4   | -0.362315 | 0.070958 | 234431378 | 234432075 | 234434147 | 23443582 |
| 40 NA18853  | [2515685 chr1 | 1  | 236719047 | 236720968 | 1922   | 3   | -0.905655 | 0.088243 | 236718751 | 236719344 | 236720749 | 23672118 |
| 41 NA18853  | [2515685 chr1 | 1  | 243009520 | 243011368 | 1849   | 3   | -0.554567 | 0.083924 | 243008430 | 243010610 | 243011204 | 24301153 |
| 42 NA18853  | [2515685 chr1 | 1  | 244872415 | 244874585 | 2171   | 6   | -0.334779 | 0.063195 | 244872245 | 244872585 | 244874398 | 24487477 |
| 43 NA18853  | [2515685 chr2 | 2  | 296456    | 298925    | 2470   | 8   | -0.9443   | 0.056725 | 296213    | 296699    | 298661    | 299185   |
| 44 NA18853  | [2515685 chr2 | 2  | 388500    | 391649    | 3150   | 7   | -0.576593 | 0.059045 | 387915    | 389086    | 391236    | 392063   |
| 45 NA18853  | [2515685 chr2 | 2  | 34606446  | 34641571  | 35126  | 38  | 0.737968  | 0.025188 | 34601818  | 34609397  | 34641330  | 3464181  |
| 46 NA18853  | [2515685 chr2 | 2  | 35896479  | 35905930  | 9452   | 3   | -0.811959 | 0.084593 | 35879425  | 35899430  | 35902979  | 3590982  |

|             |               |   |           |           |        |     |           |          |           |           |           |           |
|-------------|---------------|---|-----------|-----------|--------|-----|-----------|----------|-----------|-----------|-----------|-----------|
| 47 NA18853  | [2515685 chr2 | 2 | 37869648  | 37911473  | 41826  | 43  | -0.411062 | 0.022088 | 37869077  | 37870220  | 37911214  | 3791173:  |
| 48 NA18853  | [2515685 chr2 | 2 | 41150168  | 41161411  | 11244  | 13  | -0.850765 | 0.040615 | 41149866  | 41150471  | 41160114  | 4116270!  |
| 49 NA18853  | [2515685 chr2 | 2 | 51421537  | 51422882  | 1346   | 2   | 0.550493  | 0.10125  | 51421334  | 51421741  | 51422648  | 5142311!  |
| 50 NA18853  | [2515685 chr2 | 2 | 55822423  | 55850659  | 28237  | 29  | 0.514594  | 0.027593 | 55821905  | 55822941  | 55850414  | 5585090.  |
| 51 NA18853  | [2515685 chr2 | 2 | 56563626  | 56567381  | 3756   | 2   | 3.536512  | 0.205704 | 56556559  | 56566577  | 56567035  | 5656772!  |
| 52 NA18853  | [2515685 chr2 | 2 | 58735266  | 58736833  | 1568   | 2   | -0.561794 | 0.085731 | 58734865  | 58735667  | 58736407  | 5873725!  |
| 53 NA18853  | [2515685 chr2 | 2 | 61675589  | 61676777  | 1189   | 2   | 0.936688  | 0.135196 | 61675200  | 61675979  | 61676468  | 6167708!  |
| 54 NA18853  | [2515685 chr2 | 2 | 73922476  | 73948487  | 26012  | 42  | -0.813313 | 0.014458 | 73922222  | 73922730  | 73948060  | 7394891!  |
| 55 NA18853  | [2515685 chr2 | 2 | 75296507  | 75298934  | 2428   | 2   | 0.913566  | 0.10763  | 75296056  | 75296959  | 75298532  | 7529933!  |
| 56 NA18853  | [2515685 chr2 | 2 | 83700160  | 83702920  | 2761   | 2   | -0.709152 | 0.118556 | 83699507  | 83700814  | 83701859  | 8370398!  |
| 57 NA18853  | [2515685 chr2 | 2 | 94985753  | 94992426  | 6674   | 6   | -0.315066 | 0.058274 | 94984352  | 94987154  | 94989475  | 9499588!  |
| 58 NA18853  | [2515685 chr2 | 2 | 97184386  | 97189733  | 5348   | 2   | -0.789668 | 0.107496 | 97182781  | 97185992  | 97186782  | 9719672!  |
| 59 NA18853  | [2515685 chr2 | 2 | 108313968 | 108314875 | 908    | 2   | 0.657613  | 0.107509 | 108313664 | 108314272 | 108314680 | 10831507! |
| 60 NA18853  | [2515685 chr2 | 2 | 110167854 | 110168359 | 506    | 2   | -0.862031 | 0.111218 | 110167550 | 110168159 | 110168235 | 11016848! |
| 61 NA18853  | [2515685 chr2 | 2 | 110510216 | 110510722 | 507    | 2   | -0.862042 | 0.111218 | 110510092 | 110510341 | 110510418 | 11051102! |
| 62 NA18853  | [2515685 chr2 | 2 | 111696774 | 111699712 | 2939   | 17  | 0.295823  | 0.035187 | 111696413 | 111697136 | 111699396 | 11170002! |
| 63 NA18853  | [2515685 chr2 | 2 | 115108324 | 115118866 | 10543  | 10  | -0.814148 | 0.051198 | 115107995 | 115108654 | 115118291 | 11511944! |
| 64 NA18853  | [2515685 chr2 | 2 | 123193457 | 123198547 | 5091   | 4   | -0.789635 | 0.075707 | 123193121 | 123193793 | 123198337 | 12319875! |
| 65 NA18853  | [2515685 chr2 | 2 | 129229413 | 129230774 | 1362   | 2   | -1.149262 | 0.125815 | 129229234 | 129229593 | 129230356 | 12923119! |
| 66 NA18853  | [2515685 chr2 | 2 | 130410671 | 130412325 | 1655   | 2   | -0.668842 | 0.107244 | 130410236 | 130411106 | 130412086 | 13041256! |
| 67 NA18853  | [2515685 chr2 | 2 | 130420955 | 130425589 | 4635   | 3   | -0.770694 | 0.09851  | 130420630 | 130421281 | 130423487 | 13042769! |
| 68 NA18853  | [2515685 chr2 | 2 | 130449037 | 130450259 | 1223   | 2   | -0.738156 | 0.101412 | 130448725 | 130449350 | 130449916 | 13045060! |
| 69 NA18853  | [2515685 chr2 | 2 | 131950969 | 131953962 | 2994   | 4   | -0.516582 | 0.078646 | 131950064 | 131951874 | 131953571 | 13195435! |
| 70 NA18853  | [2515685 chr2 | 2 | 132846945 | 132873051 | 26107  | 20  | 0.375025  | 0.033502 | 132846760 | 132847131 | 132872791 | 13287331! |
| 71 NA18853  | [2515685 chr2 | 2 | 153495552 | 153499409 | 3858   | 2   | 0.694231  | 0.116908 | 153484545 | 153498503 | 153498846 | 15349997! |
| 72 NA18853  | [2515685 chr2 | 2 | 153622711 | 153625256 | 2546   | 3   | 0.951773  | 0.091745 | 153621175 | 153624247 | 153625088 | 15362542! |
| 73 NA18853  | [2515685 chr2 | 2 | 180237123 | 180248038 | 10916  | 9   | -0.754647 | 0.05064  | 180235687 | 180238560 | 180247508 | 18024856! |
| 74 NA18853  | [2515685 chr2 | 2 | 195804965 | 195809805 | 4841   | 5   | -1.59995  | 0.096295 | 195803577 | 195806354 | 195809355 | 19581025! |
| 75 NA18853  | [2515685 chr2 | 2 | 205170277 | 205174390 | 4114   | 3   | -0.923629 | 0.099735 | 205169161 | 205171394 | 205173803 | 20517497! |
| 76 NA18853  | [2515685 chr2 | 2 | 208176479 | 208184457 | 7979   | 7   | 0.854084  | 0.059315 | 208176093 | 208176865 | 208183930 | 20818498! |
| 77 NA18853  | [2515685 chr2 | 2 | 232512469 | 232537143 | 24675  | 6   | -0.551076 | 0.038249 | 232511142 | 232513796 | 232534243 | 23254004! |
| 78 NA18853  | [2515685 chr2 | 2 | 242664580 | 242668683 | 4104   | 10  | 0.66678   | 0.037653 | 242664284 | 242664877 | 242668532 | 24266885! |
| 79 NA18853  | [2515685 chr3 | 3 | 204650    | 209394    | 4745   | 4   | 0.934887  | 0.073241 | 202918    | 206383    | 209009    | 209773    |
| 80 NA18853  | [2515685 chr3 | 3 | 1757211   | 1765703   | 8493   | 2   | 0.856163  | 0.116777 | 1756096   | 1758327   | 1762058   | 179730!   |
| 81 NA18853  | [2515685 chr3 | 3 | 46770617  | 46824272  | 53656  | 10  | -0.700405 | 0.044491 | 46770172  | 46771063  | 46824049  | 4682449!  |
| 82 NA18853  | [2515685 chr3 | 3 | 46824785  | 46825913  | 1129   | 2   | -0.609431 | 0.120402 | 46824495  | 46825076  | 46825497  | 4682633!  |
| 83 NA18853  | [2515685 chr3 | 3 | 68821474  | 68830847  | 9374   | 17  | 0.696982  | 0.036919 | 68818894  | 68824055  | 68830417  | 6883127!  |
| 84 NA18853  | [2515685 chr3 | 3 | 75433237  | 75437534  | 4298   | 3   | -0.443801 | 0.076147 | 75432910  | 75433565  | 75434675  | 7544039!  |
| 85 NA18853  | [2515685 chr3 | 3 | 76066312  | 76081451  | 15140  | 19  | -0.50021  | 0.033517 | 76065787  | 76066838  | 76081180  | 7608172!  |
| 86 NA18853  | [2515685 chr3 | 3 | 82951524  | 82955577  | 4054   | 7   | -0.891934 | 0.0621   | 82951325  | 82951723  | 82955245  | 8295590!  |
| 87 NA18853  | [2515685 chr3 | 3 | 127155218 | 127158873 | 3656   | 6   | -1.058937 | 0.067344 | 127155047 | 127155390 | 127158237 | 12715950! |
| 88 NA18853  | [2515685 chr3 | 3 | 139287057 | 139289507 | 2451   | 3   | 0.952874  | 0.10222  | 139286041 | 139288073 | 139289200 | 13928981! |
| 89 NA18853  | [2515685 chr3 | 3 | 144701165 | 144703799 | 2635   | 2   | -1.002155 | 0.125038 | 144699852 | 144702479 | 144703331 | 14470426! |
| 90 NA18853  | [2515685 chr3 | 3 | 145763994 | 145774342 | 10349  | 10  | -0.868575 | 0.05248  | 145763667 | 145764322 | 145773831 | 14577485! |
| 91 NA18853  | [2515685 chr3 | 3 | 145803560 | 145806238 | 2679   | 2   | 0.592669  | 0.094857 | 145803138 | 145803982 | 145805964 | 14580651! |
| 92 NA18853  | [2515685 chr3 | 3 | 163994592 | 164106273 | 111682 | 103 | 2.710658  | 0.026213 | 163993392 | 163995793 | 164106029 | 16410651! |
| 93 NA18853  | [2515685 chr3 | 3 | 164106273 | 164108502 | 2230   | 2   | 0.740072  | 0.115622 | 164106029 | 164106517 | 164108018 | 16410898! |
| 94 NA18853  | [2515685 chr3 | 3 | 164200660 | 164205886 | 5227   | 5   | -3.276548 | 0.138766 | 164200187 | 164201133 | 164204674 | 16420709! |
| 95 NA18853  | [2515685 chr3 | 3 | 166745688 | 166769955 | 24268  | 29  | -0.73955  | 0.030066 | 166744697 | 166746680 | 166766310 | 16677933! |
| 96 NA18853  | [2515685 chr3 | 3 | 191219813 | 191223326 | 3514   | 4   | 0.72386   | 0.073816 | 191219291 | 191220336 | 191222918 | 19122373! |
| 97 NA18853  | [2515685 chr3 | 3 | 192547312 | 192554331 | 7020   | 10  | 0.916437  | 0.051619 | 192546950 | 192547674 | 192554127 | 19255453! |
| 98 NA18853  | [2515685 chr3 | 3 | 196679304 | 196713768 | 34465  | 36  | 0.466941  | 0.01889  | 196677636 | 196680972 | 196711768 | 19671576! |
| 99 NA18853  | [2515685 chr3 | 3 | 196879006 | 196938361 | 59356  | 69  | -0.404695 | 0.015039 | 196878963 | 196879049 | 196937706 | 19693901! |
| 100 NA18853 | [2515685 chr3 | 3 | 196942858 | 196966359 | 23502  | 21  | -0.404695 | 0.015039 | 196942569 | 196943147 | 196966111 | 19696660! |
| 101 NA18853 | [2515685 chr3 | 3 | 196991681 | 196993357 | 1677   | 7   | 0.565526  | 0.06041  | 196991423 | 196991939 | 196993124 | 19699359! |



|             |               |   |           |           |        |     |           |          |           |           |           |           |
|-------------|---------------|---|-----------|-----------|--------|-----|-----------|----------|-----------|-----------|-----------|-----------|
| 102 NA18853 | [2515685 chr3 | 3 | 197267244 | 197268267 | 1024   | 2   | -0.518896 | 0.103482 | 197267046 | 197267442 | 197267957 | 19726857  |
| 103 NA18853 | [2515685 chr3 | 3 | 198422794 | 198427408 | 4615   | 2   | 0.839645  | 0.12371  | 198422381 | 198423207 | 198423959 | 19843085  |
| 104 NA18853 | [2515685 chr3 | 3 | 198572377 | 198575179 | 2803   | 2   | -0.484286 | 0.093332 | 198572010 | 198572745 | 198573395 | 19857696  |
| 105 NA18853 | [2515685 chr3 | 3 | 199218619 | 199221999 | 3381   | 12  | -0.285068 | 0.045523 | 199218354 | 199218884 | 199220440 | 19922355  |
| 106 NA18853 | [2515685 chr3 | 3 | 199313925 | 199321063 | 7139   | 15  | 1.033767  | 0.028105 | 199313515 | 199314336 | 199320844 | 19932128  |
| 107 NA18853 | [2515685 chr3 | 3 | 199345966 | 199380053 | 34088  | 50  | 0.272965  | 0.019388 | 199339767 | 199349611 | 199377257 | 19938284  |
| 108 NA18853 | [2515685 chr3 | 3 | 199383694 | 199384627 | 934    | 4   | -0.470648 | 0.079875 | 199383507 | 199383882 | 199384512 | 19938474  |
| 109 NA18853 | [2515685 chr4 | 4 | 8740317   | 8756949   | 16633  | 25  | 0.591925  | 0.019735 | 8740049   | 8740586   | 8756813   | 8757086   |
| 110 NA18853 | [2515685 chr4 | 4 | 8998177   | 9046719   | 48543  | 87  | 0.979945  | 0.010165 | 8850774   | 9001243   | 9046129   | 9047306   |
| 111 NA18853 | [2515685 chr4 | 4 | 9812346   | 9813108   | 763    | 33  | 2.434531  | 0.027362 | 9812284   | 9812408   | 9812952   | 9813266   |
| 112 NA18853 | [2515685 chr4 | 4 | 9887220   | 9911397   | 24178  | 31  | 2.349946  | 0.043586 | 9886886   | 9887555   | 9910388   | 9912407   |
| 113 NA18853 | [2515685 chr4 | 4 | 12044687  | 12062008  | 17322  | 18  | -0.839342 | 0.037986 | 12041581  | 12047753  | 12058942  | 12068800  |
| 114 NA18853 | [2515685 chr4 | 4 | 21045633  | 21053532  | 7900   | 8   | -0.860892 | 0.058001 | 21045231  | 21046035  | 21053115  | 21053950  |
| 115 NA18853 | [2515685 chr4 | 4 | 22340035  | 22343194  | 3160   | 4   | -0.982552 | 0.079039 | 22339660  | 22340410  | 22342440  | 22343946  |
| 116 NA18853 | [2515685 chr4 | 4 | 34602797  | 34650994  | 48198  | 45  | 0.747303  | 0.023954 | 34601994  | 34603600  | 34649535  | 34652456  |
| 117 NA18853 | [2515685 chr4 | 4 | 42543240  | 42546856  | 3617   | 2   | 0.854899  | 0.106124 | 42538590  | 42546306  | 42546636  | 42547071  |
| 118 NA18853 | [2515685 chr4 | 4 | 54332700  | 54338781  | 6082   | 2   | 0.5964    | 0.115814 | 54331085  | 54334316  | 54337034  | 54340521  |
| 119 NA18853 | [2515685 chr4 | 4 | 69202095  | 69321049  | 118955 | 74  | 1.424118  | 0.022082 | 69201955  | 69202236  | 69320887  | 69321212  |
| 120 NA18853 | [2515685 chr4 | 4 | 69321522  | 69365270  | 43749  | 40  | 0.553736  | 0.018553 | 69321212  | 69321833  | 69365129  | 69365417  |
| 121 NA18853 | [2515685 chr4 | 4 | 69671789  | 69717280  | 45492  | 53  | 0.511153  | 0.017049 | 69671604  | 69671975  | 69717139  | 69717427  |
| 122 NA18853 | [2515685 chr4 | 4 | 69997399  | 70016445  | 19047  | 7   | 0.301958  | 0.055631 | 69997260  | 69997538  | 70016192  | 70016696  |
| 123 NA18853 | [2515685 chr4 | 4 | 70299503  | 70418701  | 119199 | 118 | 0.408127  | 0.013957 | 70299268  | 70299739  | 70418467  | 70418931  |
| 124 NA18853 | [2515685 chr4 | 4 | 115534210 | 115541546 | 7337   | 9   | 0.86782   | 0.055338 | 115530015 | 115537276 | 115539984 | 11554310  |
| 125 NA18853 | [2515685 chr4 | 4 | 124835704 | 124837199 | 1496   | 3   | -0.511373 | 0.084776 | 124835418 | 124835991 | 124836924 | 124837476 |
| 126 NA18853 | [2515685 chr4 | 4 | 132848421 | 132851466 | 3046   | 4   | -0.829608 | 0.081684 | 132847980 | 132848862 | 132851018 | 13285191  |
| 127 NA18853 | [2515685 chr4 | 4 | 133536192 | 133540723 | 4532   | 3   | -0.708308 | 0.097368 | 133531398 | 133539258 | 133540462 | 13354098  |
| 128 NA18853 | [2515685 chr4 | 4 | 138537751 | 138549906 | 12156  | 14  | 0.849455  | 0.044255 | 138537443 | 138538059 | 138547414 | 13855239  |
| 129 NA18853 | [2515685 chr4 | 4 | 142588136 | 142590500 | 2365   | 4   | -2.208807 | 0.111186 | 142587774 | 142588498 | 142590303 | 14259069  |
| 130 NA18853 | [2515685 chr4 | 4 | 145240980 | 145245588 | 4609   | 4   | -0.540818 | 0.082661 | 145240473 | 145241488 | 145245192 | 14524598  |
| 131 NA18853 | [2515685 chr4 | 4 | 152236497 | 152243015 | 6519   | 8   | -0.755107 | 0.053555 | 152231776 | 152239563 | 152241354 | 15224467  |
| 132 NA18853 | [2515685 chr4 | 4 | 162237272 | 162242562 | 5291   | 8   | 0.870333  | 0.055407 | 162236487 | 162238058 | 162242381 | 16224274  |
| 133 NA18853 | [2515685 chr4 | 4 | 162806038 | 162809269 | 3232   | 3   | 0.807668  | 0.084832 | 162804872 | 162807204 | 162808734 | 16280980  |
| 134 NA18853 | [2515685 chr4 | 4 | 164311757 | 164315466 | 3710   | 6   | -1.009538 | 0.064687 | 164311127 | 164312388 | 164315100 | 16431583  |
| 135 NA18853 | [2515685 chr4 | 4 | 169184442 | 169368370 | 183929 | 161 | 0.751429  | 0.012313 | 169184090 | 169184794 | 169366713 | 16937002  |
| 136 NA18853 | [2515685 chr4 | 4 | 173363594 | 173367718 | 4125   | 6   | -0.786949 | 0.063192 | 173362583 | 173364606 | 173367283 | 17336815  |
| 137 NA18853 | [2515685 chr4 | 4 | 178750399 | 178761484 | 11086  | 14  | -0.784656 | 0.04143  | 178749967 | 178750832 | 178760588 | 17876238  |
| 138 NA18853 | [2515685 chr4 | 4 | 181510330 | 181513372 | 3043   | 4   | -0.898043 | 0.084615 | 181509772 | 181510889 | 181513067 | 18151367  |
| 139 NA18853 | [2515685 chr4 | 4 | 185533276 | 185544849 | 11574  | 12  | 0.822451  | 0.045966 | 185532696 | 185533857 | 185543276 | 18554642  |
| 140 NA18853 | [2515685 chr4 | 4 | 186816951 | 186819359 | 2409   | 3   | 3.694049  | 0.177646 | 186816420 | 186817483 | 186819049 | 18681967  |
| 141 NA18853 | [2515685 chr4 | 4 | 187728494 | 187732907 | 4414   | 15  | 1.793231  | 0.048745 | 187728193 | 187728795 | 187732541 | 18773327  |
| 142 NA18853 | [2515685 chr4 | 4 | 188255523 | 188269680 | 14158  | 235 | 0.748462  | 0.00893  | 188255215 | 188255831 | 188269403 | 18826995  |
| 143 NA18853 | [2515685 chr4 | 4 | 189799455 | 189807562 | 8108   | 11  | -0.769539 | 0.045594 | 189799180 | 189799730 | 189807064 | 18980806  |
| 144 NA18853 | [2515685 chr4 | 4 | 190528602 | 190533163 | 4562   | 21  | -0.971121 | 0.032656 | 190528058 | 190529146 | 190531664 | 19053466  |
| 145 NA18853 | [2515685 chr4 | 4 | 190845771 | 191059687 | 213917 | 220 | 0.311274  | 0.009739 | 190845056 | 190846486 | 191059242 | 19106013  |
| 146 NA18853 | [2515685 chr5 | 5 | 520743    | 521684    | 942    | 5   | 0.519247  | 0.072783 | 520428    | 521059    | 521427    | 521942    |
| 147 NA18853 | [2515685 chr5 | 5 | 732764    | 901723    | 168960 | 154 | 0.43483   | 0.011111 | 732314    | 733215    | 901319    | 902127    |
| 148 NA18853 | [2515685 chr5 | 5 | 1122995   | 1126517   | 3523   | 38  | 0.400527  | 0.017861 | 1122772   | 1123219   | 1126389   | 1126646   |
| 149 NA18853 | [2515685 chr5 | 5 | 1223248   | 1223930   | 683    | 5   | 0.478623  | 0.058536 | 1223057   | 1223439   | 1223854   | 1224007   |
| 150 NA18853 | [2515685 chr5 | 5 | 12863961  | 12873512  | 9552   | 14  | -0.855243 | 0.04509  | 12863778  | 12864144  | 12873198  | 12873827  |
| 151 NA18853 | [2515685 chr5 | 5 | 19410747  | 19412172  | 1426   | 3   | -2.330514 | 0.136897 | 19410189  | 19411305  | 19411980  | 19412361  |
| 152 NA18853 | [2515685 chr5 | 5 | 26831997  | 26837938  | 5942   | 6   | -1.814908 | 0.097852 | 26829858  | 26834136  | 26837469  | 26838401  |
| 153 NA18853 | [2515685 chr5 | 5 | 34243738  | 34244789  | 1052   | 3   | 0.396405  | 0.064772 | 34243371  | 34244105  | 34244564  | 34245011  |
| 154 NA18853 | [2515685 chr5 | 5 | 61783743  | 61785396  | 1654   | 3   | -0.785552 | 0.085133 | 61783295  | 61784192  | 61784900  | 61785897  |
| 155 NA18853 | [2515685 chr5 | 5 | 68865200  | 68946635  | 81436  | 150 | 0.491489  | 0.011107 | 68864770  | 68865630  | 68946473  | 68946791  |
| 156 NA18853 | [2515685 chr5 | 5 | 69061260  | 69061569  | 310    | 2   | 0.601772  | 0.086775 | 69061152  | 69061368  | 69061456  | 69061686  |

|             |               |   |           |           |        |     |           |          |           |           |           |          |
|-------------|---------------|---|-----------|-----------|--------|-----|-----------|----------|-----------|-----------|-----------|----------|
| 157 NA18853 | [2515685 chr5 | 5 | 69358940  | 69372462  | 13523  | 17  | 0.368549  | 0.029491 | 69358540  | 69359340  | 69371968  | 69372957 |
| 158 NA18853 | [2515685 chr5 | 5 | 69388384  | 69433946  | 45563  | 47  | 0.454078  | 0.016062 | 69386439  | 69390329  | 69433170  | 69434727 |
| 159 NA18853 | [2515685 chr5 | 5 | 69713489  | 69713996  | 508    | 2   | 0.548743  | 0.088977 | 69713460  | 69713518  | 69713687  | 69714301 |
| 160 NA18853 | [2515685 chr5 | 5 | 69741138  | 69803323  | 62186  | 101 | 0.435021  | 0.012849 | 69740930  | 69741346  | 69803293  | 69803335 |
| 161 NA18853 | [2515685 chr5 | 5 | 70234358  | 70249184  | 14827  | 18  | 0.389059  | 0.007637 | 70233958  | 70234758  | 70248356  | 70250017 |
| 162 NA18853 | [2515685 chr5 | 5 | 70263808  | 70426554  | 162747 | 239 | 0.389059  | 0.007637 | 70261863  | 70265753  | 70425419  | 70427681 |
| 163 NA18853 | [2515685 chr5 | 5 | 81459213  | 81466055  | 6843   | 2   | -1.37302  | 0.120141 | 81455614  | 81462405  | 81462863  | 81470281 |
| 164 NA18853 | [2515685 chr5 | 5 | 93928460  | 93933101  | 4642   | 4   | -0.549148 | 0.079807 | 93927706  | 93929215  | 93931984  | 93934211 |
| 165 NA18853 | [2515685 chr5 | 5 | 98692416  | 98694362  | 1947   | 3   | 0.465127  | 0.08197  | 98691745  | 98693087  | 98694014  | 98694717 |
| 166 NA18853 | [2515685 chr5 | 5 | 99409393  | 99419037  | 9645   | 13  | -0.705356 | 0.042559 | 99408997  | 99409789  | 99418328  | 99419741 |
| 167 NA18853 | [2515685 chr5 | 5 | 109794290 | 109802696 | 8407   | 7   | -0.30218  | 0.058094 | 109793976 | 109794605 | 109802508 | 10980288 |
| 168 NA18853 | [2515685 chr5 | 5 | 137835848 | 137844134 | 8287   | 7   | 0.550666  | 0.06055  | 137835611 | 137836085 | 137843310 | 13784495 |
| 169 NA18853 | [2515685 chr5 | 5 | 140203081 | 140218928 | 15848  | 20  | 2.086836  | 0.051102 | 140202344 | 140203819 | 140218508 | 14021934 |
| 170 NA18853 | [2515685 chr5 | 5 | 150183322 | 150204419 | 21098  | 12  | -0.594435 | 0.044754 | 150181427 | 150185218 | 150204151 | 15020468 |
| 171 NA18853 | [2515685 chr5 | 5 | 155509740 | 155524648 | 14909  | 19  | -0.831531 | 0.037045 | 155509177 | 155510304 | 155524224 | 15552507 |
| 172 NA18853 | [2515685 chr5 | 5 | 175392637 | 175393797 | 1161   | 6   | -0.327129 | 0.064671 | 175392088 | 175393187 | 175393522 | 17539407 |
| 173 NA18853 | [2515685 chr6 | 6 | 3163      | 21725     | 18563  | 5   | 0.564288  | 0.062964 | 20118     | 6325      | 21709     | 21741    |
| 174 NA18853 | [2515685 chr6 | 6 | 201823    | 324395    | 122573 | 125 | 0.379177  | 0.012886 | 201415    | 202232    | 323926    | 324865   |
| 175 NA18853 | [2515685 chr6 | 6 | 29804640  | 29877120  | 72481  | 2   | 0.535087  | 0.096214 | 29800552  | 29808139  | 29873621  | 29886501 |
| 176 NA18853 | [2515685 chr6 | 6 | 29958572  | 30011802  | 53231  | 50  | 0.478246  | 0.02167  | 29957670  | 29959474  | 30011083  | 30012527 |
| 177 NA18853 | [2515685 chr6 | 6 | 31439511  | 31442541  | 3031   | 5   | -0.311347 | 0.057714 | 31439144  | 31439878  | 31442341  | 31442747 |
| 178 NA18853 | [2515685 chr6 | 6 | 32561866  | 32586862  | 24997  | 6   | -0.565526 | 0.092696 | 32560230  | 32563503  | 32586127  | 32587597 |
| 179 NA18853 | [2515685 chr6 | 6 | 32591244  | 32592360  | 1117   | 2   | -0.83634  | 0.12107  | 32591086  | 32591403  | 32591896  | 32592827 |
| 180 NA18853 | [2515685 chr6 | 6 | 32605125  | 32617042  | 11918  | 9   | -0.297775 | 0.046996 | 32604923  | 32605328  | 32613543  | 32626577 |
| 181 NA18853 | [2515685 chr6 | 6 | 32631127  | 32632349  | 1223   | 2   | -0.611132 | 0.117159 | 32630911  | 32631343  | 32632089  | 32632611 |
| 182 NA18853 | [2515685 chr6 | 6 | 32653862  | 32655482  | 1621   | 3   | 0.860127  | 0.115473 | 32653679  | 32654046  | 32654980  | 32655987 |
| 183 NA18853 | [2515685 chr6 | 6 | 32666229  | 32667673  | 1445   | 3   | 0.519995  | 0.08157  | 32665899  | 32666560  | 32667507  | 32667831 |
| 184 NA18853 | [2515685 chr6 | 6 | 32697402  | 32705737  | 8336   | 12  | -0.290228 | 0.040201 | 32697012  | 32697793  | 32704019  | 32707451 |
| 185 NA18853 | [2515685 chr6 | 6 | 32712337  | 32744343  | 32007  | 37  | 0.437452  | 0.026243 | 32712193  | 32712482  | 32744136  | 32744551 |
| 186 NA18853 | [2515685 chr6 | 6 | 35862833  | 35874426  | 11594  | 13  | 0.446843  | 0.040194 | 35862530  | 35863136  | 35873957  | 35874891 |
| 187 NA18853 | [2515685 chr6 | 6 | 54036900  | 54042384  | 5485   | 5   | 3.379869  | 0.129234 | 54036573  | 54037227  | 54041771  | 54042991 |
| 188 NA18853 | [2515685 chr6 | 6 | 62338502  | 62343650  | 5149   | 2   | -0.817292 | 0.107617 | 62334618  | 62342001  | 62342340  | 62344496 |
| 189 NA18853 | [2515685 chr6 | 6 | 77495034  | 77513510  | 18477  | 12  | 0.725223  | 0.046701 | 77493568  | 77496500  | 77510011  | 77517697 |
| 190 NA18853 | [2515685 chr6 | 6 | 78934834  | 78953033  | 18200  | 13  | -0.817368 | 0.042201 | 78934474  | 78935195  | 78949534  | 78962007 |
| 191 NA18853 | [2515685 chr6 | 6 | 79023318  | 79093263  | 69946  | 69  | 0.765214  | 0.018685 | 79022028  | 79024609  | 79091909  | 79094611 |
| 192 NA18853 | [2515685 chr6 | 6 | 103844685 | 103852411 | 7727   | 2   | 3.445339  | 0.184286 | 103844347 | 103845023 | 103851178 | 10385364 |
| 193 NA18853 | [2515685 chr6 | 6 | 103855469 | 103871201 | 15733  | 11  | 3.310459  | 0.098073 | 103854996 | 103855942 | 103868241 | 10387416 |
| 194 NA18853 | [2515685 chr6 | 6 | 105765021 | 105766918 | 1898   | 3   | 0.398729  | 0.075335 | 105764784 | 105765259 | 105766428 | 10576740 |
| 195 NA18853 | [2515685 chr6 | 6 | 116061665 | 116062448 | 784    | 2   | -0.530892 | 0.104811 | 116061451 | 116061880 | 116062262 | 11606263 |
| 196 NA18853 | [2515685 chr6 | 6 | 120671191 | 120671916 | 726    | 2   | 1.303734  | 0.116935 | 120670696 | 120671686 | 120671725 | 12067210 |
| 197 NA18853 | [2515685 chr6 | 6 | 132067707 | 132076818 | 9112   | 7   | -0.480302 | 0.045771 | 132048222 | 132071206 | 132076464 | 13207717 |
| 198 NA18853 | [2515685 chr6 | 6 | 133558087 | 133562716 | 4630   | 7   | -0.847957 | 0.060222 | 133557110 | 133559064 | 133562279 | 13356315 |
| 199 NA18853 | [2515685 chr6 | 6 | 162821530 | 162823040 | 1511   | 2   | -0.530319 | 0.098722 | 162821109 | 162821951 | 162822743 | 16282333 |
| 200 NA18853 | [2515685 chr6 | 6 | 168780035 | 168781989 | 1955   | 4   | -0.923569 | 0.075405 | 168779504 | 168780567 | 168781555 | 16878242 |
| 201 NA18853 | [2515685 chr6 | 6 | 170603879 | 170604666 | 788    | 2   | -1.355304 | 0.114968 | 170603541 | 170604217 | 170604339 | 17060499 |
| 202 NA18853 | [2515685 chr6 | 6 | 170692529 | 170694780 | 2252   | 13  | 0.256822  | 0.037793 | 170692183 | 170692876 | 170694493 | 17069506 |
| 203 NA18853 | [2515685 chr7 | 7 | 113212    | 116134    | 2923   | 12  | -0.474989 | 0.046288 | 113146    | 113279    | 115995    | 116275   |
| 204 NA18853 | [2515685 chr7 | 7 | 166530    | 175565    | 9036   | 15  | 0.337878  | 0.038312 | 166251    | 166809    | 175292    | 175838   |
| 205 NA18853 | [2515685 chr7 | 7 | 928371    | 930663    | 2293   | 6   | 0.515639  | 0.060647 | 928117    | 928626    | 930382    | 930945   |
| 206 NA18853 | [2515685 chr7 | 7 | 3384111   | 3392457   | 8347   | 8   | 0.827538  | 0.056685 | 3383451   | 3384772   | 3390107   | 3395611  |
| 207 NA18853 | [2515685 chr7 | 7 | 8951115   | 8952746   | 1632   | 3   | -0.521789 | 0.091754 | 8950898   | 8951332   | 8952537   | 8952951  |
| 208 NA18853 | [2515685 chr7 | 7 | 12297894  | 12298675  | 782    | 5   | 0.426166  | 0.069828 | 12297829  | 12297960  | 12298540  | 12298817 |
| 209 NA18853 | [2515685 chr7 | 7 | 14024131  | 14025556  | 1426   | 5   | 0.389671  | 0.06987  | 14023511  | 14024751  | 14025262  | 14025851 |
| 210 NA18853 | [2515685 chr7 | 7 | 37560465  | 37562561  | 2097   | 2   | -0.849223 | 0.116835 | 37560047  | 37560883  | 37561704  | 37563411 |
| 211 NA18853 | [2515685 chr7 | 7 | 37647977  | 37657849  | 9873   | 2   | -0.561001 | 0.076247 | 37646226  | 37649728  | 37655499  | 37719607 |

|             |               |   |           |           |        |      |           |          |           |           |           |           |
|-------------|---------------|---|-----------|-----------|--------|------|-----------|----------|-----------|-----------|-----------|-----------|
| 212 NA18853 | [2515685 chr7 | 7 | 43774540  | 43856045  | 81506  | 109  | 0.306806  | 0.011433 | 43774344  | 43774737  | 43853730  | 43858361  |
| 213 NA18853 | [2515685 chr7 | 7 | 64028465  | 64045487  | 17023  | 47   | -0.257931 | 0.02007  | 64027806  | 64029125  | 64045069  | 64045901  |
| 214 NA18853 | [2515685 chr7 | 7 | 64464087  | 64481591  | 17505  | 46   | -0.265739 | 0.02046  | 64463669  | 64464506  | 64481417  | 64481761  |
| 215 NA18853 | [2515685 chr7 | 7 | 64538610  | 64556662  | 18053  | 48   | -0.271258 | 0.019706 | 64537873  | 64539348  | 64556244  | 64557081  |
| 216 NA18853 | [2515685 chr7 | 7 | 64711975  | 64714537  | 2563   | 3    | 0.579463  | 0.083288 | 64711556  | 64712394  | 64714365  | 64714701  |
| 217 NA18853 | [2515685 chr7 | 7 | 69869623  | 69871056  | 1434   | 2    | 2.824258  | 0.163846 | 69869269  | 69869978  | 69870420  | 69871691  |
| 218 NA18853 | [2515685 chr7 | 7 | 71931863  | 71938241  | 6379   | 13   | 0.318706  | 0.024894 | 71930941  | 71932785  | 71937888  | 71938591  |
| 219 NA18853 | [2515685 chr7 | 7 | 71959925  | 71966304  | 6380   | 13   | 0.318706  | 0.024894 | 71959003  | 71960847  | 71965950  | 71966651  |
| 220 NA18853 | [2515685 chr7 | 7 | 74145618  | 74151996  | 6379   | 13   | 0.33069   | 0.02551  | 74145264  | 74145972  | 74151075  | 74152911  |
| 221 NA18853 | [2515685 chr7 | 7 | 74559882  | 74566261  | 6380   | 14   | 0.324885  | 0.023952 | 74559528  | 74560236  | 74565340  | 74567181  |
| 222 NA18853 | [2515685 chr7 | 7 | 74587905  | 74594283  | 6379   | 14   | 0.324885  | 0.023952 | 74587551  | 74588259  | 74593362  | 74595201  |
| 223 NA18853 | [2515685 chr7 | 7 | 74615924  | 74622302  | 6379   | 14   | 0.324885  | 0.023952 | 74615570  | 74616278  | 74621383  | 74623221  |
| 224 NA18853 | [2515685 chr7 | 7 | 76173835  | 76175647  | 1813   | 2    | 0.563619  | 0.098227 | 76173564  | 76174106  | 76174852  | 76176441  |
| 225 NA18853 | [2515685 chr7 | 7 | 76293242  | 76299619  | 6378   | 15   | 0.322056  | 0.02453  | 76292309  | 76294176  | 76299263  | 76299971  |
| 226 NA18853 | [2515685 chr7 | 7 | 76423357  | 76434911  | 11555  | 10   | -0.274731 | 0.048165 | 76402143  | 76425707  | 76432910  | 76436911  |
| 227 NA18853 | [2515685 chr7 | 7 | 89455601  | 89456632  | 1032   | 2    | 4.524024  | 0.224929 | 89455373  | 89455830  | 89456225  | 89457031  |
| 228 NA18853 | [2515685 chr7 | 7 | 92971481  | 92976895  | 5415   | 4    | 0.717624  | 0.08442  | 92971060  | 92971903  | 92975569  | 92978221  |
| 229 NA18853 | [2515685 chr7 | 7 | 101706885 | 101925433 | 218549 | 313  | 0.324641  | 0.006304 | 101690888 | 101709235 | 101924670 | 10192619  |
| 230 NA18853 | [2515685 chr7 | 7 | 101944574 | 101955748 | 11175  | 8    | -0.396339 | 0.049742 | 101942563 | 101946585 | 101953398 | 10197676  |
| 231 NA18853 | [2515685 chr7 | 7 | 104058651 | 104070743 | 12093  | 11   | -0.791778 | 0.048384 | 104057855 | 104059447 | 104070406 | 10407108  |
| 232 NA18853 | [2515685 chr7 | 7 | 109034784 | 109048749 | 13966  | 10   | 2.126787  | 0.07027  | 109024063 | 109037134 | 109046953 | 10905054  |
| 233 NA18853 | [2515685 chr7 | 7 | 109776378 | 109782655 | 6278   | 5    | 0.829732  | 0.074299 | 109775821 | 109776936 | 109782301 | 109783011 |
| 234 NA18853 | [2515685 chr7 | 7 | 110614584 | 110616239 | 1656   | 2    | -0.940858 | 0.119062 | 110614192 | 110614976 | 110615617 | 11061686  |
| 235 NA18853 | [2515685 chr7 | 7 | 118747553 | 118757346 | 9794   | 14   | -0.790318 | 0.044643 | 118746869 | 118748237 | 118756302 | 11875839  |
| 236 NA18853 | [2515685 chr7 | 7 | 125639507 | 125644775 | 5269   | 6    | -0.834128 | 0.073471 | 125639054 | 125639961 | 125644046 | 12564550  |
| 237 NA18853 | [2515685 chr7 | 7 | 133241895 | 133257359 | 15465  | 16   | 2.062292  | 0.057636 | 133240782 | 133243008 | 133255009 | 13326093  |
| 238 NA18853 | [2515685 chr7 | 7 | 142784994 | 142795453 | 10460  | 11   | -0.361724 | 0.038316 | 142784455 | 142785534 | 142794993 | 14279591  |
| 239 NA18853 | [2515685 chr7 | 7 | 142882680 | 142893148 | 10469  | 12   | -0.366162 | 0.037277 | 142882220 | 142883140 | 142892611 | 14289368  |
| 240 NA18853 | [2515685 chr7 | 7 | 143315274 | 143319988 | 4715   | 7    | -0.394289 | 0.043956 | 143314920 | 143315629 | 143319604 | 14332037  |
| 241 NA18853 | [2515685 chr7 | 7 | 143320629 | 143511719 | 191091 | 363  | -1.110857 | 0.008174 | 143320373 | 143320886 | 143511270 | 14351216  |
| 242 NA18853 | [2515685 chr7 | 7 | 156939035 | 156942423 | 3389   | 5    | 0.356669  | 0.056202 | 156938932 | 156939138 | 156941474 | 15694337  |
| 243 NA18853 | [2515685 chr7 | 7 | 156976112 | 156978464 | 2353   | 2    | 0.504262  | 0.096108 | 156975812 | 156976413 | 156977896 | 15697903  |
| 244 NA18853 | [2515685 chr7 | 7 | 158207288 | 158209880 | 2593   | 2    | 0.728257  | 0.113334 | 158206344 | 158208233 | 158209333 | 15821042  |
| 245 NA18853 | [2515685 chr7 | 7 | 158617060 | 158624378 | 7319   | 6    | 0.834763  | 0.066773 | 158616763 | 158617357 | 158622028 | 15862672  |
| 246 NA18853 | [2515685 chr8 | 8 | 1328256   | 1343509   | 15254  | 45   | -0.274641 | 0.018752 | 1327688   | 1328824   | 1342795   | 1344224   |
| 247 NA18853 | [2515685 chr8 | 8 | 2117168   | 2122807   | 5640   | 8    | -0.743521 | 0.054207 | 2116563   | 2117773   | 2122309   | 2123301   |
| 248 NA18853 | [2515685 chr8 | 8 | 2238735   | 2253792   | 15058  | 10   | -0.745665 | 0.05098  | 2233839   | 2241488   | 2251039   | 2257521   |
| 249 NA18853 | [2515685 chr8 | 8 | 3885315   | 3887416   | 2102   | 2    | 0.533741  | 0.103479 | 3885089   | 3885542   | 3886275   | 3888551   |
| 250 NA18853 | [2515685 chr8 | 8 | 4110204   | 4112526   | 2323   | 2    | 2.998924  | 0.206628 | 4109692   | 4110717   | 4112031   | 4113021   |
| 251 NA18853 | [2515685 chr8 | 8 | 5582875   | 5594011   | 11137  | 9    | 0.729538  | 0.047945 | 5582615   | 5583135   | 5592820   | 5595201   |
| 252 NA18853 | [2515685 chr8 | 8 | 5863204   | 5865192   | 1989   | 2    | 0.797447  | 0.108828 | 5862948   | 5863461   | 5864505   | 5865871   |
| 253 NA18853 | [2515685 chr8 | 8 | 5951254   | 5993684   | 42431  | 3    | 0.426516  | 0.072414 | 5949893   | 5952616   | 5990931   | 6003721   |
| 254 NA18853 | [2515685 chr8 | 8 | 7098713   | 7197230   | 98518  | 305  | 0.275943  | 0.002925 | 7098285   | 7099142   | 7197173   | 7197281   |
| 255 NA18853 | [2515685 chr8 | 8 | 7215164   | 7928723   | 713560 | 1328 | 0.275943  | 0.002925 | 7213320   | 7217008   | 7928292   | 7929151   |
| 256 NA18853 | [2515685 chr8 | 8 | 12023134  | 12035286  | 12153  | 33   | 0.957434  | 0.027422 | 12022997  | 12023272  | 12034973  | 12035591  |
| 257 NA18853 | [2515685 chr8 | 8 | 12064826  | 12072888  | 8063   | 27   | 0.335263  | 0.022733 | 12064663  | 12064989  | 12072625  | 12073151  |
| 258 NA18853 | [2515685 chr8 | 8 | 12276602  | 12284041  | 7440   | 14   | 0.903011  | 0.038423 | 12276206  | 12276998  | 12283622  | 12284461  |
| 259 NA18853 | [2515685 chr8 | 8 | 12314107  | 12320979  | 6873   | 20   | 0.323684  | 0.025691 | 12313944  | 12314270  | 12320895  | 12321061  |
| 260 NA18853 | [2515685 chr8 | 8 | 13659264  | 13695343  | 36080  | 30   | -0.794568 | 0.029633 | 13658432  | 13660096  | 13694817  | 13695861  |
| 261 NA18853 | [2515685 chr8 | 8 | 16245461  | 16251509  | 6049   | 6    | -0.793217 | 0.068103 | 16245129  | 16245794  | 16250812  | 16252201  |
| 262 NA18853 | [2515685 chr8 | 8 | 17480685  | 17490010  | 9326   | 7    | -0.727514 | 0.061108 | 17480098  | 17481273  | 17488823  | 17491191  |
| 263 NA18853 | [2515685 chr8 | 8 | 18900549  | 18901909  | 1361   | 2    | -0.522639 | 0.096766 | 18900138  | 18900960  | 18901577  | 18902241  |
| 264 NA18853 | [2515685 chr8 | 8 | 21212349  | 21215998  | 3650   | 4    | 0.518202  | 0.097271 | 21212110  | 21212588  | 21215588  | 21216401  |
| 265 NA18853 | [2515685 chr8 | 8 | 32799786  | 32810890  | 11105  | 12   | 2.153613  | 0.070111 | 32799314  | 32800259  | 32810654  | 32811121  |
| 266 NA18853 | [2515685 chr8 | 8 | 54001807  | 54002677  | 871    | 2    | -0.925448 | 0.117148 | 54001673  | 54001942  | 54002470  | 54002881  |

|             |                |    |           |           |        |      |           |          |           |           |           |           |
|-------------|----------------|----|-----------|-----------|--------|------|-----------|----------|-----------|-----------|-----------|-----------|
| 267 NA18853 | [2515685 chr8  | 8  | 58278355  | 58289214  | 10860  | 9    | 1.256893  | 0.044268 | 58277116  | 58279595  | 58288084  | 58290341  |
| 268 NA18853 | [2515685 chr8  | 8  | 58290538  | 58296106  | 5569   | 7    | 0.500687  | 0.059584 | 58290345  | 58290731  | 58295669  | 58296544  |
| 269 NA18853 | [2515685 chr8  | 8  | 85423649  | 85431920  | 8272   | 7    | 0.910435  | 0.058543 | 85423043  | 85424256  | 85431347  | 85432493  |
| 270 NA18853 | [2515685 chr8  | 8  | 86742169  | 86910255  | 168087 | 98   | 0.449846  | 0.010066 | 86741757  | 86742581  | 86910002  | 86910503  |
| 271 NA18853 | [2515685 chr8  | 8  | 137764285 | 137777270 | 12986  | 13   | -0.948309 | 0.044607 | 137763097 | 137765474 | 137775157 | 13778225  |
| 272 NA18853 | [2515685 chr9  | 9  | 28836246  | 28838385  | 2140   | 2    | -0.840042 | 0.102623 | 28835879  | 28836613  | 28837661  | 28839111  |
| 273 NA18853 | [2515685 chr9  | 9  | 33646675  | 33648954  | 2280   | 3    | -0.489618 | 0.087523 | 33646355  | 33646996  | 33648420  | 33649483  |
| 274 NA18853 | [2515685 chr9  | 9  | 33688323  | 33689560  | 1238   | 2    | -1.857218 | 0.154303 | 33687588  | 33689059  | 33689374  | 33689747  |
| 275 NA18853 | [2515685 chr9  | 9  | 38856017  | 38864486  | 8470   | 16   | -0.262168 | 0.035089 | 38849975  | 38858379  | 38864433  | 38864533  |
| 276 NA18853 | [2515685 chr9  | 9  | 39025016  | 39027704  | 2689   | 2    | 0.573909  | 0.097921 | 39023735  | 39026298  | 39027196  | 39028213  |
| 277 NA18853 | [2515685 chr9  | 9  | 39818431  | 39823450  | 5020   | 10   | 0.254171  | 0.04266  | 39818000  | 39818862  | 39823302  | 39823593  |
| 278 NA18853 | [2515685 chr9  | 9  | 40260363  | 40263214  | 2852   | 9    | -0.4196   | 0.050678 | 40260111  | 40260616  | 40263010  | 40263411  |
| 279 NA18853 | [2515685 chr9  | 9  | 40514289  | 40514840  | 552    | 2    | 0.841419  | 0.121321 | 40514235  | 40514343  | 40514775  | 40514901  |
| 280 NA18853 | [2515685 chr9  | 9  | 40916968  | 40927141  | 10174  | 13   | 0.263453  | 0.030486 | 40915310  | 40918627  | 40926009  | 40928273  |
| 281 NA18853 | [2515685 chr9  | 9  | 41234952  | 41243367  | 8416   | 13   | -0.305232 | 0.039686 | 41234900  | 41235005  | 41241005  | 41249461  |
| 282 NA18853 | [2515685 chr9  | 9  | 41641446  | 41646461  | 5016   | 9    | 0.258855  | 0.044277 | 41641298  | 41641595  | 41646031  | 41646893  |
| 283 NA18853 | [2515685 chr9  | 9  | 42074739  | 42079321  | 4583   | 9    | 0.304617  | 0.035157 | 42074446  | 42075033  | 42078891  | 42079757  |
| 284 NA18853 | [2515685 chr9  | 9  | 42752844  | 42754727  | 1884   | 2    | 0.451052  | 0.072143 | 42751520  | 42754168  | 42754385  | 42755071  |
| 285 NA18853 | [2515685 chr9  | 9  | 42754727  | 42756705  | 1979   | 3    | -0.328253 | 0.061061 | 42754385  | 42755070  | 42755767  | 42757644  |
| 286 NA18853 | [2515685 chr9  | 9  | 42873520  | 42875403  | 1884   | 2    | 0.451057  | 0.072143 | 42872196  | 42874844  | 42875061  | 42875741  |
| 287 NA18853 | [2515685 chr9  | 9  | 42875403  | 42877381  | 1979   | 3    | -0.328253 | 0.061061 | 42875061  | 42875746  | 42876443  | 42878321  |
| 288 NA18853 | [2515685 chr9  | 9  | 43065211  | 43066832  | 1622   | 2    | -0.975269 | 0.104195 | 43064261  | 43066162  | 43066646  | 43067011  |
| 289 NA18853 | [2515685 chr9  | 9  | 43182772  | 43195894  | 13123  | 25   | -0.364264 | 0.030125 | 43179223  | 43185134  | 43195641  | 43196147  |
| 290 NA18853 | [2515685 chr9  | 9  | 43406103  | 43407037  | 935    | 2    | 0.609316  | 0.115326 | 43406061  | 43406145  | 43406642  | 43407433  |
| 291 NA18853 | [2515685 chr9  | 9  | 43808781  | 43812530  | 3750   | 5    | 0.456523  | 0.068333 | 43808388  | 43809175  | 43812324  | 43812731  |
| 292 NA18853 | [2515685 chr9  | 9  | 44319140  | 44340447  | 21308  | 24   | 0.266231  | 0.029601 | 44318931  | 44319349  | 44340170  | 44340723  |
| 293 NA18853 | [2515685 chr9  | 9  | 45194089  | 45400622  | 206534 | 134  | 0.252961  | 0.012177 | 45193819  | 45194360  | 45400280  | 45400963  |
| 294 NA18853 | [2515685 chr9  | 9  | 45441271  | 45462417  | 21147  | 15   | 0.274239  | 0.037169 | 45440324  | 45442218  | 45461850  | 45462983  |
| 295 NA18853 | [2515685 chr9  | 9  | 66047392  | 66055802  | 8411   | 14   | -0.294953 | 0.039539 | 66047340  | 66047445  | 66053440  | 66061903  |
| 296 NA18853 | [2515685 chr9  | 9  | 66619289  | 66680163  | 60875  | 98   | 0.258308  | 0.014333 | 66619107  | 66619472  | 66680011  | 66680311  |
| 297 NA18853 | [2515685 chr9  | 9  | 66818595  | 66838743  | 20149  | 25   | 0.289975  | 0.022759 | 66818349  | 66818841  | 66837445  | 66840043  |
| 298 NA18853 | [2515685 chr9  | 9  | 71486001  | 71489863  | 3863   | 2    | -0.899861 | 0.115392 | 71483392  | 71488363  | 71489255  | 71490473  |
| 299 NA18853 | [2515685 chr9  | 9  | 80878260  | 80879919  | 1660   | 2    | 0.46796   | 0.092029 | 80877780  | 80878740  | 80879539  | 80880293  |
| 300 NA18853 | [2515685 chr9  | 9  | 112590519 | 112592932 | 2414   | 2    | 0.698301  | 0.109798 | 11259954  | 112591085 | 112591990 | 112593873 |
| 301 NA18853 | [2515685 chr9  | 9  | 112902065 | 112932269 | 30205  | 42   | 0.596163  | 0.015345 | 112901557 | 112902574 | 112931621 | 112932913 |
| 302 NA18853 | [2515685 chr9  | 9  | 138188003 | 138189923 | 1921   | 45   | 0.287194  | 0.021837 | 138187808 | 138188198 | 138189840 | 138190000 |
| 303 NA18853 | [2515685 chr9  | 9  | 138311531 | 138394159 | 82629  | 82   | 0.271389  | 0.015303 | 138311291 | 138311772 | 138391797 | 13839718  |
| 304 NA18853 | [2515685 chr9  | 9  | 138398032 | 138399638 | 1607   | 7    | -0.493323 | 0.061016 | 138397941 | 138398123 | 138399572 | 13839970  |
| 305 NA18853 | [2515685 chr10 | 10 | 170571    | 172369    | 1799   | 2    | 0.542777  | 0.093348 | 170341    | 170801    | 171237    | 173501    |
| 306 NA18853 | [2515685 chr10 | 10 | 4279984   | 4282023   | 2040   | 2    | 1.89355   | 0.151172 | 4279599   | 4280370   | 4281521   | 4282523   |
| 307 NA18853 | [2515685 chr10 | 10 | 6693908   | 6703893   | 9986   | 8    | 0.746567  | 0.056304 | 6692231   | 6695585   | 6703779   | 6704008   |
| 308 NA18853 | [2515685 chr10 | 10 | 37491079  | 37527174  | 36096  | 55   | -0.369663 | 0.015316 | 37490689  | 37491470  | 37526783  | 37527561  |
| 309 NA18853 | [2515685 chr10 | 10 | 46113643  | 46132737  | 19095  | 34   | -0.303828 | 0.018385 | 46113432  | 46113854  | 46132697  | 46132771  |
| 310 NA18853 | [2515685 chr10 | 10 | 46185144  | 46221325  | 36182  | 93   | -0.306102 | 0.003212 | 46184361  | 46185928  | 46221069  | 4622158   |
| 311 NA18853 | [2515685 chr10 | 10 | 46228317  | 47173707  | 945391 | 1348 | -0.306102 | 0.003212 | 46228145  | 46228490  | 47173507  | 47173903  |
| 312 NA18853 | [2515685 chr10 | 10 | 47219668  | 47220637  | 970    | 6    | -0.464666 | 0.061407 | 47219445  | 47219892  | 47220533  | 4722074   |
| 313 NA18853 | [2515685 chr10 | 10 | 47229756  | 47231502  | 1747   | 6    | -0.42622  | 0.048736 | 47229626  | 47229886  | 47231201  | 47231803  |
| 314 NA18853 | [2515685 chr10 | 10 | 47525808  | 47527378  | 1571   | 3    | -0.534764 | 0.099689 | 47525603  | 47526014  | 47527224  | 47527533  |
| 315 NA18853 | [2515685 chr10 | 10 | 47723238  | 47760244  | 37007  | 115  | -0.301393 | 0.008022 | 47575187  | 47725982  | 47760072  | 47760413  |
| 316 NA18853 | [2515685 chr10 | 10 | 47767237  | 47803532  | 36296  | 100  | -0.301393 | 0.008022 | 47766982  | 47767493  | 47802824  | 4780424   |
| 317 NA18853 | [2515685 chr10 | 10 | 47886941  | 47889830  | 2890   | 11   | -0.386804 | 0.036192 | 47886839  | 47887044  | 47889529  | 47890133  |
| 318 NA18853 | [2515685 chr10 | 10 | 48210302  | 48214641  | 4340   | 4    | -0.742225 | 0.072681 | 48208532  | 48212072  | 48214046  | 48215231  |
| 319 NA18853 | [2515685 chr10 | 10 | 48499011  | 48517721  | 18711  | 30   | -0.309722 | 0.019723 | 48498672  | 48499351  | 48517549  | 48517893  |
| 320 NA18853 | [2515685 chr10 | 10 | 48557501  | 48561210  | 3710   | 16   | -0.334522 | 0.030322 | 48557151  | 48557851  | 48561141  | 48561281  |
| 321 NA18853 | [2515685 chr10 | 10 | 48574881  | 48601271  | 26391  | 58   | -0.325609 | 0.015462 | 48574098  | 48575665  | 48601121  | 48601423  |

|             |                |    |           |           |        |     |           |          |           |           |           |          |
|-------------|----------------|----|-----------|-----------|--------|-----|-----------|----------|-----------|-----------|-----------|----------|
| 322 NA18853 | [2515685 chr10 | 10 | 48631676  | 48718241  | 86566  | 142 | -0.358163 | 0.008754 | 48631403  | 48631949  | 48715497  | 4886556  |
| 323 NA18853 | [2515685 chr10 | 10 | 51119630  | 51132551  | 12922  | 21  | -0.31119  | 0.025115 | 51119365  | 51119895  | 51132382  | 5113272  |
| 324 NA18853 | [2515685 chr10 | 10 | 51598792  | 51608038  | 9247   | 6   | 0.335776  | 0.059501 | 51597921  | 51599663  | 51607797  | 5160827  |
| 325 NA18853 | [2515685 chr10 | 10 | 56117212  | 56139275  | 22064  | 20  | -0.947078 | 0.034978 | 56115764  | 56118661  | 56138931  | 5613961  |
| 326 NA18853 | [2515685 chr10 | 10 | 58879708  | 58882015  | 2308   | 5   | -0.975101 | 0.079022 | 58879568  | 58879849  | 58881863  | 5888216  |
| 327 NA18853 | [2515685 chr10 | 10 | 70282947  | 70293330  | 10384  | 10  | -0.824391 | 0.045931 | 70282579  | 70283316  | 70290586  | 7029856  |
| 328 NA18853 | [2515685 chr10 | 10 | 81211905  | 81212746  | 842    | 2   | 0.422461  | 0.079189 | 81211535  | 81212275  | 81212350  | 8121314  |
| 329 NA18853 | [2515685 chr10 | 10 | 81532073  | 81532900  | 828    | 2   | 0.422461  | 0.079189 | 81531733  | 81532413  | 81532488  | 8153331  |
| 330 NA18853 | [2515685 chr10 | 10 | 88866216  | 88963891  | 97676  | 108 | -0.336446 | 0.012347 | 88865617  | 88866816  | 88963564  | 8896421  |
| 331 NA18853 | [2515685 chr10 | 10 | 89054024  | 89054921  | 898    | 2   | 0.422461  | 0.079189 | 89053660  | 89054389  | 89054464  | 8905537  |
| 332 NA18853 | [2515685 chr10 | 10 | 89182508  | 89183379  | 872    | 2   | 0.422461  | 0.079189 | 89182051  | 89182965  | 89183040  | 8918371  |
| 333 NA18853 | [2515685 chr10 | 10 | 122760140 | 122777315 | 17176  | 11  | -0.747802 | 0.047871 | 122759805 | 122760476 | 122776760 | 12277787 |
| 334 NA18853 | [2515685 chr10 | 10 | 124336365 | 124341749 | 5385   | 6   | 0.497412  | 0.064756 | 124335581 | 124337149 | 124341238 | 12434226 |
| 335 NA18853 | [2515685 chr10 | 10 | 124350353 | 124366738 | 16386  | 21  | -0.397415 | 0.020888 | 124350031 | 124350675 | 124366300 | 12436717 |
| 336 NA18853 | [2515685 chr10 | 10 | 127575549 | 127578663 | 3115   | 3   | -0.44328  | 0.077218 | 127575106 | 127575992 | 127578267 | 12757905 |
| 337 NA18853 | [2515685 chr10 | 10 | 127762846 | 127766094 | 3249   | 4   | 0.376339  | 0.07244  | 127762583 | 127763110 | 127765657 | 12776653 |
| 338 NA18853 | [2515685 chr10 | 10 | 129048824 | 129051127 | 2304   | 2   | -0.738103 | 0.142074 | 129048372 | 129049276 | 129050257 | 12905199 |
| 339 NA18853 | [2515685 chr10 | 10 | 134168766 | 134170259 | 1494   | 17  | -1.341113 | 0.043777 | 134168524 | 134169008 | 134170097 | 13417042 |
| 340 NA18853 | [2515685 chr10 | 10 | 134813662 | 134816190 | 2529   | 3   | -0.441871 | 0.07566  | 134813181 | 134814143 | 134815683 | 13481669 |
| 341 NA18853 | [2515685 chr10 | 10 | 134924761 | 134926337 | 1577   | 16  | -0.306777 | 0.040827 | 134924706 | 134924816 | 134926184 | 13492649 |
| 342 NA18853 | [2515685 chr10 | 10 | 135138637 | 135270422 | 131786 | 118 | 0.516375  | 0.011623 | 135136044 | 135141231 | 135270010 | 13527083 |
| 343 NA18853 | [2515685 chr11 | 11 | 2840933   | 2842410   | 1478   | 2   | 0.531113  | 0.098304 | 2840656   | 2841211   | 2841856   | 284296   |
| 344 NA18853 | [2515685 chr11 | 11 | 2999680   | 3137581   | 137902 | 2   | -0.857891 | 0.089367 | 2949255   | 3002762   | 3134499   | 317326   |
| 345 NA18853 | [2515685 chr11 | 11 | 3628748   | 3632795   | 4048   | 6   | -2.254968 | 0.086214 | 3625722   | 3631775   | 3632594   | 363299   |
| 346 NA18853 | [2515685 chr11 | 11 | 5717038   | 5718491   | 1454   | 2   | 3.747862  | 0.211628 | 5716660   | 5717416   | 5718038   | 571894   |
| 347 NA18853 | [2515685 chr11 | 11 | 5741269   | 5765993   | 24725  | 31  | 1.604858  | 0.037824 | 5741059   | 5741480   | 5765632   | 576635   |
| 348 NA18853 | [2515685 chr11 | 11 | 5830457   | 5843034   | 12578  | 12  | -0.738199 | 0.046036 | 5828206   | 5832709   | 5839952   | 584917   |
| 349 NA18853 | [2515685 chr11 | 11 | 11831868  | 11833089  | 1222   | 2   | 0.955973  | 0.117125 | 11831412  | 11832324  | 11832853  | 11833321 |
| 350 NA18853 | [2515685 chr11 | 11 | 18906905  | 18923021  | 16117  | 29  | 0.448869  | 0.027062 | 18906533  | 18907278  | 18919939  | 1892845  |
| 351 NA18853 | [2515685 chr11 | 11 | 28965605  | 28969186  | 3582   | 5   | 3.192575  | 0.145263 | 28965284  | 28965927  | 28968702  | 2896967  |
| 352 NA18853 | [2515685 chr11 | 11 | 48284073  | 48284771  | 699    | 2   | 0.876307  | 0.104111 | 48283862  | 48284285  | 48284572  | 4828497  |
| 353 NA18853 | [2515685 chr11 | 11 | 48997072  | 49001951  | 4880   | 10  | 0.255136  | 0.046849 | 48996760  | 48997384  | 49001459  | 4900244  |
| 354 NA18853 | [2515685 chr11 | 11 | 49072856  | 49075952  | 3097   | 6   | 0.305257  | 0.059454 | 49072572  | 49073140  | 49075650  | 4907625  |
| 355 NA18853 | [2515685 chr11 | 11 | 49665830  | 49715830  | 50001  | 36  | 0.483859  | 0.024773 | 49665251  | 49666410  | 49712748  | 4972198  |
| 356 NA18853 | [2515685 chr11 | 11 | 73815147  | 73817979  | 2833   | 2   | -0.55469  | 0.108643 | 73812981  | 73817313  | 73817746  | 7381821  |
| 357 NA18853 | [2515685 chr11 | 11 | 81179059  | 81203719  | 24661  | 18  | -0.750028 | 0.037642 | 81178883  | 81179236  | 81203484  | 8120395  |
| 358 NA18853 | [2515685 chr11 | 11 | 88266938  | 88303948  | 37011  | 40  | 0.262878  | 0.023472 | 88266424  | 88267453  | 88303762  | 8830413  |
| 359 NA18853 | [2515685 chr11 | 11 | 89184898  | 89189792  | 4895   | 5   | 0.542304  | 0.076812 | 89184243  | 89185554  | 89189177  | 8919040  |
| 360 NA18853 | [2515685 chr11 | 11 | 106744846 | 106751053 | 6208   | 9   | -0.85599  | 0.057157 | 106744561 | 106745131 | 106747971 | 10675483 |
| 361 NA18853 | [2515685 chr11 | 11 | 134107699 | 134112290 | 4592   | 5   | 0.682585  | 0.068814 | 134106591 | 134108808 | 134111845 | 13411273 |
| 362 NA18853 | [2515685 chr12 | 12 | 736840    | 744802    | 7963   | 9   | 0.866924  | 0.050953 | 736616    | 737064    | 744211    | 74539    |
| 363 NA18853 | [2515685 chr12 | 12 | 2112534   | 2127044   | 14511  | 15  | 0.645903  | 0.038665 | 2109107   | 2115961   | 2126809   | 212727   |
| 364 NA18853 | [2515685 chr12 | 12 | 6113530   | 6117052   | 3523   | 3   | 0.649734  | 0.095897 | 6111640   | 6115421   | 6116289   | 611781   |
| 365 NA18853 | [2515685 chr12 | 12 | 8262986   | 8269259   | 6274   | 17  | 0.340705  | 0.028671 | 8262374   | 8263598   | 8268864   | 826965   |
| 366 NA18853 | [2515685 chr12 | 12 | 9439347   | 9445623   | 6277   | 10  | 0.473856  | 0.042876 | 9439120   | 9439574   | 9445247   | 944600   |
| 367 NA18853 | [2515685 chr12 | 12 | 9524239   | 9624971   | 100733 | 108 | 1.013685  | 0.016007 | 9523968   | 9524510   | 9623223   | 962672   |
| 368 NA18853 | [2515685 chr12 | 12 | 11080832  | 11083764  | 2933   | 5   | -0.466164 | 0.063089 | 11080446  | 11081219  | 11083559  | 1108396  |
| 369 NA18853 | [2515685 chr12 | 12 | 11109926  | 11112902  | 2977   | 5   | -0.648551 | 0.067998 | 11109784  | 11110068  | 11112601  | 1111320  |
| 370 NA18853 | [2515685 chr12 | 12 | 11172445  | 11177210  | 4766   | 3   | -0.599779 | 0.094545 | 11172159  | 11172731  | 11176908  | 1117751  |
| 371 NA18853 | [2515685 chr12 | 12 | 11398049  | 11459788  | 61740  | 65  | -0.255057 | 0.018055 | 11397507  | 11398591  | 11459586  | 1145999  |
| 372 NA18853 | [2515685 chr12 | 12 | 22463578  | 22477653  | 14076  | 7   | 0.836452  | 0.049461 | 22463304  | 22463852  | 22474599  | 2248070  |
| 373 NA18853 | [2515685 chr12 | 12 | 31155331  | 31244780  | 89450  | 84  | 0.707315  | 0.016663 | 31155092  | 31155571  | 31244217  | 3124534  |
| 374 NA18853 | [2515685 chr12 | 12 | 69156922  | 69167886  | 10965  | 11  | 0.695307  | 0.047167 | 69138649  | 69160412  | 69164396  | 6921501  |
| 375 NA18853 | [2515685 chr12 | 12 | 70475445  | 70476812  | 1368   | 2   | -0.80807  | 0.112412 | 70475180  | 70475711  | 70476524  | 7047710  |
| 376 NA18853 | [2515685 chr12 | 12 | 78656134  | 78665261  | 9128   | 9   | -0.492188 | 0.050116 | 78654687  | 78657582  | 78664736  | 7866578  |

|             |                |    |           |           |        |      |           |          |           |           |           |          |
|-------------|----------------|----|-----------|-----------|--------|------|-----------|----------|-----------|-----------|-----------|----------|
| 377 NA18853 | [2515685 chr12 | 12 | 87338123  | 87347005  | 8883   | 4    | -0.404485 | 0.078978 | 87329173  | 87341613  | 87346311  | 87347701 |
| 378 NA18853 | [2515685 chr12 | 12 | 128601598 | 128602937 | 1340   | 2    | -0.747904 | 0.10313  | 128601341 | 128601856 | 128602454 | 12860342 |
| 379 NA18853 | [2515685 chr12 | 12 | 130315291 | 130316795 | 1505   | 12   | 0.304375  | 0.037983 | 130315089 | 130315493 | 130316384 | 13031720 |
| 380 NA18853 | [2515685 chr12 | 12 | 130722348 | 130723571 | 1224   | 2    | -0.929196 | 0.112261 | 130722182 | 130722514 | 130723200 | 13072394 |
| 381 NA18853 | [2515685 chr13 | 13 | 25947233  | 25950398  | 3166   | 3    | 3.200293  | 0.149834 | 25946194  | 25948272  | 25949415  | 2595138  |
| 382 NA18853 | [2515685 chr13 | 13 | 31430484  | 31437209  | 6726   | 7    | -0.789127 | 0.06143  | 31430130  | 31430838  | 31436488  | 3143793  |
| 383 NA18853 | [2515685 chr13 | 13 | 33852305  | 33853351  | 1047   | 2    | -0.555027 | 0.094074 | 33852033  | 33852578  | 33853063  | 3385363  |
| 384 NA18853 | [2515685 chr13 | 13 | 56611711  | 56645734  | 34024  | 47   | 0.55833   | 0.013074 | 56610946  | 56612477  | 56645321  | 5664614  |
| 385 NA18853 | [2515685 chr13 | 13 | 56653890  | 56686136  | 32247  | 30   | -0.871852 | 0.029599 | 56650401  | 56657380  | 56685381  | 5668689  |
| 386 NA18853 | [2515685 chr13 | 13 | 63190074  | 63192391  | 2318   | 4    | -0.416435 | 0.081196 | 63189262  | 63190887  | 63192072  | 6319271  |
| 387 NA18853 | [2515685 chr13 | 13 | 63238182  | 63240498  | 2317   | 4    | -0.416439 | 0.081197 | 63237863  | 63238501  | 63239686  | 6324131  |
| 388 NA18853 | [2515685 chr13 | 13 | 69633905  | 69673289  | 39385  | 42   | 0.80389   | 0.02407  | 69633412  | 69634399  | 69672985  | 6967359  |
| 389 NA18853 | [2515685 chr13 | 13 | 75507216  | 75509228  | 2013   | 2    | -0.897315 | 0.113727 | 75506694  | 75507738  | 75508559  | 7550989  |
| 390 NA18853 | [2515685 chr13 | 13 | 109215660 | 109217089 | 1430   | 5    | 0.379145  | 0.059999 | 109215230 | 109216090 | 109216885 | 10921729 |
| 391 NA18853 | [2515685 chr13 | 13 | 113079647 | 113086818 | 7172   | 3    | 0.526698  | 0.0835   | 113078890 | 113080404 | 113082138 | 11309434 |
| 392 NA18853 | [2515685 chr14 | 14 | 18439491  | 19171746  | 732256 | 1240 | -0.250957 | 0.003354 | 18437497  | 18441485  | 19169589  | 1917390  |
| 393 NA18853 | [2515685 chr14 | 14 | 19177839  | 19494842  | 317004 | 348  | -0.250957 | 0.003354 | 19177094  | 19178584  | 19494444  | 1949524  |
| 394 NA18853 | [2515685 chr14 | 14 | 19589170  | 19611187  | 22018  | 18   | 0.480587  | 0.035431 | 19588055  | 19590285  | 19610807  | 1961156  |
| 395 NA18853 | [2515685 chr14 | 14 | 19619356  | 19625484  | 6129   | 3    | 3.785255  | 0.17597  | 19612261  | 19624114  | 19625018  | 1962595  |
| 396 NA18853 | [2515685 chr14 | 14 | 32022775  | 32026140  | 3366   | 2    | -1.184656 | 0.126207 | 32022274  | 32023276  | 32023749  | 3202853  |
| 397 NA18853 | [2515685 chr14 | 14 | 42059344  | 42063443  | 4100   | 2    | 0.667081  | 0.112585 | 42056485  | 42062203  | 42062601  | 4206428  |
| 398 NA18853 | [2515685 chr14 | 14 | 73063171  | 73119729  | 56559  | 51   | 0.678936  | 0.020523 | 73061866  | 73064476  | 7312118   | 7312118  |
| 399 NA18853 | [2515685 chr15 | 15 | 18410351  | 18430244  | 19894  | 15   | 0.283611  | 0.038849 | 18410066  | 18410637  | 18429804  | 1843068  |
| 400 NA18853 | [2515685 chr15 | 15 | 18458940  | 18496126  | 37187  | 46   | -0.261499 | 0.017137 | 18458212  | 18459669  | 18493824  | 1850850  |
| 401 NA18853 | [2515685 chr15 | 15 | 18994433  | 18994999  | 567    | 3    | 0.359103  | 0.061618 | 18994321  | 18994545  | 18994829  | 1899516  |
| 402 NA18853 | [2515685 chr15 | 15 | 19470416  | 19507503  | 37088  | 48   | -0.26691  | 0.016924 | 19469782  | 19471051  | 19505201  | 1951992  |
| 403 NA18853 | [2515685 chr15 | 15 | 19874194  | 19883927  | 9734   | 13   | -1.301737 | 0.048866 | 19873671  | 19874718  | 19883694  | 1988416  |
| 404 NA18853 | [2515685 chr15 | 15 | 20228094  | 20234328  | 6235   | 12   | -0.366583 | 0.038262 | 20226486  | 20229703  | 20233781  | 2023487  |
| 405 NA18853 | [2515685 chr15 | 15 | 20234328  | 20250088  | 15761  | 19   | 0.263293  | 0.030826 | 20233781  | 20234875  | 20249914  | 2025026  |
| 406 NA18853 | [2515685 chr15 | 15 | 20299217  | 20300040  | 824    | 4    | 0.33176   | 0.056287 | 20299130  | 20299304  | 20299928  | 2030015  |
| 407 NA18853 | [2515685 chr15 | 15 | 20371610  | 20383831  | 12222  | 17   | -0.425087 | 0.031908 | 20367922  | 20373912  | 20383079  | 2038458  |
| 408 NA18853 | [2515685 chr15 | 15 | 20952615  | 20953477  | 863    | 5    | 0.315364  | 0.049215 | 20952542  | 20952688  | 20953390  | 2095356  |
| 409 NA18853 | [2515685 chr15 | 15 | 21118398  | 21119260  | 863    | 5    | 0.315364  | 0.049215 | 21118325  | 21118325  | 21118471  | 2111934  |
| 410 NA18853 | [2515685 chr15 | 15 | 21606753  | 21614600  | 7848   | 7    | 0.827295  | 0.063115 | 21606459  | 21607047  | 21612298  | 2163669  |
| 411 NA18853 | [2515685 chr15 | 15 | 24986053  | 24992250  | 6198   | 7    | 0.811569  | 0.061404 | 24985426  | 24986680  | 24991680  | 2499282  |
| 412 NA18853 | [2515685 chr15 | 15 | 26263874  | 26264736  | 863    | 5    | 0.315364  | 0.049215 | 26263801  | 26263947  | 26264649  | 2626482  |
| 413 NA18853 | [2515685 chr15 | 15 | 26321176  | 26331811  | 10636  | 18   | 0.289856  | 0.032653 | 26320060  | 26322293  | 26331265  | 2633235  |
| 414 NA18853 | [2515685 chr15 | 15 | 26331811  | 26343818  | 12008  | 25   | -0.393487 | 0.026276 | 26331265  | 26332358  | 26342288  | 2634534  |
| 415 NA18853 | [2515685 chr15 | 15 | 26343818  | 26536521  | 192704 | 205  | 0.27458   | 0.008838 | 26342288  | 26345348  | 26534914  | 2653812  |
| 416 NA18853 | [2515685 chr15 | 15 | 26536521  | 26542764  | 6244   | 12   | -0.386079 | 0.036702 | 26534914  | 26538129  | 26542214  | 2654331  |
| 417 NA18853 | [2515685 chr15 | 15 | 26542764  | 26553418  | 10655  | 15   | 0.292037  | 0.035214 | 26542214  | 26543314  | 26552290  | 2655454  |
| 418 NA18853 | [2515685 chr15 | 15 | 26609588  | 26610682  | 1095   | 5    | 0.315364  | 0.049215 | 26609269  | 26609907  | 26610609  | 2661075  |
| 419 NA18853 | [2515685 chr15 | 15 | 28601858  | 28602363  | 506    | 2    | 0.371528  | 0.072302 | 28601690  | 28602027  | 28602171  | 2860255  |
| 420 NA18853 | [2515685 chr15 | 15 | 32461971  | 32654853  | 192883 | 195  | 0.280591  | 0.009302 | 32461525  | 32462418  | 32654165  | 3265554  |
| 421 NA18853 | [2515685 chr15 | 15 | 42905343  | 42905934  | 592    | 2    | -0.701539 | 0.106562 | 42905218  | 42905469  | 42905888  | 4290598  |
| 422 NA18853 | [2515685 chr15 | 15 | 66450268  | 66451800  | 1533   | 2    | -0.620151 | 0.115169 | 66449997  | 66450539  | 66451265  | 6645233  |
| 423 NA18853 | [2515685 chr15 | 15 | 74671388  | 74682820  | 11433  | 9    | 0.858548  | 0.053764 | 74671122  | 74671654  | 74680518  | 7468951  |
| 424 NA18853 | [2515685 chr15 | 15 | 75117585  | 75119946  | 2362   | 4    | 0.724407  | 0.073353 | 75117343  | 75117827  | 75119741  | 7512015  |
| 425 NA18853 | [2515685 chr15 | 15 | 82333041  | 82335194  | 2154   | 2    | -0.721569 | 0.107899 | 82332284  | 82333799  | 82334729  | 8233566  |
| 426 NA18853 | [2515685 chr15 | 15 | 95613871  | 95617173  | 3303   | 2    | 0.560467  | 0.100065 | 95609763  | 95616173  | 95616758  | 9561758  |
| 427 NA18853 | [2515685 chr15 | 15 | 98234084  | 98240716  | 6633   | 8    | 0.838952  | 0.057561 | 98233842  | 98234327  | 98239350  | 9824208  |
| 428 NA18853 | [2515685 chr15 | 15 | 100109640 | 100122682 | 13043  | 98   | 0.774054  | 0.01153  | 100108905 | 100110376 | 100122315 | 10012305 |
| 429 NA18853 | [2515685 chr15 | 15 | 100266888 | 100309150 | 42263  | 16   | 0.509794  | 0.036572 | 100264210 | 100269190 | 100307499 | 10031080 |
| 430 NA18853 | [2515685 chr16 | 16 | 417757    | 421523    | 3767   | 4    | -0.810219 | 0.079675 | 417246    | 418269    | 420489    | 422557   |
| 431 NA18853 | [2515685 chr16 | 16 | 948831    | 952527    | 3697   | 39   | 0.288792  | 0.017509 | 947314    | 950349    | 952191    | 952864   |

|             |                |    |          |          |        |     |           |          |          |          |           |          |
|-------------|----------------|----|----------|----------|--------|-----|-----------|----------|----------|----------|-----------|----------|
| 432 NA18853 | [2515685 chr16 | 16 | 16470058 | 16471374 | 1317   | 2   | -0.582061 | 0.113506 | 16469461 | 16470656 | 16471174  | 1647157! |
| 433 NA18853 | [2515685 chr16 | 16 | 16633469 | 16639120 | 5652   | 4   | 0.874842  | 0.076458 | 16632502 | 16634437 | 16638386  | 1663985- |
| 434 NA18853 | [2515685 chr16 | 16 | 21753303 | 21756137 | 2835   | 20  | 0.252144  | 0.023167 | 21753014 | 21753593 | 21755984  | 2175629! |
| 435 NA18853 | [2515685 chr16 | 16 | 22452875 | 22455430 | 2556   | 18  | 0.250217  | 0.024456 | 22452722 | 22453028 | 22455152  | 2245570! |
| 436 NA18853 | [2515685 chr16 | 16 | 32085972 | 32089374 | 3403   | 8   | 0.308219  | 0.049525 | 32085808 | 32086136 | 32089207  | 3208954! |
| 437 NA18853 | [2515685 chr16 | 16 | 32097663 | 32149293 | 51631  | 145 | 0.280883  | 0.010539 | 32097514 | 32097813 | 32148896  | 3214969! |
| 438 NA18853 | [2515685 chr16 | 16 | 32159898 | 32160377 | 480    | 2   | -1.574581 | 0.093092 | 32159453 | 32160343 | 32160346  | 3216040! |
| 439 NA18853 | [2515685 chr16 | 16 | 32210096 | 32219640 | 9545   | 19  | 0.262837  | 0.026353 | 32209551 | 32210641 | 32219531  | 3221974! |
| 440 NA18853 | [2515685 chr16 | 16 | 32606692 | 32607163 | 472    | 2   | -1.574595 | 0.093093 | 32606661 | 32606724 | 32606727  | 3260759! |
| 441 NA18853 | [2515685 chr16 | 16 | 32614929 | 32669290 | 54362  | 160 | 0.27059   | 0.010044 | 32614897 | 32614961 | 32669257  | 3266932- |
| 442 NA18853 | [2515685 chr16 | 16 | 33038759 | 33092915 | 54157  | 158 | 0.271468  | 0.010106 | 33038726 | 33038792 | 33092688  | 3309314! |
| 443 NA18853 | [2515685 chr16 | 16 | 33100875 | 33101346 | 472    | 2   | -1.574581 | 0.093092 | 33100438 | 33101312 | 33101315  | 3310137! |
| 444 NA18853 | [2515685 chr16 | 16 | 33157406 | 33157879 | 474    | 2   | -1.574581 | 0.093092 | 33156967 | 33157845 | 33157848  | 3315791! |
| 445 NA18853 | [2515685 chr16 | 16 | 33207215 | 33217055 | 9841   | 18  | 0.273522  | 0.027302 | 33206951 | 33207480 | 33216946  | 3321716! |
| 446 NA18853 | [2515685 chr16 | 16 | 33858109 | 33875987 | 17879  | 13  | 0.309393  | 0.041328 | 33852692 | 33859990 | 33874106  | 3403120! |
| 447 NA18853 | [2515685 chr16 | 16 | 34321825 | 34606125 | 284301 | 322 | -0.429918 | 0.008222 | 34317185 | 34323706 | 34605058  | 3460719! |
| 448 NA18853 | [2515685 chr16 | 16 | 57204541 | 57207585 | 3045   | 3   | 4.576351  | 0.192311 | 57204170 | 57204913 | 57206938  | 5720823! |
| 449 NA18853 | [2515685 chr16 | 16 | 76930776 | 76942282 | 11507  | 9   | 0.68341   | 0.048641 | 76930290 | 76931263 | 76941602  | 7694296! |
| 450 NA18853 | [2515685 chr16 | 16 | 83994929 | 84004171 | 9243   | 81  | -0.377247 | 0.01393  | 83994558 | 83995300 | 84003767  | 8400457! |
| 451 NA18853 | [2515685 chr16 | 16 | 84562720 | 84565235 | 2516   | 11  | 0.544802  | 0.045125 | 84561685 | 84563756 | 84565142  | 8456532! |
| 452 NA18853 | [2515685 chr16 | 16 | 88710612 | 88712266 | 1655   | 8   | -0.493448 | 0.057092 | 88710473 | 88710751 | 88712200  | 8871233! |
| 453 NA18853 | [2515685 chr17 | 17 | 865381   | 867925   | 2545   | 2   | -0.633929 | 0.105052 | 863873   | 866890   | 867413    | 86843!   |
| 454 NA18853 | [2515685 chr17 | 17 | 911980   | 915554   | 3575   | 4   | -0.401409 | 0.074405 | 911452   | 912508   | 915413    | 91569!   |
| 455 NA18853 | [2515685 chr17 | 17 | 16657833 | 16665630 | 7798   | 12  | -0.420611 | 0.044387 | 16657486 | 16658180 | 16665353  | 1666590! |
| 456 NA18853 | [2515685 chr17 | 17 | 18296513 | 18327100 | 30588  | 43  | 0.449017  | 0.022351 | 18296246 | 18296781 | 18326880  | 1832732! |
| 457 NA18853 | [2515685 chr17 | 17 | 18331739 | 18332345 | 607    | 2   | -0.810103 | 0.102091 | 18331509 | 18331970 | 18331978  | 1833271! |
| 458 NA18853 | [2515685 chr17 | 17 | 20299935 | 20300531 | 597    | 2   | -0.8101   | 0.102091 | 20299568 | 20300303 | 20300311  | 2030075! |
| 459 NA18853 | [2515685 chr17 | 17 | 20304465 | 20335856 | 31392  | 44  | 0.393841  | 0.021547 | 20304107 | 20304823 | 20335559  | 2033615! |
| 460 NA18853 | [2515685 chr17 | 17 | 20368693 | 20371943 | 3251   | 7   | 0.329344  | 0.053379 | 20367677 | 20369709 | 20371308  | 2037257! |
| 461 NA18853 | [2515685 chr17 | 17 | 20571353 | 20578410 | 7058   | 6   | 0.531902  | 0.061153 | 20571124 | 20571582 | 205717452 | 2057936! |
| 462 NA18853 | [2515685 chr17 | 17 | 20644041 | 20648732 | 4692   | 4   | 0.614699  | 0.073761 | 20643647 | 20644435 | 20647744  | 2064972! |
| 463 NA18853 | [2515685 chr17 | 17 | 21942843 | 21954469 | 11627  | 19  | -0.413723 | 0.033199 | 21942618 | 21943068 | 21954310  | 2195462! |
| 464 NA18853 | [2515685 chr17 | 17 | 31430406 | 31835531 | 405126 | 542 | 0.74041   | 0.004749 | 31429658 | 31431155 | 31835215  | 3183584! |
| 465 NA18853 | [2515685 chr17 | 17 | 31865078 | 31886556 | 21479  | 65  | 0.74041   | 0.004749 | 31864350 | 31865807 | 31886086  | 3188702! |
| 466 NA18853 | [2515685 chr17 | 17 | 32829500 | 32833231 | 3732   | 5   | 0.773668  | 0.074412 | 32828825 | 32830175 | 32832670  | 3283379! |
| 467 NA18853 | [2515685 chr17 | 17 | 33288815 | 33289544 | 730    | 3   | 0.410985  | 0.069062 | 33288407 | 33289224 | 33289524  | 3328956! |
| 468 NA18853 | [2515685 chr17 | 17 | 33348941 | 33351216 | 2276   | 6   | -0.267409 | 0.045799 | 33348664 | 33349218 | 33351036  | 3335139! |
| 469 NA18853 | [2515685 chr17 | 17 | 33353966 | 33425145 | 71180  | 170 | 0.581247  | 0.005998 | 33353659 | 33354273 | 33424532  | 3342575! |
| 470 NA18853 | [2515685 chr17 | 17 | 33430791 | 33556628 | 125838 | 78  | 0.581247  | 0.005998 | 33428591 | 33529290 | 33556321  | 3355693! |
| 471 NA18853 | [2515685 chr17 | 17 | 33585313 | 33654387 | 69075  | 119 | 0.581247  | 0.005998 | 33584586 | 33586040 | 33653601  | 3365517! |
| 472 NA18853 | [2515685 chr17 | 17 | 36636559 | 36685343 | 48785  | 45  | -0.443969 | 0.021397 | 36635767 | 36637352 | 36684647  | 3668604! |
| 473 NA18853 | [2515685 chr17 | 17 | 36993884 | 36995674 | 1791   | 2   | -0.674084 | 0.093159 | 36993311 | 36994458 | 36995333  | 3699601! |
| 474 NA18853 | [2515685 chr17 | 17 | 41006614 | 41017119 | 10506  | 13  | -0.288711 | 0.041218 | 41006215 | 41007013 | 41016872  | 4101736! |
| 475 NA18853 | [2515685 chr17 | 17 | 41789182 | 41907909 | 118728 | 115 | 0.309013  | 0.010575 | 41788428 | 41789936 | 41907480  | 4190833! |
| 476 NA18853 | [2515685 chr17 | 17 | 41964733 | 41980180 | 15448  | 15  | 0.275743  | 0.030022 | 41964517 | 41964949 | 41979673  | 4198068! |
| 477 NA18853 | [2515685 chr17 | 17 | 42006681 | 42125479 | 118799 | 111 | 0.311192  | 0.01073  | 42005927 | 42007435 | 42125050  | 4212590! |
| 478 NA18853 | [2515685 chr17 | 17 | 42975972 | 43026670 | 50699  | 73  | 0.77653   | 0.018079 | 42975162 | 42976783 | 43025568  | 4302777! |
| 479 NA18853 | [2515685 chr17 | 17 | 55368842 | 55373984 | 5143   | 7   | 0.55969   | 0.058438 | 55368278 | 55369406 | 55373396  | 5537457! |
| 480 NA18853 | [2515685 chr17 | 17 | 55434888 | 55452232 | 17345  | 33  | 0.528239  | 0.021409 | 55434445 | 55435332 | 55451888  | 5545257! |
| 481 NA18853 | [2515685 chr17 | 17 | 55457995 | 55459798 | 1804   | 2   | 1.105716  | 0.115501 | 55457669 | 55458322 | 55459168  | 5546042! |
| 482 NA18853 | [2515685 chr17 | 17 | 55550803 | 55552834 | 2032   | 2   | 1.105716  | 0.115501 | 55549945 | 55551662 | 55552508  | 5555316! |
| 483 NA18853 | [2515685 chr17 | 17 | 57652724 | 57667804 | 15081  | 18  | 0.527811  | 0.013842 | 57652052 | 57653396 | 57667259  | 5766834! |
| 484 NA18853 | [2515685 chr17 | 17 | 57681793 | 57708812 | 27020  | 57  | 0.527811  | 0.013842 | 57680114 | 57683473 | 57708467  | 5770915! |
| 485 NA18853 | [2515685 chr18 | 18 | 24076370 | 24179413 | 103044 | 2   | -0.715819 | 0.108642 | 24003903 | 24080953 | 24174830  | 2428681- |
| 486 NA18853 | [2515685 chr18 | 18 | 28142218 | 28143399 | 1182   | 2   | 0.656707  | 0.11691  | 28141854 | 28142583 | 28143055  | 2814374- |

|             |                |    |          |          |        |     |           |          |          |          |          |          |
|-------------|----------------|----|----------|----------|--------|-----|-----------|----------|----------|----------|----------|----------|
| 487 NA18853 | [2515685 chr18 | 18 | 36514289 | 36521090 | 6802   | 6   | -0.851154 | 0.062085 | 36513759 | 36514820 | 36520512 | 36521666 |
| 488 NA18853 | [2515685 chr18 | 18 | 63110558 | 63117706 | 7149   | 8   | -0.738364 | 0.055739 | 63110373 | 63110744 | 63116010 | 63119400 |
| 489 NA18853 | [2515685 chr18 | 18 | 74230393 | 74234275 | 3883   | 31  | -0.263207 | 0.016331 | 74229835 | 74230952 | 74234139 | 74234410 |
| 490 NA18853 | [2515685 chr18 | 18 | 74294822 | 74299391 | 4570   | 8   | -0.279987 | 0.049287 | 74294454 | 74295191 | 74299167 | 74299610 |
| 491 NA18853 | [2515685 chr18 | 18 | 74373005 | 74376367 | 3363   | 7   | -0.557902 | 0.034995 | 74372064 | 74373947 | 74375833 | 74376900 |
| 492 NA18853 | [2515685 chr18 | 18 | 74392800 | 74397377 | 4578   | 3   | 1.025432  | 0.099106 | 74390826 | 74394774 | 74396965 | 74397790 |
| 493 NA18853 | [2515685 chr19 | 19 | 14054    | 122499   | 108446 | 128 | 0.268217  | 0.012467 | 13672    | 14437    | 119972   | 128093   |
| 494 NA18853 | [2515685 chr19 | 19 | 310414   | 314479   | 4066   | 15  | -0.559837 | 0.037206 | 309687   | 311142   | 312994   | 315964   |
| 495 NA18853 | [2515685 chr19 | 19 | 331568   | 333129   | 1562   | 2   | 1.373909  | 0.110512 | 331314   | 331822   | 332310   | 333948   |
| 496 NA18853 | [2515685 chr19 | 19 | 8708780  | 8760468  | 51689  | 89  | -0.845214 | 0.010487 | 8708296  | 8709264  | 8760209  | 8760720  |
| 497 NA18853 | [2515685 chr19 | 19 | 8760950  | 8763535  | 2586   | 4   | -0.430118 | 0.066717 | 8760727  | 8761174  | 8763160  | 8763910  |
| 498 NA18853 | [2515685 chr19 | 19 | 22138418 | 22139106 | 689    | 3   | 0.611603  | 0.09508  | 22138302 | 22138535 | 22138998 | 22139210 |
| 499 NA18853 | [2515685 chr19 | 19 | 22200360 | 22240041 | 39682  | 20  | 0.282506  | 0.034001 | 22199151 | 22201569 | 22239807 | 22240270 |
| 500 NA18853 | [2515685 chr19 | 19 | 22931050 | 22934541 | 3492   | 2   | 1.107558  | 0.114007 | 22918199 | 22933577 | 22934109 | 22934970 |
| 501 NA18853 | [2515685 chr19 | 19 | 23007904 | 23013841 | 5938   | 6   | 0.771103  | 0.067143 | 22990964 | 23010431 | 23013525 | 23014150 |
| 502 NA18853 | [2515685 chr19 | 19 | 23108259 | 23109446 | 1188   | 2   | 0.80095   | 0.110287 | 23107903 | 23108615 | 23108879 | 23110010 |
| 503 NA18853 | [2515685 chr19 | 19 | 23166066 | 23171357 | 5292   | 6   | 0.815145  | 0.063539 | 23165304 | 23166829 | 23170729 | 23171980 |
| 504 NA18853 | [2515685 chr19 | 19 | 23257205 | 23258538 | 1334   | 2   | -0.947311 | 0.121393 | 23256882 | 23257529 | 23258213 | 23258860 |
| 505 NA18853 | [2515685 chr19 | 19 | 24169035 | 24169127 | 93     | 3   | -0.842744 | 0.094101 | 24169019 | 24169051 | 24169114 | 24169140 |
| 506 NA18853 | [2515685 chr19 | 19 | 39419837 | 39421349 | 1513   | 3   | 0.538477  | 0.093858 | 39419616 | 39420059 | 39421018 | 39421680 |
| 507 NA18853 | [2515685 chr19 | 19 | 39832838 | 39842048 | 9211   | 3   | -0.886769 | 0.097021 | 39832668 | 39833009 | 39839521 | 39846410 |
| 508 NA18853 | [2515685 chr19 | 19 | 53097313 | 53154327 | 57015  | 106 | -0.456414 | 0.005087 | 53096909 | 53097718 | 53152350 | 53156300 |
| 509 NA18853 | [2515685 chr19 | 19 | 55285877 | 55336157 | 50281  | 104 | -0.456414 | 0.005087 | 55285730 | 55286025 | 55335244 | 55337070 |
| 510 NA18853 | [2515685 chr19 | 19 | 58209430 | 58245460 | 36031  | 28  | -0.682782 | 0.027555 | 58208997 | 58209863 | 58245024 | 58245890 |
| 511 NA18853 | [2515685 chr19 | 19 | 59247755 | 59252061 | 4307   | 5   | 0.797291  | 0.070205 | 59246427 | 59249084 | 59251854 | 59252260 |
| 512 NA18853 | [2515685 chr19 | 19 | 59417162 | 59439536 | 22375  | 30  | 0.276821  | 0.024445 | 59416759 | 59417566 | 59439526 | 59439540 |
| 513 NA18853 | [2515685 chr19 | 19 | 60958920 | 60976029 | 17110  | 15  | -0.720816 | 0.039381 | 60957933 | 60959907 | 60975748 | 60976310 |
| 514 NA18853 | [2515685 chr20 | 20 | 22273459 | 22278178 | 4720   | 6   | -0.868767 | 0.071551 | 22272471 | 22274448 | 22277490 | 22277886 |
| 515 NA18853 | [2515685 chr20 | 20 | 25769130 | 25774048 | 4919   | 7   | -0.423347 | 0.055904 | 25768333 | 25769927 | 25773787 | 25774310 |
| 516 NA18853 | [2515685 chr20 | 20 | 25941300 | 25944046 | 2747   | 4   | -0.453741 | 0.071078 | 25940088 | 25942512 | 25943249 | 25944840 |
| 517 NA18853 | [2515685 chr20 | 20 | 26147697 | 26161501 | 13805  | 23  | -0.579579 | 0.031184 | 26147451 | 26147944 | 26161227 | 26161770 |
| 518 NA18853 | [2515685 chr20 | 20 | 35736931 | 35738843 | 1913   | 2   | 0.816604  | 0.117826 | 35736234 | 35737629 | 35738606 | 35739080 |
| 519 NA18853 | [2515685 chr20 | 20 | 59951513 | 59957050 | 5538   | 18  | 0.268857  | 0.032083 | 59950681 | 59952345 | 59956538 | 59957560 |
| 520 NA18853 | [2515685 chr20 | 20 | 61708834 | 61711805 | 2972   | 22  | -0.435384 | 0.031626 | 61708573 | 61709096 | 61711616 | 61711990 |
| 521 NA18853 | [2515685 chr20 | 20 | 61752758 | 61754878 | 2121   | 2   | -0.496973 | 0.085551 | 61752142 | 61753375 | 61754167 | 61755580 |
| 522 NA18853 | [2515685 chr20 | 20 | 62066380 | 62068214 | 1835   | 8   | 1.111743  | 0.054918 | 62066146 | 62066615 | 62067671 | 62068750 |
| 523 NA18853 | [2515685 chr20 | 20 | 62233505 | 62235897 | 2393   | 4   | 0.457955  | 0.055805 | 62232847 | 62234163 | 62235101 | 62236690 |
| 524 NA18853 | [2515685 chr21 | 21 | 20637720 | 20638267 | 548    | 2   | -0.532744 | 0.098671 | 20637505 | 20637936 | 20638041 | 20638490 |
| 525 NA18853 | [2515685 chr21 | 21 | 22108709 | 22109827 | 1119   | 2   | -0.845381 | 0.108535 | 22108337 | 22109081 | 22109454 | 22110200 |
| 526 NA18853 | [2515685 chr22 | 22 | 14483497 | 14514238 | 30742  | 52  | -0.377364 | 0.019331 | 14483290 | 14483705 | 14513919 | 14514550 |
| 527 NA18853 | [2515685 chr22 | 22 | 14641933 | 14645230 | 3298   | 6   | -0.489194 | 0.051176 | 14641837 | 14642029 | 14645096 | 14645360 |
| 528 NA18853 | [2515685 chr22 | 22 | 16951608 | 16952698 | 1091   | 2   | -0.539743 | 0.099374 | 16951323 | 16951894 | 16952432 | 16952960 |
| 529 NA18853 | [2515685 chr22 | 22 | 17385504 | 17393232 | 7729   | 14  | -0.298741 | 0.039147 | 17385031 | 17385977 | 17392823 | 17393640 |
| 530 NA18853 | [2515685 chr22 | 22 | 18689533 | 18734175 | 44643  | 52  | -0.252617 | 0.01814  | 18686307 | 18692211 | 18733858 | 18734490 |
| 531 NA18853 | [2515685 chr22 | 22 | 18744519 | 18852820 | 108302 | 132 | -0.410244 | 0.012569 | 18742262 | 18746777 | 18852767 | 18852870 |
| 532 NA18853 | [2515685 chr22 | 22 | 18998692 | 19018641 | 19950  | 12  | -0.373888 | 0.034944 | 18998404 | 18998981 | 19018321 | 19018960 |
| 533 NA18853 | [2515685 chr22 | 22 | 19392079 | 19419484 | 27406  | 8   | -0.53581  | 0.052487 | 19391751 | 19392407 | 19416806 | 19449920 |
| 534 NA18853 | [2515685 chr22 | 22 | 19829874 | 19880162 | 50289  | 72  | -0.2602   | 0.015348 | 19829808 | 19829940 | 19879848 | 19880470 |
| 535 NA18853 | [2515685 chr22 | 22 | 20001890 | 20121795 | 119906 | 165 | -0.347613 | 0.007838 | 20001715 | 20002065 | 20121548 | 20122040 |
| 536 NA18853 | [2515685 chr22 | 22 | 20137248 | 20243639 | 106392 | 148 | -0.347613 | 0.007838 | 20136561 | 20137935 | 20240961 | 20302228 |
| 537 NA18853 | [2515685 chr22 | 22 | 22672624 | 22691501 | 18878  | 17  | 0.666951  | 0.02396  | 22672391 | 22672858 | 22691088 | 22691910 |
| 538 NA18853 | [2515685 chr22 | 22 | 22695407 | 22720154 | 24748  | 27  | 0.666951  | 0.02396  | 22695112 | 22695703 | 22719882 | 22720420 |
| 539 NA18853 | [2515685 chr22 | 22 | 23763753 | 23765515 | 1763   | 3   | -0.470255 | 0.084198 | 23763486 | 23764021 | 23765293 | 23765730 |
| 540 NA18853 | [2515685 chr22 | 22 | 33619409 | 33623490 | 4082   | 5   | 0.720899  | 0.066259 | 33618939 | 33619879 | 33622642 | 33624330 |
| 541 NA18853 | [2515685 chr22 | 22 | 41235714 | 41274269 | 38556  | 27  | 0.311672  | 0.028081 | 41235467 | 41235962 | 41274060 | 41274470 |



|             |                |    |           |           |        |     |           |          |           |           |           |          |
|-------------|----------------|----|-----------|-----------|--------|-----|-----------|----------|-----------|-----------|-----------|----------|
| 542 NA18853 | [2515685 chr22 | 22 | 43975689  | 43977458  | 1770   | 2   | -0.509984 | 0.100776 | 43974792  | 43976586  | 43977080  | 43977837 |
| 543 NA18853 | [2515685 chrX  | 23 | 1954542   | 1958817   | 4276   | 5   | -0.655431 | 0.064456 | 1954338   | 1954747   | 1958235   | 1959400  |
| 544 NA18853 | [2515685 chrX  | 23 | 2286200   | 2288297   | 2098   | 2   | 0.673727  | 0.089202 | 2285671   | 2286730   | 2287550   | 2289045  |
| 545 NA18853 | [2515685 chrX  | 23 | 9182407   | 9192056   | 9650   | 13  | 0.379309  | 0.039082 | 9181838   | 9182977   | 9191527   | 9192586  |
| 546 NA18853 | [2515685 chrX  | 23 | 48909988  | 49070905  | 160918 | 121 | -0.384582 | 0.009106 | 48906199  | 48913778  | 49070239  | 49071577 |
| 547 NA18853 | [2515685 chrX  | 23 | 70741274  | 70745998  | 4725   | 38  | 2.783797  | 0.040917 | 70739871  | 70742677  | 70744597  | 70747400 |
| 548 NA18853 | [2515685 chrX  | 23 | 105478359 | 105479862 | 1504   | 2   | -0.770332 | 0.095865 | 105477870 | 105478848 | 105479594 | 10548013 |
| 549 NA18853 | [2515685 chrX  | 23 | 114782515 | 114796920 | 14406  | 36  | -0.372835 | 0.013006 | 114781834 | 114783196 | 114796162 | 11479767 |
| 550 NA18853 | [2515685 chrX  | 23 | 114804126 | 114821024 | 16899  | 36  | -0.372835 | 0.013006 | 114803617 | 114804636 | 114817056 | 11483607 |
| 551 NA18853 | [2515685 chrX  | 23 | 119787748 | 119849727 | 61980  | 85  | -0.336849 | 0.010559 | 119787006 | 119788491 | 119845759 | 11985498 |
| 552 NA18853 | [2515685 chrX  | 23 | 134569408 | 134625407 | 56000  | 104 | 0.495708  | 0.007509 | 134569294 | 134569522 | 134624877 | 13462593 |
| 553 NA18853 | [2515685 chrX  | 23 | 134645810 | 134698023 | 52214  | 106 | 0.495708  | 0.007509 | 134645280 | 134646341 | 134696803 | 13469924 |
| 554 NA18853 | [2515685 chrX  | 23 | 134746548 | 134755274 | 8727   | 11  | 0.447743  | 0.036506 | 134738264 | 134750516 | 134755112 | 13475543 |
| 555 NA18853 | [2515685 chrX  | 23 | 139806116 | 139842391 | 36276  | 47  | 0.392393  | 0.015641 | 139802399 | 139809834 | 139842274 | 13984250 |
| 556 NA18853 | [2515685 chrX  | 23 | 140043042 | 140066704 | 23663  | 27  | 0.341736  | 0.021975 | 140042826 | 140043259 | 140062736 | 14007331 |
| 557 NA18853 | [2515685 chrX  | 23 | 140378279 | 140413881 | 35603  | 49  | 0.397767  | 0.015697 | 140378162 | 140378397 | 140411067 | 14041669 |
| 558 NA18853 | [2515685 chrX  | 23 | 140500460 | 140513745 | 13286  | 26  | 0.398648  | 0.022472 | 140492162 | 140504428 | 140512707 | 14051478 |
| 559 NA18853 | [2515685 chrY  | 24 | 1954542   | 1958817   | 4276   | 5   | -0.655431 | 0.064456 | 1954338   | 1954747   | 1958235   | 1959400  |
| 560 NA18853 | [2515685 chrY  | 24 | 2286200   | 2288297   | 2098   | 2   | 0.673727  | 0.089202 | 2285671   | 2286730   | 2287550   | 2289045  |
| 561 NA18853 | [2515685 chrY  | 24 | 3761292   | 4160664   | 399373 | 2   | 0.609564  | 0.096176 | 3640785   | 3764230   | 4157726   | 4581358  |
| 562 NA18853 | [2515685 chrY  | 24 | 10326793  | 10340296  | 13504  | 7   | 0.289544  | 0.049117 | 10325529  | 10328058  | 10339804  | 10340788 |
| 563 NA18853 | [2515685 chrY  | 24 | 23624926  | 23627459  | 2534   | 7   | -0.394531 | 0.049259 | 23624485  | 23625368  | 23627340  | 23627577 |
| 564 NA18853 | [2515685 chrY  | 24 | 23628713  | 23649003  | 20291  | 38  | -0.588871 | 0.018266 | 23628548  | 23628879  | 23648757  | 23649245 |
| 565 NA18853 | [2515685 chrY  | 24 | 23716390  | 23748616  | 32227  | 65  | -0.592329 | 0.013679 | 23716144  | 23716636  | 23748451  | 23748787 |
| 566 NA18853 | [2515685 chrY  | 24 | 23749871  | 23764324  | 14454  | 46  | -0.313439 | 0.018052 | 23749752  | 23749991  | 23763883  | 23764761 |
| 567 NA18853 | [2515685 chrY  | 24 | 25260052  | 25284425  | 24374  | 47  | -0.634247 | 0.017209 | 25259887  | 25260218  | 25284278  | 25284577 |
| 568 NA18853 | [2515685 chrY  | 24 | 25341625  | 25366673  | 25049  | 45  | -0.613093 | 0.017136 | 25341379  | 25341871  | 25366508  | 25366837 |
| 569 NA18853 | [2515685 chrY  | 24 | 25367928  | 25379999  | 12072  | 35  | -0.336061 | 0.021259 | 25367809  | 25368048  | 25379558  | 25380447 |
| 1 NA19173   | [2515685 chr1  | 1  | 29401     | 76985     | 47585  | 55  | 0.416589  | 0.01927  | 27752     | 31050     | 76641     | 77329    |
| 2 NA19173   | [2515685 chr1  | 1  | 435732    | 436343    | 612    | 2   | 0.604034  | 0.107559 | 435179    | 436286    | 436286    | 436401   |
| 3 NA19173   | [2515685 chr1  | 1  | 445269    | 449412    | 4144   | 3   | 0.657899  | 0.103273 | 444422    | 446116    | 446143    | 455992   |
| 4 NA19173   | [2515685 chr1  | 1  | 601046    | 612159    | 11114  | 7   | -0.688356 | 0.054616 | 587801    | 604315    | 610122    | 614196   |
| 5 NA19173   | [2515685 chr1  | 1  | 620783    | 624922    | 4140   | 3   | 0.6579    | 0.103273 | 614196    | 624052    | 624079    | 625766   |
| 6 NA19173   | [2515685 chr1  | 1  | 633837    | 634448    | 612    | 2   | 0.604034  | 0.107559 | 633780    | 633895    | 633895    | 635002   |
| 7 NA19173   | [2515685 chr1  | 1  | 1595518   | 1653053   | 57536  | 5   | 0.335565  | 0.063874 | 1595139   | 1595897   | 1652846   | 1653260  |
| 8 NA19173   | [2515685 chr1  | 1  | 1679092   | 1692185   | 13094  | 14  | 0.258591  | 0.037931 | 1678332   | 1679852   | 1691822   | 1692548  |
| 9 NA19173   | [2515685 chr1  | 1  | 1853012   | 1854645   | 1634   | 2   | 0.803259  | 0.099153 | 1852616   | 1853409   | 1853816   | 1855474  |
| 10 NA19173  | [2515685 chr1  | 1  | 6429824   | 6452869   | 23046  | 4   | -0.438646 | 0.069609 | 6412294   | 6433093   | 6449600   | 6526270  |
| 11 NA19173  | [2515685 chr1  | 1  | 10416438  | 10418311  | 1874   | 2   | -0.693846 | 0.093637 | 10415863  | 10417014  | 10417712  | 10418917 |
| 12 NA19173  | [2515685 chr1  | 1  | 12677860  | 12681083  | 3224   | 3   | -0.507493 | 0.090699 | 12677413  | 12678308  | 12679940  | 12682221 |
| 13 NA19173  | [2515685 chr1  | 1  | 12833670  | 12863838  | 30169  | 42  | 0.321197  | 0.021792 | 12833445  | 12833896  | 12860569  | 12868617 |
| 14 NA19173  | [2515685 chr1  | 1  | 12883780  | 12886858  | 3079   | 5   | 0.490395  | 0.059031 | 12883337  | 12884224  | 12886536  | 12887181 |
| 15 NA19173  | [2515685 chr1  | 1  | 12887630  | 12888178  | 549    | 2   | 0.518638  | 0.100478 | 12887352  | 12887909  | 12887924  | 12888437 |
| 16 NA19173  | [2515685 chr1  | 1  | 13084062  | 13091899  | 7838   | 5   | -0.364639 | 0.059436 | 13084055  | 13084070  | 13091561  | 13092237 |
| 17 NA19173  | [2515685 chr1  | 1  | 13158620  | 13159168  | 549    | 2   | 0.518638  | 0.100478 | 13158367  | 13158874  | 13158889  | 13159447 |
| 18 NA19173  | [2515685 chr1  | 1  | 13159940  | 13162706  | 2767   | 4   | 0.544096  | 0.060278 | 13159618  | 13160263  | 13162366  | 13163304 |
| 19 NA19173  | [2515685 chr1  | 1  | 13379417  | 13379965  | 549    | 2   | 0.518638  | 0.100478 | 13379164  | 13379671  | 13379686  | 13380247 |
| 20 NA19173  | [2515685 chr1  | 1  | 13380737  | 13383503  | 2767   | 4   | 0.544096  | 0.060278 | 13380415  | 13381060  | 13383163  | 13383847 |
| 21 NA19173  | [2515685 chr1  | 1  | 13518505  | 13522174  | 3670   | 4   | -0.782974 | 0.083074 | 13517560  | 13519451  | 13521947  | 13522407 |
| 22 NA19173  | [2515685 chr1  | 1  | 16546501  | 17026185  | 479685 | 583 | -0.285035 | 0.005848 | 16545973  | 16547030  | 17025840  | 17026531 |
| 23 NA19173  | [2515685 chr1  | 1  | 21526831  | 21539160  | 12330  | 11  | -0.317955 | 0.04211  | 21526375  | 21527287  | 21538950  | 21539371 |
| 24 NA19173  | [2515685 chr1  | 1  | 55013192  | 55017138  | 3947   | 4   | -0.813114 | 0.076689 | 55012686  | 55013699  | 55015642  | 55018637 |
| 25 NA19173  | [2515685 chr1  | 1  | 55556725  | 55686418  | 129694 | 2   | -0.548289 | 0.092614 | 55440776  | 55559994  | 55683149  | 55796857 |
| 26 NA19173  | [2515685 chr1  | 1  | 72478372  | 72524180  | 45809  | 36  | -2.341225 | 0.040662 | 72478140  | 72478604  | 72523661  | 72524701 |
| 27 NA19173  | [2515685 chr1  | 1  | 89188117  | 89190762  | 2646   | 5   | 1.485631  | 0.082856 | 89187764  | 89188470  | 89190458  | 89191067 |

|            |               |   |           |           |        |     |           |          |           |           |           |          |
|------------|---------------|---|-----------|-----------|--------|-----|-----------|----------|-----------|-----------|-----------|----------|
| 28 NA19173 | [2515685 chr1 | 1 | 100153521 | 100155903 | 2383   | 3   | 0.405261  | 0.07477  | 100153153 | 100153890 | 100155558 | 10015624 |
| 29 NA19173 | [2515685 chr1 | 1 | 103815525 | 104015739 | 200215 | 312 | 0.287196  | 0.007667 | 103815249 | 103815802 | 104013178 | 10401830 |
| 30 NA19173 | [2515685 chr1 | 1 | 105728161 | 105735462 | 7302   | 8   | -0.89761  | 0.061783 | 105727820 | 105728503 | 105734532 | 10573639 |
| 31 NA19173 | [2515685 chr1 | 1 | 108444641 | 108449550 | 4910   | 9   | 0.683867  | 0.051427 | 108443817 | 108445466 | 108449224 | 10844987 |
| 32 NA19173 | [2515685 chr1 | 1 | 108514938 | 108565175 | 50238  | 58  | 0.354008  | 0.019528 | 108514864 | 108515012 | 108565023 | 10856532 |
| 33 NA19173 | [2515685 chr1 | 1 | 108638318 | 108688767 | 50450  | 59  | 0.36212   | 0.019284 | 108638254 | 108638383 | 108688693 | 10868884 |
| 34 NA19173 | [2515685 chr1 | 1 | 109936541 | 109953240 | 16700  | 22  | 0.535707  | 0.030357 | 109935803 | 109937279 | 109952761 | 10995372 |
| 35 NA19173 | [2515685 chr1 | 1 | 109954457 | 109966604 | 12148  | 8   | 0.284374  | 0.054702 | 109954248 | 109954666 | 109966387 | 10996682 |
| 36 NA19173 | [2515685 chr1 | 1 | 112405902 | 112416691 | 10790  | 10  | 0.438636  | 0.050087 | 112405415 | 112406389 | 112416423 | 11241696 |
| 37 NA19173 | [2515685 chr1 | 1 | 120525058 | 120526321 | 1264   | 20  | 0.28348   | 0.033935 | 120524971 | 120525146 | 120526304 | 12052633 |
| 38 NA19173 | [2515685 chr1 | 1 | 141384807 | 141390308 | 5502   | 7   | 0.377793  | 0.052906 | 120962965 | 141388076 | 141390261 | 14139035 |
| 39 NA19173 | [2515685 chr1 | 1 | 141863013 | 141863638 | 626    | 2   | -0.929865 | 0.097394 | 141862734 | 141863293 | 141863308 | 14186396 |
| 40 NA19173 | [2515685 chr1 | 1 | 142193089 | 142305241 | 112153 | 30  | -0.278146 | 0.025778 | 142193003 | 142193176 | 142304990 | 14230549 |
| 41 NA19173 | [2515685 chr1 | 1 | 142375186 | 142378533 | 3348   | 5   | -0.49403  | 0.062295 | 142374812 | 142375561 | 142377854 | 14237921 |
| 42 NA19173 | [2515685 chr1 | 1 | 142744385 | 142745273 | 889    | 2   | 0.820687  | 0.12376  | 142743794 | 142744976 | 142745023 | 14274552 |
| 43 NA19173 | [2515685 chr1 | 1 | 143411840 | 143413463 | 1624   | 3   | -0.679373 | 0.084686 | 143411682 | 143411998 | 143413296 | 14341363 |
| 44 NA19173 | [2515685 chr1 | 1 | 143450302 | 143460411 | 10110  | 14  | -0.394914 | 0.038482 | 143449504 | 143451100 | 143460098 | 14346072 |
| 45 NA19173 | [2515685 chr1 | 1 | 143557153 | 143558785 | 1633   | 3   | -0.656436 | 0.091638 | 143556995 | 143557312 | 143558317 | 14355925 |
| 46 NA19173 | [2515685 chr1 | 1 | 144708819 | 144710441 | 1623   | 3   | -0.679373 | 0.084686 | 144708661 | 144708977 | 144710274 | 14471060 |
| 47 NA19173 | [2515685 chr1 | 1 | 145819213 | 145840436 | 21224  | 25  | 0.330639  | 0.029876 | 145819164 | 145819262 | 145840201 | 14584067 |
| 48 NA19173 | [2515685 chr1 | 1 | 145929568 | 145951531 | 21964  | 26  | 0.415031  | 0.027992 | 145929405 | 145929732 | 145951467 | 14595159 |
| 49 NA19173 | [2515685 chr1 | 1 | 146020427 | 146021522 | 1096   | 2   | 0.773853  | 0.130097 | 146020251 | 146020603 | 146021213 | 14602183 |
| 50 NA19173 | [2515685 chr1 | 1 | 146444076 | 146444725 | 650    | 2   | -0.929865 | 0.097394 | 146443720 | 146444432 | 146444447 | 14644500 |
| 51 NA19173 | [2515685 chr1 | 1 | 146808546 | 146809451 | 906    | 2   | -0.692177 | 0.098307 | 146808090 | 146809003 | 146809142 | 14680976 |
| 52 NA19173 | [2515685 chr1 | 1 | 149368571 | 149401669 | 33099  | 23  | 0.770503  | 0.03286  | 149368105 | 149369038 | 149399791 | 14940354 |
| 53 NA19173 | [2515685 chr1 | 1 | 149573821 | 149583431 | 9611   | 5   | 0.865133  | 0.077857 | 149573460 | 149574182 | 149582912 | 14958395 |
| 54 NA19173 | [2515685 chr1 | 1 | 151994188 | 151997250 | 3063   | 5   | 0.424016  | 0.064001 | 151993204 | 151995172 | 151997018 | 15199748 |
| 55 NA19173 | [2515685 chr1 | 1 | 151997250 | 152017356 | 20107  | 25  | 1.171735  | 0.032273 | 151997018 | 151997482 | 152017067 | 15201764 |
| 56 NA19173 | [2515685 chr1 | 1 | 152019768 | 152027270 | 7503   | 9   | 0.514076  | 0.046332 | 152019408 | 152020128 | 152026931 | 15202760 |
| 57 NA19173 | [2515685 chr1 | 1 | 158372273 | 158374264 | 1992   | 3   | -0.584485 | 0.092838 | 158372059 | 158372488 | 158373972 | 15837455 |
| 58 NA19173 | [2515685 chr1 | 1 | 193443495 | 193448820 | 5326   | 7   | -0.42478  | 0.055693 | 193443280 | 193443710 | 193448631 | 19344901 |
| 59 NA19173 | [2515685 chr1 | 1 | 193452077 | 193546540 | 94464  | 83  | -0.948787 | 0.019134 | 193449476 | 193454678 | 193543271 | 19355198 |
| 60 NA19173 | [2515685 chr1 | 1 | 193615246 | 193650443 | 35198  | 31  | -0.342921 | 0.025869 | 193615441 | 193615441 | 193650245 | 19365064 |
| 61 NA19173 | [2515685 chr1 | 1 | 220570241 | 220571400 | 1160   | 2   | 0.575173  | 0.101061 | 220569940 | 220570543 | 220571101 | 22057170 |
| 62 NA19173 | [2515685 chr1 | 1 | 233202665 | 233204956 | 2292   | 42  | -0.58889  | 0.021181 | 233202312 | 233203018 | 233204364 | 23320554 |
| 63 NA19173 | [2515685 chr1 | 1 | 236719047 | 236720968 | 1922   | 3   | -2.844856 | 0.135681 | 236718751 | 236719344 | 236720749 | 23672118 |
| 64 NA19173 | [2515685 chr1 | 1 | 243009520 | 243011368 | 1849   | 3   | -0.593398 | 0.083108 | 243008430 | 243010610 | 243011204 | 24301153 |
| 65 NA19173 | [2515685 chr1 | 1 | 244454457 | 244455720 | 1264   | 2   | 0.540449  | 0.097844 | 244453912 | 244455003 | 244455330 | 24445611 |
| 66 NA19173 | [2515685 chr1 | 1 | 244471335 | 244472128 | 794    | 2   | -0.551145 | 0.100623 | 244471128 | 244471543 | 244471950 | 24447230 |
| 67 NA19173 | [2515685 chr1 | 1 | 245192200 | 245200716 | 8517   | 8   | -2.242361 | 0.086757 | 245191047 | 245193354 | 245200082 | 24520135 |
| 68 NA19173 | [2515685 chr2 | 2 | 296456    | 298925    | 2470   | 8   | -0.513104 | 0.053063 | 296213    | 296699    | 298661    | 299185   |
| 69 NA19173 | [2515685 chr2 | 2 | 6248930   | 6258838   | 9909   | 11  | -0.971322 | 0.048392 | 6248417   | 6249444   | 6258311   | 6259366  |
| 70 NA19173 | [2515685 chr2 | 2 | 29552949  | 29556851  | 3903   | 5   | -0.678647 | 0.072076 | 29552597  | 29553301  | 29556393  | 29557301 |
| 71 NA19173 | [2515685 chr2 | 2 | 34606446  | 34644763  | 38318  | 39  | 0.703587  | 0.025498 | 34601818  | 34609397  | 34641812  | 3464839  |
| 72 NA19173 | [2515685 chr2 | 2 | 35896479  | 35905930  | 9452   | 3   | -0.768365 | 0.086871 | 35879425  | 35899430  | 35902979  | 3590982  |
| 73 NA19173 | [2515685 chr2 | 2 | 37869648  | 37911473  | 41826  | 43  | -0.413942 | 0.022696 | 37869077  | 37870220  | 37911214  | 3791173  |
| 74 NA19173 | [2515685 chr2 | 2 | 41150648  | 41161411  | 10764  | 12  | -0.85479  | 0.045294 | 41150471  | 41150826  | 41160114  | 41162701 |
| 75 NA19173 | [2515685 chr2 | 2 | 55822423  | 55850659  | 28237  | 29  | 0.539425  | 0.028283 | 55821905  | 55822941  | 55850414  | 5585090  |
| 76 NA19173 | [2515685 chr2 | 2 | 56563626  | 56567381  | 3756   | 2   | 3.706428  | 0.233074 | 56556559  | 56565577  | 56567035  | 56567721 |
| 77 NA19173 | [2515685 chr2 | 2 | 61675589  | 61676777  | 1189   | 2   | 1.055264  | 0.129773 | 61675200  | 61675979  | 61676468  | 6167708  |
| 78 NA19173 | [2515685 chr2 | 2 | 73921778  | 73948487  | 26710  | 43  | -0.37554  | 0.01901  | 73921335  | 73922222  | 73948060  | 73948911 |
| 79 NA19173 | [2515685 chr2 | 2 | 75296507  | 75298934  | 2428   | 2   | 0.900694  | 0.104647 | 75296056  | 75296959  | 75298532  | 75299331 |
| 80 NA19173 | [2515685 chr2 | 2 | 91101662  | 91107015  | 5354   | 2   | 0.572268  | 0.09664  | 91101386  | 91101938  | 91106590  | 91107441 |
| 81 NA19173 | [2515685 chr2 | 2 | 97184386  | 97189733  | 5348   | 2   | -0.715815 | 0.110476 | 97182781  | 97185992  | 97186782  | 9719672  |
| 82 NA19173 | [2515685 chr2 | 2 | 97613796  | 97614932  | 1137   | 2   | 1.462059  | 0.129811 | 97613553  | 97614040  | 97614467  | 97615391 |

|             |               |   |           |           |        |     |           |          |           |           |           |          |
|-------------|---------------|---|-----------|-----------|--------|-----|-----------|----------|-----------|-----------|-----------|----------|
| 83 NA19173  | [2515685 chr2 | 2 | 110590037 | 110632991 | 42955  | 39  | 0.251022  | 0.022373 | 110589893 | 110590182 | 110632491 | 11063349 |
| 84 NA19173  | [2515685 chr2 | 2 | 126159437 | 126168349 | 8913   | 3   | -0.79605  | 0.087694 | 126158494 | 126160381 | 126168048 | 12616865 |
| 85 NA19173  | [2515685 chr2 | 2 | 130405124 | 130450259 | 45136  | 45  | -0.289166 | 0.015277 | 130405077 | 130405172 | 130449916 | 13045060 |
| 86 NA19173  | [2515685 chr2 | 2 | 130454948 | 130483921 | 28974  | 38  | -0.289166 | 0.015277 | 130454772 | 130455124 | 130483518 | 13048432 |
| 87 NA19173  | [2515685 chr2 | 2 | 130498267 | 130502777 | 4511   | 10  | -0.329473 | 0.045823 | 130497934 | 130498600 | 130502508 | 13050304 |
| 88 NA19173  | [2515685 chr2 | 2 | 130582931 | 130592012 | 9082   | 20  | -0.260709 | 0.032289 | 130582683 | 130583180 | 130591359 | 13059266 |
| 89 NA19173  | [2515685 chr2 | 2 | 130884280 | 130893869 | 9590   | 19  | -0.261992 | 0.032653 | 130883963 | 130884597 | 130893858 | 13089388 |
| 90 NA19173  | [2515685 chr2 | 2 | 130970279 | 130978018 | 7740   | 16  | -0.300194 | 0.035319 | 130969160 | 130971399 | 130977852 | 13097818 |
| 91 NA19173  | [2515685 chr2 | 2 | 131292750 | 131296673 | 3924   | 10  | -0.274335 | 0.043279 | 131292739 | 131292762 | 131295579 | 13129676 |
| 92 NA19173  | [2515685 chr2 | 2 | 131354089 | 131356435 | 2347   | 2   | -0.707495 | 0.117508 | 131353875 | 131354304 | 131355250 | 13135762 |
| 93 NA19173  | [2515685 chr2 | 2 | 131765083 | 131784546 | 19464  | 30  | -0.372692 | 0.02654  | 131749458 | 131768034 | 131783971 | 13178512 |
| 94 NA19173  | [2515685 chr2 | 2 | 131814598 | 131821770 | 7173   | 18  | -0.304474 | 0.034862 | 131814439 | 131814758 | 131821605 | 13182193 |
| 95 NA19173  | [2515685 chr2 | 2 | 131899666 | 131908220 | 8555   | 14  | -0.317    | 0.038016 | 131899373 | 131899960 | 131908037 | 13190840 |
| 96 NA19173  | [2515685 chr2 | 2 | 131918222 | 131952657 | 34436  | 46  | -0.311781 | 0.021982 | 131918096 | 131918348 | 131952315 | 13195299 |
| 97 NA19173  | [2515685 chr2 | 2 | 132146137 | 132321004 | 174868 | 201 | -0.275623 | 0.01038  | 132145137 | 132147138 | 132320761 | 13232124 |
| 98 NA19173  | [2515685 chr2 | 2 | 132332382 | 132335366 | 2985   | 2   | -0.62145  | 0.114382 | 132331267 | 132333497 | 132335122 | 13233561 |
| 99 NA19173  | [2515685 chr2 | 2 | 146694147 | 146710744 | 16598  | 17  | 0.768295  | 0.040594 | 146688620 | 146697098 | 146710557 | 14671093 |
| 100 NA19173 | [2515685 chr2 | 2 | 153622711 | 153625256 | 2546   | 3   | 0.873018  | 0.091466 | 153621175 | 153624247 | 153625088 | 15362542 |
| 101 NA19173 | [2515685 chr2 | 2 | 203121095 | 203138582 | 17488  | 19  | -0.816867 | 0.039153 | 203120801 | 203121389 | 203138142 | 20313902 |
| 102 NA19173 | [2515685 chr2 | 2 | 208176479 | 208184457 | 7979   | 7   | 0.796181  | 0.060325 | 208176093 | 208176865 | 208183930 | 20818498 |
| 103 NA19173 | [2515685 chr2 | 2 | 228717927 | 228730812 | 12886  | 3   | -0.675187 | 0.082077 | 228715615 | 228720239 | 228730139 | 22873148 |
| 104 NA19173 | [2515685 chr3 | 3 | 204650    | 209394    | 4745   | 4   | 0.756548  | 0.074002 | 202918    | 206383    | 209009    | 209779   |
| 105 NA19173 | [2515685 chr3 | 3 | 1757211   | 1765702   | 8492   | 2   | 0.811866  | 0.118217 | 1756096   | 1758327   | 1762058   | 179730   |
| 106 NA19173 | [2515685 chr3 | 3 | 46770617  | 46825913  | 55297  | 13  | -0.686974 | 0.042376 | 46770172  | 46771063  | 46825497  | 46826331 |
| 107 NA19173 | [2515685 chr3 | 3 | 68821474  | 68830847  | 9374   | 17  | -1.731259 | 0.052065 | 68818894  | 68824055  | 68830417  | 6883127  |
| 108 NA19173 | [2515685 chr3 | 3 | 75777160  | 75792949  | 15790  | 11  | -0.262914 | 0.04533  | 75774086  | 75780235  | 75791214  | 7579468  |
| 109 NA19173 | [2515685 chr3 | 3 | 75847165  | 75879749  | 32585  | 20  | -0.495419 | 0.031405 | 75845474  | 75848856  | 75876105  | 75891771 |
| 110 NA19173 | [2515685 chr3 | 3 | 82951524  | 82955577  | 4054   | 7   | -0.771838 | 0.062952 | 82951325  | 82951723  | 82955245  | 8295590  |
| 111 NA19173 | [2515685 chr3 | 3 | 109186593 | 109189513 | 2921   | 3   | -0.5113   | 0.087222 | 109185785 | 109187401 | 109189157 | 10918986 |
| 112 NA19173 | [2515685 chr3 | 3 | 127155218 | 127160767 | 5550   | 8   | -0.379637 | 0.053172 | 127155047 | 127155390 | 127160217 | 12716131 |
| 113 NA19173 | [2515685 chr3 | 3 | 139287057 | 139289507 | 2451   | 3   | 0.797416  | 0.101007 | 139286041 | 139288073 | 139289200 | 13928981 |
| 114 NA19173 | [2515685 chr3 | 3 | 163994592 | 164106273 | 111682 | 104 | 2.504209  | 0.025414 | 163993392 | 163995793 | 164106029 | 16410651 |
| 115 NA19173 | [2515685 chr3 | 3 | 164106273 | 164108502 | 2230   | 2   | 0.667483  | 0.111828 | 164106029 | 164106517 | 164108018 | 16410898 |
| 116 NA19173 | [2515685 chr3 | 3 | 164200660 | 164205886 | 5227   | 5   | -0.792281 | 0.079772 | 164200187 | 164200133 | 164204674 | 16420709 |
| 117 NA19173 | [2515685 chr3 | 3 | 176561952 | 176567506 | 5555   | 5   | -0.836884 | 0.076049 | 176560250 | 176563654 | 176565991 | 17656902 |
| 118 NA19173 | [2515685 chr3 | 3 | 191219813 | 191223326 | 3514   | 4   | 0.736342  | 0.076918 | 191219291 | 191220336 | 191222918 | 19122373 |
| 119 NA19173 | [2515685 chr3 | 3 | 194357854 | 194368035 | 10182  | 12  | 2.037654  | 0.066713 | 194357665 | 194358044 | 194367817 | 19436825 |
| 120 NA19173 | [2515685 chr3 | 3 | 196919379 | 196931952 | 12574  | 12  | -0.362998 | 0.043787 | 196917841 | 196920917 | 196931464 | 19693244 |
| 121 NA19173 | [2515685 chr3 | 3 | 196994475 | 197002965 | 8491   | 10  | 0.439802  | 0.045471 | 196994054 | 196994896 | 197002044 | 19700388 |
| 122 NA19173 | [2515685 chr3 | 3 | 197267244 | 197268267 | 1024   | 2   | -0.534959 | 0.106005 | 197267046 | 197267442 | 197267957 | 19726857 |
| 123 NA19173 | [2515685 chr3 | 3 | 198422794 | 198427408 | 4615   | 2   | 0.784811  | 0.126219 | 198422381 | 198423207 | 198423959 | 19843085 |
| 124 NA19173 | [2515685 chr3 | 3 | 198674426 | 198676338 | 1913   | 7   | 0.441863  | 0.047017 | 198674161 | 198674692 | 198676038 | 19867663 |
| 125 NA19173 | [2515685 chr3 | 3 | 199313925 | 199321063 | 7139   | 15  | 1.130344  | 0.035712 | 199313515 | 199314336 | 199320844 | 19932128 |
| 126 NA19173 | [2515685 chr3 | 3 | 199383185 | 199384627 | 1443   | 5   | -0.347758 | 0.066985 | 199382863 | 199383507 | 199384512 | 19938474 |
| 127 NA19173 | [2515685 chr4 | 4 | 8740725   | 8758954   | 18230  | 27  | 0.25828   | 0.02399  | 8740586   | 8740864   | 8758558   | 875935   |
| 128 NA19173 | [2515685 chr4 | 4 | 8998176   | 9046719   | 48544  | 87  | 1.593708  | 0.013583 | 8850774   | 9001243   | 9046129   | 904730   |
| 129 NA19173 | [2515685 chr4 | 4 | 9119142   | 9137208   | 18067  | 11  | 0.352703  | 0.044518 | 9118875   | 9119410   | 9136839   | 913757   |
| 130 NA19173 | [2515685 chr4 | 4 | 9812346   | 9813108   | 763    | 33  | 2.535276  | 0.028144 | 9812284   | 9812408   | 9812952   | 981326   |
| 131 NA19173 | [2515685 chr4 | 4 | 9887220   | 9911397   | 24178  | 31  | 1.761374  | 0.040994 | 9886886   | 9887555   | 9910388   | 991240   |
| 132 NA19173 | [2515685 chr4 | 4 | 11342986  | 11347570  | 4585   | 6   | -0.988398 | 0.067721 | 11342619  | 11343353  | 11346471  | 1134866  |
| 133 NA19173 | [2515685 chr4 | 4 | 15435307  | 15447669  | 12363  | 4   | -0.767209 | 0.072651 | 15433880  | 15436734  | 15444602  | 1549447  |
| 134 NA19173 | [2515685 chr4 | 4 | 28984406  | 28986098  | 1693   | 2   | -0.545872 | 0.102027 | 28984127  | 28984686  | 28985739  | 2898645  |
| 135 NA19173 | [2515685 chr4 | 4 | 34602797  | 34650994  | 48198  | 45  | 0.783321  | 0.023548 | 34601994  | 34603600  | 34649535  | 3465245  |
| 136 NA19173 | [2515685 chr4 | 4 | 49121744  | 49361409  | 239666 | 281 | 0.255693  | 0.007992 | 49121741  | 49121747  | 493639431 | 4936338  |
| 137 NA19173 | [2515685 chr4 | 4 | 69202095  | 69319814  | 117720 | 72  | 1.063874  | 0.02284  | 69201955  | 69202236  | 69319569  | 6932005  |

|             |               |   |           |           |        |     |           |          |           |           |           |          |
|-------------|---------------|---|-----------|-----------|--------|-----|-----------|----------|-----------|-----------|-----------|----------|
| 138 NA19173 | [2515685 chr4 | 4 | 69319814  | 69368479  | 48666  | 45  | 0.312493  | 0.019505 | 69319569  | 69320059  | 69365412  | 6938219  |
| 139 NA19173 | [2515685 chr4 | 4 | 69672033  | 69720489  | 48457  | 53  | 0.298899  | 0.018542 | 69671975  | 69672092  | 69717422  | 6973421  |
| 140 NA19173 | [2515685 chr4 | 4 | 70299503  | 70418275  | 118773 | 114 | 0.405324  | 0.014202 | 70299268  | 70299739  | 70418083  | 7041846  |
| 141 NA19173 | [2515685 chr4 | 4 | 115534209 | 115541546 | 7338   | 9   | 0.821632  | 0.053859 | 115530015 | 115537276 | 115539984 | 11554310 |
| 142 NA19173 | [2515685 chr4 | 4 | 125304905 | 125305983 | 1079   | 2   | 0.618331  | 0.112322 | 125304587 | 125305223 | 125305732 | 12530623 |
| 143 NA19173 | [2515685 chr4 | 4 | 132792389 | 132794214 | 1826   | 2   | 0.548764  | 0.104845 | 132791879 | 132792900 | 132794021 | 13279440 |
| 144 NA19173 | [2515685 chr4 | 4 | 133536191 | 133540723 | 4533   | 3   | -2.545002 | 0.169043 | 133531398 | 133539258 | 133540462 | 13354098 |
| 145 NA19173 | [2515685 chr4 | 4 | 138537751 | 138549906 | 12156  | 14  | 0.876208  | 0.045497 | 138537443 | 138538059 | 138547414 | 13855239 |
| 146 NA19173 | [2515685 chr4 | 4 | 145240980 | 145245588 | 4609   | 4   | -0.440732 | 0.075903 | 145240473 | 145241488 | 145245192 | 14524598 |
| 147 NA19173 | [2515685 chr4 | 4 | 162806038 | 162809269 | 3232   | 3   | 0.826454  | 0.089142 | 162804872 | 162807204 | 162808734 | 16280980 |
| 148 NA19173 | [2515685 chr4 | 4 | 166012113 | 166016848 | 4736   | 2   | -0.768417 | 0.09673  | 166011431 | 166012796 | 166013781 | 16608193 |
| 149 NA19173 | [2515685 chr4 | 4 | 169184442 | 169368370 | 183929 | 161 | 0.767171  | 0.012138 | 169184090 | 169184794 | 169366713 | 16937002 |
| 150 NA19173 | [2515685 chr4 | 4 | 171642247 | 171648886 | 6640   | 8   | -0.772402 | 0.055984 | 171642071 | 171642424 | 171648210 | 17164956 |
| 151 NA19173 | [2515685 chr4 | 4 | 172750241 | 172755216 | 4976   | 2   | 0.83576   | 0.119051 | 172748887 | 172751596 | 172753256 | 17275717 |
| 152 NA19173 | [2515685 chr4 | 4 | 173363594 | 173367718 | 4125   | 6   | -0.755696 | 0.063863 | 173362583 | 173364606 | 173367283 | 17336815 |
| 153 NA19173 | [2515685 chr4 | 4 | 173799832 | 173807322 | 7491   | 6   | -2.634933 | 0.114024 | 173799464 | 173800201 | 173804255 | 17381134 |
| 154 NA19173 | [2515685 chr4 | 4 | 178967213 | 178988374 | 21162  | 19  | -0.820495 | 0.038636 | 178965065 | 178969361 | 178985307 | 17899157 |
| 155 NA19173 | [2515685 chr4 | 4 | 185532106 | 185544849 | 12744  | 13  | 0.770044  | 0.043318 | 185531516 | 185532696 | 185543276 | 18554642 |
| 156 NA19173 | [2515685 chr4 | 4 | 186816666 | 186819359 | 2694   | 4   | 3.338224  | 0.160389 | 186816420 | 186816912 | 186819049 | 18681967 |
| 157 NA19173 | [2515685 chr4 | 4 | 187728494 | 187732907 | 4414   | 15  | 1.547123  | 0.048548 | 187728193 | 187728795 | 187732541 | 18773327 |
| 158 NA19173 | [2515685 chr4 | 4 | 188255523 | 188269680 | 14158  | 235 | 0.94312   | 0.009503 | 188255215 | 188255831 | 188269403 | 18826995 |
| 159 NA19173 | [2515685 chr4 | 4 | 189799455 | 189806541 | 7087   | 10  | -0.417716 | 0.04381  | 189799180 | 189799730 | 189806018 | 18980706 |
| 160 NA19173 | [2515685 chr4 | 4 | 190528602 | 190533163 | 4562   | 21  | -2.737487 | 0.049108 | 190528058 | 190529146 | 190531664 | 19053466 |
| 161 NA19173 | [2515685 chr4 | 4 | 190767346 | 190773178 | 5833   | 5   | -0.644145 | 0.070316 | 190765430 | 190769263 | 190772764 | 19077359 |
| 162 NA19173 | [2515685 chr5 | 5 | 810517    | 820048    | 9532   | 12  | 0.407402  | 0.047296 | 809997    | 811038    | 819824    | 820272   |
| 163 NA19173 | [2515685 chr5 | 5 | 950181    | 953016    | 2836   | 12  | -0.411266 | 0.034801 | 949756    | 950607    | 952851    | 953182   |
| 164 NA19173 | [2515685 chr5 | 5 | 1001197   | 1003915   | 2719   | 2   | 0.497349  | 0.096592 | 1000851   | 1001544   | 1002644   | 100518   |
| 165 NA19173 | [2515685 chr5 | 5 | 1075284   | 1079920   | 4637   | 24  | 0.696323  | 0.026851 | 1074709   | 1075859   | 1079566   | 108027   |
| 166 NA19173 | [2515685 chr5 | 5 | 1122995   | 1126517   | 3523   | 38  | 0.35787   | 0.021415 | 1122772   | 1123219   | 1126389   | 112664   |
| 167 NA19173 | [2515685 chr5 | 5 | 1223248   | 1223930   | 683    | 5   | 0.629491  | 0.053914 | 1223057   | 1223439   | 1223854   | 122400   |
| 168 NA19173 | [2515685 chr5 | 5 | 13204232  | 13207697  | 3466   | 2   | -0.624998 | 0.123326 | 13204049  | 13204416  | 13207442  | 1320795  |
| 169 NA19173 | [2515685 chr5 | 5 | 19410747  | 19412172  | 1426   | 3   | -2.112966 | 0.130679 | 19410189  | 19411305  | 19411980  | 1941236  |
| 170 NA19173 | [2515685 chr5 | 5 | 26831997  | 26836459  | 4463   | 4   | -2.01134  | 0.101201 | 26829858  | 26834136  | 26835932  | 2683698  |
| 171 NA19173 | [2515685 chr5 | 5 | 68865200  | 68939318  | 74119  | 133 | 0.303591  | 0.012306 | 68864770  | 68865630  | 68939084  | 6893955  |
| 172 NA19173 | [2515685 chr5 | 5 | 69404835  | 69411352  | 6518   | 6   | 0.55934   | 0.052476 | 69404157  | 69405513  | 69410702  | 6941200  |
| 173 NA19173 | [2515685 chr5 | 5 | 69741138  | 69742254  | 1117   | 2   | 0.853345  | 0.096637 | 69740930  | 69741346  | 69741639  | 6974287  |
| 174 NA19173 | [2515685 chr5 | 5 | 70280260  | 70286789  | 6530   | 6   | 0.533455  | 0.051983 | 70279582  | 70280938  | 70286122  | 7028745  |
| 175 NA19173 | [2515685 chr5 | 5 | 70338692  | 70426554  | 87863  | 148 | 0.311011  | 0.01168  | 70338530  | 70338855  | 70425419  | 7042768  |
| 176 NA19173 | [2515685 chr5 | 5 | 79992681  | 79997936  | 5256   | 6   | 0.35023   | 0.066511 | 79992202  | 79993161  | 79997445  | 7999842  |
| 177 NA19173 | [2515685 chr5 | 5 | 81459212  | 81466056  | 6845   | 2   | -1.263532 | 0.116633 | 81455614  | 81462405  | 81462863  | 8147028  |
| 178 NA19173 | [2515685 chr5 | 5 | 93928460  | 93933101  | 4642   | 4   | -0.46682  | 0.084176 | 93927706  | 93929215  | 93931984  | 9393421  |
| 179 NA19173 | [2515685 chr5 | 5 | 97427204  | 97428665  | 1462   | 3   | 0.708291  | 0.098442 | 97426913  | 97427496  | 97428529  | 9742880  |
| 180 NA19173 | [2515685 chr5 | 5 | 99194149  | 99199849  | 5701   | 4   | -0.491848 | 0.077842 | 99192494  | 99195804  | 99198799  | 9920090  |
| 181 NA19173 | [2515685 chr5 | 5 | 99409393  | 99419037  | 9645   | 13  | -0.631289 | 0.041366 | 99408997  | 99409789  | 99418328  | 9941974  |
| 182 NA19173 | [2515685 chr5 | 5 | 109880391 | 109881914 | 1524   | 2   | 0.793256  | 0.11977  | 109879999 | 109880783 | 109881640 | 10988218 |
| 183 NA19173 | [2515685 chr5 | 5 | 137838768 | 137844134 | 5367   | 4   | 0.800453  | 0.083374 | 137838364 | 137839173 | 137843310 | 13784495 |
| 184 NA19173 | [2515685 chr5 | 5 | 140203081 | 140217091 | 14011  | 18  | 1.90506   | 0.055069 | 140202344 | 140203819 | 140216552 | 14021763 |
| 185 NA19173 | [2515685 chr5 | 5 | 140217091 | 140218928 | 1838   | 2   | 0.721236  | 0.105265 | 140216552 | 140217631 | 140218508 | 14021934 |
| 186 NA19173 | [2515685 chr5 | 5 | 150157909 | 150161837 | 3929   | 6   | -0.813617 | 0.066093 | 150157286 | 150158532 | 15016521  | 15016205 |
| 187 NA19173 | [2515685 chr5 | 5 | 150183322 | 150203801 | 20480  | 11  | -1.889078 | 0.061513 | 150181427 | 150185218 | 150203451 | 15020415 |
| 188 NA19173 | [2515685 chr5 | 5 | 165771312 | 165864059 | 92748  | 4   | -0.717384 | 0.077676 | 165771092 | 165771533 | 165860866 | 16594174 |
| 189 NA19173 | [2515685 chr5 | 5 | 175455737 | 175457428 | 1692   | 4   | -0.33718  | 0.065088 | 175455527 | 175455947 | 175457208 | 17545764 |
| 190 NA19173 | [2515685 chr5 | 5 | 180306298 | 180309823 | 3526   | 7   | -0.273006 | 0.051874 | 180305337 | 180307260 | 180309690 | 18030995 |
| 191 NA19173 | [2515685 chr5 | 5 | 180309823 | 180363417 | 53595  | 51  | -1.043136 | 0.025198 | 180309690 | 180309956 | 180363120 | 18036371 |
| 192 NA19173 | [2515685 chr5 | 5 | 180755027 | 180755638 | 612    | 2   | 0.604034  | 0.107559 | 180754474 | 180755581 | 180755581 | 18075569 |

|             |               |   |           |           |        |    |           |          |           |           |           |          |
|-------------|---------------|---|-----------|-----------|--------|----|-----------|----------|-----------|-----------|-----------|----------|
| 193 NA19173 | [2515685 chr5 | 5 | 180764561 | 180768629 | 4069   | 3  | 0.657899  | 0.103273 | 180763713 | 180765409 | 180765436 | 18077529 |
| 194 NA19173 | [2515685 chr6 | 6 | 32561866  | 32586862  | 24997  | 6  | -0.492857 | 0.094147 | 32560230  | 32563503  | 32586127  | 3258759  |
| 195 NA19173 | [2515685 chr6 | 6 | 32605125  | 32605958  | 834    | 2  | -0.65401  | 0.110935 | 32604923  | 32605328  | 32605760  | 32606151 |
| 196 NA19173 | [2515685 chr6 | 6 | 32610864  | 32617043  | 6180   | 2  | -0.493587 | 0.095516 | 32609832  | 32611897  | 32613543  | 3262657  |
| 197 NA19173 | [2515685 chr6 | 6 | 32653862  | 32655482  | 1621   | 3  | 0.739619  | 0.125102 | 32653679  | 32654046  | 32654980  | 3265598  |
| 198 NA19173 | [2515685 chr6 | 6 | 32666229  | 32667673  | 1445   | 3  | 0.512081  | 0.08604  | 32665899  | 32666560  | 32667507  | 3266783  |
| 199 NA19173 | [2515685 chr6 | 6 | 32702716  | 32705737  | 3022   | 3  | -0.50745  | 0.075348 | 32702285  | 32703148  | 32704019  | 3270745  |
| 200 NA19173 | [2515685 chr6 | 6 | 32735984  | 32736908  | 925    | 2  | 0.563993  | 0.112443 | 32735718  | 32736251  | 32736724  | 3273709  |
| 201 NA19173 | [2515685 chr6 | 6 | 32741849  | 32744343  | 2495   | 4  | 0.669624  | 0.080299 | 32741631  | 32742067  | 32744136  | 3274455  |
| 202 NA19173 | [2515685 chr6 | 6 | 35604364  | 35674095  | 69732  | 61 | 0.466077  | 0.019326 | 35603481  | 35605248  | 35673825  | 3567436  |
| 203 NA19173 | [2515685 chr6 | 6 | 35862833  | 35874426  | 11594  | 13 | 0.742103  | 0.042593 | 35862530  | 35863136  | 35873957  | 3587489  |
| 204 NA19173 | [2515685 chr6 | 6 | 52900994  | 52904796  | 3803   | 6  | -0.595663 | 0.064091 | 52900786  | 52901202  | 52904081  | 5290551  |
| 205 NA19173 | [2515685 chr6 | 6 | 54036900  | 54042384  | 5485   | 5  | 3.063205  | 0.125245 | 54036573  | 54037227  | 54041771  | 5404299  |
| 206 NA19173 | [2515685 chr6 | 6 | 75615700  | 75616876  | 1177   | 2  | -0.645973 | 0.117886 | 75615505  | 75615895  | 75616682  | 7561707  |
| 207 NA19173 | [2515685 chr6 | 6 | 79023318  | 79093263  | 69946  | 70 | 0.725213  | 0.019144 | 79022028  | 79024609  | 79091909  | 7909461  |
| 208 NA19173 | [2515685 chr6 | 6 | 84801992  | 84804976  | 2985   | 3  | 0.527442  | 0.09506  | 84801686  | 84802299  | 84804690  | 8480526  |
| 209 NA19173 | [2515685 chr6 | 6 | 103844685 | 103871201 | 26517  | 17 | 1.950058  | 0.063583 | 103844347 | 103845023 | 103868241 | 10387416 |
| 210 NA19173 | [2515685 chr6 | 6 | 115446833 | 115450846 | 4014   | 3  | -0.650099 | 0.091326 | 115446601 | 115447066 | 115450464 | 11545122 |
| 211 NA19173 | [2515685 chr6 | 6 | 120671191 | 120671916 | 726    | 2  | 0.853866  | 0.116076 | 120670696 | 120671686 | 120671725 | 12067210 |
| 212 NA19173 | [2515685 chr6 | 6 | 154800038 | 154817789 | 17752  | 16 | -0.803581 | 0.040223 | 154799451 | 154800626 | 154816733 | 15481884 |
| 213 NA19173 | [2515685 chr6 | 6 | 158626779 | 158629334 | 2556   | 2  | 0.588867  | 0.1107   | 158626116 | 158627443 | 158629136 | 15862953 |
| 214 NA19173 | [2515685 chr6 | 6 | 161003739 | 161038394 | 34656  | 60 | 0.433184  | 0.015926 | 161003541 | 161003937 | 161038184 | 16103860 |
| 215 NA19173 | [2515685 chr6 | 6 | 162467598 | 162477003 | 9406   | 7  | -0.795253 | 0.061609 | 162467067 | 162468130 | 162476571 | 16247743 |
| 216 NA19173 | [2515685 chr6 | 6 | 168780035 | 168781989 | 1955   | 4  | -1.000762 | 0.076718 | 168779504 | 168780567 | 168781555 | 16878242 |
| 217 NA19173 | [2515685 chr6 | 6 | 170603879 | 170604666 | 788    | 2  | -1.785019 | 0.132599 | 170603541 | 170604217 | 170604339 | 17060499 |
| 218 NA19173 | [2515685 chr6 | 6 | 170625506 | 170627028 | 1523   | 3  | 0.544848  | 0.090972 | 170625015 | 170625997 | 170626579 | 17062747 |
| 219 NA19173 | [2515685 chr6 | 6 | 170684555 | 170686252 | 1698   | 4  | -0.810739 | 0.080229 | 170684170 | 170684940 | 170686034 | 17068647 |
| 220 NA19173 | [2515685 chr6 | 6 | 170692529 | 170695455 | 2927   | 14 | 0.302944  | 0.038797 | 170692183 | 170692876 | 170695068 | 17069584 |
| 221 NA19173 | [2515685 chr6 | 6 | 170720829 | 170723478 | 2650   | 11 | -0.560854 | 0.046683 | 170720441 | 170721218 | 170723334 | 17072362 |
| 222 NA19173 | [2515685 chr6 | 6 | 170897669 | 170898280 | 612    | 2  | 0.604034  | 0.107559 | 170897116 | 170898223 | 170898223 | 17089833 |
| 223 NA19173 | [2515685 chr6 | 6 | 170907234 | 170911604 | 4371   | 3  | 0.657899  | 0.103273 | 170906392 | 170908077 | 170908104 | 17091795 |
| 224 NA19173 | [2515685 chr7 | 7 | 113212    | 116416    | 3205   | 14 | -0.371484 | 0.042571 | 113146    | 113279    | 116290    | 116543   |
| 225 NA19173 | [2515685 chr7 | 7 | 928371    | 930663    | 2293   | 6  | 0.393703  | 0.056796 | 928117    | 928626    | 930382    | 930945   |
| 226 NA19173 | [2515685 chr7 | 7 | 3384111   | 3392457   | 8347   | 8  | 0.809269  | 0.055785 | 3383451   | 3384772   | 3390107   | 339561   |
| 227 NA19173 | [2515685 chr7 | 7 | 12297894  | 12299052  | 1159   | 6  | 0.397523  | 0.071634 | 12297829  | 12297960  | 12298811  | 1229929  |
| 228 NA19173 | [2515685 chr7 | 7 | 15002967  | 15009839  | 6873   | 3  | -0.418269 | 0.082411 | 15002468  | 15003467  | 15009610  | 1501006  |
| 229 NA19173 | [2515685 chr7 | 7 | 19392309  | 19403725  | 11417  | 6  | -0.375832 | 0.060485 | 19392086  | 19392532  | 19401375  | 1945566  |
| 230 NA19173 | [2515685 chr7 | 7 | 37647977  | 37657849  | 9873   | 2  | -0.544542 | 0.085245 | 37646226  | 37649728  | 37655499  | 3771960  |
| 231 NA19173 | [2515685 chr7 | 7 | 38159778  | 38178711  | 18934  | 20 | -0.28593  | 0.030883 | 38159476  | 38160081  | 38177987  | 3817943  |
| 232 NA19173 | [2515685 chr7 | 7 | 43775620  | 43792507  | 16888  | 20 | 0.357342  | 0.031168 | 43775434  | 43775807  | 43792292  | 4379272  |
| 233 NA19173 | [2515685 chr7 | 7 | 46709845  | 46810040  | 100196 | 2  | -0.542733 | 0.106978 | 46675289  | 46712195  | 46807690  | 4687091  |
| 234 NA19173 | [2515685 chr7 | 7 | 56652639  | 56670462  | 17824  | 14 | 0.469144  | 0.035859 | 56652228  | 56653051  | 56670409  | 5667051  |
| 235 NA19173 | [2515685 chr7 | 7 | 62116535  | 62117881  | 1347   | 3  | -0.430869 | 0.078099 | 62116347  | 62116724  | 62117188  | 6211857  |
| 236 NA19173 | [2515685 chr7 | 7 | 62651575  | 62670113  | 18539  | 9  | 0.435924  | 0.041187 | 62650114  | 62653036  | 62667763  | 6267326  |
| 237 NA19173 | [2515685 chr7 | 7 | 63995985  | 64010720  | 14736  | 18 | 0.280394  | 0.03601  | 63995674  | 63996294  | 64010307  | 6401113  |
| 238 NA19173 | [2515685 chr7 | 7 | 64028465  | 64045487  | 17023  | 47 | -0.251378 | 0.020797 | 64027806  | 64029125  | 64045069  | 6404590  |
| 239 NA19173 | [2515685 chr7 | 7 | 64168346  | 64170655  | 2310   | 2  | -0.696086 | 0.097488 | 64166309  | 64170383  | 64170649  | 6417066  |
| 240 NA19173 | [2515685 chr7 | 7 | 64464087  | 64481591  | 17505  | 46 | -0.255882 | 0.020795 | 64463669  | 64464506  | 64481417  | 6448176  |
| 241 NA19173 | [2515685 chr7 | 7 | 64538610  | 64556662  | 18053  | 48 | -0.262023 | 0.020373 | 64537873  | 64539348  | 64556244  | 6455708  |
| 242 NA19173 | [2515685 chr7 | 7 | 64691204  | 64722046  | 30843  | 33 | 0.437668  | 0.024505 | 64690582  | 64691826  | 64721805  | 6472228  |
| 243 NA19173 | [2515685 chr7 | 7 | 69866390  | 69869623  | 3234   | 4  | 0.81997   | 0.084686 | 69865412  | 69867368  | 69869269  | 6986997  |
| 244 NA19173 | [2515685 chr7 | 7 | 69869623  | 69871056  | 1434   | 2  | 3.531591  | 0.177998 | 69869269  | 69869978  | 69870420  | 6987169  |
| 245 NA19173 | [2515685 chr7 | 7 | 73965656  | 73966691  | 1036   | 4  | 0.340072  | 0.066326 | 73965279  | 73966033  | 73966513  | 7396687  |
| 246 NA19173 | [2515685 chr7 | 7 | 76173835  | 76175647  | 1813   | 2  | 1.002363  | 0.10918  | 76173564  | 76174106  | 76174852  | 7617644  |
| 247 NA19173 | [2515685 chr7 | 7 | 78448980  | 78498649  | 49670  | 53 | -0.766774 | 0.021781 | 78448496  | 78449465  | 78498134  | 7849916  |

|             |               |   |           |           |        |     |           |          |           |           |           |          |
|-------------|---------------|---|-----------|-----------|--------|-----|-----------|----------|-----------|-----------|-----------|----------|
| 248 NA19173 | [2515685 chr7 | 7 | 86308899  | 86326435  | 17537  | 6   | 0.294456  | 0.051869 | 86308663  | 86309136  | 86325771  | 8632709! |
| 249 NA19173 | [2515685 chr7 | 7 | 89455106  | 89456632  | 1527   | 3   | 2.952355  | 0.1292   | 89454839  | 89455373  | 89456225  | 8945703! |
| 250 NA19173 | [2515685 chr7 | 7 | 101275493 | 101277996 | 2504   | 3   | 0.806668  | 0.073679 | 101274930 | 101276056 | 101277293 | 10127870 |
| 251 NA19173 | [2515685 chr7 | 7 | 101731796 | 101734453 | 2658   | 3   | 0.585471  | 0.077299 | 101731584 | 101732009 | 101733827 | 10173507 |
| 252 NA19173 | [2515685 chr7 | 7 | 101752166 | 101759251 | 7086   | 10  | 0.503663  | 0.04024  | 101751400 | 101752933 | 101759229 | 10175927 |
| 253 NA19173 | [2515685 chr7 | 7 | 101799866 | 101805548 | 5683   | 6   | 0.454256  | 0.049619 | 101797840 | 101801892 | 101804682 | 10180641 |
| 254 NA19173 | [2515685 chr7 | 7 | 101831025 | 101833681 | 2657   | 3   | 0.585471  | 0.077299 | 101830813 | 101831238 | 101833055 | 10183430 |
| 255 NA19173 | [2515685 chr7 | 7 | 101851360 | 101858816 | 7457   | 10  | 0.503663  | 0.04024  | 101850594 | 101852127 | 101858540 | 10185909 |
| 256 NA19173 | [2515685 chr7 | 7 | 101899083 | 101904759 | 5677   | 6   | 0.454256  | 0.049619 | 101897065 | 101901102 | 101903893 | 10190562 |
| 257 NA19173 | [2515685 chr7 | 7 | 109034784 | 109048749 | 13966  | 10  | 2.206193  | 0.070418 | 109024063 | 109037134 | 109046953 | 10905054 |
| 258 NA19173 | [2515685 chr7 | 7 | 109776378 | 109782655 | 6278   | 5   | 0.783931  | 0.072764 | 109775821 | 109776936 | 109782301 | 10978301 |
| 259 NA19173 | [2515685 chr7 | 7 | 110843822 | 110850326 | 6505   | 4   | -0.720736 | 0.094676 | 110842210 | 110845435 | 110849434 | 11085121 |
| 260 NA19173 | [2515685 chr7 | 7 | 118747553 | 118757346 | 9794   | 14  | -0.775556 | 0.044599 | 118746829 | 118748237 | 118756302 | 11875839 |
| 261 NA19173 | [2515685 chr7 | 7 | 125639507 | 125644775 | 5269   | 6   | -0.78082  | 0.074138 | 125639054 | 125639961 | 125644046 | 12564550 |
| 262 NA19173 | [2515685 chr7 | 7 | 133243381 | 133245202 | 1822   | 2   | 0.608796  | 0.101778 | 133243008 | 133243755 | 133244207 | 13324619 |
| 263 NA19173 | [2515685 chr7 | 7 | 133245202 | 133257359 | 12158  | 13  | 2.6614    | 0.07231  | 133244207 | 133246197 | 133255009 | 13326093 |
| 264 NA19173 | [2515685 chr7 | 7 | 139646447 | 139656780 | 10334  | 9   | -0.754269 | 0.054203 | 139646220 | 139646674 | 139655248 | 13965831 |
| 265 NA19173 | [2515685 chr7 | 7 | 141239940 | 141241109 | 1170   | 2   | 0.654929  | 0.103011 | 141239521 | 141240359 | 141240873 | 14124134 |
| 266 NA19173 | [2515685 chr7 | 7 | 141760008 | 141761893 | 1886   | 2   | -0.599464 | 0.116795 | 141759690 | 141760326 | 141761589 | 14176219 |
| 267 NA19173 | [2515685 chr7 | 7 | 141859547 | 141861635 | 2089   | 3   | -0.477741 | 0.078312 | 141859116 | 141859979 | 141861094 | 14186217 |
| 268 NA19173 | [2515685 chr7 | 7 | 143320629 | 143511719 | 191091 | 363 | -0.405285 | 0.007418 | 143320373 | 143320886 | 143511270 | 14351216 |
| 269 NA19173 | [2515685 chr7 | 7 | 143740544 | 143743194 | 2651   | 3   | -0.435112 | 0.076536 | 143740103 | 143740985 | 143742979 | 14374341 |
| 270 NA19173 | [2515685 chr7 | 7 | 156976112 | 156978464 | 2353   | 2   | 0.747416  | 0.097885 | 156975812 | 156976413 | 156977896 | 15697903 |
| 271 NA19173 | [2515685 chr7 | 7 | 157023614 | 157027930 | 4317   | 7   | 0.401479  | 0.054461 | 157023242 | 157023987 | 157027451 | 15702840 |
| 272 NA19173 | [2515685 chr7 | 7 | 158207288 | 158209880 | 2593   | 2   | 1.102883  | 0.135749 | 158206344 | 158208233 | 158209333 | 15821042 |
| 273 NA19173 | [2515685 chr7 | 7 | 158617060 | 158624378 | 7319   | 6   | 0.856131  | 0.067242 | 158616763 | 158617357 | 158622028 | 15862672 |
| 274 NA19173 | [2515685 chr8 | 8 | 64034     | 67656     | 3623   | 3   | 0.6579    | 0.103274 | 56939     | 66788     | 66815     | 68497    |
| 275 NA19173 | [2515685 chr8 | 8 | 76554     | 77165     | 612    | 2   | 0.604034  | 0.107559 | 76497     | 76612     | 76612     | 77719    |
| 276 NA19173 | [2515685 chr8 | 8 | 1328256   | 1343509   | 15254  | 45  | -0.6665   | 0.019909 | 1327688   | 1328824   | 1342795   | 134422   |
| 277 NA19173 | [2515685 chr8 | 8 | 1371706   | 1374029   | 2324   | 2   | 0.660851  | 0.112847 | 1370378   | 1373035   | 1373615   | 137444   |
| 278 NA19173 | [2515685 chr8 | 8 | 2233414   | 2253793   | 20380  | 11  | -0.656057 | 0.047092 | 2232990   | 2233839   | 2251039   | 225752   |
| 279 NA19173 | [2515685 chr8 | 8 | 4110204   | 4112526   | 2323   | 2   | 3.451788  | 0.218258 | 4109692   | 4110717   | 4112031   | 411302   |
| 280 NA19173 | [2515685 chr8 | 8 | 5582875   | 5594011   | 11137  | 9   | 0.739538  | 0.048562 | 5582615   | 5583135   | 5592820   | 559520   |
| 281 NA19173 | [2515685 chr8 | 8 | 5951254   | 5993685   | 42432  | 3   | 0.419445  | 0.081542 | 5949893   | 5952616   | 5990931   | 600372   |
| 282 NA19173 | [2515685 chr8 | 8 | 7098713   | 7187950   | 89238  | 290 | 0.411827  | 0.007918 | 7098285   | 7099142   | 7187698   | 718820   |
| 283 NA19173 | [2515685 chr8 | 8 | 7223627   | 7391234   | 167608 | 254 | -0.276472 | 0.009162 | 7223006   | 7224249   | 7391061   | 739140   |
| 284 NA19173 | [2515685 chr8 | 8 | 7391234   | 7430731   | 39498  | 164 | 0.3777    | 0.005504 | 7391061   | 7391407   | 7430300   | 743116   |
| 285 NA19173 | [2515685 chr8 | 8 | 7607253   | 7669670   | 62418  | 278 | 0.3777    | 0.005504 | 7606824   | 7607682   | 7669496   | 766984   |
| 286 NA19173 | [2515685 chr8 | 8 | 7669670   | 7828144   | 158475 | 251 | -0.284501 | 0.009261 | 7669496   | 7669844   | 7827558   | 782873   |
| 287 NA19173 | [2515685 chr8 | 8 | 7862281   | 7873897   | 11617  | 34  | 1.385347  | 0.028436 | 7862030   | 7862533   | 7873605   | 787419   |
| 288 NA19173 | [2515685 chr8 | 8 | 7903980   | 7928723   | 24744  | 96  | 0.417261  | 0.013265 | 7903568   | 7904392   | 7928292   | 792915   |
| 289 NA19173 | [2515685 chr8 | 8 | 12023134  | 12035286  | 12153  | 32  | 1.412888  | 0.030534 | 12022997  | 12023272  | 12034973  | 1203559  |
| 290 NA19173 | [2515685 chr8 | 8 | 12064826  | 12072445  | 7620   | 25  | 0.453542  | 0.026408 | 12064663  | 12064989  | 12072267  | 1207262  |
| 291 NA19173 | [2515685 chr8 | 8 | 12276602  | 12284041  | 7440   | 14  | 1.156544  | 0.042318 | 12276206  | 12276998  | 12283622  | 1228446  |
| 292 NA19173 | [2515685 chr8 | 8 | 12314107  | 12321726  | 7620   | 22  | 0.411369  | 0.027757 | 12313944  | 12314270  | 12321548  | 1232190  |
| 293 NA19173 | [2515685 chr8 | 8 | 12504611  | 12505796  | 1186   | 4   | -0.435498 | 0.078109 | 12504598  | 12504624  | 12505774  | 1250581  |
| 294 NA19173 | [2515685 chr8 | 8 | 13644277  | 13653377  | 9101   | 8   | -0.828924 | 0.056529 | 13644028  | 13644527  | 13653026  | 1365372  |
| 295 NA19173 | [2515685 chr8 | 8 | 16245461  | 16251509  | 6049   | 6   | -0.83446  | 0.06966  | 16245129  | 16245794  | 16250812  | 1625220  |
| 296 NA19173 | [2515685 chr8 | 8 | 21951445  | 21953158  | 1714   | 2   | -0.670855 | 0.105228 | 21951089  | 21951801  | 21952730  | 2195358  |
| 297 NA19173 | [2515685 chr8 | 8 | 25028407  | 25046917  | 18511  | 15  | -0.887816 | 0.039885 | 25027885  | 25028930  | 25046777  | 2504705  |
| 298 NA19173 | [2515685 chr8 | 8 | 39351178  | 39506673  | 155496 | 162 | 0.714723  | 0.012769 | 39350826  | 39351530  | 39505284  | 3950806  |
| 299 NA19173 | [2515685 chr8 | 8 | 40301688  | 40309070  | 7383   | 7   | -0.619526 | 0.057934 | 40301316  | 40302061  | 40308873  | 4030926  |
| 300 NA19173 | [2515685 chr8 | 8 | 54001807  | 54002677  | 871    | 2   | -0.917061 | 0.129081 | 54001673  | 54001942  | 54002470  | 5400288  |
| 301 NA19173 | [2515685 chr8 | 8 | 58126924  | 58132152  | 5229   | 6   | -0.613988 | 0.065786 | 58126633  | 58127215  | 58131959  | 5813234  |
| 302 NA19173 | [2515685 chr8 | 8 | 58278355  | 58289214  | 10860  | 9   | 0.734725  | 0.044084 | 58277116  | 58279595  | 58288084  | 5829034  |

|             |                |    |           |           |        |      |           |          |           |           |           |          |
|-------------|----------------|----|-----------|-----------|--------|------|-----------|----------|-----------|-----------|-----------|----------|
| 303 NA19173 | [2515685 chr8  | 8  | 63378168  | 63387857  | 9690   | 14   | -1.743185 | 0.061435 | 63377712  | 63378624  | 63387483  | 6338823; |
| 304 NA19173 | [2515685 chr8  | 8  | 85423649  | 85431920  | 8272   | 7    | 0.877338  | 0.061208 | 85423043  | 85424256  | 85431347  | 8543249; |
| 305 NA19173 | [2515685 chr8  | 8  | 90399082  | 90406731  | 7650   | 8    | -0.741749 | 0.057682 | 90398809  | 90399355  | 90406183  | 9040728; |
| 306 NA19173 | [2515685 chr8  | 8  | 119394941 | 119403766 | 8826   | 2    | 0.598411  | 0.106042 | 119393405 | 119396477 | 119401012 | 11941024 |
| 307 NA19173 | [2515685 chr9  | 9  | 39813768  | 39815652  | 1885   | 3    | -0.541217 | 0.082355 | 39813502  | 39814035  | 39814733  | 3981657; |
| 308 NA19173 | [2515685 chr9  | 9  | 39819027  | 39822887  | 3861   | 8    | 0.256762  | 0.050308 | 39818862  | 39819192  | 39822472  | 3982330; |
| 309 NA19173 | [2515685 chr9  | 9  | 40259304  | 40273449  | 14146  | 29   | -0.347491 | 0.028583 | 40259139  | 40259470  | 40271087  | 4027696  |
| 310 NA19173 | [2515685 chr9  | 9  | 41649237  | 41651122  | 1886   | 3    | -0.541217 | 0.082355 | 41648318  | 41650157  | 41650855  | 4165138; |
| 311 NA19173 | [2515685 chr9  | 9  | 42075878  | 42078332  | 2455   | 4    | 0.513142  | 0.06492  | 42075634  | 42076122  | 42078087  | 4207857; |
| 312 NA19173 | [2515685 chr9  | 9  | 42754727  | 42756705  | 1979   | 3    | -0.728914 | 0.075146 | 42754385  | 42755070  | 42755767  | 4275764  |
| 313 NA19173 | [2515685 chr9  | 9  | 42875403  | 42877381  | 1979   | 3    | -0.728938 | 0.075147 | 42875061  | 42875746  | 42876443  | 4287832; |
| 314 NA19173 | [2515685 chr9  | 9  | 43065211  | 43066832  | 1622   | 2    | -0.862777 | 0.109864 | 43064261  | 43066162  | 43066646  | 4306701; |
| 315 NA19173 | [2515685 chr9  | 9  | 43182772  | 43185831  | 3060   | 2    | -0.810142 | 0.119778 | 43179223  | 43185134  | 43185191  | 4318647; |
| 316 NA19173 | [2515685 chr9  | 9  | 44319140  | 44340447  | 21308  | 24   | 0.273234  | 0.029997 | 44318931  | 44319349  | 44340170  | 4434072  |
| 317 NA19173 | [2515685 chr9  | 9  | 45441271  | 45493025  | 51755  | 24   | 0.271328  | 0.030225 | 45440324  | 45442218  | 45490663  | 4549826; |
| 318 NA19173 | [2515685 chr9  | 9  | 66629882  | 66688458  | 58577  | 89   | 0.255683  | 0.015445 | 66629409  | 66630356  | 66688100  | 6668881; |
| 319 NA19173 | [2515685 chr9  | 9  | 66730440  | 66740268  | 9829   | 18   | 0.304094  | 0.034482 | 66730246  | 66730634  | 66739997  | 6674053; |
| 320 NA19173 | [2515685 chr9  | 9  | 81440180  | 81441959  | 1780   | 3    | -0.453581 | 0.079739 | 81439860  | 81440500  | 81441764  | 8144215  |
| 321 NA19173 | [2515685 chr9  | 9  | 104440993 | 104449234 | 8242   | 11   | -0.552754 | 0.045755 | 104440221 | 104441766 | 104448865 | 10444960 |
| 322 NA19173 | [2515685 chr9  | 9  | 112902065 | 112932269 | 30205  | 42   | 0.404244  | 0.019646 | 112901557 | 112902574 | 112931621 | 11293291 |
| 323 NA19173 | [2515685 chr9  | 9  | 116602370 | 116616453 | 14084  | 13   | 0.44642   | 0.040762 | 116601789 | 116602952 | 116615745 | 11661716 |
| 324 NA19173 | [2515685 chr9  | 9  | 133645098 | 133650663 | 5566   | 3    | 0.514433  | 0.087654 | 133637352 | 133647460 | 133649928 | 13365139 |
| 325 NA19173 | [2515685 chr9  | 9  | 138397327 | 138399638 | 2312   | 12   | -0.344823 | 0.044558 | 138397201 | 138397454 | 138399572 | 13839970 |
| 326 NA19173 | [2515685 chr10 | 10 | 170571    | 172369    | 1799   | 2    | 0.714863  | 0.104643 | 170341    | 170801    | 171237    | 173501   |
| 327 NA19173 | [2515685 chr10 | 10 | 4427504   | 4431473   | 3970   | 4    | -0.686945 | 0.076752 | 4427110   | 4427898   | 4430742   | 443220   |
| 328 NA19173 | [2515685 chr10 | 10 | 6693908   | 6703893   | 9986   | 8    | 0.731649  | 0.058317 | 6692231   | 6695585   | 6703779   | 6704008  |
| 329 NA19173 | [2515685 chr10 | 10 | 19788068  | 19790461  | 2394   | 3    | -0.407215 | 0.076189 | 19787726  | 19788411  | 19789952  | 1979097; |
| 330 NA19173 | [2515685 chr10 | 10 | 19850003  | 19851799  | 1797   | 2    | -0.550557 | 0.109633 | 19849781  | 19850225  | 19850931  | 1985266  |
| 331 NA19173 | [2515685 chr10 | 10 | 42564252  | 42565662  | 1411   | 4    | -0.698468 | 0.075086 | 42563949  | 42564556  | 42565423  | 4256590  |
| 332 NA19173 | [2515685 chr10 | 10 | 46102946  | 46132961  | 30016  | 45   | -0.296187 | 0.019579 | 46102736  | 46103157  | 46132792  | 4613313  |
| 333 NA19173 | [2515685 chr10 | 10 | 46167732  | 46171356  | 3625   | 14   | -0.355051 | 0.035967 | 46167382  | 46168082  | 46171200  | 4617151; |
| 334 NA19173 | [2515685 chr10 | 10 | 46197322  | 46221325  | 24004  | 62   | -0.313212 | 0.003634 | 46197082  | 46197562  | 46221069  | 4622158  |
| 335 NA19173 | [2515685 chr10 | 10 | 46228317  | 47176381  | 948065 | 1354 | -0.313212 | 0.003634 | 46228145  | 46228490  | 47175283  | 4717747; |
| 336 NA19173 | [2515685 chr10 | 10 | 47219897  | 47220637  | 741    | 5    | -0.648005 | 0.070018 | 47219892  | 47219903  | 47220533  | 4722074  |
| 337 NA19173 | [2515685 chr10 | 10 | 47228616  | 47231502  | 2887   | 10   | -0.425114 | 0.041318 | 47228514  | 47228719  | 47231201  | 4723180; |
| 338 NA19173 | [2515685 chr10 | 10 | 47723237  | 47760244  | 37008  | 115  | -0.290414 | 0.009005 | 47575187  | 47725982  | 47760072  | 4776041; |
| 339 NA19173 | [2515685 chr10 | 10 | 47767237  | 47806251  | 39015  | 110  | -0.290414 | 0.009005 | 47766982  | 47767493  | 47806074  | 4780642; |
| 340 NA19173 | [2515685 chr10 | 10 | 47877984  | 47878897  | 914    | 4    | -0.576236 | 0.076404 | 47877760  | 47878209  | 47878725  | 4787907; |
| 341 NA19173 | [2515685 chr10 | 10 | 47886941  | 47889830  | 2890   | 11   | -0.446416 | 0.039086 | 47886839  | 47887044  | 47889529  | 4789013  |
| 342 NA19173 | [2515685 chr10 | 10 | 48587057  | 48610432  | 23376  | 59   | -0.315495 | 0.017603 | 48586817  | 48587297  | 48610057  | 4861080; |
| 343 NA19173 | [2515685 chr10 | 10 | 48638301  | 48715124  | 76824  | 129  | -0.358854 | 0.011218 | 48638050  | 48638553  | 48714752  | 4871549; |
| 344 NA19173 | [2515685 chr10 | 10 | 56117212  | 56139275  | 22064  | 20   | -0.918961 | 0.035469 | 56115764  | 56118661  | 56138931  | 5613961; |
| 345 NA19173 | [2515685 chr10 | 10 | 81577238  | 81578463  | 1226   | 2    | -0.701992 | 0.102375 | 81577066  | 81577411  | 81578028  | 8157889; |
| 346 NA19173 | [2515685 chr10 | 10 | 88867016  | 88935117  | 68102  | 71   | -0.382166 | 0.016535 | 88866816  | 88867217  | 88934324  | 8893591; |
| 347 NA19173 | [2515685 chr10 | 10 | 122760140 | 122770695 | 10556  | 6    | -2.736293 | 0.100543 | 122759805 | 122760476 | 122770229 | 12277116 |
| 348 NA19173 | [2515685 chr10 | 10 | 122775548 | 122777315 | 1768   | 2    | -2.333107 | 0.170486 | 122774901 | 122776196 | 122776760 | 12277787 |
| 349 NA19173 | [2515685 chr10 | 10 | 124331349 | 124348266 | 16918  | 16   | 0.642217  | 0.036375 | 124330248 | 124332451 | 124348238 | 12434829 |
| 350 NA19173 | [2515685 chr10 | 10 | 134168766 | 134170259 | 1494   | 17   | -0.411149 | 0.03745  | 134168524 | 134169008 | 134170097 | 13417042 |
| 351 NA19173 | [2515685 chr10 | 10 | 134924388 | 134926337 | 1950   | 17   | -0.654898 | 0.040386 | 134924070 | 134924706 | 134926184 | 13492649 |
| 352 NA19173 | [2515685 chr10 | 10 | 135332315 | 135357092 | 24778  | 20   | -0.256592 | 0.032353 | 135331393 | 135333238 | 135356057 | 13535812 |
| 353 NA19173 | [2515685 chr11 | 11 | 2840307   | 2842410   | 2104   | 3    | 0.691943  | 0.090419 | 2839959   | 2840656   | 2841856   | 284296;  |
| 354 NA19173 | [2515685 chr11 | 11 | 2999679   | 3174862   | 175184 | 3    | -0.398519 | 0.075128 | 2949255   | 3002762   | 3173264   | 317646;  |
| 355 NA19173 | [2515685 chr11 | 11 | 3628748   | 3632795   | 4048   | 6    | -2.88059  | 0.087165 | 3625722   | 3631775   | 3632594   | 363299;  |
| 356 NA19173 | [2515685 chr11 | 11 | 4924831   | 4933540   | 8710   | 9    | 0.5254    | 0.046803 | 4924403   | 4925260   | 4933251   | 493383;  |
| 357 NA19173 | [2515685 chr11 | 11 | 5717038   | 5722028   | 4991   | 3    | 2.781015  | 0.131205 | 5716660   | 5717416   | 5718945   | 572548;  |

|             |                |    |           |           |        |     |           |          |           |           |           |           |
|-------------|----------------|----|-----------|-----------|--------|-----|-----------|----------|-----------|-----------|-----------|-----------|
| 358 NA19173 | [2515685 chr11 | 11 | 5741269   | 5765993   | 24725  | 33  | 2.173033  | 0.038345 | 5741059   | 5741480   | 5765632   | 5766354   |
| 359 NA19173 | [2515685 chr11 | 11 | 5830457   | 5843035   | 12579  | 12  | -0.668658 | 0.046717 | 5828206   | 5832709   | 5839952   | 5849172   |
| 360 NA19173 | [2515685 chr11 | 11 | 11831868  | 11833089  | 1222   | 2   | 0.942223  | 0.103359 | 11831412  | 11832324  | 11832853  | 11833321  |
| 361 NA19173 | [2515685 chr11 | 11 | 18906905  | 18923022  | 16118  | 29  | 0.419896  | 0.027399 | 18906533  | 18907278  | 18919939  | 18928457  |
| 362 NA19173 | [2515685 chr11 | 11 | 21803767  | 21805833  | 2067   | 3   | -0.746998 | 0.080801 | 21803616  | 21803918  | 21805682  | 21805981  |
| 363 NA19173 | [2515685 chr11 | 11 | 25723253  | 25727363  | 4111   | 2   | 0.62214   | 0.116418 | 25722991  | 25723516  | 25725177  | 25729541  |
| 364 NA19173 | [2515685 chr11 | 11 | 48284073  | 48285508  | 1436   | 4   | 0.686398  | 0.074712 | 48283862  | 48284285  | 48285336  | 48285681  |
| 365 NA19173 | [2515685 chr11 | 11 | 48997072  | 49001951  | 4880   | 10  | 0.444557  | 0.046312 | 48996760  | 48997384  | 49001459  | 49002444  |
| 366 NA19173 | [2515685 chr11 | 11 | 49667589  | 49715831  | 48243  | 34  | 0.491466  | 0.024873 | 49666851  | 49668327  | 49712748  | 49721981  |
| 367 NA19173 | [2515685 chr11 | 11 | 50048965  | 50051982  | 3018   | 7   | -0.265609 | 0.051404 | 50048783  | 50049148  | 50051464  | 50052500  |
| 368 NA19173 | [2515685 chr11 | 11 | 56381856  | 56383662  | 1807   | 2   | 0.490113  | 0.097218 | 56381278  | 56382434  | 56382844  | 56384448  |
| 369 NA19173 | [2515685 chr11 | 11 | 88266938  | 88302601  | 35664  | 38  | 0.305364  | 0.023872 | 88266424  | 88267453  | 88301440  | 88303761  |
| 370 NA19173 | [2515685 chr11 | 11 | 89184898  | 89188706  | 3809   | 4   | 0.776335  | 0.079513 | 89184243  | 89185554  | 89188235  | 89189177  |
| 371 NA19173 | [2515685 chr11 | 11 | 104447230 | 104478125 | 30896  | 28  | 0.434491  | 0.027087 | 104446960 | 104447500 | 104477533 | 104478711 |
| 372 NA19173 | [2515685 chr11 | 11 | 120991694 | 120994201 | 2508   | 2   | 0.598698  | 0.111132 | 120991361 | 120992028 | 120993592 | 120994811 |
| 373 NA19173 | [2515685 chr11 | 11 | 129852648 | 129853962 | 1315   | 2   | -0.547823 | 0.100349 | 129852398 | 129852898 | 129852965 | 129854961 |
| 374 NA19173 | [2515685 chr11 | 11 | 134107699 | 134112290 | 4592   | 5   | 0.775576  | 0.067094 | 134106591 | 134108808 | 134111845 | 134112731 |
| 375 NA19173 | [2515685 chr12 | 12 | 398598    | 404873    | 6276   | 14  | -0.296825 | 0.033736 | 398035    | 399161    | 401600    | 408146    |
| 376 NA19173 | [2515685 chr12 | 12 | 736840    | 744802    | 7963   | 9   | 0.789738  | 0.051306 | 736616    | 737064    | 744211    | 745394    |
| 377 NA19173 | [2515685 chr12 | 12 | 2112534   | 2127044   | 14511  | 15  | 0.624252  | 0.038754 | 2109107   | 2115961   | 2126809   | 2127279   |
| 378 NA19173 | [2515685 chr12 | 12 | 6113530   | 6117052   | 3523   | 3   | 0.495756  | 0.093716 | 6111640   | 6115421   | 6116289   | 6117816   |
| 379 NA19173 | [2515685 chr12 | 12 | 6410033   | 6454173   | 44141  | 51  | 0.511622  | 0.021482 | 6409530   | 6410536   | 6452546   | 6455807   |
| 380 NA19173 | [2515685 chr12 | 12 | 6485950   | 6494806   | 8857   | 6   | 0.658541  | 0.066234 | 6482612   | 6489289   | 6494468   | 6495144   |
| 381 NA19173 | [2515685 chr12 | 12 | 8263675   | 8269259   | 5585   | 16  | 0.466534  | 0.034199 | 8263598   | 8263752   | 8268864   | 8269654   |
| 382 NA19173 | [2515685 chr12 | 12 | 9433821   | 9439347   | 5527   | 2   | -0.841969 | 0.13322  | 9433429   | 9434213   | 9439120   | 9439574   |
| 383 NA19173 | [2515685 chr12 | 12 | 9439936   | 9445623   | 5688   | 9   | 0.532458  | 0.044534 | 9439574   | 9440298   | 9445247   | 9446000   |
| 384 NA19173 | [2515685 chr12 | 12 | 9524239   | 9526454   | 2216   | 2   | 0.758029  | 0.112543 | 9523968   | 9524510   | 9526036   | 9526872   |
| 385 NA19173 | [2515685 chr12 | 12 | 9527659   | 9624971   | 97313  | 104 | 1.007803  | 0.016599 | 9526872   | 9528447   | 9623223   | 9626720   |
| 386 NA19173 | [2515685 chr12 | 12 | 11070849  | 11142012  | 71164  | 86  | -0.485549 | 0.016597 | 11069857  | 11071841  | 11141608  | 11142417  |
| 387 NA19173 | [2515685 chr12 | 12 | 11397201  | 11439351  | 42151  | 40  | -0.352094 | 0.023301 | 11396895  | 11397507  | 11439183  | 11439511  |
| 388 NA19173 | [2515685 chr12 | 12 | 22462548  | 22477653  | 15106  | 8   | 0.885948  | 0.050131 | 22461792  | 22463304  | 22474599  | 22480701  |
| 389 NA19173 | [2515685 chr12 | 12 | 27539466  | 27545857  | 6392   | 9   | -0.825775 | 0.054855 | 27539237  | 27539695  | 27545179  | 27546531  |
| 390 NA19173 | [2515685 chr12 | 12 | 31155331  | 31161854  | 6524   | 7   | 0.559387  | 0.057311 | 31155092  | 31155571  | 31161033  | 31162671  |
| 391 NA19173 | [2515685 chr12 | 12 | 31168973  | 31244780  | 75808  | 73  | 0.742464  | 0.0186   | 31168656  | 31169291  | 31244217  | 31245341  |
| 392 NA19173 | [2515685 chr12 | 12 | 33189085  | 33198675  | 9591   | 9   | -0.884692 | 0.054165 | 33185151  | 33192576  | 33198516  | 33198831  |
| 393 NA19173 | [2515685 chr12 | 12 | 33778546  | 33779214  | 669    | 2   | 0.570043  | 0.104582 | 33778232  | 33778861  | 33779086  | 33779341  |
| 394 NA19173 | [2515685 chr12 | 12 | 34142587  | 34153150  | 10564  | 18  | -0.518477 | 0.036904 | 34142134  | 34143040  | 34152928  | 34153371  |
| 395 NA19173 | [2515685 chr12 | 12 | 37153058  | 37156969  | 3912   | 7   | -0.370346 | 0.054547 | 37151411  | 37154706  | 37156872  | 37157061  |
| 396 NA19173 | [2515685 chr12 | 12 | 59039529  | 59044445  | 4917   | 6   | -0.844737 | 0.066116 | 59039220  | 59039839  | 59044045  | 59044841  |
| 397 NA19173 | [2515685 chr12 | 12 | 61862035  | 61865860  | 3826   | 4   | -0.396063 | 0.076802 | 61861674  | 61862396  | 61865543  | 61866171  |
| 398 NA19173 | [2515685 chr12 | 12 | 69156921  | 69167887  | 10967  | 11  | 0.668709  | 0.048289 | 69138649  | 69160412  | 69164396  | 69215017  |
| 399 NA19173 | [2515685 chr12 | 12 | 78656134  | 78664516  | 8383   | 8   | -0.423886 | 0.053534 | 78654687  | 78657582  | 78664296  | 78664731  |
| 400 NA19173 | [2515685 chr12 | 12 | 87325682  | 87347005  | 21324  | 5   | -0.390949 | 0.070048 | 87258378  | 87329173  | 87346311  | 87347701  |
| 401 NA19173 | [2515685 chr12 | 12 | 128583498 | 128587180 | 3683   | 3   | -0.774364 | 0.091493 | 128583022 | 128583974 | 128585687 | 12858867  |
| 402 NA19173 | [2515685 chr12 | 12 | 128864324 | 128869047 | 4724   | 14  | -0.359854 | 0.032218 | 128863938 | 128864711 | 128867605 | 12887048  |
| 403 NA19173 | [2515685 chr12 | 12 | 129395501 | 129397120 | 1620   | 13  | -0.2745   | 0.039989 | 129395008 | 129395994 | 129397068 | 129397171 |
| 404 NA19173 | [2515685 chr12 | 12 | 131046250 | 131046750 | 501    | 2   | 0.665147  | 0.126398 | 131046129 | 131046371 | 131046551 | 13104694  |
| 405 NA19173 | [2515685 chr13 | 13 | 25947233  | 25950398  | 3166   | 3   | 2.728415  | 0.131493 | 25946194  | 25948272  | 25949415  | 2595138   |
| 406 NA19173 | [2515685 chr13 | 13 | 31430484  | 31437209  | 6726   | 7   | -0.745483 | 0.058953 | 31430130  | 31430838  | 31436488  | 31437937  |
| 407 NA19173 | [2515685 chr13 | 13 | 33036334  | 33042392  | 6059   | 6   | 0.863798  | 0.069574 | 33034735  | 33037934  | 33041860  | 33042921  |
| 408 NA19173 | [2515685 chr13 | 13 | 69633905  | 69673289  | 39385  | 42  | 0.803518  | 0.023779 | 69633412  | 69634399  | 69672985  | 69673591  |
| 409 NA19173 | [2515685 chr13 | 13 | 110502383 | 110503129 | 747    | 3   | 0.53715   | 0.10361  | 110502225 | 110502541 | 110502890 | 11050336  |
| 410 NA19173 | [2515685 chr13 | 13 | 113079647 | 113086819 | 7173   | 3   | 0.682351  | 0.087577 | 113078890 | 113080404 | 113082138 | 11309434  |
| 411 NA19173 | [2515685 chr14 | 14 | 18439491  | 18816175  | 376685 | 602 | -0.378506 | 0.003789 | 18437497  | 18441485  | 18441307  | 18818041  |
| 412 NA19173 | [2515685 chr14 | 14 | 18899439  | 19265232  | 365794 | 644 | -0.378506 | 0.003789 | 18897773  | 18901105  | 19261661  | 19268801  |



|             |                |    |           |           |        |     |           |          |           |           |           |          |
|-------------|----------------|----|-----------|-----------|--------|-----|-----------|----------|-----------|-----------|-----------|----------|
| 413 NA19173 | [2515685 chr14 | 14 | 19269403  | 19494842  | 225440 | 211 | 0.304117  | 0.010311 | 19268804  | 19270002  | 19494444  | 1949524  |
| 414 NA19173 | [2515685 chr14 | 14 | 19619358  | 19625484  | 6127   | 3   | 2.889969  | 0.184817 | 19612261  | 19624114  | 19625018  | 1962595  |
| 415 NA19173 | [2515685 chr14 | 14 | 32022775  | 32026140  | 3366   | 2   | -0.734305 | 0.116506 | 32022274  | 32023276  | 32023749  | 3202853  |
| 416 NA19173 | [2515685 chr14 | 14 | 34183356  | 34192233  | 8878   | 12  | -0.576144 | 0.044028 | 34181692  | 34185020  | 34189097  | 3419537  |
| 417 NA19173 | [2515685 chr14 | 14 | 42059344  | 42062997  | 3654   | 2   | 0.626776  | 0.101098 | 42056485  | 42062203  | 42062601  | 4206339  |
| 418 NA19173 | [2515685 chr14 | 14 | 73063171  | 73122855  | 59685  | 54  | 0.648066  | 0.02067  | 73061866  | 73064476  | 73122227  | 7312348  |
| 419 NA19173 | [2515685 chr14 | 14 | 77193994  | 77196644  | 2651   | 3   | 0.54621   | 0.081857 | 77193776  | 77194213  | 77196380  | 7719690  |
| 420 NA19173 | [2515685 chr15 | 15 | 18842954  | 18850769  | 7816   | 12  | 0.343823  | 0.040464 | 18842593  | 18843315  | 18850013  | 1885152  |
| 421 NA19173 | [2515685 chr15 | 15 | 19273388  | 19279461  | 6074   | 5   | -0.340342 | 0.063664 | 19273171  | 19273606  | 19278933  | 1927999  |
| 422 NA19173 | [2515685 chr15 | 15 | 19838440  | 19845597  | 7158   | 12  | 0.416267  | 0.041315 | 19836986  | 19839894  | 19845254  | 1984594  |
| 423 NA19173 | [2515685 chr15 | 15 | 20204601  | 20206715  | 2115   | 2   | -0.567808 | 0.086047 | 20204425  | 20204778  | 20206324  | 2020710  |
| 424 NA19173 | [2515685 chr15 | 15 | 20217089  | 20218997  | 1909   | 5   | -0.490369 | 0.066559 | 20217011  | 20217167  | 20218750  | 2021924  |
| 425 NA19173 | [2515685 chr15 | 15 | 20234328  | 20251201  | 16874  | 21  | -0.346503 | 0.030545 | 20233781  | 20234875  | 20251142  | 2025126  |
| 426 NA19173 | [2515685 chr15 | 15 | 20371608  | 20383831  | 12224  | 17  | -0.312252 | 0.032505 | 20367922  | 20373912  | 20383079  | 2038458  |
| 427 NA19173 | [2515685 chr15 | 15 | 21130665  | 21149970  | 19306  | 36  | -0.254289 | 0.021842 | 21130580  | 21130750  | 21148830  | 2115111  |
| 428 NA19173 | [2515685 chr15 | 15 | 21605983  | 21614602  | 8620   | 8   | 0.791133  | 0.056618 | 21605507  | 21606459  | 21612298  | 2163669  |
| 429 NA19173 | [2515685 chr15 | 15 | 22616451  | 22635730  | 19280  | 19  | -0.865859 | 0.036759 | 22615585  | 22617318  | 22633426  | 2264272  |
| 430 NA19173 | [2515685 chr15 | 15 | 24986053  | 24992250  | 6198   | 7   | 0.853128  | 0.061326 | 24985426  | 24986680  | 24991680  | 2499282  |
| 431 NA19173 | [2515685 chr15 | 15 | 26168435  | 26174839  | 6405   | 10  | -0.310236 | 0.04233  | 26168147  | 26168723  | 26174441  | 2617523  |
| 432 NA19173 | [2515685 chr15 | 15 | 26309330  | 26331811  | 22482  | 37  | -0.287969 | 0.022942 | 26308972  | 26309689  | 26331265  | 2633235  |
| 433 NA19173 | [2515685 chr15 | 15 | 26353121  | 26354736  | 1616   | 5   | -0.480659 | 0.071658 | 26352589  | 26353653  | 26354650  | 2635482  |
| 434 NA19173 | [2515685 chr15 | 15 | 26365413  | 26367526  | 2114   | 2   | -0.567808 | 0.086047 | 26365024  | 26365802  | 26367348  | 2636770  |
| 435 NA19173 | [2515685 chr15 | 15 | 26372303  | 26373297  | 995    | 2   | -0.606345 | 0.099702 | 26372290  | 26372316  | 26372858  | 2637373  |
| 436 NA19173 | [2515685 chr15 | 15 | 26488752  | 26491417  | 2666   | 3   | -0.526992 | 0.077526 | 26488657  | 26488847  | 26491238  | 2649159  |
| 437 NA19173 | [2515685 chr15 | 15 | 26505642  | 26506636  | 995    | 2   | -0.606345 | 0.099702 | 26505204  | 26506081  | 26506623  | 2650664  |
| 438 NA19173 | [2515685 chr15 | 15 | 26511401  | 26514065  | 2665   | 3   | -0.526992 | 0.077526 | 26511223  | 26511579  | 26513970  | 2651416  |
| 439 NA19173 | [2515685 chr15 | 15 | 26524505  | 26526121  | 1617   | 5   | -0.48066  | 0.071658 | 26524419  | 26524592  | 26525589  | 2652665  |
| 440 NA19173 | [2515685 chr15 | 15 | 26542764  | 26565230  | 22467  | 32  | -0.291677 | 0.024394 | 26542214  | 26543314  | 26564872  | 2656558  |
| 441 NA19173 | [2515685 chr15 | 15 | 42905343  | 42905934  | 592    | 2   | -0.53787  | 0.095145 | 42905218  | 42905469  | 42905888  | 4290598  |
| 442 NA19173 | [2515685 chr15 | 15 | 43106834  | 43111174  | 4341   | 4   | 0.828842  | 0.070499 | 43106498  | 43107171  | 4311071   | 4311127  |
| 443 NA19173 | [2515685 chr15 | 15 | 70726122  | 70749872  | 23751  | 42  | -0.323315 | 0.021347 | 70725990  | 70726254  | 70749416  | 7075032  |
| 444 NA19173 | [2515685 chr15 | 15 | 72142068  | 72169903  | 27836  | 44  | -0.293355 | 0.020907 | 72141721  | 72142415  | 72169771  | 7217003  |
| 445 NA19173 | [2515685 chr15 | 15 | 73332627  | 73370318  | 37692  | 54  | -0.353047 | 0.018506 | 73332278  | 73332976  | 73369996  | 7337064  |
| 446 NA19173 | [2515685 chr15 | 15 | 74671388  | 74682822  | 11435  | 9   | 0.820102  | 0.052692 | 74671122  | 74671654  | 74680518  | 7468951  |
| 447 NA19173 | [2515685 chr15 | 15 | 75117585  | 75119946  | 2362   | 4   | 0.849897  | 0.077292 | 75117343  | 75117827  | 75119741  | 7512015  |
| 448 NA19173 | [2515685 chr15 | 15 | 76000584  | 76012399  | 11816  | 4   | -0.402267 | 0.067418 | 76000195  | 76000974  | 76012248  | 7601255  |
| 449 NA19173 | [2515685 chr15 | 15 | 77335932  | 77341524  | 5593   | 5   | -0.956777 | 0.066542 | 77335153  | 77336712  | 77341168  | 7734188  |
| 450 NA19173 | [2515685 chr15 | 15 | 82333041  | 82335194  | 2154   | 2   | -0.789648 | 0.102246 | 82332284  | 82333799  | 82334729  | 8233566  |
| 451 NA19173 | [2515685 chr15 | 15 | 89782475  | 89789175  | 6701   | 2   | 0.607443  | 0.104545 | 89782079  | 89782871  | 89788620  | 8978973  |
| 452 NA19173 | [2515685 chr15 | 15 | 98234084  | 98240716  | 6633   | 8   | 0.887445  | 0.057974 | 98233842  | 98234327  | 98239350  | 9824208  |
| 453 NA19173 | [2515685 chr15 | 15 | 100109640 | 100122682 | 13043  | 98  | 0.91795   | 0.013245 | 100108905 | 100110376 | 100122315 | 10012305 |
| 454 NA19173 | [2515685 chr15 | 15 | 100263646 | 100309150 | 45505  | 19  | 0.360338  | 0.031777 | 100263435 | 100263857 | 100307499 | 10031080 |
| 455 NA19173 | [2515685 chr16 | 16 | 847093    | 851321    | 4229   | 8   | -0.529542 | 0.054436 | 846662    | 847525    | 849440    | 857236   |
| 456 NA19173 | [2515685 chr16 | 16 | 5367156   | 5369567   | 2412   | 3   | -0.852735 | 0.079675 | 5366406   | 5367907   | 5369326   | 536980   |
| 457 NA19173 | [2515685 chr16 | 16 | 10107199  | 10108716  | 1518   | 2   | 0.586832  | 0.090507 | 10106939  | 10107460  | 10108461  | 1010897  |
| 458 NA19173 | [2515685 chr16 | 16 | 12617797  | 12618552  | 756    | 2   | 0.821175  | 0.11864  | 12617545  | 12618049  | 12618411  | 1261869  |
| 459 NA19173 | [2515685 chr16 | 16 | 14699048  | 14703775  | 4728   | 4   | 0.724954  | 0.060278 | 14696316  | 14700929  | 14703313  | 1470423  |
| 460 NA19173 | [2515685 chr16 | 16 | 14704542  | 14707381  | 2840   | 2   | 0.533513  | 0.085245 | 14704237  | 14704848  | 14706351  | 1470841  |
| 461 NA19173 | [2515685 chr16 | 16 | 14738166  | 14742897  | 4732   | 4   | 0.724954  | 0.060278 | 14735434  | 14740047  | 14742435  | 1474335  |
| 462 NA19173 | [2515685 chr16 | 16 | 14743664  | 14746503  | 2840   | 2   | 0.533513  | 0.085245 | 14743359  | 14743970  | 14745473  | 1474753  |
| 463 NA19173 | [2515685 chr16 | 16 | 16292673  | 16293255  | 583    | 3   | -0.555338 | 0.087569 | 16292450  | 16292896  | 16292938  | 1629357  |
| 464 NA19173 | [2515685 chr16 | 16 | 16633469  | 16640258  | 6790   | 5   | 0.798605  | 0.066144 | 16632502  | 16634437  | 16639854  | 1664066  |
| 465 NA19173 | [2515685 chr16 | 16 | 18421594  | 18422177  | 584    | 3   | -0.555341 | 0.087569 | 18421277  | 18421911  | 18421954  | 1842240  |
| 466 NA19173 | [2515685 chr16 | 16 | 18444324  | 18446725  | 2402   | 3   | 0.480981  | 0.088597 | 18443823  | 18444825  | 18446228  | 1844722  |
| 467 NA19173 | [2515685 chr16 | 16 | 21320882  | 21323686  | 2805   | 18  | 0.298111  | 0.029006 | 21320606  | 21321159  | 21323533  | 2132383  |

|             |                |    |          |          |        |     |           |          |          |          |          |          |
|-------------|----------------|----|----------|----------|--------|-----|-----------|----------|----------|----------|----------|----------|
| 468 NA19173 | [2515685 chr16 | 16 | 21480136 | 21485561 | 5426   | 5   | 0.511116  | 0.064282 | 21479907 | 21480366 | 21485115 | 21486001 |
| 469 NA19173 | [2515685 chr16 | 16 | 21753303 | 21756137 | 2835   | 20  | 0.30106   | 0.02746  | 21753014 | 21753593 | 21755984 | 21756291 |
| 470 NA19173 | [2515685 chr16 | 16 | 22555361 | 22591195 | 35835  | 28  | 0.399844  | 0.027847 | 22554963 | 22555760 | 22590697 | 22591691 |
| 471 NA19173 | [2515685 chr16 | 16 | 25659506 | 25661240 | 1735   | 3   | -0.397929 | 0.075608 | 25659221 | 25659791 | 25660758 | 25661721 |
| 472 NA19173 | [2515685 chr16 | 16 | 28123468 | 28126776 | 3309   | 3   | 0.583442  | 0.093776 | 28122562 | 28124375 | 28126232 | 28127321 |
| 473 NA19173 | [2515685 chr16 | 16 | 28324917 | 28333325 | 8409   | 7   | -0.420447 | 0.055668 | 28324665 | 28325169 | 28333269 | 28333381 |
| 474 NA19173 | [2515685 chr16 | 16 | 28617225 | 28628077 | 10853  | 11  | -0.360149 | 0.044621 | 28615757 | 28618694 | 28627777 | 28628371 |
| 475 NA19173 | [2515685 chr16 | 16 | 29300030 | 29302684 | 2655   | 15  | 0.290274  | 0.032375 | 29299742 | 29300318 | 29302391 | 29302971 |
| 476 NA19173 | [2515685 chr16 | 16 | 29402274 | 29404254 | 1981   | 14  | 0.2866    | 0.033089 | 29401985 | 29402564 | 29404073 | 29404431 |
| 477 NA19173 | [2515685 chr16 | 16 | 30141613 | 30144224 | 2612   | 20  | 0.294203  | 0.027723 | 30141325 | 30141901 | 30144043 | 30144401 |
| 478 NA19173 | [2515685 chr16 | 16 | 32159898 | 32160377 | 480    | 2   | -1.517387 | 0.103809 | 32159453 | 32160343 | 32160346 | 32160401 |
| 479 NA19173 | [2515685 chr16 | 16 | 32606692 | 32607163 | 472    | 2   | -1.51732  | 0.103806 | 32606661 | 32606724 | 32606727 | 32607591 |
| 480 NA19173 | [2515685 chr16 | 16 | 32667939 | 32668950 | 1012   | 5   | 0.427447  | 0.06067  | 32667738 | 32668141 | 32668644 | 32669251 |
| 481 NA19173 | [2515685 chr16 | 16 | 32911174 | 32913901 | 2728   | 5   | 0.366825  | 0.059314 | 32910852 | 32911497 | 32913513 | 32914281 |
| 482 NA19173 | [2515685 chr16 | 16 | 33039098 | 33040110 | 1013   | 5   | 0.427449  | 0.06067  | 33038792 | 33039405 | 33039908 | 33040311 |
| 483 NA19173 | [2515685 chr16 | 16 | 33100875 | 33101346 | 472    | 2   | -1.517386 | 0.103809 | 33100438 | 33101312 | 33101315 | 33101371 |
| 484 NA19173 | [2515685 chr16 | 16 | 33157406 | 33157879 | 474    | 2   | -1.517346 | 0.103807 | 33156967 | 33157845 | 33157848 | 33157911 |
| 485 NA19173 | [2515685 chr16 | 16 | 33570291 | 33571691 | 1401   | 2   | 0.484601  | 0.087056 | 33570154 | 33570429 | 33571368 | 33572011 |
| 486 NA19173 | [2515685 chr16 | 16 | 34321825 | 34606125 | 284301 | 321 | -0.458407 | 0.008218 | 34317185 | 34323706 | 34605058 | 34607191 |
| 487 NA19173 | [2515685 chr16 | 16 | 57204541 | 57207585 | 3045   | 3   | 3.643348  | 0.16858  | 57204170 | 57204913 | 57206938 | 57208231 |
| 488 NA19173 | [2515685 chr16 | 16 | 68702274 | 68789580 | 87307  | 121 | -0.395841 | 0.012975 | 68701593 | 68702955 | 68789287 | 68789871 |
| 489 NA19173 | [2515685 chr16 | 16 | 70647381 | 70650857 | 3477   | 5   | 0.369415  | 0.065004 | 70647106 | 70647656 | 70650462 | 70651251 |
| 490 NA19173 | [2515685 chr16 | 16 | 70653409 | 70668660 | 15252  | 7   | 1.067667  | 0.060856 | 70653186 | 70653632 | 70668127 | 70669191 |
| 491 NA19173 | [2515685 chr16 | 16 | 72920370 | 72965445 | 45076  | 42  | -0.456451 | 0.022375 | 72919818 | 72920922 | 72964811 | 72966071 |
| 492 NA19173 | [2515685 chr16 | 16 | 74033566 | 74036856 | 3291   | 5   | 0.3234    | 0.064465 | 74033190 | 74033943 | 74036662 | 74037051 |
| 493 NA19173 | [2515685 chr16 | 16 | 76930776 | 76942282 | 11507  | 9   | 0.587446  | 0.048566 | 76930290 | 76931263 | 76941602 | 76942961 |
| 494 NA19173 | [2515685 chr16 | 16 | 83994929 | 84004171 | 9243   | 81  | -1.13438  | 0.01473  | 83994558 | 83995300 | 84003767 | 84004571 |
| 495 NA19173 | [2515685 chr16 | 16 | 84562720 | 84565235 | 2516   | 11  | 0.375297  | 0.046818 | 84561685 | 84563756 | 84565142 | 84565321 |
| 496 NA19173 | [2515685 chr16 | 16 | 88658787 | 88663245 | 4459   | 4   | -0.58143  | 0.069621 | 88657900 | 88659675 | 88661364 | 88667241 |
| 497 NA19173 | [2515685 chr16 | 16 | 88710329 | 88712266 | 1938   | 10  | -0.369257 | 0.049585 | 88710203 | 88710456 | 88712200 | 88712331 |
| 498 NA19173 | [2515685 chr17 | 17 | 444482   | 446497   | 2016   | 9   | 0.27247   | 0.051555 | 444399   | 444565   | 445928   | 447066   |
| 499 NA19173 | [2515685 chr17 | 17 | 16657833 | 16665630 | 7798   | 12  | -0.474893 | 0.044224 | 16657486 | 16658180 | 16665353 | 16665901 |
| 500 NA19173 | [2515685 chr17 | 17 | 17174335 | 17176094 | 1760   | 2   | -0.898781 | 0.119034 | 17173522 | 17175148 | 17175588 | 17176601 |
| 501 NA19173 | [2515685 chr17 | 17 | 18296513 | 18327100 | 30588  | 43  | 0.433541  | 0.022113 | 18296246 | 18296781 | 18326880 | 18327321 |
| 502 NA19173 | [2515685 chr17 | 17 | 18331739 | 18332345 | 607    | 2   | -0.65527  | 0.096047 | 18331509 | 18331970 | 18331978 | 18332711 |
| 503 NA19173 | [2515685 chr17 | 17 | 18869568 | 18942703 | 73136  | 133 | 0.299511  | 0.007064 | 18869110 | 18870027 | 18942231 | 18943171 |
| 504 NA19173 | [2515685 chr17 | 17 | 18948307 | 18993014 | 44708  | 75  | 0.299511  | 0.007064 | 18948015 | 18948600 | 18992585 | 18993441 |
| 505 NA19173 | [2515685 chr17 | 17 | 18997456 | 19068740 | 71285  | 136 | 0.299511  | 0.007064 | 18996984 | 18997929 | 19068268 | 19069211 |
| 506 NA19173 | [2515685 chr17 | 17 | 20299935 | 20300531 | 597    | 2   | -0.655264 | 0.096046 | 20299568 | 20300303 | 20300311 | 20300751 |
| 507 NA19173 | [2515685 chr17 | 17 | 20304465 | 20335856 | 31392  | 43  | 0.366573  | 0.021711 | 20304107 | 20304823 | 20335559 | 20336151 |
| 508 NA19173 | [2515685 chr17 | 17 | 20542355 | 20546522 | 4168   | 7   | 0.282054  | 0.055606 | 20542273 | 20542438 | 20545554 | 20547491 |
| 509 NA19173 | [2515685 chr17 | 17 | 21310665 | 21312592 | 1928   | 4   | -0.530142 | 0.073409 | 21310379 | 21310951 | 21312062 | 21313121 |
| 510 NA19173 | [2515685 chr17 | 17 | 21415034 | 21418282 | 3249   | 2   | 0.905261  | 0.127138 | 21410935 | 21417234 | 21417641 | 21418921 |
| 511 NA19173 | [2515685 chr17 | 17 | 21423670 | 21424469 | 800    | 3   | -0.494779 | 0.094741 | 21423419 | 21423921 | 21424282 | 21424651 |
| 512 NA19173 | [2515685 chr17 | 17 | 21826349 | 21834752 | 8404   | 7   | 0.790696  | 0.047792 | 21826238 | 21826461 | 21833710 | 21835791 |
| 513 NA19173 | [2515685 chr17 | 17 | 21942186 | 21954469 | 12284  | 20  | -0.340222 | 0.031426 | 21941754 | 21942618 | 21954310 | 21954621 |
| 514 NA19173 | [2515685 chr17 | 17 | 31429456 | 31469200 | 39745  | 56  | 0.293005  | 0.005226 | 31429255 | 31429658 | 31468924 | 31469471 |
| 515 NA19173 | [2515685 chr17 | 17 | 31505929 | 31889223 | 383295 | 554 | 0.293005  | 0.005226 | 31505824 | 31506035 | 31888786 | 31889661 |
| 516 NA19173 | [2515685 chr17 | 17 | 33348941 | 33351216 | 2276   | 6   | -0.306301 | 0.050553 | 33348664 | 33349218 | 33351036 | 33351391 |
| 517 NA19173 | [2515685 chr17 | 17 | 33351492 | 33425145 | 73654  | 177 | 0.281583  | 0.006745 | 33351397 | 33351588 | 33424532 | 33425751 |
| 518 NA19173 | [2515685 chr17 | 17 | 33430791 | 33639547 | 208757 | 205 | 0.281583  | 0.006745 | 33428591 | 33529290 | 33638405 | 33640681 |
| 519 NA19173 | [2515685 chr17 | 17 | 36636559 | 36660007 | 23449  | 22  | -0.908706 | 0.033425 | 36635767 | 36637352 | 36659236 | 36660771 |
| 520 NA19173 | [2515685 chr17 | 17 | 36993884 | 36995674 | 1791   | 2   | -0.593859 | 0.099205 | 36993311 | 36994458 | 36995333 | 36996011 |
| 521 NA19173 | [2515685 chr17 | 17 | 41006614 | 41017119 | 10506  | 13  | -0.302637 | 0.040868 | 41006215 | 41007013 | 41016872 | 41017361 |
| 522 NA19173 | [2515685 chr17 | 17 | 41789182 | 41921615 | 132434 | 129 | 0.342422  | 0.011208 | 41788428 | 41789936 | 41920590 | 41922641 |

|             |                |    |          |          |        |     |           |          |          |          |          |          |
|-------------|----------------|----|----------|----------|--------|-----|-----------|----------|----------|----------|----------|----------|
| 523 NA19173 | [2515685 chr17 | 17 | 42006681 | 42109883 | 103203 | 98  | 0.345251  | 0.01289  | 42005927 | 42007435 | 42109375 | 4211039: |
| 524 NA19173 | [2515685 chr17 | 17 | 42988804 | 43026670 | 37867  | 54  | 0.651184  | 0.020506 | 42988208 | 42989400 | 43025568 | 4302777: |
| 525 NA19173 | [2515685 chr17 | 17 | 57681793 | 57708812 | 27020  | 57  | 0.289059  | 0.0182   | 57680114 | 57683473 | 57708467 | 5770915: |
| 526 NA19173 | [2515685 chr17 | 17 | 75019369 | 75020755 | 1387   | 3   | -0.452633 | 0.069603 | 75019115 | 75019623 | 75020523 | 7502098: |
| 527 NA19173 | [2515685 chr17 | 17 | 75223639 | 75225100 | 1462   | 4   | -0.45211  | 0.060277 | 75223385 | 75223893 | 75224893 | 7522530: |
| 528 NA19173 | [2515685 chr18 | 18 | 28142218 | 28143399 | 1182   | 2   | 0.655036  | 0.120537 | 28141854 | 28142583 | 28143055 | 2814374: |
| 529 NA19173 | [2515685 chr18 | 18 | 42791941 | 42815382 | 23442  | 23  | 0.261624  | 0.027666 | 42749992 | 42796523 | 42810800 | 4288915: |
| 530 NA19173 | [2515685 chr18 | 18 | 55803361 | 55819022 | 15662  | 21  | 0.50912   | 0.03233  | 55802910 | 55803812 | 55815432 | 5582261: |
| 531 NA19173 | [2515685 chr18 | 18 | 61351452 | 61358519 | 7068   | 7   | -0.686195 | 0.065321 | 61351102 | 61351802 | 61357912 | 6135912: |
| 532 NA19173 | [2515685 chr18 | 18 | 74392800 | 74397377 | 4578   | 3   | 0.863762  | 0.094242 | 74390826 | 74394774 | 74396965 | 7439779: |
| 533 NA19173 | [2515685 chr19 | 19 | 32148    | 117091   | 84944  | 79  | 0.266944  | 0.015688 | 30498    | 33798    | 116945   | 117238:  |
| 534 NA19173 | [2515685 chr19 | 19 | 310414   | 312953   | 2540   | 14  | -0.321787 | 0.035592 | 309687   | 311142   | 312913   | 312994:  |
| 535 NA19173 | [2515685 chr19 | 19 | 15638770 | 15643215 | 4446   | 6   | 0.331683  | 0.019525 | 15638296 | 15639244 | 15643617 | 1564361: |
| 536 NA19173 | [2515685 chr19 | 19 | 15648733 | 15694633 | 45901  | 41  | 0.331683  | 0.019525 | 15647390 | 15650077 | 15694434 | 1569483: |
| 537 NA19173 | [2515685 chr19 | 19 | 20388989 | 20510144 | 121156 | 67  | -0.476438 | 0.018555 | 20388802 | 20389176 | 20509558 | 2051073: |
| 538 NA19173 | [2515685 chr19 | 19 | 20593132 | 20594162 | 1031   | 2   | 2.379798  | 0.253968 | 20592989 | 20593276 | 20593683 | 2059464: |
| 539 NA19173 | [2515685 chr19 | 19 | 22931050 | 22934759 | 3710   | 3   | 0.742431  | 0.09888  | 22918199 | 22933577 | 22934546 | 2293497: |
| 540 NA19173 | [2515685 chr19 | 19 | 23007904 | 23014812 | 6909   | 7   | 0.67293   | 0.059692 | 22990964 | 23010431 | 23014157 | 2301546: |
| 541 NA19173 | [2515685 chr19 | 19 | 23108259 | 23109446 | 1188   | 2   | 0.618218  | 0.109681 | 23107903 | 23108615 | 23108879 | 2311001: |
| 542 NA19173 | [2515685 chr19 | 19 | 23616258 | 23625851 | 9594   | 6   | 0.328121  | 0.064809 | 23616105 | 23616411 | 23625660 | 2362604: |
| 543 NA19173 | [2515685 chr19 | 19 | 39832413 | 39842048 | 9636   | 4   | -0.870371 | 0.089688 | 39832159 | 39832668 | 39839521 | 3984641: |
| 544 NA19173 | [2515685 chr19 | 19 | 41450187 | 41493612 | 43426  | 28  | 0.344285  | 0.025998 | 41421528 | 41452714 | 41491085 | 4149785: |
| 545 NA19173 | [2515685 chr19 | 19 | 42450473 | 42487512 | 37040  | 33  | 0.308656  | 0.023256 | 42413600 | 42453000 | 42486487 | 4248853: |
| 546 NA19173 | [2515685 chr19 | 19 | 56827216 | 56836311 | 9096   | 7   | -0.9192   | 0.05795  | 56826331 | 56828101 | 56834905 | 5683771: |
| 547 NA19173 | [2515685 chr19 | 19 | 56838002 | 56841964 | 3963   | 8   | -0.366799 | 0.050329 | 56837718 | 56838287 | 56841608 | 5684232: |
| 548 NA19173 | [2515685 chr19 | 19 | 58210435 | 58244458 | 34024  | 26  | -0.734884 | 0.030218 | 58209863 | 58211007 | 58243893 | 5824502: |
| 549 NA19173 | [2515685 chr19 | 19 | 59415172 | 59420142 | 4971   | 8   | 0.260059  | 0.047255 | 59414575 | 59415770 | 59419795 | 5942048: |
| 550 NA19173 | [2515685 chr19 | 19 | 59420142 | 59435274 | 15133  | 18  | 0.829752  | 0.035298 | 59419795 | 59420489 | 59435027 | 5943552: |
| 551 NA19173 | [2515685 chr19 | 19 | 59435274 | 59439924 | 4651   | 8   | 0.275078  | 0.04719  | 59435027 | 59435522 | 59439547 | 5944030: |
| 552 NA19173 | [2515685 chr19 | 19 | 59967725 | 59969154 | 1430   | 2   | -0.513971 | 0.094688 | 59967375 | 59968076 | 59968563 | 5996974: |
| 553 NA19173 | [2515685 chr19 | 19 | 60958920 | 60962124 | 3205   | 3   | -0.422803 | 0.082597 | 60957933 | 60959907 | 60961727 | 6096252: |
| 554 NA19173 | [2515685 chr20 | 20 | 1511097  | 1532477  | 21381  | 26  | -1.761566 | 0.042865 | 1510534  | 1511660  | 1532182  | 153277:  |
| 555 NA19173 | [2515685 chr20 | 20 | 1533575  | 1544060  | 10486  | 15  | -0.336674 | 0.035519 | 1533384  | 1533766  | 1543588  | 154453:  |
| 556 NA19173 | [2515685 chr20 | 20 | 12617034 | 12623066 | 6033   | 3   | 0.514041  | 0.099346 | 12616451 | 12617617 | 12621070 | 1262506: |
| 557 NA19173 | [2515685 chr20 | 20 | 22273459 | 22278178 | 4720   | 6   | -0.757755 | 0.070896 | 22272471 | 22274448 | 22277490 | 2227886: |
| 558 NA19173 | [2515685 chr20 | 20 | 26136817 | 26137613 | 797    | 2   | 0.550428  | 0.109836 | 26136626 | 26137008 | 26137444 | 2613778: |
| 559 NA19173 | [2515685 chr20 | 20 | 61708834 | 61712547 | 3714   | 23  | -0.308689 | 0.03122  | 61708573 | 61709096 | 61711995 | 6171309: |
| 560 NA19173 | [2515685 chr20 | 20 | 62066380 | 62068214 | 1835   | 8   | 0.384693  | 0.048839 | 62066146 | 62066615 | 62067671 | 6206875: |
| 561 NA19173 | [2515685 chr20 | 20 | 62113559 | 62114878 | 1320   | 18  | -0.394928 | 0.037148 | 62113491 | 62113628 | 62114687 | 6211507: |
| 562 NA19173 | [2515685 chr21 | 21 | 10102072 | 10110484 | 8413   | 10  | -0.261349 | 0.04195  | 10101626 | 10102518 | 10110224 | 1011074: |
| 563 NA19173 | [2515685 chr21 | 21 | 22108709 | 22109827 | 1119   | 2   | -0.890514 | 0.098713 | 22108337 | 22109081 | 22109454 | 2211020: |
| 564 NA19173 | [2515685 chr22 | 22 | 14475216 | 14832930 | 357715 | 664 | -0.402979 | 0.005465 | 14474991 | 14475442 | 14831369 | 1483449: |
| 565 NA19173 | [2515685 chr22 | 22 | 18744519 | 18863336 | 118818 | 145 | -0.257096 | 0.012066 | 18742262 | 18746777 | 18863099 | 1886357: |
| 566 NA19173 | [2515685 chr22 | 22 | 19380073 | 19419486 | 39414  | 12  | -0.251422 | 0.04367  | 19377752 | 19382395 | 19416806 | 1944992: |
| 567 NA19173 | [2515685 chr22 | 22 | 20067790 | 20076708 | 8919   | 11  | -0.418204 | 0.043007 | 20067678 | 20067903 | 20076454 | 2007696: |
| 568 NA19173 | [2515685 chr22 | 22 | 20137248 | 20146413 | 9166   | 7   | -0.444833 | 0.05321  | 20136561 | 20137935 | 20146100 | 2014672: |
| 569 NA19173 | [2515685 chr22 | 22 | 20215842 | 20224728 | 8887   | 10  | -0.426633 | 0.04579  | 20215586 | 20216099 | 20224615 | 2022484: |
| 570 NA19173 | [2515685 chr22 | 22 | 22666331 | 22672624 | 6294   | 11  | 0.27225   | 0.043766 | 22666166 | 22666496 | 22672391 | 2267285: |
| 571 NA19173 | [2515685 chr22 | 22 | 22672624 | 22720154 | 47531  | 48  | 0.932225  | 0.025441 | 22672391 | 22672858 | 22719882 | 2272042: |
| 572 NA19173 | [2515685 chr22 | 22 | 33619409 | 33622591 | 3183   | 4   | 0.864319  | 0.075694 | 33618939 | 33619879 | 33622541 | 3362264: |
| 573 NA19173 | [2515685 chr22 | 22 | 41258976 | 41274269 | 15294  | 5   | 0.467605  | 0.063216 | 41257980 | 41259972 | 41274060 | 4127447: |
| 574 NA19173 | [2515685 chrX  | 23 | 1863641  | 1865837  | 2197   | 4   | -0.418097 | 0.077631 | 1862943  | 1864339  | 1865399  | 186627:  |
| 575 NA19173 | [2515685 chrX  | 23 | 2286200  | 2288297  | 2098   | 2   | 0.645968  | 0.096506 | 2285671  | 2286730  | 2287550  | 228904:  |
| 576 NA19173 | [2515685 chrX  | 23 | 7042698  | 7047382  | 4685   | 6   | 0.297201  | 0.058487 | 7042297  | 7043099  | 7046974  | 704779:  |
| 577 NA19173 | [2515685 chrX  | 23 | 9182407  | 9192056  | 9650   | 13  | 0.723859  | 0.041333 | 9181838  | 9182977  | 9191527  | 919258:  |

|             |               |    |           |           |        |     |           |          |           |           |            |           |
|-------------|---------------|----|-----------|-----------|--------|-----|-----------|----------|-----------|-----------|------------|-----------|
| 578 NA19173 | [2515685 chrX | 23 | 66907561  | 66913276  | 5716   | 6   | -1.421153 | 0.083014 | 66881715  | 66911529  | 66913165   | 66913387  |
| 579 NA19173 | [2515685 chrX | 23 | 70741274  | 70745998  | 4725   | 38  | 3.356515  | 0.047262 | 70739871  | 70742677  | 70744597   | 70747400  |
| 580 NA19173 | [2515685 chrX | 23 | 96817942  | 96820552  | 2611   | 2   | -0.550618 | 0.106437 | 96817712  | 96818173  | 96818698   | 96822407  |
| 581 NA19173 | [2515685 chrX | 23 | 105355082 | 105360133 | 5052   | 17  | 0.501759  | 0.063101 | 105352123 | 105358042 | 105359168  | 105361097 |
| 582 NA19173 | [2515685 chrX | 23 | 114782515 | 114821024 | 38510  | 81  | -0.327498 | 0.014678 | 114781834 | 114783196 | 1147817056 | 114783607 |
| 583 NA19173 | [2515685 chrX | 23 | 119787748 | 119789970 | 2223   | 3   | 0.468574  | 0.088421 | 119787006 | 119788491 | 119789667  | 119790277 |
| 584 NA19173 | [2515685 chrX | 23 | 119791965 | 119849727 | 57763  | 79  | 0.42793   | 0.013848 | 119791661 | 119792270 | 119845759  | 11985498  |
| 585 NA19173 | [2515685 chrX | 23 | 139806116 | 139834049 | 27934  | 46  | 0.345117  | 0.018512 | 139802399 | 139809834 | 139830081  | 139842277 |
| 586 NA19173 | [2515685 chrX | 23 | 140051447 | 140066704 | 15258  | 26  | 0.325343  | 0.024992 | 140043259 | 140055415 | 140062736  | 14007331  |
| 587 NA19173 | [2515685 chrX | 23 | 140386674 | 140413881 | 27208  | 48  | 0.340116  | 0.018344 | 140378397 | 140390642 | 140411067  | 14041669  |
| 588 NA19173 | [2515685 chrX | 23 | 140500460 | 140513745 | 13286  | 26  | 0.368394  | 0.025718 | 140492162 | 140504428 | 140512707  | 14051478  |
| 589 NA19173 | [2515685 chrX | 23 | 148352436 | 148355137 | 2702   | 4   | -2.196288 | 0.128794 | 148350921 | 148353952 | 148354969  | 14835530  |
| 590 NA19173 | [2515685 chrX | 23 | 148355625 | 148356839 | 1215   | 4   | -0.455741 | 0.075275 | 148355305 | 148355945 | 148356689  | 14835698  |
| 591 NA19173 | [2515685 chrX | 23 | 148356839 | 148358434 | 1596   | 2   | -4.070409 | 0.251502 | 148356689 | 148356989 | 148357426  | 14835944  |
| 592 NA19173 | [2515685 chrX | 23 | 148588219 | 148691790 | 103572 | 77  | 0.559408  | 0.017949 | 148581850 | 148592187 | 148687822  | 14875988  |
| 593 NA19173 | [2515685 chrX | 23 | 154653800 | 154656039 | 2240   | 2   | -0.982569 | 0.110044 | 154652741 | 154654860 | 154655183  | 15465689  |
| 594 NA19173 | [2515685 chrX | 23 | 154721706 | 154722677 | 972    | 2   | 0.661684  | 0.116044 | 154721235 | 154722178 | 154722342  | 15472301  |
| 595 NA19173 | [2515685 chrY | 24 | 1863641   | 1865837   | 2197   | 4   | -0.418097 | 0.077631 | 1862943   | 1864339   | 1865399    | 1866274   |
| 596 NA19173 | [2515685 chrY | 24 | 2286200   | 2288297   | 2098   | 2   | 0.645968  | 0.096506 | 2285671   | 2286730   | 2287550    | 2289045   |
| 597 NA19173 | [2515685 chrY | 24 | 10329938  | 10340296  | 10359  | 5   | 0.353426  | 0.061153 | 10329502  | 10330375  | 10339804   | 10340785  |
| 598 NA19173 | [2515685 chrY | 24 | 23624926  | 23649003  | 24078  | 50  | -0.557239 | 0.019149 | 23624485  | 23625368  | 23648757   | 23649245  |
| 599 NA19173 | [2515685 chrY | 24 | 23716390  | 23764324  | 47935  | 115 | -0.502864 | 0.012583 | 23716144  | 23716636  | 23763883   | 23764761  |
| 600 NA19173 | [2515685 chrY | 24 | 25258650  | 25285076  | 26427  | 53  | -0.367642 | 0.009376 | 25258209  | 25259092  | 25284830   | 25285327  |
| 601 NA19173 | [2515685 chrY | 24 | 25341625  | 25379999  | 38375  | 84  | -0.367642 | 0.009376 | 25341379  | 25341871  | 25379558   | 25380447  |
| 602 NA19173 | [2515685 chrY | 24 | 57531227  | 57533466  | 2240   | 2   | -0.982569 | 0.110044 | 57530168  | 57532287  | 57532610   | 57534327  |
| 603 NA19173 | [2515685 chrY | 24 | 57599133  | 57600104  | 972    | 2   | 0.661684  | 0.116044 | 57598662  | 57599605  | 57599769   | 57600444  |
| 1 NA18563   | [2515685 chr1 | 1  | 76985     | 84684     | 7700   | 8   | 0.472457  | 0.051786 | 76641     | 77329     | 81416      | 90508     |
| 2 NA18563   | [2515685 chr1 | 1  | 601047    | 612159    | 11113  | 7   | -0.946754 | 0.056603 | 587801    | 604315    | 610122     | 614196    |
| 3 NA18563   | [2515685 chr1 | 1  | 1853012   | 1854645   | 1634   | 2   | 0.633991  | 0.093457 | 1852616   | 1853409   | 1853816    | 1855474   |
| 4 NA18563   | [2515685 chr1 | 1  | 10416438  | 10418311  | 1874   | 2   | -0.77842  | 0.102362 | 10415863  | 10417014  | 10417712   | 10418917  |
| 5 NA18563   | [2515685 chr1 | 1  | 12829124  | 12869451  | 40328  | 50  | 0.379353  | 0.020033 | 12828579  | 12829669  | 12868612   | 12870297  |
| 6 NA18563   | [2515685 chr1 | 1  | 12884329  | 12886858  | 2530   | 4   | 0.604613  | 0.061221 | 12884224  | 12884434  | 12886536   | 12887181  |
| 7 NA18563   | [2515685 chr1 | 1  | 12895494  | 12898767  | 3274   | 4   | 0.419972  | 0.061207 | 12895448  | 12895540  | 12898380   | 12899151  |
| 8 NA18563   | [2515685 chr1 | 1  | 12999541  | 13003194  | 3654   | 3   | 0.571719  | 0.088898 | 12998660  | 13000422  | 13002480   | 13003901  |
| 9 NA18563   | [2515685 chr1 | 1  | 13014231  | 13096219  | 81989  | 37  | -0.339794 | 0.022831 | 13013335  | 13015127  | 13095739   | 13096701  |
| 10 NA18563  | [2515685 chr1 | 1  | 13148033  | 13151126  | 3094   | 3   | 0.433761  | 0.07183  | 13147646  | 13148420  | 13150901   | 13151357  |
| 11 NA18563  | [2515685 chr1 | 1  | 13159940  | 13162706  | 2767   | 4   | 0.627721  | 0.057467 | 13159618  | 13160263  | 13162366   | 13163047  |
| 12 NA18563  | [2515685 chr1 | 1  | 13177342  | 13197672  | 20331  | 13  | 0.285246  | 0.032067 | 13176478  | 13178206  | 13197496   | 13197845  |
| 13 NA18563  | [2515685 chr1 | 1  | 13216105  | 13240056  | 23952  | 28  | -0.272407 | 0.022914 | 13214189  | 13218021  | 13239572   | 13240547  |
| 14 NA18563  | [2515685 chr1 | 1  | 13368830  | 13371923  | 3094   | 3   | 0.433761  | 0.07183  | 13368443  | 13369217  | 13371698   | 13372144  |
| 15 NA18563  | [2515685 chr1 | 1  | 13380737  | 13383503  | 2767   | 4   | 0.627723  | 0.057467 | 13380415  | 13381060  | 13381163   | 13383847  |
| 16 NA18563  | [2515685 chr1 | 1  | 13398137  | 13418527  | 20391  | 13  | 0.285246  | 0.032067 | 13397275  | 13399000  | 13418351   | 13418707  |
| 17 NA18563  | [2515685 chr1 | 1  | 13436941  | 13460890  | 23950  | 28  | -0.278738 | 0.022982 | 13435025  | 13438857  | 13460405   | 13461371  |
| 18 NA18563  | [2515685 chr1 | 1  | 25329658  | 25409968  | 80311  | 80  | 0.284009  | 0.015959 | 25329374  | 25329943  | 25409763   | 25410177  |
| 19 NA18563  | [2515685 chr1 | 1  | 25434181  | 25439981  | 5801   | 14  | 0.307941  | 0.038904 | 25433990  | 25434373  | 25438920   | 25441047  |
| 20 NA18563  | [2515685 chr1 | 1  | 72478372  | 72524180  | 45809  | 36  | -2.328289 | 0.041209 | 72478140  | 72478604  | 72523661   | 72524701  |
| 21 NA18563  | [2515685 chr1 | 1  | 86112825  | 86116608  | 3784   | 5   | -2.147207 | 0.103031 | 86112582  | 86113069  | 86116349   | 86116867  |
| 22 NA18563  | [2515685 chr1 | 1  | 89188689  | 89189555  | 867    | 2   | 3.163387  | 0.220078 | 89188470  | 89188908  | 89189310   | 89189807  |
| 23 NA18563  | [2515685 chr1 | 1  | 94869509  | 94870854  | 1346   | 3   | 0.561676  | 0.078046 | 94869219  | 94869799  | 94870647   | 94871106  |
| 24 NA18563  | [2515685 chr1 | 1  | 103827497 | 103834166 | 6670   | 16  | 0.400889  | 0.034899 | 103827175 | 103827820 | 103833999  | 103834337 |
| 25 NA18563  | [2515685 chr1 | 1  | 103848297 | 103865050 | 16754  | 25  | 0.502961  | 0.008028 | 103842566 | 103851565 | 103864928  | 103865177 |
| 26 NA18563  | [2515685 chr1 | 1  | 103873304 | 104015928 | 142625 | 230 | 0.502961  | 0.008028 | 103873021 | 103873587 | 104013178  | 104018677 |
| 27 NA18563  | [2515685 chr1 | 1  | 108444641 | 108449550 | 4910   | 9   | -1.545003 | 0.067044 | 108443817 | 108445466 | 108449224  | 108449877 |
| 28 NA18563  | [2515685 chr1 | 1  | 109936541 | 109969406 | 32866  | 36  | 0.356414  | 0.024211 | 109935803 | 109937279 | 109969060  | 109969757 |
| 29 NA18563  | [2515685 chr1 | 1  | 112405902 | 112416691 | 10790  | 10  | 0.530471  | 0.049676 | 112405415 | 112406389 | 112416423  | 112416967 |

|            |               |   |           |           |        |     |           |          |           |           |           |          |
|------------|---------------|---|-----------|-----------|--------|-----|-----------|----------|-----------|-----------|-----------|----------|
| 30 NA18563 | [2515685 chr1 | 1 | 120263820 | 120340323 | 76504  | 123 | 0.270178  | 0.012771 | 120263381 | 120264260 | 120339896 | 12034075 |
| 31 NA18563 | [2515685 chr1 | 1 | 141384808 | 141390308 | 5501   | 7   | 0.338432  | 0.053814 | 120962965 | 141388076 | 141390261 | 14139035 |
| 32 NA18563 | [2515685 chr1 | 1 | 141397361 | 141397621 | 261    | 2   | 0.547716  | 0.087913 | 141397277 | 141397446 | 141397551 | 14139769 |
| 33 NA18563 | [2515685 chr1 | 1 | 141902687 | 141981849 | 79163  | 185 | 0.259069  | 0.00946  | 141902514 | 141902861 | 141978581 | 14203010 |
| 34 NA18563 | [2515685 chr1 | 1 | 142080534 | 142102147 | 21614  | 50  | 0.256497  | 0.018115 | 142080422 | 142080646 | 142099900 | 14210439 |
| 35 NA18563 | [2515685 chr1 | 1 | 142439523 | 142569435 | 129913 | 158 | 0.359852  | 0.011542 | 142439104 | 142439942 | 142568775 | 14257009 |
| 36 NA18563 | [2515685 chr1 | 1 | 145044635 | 145045386 | 752    | 2   | 0.680405  | 0.093343 | 145044092 | 145045178 | 145045179 | 14504559 |
| 37 NA18563 | [2515685 chr1 | 1 | 145095961 | 145097353 | 1393   | 4   | 0.556376  | 0.056765 | 145095646 | 145096276 | 145097116 | 14509759 |
| 38 NA18563 | [2515685 chr1 | 1 | 145100273 | 145104138 | 3866   | 10  | 0.497946  | 0.041457 | 145100193 | 145100354 | 145103923 | 14510435 |
| 39 NA18563 | [2515685 chr1 | 1 | 145397658 | 145398426 | 769    | 2   | 0.652173  | 0.080277 | 145397226 | 145398090 | 145398111 | 14539874 |
| 40 NA18563 | [2515685 chr1 | 1 | 145558689 | 145560454 | 1766   | 3   | 0.61569   | 0.071902 | 145558089 | 145559289 | 145560139 | 14556076 |
| 41 NA18563 | [2515685 chr1 | 1 | 145930102 | 145943828 | 13727  | 15  | 0.434404  | 0.037787 | 145929732 | 145930472 | 145942061 | 14594559 |
| 42 NA18563 | [2515685 chr1 | 1 | 145948782 | 145951531 | 2750   | 5   | 0.508554  | 0.066147 | 145948518 | 145949046 | 145951467 | 14595159 |
| 43 NA18563 | [2515685 chr1 | 1 | 146332893 | 146340401 | 7509   | 23  | 0.403234  | 0.026499 | 146332603 | 146333183 | 146340086 | 14634071 |
| 44 NA18563 | [2515685 chr1 | 1 | 146389389 | 146392019 | 2631   | 6   | 0.491537  | 0.055912 | 146389385 | 146389393 | 146391724 | 14639231 |
| 45 NA18563 | [2515685 chr1 | 1 | 146458878 | 146475780 | 16903  | 13  | 0.262267  | 0.035892 | 146457879 | 146459877 | 146473762 | 14647779 |
| 46 NA18563 | [2515685 chr1 | 1 | 148998878 | 149005918 | 7041   | 13  | 0.500337  | 0.035124 | 148998401 | 148999355 | 149004680 | 14900715 |
| 47 NA18563 | [2515685 chr1 | 1 | 149368571 | 149384391 | 15821  | 2   | -0.811024 | 0.101421 | 149368105 | 149369038 | 149383444 | 14938533 |
| 48 NA18563 | [2515685 chr1 | 1 | 149385742 | 149399435 | 13694  | 19  | -2.106852 | 0.053462 | 149385339 | 149386145 | 149399080 | 14939979 |
| 49 NA18563 | [2515685 chr1 | 1 | 171527310 | 171533429 | 6120   | 6   | -0.754712 | 0.064404 | 171526198 | 171528423 | 171533245 | 17153361 |
| 50 NA18563 | [2515685 chr1 | 1 | 193443495 | 193473038 | 29544  | 23  | -0.45735  | 0.03148  | 193443280 | 193443710 | 193471732 | 19347434 |
| 51 NA18563 | [2515685 chr1 | 1 | 193490080 | 193618673 | 128594 | 124 | -0.790506 | 0.014597 | 193489477 | 193490684 | 193618374 | 19361897 |
| 52 NA18563 | [2515685 chr1 | 1 | 193620474 | 193650443 | 29970  | 23  | -0.374556 | 0.030083 | 193620254 | 193620694 | 193650245 | 19365064 |
| 53 NA18563 | [2515685 chr1 | 1 | 204210291 | 204215744 | 5454   | 8   | 0.295644  | 0.05163  | 204210088 | 204210494 | 204215470 | 20421601 |
| 54 NA18563 | [2515685 chr1 | 1 | 218762650 | 218771442 | 8793   | 8   | 0.311761  | 0.052927 | 218762212 | 218763089 | 218771135 | 21877175 |
| 55 NA18563 | [2515685 chr1 | 1 | 236719047 | 236720968 | 1922   | 3   | -0.859261 | 0.087653 | 236718751 | 236719344 | 236720749 | 23672118 |
| 56 NA18563 | [2515685 chr1 | 1 | 243009520 | 243011368 | 1849   | 3   | -0.627947 | 0.084803 | 243008430 | 243010610 | 243011204 | 24301153 |
| 57 NA18563 | [2515685 chr1 | 1 | 244872415 | 244874098 | 1684   | 5   | -1.455134 | 0.084038 | 244872245 | 244872585 | 244873799 | 24487439 |
| 58 NA18563 | [2515685 chr2 | 2 | 304892    | 846710    | 541819 | 530 | 0.443325  | 0.006364 | 304425    | 305360    | 846457    | 846963   |
| 59 NA18563 | [2515685 chr2 | 2 | 34606447  | 34644762  | 38316  | 39  | 0.711363  | 0.0248   | 34601818  | 34609397  | 34641812  | 3464839  |
| 60 NA18563 | [2515685 chr2 | 2 | 36245925  | 36253906  | 7982   | 4   | -0.817513 | 0.085122 | 36243469  | 36248382  | 36250956  | 3625755  |
| 61 NA18563 | [2515685 chr2 | 2 | 37869648  | 37911473  | 41826  | 43  | 0.310848  | 0.02167  | 37869077  | 37870220  | 37911214  | 3791173  |
| 62 NA18563 | [2515685 chr2 | 2 | 52661573  | 52696869  | 35297  | 26  | -0.831821 | 0.030828 | 52661218  | 52661928  | 52696416  | 5269732  |
| 63 NA18563 | [2515685 chr2 | 2 | 56207217  | 56302026  | 94810  | 88  | 0.476045  | 0.015629 | 56193827  | 56210167  | 56300318  | 5630373  |
| 64 NA18563 | [2515685 chr2 | 2 | 56563627  | 56567381  | 3755   | 2   | 3.595655  | 0.211869 | 56556559  | 56566577  | 56567035  | 5656772  |
| 65 NA18563 | [2515685 chr2 | 2 | 58735266  | 58736833  | 1568   | 2   | -0.521205 | 0.085711 | 58734865  | 58735667  | 58736407  | 5873725  |
| 66 NA18563 | [2515685 chr2 | 2 | 61675589  | 61676777  | 1189   | 2   | 0.867306  | 0.126483 | 61675200  | 61675979  | 61676468  | 6167708  |
| 67 NA18563 | [2515685 chr2 | 2 | 66416834  | 66420210  | 3377   | 2   | -0.726437 | 0.096414 | 66416385  | 66417284  | 66419065  | 6642135  |
| 68 NA18563 | [2515685 chr2 | 2 | 73921778  | 73925487  | 3710   | 7   | 0.298547  | 0.047712 | 73921335  | 73922222  | 73925419  | 7392555  |
| 69 NA18563 | [2515685 chr2 | 2 | 73925784  | 73945080  | 19297  | 28  | 0.278762  | 0.021507 | 73925556  | 73926013  | 73945012  | 7394514  |
| 70 NA18563 | [2515685 chr2 | 2 | 73945377  | 73947364  | 1988   | 4   | 0.374719  | 0.070624 | 73945149  | 73945606  | 73947215  | 7394751  |
| 71 NA18563 | [2515685 chr2 | 2 | 75296507  | 75298934  | 2428   | 2   | 0.971509  | 0.10834  | 75296056  | 75296959  | 75298532  | 7529933  |
| 72 NA18563 | [2515685 chr2 | 2 | 94764285  | 94838621  | 74337  | 77  | 0.411736  | 0.016405 | 94762412  | 94766159  | 94838405  | 9483883  |
| 73 NA18563 | [2515685 chr2 | 2 | 95017765  | 95029198  | 11434  | 21  | 0.261512  | 0.032093 | 95017538  | 95017993  | 95028733  | 9502966  |
| 74 NA18563 | [2515685 chr2 | 2 | 97184386  | 97189732  | 5347   | 2   | -0.767752 | 0.10537  | 97182781  | 97185992  | 97186782  | 9719672  |
| 75 NA18563 | [2515685 chr2 | 2 | 107475477 | 107477568 | 2092   | 2   | -0.967898 | 0.125076 | 107474333 | 107476621 | 107477239 | 10747789 |
| 76 NA18563 | [2515685 chr2 | 2 | 108313968 | 108314875 | 908    | 2   | 0.69784   | 0.108461 | 108313664 | 108314272 | 108314680 | 10831507 |
| 77 NA18563 | [2515685 chr2 | 2 | 110045666 | 110090456 | 44791  | 52  | 0.386176  | 0.019324 | 110045166 | 110046166 | 110090289 | 11009062 |
| 78 NA18563 | [2515685 chr2 | 2 | 110342579 | 110351600 | 9022   | 4   | 0.364244  | 0.056774 | 110341047 | 110344111 | 110348650 | 11050533 |
| 79 NA18563 | [2515685 chr2 | 2 | 110590037 | 110632991 | 42955  | 39  | 0.400896  | 0.022042 | 110589893 | 110590182 | 110632491 | 11063349 |
| 80 NA18563 | [2515685 chr2 | 2 | 113888053 | 113970655 | 82603  | 124 | 0.452408  | 0.012764 | 113887658 | 113888448 | 113970622 | 11397068 |
| 81 NA18563 | [2515685 chr2 | 2 | 114005173 | 114008852 | 3680   | 5   | 0.448904  | 0.066151 | 114005050 | 114005296 | 114008740 | 11400896 |
| 82 NA18563 | [2515685 chr2 | 2 | 126159437 | 126168349 | 8913   | 3   | -2.693163 | 0.130219 | 126158494 | 126160381 | 126168048 | 12616865 |
| 83 NA18563 | [2515685 chr2 | 2 | 130449037 | 130450259 | 1223   | 2   | -0.717684 | 0.099579 | 130448725 | 130449350 | 130449916 | 13045060 |
| 84 NA18563 | [2515685 chr2 | 2 | 131952094 | 131953962 | 1869   | 3   | -0.566902 | 0.090474 | 131951874 | 131952315 | 131953571 | 13195435 |

|             |               |   |           |           |        |     |           |          |           |           |           |          |
|-------------|---------------|---|-----------|-----------|--------|-----|-----------|----------|-----------|-----------|-----------|----------|
| 85 NA18563  | [2515685 chr2 | 2 | 132789932 | 132802628 | 12697  | 16  | 0.299261  | 0.035755 | 132789529 | 132790336 | 132799678 | 13284372 |
| 86 NA18563  | [2515685 chr2 | 2 | 153495553 | 153499409 | 3857   | 2   | 0.684912  | 0.119784 | 153484545 | 153498503 | 153498846 | 15349997 |
| 87 NA18563  | [2515685 chr2 | 2 | 208176479 | 208184457 | 7979   | 7   | 0.790418  | 0.058911 | 208176093 | 208176865 | 208183930 | 20818498 |
| 88 NA18563  | [2515685 chr2 | 2 | 242664580 | 242668683 | 4104   | 10  | 1.646709  | 0.045004 | 242664284 | 242664877 | 242668532 | 24266883 |
| 89 NA18563  | [2515685 chr3 | 3 | 154057    | 155969    | 1913   | 2   | -0.761149 | 0.103611 | 153604    | 154511    | 155297    | 156642   |
| 90 NA18563  | [2515685 chr3 | 3 | 1757211   | 1765701   | 8491   | 2   | 0.768538  | 0.115592 | 1756096   | 1758327   | 1762058   | 179730   |
| 91 NA18563  | [2515685 chr3 | 3 | 42350188  | 42351248  | 1061   | 2   | 0.501046  | 0.09526  | 42349839  | 42350537  | 42351007  | 4235149  |
| 92 NA18563  | [2515685 chr3 | 3 | 50888459  | 50888513  | 55     | 2   | 0.579753  | 0.114782 | 50888445  | 50888474  | 50888495  | 5088853  |
| 93 NA18563  | [2515685 chr3 | 3 | 131270140 | 131276429 | 6290   | 3   | 0.526814  | 0.100015 | 131269235 | 131271046 | 131272786 | 13128032 |
| 94 NA18563  | [2515685 chr3 | 3 | 133191392 | 133196576 | 5185   | 5   | -0.776713 | 0.065938 | 133190820 | 133191965 | 133195824 | 13319732 |
| 95 NA18563  | [2515685 chr3 | 3 | 150445844 | 150452241 | 6398   | 7   | -0.783051 | 0.058093 | 150444780 | 150446909 | 150451900 | 15045258 |
| 96 NA18563  | [2515685 chr3 | 3 | 156042614 | 156043843 | 1230   | 2   | -0.642119 | 0.10453  | 156042074 | 156043154 | 156043483 | 15604420 |
| 97 NA18563  | [2515685 chr3 | 3 | 163695625 | 163718089 | 22465  | 23  | -0.869472 | 0.035158 | 163692969 | 163698282 | 163717674 | 16371850 |
| 98 NA18563  | [2515685 chr3 | 3 | 176561952 | 176567506 | 5555   | 5   | -0.844241 | 0.072501 | 176560250 | 176563654 | 176565991 | 17656902 |
| 99 NA18563  | [2515685 chr3 | 3 | 190846156 | 190852181 | 6026   | 4   | -1.040798 | 0.079434 | 190845504 | 190846809 | 190850598 | 19085376 |
| 100 NA18563 | [2515685 chr3 | 3 | 191219813 | 191223326 | 3514   | 4   | -1.753579 | 0.103116 | 191219291 | 191220336 | 191222918 | 19122373 |
| 101 NA18563 | [2515685 chr3 | 3 | 192529983 | 192531919 | 1937   | 2   | -0.649989 | 0.113658 | 192528925 | 192531041 | 192531576 | 19253226 |
| 102 NA18563 | [2515685 chr3 | 3 | 192547312 | 192554331 | 7020   | 10  | 0.873532  | 0.051718 | 192546950 | 192547674 | 192554127 | 19255453 |
| 103 NA18563 | [2515685 chr3 | 3 | 196679304 | 196713768 | 34465  | 36  | 0.371519  | 0.021433 | 196677636 | 196680972 | 196711768 | 19671576 |
| 104 NA18563 | [2515685 chr3 | 3 | 196944913 | 196962949 | 18037  | 14  | 0.355992  | 0.040314 | 196944128 | 196945698 | 196962408 | 19696349 |
| 105 NA18563 | [2515685 chr3 | 3 | 196994475 | 197002965 | 8491   | 10  | 0.586038  | 0.044788 | 196994054 | 196994896 | 197002044 | 19700388 |
| 106 NA18563 | [2515685 chr3 | 3 | 198421889 | 198427408 | 5520   | 3   | 0.63375   | 0.088836 | 198421397 | 198422381 | 198423959 | 19843085 |
| 107 NA18563 | [2515685 chr3 | 3 | 199313925 | 199321616 | 7692   | 16  | -0.70207  | 0.032966 | 199313515 | 199314336 | 199321283 | 19932194 |
| 108 NA18563 | [2515685 chr3 | 3 | 199383694 | 199384627 | 934    | 4   | -0.463627 | 0.081737 | 199383507 | 199383882 | 199384512 | 19938474 |
| 109 NA18563 | [2515685 chr4 | 4 | 8740317   | 8756949   | 16633  | 25  | 0.903828  | 0.024069 | 8740049   | 8756813   | 8756813   | 875708   |
| 110 NA18563 | [2515685 chr4 | 4 | 8998178   | 9046719   | 48542  | 87  | 0.705116  | 0.012643 | 8850774   | 9001243   | 9046129   | 904730   |
| 111 NA18563 | [2515685 chr4 | 4 | 9299470   | 9304702   | 5233   | 3   | -0.737297 | 0.092667 | 9295439   | 9302535   | 9304241   | 930516   |
| 112 NA18563 | [2515685 chr4 | 4 | 9812346   | 9813108   | 763    | 33  | -0.291537 | 0.019763 | 9812284   | 9812408   | 9812952   | 981326   |
| 113 NA18563 | [2515685 chr4 | 4 | 9887220   | 9911397   | 24178  | 31  | 1.791456  | 0.040238 | 9886886   | 9887555   | 9910388   | 991240   |
| 114 NA18563 | [2515685 chr4 | 4 | 34602797  | 34650994  | 48198  | 45  | 0.790571  | 0.023972 | 34601994  | 34603600  | 34649535  | 3465245  |
| 115 NA18563 | [2515685 chr4 | 4 | 70206173  | 70442319  | 236147 | 234 | 0.28529   | 0.009742 | 70205193  | 70207154  | 70442003  | 7044263  |
| 116 NA18563 | [2515685 chr4 | 4 | 115534211 | 115541546 | 7336   | 9   | 0.883165  | 0.055643 | 115530015 | 115537276 | 115539984 | 11554310 |
| 117 NA18563 | [2515685 chr4 | 4 | 115865203 | 115869480 | 4278   | 3   | -0.687383 | 0.098661 | 115864913 | 115865494 | 115866415 | 11587556 |
| 118 NA18563 | [2515685 chr4 | 4 | 124836229 | 124837199 | 971    | 2   | -0.625364 | 0.094882 | 124835991 | 124836467 | 124836924 | 12483747 |
| 119 NA18563 | [2515685 chr4 | 4 | 132947532 | 133000684 | 53153  | 46  | 0.280162  | 0.021969 | 132934869 | 132950597 | 132999479 | 13300189 |
| 120 NA18563 | [2515685 chr4 | 4 | 133043320 | 133253095 | 209776 | 242 | 0.510642  | 0.009445 | 133042031 | 133044609 | 133252862 | 13325332 |
| 121 NA18563 | [2515685 chr4 | 4 | 138537751 | 138549906 | 12156  | 14  | 0.925118  | 0.04521  | 138537443 | 138538059 | 138547414 | 13855239 |
| 122 NA18563 | [2515685 chr4 | 4 | 142588136 | 142590500 | 2365   | 4   | -0.707408 | 0.078864 | 142587774 | 142588498 | 142590303 | 14259069 |
| 123 NA18563 | [2515685 chr4 | 4 | 145238696 | 145245588 | 6893   | 5   | -0.535826 | 0.06933  | 145236919 | 145240473 | 145245192 | 14524598 |
| 124 NA18563 | [2515685 chr4 | 4 | 162217911 | 162289219 | 71309  | 70  | 0.959695  | 0.018992 | 162216641 | 162219182 | 162288939 | 16228949 |
| 125 NA18563 | [2515685 chr4 | 4 | 162312826 | 162317203 | 4378   | 3   | 0.725677  | 0.095645 | 162312706 | 162312947 | 162314138 | 16232117 |
| 126 NA18563 | [2515685 chr4 | 4 | 162807723 | 162809269 | 1547   | 2   | -3.389252 | 0.190116 | 162807204 | 162808243 | 162808734 | 16280980 |
| 127 NA18563 | [2515685 chr4 | 4 | 169184442 | 169368370 | 183929 | 162 | 0.771187  | 0.012251 | 169184090 | 169184794 | 169366713 | 16937002 |
| 128 NA18563 | [2515685 chr4 | 4 | 173799832 | 173807320 | 7489   | 6   | -2.783445 | 0.126862 | 173799464 | 173800201 | 173804255 | 17381134 |
| 129 NA18563 | [2515685 chr4 | 4 | 185533276 | 185544849 | 11574  | 12  | 0.7809    | 0.045847 | 185532696 | 185533857 | 185543276 | 18554642 |
| 130 NA18563 | [2515685 chr4 | 4 | 187728494 | 187732907 | 4414   | 15  | 2.358661  | 0.056962 | 187728193 | 187728795 | 187732541 | 18773327 |
| 131 NA18563 | [2515685 chr4 | 4 | 188255523 | 188269680 | 14158  | 235 | 0.445928  | 0.008757 | 188255215 | 188255831 | 188269403 | 18826995 |
| 132 NA18563 | [2515685 chr4 | 4 | 189123029 | 189390668 | 267640 | 3   | -0.673107 | 0.093687 | 189020755 | 189126094 | 189387603 | 18943972 |
| 133 NA18563 | [2515685 chr4 | 4 | 190528602 | 190533163 | 4562   | 21  | -2.512786 | 0.045338 | 190528058 | 190529146 | 190531664 | 19053466 |
| 134 NA18563 | [2515685 chr5 | 5 | 261631    | 263283    | 1653   | 9   | 0.330107  | 0.052779 | 261032    | 262230    | 262766    | 263801   |
| 135 NA18563 | [2515685 chr5 | 5 | 520743    | 521684    | 942    | 5   | 0.556197  | 0.074637 | 520428    | 521059    | 521427    | 521942   |
| 136 NA18563 | [2515685 chr5 | 5 | 809400    | 819444    | 10045  | 12  | 0.348854  | 0.045829 | 808803    | 809997    | 819065    | 819824   |
| 137 NA18563 | [2515685 chr5 | 5 | 1075284   | 1079920   | 4637   | 24  | 0.586163  | 0.027829 | 1074709   | 1075859   | 1079566   | 108027   |
| 138 NA18563 | [2515685 chr5 | 5 | 1122995   | 1126517   | 3523   | 38  | 0.27884   | 0.020095 | 1122772   | 1123219   | 1126389   | 112664   |
| 139 NA18563 | [2515685 chr5 | 5 | 1231558   | 1233247   | 1690   | 2   | -0.895698 | 0.101293 | 1231167   | 1231949   | 1232879   | 123361   |

|             |               |   |           |           |       |     |           |          |           |           |           |          |
|-------------|---------------|---|-----------|-----------|-------|-----|-----------|----------|-----------|-----------|-----------|----------|
| 140 NA18563 | [2515685 chr5 | 5 | 15363452  | 15364473  | 1022  | 2   | -0.483979 | 0.094823 | 15363087  | 15363818  | 15364277  | 15364665 |
| 141 NA18563 | [2515685 chr5 | 5 | 17570617  | 17643104  | 72488 | 331 | -0.332448 | 0.006819 | 17570551  | 17570684  | 17642455  | 17643755 |
| 142 NA18563 | [2515685 chr5 | 5 | 17663728  | 17667407  | 3680  | 8   | -0.272208 | 0.046555 | 17663473  | 17663984  | 17667174  | 17667664 |
| 143 NA18563 | [2515685 chr5 | 5 | 19410747  | 19412172  | 1426  | 3   | 0.775915  | 0.08565  | 19410189  | 19411305  | 19411980  | 19412361 |
| 144 NA18563 | [2515685 chr5 | 5 | 21483394  | 21488147  | 4754  | 4   | -0.734768 | 0.072458 | 21480817  | 21485972  | 21487855  | 21488435 |
| 145 NA18563 | [2515685 chr5 | 5 | 26829433  | 26837938  | 8506  | 7   | 0.68734   | 0.064374 | 26829009  | 26829858  | 26837469  | 26838401 |
| 146 NA18563 | [2515685 chr5 | 5 | 68865200  | 68886836  | 21637 | 45  | 0.402722  | 0.022624 | 68864770  | 68865630  | 68886492  | 68887181 |
| 147 NA18563 | [2515685 chr5 | 5 | 69358940  | 69373776  | 14837 | 18  | 0.43036   | 0.01715  | 69358540  | 69359340  | 69372957  | 69374591 |
| 148 NA18563 | [2515685 chr5 | 5 | 69383899  | 69411352  | 27454 | 28  | 0.43036   | 0.01715  | 69381359  | 69386439  | 69410702  | 69412001 |
| 149 NA18563 | [2515685 chr5 | 5 | 69461984  | 69514569  | 52586 | 114 | 0.269396  | 0.011748 | 69461714  | 69462255  | 69513457  | 6951568  |
| 150 NA18563 | [2515685 chr5 | 5 | 70234358  | 70286789  | 52432 | 51  | 0.43136   | 0.017158 | 70233958  | 70234758  | 70286122  | 70287451 |
| 151 NA18563 | [2515685 chr5 | 5 | 70403953  | 70426554  | 22602 | 43  | 0.430883  | 0.02305  | 70403337  | 70404569  | 70425419  | 70427681 |
| 152 NA18563 | [2515685 chr5 | 5 | 70459489  | 70514955  | 55467 | 111 | 0.259557  | 0.011832 | 70459389  | 70459590  | 70513837  | 7051607  |
| 153 NA18563 | [2515685 chr5 | 5 | 79982063  | 79984314  | 2252  | 2   | -0.483041 | 0.094974 | 79981555  | 79982572  | 79983998  | 7998463  |
| 154 NA18563 | [2515685 chr5 | 5 | 79992681  | 79999566  | 6886  | 7   | 0.309479  | 0.060651 | 79992202  | 79993161  | 79998428  | 80000701 |
| 155 NA18563 | [2515685 chr5 | 5 | 81459214  | 81466054  | 6841  | 2   | -1.278886 | 0.119616 | 81455614  | 81462405  | 81462863  | 81470281 |
| 156 NA18563 | [2515685 chr5 | 5 | 93928460  | 93933101  | 4642  | 4   | -0.483507 | 0.080262 | 93927706  | 93929215  | 93931984  | 93934211 |
| 157 NA18563 | [2515685 chr5 | 5 | 97427204  | 97428353  | 1150  | 2   | 0.878874  | 0.115714 | 97426913  | 97427496  | 97428177  | 97428521 |
| 158 NA18563 | [2515685 chr5 | 5 | 99408801  | 99419037  | 10237 | 14  | -0.585188 | 0.04042  | 99408605  | 99408997  | 99418328  | 99419741 |
| 159 NA18563 | [2515685 chr5 | 5 | 137835178 | 137844134 | 8957  | 8   | 0.521195  | 0.05625  | 137834745 | 137835611 | 137843310 | 13784495 |
| 160 NA18563 | [2515685 chr5 | 5 | 140203081 | 140217091 | 14011 | 18  | 1.752548  | 0.053471 | 140202344 | 140203819 | 140216552 | 14021763 |
| 161 NA18563 | [2515685 chr5 | 5 | 140217091 | 140218928 | 1838  | 2   | 0.594418  | 0.108246 | 140216552 | 140217631 | 140218508 | 14021934 |
| 162 NA18563 | [2515685 chr5 | 5 | 140534849 | 140540106 | 5258  | 5   | 0.507787  | 0.065997 | 140534700 | 140534999 | 140539007 | 14054120 |
| 163 NA18563 | [2515685 chr5 | 5 | 150183322 | 150204419 | 21098 | 12  | -0.615204 | 0.045244 | 150181427 | 150185218 | 150204151 | 15020468 |
| 164 NA18563 | [2515685 chr5 | 5 | 178994494 | 178994971 | 478   | 2   | -0.48713  | 0.091859 | 178994223 | 178994766 | 178994768 | 17899517 |
| 165 NA18563 | [2515685 chr5 | 5 | 179016786 | 179017263 | 478   | 2   | -0.48713  | 0.091859 | 179016582 | 179016990 | 179016992 | 17901753 |
| 166 NA18563 | [2515685 chr5 | 5 | 180272463 | 180280226 | 7764  | 6   | -0.337613 | 0.065885 | 180271275 | 180273651 | 180277035 | 18028376 |
| 167 NA18563 | [2515685 chr5 | 5 | 180308895 | 180363417 | 54523 | 54  | 0.506753  | 0.020609 | 180308688 | 180309103 | 180363120 | 18036371 |
| 168 NA18563 | [2515685 chr6 | 6 | 26847749  | 26869540  | 21792 | 39  | 0.293891  | 0.023859 | 26846249  | 26849250  | 26868432  | 26870641 |
| 169 NA18563 | [2515685 chr6 | 6 | 29804642  | 29890331  | 85690 | 4   | 0.355707  | 0.068151 | 29800552  | 29808139  | 29889999  | 29890666 |
| 170 NA18563 | [2515685 chr6 | 6 | 29954251  | 30002365  | 48115 | 41  | 0.466561  | 0.020399 | 29950833  | 29957670  | 30002108  | 30002621 |
| 171 NA18563 | [2515685 chr6 | 6 | 30006099  | 30017868  | 11770 | 9   | 0.466561  | 0.020399 | 30005363  | 30006836  | 30017587  | 30018141 |
| 172 NA18563 | [2515685 chr6 | 6 | 30051460  | 30052527  | 1068  | 3   | 0.526568  | 0.081941 | 30051232  | 30051688  | 30052363  | 30052691 |
| 173 NA18563 | [2515685 chr6 | 6 | 31346265  | 31354596  | 8332  | 9   | 0.417621  | 0.01796  | 31345931  | 31346599  | 31354203  | 31354991 |
| 174 NA18563 | [2515685 chr6 | 6 | 31360730  | 31427527  | 66798 | 50  | 0.417621  | 0.01796  | 31360200  | 31361261  | 31427319  | 31427731 |
| 175 NA18563 | [2515685 chr6 | 6 | 31467241  | 31559402  | 92162 | 78  | -0.575647 | 0.016763 | 31466904  | 31467579  | 31559009  | 31559791 |
| 176 NA18563 | [2515685 chr6 | 6 | 31561513  | 31584294  | 22782 | 27  | -0.276072 | 0.02878  | 31561240  | 31561787  | 31584128  | 3158446  |
| 177 NA18563 | [2515685 chr6 | 6 | 32557802  | 32558865  | 1064  | 2   | 0.683202  | 0.115277 | 32557647  | 32557958  | 32558698  | 32559031 |
| 178 NA18563 | [2515685 chr6 | 6 | 32561866  | 32586862  | 24997 | 6   | -0.55453  | 0.091601 | 32560230  | 32563503  | 32586127  | 32587591 |
| 179 NA18563 | [2515685 chr6 | 6 | 32605125  | 32605958  | 834   | 2   | -0.838683 | 0.118144 | 32604923  | 32605328  | 32605760  | 32606151 |
| 180 NA18563 | [2515685 chr6 | 6 | 32610864  | 32617040  | 6177  | 2   | -0.465753 | 0.084951 | 32609832  | 32611897  | 32613543  | 3262657  |
| 181 NA18563 | [2515685 chr6 | 6 | 32653862  | 32654720  | 859   | 2   | 1.414201  | 0.180721 | 32653679  | 32654046  | 32654460  | 32654981 |
| 182 NA18563 | [2515685 chr6 | 6 | 32666229  | 32667673  | 1445  | 3   | 0.665278  | 0.080804 | 32665899  | 32666560  | 32667507  | 32667831 |
| 183 NA18563 | [2515685 chr6 | 6 | 32702716  | 32705737  | 3022  | 3   | -0.637855 | 0.075694 | 32702285  | 32703148  | 32704019  | 32707451 |
| 184 NA18563 | [2515685 chr6 | 6 | 32712337  | 32728733  | 16397 | 16  | 0.413214  | 0.025883 | 32712193  | 32712482  | 32728515  | 32728951 |
| 185 NA18563 | [2515685 chr6 | 6 | 32735984  | 32744343  | 8360  | 14  | 0.413214  | 0.025883 | 32735718  | 32736251  | 32744136  | 32744551 |
| 186 NA18563 | [2515685 chr6 | 6 | 46905194  | 46933520  | 28327 | 29  | 0.371829  | 0.027762 | 46904923  | 46905466  | 46933139  | 46933901 |
| 187 NA18563 | [2515685 chr6 | 6 | 50667151  | 50669871  | 2721  | 5   | -0.758802 | 0.06867  | 50666781  | 50667522  | 50669532  | 50670211 |
| 188 NA18563 | [2515685 chr6 | 6 | 54036900  | 54042384  | 5485  | 5   | 3.317717  | 0.129948 | 54036573  | 54037227  | 54041771  | 54042991 |
| 189 NA18563 | [2515685 chr6 | 6 | 75615700  | 75616876  | 1177  | 2   | -0.623163 | 0.114415 | 75615505  | 75615895  | 75616682  | 75617071 |
| 190 NA18563 | [2515685 chr6 | 6 | 77495034  | 77513508  | 18475 | 12  | 0.711708  | 0.047232 | 77493568  | 77496500  | 77510011  | 77517691 |
| 191 NA18563 | [2515685 chr6 | 6 | 79023318  | 79093263  | 69946 | 70  | 0.771041  | 0.0187   | 79022028  | 79024609  | 79091909  | 79094611 |
| 192 NA18563 | [2515685 chr6 | 6 | 143947824 | 143952380 | 4557  | 3   | 0.98591   | 0.090242 | 143946997 | 143948651 | 143951280 | 14395348 |
| 193 NA18563 | [2515685 chr6 | 6 | 143998763 | 144001320 | 2558  | 2   | 0.737009  | 0.104573 | 143997938 | 143999589 | 144000924 | 14400171 |
| 194 NA18563 | [2515685 chr6 | 6 | 151447718 | 151463390 | 15673 | 18  | 0.259208  | 0.032777 | 151447461 | 151447975 | 151462010 | 15146477 |

|             |               |   |           |           |        |     |           |          |           |           |           |           |
|-------------|---------------|---|-----------|-----------|--------|-----|-----------|----------|-----------|-----------|-----------|-----------|
| 195 NA18563 | [2515685 chr6 | 6 | 160997684 | 160998906 | 1223   | 2   | 0.630054  | 0.110365 | 160997465 | 160997903 | 160998551 | 16099926  |
| 196 NA18563 | [2515685 chr6 | 6 | 161001907 | 161038394 | 36488  | 62  | 0.679144  | 0.015015 | 161001167 | 161002648 | 161038184 | 16103860  |
| 197 NA18563 | [2515685 chr6 | 6 | 168453011 | 168456762 | 3752   | 3   | 0.46804   | 0.081185 | 168452611 | 168453411 | 168456200 | 16845732  |
| 198 NA18563 | [2515685 chr6 | 6 | 168780035 | 168781989 | 1955   | 4   | -0.741482 | 0.072984 | 168779504 | 168780567 | 168781555 | 16878242  |
| 199 NA18563 | [2515685 chr6 | 6 | 170603879 | 170604666 | 788    | 2   | -0.91327  | 0.102725 | 170603541 | 170604217 | 170604339 | 17060499  |
| 200 NA18563 | [2515685 chr7 | 7 | 113212    | 116416    | 3205   | 14  | -0.443925 | 0.043142 | 113146    | 113279    | 116290    | 116543    |
| 201 NA18563 | [2515685 chr7 | 7 | 246731    | 254518    | 7788   | 10  | -0.782029 | 0.050306 | 246346    | 247117    | 254199    | 254838    |
| 202 NA18563 | [2515685 chr7 | 7 | 1084125   | 1086660   | 2536   | 15  | 0.406199  | 0.037208 | 1083752   | 1084499   | 1085871   | 1087445   |
| 203 NA18563 | [2515685 chr7 | 7 | 3384111   | 3392456   | 8346   | 8   | 0.782827  | 0.056397 | 3383451   | 3384772   | 3390107   | 3395615   |
| 204 NA18563 | [2515685 chr7 | 7 | 12297894  | 12298675  | 782    | 5   | -0.562195 | 0.072503 | 12297829  | 12297960  | 12298540  | 12298817  |
| 205 NA18563 | [2515685 chr7 | 7 | 15002967  | 15009839  | 6873   | 3   | -0.425399 | 0.08365  | 15002468  | 15003467  | 15009610  | 15010065  |
| 206 NA18563 | [2515685 chr7 | 7 | 16122095  | 16178350  | 56256  | 40  | -0.728049 | 0.024121 | 16121759  | 16122432  | 16178166  | 16178531  |
| 207 NA18563 | [2515685 chr7 | 7 | 37647977  | 37657848  | 9872   | 2   | -0.623725 | 0.084078 | 37646226  | 37649728  | 37655499  | 37719607  |
| 208 NA18563 | [2515685 chr7 | 7 | 38055826  | 38060182  | 4357   | 5   | -0.3389   | 0.065074 | 38055479  | 38056174  | 38059633  | 38060731  |
| 209 NA18563 | [2515685 chr7 | 7 | 43783234  | 43789873  | 6640   | 10  | 0.468133  | 0.04156  | 43782657  | 43783812  | 43789550  | 43790191  |
| 210 NA18563 | [2515685 chr7 | 7 | 56415684  | 56546423  | 130740 | 5   | -0.542267 | 0.062364 | 56286086  | 56418033  | 56546115  | 56546731  |
| 211 NA18563 | [2515685 chr7 | 7 | 56652639  | 56670853  | 18215  | 15  | 0.340053  | 0.033349 | 56652228  | 56653051  | 56670516  | 56671119  |
| 212 NA18563 | [2515685 chr7 | 7 | 62131323  | 62135875  | 4553   | 9   | -0.469461 | 0.047854 | 62130670  | 62131977  | 62135619  | 62136131  |
| 213 NA18563 | [2515685 chr7 | 7 | 62157793  | 62192683  | 34891  | 97  | -0.251026 | 0.014505 | 62157697  | 62157889  | 62192434  | 62192931  |
| 214 NA18563 | [2515685 chr7 | 7 | 62223588  | 62249103  | 25516  | 98  | -0.32903  | 0.014808 | 62223573  | 62223604  | 62248187  | 62250015  |
| 215 NA18563 | [2515685 chr7 | 7 | 62308061  | 62333667  | 25607  | 98  | -0.331349 | 0.014818 | 62307145  | 62308978  | 62333652  | 62333626  |
| 216 NA18563 | [2515685 chr7 | 7 | 62651575  | 62670112  | 18538  | 9   | 0.344329  | 0.038818 | 62650114  | 62653036  | 62667763  | 62673261  |
| 217 NA18563 | [2515685 chr7 | 7 | 63995985  | 64010720  | 14736  | 18  | 0.289461  | 0.035458 | 63995676  | 63996294  | 64010307  | 64011131  |
| 218 NA18563 | [2515685 chr7 | 7 | 64029672  | 64045487  | 15816  | 45  | -0.273658 | 0.021159 | 64029291  | 64030053  | 64045069  | 64045901  |
| 219 NA18563 | [2515685 chr7 | 7 | 64464087  | 64481591  | 17505  | 46  | -0.262307 | 0.020739 | 64463669  | 64464506  | 64481417  | 64481761  |
| 220 NA18563 | [2515685 chr7 | 7 | 64538610  | 64556662  | 18053  | 48  | -0.253441 | 0.020133 | 64537873  | 64539348  | 64556244  | 64557081  |
| 221 NA18563 | [2515685 chr7 | 7 | 64690171  | 64725545  | 35375  | 39  | 0.38469   | 0.022629 | 64689761  | 64690582  | 64725209  | 64725881  |
| 222 NA18563 | [2515685 chr7 | 7 | 71711961  | 71720060  | 8100   | 5   | -0.308109 | 0.057672 | 71711906  | 71712017  | 71718808  | 71721311  |
| 223 NA18563 | [2515685 chr7 | 7 | 78976724  | 78979484  | 2761   | 2   | -0.605572 | 0.117532 | 78974722  | 78978727  | 78979227  | 78979741  |
| 224 NA18563 | [2515685 chr7 | 7 | 89455601  | 89456632  | 1032   | 2   | 4.524224  | 0.217109 | 89455373  | 89455830  | 89456225  | 89457031  |
| 225 NA18563 | [2515685 chr7 | 7 | 90676411  | 90686518  | 10108  | 14  | -0.792918 | 0.043484 | 90674727  | 90678095  | 90685238  | 90687791  |
| 226 NA18563 | [2515685 chr7 | 7 | 92971481  | 92976895  | 5415   | 4   | 0.694169  | 0.085493 | 92971060  | 92971903  | 92975569  | 92978221  |
| 227 NA18563 | [2515685 chr7 | 7 | 101718078 | 101926673 | 208596 | 306 | 0.257273  | 0.007135 | 101717515 | 101718641 | 101926197 | 101927151 |
| 228 NA18563 | [2515685 chr7 | 7 | 109034785 | 109046722 | 11938  | 9   | 1.889638  | 0.075878 | 109024063 | 109037134 | 109046491 | 109046951 |
| 229 NA18563 | [2515685 chr7 | 7 | 109776378 | 109782655 | 6278   | 5   | 0.814868  | 0.074424 | 109775821 | 109776936 | 109782301 | 109783011 |
| 230 NA18563 | [2515685 chr7 | 7 | 133245202 | 133257358 | 12157  | 13  | 1.765175  | 0.064382 | 133244207 | 133246197 | 133255009 | 133260931 |
| 231 NA18563 | [2515685 chr7 | 7 | 141193689 | 141199500 | 5812   | 3   | -0.535562 | 0.092089 | 141193249 | 141194130 | 141199191 | 141199811 |
| 232 NA18563 | [2515685 chr7 | 7 | 141218636 | 141251227 | 32592  | 35  | -0.584351 | 0.026817 | 141217990 | 141219282 | 141250935 | 141251511 |
| 233 NA18563 | [2515685 chr7 | 7 | 141495319 | 141505136 | 9818   | 12  | -0.40095  | 0.04078  | 141494721 | 141495918 | 141504428 | 141505841 |
| 234 NA18563 | [2515685 chr7 | 7 | 141505136 | 141521152 | 16017  | 19  | -1.402593 | 0.046382 | 141504428 | 141505844 | 141520892 | 141521411 |
| 235 NA18563 | [2515685 chr7 | 7 | 141521152 | 141527443 | 6292   | 10  | -0.379545 | 0.043634 | 141520892 | 141521412 | 141527046 | 141527841 |
| 236 NA18563 | [2515685 chr7 | 7 | 141759291 | 141761893 | 2603   | 3   | -0.483919 | 0.088215 | 141758892 | 141759690 | 141761589 | 141762191 |
| 237 NA18563 | [2515685 chr7 | 7 | 141859547 | 141861635 | 2089   | 3   | -0.454829 | 0.080718 | 141859116 | 141859979 | 141861094 | 141862171 |
| 238 NA18563 | [2515685 chr7 | 7 | 143439335 | 143442526 | 3192   | 5   | -0.444495 | 0.062261 | 143438606 | 143440065 | 143442497 | 143442551 |
| 239 NA18563 | [2515685 chr7 | 7 | 156976112 | 156978464 | 2353   | 2   | 0.659404  | 0.096874 | 156975812 | 156976413 | 15697896  | 156979031 |
| 240 NA18563 | [2515685 chr7 | 7 | 157023614 | 157027930 | 4317   | 7   | 0.274138  | 0.054175 | 157023242 | 157023987 | 157027451 | 157028401 |
| 241 NA18563 | [2515685 chr7 | 7 | 158207288 | 158209880 | 2593   | 2   | 1.339222  | 0.128798 | 158206344 | 158208233 | 158209333 | 158210421 |
| 242 NA18563 | [2515685 chr7 | 7 | 158617060 | 158624377 | 7318   | 6   | 0.810478  | 0.066413 | 158616763 | 158617357 | 158622028 | 158626721 |
| 243 NA18563 | [2515685 chr8 | 8 | 4398      | 11588     | 7191   | 3   | 0.465913  | 0.088522 | 1752      | 7045      | 10326     | 12850     |
| 244 NA18563 | [2515685 chr8 | 8 | 1328256   | 1343509   | 15254  | 45  | -0.891342 | 0.020493 | 1327688   | 1328824   | 1342795   | 1344224   |
| 245 NA18563 | [2515685 chr8 | 8 | 1396135   | 1398803   | 2669   | 4   | -0.477951 | 0.077959 | 1395585   | 1396686   | 1398426   | 1399187   |
| 246 NA18563 | [2515685 chr8 | 8 | 2238736   | 2253791   | 15056  | 10  | 0.713859  | 0.050445 | 2233839   | 2241488   | 2251039   | 2257521   |
| 247 NA18563 | [2515685 chr8 | 8 | 4110204   | 4112526   | 2323   | 2   | 3.599407  | 0.20928  | 4109692   | 4110717   | 4112031   | 4113021   |
| 248 NA18563 | [2515685 chr8 | 8 | 5582875   | 5594011   | 11137  | 9   | 0.756906  | 0.047763 | 5582615   | 5583135   | 5592820   | 55952031  |
| 249 NA18563 | [2515685 chr8 | 8 | 6813967   | 6815529   | 1563   | 2   | -0.977703 | 0.099645 | 6813560   | 6814375   | 6815199   | 6815860   |



|             |               |   |           |           |        |     |           |          |           |           |           |           |
|-------------|---------------|---|-----------|-----------|--------|-----|-----------|----------|-----------|-----------|-----------|-----------|
| 250 NA18563 | [2515685 chr8 | 8 | 7094852   | 7268617   | 173766 | 407 | 0.41321   | 0.003232 | 7092427   | 7097278   | 7267878   | 7269356   |
| 251 NA18563 | [2515685 chr8 | 8 | 7277150   | 7430731   | 153582 | 356 | 0.41321   | 0.003232 | 7276887   | 7277413   | 7430300   | 7431162   |
| 252 NA18563 | [2515685 chr8 | 8 | 7603394   | 7774981   | 171588 | 477 | 0.41321   | 0.003232 | 7600972   | 7605817   | 7774750   | 7775212   |
| 253 NA18563 | [2515685 chr8 | 8 | 7777281   | 7852277   | 74997  | 106 | 0.41321   | 0.003232 | 7777081   | 7777481   | 7852194   | 7852367   |
| 254 NA18563 | [2515685 chr8 | 8 | 7859344   | 7930292   | 70949  | 192 | 0.41321   | 0.003232 | 7857164   | 7857524   | 7930155   | 7930425   |
| 255 NA18563 | [2515685 chr8 | 8 | 11988427  | 12322179  | 333753 | 414 | 0.273069  | 0.006423 | 11988287  | 11988567  | 12321906  | 12322452  |
| 256 NA18563 | [2515685 chr8 | 8 | 13224516  | 13572676  | 348161 | 8   | 0.26925   | 0.053211 | 13135929  | 13227268  | 13571890  | 13573462  |
| 257 NA18563 | [2515685 chr8 | 8 | 17671955  | 17673956  | 2002   | 3   | 0.410744  | 0.07341  | 17671619  | 17672291  | 17673575  | 17674331  |
| 258 NA18563 | [2515685 chr8 | 8 | 18900549  | 18901909  | 1361   | 2   | -0.609162 | 0.098444 | 18900138  | 18900960  | 18901577  | 18902242  |
| 259 NA18563 | [2515685 chr8 | 8 | 20022286  | 20024771  | 2486   | 2   | -0.673772 | 0.120105 | 20021082  | 20023491  | 20024338  | 20025202  |
| 260 NA18563 | [2515685 chr8 | 8 | 25028407  | 25046917  | 18511  | 15  | -0.898181 | 0.039065 | 25027885  | 25028930  | 25046777  | 25047052  |
| 261 NA18563 | [2515685 chr8 | 8 | 39351178  | 39506673  | 155496 | 163 | 0.726485  | 0.012492 | 39350826  | 39351530  | 39505284  | 39508062  |
| 262 NA18563 | [2515685 chr8 | 8 | 58278355  | 58289214  | 10860  | 9   | 0.924299  | 0.044206 | 58277116  | 58279595  | 58288084  | 58290341  |
| 263 NA18563 | [2515685 chr8 | 8 | 85423649  | 85431920  | 8272   | 7   | 0.909547  | 0.058861 | 85423043  | 85424256  | 85431347  | 85432492  |
| 264 NA18563 | [2515685 chr8 | 8 | 86742169  | 86910255  | 168087 | 99  | 0.422057  | 0.012362 | 86741757  | 86742581  | 86910002  | 86910502  |
| 265 NA18563 | [2515685 chr8 | 8 | 120222662 | 120229952 | 7291   | 6   | 0.891317  | 0.063484 | 120218251 | 120225414 | 120229434 | 120230471 |
| 266 NA18563 | [2515685 chr9 | 9 | 53008     | 312573    | 259566 | 395 | 0.26736   | 0.007077 | 52805     | 53212     | 312407    | 312740    |
| 267 NA18563 | [2515685 chr9 | 9 | 4517095   | 4522909   | 5815   | 5   | -0.85176  | 0.071178 | 4516442   | 4517748   | 4520549   | 4556030   |
| 268 NA18563 | [2515685 chr9 | 9 | 28836246  | 28838385  | 2140   | 2   | -0.889208 | 0.101814 | 28835879  | 28836613  | 28837661  | 28839110  |
| 269 NA18563 | [2515685 chr9 | 9 | 38763857  | 38952823  | 188967 | 331 | -0.25789  | 0.007906 | 38761896  | 38765818  | 38952514  | 38953132  |
| 270 NA18563 | [2515685 chr9 | 9 | 39305054  | 39345306  | 40253  | 53  | 0.418792  | 0.016855 | 39304100  | 39306009  | 39345148  | 39345462  |
| 271 NA18563 | [2515685 chr9 | 9 | 39616339  | 39656604  | 40266  | 55  | 0.419895  | 0.016521 | 39615385  | 39617294  | 39656446  | 39656762  |
| 272 NA18563 | [2515685 chr9 | 9 | 39811790  | 39824227  | 12438  | 21  | 0.458507  | 0.029959 | 39810439  | 39813141  | 39824073  | 39824382  |
| 273 NA18563 | [2515685 chr9 | 9 | 39864986  | 39866101  | 1116   | 5   | 0.548319  | 0.0527   | 39864795  | 39865177  | 39866022  | 39866618  |
| 274 NA18563 | [2515685 chr9 | 9 | 39897164  | 39898076  | 913    | 3   | 0.496704  | 0.065546 | 39897034  | 39897294  | 39897666  | 39898482  |
| 275 NA18563 | [2515685 chr9 | 9 | 40389069  | 40428992  | 39924  | 60  | 0.438565  | 0.016765 | 40387935  | 40390203  | 40428980  | 40429002  |
| 276 NA18563 | [2515685 chr9 | 9 | 40561572  | 40562485  | 914    | 3   | 0.496704  | 0.065546 | 40561162  | 40561983  | 40562355  | 40562612  |
| 277 NA18563 | [2515685 chr9 | 9 | 40731929  | 40736193  | 4265   | 5   | 0.544587  | 0.063478 | 40731597  | 40732262  | 40735341  | 40737042  |
| 278 NA18563 | [2515685 chr9 | 9 | 40745481  | 40793368  | 47888  | 97  | 0.285597  | 0.01361  | 40745300  | 40745662  | 40793266  | 40793472  |
| 279 NA18563 | [2515685 chr9 | 9 | 40887009  | 40928556  | 41548  | 49  | 0.424746  | 0.018053 | 40886852  | 40887167  | 40928274  | 40928832  |
| 280 NA18563 | [2515685 chr9 | 9 | 41375485  | 41417315  | 41831  | 62  | 0.424947  | 0.016105 | 41375203  | 41375767  | 41417157  | 41417472  |
| 281 NA18563 | [2515685 chr9 | 9 | 41566824  | 41567737  | 914    | 3   | 0.496704  | 0.065546 | 41566414  | 41567235  | 41567607  | 41567862  |
| 282 NA18563 | [2515685 chr9 | 9 | 41598793  | 41599908  | 1116   | 5   | 0.548319  | 0.0527   | 41598714  | 41598873  | 41599718  | 41600092  |
| 283 NA18563 | [2515685 chr9 | 9 | 41640668  | 41653902  | 13235  | 20  | 0.446865  | 0.030433 | 41640514  | 41640823  | 41651748  | 41656052  |
| 284 NA18563 | [2515685 chr9 | 9 | 41706786  | 41826517  | 119732 | 161 | 0.274629  | 0.010422 | 41706748  | 41706824  | 41824301  | 41828732  |
| 285 NA18563 | [2515685 chr9 | 9 | 41868104  | 41895986  | 27883  | 17  | 0.399273  | 0.017879 | 41862823  | 41870464  | 41895482  | 41896492  |
| 286 NA18563 | [2515685 chr9 | 9 | 41904684  | 41968114  | 63431  | 31  | 0.399273  | 0.017879 | 41904585  | 41904783  | 41968070  | 41968152  |
| 287 NA18563 | [2515685 chr9 | 9 | 42024122  | 42028385  | 4264   | 5   | 0.544586  | 0.063478 | 42023271  | 42024974  | 42028053  | 42028712  |
| 288 NA18563 | [2515685 chr9 | 9 | 42043738  | 42056855  | 13118  | 20  | 0.391949  | 0.029949 | 42041547  | 42045930  | 42056700  | 42057012  |
| 289 NA18563 | [2515685 chr9 | 9 | 42074739  | 42078332  | 3594   | 7   | 0.7884    | 0.047875 | 42074446  | 42075033  | 42078087  | 42078572  |
| 290 NA18563 | [2515685 chr9 | 9 | 42078734  | 42091335  | 12602  | 22  | 0.395011  | 0.027674 | 42078578  | 42078891  | 42091042  | 42091622  |
| 291 NA18563 | [2515685 chr9 | 9 | 42121802  | 42122916  | 1115   | 5   | 0.548319  | 0.0527   | 42121612  | 42121992  | 42122837  | 42122992  |
| 292 NA18563 | [2515685 chr9 | 9 | 42153970  | 42154882  | 913    | 3   | 0.496704  | 0.065546 | 42153840  | 42154100  | 42154472  | 42155292  |
| 293 NA18563 | [2515685 chr9 | 9 | 42278512  | 42340392  | 61881  | 101 | 0.433438  | 0.012991 | 42223890  | 42228072  | 42338032  | 42343142  |
| 294 NA18563 | [2515685 chr9 | 9 | 42385054  | 42399534  | 14481  | 26  | 0.375007  | 0.029257 | 42385030  | 42385079  | 42399193  | 42399872  |
| 295 NA18563 | [2515685 chr9 | 9 | 42425098  | 42425909  | 812    | 3   | 0.5713    | 0.079694 | 42424786  | 42425411  | 42425763  | 42426052  |
| 296 NA18563 | [2515685 chr9 | 9 | 42451083  | 42634793  | 183711 | 228 | 0.265181  | 0.008764 | 42450982  | 42451185  | 42634582  | 42635002  |
| 297 NA18563 | [2515685 chr9 | 9 | 42691196  | 42711714  | 20519  | 44  | 0.315196  | 0.019354 | 42690984  | 42691408  | 42711636  | 42711792  |
| 298 NA18563 | [2515685 chr9 | 9 | 42717179  | 42899907  | 182729 | 282 | 0.321655  | 0.007281 | 42717021  | 42717338  | 42899788  | 42900022  |
| 299 NA18563 | [2515685 chr9 | 9 | 42952196  | 42982728  | 30533  | 35  | 0.341701  | 0.022199 | 42951733  | 42952660  | 42982563  | 42982892  |
| 300 NA18563 | [2515685 chr9 | 9 | 43039177  | 43062500  | 23324  | 28  | 0.446796  | 0.025715 | 43038461  | 43039893  | 43062412  | 43062582  |
| 301 NA18563 | [2515685 chr9 | 9 | 43261556  | 43272409  | 10854  | 14  | 0.375836  | 0.03604  | 43213571  | 43263916  | 43271361  | 43273452  |
| 302 NA18563 | [2515685 chr9 | 9 | 43279310  | 43474410  | 195101 | 322 | 0.436022  | 0.006485 | 43279088  | 43279533  | 43473902  | 43474912  |
| 303 NA18563 | [2515685 chr9 | 9 | 43487926  | 43559337  | 71412  | 142 | 0.436022  | 0.006485 | 43486176  | 43489677  | 43556977  | 43562092  |
| 304 NA18563 | [2515685 chr9 | 9 | 43600478  | 43618254  | 17777  | 31  | 0.393046  | 0.025974 | 43596212  | 43602838  | 43617940  | 43618562  |

|             |                |    |           |           |          |      |           |          |           |           |           |           |
|-------------|----------------|----|-----------|-----------|----------|------|-----------|----------|-----------|-----------|-----------|-----------|
| 305 NA18563 | [2515685 chr9  | 9  | 43645471  | 43647943  | 2473     | 5    | 0.461422  | 0.054148 | 43645158  | 43645784  | 43647520  | 43648361  |
| 306 NA18563 | [2515685 chr9  | 9  | 44040084  | 44063437  | 23354    | 17   | -0.326329 | 0.030265 | 43969513  | 44042444  | 44063415  | 44063451  |
| 307 NA18563 | [2515685 chr9  | 9  | 44309200  | 44609440  | 300241   | 367  | 0.558776  | 0.007554 | 44308845  | 44309556  | 44608904  | 44609971  |
| 308 NA18563 | [2515685 chr9  | 9  | 44692815  | 44696984  | 4170     | 16   | 0.266188  | 0.033966 | 44692675  | 44692956  | 44696974  | 44696991  |
| 309 NA18563 | [2515685 chr9  | 9  | 44912782  | 44916617  | 3836     | 7    | 0.312011  | 0.052029 | 44912772  | 44912792  | 44916432  | 44916801  |
| 310 NA18563 | [2515685 chr9  | 9  | 45006425  | 45015999  | 9575     | 14   | 0.559574  | 0.036499 | 45005889  | 45006961  | 45013639  | 45065291  |
| 311 NA18563 | [2515685 chr9  | 9  | 45155016  | 65074908  | 19919893 | 968  | 0.413721  | 0.004583 | 45153297  | 45156736  | 65072548  | 65273241  |
| 312 NA18563 | [2515685 chr9  | 9  | 65417859  | 65429502  | 11644    | 17   | 0.545849  | 0.033501 | 65417323  | 65418395  | 65429301  | 65429701  |
| 313 NA18563 | [2515685 chr9  | 9  | 65573374  | 65600341  | 26968    | 35   | 0.336821  | 0.023815 | 65540141  | 65575734  | 65600137  | 65600541  |
| 314 NA18563 | [2515685 chr9  | 9  | 65620667  | 65790225  | 169559   | 89   | 0.426817  | 0.015365 | 65620027  | 65621307  | 65789584  | 65790861  |
| 315 NA18563 | [2515685 chr9  | 9  | 65810533  | 65837505  | 26973    | 30   | 0.344857  | 0.025504 | 65810329  | 65810737  | 65835145  | 65842261  |
| 316 NA18563 | [2515685 chr9  | 9  | 66297437  | 66340294  | 42858    | 52   | 0.306839  | 0.019678 | 66283602  | 66299797  | 66340261  | 66340321  |
| 317 NA18563 | [2515685 chr9  | 9  | 66340999  | 66760108  | 419110   | 587  | 0.468364  | 0.005999 | 66340327  | 66341671  | 66759721  | 66760491  |
| 318 NA18563 | [2515685 chr9  | 9  | 66902538  | 66934504  | 31967    | 51   | 0.316367  | 0.018178 | 66902253  | 66902824  | 66932710  | 66936291  |
| 319 NA18563 | [2515685 chr9  | 9  | 67159955  | 67172623  | 12669    | 19   | 0.401051  | 0.031618 | 67159297  | 67160614  | 67170826  | 67174421  |
| 320 NA18563 | [2515685 chr9  | 9  | 67380384  | 67534798  | 154415   | 210  | 0.427627  | 0.009929 | 67380092  | 67380676  | 67534158  | 67535431  |
| 321 NA18563 | [2515685 chr9  | 9  | 67555118  | 67575889  | 20772    | 38   | 0.37227   | 0.022573 | 67554914  | 67555322  | 67575637  | 67576141  |
| 322 NA18563 | [2515685 chr9  | 9  | 67935738  | 68145019  | 209282   | 306  | 0.47292   | 0.008289 | 67935695  | 67935782  | 68144983  | 68145051  |
| 323 NA18563 | [2515685 chr9  | 9  | 68225461  | 68242900  | 17440    | 28   | 0.36423   | 0.026747 | 68223878  | 68227044  | 68242469  | 68243331  |
| 324 NA18563 | [2515685 chr9  | 9  | 84052817  | 84144717  | 91901    | 2    | -0.619795 | 0.108378 | 83978854  | 84055177  | 84142357  | 84248691  |
| 325 NA18563 | [2515685 chr9  | 9  | 112902065 | 112933534 | 31470    | 43   | 0.38495   | 0.018574 | 112901557 | 112902574 | 112932917 | 112934151 |
| 326 NA18563 | [2515685 chr9  | 9  | 135438421 | 135444067 | 5647     | 2    | 2.697999  | 0.144691 | 135383632 | 135440781 | 135443016 | 135445111 |
| 327 NA18563 | [2515685 chr9  | 9  | 138397327 | 138399638 | 2312     | 12   | -0.412203 | 0.045997 | 138397201 | 138397454 | 138399572 | 138399701 |
| 328 NA18563 | [2515685 chr10 | 10 | 170571    | 172369    | 1799     | 2    | 0.815367  | 0.092958 | 170341    | 170801    | 171237    | 173501    |
| 329 NA18563 | [2515685 chr10 | 10 | 6693908   | 6703893   | 9986     | 8    | 0.697566  | 0.056228 | 6692231   | 6695585   | 6703779   | 6704001   |
| 330 NA18563 | [2515685 chr10 | 10 | 19788068  | 19790461  | 2394     | 3    | -0.446647 | 0.07598  | 19787726  | 19788411  | 19789952  | 19790971  |
| 331 NA18563 | [2515685 chr10 | 10 | 20036833  | 20038315  | 1483     | 2    | -0.763673 | 0.113447 | 20036464  | 20037202  | 20038007  | 20038621  |
| 332 NA18563 | [2515685 chr10 | 10 | 20868210  | 20886073  | 17864    | 20   | -0.742862 | 0.034263 | 20866873  | 20869547  | 20883329  | 20890941  |
| 333 NA18563 | [2515685 chr10 | 10 | 45490261  | 45519433  | 29173    | 73   | -0.25005  | 0.014702 | 45489966  | 45490557  | 45518088  | 45520771  |
| 334 NA18563 | [2515685 chr10 | 10 | 45642635  | 45650845  | 8211     | 18   | -0.37311  | 0.030791 | 45642415  | 45642856  | 45650735  | 45650951  |
| 335 NA18563 | [2515685 chr10 | 10 | 45711301  | 45717330  | 6030     | 19   | 0.315348  | 0.029396 | 45710995  | 45711607  | 45717105  | 45717551  |
| 336 NA18563 | [2515685 chr10 | 10 | 46098400  | 47245572  | 1147173  | 1845 | -0.340252 | 0.002089 | 46098202  | 46098599  | 47245089  | 47246051  |
| 337 NA18563 | [2515685 chr10 | 10 | 47577931  | 47903900  | 325970   | 516  | -0.340252 | 0.002089 | 47575187  | 47725982  | 47903417  | 47904381  |
| 338 NA18563 | [2515685 chr10 | 10 | 48485301  | 48936140  | 450840   | 708  | -0.340252 | 0.002089 | 48485103  | 48485500  | 48935745  | 48936531  |
| 339 NA18563 | [2515685 chr10 | 10 | 50743194  | 50749065  | 5872     | 15   | 0.365778  | 0.032882 | 50743046  | 50743342  | 50748834  | 50749291  |
| 340 NA18563 | [2515685 chr10 | 10 | 50896262  | 50904455  | 8194     | 19   | -0.379583 | 0.030035 | 50896042  | 50896483  | 50904345  | 50904561  |
| 341 NA18563 | [2515685 chr10 | 10 | 50964779  | 50970783  | 6005     | 18   | 0.332768  | 0.030213 | 50964473  | 50965085  | 50970558  | 50971001  |
| 342 NA18563 | [2515685 chr10 | 10 | 51119630  | 51163422  | 43793    | 95   | -0.286256 | 0.012983 | 51119365  | 51119895  | 51162458  | 51164381  |
| 343 NA18563 | [2515685 chr10 | 10 | 51363953  | 51369982  | 6030     | 19   | 0.31535   | 0.029396 | 51363728  | 51364178  | 51369676  | 51370281  |
| 344 NA18563 | [2515685 chr10 | 10 | 51431948  | 51433203  | 1256     | 5    | -0.495027 | 0.06121  | 51431739  | 51432158  | 51433133  | 51433271  |
| 345 NA18563 | [2515685 chr10 | 10 | 52136987  | 52143410  | 6424     | 9    | -0.303254 | 0.042333 | 52136355  | 52137619  | 52140666  | 52165941  |
| 346 NA18563 | [2515685 chr10 | 10 | 55688769  | 55692618  | 3850     | 3    | -0.363199 | 0.065546 | 55655147  | 55691513  | 55692618  | 55692611  |
| 347 NA18563 | [2515685 chr10 | 10 | 56117212  | 56139275  | 22064    | 20   | -0.914908 | 0.034564 | 56115764  | 56118661  | 56138931  | 56139611  |
| 348 NA18563 | [2515685 chr10 | 10 | 66977355  | 66985193  | 7839     | 8    | -0.923094 | 0.063079 | 66976803  | 66977908  | 66984894  | 66985491  |
| 349 NA18563 | [2515685 chr10 | 10 | 81143634  | 81173619  | 29986    | 29   | -0.257228 | 0.022511 | 81142993  | 81144276  | 81171386  | 81175851  |
| 350 NA18563 | [2515685 chr10 | 10 | 81381739  | 81395770  | 14032    | 7    | -0.280823 | 0.047028 | 81381316  | 81382162  | 81393026  | 81400071  |
| 351 NA18563 | [2515685 chr10 | 10 | 81622571  | 81625981  | 3411     | 7    | -0.284978 | 0.048199 | 81621713  | 81623429  | 81625622  | 81626341  |
| 352 NA18563 | [2515685 chr10 | 10 | 81662845  | 81669493  | 6649     | 10   | -0.326969 | 0.045004 | 81662614  | 81663077  | 81669128  | 81669851  |
| 353 NA18563 | [2515685 chr10 | 10 | 88747655  | 88776727  | 29073    | 46   | -0.265678 | 0.020013 | 88747521  | 88747789  | 88776434  | 88777021  |
| 354 NA18563 | [2515685 chr10 | 10 | 88819172  | 88834972  | 15801    | 21   | -0.282618 | 0.03044  | 88818864  | 88819480  | 88834493  | 88835451  |
| 355 NA18563 | [2515685 chr10 | 10 | 88866216  | 88963891  | 97676    | 108  | -0.536931 | 0.013288 | 88865617  | 88866816  | 88963564  | 88964211  |
| 356 NA18563 | [2515685 chr10 | 10 | 89138419  | 89179870  | 41452    | 70   | -0.405585 | 0.016688 | 89137950  | 89138889  | 89179587  | 89180151  |
| 357 NA18563 | [2515685 chr10 | 10 | 124329002 | 124345789 | 16788    | 17   | -0.286983 | 0.032202 | 124328905 | 124329099 | 124345154 | 124346421 |
| 358 NA18563 | [2515685 chr10 | 10 | 124348266 | 124366738 | 18473    | 24   | -0.742273 | 0.025139 | 124348238 | 124348295 | 124366300 | 124367171 |
| 359 NA18563 | [2515685 chr10 | 10 | 133579899 | 133584218 | 4320     | 12   | -0.776324 | 0.042949 | 133579611 | 133580188 | 133583877 | 133584561 |

|             |                |    |           |           |        |     |           |          |           |           |           |          |
|-------------|----------------|----|-----------|-----------|--------|-----|-----------|----------|-----------|-----------|-----------|----------|
| 360 NA18563 | [2515685 chr10 | 10 | 133602364 | 133603160 | 797    | 11  | -0.316604 | 0.040515 | 133602112 | 133602617 | 133602987 | 13360333 |
| 361 NA18563 | [2515685 chr11 | 11 | 2840307   | 2842410   | 2104   | 3   | 0.53843   | 0.082965 | 2839959   | 2840656   | 2841856   | 2842961  |
| 362 NA18563 | [2515685 chr11 | 11 | 3628748   | 3632795   | 4048   | 6   | -2.545562 | 0.090812 | 3625722   | 3631775   | 3632594   | 3632996  |
| 363 NA18563 | [2515685 chr11 | 11 | 5741269   | 5765993   | 24725  | 32  | 2.053466  | 0.03885  | 5741059   | 5741480   | 5765632   | 5766354  |
| 364 NA18563 | [2515685 chr11 | 11 | 11780222  | 11782174  | 1953   | 2   | -0.680373 | 0.097569 | 11779958  | 11780486  | 11781057  | 1178329  |
| 365 NA18563 | [2515685 chr11 | 11 | 18906905  | 18923020  | 16116  | 29  | 0.677688  | 0.027881 | 18906533  | 18907278  | 18919939  | 1892845  |
| 366 NA18563 | [2515685 chr11 | 11 | 28965605  | 28969186  | 3582   | 5   | 3.085907  | 0.140454 | 28965284  | 28965927  | 28968702  | 28969671 |
| 367 NA18563 | [2515685 chr11 | 11 | 48284073  | 48284771  | 699    | 2   | 0.838392  | 0.102516 | 48283862  | 48284285  | 48284572  | 48284971 |
| 368 NA18563 | [2515685 chr11 | 11 | 48997072  | 49001951  | 4880   | 10  | 0.435744  | 0.046733 | 48996760  | 48997384  | 49001459  | 4900244  |
| 369 NA18563 | [2515685 chr11 | 11 | 49667589  | 49715829  | 48241  | 34  | 0.494303  | 0.025292 | 49666851  | 49668327  | 49712748  | 4972198  |
| 370 NA18563 | [2515685 chr11 | 11 | 55124643  | 55212649  | 88007  | 97  | -0.778639 | 0.016053 | 55124460  | 55124827  | 55209568  | 5521575  |
| 371 NA18563 | [2515685 chr11 | 11 | 58566484  | 58611261  | 44778  | 47  | 0.609843  | 0.021797 | 58566228  | 58566741  | 58610975  | 5861154  |
| 372 NA18563 | [2515685 chr11 | 11 | 60721034  | 60772727  | 51694  | 69  | 0.300787  | 0.014887 | 60720112  | 60721956  | 60772548  | 60772901 |
| 373 NA18563 | [2515685 chr11 | 11 | 88266938  | 88303526  | 36589  | 39  | 0.285301  | 0.023888 | 88266424  | 88267453  | 88303291  | 8830376  |
| 374 NA18563 | [2515685 chr11 | 11 | 89184898  | 89189792  | 4895   | 5   | 0.763284  | 0.079115 | 89184243  | 89185554  | 89189177  | 8919040  |
| 375 NA18563 | [2515685 chr11 | 11 | 89444616  | 89446933  | 2318   | 3   | -0.421374 | 0.08093  | 89444373  | 89444860  | 89446514  | 8944735  |
| 376 NA18563 | [2515685 chr11 | 11 | 93334621  | 93341944  | 7324   | 8   | -0.871825 | 0.057216 | 93334320  | 93334923  | 93341681  | 9334220  |
| 377 NA18563 | [2515685 chr11 | 11 | 106744846 | 106746569 | 1724   | 5   | -0.773339 | 0.075567 | 106744561 | 106745131 | 106746367 | 10674677 |
| 378 NA18563 | [2515685 chr11 | 11 | 106747019 | 106751052 | 4034   | 3   | -0.749617 | 0.096235 | 106746772 | 106747267 | 106747971 | 10675483 |
| 379 NA18563 | [2515685 chr11 | 11 | 134107699 | 134110673 | 2975   | 3   | 1.087499  | 0.089842 | 134106591 | 134108808 | 134109982 | 13411136 |
| 380 NA18563 | [2515685 chr12 | 12 | 398598    | 404873    | 6276   | 14  | -0.325705 | 0.03219  | 398035    | 399161    | 401600    | 408146   |
| 381 NA18563 | [2515685 chr12 | 12 | 2116865   | 2127044   | 10180  | 13  | 0.644315  | 0.04176  | 2116538   | 2117192   | 2126809   | 2127279  |
| 382 NA18563 | [2515685 chr12 | 12 | 6113530   | 6117052   | 3523   | 3   | 0.515186  | 0.094523 | 6111640   | 6115421   | 6116289   | 6117816  |
| 383 NA18563 | [2515685 chr12 | 12 | 8265649   | 8269259   | 3611   | 11  | 0.585301  | 0.039949 | 8265478   | 8265821   | 8268864   | 8269654  |
| 384 NA18563 | [2515685 chr12 | 12 | 9439936   | 9446631   | 6696   | 10  | 0.548194  | 0.042624 | 9439574   | 9440298   | 9446000   | 944726   |
| 385 NA18563 | [2515685 chr12 | 12 | 9524239   | 9526454   | 2216   | 2   | 0.777881  | 0.110854 | 9523968   | 9524510   | 9526036   | 952687   |
| 386 NA18563 | [2515685 chr12 | 12 | 9527659   | 9620430   | 92772  | 101 | 1.029509  | 0.01666  | 9526872   | 9528447   | 9619979   | 962088   |
| 387 NA18563 | [2515685 chr12 | 12 | 9646904   | 9649697   | 2794   | 2   | 0.782363  | 0.097368 | 9646692   | 9647116   | 9649433   | 964996   |
| 388 NA18563 | [2515685 chr12 | 12 | 31155331  | 31244780  | 89450  | 84  | 0.698892  | 0.01672  | 31155092  | 31155571  | 31244217  | 3124534  |
| 389 NA18563 | [2515685 chr12 | 12 | 46823282  | 47044529  | 221248 | 230 | 0.466273  | 0.009819 | 46822793  | 46823772  | 47044291  | 47044761 |
| 390 NA18563 | [2515685 chr12 | 12 | 69156923  | 69167885  | 10963  | 11  | 0.614693  | 0.047434 | 69138649  | 69160412  | 69164396  | 6921501  |
| 391 NA18563 | [2515685 chr12 | 12 | 70475445  | 70476812  | 1368   | 2   | -2.714872 | 0.176993 | 70475180  | 70475711  | 70476524  | 7047710  |
| 392 NA18563 | [2515685 chr12 | 12 | 71377197  | 71385813  | 8617   | 4   | -0.365763 | 0.072141 | 71376546  | 71377848  | 71382324  | 7139438  |
| 393 NA18563 | [2515685 chr12 | 12 | 78656134  | 78665261  | 9128   | 9   | 0.475872  | 0.050057 | 78654687  | 78657582  | 78664736  | 7866578  |
| 394 NA18563 | [2515685 chr12 | 12 | 128601598 | 128602937 | 1340   | 2   | -0.681955 | 0.101739 | 128601341 | 128601856 | 128602454 | 12860342 |
| 395 NA18563 | [2515685 chr12 | 12 | 130323338 | 130349864 | 26527  | 23  | -0.51551  | 0.031787 | 130322865 | 130323811 | 130349625 | 13035010 |
| 396 NA18563 | [2515685 chr12 | 12 | 130777013 | 130778340 | 1328   | 2   | 0.681599  | 0.098819 | 130776667 | 130777359 | 130778020 | 13077866 |
| 397 NA18563 | [2515685 chr12 | 12 | 130781181 | 130782379 | 1199   | 2   | 0.701205  | 0.112722 | 130780827 | 130781536 | 130781966 | 13078279 |
| 398 NA18563 | [2515685 chr12 | 12 | 130798727 | 130802870 | 4144   | 5   | -0.808972 | 0.063205 | 130798268 | 130799187 | 130801345 | 13080439 |
| 399 NA18563 | [2515685 chr13 | 13 | 20416271  | 20419264  | 2994   | 4   | -0.409256 | 0.070352 | 20415724  | 20416818  | 20418566  | 2041996  |
| 400 NA18563 | [2515685 chr13 | 13 | 33029573  | 33043421  | 13849  | 9   | 0.837914  | 0.055102 | 33000262  | 33034253  | 33042925  | 3304391  |
| 401 NA18563 | [2515685 chr13 | 13 | 33862844  | 33865211  | 2368   | 2   | 0.665899  | 0.118292 | 33862283  | 33863405  | 33864905  | 3386551  |
| 402 NA18563 | [2515685 chr13 | 13 | 56653890  | 56686136  | 32247  | 30  | -0.875589 | 0.030005 | 56650401  | 56657380  | 56685381  | 5668689  |
| 403 NA18563 | [2515685 chr13 | 13 | 69633905  | 69673289  | 39385  | 42  | 0.791713  | 0.024073 | 69633412  | 69634399  | 69672985  | 6967359  |
| 404 NA18563 | [2515685 chr13 | 13 | 109215660 | 109217089 | 1430   | 5   | -0.547677 | 0.059638 | 109215230 | 109216090 | 109216885 | 10921729 |
| 405 NA18563 | [2515685 chr13 | 13 | 110502383 | 110503129 | 747    | 3   | -0.90309  | 0.09967  | 110502225 | 110502541 | 110502890 | 11050336 |
| 406 NA18563 | [2515685 chr13 | 13 | 113078057 | 113086818 | 8762   | 4   | 0.475367  | 0.074448 | 113077224 | 113078890 | 113082138 | 11309434 |
| 407 NA18563 | [2515685 chr14 | 14 | 18527136  | 18542743  | 15608  | 7   | -0.718457 | 0.05747  | 18526373  | 18527899  | 18541619  | 1854386  |
| 408 NA18563 | [2515685 chr14 | 14 | 18824481  | 18851276  | 26796  | 41  | 0.262998  | 0.021784 | 18824140  | 18824823  | 18850824  | 1885172  |
| 409 NA18563 | [2515685 chr14 | 14 | 19195978  | 19197014  | 1037   | 2   | 0.425627  | 0.08249  | 19195970  | 19195986  | 19196533  | 19197491 |
| 410 NA18563 | [2515685 chr14 | 14 | 19265232  | 19445538  | 180307 | 158 | 0.349765  | 0.010091 | 19261661  | 19268804  | 19445201  | 19445871 |
| 411 NA18563 | [2515685 chr14 | 14 | 19451221  | 19494842  | 43622  | 48  | 0.349765  | 0.010091 | 19449262  | 19453181  | 19494444  | 1949524  |
| 412 NA18563 | [2515685 chr14 | 14 | 19619357  | 19625484  | 6128   | 3   | 3.390535  | 0.20118  | 19612261  | 19624114  | 19625018  | 19625951 |
| 413 NA18563 | [2515685 chr14 | 14 | 27286173  | 27399401  | 113229 | 122 | 0.314934  | 0.01297  | 27285651  | 27286696  | 27399142  | 27399661 |
| 414 NA18563 | [2515685 chr14 | 14 | 32022775  | 32026140  | 3366   | 2   | -0.726255 | 0.119468 | 32022274  | 32023276  | 32023749  | 3202853  |

|             |                |    |           |           |        |     |           |          |           |           |           |           |
|-------------|----------------|----|-----------|-----------|--------|-----|-----------|----------|-----------|-----------|-----------|-----------|
| 415 NA18563 | [2515685 chr14 | 14 | 45143416  | 45144329  | 914    | 2   | 0.622006  | 0.117721 | 45143199  | 45143634  | 45144095  | 4514456-  |
| 416 NA18563 | [2515685 chr14 | 14 | 73052083  | 73053781  | 1699   | 2   | -0.433311 | 0.083636 | 73051714  | 73052452  | 73052927  | 7305463i  |
| 417 NA18563 | [2515685 chr14 | 14 | 73070288  | 73084642  | 14355  | 16  | -0.439568 | 0.042437 | 73068747  | 73071829  | 73083193  | 7308609;  |
| 418 NA18563 | [2515685 chr14 | 14 | 73106064  | 73110687  | 4624   | 3   | 0.684455  | 0.083132 | 73105752  | 73106376  | 73110054  | 7311132i  |
| 419 NA18563 | [2515685 chr14 | 14 | 77193994  | 77195545  | 1552   | 2   | 0.62939   | 0.099969 | 77193776  | 77194213  | 77194710  | 7719638i  |
| 420 NA18563 | [2515685 chr15 | 15 | 18543517  | 18565376  | 21860  | 25  | -0.254134 | 0.025127 | 18539578  | 18545819  | 18563074  | 1857240;  |
| 421 NA18563 | [2515685 chr15 | 15 | 19463903  | 19466745  | 2843   | 3   | 0.654085  | 0.083489 | 19462767  | 19465039  | 19466696  | 1946679-  |
| 422 NA18563 | [2515685 chr15 | 15 | 19761205  | 20094950  | 333746 | 342 | 0.261374  | 0.00774  | 19663241  | 19763507  | 20092648  | 2019778;  |
| 423 NA18563 | [2515685 chr15 | 15 | 21606753  | 21614600  | 7848   | 7   | 0.780453  | 0.062811 | 21606459  | 21607047  | 21612298  | 2163669!  |
| 424 NA18563 | [2515685 chr15 | 15 | 24986053  | 24992250  | 6198   | 7   | 0.813507  | 0.06126  | 24985426  | 24986680  | 24991680  | 2499282i  |
| 425 NA18563 | [2515685 chr15 | 15 | 32504316  | 32592621  | 88306  | 75  | 0.479131  | 0.017703 | 32503998  | 32504634  | 32592260  | 3259298;  |
| 426 NA18563 | [2515685 chr15 | 15 | 43106834  | 43111174  | 4341   | 5   | 0.452087  | 0.063366 | 43106498  | 43107171  | 43111071  | 4311127;  |
| 427 NA18563 | [2515685 chr15 | 15 | 47556589  | 47568968  | 12380  | 10  | 0.460815  | 0.046032 | 47521727  | 47558891  | 47566666  | 4759675;  |
| 428 NA18563 | [2515685 chr15 | 15 | 74671388  | 74678877  | 7490   | 2   | -1.574263 | 0.140221 | 74671122  | 74671654  | 74678381  | 7467937;  |
| 429 NA18563 | [2515685 chr15 | 15 | 74678877  | 74682820  | 3944   | 7   | -3.774016 | 0.13393  | 74678381  | 74679373  | 74680518  | 7468951!  |
| 430 NA18563 | [2515685 chr15 | 15 | 75117585  | 75119946  | 2362   | 4   | -1.700283 | 0.104854 | 75117343  | 75117827  | 75119741  | 7512015;  |
| 431 NA18563 | [2515685 chr15 | 15 | 82333041  | 82335194  | 2154   | 2   | -0.645364 | 0.104785 | 82332284  | 82333799  | 82334729  | 8233566i  |
| 432 NA18563 | [2515685 chr15 | 15 | 100109640 | 100122682 | 13043  | 98  | 0.498789  | 0.011812 | 100108905 | 100110376 | 100122315 | 10012305! |
| 433 NA18563 | [2515685 chr16 | 16 | 4950390   | 4953612   | 3223   | 2   | -0.572149 | 0.109017 | 4949933   | 4950847   | 4952948   | 495427i   |
| 434 NA18563 | [2515685 chr16 | 16 | 12550392  | 12553526  | 3135   | 3   | -0.435195 | 0.082408 | 12549915  | 12550869  | 12552957  | 1255409!  |
| 435 NA18563 | [2515685 chr16 | 16 | 21321436  | 21323686  | 2251   | 13  | 0.366322  | 0.032328 | 21321333  | 21321540  | 21323533  | 2132383!  |
| 436 NA18563 | [2515685 chr16 | 16 | 21469971  | 21495392  | 25422  | 27  | 0.294185  | 0.027231 | 21469490  | 21470452  | 21493511  | 2150110!  |
| 437 NA18563 | [2515685 chr16 | 16 | 21753870  | 21756137  | 2268   | 15  | 0.371401  | 0.029645 | 21753767  | 21753974  | 21755984  | 2175629i  |
| 438 NA18563 | [2515685 chr16 | 16 | 22452875  | 22454874  | 2000   | 13  | 0.37082   | 0.031899 | 22452722  | 22453028  | 22454771  | 2245497!  |
| 439 NA18563 | [2515685 chr16 | 16 | 22499397  | 22618743  | 119347 | 106 | 0.282019  | 0.013662 | 22499008  | 22499786  | 22617181  | 2262030i  |
| 440 NA18563 | [2515685 chr16 | 16 | 28324617  | 28335549  | 10933  | 10  | 0.279596  | 0.04615  | 28324569  | 28324665  | 28334190  | 2833690!  |
| 441 NA18563 | [2515685 chr16 | 16 | 28617225  | 28628077  | 10853  | 11  | 0.276586  | 0.044451 | 28615757  | 28618694  | 28627777  | 2862837;  |
| 442 NA18563 | [2515685 chr16 | 16 | 29300574  | 29302684  | 2111   | 11  | 0.366015  | 0.034994 | 29300408  | 29300741  | 29302391  | 2930297;  |
| 443 NA18563 | [2515685 chr16 | 16 | 29402841  | 29404254  | 1414   | 9   | 0.367615  | 0.038206 | 29402738  | 29402945  | 29404073  | 2940443i  |
| 444 NA18563 | [2515685 chr16 | 16 | 30142181  | 30144224  | 2044   | 14  | 0.370315  | 0.030528 | 30142078  | 30142285  | 30144043  | 3014440i  |
| 445 NA18563 | [2515685 chr16 | 16 | 32159898  | 32160377  | 480    | 2   | -1.512428 | 0.097512 | 32159453  | 32160343  | 32160346  | 3216040!  |
| 446 NA18563 | [2515685 chr16 | 16 | 32606692  | 32607163  | 472    | 2   | -1.512484 | 0.097514 | 32606661  | 32606724  | 32606727  | 3260759!  |
| 447 NA18563 | [2515685 chr16 | 16 | 33100875  | 33101346  | 472    | 2   | -1.512428 | 0.097512 | 33100438  | 33101312  | 33101315  | 3310137;  |
| 448 NA18563 | [2515685 chr16 | 16 | 33157406  | 33157879  | 474    | 2   | -1.512428 | 0.097512 | 33156967  | 33157845  | 33157848  | 3315791i  |
| 449 NA18563 | [2515685 chr16 | 16 | 34315495  | 34606125  | 290631 | 324 | -0.453764 | 0.008219 | 34314428  | 34316562  | 34605058  | 3460719;  |
| 450 NA18563 | [2515685 chr16 | 16 | 54353377  | 54362962  | 9586   | 11  | -0.408437 | 0.047107 | 54353335  | 54353419  | 54362223  | 5436370;  |
| 451 NA18563 | [2515685 chr16 | 16 | 54365075  | 54369383  | 4309   | 6   | -0.767074 | 0.056194 | 54364721  | 54365430  | 54368899  | 5436986i  |
| 452 NA18563 | [2515685 chr16 | 16 | 54374082  | 54380125  | 6044   | 5   | -0.368052 | 0.0645   | 54373313  | 54374852  | 54379862  | 5438038i  |
| 453 NA18563 | [2515685 chr16 | 16 | 54401577  | 54403491  | 1915   | 2   | 0.633266  | 0.111799 | 54401078  | 54402076  | 54402534  | 5440444i  |
| 454 NA18563 | [2515685 chr16 | 16 | 57204541  | 57207585  | 3045   | 3   | 4.497713  | 0.188014 | 57204170  | 57204913  | 57206938  | 5720823;  |
| 455 NA18563 | [2515685 chr16 | 16 | 76930776  | 76942282  | 11507  | 9   | 0.539875  | 0.047668 | 76930290  | 76931263  | 76941602  | 7694296;  |
| 456 NA18563 | [2515685 chr16 | 16 | 83994929  | 84005017  | 10089  | 82  | -0.320961 | 0.014177 | 83994558  | 83995300  | 84004576  | 8400545!  |
| 457 NA18563 | [2515685 chr16 | 16 | 84562720  | 84565235  | 2516   | 11  | 0.772278  | 0.04755  | 84561685  | 84563756  | 84565142  | 8456532!  |
| 458 NA18563 | [2515685 chr16 | 16 | 86669849  | 86672366  | 2518   | 2   | -0.600424 | 0.091612 | 86669288  | 86670411  | 86671217  | 8667351!  |
| 459 NA18563 | [2515685 chr16 | 16 | 88710329  | 88712266  | 1938   | 10  | -0.446243 | 0.05129  | 88710203  | 88710456  | 88712200  | 8871233;  |
| 460 NA18563 | [2515685 chr16 | 16 | 88807706  | 88815307  | 7602   | 4   | 0.420666  | 0.07013  | 88794450  | 88809587  | 88813426  | 8881918!  |
| 461 NA18563 | [2515685 chr17 | 17 | 911980    | 915554    | 3575   | 4   | -0.644998 | 0.076171 | 911452    | 912508    | 915413    | 91569i    |
| 462 NA18563 | [2515685 chr17 | 17 | 966845    | 969578    | 2734   | 21  | 0.642953  | 0.034861 | 966537    | 967154    | 969378    | 969775!   |
| 463 NA18563 | [2515685 chr17 | 17 | 13561692  | 13563867  | 2176   | 2   | -0.622763 | 0.114047 | 13560483  | 13562902  | 13563387  | 1356434!  |
| 464 NA18563 | [2515685 chr17 | 17 | 16657271  | 16665630  | 8360   | 13  | -0.255056 | 0.041979 | 16657056  | 16657486  | 16665353  | 1666590!  |
| 465 NA18563 | [2515685 chr17 | 17 | 18331739  | 18332345  | 607    | 2   | -0.712889 | 0.098653 | 18331509  | 18331970  | 18331978  | 1833271;  |
| 466 NA18563 | [2515685 chr17 | 17 | 18894634  | 19081415  | 186782 | 329 | 0.297967  | 0.007217 | 18894532  | 18894736  | 19081054  | 1908177i  |
| 467 NA18563 | [2515685 chr17 | 17 | 20299935  | 20300531  | 597    | 2   | -0.712889 | 0.098653 | 20299568  | 20300303  | 20300311  | 2030075;  |
| 468 NA18563 | [2515685 chr17 | 17 | 21942186  | 21955530  | 13345  | 22  | -0.371235 | 0.03042  | 21941754  | 21942618  | 21955191  | 2195586!  |
| 469 NA18563 | [2515685 chr17 | 17 | 25980390  | 25988231  | 7842   | 3   | 0.382747  | 0.073015 | 25977528  | 25982589  | 25986032  | 2599248i  |

|             |                |    |          |          |        |     |           |          |          |          |          |          |
|-------------|----------------|----|----------|----------|--------|-----|-----------|----------|----------|----------|----------|----------|
| 470 NA18563 | [2515685 chr17 | 17 | 31430406 | 31469200 | 38795  | 55  | 0.354712  | 0.00512  | 31429658 | 31431155 | 31468924 | 31469477 |
| 471 NA18563 | [2515685 chr17 | 17 | 31505929 | 31889223 | 383295 | 554 | 0.354712  | 0.00512  | 31505824 | 31506035 | 31888786 | 3188966  |
| 472 NA18563 | [2515685 chr17 | 17 | 32829500 | 32833231 | 3732   | 5   | 0.692766  | 0.073895 | 32828825 | 32830175 | 32832670 | 3283379  |
| 473 NA18563 | [2515685 chr17 | 17 | 33324385 | 33356043 | 31659  | 36  | 0.332524  | 0.021559 | 33323841 | 33324930 | 33355781 | 3335630  |
| 474 NA18563 | [2515685 chr17 | 17 | 33423761 | 33430790 | 7030   | 11  | -0.423761 | 0.041568 | 33422990 | 33424532 | 33428591 | 3352929  |
| 475 NA18563 | [2515685 chr17 | 17 | 33555392 | 33586158 | 30767  | 31  | 0.340105  | 0.022272 | 33555169 | 33555615 | 33586040 | 3358627  |
| 476 NA18563 | [2515685 chr17 | 17 | 33654387 | 33659558 | 5172   | 12  | -0.445281 | 0.041367 | 33653601 | 33655173 | 33658997 | 3366011  |
| 477 NA18563 | [2515685 chr17 | 17 | 40945023 | 40954310 | 9288   | 12  | 0.487531  | 0.036568 | 40944314 | 40945733 | 40953936 | 4095468  |
| 478 NA18563 | [2515685 chr17 | 17 | 41006614 | 41017119 | 10506  | 13  | -0.344034 | 0.041157 | 41006215 | 41007013 | 41016872 | 4101736  |
| 479 NA18563 | [2515685 chr17 | 17 | 41741357 | 42137409 | 396053 | 441 | 0.431968  | 0.005985 | 41740846 | 41741868 | 42135210 | 4214194  |
| 480 NA18563 | [2515685 chr17 | 17 | 42447536 | 42487040 | 39505  | 67  | 0.257055  | 0.016557 | 42447059 | 42448014 | 42486638 | 4248744  |
| 481 NA18563 | [2515685 chr17 | 17 | 42970703 | 42975972 | 5270   | 11  | -0.410678 | 0.043444 | 42970185 | 42971221 | 42975162 | 4297678  |
| 482 NA18563 | [2515685 chr17 | 17 | 54718891 | 54720406 | 1516   | 2   | -0.946345 | 0.124582 | 54718493 | 54719289 | 54719841 | 5472097  |
| 483 NA18563 | [2515685 chr17 | 17 | 60282906 | 60309866 | 26961  | 36  | 0.328176  | 0.022974 | 60282477 | 60283336 | 60309366 | 6031036  |
| 484 NA18563 | [2515685 chr17 | 17 | 75703594 | 75706115 | 2522   | 2   | 0.734856  | 0.117938 | 75702449 | 75704739 | 75705816 | 7570641  |
| 485 NA18563 | [2515685 chr18 | 18 | 9805250  | 9806206  | 957    | 2   | -2.303393 | 0.149946 | 9804637  | 9805863  | 9806038  | 980637   |
| 486 NA18563 | [2515685 chr18 | 18 | 14582609 | 14599044 | 16436  | 17  | -0.339705 | 0.035948 | 14580818 | 14584401 | 14598736 | 1459935  |
| 487 NA18563 | [2515685 chr18 | 18 | 14858998 | 14885659 | 26662  | 38  | 0.346085  | 0.022409 | 14858404 | 14859593 | 14884378 | 1488694  |
| 488 NA18563 | [2515685 chr18 | 18 | 15359177 | 15375873 | 16697  | 16  | 0.336078  | 0.036127 | 15356606 | 15361749 | 15371295 | 1679891  |
| 489 NA18563 | [2515685 chr18 | 18 | 28142218 | 28143399 | 1182   | 2   | 0.725757  | 0.11955  | 28141854 | 28142583 | 28143055 | 2814374  |
| 490 NA18563 | [2515685 chr18 | 18 | 36514289 | 36521090 | 6802   | 6   | -0.83978  | 0.063091 | 36513759 | 36514820 | 36520512 | 3652166  |
| 491 NA18563 | [2515685 chr18 | 18 | 46430359 | 46515928 | 85570  | 2   | -0.526827 | 0.082536 | 46312475 | 46314937 | 46511350 | 4670283  |
| 492 NA18563 | [2515685 chr18 | 18 | 61917747 | 61920171 | 2425   | 4   | 2.53833   | 0.126176 | 61917522 | 61917973 | 61919646 | 6192069  |
| 493 NA18563 | [2515685 chr18 | 18 | 64896052 | 64906913 | 10862  | 12  | -0.796603 | 0.045718 | 64894789 | 64897315 | 64906598 | 6490722  |
| 494 NA18563 | [2515685 chr18 | 18 | 74229522 | 74234275 | 4754   | 32  | -0.42368  | 0.020539 | 74229210 | 74229835 | 74234139 | 7423441  |
| 495 NA18563 | [2515685 chr18 | 18 | 74373005 | 74376367 | 3363   | 7   | 0.482863  | 0.044522 | 74372064 | 74373947 | 74375833 | 7437690  |
| 496 NA18563 | [2515685 chr18 | 18 | 74392800 | 74397377 | 4578   | 3   | 0.870461  | 0.096866 | 74390826 | 74394774 | 74396965 | 7439779  |
| 497 NA18563 | [2515685 chr19 | 19 | 310414   | 312953   | 2540   | 14  | -0.35408  | 0.037614 | 309687   | 311142   | 312913   | 31299    |
| 498 NA18563 | [2515685 chr19 | 19 | 1200296  | 1203116  | 2821   | 4   | 0.376438  | 0.074947 | 1199725  | 1200868  | 1202847  | 120338   |
| 499 NA18563 | [2515685 chr19 | 19 | 8707491  | 8760468  | 52978  | 90  | 0.304163  | 0.012583 | 8706686  | 8708296  | 8760209  | 876072   |
| 500 NA18563 | [2515685 chr19 | 19 | 23007905 | 23013841 | 5937   | 6   | 0.835014  | 0.067576 | 22990964 | 23010431 | 23013525 | 2301415  |
| 501 NA18563 | [2515685 chr19 | 19 | 23108259 | 23109446 | 1188   | 2   | 0.779727  | 0.1061   | 23107903 | 23108615 | 23108879 | 2311001  |
| 502 NA18563 | [2515685 chr19 | 19 | 24146401 | 24146489 | 89     | 2   | -0.892025 | 0.102309 | 24146390 | 24146412 | 24146475 | 2414650  |
| 503 NA18563 | [2515685 chr19 | 19 | 39419837 | 39421349 | 1513   | 3   | 0.475838  | 0.094704 | 39419616 | 39420059 | 39421018 | 3942168  |
| 504 NA18563 | [2515685 chr19 | 19 | 40413384 | 40416276 | 2893   | 3   | -0.62067  | 0.075661 | 40412021 | 40414747 | 40415819 | 4041673  |
| 505 NA18563 | [2515685 chr19 | 19 | 40540866 | 40541878 | 1013   | 3   | -0.428916 | 0.080964 | 40540646 | 40541086 | 40541551 | 4054220  |
| 506 NA18563 | [2515685 chr19 | 19 | 40543556 | 40554347 | 10792  | 9   | -0.503287 | 0.050128 | 40543292 | 40543821 | 40554020 | 4055467  |
| 507 NA18563 | [2515685 chr19 | 19 | 41450188 | 41493611 | 43424  | 28  | 0.425215  | 0.025079 | 41421528 | 41452714 | 41491085 | 4149785  |
| 508 NA18563 | [2515685 chr19 | 19 | 42450474 | 42487512 | 37039  | 33  | 0.40786   | 0.022288 | 42413600 | 42453000 | 42486487 | 4248853  |
| 509 NA18563 | [2515685 chr19 | 19 | 53100142 | 53151974 | 51833  | 98  | -0.327987 | 0.011974 | 53098980 | 53101305 | 53151638 | 5315231  |
| 510 NA18563 | [2515685 chr19 | 19 | 55285877 | 55336157 | 50281  | 104 | -0.318825 | 0.011544 | 55285730 | 55286025 | 55335244 | 5533707  |
| 511 NA18563 | [2515685 chr19 | 19 | 56788987 | 56795867 | 6881   | 7   | 0.293466  | 0.055621 | 56788678 | 56789297 | 56795672 | 5679606  |
| 512 NA18563 | [2515685 chr19 | 19 | 56824422 | 56827216 | 2795   | 5   | -0.61796  | 0.065755 | 56824136 | 56824709 | 56826331 | 5682810  |
| 513 NA18563 | [2515685 chr19 | 19 | 56827216 | 56836311 | 9096   | 7   | -3.194159 | 0.098698 | 56826331 | 56828101 | 56834905 | 5683771  |
| 514 NA18563 | [2515685 chr19 | 19 | 56836311 | 56839030 | 2720   | 3   | -0.46533  | 0.076332 | 56834905 | 56837718 | 56838811 | 5683924  |
| 515 NA18563 | [2515685 chr19 | 19 | 56839030 | 56840752 | 1723   | 3   | -1.636662 | 0.11202  | 56838811 | 56839249 | 56840372 | 5684113  |
| 516 NA18563 | [2515685 chr19 | 19 | 56840752 | 56841964 | 1213   | 3   | -0.515547 | 0.077892 | 56840372 | 56841133 | 56841608 | 5684232  |
| 517 NA18563 | [2515685 chr19 | 19 | 58210435 | 58244458 | 34024  | 26  | -0.729979 | 0.030097 | 58209863 | 58211007 | 58243893 | 5824502  |
| 518 NA18563 | [2515685 chr19 | 19 | 59247755 | 59252061 | 4307   | 5   | 0.780056  | 0.070112 | 59246427 | 59249084 | 59251854 | 5925226  |
| 519 NA18563 | [2515685 chr19 | 19 | 60958920 | 60976029 | 17110  | 15  | -0.777071 | 0.039377 | 60957933 | 60959907 | 60975748 | 6097631  |
| 520 NA18563 | [2515685 chr20 | 20 | 1511097  | 1532477  | 21381  | 26  | 0.723173  | 0.030962 | 1510534  | 1511660  | 1532182  | 153277   |
| 521 NA18563 | [2515685 chr20 | 20 | 9116767  | 9118858  | 2092   | 3   | -0.616608 | 0.096143 | 9116195  | 9117339  | 9118086  | 911963   |
| 522 NA18563 | [2515685 chr20 | 20 | 15249645 | 15251805 | 2161   | 2   | -0.842073 | 0.105815 | 15249381 | 15249909 | 15251287 | 1525232  |
| 523 NA18563 | [2515685 chr20 | 20 | 25714111 | 25734783 | 20673  | 28  | -0.329976 | 0.027087 | 25713986 | 25714237 | 25734531 | 2573503  |
| 524 NA18563 | [2515685 chr20 | 20 | 25768296 | 25774048 | 5753   | 8   | -0.359987 | 0.052602 | 25768259 | 25768333 | 25773787 | 2577431  |

|             |                |    |           |           |        |     |           |          |           |           |           |           |
|-------------|----------------|----|-----------|-----------|--------|-----|-----------|----------|-----------|-----------|-----------|-----------|
| 525 NA18563 | [2515685 chr20 | 20 | 25978392  | 25999063  | 20672  | 28  | -0.329977 | 0.027087 | 25978140  | 25978644  | 25998938  | 2599918:  |
| 526 NA18563 | [2515685 chr20 | 20 | 28142178  | 28145341  | 3164   | 5   | 0.409778  | 0.069452 | 28141812  | 28142544  | 28145025  | 2814565:  |
| 527 NA18563 | [2515685 chr20 | 20 | 36441418  | 36448533  | 7116   | 5   | -0.862534 | 0.073773 | 36439555  | 36443282  | 36446786  | 3645028:  |
| 528 NA18563 | [2515685 chr20 | 20 | 59951513  | 59957050  | 5538   | 18  | 0.308413  | 0.031162 | 59950681  | 59952345  | 59956538  | 5995756:  |
| 529 NA18563 | [2515685 chr20 | 20 | 59979365  | 59980324  | 960    | 3   | 0.528772  | 0.096797 | 59979109  | 59979622  | 59979994  | 5998065:  |
| 530 NA18563 | [2515685 chr20 | 20 | 62066380  | 62068214  | 1835   | 8   | 1.690421  | 0.061379 | 62066146  | 62066615  | 62067671  | 6206875:  |
| 531 NA18563 | [2515685 chr20 | 20 | 62233505  | 62235897  | 2393   | 4   | -0.346122 | 0.056765 | 62232847  | 62234163  | 62235101  | 6223669:  |
| 532 NA18563 | [2515685 chr21 | 21 | 9879630   | 9969325   | 89696  | 11  | 0.255332  | 0.043331 | 9874204   | 9885055   | 9963900   | 997532:   |
| 533 NA18563 | [2515685 chr21 | 21 | 10175806  | 10200085  | 24280  | 18  | -0.4003   | 0.034023 | 10175546  | 10176067  | 10198728  | 1020144:  |
| 534 NA18563 | [2515685 chr21 | 21 | 13637687  | 13664741  | 27055  | 42  | 0.324233  | 0.021595 | 13636612  | 13638763  | 13663958  | 1366552:  |
| 535 NA18563 | [2515685 chr21 | 21 | 13843830  | 13856946  | 13117  | 9   | -0.264628 | 0.051799 | 13843534  | 13844127  | 13856729  | 1385716:  |
| 536 NA18563 | [2515685 chr21 | 21 | 22576580  | 22586733  | 10154  | 10  | -3.477969 | 0.100235 | 22576051  | 22577109  | 22586474  | 2258699:  |
| 537 NA18563 | [2515685 chr21 | 21 | 46881149  | 46882858  | 1710   | 4   | 0.361529  | 0.067425 | 46880965  | 46881333  | 46882659  | 4688305:  |
| 538 NA18563 | [2515685 chr22 | 22 | 14441689  | 14469426  | 27738  | 39  | 0.2531    | 0.022296 | 14441234  | 14442144  | 14469260  | 1446959:  |
| 539 NA18563 | [2515685 chr22 | 22 | 14768390  | 14769425  | 1036   | 2   | 0.425626  | 0.08249  | 14768382  | 14768398  | 14768944  | 1476990:  |
| 540 NA18563 | [2515685 chr22 | 22 | 17032140  | 17129692  | 97553  | 147 | -0.325438 | 0.011342 | 17031480  | 17032801  | 17129458  | 1712992:  |
| 541 NA18563 | [2515685 chr22 | 22 | 17225881  | 17226485  | 605    | 2   | -0.703838 | 0.087796 | 17225668  | 17226094  | 17226302  | 1722666:  |
| 542 NA18563 | [2515685 chr22 | 22 | 17385504  | 17397941  | 12438  | 22  | -0.354025 | 0.031627 | 17385031  | 17385977  | 17397517  | 1739836:  |
| 543 NA18563 | [2515685 chr22 | 22 | 18689533  | 19032736  | 343204 | 347 | -0.295491 | 0.004203 | 18686307  | 18692211  | 19032008  | 1903346:  |
| 544 NA18563 | [2515685 chr22 | 22 | 19377399  | 19952782  | 575384 | 319 | -0.295491 | 0.004203 | 19377046  | 19377752  | 19952473  | 1995309:  |
| 545 NA18563 | [2515685 chr22 | 22 | 19970040  | 20121795  | 151756 | 228 | -0.295491 | 0.004203 | 19969841  | 19970239  | 20121548  | 2012204:  |
| 546 NA18563 | [2515685 chr22 | 22 | 20137248  | 20243639  | 106392 | 148 | -0.295491 | 0.004203 | 20136561  | 20137935  | 20240961  | 2030228:  |
| 547 NA18563 | [2515685 chr22 | 22 | 22672624  | 22674936  | 2313   | 4   | 1.189068  | 0.086264 | 22672391  | 22672858  | 22674426  | 2267544:  |
| 548 NA18563 | [2515685 chr22 | 22 | 22683874  | 22688523  | 4650   | 3   | -0.706122 | 0.096051 | 22678349  | 22686552  | 22687378  | 2268966:  |
| 549 NA18563 | [2515685 chr22 | 22 | 22690382  | 22691501  | 1120   | 2   | 0.692797  | 0.029706 | 22690146  | 22690619  | 22691088  | 2269191:  |
| 550 NA18563 | [2515685 chr22 | 22 | 22695407  | 22720154  | 24748  | 26  | 0.692797  | 0.029706 | 22695112  | 22695703  | 22719882  | 2272042:  |
| 551 NA18563 | [2515685 chr22 | 22 | 23914104  | 23915578  | 1475   | 2   | -0.654158 | 0.118558 | 23913704  | 23914504  | 23915200  | 2391595:  |
| 552 NA18563 | [2515685 chr22 | 22 | 33619409  | 33622591  | 3183   | 4   | 0.887609  | 0.075178 | 33618939  | 33619879  | 33622541  | 3362264:  |
| 553 NA18563 | [2515685 chr22 | 22 | 41258976  | 41274269  | 15294  | 5   | 0.442688  | 0.060931 | 41257980  | 41259972  | 41274060  | 4127447:  |
| 554 NA18563 | [2515685 chr22 | 22 | 43418479  | 43419675  | 1197   | 2   | 0.53181   | 0.095326 | 43418051  | 43418907  | 43419378  | 4341997:  |
| 555 NA18563 | [2515685 chr22 | 22 | 43790665  | 43878995  | 88331  | 3   | -0.480556 | 0.088791 | 43700090  | 43793343  | 43876436  | 4388155:  |
| 556 NA18563 | [2515685 chrX  | 23 | 1954542   | 1958817   | 4276   | 5   | -0.561986 | 0.063452 | 1954338   | 1954747   | 1958235   | 195940:   |
| 557 NA18563 | [2515685 chrX  | 23 | 9182407   | 9192056   | 9650   | 13  | 0.92646   | 0.041696 | 9181838   | 9182977   | 9191527   | 919258:   |
| 558 NA18563 | [2515685 chrX  | 23 | 38340304  | 38343955  | 3652   | 2   | -2.648176 | 0.145419 | 38339963  | 38340645  | 38341288  | 3834662:  |
| 559 NA18563 | [2515685 chrX  | 23 | 47623109  | 47627675  | 4567   | 8   | 0.286462  | 0.040858 | 47622759  | 47623460  | 47627303  | 4762804:  |
| 560 NA18563 | [2515685 chrX  | 23 | 47630554  | 47643399  | 12846  | 10  | 0.594442  | 0.014947 | 47629383  | 47631726  | 47643160  | 4764363:  |
| 561 NA18563 | [2515685 chrX  | 23 | 47647743  | 47725248  | 77506  | 81  | 0.594442  | 0.014947 | 47647230  | 47648257  | 47725104  | 4772539:  |
| 562 NA18563 | [2515685 chrX  | 23 | 47732264  | 47734122  | 1859   | 2   | 0.679387  | 0.090843 | 47732110  | 47732419  | 47733136  | 4773510:  |
| 563 NA18563 | [2515685 chrX  | 23 | 47748818  | 47759703  | 10886  | 8   | 0.573754  | 0.050049 | 47748639  | 47748998  | 47758531  | 4776087:  |
| 564 NA18563 | [2515685 chrX  | 23 | 56677475  | 56690665  | 13191  | 31  | 0.575694  | 0.020897 | 56677130  | 56677820  | 56690311  | 5669101:  |
| 565 NA18563 | [2515685 chrX  | 23 | 56698287  | 56703209  | 4923   | 11  | 0.345559  | 0.04592  | 56697990  | 56698584  | 56702945  | 5670347:  |
| 566 NA18563 | [2515685 chrX  | 23 | 105355082 | 105360133 | 5052   | 17  | 0.405014  | 0.074468 | 105352123 | 105358042 | 105359168 | 10536109: |
| 567 NA18563 | [2515685 chrX  | 23 | 114783411 | 114796920 | 13510  | 35  | -0.575321 | 0.014367 | 114783196 | 114783627 | 114796162 | 11479767: |
| 568 NA18563 | [2515685 chrX  | 23 | 114804126 | 114821023 | 16898  | 36  | -0.575321 | 0.014367 | 114803617 | 114804636 | 114817056 | 11483607: |
| 569 NA18563 | [2515685 chrX  | 23 | 115741949 | 115742309 | 361    | 2   | -0.612828 | 0.101547 | 115741862 | 115742036 | 115742232 | 11574238: |
| 570 NA18563 | [2515685 chrX  | 23 | 134588964 | 134591644 | 2681   | 10  | 0.404211  | 0.039031 | 134588484 | 134589444 | 134591595 | 13459169: |
| 571 NA18563 | [2515685 chrX  | 23 | 134598917 | 134608921 | 10005  | 17  | 0.382253  | 0.030218 | 134598406 | 134599428 | 134608876 | 13460896: |
| 572 NA18563 | [2515685 chrX  | 23 | 134662343 | 134672332 | 9990   | 17  | 0.381759  | 0.030125 | 134662294 | 134662392 | 134671821 | 13467284: |
| 573 NA18563 | [2515685 chrX  | 23 | 134750696 | 134755274 | 4579   | 10  | 0.269617  | 0.041385 | 134750516 | 134750876 | 134755112 | 13475543: |
| 574 NA18563 | [2515685 chrX  | 23 | 140244231 | 140245198 | 968    | 2   | -1.194541 | 0.143087 | 140243934 | 140244529 | 140244899 | 14024549: |
| 575 NA18563 | [2515685 chrX  | 23 | 141193987 | 141198751 | 4765   | 9   | -1.430056 | 0.070615 | 141192204 | 141195770 | 141198717 | 14119878: |
| 576 NA18563 | [2515685 chrY  | 24 | 1954542   | 1958817   | 4276   | 5   | -0.561986 | 0.063452 | 1954338   | 1954747   | 1958235   | 195940:   |
| 577 NA18563 | [2515685 chrY  | 24 | 9188387   | 9206566   | 18180  | 57  | 0.298558  | 0.01892  | 9188295   | 9188480   | 9206485   | 920664:   |
| 578 NA18563 | [2515685 chrY  | 24 | 21993928  | 22050080  | 56153  | 188 | 0.291066  | 0.008608 | 21993716  | 21994140  | 22049835  | 2205032:  |
| 579 NA18563 | [2515685 chrY  | 24 | 22363602  | 22400461  | 36860  | 125 | 0.298878  | 0.010444 | 22363357  | 22363847  | 22400431  | 2240049:  |

|             |               |    |           |           |         |     |           |          |           |           |           |          |
|-------------|---------------|----|-----------|-----------|---------|-----|-----------|----------|-----------|-----------|-----------|----------|
| 580 NA18563 | [2515685 chrY | 24 | 22650628  | 22665376  | 14749   | 52  | 0.307571  | 0.016657 | 22649721  | 22651535  | 22665346  | 22665407 |
| 581 NA18563 | [2515685 chrY | 24 | 22889581  | 22904311  | 14731   | 51  | 0.311452  | 0.01685  | 22889551  | 22889612  | 22903429  | 22905197 |
| 582 NA18563 | [2515685 chrY | 24 | 23330065  | 23337632  | 7568    | 9   | -0.285737 | 0.05001  | 23329053  | 23331078  | 23337545  | 23337711 |
| 583 NA18563 | [2515685 chrY | 24 | 23338337  | 23512512  | 174176  | 116 | -0.398489 | 0.003314 | 23338226  | 23338449  | 23512461  | 23512567 |
| 584 NA18563 | [2515685 chrY | 24 | 23514501  | 23979978  | 465478  | 362 | -0.398489 | 0.003314 | 23514366  | 23514636  | 23979753  | 23980207 |
| 585 NA18563 | [2515685 chrY | 24 | 24050460  | 24117396  | 66937   | 93  | -0.398489 | 0.003314 | 24050390  | 24050530  | 24117291  | 24117507 |
| 586 NA18563 | [2515685 chrY | 24 | 24118962  | 26103543  | 1984582 | 976 | -0.398489 | 0.003314 | 24118859  | 24119066  | 26103475  | 26103617 |
| 587 NA18563 | [2515685 chrY | 24 | 26358499  | 26455562  | 97064   | 85  | -0.398489 | 0.003314 | 26358005  | 26358993  | 26452623  | 26458797 |
| 588 NA18563 | [2515685 chrY | 24 | 26477193  | 26484112  | 6920    | 10  | -0.277329 | 0.039323 | 26476712  | 26477675  | 26483558  | 26484661 |
| 1 NA19144   | [2515685 chr1 | 1  | 29401     | 96058     | 66658   | 59  | 0.540138  | 0.019188 | 27752     | 31050     | 95859     | 96257    |
| 2 NA19144   | [2515685 chr1 | 1  | 600809    | 612159    | 11351   | 8   | -1.250383 | 0.05759  | 587801    | 604315    | 610122    | 614196   |
| 3 NA19144   | [2515685 chr1 | 1  | 1652384   | 1716393   | 64010   | 81  | -0.307882 | 0.015566 | 1652349   | 1652420   | 1715548   | 1717238  |
| 4 NA19144   | [2515685 chr1 | 1  | 1853012   | 1854645   | 1634    | 2   | 0.682218  | 0.103013 | 1852616   | 1853409   | 1853816   | 1855477  |
| 5 NA19144   | [2515685 chr1 | 1  | 12833670  | 12851108  | 17439   | 23  | 0.319635  | 0.029312 | 12833445  | 12833896  | 12850914  | 12851307 |
| 6 NA19144   | [2515685 chr1 | 1  | 12875394  | 12886858  | 11465   | 25  | 0.253994  | 0.025232 | 12875139  | 12875650  | 12886536  | 12887181 |
| 7 NA19144   | [2515685 chr1 | 1  | 12926478  | 12926956  | 479     | 2   | -1.189132 | 0.121741 | 12926178  | 12926778  | 12926804  | 12927101 |
| 8 NA19144   | [2515685 chr1 | 1  | 13124784  | 13125537  | 754     | 2   | 0.656621  | 0.100102 | 13124609  | 13124960  | 13124977  | 13126097 |
| 9 NA19144   | [2515685 chr1 | 1  | 13159940  | 13167109  | 7170    | 13  | 0.312769  | 0.031393 | 13159618  | 13160263  | 13166599  | 13167617 |
| 10 NA19144  | [2515685 chr1 | 1  | 13380737  | 13387906  | 7170    | 13  | 0.312769  | 0.031393 | 13380415  | 13381060  | 13387396  | 13388411 |
| 11 NA19144  | [2515685 chr1 | 1  | 16522975  | 16524502  | 1528    | 2   | -0.585406 | 0.106483 | 16522323  | 16523627  | 16524165  | 16524837 |
| 12 NA19144  | [2515685 chr1 | 1  | 16558531  | 16562474  | 3944    | 2   | -1.222387 | 0.123957 | 16556735  | 16560328  | 16561567  | 16563387 |
| 13 NA19144  | [2515685 chr1 | 1  | 16617189  | 16618876  | 1688    | 2   | 0.544271  | 0.096713 | 16616538  | 16617841  | 16618405  | 16619347 |
| 14 NA19144  | [2515685 chr1 | 1  | 25330950  | 25409968  | 79019   | 66  | 0.251095  | 0.017558 | 25330662  | 25331238  | 25409763  | 25410177 |
| 15 NA19144  | [2515685 chr1 | 1  | 25435175  | 25439981  | 4807    | 10  | 0.314903  | 0.046944 | 25435166  | 25435184  | 25438920  | 25441047 |
| 16 NA19144  | [2515685 chr1 | 1  | 72467674  | 72476358  | 8685    | 5   | -0.803111 | 0.074574 | 72467220  | 72468129  | 72475692  | 72477027 |
| 17 NA19144  | [2515685 chr1 | 1  | 72478372  | 72524180  | 45809   | 36  | 0.813373  | 0.026546 | 72478140  | 72478604  | 72523661  | 72524707 |
| 18 NA19144  | [2515685 chr1 | 1  | 73392209  | 73424207  | 31999   | 35  | 0.509357  | 0.025831 | 73392056  | 73392362  | 73424044  | 73424377 |
| 19 NA19144  | [2515685 chr1 | 1  | 89188689  | 89190762  | 2074    | 4   | 2.01976   | 0.12178  | 89188470  | 89188908  | 89190458  | 89191067 |
| 20 NA19144  | [2515685 chr1 | 1  | 103848059 | 104015739 | 167681  | 267 | -0.328557 | 0.007773 | 103842566 | 103851565 | 104013178 | 10401830 |
| 21 NA19144  | [2515685 chr1 | 1  | 108444641 | 108449550 | 4910    | 8   | 0.727419  | 0.05476  | 108443817 | 108445466 | 108449224 | 10844987 |
| 22 NA19144  | [2515685 chr1 | 1  | 108514938 | 108565175 | 50238   | 53  | 0.333478  | 0.020798 | 108514864 | 108515012 | 108565023 | 10856532 |
| 23 NA19144  | [2515685 chr1 | 1  | 108638318 | 108688767 | 50450   | 54  | 0.34192   | 0.020546 | 108638254 | 108638383 | 108688693 | 10868884 |
| 24 NA19144  | [2515685 chr1 | 1  | 109936541 | 109965726 | 29186   | 29  | 0.361813  | 0.027188 | 109935803 | 109937279 | 109960625 | 10996638 |
| 25 NA19144  | [2515685 chr1 | 1  | 112405902 | 112416691 | 10790   | 9   | 0.522835  | 0.052168 | 112405415 | 112406389 | 112416423 | 11241696 |
| 26 NA19144  | [2515685 chr1 | 1  | 141404096 | 141404735 | 640     | 5   | 0.404176  | 0.067047 | 141404052 | 141404140 | 141404485 | 14140498 |
| 27 NA19144  | [2515685 chr1 | 1  | 143503868 | 143508860 | 4993    | 13  | -0.250739 | 0.035882 | 143503481 | 143504255 | 143508499 | 14350922 |
| 28 NA19144  | [2515685 chr1 | 1  | 145819541 | 145821079 | 1539    | 2   | 0.745711  | 0.103992 | 145819262 | 145819821 | 145820633 | 14582152 |
| 29 NA19144  | [2515685 chr1 | 1  | 145887153 | 145967452 | 80300   | 74  | 0.331807  | 0.017324 | 145886831 | 145887476 | 145966729 | 14596817 |
| 30 NA19144  | [2515685 chr1 | 1  | 149379938 | 149399435 | 19498   | 21  | 0.771425  | 0.034795 | 149368105 | 149383444 | 149399080 | 14939979 |
| 31 NA19144  | [2515685 chr1 | 1  | 149573821 | 149583431 | 9611    | 5   | 0.821473  | 0.073662 | 149573460 | 149574182 | 149582912 | 14958395 |
| 32 NA19144  | [2515685 chr1 | 1  | 158294538 | 158377436 | 82899   | 94  | -0.297836 | 0.014905 | 158294226 | 158294850 | 158377203 | 15837767 |
| 33 NA19144  | [2515685 chr1 | 1  | 193443495 | 193552515 | 109021  | 93  | -0.777956 | 0.017698 | 193443280 | 193443710 | 193551981 | 19355305 |
| 34 NA19144  | [2515685 chr1 | 1  | 193615671 | 193650443 | 34773   | 30  | -0.341197 | 0.026807 | 193615441 | 193615901 | 193650245 | 19365064 |
| 35 NA19144  | [2515685 chr1 | 1  | 220570241 | 220571400 | 1160    | 2   | 0.614977  | 0.105579 | 220569940 | 220570543 | 220571101 | 22057170 |
| 36 NA19144  | [2515685 chr1 | 1  | 220690168 | 220956591 | 266424  | 3   | -0.466058 | 0.074809 | 220689758 | 220690579 | 220953085 | 22105926 |
| 37 NA19144  | [2515685 chr1 | 1  | 234809650 | 234812614 | 2965    | 4   | -0.90485  | 0.084155 | 234808960 | 234810341 | 234812329 | 23481290 |
| 38 NA19144  | [2515685 chr1 | 1  | 236719047 | 236720968 | 1922    | 3   | -2.848996 | 0.149383 | 236718751 | 236719344 | 236720749 | 23672118 |
| 39 NA19144  | [2515685 chr1 | 1  | 244872415 | 244874098 | 1684    | 5   | -0.451586 | 0.069688 | 244872245 | 244872585 | 244873799 | 24487439 |
| 40 NA19144  | [2515685 chr1 | 1  | 245063969 | 245068899 | 4931    | 5   | -0.341529 | 0.066662 | 245063824 | 245064115 | 245066998 | 24507080 |
| 41 NA19144  | [2515685 chr1 | 1  | 245068899 | 245121920 | 53022   | 50  | -0.793256 | 0.022222 | 245066998 | 245070801 | 245121605 | 24512223 |
| 42 NA19144  | [2515685 chr2 | 2  | 1426294   | 1431425   | 5132    | 6   | 0.387727  | 0.052239 | 1425894   | 1426695   | 1430704   | 1432147  |
| 43 NA19144  | [2515685 chr2 | 2  | 13466341  | 13511508  | 45168   | 44  | 0.306635  | 0.017524 | 13466145  | 13466538  | 13510995  | 13512027 |
| 44 NA19144  | [2515685 chr2 | 2  | 13531646  | 13548027  | 16382   | 15  | 0.306635  | 0.017524 | 13530427  | 13532866  | 13547735  | 13548317 |
| 45 NA19144  | [2515685 chr2 | 2  | 34606298  | 34644911  | 38614   | 38  | 0.779933  | 0.025216 | 34601818  | 34609397  | 34641812  | 34648397 |
| 46 NA19144  | [2515685 chr2 | 2  | 52661573  | 52696869  | 35297   | 26  | -0.820755 | 0.030788 | 52661218  | 52661928  | 52696416  | 52697327 |

|             |               |   |           |           |        |     |           |          |           |           |           |           |
|-------------|---------------|---|-----------|-----------|--------|-----|-----------|----------|-----------|-----------|-----------|-----------|
| 47 NA19144  | [2515685 chr2 | 2 | 56563478  | 56567381  | 3904   | 2   | 3.625232  | 0.199782 | 56556559  | 56566577  | 56567035  | 56567721  |
| 48 NA19144  | [2515685 chr2 | 2 | 61675589  | 61676777  | 1189   | 2   | 0.921421  | 0.135191 | 61675200  | 61675979  | 61676468  | 61677081  |
| 49 NA19144  | [2515685 chr2 | 2 | 71254096  | 71259851  | 5756   | 6   | -0.672114 | 0.061885 | 71253721  | 71254472  | 71259334  | 71260361  |
| 50 NA19144  | [2515685 chr2 | 2 | 73921778  | 73948487  | 26710  | 42  | -0.571515 | 0.016873 | 73921335  | 73922222  | 73948060  | 73948911  |
| 51 NA19144  | [2515685 chr2 | 2 | 91101662  | 91107015  | 5354   | 2   | 0.534782  | 0.087101 | 91101386  | 91101938  | 91106590  | 91107441  |
| 52 NA19144  | [2515685 chr2 | 2 | 91567727  | 91590942  | 23216  | 34  | 0.253775  | 0.024914 | 91567535  | 91567920  | 91590723  | 91591116  |
| 53 NA19144  | [2515685 chr2 | 2 | 97184386  | 97189881  | 5496   | 2   | -0.820386 | 0.102636 | 97182781  | 97185992  | 97186782  | 97197311  |
| 54 NA19144  | [2515685 chr2 | 2 | 97281294  | 97297647  | 16354  | 26  | -0.276517 | 0.027553 | 97281091  | 97281497  | 97297385  | 97297911  |
| 55 NA19144  | [2515685 chr2 | 2 | 97613796  | 97614932  | 1137   | 2   | 1.545447  | 0.133112 | 97613553  | 97614040  | 97614467  | 97615391  |
| 56 NA19144  | [2515685 chr2 | 2 | 106340108 | 106344566 | 4459   | 5   | -0.556569 | 0.069599 | 106339864 | 106340353 | 106344055 | 106345071 |
| 57 NA19144  | [2515685 chr2 | 2 | 111696774 | 111699147 | 2374   | 16  | -0.269461 | 0.035359 | 111696413 | 111697136 | 111698899 | 11169939  |
| 58 NA19144  | [2515685 chr2 | 2 | 115108324 | 115118866 | 10543  | 10  | -0.798996 | 0.050339 | 115107995 | 115108654 | 115118291 | 11511944  |
| 59 NA19144  | [2515685 chr2 | 2 | 117444702 | 117452740 | 8039   | 6   | -0.652871 | 0.058245 | 117444220 | 117445184 | 117452442 | 117453031 |
| 60 NA19144  | [2515685 chr2 | 2 | 126159437 | 126168349 | 8913   | 3   | -2.732238 | 0.131024 | 126158494 | 126160381 | 126168048 | 12616865  |
| 61 NA19144  | [2515685 chr2 | 2 | 129261115 | 129262544 | 1430   | 2   | -0.512268 | 0.097218 | 129260775 | 129261456 | 129262002 | 12926308  |
| 62 NA19144  | [2515685 chr2 | 2 | 130405124 | 130482797 | 77674  | 90  | -0.281246 | 0.015149 | 130405077 | 130405172 | 130482453 | 13048314  |
| 63 NA19144  | [2515685 chr2 | 2 | 130498267 | 130501727 | 3461   | 8   | -0.305171 | 0.05166  | 130497934 | 130498600 | 130501436 | 13050201  |
| 64 NA19144  | [2515685 chr2 | 2 | 130582931 | 130583993 | 1063   | 2   | -0.409659 | 0.076643 | 130582683 | 130583180 | 130583782 | 13058420  |
| 65 NA19144  | [2515685 chr2 | 2 | 130884276 | 130893342 | 9067   | 18  | -0.261255 | 0.033288 | 130883955 | 130884597 | 130892827 | 13089385  |
| 66 NA19144  | [2515685 chr2 | 2 | 131441008 | 131442581 | 1574   | 2   | -0.670759 | 0.096138 | 131440819 | 131441198 | 131442201 | 13144296  |
| 67 NA19144  | [2515685 chr2 | 2 | 131764935 | 131782932 | 17998  | 27  | -0.379984 | 0.02712  | 131749458 | 131768034 | 131782590 | 131783271 |
| 68 NA19144  | [2515685 chr2 | 2 | 131819937 | 131821383 | 1452   | 4   | -0.343039 | 0.060484 | 131819619 | 131820245 | 131821162 | 13182160  |
| 69 NA19144  | [2515685 chr2 | 2 | 131899666 | 131907608 | 7943   | 13  | -0.293169 | 0.038754 | 131899373 | 131899960 | 131907180 | 13190803  |
| 70 NA19144  | [2515685 chr2 | 2 | 131918222 | 131953962 | 35741  | 48  | -0.295746 | 0.021153 | 131918096 | 131918348 | 131953571 | 13195435  |
| 71 NA19144  | [2515685 chr2 | 2 | 132142907 | 132182116 | 39210  | 28  | -0.304324 | 0.02798  | 132141027 | 132144787 | 132181940 | 13218229  |
| 72 NA19144  | [2515685 chr2 | 2 | 132251787 | 132323964 | 72178  | 91  | -0.338918 | 0.01501  | 132251594 | 132251980 | 132323290 | 13232463  |
| 73 NA19144  | [2515685 chr2 | 2 | 132332382 | 132340886 | 8505   | 6   | -0.428643 | 0.058331 | 132331267 | 132333497 | 132340628 | 13234114  |
| 74 NA19144  | [2515685 chr2 | 2 | 132871605 | 132873051 | 1447   | 2   | 0.699174  | 0.125109 | 132871306 | 132871904 | 132872791 | 13287331  |
| 75 NA19144  | [2515685 chr2 | 2 | 146693999 | 146710744 | 16746  | 17  | 0.86541   | 0.041344 | 146688620 | 146697098 | 146710557 | 14671093  |
| 76 NA19144  | [2515685 chr2 | 2 | 153622711 | 153625256 | 2546   | 3   | 0.922319  | 0.092957 | 153621175 | 153624247 | 153625088 | 15362542  |
| 77 NA19144  | [2515685 chr2 | 2 | 208176479 | 208184457 | 7979   | 7   | 0.856352  | 0.060071 | 208176093 | 208176865 | 208183930 | 20818498  |
| 78 NA19144  | [2515685 chr2 | 2 | 240700660 | 240702469 | 1810   | 2   | -0.523174 | 0.093561 | 240700238 | 240701082 | 240702135 | 24070280  |
| 79 NA19144  | [2515685 chr2 | 2 | 242664580 | 242668683 | 4104   | 9   | 0.837328  | 0.039558 | 242664284 | 242664877 | 242668532 | 24266883  |
| 80 NA19144  | [2515685 chr2 | 2 | 242735142 | 242760537 | 25396  | 32  | -0.554179 | 0.026404 | 242734902 | 242735383 | 242759785 | 24276128  |
| 81 NA19144  | [2515685 chr3 | 3 | 204650    | 209394    | 4745   | 4   | 0.881899  | 0.074703 | 202918    | 206383    | 209009    | 209775    |
| 82 NA19144  | [2515685 chr3 | 3 | 1754331   | 1765859   | 11529  | 3   | 0.753648  | 0.098245 | 1752567   | 1756096   | 1762058   | 1797301   |
| 83 NA19144  | [2515685 chr3 | 3 | 13227589  | 13229260  | 1672   | 2   | -0.702121 | 0.120074 | 13227279  | 13227899  | 13228399  | 13230121  |
| 84 NA19144  | [2515685 chr3 | 3 | 42350188  | 42351717  | 1530   | 3   | 0.450183  | 0.080551 | 42349839  | 42350537  | 42351490  | 42351941  |
| 85 NA19144  | [2515685 chr3 | 3 | 46770617  | 46825913  | 55297  | 13  | -1.85876  | 0.058586 | 46770172  | 46771063  | 46825497  | 46826331  |
| 86 NA19144  | [2515685 chr3 | 3 | 62686665  | 62691317  | 4653   | 6   | -0.775836 | 0.06868  | 62686130  | 62687200  | 62690477  | 62692151  |
| 87 NA19144  | [2515685 chr3 | 3 | 76066312  | 76081451  | 15140  | 19  | -0.253711 | 0.032907 | 76065787  | 76066838  | 76081180  | 76081721  |
| 88 NA19144  | [2515685 chr3 | 3 | 76749705  | 76751111  | 1407   | 3   | -0.935476 | 0.084615 | 76749498  | 76749913  | 76750845  | 76751371  |
| 89 NA19144  | [2515685 chr3 | 3 | 109186593 | 109189513 | 2921   | 3   | -0.630949 | 0.086896 | 109185785 | 109187401 | 109189157 | 10918986  |
| 90 NA19144  | [2515685 chr3 | 3 | 116139491 | 116150775 | 11285  | 12  | -0.946236 | 0.045048 | 116137943 | 116141040 | 116146974 | 11615548  |
| 91 NA19144  | [2515685 chr3 | 3 | 139287057 | 139289507 | 2451   | 3   | 0.739694  | 0.102025 | 139286041 | 139288073 | 139289200 | 13928981  |
| 92 NA19144  | [2515685 chr3 | 3 | 163994592 | 164106273 | 111682 | 102 | 2.094619  | 0.024713 | 163993392 | 163995793 | 164106029 | 16410651  |
| 93 NA19144  | [2515685 chr3 | 3 | 164200660 | 164204121 | 3462   | 4   | -4.527185 | 0.198834 | 164200187 | 164201133 | 164203568 | 16420467  |
| 94 NA19144  | [2515685 chr3 | 3 | 187989840 | 187992508 | 2669   | 3   | -0.753449 | 0.095307 | 187989021 | 187990660 | 187992275 | 18799274  |
| 95 NA19144  | [2515685 chr3 | 3 | 192547312 | 192554331 | 7020   | 10  | 0.763621  | 0.051528 | 192546950 | 192547674 | 192554127 | 19255453  |
| 96 NA19144  | [2515685 chr3 | 3 | 194357854 | 194361639 | 3786   | 4   | 1.487504  | 0.103425 | 194357665 | 194358044 | 194361092 | 19436218  |
| 97 NA19144  | [2515685 chr3 | 3 | 194362463 | 194368035 | 5573   | 6   | 3.007219  | 0.10961  | 194362187 | 194362739 | 194367817 | 19436825  |
| 98 NA19144  | [2515685 chr3 | 3 | 196876438 | 196935512 | 59075  | 73  | -0.309143 | 0.016715 | 196875530 | 196877347 | 196933767 | 19693725  |
| 99 NA19144  | [2515685 chr3 | 3 | 196951583 | 196958848 | 7266   | 6   | -0.49233  | 0.058738 | 196950744 | 196952423 | 196956437 | 19696126  |
| 100 NA19144 | [2515685 chr3 | 3 | 196991681 | 196993357 | 1677   | 7   | -0.321296 | 0.062699 | 196991423 | 196991939 | 196993124 | 19699359  |
| 101 NA19144 | [2515685 chr3 | 3 | 196995123 | 197002710 | 7588   | 6   | 0.38494   | 0.056757 | 196993591 | 196996656 | 197001535 | 19700388  |



|             |               |   |           |           |        |     |           |          |           |           |           |           |
|-------------|---------------|---|-----------|-----------|--------|-----|-----------|----------|-----------|-----------|-----------|-----------|
| 102 NA19144 | [2515685 chr3 | 3 | 197147595 | 197225563 | 77969  | 99  | -0.253867 | 0.014237 | 197139274 | 197151396 | 197225559 | 197225566 |
| 103 NA19144 | [2515685 chr3 | 3 | 197676671 | 197678510 | 1840   | 3   | -0.410565 | 0.07347  | 197676455 | 197676888 | 197678055 | 19767896  |
| 104 NA19144 | [2515685 chr3 | 3 | 198422794 | 198427408 | 4615   | 2   | 0.83186   | 0.125735 | 198422381 | 198423207 | 198423959 | 19843085  |
| 105 NA19144 | [2515685 chr3 | 3 | 198674426 | 198675470 | 1045   | 6   | 0.378493  | 0.050027 | 198674161 | 198674692 | 198674903 | 19867603  |
| 106 NA19144 | [2515685 chr3 | 3 | 198795901 | 198801656 | 5756   | 5   | -0.693748 | 0.068474 | 198795447 | 198796356 | 198799985 | 19880332  |
| 107 NA19144 | [2515685 chr3 | 3 | 199313925 | 199320828 | 6904   | 14  | -0.476052 | 0.03241  | 199313515 | 199314336 | 199320812 | 19932084  |
| 108 NA19144 | [2515685 chr4 | 4 | 3705731   | 3708427   | 2697   | 2   | -0.571869 | 0.099213 | 3704944   | 3706519   | 3708109   | 370874    |
| 109 NA19144 | [2515685 chr4 | 4 | 8740317   | 8756949   | 16633  | 19  | 1.682449  | 0.026272 | 8740049   | 8740586   | 8756813   | 875708    |
| 110 NA19144 | [2515685 chr4 | 4 | 8998040   | 9046719   | 48680  | 69  | 1.48961   | 0.013952 | 8849955   | 9001243   | 9046129   | 904730    |
| 111 NA19144 | [2515685 chr4 | 4 | 9812346   | 9813108   | 763    | 33  | 0.73465   | 0.02046  | 9812284   | 9812408   | 9812952   | 981326    |
| 112 NA19144 | [2515685 chr4 | 4 | 9887220   | 9910115   | 22896  | 30  | 1.657062  | 0.039739 | 9886886   | 9887555   | 9909843   | 991038    |
| 113 NA19144 | [2515685 chr4 | 4 | 11342986  | 11347570  | 4585   | 6   | -0.825667 | 0.070862 | 11342619  | 11343353  | 11346471  | 1134866   |
| 114 NA19144 | [2515685 chr4 | 4 | 15398208  | 15400310  | 2103   | 2   | -0.585969 | 0.092686 | 15397612  | 15398805  | 15399770  | 1540085   |
| 115 NA19144 | [2515685 chr4 | 4 | 21045633  | 21053532  | 7900   | 8   | -2.820961 | 0.095389 | 21045231  | 21046035  | 21053115  | 2105395   |
| 116 NA19144 | [2515685 chr4 | 4 | 33200574  | 33201715  | 1142   | 2   | 0.791093  | 0.116494 | 33200322  | 33200826  | 33201357  | 3320207   |
| 117 NA19144 | [2515685 chr4 | 4 | 34174420  | 34175437  | 1018   | 2   | -0.617265 | 0.11159  | 34174211  | 34174630  | 34175229  | 3417564   |
| 118 NA19144 | [2515685 chr4 | 4 | 49336198  | 49353130  | 16933  | 42  | 0.259579  | 0.02174  | 49336070  | 49336326  | 49352690  | 4935357   |
| 119 NA19144 | [2515685 chr4 | 4 | 57380811  | 57385462  | 4652   | 5   | -0.686222 | 0.06932  | 57380085  | 57381537  | 57384913  | 5738601   |
| 120 NA19144 | [2515685 chr4 | 4 | 61071090  | 61072115  | 1026   | 2   | 0.665538  | 0.11512  | 61070883  | 61071298  | 61071891  | 6107233   |
| 121 NA19144 | [2515685 chr4 | 4 | 63500237  | 63504889  | 4653   | 5   | -0.803363 | 0.083733 | 63494261  | 63503440  | 63504639  | 6350514   |
| 122 NA19144 | [2515685 chr4 | 4 | 69202095  | 69321049  | 118955 | 73  | 1.418346  | 0.022336 | 69201955  | 69202236  | 69320887  | 6932121   |
| 123 NA19144 | [2515685 chr4 | 4 | 69321049  | 69364139  | 43091  | 37  | 0.558015  | 0.020037 | 69320887  | 69321212  | 69363424  | 6936485   |
| 124 NA19144 | [2515685 chr4 | 4 | 69671789  | 69715729  | 43941  | 48  | 0.538732  | 0.018447 | 69671604  | 69671975  | 69715434  | 6971602   |
| 125 NA19144 | [2515685 chr4 | 4 | 70203549  | 70474479  | 270931 | 263 | 0.293686  | 0.009377 | 70202229  | 70204870  | 70473939  | 7047501   |
| 126 NA19144 | [2515685 chr4 | 4 | 97116411  | 97177143  | 60733  | 2   | -0.629489 | 0.105272 | 97114749  | 97118073  | 97173940  | 9731347   |
| 127 NA19144 | [2515685 chr4 | 4 | 98062244  | 98063447  | 1204   | 2   | 0.657421  | 0.118954 | 98062040  | 98062449  | 98063097  | 9806379   |
| 128 NA19144 | [2515685 chr4 | 4 | 115534073 | 115541546 | 7474   | 9   | 0.825259  | 0.056222 | 115530015 | 115537276 | 115539984 | 11554310  |
| 129 NA19144 | [2515685 chr4 | 4 | 119480683 | 119487782 | 7100   | 5   | -0.834043 | 0.068656 | 119473487 | 119483886 | 119487418 | 11948814  |
| 130 NA19144 | [2515685 chr4 | 4 | 122639779 | 122648653 | 8875   | 6   | -0.798857 | 0.064768 | 122639003 | 122640555 | 122647404 | 12264990  |
| 131 NA19144 | [2515685 chr4 | 4 | 125304905 | 125305983 | 1079   | 2   | 0.812788  | 0.110826 | 125304587 | 125305732 | 125305732 | 12530623  |
| 132 NA19144 | [2515685 chr4 | 4 | 132848421 | 132851466 | 3046   | 4   | -0.838363 | 0.082385 | 132847980 | 132848862 | 132851018 | 13285191  |
| 133 NA19144 | [2515685 chr4 | 4 | 133536055 | 133540723 | 4669   | 3   | -2.175896 | 0.141883 | 133531398 | 133539258 | 133540462 | 13354098  |
| 134 NA19144 | [2515685 chr4 | 4 | 138537751 | 138549906 | 12156  | 14  | 0.882635  | 0.046126 | 138537443 | 138538059 | 138547414 | 13855239  |
| 135 NA19144 | [2515685 chr4 | 4 | 145087975 | 145106330 | 18356  | 12  | 0.438778  | 0.04229  | 145087729 | 145088222 | 145105437 | 14510722  |
| 136 NA19144 | [2515685 chr4 | 4 | 145241837 | 145250378 | 8542   | 8   | -0.367178 | 0.055494 | 145241488 | 145242187 | 145250020 | 14525073  |
| 137 NA19144 | [2515685 chr4 | 4 | 145298575 | 145361219 | 62645  | 53  | -0.346057 | 0.020799 | 145298323 | 145298828 | 145360838 | 14536160  |
| 138 NA19144 | [2515685 chr4 | 4 | 153147415 | 153151949 | 4535   | 5   | -0.813548 | 0.070563 | 153146836 | 153147995 | 153151358 | 15315254  |
| 139 NA19144 | [2515685 chr4 | 4 | 162578301 | 162579832 | 1532   | 2   | -0.733604 | 0.112871 | 162577752 | 162578850 | 162579615 | 16258004  |
| 140 NA19144 | [2515685 chr4 | 4 | 162806038 | 162809269 | 3232   | 3   | 0.697744  | 0.084763 | 162804872 | 162807204 | 162808734 | 16280980  |
| 141 NA19144 | [2515685 chr4 | 4 | 169184442 | 169368370 | 183929 | 160 | 0.757178  | 0.012529 | 169184090 | 169184794 | 169366713 | 16937002  |
| 142 NA19144 | [2515685 chr4 | 4 | 181510330 | 181513372 | 3043   | 4   | -0.774528 | 0.080344 | 181509772 | 181510889 | 18151367  | 18151367  |
| 143 NA19144 | [2515685 chr4 | 4 | 185533276 | 185544436 | 11161  | 10  | 0.884323  | 0.051018 | 185532696 | 185533857 | 185542450 | 18554642  |
| 144 NA19144 | [2515685 chr4 | 4 | 186816666 | 186819359 | 2694   | 4   | 3.36373   | 0.15025  | 186816420 | 186816912 | 186819049 | 18681967  |
| 145 NA19144 | [2515685 chr4 | 4 | 188255523 | 188269680 | 14158  | 235 | 1.615408  | 0.010307 | 188255215 | 188255831 | 188269403 | 18826995  |
| 146 NA19144 | [2515685 chr4 | 4 | 190528602 | 190533163 | 4562   | 21  | -2.557854 | 0.043707 | 190528058 | 190529146 | 190531664 | 19053466  |
| 147 NA19144 | [2515685 chr4 | 4 | 190845771 | 191059687 | 213917 | 191 | 0.356863  | 0.01055  | 190845056 | 190846486 | 191059242 | 19106013  |
| 148 NA19144 | [2515685 chr5 | 5 | 153687    | 155672    | 1986   | 3   | 0.547191  | 0.083387 | 153444    | 153930    | 155274    | 156071    |
| 149 NA19144 | [2515685 chr5 | 5 | 263283    | 290589    | 27307  | 37  | -0.339069 | 0.024334 | 262766    | 263801    | 290311    | 290867    |
| 150 NA19144 | [2515685 chr5 | 5 | 682536    | 686746    | 4211   | 16  | -0.284986 | 0.035949 | 682483    | 682590    | 686331    | 687162    |
| 151 NA19144 | [2515685 chr5 | 5 | 731749    | 904333    | 172585 | 152 | -0.268381 | 0.01121  | 731185    | 732314    | 904042    | 904624    |
| 152 NA19144 | [2515685 chr5 | 5 | 1075284   | 1079920   | 4637   | 24  | 0.361959  | 0.013239 | 1074709   | 1075859   | 1079566   | 108027    |
| 153 NA19144 | [2515685 chr5 | 5 | 1122995   | 1126517   | 3523   | 38  | 0.361959  | 0.013239 | 1122772   | 1123219   | 1126389   | 1126644   |
| 154 NA19144 | [2515685 chr5 | 5 | 1223248   | 1223930   | 683    | 5   | 1.139307  | 0.064047 | 1223057   | 1223439   | 1223854   | 1224007   |
| 155 NA19144 | [2515685 chr5 | 5 | 17550023  | 17552132  | 2110   | 3   | 0.394984  | 0.077524 | 17549646  | 17550401  | 17551804  | 1755246   |
| 156 NA19144 | [2515685 chr5 | 5 | 17552863  | 17566617  | 13755  | 11  | -0.309899 | 0.044152 | 17552460  | 17553266  | 17566406  | 1756682   |

|             |               |   |           |           |        |     |           |          |           |           |           |           |
|-------------|---------------|---|-----------|-----------|--------|-----|-----------|----------|-----------|-----------|-----------|-----------|
| 157 NA19144 | [2515685 chr5 | 5 | 17570617  | 17643104  | 72488  | 250 | 0.48542   | 0.007456 | 17570551  | 17570684  | 17642455  | 1764375-  |
| 158 NA19144 | [2515685 chr5 | 5 | 17643104  | 17703063  | 59960  | 56  | -0.428385 | 0.020382 | 17642455  | 17643754  | 17702380  | 1770374-  |
| 159 NA19144 | [2515685 chr5 | 5 | 26831997  | 26835654  | 3658   | 3   | -2.248054 | 0.139447 | 26829858  | 26834136  | 26835377  | 2683593-  |
| 160 NA19144 | [2515685 chr5 | 5 | 26836459  | 26837938  | 1480   | 2   | -1.451056 | 0.200268 | 26835932  | 26836987  | 26837469  | 2683840-  |
| 161 NA19144 | [2515685 chr5 | 5 | 34244167  | 34244789  | 623    | 2   | -0.655889 | 0.086166 | 34244105  | 34244230  | 34244564  | 3424501-  |
| 162 NA19144 | [2515685 chr5 | 5 | 68865200  | 68886836  | 21637  | 42  | 0.666222  | 0.02413  | 68864770  | 68865630  | 68886492  | 6888718-  |
| 163 NA19144 | [2515685 chr5 | 5 | 68992108  | 68994317  | 2210   | 8   | -0.315279 | 0.038909 | 68991974  | 68992242  | 68993992  | 6899464-  |
| 164 NA19144 | [2515685 chr5 | 5 | 69320113  | 69447482  | 127370 | 134 | 0.274085  | 0.010177 | 69319633  | 69320593  | 69446320  | 6944864-  |
| 165 NA19144 | [2515685 chr5 | 5 | 69571849  | 69574058  | 2210   | 8   | -0.315279 | 0.038909 | 69571715  | 69571983  | 69573733  | 6957438-  |
| 166 NA19144 | [2515685 chr5 | 5 | 70195200  | 70315647  | 120448 | 114 | 0.291732  | 0.010876 | 70194720  | 70195680  | 70315431  | 7031586-  |
| 167 NA19144 | [2515685 chr5 | 5 | 70340778  | 70346521  | 5744   | 7   | 0.459051  | 0.059011 | 70340020  | 70341537  | 70346074  | 7034696-  |
| 168 NA19144 | [2515685 chr5 | 5 | 70403953  | 70426554  | 22602  | 40  | 0.704183  | 0.024733 | 70403337  | 70404569  | 70425419  | 7042768-  |
| 169 NA19144 | [2515685 chr5 | 5 | 81459045  | 81466223  | 7179   | 2   | -1.374682 | 0.12307  | 81455614  | 81462405  | 81462863  | 8147028-  |
| 170 NA19144 | [2515685 chr5 | 5 | 93928460  | 93933101  | 4642   | 4   | -0.502663 | 0.077083 | 93927706  | 93929215  | 93931984  | 9393421-  |
| 171 NA19144 | [2515685 chr5 | 5 | 97427204  | 97428353  | 1150   | 2   | -3.407395 | 0.206973 | 97426913  | 97427496  | 97428177  | 9742852-  |
| 172 NA19144 | [2515685 chr5 | 5 | 99409393  | 99419037  | 9645   | 13  | -0.72361  | 0.042451 | 99408997  | 99409789  | 99418328  | 9941974-  |
| 173 NA19144 | [2515685 chr5 | 5 | 100776217 | 100777180 | 964    | 2   | -0.494434 | 0.094289 | 100775951 | 100776484 | 100776791 | 10077756- |
| 174 NA19144 | [2515685 chr5 | 5 | 137835848 | 137844134 | 8287   | 6   | 0.493667  | 0.055361 | 137835611 | 137836085 | 137843310 | 13784495- |
| 175 NA19144 | [2515685 chr5 | 5 | 140203081 | 140217091 | 14011  | 17  | 2.30685   | 0.059362 | 140202344 | 140203819 | 140216552 | 14021763- |
| 176 NA19144 | [2515685 chr5 | 5 | 140217091 | 140218928 | 1838   | 2   | 1.082737  | 0.120004 | 140216552 | 140217631 | 140218508 | 14021934- |
| 177 NA19144 | [2515685 chr5 | 5 | 150183322 | 150204419 | 21098  | 11  | -0.665402 | 0.04759  | 150181427 | 150185218 | 150204151 | 15020468- |
| 178 NA19144 | [2515685 chr5 | 5 | 151495251 | 151499062 | 3812   | 6   | -0.605615 | 0.069157 | 151494886 | 151495617 | 151498563 | 15149956- |
| 179 NA19144 | [2515685 chr5 | 5 | 175392637 | 175396761 | 4125   | 6   | -0.468413 | 0.062352 | 175392088 | 175393187 | 175393522 | 17540000- |
| 180 NA19144 | [2515685 chr5 | 5 | 180308895 | 180363417 | 54523  | 52  | 0.470429  | 0.021176 | 180308688 | 180309103 | 180363120 | 18036371- |
| 181 NA19144 | [2515685 chr6 | 6 | 3163      | 21917     | 18755  | 6   | 0.4251    | 0.059371 | 6325      | 6325      | 21741     | 22093     |
| 182 NA19144 | [2515685 chr6 | 6 | 201823    | 327656    | 125834 | 118 | 0.331391  | 0.013246 | 201415    | 202232    | 326993    | 328320    |
| 183 NA19144 | [2515685 chr6 | 6 | 26847605  | 26853682  | 6078   | 7   | 0.408761  | 0.056444 | 26845961  | 26849250  | 26853185  | 2685417-  |
| 184 NA19144 | [2515685 chr6 | 6 | 26990378  | 26991069  | 692    | 2   | -0.61671  | 0.088245 | 26989956  | 26990800  | 26990902  | 2699123-  |
| 185 NA19144 | [2515685 chr6 | 6 | 26998313  | 26998863  | 551    | 3   | -0.539875 | 0.066435 | 26998089  | 26998537  | 26998633  | 2699909-  |
| 186 NA19144 | [2515685 chr6 | 6 | 29954251  | 30017868  | 63618  | 44  | 0.4879    | 0.02287  | 29950833  | 29957670  | 30017587  | 3001814-  |
| 187 NA19144 | [2515685 chr6 | 6 | 30017868  | 30020251  | 2384   | 2   | -0.573682 | 0.099636 | 30017587  | 30018149  | 30019707  | 3002079-  |
| 188 NA19144 | [2515685 chr6 | 6 | 31158178  | 31160444  | 2267   | 2   | 0.685819  | 0.115282 | 31157997  | 31158360  | 31160125  | 3116076-  |
| 189 NA19144 | [2515685 chr6 | 6 | 31438770  | 31442860  | 4091   | 6   | -0.325801 | 0.05515  | 31438396  | 31439144  | 31442341  | 3144337-  |
| 190 NA19144 | [2515685 chr6 | 6 | 31497531  | 31514462  | 16932  | 2   | -0.635085 | 0.108147 | 31497288  | 31497774  | 31513575  | 3151535-  |
| 191 NA19144 | [2515685 chr6 | 6 | 31979322  | 31985590  | 6269   | 5   | -0.966447 | 0.068255 | 31978975  | 31979669  | 31982976  | 3198820-  |
| 192 NA19144 | [2515685 chr6 | 6 | 32133941  | 32137229  | 3289   | 5   | -0.88878  | 0.06352  | 32133710  | 32134172  | 32136889  | 3213757-  |
| 193 NA19144 | [2515685 chr6 | 6 | 32557802  | 32558865  | 1064   | 2   | 0.869536  | 0.11961  | 32557647  | 32557958  | 32558698  | 3255903-  |
| 194 NA19144 | [2515685 chr6 | 6 | 32565102  | 32586862  | 21761  | 3   | -2.884725 | 0.231592 | 32564888  | 32565316  | 32586127  | 3258759-  |
| 195 NA19144 | [2515685 chr6 | 6 | 32605125  | 32605958  | 834    | 2   | -3.178196 | 0.205375 | 32604923  | 32605328  | 32605760  | 3260615-  |
| 196 NA19144 | [2515685 chr6 | 6 | 32631127  | 32632349  | 1223   | 2   | -1.317281 | 0.136659 | 32630911  | 32631343  | 32632089  | 3263261-  |
| 197 NA19144 | [2515685 chr6 | 6 | 32644822  | 32650756  | 5935   | 4   | 0.512629  | 0.08795  | 32644460  | 32645184  | 32650365  | 3265114-  |
| 198 NA19144 | [2515685 chr6 | 6 | 32653862  | 32655482  | 1621   | 3   | 1.44567   | 0.123089 | 32653679  | 32654046  | 32654980  | 3265598-  |
| 199 NA19144 | [2515685 chr6 | 6 | 32666229  | 32667673  | 1445   | 3   | 0.816283  | 0.083913 | 32665899  | 32666560  | 32667507  | 3266783-  |
| 200 NA19144 | [2515685 chr6 | 6 | 32699514  | 32701919  | 2406   | 4   | -0.591159 | 0.073325 | 32699364  | 32699664  | 32701553  | 3270228-  |
| 201 NA19144 | [2515685 chr6 | 6 | 32702716  | 32705737  | 3022   | 3   | -1.506334 | 0.088229 | 32702285  | 32703148  | 32704019  | 3270745-  |
| 202 NA19144 | [2515685 chr6 | 6 | 32712337  | 32760272  | 47936  | 41  | 0.498031  | 0.024968 | 32712193  | 32712482  | 32759956  | 3276058-  |
| 203 NA19144 | [2515685 chr6 | 6 | 35860874  | 35874426  | 13553  | 12  | 0.43206   | 0.041076 | 35858613  | 35863136  | 35873957  | 3587489-  |
| 204 NA19144 | [2515685 chr6 | 6 | 52904796  | 52911861  | 7066   | 9   | -0.77401  | 0.051279 | 52904081  | 52905511  | 52911594  | 5291212-  |
| 205 NA19144 | [2515685 chr6 | 6 | 54036900  | 54042384  | 5485   | 5   | 3.392318  | 0.130051 | 54036573  | 54037227  | 54041771  | 5404299-  |
| 206 NA19144 | [2515685 chr6 | 6 | 74648985  | 74658754  | 9770   | 11  | -0.779357 | 0.046714 | 74648748  | 74649222  | 74655247  | 7466226-  |
| 207 NA19144 | [2515685 chr6 | 6 | 77496676  | 77513673  | 16998  | 11  | 0.723327  | 0.04945  | 77496500  | 77496853  | 77510011  | 7751769-  |
| 208 NA19144 | [2515685 chr6 | 6 | 79023318  | 79093263  | 69946  | 65  | 0.797509  | 0.01936  | 79022028  | 79024609  | 79091909  | 7909461-  |
| 209 NA19144 | [2515685 chr6 | 6 | 102041093 | 102046055 | 4963   | 6   | -0.736912 | 0.066129 | 102040642 | 102041544 | 102045198 | 10204691- |
| 210 NA19144 | [2515685 chr6 | 6 | 103844437 | 103871201 | 26765  | 17  | 2.129755  | 0.062618 | 103843851 | 103845023 | 103868241 | 10387416- |
| 211 NA19144 | [2515685 chr6 | 6 | 115446833 | 115450846 | 4014   | 3   | -0.542273 | 0.091793 | 115446601 | 115447066 | 115450464 | 11545122- |

|             |               |   |           |           |        |     |           |          |           |           |           |          |
|-------------|---------------|---|-----------|-----------|--------|-----|-----------|----------|-----------|-----------|-----------|----------|
| 212 NA19144 | [2515685 chr6 | 6 | 120671191 | 120671916 | 726    | 2   | 0.854649  | 0.105345 | 120670696 | 120671686 | 120671725 | 12067210 |
| 213 NA19144 | [2515685 chr6 | 6 | 168451982 | 168456762 | 4781   | 4   | -0.876625 | 0.078934 | 168451353 | 168452611 | 168456200 | 16845732 |
| 214 NA19144 | [2515685 chr6 | 6 | 170603879 | 170604666 | 788    | 2   | -1.418022 | 0.109764 | 170603541 | 170604217 | 170604339 | 17060499 |
| 215 NA19144 | [2515685 chr7 | 7 | 3384111   | 3392633   | 8523   | 8   | 0.845663  | 0.056965 | 3383451   | 3384772   | 3390107   | 339561!  |
| 216 NA19144 | [2515685 chr7 | 7 | 6524036   | 6536096   | 12061  | 10  | 0.284538  | 0.044968 | 6522526   | 6525547   | 6535612   | 653658(  |
| 217 NA19144 | [2515685 chr7 | 7 | 9609798   | 9614275   | 4478   | 3   | 0.523881  | 0.095702 | 9609495   | 9610102   | 9613135   | 961541!  |
| 218 NA19144 | [2515685 chr7 | 7 | 12288251  | 12337678  | 49428  | 47  | 0.507391  | 0.021948 | 12287700  | 12288802  | 12337381  | 1233797! |
| 219 NA19144 | [2515685 chr7 | 7 | 38144397  | 38146243  | 1847   | 2   | -0.560075 | 0.105257 | 38144086  | 38144708  | 38145734  | 3814675! |
| 220 NA19144 | [2515685 chr7 | 7 | 38154080  | 38178711  | 24632  | 28  | -0.309483 | 0.027366 | 38153653  | 38154508  | 38177987  | 3817943! |
| 221 NA19144 | [2515685 chr7 | 7 | 43774540  | 43856045  | 81506  | 79  | 0.509114  | 0.014716 | 43774344  | 43774737  | 43853730  | 4385836! |
| 222 NA19144 | [2515685 chr7 | 7 | 56535903  | 56544240  | 8338   | 2   | -2.478668 | 0.168805 | 56475495  | 56538429  | 56542365  | 5654611! |
| 223 NA19144 | [2515685 chr7 | 7 | 56652639  | 56670853  | 18215  | 13  | 0.415685  | 0.033602 | 56652228  | 56653051  | 56670516  | 5667119! |
| 224 NA19144 | [2515685 chr7 | 7 | 62652667  | 62670289  | 17623  | 8   | 0.393905  | 0.037265 | 62650114  | 62655193  | 62667763  | 6267326! |
| 225 NA19144 | [2515685 chr7 | 7 | 62685608  | 62696554  | 10947  | 2   | 0.568596  | 0.112176 | 62685051  | 62686165  | 62694028  | 6270061! |
| 226 NA19144 | [2515685 chr7 | 7 | 63995985  | 64010720  | 14736  | 15  | 0.291794  | 0.03795  | 63995676  | 63996294  | 64010307  | 6401113! |
| 227 NA19144 | [2515685 chr7 | 7 | 64035826  | 64045487  | 9662   | 27  | -0.273567 | 0.027601 | 64035788  | 64035864  | 64045069  | 6404590! |
| 228 NA19144 | [2515685 chr7 | 7 | 64053836  | 64079765  | 25930  | 39  | -0.313615 | 0.019999 | 64053642  | 64054030  | 64078845  | 6408068! |
| 229 NA19144 | [2515685 chr7 | 7 | 64429730  | 64455723  | 25994  | 39  | -0.316038 | 0.019968 | 64428756  | 64430705  | 64455526  | 6445592! |
| 230 NA19144 | [2515685 chr7 | 7 | 64565045  | 64590991  | 25947  | 42  | -0.312449 | 0.019361 | 64564855  | 64565236  | 64590084  | 6459189! |
| 231 NA19144 | [2515685 chr7 | 7 | 64690171  | 64725545  | 35375  | 35  | 0.352758  | 0.024209 | 64689761  | 64690582  | 64725209  | 6472588! |
| 232 NA19144 | [2515685 chr7 | 7 | 66185522  | 66204392  | 18871  | 28  | 0.308828  | 0.022367 | 66184873  | 66186172  | 66203966  | 6620481! |
| 233 NA19144 | [2515685 chr7 | 7 | 69866390  | 69869623  | 3234   | 4   | 0.662297  | 0.077488 | 69865412  | 69867368  | 69869269  | 6986997! |
| 234 NA19144 | [2515685 chr7 | 7 | 69869623  | 69871056  | 1434   | 2   | 3.367682  | 0.182337 | 69869269  | 69869978  | 69870420  | 6987169! |
| 235 NA19144 | [2515685 chr7 | 7 | 71771540  | 71788013  | 16474  | 26  | 0.312908  | 0.024436 | 71770949  | 71772131  | 71787589  | 7178843! |
| 236 NA19144 | [2515685 chr7 | 7 | 71934037  | 71936676  | 2640   | 4   | 0.468135  | 0.0527   | 71932902  | 71935172  | 71936173  | 7193717! |
| 237 NA19144 | [2515685 chr7 | 7 | 71962099  | 71964738  | 2640   | 4   | 0.468135  | 0.0527   | 71960964  | 71963234  | 71964235  | 7196524! |
| 238 NA19144 | [2515685 chr7 | 7 | 73763183  | 73772668  | 9486   | 12  | 0.317377  | 0.031842 | 73761028  | 73765339  | 73772507  | 7377282! |
| 239 NA19144 | [2515685 chr7 | 7 | 74138782  | 74152026  | 13245  | 24  | 0.301697  | 0.022457 | 74137741  | 74139824  | 74151075  | 7415297! |
| 240 NA19144 | [2515685 chr7 | 7 | 74561169  | 74564087  | 2919   | 5   | 0.463858  | 0.047137 | 74560944  | 74561394  | 74562951  | 7456522! |
| 241 NA19144 | [2515685 chr7 | 7 | 74589192  | 74592109  | 2918   | 5   | 0.463858  | 0.047137 | 74588967  | 74589417  | 74590974  | 7459324! |
| 242 NA19144 | [2515685 chr7 | 7 | 74617211  | 74620129  | 2919   | 5   | 0.463858  | 0.047137 | 74616986  | 74617436  | 74618993  | 7462126! |
| 243 NA19144 | [2515685 chr7 | 7 | 74765693  | 74781906  | 16214  | 25  | 0.329569  | 0.024767 | 74765043  | 74766343  | 74781415  | 7478239! |
| 244 NA19144 | [2515685 chr7 | 7 | 75803234  | 75817822  | 14589  | 26  | 0.341515  | 0.023062 | 75801169  | 75805299  | 75817169  | 7581847! |
| 245 NA19144 | [2515685 chr7 | 7 | 76173835  | 76175943  | 2109   | 2   | 0.573113  | 0.103914 | 76173564  | 76174106  | 76174852  | 7617703! |
| 246 NA19144 | [2515685 chr7 | 7 | 76295407  | 76298329  | 2923   | 6   | 0.461102  | 0.047364 | 76294268  | 76296547  | 76298105  | 7629855! |
| 247 NA19144 | [2515685 chr7 | 7 | 89455601  | 89456632  | 1032   | 2   | 3.122599  | 0.18458  | 89455373  | 89455830  | 89456225  | 8945703! |
| 248 NA19144 | [2515685 chr7 | 7 | 92972933  | 92976895  | 3963   | 2   | 1.425784  | 0.133622 | 92972732  | 92973135  | 92975569  | 9297822! |
| 249 NA19144 | [2515685 chr7 | 7 | 100227583 | 100241218 | 13636  | 28  | -0.346294 | 0.024894 | 100227176 | 100227991 | 100241009 | 10024142 |
| 250 NA19144 | [2515685 chr7 | 7 | 101572689 | 101591952 | 19264  | 30  | 0.302542  | 0.022097 | 101571598 | 101573780 | 101591540 | 10159236 |
| 251 NA19144 | [2515685 chr7 | 7 | 101706709 | 101911522 | 204814 | 194 | 0.545421  | 0.008438 | 101690888 | 101709235 | 101911437 | 10191160 |
| 252 NA19144 | [2515685 chr7 | 7 | 101916549 | 101925433 | 8885   | 11  | 0.545421  | 0.008438 | 101915986 | 101917112 | 101924670 | 10192619 |
| 253 NA19144 | [2515685 chr7 | 7 | 109034608 | 109048749 | 14142  | 10  | 2.004241  | 0.069381 | 109024063 | 109037134 | 109046953 | 10905054 |
| 254 NA19144 | [2515685 chr7 | 7 | 110688695 | 110692328 | 3634   | 7   | 0.27317   | 0.052939 | 110688431 | 110688960 | 110692054 | 11069260 |
| 255 NA19144 | [2515685 chr7 | 7 | 125639507 | 125644775 | 5269   | 6   | -0.71025  | 0.075305 | 125639054 | 125639961 | 125644046 | 12564550 |
| 256 NA19144 | [2515685 chr7 | 7 | 133243381 | 133245202 | 1822   | 2   | 0.618605  | 0.102565 | 133243008 | 133243755 | 133244207 | 13324619 |
| 257 NA19144 | [2515685 chr7 | 7 | 133245202 | 133257535 | 12334  | 13  | 2.28359   | 0.067746 | 133244207 | 133246197 | 133255009 | 13326093 |
| 258 NA19144 | [2515685 chr7 | 7 | 139646447 | 139656780 | 10334  | 9   | -0.742056 | 0.055441 | 139646220 | 139646674 | 139655248 | 13965831 |
| 259 NA19144 | [2515685 chr7 | 7 | 141495319 | 141505136 | 9818   | 12  | -0.329055 | 0.039925 | 141494721 | 141495918 | 141504428 | 14150584 |
| 260 NA19144 | [2515685 chr7 | 7 | 141505136 | 141521152 | 16017  | 18  | -1.460663 | 0.049147 | 141504428 | 141505844 | 141520892 | 14152141 |
| 261 NA19144 | [2515685 chr7 | 7 | 141521152 | 141526577 | 5426   | 9   | -0.320811 | 0.043963 | 141520892 | 141521412 | 141526109 | 14152704 |
| 262 NA19144 | [2515685 chr7 | 7 | 141859547 | 141861635 | 2089   | 3   | -0.567483 | 0.084954 | 141859116 | 141859979 | 141861094 | 14186217 |
| 263 NA19144 | [2515685 chr7 | 7 | 141962017 | 141993247 | 31231  | 32  | -0.340436 | 0.026165 | 141961693 | 141962342 | 141992651 | 14199384 |
| 264 NA19144 | [2515685 chr7 | 7 | 143346673 | 143348067 | 1395   | 5   | -0.928125 | 0.066603 | 143346643 | 143346704 | 143347806 | 14334832 |
| 265 NA19144 | [2515685 chr7 | 7 | 143472403 | 143473797 | 1395   | 5   | -0.928133 | 0.066604 | 143472142 | 143472664 | 143473766 | 14347382 |
| 266 NA19144 | [2515685 chr7 | 7 | 149169054 | 149177387 | 8334   | 10  | 0.261327  | 0.048129 | 149168616 | 149169492 | 149176774 | 14917800 |

|             |               |   |           |           |        |     |           |          |           |           |           |           |
|-------------|---------------|---|-----------|-----------|--------|-----|-----------|----------|-----------|-----------|-----------|-----------|
| 267 NA19144 | [2515685 chr7 | 7 | 156976112 | 156978464 | 2353   | 2   | 0.666162  | 0.097996 | 156975812 | 156976413 | 156977896 | 15697903  |
| 268 NA19144 | [2515685 chr7 | 7 | 158617060 | 158624554 | 7495   | 6   | 0.773066  | 0.067282 | 158616763 | 158617357 | 158622028 | 15862708  |
| 269 NA19144 | [2515685 chr8 | 8 | 1328256   | 1343509   | 15254  | 45  | -0.423387 | 0.019505 | 1327688   | 1328824   | 1342795   | 1344224   |
| 270 NA19144 | [2515685 chr8 | 8 | 2203520   | 2205691   | 2172   | 2   | -0.654319 | 0.105939 | 2203382   | 2203659   | 2205441   | 2205942   |
| 271 NA19144 | [2515685 chr8 | 8 | 3885315   | 3887416   | 2102   | 2   | 0.541253  | 0.101256 | 3885089   | 3885542   | 3886275   | 3888558   |
| 272 NA19144 | [2515685 chr8 | 8 | 4110204   | 4112526   | 2323   | 2   | 3.769966  | 0.207147 | 4109692   | 4110717   | 4112031   | 4113022   |
| 273 NA19144 | [2515685 chr8 | 8 | 5223782   | 5226887   | 3106   | 2   | 0.660407  | 0.103833 | 5223198   | 5224366   | 5226566   | 5227209   |
| 274 NA19144 | [2515685 chr8 | 8 | 5582875   | 5595677   | 12803  | 10  | 0.783485  | 0.046136 | 5582615   | 5583135   | 5595203   | 5596152   |
| 275 NA19144 | [2515685 chr8 | 8 | 5863204   | 5865192   | 1989   | 2   | 0.714157  | 0.103065 | 5862948   | 5863461   | 5864505   | 5865879   |
| 276 NA19144 | [2515685 chr8 | 8 | 6122828   | 6124783   | 1956   | 2   | 0.67848   | 0.132662 | 6122552   | 6123104   | 6124121   | 6125442   |
| 277 NA19144 | [2515685 chr8 | 8 | 7098713   | 7146048   | 47336  | 165 | 0.284341  | 0.00345  | 7098285   | 7099142   | 7145836   | 7146267   |
| 278 NA19144 | [2515685 chr8 | 8 | 7175574   | 7187950   | 12377  | 23  | 0.284341  | 0.00345  | 7175104   | 7176045   | 7187698   | 7188202   |
| 279 NA19144 | [2515685 chr8 | 8 | 7391234   | 7430731   | 39498  | 121 | 0.284341  | 0.00345  | 7391061   | 7391407   | 7430300   | 7431162   |
| 280 NA19144 | [2515685 chr8 | 8 | 7607253   | 7669670   | 62418  | 209 | 0.284341  | 0.00345  | 7606824   | 7607682   | 7669496   | 7669842   |
| 281 NA19144 | [2515685 chr8 | 8 | 7862281   | 7875014   | 12734  | 24  | 0.284341  | 0.00345  | 7862030   | 7862533   | 7874896   | 7875132   |
| 282 NA19144 | [2515685 chr8 | 8 | 7903980   | 7928723   | 24744  | 73  | 0.284341  | 0.00345  | 7903568   | 7904392   | 7928292   | 7929152   |
| 283 NA19144 | [2515685 chr8 | 8 | 12023134  | 12035286  | 12153  | 20  | 1.389638  | 0.039673 | 1202297   | 12023272  | 12034973  | 12035592  |
| 284 NA19144 | [2515685 chr8 | 8 | 12064899  | 12072888  | 7990   | 22  | 0.484307  | 0.026606 | 12064663  | 12065136  | 12072625  | 12073152  |
| 285 NA19144 | [2515685 chr8 | 8 | 12276602  | 12284041  | 7440   | 11  | 1.148104  | 0.04432  | 12276206  | 12276998  | 12283622  | 12284467  |
| 286 NA19144 | [2515685 chr8 | 8 | 12314351  | 12322179  | 7829   | 19  | 0.483466  | 0.027927 | 12313944  | 12314759  | 12321906  | 12322452  |
| 287 NA19144 | [2515685 chr8 | 8 | 14304286  | 14318714  | 14429  | 16  | -0.770333 | 0.041435 | 14302768  | 14305804  | 14318121  | 14319302  |
| 288 NA19144 | [2515685 chr8 | 8 | 16245461  | 16251509  | 6049   | 6   | -0.916602 | 0.068918 | 16245129  | 16245794  | 16250812  | 16252202  |
| 289 NA19144 | [2515685 chr8 | 8 | 16326242  | 16332169  | 5928   | 3   | -0.452517 | 0.090361 | 16325867  | 16326617  | 16330605  | 16333732  |
| 290 NA19144 | [2515685 chr8 | 8 | 20022286  | 20024771  | 2486   | 2   | -0.686746 | 0.119883 | 20021082  | 20023491  | 20024338  | 20025202  |
| 291 NA19144 | [2515685 chr8 | 8 | 25028407  | 25046917  | 18511  | 15  | -0.945453 | 0.039931 | 25027885  | 25028930  | 25046777  | 25047052  |
| 292 NA19144 | [2515685 chr8 | 8 | 39351178  | 39506673  | 155496 | 158 | 0.751535  | 0.012646 | 39350826  | 39351530  | 39505284  | 39508062  |
| 293 NA19144 | [2515685 chr8 | 8 | 51193670  | 51201152  | 7483   | 11  | -0.863429 | 0.049366 | 51193335  | 51194005  | 51200867  | 51201432  |
| 294 NA19144 | [2515685 chr8 | 8 | 58153251  | 58154575  | 1325   | 2   | 0.723659  | 0.124768 | 58152856  | 58153647  | 58154220  | 58154932  |
| 295 NA19144 | [2515685 chr8 | 8 | 58276887  | 58289214  | 12328  | 6   | 0.70984   | 0.048829 | 58276659  | 58277116  | 58288084  | 58290342  |
| 296 NA19144 | [2515685 chr8 | 8 | 58294677  | 58296106  | 1430   | 2   | 0.707134  | 0.10533  | 58294070  | 58295284  | 58295669  | 58296542  |
| 297 NA19144 | [2515685 chr8 | 8 | 86742169  | 86910255  | 168087 | 97  | 0.473662  | 0.011783 | 86741757  | 86742581  | 86910002  | 86910502  |
| 298 NA19144 | [2515685 chr8 | 8 | 102689939 | 102695510 | 5572   | 5   | -0.849747 | 0.069669 | 102689349 | 102690530 | 102694979 | 102696042 |
| 299 NA19144 | [2515685 chr8 | 8 | 115148105 | 115149916 | 1812   | 2   | -1.007525 | 0.125759 | 115147694 | 115148517 | 115149348 | 115150482 |
| 300 NA19144 | [2515685 chr8 | 8 | 120089066 | 120094001 | 4936   | 3   | -0.709928 | 0.090088 | 120088183 | 120089950 | 120091092 | 120098732 |
| 301 NA19144 | [2515685 chr8 | 8 | 139049762 | 139053994 | 4233   | 6   | 0.842794  | 0.061806 | 139048858 | 139050666 | 139053464 | 139054522 |
| 302 NA19144 | [2515685 chr8 | 8 | 144782655 | 144785960 | 3306   | 2   | 0.539523  | 0.101884 | 144771440 | 144785564 | 144785821 | 144786092 |
| 303 NA19144 | [2515685 chr9 | 9 | 310045    | 312573    | 2529   | 61  | -0.360878 | 0.016099 | 309952    | 310139    | 312407    | 312740    |
| 304 NA19144 | [2515685 chr9 | 9 | 11681858  | 11684653  | 2796   | 5   | -0.872182 | 0.076719 | 11681456  | 11682260  | 11684237  | 11685072  |
| 305 NA19144 | [2515685 chr9 | 9 | 12716223  | 12739588  | 23366  | 21  | -0.86445  | 0.038277 | 12715200  | 12717247  | 12739025  | 12740152  |
| 306 NA19144 | [2515685 chr9 | 9 | 33688323  | 33689560  | 1238   | 2   | -0.670734 | 0.120671 | 33687588  | 33689059  | 33689374  | 33689742  |
| 307 NA19144 | [2515685 chr9 | 9 | 38855853  | 38864184  | 8332   | 15  | -0.256597 | 0.036087 | 38849975  | 38858379  | 38863935  | 38864432  |
| 308 NA19144 | [2515685 chr9 | 9 | 39141292  | 39270168  | 128877 | 228 | -0.407608 | 0.008428 | 39140975  | 39141609  | 39269980  | 39270352  |
| 309 NA19144 | [2515685 chr9 | 9 | 39305054  | 39324833  | 19780  | 25  | 0.294627  | 0.022958 | 39304100  | 39306009  | 39323218  | 39326442  |
| 310 NA19144 | [2515685 chr9 | 9 | 39483646  | 39581458  | 97813  | 170 | -0.417079 | 0.009419 | 39435676  | 39486172  | 39581270  | 39581642  |
| 311 NA19144 | [2515685 chr9 | 9 | 39616339  | 39636120  | 19782  | 26  | 0.297339  | 0.022566 | 39615385  | 39617294  | 39634504  | 39637732  |
| 312 NA19144 | [2515685 chr9 | 9 | 39813768  | 39815652  | 1885   | 3   | -0.593255 | 0.077358 | 39813502  | 39814035  | 39814733  | 39816572  |
| 313 NA19144 | [2515685 chr9 | 9 | 39818431  | 39824227  | 5797   | 12  | 0.260707  | 0.040265 | 39818000  | 39818862  | 39824073  | 39824382  |
| 314 NA19144 | [2515685 chr9 | 9 | 40206743  | 40356383  | 149641 | 298 | -0.481703 | 0.008032 | 40206039  | 40207448  | 40355989  | 40356772  |
| 315 NA19144 | [2515685 chr9 | 9 | 40389069  | 40409006  | 19938  | 30  | 0.305399  | 0.023106 | 40387935  | 40390203  | 40407412  | 40410602  |
| 316 NA19144 | [2515685 chr9 | 9 | 40791442  | 40792035  | 594    | 2   | 0.517015  | 0.100514 | 40791028  | 40791856  | 40791889  | 40792182  |
| 317 NA19144 | [2515685 chr9 | 9 | 40907176  | 40927141  | 19966  | 23  | 0.329046  | 0.025824 | 40905575  | 40908778  | 40926009  | 40928272  |
| 318 NA19144 | [2515685 chr9 | 9 | 41234952  | 41243531  | 8580   | 13  | -0.260707 | 0.039473 | 41234900  | 41235005  | 41241005  | 41249462  |
| 319 NA19144 | [2515685 chr9 | 9 | 41377559  | 41396864  | 19306  | 30  | 0.301399  | 0.023041 | 41375767  | 41379351  | 41395273  | 41398452  |
| 320 NA19144 | [2515685 chr9 | 9 | 41613055  | 41614674  | 1620   | 4   | -0.330114 | 0.062812 | 41612605  | 41613506  | 41614459  | 41614882  |
| 321 NA19144 | [2515685 chr9 | 9 | 41640668  | 41646461  | 5794   | 11  | 0.256707  | 0.041469 | 41640514  | 41640823  | 41646031  | 41646892  |

|             |                |    |           |           |        |     |           |          |           |           |           |           |
|-------------|----------------|----|-----------|-----------|--------|-----|-----------|----------|-----------|-----------|-----------|-----------|
| 322 NA19144 | [2515685 chr9  | 9  | 41649237  | 41651122  | 1886   | 3   | -0.593255 | 0.077358 | 41648318  | 41650157  | 41650855  | 4165138!  |
| 323 NA19144 | [2515685 chr9  | 9  | 41752826  | 41753462  | 637    | 2   | 0.517015  | 0.100514 | 41752412  | 41753240  | 41753273  | 4175365;  |
| 324 NA19144 | [2515685 chr9  | 9  | 41968304  | 41968896  | 593    | 2   | 0.517014  | 0.100514 | 41968158  | 41968450  | 41968482  | 4196931!  |
| 325 NA19144 | [2515685 chr9  | 9  | 41991445  | 41996789  | 5345   | 5   | 0.288197  | 0.057073 | 41991005  | 41991886  | 41994263  | 4200068;  |
| 326 NA19144 | [2515685 chr9  | 9  | 42074739  | 42080673  | 5935   | 9   | 0.330216  | 0.037518 | 42074446  | 42075033  | 42080516  | 4208083;  |
| 327 NA19144 | [2515685 chr9  | 9  | 42289747  | 42293867  | 4121   | 4   | 0.309915  | 0.054571 | 42289281  | 42290213  | 42293571  | 4229416-  |
| 328 NA19144 | [2515685 chr9  | 9  | 42452419  | 42453011  | 593    | 2   | 0.517015  | 0.100514 | 42452273  | 42452565  | 42452597  | 4245342!  |
| 329 NA19144 | [2515685 chr9  | 9  | 42475581  | 42480925  | 5345   | 5   | 0.288197  | 0.057073 | 42475141  | 42476022  | 42478399  | 4248482;  |
| 330 NA19144 | [2515685 chr9  | 9  | 42639862  | 42643779  | 3918   | 8   | -0.424413 | 0.043773 | 42639537  | 42640187  | 42643538  | 4264402;  |
| 331 NA19144 | [2515685 chr9  | 9  | 42645007  | 42646038  | 1032   | 2   | -0.588568 | 0.083226 | 42644851  | 42645163  | 42645769  | 4264630;  |
| 332 NA19144 | [2515685 chr9  | 9  | 42669198  | 42670938  | 1741   | 2   | -0.575712 | 0.074529 | 42668921  | 42669475  | 42670652  | 4267122-  |
| 333 NA19144 | [2515685 chr9  | 9  | 42754727  | 42756705  | 1979   | 3   | -0.772634 | 0.06942  | 42754385  | 42755070  | 42755767  | 4275764-  |
| 334 NA19144 | [2515685 chr9  | 9  | 42759333  | 42765281  | 5949   | 8   | 0.323367  | 0.038689 | 42759037  | 42759629  | 42765124  | 4276543!  |
| 335 NA19144 | [2515685 chr9  | 9  | 42789875  | 42791615  | 1741   | 2   | -0.575712 | 0.074529 | 42789598  | 42790152  | 42791329  | 4279190-  |
| 336 NA19144 | [2515685 chr9  | 9  | 42875403  | 42877381  | 1979   | 3   | -0.772648 | 0.069421 | 42875061  | 42875746  | 42876443  | 4287832!  |
| 337 NA19144 | [2515685 chr9  | 9  | 42880009  | 42885957  | 5949   | 8   | 0.323367  | 0.038689 | 42879713  | 42880305  | 42885800  | 4288611!  |
| 338 NA19144 | [2515685 chr9  | 9  | 43059964  | 43064106  | 4143   | 10  | -0.310386 | 0.042363 | 43059908  | 43060020  | 43064059  | 4306415;  |
| 339 NA19144 | [2515685 chr9  | 9  | 43099953  | 43213436  | 113484 | 239 | -0.498593 | 0.008902 | 43099774  | 43100133  | 43213301  | 4321357-  |
| 340 NA19144 | [2515685 chr9  | 9  | 43414177  | 43441375  | 27199  | 49  | 0.267404  | 0.018867 | 43413946  | 43414408  | 43440909  | 4344184-  |
| 341 NA19144 | [2515685 chr9  | 9  | 43458412  | 43474410  | 15999  | 21  | 0.252744  | 0.031754 | 43458113  | 43458712  | 43473902  | 4347491!  |
| 342 NA19144 | [2515685 chr9  | 9  | 43508682  | 43512213  | 3532   | 6   | 0.446912  | 0.049254 | 43508216  | 43509148  | 43511921  | 4351250!  |
| 343 NA19144 | [2515685 chr9  | 9  | 43720039  | 43721070  | 1032   | 2   | -0.588568 | 0.083226 | 43719883  | 43720195  | 43721081  | 4372133!  |
| 344 NA19144 | [2515685 chr9  | 9  | 43744237  | 43745976  | 1740   | 2   | -0.575712 | 0.074529 | 43743960  | 43744514  | 43745690  | 4374626;  |
| 345 NA19144 | [2515685 chr9  | 9  | 43808781  | 43812530  | 3750   | 4   | 0.523844  | 0.076528 | 43808388  | 43809175  | 43812324  | 4381273!  |
| 346 NA19144 | [2515685 chr9  | 9  | 44319140  | 44340779  | 21640  | 23  | 0.340081  | 0.030547 | 44318931  | 44319349  | 44340724  | 4434083-  |
| 347 NA19144 | [2515685 chr9  | 9  | 45204355  | 45397287  | 192933 | 106 | 0.289305  | 0.013537 | 45202442  | 45206269  | 45397070  | 4539750!  |
| 348 NA19144 | [2515685 chr9  | 9  | 45441271  | 45462417  | 21147  | 14  | 0.329018  | 0.038745 | 45440324  | 45442218  | 45461850  | 4546298!  |
| 349 NA19144 | [2515685 chr9  | 9  | 64949088  | 64958897  | 9810   | 2   | 0.746636  | 0.081633 | 64948675  | 64949502  | 64958664  | 6495913!  |
| 350 NA19144 | [2515685 chr9  | 9  | 65052468  | 65056588  | 4121   | 4   | 0.309917  | 0.054571 | 65052172  | 65052764  | 65056122  | 6505705!  |
| 351 NA19144 | [2515685 chr9  | 9  | 66527571  | 66680774  | 153204 | 186 | 0.277659  | 0.010581 | 66477921  | 66530097  | 66680316  | 6668123;  |
| 352 NA19144 | [2515685 chr9  | 9  | 66815349  | 66828849  | 13501  | 15  | 0.37795   | 0.030713 | 66761966  | 66817875  | 66826323  | 6683372;  |
| 353 NA19144 | [2515685 chr9  | 9  | 67054379  | 67134291  | 79913  | 76  | 0.273547  | 0.013946 | 66986373  | 67056905  | 67133800  | 6713478!  |
| 354 NA19144 | [2515685 chr9  | 9  | 76777070  | 76779384  | 2315   | 2   | 0.930084  | 0.127873 | 76776756  | 76777385  | 76778920  | 7677984!  |
| 355 NA19144 | [2515685 chr9  | 9  | 80878260  | 80879919  | 1660   | 2   | 0.811132  | 0.097301 | 80877780  | 80878740  | 80879539  | 8088029!  |
| 356 NA19144 | [2515685 chr9  | 9  | 81553104  | 81555243  | 2140   | 2   | 0.617797  | 0.094262 | 81552817  | 81553392  | 81553888  | 8155659!  |
| 357 NA19144 | [2515685 chr9  | 9  | 82115579  | 82116978  | 1400   | 2   | -0.807821 | 0.109086 | 82114963  | 82116195  | 82116740  | 8211721!  |
| 358 NA19144 | [2515685 chr9  | 9  | 126050649 | 126055099 | 4451   | 4   | -0.928591 | 0.074492 | 126050359 | 126050940 | 126052573 | 12605912  |
| 359 NA19144 | [2515685 chr9  | 9  | 135438255 | 135444067 | 5813   | 2   | 1.98907   | 0.121498 | 135282803 | 135440781 | 135443016 | 13544511- |
| 360 NA19144 | [2515685 chr9  | 9  | 138188003 | 138189923 | 1921   | 45  | -0.320875 | 0.020735 | 138187808 | 138188198 | 138189840 | 13819000  |
| 361 NA19144 | [2515685 chr10 | 10 | 4279984   | 4282023   | 2040   | 2   | 1.845694  | 0.156802 | 4279599   | 4280370   | 4281521   | 428252!   |
| 362 NA19144 | [2515685 chr10 | 10 | 6693908   | 6703893   | 9986   | 8   | 0.645495  | 0.054923 | 6692231   | 6695585   | 6703779   | 670400!   |
| 363 NA19144 | [2515685 chr10 | 10 | 42564252  | 42565662  | 1411   | 4   | -0.566893 | 0.07352  | 42563949  | 42564556  | 42565423  | 4256590-  |
| 364 NA19144 | [2515685 chr10 | 10 | 46684200  | 46684670  | 471    | 2   | -0.572534 | 0.098358 | 46683917  | 46684484  | 46684514  | 4668482;  |
| 365 NA19144 | [2515685 chr10 | 10 | 47005127  | 47173707  | 168581 | 204 | -0.345881 | 0.010149 | 47005072  | 47005183  | 47173507  | 4717390!  |
| 366 NA19144 | [2515685 chr10 | 10 | 47729110  | 47729542  | 433    | 2   | -0.587173 | 0.104442 | 47728939  | 47729281  | 47729308  | 4772977!  |
| 367 NA19144 | [2515685 chr10 | 10 | 47784708  | 47785178  | 471    | 2   | -0.572535 | 0.098358 | 47784551  | 47784866  | 47784896  | 4778546   |
| 368 NA19144 | [2515685 chr10 | 10 | 48593103  | 48593600  | 498    | 2   | -0.572534 | 0.098358 | 48592794  | 48593413  | 48593443  | 4859375!  |
| 369 NA19144 | [2515685 chr10 | 10 | 48648802  | 48649129  | 328    | 2   | -0.587173 | 0.104442 | 48648568  | 48649036  | 48649063  | 4864919!  |
| 370 NA19144 | [2515685 chr10 | 10 | 51119630  | 51132551  | 12922  | 21  | -0.271951 | 0.027542 | 51119365  | 51119895  | 51132382  | 5113272;  |
| 371 NA19144 | [2515685 chr10 | 10 | 51186006  | 51187734  | 1729   | 2   | -0.743711 | 0.114809 | 51185282  | 51186730  | 51187158  | 5118831-  |
| 372 NA19144 | [2515685 chr10 | 10 | 56117212  | 56139275  | 22064  | 20  | -0.922188 | 0.034535 | 56115764  | 56118661  | 56138931  | 5613961!  |
| 373 NA19144 | [2515685 chr10 | 10 | 58879708  | 58882015  | 2308   | 5   | -0.926975 | 0.080267 | 58879568  | 58879849  | 58881863  | 5888216!  |
| 374 NA19144 | [2515685 chr10 | 10 | 124342606 | 124366738 | 24133  | 27  | -0.373123 | 0.02198  | 124342261 | 124342951 | 124366300 | 12436717  |
| 375 NA19144 | [2515685 chr10 | 10 | 134152860 | 134154904 | 2045   | 2   | -0.503695 | 0.094206 | 134152032 | 134153689 | 134154236 | 13415557- |
| 376 NA19144 | [2515685 chr10 | 10 | 134168766 | 134170259 | 1494   | 17  | -1.402636 | 0.045358 | 134168524 | 134169008 | 134170097 | 13417042- |

|             |                |    |           |           |        |     |           |          |           |           |           |           |
|-------------|----------------|----|-----------|-----------|--------|-----|-----------|----------|-----------|-----------|-----------|-----------|
| 377 NA19144 | [2515685 chr11 | 11 | 3271902   | 3274139   | 2238   | 3   | -0.479144 | 0.076113 | 3271303   | 3272502   | 3273580   | 3274698   |
| 378 NA19144 | [2515685 chr11 | 11 | 3628748   | 3632795   | 4048   | 6   | -1.407019 | 0.069667 | 3625722   | 3631775   | 3632594   | 3632996   |
| 379 NA19144 | [2515685 chr11 | 11 | 4119946   | 4323987   | 204042 | 208 | 0.383755  | 0.009804 | 4116529   | 4123217   | 4323864   | 4324117   |
| 380 NA19144 | [2515685 chr11 | 11 | 4328197   | 4337507   | 9311   | 5   | 0.383755  | 0.009804 | 4324926   | 4332364   | 4334236   | 4343884   |
| 381 NA19144 | [2515685 chr11 | 11 | 5717038   | 5718491   | 1454   | 2   | 3.53934   | 0.215265 | 5716660   | 5717416   | 5718038   | 5718945   |
| 382 NA19144 | [2515685 chr11 | 11 | 5741269   | 5765993   | 24725  | 33  | 1.979935  | 0.038258 | 5741059   | 5741480   | 5765632   | 5766354   |
| 383 NA19144 | [2515685 chr11 | 11 | 11831868  | 11833089  | 1222   | 2   | 0.928438  | 0.120779 | 11831412  | 11832324  | 11832853  | 11833321  |
| 384 NA19144 | [2515685 chr11 | 11 | 18906905  | 18928671  | 21767  | 27  | 0.722828  | 0.029276 | 18906533  | 18907278  | 18928457  | 18928881  |
| 385 NA19144 | [2515685 chr11 | 11 | 21144151  | 21172662  | 28512  | 35  | -0.79455  | 0.027145 | 21143340  | 21144962  | 21172404  | 21172921  |
| 386 NA19144 | [2515685 chr11 | 11 | 28965605  | 28969186  | 3582   | 5   | 4.112823  | 0.155208 | 28965284  | 28965927  | 28968702  | 28969671  |
| 387 NA19144 | [2515685 chr11 | 11 | 30128605  | 30133794  | 5190   | 5   | -0.83131  | 0.07021  | 30127846  | 30129364  | 30133432  | 30134151  |
| 388 NA19144 | [2515685 chr11 | 11 | 48284073  | 48284771  | 699    | 2   | 0.85393   | 0.103822 | 48283862  | 48284285  | 48284572  | 48284971  |
| 389 NA19144 | [2515685 chr11 | 11 | 48997072  | 49001951  | 4880   | 10  | 0.303907  | 0.047801 | 48996760  | 48997384  | 49001459  | 49002447  |
| 390 NA19144 | [2515685 chr11 | 11 | 49072856  | 49075952  | 3097   | 6   | 0.313473  | 0.060259 | 49072572  | 49073140  | 49075650  | 49076257  |
| 391 NA19144 | [2515685 chr11 | 11 | 49665830  | 49716019  | 50190  | 34  | 0.501954  | 0.02593  | 49665251  | 49666410  | 49712748  | 49721987  |
| 392 NA19144 | [2515685 chr11 | 11 | 58566484  | 58611261  | 44778  | 41  | 0.346519  | 0.022944 | 58566228  | 58566741  | 58610975  | 58611547  |
| 393 NA19144 | [2515685 chr11 | 11 | 60721034  | 60777477  | 56444  | 58  | 0.559257  | 0.016141 | 60720112  | 60721956  | 60776810  | 60778147  |
| 394 NA19144 | [2515685 chr11 | 11 | 73815147  | 73817979  | 2833   | 2   | -0.690713 | 0.111458 | 73812981  | 73817313  | 73817746  | 73818217  |
| 395 NA19144 | [2515685 chr11 | 11 | 77329004  | 77348780  | 19777  | 3   | -0.378685 | 0.064595 | 77328780  | 77329229  | 77345509  | 77370221  |
| 396 NA19144 | [2515685 chr11 | 11 | 88266938  | 88303948  | 37011  | 39  | 0.309141  | 0.024334 | 88266424  | 88267453  | 88303762  | 88304137  |
| 397 NA19144 | [2515685 chr11 | 11 | 89184898  | 89189792  | 4895   | 5   | 0.441004  | 0.077306 | 89184243  | 89185554  | 89189177  | 89190407  |
| 398 NA19144 | [2515685 chr11 | 11 | 93334621  | 93341944  | 7324   | 8   | -0.771821 | 0.057093 | 93334320  | 93334923  | 93341681  | 93342207  |
| 399 NA19144 | [2515685 chr11 | 11 | 104427891 | 104437123 | 9233   | 11  | -0.602237 | 0.046545 | 104425560 | 104430223 | 104436554 | 104437697 |
| 400 NA19144 | [2515685 chr11 | 11 | 134107699 | 134112290 | 4592   | 4   | 0.877375  | 0.080314 | 134106591 | 134108808 | 134111845 | 134112737 |
| 401 NA19144 | [2515685 chr12 | 12 | 516001    | 517592    | 1592   | 2   | -0.610117 | 0.110065 | 515433    | 516569    | 517143    | 518042    |
| 402 NA19144 | [2515685 chr12 | 12 | 737326    | 744564    | 7239   | 7   | 0.81943   | 0.055442 | 737064    | 737588    | 743734    | 745394    |
| 403 NA19144 | [2515685 chr12 | 12 | 2116865   | 2127044   | 10180  | 12  | 0.666433  | 0.04373  | 2116538   | 2117192   | 2126809   | 2127279   |
| 404 NA19144 | [2515685 chr12 | 12 | 6113530   | 6117052   | 3523   | 3   | 0.56767   | 0.095625 | 6111640   | 6115421   | 6116289   | 6117816   |
| 405 NA19144 | [2515685 chr12 | 12 | 8262986   | 8269955   | 6970   | 15  | 0.505266  | 0.033962 | 8262374   | 8263598   | 8268864   | 8271046   |
| 406 NA19144 | [2515685 chr12 | 12 | 9439709   | 9445294   | 5586   | 8   | 0.284319  | 0.048145 | 9439120   | 9440298   | 9444589   | 9446000   |
| 407 NA19144 | [2515685 chr12 | 12 | 9524239   | 9624971   | 100733 | 103 | 0.645853  | 0.015902 | 9523968   | 9524510   | 9623223   | 9626720   |
| 408 NA19144 | [2515685 chr12 | 12 | 111110735 | 11118206  | 7472   | 6   | -0.331107 | 0.057359 | 11110423  | 11111048  | 11116820  | 11119597  |
| 409 NA19144 | [2515685 chr12 | 12 | 11398049  | 11436142  | 38094  | 34  | -0.865374 | 0.026903 | 11397507  | 11398591  | 11435669  | 11436617  |
| 410 NA19144 | [2515685 chr12 | 12 | 11438271  | 11463223  | 24953  | 30  | -0.345375 | 0.027339 | 11437879  | 11438663  | 11459990  | 11466457  |
| 411 NA19144 | [2515685 chr12 | 12 | 22462548  | 22477653  | 15106  | 8   | 0.494715  | 0.045264 | 22461792  | 22463304  | 22474599  | 22480707  |
| 412 NA19144 | [2515685 chr12 | 12 | 27539466  | 27545857  | 6392   | 9   | -0.879445 | 0.054654 | 27539237  | 27539695  | 27545179  | 27546537  |
| 413 NA19144 | [2515685 chr12 | 12 | 31155331  | 31161854  | 6524   | 7   | 0.327526  | 0.052403 | 31155092  | 31155571  | 31161033  | 31162671  |
| 414 NA19144 | [2515685 chr12 | 12 | 31168973  | 31245603  | 76631  | 69  | 0.426875  | 0.018109 | 31168656  | 31169291  | 31245343  | 31245867  |
| 415 NA19144 | [2515685 chr12 | 12 | 33989909  | 34000302  | 10394  | 18  | -0.4444   | 0.037473 | 33989629  | 33990189  | 34000127  | 34000477  |
| 416 NA19144 | [2515685 chr12 | 12 | 34244726  | 34252880  | 8155   | 11  | -0.300479 | 0.044946 | 34238230  | 34248404  | 34252581  | 34253181  |
| 417 NA19144 | [2515685 chr12 | 12 | 69156734  | 69168074  | 11341  | 11  | 0.732822  | 0.047843 | 69138649  | 69160412  | 69164396  | 69215017  |
| 418 NA19144 | [2515685 chr12 | 12 | 70475445  | 70476812  | 1368   | 2   | -0.725158 | 0.116321 | 70475180  | 70475711  | 70476524  | 70477107  |
| 419 NA19144 | [2515685 chr12 | 12 | 78656134  | 78665261  | 9128   | 9   | -0.443306 | 0.051526 | 78654687  | 78657582  | 78664736  | 78665787  |
| 420 NA19144 | [2515685 chr12 | 12 | 125345959 | 125354108 | 8150   | 9   | -0.900072 | 0.053086 | 125345717 | 125346201 | 125353801 | 125354417 |
| 421 NA19144 | [2515685 chr12 | 12 | 127322032 | 127326052 | 4021   | 3   | 0.455509  | 0.089491 | 127321371 | 127322694 | 127325619 | 127326487 |
| 422 NA19144 | [2515685 chr12 | 12 | 128864324 | 128871206 | 6883   | 15  | -0.267967 | 0.027776 | 128863938 | 128864711 | 128870489 | 128871927 |
| 423 NA19144 | [2515685 chr12 | 12 | 131046250 | 131046750 | 501    | 2   | 0.737781  | 0.120042 | 131046129 | 131046371 | 131046551 | 131046947 |
| 424 NA19144 | [2515685 chr12 | 12 | 132249060 | 132249924 | 865    | 2   | 1.150119  | 0.126779 | 132248918 | 132249203 | 132249666 | 132250187 |
| 425 NA19144 | [2515685 chr13 | 13 | 25947233  | 25950398  | 3166   | 3   | 2.825899  | 0.140616 | 25946194  | 25948272  | 25949415  | 25951387  |
| 426 NA19144 | [2515685 chr13 | 13 | 33029390  | 33042392  | 13003  | 8   | 0.766142  | 0.057811 | 33000262  | 33034253  | 33041860  | 33042927  |
| 427 NA19144 | [2515685 chr13 | 13 | 56611711  | 56645734  | 34024  | 37  | 0.581136  | 0.017389 | 56610946  | 56612477  | 56645321  | 56646147  |
| 428 NA19144 | [2515685 chr13 | 13 | 56645734  | 56653890  | 8157   | 7   | -0.744157 | 0.057275 | 56645321  | 56646147  | 56650401  | 56657381  |
| 429 NA19144 | [2515685 chr13 | 13 | 56653890  | 56686136  | 32247  | 30  | -2.585374 | 0.046219 | 56650401  | 56657380  | 56685381  | 56686897  |
| 430 NA19144 | [2515685 chr13 | 13 | 56686136  | 56724661  | 38526  | 37  | -0.707492 | 0.026013 | 56685381  | 56686891  | 56724259  | 56725067  |
| 431 NA19144 | [2515685 chr13 | 13 | 68133073  | 68140535  | 7463   | 2   | 0.583348  | 0.101975 | 68131593  | 68134553  | 68138940  | 68142131  |

|             |                |    |           |           |        |     |           |          |           |           |           |           |
|-------------|----------------|----|-----------|-----------|--------|-----|-----------|----------|-----------|-----------|-----------|-----------|
| 432 NA19144 | [2515685 chr13 | 13 | 69633905  | 69673289  | 39385  | 41  | 0.775988  | 0.024945 | 69633412  | 69634399  | 69672985  | 6967359:  |
| 433 NA19144 | [2515685 chr13 | 13 | 110502180 | 110506241 | 4062   | 3   | 0.671981  | 0.090081 | 110501819 | 110502541 | 110502890 | 11050959  |
| 434 NA19144 | [2515685 chr13 | 13 | 113079647 | 113087001 | 7355   | 3   | 0.571369  | 0.082961 | 113078890 | 113080404 | 113082138 | 11309434  |
| 435 NA19144 | [2515685 chr14 | 14 | 18439491  | 18823237  | 383747 | 613 | -0.361851 | 0.003451 | 18437497  | 18441485  | 18823059  | 1882341!  |
| 436 NA19144 | [2515685 chr14 | 14 | 18850162  | 19254367  | 404206 | 705 | -0.361851 | 0.003451 | 18849501  | 18850824  | 19254200  | 1925453!  |
| 437 NA19144 | [2515685 chr14 | 14 | 19380114  | 19494842  | 114729 | 116 | -0.361851 | 0.003451 | 19379922  | 19380306  | 19494444  | 1949524   |
| 438 NA19144 | [2515685 chr14 | 14 | 19619177  | 19625484  | 6308   | 3   | 3.007861  | 0.191878 | 19612261  | 19624114  | 19625018  | 1962595!  |
| 439 NA19144 | [2515685 chr14 | 14 | 20413805  | 20425617  | 11813  | 8   | -0.339427 | 0.046734 | 20413520  | 20414091  | 20425191  | 2042604   |
| 440 NA19144 | [2515685 chr14 | 14 | 20426353  | 20492312  | 65960  | 70  | -0.701093 | 0.018109 | 20426044  | 20426662  | 20492145  | 2049248!  |
| 441 NA19144 | [2515685 chr14 | 14 | 32022775  | 32026140  | 3366   | 2   | -1.063009 | 0.125099 | 32022274  | 32023276  | 32023749  | 3202853   |
| 442 NA19144 | [2515685 chr14 | 14 | 40541595  | 40555554  | 13960  | 18  | -0.774473 | 0.037094 | 40541375  | 40541816  | 40555024  | 4055608   |
| 443 NA19144 | [2515685 chr14 | 14 | 42059344  | 42063443  | 4100   | 2   | 0.782348  | 0.115108 | 42056485  | 42062203  | 42062601  | 4206428!  |
| 444 NA19144 | [2515685 chr14 | 14 | 47372189  | 47373176  | 988    | 2   | -0.603212 | 0.113658 | 47371870  | 47372508  | 47373023  | 4737332!  |
| 445 NA19144 | [2515685 chr14 | 14 | 69086774  | 69092832  | 6059   | 6   | -0.965599 | 0.058939 | 69086153  | 69087395  | 69092239  | 6909342!  |
| 446 NA19144 | [2515685 chr14 | 14 | 73052083  | 73053781  | 1699   | 2   | -0.431302 | 0.083936 | 73051714  | 73052452  | 73052927  | 7305463!  |
| 447 NA19144 | [2515685 chr14 | 14 | 73063409  | 73122855  | 59447  | 49  | 0.662909  | 0.02138  | 73061866  | 73064953  | 73122227  | 7312348:  |
| 448 NA19144 | [2515685 chr14 | 14 | 104717287 | 104719581 | 2295   | 3   | 0.46918   | 0.086554 | 104717048 | 104717527 | 104719037 | 10472012  |
| 449 NA19144 | [2515685 chr14 | 14 | 104766812 | 104778505 | 11694  | 145 | 0.430487  | 0.01049  | 104766457 | 104767167 | 104778286 | 10477872: |
| 450 NA19144 | [2515685 chr15 | 15 | 18410729  | 18431549  | 20821  | 11  | 0.322535  | 0.045265 | 18410066  | 18411392  | 18431298  | 1843180   |
| 451 NA19144 | [2515685 chr15 | 15 | 18702138  | 18750321  | 48184  | 36  | 0.377458  | 0.023976 | 18700632  | 18703644  | 18749923  | 1875071!  |
| 452 NA19144 | [2515685 chr15 | 15 | 18818034  | 18894799  | 76766  | 69  | 0.567052  | 0.018152 | 18817092  | 18818977  | 18894022  | 1889557:  |
| 453 NA19144 | [2515685 chr15 | 15 | 19093277  | 19218887  | 125611 | 138 | 0.405539  | 0.012286 | 19093206  | 19093349  | 19218462  | 1921931:  |
| 454 NA19144 | [2515685 chr15 | 15 | 19338127  | 19466745  | 128619 | 126 | 0.376156  | 0.01267  | 19338043  | 19338211  | 19466696  | 1946679   |
| 455 NA19144 | [2515685 chr15 | 15 | 19761013  | 19790156  | 29144  | 26  | 0.414852  | 0.025168 | 19662785  | 19763507  | 19789809  | 1979050:  |
| 456 NA19144 | [2515685 chr15 | 15 | 19805080  | 19807069  | 1990   | 3   | 0.693078  | 0.077397 | 19804866  | 19805294  | 19806541  | 1980759:  |
| 457 NA19144 | [2515685 chr15 | 15 | 19815164  | 20095142  | 279979 | 239 | 0.444828  | 0.009659 | 19807597  | 19817658  | 20092648  | 2019778:  |
| 458 NA19144 | [2515685 chr15 | 15 | 21051502  | 21068263  | 16762  | 14  | 0.441088  | 0.033256 | 21051321  | 21051684  | 21065769  | 2111638   |
| 459 NA19144 | [2515685 chr15 | 15 | 21606753  | 21614792  | 8040   | 7   | 0.77008   | 0.066447 | 21606459  | 21607047  | 21612298  | 2163669!  |
| 460 NA19144 | [2515685 chr15 | 15 | 22658678  | 22662421  | 3744   | 2   | -1.192023 | 0.123599 | 22658051  | 22659306  | 22659927  | 2266949:  |
| 461 NA19144 | [2515685 chr15 | 15 | 24986053  | 24992250  | 6198   | 7   | 0.74015   | 0.061444 | 24985426  | 24986680  | 24991680  | 2499282!  |
| 462 NA19144 | [2515685 chr15 | 15 | 32469460  | 32484190  | 14731  | 16  | -0.433042 | 0.030139 | 32469063  | 32469858  | 32483260  | 3248512!  |
| 463 NA19144 | [2515685 chr15 | 15 | 32495147  | 32507409  | 12263  | 15  | -0.256334 | 0.036612 | 32494339  | 32495955  | 32506908  | 3250791   |
| 464 NA19144 | [2515685 chr15 | 15 | 32507409  | 32592025  | 84617  | 68  | -0.841906 | 0.021484 | 32506908  | 32507911  | 32591791  | 3259226!  |
| 465 NA19144 | [2515685 chr15 | 15 | 32615013  | 32632980  | 17968  | 21  | -0.388634 | 0.026018 | 32614742  | 32615284  | 32632382  | 3263357!  |
| 466 NA19144 | [2515685 chr15 | 15 | 32641373  | 32657959  | 16587  | 16  | -0.270373 | 0.036654 | 32640565  | 32642181  | 32657605  | 3265831   |
| 467 NA19144 | [2515685 chr15 | 15 | 43106834  | 43111567  | 4734   | 5   | 0.368408  | 0.064522 | 43106498  | 43107171  | 43111071  | 4311206:  |
| 468 NA19144 | [2515685 chr15 | 15 | 74671388  | 74683012  | 11625  | 8   | 0.822081  | 0.059041 | 74671122  | 74671654  | 74680518  | 7469618!  |
| 469 NA19144 | [2515685 chr15 | 15 | 75117585  | 75119946  | 2362   | 4   | 0.814373  | 0.078213 | 75117343  | 75117827  | 75119741  | 7512015:  |
| 470 NA19144 | [2515685 chr15 | 15 | 82333041  | 82335194  | 2154   | 2   | -2.010753 | 0.143951 | 82332284  | 82333799  | 82334729  | 8233566!  |
| 471 NA19144 | [2515685 chr15 | 15 | 98234084  | 98240716  | 6633   | 8   | 0.789705  | 0.058638 | 98233842  | 98234327  | 98239350  | 9824208:  |
| 472 NA19144 | [2515685 chr15 | 15 | 100110023 | 100122682 | 12660  | 38  | 0.936756  | 0.019592 | 100108905 | 100111141 | 100122315 | 10012305: |
| 473 NA19144 | [2515685 chr15 | 15 | 100264033 | 100335483 | 71451  | 51  | 0.267609  | 0.019717 | 100263857 | 100264210 | 100335010 | 10033595: |
| 474 NA19144 | [2515685 chr16 | 16 | 4154420   | 4156482   | 2063   | 2   | -0.496911 | 0.098256 | 4154190   | 4154651   | 4155620   | 415734    |
| 475 NA19144 | [2515685 chr16 | 16 | 5367156   | 5369567   | 2412   | 3   | -0.823589 | 0.081267 | 5366406   | 5367907   | 5369326   | 536980!   |
| 476 NA19144 | [2515685 chr16 | 16 | 16292646  | 16293255  | 610    | 3   | -0.560476 | 0.088903 | 16292396  | 16292896  | 16292938  | 1629357:  |
| 477 NA19144 | [2515685 chr16 | 16 | 16633469  | 16639120  | 5652   | 3   | 0.780341  | 0.091637 | 16632502  | 16634437  | 16638386  | 1663985:  |
| 478 NA19144 | [2515685 chr16 | 16 | 18421594  | 18422204  | 611    | 3   | -0.560475 | 0.088903 | 18421277  | 18421911  | 18421954  | 1842245:  |
| 479 NA19144 | [2515685 chr16 | 16 | 21320882  | 21323686  | 2805   | 18  | 0.340754  | 0.026352 | 21320606  | 21321159  | 21323533  | 2132383!  |
| 480 NA19144 | [2515685 chr16 | 16 | 21475160  | 21502620  | 27461  | 15  | 0.309176  | 0.036853 | 21474882  | 21475438  | 21501101  | 2150414!  |
| 481 NA19144 | [2515685 chr16 | 16 | 21753870  | 21756137  | 2268   | 15  | 0.382312  | 0.027648 | 21753767  | 21753974  | 21755984  | 2175629!  |
| 482 NA19144 | [2515685 chr16 | 16 | 22452875  | 22454874  | 2000   | 13  | 0.382008  | 0.029772 | 22452722  | 22453028  | 22454771  | 2245497!  |
| 483 NA19144 | [2515685 chr16 | 16 | 22555361  | 22618743  | 63383  | 51  | 0.327887  | 0.020524 | 22554963  | 22555760  | 22617181  | 2262030!  |
| 484 NA19144 | [2515685 chr16 | 16 | 28324917  | 28335549  | 10633  | 8   | -0.397529 | 0.052633 | 28324665  | 28325169  | 28334190  | 2833690!  |
| 485 NA19144 | [2515685 chr16 | 16 | 28617225  | 28628569  | 11345  | 10  | -0.39334  | 0.047527 | 28615757  | 28618694  | 28627777  | 2862936:  |
| 486 NA19144 | [2515685 chr16 | 16 | 29300030  | 29302684  | 2655   | 15  | 0.341185  | 0.028777 | 29299742  | 29300318  | 29302391  | 2930297:  |

|             |                |    |          |          |        |     |           |          |          |          |          |          |
|-------------|----------------|----|----------|----------|--------|-----|-----------|----------|----------|----------|----------|----------|
| 487 NA19144 | [2515685 chr16 | 16 | 29402274 | 29404254 | 1981   | 13  | 0.330626  | 0.030514 | 29401985 | 29402564 | 29404073 | 29404431 |
| 488 NA19144 | [2515685 chr16 | 16 | 30141613 | 30144224 | 2612   | 19  | 0.342961  | 0.02527  | 30141325 | 30141901 | 30144043 | 30144401 |
| 489 NA19144 | [2515685 chr16 | 16 | 32159898 | 32160377 | 480    | 2   | -1.495717 | 0.091469 | 32159453 | 32160343 | 32160346 | 32160401 |
| 490 NA19144 | [2515685 chr16 | 16 | 32606692 | 32607164 | 473    | 2   | -1.495717 | 0.091469 | 32606661 | 32606724 | 32606727 | 32607601 |
| 491 NA19144 | [2515685 chr16 | 16 | 33100874 | 33101346 | 473    | 2   | -1.495718 | 0.091469 | 33100436 | 33101312 | 33101315 | 33101371 |
| 492 NA19144 | [2515685 chr16 | 16 | 33157405 | 33157879 | 475    | 2   | -1.495692 | 0.091468 | 33156965 | 33157845 | 33157848 | 33157911 |
| 493 NA19144 | [2515685 chr16 | 16 | 33278793 | 33336055 | 57263  | 53  | 0.318815  | 0.019803 | 33278594 | 33278992 | 33335787 | 33336321 |
| 494 NA19144 | [2515685 chr16 | 16 | 33453739 | 33459376 | 5638   | 2   | -0.921315 | 0.118242 | 33449096 | 33455814 | 33457301 | 33463151 |
| 495 NA19144 | [2515685 chr16 | 16 | 33516539 | 33536297 | 19759  | 20  | 0.36135   | 0.033069 | 33515683 | 33517395 | 33535963 | 33536631 |
| 496 NA19144 | [2515685 chr16 | 16 | 34321631 | 34606125 | 284495 | 314 | -0.409142 | 0.008426 | 34317185 | 34323706 | 34605058 | 34607191 |
| 497 NA19144 | [2515685 chr16 | 16 | 57204541 | 57207585 | 3045   | 3   | 3.1842    | 0.155084 | 57204170 | 57204913 | 57206938 | 57208231 |
| 498 NA19144 | [2515685 chr16 | 16 | 68534746 | 68564761 | 30016  | 43  | -0.261105 | 0.01979  | 68534434 | 68535058 | 68563823 | 68565701 |
| 499 NA19144 | [2515685 chr16 | 16 | 68702274 | 68789580 | 87307  | 117 | -0.405415 | 0.013069 | 68701593 | 68702955 | 68789287 | 68789871 |
| 500 NA19144 | [2515685 chr16 | 16 | 72920370 | 72965445 | 45076  | 42  | -0.522664 | 0.023064 | 72919818 | 72920922 | 72964811 | 72966071 |
| 501 NA19144 | [2515685 chr16 | 16 | 72988296 | 73020378 | 32083  | 55  | -0.270691 | 0.018035 | 72988152 | 72988441 | 73020260 | 73020491 |
| 502 NA19144 | [2515685 chr16 | 16 | 76930776 | 76942282 | 11507  | 9   | 0.625235  | 0.048855 | 76930290 | 76931263 | 76941602 | 76942961 |
| 503 NA19144 | [2515685 chr16 | 16 | 83994929 | 84004613 | 9685   | 81  | -0.962141 | 0.015157 | 83994558 | 83995300 | 84003767 | 84005451 |
| 504 NA19144 | [2515685 chr16 | 16 | 86669849 | 86672366 | 2518   | 2   | -0.735466 | 0.100277 | 86669288 | 86670411 | 86671217 | 86673511 |
| 505 NA19144 | [2515685 chr16 | 16 | 88658787 | 88663439 | 4653   | 4   | -0.568643 | 0.074855 | 88657900 | 88659675 | 88661364 | 88667241 |
| 506 NA19144 | [2515685 chr16 | 16 | 88807512 | 88815501 | 7990   | 4   | 0.400253  | 0.071477 | 88794450 | 88809587 | 88813426 | 88819181 |
| 507 NA19144 | [2515685 chr17 | 17 | 911980   | 915554   | 3575   | 4   | -0.956331 | 0.07924  | 911452   | 912508   | 915413   | 915696   |
| 508 NA19144 | [2515685 chr17 | 17 | 966845   | 970150   | 3306   | 21  | 0.405279  | 0.033806 | 966537   | 967154   | 969378   | 970922   |
| 509 NA19144 | [2515685 chr17 | 17 | 16662933 | 16665630 | 2698   | 5   | -0.623586 | 0.069058 | 16662626 | 16663241 | 16665353 | 16665901 |
| 510 NA19144 | [2515685 chr17 | 17 | 18296513 | 18327516 | 31004  | 37  | 0.401837  | 0.02403  | 18296246 | 18296781 | 18326880 | 18328151 |
| 511 NA19144 | [2515685 chr17 | 17 | 18331255 | 18332345 | 1091   | 2   | -0.737956 | 0.103708 | 18330541 | 18331970 | 18331978 | 18332711 |
| 512 NA19144 | [2515685 chr17 | 17 | 20299935 | 20301374 | 1440   | 2   | -0.737956 | 0.103708 | 20299568 | 20300303 | 20300311 | 20302431 |
| 513 NA19144 | [2515685 chr17 | 17 | 20304465 | 20335856 | 31392  | 38  | 0.364197  | 0.023355 | 20304107 | 20304823 | 20335559 | 20336151 |
| 514 NA19144 | [2515685 chr17 | 17 | 20368735 | 20372821 | 4087   | 6   | 0.317901  | 0.059709 | 20367677 | 20369794 | 20372578 | 20373061 |
| 515 NA19144 | [2515685 chr17 | 17 | 20571353 | 20578410 | 7058   | 6   | 0.416678  | 0.061271 | 20571124 | 20571582 | 20577452 | 20579361 |
| 516 NA19144 | [2515685 chr17 | 17 | 20644041 | 20648732 | 4692   | 4   | 0.506768  | 0.073354 | 20643647 | 20644435 | 20647744 | 20649721 |
| 517 NA19144 | [2515685 chr17 | 17 | 21310665 | 21312592 | 1928   | 3   | -0.568298 | 0.083449 | 21310379 | 21310951 | 21312062 | 21313121 |
| 518 NA19144 | [2515685 chr17 | 17 | 21827503 | 21834574 | 7072   | 3   | 1.175206  | 0.090669 | 21826238 | 21828768 | 21833354 | 21835791 |
| 519 NA19144 | [2515685 chr17 | 17 | 21942843 | 21954909 | 12067  | 18  | -0.351113 | 0.034446 | 21942618 | 21943068 | 21954628 | 21955191 |
| 520 NA19144 | [2515685 chr17 | 17 | 31430406 | 31832750 | 402345 | 426 | 0.559708  | 0.005601 | 31429658 | 31431155 | 31832302 | 31833191 |
| 521 NA19144 | [2515685 chr17 | 17 | 31865078 | 31886556 | 21479  | 51  | 0.559708  | 0.005601 | 31864350 | 31865807 | 31886086 | 31887021 |
| 522 NA19144 | [2515685 chr17 | 17 | 32829500 | 32835174 | 5675   | 6   | 0.715351  | 0.065887 | 32828825 | 32830175 | 32833793 | 32836551 |
| 523 NA19144 | [2515685 chr17 | 17 | 33348268 | 33351216 | 2949   | 7   | -0.29463  | 0.046174 | 33347873 | 33348664 | 33351036 | 33351391 |
| 524 NA19144 | [2515685 chr17 | 17 | 33356741 | 33424374 | 67634  | 130 | 0.53682   | 0.007146 | 33356305 | 33357178 | 33422990 | 33425751 |
| 525 NA19144 | [2515685 chr17 | 17 | 33431039 | 33553834 | 122796 | 59  | 0.53682   | 0.007146 | 33428591 | 33529290 | 33553386 | 33554281 |
| 526 NA19144 | [2515685 chr17 | 17 | 33585313 | 33654387 | 69075  | 98  | 0.53682   | 0.007146 | 33584586 | 33586040 | 33653601 | 33655171 |
| 527 NA19144 | [2515685 chr17 | 17 | 36636559 | 36660007 | 23449  | 22  | -0.428557 | 0.021841 | 36635767 | 36637352 | 36659236 | 36660771 |
| 528 NA19144 | [2515685 chr17 | 17 | 36675530 | 36685343 | 9814   | 10  | -0.428557 | 0.021841 | 36675011 | 36676049 | 36684647 | 36686041 |
| 529 NA19144 | [2515685 chr17 | 17 | 40984136 | 41017119 | 32984  | 45  | -0.338309 | 0.021734 | 40983908 | 40984364 | 41016872 | 41017361 |
| 530 NA19144 | [2515685 chr17 | 17 | 41770024 | 41976044 | 206021 | 236 | -0.382702 | 0.006113 | 41769768 | 41770281 | 41975625 | 41976461 |
| 531 NA19144 | [2515685 chr17 | 17 | 41985208 | 42137658 | 152451 | 143 | -0.382702 | 0.006113 | 41985206 | 41985210 | 42135210 | 42141941 |
| 532 NA19144 | [2515685 chr17 | 17 | 42975972 | 43026670 | 50699  | 64  | 0.899357  | 0.019783 | 42975162 | 42976783 | 43025568 | 43027771 |
| 533 NA19144 | [2515685 chr17 | 17 | 55368842 | 55372541 | 3700   | 5   | 0.480391  | 0.0668   | 55368278 | 55369406 | 55372325 | 55372751 |
| 534 NA19144 | [2515685 chr17 | 17 | 55434888 | 55452955 | 18068  | 28  | 0.438918  | 0.024346 | 55434445 | 55435332 | 55452577 | 55453331 |
| 535 NA19144 | [2515685 chr17 | 17 | 55528788 | 55543551 | 14764  | 2   | 0.848439  | 0.108975 | 55523057 | 55531236 | 55542674 | 55544421 |
| 536 NA19144 | [2515685 chr17 | 17 | 57652724 | 57667804 | 15081  | 15  | 0.429677  | 0.015737 | 57652052 | 57653396 | 57667259 | 57668341 |
| 537 NA19144 | [2515685 chr17 | 17 | 57681793 | 57710692 | 28900  | 46  | 0.429677  | 0.015737 | 57680114 | 57683473 | 57708467 | 57712911 |
| 538 NA19144 | [2515685 chr17 | 17 | 60324488 | 60349141 | 24654  | 33  | -0.365732 | 0.025169 | 60324259 | 60324717 | 60348751 | 60349531 |
| 539 NA19144 | [2515685 chr17 | 17 | 72727658 | 72744757 | 17100  | 13  | 0.590354  | 0.041927 | 72726533 | 72728783 | 72744067 | 72745441 |
| 540 NA19144 | [2515685 chr18 | 18 | 14479667 | 14488455 | 8789   | 10  | 0.266892  | 0.045161 | 14479249 | 14480086 | 14488123 | 14488781 |
| 541 NA19144 | [2515685 chr18 | 18 | 42745190 | 42815602 | 70413  | 24  | -0.318834 | 0.026819 | 42518691 | 42749992 | 42810800 | 42889151 |



|             |                |    |          |          |        |     |           |          |          |          |          |          |
|-------------|----------------|----|----------|----------|--------|-----|-----------|----------|----------|----------|----------|----------|
| 542 NA19144 | [2515685 chr18 | 18 | 61354113 | 61356915 | 2803   | 3   | -0.912658 | 0.096563 | 61352814 | 61355413 | 61356643 | 61357181 |
| 543 NA19144 | [2515685 chr18 | 18 | 61917747 | 61920171 | 2425   | 4   | 2.050902  | 0.116321 | 61917522 | 61917973 | 61919646 | 61920691 |
| 544 NA19144 | [2515685 chr18 | 18 | 74230393 | 74234275 | 3883   | 31  | -0.368669 | 0.019419 | 74229835 | 74230952 | 74234139 | 74234411 |
| 545 NA19144 | [2515685 chr18 | 18 | 74297715 | 74299391 | 1677   | 5   | -0.843561 | 0.067149 | 74297243 | 74298187 | 74299167 | 74299611 |
| 546 NA19144 | [2515685 chr18 | 18 | 74373005 | 74379534 | 6530   | 10  | 0.351795  | 0.037493 | 74372064 | 74373947 | 74378860 | 74380201 |
| 547 NA19144 | [2515685 chr18 | 18 | 74392800 | 74397812 | 5013   | 3   | 0.941082  | 0.103466 | 74390826 | 74394774 | 74396965 | 74398661 |
| 548 NA19144 | [2515685 chr19 | 19 | 14500    | 79514    | 65015  | 52  | 0.331708  | 0.019697 | 13672    | 15329    | 79338    | 79690    |
| 549 NA19144 | [2515685 chr19 | 19 | 310414   | 312953   | 2540   | 14  | -0.361924 | 0.039552 | 309687   | 311142   | 312913   | 312994   |
| 550 NA19144 | [2515685 chr19 | 19 | 331568   | 333129   | 1562   | 2   | 0.780024  | 0.103712 | 331314   | 331822   | 332310   | 333948   |
| 551 NA19144 | [2515685 chr19 | 19 | 8708780  | 8764835  | 56056  | 74  | 0.451226  | 0.013353 | 8708296  | 8709264  | 8763911  | 8765759  |
| 552 NA19144 | [2515685 chr19 | 19 | 20388989 | 20510144 | 121156 | 65  | -0.414074 | 0.018931 | 20388802 | 20389176 | 20509558 | 20510731 |
| 553 NA19144 | [2515685 chr19 | 19 | 22139705 | 22142875 | 3171   | 9   | 0.32561   | 0.052349 | 22139594 | 22139817 | 22142780 | 22142971 |
| 554 NA19144 | [2515685 chr19 | 19 | 22559495 | 22560841 | 1347   | 3   | -0.627693 | 0.090934 | 22559099 | 22559891 | 22560618 | 22561061 |
| 555 NA19144 | [2515685 chr19 | 19 | 22626324 | 22627831 | 1508   | 2   | -0.573128 | 0.110819 | 22626147 | 22626502 | 22627729 | 22627931 |
| 556 NA19144 | [2515685 chr19 | 19 | 22782241 | 23445143 | 662903 | 576 | 0.412379  | 0.006361 | 22781854 | 22782628 | 23444696 | 23445591 |
| 557 NA19144 | [2515685 chr19 | 19 | 23449741 | 23452775 | 3035   | 5   | 0.335781  | 0.061895 | 23449607 | 23449876 | 23451351 | 23454201 |
| 558 NA19144 | [2515685 chr19 | 19 | 24130583 | 24130769 | 187    | 4   | 0.440696  | 0.074293 | 24130564 | 24130602 | 24130748 | 24130791 |
| 559 NA19144 | [2515685 chr19 | 19 | 39419837 | 39421349 | 1513   | 3   | 0.465608  | 0.089165 | 39419616 | 39420059 | 39421018 | 39421168 |
| 560 NA19144 | [2515685 chr19 | 19 | 39929822 | 39931914 | 2093   | 3   | 0.579225  | 0.089221 | 39929473 | 39930171 | 39931687 | 39932141 |
| 561 NA19144 | [2515685 chr19 | 19 | 47903518 | 48492530 | 589013 | 412 | 0.260444  | 0.007123 | 47895299 | 47906372 | 48490564 | 48494491 |
| 562 NA19144 | [2515685 chr19 | 19 | 53100142 | 53151974 | 51833  | 98  | -0.324132 | 0.011149 | 53098980 | 53101305 | 53151638 | 53152311 |
| 563 NA19144 | [2515685 chr19 | 19 | 55248807 | 55253190 | 4384   | 3   | -0.885629 | 0.100765 | 55247902 | 55249712 | 55252939 | 55253441 |
| 564 NA19144 | [2515685 chr19 | 19 | 55285877 | 55336157 | 50281  | 104 | -0.304546 | 0.010766 | 55285730 | 55286025 | 55335244 | 55337071 |
| 565 NA19144 | [2515685 chr19 | 19 | 58210435 | 58244458 | 34024  | 25  | -0.721227 | 0.030807 | 58209863 | 58211007 | 58243893 | 58245021 |
| 566 NA19144 | [2515685 chr19 | 19 | 59247755 | 59251476 | 3722   | 4   | 0.721114  | 0.078163 | 59246427 | 59249084 | 59250683 | 59252261 |
| 567 NA19144 | [2515685 chr19 | 19 | 59491772 | 59498950 | 7179   | 7   | 0.309547  | 0.053959 | 59491568 | 59491977 | 59497077 | 59500821 |
| 568 NA19144 | [2515685 chr19 | 19 | 59940599 | 59983768 | 43170  | 29  | 0.352609  | 0.026238 | 59939799 | 59941400 | 59983557 | 59983971 |
| 569 NA19144 | [2515685 chr19 | 19 | 60958920 | 60976029 | 17110  | 15  | -0.533403 | 0.039178 | 60957933 | 60959907 | 60975748 | 60976311 |
| 570 NA19144 | [2515685 chr20 | 20 | 1494254  | 1511097  | 16844  | 16  | -0.256314 | 0.032085 | 1493697  | 1494812  | 1510534  | 1511661  |
| 571 NA19144 | [2515685 chr20 | 20 | 1511097  | 1532477  | 21381  | 26  | -1.970139 | 0.044353 | 1510534  | 1511660  | 1532182  | 1532771  |
| 572 NA19144 | [2515685 chr20 | 20 | 1533575  | 1544060  | 10486  | 15  | -0.33618  | 0.032963 | 1533384  | 1533766  | 1543588  | 1544531  |
| 573 NA19144 | [2515685 chr20 | 20 | 12617034 | 12623066 | 6033   | 3   | 0.525392  | 0.096256 | 12616451 | 12617617 | 12621070 | 12625061 |
| 574 NA19144 | [2515685 chr20 | 20 | 15249645 | 15251805 | 2161   | 2   | -0.879867 | 0.103104 | 15249381 | 15249909 | 15251287 | 15252321 |
| 575 NA19144 | [2515685 chr20 | 20 | 26002428 | 26011164 | 8737   | 11  | 0.270748  | 0.042563 | 26002382 | 26002475 | 26010947 | 26011381 |
| 576 NA19144 | [2515685 chr20 | 20 | 26147697 | 26165529 | 17833  | 25  | -0.278997 | 0.028698 | 26147451 | 26147944 | 26162148 | 26168911 |
| 577 NA19144 | [2515685 chr20 | 20 | 28194256 | 28269803 | 75548  | 54  | 0.279231  | 0.019338 | 28193683 | 28194830 | 28266114 | 29341561 |
| 578 NA19144 | [2515685 chr20 | 20 | 60774095 | 60775549 | 1455   | 2   | 0.567629  | 0.111863 | 60773792 | 60774399 | 60774869 | 60776221 |
| 579 NA19144 | [2515685 chr20 | 20 | 61708834 | 61711805 | 2972   | 22  | -0.559002 | 0.030986 | 61708573 | 61709096 | 61711616 | 61711991 |
| 580 NA19144 | [2515685 chr20 | 20 | 61752758 | 61754878 | 2121   | 2   | -0.483822 | 0.083847 | 61752142 | 61753375 | 61754167 | 61755581 |
| 581 NA19144 | [2515685 chr20 | 20 | 61770772 | 61773337 | 2566   | 14  | -0.40192  | 0.04253  | 61770072 | 61771473 | 61772214 | 61774461 |
| 582 NA19144 | [2515685 chr20 | 20 | 62113559 | 62121334 | 7776   | 22  | -0.503074 | 0.032475 | 62113491 | 62113628 | 62120828 | 62121841 |
| 583 NA19144 | [2515685 chr21 | 21 | 9879369  | 9969586  | 90218  | 11  | 0.300781  | 0.043171 | 9873683  | 9885055  | 9963900  | 9975321  |
| 584 NA19144 | [2515685 chr21 | 21 | 10175806 | 10200085 | 24280  | 18  | -0.347702 | 0.033905 | 10175546 | 10176067 | 10198728 | 10201441 |
| 585 NA19144 | [2515685 chr22 | 22 | 14474806 | 14832930 | 358125 | 660 | -0.380622 | 0.005253 | 14474622 | 14474991 | 14831369 | 14834491 |
| 586 NA19144 | [2515685 chr22 | 22 | 17385504 | 17403663 | 18160  | 26  | -0.300564 | 0.02798  | 17385031 | 17385977 | 17403006 | 17404321 |
| 587 NA19144 | [2515685 chr22 | 22 | 18744519 | 18874310 | 129792 | 147 | -0.4489   | 0.011915 | 18742262 | 18746777 | 18874085 | 18874531 |
| 588 NA19144 | [2515685 chr22 | 22 | 19379720 | 19419706 | 39987  | 11  | -0.548286 | 0.045955 | 19377046 | 19382395 | 19416806 | 19449921 |
| 589 NA19144 | [2515685 chr22 | 22 | 20033961 | 20121795 | 87835  | 137 | -0.414813 | 0.008386 | 20033693 | 20034230 | 20121548 | 20122041 |
| 590 NA19144 | [2515685 chr22 | 22 | 20137248 | 20243861 | 106614 | 145 | -0.414813 | 0.008386 | 20136561 | 20137935 | 20240961 | 20302281 |
| 591 NA19144 | [2515685 chr22 | 22 | 22600453 | 22727905 | 127453 | 168 | -0.277999 | 0.011516 | 22598667 | 22602240 | 22727685 | 22728121 |
| 592 NA19144 | [2515685 chr22 | 22 | 27394308 | 27435403 | 41096  | 7   | 0.264356  | 0.051185 | 27354515 | 27397208 | 27432503 | 27508831 |
| 593 NA19144 | [2515685 chr22 | 22 | 33619409 | 33623490 | 4082   | 5   | 0.752682  | 0.066888 | 33618939 | 33619879 | 33622642 | 33624331 |
| 594 NA19144 | [2515685 chr22 | 22 | 43455661 | 43456925 | 1265   | 2   | -3.588416 | 0.233285 | 43455369 | 43455954 | 43456505 | 43457341 |
| 595 NA19144 | [2515685 chr22 | 22 | 44150680 | 44156545 | 5866   | 2   | -0.720012 | 0.106102 | 44150466 | 44150895 | 44155221 | 44157871 |
| 596 NA19144 | [2515685 chrX  | 23 | 1863641  | 1865837  | 2197   | 4   | -0.467469 | 0.074611 | 1862943  | 1864339  | 1865399  | 1866271  |

|             |               |    |           |           |        |     |           |          |           |           |           |           |
|-------------|---------------|----|-----------|-----------|--------|-----|-----------|----------|-----------|-----------|-----------|-----------|
| 597 NA19144 | [2515685 chrX | 23 | 2286200   | 2288297   | 2098   | 2   | 0.60181   | 0.087413 | 2285671   | 2286730   | 2287550   | 228904!   |
| 598 NA19144 | [2515685 chrX | 23 | 9179306   | 9192056   | 12751  | 17  | 0.398288  | 0.034482 | 9179076   | 9179536   | 9191527   | 919258!   |
| 599 NA19144 | [2515685 chrX | 23 | 47714935  | 47718658  | 3724   | 2   | 0.583695  | 0.103856 | 47714701  | 47715170  | 47715435  | 4772188;  |
| 600 NA19144 | [2515685 chrX | 23 | 48917673  | 49070905  | 153233 | 84  | 0.271837  | 0.012624 | 48917258  | 48918088  | 49070239  | 4907157;  |
| 601 NA19144 | [2515685 chrX | 23 | 57629535  | 57637875  | 8341   | 12  | 2.509919  | 0.065742 | 57624754  | 57633746  | 57634786  | 5764096-  |
| 602 NA19144 | [2515685 chrX | 23 | 66907318  | 66913276  | 5959   | 6   | -1.617399 | 0.087651 | 66881715  | 66911529  | 66913165  | 6691338;  |
| 603 NA19144 | [2515685 chrX | 23 | 105355082 | 105361289 | 6208   | 17  | 1.174087  | 0.055664 | 105352123 | 105358042 | 105359168 | 10536341! |
| 604 NA19144 | [2515685 chrX | 23 | 105478359 | 105479862 | 1504   | 2   | -0.783377 | 0.095378 | 105477870 | 105478848 | 105479594 | 10548013  |
| 605 NA19144 | [2515685 chrX | 23 | 114784456 | 114821267 | 36812  | 76  | -0.304281 | 0.013926 | 114784169 | 114784743 | 114817056 | 11483607! |
| 606 NA19144 | [2515685 chrX | 23 | 134597232 | 134608352 | 11121  | 17  | 0.35664   | 0.028127 | 134597077 | 134597387 | 134608171 | 13460853  |
| 607 NA19144 | [2515685 chrX | 23 | 134662909 | 134673907 | 10999  | 16  | 0.362073  | 0.028554 | 134662728 | 134663090 | 134673861 | 13467395  |
| 608 NA19144 | [2515685 chrX | 23 | 134750696 | 134755274 | 4579   | 10  | 0.266885  | 0.039326 | 134750516 | 134750876 | 134755112 | 13475543  |
| 609 NA19144 | [2515685 chrX | 23 | 139811649 | 139834292 | 22644  | 36  | 0.427403  | 0.019074 | 139811533 | 139811766 | 139830081 | 13984227- |
| 610 NA19144 | [2515685 chrX | 23 | 140051204 | 140060849 | 9646   | 17  | 0.430509  | 0.028777 | 140043259 | 140055415 | 140060733 | 14006096  |
| 611 NA19144 | [2515685 chrX | 23 | 140386431 | 140413881 | 27451  | 41  | 0.390985  | 0.018149 | 140378397 | 140390642 | 140411067 | 14041669  |
| 612 NA19144 | [2515685 chrX | 23 | 140500217 | 140510513 | 10297  | 14  | 0.504795  | 0.030827 | 140492162 | 140504428 | 140510409 | 14051061- |
| 613 NA19144 | [2515685 chrX | 23 | 146068677 | 146075231 | 6555   | 16  | 0.308215  | 0.033455 | 146068435 | 146068920 | 146074535 | 14607592- |
| 614 NA19144 | [2515685 chrX | 23 | 148352436 | 148355137 | 2702   | 4   | -3.031339 | 0.14347  | 148350921 | 148353952 | 148354969 | 14835530  |
| 615 NA19144 | [2515685 chrX | 23 | 148355625 | 148356251 | 627    | 2   | -1.603853 | 0.138711 | 148355305 | 148355945 | 148356092 | 14835641  |
| 616 NA19144 | [2515685 chrX | 23 | 148356839 | 148358434 | 1596   | 2   | -3.700635 | 0.209498 | 148356689 | 148356989 | 148357426 | 14835944  |
| 617 NA19144 | [2515685 chrX | 23 | 148587976 | 148691824 | 103849 | 68  | 0.576284  | 0.01833  | 148581850 | 148592187 | 148687613 | 14875988  |
| 618 NA19144 | [2515685 chrX | 23 | 154653800 | 154656039 | 2240   | 2   | -0.897953 | 0.10988  | 154652741 | 154654860 | 154655183 | 15465689  |
| 619 NA19144 | [2515685 chrY | 24 | 1863641   | 1865837   | 2197   | 4   | -0.467469 | 0.074611 | 1862943   | 1864339   | 1865399   | 186627!   |
| 620 NA19144 | [2515685 chrY | 24 | 2286200   | 2288297   | 2098   | 2   | 0.60181   | 0.087413 | 2285671   | 2286730   | 2287550   | 228904!   |
| 621 NA19144 | [2515685 chrY | 24 | 9227858   | 9234779   | 6922   | 25  | 0.292805  | 0.021739 | 9227746   | 9227970   | 9234673   | 923488!   |
| 622 NA19144 | [2515685 chrY | 24 | 9273464   | 9275427   | 1964   | 11  | 0.33208   | 0.032155 | 9273338   | 9273590   | 9275343   | 927551!   |
| 623 NA19144 | [2515685 chrY | 24 | 9927635   | 9934568   | 6934   | 26  | 0.291175  | 0.021398 | 9927523   | 9927747   | 9934492   | 993464!   |
| 624 NA19144 | [2515685 chrY | 24 | 10326793  | 10340296  | 13504  | 7   | 0.299012  | 0.051358 | 10325529  | 10328058  | 10339804  | 1034078!  |
| 625 NA19144 | [2515685 chrY | 24 | 23624926  | 23649003  | 24078  | 50  | -0.485559 | 0.017827 | 23624485  | 23625368  | 23648757  | 2364924!  |
| 626 NA19144 | [2515685 chrY | 24 | 23716390  | 23764324  | 47935  | 115 | -0.433928 | 0.011732 | 23716144  | 23716636  | 23763883  | 2376476!  |
| 627 NA19144 | [2515685 chrY | 24 | 25258650  | 25285076  | 26427  | 53  | -0.323484 | 0.008793 | 25258209  | 25259092  | 25284830  | 2528532;  |
| 628 NA19144 | [2515685 chrY | 24 | 25341625  | 25379999  | 38375  | 84  | -0.323484 | 0.008793 | 25341379  | 25341871  | 25379558  | 2538044;  |
| 629 NA19144 | [2515685 chrY | 24 | 57531227  | 57533466  | 2240   | 2   | -0.897963 | 0.109881 | 57530168  | 57532287  | 57532610  | 5753432;  |
| 1 NA18502   | [2515685 chr1 | 1  | 76985     | 80231     | 3247   | 5   | 0.578358  | 0.079576 | 76641     | 77329     | 79974     | 80489     |
| 2 NA18502   | [2515685 chr1 | 1  | 601045    | 612159    | 11115  | 8   | -0.88678  | 0.06291  | 587801    | 604315    | 610122    | 61419!    |
| 3 NA18502   | [2515685 chr1 | 1  | 1853012   | 1854645   | 1634   | 2   | 0.864897  | 0.125821 | 1852616   | 1853409   | 1853816   | 185547!   |
| 4 NA18502   | [2515685 chr1 | 1  | 1878981   | 1891801   | 12821  | 21  | 0.274416  | 0.038829 | 1878777   | 1879185   | 1891560   | 189204;   |
| 5 NA18502   | [2515685 chr1 | 1  | 10308196  | 10312662  | 4467   | 4   | -0.737931 | 0.097969 | 10307839  | 10308553  | 10312212  | 1031311;  |
| 6 NA18502   | [2515685 chr1 | 1  | 10416438  | 10418311  | 1874   | 2   | -1.957854 | 0.156187 | 10415863  | 10417014  | 10417712  | 1041891;  |
| 7 NA18502   | [2515685 chr1 | 1  | 12829971  | 12855019  | 25049  | 42  | 0.275903  | 0.027462 | 12829669  | 12830274  | 12854828  | 1285521!  |
| 8 NA18502   | [2515685 chr1 | 1  | 12887630  | 12926542  | 38913  | 87  | 0.2669    | 0.019083 | 12887352  | 12887909  | 12926307  | 1292677!  |
| 9 NA18502   | [2515685 chr1 | 1  | 13114053  | 13153574  | 39522  | 81  | 0.269398  | 0.019792 | 13113809  | 13114298  | 13153534  | 1315361-  |
| 10 NA18502  | [2515685 chr1 | 1  | 13159940  | 13162071  | 2132   | 3   | 0.573929  | 0.102732 | 13159618  | 13160263  | 13161777  | 1316236!  |
| 11 NA18502  | [2515685 chr1 | 1  | 13295528  | 13374371  | 78844  | 47  | 0.290743  | 0.025955 | 13294356  | 13296701  | 13374331  | 1337441;  |
| 12 NA18502  | [2515685 chr1 | 1  | 13380737  | 13382868  | 2132   | 3   | 0.573929  | 0.102732 | 13380415  | 13381060  | 13382574  | 1338316-  |
| 13 NA18502  | [2515685 chr1 | 1  | 13518505  | 13522174  | 3670   | 4   | -0.657908 | 0.09369  | 13517560  | 13519451  | 13521947  | 1352240-  |
| 14 NA18502  | [2515685 chr1 | 1  | 16547682  | 16558905  | 11224  | 13  | 0.315543  | 0.049351 | 16547030  | 16548335  | 16557482  | 1656032!  |
| 15 NA18502  | [2515685 chr1 | 1  | 16579099  | 16590019  | 10921  | 17  | 0.298505  | 0.043156 | 16578908  | 16579291  | 16587726  | 1659231-  |
| 16 NA18502  | [2515685 chr1 | 1  | 16604440  | 16833315  | 228876 | 353 | 0.346348  | 0.009475 | 16604025  | 16604856  | 16832899  | 1683373-  |
| 17 NA18502  | [2515685 chr1 | 1  | 16919056  | 16945170  | 26115  | 42  | 0.345511  | 0.027456 | 16869908  | 16922326  | 16944613  | 1694572-  |
| 18 NA18502  | [2515685 chr1 | 1  | 21483287  | 21545077  | 61791  | 65  | 0.296002  | 0.022184 | 21483049  | 21483526  | 21544654  | 2154550-  |
| 19 NA18502  | [2515685 chr1 | 1  | 25330950  | 25409968  | 79019  | 78  | 0.369334  | 0.020188 | 25330662  | 25331238  | 25409763  | 2541017;  |
| 20 NA18502  | [2515685 chr1 | 1  | 25434769  | 25487480  | 52712  | 26  | 0.317111  | 0.034896 | 25434373  | 25435166  | 25484210  | 2551293;  |
| 21 NA18502  | [2515685 chr1 | 1  | 72478372  | 72524180  | 45809  | 36  | 0.704779  | 0.032206 | 72478140  | 72478604  | 72523661  | 7252470!  |
| 22 NA18502  | [2515685 chr1 | 1  | 83329129  | 83333319  | 4191   | 6   | -0.554152 | 0.074797 | 83328770  | 83329489  | 83333063  | 8333357!  |

|            |               |   |           |           |        |     |           |          |           |           |           |          |
|------------|---------------|---|-----------|-----------|--------|-----|-----------|----------|-----------|-----------|-----------|----------|
| 23 NA18502 | [2515685 chr1 | 1 | 89188117  | 89190762  | 2646   | 4   | 1.368494  | 0.108366 | 89187764  | 89188470  | 89190458  | 89191067 |
| 24 NA18502 | [2515685 chr1 | 1 | 105728161 | 105735462 | 7302   | 8   | -2.870395 | 0.110526 | 105727820 | 105728503 | 105734532 | 10573639 |
| 25 NA18502 | [2515685 chr1 | 1 | 105749326 | 105762419 | 13094  | 12  | -0.319422 | 0.055954 | 105749151 | 105749501 | 105762104 | 10576273 |
| 26 NA18502 | [2515685 chr1 | 1 | 106524972 | 106529726 | 4755   | 8   | -0.428093 | 0.068727 | 106523060 | 106526885 | 106529568 | 10652988 |
| 27 NA18502 | [2515685 chr1 | 1 | 108444641 | 108449550 | 4910   | 9   | 0.669219  | 0.060056 | 108443817 | 108445466 | 108449224 | 10844987 |
| 28 NA18502 | [2515685 chr1 | 1 | 108501224 | 108505728 | 4505   | 5   | 0.522068  | 0.079576 | 108501157 | 108501291 | 108502458 | 10851318 |
| 29 NA18502 | [2515685 chr1 | 1 | 108690120 | 108702582 | 12463  | 5   | 0.535539  | 0.079576 | 108689968 | 108690272 | 108702408 | 10870275 |
| 30 NA18502 | [2515685 chr1 | 1 | 109934024 | 109966604 | 32581  | 35  | 0.505142  | 0.030441 | 109933789 | 109934260 | 109966387 | 10996682 |
| 31 NA18502 | [2515685 chr1 | 1 | 112405902 | 112416691 | 10790  | 10  | 0.652926  | 0.056269 | 112405415 | 112406389 | 112416423 | 11241696 |
| 32 NA18502 | [2515685 chr1 | 1 | 120099673 | 120120042 | 20370  | 16  | 0.274512  | 0.044528 | 120099027 | 120100320 | 120118035 | 12012204 |
| 33 NA18502 | [2515685 chr1 | 1 | 120517029 | 120517800 | 772    | 19  | 0.251471  | 0.040822 | 120517024 | 120517034 | 120517791 | 12051780 |
| 34 NA18502 | [2515685 chr1 | 1 | 120527756 | 120529650 | 1895   | 27  | 0.317399  | 0.034244 | 120527673 | 120527839 | 120529629 | 12052967 |
| 35 NA18502 | [2515685 chr1 | 1 | 141390474 | 141393320 | 2847   | 57  | 0.285628  | 0.023568 | 141390462 | 141390486 | 141393310 | 14139333 |
| 36 NA18502 | [2515685 chr1 | 1 | 141402380 | 141403151 | 772    | 23  | 0.254411  | 0.037102 | 141402371 | 141402389 | 141403146 | 14140315 |
| 37 NA18502 | [2515685 chr1 | 1 | 142960746 | 142963932 | 3187   | 6   | 0.380526  | 0.072643 | 142960564 | 142960929 | 142963785 | 14296407 |
| 38 NA18502 | [2515685 chr1 | 1 | 144888479 | 144904909 | 16431  | 23  | 0.27409   | 0.037145 | 144888103 | 144888856 | 144904493 | 14490532 |
| 39 NA18502 | [2515685 chr1 | 1 | 145814302 | 146245012 | 430711 | 466 | 0.254829  | 0.008258 | 145812747 | 145815857 | 146244582 | 14624544 |
| 40 NA18502 | [2515685 chr1 | 1 | 146808546 | 146809451 | 906    | 2   | -0.719099 | 0.130794 | 146808090 | 146809003 | 146809142 | 14680976 |
| 41 NA18502 | [2515685 chr1 | 1 | 171528686 | 171533429 | 4744   | 5   | -2.365094 | 0.110047 | 171528423 | 171528950 | 171533245 | 17153361 |
| 42 NA18502 | [2515685 chr1 | 1 | 193443495 | 193555075 | 111581 | 96  | -0.878903 | 0.021112 | 193443280 | 193443710 | 193554890 | 19355526 |
| 43 NA18502 | [2515685 chr1 | 1 | 193619849 | 193648606 | 28758  | 21  | -0.475343 | 0.040322 | 193619444 | 193620254 | 193648353 | 19364886 |
| 44 NA18502 | [2515685 chr1 | 1 | 204086494 | 204125173 | 38680  | 48  | 0.284961  | 0.025682 | 204085868 | 204087121 | 204125155 | 20412519 |
| 45 NA18502 | [2515685 chr1 | 1 | 204229515 | 204235652 | 6138   | 5   | -0.672742 | 0.083313 | 204228648 | 204230383 | 204235034 | 20423627 |
| 46 NA18502 | [2515685 chr1 | 1 | 220392381 | 220401238 | 8858   | 3   | -0.546763 | 0.102732 | 220383037 | 220395651 | 220399276 | 22040320 |
| 47 NA18502 | [2515685 chr1 | 1 | 233202665 | 233204956 | 2292   | 42  | -0.904522 | 0.027459 | 233202312 | 233203018 | 233204364 | 23320554 |
| 48 NA18502 | [2515685 chr1 | 1 | 239367986 | 239493768 | 125783 | 15  | -0.420124 | 0.046473 | 239367734 | 239368239 | 239491355 | 23949618 |
| 49 NA18502 | [2515685 chr1 | 1 | 244941961 | 244945500 | 3540   | 10  | 0.305117  | 0.056269 | 244941769 | 244942154 | 244945385 | 24494561 |
| 50 NA18502 | [2515685 chr1 | 1 | 244960293 | 244962187 | 1895   | 3   | 0.529092  | 0.102732 | 244959817 | 244960769 | 244961807 | 24496256 |
| 51 NA18502 | [2515685 chr1 | 1 | 245053742 | 245055036 | 1295   | 2   | -1.460499 | 0.252906 | 245053467 | 245054017 | 245054669 | 24505540 |
| 52 NA18502 | [2515685 chr1 | 1 | 245064556 | 245068899 | 4344   | 4   | -0.677664 | 0.088898 | 245064115 | 245064998 | 245066998 | 24507080 |
| 53 NA18502 | [2515685 chr1 | 1 | 245085153 | 245086570 | 1418   | 3   | 0.564603  | 0.111337 | 245084844 | 245085462 | 245086234 | 24508690 |
| 54 NA18502 | [2515685 chr1 | 1 | 245125239 | 245128777 | 3539   | 10  | 0.286514  | 0.056269 | 245125124 | 245125355 | 245128584 | 24512897 |
| 55 NA18502 | [2515685 chr2 | 2 | 296456    | 298925    | 2470   | 8   | -1.30911  | 0.064282 | 296213    | 296699    | 298661    | 299189   |
| 56 NA18502 | [2515685 chr2 | 2 | 409864    | 411131    | 1268   | 11  | 0.650294  | 0.05365  | 409612    | 410116    | 411034    | 411225   |
| 57 NA18502 | [2515685 chr2 | 2 | 428208    | 430181    | 1974   | 2   | -0.645668 | 0.125821 | 427844    | 428572    | 429660    | 430702   |
| 58 NA18502 | [2515685 chr2 | 2 | 34606445  | 34644764  | 38320  | 39  | 0.639987  | 0.029217 | 34601818  | 34609397  | 34641812  | 3464839  |
| 59 NA18502 | [2515685 chr2 | 2 | 35896478  | 35905931  | 9454   | 3   | -2.147656 | 0.120434 | 35879425  | 35899430  | 35902979  | 3590982  |
| 60 NA18502 | [2515685 chr2 | 2 | 35963192  | 35964274  | 1083   | 2   | -0.857249 | 0.12582  | 35962986  | 35963398  | 35963758  | 3596479  |
| 61 NA18502 | [2515685 chr2 | 2 | 41150168  | 41161411  | 11244  | 13  | -0.908206 | 0.052725 | 41149866  | 41150471  | 41160114  | 4116270  |
| 62 NA18502 | [2515685 chr2 | 2 | 56563625  | 56567381  | 3757   | 2   | 2.706141  | 0.225263 | 56556559  | 56566577  | 56567035  | 5656772  |
| 63 NA18502 | [2515685 chr2 | 2 | 61675589  | 61676777  | 1189   | 2   | 1.451738  | 0.139094 | 61675200  | 61675979  | 61676468  | 6167708  |
| 64 NA18502 | [2515685 chr2 | 2 | 64253762  | 64429367  | 175606 | 184 | 0.452392  | 0.013205 | 64253365  | 64254159  | 64428853  | 6442988  |
| 65 NA18502 | [2515685 chr2 | 2 | 73922476  | 73948487  | 26012  | 42  | -0.395345 | 0.027787 | 73922222  | 73922730  | 73948060  | 7394891  |
| 66 NA18502 | [2515685 chr2 | 2 | 75296507  | 75298934  | 2428   | 2   | 0.896302  | 0.131489 | 75296056  | 75296959  | 75298532  | 7529933  |
| 67 NA18502 | [2515685 chr2 | 2 | 82611688  | 82617651  | 5964   | 6   | -0.480772 | 0.080985 | 82611267  | 82612109  | 82617377  | 8261792  |
| 68 NA18502 | [2515685 chr2 | 2 | 87797469  | 87798699  | 1231   | 2   | -0.725772 | 0.128253 | 87797177  | 87797761  | 87798323  | 8779907  |
| 69 NA18502 | [2515685 chr2 | 2 | 87810218  | 87821145  | 10928  | 16  | 0.291017  | 0.044484 | 87809943  | 87810494  | 87820117  | 8782217  |
| 70 NA18502 | [2515685 chr2 | 2 | 91038153  | 91040859  | 2707   | 8   | -0.458606 | 0.06291  | 91038027  | 91038280  | 91040613  | 9104110  |
| 71 NA18502 | [2515685 chr2 | 2 | 91489763  | 91550389  | 60627  | 62  | -0.299585 | 0.022599 | 91489674  | 91489852  | 91550292  | 9155048  |
| 72 NA18502 | [2515685 chr2 | 2 | 95843516  | 95894621  | 51106  | 16  | 0.285557  | 0.044484 | 95793351  | 95846468  | 95894525  | 9589471  |
| 73 NA18502 | [2515685 chr2 | 2 | 97613796  | 97614932  | 1137   | 2   | 0.909629  | 0.129537 | 97613553  | 97614040  | 97614467  | 9761539  |
| 74 NA18502 | [2515685 chr2 | 2 | 106342489 | 106344320 | 1832   | 3   | -0.606478 | 0.102732 | 106342146 | 106342832 | 106344055 | 10634458 |
| 75 NA18502 | [2515685 chr2 | 2 | 107475477 | 107477568 | 2092   | 2   | -1.173261 | 0.132567 | 107474333 | 107476621 | 107477239 | 10747789 |
| 76 NA18502 | [2515685 chr2 | 2 | 110155651 | 110166032 | 10382  | 34  | 0.258416  | 0.030606 | 110155632 | 110155670 | 110165975 | 11016608 |
| 77 NA18502 | [2515685 chr2 | 2 | 110512957 | 110523081 | 10125  | 35  | 0.254984  | 0.030163 | 110512801 | 110513113 | 110522891 | 11052327 |

|             |               |   |           |           |        |     |           |          |           |           |           |           |
|-------------|---------------|---|-----------|-----------|--------|-----|-----------|----------|-----------|-----------|-----------|-----------|
| 78 NA18502  | [2515685 chr2 | 2 | 115109089 | 115118866 | 9778   | 8   | -3.042812 | 0.103262 | 115108808 | 115109370 | 115118291 | 11511944  |
| 79 NA18502  | [2515685 chr2 | 2 | 126157405 | 126168349 | 10945  | 5   | -0.639915 | 0.081554 | 126156836 | 126157975 | 126168048 | 12616865  |
| 80 NA18502  | [2515685 chr2 | 2 | 129229413 | 129230774 | 1362   | 2   | -1.112596 | 0.126282 | 129229234 | 129229593 | 129230356 | 12923119  |
| 81 NA18502  | [2515685 chr2 | 2 | 130420955 | 130467050 | 46096  | 54  | -0.317766 | 0.02457  | 130420630 | 130421281 | 130466830 | 130467271 |
| 82 NA18502  | [2515685 chr2 | 2 | 130549125 | 130562910 | 13786  | 29  | -0.360674 | 0.033042 | 130549037 | 130549214 | 130562706 | 13056311  |
| 83 NA18502  | [2515685 chr2 | 2 | 130683006 | 130684437 | 1432   | 2   | -1.012977 | 0.126141 | 130682805 | 130683207 | 130684065 | 13068480  |
| 84 NA18502  | [2515685 chr2 | 2 | 130757537 | 130760902 | 3366   | 7   | 0.377614  | 0.067254 | 130757071 | 130758004 | 130760697 | 13076110  |
| 85 NA18502  | [2515685 chr2 | 2 | 130885569 | 130897796 | 12228  | 18  | -0.317666 | 0.04194  | 130885118 | 130886020 | 130897715 | 13089787  |
| 86 NA18502  | [2515685 chr2 | 2 | 131237169 | 131249494 | 12326  | 28  | -0.348919 | 0.033808 | 131236965 | 131237373 | 131249244 | 13124974  |
| 87 NA18502  | [2515685 chr2 | 2 | 131288823 | 131301010 | 12188  | 18  | -0.297124 | 0.04194  | 131288742 | 131288905 | 131300558 | 13130146  |
| 88 NA18502  | [2515685 chr2 | 2 | 131765082 | 131771709 | 6628   | 7   | -0.476613 | 0.067254 | 131749458 | 131768034 | 131771105 | 13177231  |
| 89 NA18502  | [2515685 chr2 | 2 | 131774192 | 131777174 | 2983   | 3   | -0.638271 | 0.102732 | 131773812 | 131774572 | 131775655 | 13177869  |
| 90 NA18502  | [2515685 chr2 | 2 | 131810915 | 131818870 | 7956   | 18  | -0.397998 | 0.04194  | 131810493 | 131811338 | 131818615 | 13181912  |
| 91 NA18502  | [2515685 chr2 | 2 | 131845513 | 131852310 | 6798   | 11  | -0.442788 | 0.05365  | 131845513 | 131845514 | 131852270 | 13185235  |
| 92 NA18502  | [2515685 chr2 | 2 | 131917827 | 131927973 | 10147  | 18  | -0.444395 | 0.042357 | 131917559 | 131918096 | 131927771 | 13192817  |
| 93 NA18502  | [2515685 chr2 | 2 | 131949198 | 131953962 | 4765   | 6   | -0.575759 | 0.073232 | 131948970 | 131949427 | 131953571 | 13195435  |
| 94 NA18502  | [2515685 chr2 | 2 | 131978914 | 131984033 | 5120   | 8   | 0.316879  | 0.06291  | 131978543 | 131979286 | 131983828 | 13198423  |
| 95 NA18502  | [2515685 chr2 | 2 | 132138938 | 132260307 | 121370 | 132 | -0.324896 | 0.011683 | 132138745 | 132139131 | 132259307 | 13226130  |
| 96 NA18502  | [2515685 chr2 | 2 | 132267554 | 132329674 | 62121  | 76  | -0.324896 | 0.011683 | 132267297 | 132267812 | 132329400 | 13232994  |
| 97 NA18502  | [2515685 chr2 | 2 | 132334309 | 132346526 | 12218  | 11  | -0.324896 | 0.011683 | 132333497 | 132335122 | 132344315 | 13234873  |
| 98 NA18502  | [2515685 chr2 | 2 | 132871108 | 132873051 | 1944   | 3   | 0.754297  | 0.105383 | 132870911 | 132871306 | 132872791 | 13287331  |
| 99 NA18502  | [2515685 chr2 | 2 | 146694146 | 146710744 | 16599  | 17  | 0.713189  | 0.045347 | 146688620 | 146697098 | 146710557 | 14671093  |
| 100 NA18502 | [2515685 chr2 | 2 | 153622711 | 153625256 | 2546   | 3   | 0.786389  | 0.102732 | 153621175 | 153624247 | 153625088 | 15362542  |
| 101 NA18502 | [2515685 chr2 | 2 | 189394371 | 189403817 | 9447   | 8   | -0.90281  | 0.065465 | 189393190 | 189395553 | 189403733 | 18940390  |
| 102 NA18502 | [2515685 chr2 | 2 | 195804965 | 195809805 | 4841   | 5   | -0.660213 | 0.087004 | 195803577 | 195806354 | 195809355 | 19581025  |
| 103 NA18502 | [2515685 chr2 | 2 | 203121095 | 203138582 | 17488  | 19  | -1.012933 | 0.043985 | 203120801 | 203121389 | 203138142 | 20313902  |
| 104 NA18502 | [2515685 chr2 | 2 | 208176479 | 208184457 | 7979   | 7   | 0.786961  | 0.067458 | 208176093 | 208176865 | 208183930 | 20818498  |
| 105 NA18502 | [2515685 chr2 | 2 | 209062820 | 209072411 | 9592   | 14  | -0.741328 | 0.048184 | 209062655 | 209062985 | 209071922 | 20907290  |
| 106 NA18502 | [2515685 chr2 | 2 | 242459186 | 242487471 | 28286  | 44  | 0.25621   | 0.026825 | 242458895 | 242459478 | 242486450 | 24248849  |
| 107 NA18502 | [2515685 chr2 | 2 | 242664580 | 242668683 | 4104   | 10  | 0.574483  | 0.056269 | 242664284 | 242664877 | 242668532 | 24266883  |
| 108 NA18502 | [2515685 chr3 | 3 | 204650    | 209394    | 4745   | 4   | 0.664042  | 0.088969 | 202918    | 206383    | 209009    | 209775    |
| 109 NA18502 | [2515685 chr3 | 3 | 1757211   | 1765706   | 8496   | 2   | 0.864135  | 0.141187 | 1756096   | 1758327   | 1762058   | 179730    |
| 110 NA18502 | [2515685 chr3 | 3 | 26188112  | 26195803  | 7692   | 2   | -0.990568 | 0.171638 | 26187851  | 26188373  | 26195637  | 2619596   |
| 111 NA18502 | [2515685 chr3 | 3 | 37877012  | 37879536  | 2525   | 3   | 0.59193   | 0.102732 | 37876785  | 37877240  | 37879214  | 3787985   |
| 112 NA18502 | [2515685 chr3 | 3 | 46770617  | 46826525  | 55909  | 14  | -0.58932  | 0.048602 | 46770172  | 46771063  | 46826330  | 4682672   |
| 113 NA18502 | [2515685 chr3 | 3 | 68821474  | 68830847  | 9374   | 17  | 0.649643  | 0.043955 | 68818894  | 68824055  | 68830417  | 6883127   |
| 114 NA18502 | [2515685 chr3 | 3 | 75712057  | 75714880  | 2824   | 4   | 0.537381  | 0.088969 | 75711619  | 75712495  | 75714604  | 7571515   |
| 115 NA18502 | [2515685 chr3 | 3 | 102152109 | 102153413 | 1305   | 2   | -0.94791  | 0.127404 | 102151685 | 102152533 | 102153134 | 10215369  |
| 116 NA18502 | [2515685 chr3 | 3 | 105760262 | 105762355 | 2094   | 2   | -0.797067 | 0.133282 | 105759634 | 105760890 | 105761424 | 10576328  |
| 117 NA18502 | [2515685 chr3 | 3 | 105899957 | 105907442 | 7486   | 12  | -0.315092 | 0.051689 | 105899710 | 105900204 | 105907186 | 10590769  |
| 118 NA18502 | [2515685 chr3 | 3 | 109185301 | 109189513 | 4213   | 4   | -0.464539 | 0.088969 | 109184817 | 109185785 | 109189157 | 10918986  |
| 119 NA18502 | [2515685 chr3 | 3 | 117753310 | 117754723 | 1414   | 3   | -0.647757 | 0.102732 | 117753094 | 117753526 | 117754482 | 11775496  |
| 120 NA18502 | [2515685 chr3 | 3 | 127155656 | 127157516 | 1861   | 3   | -0.561581 | 0.102732 | 127155390 | 127155923 | 127157294 | 12715773  |
| 121 NA18502 | [2515685 chr3 | 3 | 131204575 | 131207291 | 2717   | 5   | 0.469885  | 0.079576 | 131204147 | 131205003 | 131206953 | 13120762  |
| 122 NA18502 | [2515685 chr3 | 3 | 139287057 | 139289507 | 2451   | 3   | 0.87592   | 0.109327 | 139286041 | 139288073 | 139289200 | 13928981  |
| 123 NA18502 | [2515685 chr3 | 3 | 163994592 | 164106273 | 111682 | 100 | 2.026848  | 0.02676  | 163993392 | 163995793 | 164106029 | 16410651  |
| 124 NA18502 | [2515685 chr3 | 3 | 164106273 | 164109483 | 3211   | 3   | 0.825181  | 0.12165  | 164106029 | 164106517 | 164108987 | 16410998  |
| 125 NA18502 | [2515685 chr3 | 3 | 164200660 | 164204121 | 3462   | 4   | -0.950856 | 0.096134 | 164200187 | 164201133 | 164203568 | 16420467  |
| 126 NA18502 | [2515685 chr3 | 3 | 191219813 | 191223326 | 3514   | 4   | 0.619854  | 0.090613 | 191219291 | 191220336 | 191222918 | 19122373  |
| 127 NA18502 | [2515685 chr3 | 3 | 192547312 | 192554331 | 7020   | 10  | 0.755194  | 0.056402 | 192546950 | 192547674 | 192554127 | 19255453  |
| 128 NA18502 | [2515685 chr3 | 3 | 194357854 | 194368035 | 10182  | 12  | 1.747321  | 0.070458 | 194357665 | 194358044 | 194367817 | 19436825  |
| 129 NA18502 | [2515685 chr3 | 3 | 196679304 | 196716096 | 36793  | 37  | -0.399475 | 0.029381 | 196677636 | 196680972 | 196715769 | 19671642  |
| 130 NA18502 | [2515685 chr3 | 3 | 196890223 | 196938361 | 48139  | 52  | -0.35974  | 0.024676 | 196889875 | 196890572 | 196937706 | 19693901  |
| 131 NA18502 | [2515685 chr3 | 3 | 198422794 | 198427408 | 4615   | 2   | 0.805583  | 0.136777 | 198422381 | 198423207 | 198437959 | 19843085  |
| 132 NA18502 | [2515685 chr3 | 3 | 199218619 | 199221999 | 3381   | 12  | -0.50814  | 0.051364 | 199218354 | 199218884 | 199220440 | 19922355  |

|             |               |   |           |           |        |     |           |          |           |           |           |          |
|-------------|---------------|---|-----------|-----------|--------|-----|-----------|----------|-----------|-----------|-----------|----------|
| 133 NA18502 | [2515685 chr3 | 3 | 199313925 | 199321063 | 7139   | 15  | 1.383355  | 0.046987 | 199313515 | 199314336 | 199320844 | 19932128 |
| 134 NA18502 | [2515685 chr3 | 3 | 199326743 | 199376829 | 50087  | 60  | 0.259246  | 0.022972 | 199326546 | 199326941 | 199376629 | 19937703 |
| 135 NA18502 | [2515685 chr4 | 4 | 33716     | 39037     | 5322   | 6   | -0.441982 | 0.072643 | 33384     | 34048     | 36636     | 41439    |
| 136 NA18502 | [2515685 chr4 | 4 | 657642    | 674072    | 16431  | 21  | 0.287487  | 0.038829 | 657204    | 658081    | 673843    | 674301   |
| 137 NA18502 | [2515685 chr4 | 4 | 1606053   | 1607707   | 1655   | 2   | 0.686368  | 0.125821 | 1605491   | 1606616   | 1607377   | 1608037  |
| 138 NA18502 | [2515685 chr4 | 4 | 4169644   | 4171588   | 1945   | 2   | 0.638016  | 0.12582  | 4169278   | 4170011   | 4170011   | 4173166  |
| 139 NA18502 | [2515685 chr4 | 4 | 8740725   | 8756949   | 16225  | 24  | 0.683303  | 0.03632  | 8740586   | 8740864   | 8756813   | 8757086  |
| 140 NA18502 | [2515685 chr4 | 4 | 8998176   | 9046719   | 48544  | 87  | 0.99508   | 0.01913  | 8850774   | 9001243   | 9046129   | 9047305  |
| 141 NA18502 | [2515685 chr4 | 4 | 9052312   | 9082725   | 30414  | 49  | 0.252879  | 0.02542  | 9051799   | 9052826   | 9082367   | 9083084  |
| 142 NA18502 | [2515685 chr4 | 4 | 9209486   | 9212045   | 2560   | 4   | 0.496848  | 0.088969 | 9209141   | 9209832   | 9211875   | 9212215  |
| 143 NA18502 | [2515685 chr4 | 4 | 9812346   | 9813108   | 763    | 33  | 2.230831  | 0.030974 | 9812284   | 9812408   | 9812952   | 9813265  |
| 144 NA18502 | [2515685 chr4 | 4 | 9887220   | 9910115   | 22896  | 29  | 1.567651  | 0.043797 | 9886886   | 9887555   | 9909843   | 9910388  |
| 145 NA18502 | [2515685 chr4 | 4 | 15436109  | 15447669  | 11561  | 4   | -0.835574 | 0.089733 | 15435485  | 15436734  | 15446602  | 15494471 |
| 146 NA18502 | [2515685 chr4 | 4 | 21045633  | 21053532  | 7900   | 8   | -0.783759 | 0.067294 | 21045231  | 21046035  | 21053115  | 21053956 |
| 147 NA18502 | [2515685 chr4 | 4 | 29962383  | 29967902  | 5520   | 7   | -0.414425 | 0.068348 | 29962071  | 29962695  | 29967344  | 29968467 |
| 148 NA18502 | [2515685 chr4 | 4 | 34261857  | 34275115  | 13259  | 17  | -0.318856 | 0.046674 | 34261316  | 34262398  | 34274632  | 34275591 |
| 149 NA18502 | [2515685 chr4 | 4 | 34308934  | 34314599  | 5666   | 2   | -0.79207  | 0.139233 | 34306679  | 34311190  | 34313107  | 34316091 |
| 150 NA18502 | [2515685 chr4 | 4 | 34602797  | 34650994  | 48198  | 45  | 0.615008  | 0.027948 | 34601994  | 34603600  | 34649535  | 34652457 |
| 151 NA18502 | [2515685 chr4 | 4 | 42543239  | 42546856  | 3618   | 2   | 0.733335  | 0.125821 | 42538590  | 42546306  | 42546636  | 42547071 |
| 152 NA18502 | [2515685 chr4 | 4 | 49080370  | 49114485  | 34116  | 80  | -0.324953 | 0.019893 | 49079937  | 49080803  | 49114372  | 49114591 |
| 153 NA18502 | [2515685 chr4 | 4 | 49365066  | 49401035  | 35970  | 76  | -0.321664 | 0.020411 | 49363387  | 49366746  | 49400687  | 49401387 |
| 154 NA18502 | [2515685 chr4 | 4 | 58444678  | 58466813  | 22136  | 19  | -0.262903 | 0.042099 | 58444389  | 58444967  | 58466403  | 58467227 |
| 155 NA18502 | [2515685 chr4 | 4 | 63500373  | 63504889  | 4517   | 5   | -0.825981 | 0.100192 | 63494261  | 63503440  | 63504639  | 63505146 |
| 156 NA18502 | [2515685 chr4 | 4 | 68588077  | 68598964  | 10888  | 4   | -0.494969 | 0.090327 | 68586837  | 68589318  | 68595897  | 68603311 |
| 157 NA18502 | [2515685 chr4 | 4 | 69201446  | 69320563  | 119118 | 72  | 0.895222  | 0.025967 | 69200937  | 69201955  | 69320240  | 69320887 |
| 158 NA18502 | [2515685 chr4 | 4 | 92289329  | 92292975  | 3647   | 2   | 0.713401  | 0.125821 | 92199954  | 92292396  | 92292781  | 92293171 |
| 159 NA18502 | [2515685 chr4 | 4 | 104177115 | 104229081 | 51967  | 42  | -0.281754 | 0.027493 | 104176781 | 104177450 | 104228777 | 10422938 |
| 160 NA18502 | [2515685 chr4 | 4 | 104798397 | 104817565 | 19169  | 15  | -0.280701 | 0.04682  | 104796578 | 104800217 | 104814498 | 10482354 |
| 161 NA18502 | [2515685 chr4 | 4 | 119480819 | 119487782 | 6964   | 5   | -0.869958 | 0.080635 | 119473487 | 119483886 | 119487418 | 11948814 |
| 162 NA18502 | [2515685 chr4 | 4 | 132479128 | 132481065 | 1938   | 32  | -0.308527 | 0.031455 | 132478081 | 132480175 | 132480937 | 13248119 |
| 163 NA18502 | [2515685 chr4 | 4 | 133536191 | 133540723 | 4533   | 3   | -1.497736 | 0.144302 | 133531398 | 133539258 | 133540462 | 13354098 |
| 164 NA18502 | [2515685 chr4 | 4 | 138449561 | 138458454 | 8894   | 8   | -0.914111 | 0.066781 | 138448993 | 138450130 | 138458291 | 13845861 |
| 165 NA18502 | [2515685 chr4 | 4 | 138537751 | 138549906 | 12156  | 14  | 0.689867  | 0.053695 | 138537443 | 138538059 | 138547414 | 13855239 |
| 166 NA18502 | [2515685 chr4 | 4 | 142588136 | 142590500 | 2365   | 4   | -1.358015 | 0.103568 | 142587774 | 142588498 | 142590303 | 14259069 |
| 167 NA18502 | [2515685 chr4 | 4 | 152236496 | 152243015 | 6520   | 8   | -0.831275 | 0.065846 | 152231776 | 152239563 | 152241354 | 15224467 |
| 168 NA18502 | [2515685 chr4 | 4 | 162237272 | 162242562 | 5291   | 8   | 0.751173  | 0.066649 | 162236487 | 162238058 | 162242381 | 16224274 |
| 169 NA18502 | [2515685 chr4 | 4 | 162806038 | 162809269 | 3232   | 3   | 0.687823  | 0.102732 | 162804872 | 162807204 | 162808734 | 16280980 |
| 170 NA18502 | [2515685 chr4 | 4 | 166219429 | 166243906 | 24478  | 19  | 0.414191  | 0.040984 | 166219070 | 166219788 | 166243659 | 16624415 |
| 171 NA18502 | [2515685 chr4 | 4 | 169183401 | 169368370 | 184970 | 162 | 0.650356  | 0.014604 | 169182712 | 169184090 | 169366713 | 16937002 |
| 172 NA18502 | [2515685 chr4 | 4 | 173363594 | 173367718 | 4125   | 6   | -2.117729 | 0.091123 | 173362583 | 173364606 | 173367283 | 17336815 |
| 173 NA18502 | [2515685 chr4 | 4 | 173799832 | 173807322 | 7491   | 6   | -2.157888 | 0.12586  | 173799464 | 173800201 | 173804255 | 17381134 |
| 174 NA18502 | [2515685 chr4 | 4 | 185533276 | 185544849 | 11574  | 12  | 0.785265  | 0.052289 | 185532696 | 185533857 | 185543276 | 18554642 |
| 175 NA18502 | [2515685 chr4 | 4 | 186816951 | 186819359 | 2409   | 3   | 3.189195  | 0.179713 | 186816420 | 186817483 | 186819049 | 18681967 |
| 176 NA18502 | [2515685 chr4 | 4 | 187728494 | 187732907 | 4414   | 15  | 0.580039  | 0.045943 | 187728193 | 187728795 | 187732541 | 18773327 |
| 177 NA18502 | [2515685 chr4 | 4 | 188255523 | 188269680 | 14158  | 235 | 1.708583  | 0.012294 | 188255215 | 188255831 | 188269403 | 18826995 |
| 178 NA18502 | [2515685 chr4 | 4 | 189801673 | 189806541 | 4869   | 7   | -0.376002 | 0.067254 | 189801381 | 189801966 | 189806018 | 18980706 |
| 179 NA18502 | [2515685 chr4 | 4 | 190528602 | 190533163 | 4562   | 21  | -0.691532 | 0.038829 | 190528058 | 190529146 | 190531664 | 19053466 |
| 180 NA18502 | [2515685 chr4 | 4 | 191142404 | 191143596 | 1193   | 3   | 0.951798  | 0.102732 | 191142135 | 191142673 | 191143215 | 19114397 |
| 181 NA18502 | [2515685 chr4 | 4 | 191360676 | 191387777 | 27102  | 8   | -0.42354  | 0.06291  | 191359713 | 191361640 | 191384710 | 19139251 |
| 182 NA18502 | [2515685 chr5 | 5 | 127921    | 130088    | 2168   | 3   | -0.69326  | 0.102732 | 127697    | 128146    | 129559    | 130617   |
| 183 NA18502 | [2515685 chr5 | 5 | 153687    | 155672    | 1986   | 3   | 0.611516  | 0.102732 | 153444    | 153930    | 155274    | 156071   |
| 184 NA18502 | [2515685 chr5 | 5 | 261631    | 263283    | 1653   | 9   | 0.679635  | 0.059312 | 261032    | 262230    | 262766    | 263801   |
| 185 NA18502 | [2515685 chr5 | 5 | 810517    | 819444    | 8928   | 11  | -0.339854 | 0.053729 | 809997    | 811038    | 819065    | 819824   |
| 186 NA18502 | [2515685 chr5 | 5 | 841163    | 890899    | 49737  | 35  | -0.357633 | 0.03055  | 840620    | 841706    | 890560    | 891235   |
| 187 NA18502 | [2515685 chr5 | 5 | 1087294   | 1092032   | 4739   | 6   | 0.37075   | 0.072643 | 1086836   | 1087753   | 1091754   | 1092316  |

|             |               |   |           |           |        |     |           |          |           |           |           |           |
|-------------|---------------|---|-----------|-----------|--------|-----|-----------|----------|-----------|-----------|-----------|-----------|
| 188 NA18502 | [2515685 chr5 | 5 | 1122995   | 1130295   | 7301   | 44  | 0.587405  | 0.026824 | 1122772   | 1123219   | 1130032   | 1130555   |
| 189 NA18502 | [2515685 chr5 | 5 | 1231558   | 1233247   | 1690   | 2   | -0.670883 | 0.125821 | 1231167   | 1231949   | 1232879   | 1233611   |
| 190 NA18502 | [2515685 chr5 | 5 | 13031439  | 13033620  | 2182   | 2   | -0.741339 | 0.128827 | 13030807  | 13032072  | 13033070  | 13034171  |
| 191 NA18502 | [2515685 chr5 | 5 | 21646885  | 21651681  | 4797   | 3   | -0.581911 | 0.105062 | 21646672  | 21647099  | 21650550  | 21652811  |
| 192 NA18502 | [2515685 chr5 | 5 | 57359558  | 57369858  | 10301  | 9   | 1.633817  | 0.074438 | 57359213  | 57359904  | 573567789 | 57371921  |
| 193 NA18502 | [2515685 chr5 | 5 | 68865200  | 68948510  | 83311  | 153 | 0.448009  | 0.014559 | 68864770  | 68865630  | 68948219  | 68948801  |
| 194 NA18502 | [2515685 chr5 | 5 | 69056324  | 69162094  | 105771 | 247 | 0.316836  | 0.011328 | 69056139  | 69056510  | 69161909  | 69162271  |
| 195 NA18502 | [2515685 chr5 | 5 | 69355513  | 69459890  | 104378 | 115 | 0.271584  | 0.016676 | 69355097  | 69355930  | 69459629  | 69460151  |
| 196 NA18502 | [2515685 chr5 | 5 | 69629933  | 69810999  | 181067 | 370 | 0.304056  | 0.009283 | 69629635  | 69630232  | 69809958  | 69812041  |
| 197 NA18502 | [2515685 chr5 | 5 | 69921501  | 70043328  | 121828 | 270 | 0.289875  | 0.010829 | 69921379  | 69921623  | 70043029  | 70043621  |
| 198 NA18502 | [2515685 chr5 | 5 | 70269742  | 70341971  | 72230  | 89  | 0.302607  | 0.018921 | 70269294  | 70270191  | 70341537  | 70342401  |
| 199 NA18502 | [2515685 chr5 | 5 | 70346521  | 70431922  | 85402  | 140 | 0.458498  | 0.015163 | 70346074  | 70346969  | 70431095  | 70432741  |
| 200 NA18502 | [2515685 chr5 | 5 | 70635607  | 70688376  | 52770  | 113 | 0.312341  | 0.016739 | 70635422  | 70635793  | 70687859  | 70688891  |
| 201 NA18502 | [2515685 chr5 | 5 | 81459212  | 81466056  | 6845   | 2   | -1.41402  | 0.134409 | 81455614  | 81462405  | 81462863  | 81470281  |
| 202 NA18502 | [2515685 chr5 | 5 | 97465497  | 97467920  | 2424   | 5   | -0.421441 | 0.079576 | 97465358  | 97465637  | 97467539  | 97468301  |
| 203 NA18502 | [2515685 chr5 | 5 | 99414935  | 99420285  | 5351   | 7   | -0.400508 | 0.067254 | 99414604  | 99415267  | 99419746  | 99420821  |
| 204 NA18502 | [2515685 chr5 | 5 | 99544011  | 99548396  | 4386   | 2   | -0.766385 | 0.125821 | 99538916  | 99547204  | 99547960  | 99548831  |
| 205 NA18502 | [2515685 chr5 | 5 | 101198865 | 101235374 | 36510  | 37  | -0.80979  | 0.030884 | 101192106 | 101202058 | 101235238 | 10123551  |
| 206 NA18502 | [2515685 chr5 | 5 | 137833866 | 137844134 | 10269  | 10  | 0.456765  | 0.058331 | 137833594 | 137834139 | 137843310 | 137844951 |
| 207 NA18502 | [2515685 chr5 | 5 | 140203081 | 140217091 | 14011  | 18  | 1.609306  | 0.058916 | 140202344 | 140203819 | 140216552 | 140217631 |
| 208 NA18502 | [2515685 chr5 | 5 | 150157909 | 150161161 | 3253   | 5   | -0.671199 | 0.083374 | 150157286 | 150158532 | 150160702 | 150161621 |
| 209 NA18502 | [2515685 chr5 | 5 | 150183322 | 150194691 | 11370  | 2   | -1.115644 | 0.125821 | 150181427 | 150185218 | 150191652 | 150197731 |
| 210 NA18502 | [2515685 chr5 | 5 | 150199135 | 150203144 | 4010   | 6   | -1.907913 | 0.09434  | 150198882 | 150199389 | 150202838 | 150203451 |
| 211 NA18502 | [2515685 chr5 | 5 | 155408303 | 155414027 | 5725   | 2   | -0.852002 | 0.161796 | 155405622 | 155410984 | 155413760 | 155414291 |
| 212 NA18502 | [2515685 chr5 | 5 | 155414027 | 155424012 | 9986   | 9   | -2.980206 | 0.099573 | 155413760 | 155414294 | 155420819 | 155427611 |
| 213 NA18502 | [2515685 chr5 | 5 | 165157996 | 165161604 | 3609   | 2   | -1.437198 | 0.151886 | 165155280 | 165160712 | 165160802 | 165162401 |
| 214 NA18502 | [2515685 chr5 | 5 | 175298750 | 175314575 | 15826  | 18  | 0.270657  | 0.04194  | 175298491 | 175299009 | 175314240 | 175314911 |
| 215 NA18502 | [2515685 chr5 | 5 | 175546638 | 175559042 | 12405  | 16  | 0.257869  | 0.044484 | 175546435 | 175546842 | 175558597 | 175559481 |
| 216 NA18502 | [2515685 chr5 | 5 | 180306298 | 180363417 | 57120  | 58  | 0.55762   | 0.023847 | 180305337 | 180307260 | 180363120 | 180363711 |
| 217 NA18502 | [2515685 chr6 | 6 | 201167    | 327656    | 126490 | 130 | 0.285857  | 0.015655 | 200920    | 201415    | 326993    | 328320    |
| 218 NA18502 | [2515685 chr6 | 6 | 26827230  | 26890851  | 63622  | 151 | 0.382329  | 0.01448  | 26826983  | 26827477  | 26890604  | 26891091  |
| 219 NA18502 | [2515685 chr6 | 6 | 27062573  | 27078178  | 15606  | 22  | 0.263395  | 0.037936 | 27062553  | 27062593  | 27077814  | 27078541  |
| 220 NA18502 | [2515685 chr6 | 6 | 30759878  | 30763127  | 3250   | 4   | 0.454961  | 0.088969 | 30759678  | 30760078  | 30762846  | 30763401  |
| 221 NA18502 | [2515685 chr6 | 6 | 31158178  | 31160444  | 2267   | 3   | 0.546075  | 0.102732 | 31157997  | 31158360  | 31160125  | 31160761  |
| 222 NA18502 | [2515685 chr6 | 6 | 31336812  | 31342350  | 5539   | 3   | 0.730473  | 0.102732 | 31329273  | 31340316  | 31342051  | 31342641  |
| 223 NA18502 | [2515685 chr6 | 6 | 31383567  | 31386100  | 2534   | 3   | -0.82614  | 0.109882 | 31383185  | 31383949  | 31385806  | 31386391  |
| 224 NA18502 | [2515685 chr6 | 6 | 32056378  | 32120072  | 63695  | 77  | 0.373499  | 0.020278 | 32056113  | 32056644  | 32119839  | 32120301  |
| 225 NA18502 | [2515685 chr6 | 6 | 32557802  | 32558865  | 1064   | 2   | 0.895602  | 0.125821 | 32557647  | 32557958  | 32558698  | 32559031  |
| 226 NA18502 | [2515685 chr6 | 6 | 32564602  | 32591649  | 27048  | 10  | -0.715763 | 0.071383 | 32564316  | 32564888  | 32591403  | 32591891  |
| 227 NA18502 | [2515685 chr6 | 6 | 32591649  | 32593630  | 1982   | 2   | 1.011712  | 0.134364 | 32591403  | 32591896  | 32593179  | 32594081  |
| 228 NA18502 | [2515685 chr6 | 6 | 32721259  | 32732004  | 10746  | 5   | 0.78188   | 0.084518 | 32720619  | 32721900  | 32731216  | 32732791  |
| 229 NA18502 | [2515685 chr6 | 6 | 32741849  | 32744343  | 2495   | 4   | 0.968486  | 0.092243 | 32741631  | 32742067  | 32744136  | 32744551  |
| 230 NA18502 | [2515685 chr6 | 6 | 32799932  | 32801270  | 1339   | 2   | 1.150296  | 0.131103 | 32799289  | 32800576  | 32800912  | 32801621  |
| 231 NA18502 | [2515685 chr6 | 6 | 35800432  | 35809442  | 9011   | 15  | 0.250029  | 0.045943 | 35799999  | 35800866  | 35808995  | 35809881  |
| 232 NA18502 | [2515685 chr6 | 6 | 35852492  | 35874426  | 21935  | 21  | 0.399031  | 0.038829 | 35852168  | 35852817  | 35873957  | 35874891  |
| 233 NA18502 | [2515685 chr6 | 6 | 47525084  | 47526825  | 1742   | 2   | -0.633307 | 0.125821 | 47524623  | 47525546  | 47526415  | 47527231  |
| 234 NA18502 | [2515685 chr6 | 6 | 54036900  | 54042384  | 5485   | 5   | 3.267338  | 0.139067 | 54036573  | 54037227  | 54041771  | 54042991  |
| 235 NA18502 | [2515685 chr6 | 6 | 58249486  | 58259894  | 10409  | 16  | 0.326879  | 0.044484 | 58249202  | 58249771  | 58259482  | 58260301  |
| 236 NA18502 | [2515685 chr6 | 6 | 58329133  | 58342694  | 13562  | 16  | -0.252973 | 0.044496 | 58325965  | 58332302  | 58342661  | 58342721  |
| 237 NA18502 | [2515685 chr6 | 6 | 66967148  | 66968416  | 1269   | 2   | -0.69659  | 0.130443 | 66966949  | 66967347  | 66967832  | 66969001  |
| 238 NA18502 | [2515685 chr6 | 6 | 68343105  | 68362786  | 19682  | 13  | -0.32413  | 0.052312 | 68342940  | 68343271  | 68362554  | 68363011  |
| 239 NA18502 | [2515685 chr6 | 6 | 75036507  | 75042543  | 6037   | 6   | -0.410144 | 0.077768 | 75036237  | 75036777  | 75042278  | 75042801  |
| 240 NA18502 | [2515685 chr6 | 6 | 77495034  | 77513515  | 18482  | 12  | 0.644824  | 0.054885 | 77493568  | 77496500  | 77510011  | 77517691  |
| 241 NA18502 | [2515685 chr6 | 6 | 79023318  | 79093263  | 69946  | 69  | 0.700329  | 0.0222   | 79022028  | 79024609  | 79091909  | 79094611  |
| 242 NA18502 | [2515685 chr6 | 6 | 93631413  | 93637196  | 5784   | 6   | -0.888757 | 0.078197 | 93630862  | 93631964  | 93635493  | 93638891  |

|             |               |   |           |           |        |     |           |          |           |           |           |           |
|-------------|---------------|---|-----------|-----------|--------|-----|-----------|----------|-----------|-----------|-----------|-----------|
| 243 NA18502 | [2515685 chr6 | 6 | 102041093 | 102046055 | 4963   | 6   | -0.815406 | 0.076921 | 102040642 | 102041544 | 102045198 | 10204691. |
| 244 NA18502 | [2515685 chr6 | 6 | 103844099 | 103855469 | 11371  | 5   | 0.89791   | 0.084521 | 103843851 | 103844347 | 103854996 | 10385594. |
| 245 NA18502 | [2515685 chr6 | 6 | 103855469 | 103871201 | 15733  | 10  | 3.057889  | 0.120067 | 103854996 | 103855942 | 103868241 | 10387416. |
| 246 NA18502 | [2515685 chr6 | 6 | 115637660 | 115676977 | 39318  | 18  | -0.260633 | 0.042734 | 115637304 | 115638016 | 115673473 | 11568831. |
| 247 NA18502 | [2515685 chr6 | 6 | 160056728 | 160058998 | 2271   | 2   | -0.734322 | 0.125821 | 160055808 | 160057648 | 160058322 | 16005967. |
| 248 NA18502 | [2515685 chr6 | 6 | 167479669 | 167482583 | 2915   | 2   | 0.639396  | 0.125821 | 167479005 | 167480333 | 167482187 | 16748297. |
| 249 NA18502 | [2515685 chr6 | 6 | 167768770 | 167776315 | 7546   | 16  | 0.387361  | 0.044484 | 167768683 | 167768857 | 167776063 | 16777656. |
| 250 NA18502 | [2515685 chr6 | 6 | 168453011 | 168456762 | 3752   | 3   | 1.086932  | 0.102931 | 168452611 | 168453411 | 168456200 | 16845732. |
| 251 NA18502 | [2515685 chr6 | 6 | 168535543 | 168537360 | 1818   | 12  | 0.31557   | 0.051366 | 168535263 | 168535824 | 168537100 | 16853762. |
| 252 NA18502 | [2515685 chr6 | 6 | 168780035 | 168781989 | 1955   | 4   | -0.565256 | 0.088969 | 168779504 | 168780567 | 168781555 | 16878242. |
| 253 NA18502 | [2515685 chr6 | 6 | 169340173 | 169347270 | 7098   | 30  | 0.921948  | 0.032486 | 169335703 | 169343677 | 169347209 | 16934733. |
| 254 NA18502 | [2515685 chr6 | 6 | 170603879 | 170604666 | 788    | 2   | -1.261136 | 0.125821 | 170603541 | 170604217 | 170604339 | 17060499. |
| 255 NA18502 | [2515685 chr6 | 6 | 170625506 | 170627028 | 1523   | 3   | 1.256251  | 0.105991 | 170625015 | 170625997 | 170626579 | 17062747. |
| 256 NA18502 | [2515685 chr6 | 6 | 170689560 | 170694780 | 5221   | 18  | 0.401831  | 0.04194  | 170689182 | 170689938 | 170694493 | 17069506. |
| 257 NA18502 | [2515685 chr6 | 6 | 170721483 | 170724403 | 2921   | 12  | 0.259724  | 0.051366 | 170721218 | 170721749 | 170724050 | 17072475. |
| 258 NA18502 | [2515685 chr7 | 7 | 164196    | 173580    | 9385   | 13  | 0.392612  | 0.049403 | 163674    | 164718    | 173280    | 17388C    |
| 259 NA18502 | [2515685 chr7 | 7 | 1084125   | 1088166   | 4042   | 16  | 0.520856  | 0.044484 | 1083752   | 1084499   | 1087449   | 108888:   |
| 260 NA18502 | [2515685 chr7 | 7 | 3384111   | 3392459   | 8349   | 8   | 0.83346   | 0.06291  | 3383451   | 3384772   | 3390107   | 339561:   |
| 261 NA18502 | [2515685 chr7 | 7 | 7001613   | 7003286   | 1674   | 2   | -0.688772 | 0.132517 | 7001344   | 7001882   | 7002871   | 700370:   |
| 262 NA18502 | [2515685 chr7 | 7 | 12877255  | 12898439  | 21185  | 18  | -0.819363 | 0.043606 | 12876061  | 12878449  | 12896087  | 1290487:  |
| 263 NA18502 | [2515685 chr7 | 7 | 13986358  | 13998356  | 11999  | 13  | -0.326209 | 0.051798 | 13986046  | 13986671  | 13996004  | 1400394:  |
| 264 NA18502 | [2515685 chr7 | 7 | 14861623  | 14866192  | 4570   | 3   | -1.134028 | 0.105177 | 14860212  | 14863034  | 14864375  | 1486800:  |
| 265 NA18502 | [2515685 chr7 | 7 | 24073201  | 24087986  | 14786  | 16  | -0.772425 | 0.045069 | 24071705  | 24074697  | 24085634  | 2409266:  |
| 266 NA18502 | [2515685 chr7 | 7 | 38159778  | 38178711  | 18934  | 20  | -0.629868 | 0.039879 | 38159476  | 38160081  | 38177987  | 3817943:  |
| 267 NA18502 | [2515685 chr7 | 7 | 43770898  | 43943926  | 173029 | 114 | 0.295899  | 0.016676 | 43768995  | 43772802  | 43941574  | 4402006:  |
| 268 NA18502 | [2515685 chr7 | 7 | 53096159  | 53101045  | 4887   | 2   | -0.967496 | 0.135597 | 53094883  | 53097435  | 53100515  | 5310157:  |
| 269 NA18502 | [2515685 chr7 | 7 | 53229798  | 53237272  | 7475   | 8   | -0.900136 | 0.07307  | 53229357  | 53230239  | 53235543  | 5323900:  |
| 270 NA18502 | [2515685 chr7 | 7 | 56652639  | 56668797  | 16159  | 12  | 0.391059  | 0.051366 | 56652228  | 56653051  | 56668252  | 5666934:  |
| 271 NA18502 | [2515685 chr7 | 7 | 57637083  | 57648467  | 11385  | 7   | 0.39462   | 0.067254 | 57634979  | 57639188  | 57647779  | 5764915:  |
| 272 NA18502 | [2515685 chr7 | 7 | 57661036  | 57667912  | 6877   | 8   | -0.322271 | 0.063272 | 57661027  | 57661045  | 57667668  | 5766815:  |
| 273 NA18502 | [2515685 chr7 | 7 | 57688392  | 57693448  | 5057   | 3   | 0.591896  | 0.102732 | 57688181  | 57688603  | 57693264  | 5769363:  |
| 274 NA18502 | [2515685 chr7 | 7 | 62044122  | 62068217  | 24096  | 16  | -0.25442  | 0.049857 | 62043836  | 62044408  | 62068132  | 6206830:  |
| 275 NA18502 | [2515685 chr7 | 7 | 62124270  | 62127972  | 3703   | 12  | -0.401853 | 0.051709 | 62124190  | 62124350  | 62127882  | 6212806:  |
| 276 NA18502 | [2515685 chr7 | 7 | 62406139  | 62411218  | 5080   | 15  | -0.253444 | 0.045943 | 62405473  | 62406806  | 62411133  | 6241130:  |
| 277 NA18502 | [2515685 chr7 | 7 | 62423752  | 62430522  | 6771   | 18  | -0.388784 | 0.042182 | 62423322  | 62424183  | 62429779  | 6243126:  |
| 278 NA18502 | [2515685 chr7 | 7 | 62654114  | 62670115  | 16002  | 8   | 0.359775  | 0.06291  | 62653036  | 62655193  | 62667763  | 6267326:  |
| 279 NA18502 | [2515685 chr7 | 7 | 63997159  | 64008697  | 11539  | 14  | 0.410315  | 0.047701 | 63996513  | 63997805  | 64008352  | 6400904:  |
| 280 NA18502 | [2515685 chr7 | 7 | 64033071  | 64045487  | 12417  | 36  | -0.346273 | 0.029656 | 64032865  | 64033278  | 64045069  | 6404590:  |
| 281 NA18502 | [2515685 chr7 | 7 | 64464087  | 64467636  | 3550   | 11  | -0.461147 | 0.05365  | 64463669  | 64464506  | 64467463  | 6446781:  |
| 282 NA18502 | [2515685 chr7 | 7 | 64544321  | 64556662  | 12342  | 35  | -0.347793 | 0.030077 | 64544040  | 64544602  | 64556244  | 6455708:  |
| 283 NA18502 | [2515685 chr7 | 7 | 64691204  | 64725545  | 34342  | 38  | 0.423267  | 0.029131 | 64690582  | 64691826  | 64725209  | 6472588:  |
| 284 NA18502 | [2515685 chr7 | 7 | 69866390  | 69869623  | 3234   | 4   | 0.650116  | 0.088969 | 69865412  | 69867368  | 69869269  | 6986997:  |
| 285 NA18502 | [2515685 chr7 | 7 | 69869623  | 69871056  | 1434   | 2   | 2.611825  | 0.15122  | 69869269  | 69869978  | 69870420  | 6987169:  |
| 286 NA18502 | [2515685 chr7 | 7 | 71928141  | 71974706  | 46566  | 114 | 0.28508   | 0.016665 | 71927988  | 71928295  | 71974359  | 7197505:  |
| 287 NA18502 | [2515685 chr7 | 7 | 73760086  | 73777199  | 17114  | 36  | 0.308097  | 0.029656 | 73759392  | 73760781  | 73777083  | 7377731:  |
| 288 NA18502 | [2515685 chr7 | 7 | 74144095  | 74147990  | 3896   | 14  | 0.431979  | 0.047556 | 74143947  | 74144243  | 74147735  | 7414824:  |
| 289 NA18502 | [2515685 chr7 | 7 | 74551479  | 74619145  | 67667  | 179 | 0.289721  | 0.0133   | 74551132  | 74551827  | 74618993  | 7461929:  |
| 290 NA18502 | [2515685 chr7 | 7 | 74771799  | 74783402  | 11604  | 22  | 0.287722  | 0.037936 | 74771630  | 74771968  | 74782714  | 7478409:  |
| 291 NA18502 | [2515685 chr7 | 7 | 75852950  | 75860448  | 7499   | 10  | -0.558282 | 0.058132 | 75852510  | 75853390  | 75859401  | 7586149:  |
| 292 NA18502 | [2515685 chr7 | 7 | 76298730  | 76301152  | 2423   | 8   | 0.468364  | 0.06291  | 76298561  | 76298899  | 76301004  | 7630130:  |
| 293 NA18502 | [2515685 chr7 | 7 | 89455106  | 89456632  | 1527   | 3   | 2.189331  | 0.131809 | 89454839  | 89455373  | 89456225  | 8945703:  |
| 294 NA18502 | [2515685 chr7 | 7 | 92972933  | 92976895  | 3963   | 2   | -2.533456 | 0.263493 | 92972732  | 92973135  | 92975569  | 9297822:  |
| 295 NA18502 | [2515685 chr7 | 7 | 97038345  | 97047344  | 9000   | 16  | -0.58717  | 0.048475 | 97032531  | 97040697  | 97046973  | 9704771:  |
| 296 NA18502 | [2515685 chr7 | 7 | 97201390  | 97203016  | 1627   | 5   | 0.606624  | 0.079576 | 97201229  | 97201551  | 97202739  | 9720329:  |
| 297 NA18502 | [2515685 chr7 | 7 | 101688536 | 101925433 | 236898 | 311 | 0.314345  | 0.010091 | 101684772 | 101690888 | 101924670 | 10192619. |

|             |               |   |           |           |        |      |           |          |           |           |           |          |
|-------------|---------------|---|-----------|-----------|--------|------|-----------|----------|-----------|-----------|-----------|----------|
| 298 NA18502 | [2515685 chr7 | 7 | 109034782 | 109048749 | 13968  | 10   | 1.822202  | 0.07455  | 109024063 | 109037134 | 109046953 | 10905054 |
| 299 NA18502 | [2515685 chr7 | 7 | 109776378 | 109782655 | 6278   | 5    | 0.636426  | 0.086265 | 109775821 | 109776936 | 109782301 | 10978301 |
| 300 NA18502 | [2515685 chr7 | 7 | 125639507 | 125644775 | 5269   | 6    | -0.782285 | 0.088117 | 125639054 | 125639961 | 125644046 | 12564550 |
| 301 NA18502 | [2515685 chr7 | 7 | 126114282 | 126121632 | 7351   | 10   | -0.386398 | 0.056791 | 126114248 | 126114317 | 126121278 | 12612198 |
| 302 NA18502 | [2515685 chr7 | 7 | 126369902 | 126375181 | 5280   | 6    | -0.733323 | 0.072763 | 126369503 | 126370302 | 126374771 | 12637559 |
| 303 NA18502 | [2515685 chr7 | 7 | 133241895 | 133257361 | 15467  | 15   | 1.477747  | 0.059997 | 133240782 | 133243008 | 133255009 | 13326093 |
| 304 NA18502 | [2515685 chr7 | 7 | 142733905 | 142863185 | 129281 | 170  | 0.33926   | 0.009404 | 142733678 | 142734133 | 142862808 | 14286356 |
| 305 NA18502 | [2515685 chr7 | 7 | 142892530 | 143009302 | 116773 | 161  | 0.33926   | 0.009404 | 142892450 | 142892611 | 143009099 | 14300950 |
| 306 NA18502 | [2515685 chr7 | 7 | 143243024 | 143262184 | 19161  | 20   | -0.276467 | 0.04107  | 143242476 | 143243573 | 143261848 | 14326252 |
| 307 NA18502 | [2515685 chr7 | 7 | 143346673 | 143348067 | 1395   | 5    | -0.893127 | 0.079576 | 143346643 | 143346704 | 143347806 | 14334832 |
| 308 NA18502 | [2515685 chr7 | 7 | 143472403 | 143473797 | 1395   | 5    | -0.893127 | 0.079576 | 143472142 | 143472664 | 143473766 | 14347382 |
| 309 NA18502 | [2515685 chr7 | 7 | 152967238 | 152968286 | 1049   | 2    | -1.01629  | 0.125817 | 152966998 | 152967478 | 152968034 | 15296853 |
| 310 NA18502 | [2515685 chr7 | 7 | 157098304 | 157114331 | 16028  | 13   | 0.2508    | 0.049351 | 157097757 | 157098851 | 157112943 | 15711572 |
| 311 NA18502 | [2515685 chr7 | 7 | 158617060 | 158624380 | 7321   | 6    | 0.684998  | 0.077067 | 158616763 | 158617357 | 158622028 | 15862673 |
| 312 NA18502 | [2515685 chr8 | 8 | 1328256   | 1343509   | 15254  | 45   | -0.31073  | 0.026788 | 1327688   | 1328824   | 1342795   | 1344224  |
| 313 NA18502 | [2515685 chr8 | 8 | 2109102   | 2122807   | 13706  | 17   | -0.407253 | 0.043797 | 2108407   | 2109798   | 2122309   | 2123306  |
| 314 NA18502 | [2515685 chr8 | 8 | 2238732   | 2253795   | 15064  | 10   | -0.771334 | 0.057314 | 2233839   | 2241488   | 2251039   | 2257526  |
| 315 NA18502 | [2515685 chr8 | 8 | 4110204   | 4112526   | 2323   | 2    | 2.282015  | 0.208967 | 4109692   | 4110717   | 4112031   | 4113022  |
| 316 NA18502 | [2515685 chr8 | 8 | 5582875   | 5594011   | 11137  | 9    | 0.718459  | 0.059312 | 5582615   | 5583135   | 5592820   | 5595203  |
| 317 NA18502 | [2515685 chr8 | 8 | 6067685   | 6068703   | 1019   | 2    | 0.726017  | 0.125821 | 6067426   | 6067944   | 6068359   | 6069048  |
| 318 NA18502 | [2515685 chr8 | 8 | 7061162   | 7075965   | 14804  | 24   | 0.404121  | 0.036321 | 7060897   | 7061427   | 7075687   | 7076244  |
| 319 NA18502 | [2515685 chr8 | 8 | 7097781   | 7929654   | 831874 | 1660 | 0.742528  | 0.004374 | 7097278   | 7098285   | 7929154   | 7930151  |
| 320 NA18502 | [2515685 chr8 | 8 | 7951432   | 7966244   | 14813  | 38   | 0.389845  | 0.028865 | 7951122   | 7951743   | 7965980   | 7966501  |
| 321 NA18502 | [2515685 chr8 | 8 | 11985531  | 12072887  | 87357  | 175  | 0.403539  | 0.006969 | 11982232  | 11988287  | 12072623  | 1207315  |
| 322 NA18502 | [2515685 chr8 | 8 | 12241637  | 12511340  | 269704 | 393  | 0.403539  | 0.006969 | 12241497  | 12241777  | 12510798  | 1251188  |
| 323 NA18502 | [2515685 chr8 | 8 | 12552893  | 12570846  | 17954  | 39   | 0.295832  | 0.028493 | 12552641  | 12553145  | 12570636  | 12571051 |
| 324 NA18502 | [2515685 chr8 | 8 | 13659264  | 13695343  | 36080  | 30   | -0.799635 | 0.034844 | 13658432  | 13660096  | 13694817  | 1369586  |
| 325 NA18502 | [2515685 chr8 | 8 | 16245461  | 16251509  | 6049   | 6    | -0.830422 | 0.074089 | 16245129  | 16245794  | 16250812  | 1625220  |
| 326 NA18502 | [2515685 chr8 | 8 | 16305945  | 16317940  | 11996  | 13   | -0.915115 | 0.049963 | 16304897  | 16306994  | 16317726  | 1631815  |
| 327 NA18502 | [2515685 chr8 | 8 | 17434550  | 17435923  | 1374   | 2    | -0.723183 | 0.125821 | 17434174  | 17434927  | 17435599  | 1743624  |
| 328 NA18502 | [2515685 chr8 | 8 | 39481833  | 39482595  | 763    | 2    | -0.709971 | 0.1379   | 39481653  | 39482013  | 39482410  | 3948278  |
| 329 NA18502 | [2515685 chr8 | 8 | 51286841  | 51293091  | 6251   | 8    | -0.326111 | 0.06291  | 51286464  | 51287219  | 51292783  | 5129340  |
| 330 NA18502 | [2515685 chr8 | 8 | 52021936  | 52024227  | 2292   | 5    | -0.404327 | 0.079576 | 52021731  | 52022142  | 52023863  | 5202459  |
| 331 NA18502 | [2515685 chr8 | 8 | 58278355  | 58296106  | 17752  | 17   | 1.145391  | 0.044355 | 58277116  | 58279595  | 58295669  | 5829654  |
| 332 NA18502 | [2515685 chr8 | 8 | 72378534  | 72380286  | 1753   | 2    | -0.671805 | 0.125821 | 72377848  | 72379220  | 72379847  | 7238072  |
| 333 NA18502 | [2515685 chr8 | 8 | 85423649  | 85431920  | 8272   | 7    | 0.758002  | 0.067491 | 85423043  | 85424256  | 85431347  | 8543249  |
| 334 NA18502 | [2515685 chr8 | 8 | 86742169  | 86909771  | 167603 | 98   | 0.62222   | 0.017972 | 86741757  | 86742581  | 86909541  | 8691000  |
| 335 NA18502 | [2515685 chr8 | 8 | 119282257 | 119284945 | 2689   | 2    | 0.634     | 0.125821 | 119281718 | 119282797 | 119284165 | 11928572 |
| 336 NA18502 | [2515685 chr8 | 8 | 143481581 | 143483762 | 2182   | 3    | 0.592296  | 0.102732 | 143481293 | 143481870 | 143483293 | 14348423 |
| 337 NA18502 | [2515685 chr8 | 8 | 144782808 | 144785960 | 3153   | 2    | 0.791748  | 0.125821 | 144771440 | 144785564 | 144785821 | 14478609 |
| 338 NA18502 | [2515685 chr8 | 8 | 145263688 | 145273863 | 10176  | 15   | 0.344148  | 0.045943 | 145263460 | 145263916 | 145273672 | 14527405 |
| 339 NA18502 | [2515685 chr8 | 8 | 145369108 | 145417891 | 48784  | 20   | 0.323692  | 0.039788 | 145367622 | 145370594 | 145417700 | 14541808 |
| 340 NA18502 | [2515685 chr8 | 8 | 146196075 | 146201678 | 5604   | 12   | 0.274389  | 0.051366 | 146195920 | 146196231 | 146201474 | 14620188 |
| 341 NA18502 | [2515685 chr9 | 9 | 507988    | 516172    | 8185   | 8    | -0.993998 | 0.063302 | 507436    | 508540    | 515712    | 516633   |
| 342 NA18502 | [2515685 chr9 | 9 | 1238714   | 1252124   | 13411  | 15   | -0.257701 | 0.047019 | 1238354   | 1239074   | 1251900   | 1252348  |
| 343 NA18502 | [2515685 chr9 | 9 | 7422495   | 7439929   | 17435  | 16   | 0.429886  | 0.044844 | 7410218   | 7424858   | 7439403   | 7440456  |
| 344 NA18502 | [2515685 chr9 | 9 | 12461678  | 12474973  | 13296  | 11   | -0.337128 | 0.055869 | 12461413  | 12461944  | 12472610  | 1248084  |
| 345 NA18502 | [2515685 chr9 | 9 | 21820393  | 22028837  | 208445 | 3    | -0.600759 | 0.102732 | 21753810  | 21822756  | 22026474  | 2216620  |
| 346 NA18502 | [2515685 chr9 | 9 | 24487034  | 24489351  | 2318   | 3    | -0.683585 | 0.104221 | 24486510  | 24487558  | 24489018  | 2448968  |
| 347 NA18502 | [2515685 chr9 | 9 | 30914355  | 30920389  | 6035   | 8    | -0.399066 | 0.064342 | 30914002  | 30914708  | 30919765  | 3092101  |
| 348 NA18502 | [2515685 chr9 | 9 | 33688323  | 33690927  | 2605   | 3    | -0.576804 | 0.102732 | 33687588  | 33689059  | 33689747  | 3369210  |
| 349 NA18502 | [2515685 chr9 | 9 | 38396643  | 38489753  | 93111  | 6    | -0.379794 | 0.072643 | 38273615  | 38399006  | 38489488  | 3849001  |
| 350 NA18502 | [2515685 chr9 | 9 | 38849874  | 38864486  | 14613  | 17   | -0.294763 | 0.043867 | 38849774  | 38849975  | 38864433  | 3886453  |
| 351 NA18502 | [2515685 chr9 | 9 | 39141292  | 39196054  | 54763  | 95   | -0.255228 | 0.012006 | 39140975  | 39141609  | 39195530  | 3919657  |
| 352 NA18502 | [2515685 chr9 | 9 | 39201179  | 39258993  | 57815  | 114  | -0.255228 | 0.012006 | 39200878  | 39201481  | 39258547  | 3925944  |



|             |                |    |           |           |         |      |           |          |           |           |           |          |
|-------------|----------------|----|-----------|-----------|---------|------|-----------|----------|-----------|-----------|-----------|----------|
| 353 NA18502 | [2515685 chr9  | 9  | 39489226  | 39507377  | 18152   | 35   | -0.269111 | 0.014296 | 39489107  | 39489345  | 39506871  | 3950788: |
| 354 NA18502 | [2515685 chr9  | 9  | 39512437  | 39570292  | 57856   | 109  | -0.269111 | 0.014296 | 39512136  | 39512739  | 39569846  | 3957073: |
| 355 NA18502 | [2515685 chr9  | 9  | 39813768  | 39815652  | 1885    | 3    | -0.678782 | 0.102732 | 39813502  | 39814035  | 39814733  | 3981657: |
| 356 NA18502 | [2515685 chr9  | 9  | 40202783  | 40278863  | 76081   | 132  | -0.265866 | 0.010025 | 40146338  | 40205146  | 40278404  | 4027932: |
| 357 NA18502 | [2515685 chr9  | 9  | 40285326  | 40360534  | 75209   | 164  | -0.265866 | 0.010025 | 40285124  | 40285529  | 40360153  | 4036091: |
| 358 NA18502 | [2515685 chr9  | 9  | 41185977  | 41210753  | 24777   | 47   | 0.258679  | 0.025993 | 41185096  | 41186858  | 41210608  | 4121089: |
| 359 NA18502 | [2515685 chr9  | 9  | 41234952  | 41249563  | 14612   | 14   | -0.307691 | 0.048454 | 41234900  | 41235005  | 41249466  | 4124966: |
| 360 NA18502 | [2515685 chr9  | 9  | 41649237  | 41651122  | 1886    | 3    | -0.678782 | 0.102732 | 41648318  | 41650157  | 41650855  | 4165138: |
| 361 NA18502 | [2515685 chr9  | 9  | 42754727  | 42756705  | 1979    | 3    | -0.889288 | 0.102732 | 42754385  | 42755070  | 42755767  | 4275764: |
| 362 NA18502 | [2515685 chr9  | 9  | 42875403  | 42877381  | 1979    | 3    | -0.889288 | 0.102732 | 42875061  | 42875746  | 42876443  | 4287832: |
| 363 NA18502 | [2515685 chr9  | 9  | 43065211  | 43066832  | 1622    | 2    | -0.762021 | 0.128259 | 43064261  | 43066162  | 43066646  | 4306701: |
| 364 NA18502 | [2515685 chr9  | 9  | 43097020  | 43136691  | 39672   | 92   | -0.273976 | 0.011215 | 43096964  | 43097077  | 43136669  | 4313671: |
| 365 NA18502 | [2515685 chr9  | 9  | 43142584  | 43170873  | 28290   | 59   | -0.273976 | 0.011215 | 43142306  | 43142862  | 43170670  | 4317107: |
| 366 NA18502 | [2515685 chr9  | 9  | 43177346  | 43213436  | 36091   | 71   | -0.273976 | 0.011215 | 43176888  | 43177804  | 43213301  | 4321357: |
| 367 NA18502 | [2515685 chr9  | 9  | 44928853  | 44929710  | 858     | 2    | 0.709768  | 0.125821 | 44928333  | 44929374  | 44929446  | 4492997: |
| 368 NA18502 | [2515685 chr9  | 9  | 45462417  | 45493026  | 30610   | 9    | 0.305667  | 0.059312 | 45461850  | 45462985  | 45490663  | 4549826: |
| 369 NA18502 | [2515685 chr9  | 9  | 45591290  | 45624388  | 33099   | 11   | 0.279312  | 0.05365  | 45589224  | 45593357  | 45623972  | 4562480: |
| 370 NA18502 | [2515685 chr9  | 9  | 65998415  | 66023205  | 24791   | 52   | 0.261012  | 0.024708 | 65997534  | 65999296  | 66023060  | 6602335: |
| 371 NA18502 | [2515685 chr9  | 9  | 66047392  | 66062001  | 14610   | 15   | -0.285823 | 0.046752 | 66047340  | 66047445  | 66061902  | 6606210: |
| 372 NA18502 | [2515685 chr9  | 9  | 66762244  | 66822650  | 60407   | 10   | 0.296377  | 0.056269 | 66761966  | 66762523  | 66822089  | 6682321: |
| 373 NA18502 | [2515685 chr9  | 9  | 87493134  | 87494470  | 1337    | 2    | 0.685237  | 0.125821 | 87492897  | 87493372  | 87493826  | 8749511: |
| 374 NA18502 | [2515685 chr9  | 9  | 112902065 | 112931264 | 29200   | 41   | -0.428902 | 0.027792 | 112901557 | 112902574 | 112930907 | 11293162 |
| 375 NA18502 | [2515685 chr9  | 9  | 126059422 | 126076365 | 16944   | 19   | 0.265181  | 0.040822 | 126059121 | 126059724 | 126076086 | 12607664 |
| 376 NA18502 | [2515685 chr9  | 9  | 126599475 | 126601911 | 2437    | 3    | 0.544462  | 0.102732 | 126598552 | 126600399 | 126600685 | 12660313 |
| 377 NA18502 | [2515685 chr9  | 9  | 137473657 | 137491807 | 18151   | 23   | 0.293458  | 0.037431 | 137473537 | 137473778 | 137491201 | 13749241 |
| 378 NA18502 | [2515685 chr9  | 9  | 138282658 | 138293128 | 10471   | 18   | 0.295991  | 0.041195 | 138282272 | 138283045 | 138292877 | 13829338 |
| 379 NA18502 | [2515685 chr9  | 9  | 138324677 | 138387055 | 62379   | 59   | 0.304629  | 0.023181 | 138324125 | 138325229 | 138386897 | 13838721 |
| 380 NA18502 | [2515685 chr10 | 10 | 6693908   | 6705054   | 11147   | 9    | 0.637935  | 0.06151  | 6692231   | 6695585   | 6704634   | 6705474  |
| 381 NA18502 | [2515685 chr10 | 10 | 20036833  | 20038315  | 1483    | 2    | -0.688123 | 0.125821 | 20036464  | 20037202  | 20038007  | 2003862  |
| 382 NA18502 | [2515685 chr10 | 10 | 20852812  | 20856434  | 3623    | 2    | -0.667081 | 0.128681 | 20852639  | 20852986  | 20853688  | 2086086  |
| 383 NA18502 | [2515685 chr10 | 10 | 38971268  | 39018739  | 47472   | 48   | -0.276318 | 0.025689 | 38971109  | 38971427  | 39018645  | 3901883: |
| 384 NA18502 | [2515685 chr10 | 10 | 42061216  | 42095168  | 33953   | 31   | -0.307885 | 0.032102 | 42059439  | 42062994  | 42095037  | 4209530: |
| 385 NA18502 | [2515685 chr10 | 10 | 42367060  | 42372028  | 4969    | 11   | 0.310435  | 0.05365  | 42366820  | 42367300  | 42371754  | 4237230: |
| 386 NA18502 | [2515685 chr10 | 10 | 42558098  | 42565662  | 7565    | 12   | -0.314484 | 0.052755 | 42557914  | 42558283  | 42565423  | 4256590  |
| 387 NA18502 | [2515685 chr10 | 10 | 45494180  | 45517699  | 23520   | 61   | -0.258073 | 0.022783 | 45494173  | 45494187  | 45517390  | 4551800: |
| 388 NA18502 | [2515685 chr10 | 10 | 46101913  | 46194276  | 92364   | 228  | -0.261383 | 0.003568 | 46101691  | 46102135  | 46194254  | 4619429: |
| 389 NA18502 | [2515685 chr10 | 10 | 46196750  | 47859332  | 1662583 | 2259 | -0.261383 | 0.003568 | 46196419  | 46197082  | 47859043  | 4785962: |
| 390 NA18502 | [2515685 chr10 | 10 | 47889059  | 47889830  | 772     | 2    | -0.739714 | 0.125821 | 47888902  | 47889217  | 47889529  | 4789013  |
| 391 NA18502 | [2515685 chr10 | 10 | 47940488  | 47953558  | 13071   | 23   | 0.27023   | 0.037411 | 47939953  | 47941024  | 47953195  | 4795392: |
| 392 NA18502 | [2515685 chr10 | 10 | 48222213  | 48223283  | 1071    | 2    | 0.676355  | 0.127802 | 48221973  | 48222453  | 48222796  | 4822377: |
| 393 NA18502 | [2515685 chr10 | 10 | 48488814  | 48611077  | 122264  | 303  | -0.274374 | 0.006718 | 48488592  | 48489036  | 48610821  | 4861133: |
| 394 NA18502 | [2515685 chr10 | 10 | 48620019  | 48937668  | 317650  | 388  | -0.274374 | 0.006718 | 48619988  | 48620051  | 48937594  | 4893774: |
| 395 NA18502 | [2515685 chr10 | 10 | 48984041  | 48986108  | 2068    | 4    | -0.476623 | 0.089583 | 48983651  | 48984432  | 48985903  | 4898631: |
| 396 NA18502 | [2515685 chr10 | 10 | 49018455  | 49024083  | 5629    | 12   | 0.297765  | 0.051366 | 49018055  | 49018856  | 49023584  | 4902458: |
| 397 NA18502 | [2515685 chr10 | 10 | 51116619  | 51156297  | 39679   | 82   | -0.307195 | 0.01965  | 51067634  | 51119365  | 51156290  | 5115630: |
| 398 NA18502 | [2515685 chr10 | 10 | 51580352  | 51581394  | 1043    | 2    | 1.444776  | 0.139146 | 51580153  | 51580551  | 51581064  | 5158172: |
| 399 NA18502 | [2515685 chr10 | 10 | 56117212  | 56139275  | 22064   | 20   | -1.023207 | 0.040736 | 56115764  | 56118661  | 56138931  | 5613961: |
| 400 NA18502 | [2515685 chr10 | 10 | 58879708  | 58882015  | 2308    | 5    | -1.033917 | 0.086424 | 58879568  | 58879849  | 58881863  | 5888216: |
| 401 NA18502 | [2515685 chr10 | 10 | 81224097  | 81234149  | 10053   | 11   | -0.292095 | 0.055922 | 81223849  | 81224345  | 81231403  | 8124225: |
| 402 NA18502 | [2515685 chr10 | 10 | 81380942  | 81432382  | 51441   | 59   | -0.261208 | 0.023532 | 81380568  | 81381316  | 81431807  | 8143295: |
| 403 NA18502 | [2515685 chr10 | 10 | 81662330  | 81668479  | 6150    | 9    | -0.410476 | 0.059312 | 81662046  | 81662614  | 81668415  | 8166854: |
| 404 NA18502 | [2515685 chr10 | 10 | 88823459  | 88836422  | 12964   | 17   | -0.342175 | 0.043462 | 88823233  | 88823685  | 88835452  | 8883739: |
| 405 NA18502 | [2515685 chr10 | 10 | 88866216  | 88958947  | 92732   | 103  | -0.454419 | 0.017601 | 88865617  | 88866816  | 88957355  | 8896054: |
| 406 NA18502 | [2515685 chr10 | 10 | 89010538  | 89016296  | 5759    | 8    | -0.371648 | 0.06291  | 89009863  | 89011213  | 89014572  | 8901802: |
| 407 NA18502 | [2515685 chr10 | 10 | 89144692  | 89180666  | 35975   | 56   | -0.339105 | 0.023966 | 89144420  | 89144965  | 89180586  | 8918074: |

|             |                |    |           |           |        |     |           |          |           |           |           |          |
|-------------|----------------|----|-----------|-----------|--------|-----|-----------|----------|-----------|-----------|-----------|----------|
| 408 NA18502 | [2515685 chr10 | 10 | 102488166 | 102492572 | 4407   | 6   | 0.367652  | 0.072643 | 102487783 | 102488550 | 102492353 | 10249279 |
| 409 NA18502 | [2515685 chr10 | 10 | 114102241 | 114106477 | 4237   | 5   | -3.362711 | 0.150038 | 114101694 | 114102788 | 114105867 | 11410708 |
| 410 NA18502 | [2515685 chr10 | 10 | 124333086 | 124335472 | 2387   | 3   | 0.53699   | 0.102732 | 124332451 | 124333721 | 124335364 | 12433558 |
| 411 NA18502 | [2515685 chr10 | 10 | 124336365 | 124341749 | 5385   | 6   | 0.924987  | 0.074183 | 124335581 | 124337149 | 124341238 | 12434226 |
| 412 NA18502 | [2515685 chr10 | 10 | 124345789 | 124348266 | 2478   | 3   | 0.599225  | 0.102732 | 124345154 | 124346424 | 124348238 | 12434829 |
| 413 NA18502 | [2515685 chr10 | 10 | 125182764 | 125184178 | 1415   | 2   | 0.665466  | 0.125821 | 125182454 | 125183075 | 125183729 | 12518462 |
| 414 NA18502 | [2515685 chr10 | 10 | 127512201 | 127515080 | 2880   | 4   | -0.451998 | 0.08897  | 127511833 | 127512570 | 127514637 | 12751552 |
| 415 NA18502 | [2515685 chr10 | 10 | 127564343 | 127582849 | 18507  | 17  | -0.381988 | 0.043156 | 127563306 | 127565381 | 127581533 | 12758416 |
| 416 NA18502 | [2515685 chr10 | 10 | 134168766 | 134170259 | 1494   | 17  | -0.938336 | 0.043155 | 134168524 | 134169008 | 134170097 | 13417042 |
| 417 NA18502 | [2515685 chr10 | 10 | 134926337 | 134958343 | 32007  | 40  | 0.266938  | 0.028134 | 134926184 | 134926490 | 134957814 | 13495887 |
| 418 NA18502 | [2515685 chr10 | 10 | 135039377 | 135042600 | 3224   | 3   | 0.602389  | 0.102732 | 135038382 | 135040372 | 135042356 | 13504284 |
| 419 NA18502 | [2515685 chr10 | 10 | 135367159 | 135389814 | 22656  | 19  | -0.305713 | 0.040822 | 135366656 | 135367663 | 135387500 | 13539212 |
| 420 NA18502 | [2515685 chr11 | 11 | 2809992   | 2820446   | 10455  | 12  | 0.358598  | 0.051366 | 2809675   | 2810309   | 2819910   | 282098   |
| 421 NA18502 | [2515685 chr11 | 11 | 3340621   | 3347185   | 6565   | 3   | -0.823962 | 0.108518 | 3339024   | 3342218   | 3345938   | 3348443  |
| 422 NA18502 | [2515685 chr11 | 11 | 3596686   | 3602209   | 5524   | 7   | 0.349139  | 0.067254 | 3596097   | 3597275   | 3601914   | 360250   |
| 423 NA18502 | [2515685 chr11 | 11 | 3628748   | 3632795   | 4048   | 6   | -2.214771 | 0.082859 | 3625722   | 3631775   | 3632594   | 363299   |
| 424 NA18502 | [2515685 chr11 | 11 | 4196036   | 4334469   | 138434 | 170 | -0.449345 | 0.013721 | 4195615   | 4196457   | 4334236   | 433470   |
| 425 NA18502 | [2515685 chr11 | 11 | 5717038   | 5718491   | 1454   | 2   | 4.023772  | 0.217501 | 5716660   | 5717416   | 5718038   | 571894   |
| 426 NA18502 | [2515685 chr11 | 11 | 5741269   | 5765993   | 24725  | 29  | 1.908715  | 0.044024 | 5741059   | 5741480   | 5765632   | 576635   |
| 427 NA18502 | [2515685 chr11 | 11 | 5830457   | 5843036   | 12580  | 12  | -0.600445 | 0.053191 | 5828206   | 5832709   | 5839952   | 584917   |
| 428 NA18502 | [2515685 chr11 | 11 | 18906905  | 18928671  | 21767  | 29  | 0.686937  | 0.033695 | 18906533  | 18907278  | 18928457  | 1892888  |
| 429 NA18502 | [2515685 chr11 | 11 | 25563262  | 25581847  | 18586  | 23  | -0.756756 | 0.037787 | 25562874  | 25563651  | 25581052  | 2558264  |
| 430 NA18502 | [2515685 chr11 | 11 | 30128605  | 30133794  | 5190   | 5   | -0.817397 | 0.079576 | 30127846  | 30129364  | 30133432  | 3013415  |
| 431 NA18502 | [2515685 chr11 | 11 | 48284073  | 48285508  | 1436   | 3   | 0.587666  | 0.102732 | 48283862  | 48284285  | 48285336  | 4828568  |
| 432 NA18502 | [2515685 chr11 | 11 | 48616682  | 48858032  | 241351 | 12  | -0.344482 | 0.05437  | 48615838  | 48617526  | 48857892  | 4885817  |
| 433 NA18502 | [2515685 chr11 | 11 | 49038483  | 49051212  | 12730  | 29  | -0.304843 | 0.033045 | 490386280 | 49038687  | 49050687  | 4905173  |
| 434 NA18502 | [2515685 chr11 | 11 | 49665830  | 49715832  | 50003  | 36  | 0.342917  | 0.030664 | 49665251  | 49666410  | 49712748  | 4972198  |
| 435 NA18502 | [2515685 chr11 | 11 | 54974441  | 54979405  | 4965   | 3   | -0.644833 | 0.107368 | 54972670  | 54976212  | 54979178  | 5497963  |
| 436 NA18502 | [2515685 chr11 | 11 | 55124643  | 55216488  | 91846  | 99  | -0.727769 | 0.018782 | 55124460  | 55124827  | 55215759  | 5521721  |
| 437 NA18502 | [2515685 chr11 | 11 | 60684527  | 60693989  | 9463   | 9   | 0.342501  | 0.059312 | 60684310  | 60684744  | 60693735  | 6069424  |
| 438 NA18502 | [2515685 chr11 | 11 | 60722802  | 60777477  | 54676  | 72  | 0.615493  | 0.02104  | 60722435  | 60723170  | 60776810  | 6077814  |
| 439 NA18502 | [2515685 chr11 | 11 | 60806571  | 60819905  | 13335  | 14  | 0.252596  | 0.047556 | 60806157  | 60806986  | 60819593  | 6082021  |
| 440 NA18502 | [2515685 chr11 | 11 | 71195164  | 71231215  | 36052  | 66  | 0.278891  | 0.021903 | 71194988  | 71195341  | 71228131  | 7123756  |
| 441 NA18502 | [2515685 chr11 | 11 | 73815147  | 73817979  | 2833   | 2   | -0.769233 | 0.125821 | 73812981  | 73817313  | 73817746  | 7381821  |
| 442 NA18502 | [2515685 chr11 | 11 | 79652672  | 79662284  | 9613   | 8   | -0.743346 | 0.064577 | 79651987  | 79653357  | 79659200  | 7966807  |
| 443 NA18502 | [2515685 chr11 | 11 | 85981700  | 85984113  | 2414   | 3   | -0.683219 | 0.102732 | 85981147  | 85982254  | 85983791  | 8598443  |
| 444 NA18502 | [2515685 chr11 | 11 | 89135297  | 89149453  | 14157  | 20  | -0.292507 | 0.040242 | 89134626  | 89135969  | 89148961  | 8914994  |
| 445 NA18502 | [2515685 chr11 | 11 | 89214964  | 89375169  | 160206 | 274 | -0.263117 | 0.010823 | 89214753  | 89215176  | 89374958  | 8937538  |
| 446 NA18502 | [2515685 chr11 | 11 | 104427891 | 104437123 | 9233   | 11  | -0.626615 | 0.056809 | 104425560 | 104430223 | 104436554 | 10443769 |
| 447 NA18502 | [2515685 chr11 | 11 | 106744846 | 106751055 | 6210   | 9   | -0.741338 | 0.063554 | 106744561 | 106745131 | 106747971 | 10675483 |
| 448 NA18502 | [2515685 chr11 | 11 | 134107699 | 134112290 | 4592   | 5   | 0.738854  | 0.083009 | 134106591 | 134108808 | 134111845 | 13411273 |
| 449 NA18502 | [2515685 chr12 | 12 | 398598    | 404873    | 6276   | 14  | 0.34008   | 0.047556 | 398035    | 399161    | 401600    | 408146   |
| 450 NA18502 | [2515685 chr12 | 12 | 530321    | 536927    | 6607   | 9   | 0.29854   | 0.059312 | 530087    | 530555    | 536719    | 537136   |
| 451 NA18502 | [2515685 chr12 | 12 | 736840    | 744802    | 7963   | 9   | 0.825807  | 0.05997  | 736616    | 737064    | 744211    | 74539    |
| 452 NA18502 | [2515685 chr12 | 12 | 2112534   | 2127044   | 14511  | 15  | 0.6665    | 0.046736 | 2109107   | 2115961   | 2126809   | 212727   |
| 453 NA18502 | [2515685 chr12 | 12 | 6110940   | 6118188   | 7249   | 5   | 0.487129  | 0.084084 | 6110241   | 6111640   | 6117816   | 611856   |
| 454 NA18502 | [2515685 chr12 | 12 | 8235890   | 8254404   | 18515  | 17  | 0.515397  | 0.043167 | 8233704   | 8238076   | 8254117   | 825469   |
| 455 NA18502 | [2515685 chr12 | 12 | 8262986   | 8270350   | 7365   | 18  | 0.878409  | 0.042006 | 8262374   | 8263598   | 8269654   | 827104   |
| 456 NA18502 | [2515685 chr12 | 12 | 8439631   | 8441259   | 1629   | 5   | 0.576318  | 0.079576 | 8439470   | 8439792   | 8440982   | 844153   |
| 457 NA18502 | [2515685 chr12 | 12 | 9359914   | 9361328   | 1415   | 4   | 0.447613  | 0.088969 | 9359727   | 9360101   | 9360890   | 936176   |
| 458 NA18502 | [2515685 chr12 | 12 | 9456545   | 9466141   | 9597   | 20  | 0.262572  | 0.039788 | 9455929   | 9457161   | 9465803   | 946648   |
| 459 NA18502 | [2515685 chr12 | 12 | 9524239   | 9610804   | 86566  | 94  | 1.081006  | 0.020134 | 9523968   | 9524510   | 9610082   | 961152   |
| 460 NA18502 | [2515685 chr12 | 12 | 9617501   | 9624971   | 7471   | 7   | 0.755004  | 0.070176 | 9617287   | 9617716   | 9623223   | 962672   |
| 461 NA18502 | [2515685 chr12 | 12 | 11060019  | 11183611  | 123593 | 134 | -0.355498 | 0.015461 | 11059499  | 11060539  | 11183009  | 1118421  |
| 462 NA18502 | [2515685 chr12 | 12 | 11316987  | 11324502  | 7516   | 10  | -0.296389 | 0.02774  | 11316630  | 11317345  | 11323603  | 1132540  |

|             |                |    |           |           |        |     |           |          |           |           |           |           |
|-------------|----------------|----|-----------|-----------|--------|-----|-----------|----------|-----------|-----------|-----------|-----------|
| 463 NA18502 | [2515685 chr12 | 12 | 11350410  | 11380186  | 29777  | 26  | -0.296389 | 0.02774  | 11350198  | 11350623  | 11376693  | 1138536:  |
| 464 NA18502 | [2515685 chr12 | 12 | 11398049  | 11463223  | 65175  | 66  | -1.023163 | 0.023777 | 11397507  | 11398591  | 11459990  | 1146645:  |
| 465 NA18502 | [2515685 chr12 | 12 | 21007205  | 21038925  | 31721  | 16  | -0.319089 | 0.045502 | 21007080  | 21007330  | 21038868  | 2103898:  |
| 466 NA18502 | [2515685 chr12 | 12 | 22462548  | 22473120  | 10573  | 7   | 0.668091  | 0.071912 | 22461792  | 22463304  | 22471641  | 2247459:  |
| 467 NA18502 | [2515685 chr12 | 12 | 30284867  | 30293166  | 8300   | 7   | -0.394708 | 0.074032 | 30284578  | 30285157  | 30291261  | 3029507:  |
| 468 NA18502 | [2515685 chr12 | 12 | 31098004  | 31099555  | 1552   | 2   | 0.669862  | 0.125821 | 31097721  | 31098287  | 31099075  | 3110003:  |
| 469 NA18502 | [2515685 chr12 | 12 | 31155331  | 31244780  | 89450  | 84  | 0.60606   | 0.020098 | 31155092  | 31155571  | 31244217  | 3124534:  |
| 470 NA18502 | [2515685 chr12 | 12 | 34076014  | 34076899  | 886    | 2   | -0.742004 | 0.13495  | 34075687  | 34076341  | 34076717  | 3407708:  |
| 471 NA18502 | [2515685 chr12 | 12 | 34373584  | 34656168  | 282585 | 72  | 0.391733  | 0.021039 | 34322089  | 34377077  | 34652675  | 3614412:  |
| 472 NA18502 | [2515685 chr12 | 12 | 36218223  | 36229027  | 10805  | 10  | 0.358636  | 0.056269 | 36216143  | 36220304  | 36228905  | 3622915:  |
| 473 NA18502 | [2515685 chr12 | 12 | 36728958  | 36737753  | 8796   | 16  | 0.257484  | 0.044484 | 36728858  | 36729059  | 36736974  | 3673853:  |
| 474 NA18502 | [2515685 chr12 | 12 | 38588265  | 38601876  | 13612  | 14  | -0.814223 | 0.049455 | 38587700  | 38588831  | 38601186  | 3860256:  |
| 475 NA18502 | [2515685 chr12 | 12 | 69156919  | 69167889  | 10971  | 11  | 0.6842    | 0.055262 | 69138649  | 69160412  | 69164396  | 6921501:  |
| 476 NA18502 | [2515685 chr12 | 12 | 70475445  | 70476812  | 1368   | 2   | -0.773501 | 0.128449 | 70475180  | 70475711  | 70476524  | 7047710:  |
| 477 NA18502 | [2515685 chr12 | 12 | 78656134  | 78662713  | 6580   | 5   | -0.799701 | 0.082058 | 78654687  | 78657582  | 78662575  | 7866285:  |
| 478 NA18502 | [2515685 chr12 | 12 | 98296195  | 98302023  | 5829   | 12  | -0.705508 | 0.053592 | 98295885  | 98296506  | 98298530  | 9830594:  |
| 479 NA18502 | [2515685 chr12 | 12 | 127776122 | 127777423 | 1302   | 2   | 0.64103   | 0.125821 | 127775787 | 127776458 | 127777055 | 12777779: |
| 480 NA18502 | [2515685 chr12 | 12 | 129395501 | 129397499 | 1999   | 14  | 0.459372  | 0.047556 | 129395008 | 129395994 | 129397172 | 12939782: |
| 481 NA18502 | [2515685 chr12 | 12 | 130299914 | 130301871 | 1958   | 3   | 0.54905   | 0.102732 | 130299668 | 130300160 | 130301594 | 13030214: |
| 482 NA18502 | [2515685 chr12 | 12 | 131046250 | 131046750 | 501    | 2   | 1.266437  | 0.133112 | 131046129 | 131046371 | 131046551 | 13104694: |
| 483 NA18502 | [2515685 chr12 | 12 | 132249060 | 132249924 | 865    | 2   | 0.722586  | 0.125821 | 132248918 | 132249203 | 132249666 | 13225018: |
| 484 NA18502 | [2515685 chr13 | 13 | 18217757  | 18277248  | 59492  | 20  | 0.276483  | 0.039788 | 18217719  | 18217795  | 18245111  | 1827938:  |
| 485 NA18502 | [2515685 chr13 | 13 | 25947233  | 25950398  | 3166   | 3   | 2.703312  | 0.137043 | 25946194  | 25948272  | 25949415  | 2595138:  |
| 486 NA18502 | [2515685 chr13 | 13 | 31430484  | 31437209  | 6726   | 7   | -0.627146 | 0.071243 | 31430130  | 31430838  | 31436488  | 3143793:  |
| 487 NA18502 | [2515685 chr13 | 13 | 33029573  | 33042392  | 12820  | 8   | 0.644458  | 0.06625  | 33000262  | 33034253  | 33041860  | 3304292:  |
| 488 NA18502 | [2515685 chr13 | 13 | 56653890  | 56686136  | 32247  | 30  | -0.802101 | 0.034223 | 56650401  | 56657380  | 56685381  | 5668689:  |
| 489 NA18502 | [2515685 chr13 | 13 | 56705131  | 56721933  | 16803  | 17  | 0.341823  | 0.043599 | 56701729  | 56708533  | 56720474  | 5672339:  |
| 490 NA18502 | [2515685 chr13 | 13 | 65909883  | 65912121  | 2239   | 2   | 0.669613  | 0.125821 | 65909211  | 65910555  | 65911294  | 6591294:  |
| 491 NA18502 | [2515685 chr13 | 13 | 69633905  | 69673289  | 39385  | 42  | 0.654437  | 0.028675 | 69633412  | 69634399  | 69672985  | 6967359:  |
| 492 NA18502 | [2515685 chr13 | 13 | 84596974  | 84604069  | 7096   | 4   | -0.452209 | 0.090394 | 84590963  | 84601654  | 84603798  | 8460434:  |
| 493 NA18502 | [2515685 chr13 | 13 | 109215660 | 109217089 | 1430   | 5   | 0.723122  | 0.079576 | 109215230 | 109216090 | 109216885 | 10921729: |
| 494 NA18502 | [2515685 chr13 | 13 | 113079647 | 113081814 | 2168   | 2   | 0.890873  | 0.125821 | 113078890 | 113080404 | 113081491 | 11308213: |
| 495 NA18502 | [2515685 chr14 | 14 | 18437470  | 18707498  | 270029 | 386 | -0.405891 | 0.00447  | 18437443  | 18437497  | 18706650  | 1870834:  |
| 496 NA18502 | [2515685 chr14 | 14 | 18713012  | 18716871  | 3860   | 10  | -0.405891 | 0.00447  | 18712887  | 18713138  | 18716793  | 1871694:  |
| 497 NA18502 | [2515685 chr14 | 14 | 18719957  | 18750673  | 30717  | 49  | -0.405891 | 0.00447  | 18719717  | 18720197  | 18750497  | 1875085:  |
| 498 NA18502 | [2515685 chr14 | 14 | 18758859  | 18835931  | 77073  | 154 | -0.405891 | 0.00447  | 18758795  | 18758923  | 18835888  | 1883597:  |
| 499 NA18502 | [2515685 chr14 | 14 | 18850498  | 19002674  | 152177 | 266 | -0.405891 | 0.00447  | 18850172  | 18850824  | 19002499  | 1900284:  |
| 500 NA18502 | [2515685 chr14 | 14 | 19007888  | 19143339  | 135452 | 245 | -0.405891 | 0.00447  | 19007039  | 19008737  | 19143095  | 1914358:  |
| 501 NA18502 | [2515685 chr14 | 14 | 19145876  | 19174829  | 28954  | 50  | -0.405891 | 0.00447  | 19145143  | 19146610  | 19174593  | 1917506:  |
| 502 NA18502 | [2515685 chr14 | 14 | 19177839  | 19254367  | 76529  | 125 | -0.405891 | 0.00447  | 19177094  | 19178584  | 19254200  | 1925453:  |
| 503 NA18502 | [2515685 chr14 | 14 | 19280719  | 19364312  | 83594  | 75  | -0.405891 | 0.00447  | 19280472  | 19280967  | 19363973  | 1936465:  |
| 504 NA18502 | [2515685 chr14 | 14 | 19372197  | 19494842  | 122646 | 121 | -0.405891 | 0.00447  | 19367437  | 19377318  | 19494444  | 1949524:  |
| 505 NA18502 | [2515685 chr14 | 14 | 19619354  | 19625484  | 6131   | 3   | 2.922842  | 0.212004 | 19612261  | 19624114  | 19625018  | 1962595:  |
| 506 NA18502 | [2515685 chr14 | 14 | 27460997  | 27466157  | 5161   | 7   | -0.379042 | 0.071829 | 27460740  | 27461254  | 27465668  | 2746664:  |
| 507 NA18502 | [2515685 chr14 | 14 | 32022775  | 32026140  | 3366   | 2   | -0.807521 | 0.125821 | 32022274  | 32023276  | 32023749  | 3202853:  |
| 508 NA18502 | [2515685 chr14 | 14 | 40892019  | 40897384  | 5366   | 6   | -0.422443 | 0.0794   | 40891793  | 40892245  | 40897151  | 4089761:  |
| 509 NA18502 | [2515685 chr14 | 14 | 41983819  | 41990026  | 6208   | 6   | -0.445998 | 0.073896 | 41983366  | 41984273  | 41989626  | 4199042:  |
| 510 NA18502 | [2515685 chr14 | 14 | 42059344  | 42062997  | 3654   | 2   | 0.774245  | 0.125821 | 42056485  | 42062203  | 42062601  | 4206339:  |
| 511 NA18502 | [2515685 chr14 | 14 | 73063171  | 73122855  | 59685  | 54  | 0.75262   | 0.024742 | 73061866  | 73064476  | 73122227  | 7312348:  |
| 512 NA18502 | [2515685 chr14 | 14 | 104680375 | 104720861 | 40487  | 52  | 0.297252  | 0.024675 | 104679870 | 104680880 | 104720126 | 10472159: |
| 513 NA18502 | [2515685 chr14 | 14 | 104766812 | 104778505 | 11694  | 145 | -0.37407  | 0.014776 | 104766457 | 104767167 | 104778286 | 10477872: |
| 514 NA18502 | [2515685 chr15 | 15 | 18509147  | 18533067  | 23921  | 26  | 0.378703  | 0.034896 | 18508505  | 18509790  | 18532844  | 1853329:  |
| 515 NA18502 | [2515685 chr15 | 15 | 18705202  | 18750936  | 45735  | 50  | 0.436974  | 0.025166 | 18704600  | 18705805  | 18750719  | 1875115:  |
| 516 NA18502 | [2515685 chr15 | 15 | 18804664  | 18855168  | 50505  | 60  | 0.406802  | 0.022972 | 18804357  | 18804971  | 18854988  | 1885534:  |
| 517 NA18502 | [2515685 chr15 | 15 | 18906667  | 18908829  | 2163   | 4   | 0.650449  | 0.088969 | 18906373  | 18906961  | 18908592  | 1890906:  |

|             |                |    |           |           |        |     |           |          |           |           |           |           |
|-------------|----------------|----|-----------|-----------|--------|-----|-----------|----------|-----------|-----------|-----------|-----------|
| 518 NA18502 | [2515685 chr15 | 15 | 18994141  | 18995576  | 1436   | 7   | 0.387073  | 0.067254 | 18993962  | 18994321  | 18995346  | 18995807  |
| 519 NA18502 | [2515685 chr15 | 15 | 19099205  | 19110049  | 10845  | 16  | 0.440862  | 0.044484 | 19093862  | 19101508  | 19109165  | 19110934  |
| 520 NA18502 | [2515685 chr15 | 15 | 19346430  | 19466745  | 120316 | 134 | 0.292645  | 0.015428 | 19346222  | 19346639  | 19466696  | 19466794  |
| 521 NA18502 | [2515685 chr15 | 15 | 19520574  | 19544907  | 24334  | 32  | 0.357746  | 0.03191  | 19519929  | 19521219  | 19544684  | 19545134  |
| 522 NA18502 | [2515685 chr15 | 15 | 19761204  | 19795268  | 34065  | 37  | 0.328076  | 0.02964  | 19663241  | 19763507  | 19795095  | 19795444  |
| 523 NA18502 | [2515685 chr15 | 15 | 19841764  | 19846522  | 4759   | 9   | 0.498477  | 0.059677 | 19841471  | 19842058  | 19845941  | 19847104  |
| 524 NA18502 | [2515685 chr15 | 15 | 19874194  | 19884979  | 10786  | 15  | -0.567074 | 0.046768 | 19873671  | 19874718  | 19884772  | 19885184  |
| 525 NA18502 | [2515685 chr15 | 15 | 19916618  | 20091650  | 175033 | 175 | 0.451759  | 0.013479 | 19916422  | 19916814  | 20091416  | 20091884  |
| 526 NA18502 | [2515685 chr15 | 15 | 20242111  | 20250088  | 7978   | 8   | 0.370908  | 0.06291  | 20241894  | 20242329  | 20249914  | 20250264  |
| 527 NA18502 | [2515685 chr15 | 15 | 20865501  | 20867668  | 2168   | 4   | 0.619833  | 0.088969 | 20865204  | 20865798  | 20867431  | 20867904  |
| 528 NA18502 | [2515685 chr15 | 15 | 20952362  | 20953220  | 859    | 5   | 0.454387  | 0.079576 | 20952183  | 20952542  | 20953050  | 20953394  |
| 529 NA18502 | [2515685 chr15 | 15 | 21015083  | 21119579  | 104497 | 66  | 0.270157  | 0.021903 | 21014882  | 21015285  | 21119347  | 21119814  |
| 530 NA18502 | [2515685 chr15 | 15 | 21876122  | 21896364  | 20243  | 18  | -0.301791 | 0.042802 | 21875893  | 21876351  | 21896193  | 21896534  |
| 531 NA18502 | [2515685 chr15 | 15 | 21909483  | 21911874  | 2392   | 2   | -0.653781 | 0.125821 | 21909076  | 21909890  | 21911741  | 21912004  |
| 532 NA18502 | [2515685 chr15 | 15 | 22072249  | 22090966  | 18718  | 27  | -0.297556 | 0.03461  | 22072114  | 22072385  | 22090382  | 22091554  |
| 533 NA18502 | [2515685 chr15 | 15 | 22201767  | 22223001  | 21235  | 29  | -0.273828 | 0.033115 | 22201609  | 22201926  | 22222812  | 22223194  |
| 534 NA18502 | [2515685 chr15 | 15 | 22237721  | 22273082  | 35362  | 45  | -0.365828 | 0.027065 | 22237445  | 22237998  | 22272928  | 22273234  |
| 535 NA18502 | [2515685 chr15 | 15 | 22658272  | 22662230  | 3959   | 3   | -1.09099  | 0.104175 | 22658051  | 22658494  | 22659927  | 22669494  |
| 536 NA18502 | [2515685 chr15 | 15 | 24986053  | 24992250  | 6198   | 7   | 0.651337  | 0.069186 | 24985426  | 24986680  | 24991680  | 24992824  |
| 537 NA18502 | [2515685 chr15 | 15 | 26135294  | 26137335  | 2042   | 4   | 0.618372  | 0.088969 | 26134997  | 26135591  | 26137216  | 26137454  |
| 538 NA18502 | [2515685 chr15 | 15 | 26263621  | 26265055  | 1435   | 7   | 0.39988   | 0.067254 | 26263442  | 26263801  | 26264823  | 26265284  |
| 539 NA18502 | [2515685 chr15 | 15 | 26610077  | 26610934  | 858    | 5   | 0.454387  | 0.079576 | 26609907  | 26610247  | 26610755  | 26611114  |
| 540 NA18502 | [2515685 chr15 | 15 | 26695549  | 26697710  | 2162   | 4   | 0.610493  | 0.088969 | 26695312  | 26695786  | 26697414  | 26698004  |
| 541 NA18502 | [2515685 chr15 | 15 | 26720534  | 26724738  | 4205   | 4   | -0.461418 | 0.088969 | 26719786  | 26721283  | 26724292  | 26725184  |
| 542 NA18502 | [2515685 chr15 | 15 | 26859725  | 26863461  | 3737   | 5   | -0.4308   | 0.079576 | 26859503  | 26859948  | 26863295  | 26863624  |
| 543 NA18502 | [2515685 chr15 | 15 | 28183172  | 28214153  | 30982  | 63  | -0.265944 | 0.022417 | 28182925  | 28183419  | 28213965  | 28214344  |
| 544 NA18502 | [2515685 chr15 | 15 | 28461402  | 28471779  | 10378  | 23  | -0.288467 | 0.037102 | 28460916  | 28461889  | 28470757  | 28472804  |
| 545 NA18502 | [2515685 chr15 | 15 | 28653461  | 28682435  | 28975  | 60  | -0.254551 | 0.022972 | 28652423  | 28654500  | 28681552  | 28683314  |
| 546 NA18502 | [2515685 chr15 | 15 | 30483175  | 30513546  | 30372  | 60  | -0.261652 | 0.023029 | 30482988  | 30483363  | 30512958  | 30514134  |
| 547 NA18502 | [2515685 chr15 | 15 | 30618243  | 30626418  | 8176   | 17  | -0.289489 | 0.044912 | 30617993  | 30618493  | 30625946  | 30626894  |
| 548 NA18502 | [2515685 chr15 | 15 | 32489473  | 32495147  | 5675   | 6   | 0.43303   | 0.072643 | 32488638  | 32490308  | 32494339  | 32495954  |
| 549 NA18502 | [2515685 chr15 | 15 | 32636585  | 32641373  | 4789   | 6   | 0.466406  | 0.072643 | 32636530  | 32636640  | 32640565  | 32642184  |
| 550 NA18502 | [2515685 chr15 | 15 | 41674906  | 41679935  | 5030   | 9   | 0.321664  | 0.059312 | 41674664  | 41675148  | 41679570  | 41680304  |
| 551 NA18502 | [2515685 chr15 | 15 | 42905343  | 42906197  | 855    | 3   | -0.692165 | 0.102732 | 42905218  | 42905469  | 42905981  | 42906644  |
| 552 NA18502 | [2515685 chr15 | 15 | 43153369  | 43154013  | 645    | 2   | -0.836148 | 0.125821 | 43153155  | 43153584  | 43153678  | 43154344  |
| 553 NA18502 | [2515685 chr15 | 15 | 74671388  | 74682821  | 11434  | 9   | 0.823825  | 0.063839 | 74671122  | 74671654  | 74680518  | 74689514  |
| 554 NA18502 | [2515685 chr15 | 15 | 75117585  | 75119490  | 1906   | 3   | 0.714255  | 0.104755 | 75117343  | 75117827  | 75119240  | 75119744  |
| 555 NA18502 | [2515685 chr15 | 15 | 82869848  | 82876848  | 7001   | 3   | -0.521099 | 0.102732 | 82860467  | 82872151  | 82875844  | 82877854  |
| 556 NA18502 | [2515685 chr15 | 15 | 83685983  | 83688723  | 2741   | 2   | -0.679868 | 0.125821 | 83684729  | 83687238  | 83687705  | 83689744  |
| 557 NA18502 | [2515685 chr15 | 15 | 95613870  | 95617173  | 3304   | 2   | 0.684512  | 0.125821 | 95609763  | 95616173  | 95616758  | 95617584  |
| 558 NA18502 | [2515685 chr15 | 15 | 95898352  | 95902632  | 4281   | 7   | -0.387651 | 0.068052 | 95898147  | 95898557  | 95901991  | 95903274  |
| 559 NA18502 | [2515685 chr15 | 15 | 98234084  | 98240716  | 6633   | 8   | 0.719334  | 0.0733   | 98233842  | 98234327  | 98239350  | 98242084  |
| 560 NA18502 | [2515685 chr15 | 15 | 99664319  | 99667722  | 3404   | 4   | 0.528559  | 0.088969 | 99664041  | 99664598  | 99667231  | 99668214  |
| 561 NA18502 | [2515685 chr15 | 15 | 100109640 | 100122682 | 13043  | 98  | 0.754369  | 0.01798  | 100108905 | 100110376 | 100122315 | 100123054 |
| 562 NA18502 | [2515685 chr16 | 16 | 806992    | 808765    | 1774   | 2   | 0.66324   | 0.125821 | 806062    | 807922    | 808458    | 809072    |
| 563 NA18502 | [2515685 chr16 | 16 | 2638196   | 2640225   | 2030   | 3   | -0.562584 | 0.106299 | 2637783   | 2638609   | 2639826   | 2640624   |
| 564 NA18502 | [2515685 chr16 | 16 | 5287117   | 5290632   | 3516   | 2   | 1.152876  | 0.146959 | 5286149   | 5288085   | 5288751   | 5293274   |
| 565 NA18502 | [2515685 chr16 | 16 | 5367156   | 5369567   | 2412   | 3   | -0.821808 | 0.102732 | 5366406   | 5367907   | 5369326   | 5369804   |
| 566 NA18502 | [2515685 chr16 | 16 | 12597419  | 12615138  | 17720  | 15  | -0.441752 | 0.046838 | 12588878  | 12599300  | 12614734  | 12615544  |
| 567 NA18502 | [2515685 chr16 | 16 | 14694328  | 14707381  | 13054  | 11  | 0.639373  | 0.05365  | 14693859  | 14694798  | 14706351  | 14708414  |
| 568 NA18502 | [2515685 chr16 | 16 | 14733448  | 14746503  | 13056  | 11  | 0.639373  | 0.05365  | 14732976  | 14733921  | 14745473  | 14747534  |
| 569 NA18502 | [2515685 chr16 | 16 | 14955818  | 15030359  | 74542  | 68  | -0.290295 | 0.021624 | 14955356  | 14956281  | 15029969  | 15030754  |
| 570 NA18502 | [2515685 chr16 | 16 | 15711970  | 15720652  | 8683   | 10  | 0.293318  | 0.056269 | 15711487  | 15712454  | 15720125  | 15721174  |
| 571 NA18502 | [2515685 chr16 | 16 | 16470058  | 16471982  | 1925   | 3   | -0.560916 | 0.112168 | 16469461  | 16470656  | 16471575  | 16472394  |
| 572 NA18502 | [2515685 chr16 | 16 | 16633469  | 16639120  | 5652   | 4   | 0.651351  | 0.089352 | 16632502  | 16634437  | 16638386  | 16639854  |

|             |                |    |          |          |        |     |           |          |          |          |          |          |
|-------------|----------------|----|----------|----------|--------|-----|-----------|----------|----------|----------|----------|----------|
| 573 NA18502 | [2515685 chr16 | 16 | 18508330 | 18511859 | 3530   | 5   | 0.416978  | 0.079576 | 18507917 | 18508743 | 18511570 | 18512141 |
| 574 NA18502 | [2515685 chr16 | 16 | 28507651 | 28533918 | 26268  | 36  | 0.262368  | 0.029656 | 28507328 | 28507974 | 28533647 | 28534181 |
| 575 NA18502 | [2515685 chr16 | 16 | 29368396 | 29396218 | 27823  | 38  | 0.27444   | 0.028865 | 29368118 | 29368674 | 29395889 | 29396541 |
| 576 NA18502 | [2515685 chr16 | 16 | 30098809 | 30137274 | 38466  | 53  | 0.256923  | 0.024442 | 30098038 | 30099581 | 30137202 | 30137374 |
| 577 NA18502 | [2515685 chr16 | 16 | 32073573 | 32075147 | 1575   | 4   | 0.738371  | 0.088969 | 32073268 | 32073879 | 32074517 | 32075771 |
| 578 NA18502 | [2515685 chr16 | 16 | 32159898 | 32160377 | 480    | 2   | -0.768518 | 0.125821 | 32159453 | 32160343 | 32160346 | 32160401 |
| 579 NA18502 | [2515685 chr16 | 16 | 32606692 | 32607163 | 472    | 2   | -0.768518 | 0.125821 | 32606661 | 32606724 | 32606727 | 32607591 |
| 580 NA18502 | [2515685 chr16 | 16 | 32690003 | 32691563 | 1561   | 4   | 0.738371  | 0.088969 | 32689373 | 32690634 | 32691272 | 32691851 |
| 581 NA18502 | [2515685 chr16 | 16 | 33016481 | 33018043 | 1563   | 4   | 0.738371  | 0.088969 | 33016187 | 33016775 | 33017413 | 33018671 |
| 582 NA18502 | [2515685 chr16 | 16 | 33100875 | 33101346 | 472    | 2   | -0.768518 | 0.125821 | 33100438 | 33101312 | 33101315 | 33101371 |
| 583 NA18502 | [2515685 chr16 | 16 | 33157406 | 33157879 | 474    | 2   | -0.768518 | 0.125821 | 33156967 | 33157845 | 33157848 | 33157911 |
| 584 NA18502 | [2515685 chr16 | 16 | 33282049 | 33336488 | 54440  | 64  | 0.345447  | 0.022242 | 33281743 | 33282355 | 33336324 | 33336651 |
| 585 NA18502 | [2515685 chr16 | 16 | 33512489 | 33526848 | 14360  | 21  | 0.357226  | 0.038829 | 33511938 | 33513041 | 33526548 | 33527141 |
| 586 NA18502 | [2515685 chr16 | 16 | 34326899 | 34476111 | 149213 | 144 | -0.417609 | 0.010224 | 34326619 | 34327179 | 34475942 | 34476281 |
| 587 NA18502 | [2515685 chr16 | 16 | 34478341 | 34541632 | 63292  | 83  | -0.417609 | 0.010224 | 34478193 | 34478489 | 34540042 | 34543221 |
| 588 NA18502 | [2515685 chr16 | 16 | 34548775 | 34609074 | 60300  | 74  | -0.417609 | 0.010224 | 34548392 | 34549159 | 34607193 | 34617321 |
| 589 NA18502 | [2515685 chr16 | 16 | 57204541 | 57207585 | 3045   | 3   | 3.357054  | 0.174491 | 57204170 | 57204913 | 57206938 | 57208231 |
| 590 NA18502 | [2515685 chr16 | 16 | 68711106 | 68748006 | 36901  | 40  | -0.348886 | 0.028173 | 68710302 | 68711911 | 68747606 | 68748401 |
| 591 NA18502 | [2515685 chr16 | 16 | 72930342 | 72952720 | 22379  | 20  | -0.290272 | 0.040106 | 72929814 | 72930870 | 72951609 | 72953831 |
| 592 NA18502 | [2515685 chr16 | 16 | 76930776 | 76942282 | 11507  | 9   | 0.651855  | 0.059336 | 76930290 | 76931263 | 76941602 | 76942961 |
| 593 NA18502 | [2515685 chr16 | 16 | 83994929 | 84004171 | 9243   | 81  | -0.528116 | 0.019773 | 83994558 | 83995300 | 84003767 | 84004571 |
| 594 NA18502 | [2515685 chr16 | 16 | 86577814 | 86584602 | 6789   | 6   | -0.395753 | 0.075615 | 86577511 | 86578118 | 86583983 | 86585521 |
| 595 NA18502 | [2515685 chr16 | 16 | 88173073 | 88174748 | 1676   | 3   | 0.609887  | 0.102732 | 88172794 | 88173352 | 88174105 | 88175391 |
| 596 NA18502 | [2515685 chr16 | 16 | 88690375 | 88710329 | 19955  | 27  | 0.264092  | 0.034244 | 88689870 | 88690880 | 88710203 | 88710451 |
| 597 NA18502 | [2515685 chr17 | 17 | 18857084 | 18993014 | 135931 | 236 | 0.471952  | 0.00908  | 18856742 | 18857427 | 18992585 | 18993441 |
| 598 NA18502 | [2515685 chr17 | 17 | 18997456 | 19068740 | 71285  | 138 | 0.471952  | 0.00908  | 18996984 | 18997929 | 19068268 | 19069211 |
| 599 NA18502 | [2515685 chr17 | 17 | 19072947 | 19082194 | 9248   | 9   | 0.341911  | 0.059312 | 19072753 | 19073142 | 19081776 | 19082611 |
| 600 NA18502 | [2515685 chr17 | 17 | 21415033 | 21418282 | 3250   | 2   | 0.924961  | 0.125821 | 21410935 | 21417234 | 21417641 | 21418921 |
| 601 NA18502 | [2515685 chr17 | 17 | 21423670 | 21424469 | 800    | 3   | -0.76121  | 0.104244 | 21423419 | 21423921 | 21424282 | 21424651 |
| 602 NA18502 | [2515685 chr17 | 17 | 21743034 | 21744425 | 1392   | 4   | -0.692517 | 0.089945 | 21742564 | 21743505 | 21744265 | 21744581 |
| 603 NA18502 | [2515685 chr17 | 17 | 21826349 | 21834752 | 8404   | 7   | 0.96949   | 0.067252 | 21826238 | 21826461 | 21833710 | 21835791 |
| 604 NA18502 | [2515685 chr17 | 17 | 21946928 | 21948121 | 1194   | 2   | -0.728682 | 0.125821 | 21946587 | 21947270 | 21947757 | 21948481 |
| 605 NA18502 | [2515685 chr17 | 17 | 28819838 | 28905566 | 85729  | 2   | -0.688197 | 0.125821 | 28709546 | 28822039 | 28903365 | 28949831 |
| 606 NA18502 | [2515685 chr17 | 17 | 31430406 | 31461078 | 30673  | 51  | 0.545795  | 0.00766  | 31429658 | 31431155 | 31460534 | 31461621 |
| 607 NA18502 | [2515685 chr17 | 17 | 31505204 | 31835531 | 330328 | 457 | 0.545795  | 0.00766  | 31504585 | 31505824 | 31835215 | 31835841 |
| 608 NA18502 | [2515685 chr17 | 17 | 31865078 | 31886556 | 21479  | 65  | 0.455829  | 0.02207  | 31864350 | 31865807 | 31886086 | 31887021 |
| 609 NA18502 | [2515685 chr17 | 17 | 32829500 | 32835174 | 5675   | 6   | 0.919241  | 0.072806 | 32828825 | 32830175 | 32833793 | 32836551 |
| 610 NA18502 | [2515685 chr17 | 17 | 33342783 | 33353504 | 10722  | 22  | -0.253164 | 0.037936 | 33339684 | 33344984 | 33353350 | 33353651 |
| 611 NA18502 | [2515685 chr17 | 17 | 33354516 | 33395697 | 41182  | 113 | 0.436505  | 0.00882  | 33354273 | 33354759 | 33395511 | 33395881 |
| 612 NA18502 | [2515685 chr17 | 17 | 33408561 | 33656856 | 248296 | 283 | 0.436505  | 0.00882  | 33408077 | 33409045 | 33656725 | 33656981 |
| 613 NA18502 | [2515685 chr17 | 17 | 36646378 | 36649001 | 2624   | 2   | -0.640483 | 0.125821 | 36645905 | 36646851 | 36648704 | 36649291 |
| 614 NA18502 | [2515685 chr17 | 17 | 36675530 | 36685343 | 9814   | 10  | -0.638215 | 0.059876 | 36675011 | 36676049 | 36684647 | 36686041 |
| 615 NA18502 | [2515685 chr17 | 17 | 36760802 | 36779372 | 18571  | 20  | -0.634446 | 0.042854 | 36760010 | 36761595 | 36779070 | 36779671 |
| 616 NA18502 | [2515685 chr17 | 17 | 36785682 | 36798742 | 13061  | 10  | 0.441583  | 0.057293 | 36785202 | 36786162 | 36798505 | 36798981 |
| 617 NA18502 | [2515685 chr17 | 17 | 41918655 | 41936195 | 17541  | 17  | -0.304671 | 0.043156 | 41917641 | 41919669 | 41935940 | 41936451 |
| 618 NA18502 | [2515685 chr17 | 17 | 42478607 | 42486351 | 7745   | 14  | 0.253126  | 0.047556 | 42478053 | 42479161 | 42486064 | 42486631 |
| 619 NA18502 | [2515685 chr17 | 17 | 42978063 | 43026670 | 48608  | 72  | 0.628653  | 0.021009 | 42977854 | 42978272 | 43025568 | 43027771 |
| 620 NA18502 | [2515685 chr17 | 17 | 43126717 | 43133059 | 6343   | 3   | 0.524731  | 0.102732 | 43125872 | 43127562 | 43131328 | 43134791 |
| 621 NA18502 | [2515685 chr17 | 17 | 55368842 | 55372541 | 3700   | 5   | 0.475602  | 0.079576 | 55368278 | 55369406 | 55372325 | 55372751 |
| 622 NA18502 | [2515685 chr17 | 17 | 55436772 | 55464705 | 27934  | 45  | 0.353319  | 0.026524 | 55436212 | 55437333 | 55464088 | 55465321 |
| 623 NA18502 | [2515685 chr17 | 17 | 55513801 | 55560453 | 46653  | 21  | 0.279769  | 0.038902 | 55513299 | 55514303 | 55558252 | 55591671 |
| 624 NA18502 | [2515685 chr17 | 17 | 57652724 | 57667804 | 15081  | 18  | 0.351311  | 0.04194  | 57652052 | 57653396 | 57667259 | 57668341 |
| 625 NA18502 | [2515685 chr17 | 17 | 57683649 | 57709501 | 25853  | 57  | 0.431013  | 0.023572 | 57683473 | 57683826 | 57709158 | 57709841 |
| 626 NA18502 | [2515685 chr17 | 17 | 60333024 | 60356500 | 23477  | 19  | -0.280455 | 0.040995 | 60332770 | 60333279 | 60355098 | 60357901 |
| 627 NA18502 | [2515685 chr18 | 18 | 14132495 | 14140865 | 8371   | 13  | 0.254555  | 0.049351 | 14132172 | 14132818 | 14140676 | 14141051 |

|             |                |    |          |          |       |     |           |          |          |          |          |          |
|-------------|----------------|----|----------|----------|-------|-----|-----------|----------|----------|----------|----------|----------|
| 628 NA18502 | [2515685 chr18 | 18 | 14246928 | 14322605 | 75678 | 22  | 0.426175  | 0.037935 | 14244529 | 14249327 | 14320558 | 1432465: |
| 629 NA18502 | [2515685 chr18 | 18 | 14554804 | 14572648 | 17845 | 19  | -0.355183 | 0.040822 | 14554346 | 14555263 | 14572112 | 1457318: |
| 630 NA18502 | [2515685 chr18 | 18 | 14861121 | 14875653 | 14533 | 19  | 0.253066  | 0.040822 | 14860765 | 14861478 | 14875278 | 1487602: |
| 631 NA18502 | [2515685 chr18 | 18 | 35757666 | 35768270 | 10605 | 5   | -0.422113 | 0.079583 | 35757036 | 35758297 | 35765640 | 3577090: |
| 632 NA18502 | [2515685 chr18 | 18 | 36514289 | 36518453 | 4165  | 3   | -1.150942 | 0.11117  | 36513759 | 36514820 | 36518173 | 3651873: |
| 633 NA18502 | [2515685 chr18 | 18 | 42797012 | 42815380 | 18369 | 21  | -0.435283 | 0.038829 | 42796537 | 42797488 | 42810800 | 4288915: |
| 634 NA18502 | [2515685 chr18 | 18 | 61917747 | 61919854 | 2108  | 3   | 1.905367  | 0.133075 | 61917522 | 61917973 | 61919012 | 6192069: |
| 635 NA18502 | [2515685 chr18 | 18 | 74231104 | 74234275 | 3172  | 30  | 0.449583  | 0.032487 | 74230952 | 74231256 | 74234139 | 7423441: |
| 636 NA18502 | [2515685 chr18 | 18 | 74297715 | 74299391 | 1677  | 5   | -0.513132 | 0.079576 | 74297243 | 74298187 | 74299167 | 7429961: |
| 637 NA18502 | [2515685 chr18 | 18 | 74392800 | 74398225 | 5426  | 4   | 0.565682  | 0.097627 | 74390826 | 74394774 | 74397790 | 7439866: |
| 638 NA18502 | [2515685 chr19 | 19 | 58103    | 60766    | 2664  | 2   | 0.855903  | 0.125821 | 57927    | 58280    | 60510    | 61022    |
| 639 NA18502 | [2515685 chr19 | 19 | 274182   | 276410   | 2229  | 3   | 0.616646  | 0.102732 | 273796   | 274569   | 276173   | 276648   |
| 640 NA18502 | [2515685 chr19 | 19 | 310414   | 312953   | 2540  | 14  | -1.802313 | 0.049224 | 309687   | 311142   | 312913   | 312994   |
| 641 NA18502 | [2515685 chr19 | 19 | 1200296  | 1202522  | 2227  | 3   | 0.661151  | 0.102732 | 1199725  | 1200868  | 1202197  | 120284:  |
| 642 NA18502 | [2515685 chr19 | 19 | 15074504 | 15102751 | 28248 | 36  | 0.268567  | 0.029656 | 15073611 | 15075398 | 15102181 | 1510332: |
| 643 NA18502 | [2515685 chr19 | 19 | 22150585 | 22152298 | 1714  | 5   | -0.592303 | 0.104378 | 22150417 | 22150753 | 22152009 | 2215258: |
| 644 NA18502 | [2515685 chr19 | 19 | 22869266 | 22878458 | 9193  | 14  | 0.257603  | 0.047852 | 22869164 | 22869368 | 22877870 | 2287904: |
| 645 NA18502 | [2515685 chr19 | 19 | 22931048 | 22934541 | 3494  | 2   | 1.094863  | 0.125821 | 22918199 | 22933577 | 22934109 | 2293497: |
| 646 NA18502 | [2515685 chr19 | 19 | 23007902 | 23015569 | 7668  | 8   | 0.442289  | 0.066784 | 22990964 | 23010431 | 23015468 | 2301567: |
| 647 NA18502 | [2515685 chr19 | 19 | 23683118 | 23683893 | 776   | 2   | -0.640737 | 0.125966 | 23682751 | 23683485 | 23683673 | 2368411: |
| 648 NA18502 | [2515685 chr19 | 19 | 24146650 | 24146898 | 249   | 3   | -0.535138 | 0.104835 | 24146639 | 24146662 | 24146708 | 2414708: |
| 649 NA18502 | [2515685 chr19 | 19 | 24147818 | 24148730 | 913   | 4   | -0.784077 | 0.097858 | 24147801 | 24147835 | 24148193 | 2414926: |
| 650 NA18502 | [2515685 chr19 | 19 | 24152454 | 24155800 | 3347  | 22  | 0.349176  | 0.037936 | 24152435 | 24152473 | 24155376 | 2415622: |
| 651 NA18502 | [2515685 chr19 | 19 | 39419234 | 39422498 | 3265  | 5   | 0.517401  | 0.079576 | 39418853 | 39419616 | 39421681 | 3942331: |
| 652 NA18502 | [2515685 chr19 | 19 | 41450185 | 41493614 | 43430 | 28  | 0.508578  | 0.033626 | 41421528 | 41452714 | 41491085 | 4149785: |
| 653 NA18502 | [2515685 chr19 | 19 | 42450471 | 42487512 | 37042 | 33  | 0.568244  | 0.030974 | 42413600 | 42453000 | 42486487 | 4248853: |
| 654 NA18502 | [2515685 chr19 | 19 | 53097313 | 53154327 | 57015 | 106 | -0.582131 | 0.01728  | 53096909 | 53097718 | 53152350 | 5315630: |
| 655 NA18502 | [2515685 chr19 | 19 | 55248807 | 55253190 | 4384  | 3   | -0.962636 | 0.111422 | 55247902 | 55249712 | 55252939 | 5525344: |
| 656 NA18502 | [2515685 chr19 | 19 | 55286131 | 55336157 | 50027 | 103 | -0.600897 | 0.01753  | 55286025 | 55286237 | 55335244 | 5533707: |
| 657 NA18502 | [2515685 chr19 | 19 | 56883369 | 56896908 | 13540 | 16  | 0.30169   | 0.044484 | 56882926 | 56883813 | 56896533 | 5689728: |
| 658 NA18502 | [2515685 chr19 | 19 | 58211794 | 58244458 | 32665 | 25  | -0.735803 | 0.036403 | 58211007 | 58212582 | 58243893 | 5824502: |
| 659 NA18502 | [2515685 chr19 | 19 | 59360363 | 59367843 | 7481  | 8   | 0.350119  | 0.06291  | 59359842 | 59360885 | 59367268 | 5936841: |
| 660 NA18502 | [2515685 chr19 | 19 | 59422281 | 59435274 | 12994 | 15  | -0.467632 | 0.045991 | 59421840 | 59422722 | 59435027 | 5943552: |
| 661 NA18502 | [2515685 chr19 | 19 | 59492384 | 59498950 | 6567  | 7   | 0.477777  | 0.067415 | 59491977 | 59492791 | 59497077 | 5950082: |
| 662 NA18502 | [2515685 chr19 | 19 | 59616993 | 59625603 | 8611  | 9   | 0.369334  | 0.059312 | 59616540 | 59617447 | 59625048 | 5962615: |
| 663 NA18502 | [2515685 chr20 | 20 | 1511097  | 1532477  | 21381 | 25  | -1.606812 | 0.045854 | 1510534  | 1511660  | 1532182  | 153277:  |
| 664 NA18502 | [2515685 chr20 | 20 | 2303224  | 2304570  | 1347  | 2   | -0.745398 | 0.146526 | 2302920  | 2303529  | 2304375  | 230476:  |
| 665 NA18502 | [2515685 chr20 | 20 | 8551893  | 8558018  | 6126  | 9   | -0.359715 | 0.060848 | 8551632  | 8552155  | 8557679  | 855835:  |
| 666 NA18502 | [2515685 chr20 | 20 | 25718070 | 25723298 | 5229  | 7   | -0.348575 | 0.067254 | 25717754 | 25718386 | 25722433 | 2572416: |
| 667 NA18502 | [2515685 chr20 | 20 | 25730081 | 25735503 | 5423  | 5   | -0.514002 | 0.079576 | 25730023 | 25730139 | 25735035 | 2573597: |
| 668 NA18502 | [2515685 chr20 | 20 | 25770348 | 25771875 | 1528  | 2   | -0.711955 | 0.125821 | 25770038 | 25770658 | 25770659 | 2577309: |
| 669 NA18502 | [2515685 chr20 | 20 | 25785051 | 25799175 | 14125 | 10  | 0.331305  | 0.056269 | 25784344 | 25785759 | 25798661 | 2579968: |
| 670 NA18502 | [2515685 chr20 | 20 | 25941300 | 25942825 | 1526  | 2   | -0.711955 | 0.125821 | 25940088 | 25942512 | 25942513 | 2594313: |
| 671 NA18502 | [2515685 chr20 | 20 | 25977672 | 25983093 | 5422  | 5   | -0.514002 | 0.079576 | 25977204 | 25978140 | 25983035 | 2598315: |
| 672 NA18502 | [2515685 chr20 | 20 | 25989876 | 25995104 | 5229  | 7   | -0.348575 | 0.067254 | 25989011 | 25990742 | 25994788 | 2599542: |
| 673 NA18502 | [2515685 chr20 | 20 | 28126635 | 28149369 | 22735 | 28  | 0.25187   | 0.033627 | 28124462 | 28128809 | 28149114 | 2814962: |
| 674 NA18502 | [2515685 chr20 | 20 | 35736931 | 35738843 | 1913  | 2   | 1.103305  | 0.129004 | 35736234 | 35737629 | 35738606 | 3573908: |
| 675 NA18502 | [2515685 chr20 | 20 | 49817373 | 49819212 | 1840  | 2   | 0.970007  | 0.126069 | 49816867 | 49817880 | 49818962 | 4981946: |
| 676 NA18502 | [2515685 chr20 | 20 | 61689156 | 61699654 | 10499 | 15  | 0.320099  | 0.045943 | 61688940 | 61689372 | 61699290 | 6170001: |
| 677 NA18502 | [2515685 chr20 | 20 | 62066380 | 62068214 | 1835  | 8   | 1.304256  | 0.062908 | 62066146 | 62066615 | 62067671 | 6206875: |
| 678 NA18502 | [2515685 chr20 | 20 | 62371216 | 62373725 | 2510  | 3   | 0.621884  | 0.102732 | 62370954 | 62371479 | 62373315 | 6237413: |
| 679 NA18502 | [2515685 chr21 | 21 | 9912154  | 10007475 | 95322 | 16  | -0.263551 | 0.044484 | 9909326  | 9914982  | 10006691 | 1000825: |
| 680 NA18502 | [2515685 chr21 | 21 | 10123436 | 10131504 | 8069  | 4   | -0.5464   | 0.088969 | 10119943 | 10126929 | 10131080 | 1013192: |
| 681 NA18502 | [2515685 chr21 | 21 | 13962300 | 13968799 | 6500  | 5   | -0.451369 | 0.079576 | 13962093 | 13962508 | 13967342 | 1397025: |
| 682 NA18502 | [2515685 chr21 | 21 | 20768592 | 20772226 | 3635  | 3   | -0.530489 | 0.103808 | 20768211 | 20768974 | 20770668 | 2077378: |

|             |                |    |           |           |        |     |           |          |           |           |           |           |
|-------------|----------------|----|-----------|-----------|--------|-----|-----------|----------|-----------|-----------|-----------|-----------|
| 683 NA18502 | [2515685 chr22 | 22 | 14472220  | 14536261  | 64042  | 123 | -0.41317  | 0.006861 | 14472061  | 14472380  | 14536238  | 1453628-  |
| 684 NA18502 | [2515685 chr22 | 22 | 14542087  | 14715628  | 173542 | 320 | -0.41317  | 0.006861 | 14541593  | 14542582  | 14715499  | 1471575!  |
| 685 NA18502 | [2515685 chr22 | 22 | 14718459  | 14747237  | 28779  | 58  | -0.41317  | 0.006861 | 14717874  | 14719044  | 14746998  | 14747477  |
| 686 NA18502 | [2515685 chr22 | 22 | 14750345  | 14830910  | 80566  | 143 | -0.41317  | 0.006861 | 14750176  | 14750515  | 14830451  | 1483136!  |
| 687 NA18502 | [2515685 chr22 | 22 | 15281833  | 15335360  | 53528  | 47  | -0.308991 | 0.025957 | 15281197  | 15282470  | 15333227  | 1533749-  |
| 688 NA18502 | [2515685 chr22 | 22 | 17185238  | 17201545  | 16308  | 31  | 0.265994  | 0.031958 | 17184390  | 17186086  | 17201236  | 1720185!  |
| 689 NA18502 | [2515685 chr22 | 22 | 18233790  | 18248589  | 14800  | 7   | 0.414153  | 0.067254 | 18231898  | 18235682  | 18247887  | 1824929;  |
| 690 NA18502 | [2515685 chr22 | 22 | 19392079  | 19743926  | 351848 | 14  | -0.293498 | 0.047556 | 19391751  | 19392407  | 19742071  | 1974578;  |
| 691 NA18502 | [2515685 chr22 | 22 | 19810859  | 19830324  | 19466  | 38  | 0.254234  | 0.028865 | 19810848  | 19810870  | 19829940  | 1983070!  |
| 692 NA18502 | [2515685 chr22 | 22 | 20087548  | 20094001  | 6454   | 6   | -0.37571  | 0.072643 | 20086373  | 20088724  | 20094000  | 2009400;  |
| 693 NA18502 | [2515685 chr22 | 22 | 20198571  | 20205022  | 6452   | 7   | -0.413675 | 0.067254 | 20198570  | 20198572  | 20203846  | 2020619!  |
| 694 NA18502 | [2515685 chr22 | 22 | 22611178  | 22615116  | 3939   | 3   | -0.550118 | 0.108705 | 22609725  | 22612631  | 22614886  | 2261534   |
| 695 NA18502 | [2515685 chr22 | 22 | 22667662  | 22677557  | 9896   | 15  | 0.257524  | 0.047733 | 22667642  | 22667682  | 22677005  | 2267811!  |
| 696 NA18502 | [2515685 chr22 | 22 | 22683930  | 22690382  | 6453   | 5   | -0.641129 | 0.083942 | 22681309  | 22686552  | 22690146  | 2269061!  |
| 697 NA18502 | [2515685 chr22 | 22 | 22696636  | 22711591  | 14956  | 18  | 0.380158  | 0.048057 | 22696293  | 22696980  | 22711339  | 2271184;  |
| 698 NA18502 | [2515685 chr22 | 22 | 22721913  | 22730636  | 8724   | 12  | 0.260801  | 0.051366 | 22721893  | 22721933  | 22730101  | 2273117   |
| 699 NA18502 | [2515685 chr22 | 22 | 23998317  | 24000421  | 2105   | 2   | 0.815318  | 0.125821 | 23997167  | 23999467  | 24000076  | 2400076;  |
| 700 NA18502 | [2515685 chr22 | 22 | 33619409  | 33623490  | 4082   | 5   | 0.683596  | 0.079573 | 33618939  | 33619879  | 33622642  | 3362433!  |
| 701 NA18502 | [2515685 chr22 | 22 | 37654543  | 37662980  | 8438   | 2   | -0.794046 | 0.126695 | 37653563  | 37655524  | 37660494  | 3766546!  |
| 702 NA18502 | [2515685 chr22 | 22 | 41234451  | 41276484  | 42034  | 32  | 0.424743  | 0.031455 | 41233896  | 41235007  | 41275858  | 4127711!  |
| 703 NA18502 | [2515685 chr22 | 22 | 43912120  | 43913954  | 1835   | 3   | 0.513951  | 0.102732 | 43911825  | 43912416  | 43913682  | 4391422!  |
| 1 NA10847   | [2515685 chr1  | 1  | 403940    | 499758    | 95819  | 114 | -0.302093 | 0.009144 | 403740    | 404140    | 499532    | 499985    |
| 2 NA10847   | [2515685 chr1  | 1  | 563454    | 665490    | 102037 | 119 | -0.302093 | 0.009144 | 563228    | 563681    | 665308    | 665675    |
| 3 NA10847   | [2515685 chr1  | 1  | 1853012   | 1854645   | 1634   | 2   | 0.480073  | 0.087608 | 1852616   | 1853409   | 1853816   | 185547-   |
| 4 NA10847   | [2515685 chr1  | 1  | 10416438  | 10418311  | 1874   | 2   | -0.712569 | 0.103366 | 10415863  | 10417014  | 10417712  | 1041891   |
| 5 NA10847   | [2515685 chr1  | 1  | 12780815  | 13261958  | 481144 | 716 | 0.602663  | 0.004145 | 12780421  | 12781210  | 13261513  | 1326240;  |
| 6 NA10847   | [2515685 chr1  | 1  | 13265840  | 13277443  | 11604  | 14  | 0.602663  | 0.004145 | 13265344  | 13266337  | 13277182  | 1327770!  |
| 7 NA10847   | [2515685 chr1  | 1  | 13304610  | 13494817  | 190208 | 202 | 0.602663  | 0.004145 | 13301339  | 13352697  | 13494542  | 1349509;  |
| 8 NA10847   | [2515685 chr1  | 1  | 16975906  | 17008908  | 33003  | 35  | -0.330508 | 0.025667 | 16975406  | 16976406  | 17008393  | 1700942-  |
| 9 NA10847   | [2515685 chr1  | 1  | 25330302  | 25409301  | 79000  | 78  | 0.262271  | 0.016627 | 25329943  | 25330662  | 25408840  | 2540976;  |
| 10 NA10847  | [2515685 chr1  | 1  | 57265788  | 57269385  | 3598   | 3   | -0.367039 | 0.072919 | 57264976  | 57266601  | 57269038  | 5726973;  |
| 11 NA10847  | [2515685 chr1  | 1  | 72478372  | 72524180  | 45809  | 36  | -1.894054 | 0.040232 | 72478140  | 72478604  | 72523661  | 7252470!  |
| 12 NA10847  | [2515685 chr1  | 1  | 89188117  | 89190762  | 2646   | 5   | 1.502856  | 0.086538 | 89187764  | 89188470  | 89190458  | 8919106;  |
| 13 NA10847  | [2515685 chr1  | 1  | 94869509  | 94870854  | 1346   | 3   | 0.534512  | 0.074766 | 94869219  | 94869799  | 94870647  | 9487106   |
| 14 NA10847  | [2515685 chr1  | 1  | 103827497 | 103834166 | 6670   | 16  | 0.43426   | 0.03429  | 103827175 | 103827820 | 103833999 | 10383433- |
| 15 NA10847  | [2515685 chr1  | 1  | 103854893 | 103866317 | 11425  | 17  | 0.486261  | 0.007904 | 103854670 | 103855117 | 103865345 | 10386729  |
| 16 NA10847  | [2515685 chr1  | 1  | 103873304 | 104015739 | 142436 | 230 | 0.486261  | 0.007904 | 103873021 | 103873587 | 104013178 | 10401830  |
| 17 NA10847  | [2515685 chr1  | 1  | 104027802 | 104029695 | 1894   | 2   | 0.604369  | 0.10133  | 104027515 | 104028090 | 104028575 | 10403081  |
| 18 NA10847  | [2515685 chr1  | 1  | 108514938 | 108565175 | 50238  | 59  | 0.323667  | 0.01996  | 108514864 | 108515012 | 108565023 | 10856532  |
| 19 NA10847  | [2515685 chr1  | 1  | 108638318 | 108688767 | 50450  | 59  | 0.330186  | 0.019893 | 108638254 | 108638383 | 108688693 | 10868884  |
| 20 NA10847  | [2515685 chr1  | 1  | 109936541 | 109965726 | 29186  | 31  | 0.315811  | 0.025833 | 109935803 | 109937279 | 109965065 | 10996638  |
| 21 NA10847  | [2515685 chr1  | 1  | 141915781 | 141916644 | 864    | 3   | 0.723112  | 0.075996 | 141915140 | 141916422 | 141916449 | 14191683  |
| 22 NA10847  | [2515685 chr1  | 1  | 141967283 | 141975681 | 8399   | 27  | 0.367693  | 0.022641 | 141967011 | 141967556 | 141975633 | 14197573  |
| 23 NA10847  | [2515685 chr1  | 1  | 142096128 | 142096822 | 695    | 2   | 0.681175  | 0.084615 | 142095585 | 142096671 | 142096672 | 14209697  |
| 24 NA10847  | [2515685 chr1  | 1  | 142438646 | 142569435 | 130790 | 159 | 0.331123  | 0.011565 | 142438189 | 142439104 | 142568775 | 14257009  |
| 25 NA10847  | [2515685 chr1  | 1  | 142744385 | 142745273 | 889    | 2   | 0.713377  | 0.116724 | 142743794 | 142744976 | 142745023 | 14274552  |
| 26 NA10847  | [2515685 chr1  | 1  | 145044635 | 145045386 | 752    | 2   | 0.681174  | 0.084615 | 145044092 | 145045178 | 145045179 | 14504559  |
| 27 NA10847  | [2515685 chr1  | 1  | 145095961 | 145104402 | 8442   | 25  | 0.370079  | 0.023553 | 145095646 | 145096276 | 145104354 | 14510445  |
| 28 NA10847  | [2515685 chr1  | 1  | 145397658 | 145398426 | 769    | 2   | 0.573315  | 0.073054 | 145397226 | 145398090 | 145398111 | 14539874  |
| 29 NA10847  | [2515685 chr1  | 1  | 145558689 | 145560454 | 1766   | 3   | 0.539682  | 0.066302 | 145558089 | 145559289 | 145560139 | 14556076  |
| 30 NA10847  | [2515685 chr1  | 1  | 145819541 | 145821079 | 1539   | 2   | 0.702382  | 0.103911 | 145819262 | 145819821 | 145820633 | 14582152  |
| 31 NA10847  | [2515685 chr1  | 1  | 145930102 | 145951531 | 21430  | 24  | 0.373265  | 0.030499 | 145929732 | 145930472 | 145951467 | 14595159  |
| 32 NA10847  | [2515685 chr1  | 1  | 146331954 | 146340401 | 8448   | 25  | 0.369297  | 0.02423  | 146331906 | 146332002 | 146340086 | 14634071  |
| 33 NA10847  | [2515685 chr1  | 1  | 146391020 | 146391476 | 457    | 2   | 0.681173  | 0.084615 | 146390812 | 146391228 | 146391229 | 14639172- |
| 34 NA10847  | [2515685 chr1  | 1  | 146564784 | 146566576 | 1793   | 4   | 0.427755  | 0.064162 | 146564394 | 146565174 | 146566510 | 14656664  |

|            |               |   |           |           |        |     |           |          |           |           |           |          |
|------------|---------------|---|-----------|-----------|--------|-----|-----------|----------|-----------|-----------|-----------|----------|
| 35 NA10847 | [2515685 chr1 | 1 | 148998878 | 149005918 | 7041   | 13  | 0.405004  | 0.03146  | 148998401 | 148999355 | 149004680 | 14900715 |
| 36 NA10847 | [2515685 chr1 | 1 | 149368571 | 149385742 | 17172  | 3   | -0.547669 | 0.086805 | 149368105 | 149369038 | 149385339 | 14938614 |
| 37 NA10847 | [2515685 chr1 | 1 | 149385742 | 149399435 | 13694  | 19  | -1.806662 | 0.051479 | 149385339 | 149386145 | 149399080 | 14939979 |
| 38 NA10847 | [2515685 chr1 | 1 | 149573821 | 149583431 | 9611   | 5   | 0.869316  | 0.076785 | 149573460 | 149574182 | 149582912 | 14958395 |
| 39 NA10847 | [2515685 chr1 | 1 | 193448820 | 193555075 | 106256 | 89  | 0.396557  | 0.016275 | 193448631 | 193449010 | 193554890 | 19355526 |
| 40 NA10847 | [2515685 chr1 | 1 | 209390853 | 209402508 | 11656  | 9   | -0.703075 | 0.055293 | 209390492 | 209391215 | 209401777 | 20940323 |
| 41 NA10847 | [2515685 chr1 | 1 | 218762650 | 218771442 | 8793   | 8   | -0.523722 | 0.057417 | 218762212 | 218763089 | 218771135 | 21877175 |
| 42 NA10847 | [2515685 chr1 | 1 | 233202665 | 233204956 | 2292   | 42  | 0.396631  | 0.018813 | 233202312 | 233203018 | 233204364 | 23320554 |
| 43 NA10847 | [2515685 chr1 | 1 | 234429837 | 234434986 | 5150   | 6   | -0.297311 | 0.058678 | 234429641 | 234430034 | 234434147 | 23443582 |
| 44 NA10847 | [2515685 chr1 | 1 | 236719047 | 236720968 | 1922   | 3   | -0.868891 | 0.089365 | 236718751 | 236719344 | 236720749 | 23672118 |
| 45 NA10847 | [2515685 chr1 | 1 | 239368545 | 239498531 | 129987 | 15  | -0.410408 | 0.039535 | 239368239 | 239368851 | 239496181 | 23950088 |
| 46 NA10847 | [2515685 chr2 | 2 | 296456    | 298925    | 2470   | 8   | -0.759054 | 0.056031 | 296213    | 296699    | 298661    | 299185   |
| 47 NA10847 | [2515685 chr2 | 2 | 34606444  | 34641571  | 35128  | 38  | 0.73443   | 0.025162 | 34601818  | 34609397  | 34641330  | 3464181  |
| 48 NA10847 | [2515685 chr2 | 2 | 35896477  | 35905932  | 9456   | 3   | -0.819523 | 0.085091 | 35879425  | 35899430  | 35902979  | 3590982  |
| 49 NA10847 | [2515685 chr2 | 2 | 37869648  | 37911473  | 41826  | 43  | 0.325682  | 0.021631 | 37869077  | 37870220  | 37911214  | 3791173  |
| 50 NA10847 | [2515685 chr2 | 2 | 44378695  | 44380701  | 2007   | 3   | -0.821105 | 0.080987 | 44378636  | 44378754  | 44379703  | 4438169  |
| 51 NA10847 | [2515685 chr2 | 2 | 46580020  | 46654606  | 74587  | 68  | -0.733586 | 0.018559 | 46579757  | 46580284  | 46651822  | 4665739  |
| 52 NA10847 | [2515685 chr2 | 2 | 51838213  | 51839736  | 1524   | 3   | -0.847839 | 0.101248 | 51838197  | 51838229  | 51839379  | 5184009  |
| 53 NA10847 | [2515685 chr2 | 2 | 56563624  | 56567381  | 3758   | 2   | 2.528517  | 0.187936 | 56556559  | 56566577  | 56567035  | 5656772  |
| 54 NA10847 | [2515685 chr2 | 2 | 61675589  | 61676777  | 1189   | 2   | 0.75038   | 0.118308 | 61675200  | 61675979  | 61676468  | 6167708  |
| 55 NA10847 | [2515685 chr2 | 2 | 73921778  | 73925487  | 3710   | 7   | 0.357003  | 0.04436  | 73921335  | 73922222  | 73925419  | 7392555  |
| 56 NA10847 | [2515685 chr2 | 2 | 73925784  | 73945080  | 19297  | 28  | 0.394981  | 0.018906 | 73925556  | 73926013  | 73945012  | 7394514  |
| 57 NA10847 | [2515685 chr2 | 2 | 73945377  | 73946969  | 1593   | 3   | 0.509057  | 0.064899 | 73945149  | 73945606  | 73946724  | 7394721  |
| 58 NA10847 | [2515685 chr2 | 2 | 75296507  | 75298934  | 2428   | 2   | 0.553882  | 0.105312 | 75296056  | 75296959  | 75298532  | 7529933  |
| 59 NA10847 | [2515685 chr2 | 2 | 97184386  | 97189735  | 5350   | 2   | -0.774767 | 0.104562 | 97182781  | 97185992  | 97186782  | 9719672  |
| 60 NA10847 | [2515685 chr2 | 2 | 97613796  | 97614932  | 1137   | 2   | 0.975337  | 0.125793 | 97613553  | 97614040  | 97614467  | 9761539  |
| 61 NA10847 | [2515685 chr2 | 2 | 106339466 | 106344320 | 4855   | 6   | -0.61583  | 0.068784 | 106339069 | 106339864 | 106344055 | 10634458 |
| 62 NA10847 | [2515685 chr2 | 2 | 108313968 | 108314875 | 908    | 2   | 0.68471   | 0.112746 | 108313664 | 108314272 | 108314680 | 10831507 |
| 63 NA10847 | [2515685 chr2 | 2 | 123193457 | 123198547 | 5091   | 4   | -0.810942 | 0.074642 | 123193121 | 123193793 | 123198337 | 12319875 |
| 64 NA10847 | [2515685 chr2 | 2 | 129354604 | 129360182 | 5579   | 4   | -1.184029 | 0.090075 | 129354317 | 129354892 | 129357659 | 12936270 |
| 65 NA10847 | [2515685 chr2 | 2 | 130410671 | 130464577 | 53907  | 57  | -0.286774 | 0.019268 | 130410236 | 130411106 | 130464333 | 13046482 |
| 66 NA10847 | [2515685 chr2 | 2 | 131030773 | 131037575 | 6803   | 14  | -0.287051 | 0.037511 | 131030629 | 131030917 | 131037431 | 13103771 |
| 67 NA10847 | [2515685 chr2 | 2 | 131952094 | 131953962 | 1869   | 3   | -0.645449 | 0.093185 | 131951874 | 131952315 | 131953571 | 13195435 |
| 68 NA10847 | [2515685 chr2 | 2 | 132272745 | 132323964 | 51220  | 59  | -0.268723 | 0.018455 | 132271619 | 132273872 | 132323290 | 13232463 |
| 69 NA10847 | [2515685 chr2 | 2 | 132846945 | 132873598 | 26654  | 21  | 0.313605  | 0.032556 | 132846760 | 132847131 | 132873312 | 13287388 |
| 70 NA10847 | [2515685 chr2 | 2 | 146694145 | 146710744 | 16600  | 16  | 0.799914  | 0.042685 | 146688620 | 146697098 | 146710557 | 14671093 |
| 71 NA10847 | [2515685 chr2 | 2 | 153495550 | 153499409 | 3860   | 2   | 0.722381  | 0.120449 | 153484545 | 153498503 | 153498846 | 15349997 |
| 72 NA10847 | [2515685 chr2 | 2 | 153622711 | 153625256 | 2546   | 3   | 0.91689   | 0.114793 | 153621175 | 153624247 | 153625088 | 15362542 |
| 73 NA10847 | [2515685 chr2 | 2 | 195804965 | 195809805 | 4841   | 5   | -0.572655 | 0.068994 | 195803577 | 195806354 | 195809355 | 19581025 |
| 74 NA10847 | [2515685 chr2 | 2 | 232512469 | 232537143 | 24675  | 6   | -0.307968 | 0.042839 | 232511142 | 232513796 | 232534243 | 23254004 |
| 75 NA10847 | [2515685 chr2 | 2 | 242664580 | 242668683 | 4104   | 10  | 1.267162  | 0.041015 | 242664284 | 242664877 | 242668532 | 24266883 |
| 76 NA10847 | [2515685 chr3 | 3 | 1757211   | 1765706   | 8496   | 2   | 0.849842  | 0.117776 | 1756096   | 1758327   | 1762058   | 179730   |
| 77 NA10847 | [2515685 chr3 | 3 | 4264054   | 4265484   | 1431   | 2   | 0.594373  | 0.114214 | 4263741   | 4264368   | 4265172   | 426579   |
| 78 NA10847 | [2515685 chr3 | 3 | 42350188  | 42351717  | 1530   | 3   | 0.529011  | 0.083855 | 42349839  | 42350537  | 42351490  | 4235194  |
| 79 NA10847 | [2515685 chr3 | 3 | 75841826  | 75879753  | 37928  | 20  | 0.307094  | 0.030296 | 75836910  | 75845474  | 75876105  | 7589177  |
| 80 NA10847 | [2515685 chr3 | 3 | 76066312  | 76081451  | 15140  | 19  | -0.354221 | 0.033236 | 76065787  | 76066838  | 76081180  | 7608172  |
| 81 NA10847 | [2515685 chr3 | 3 | 104887176 | 104897963 | 10788  | 10  | 0.255785  | 0.046296 | 104886557 | 104887795 | 104897737 | 10489819 |
| 82 NA10847 | [2515685 chr3 | 3 | 105760262 | 105762355 | 2094   | 2   | -0.960383 | 0.123077 | 105759634 | 105760890 | 105761424 | 10576328 |
| 83 NA10847 | [2515685 chr3 | 3 | 156042614 | 156043843 | 1230   | 2   | -0.54395  | 0.106369 | 156042074 | 156043154 | 156043483 | 15604420 |
| 84 NA10847 | [2515685 chr3 | 3 | 163994592 | 164106273 | 111682 | 104 | 2.749785  | 0.026708 | 163993392 | 163995793 | 164106029 | 16410651 |
| 85 NA10847 | [2515685 chr3 | 3 | 164200660 | 164205886 | 5227   | 5   | -0.749649 | 0.079279 | 164200187 | 164201133 | 164204674 | 16420709 |
| 86 NA10847 | [2515685 chr3 | 3 | 165151155 | 165154150 | 2996   | 4   | 0.415843  | 0.081774 | 165150929 | 165151382 | 165152920 | 16515538 |
| 87 NA10847 | [2515685 chr3 | 3 | 192547312 | 192554331 | 7020   | 10  | 0.79302   | 0.051695 | 192546950 | 192547674 | 192554127 | 19255453 |
| 88 NA10847 | [2515685 chr3 | 3 | 196648697 | 196651596 | 2900   | 3   | -0.59839  | 0.094814 | 196648236 | 196649158 | 196651306 | 19665188 |
| 89 NA10847 | [2515685 chr3 | 3 | 196890223 | 196965802 | 75580  | 78  | -0.323036 | 0.01692  | 196889875 | 196890572 | 196965494 | 19696611 |



|             |               |   |           |           |        |     |           |          |           |           |           |          |
|-------------|---------------|---|-----------|-----------|--------|-----|-----------|----------|-----------|-----------|-----------|----------|
| 90 NA10847  | [2515685 chr3 | 3 | 196994475 | 197002965 | 8491   | 10  | 0.837632  | 0.046507 | 196994054 | 196994896 | 197002044 | 19700388 |
| 91 NA10847  | [2515685 chr3 | 3 | 197267244 | 197268267 | 1024   | 2   | -0.576834 | 0.10836  | 197267046 | 197267442 | 197267957 | 19726857 |
| 92 NA10847  | [2515685 chr3 | 3 | 197437666 | 197440007 | 2342   | 3   | -1.137382 | 0.097775 | 197437333 | 197437999 | 197439532 | 19744048 |
| 93 NA10847  | [2515685 chr3 | 3 | 198421889 | 198427408 | 5520   | 3   | 0.682615  | 0.089013 | 198421397 | 198422381 | 198423959 | 19843085 |
| 94 NA10847  | [2515685 chr3 | 3 | 198674426 | 198675470 | 1045   | 6   | -0.563187 | 0.050859 | 198674161 | 198674692 | 198674903 | 19867603 |
| 95 NA10847  | [2515685 chr3 | 3 | 199218619 | 199221999 | 3381   | 12  | -0.525483 | 0.047878 | 199218354 | 199218884 | 199220440 | 19922355 |
| 96 NA10847  | [2515685 chr3 | 3 | 199313925 | 199321063 | 7139   | 15  | 1.533338  | 0.031565 | 199313515 | 199314336 | 199320844 | 19932128 |
| 97 NA10847  | [2515685 chr4 | 4 | 8740725   | 8756949   | 16225  | 24  | 0.448294  | 0.021506 | 8740586   | 8740864   | 8756813   | 8757081  |
| 98 NA10847  | [2515685 chr4 | 4 | 8998177   | 9046719   | 48543  | 87  | 0.870896  | 0.011312 | 8850774   | 9001243   | 9046129   | 9047301  |
| 99 NA10847  | [2515685 chr4 | 4 | 9812346   | 9813108   | 763    | 33  | 0.825406  | 0.019697 | 9812284   | 9812408   | 9812952   | 9813261  |
| 100 NA10847 | [2515685 chr4 | 4 | 33200574  | 33201715  | 1142   | 2   | 0.588733  | 0.115687 | 33200322  | 33200826  | 33201357  | 3320207  |
| 101 NA10847 | [2515685 chr4 | 4 | 44806874  | 44846959  | 40086  | 46  | 0.802181  | 0.022686 | 44806206  | 44807543  | 44846702  | 44847211 |
| 102 NA10847 | [2515685 chr4 | 4 | 63500374  | 63504889  | 4516   | 5   | -0.945729 | 0.090331 | 63494261  | 63503440  | 63504639  | 63505141 |
| 103 NA10847 | [2515685 chr4 | 4 | 64522941  | 64543857  | 20917  | 20  | -0.766191 | 0.039408 | 64522682  | 64523201  | 64542552  | 6454516  |
| 104 NA10847 | [2515685 chr4 | 4 | 69202095  | 69365270  | 163176 | 116 | 0.870321  | 0.014452 | 69201955  | 69202236  | 69365129  | 6936541  |
| 105 NA10847 | [2515685 chr4 | 4 | 69671789  | 69717280  | 45492  | 53  | 0.516381  | 0.017562 | 69671604  | 69671975  | 69717139  | 6971742  |
| 106 NA10847 | [2515685 chr4 | 4 | 70277422  | 70418701  | 141280 | 146 | 0.351384  | 0.012879 | 70277174  | 70277671  | 70418467  | 7041793  |
| 107 NA10847 | [2515685 chr4 | 4 | 87333407  | 87337560  | 4154   | 4   | -0.784038 | 0.082226 | 87333057  | 87333758  | 87337055  | 8733806  |
| 108 NA10847 | [2515685 chr4 | 4 | 125304905 | 125305983 | 1079   | 2   | 0.646995  | 0.108006 | 125304587 | 125305223 | 125305732 | 12530623 |
| 109 NA10847 | [2515685 chr4 | 4 | 138449561 | 138457787 | 8227   | 7   | -0.916821 | 0.062107 | 138448993 | 138450130 | 138457283 | 13845829 |
| 110 NA10847 | [2515685 chr4 | 4 | 138537751 | 138549906 | 12156  | 14  | 0.813432  | 0.047036 | 138537443 | 138538059 | 138547414 | 13855239 |
| 111 NA10847 | [2515685 chr4 | 4 | 142588136 | 142590500 | 2365   | 4   | -1.655256 | 0.100851 | 142587774 | 142588498 | 142590303 | 14259069 |
| 112 NA10847 | [2515685 chr4 | 4 | 145240980 | 145245588 | 4609   | 4   | -0.530205 | 0.08565  | 145240473 | 145241488 | 145245192 | 14524598 |
| 113 NA10847 | [2515685 chr4 | 4 | 162237272 | 162242562 | 5291   | 8   | 0.785301  | 0.057263 | 162236487 | 162238058 | 162242381 | 16224274 |
| 114 NA10847 | [2515685 chr4 | 4 | 162806038 | 162809269 | 3232   | 3   | 0.69013   | 0.087711 | 162804872 | 162807204 | 162808734 | 16280980 |
| 115 NA10847 | [2515685 chr4 | 4 | 169184442 | 169368370 | 183929 | 162 | 0.709201  | 0.012522 | 169184090 | 169184794 | 169366713 | 16937002 |
| 116 NA10847 | [2515685 chr4 | 4 | 172750241 | 172755216 | 4976   | 2   | 1.040601  | 0.135994 | 172748887 | 172751596 | 172753256 | 17275717 |
| 117 NA10847 | [2515685 chr4 | 4 | 173363594 | 173367718 | 4125   | 6   | -0.80247  | 0.065002 | 173362583 | 173364606 | 173367283 | 17336815 |
| 118 NA10847 | [2515685 chr4 | 4 | 185533276 | 185534552 | 1277   | 2   | 0.867751  | 0.130648 | 185532696 | 185533857 | 185534150 | 18553495 |
| 119 NA10847 | [2515685 chr4 | 4 | 185535274 | 185544849 | 9576   | 9   | 0.958885  | 0.053263 | 185534955 | 185535593 | 185543276 | 18554642 |
| 120 NA10847 | [2515685 chr4 | 4 | 187728494 | 187732907 | 4414   | 15  | 2.465669  | 0.057104 | 187728193 | 187728795 | 187732541 | 18773327 |
| 121 NA10847 | [2515685 chr4 | 4 | 190528602 | 190533163 | 4562   | 21  | -0.545279 | 0.031791 | 190528058 | 190529146 | 190531664 | 19053466 |
| 122 NA10847 | [2515685 chr5 | 5 | 810517    | 820048    | 9532   | 12  | 0.365352  | 0.045199 | 809997    | 811038    | 819824    | 820272   |
| 123 NA10847 | [2515685 chr5 | 5 | 1075284   | 1079920   | 4637   | 24  | 0.512642  | 0.027776 | 1074709   | 1075859   | 1079566   | 1080271  |
| 124 NA10847 | [2515685 chr5 | 5 | 1223248   | 1223930   | 683    | 5   | 0.325447  | 0.056345 | 1223057   | 1223439   | 1223854   | 1224007  |
| 125 NA10847 | [2515685 chr5 | 5 | 1231558   | 1233247   | 1690   | 2   | -0.862476 | 0.101863 | 1231167   | 1231949   | 1232879   | 1233611  |
| 126 NA10847 | [2515685 chr5 | 5 | 8754941   | 8802041   | 47101  | 47  | -0.807408 | 0.023885 | 8753828   | 8756055   | 8801659   | 8802424  |
| 127 NA10847 | [2515685 chr5 | 5 | 12863961  | 12873512  | 9552   | 14  | -0.746    | 0.046786 | 12863778  | 12864144  | 12873198  | 1287382  |
| 128 NA10847 | [2515685 chr5 | 5 | 17570617  | 17643104  | 72488  | 331 | -0.485072 | 0.006316 | 17570551  | 17570684  | 17642455  | 1764375  |
| 129 NA10847 | [2515685 chr5 | 5 | 17663728  | 17667407  | 3680   | 8   | -0.399164 | 0.044792 | 17663473  | 17663984  | 17667174  | 1766764  |
| 130 NA10847 | [2515685 chr5 | 5 | 19410747  | 19412172  | 1426   | 3   | 0.608698  | 0.090508 | 19410189  | 19411305  | 19411980  | 1941236  |
| 131 NA10847 | [2515685 chr5 | 5 | 21307535  | 21426153  | 118619 | 183 | 0.287024  | 0.009463 | 21307127  | 21307943  | 21425562  | 2142674  |
| 132 NA10847 | [2515685 chr5 | 5 | 21483394  | 21488147  | 4754   | 4   | -0.660837 | 0.075957 | 21480817  | 21485972  | 21487855  | 2148843  |
| 133 NA10847 | [2515685 chr5 | 5 | 21648264  | 21651681  | 3418   | 2   | -0.680891 | 0.121459 | 21647099  | 21649430  | 21650550  | 2165281  |
| 134 NA10847 | [2515685 chr5 | 5 | 21971730  | 21994547  | 22818  | 37  | 0.309432  | 0.020633 | 21971258  | 21972202  | 21992709  | 2199638  |
| 135 NA10847 | [2515685 chr5 | 5 | 22161042  | 22166982  | 5941   | 8   | 0.292048  | 0.055177 | 22160580  | 22161504  | 22166620  | 2216734  |
| 136 NA10847 | [2515685 chr5 | 5 | 34230043  | 34292673  | 62631  | 109 | 0.272957  | 0.011707 | 34229790  | 34230297  | 34291585  | 3429376  |
| 137 NA10847 | [2515685 chr5 | 5 | 68865703  | 68889446  | 23744  | 53  | 0.366216  | 0.02103  | 68865630  | 68865776  | 68889242  | 6888965  |
| 138 NA10847 | [2515685 chr5 | 5 | 68996098  | 68998099  | 2002   | 3   | 0.740676  | 0.064411 | 68995009  | 68997187  | 68997267  | 6899893  |
| 139 NA10847 | [2515685 chr5 | 5 | 69008668  | 69010082  | 1415   | 4   | 0.457344  | 0.04996  | 69008430  | 69008906  | 69009873  | 6901029  |
| 140 NA10847 | [2515685 chr5 | 5 | 69042179  | 69176244  | 134066 | 328 | 0.3494    | 0.006213 | 69041458  | 69042901  | 69175526  | 6917696  |
| 141 NA10847 | [2515685 chr5 | 5 | 69207544  | 69208959  | 1416   | 4   | 0.457343  | 0.04996  | 69207335  | 69207754  | 69208721  | 6920919  |
| 142 NA10847 | [2515685 chr5 | 5 | 69218253  | 69220263  | 2011   | 3   | 0.742684  | 0.065219 | 69217421  | 69219085  | 69219163  | 6922136  |
| 143 NA10847 | [2515685 chr5 | 5 | 69279603  | 69281256  | 1654   | 5   | 0.450351  | 0.044408 | 69279238  | 69279968  | 69281011  | 6928150  |
| 144 NA10847 | [2515685 chr5 | 5 | 69366916  | 69372462  | 5547   | 6   | 0.482887  | 0.051577 | 69366371  | 69367462  | 69371968  | 6937295  |

|             |               |   |           |           |        |     |           |          |           |           |           |           |
|-------------|---------------|---|-----------|-----------|--------|-----|-----------|----------|-----------|-----------|-----------|-----------|
| 145 NA10847 | [2515685 chr5 | 5 | 69388384  | 69411352  | 22969  | 27  | 0.403703  | 0.021368 | 69386439  | 69390329  | 69410702  | 6941200:  |
| 146 NA10847 | [2515685 chr5 | 5 | 69487853  | 69491863  | 4011   | 4   | 0.52074   | 0.06098  | 69487673  | 69488033  | 69488961  | 69494761  |
| 147 NA10847 | [2515685 chr5 | 5 | 69499933  | 69501711  | 1779   | 6   | 0.459072  | 0.042556 | 69499810  | 69500056  | 69501346  | 69502071  |
| 148 NA10847 | [2515685 chr5 | 5 | 69575839  | 69577840  | 2002   | 3   | 0.740676  | 0.064411 | 69574750  | 69576928  | 69577008  | 6957867:  |
| 149 NA10847 | [2515685 chr5 | 5 | 69588405  | 69589819  | 1415   | 5   | 0.439802  | 0.047155 | 69588167  | 69588643  | 69589610  | 6959002:  |
| 150 NA10847 | [2515685 chr5 | 5 | 69621911  | 69744382  | 122472 | 281 | 0.351094  | 0.006731 | 69621190  | 69622633  | 69744181  | 6974458:  |
| 151 NA10847 | [2515685 chr5 | 5 | 69872215  | 69874210  | 1996   | 3   | 0.740676  | 0.064411 | 69871126  | 69873304  | 69873384  | 69875031  |
| 152 NA10847 | [2515685 chr5 | 5 | 69884741  | 69886155  | 1415   | 4   | 0.457344  | 0.04996  | 69884503  | 69884979  | 69885946  | 6988636:  |
| 153 NA10847 | [2515685 chr5 | 5 | 69917451  | 70051360  | 133910 | 309 | 0.339922  | 0.006356 | 69916733  | 69918169  | 70050639  | 7005208:  |
| 154 NA10847 | [2515685 chr5 | 5 | 70083457  | 70084872  | 1416   | 4   | 0.457343  | 0.04996  | 70083248  | 70083667  | 70084634  | 7008511:  |
| 155 NA10847 | [2515685 chr5 | 5 | 70094135  | 70096145  | 2011   | 3   | 0.742684  | 0.065219 | 70093303  | 70094967  | 70095045  | 7009724:  |
| 156 NA10847 | [2515685 chr5 | 5 | 70144831  | 70159076  | 14246  | 27  | 0.313543  | 0.021141 | 70144530  | 70145132  | 70158599  | 7015955:  |
| 157 NA10847 | [2515685 chr5 | 5 | 70234358  | 70290648  | 56291  | 52  | 0.359934  | 0.016145 | 70233958  | 70234758  | 70287456  | 7029491:  |
| 158 NA10847 | [2515685 chr5 | 5 | 70367409  | 70395110  | 27702  | 37  | 0.271843  | 0.02234  | 70367348  | 70367470  | 70393351  | 7039687:  |
| 159 NA10847 | [2515685 chr5 | 5 | 70402640  | 70415506  | 12867  | 26  | 0.389375  | 0.022052 | 70402418  | 70402863  | 70415389  | 7041562:  |
| 160 NA10847 | [2515685 chr5 | 5 | 70417349  | 70426554  | 9206   | 16  | 0.389375  | 0.022052 | 70416846  | 70417852  | 70425419  | 7042768:  |
| 161 NA10847 | [2515685 chr5 | 5 | 70487867  | 70511908  | 24042  | 42  | 0.311904  | 0.017567 | 70487748  | 70487987  | 70511607  | 7051221:  |
| 162 NA10847 | [2515685 chr5 | 5 | 70576177  | 70578172  | 1996   | 3   | 0.740676  | 0.064411 | 70575088  | 70577266  | 70577346  | 7057899:  |
| 163 NA10847 | [2515685 chr5 | 5 | 70588713  | 70590127  | 1415   | 4   | 0.457344  | 0.04996  | 70588475  | 70588951  | 70589918  | 7059033:  |
| 164 NA10847 | [2515685 chr5 | 5 | 70621430  | 70689393  | 67964  | 157 | 0.33743   | 0.008996 | 70620709  | 70622152  | 70688907  | 7068987:  |
| 165 NA10847 | [2515685 chr5 | 5 | 79982063  | 79984314  | 2252   | 2   | -0.604932 | 0.095936 | 79981555  | 79982572  | 79983998  | 7998463:  |
| 166 NA10847 | [2515685 chr5 | 5 | 81459213  | 81466055  | 6843   | 2   | -1.287955 | 0.119363 | 81455614  | 81462405  | 81462863  | 8147028:  |
| 167 NA10847 | [2515685 chr5 | 5 | 93928460  | 93933101  | 4642   | 4   | -0.536877 | 0.079378 | 93927706  | 93929215  | 93931984  | 9393421:  |
| 168 NA10847 | [2515685 chr5 | 5 | 99409393  | 99419037  | 9645   | 13  | -0.729763 | 0.042456 | 99408997  | 99409789  | 99418328  | 9941974:  |
| 169 NA10847 | [2515685 chr5 | 5 | 137835848 | 137844134 | 8287   | 7   | 0.440591  | 0.060344 | 137835611 | 137836085 | 137843310 | 13784495: |
| 170 NA10847 | [2515685 chr5 | 5 | 140203081 | 140218928 | 15848  | 20  | 1.845483  | 0.049475 | 140202344 | 140203819 | 140218508 | 14021934: |
| 171 NA10847 | [2515685 chr5 | 5 | 140534849 | 140540106 | 5258   | 5   | 1.028455  | 0.072812 | 140534700 | 140534999 | 140539007 | 14054120: |
| 172 NA10847 | [2515685 chr5 | 5 | 155408303 | 155424011 | 15709  | 11  | -0.761712 | 0.051721 | 155405622 | 155410984 | 155420819 | 15542761: |
| 173 NA10847 | [2515685 chr5 | 5 | 175392637 | 175393797 | 1161   | 6   | -0.341648 | 0.064973 | 175392088 | 175393187 | 175393522 | 17539407: |
| 174 NA10847 | [2515685 chr5 | 5 | 180309823 | 180363417 | 53595  | 51  | -0.847653 | 0.024946 | 180309690 | 180309956 | 180363120 | 18036371: |
| 175 NA10847 | [2515685 chr5 | 5 | 180724710 | 180820838 | 96129  | 112 | -0.294377 | 0.013841 | 180724568 | 180724852 | 180820785 | 18082089: |
| 176 NA10847 | [2515685 chr6 | 6 | 201823    | 327656    | 125834 | 128 | 0.341984  | 0.012709 | 201415    | 202232    | 326993    | 32832:    |
| 177 NA10847 | [2515685 chr6 | 6 | 26976094  | 27078178  | 102085 | 160 | 0.251515  | 0.010085 | 26975842  | 26976347  | 27077814  | 2707854:  |
| 178 NA10847 | [2515685 chr6 | 6 | 29958572  | 30011802  | 53231  | 50  | 0.456348  | 0.021715 | 29957670  | 29959474  | 30011083  | 3001252:  |
| 179 NA10847 | [2515685 chr6 | 6 | 31387065  | 31419859  | 32795  | 16  | -0.632902 | 0.038535 | 31386395  | 31387736  | 31418034  | 3142168:  |
| 180 NA10847 | [2515685 chr6 | 6 | 32590831  | 32591649  | 819    | 2   | -2.692126 | 0.160024 | 32590576  | 32591086  | 32591403  | 3259189:  |
| 181 NA10847 | [2515685 chr6 | 6 | 32598573  | 32628234  | 29662  | 20  | -0.482613 | 0.035272 | 32598133  | 32599013  | 32627886  | 3262858:  |
| 182 NA10847 | [2515685 chr6 | 6 | 32630637  | 32707706  | 77070  | 78  | 0.296107  | 0.013783 | 32630364  | 32630911  | 32707455  | 3270795:  |
| 183 NA10847 | [2515685 chr6 | 6 | 32712337  | 32763261  | 50925  | 49  | 0.296107  | 0.013783 | 32712193  | 32712482  | 32763101  | 3276342:  |
| 184 NA10847 | [2515685 chr6 | 6 | 32766771  | 32771943  | 5173   | 3   | -0.764395 | 0.096098 | 32766412  | 32767130  | 32771753  | 3277213:  |
| 185 NA10847 | [2515685 chr6 | 6 | 35862833  | 35874426  | 11594  | 13  | 0.44716   | 0.03968  | 35862530  | 35863136  | 35873957  | 3587489:  |
| 186 NA10847 | [2515685 chr6 | 6 | 68407620  | 68408973  | 1354   | 2   | 0.816344  | 0.148248 | 68407338  | 68407903  | 68408581  | 6840936:  |
| 187 NA10847 | [2515685 chr6 | 6 | 74648985  | 74658750  | 9766   | 11  | -0.681688 | 0.046505 | 74648748  | 74649222  | 74655247  | 7466226:  |
| 188 NA10847 | [2515685 chr6 | 6 | 77495034  | 77513514  | 18481  | 12  | 0.74415   | 0.047005 | 77493568  | 77496500  | 77510011  | 7751769:  |
| 189 NA10847 | [2515685 chr6 | 6 | 95345535  | 95349338  | 3804   | 5   | -0.91425  | 0.07541  | 95345072  | 95345998  | 95348106  | 9535057:  |
| 190 NA10847 | [2515685 chr6 | 6 | 103844685 | 103871201 | 26517  | 16  | 2.108877  | 0.063238 | 103844347 | 103845023 | 103868241 | 10387416: |
| 191 NA10847 | [2515685 chr6 | 6 | 120671191 | 120671916 | 726    | 2   | 1.241378  | 0.113455 | 120670696 | 120671686 | 120671725 | 12067210: |
| 192 NA10847 | [2515685 chr6 | 6 | 143998763 | 144001320 | 2558   | 2   | 0.544591  | 0.100801 | 143997938 | 143999589 | 144000924 | 14400171: |
| 193 NA10847 | [2515685 chr6 | 6 | 160056728 | 160058998 | 2271   | 2   | -0.887703 | 0.088638 | 160055808 | 160057648 | 160058322 | 16005967: |
| 194 NA10847 | [2515685 chr6 | 6 | 161001907 | 161038394 | 36488  | 62  | 0.534114  | 0.013411 | 161001167 | 161002648 | 161038184 | 16103860: |
| 195 NA10847 | [2515685 chr6 | 6 | 170603879 | 170604666 | 788    | 2   | -2.306784 | 0.137849 | 170603541 | 170604217 | 170604339 | 17060499: |
| 196 NA10847 | [2515685 chr6 | 6 | 170625506 | 170627028 | 1523   | 3   | 2.075184  | 0.125967 | 170625015 | 170625997 | 170626579 | 17062747: |
| 197 NA10847 | [2515685 chr6 | 6 | 170684555 | 170687261 | 2707   | 6   | -0.551027 | 0.061293 | 170684170 | 170684940 | 170686870 | 17068765: |
| 198 NA10847 | [2515685 chr6 | 6 | 170862844 | 170961492 | 98649  | 98  | -0.280539 | 0.014531 | 170862775 | 170862914 | 170961439 | 17096154: |
| 199 NA10847 | [2515685 chr7 | 7 | 113212    | 116281    | 3070   | 13  | -0.355936 | 0.043904 | 113146    | 113279    | 116273    | 11629:    |

|             |               |   |           |           |        |     |           |          |           |           |           |           |
|-------------|---------------|---|-----------|-----------|--------|-----|-----------|----------|-----------|-----------|-----------|-----------|
| 200 NA10847 | [2515685 chr7 | 7 | 929017    | 930663    | 1647   | 5   | 0.352011  | 0.067307 | 928626    | 929408    | 930382    | 930945    |
| 201 NA10847 | [2515685 chr7 | 7 | 1448489   | 1451249   | 2761   | 2   | 0.55349   | 0.10989  | 1448082   | 1448897   | 1450963   | 145153!   |
| 202 NA10847 | [2515685 chr7 | 7 | 3384111   | 3389815   | 5705   | 7   | 0.787192  | 0.060785 | 3383451   | 3384772   | 3389523   | 339010!   |
| 203 NA10847 | [2515685 chr7 | 7 | 12297894  | 12298675  | 782    | 5   | 0.480755  | 0.070762 | 12297829  | 12297960  | 12298540  | 1229881!  |
| 204 NA10847 | [2515685 chr7 | 7 | 14024131  | 14025556  | 1426   | 5   | 0.808198  | 0.074059 | 14023511  | 14024751  | 14025262  | 1402585!  |
| 205 NA10847 | [2515685 chr7 | 7 | 38061632  | 38070805  | 9174   | 10  | 0.384651  | 0.048192 | 38061288  | 38061977  | 38070187  | 3807142!  |
| 206 NA10847 | [2515685 chr7 | 7 | 38159778  | 38177664  | 17887  | 19  | -0.357457 | 0.032858 | 38159476  | 38160081  | 38177341  | 3817798!  |
| 207 NA10847 | [2515685 chr7 | 7 | 62273692  | 62279802  | 6111   | 24  | -0.754609 | 0.035361 | 62272898  | 62274486  | 62279719  | 6227988!  |
| 208 NA10847 | [2515685 chr7 | 7 | 63995985  | 64009675  | 13691  | 17  | 0.298565  | 0.035852 | 63995676  | 63996294  | 64009043  | 6401030!  |
| 209 NA10847 | [2515685 chr7 | 7 | 64690171  | 64725545  | 35375  | 39  | 0.390061  | 0.022267 | 64689761  | 64690582  | 64725209  | 6472588!  |
| 210 NA10847 | [2515685 chr7 | 7 | 71858493  | 71859326  | 834    | 2   | -0.447566 | 0.082678 | 71858284  | 71858703  | 71858719  | 7185993!  |
| 211 NA10847 | [2515685 chr7 | 7 | 72156868  | 72157708  | 841    | 2   | -0.447566 | 0.082678 | 72156657  | 72157079  | 72157095  | 7215832!  |
| 212 NA10847 | [2515685 chr7 | 7 | 74695370  | 74696139  | 770    | 3   | -0.416559 | 0.073139 | 74695306  | 74695434  | 74695977  | 7469630!  |
| 213 NA10847 | [2515685 chr7 | 7 | 76173835  | 76175647  | 1813   | 2   | 0.636137  | 0.099829 | 76173564  | 76174106  | 76174852  | 7617644!  |
| 214 NA10847 | [2515685 chr7 | 7 | 89455601  | 89456632  | 1032   | 2   | 2.743694  | 0.177319 | 89455373  | 89455830  | 89456225  | 8945703!  |
| 215 NA10847 | [2515685 chr7 | 7 | 109034783 | 109042071 | 7289   | 6   | 1.833686  | 0.094478 | 109024063 | 109037134 | 109040586 | 10904355  |
| 216 NA10847 | [2515685 chr7 | 7 | 109776378 | 109782655 | 6278   | 5   | 0.888105  | 0.078    | 109775821 | 109776936 | 109782301 | 10978301! |
| 217 NA10847 | [2515685 chr7 | 7 | 133245202 | 133257360 | 12159  | 13  | 2.024939  | 0.066245 | 133244207 | 133246197 | 133255009 | 13326093  |
| 218 NA10847 | [2515685 chr7 | 7 | 141759291 | 141761893 | 2603   | 3   | -0.442439 | 0.087574 | 141758892 | 141759690 | 141761589 | 14176219  |
| 219 NA10847 | [2515685 chr7 | 7 | 141962017 | 141993247 | 31231  | 36  | -0.286261 | 0.024183 | 141961693 | 141962342 | 141992651 | 14199384  |
| 220 NA10847 | [2515685 chr7 | 7 | 143257273 | 143259025 | 1753   | 2   | -0.66527  | 0.115387 | 143256987 | 143257560 | 143258671 | 14325938  |
| 221 NA10847 | [2515685 chr7 | 7 | 143318111 | 143498326 | 180216 | 340 | 0.25291   | 0.007382 | 143318031 | 143318192 | 143497951 | 14349870  |
| 222 NA10847 | [2515685 chr7 | 7 | 143499971 | 143500529 | 559    | 2   | -0.742154 | 0.113814 | 143499944 | 143499999 | 143500486 | 14350057  |
| 223 NA10847 | [2515685 chr7 | 7 | 156976112 | 156978464 | 2353   | 2   | 0.521073  | 0.095526 | 156975812 | 156976413 | 156977896 | 15697903  |
| 224 NA10847 | [2515685 chr7 | 7 | 157023614 | 157027930 | 4317   | 7   | 0.277814  | 0.053737 | 157023242 | 157023987 | 157027451 | 15702840  |
| 225 NA10847 | [2515685 chr7 | 7 | 158207288 | 158209880 | 2593   | 2   | 0.768794  | 0.115609 | 158206344 | 158208233 | 158209333 | 15821042  |
| 226 NA10847 | [2515685 chr7 | 7 | 158617060 | 158624379 | 7320   | 6   | 0.755832  | 0.068721 | 158616763 | 158617357 | 158622028 | 15862673  |
| 227 NA10847 | [2515685 chr8 | 8 | 12903     | 110506    | 97604  | 107 | -0.278665 | 0.014074 | 12850     | 12957     | 110436    | 110576    |
| 228 NA10847 | [2515685 chr8 | 8 | 1328256   | 1343509   | 15254  | 45  | -1.358387 | 0.022055 | 1327688   | 1328824   | 1342795   | 134422!   |
| 229 NA10847 | [2515685 chr8 | 8 | 1394513   | 1398803   | 4291   | 6   | -0.390284 | 0.064164 | 1393955   | 1395072   | 1398426   | 139918!   |
| 230 NA10847 | [2515685 chr8 | 8 | 2238731   | 2253796   | 15066  | 10  | 0.690906  | 0.050908 | 2233839   | 2241488   | 2251039   | 225752!   |
| 231 NA10847 | [2515685 chr8 | 8 | 2303675   | 2306896   | 3222   | 2   | -0.590175 | 0.100959 | 2303064   | 2304286   | 2306494   | 230729!   |
| 232 NA10847 | [2515685 chr8 | 8 | 3982251   | 3987764   | 5514   | 7   | -0.409056 | 0.058741 | 3982012   | 3982491   | 3987365   | 398816!   |
| 233 NA10847 | [2515685 chr8 | 8 | 4751610   | 4755354   | 3745   | 3   | -0.472336 | 0.088691 | 4751096   | 4752124   | 4755000   | 475570!   |
| 234 NA10847 | [2515685 chr8 | 8 | 5582875   | 5594011   | 11137  | 9   | 0.759278  | 0.048518 | 5582615   | 5583135   | 5592820   | 559520!   |
| 235 NA10847 | [2515685 chr8 | 8 | 7094852   | 7268617   | 173766 | 405 | 0.695168  | 0.003117 | 7092427   | 7097278   | 7267878   | 726935!   |
| 236 NA10847 | [2515685 chr8 | 8 | 7277150   | 7430731   | 153582 | 354 | 0.695168  | 0.003117 | 7276887   | 7277413   | 7430300   | 743116!   |
| 237 NA10847 | [2515685 chr8 | 8 | 7603394   | 7774981   | 171588 | 475 | 0.695168  | 0.003117 | 7600972   | 7605817   | 7774750   | 777521!   |
| 238 NA10847 | [2515685 chr8 | 8 | 7777281   | 7930292   | 153012 | 308 | 0.695168  | 0.003117 | 7777081   | 7777481   | 7930155   | 793042!   |
| 239 NA10847 | [2515685 chr8 | 8 | 8079391   | 8084746   | 5356   | 14  | 0.280846  | 0.035793 | 8079382   | 8079401   | 8084594   | 808489!   |
| 240 NA10847 | [2515685 chr8 | 8 | 11985530  | 12072888  | 87359  | 177 | 0.401844  | 0.00621  | 11982232  | 11988287  | 12072625  | 1207315!  |
| 241 NA10847 | [2515685 chr8 | 8 | 12238199  | 12322179  | 83981  | 154 | 0.401844  | 0.00621  | 12235442  | 12241497  | 12321906  | 1232245!  |
| 242 NA10847 | [2515685 chr8 | 8 | 12377720  | 12383079  | 5360   | 12  | 0.294262  | 0.038001 | 12377569  | 12377872  | 12383069  | 1238308!  |
| 243 NA10847 | [2515685 chr8 | 8 | 15816453  | 15889494  | 73042  | 5   | -0.424248 | 0.061983 | 15815179  | 15817728  | 15886737  | 1599641!  |
| 244 NA10847 | [2515685 chr8 | 8 | 18900549  | 18901909  | 1361   | 2   | -0.542274 | 0.096624 | 18900138  | 18900960  | 18901577  | 1890224!  |
| 245 NA10847 | [2515685 chr8 | 8 | 20022286  | 20024771  | 2486   | 2   | -0.747831 | 0.118076 | 20021082  | 20023491  | 20024338  | 2002520!  |
| 246 NA10847 | [2515685 chr8 | 8 | 40301688  | 40309070  | 7383   | 7   | -0.708378 | 0.058232 | 40301316  | 40302061  | 40308873  | 4030926!  |
| 247 NA10847 | [2515685 chr8 | 8 | 51193670  | 51201152  | 7483   | 11  | -0.894243 | 0.049781 | 51193335  | 51194005  | 51200867  | 5120143!  |
| 248 NA10847 | [2515685 chr8 | 8 | 58278355  | 58287850  | 9496   | 8   | 0.86687   | 0.046425 | 58277116  | 58279595  | 58287616  | 5828808!  |
| 249 NA10847 | [2515685 chr8 | 8 | 115144501 | 115147461 | 2961   | 4   | -0.394901 | 0.075545 | 115144075 | 115144928 | 115147229 | 11514769! |
| 250 NA10847 | [2515685 chr8 | 8 | 115148105 | 115149916 | 1812   | 2   | -1.018225 | 0.128119 | 115147694 | 115148517 | 115149348 | 11515048  |
| 251 NA10847 | [2515685 chr8 | 8 | 120222657 | 120229952 | 7296   | 6   | 0.820718  | 0.062842 | 120218251 | 120225414 | 120229434 | 12023047! |
| 252 NA10847 | [2515685 chr9 | 9 | 310045    | 312573    | 2529   | 61  | 0.366314  | 0.016467 | 309952    | 310139    | 312407    | 31274!    |
| 253 NA10847 | [2515685 chr9 | 9 | 11306495  | 11602632  | 296138 | 4   | -0.308072 | 0.059537 | 11163118  | 11308858  | 11600269  | 1162193!  |
| 254 NA10847 | [2515685 chr9 | 9 | 38763857  | 38954466  | 190610 | 334 | -0.261062 | 0.00783  | 38761896  | 38765818  | 38954213  | 3895471!  |

|             |                |    |           |           |        |      |           |          |           |           |           |           |
|-------------|----------------|----|-----------|-----------|--------|------|-----------|----------|-----------|-----------|-----------|-----------|
| 255 NA10847 | [2515685 chr9  | 9  | 40254839  | 40277620  | 22782  | 42   | -0.313688 | 0.022411 | 40254572  | 40255106  | 40277481  | 40277760  |
| 256 NA10847 | [2515685 chr9  | 9  | 41234952  | 41240163  | 5212   | 10   | -0.611969 | 0.046178 | 41234900  | 41235005  | 41239994  | 41240330  |
| 257 NA10847 | [2515685 chr9  | 9  | 43065211  | 43066832  | 1622   | 2    | -0.711395 | 0.099956 | 43064261  | 43066162  | 43066646  | 43067010  |
| 258 NA10847 | [2515685 chr9  | 9  | 43182771  | 43193846  | 11076  | 19   | -0.39231  | 0.034651 | 43179223  | 43185134  | 43193656  | 43194030  |
| 259 NA10847 | [2515685 chr9  | 9  | 43965873  | 44064914  | 99042  | 22   | -0.280183 | 0.026709 | 43961965  | 43968236  | 44064541  | 44065280  |
| 260 NA10847 | [2515685 chr9  | 9  | 66047392  | 66052737  | 5346   | 11   | -0.642091 | 0.04642  | 66047340  | 66047445  | 66052707  | 66052760  |
| 261 NA10847 | [2515685 chr9  | 9  | 89413068  | 89422752  | 9685   | 8    | 0.33257   | 0.057109 | 89412804  | 89413332  | 89421346  | 89424150  |
| 262 NA10847 | [2515685 chr9  | 9  | 135438418 | 135444067 | 5650   | 2    | 2.790215  | 0.147643 | 135383632 | 135440781 | 135443016 | 135445110 |
| 263 NA10847 | [2515685 chr9  | 9  | 138397462 | 138399638 | 2177   | 11   | -0.330319 | 0.04741  | 138397454 | 138397471 | 138399572 | 138399700 |
| 264 NA10847 | [2515685 chr10 | 10 | 6693908   | 6703893   | 9986   | 8    | 0.764827  | 0.056212 | 6692231   | 6695585   | 6703779   | 6704000   |
| 265 NA10847 | [2515685 chr10 | 10 | 19788068  | 19790461  | 2394   | 3    | -0.446224 | 0.079256 | 19787726  | 19788411  | 19789952  | 19790970  |
| 266 NA10847 | [2515685 chr10 | 10 | 20036833  | 20038315  | 1483   | 2    | -2.276243 | 0.155523 | 20036464  | 20037202  | 20038007  | 20038620  |
| 267 NA10847 | [2515685 chr10 | 10 | 20888199  | 20900114  | 11916  | 9    | -0.68889  | 0.054584 | 20883329  | 20890946  | 20897367  | 20902910  |
| 268 NA10847 | [2515685 chr10 | 10 | 37483141  | 37489219  | 6079   | 10   | -0.3254   | 0.040465 | 37482743  | 37483539  | 37488997  | 37489440  |
| 269 NA10847 | [2515685 chr10 | 10 | 37491079  | 37527174  | 36096  | 55   | -0.755585 | 0.016416 | 37490689  | 37491470  | 37526783  | 37527560  |
| 270 NA10847 | [2515685 chr10 | 10 | 42564252  | 42565662  | 1411   | 4    | -0.367256 | 0.071802 | 42563949  | 42564556  | 42565423  | 42565900  |
| 271 NA10847 | [2515685 chr10 | 10 | 46107580  | 46129517  | 21938  | 32   | -0.33279  | 0.020809 | 46104113  | 46110327  | 46129280  | 46129750  |
| 272 NA10847 | [2515685 chr10 | 10 | 46187014  | 46233249  | 46236  | 112  | -0.282251 | 0.011439 | 46186825  | 46187203  | 46233114  | 46233380  |
| 273 NA10847 | [2515685 chr10 | 10 | 46242366  | 47173707  | 931342 | 1308 | -0.320274 | 0.003516 | 46242203  | 46242530  | 47173507  | 47173900  |
| 274 NA10847 | [2515685 chr10 | 10 | 47219668  | 47237545  | 17878  | 58   | -0.310348 | 0.01627  | 47219445  | 47219892  | 47237269  | 47237820  |
| 275 NA10847 | [2515685 chr10 | 10 | 47723235  | 47746015  | 22781  | 64   | -0.359422 | 0.01571  | 47725187  | 47725982  | 47745989  | 47746040  |
| 276 NA10847 | [2515685 chr10 | 10 | 47755312  | 47801563  | 46252  | 120  | -0.2885   | 0.011368 | 47755177  | 47755448  | 47801368  | 47801750  |
| 277 NA10847 | [2515685 chr10 | 10 | 47887212  | 47887694  | 483    | 2    | -0.752022 | 0.083468 | 47887044  | 47887381  | 47887494  | 47887890  |
| 278 NA10847 | [2515685 chr10 | 10 | 47888084  | 47889830  | 1747   | 6    | -0.430129 | 0.048592 | 47887954  | 47888214  | 47889529  | 47890130  |
| 279 NA10847 | [2515685 chr10 | 10 | 48494493  | 48516048  | 21556  | 30   | -0.319529 | 0.021192 | 48491014  | 48497240  | 48515812  | 48516280  |
| 280 NA10847 | [2515685 chr10 | 10 | 48576756  | 48622994  | 46239  | 108  | -0.285142 | 0.011516 | 48576562  | 48576950  | 48622859  | 48623130  |
| 281 NA10847 | [2515685 chr10 | 10 | 48632112  | 48641100  | 8989   | 20   | -0.320998 | 0.023957 | 48631949  | 48632276  | 48640945  | 48641250  |
| 282 NA10847 | [2515685 chr10 | 10 | 48642579  | 48715124  | 72546  | 116  | -0.359794 | 0.010438 | 48642297  | 48642861  | 48714752  | 48715490  |
| 283 NA10847 | [2515685 chr10 | 10 | 51119630  | 51132551  | 12922  | 21   | -0.309559 | 0.026826 | 51119365  | 51119895  | 51132382  | 51132720  |
| 284 NA10847 | [2515685 chr10 | 10 | 52136987  | 52139263  | 2277   | 5    | -0.263554 | 0.050467 | 52136355  | 52137619  | 52139186  | 52139340  |
| 285 NA10847 | [2515685 chr10 | 10 | 55013473  | 55030874  | 17402  | 11   | 0.294416  | 0.048031 | 55011568  | 55015379  | 55030462  | 55031280  |
| 286 NA10847 | [2515685 chr10 | 10 | 56117212  | 56139275  | 22064  | 20   | -0.97614  | 0.035302 | 56115764  | 56118661  | 56138931  | 56139610  |
| 287 NA10847 | [2515685 chr10 | 10 | 66977355  | 66985193  | 7839   | 8    | -1.004282 | 0.062467 | 66976803  | 66977908  | 66984894  | 66985490  |
| 288 NA10847 | [2515685 chr10 | 10 | 70951158  | 70961194  | 10037  | 7    | -0.694676 | 0.058228 | 70949290  | 70953027  | 70960964  | 70961420  |
| 289 NA10847 | [2515685 chr10 | 10 | 81662845  | 81666327  | 3483   | 5    | -0.346408 | 0.06389  | 81662614  | 81663077  | 81666038  | 81666610  |
| 290 NA10847 | [2515685 chr10 | 10 | 88866216  | 88966295  | 100080 | 111  | -0.340563 | 0.012524 | 88865617  | 88866816  | 88965910  | 88966680  |
| 291 NA10847 | [2515685 chr10 | 10 | 89138419  | 89179870  | 41452  | 70   | -0.263621 | 0.015947 | 89137950  | 89138889  | 89179587  | 89180150  |
| 292 NA10847 | [2515685 chr10 | 10 | 114102241 | 114106477 | 4237   | 5    | -4.083408 | 0.158299 | 114101694 | 114102788 | 114105867 | 114107080 |
| 293 NA10847 | [2515685 chr10 | 10 | 124336365 | 124341749 | 5385   | 6    | 0.525656  | 0.066095 | 124335581 | 124337149 | 124341238 | 124342260 |
| 294 NA10847 | [2515685 chr10 | 10 | 127564343 | 127601200 | 36858  | 21   | -0.268321 | 0.033058 | 127563306 | 127565381 | 127598453 | 127607460 |
| 295 NA10847 | [2515685 chr10 | 10 | 128937176 | 128938855 | 1680   | 2    | 0.579389  | 0.103729 | 128936901 | 128937451 | 128938518 | 128939190 |
| 296 NA10847 | [2515685 chr10 | 10 | 134168766 | 134170259 | 1494   | 17   | -0.351849 | 0.03814  | 134168524 | 134169008 | 134170097 | 134170420 |
| 297 NA10847 | [2515685 chr11 | 11 | 2840307   | 2843512   | 3206   | 4    | 0.418838  | 0.077406 | 2839959   | 2840656   | 2842965   | 2844050   |
| 298 NA10847 | [2515685 chr11 | 11 | 2999680   | 3137581   | 137902 | 2    | -0.530097 | 0.087748 | 2949255   | 3002762   | 3134499   | 3173260   |
| 299 NA10847 | [2515685 chr11 | 11 | 3271902   | 3274139   | 2238   | 3    | -0.432954 | 0.074322 | 3271303   | 3272502   | 3273580   | 3274690   |
| 300 NA10847 | [2515685 chr11 | 11 | 3628748   | 3632795   | 4048   | 6    | -0.450922 | 0.060228 | 3625722   | 3631775   | 3632594   | 3632990   |
| 301 NA10847 | [2515685 chr11 | 11 | 4924831   | 4932599   | 7769   | 8    | -0.729278 | 0.056366 | 4924403   | 4925260   | 4931948   | 4933250   |
| 302 NA10847 | [2515685 chr11 | 11 | 5717038   | 5722027   | 4990   | 3    | 2.301616  | 0.138405 | 5716660   | 5717416   | 5718945   | 5725480   |
| 303 NA10847 | [2515685 chr11 | 11 | 5741269   | 5765993   | 24725  | 33   | 1.842442  | 0.037569 | 5741059   | 5741480   | 5765632   | 5766350   |
| 304 NA10847 | [2515685 chr11 | 11 | 11831868  | 11833089  | 1222   | 2    | 0.908328  | 0.12427  | 11831412  | 11832324  | 11832853  | 11833320  |
| 305 NA10847 | [2515685 chr11 | 11 | 18906905  | 18928671  | 21767  | 30   | 0.658302  | 0.027504 | 18906533  | 18907278  | 18928457  | 18928880  |
| 306 NA10847 | [2515685 chr11 | 11 | 28965605  | 28969186  | 3582   | 5    | 2.843768  | 0.158253 | 28965284  | 28965927  | 28968702  | 28969670  |
| 307 NA10847 | [2515685 chr11 | 11 | 48284073  | 48284771  | 699    | 2    | 0.855221  | 0.101839 | 48283862  | 48284285  | 48284572  | 48284970  |
| 308 NA10847 | [2515685 chr11 | 11 | 49665830  | 49715830  | 50001  | 36   | 0.4227656 | 0.025136 | 49665251  | 49666410  | 49721748  | 49721980  |
| 309 NA10847 | [2515685 chr11 | 11 | 55124643  | 55212650  | 88008  | 98   | -0.743945 | 0.016565 | 55124460  | 55124827  | 55209568  | 55215750  |

|             |                |    |           |           |         |      |           |          |           |           |           |           |
|-------------|----------------|----|-----------|-----------|---------|------|-----------|----------|-----------|-----------|-----------|-----------|
| 310 NA10847 | [2515685 chr11 | 11 | 81179059  | 81203719  | 24661   | 18   | -0.717008 | 0.038806 | 81178883  | 81179236  | 81203484  | 8120395-  |
| 311 NA10847 | [2515685 chr11 | 11 | 88266938  | 88303948  | 37011   | 40   | 0.300621  | 0.023997 | 88266424  | 88267453  | 88303762  | 8830413!  |
| 312 NA10847 | [2515685 chr11 | 11 | 89184898  | 89189792  | 4895    | 5    | 0.411876  | 0.080012 | 89184243  | 89185554  | 89189177  | 8919040!  |
| 313 NA10847 | [2515685 chr11 | 11 | 89260124  | 89266247  | 6124    | 10   | -0.265356 | 0.046975 | 89259811  | 89260437  | 89265993  | 8926650!  |
| 314 NA10847 | [2515685 chr11 | 11 | 89323920  | 89329409  | 5490    | 11   | -0.265581 | 0.043537 | 89323666  | 89324175  | 89329090  | 8932972!  |
| 315 NA10847 | [2515685 chr11 | 11 | 93324629  | 93328851  | 4223    | 4    | -0.776539 | 0.076306 | 93324402  | 93324857  | 93328208  | 9332949!  |
| 316 NA10847 | [2515685 chr12 | 12 | 300666    | 302505    | 1840    | 2    | -0.834217 | 0.109012 | 300400    | 300933    | 301926    | 303084    |
| 317 NA10847 | [2515685 chr12 | 12 | 736840    | 744802    | 7963    | 9    | 0.789258  | 0.050347 | 736616    | 737064    | 744211    | 745394    |
| 318 NA10847 | [2515685 chr12 | 12 | 2112534   | 2127044   | 14511   | 15   | 0.643662  | 0.038653 | 2109107   | 2115961   | 2126809   | 2127279   |
| 319 NA10847 | [2515685 chr12 | 12 | 6113530   | 6117052   | 3523    | 3    | 0.600792  | 0.098316 | 6111640   | 6115421   | 6116289   | 6117816   |
| 320 NA10847 | [2515685 chr12 | 12 | 8204002   | 8262986   | 58985   | 73   | 0.268774  | 0.016766 | 8201345   | 8206659   | 8262374   | 8263598   |
| 321 NA10847 | [2515685 chr12 | 12 | 8262986   | 8270350   | 7365    | 18   | 0.930997  | 0.03074  | 8262374   | 8263598   | 8269654   | 8271046   |
| 322 NA10847 | [2515685 chr12 | 12 | 10461864  | 10491893  | 30030   | 21   | -0.373187 | 0.033961 | 10459687  | 10464041  | 10488400  | 1055394!  |
| 323 NA10847 | [2515685 chr12 | 12 | 11398049  | 11436142  | 38094   | 34   | -0.835269 | 0.026902 | 11397507  | 11398591  | 11435669  | 1143661!  |
| 324 NA10847 | [2515685 chr12 | 12 | 11436142  | 11463223  | 27082   | 32   | -0.310071 | 0.025949 | 11435669  | 11436615  | 11459990  | 1146645!  |
| 325 NA10847 | [2515685 chr12 | 12 | 30348930  | 30352723  | 3794    | 3    | 0.525829  | 0.080977 | 30348429  | 30349431  | 30351682  | 3035376!  |
| 326 NA10847 | [2515685 chr12 | 12 | 31869221  | 31878319  | 9099    | 4    | 0.569111  | 0.071811 | 31864235  | 31872714  | 31878008  | 3187863!  |
| 327 NA10847 | [2515685 chr12 | 12 | 36209451  | 36221304  | 11854   | 12   | -0.250102 | 0.038551 | 36200442  | 36212944  | 36220304  | 3622230!  |
| 328 NA10847 | [2515685 chr12 | 12 | 130257877 | 130259876 | 2000    | 3    | -0.487339 | 0.074985 | 130257493 | 130258262 | 130259649 | 13026010  |
| 329 NA10847 | [2515685 chr12 | 12 | 130798727 | 130802870 | 4144    | 5    | -0.806782 | 0.063349 | 130798268 | 130799187 | 130801345 | 13080439  |
| 330 NA10847 | [2515685 chr12 | 12 | 131046250 | 131046750 | 501     | 2    | 1.133096  | 0.121015 | 131046129 | 131046371 | 131046551 | 13104694  |
| 331 NA10847 | [2515685 chr13 | 13 | 25947233  | 25950398  | 3166    | 3    | 2.516483  | 0.129683 | 25946194  | 25948272  | 25949415  | 2595138   |
| 332 NA10847 | [2515685 chr13 | 13 | 33029572  | 33043421  | 13850   | 9    | 0.80079   | 0.056497 | 33000262  | 33034253  | 33042925  | 3304391!  |
| 333 NA10847 | [2515685 chr13 | 13 | 36971484  | 36983475  | 11992   | 10   | -0.764561 | 0.05457  | 36969416  | 36973552  | 36982905  | 3698404!  |
| 334 NA10847 | [2515685 chr13 | 13 | 69633905  | 69673289  | 39385   | 41   | 0.719112  | 0.024893 | 69633412  | 69634399  | 69672985  | 6967359!  |
| 335 NA10847 | [2515685 chr13 | 13 | 71375850  | 71378291  | 2442    | 2    | -0.883711 | 0.134791 | 71374967  | 71376734  | 71377584  | 7137899!  |
| 336 NA10847 | [2515685 chr13 | 13 | 88371996  | 88373992  | 1997    | 3    | -0.530783 | 0.085154 | 88371823  | 88372170  | 88373445  | 8837454!  |
| 337 NA10847 | [2515685 chr13 | 13 | 109215660 | 109217089 | 1430    | 5    | -0.537539 | 0.059925 | 109215230 | 109216090 | 109216885 | 10921729  |
| 338 NA10847 | [2515685 chr13 | 13 | 113079647 | 113086819 | 7173    | 3    | 0.507631  | 0.082163 | 113078890 | 113080404 | 113082138 | 11309434  |
| 339 NA10847 | [2515685 chr14 | 14 | 18439491  | 19494842  | 1055352 | 1595 | -0.269795 | 0.003391 | 18437497  | 18441485  | 19494444  | 1949524   |
| 340 NA10847 | [2515685 chr14 | 14 | 19763327  | 19766855  | 3529    | 5    | -0.379772 | 0.065875 | 19762808  | 19763847  | 19766515  | 1976719!  |
| 341 NA10847 | [2515685 chr14 | 14 | 34499224  | 34502267  | 3044    | 3    | -0.668503 | 0.084035 | 34498536  | 34499912  | 34501891  | 3450264   |
| 342 NA10847 | [2515685 chr14 | 14 | 42059344  | 42062997  | 3654    | 2    | 0.796225  | 0.118299 | 42056485  | 42062203  | 42062601  | 4206339!  |
| 343 NA10847 | [2515685 chr14 | 14 | 73070288  | 73077249  | 6962    | 7    | -0.659181 | 0.063737 | 73068747  | 73071829  | 73076337  | 7307816   |
| 344 NA10847 | [2515685 chr14 | 14 | 73106064  | 73110687  | 4624    | 3    | 0.560511  | 0.0787   | 73105752  | 73106376  | 73110054  | 7311132!  |
| 345 NA10847 | [2515685 chr15 | 15 | 19840090  | 19845597  | 5508    | 11   | -0.732432 | 0.047044 | 19839894  | 19840287  | 19845254  | 1984594   |
| 346 NA10847 | [2515685 chr15 | 15 | 21605983  | 21614602  | 8620    | 7    | 0.657687  | 0.064677 | 21605507  | 21606459  | 21612298  | 2163669!  |
| 347 NA10847 | [2515685 chr15 | 15 | 21806543  | 21815139  | 8597    | 15   | -0.851065 | 0.042209 | 21803314  | 21808847  | 21814238  | 2181604!  |
| 348 NA10847 | [2515685 chr15 | 15 | 24986053  | 24992250  | 6198    | 7    | 0.726874  | 0.06271  | 24985426  | 24986680  | 24991680  | 2499282!  |
| 349 NA10847 | [2515685 chr15 | 15 | 27688132  | 27690372  | 2241    | 3    | -0.793098 | 0.101723 | 27687785  | 27688480  | 27690197  | 2769054!  |
| 350 NA10847 | [2515685 chr15 | 15 | 32518204  | 32528011  | 9808    | 8    | 0.505443  | 0.055905 | 32517506  | 32518902  | 32526671  | 3252935!  |
| 351 NA10847 | [2515685 chr15 | 15 | 32535021  | 32578731  | 43711   | 40   | 0.569278  | 0.025378 | 32534665  | 32535377  | 32578511  | 3257895!  |
| 352 NA10847 | [2515685 chr15 | 15 | 32581490  | 32592025  | 10536   | 7    | 0.567551  | 0.061655 | 32581241  | 32581740  | 32591791  | 3259226!  |
| 353 NA10847 | [2515685 chr15 | 15 | 74671388  | 74682822  | 11435   | 9    | 0.870562  | 0.056401 | 74671122  | 74671654  | 74680518  | 7468951!  |
| 354 NA10847 | [2515685 chr15 | 15 | 80439837  | 80452154  | 12318   | 11   | -0.29747  | 0.035797 | 80438703  | 80440972  | 80451464  | 8045284   |
| 355 NA10847 | [2515685 chr15 | 15 | 80826190  | 80837020  | 10831   | 14   | -0.252713 | 0.03255  | 80825196  | 80827184  | 80836451  | 8083759!  |
| 356 NA10847 | [2515685 chr15 | 15 | 80963358  | 80974870  | 11513   | 13   | -0.251686 | 0.032066 | 80962935  | 80963781  | 80973972  | 8097576!  |
| 357 NA10847 | [2515685 chr15 | 15 | 83685983  | 83688723  | 2741    | 2    | -0.633914 | 0.110245 | 83684729  | 83687238  | 83687705  | 8368974!  |
| 358 NA10847 | [2515685 chr15 | 15 | 98234084  | 98240716  | 6633    | 8    | 0.871157  | 0.061065 | 98233842  | 98234327  | 98239350  | 9824208!  |
| 359 NA10847 | [2515685 chr15 | 15 | 100109640 | 100122682 | 13043   | 98   | 1.026146  | 0.012068 | 100108905 | 100110376 | 100122315 | 10012305! |
| 360 NA10847 | [2515685 chr15 | 15 | 100233811 | 100236470 | 2660    | 11   | -0.412785 | 0.042935 | 100233707 | 100233916 | 100235652 | 10023728  |
| 361 NA10847 | [2515685 chr16 | 16 | 946002    | 948831    | 2830    | 2    | -0.760435 | 0.110629 | 945660    | 946345    | 947314    | 950345    |
| 362 NA10847 | [2515685 chr16 | 16 | 16538019  | 16556568  | 18550   | 15   | 0.332969  | 0.0386   | 16537767  | 16538272  | 16556033  | 1655710!  |
| 363 NA10847 | [2515685 chr16 | 16 | 16633469  | 16640258  | 6790    | 5    | 0.795569  | 0.068117 | 16632502  | 16634437  | 16639854  | 1664066!  |
| 364 NA10847 | [2515685 chr16 | 16 | 18634472  | 18640638  | 6167    | 6    | 0.402266  | 0.062741 | 18634215  | 18634730  | 18639845  | 1864143!  |

|             |                |    |          |          |        |     |           |          |          |          |          |          |
|-------------|----------------|----|----------|----------|--------|-----|-----------|----------|----------|----------|----------|----------|
| 365 NA10847 | [2515685 chr16 | 16 | 21469253 | 21495391 | 26139  | 28  | 0.293539  | 0.02659  | 21469017 | 21469490 | 21493511 | 21501107 |
| 366 NA10847 | [2515685 chr16 | 16 | 22520654 | 22618743 | 98090  | 85  | 0.315646  | 0.015577 | 22519883 | 22521425 | 22617181 | 22620301 |
| 367 NA10847 | [2515685 chr16 | 16 | 28522768 | 28525408 | 2641   | 3   | -0.830574 | 0.08083  | 28522366 | 28523170 | 28525115 | 28525707 |
| 368 NA10847 | [2515685 chr16 | 16 | 28732542 | 28735489 | 2948   | 2   | 0.757053  | 0.11065  | 28732323 | 28732762 | 28733609 | 28739351 |
| 369 NA10847 | [2515685 chr16 | 16 | 32159898 | 32160377 | 480    | 2   | -1.660409 | 0.09342  | 32159453 | 32160343 | 32160346 | 32160401 |
| 370 NA10847 | [2515685 chr16 | 16 | 32210096 | 32219640 | 9545   | 19  | 0.270704  | 0.026833 | 32209551 | 32210641 | 32219531 | 32219747 |
| 371 NA10847 | [2515685 chr16 | 16 | 32606692 | 32607163 | 472    | 2   | -1.660466 | 0.093422 | 32606661 | 32606724 | 32606727 | 32607597 |
| 372 NA10847 | [2515685 chr16 | 16 | 33100875 | 33101346 | 472    | 2   | -1.660406 | 0.09342  | 33100438 | 33101312 | 33101315 | 33101377 |
| 373 NA10847 | [2515685 chr16 | 16 | 33157406 | 33157879 | 474    | 2   | -1.660396 | 0.09342  | 33156967 | 33157845 | 33157848 | 33157917 |
| 374 NA10847 | [2515685 chr16 | 16 | 33207215 | 33217055 | 9841   | 18  | 0.276872  | 0.027844 | 33206951 | 33207480 | 33216946 | 33217167 |
| 375 NA10847 | [2515685 chr16 | 16 | 83994929 | 84004171 | 9243   | 81  | -0.347363 | 0.01373  | 83994558 | 83995300 | 84003767 | 84004571 |
| 376 NA10847 | [2515685 chr16 | 16 | 84562720 | 84565235 | 2516   | 11  | 0.838198  | 0.048598 | 84561685 | 84563756 | 84565142 | 84565327 |
| 377 NA10847 | [2515685 chr16 | 16 | 86669849 | 86672366 | 2518   | 2   | -0.730657 | 0.10247  | 86669288 | 86670411 | 86671217 | 86673517 |
| 378 NA10847 | [2515685 chr16 | 16 | 88423913 | 88426101 | 2189   | 3   | -0.617009 | 0.093197 | 88423258 | 88424569 | 88425843 | 88426361 |
| 379 NA10847 | [2515685 chr16 | 16 | 88710464 | 88712266 | 1803   | 9   | -0.359572 | 0.053167 | 88710456 | 88710473 | 88712200 | 88712337 |
| 380 NA10847 | [2515685 chr17 | 17 | 966845   | 969578   | 2734   | 21  | 0.277791  | 0.033833 | 966537   | 967154   | 969378   | 969775   |
| 381 NA10847 | [2515685 chr17 | 17 | 18299050 | 18332345 | 33296  | 46  | -0.324029 | 0.021133 | 18298294 | 18299807 | 18331978 | 18332717 |
| 382 NA10847 | [2515685 chr17 | 17 | 20298196 | 20337190 | 38995  | 58  | -0.268165 | 0.018569 | 20298119 | 20298273 | 20336945 | 20337431 |
| 383 NA10847 | [2515685 chr17 | 17 | 21942843 | 21954469 | 11627  | 19  | -0.409042 | 0.033295 | 21942618 | 21943068 | 21954310 | 21954627 |
| 384 NA10847 | [2515685 chr17 | 17 | 27384313 | 27385596 | 1284   | 3   | 0.455985  | 0.087395 | 27383767 | 27384860 | 27385274 | 27385917 |
| 385 NA10847 | [2515685 chr17 | 17 | 33425145 | 33430792 | 5648   | 10  | -0.434956 | 0.045558 | 33424532 | 33425759 | 33428591 | 33529297 |
| 386 NA10847 | [2515685 chr17 | 17 | 33654387 | 33659558 | 5172   | 12  | -0.445638 | 0.042137 | 33653601 | 33655173 | 33658997 | 33660117 |
| 387 NA10847 | [2515685 chr17 | 17 | 40986513 | 41060452 | 73940  | 83  | 0.283556  | 0.015868 | 40986038 | 40986989 | 41058251 | 41062697 |
| 388 NA10847 | [2515685 chr17 | 17 | 41521287 | 41724965 | 203679 | 201 | 0.641717  | 0.010682 | 41521002 | 41521572 | 41724205 | 41725727 |
| 389 NA10847 | [2515685 chr17 | 17 | 41741357 | 41762764 | 21408  | 24  | 0.251999  | 0.025637 | 41740846 | 41741868 | 41762258 | 41763277 |
| 390 NA10847 | [2515685 chr17 | 17 | 41779931 | 41788050 | 8120   | 4   | 0.408802  | 0.061096 | 41779457 | 41780406 | 41786164 | 41789931 |
| 391 NA10847 | [2515685 chr17 | 17 | 41964733 | 41980180 | 15448  | 15  | 0.282217  | 0.031145 | 41964517 | 41964949 | 41979673 | 41980687 |
| 392 NA10847 | [2515685 chr17 | 17 | 42905976 | 42908985 | 3010   | 2   | 0.67173   | 0.124616 | 42905585 | 42906368 | 42906957 | 42911017 |
| 393 NA10847 | [2515685 chr17 | 17 | 42970703 | 42975972 | 5270   | 11  | -0.422202 | 0.043902 | 42970185 | 42971221 | 42975162 | 42977678 |
| 394 NA10847 | [2515685 chr17 | 17 | 60339142 | 60358929 | 19788  | 13  | 0.64156   | 0.042352 | 60338734 | 60339551 | 60357902 | 60359951 |
| 395 NA10847 | [2515685 chr18 | 18 | 61874791 | 61883105 | 8315   | 9   | -0.848765 | 0.053107 | 61874483 | 61875100 | 61882738 | 61883477 |
| 396 NA10847 | [2515685 chr18 | 18 | 61917747 | 61920171 | 2425   | 4   | 1.930224  | 0.122888 | 61917522 | 61917973 | 61919646 | 61920697 |
| 397 NA10847 | [2515685 chr18 | 18 | 74231104 | 74234275 | 3172   | 30  | -0.508804 | 0.018504 | 74230952 | 74231256 | 74234139 | 74234417 |
| 398 NA10847 | [2515685 chr18 | 18 | 74371540 | 74376367 | 4828   | 8   | 0.275801  | 0.037889 | 74371016 | 74372064 | 74375833 | 74376907 |
| 399 NA10847 | [2515685 chr18 | 18 | 74392800 | 74398225 | 5426   | 4   | 0.547132  | 0.076898 | 74390826 | 74394774 | 74397790 | 74398667 |
| 400 NA10847 | [2515685 chr19 | 19 | 310414   | 312953   | 2540   | 14  | -0.586478 | 0.038462 | 309687   | 311142   | 312913   | 312994   |
| 401 NA10847 | [2515685 chr19 | 19 | 8704062  | 8705799  | 1738   | 2   | 0.528355  | 0.101955 | 8703659  | 8704466  | 8704912  | 8706687  |
| 402 NA10847 | [2515685 chr19 | 19 | 8708780  | 8763535  | 54756  | 94  | 0.835935  | 0.011234 | 8708296  | 8709264  | 8763160  | 8763917  |
| 403 NA10847 | [2515685 chr19 | 19 | 23007904 | 23013841 | 5938   | 6   | 0.736916  | 0.071181 | 22990964 | 23010431 | 23013525 | 23014157 |
| 404 NA10847 | [2515685 chr19 | 19 | 23597182 | 23600235 | 3054   | 5   | -0.842614 | 0.073251 | 23596541 | 23597823 | 23599600 | 23600877 |
| 405 NA10847 | [2515685 chr19 | 19 | 40543556 | 40554347 | 10792  | 9   | -0.500816 | 0.050153 | 40543292 | 40543821 | 40554020 | 40554677 |
| 406 NA10847 | [2515685 chr19 | 19 | 41450187 | 41493612 | 43426  | 28  | -0.35865  | 0.022964 | 41421528 | 41452714 | 41491085 | 41497857 |
| 407 NA10847 | [2515685 chr19 | 19 | 42450473 | 42487512 | 37040  | 33  | -0.381469 | 0.020163 | 42413600 | 42453000 | 42486487 | 42488537 |
| 408 NA10847 | [2515685 chr19 | 19 | 58169057 | 58171564 | 2508   | 2   | 0.46435   | 0.092835 | 58168791 | 58169324 | 58171021 | 58172107 |
| 409 NA10847 | [2515685 chr19 | 19 | 58210435 | 58244458 | 34024  | 26  | -0.682701 | 0.030203 | 58209863 | 58211007 | 58243893 | 58245027 |
| 410 NA10847 | [2515685 chr19 | 19 | 59247755 | 59252061 | 4307   | 5   | 0.694063  | 0.070529 | 59246427 | 59249084 | 59251854 | 59252267 |
| 411 NA10847 | [2515685 chr19 | 19 | 59420142 | 59435274 | 15133  | 18  | 0.33101   | 0.033998 | 59419795 | 59420489 | 59435027 | 59435527 |
| 412 NA10847 | [2515685 chr19 | 19 | 60958920 | 60976029 | 17110  | 15  | -0.708494 | 0.039298 | 60957933 | 60959907 | 60975748 | 60976317 |
| 413 NA10847 | [2515685 chr20 | 20 | 1511097  | 1532477  | 21381  | 26  | 0.762968  | 0.030935 | 1510534  | 1511660  | 1532182  | 1532777  |
| 414 NA10847 | [2515685 chr20 | 20 | 26136817 | 26137613 | 797    | 2   | 0.949644  | 0.118011 | 26136626 | 26137008 | 26137444 | 26137778 |
| 415 NA10847 | [2515685 chr20 | 20 | 26147697 | 26161501 | 13805  | 23  | -0.386665 | 0.030349 | 26147451 | 26147944 | 26161227 | 26161771 |
| 416 NA10847 | [2515685 chr20 | 20 | 49817373 | 49819212 | 1840   | 2   | 0.653626  | 0.116743 | 49816867 | 49817880 | 49818962 | 49819467 |
| 417 NA10847 | [2515685 chr20 | 20 | 59951513 | 59957050 | 5538   | 18  | 0.5616    | 0.032899 | 59950681 | 59952345 | 59956538 | 59957567 |
| 418 NA10847 | [2515685 chr20 | 20 | 61708834 | 61711805 | 2972   | 22  | -0.299369 | 0.031169 | 61708573 | 61709096 | 61711616 | 61711997 |
| 419 NA10847 | [2515685 chr20 | 20 | 62233505 | 62235897 | 2393   | 4   | 0.720895  | 0.057213 | 62232847 | 62234163 | 62235101 | 62236697 |

|             |                |    |           |           |        |     |           |          |           |           |           |           |
|-------------|----------------|----|-----------|-----------|--------|-----|-----------|----------|-----------|-----------|-----------|-----------|
| 420 NA10847 | [2515685 chr22 | 22 | 14480514  | 14514775  | 34262  | 62  | -0.375811 | 0.017655 | 14480270  | 14480758  | 14514558  | 1451499:  |
| 421 NA10847 | [2515685 chr22 | 22 | 17081443  | 17084550  | 3108   | 2   | -0.79018  | 0.124049 | 17081421  | 17081466  | 17081871  | 1708744:  |
| 422 NA10847 | [2515685 chr22 | 22 | 17385504  | 17397941  | 12438  | 22  | -0.284296 | 0.03157  | 17385031  | 17385977  | 17397517  | 1739836:  |
| 423 NA10847 | [2515685 chr22 | 22 | 18744519  | 18881582  | 137064 | 156 | -0.412161 | 0.011456 | 18742262  | 18746777  | 18878903  | 1893414:  |
| 424 NA10847 | [2515685 chr22 | 22 | 19392079  | 19419485  | 27407  | 8   | -0.570796 | 0.052988 | 19391751  | 19392407  | 19416806  | 1944992:  |
| 425 NA10847 | [2515685 chr22 | 22 | 20001890  | 20121795  | 119906 | 165 | -0.373102 | 0.007847 | 20001715  | 20002065  | 20121548  | 2012204:  |
| 426 NA10847 | [2515685 chr22 | 22 | 20137248  | 20243640  | 106393 | 148 | -0.373102 | 0.007847 | 20136561  | 20137935  | 20240961  | 2030228:  |
| 427 NA10847 | [2515685 chr22 | 22 | 22623673  | 22626055  | 2383   | 7   | -0.385711 | 0.055607 | 22623407  | 22623940  | 22625889  | 2262622:  |
| 428 NA10847 | [2515685 chr22 | 22 | 22647566  | 22654546  | 6981   | 12  | -0.363956 | 0.043723 | 22647469  | 22647663  | 22653118  | 2265597:  |
| 429 NA10847 | [2515685 chr22 | 22 | 22672624  | 22674936  | 2313   | 4   | 1.19249   | 0.088886 | 22672391  | 22672858  | 22674426  | 2267544:  |
| 430 NA10847 | [2515685 chr22 | 22 | 22677557  | 22683930  | 6374   | 3   | 0.525186  | 0.087739 | 22677005  | 22678110  | 22681309  | 2268655:  |
| 431 NA10847 | [2515685 chr22 | 22 | 22683930  | 22688523  | 4594   | 3   | -0.701972 | 0.095382 | 22681309  | 22686552  | 22687378  | 2268966:  |
| 432 NA10847 | [2515685 chr22 | 22 | 22690382  | 22691501  | 1120   | 2   | 1.674635  | 0.115363 | 22690146  | 22690619  | 22691088  | 2269191:  |
| 433 NA10847 | [2515685 chr22 | 22 | 22695407  | 22715094  | 19688  | 24  | 0.986928  | 0.037697 | 22695112  | 22695703  | 22714777  | 2271541:  |
| 434 NA10847 | [2515685 chr22 | 22 | 33619409  | 33622591  | 3183   | 4   | 0.831752  | 0.077139 | 33618939  | 33619879  | 33622541  | 3362264:  |
| 435 NA10847 | [2515685 chr22 | 22 | 37617530  | 37624010  | 6481   | 8   | -0.847389 | 0.057358 | 37616333  | 37618728  | 37621331  | 3762705:  |
| 436 NA10847 | [2515685 chr22 | 22 | 37683358  | 37711759  | 28402  | 27  | -0.678991 | 0.028235 | 37683063  | 37683653  | 37711022  | 3771249:  |
| 437 NA10847 | [2515685 chr22 | 22 | 41235714  | 41274269  | 38556  | 27  | 0.263408  | 0.027945 | 41235467  | 41235962  | 41274060  | 4127447:  |
| 1 NA18972   | [2515685 chr1  | 1  | 17608     | 20340     | 2733   | 6   | 0.34237   | 0.066968 | 17608     | 17608     | 20153     | 20527     |
| 2 NA18972   | [2515685 chr1  | 1  | 34112     | 92337     | 58226  | 59  | 0.406978  | 0.021363 | 32536     | 35688     | 90508     | 94167     |
| 3 NA18972   | [2515685 chr1  | 1  | 484244    | 489189    | 4946   | 9   | -0.28742  | 0.054679 | 483725    | 484764    | 487412    | 490967    |
| 4 NA18972   | [2515685 chr1  | 1  | 500887    | 508112    | 7226   | 11  | 0.319192  | 0.049459 | 500092    | 501683    | 506934    | 509291    |
| 5 NA18972   | [2515685 chr1  | 1  | 585234    | 612159    | 26926  | 17  | -0.406774 | 0.039785 | 584191    | 586277    | 610122    | 614196    |
| 6 NA18972   | [2515685 chr1  | 1  | 811114    | 830474    | 19361  | 29  | 0.412034  | 0.030461 | 811037    | 811192    | 830045    | 83090:    |
| 7 NA18972   | [2515685 chr1  | 1  | 881393    | 888710    | 7318   | 12  | 0.461712  | 0.047675 | 881205    | 881582    | 888229    | 88919:    |
| 8 NA18972   | [2515685 chr1  | 1  | 1267199   | 1272598   | 5400   | 7   | -0.329654 | 0.062123 | 1266920   | 1267479   | 1271853   | 127334:   |
| 9 NA18972   | [2515685 chr1  | 1  | 10416438  | 10418311  | 1874   | 2   | -0.863804 | 0.115994 | 10415863  | 10417014  | 10417712  | 1041891:  |
| 10 NA18972  | [2515685 chr1  | 1  | 12785372  | 12790585  | 5214   | 12  | 0.353819  | 0.047354 | 12785195  | 12785549  | 12790241  | 1279092:  |
| 11 NA18972  | [2515685 chr1  | 1  | 12829124  | 12904820  | 75697  | 123 | 0.423543  | 0.014872 | 12828579  | 12829669  | 12904685  | 1290495:  |
| 12 NA18972  | [2515685 chr1  | 1  | 12920499  | 12922237  | 1739   | 5   | 0.520761  | 0.073628 | 12920302  | 12920697  | 12922188  | 1292228:  |
| 13 NA18972  | [2515685 chr1  | 1  | 12986861  | 12989178  | 2318   | 5   | 0.390734  | 0.074038 | 12986556  | 12987167  | 12988900  | 1298945:  |
| 14 NA18972  | [2515685 chr1  | 1  | 12995178  | 13014231  | 19054  | 25  | 0.425007  | 0.03282  | 12994551  | 12995806  | 13013335  | 130151:   |
| 15 NA18972  | [2515685 chr1  | 1  | 13075373  | 13096719  | 21347  | 31  | -0.252302 | 0.029506 | 13075187  | 13075559  | 13096700  | 1309673:  |
| 16 NA18972  | [2515685 chr1  | 1  | 13122036  | 13130103  | 8068   | 17  | 0.33783   | 0.039846 | 13121175  | 13122897  | 13129330  | 1313087:  |
| 17 NA18972  | [2515685 chr1  | 1  | 13144855  | 13156534  | 11680  | 18  | 0.367669  | 0.038664 | 13142107  | 13147604  | 13156300  | 1315676:  |
| 18 NA18972  | [2515685 chr1  | 1  | 13158620  | 13159168  | 549    | 2   | 0.895465  | 0.116647 | 13158367  | 13158874  | 13158889  | 1315944:  |
| 19 NA18972  | [2515685 chr1  | 1  | 13159940  | 13165991  | 6052   | 10  | 0.467689  | 0.051873 | 13159618  | 13160263  | 13165683  | 1316630:  |
| 20 NA18972  | [2515685 chr1  | 1  | 13175736  | 13197672  | 21937  | 15  | 0.404027  | 0.042354 | 13175341  | 13176132  | 13197496  | 1319784:  |
| 21 NA18972  | [2515685 chr1  | 1  | 13365652  | 13377331  | 11680  | 18  | 0.367669  | 0.038664 | 13362904  | 13368401  | 13377097  | 1337756:  |
| 22 NA18972  | [2515685 chr1  | 1  | 13379417  | 13379965  | 549    | 2   | 0.895465  | 0.116647 | 13379164  | 13379671  | 13379686  | 1338024:  |
| 23 NA18972  | [2515685 chr1  | 1  | 13380737  | 13386788  | 6052   | 10  | 0.467689  | 0.051873 | 13380415  | 13381060  | 13386480  | 1338709:  |
| 24 NA18972  | [2515685 chr1  | 1  | 13396533  | 13418527  | 21995  | 15  | 0.404027  | 0.042354 | 13396138  | 13396929  | 13418351  | 1341870:  |
| 25 NA18972  | [2515685 chr1  | 1  | 16562474  | 16577498  | 15025  | 12  | -0.250122 | 0.047354 | 16561567  | 16563381  | 16577091  | 1657790:  |
| 26 NA18972  | [2515685 chr1  | 1  | 16721663  | 16727887  | 6225   | 12  | 0.313516  | 0.047354 | 16721348  | 16721979  | 16727506  | 1672826:  |
| 27 NA18972  | [2515685 chr1  | 1  | 16983252  | 17005532  | 22281  | 25  | -0.458868 | 0.033428 | 16982953  | 16983552  | 17006416  | 1700644:  |
| 28 NA18972  | [2515685 chr1  | 1  | 21875574  | 21882963  | 7390   | 2   | 0.59914   | 0.115992 | 21873884  | 21877264  | 21882649  | 2188327:  |
| 29 NA18972  | [2515685 chr1  | 1  | 22055126  | 22083382  | 28257  | 19  | -0.482556 | 0.037737 | 22054832  | 22055421  | 22081996  | 2208476:  |
| 30 NA18972  | [2515685 chr1  | 1  | 25329658  | 25444884  | 115227 | 121 | 0.302844  | 0.015021 | 25329374  | 25329943  | 25442437  | 2544733:  |
| 31 NA18972  | [2515685 chr1  | 1  | 38797630  | 38806865  | 9236   | 9   | -0.859982 | 0.056877 | 38797429  | 38797831  | 38806292  | 3880743:  |
| 32 NA18972  | [2515685 chr1  | 1  | 46064741  | 46076503  | 11763  | 9   | 0.289723  | 0.05468  | 46064481  | 46065002  | 46073170  | 4608979:  |
| 33 NA18972  | [2515685 chr1  | 1  | 53196717  | 53199508  | 2792   | 2   | 0.841222  | 0.146234 | 53195495  | 53197939  | 53198434  | 5320058:  |
| 34 NA18972  | [2515685 chr1  | 1  | 67504848  | 67507893  | 3046   | 5   | 0.410137  | 0.075984 | 67504414  | 67505283  | 67507595  | 6750819:  |
| 35 NA18972  | [2515685 chr1  | 1  | 72478372  | 72524180  | 45809  | 36  | -3.250578 | 0.052453 | 72478140  | 72478604  | 72523661  | 7252470:  |
| 36 NA18972  | [2515685 chr1  | 1  | 89188117  | 89190762  | 2646   | 5   | 2.123824  | 0.103979 | 89187764  | 89188470  | 89190458  | 8919106:  |
| 37 NA18972  | [2515685 chr1  | 1  | 103827497 | 103834166 | 6670   | 16  | 0.895309  | 0.041734 | 103827175 | 103827820 | 103833999 | 10383433: |

|            |               |   |           |           |        |     |           |          |           |           |           |          |
|------------|---------------|---|-----------|-----------|--------|-----|-----------|----------|-----------|-----------|-----------|----------|
| 38 NA18972 | [2515685 chr1 | 1 | 103848232 | 103866317 | 18086  | 26  | 1.182317  | 0.010456 | 103842566 | 103851565 | 103865345 | 10386729 |
| 39 NA18972 | [2515685 chr1 | 1 | 103873304 | 104015739 | 142436 | 223 | 1.182317  | 0.010456 | 103873021 | 103873587 | 104013178 | 10401830 |
| 40 NA18972 | [2515685 chr1 | 1 | 104027802 | 104029695 | 1894   | 2   | 0.924429  | 0.119163 | 104027515 | 104028090 | 104028575 | 10403081 |
| 41 NA18972 | [2515685 chr1 | 1 | 105728161 | 105735462 | 7302   | 8   | -0.921793 | 0.063729 | 105727820 | 105728503 | 105734532 | 10573639 |
| 42 NA18972 | [2515685 chr1 | 1 | 108514938 | 108565175 | 50238  | 57  | 0.460883  | 0.021763 | 108514864 | 108515012 | 108565023 | 10856532 |
| 43 NA18972 | [2515685 chr1 | 1 | 108638096 | 108688767 | 50672  | 58  | 0.467759  | 0.021583 | 108637939 | 108638254 | 108688693 | 10868884 |
| 44 NA18972 | [2515685 chr1 | 1 | 109933252 | 109935157 | 1906   | 3   | 0.692849  | 0.096257 | 109932716 | 109933789 | 109935040 | 10993527 |
| 45 NA18972 | [2515685 chr1 | 1 | 109936541 | 109953240 | 16700  | 21  | 0.973261  | 0.03758  | 109935803 | 109937279 | 109952761 | 10995372 |
| 46 NA18972 | [2515685 chr1 | 1 | 109954457 | 109969406 | 14950  | 12  | 0.545654  | 0.049446 | 109954248 | 109954666 | 109969060 | 10996975 |
| 47 NA18972 | [2515685 chr1 | 1 | 116870606 | 116915240 | 44635  | 54  | -0.289499 | 0.022332 | 116869172 | 116872040 | 116914887 | 11691559 |
| 48 NA18972 | [2515685 chr1 | 1 | 120263820 | 120342752 | 78933  | 118 | 0.317815  | 0.015101 | 120263381 | 120264260 | 120342542 | 12034296 |
| 49 NA18972 | [2515685 chr1 | 1 | 120515445 | 120515724 | 280    | 2   | 0.70243   | 0.116337 | 120515195 | 120515695 | 120515718 | 12051573 |
| 50 NA18972 | [2515685 chr1 | 1 | 120622555 | 120644841 | 22287  | 38  | 0.305749  | 0.026611 | 120622342 | 120622769 | 120644575 | 12064510 |
| 51 NA18972 | [2515685 chr1 | 1 | 141384743 | 141390451 | 5709   | 11  | 0.36034   | 0.049459 | 120962965 | 141388076 | 141390441 | 14139046 |
| 52 NA18972 | [2515685 chr1 | 1 | 141404455 | 141404735 | 281    | 2   | 0.70243   | 0.116337 | 141404449 | 141404462 | 141404485 | 14140498 |
| 53 NA18972 | [2515685 chr1 | 1 | 141902518 | 141981914 | 79397  | 173 | 0.296826  | 0.012512 | 141902175 | 141902861 | 141978581 | 14203010 |
| 54 NA18972 | [2515685 chr1 | 1 | 142079904 | 142102147 | 22244  | 45  | 0.29111   | 0.0246   | 142079386 | 142080422 | 142099900 | 14210439 |
| 55 NA18972 | [2515685 chr1 | 1 | 142439523 | 142569435 | 129913 | 153 | 0.400939  | 0.013272 | 142439104 | 142439942 | 142568775 | 14257009 |
| 56 NA18972 | [2515685 chr1 | 1 | 142678373 | 142775572 | 97200  | 153 | 0.29302   | 0.013303 | 142678163 | 142678583 | 142775363 | 14277578 |
| 57 NA18972 | [2515685 chr1 | 1 | 145028373 | 145117170 | 88798  | 209 | 0.282741  | 0.011363 | 145027856 | 145028891 | 145116569 | 14511777 |
| 58 NA18972 | [2515685 chr1 | 1 | 145375735 | 145418414 | 42680  | 79  | 0.289598  | 0.018456 | 145375681 | 145375789 | 145418405 | 14541842 |
| 59 NA18972 | [2515685 chr1 | 1 | 145537779 | 145579156 | 41378  | 69  | 0.28686   | 0.019748 | 145537725 | 145537833 | 145578788 | 14557952 |
| 60 NA18972 | [2515685 chr1 | 1 | 145814302 | 146405169 | 590868 | 681 | 0.250554  | 0.006299 | 145812747 | 145815857 | 146404827 | 14640551 |
| 61 NA18972 | [2515685 chr1 | 1 | 148998878 | 149005918 | 7041   | 13  | 0.685451  | 0.045497 | 148998401 | 148999355 | 149004680 | 14900715 |
| 62 NA18972 | [2515685 chr1 | 1 | 149380111 | 149401669 | 21559  | 22  | 0.874303  | 0.035579 | 149369038 | 149383444 | 149399791 | 14940354 |
| 63 NA18972 | [2515685 chr1 | 1 | 149573821 | 149583431 | 9611   | 5   | 0.972965  | 0.076265 | 149573460 | 149574182 | 149582912 | 14958395 |
| 64 NA18972 | [2515685 chr1 | 1 | 158224068 | 158225480 | 1413   | 2   | -0.811312 | 0.115993 | 158223552 | 158224584 | 158225276 | 15822568 |
| 65 NA18972 | [2515685 chr1 | 1 | 158231105 | 158232881 | 1777   | 2   | -0.811312 | 0.115993 | 158230227 | 158231984 | 158232676 | 15823308 |
| 66 NA18972 | [2515685 chr1 | 1 | 158245896 | 158247672 | 1777   | 2   | -0.811312 | 0.115993 | 158245018 | 158246775 | 158247467 | 15824787 |
| 67 NA18972 | [2515685 chr1 | 1 | 158253277 | 158255053 | 1777   | 2   | -0.811312 | 0.115993 | 158252398 | 158254156 | 158254848 | 15825525 |
| 68 NA18972 | [2515685 chr1 | 1 | 192541700 | 192547982 | 6283   | 3   | -0.486457 | 0.094708 | 192541312 | 192542088 | 192547786 | 19254817 |
| 69 NA18972 | [2515685 chr1 | 1 | 193443495 | 193447535 | 4041   | 5   | 0.371833  | 0.07336  | 193443280 | 193443710 | 193446915 | 19344815 |
| 70 NA18972 | [2515685 chr1 | 1 | 193448820 | 193555075 | 106256 | 88  | 0.586817  | 0.017996 | 193448631 | 193449010 | 193554890 | 19355526 |
| 71 NA18972 | [2515685 chr1 | 1 | 193631089 | 193650443 | 19355  | 14  | 0.330742  | 0.043904 | 193630899 | 193631279 | 193650245 | 19365064 |
| 72 NA18972 | [2515685 chr1 | 1 | 218762650 | 218771442 | 8793   | 8   | 0.511856  | 0.058487 | 218762212 | 218763089 | 218771135 | 21877175 |
| 73 NA18972 | [2515685 chr1 | 1 | 220666898 | 220688251 | 21354  | 12  | 0.251925  | 0.048206 | 220666678 | 220667119 | 220686744 | 22068975 |
| 74 NA18972 | [2515685 chr1 | 1 | 236719047 | 236720968 | 1922   | 3   | -0.972778 | 0.115293 | 236718751 | 236719344 | 236720749 | 23672118 |
| 75 NA18972 | [2515685 chr1 | 1 | 239368545 | 239425278 | 56734  | 7   | -0.41788  | 0.062001 | 239368239 | 239368851 | 239421945 | 23942949 |
| 76 NA18972 | [2515685 chr2 | 2 | 296456    | 298925    | 2470   | 8   | -0.725981 | 0.057996 | 296213    | 296699    | 298661    | 299185   |
| 77 NA18972 | [2515685 chr2 | 2 | 388500    | 390704    | 2205   | 6   | -0.787276 | 0.067343 | 387915    | 389086    | 390173    | 391236   |
| 78 NA18972 | [2515685 chr2 | 2 | 34606415  | 34644794  | 38380  | 39  | 0.837344  | 0.027088 | 34601818  | 34609397  | 34641812  | 3464839  |
| 79 NA18972 | [2515685 chr2 | 2 | 35179771  | 35181261  | 1491   | 2   | 0.653079  | 0.125    | 35178922  | 35180620  | 35181043  | 3518147  |
| 80 NA18972 | [2515685 chr2 | 2 | 35896448  | 35905961  | 9514   | 3   | -3.610386 | 0.159111 | 35879425  | 35899430  | 35902979  | 3590982  |
| 81 NA18972 | [2515685 chr2 | 2 | 35962493  | 35963578  | 1086   | 2   | -0.59909  | 0.118947 | 35962001  | 35962986  | 35963398  | 3596375  |
| 82 NA18972 | [2515685 chr2 | 2 | 37869648  | 37911473  | 41826  | 43  | -0.429361 | 0.02509  | 37869077  | 37870220  | 37911214  | 3791173  |
| 83 NA18972 | [2515685 chr2 | 2 | 50699730  | 50746676  | 46947  | 40  | -0.933207 | 0.02708  | 50697981  | 50701480  | 50746090  | 5074726  |
| 84 NA18972 | [2515685 chr2 | 2 | 51684618  | 51691082  | 6465   | 7   | 0.396488  | 0.062391 | 51684369  | 51684868  | 51690780  | 5169138  |
| 85 NA18972 | [2515685 chr2 | 2 | 52661573  | 52696869  | 35297  | 26  | -0.945622 | 0.033419 | 52661218  | 52661928  | 52696416  | 5269732  |
| 86 NA18972 | [2515685 chr2 | 2 | 57217063  | 57229973  | 12911  | 12  | 0.250202  | 0.048227 | 57216746  | 57217380  | 57229791  | 5723015  |
| 87 NA18972 | [2515685 chr2 | 2 | 71254096  | 71259851  | 5756   | 7   | -0.723814 | 0.062621 | 71253721  | 71254472  | 71259334  | 7126036  |
| 88 NA18972 | [2515685 chr2 | 2 | 73926147  | 73945080  | 18934  | 24  | -0.326777 | 0.033484 | 73925556  | 73926738  | 73945012  | 7394514  |
| 89 NA18972 | [2515685 chr2 | 2 | 75296507  | 75298934  | 2428   | 2   | 0.704389  | 0.117293 | 75296056  | 75296959  | 75298532  | 7529933  |
| 90 NA18972 | [2515685 chr2 | 2 | 77867444  | 77869516  | 2073   | 2   | -0.602549 | 0.115992 | 77867055  | 77867833  | 77869130  | 7786990  |
| 91 NA18972 | [2515685 chr2 | 2 | 87052304  | 87060939  | 8636   | 13  | 0.258987  | 0.045496 | 87052061  | 87052547  | 87060522  | 8706135  |
| 92 NA18972 | [2515685 chr2 | 2 | 87474786  | 87476071  | 1286   | 4   | -0.475155 | 0.082019 | 87474526  | 87475047  | 87475704  | 8747643  |



|             |               |   |           |           |        |     |           |          |           |           |           |          |
|-------------|---------------|---|-----------|-----------|--------|-----|-----------|----------|-----------|-----------|-----------|----------|
| 93 NA18972  | [2515685 chr2 | 2 | 87964549  | 88098957  | 134409 | 12  | 0.386109  | 0.048108 | 87964512  | 87964586  | 88097049  | 88100861 |
| 94 NA18972  | [2515685 chr2 | 2 | 88120146  | 88126839  | 6694   | 12  | 0.267683  | 0.047425 | 88119849  | 88120444  | 88126458  | 88127221 |
| 95 NA18972  | [2515685 chr2 | 2 | 91093851  | 91099723  | 5873   | 21  | -0.25004  | 0.035796 | 91093617  | 91094086  | 91099570  | 91099871 |
| 96 NA18972  | [2515685 chr2 | 2 | 94850556  | 94878176  | 27621  | 17  | -0.346025 | 0.039785 | 94850330  | 94850783  | 94877811  | 94878541 |
| 97 NA18972  | [2515685 chr2 | 2 | 97184386  | 97189764  | 5379   | 2   | -0.76372  | 0.115992 | 97182781  | 97185992  | 97186782  | 97196721 |
| 98 NA18972  | [2515685 chr2 | 2 | 97613796  | 97614932  | 1137   | 2   | 1.355988  | 0.128986 | 97613553  | 97614040  | 97614467  | 97615391 |
| 99 NA18972  | [2515685 chr2 | 2 | 106339466 | 106344320 | 4855   | 6   | -0.711409 | 0.072279 | 106339069 | 106339864 | 106344055 | 10634458 |
| 100 NA18972 | [2515685 chr2 | 2 | 108313968 | 108314875 | 908    | 2   | 0.83809   | 0.116705 | 108313664 | 108314272 | 108314680 | 10831507 |
| 101 NA18972 | [2515685 chr2 | 2 | 113904325 | 113911583 | 7259   | 15  | 0.289221  | 0.042355 | 113904090 | 113904561 | 113911220 | 11391194 |
| 102 NA18972 | [2515685 chr2 | 2 | 114056817 | 114061061 | 4245   | 8   | 0.333451  | 0.057996 | 114056657 | 114056977 | 114060697 | 11406142 |
| 103 NA18972 | [2515685 chr2 | 2 | 123193457 | 123198547 | 5091   | 4   | -0.842689 | 0.082987 | 123193121 | 123193793 | 123198337 | 12319875 |
| 104 NA18972 | [2515685 chr2 | 2 | 126159437 | 126168349 | 8913   | 3   | -0.85623  | 0.095677 | 126158494 | 126160381 | 126168048 | 12616865 |
| 105 NA18972 | [2515685 chr2 | 2 | 129354604 | 129360182 | 5579   | 4   | -0.871677 | 0.085452 | 129354317 | 129354892 | 129357659 | 12936270 |
| 106 NA18972 | [2515685 chr2 | 2 | 130405124 | 130482797 | 77674  | 91  | -0.292886 | 0.017258 | 130405077 | 130405172 | 130482453 | 13048314 |
| 107 NA18972 | [2515685 chr2 | 2 | 130525542 | 130546603 | 21062  | 34  | -0.289405 | 0.028132 | 130525010 | 130526075 | 130545745 | 13054746 |
| 108 NA18972 | [2515685 chr2 | 2 | 130685476 | 130688814 | 3339   | 6   | 0.445939  | 0.066968 | 130685199 | 130685753 | 130688567 | 13068906 |
| 109 NA18972 | [2515685 chr2 | 2 | 130916731 | 130935021 | 18291  | 38  | -0.279817 | 0.026611 | 130916351 | 130917112 | 130934317 | 13093572 |
| 110 NA18972 | [2515685 chr2 | 2 | 130971559 | 130978018 | 6460   | 15  | -0.313383 | 0.042355 | 130971399 | 130971719 | 130977852 | 13097818 |
| 111 NA18972 | [2515685 chr2 | 2 | 131252332 | 131269919 | 17588  | 31  | -0.281961 | 0.029462 | 131251627 | 131253037 | 131269538 | 13127030 |
| 112 NA18972 | [2515685 chr2 | 2 | 131765052 | 131784546 | 19495  | 30  | -0.43991  | 0.029949 | 131749458 | 131768034 | 131783971 | 13178512 |
| 113 NA18972 | [2515685 chr2 | 2 | 131815930 | 131821770 | 5841   | 15  | -0.34439  | 0.042355 | 131815635 | 131816225 | 131821605 | 13182193 |
| 114 NA18972 | [2515685 chr2 | 2 | 131857444 | 131876658 | 19215  | 31  | -0.261844 | 0.029462 | 131856572 | 131858317 | 131876312 | 13187700 |
| 115 NA18972 | [2515685 chr2 | 2 | 131899666 | 131908220 | 8555   | 14  | -0.311544 | 0.043841 | 131899373 | 131899960 | 131908037 | 13190840 |
| 116 NA18972 | [2515685 chr2 | 2 | 131918222 | 131952657 | 34436  | 46  | -0.29491  | 0.024209 | 131918096 | 131918348 | 131952315 | 13195299 |
| 117 NA18972 | [2515685 chr2 | 2 | 132127472 | 132131409 | 3938   | 2   | -0.594352 | 0.115993 | 132127160 | 132127784 | 132128427 | 13213581 |
| 118 NA18972 | [2515685 chr2 | 2 | 132142907 | 132183108 | 40202  | 31  | -0.363163 | 0.02948  | 132141027 | 132144787 | 132183048 | 13218316 |
| 119 NA18972 | [2515685 chr2 | 2 | 132234434 | 132323057 | 88624  | 113 | -0.385069 | 0.01547  | 132234255 | 132234614 | 132322825 | 13232329 |
| 120 NA18972 | [2515685 chr2 | 2 | 132334309 | 132340886 | 6578   | 5   | -0.528388 | 0.07336  | 132333497 | 132335122 | 132340628 | 13234114 |
| 121 NA18972 | [2515685 chr2 | 2 | 132351081 | 132352460 | 1380   | 2   | -0.599504 | 0.115993 | 132350732 | 132351431 | 132352084 | 13235283 |
| 122 NA18972 | [2515685 chr2 | 2 | 132627490 | 132630364 | 2875   | 5   | -0.368102 | 0.07336  | 132627063 | 132627918 | 132630124 | 13263060 |
| 123 NA18972 | [2515685 chr2 | 2 | 132789932 | 132790674 | 743    | 2   | 0.648921  | 0.115992 | 132789529 | 132790336 | 132790336 | 13279101 |
| 124 NA18972 | [2515685 chr2 | 2 | 132871108 | 132873051 | 1944   | 3   | -0.576744 | 0.096102 | 132870911 | 132871306 | 132872791 | 13287331 |
| 125 NA18972 | [2515685 chr2 | 2 | 133150179 | 133163479 | 13301  | 9   | -0.354691 | 0.054915 | 133149969 | 133150389 | 133161737 | 13316522 |
| 126 NA18972 | [2515685 chr2 | 2 | 146694116 | 146710744 | 16629  | 17  | -2.931256 | 0.072751 | 146688620 | 146697098 | 146710557 | 14671093 |
| 127 NA18972 | [2515685 chr2 | 2 | 153622711 | 153625256 | 2546   | 3   | 1.051154  | 0.095222 | 153621175 | 153624247 | 153625088 | 15362542 |
| 128 NA18972 | [2515685 chr2 | 2 | 195804965 | 195809805 | 4841   | 5   | -0.733258 | 0.078184 | 195803577 | 195806354 | 195809355 | 19581025 |
| 129 NA18972 | [2515685 chr2 | 2 | 208176479 | 208184457 | 7979   | 7   | 0.877676  | 0.063731 | 208176093 | 208176865 | 208183930 | 20818498 |
| 130 NA18972 | [2515685 chr2 | 2 | 220210709 | 220212384 | 1676   | 2   | 0.645487  | 0.115992 | 220210455 | 220210963 | 220211965 | 22021280 |
| 131 NA18972 | [2515685 chr2 | 2 | 242664580 | 242668683 | 4104   | 9   | 1.188166  | 0.054684 | 242664284 | 242664877 | 242668532 | 24266883 |
| 132 NA18972 | [2515685 chr3 | 3 | 149944    | 152369    | 2426   | 4   | 0.489614  | 0.082019 | 148712    | 151176    | 151848    | 152890   |
| 133 NA18972 | [2515685 chr3 | 3 | 154057    | 157210    | 3154   | 3   | -0.626955 | 0.094707 | 153604    | 154511    | 156642    | 157775   |
| 134 NA18972 | [2515685 chr3 | 3 | 587432    | 638425    | 50994  | 44  | -0.306225 | 0.02473  | 586921    | 587943    | 638149    | 638701   |
| 135 NA18972 | [2515685 chr3 | 3 | 1757211   | 1765741   | 8531   | 2   | 0.833524  | 0.123329 | 1756096   | 1758327   | 1762058   | 1797300  |
| 136 NA18972 | [2515685 chr3 | 3 | 2384125   | 2385512   | 1388   | 2   | -0.630612 | 0.117018 | 2383730   | 2384521   | 2385090   | 2385931  |
| 137 NA18972 | [2515685 chr3 | 3 | 16213841  | 16219504  | 5664   | 5   | -0.393942 | 0.07336  | 16213419  | 16214264  | 16219256  | 16219751 |
| 138 NA18972 | [2515685 chr3 | 3 | 50888459  | 50888513  | 55     | 2   | 1.160673  | 0.12328  | 50888445  | 50888474  | 50888495  | 50888531 |
| 139 NA18972 | [2515685 chr3 | 3 | 75847165  | 75879788  | 32624  | 20  | -0.525224 | 0.03668  | 75845474  | 75848856  | 75876105  | 75891771 |
| 140 NA18972 | [2515685 chr3 | 3 | 76066312  | 76081451  | 15140  | 19  | -0.282987 | 0.037633 | 76065787  | 76066838  | 76081180  | 76081721 |
| 141 NA18972 | [2515685 chr3 | 3 | 105760262 | 105762355 | 2094   | 2   | -0.893695 | 0.121014 | 105759634 | 105760890 | 105761424 | 10576328 |
| 142 NA18972 | [2515685 chr3 | 3 | 122794775 | 122796435 | 1661   | 2   | 0.646003  | 0.117203 | 122794406 | 122795145 | 122796216 | 12279665 |
| 143 NA18972 | [2515685 chr3 | 3 | 126965775 | 126976147 | 10373  | 9   | -0.336962 | 0.054679 | 126964448 | 126967103 | 126972846 | 12697944 |
| 144 NA18972 | [2515685 chr3 | 3 | 127155218 | 127158873 | 3656   | 6   | -0.580683 | 0.067181 | 127155047 | 127155390 | 127158237 | 12715950 |
| 145 NA18972 | [2515685 chr3 | 3 | 129611885 | 129620741 | 8857   | 13  | -0.293753 | 0.045496 | 129611430 | 129612340 | 129620317 | 12962116 |
| 146 NA18972 | [2515685 chr3 | 3 | 131202807 | 131207291 | 4485   | 11  | -0.331138 | 0.049459 | 131202638 | 131202976 | 131206953 | 13120762 |
| 147 NA18972 | [2515685 chr3 | 3 | 133191392 | 133196576 | 5185   | 5   | -0.929188 | 0.074176 | 133190820 | 133191965 | 133195824 | 13319732 |

|             |               |   |           |           |        |     |           |          |           |           |           |           |
|-------------|---------------|---|-----------|-----------|--------|-----|-----------|----------|-----------|-----------|-----------|-----------|
| 148 NA18972 | [2515685 chr3 | 3 | 164006076 | 164088680 | 82605  | 82  | -0.402748 | 0.044188 | 164005882 | 164006270 | 164088390 | 16408897  |
| 149 NA18972 | [2515685 chr3 | 3 | 164199936 | 164204121 | 4186   | 5   | -0.862613 | 0.076544 | 164199686 | 164200187 | 164203568 | 16420467  |
| 150 NA18972 | [2515685 chr3 | 3 | 190853967 | 190855771 | 1805   | 2   | 0.655315  | 0.119945 | 190853765 | 190854169 | 190855064 | 19085647  |
| 151 NA18972 | [2515685 chr3 | 3 | 191219813 | 191223326 | 3514   | 4   | 0.814634  | 0.084534 | 191219291 | 191220336 | 191222918 | 19122373  |
| 152 NA18972 | [2515685 chr3 | 3 | 192547312 | 192554331 | 7020   | 10  | 0.974589  | 0.053327 | 192546950 | 192547674 | 192554127 | 19255453  |
| 153 NA18972 | [2515685 chr3 | 3 | 192558919 | 192560590 | 1672   | 3   | 0.524419  | 0.098364 | 192558727 | 192559112 | 192560293 | 19256088  |
| 154 NA18972 | [2515685 chr3 | 3 | 196036738 | 196038413 | 1676   | 2   | 0.619061  | 0.115994 | 196036106 | 196037370 | 196037923 | 19603890  |
| 155 NA18972 | [2515685 chr3 | 3 | 196679304 | 196713768 | 34465  | 36  | 0.631302  | 0.027356 | 196677636 | 196680972 | 196711768 | 19671576  |
| 156 NA18972 | [2515685 chr3 | 3 | 196946678 | 196958848 | 12171  | 10  | -0.499157 | 0.051873 | 196946096 | 196947261 | 196956437 | 19696126  |
| 157 NA18972 | [2515685 chr3 | 3 | 196994475 | 197002965 | 8491   | 10  | 0.787414  | 0.051994 | 196994054 | 196994896 | 197002044 | 19700388  |
| 158 NA18972 | [2515685 chr3 | 3 | 198674426 | 198675470 | 1045   | 6   | -0.362593 | 0.066968 | 198674161 | 198674692 | 198674903 | 19867603  |
| 159 NA18972 | [2515685 chr3 | 3 | 198957357 | 198959057 | 1701   | 2   | 0.599536  | 0.118324 | 198956684 | 198958031 | 198958824 | 19895929  |
| 160 NA18972 | [2515685 chr3 | 3 | 199218619 | 199221999 | 3381   | 12  | 0.346049  | 0.047354 | 199218354 | 199218884 | 199220440 | 19922355  |
| 161 NA18972 | [2515685 chr3 | 3 | 199313925 | 199321063 | 7139   | 15  | -0.719129 | 0.042407 | 199313515 | 199314336 | 199320844 | 19932128  |
| 162 NA18972 | [2515685 chr4 | 4 | 742050    | 745315    | 3266   | 4   | -0.505406 | 0.082019 | 741832    | 742268    | 745035    | 745595    |
| 163 NA18972 | [2515685 chr4 | 4 | 3705325   | 3708427   | 3103   | 5   | -0.508246 | 0.07336  | 3704944   | 3705707   | 3708109   | 3708745   |
| 164 NA18972 | [2515685 chr4 | 4 | 3853958   | 3855414   | 1457   | 2   | 0.701026  | 0.116451 | 3853163   | 3854754   | 3855199   | 3855625   |
| 165 NA18972 | [2515685 chr4 | 4 | 8740456   | 8756949   | 16494  | 23  | 0.828748  | 0.034204 | 8740049   | 8740864   | 8756813   | 8757086   |
| 166 NA18972 | [2515685 chr4 | 4 | 8999137   | 9045340   | 46204  | 46  | 1.168433  | 0.024508 | 8849955   | 9002239   | 9044948   | 9045733   |
| 167 NA18972 | [2515685 chr4 | 4 | 9068515   | 9082725   | 14211  | 17  | -0.274559 | 0.039785 | 9067918   | 9069112   | 9082367   | 9083084   |
| 168 NA18972 | [2515685 chr4 | 4 | 9208389   | 9220214   | 11826  | 13  | -0.302228 | 0.045496 | 9207638   | 9209141   | 9219938   | 9220497   |
| 169 NA18972 | [2515685 chr4 | 4 | 9812346   | 9813108   | 763    | 33  | 1.166556  | 0.028556 | 9812284   | 9812408   | 9812952   | 9813265   |
| 170 NA18972 | [2515685 chr4 | 4 | 9887220   | 9911397   | 24178  | 29  | 2.928023  | 0.051062 | 9886886   | 9887555   | 9910388   | 9912407   |
| 171 NA18972 | [2515685 chr4 | 4 | 34602797  | 34650994  | 48198  | 45  | 0.876314  | 0.025334 | 34601994  | 34603600  | 34649535  | 3465245   |
| 172 NA18972 | [2515685 chr4 | 4 | 49002144  | 49003465  | 1322   | 8   | -0.333513 | 0.057996 | 49002100  | 49002189  | 49003383  | 49003541  |
| 173 NA18972 | [2515685 chr4 | 4 | 49022294  | 49082383  | 60090  | 92  | -0.312912 | 0.017115 | 49022202  | 49022387  | 49082282  | 49082481  |
| 174 NA18972 | [2515685 chr4 | 4 | 49399654  | 49471674  | 72021  | 104 | -0.313789 | 0.016173 | 49399649  | 49399660  | 49471630  | 49471711  |
| 175 NA18972 | [2515685 chr4 | 4 | 58094409  | 58103329  | 8921   | 9   | -0.763258 | 0.056126 | 58090798  | 58097511  | 58102479  | 58104181  |
| 176 NA18972 | [2515685 chr4 | 4 | 63500338  | 63504889  | 4552   | 5   | -4.465453 | 0.178042 | 63494261  | 63503440  | 63504639  | 63505141  |
| 177 NA18972 | [2515685 chr4 | 4 | 70114479  | 70115496  | 1018   | 2   | 0.711655  | 0.121153 | 70114252  | 70114707  | 70115202  | 70115791  |
| 178 NA18972 | [2515685 chr4 | 4 | 115534174 | 115541546 | 7373   | 9   | -3.927626 | 0.12025  | 115530015 | 115537276 | 115539984 | 11554310  |
| 179 NA18972 | [2515685 chr4 | 4 | 115865203 | 115869517 | 4315   | 3   | -0.937855 | 0.099413 | 115864913 | 115865494 | 115866415 | 11587556  |
| 180 NA18972 | [2515685 chr4 | 4 | 119480784 | 119487782 | 6999   | 5   | -1.021086 | 0.073776 | 119473487 | 119483886 | 119487418 | 11948814  |
| 181 NA18972 | [2515685 chr4 | 4 | 124829810 | 124837199 | 7390   | 10  | -0.355612 | 0.052309 | 124829469 | 124830152 | 124836924 | 12483747  |
| 182 NA18972 | [2515685 chr4 | 4 | 125304905 | 125305983 | 1079   | 2   | 0.873719  | 0.121533 | 125304587 | 125305223 | 125305732 | 12530623  |
| 183 NA18972 | [2515685 chr4 | 4 | 138538055 | 138549906 | 11852  | 13  | 0.927183  | 0.049226 | 138537443 | 138538668 | 138547414 | 13855239  |
| 184 NA18972 | [2515685 chr4 | 4 | 145128782 | 145135747 | 6966   | 7   | 0.360556  | 0.06431  | 145128536 | 145129028 | 145135268 | 14513622  |
| 185 NA18972 | [2515685 chr4 | 4 | 145240980 | 145245588 | 4609   | 4   | -0.886471 | 0.092262 | 145240473 | 145241488 | 145245192 | 14524598  |
| 186 NA18972 | [2515685 chr4 | 4 | 145481362 | 145482703 | 1342   | 2   | 0.756292  | 0.119688 | 145481152 | 145481573 | 145482320 | 14548308  |
| 187 NA18972 | [2515685 chr4 | 4 | 153147415 | 153151949 | 4535   | 5   | -0.798476 | 0.074808 | 153146836 | 153147995 | 153151358 | 15315254  |
| 188 NA18972 | [2515685 chr4 | 4 | 162237272 | 162242562 | 5291   | 8   | -4.44627  | 0.136957 | 162236487 | 162238058 | 162242381 | 16224274  |
| 189 NA18972 | [2515685 chr4 | 4 | 162806038 | 162809269 | 3232   | 3   | -3.057671 | 0.151138 | 162804872 | 162807204 | 162808734 | 16280980  |
| 190 NA18972 | [2515685 chr4 | 4 | 169184442 | 169368370 | 183929 | 160 | 0.881752  | 0.013442 | 169184090 | 169184794 | 169366713 | 16937002  |
| 191 NA18972 | [2515685 chr4 | 4 | 172750241 | 172755216 | 4976   | 2   | -3.842122 | 0.313154 | 172748887 | 172751596 | 172753256 | 17275717  |
| 192 NA18972 | [2515685 chr4 | 4 | 173363594 | 173367718 | 4125   | 6   | -0.746645 | 0.067473 | 173362583 | 173364606 | 173367283 | 17336815  |
| 193 NA18972 | [2515685 chr4 | 4 | 173799832 | 173807357 | 7526   | 6   | -3.860054 | 0.15385  | 173799464 | 173800201 | 173804255 | 17381134  |
| 194 NA18972 | [2515685 chr4 | 4 | 185533276 | 185544849 | 11574  | 12  | 0.93007   | 0.048807 | 185532696 | 185533857 | 185543276 | 18554642  |
| 195 NA18972 | [2515685 chr4 | 4 | 186816951 | 186819359 | 2409   | 3   | 3.38119   | 0.186183 | 186816420 | 186817483 | 186819049 | 186819671 |
| 196 NA18972 | [2515685 chr4 | 4 | 187728494 | 187732907 | 4414   | 14  | 2.797368  | 0.0643   | 187728193 | 187728795 | 187732541 | 18773327  |
| 197 NA18972 | [2515685 chr4 | 4 | 188255523 | 188269680 | 14158  | 235 | 0.812199  | 0.010712 | 188255215 | 188255831 | 188269403 | 18826995  |
| 198 NA18972 | [2515685 chr4 | 4 | 189812041 | 189814133 | 2093   | 2   | -0.99229  | 0.124796 | 189811777 | 189812306 | 189813742 | 18981452  |
| 199 NA18972 | [2515685 chr4 | 4 | 190528602 | 190533163 | 4562   | 21  | -3.301411 | 0.0537   | 190528058 | 190529146 | 190531664 | 19053466  |
| 200 NA18972 | [2515685 chr4 | 4 | 190568762 | 190575314 | 6553   | 11  | -0.366958 | 0.049748 | 190568557 | 190568968 | 190574770 | 19057585  |
| 201 NA18972 | [2515685 chr4 | 4 | 190849236 | 191058214 | 208979 | 203 | 0.272191  | 0.011547 | 190848995 | 190849478 | 191057867 | 19105856  |
| 202 NA18972 | [2515685 chr4 | 4 | 191142404 | 191143596 | 1193   | 3   | -0.856689 | 0.094978 | 191142135 | 191142673 | 191143215 | 19114397  |

|             |               |   |           |           |        |     |           |          |           |           |           |           |
|-------------|---------------|---|-----------|-----------|--------|-----|-----------|----------|-----------|-----------|-----------|-----------|
| 203 NA18972 | [2515685 chr5 | 5 | 520743    | 521684    | 942    | 5   | 1.173787  | 0.078937 | 520428    | 521059    | 521427    | 521942    |
| 204 NA18972 | [2515685 chr5 | 5 | 701477    | 703842    | 2366   | 3   | -0.56187  | 0.094707 | 700923    | 702032    | 703012    | 704673    |
| 205 NA18972 | [2515685 chr5 | 5 | 731032    | 736702    | 5671   | 6   | 0.342977  | 0.066968 | 730880    | 731185    | 736452    | 736953    |
| 206 NA18972 | [2515685 chr5 | 5 | 747659    | 831951    | 84293  | 62  | 0.550804  | 0.015154 | 747575    | 747744    | 831222    | 832681    |
| 207 NA18972 | [2515685 chr5 | 5 | 838991    | 892859    | 53869  | 39  | 0.550804  | 0.015154 | 838907    | 839076    | 892653    | 893066    |
| 208 NA18972 | [2515685 chr5 | 5 | 896567    | 901102    | 4536   | 6   | 0.550804  | 0.015154 | 896470    | 896664    | 900078    | 902127    |
| 209 NA18972 | [2515685 chr5 | 5 | 1075284   | 1079920   | 4637   | 24  | 0.463646  | 0.033484 | 1074709   | 1075859   | 1079566   | 1080271   |
| 210 NA18972 | [2515685 chr5 | 5 | 1122995   | 1126517   | 3523   | 38  | 0.267304  | 0.026611 | 1122772   | 1123219   | 1126389   | 1126644   |
| 211 NA18972 | [2515685 chr5 | 5 | 1223248   | 1223930   | 683    | 5   | 0.976427  | 0.07336  | 1223057   | 1223439   | 1223854   | 1224007   |
| 212 NA18972 | [2515685 chr5 | 5 | 12863961  | 12873512  | 9552   | 14  | -0.879969 | 0.04689  | 12863778  | 12864144  | 12873198  | 12873827  |
| 213 NA18972 | [2515685 chr5 | 5 | 13266358  | 13271720  | 5363   | 5   | -0.827259 | 0.07562  | 13266097  | 13266620  | 13269856  | 13273581  |
| 214 NA18972 | [2515685 chr5 | 5 | 17570617  | 17644064  | 73448  | 332 | -0.752973 | 0.009024 | 17570551  | 17570684  | 17643754  | 17644371  |
| 215 NA18972 | [2515685 chr5 | 5 | 17664339  | 17667407  | 3069   | 7   | -0.64977  | 0.062001 | 17663984  | 17664695  | 17667174  | 17667647  |
| 216 NA18972 | [2515685 chr5 | 5 | 19410747  | 19412172  | 1426   | 3   | 0.831109  | 0.098663 | 19410189  | 19411305  | 19411980  | 19412361  |
| 217 NA18972 | [2515685 chr5 | 5 | 21517153  | 21532321  | 15169  | 31  | -0.413328 | 0.029462 | 21516899  | 21517407  | 21532217  | 21532421  |
| 218 NA18972 | [2515685 chr5 | 5 | 26831997  | 26837938  | 5942   | 6   | 0.822392  | 0.069441 | 26829858  | 26834136  | 26837469  | 26838401  |
| 219 NA18972 | [2515685 chr5 | 5 | 34214373  | 34229543  | 15171  | 39  | -0.403119 | 0.026267 | 34214196  | 34214550  | 34229296  | 34229791  |
| 220 NA18972 | [2515685 chr5 | 5 | 55099477  | 55114669  | 15193  | 4   | 0.431396  | 0.082422 | 55099288  | 55099667  | 55111946  | 55117397  |
| 221 NA18972 | [2515685 chr5 | 5 | 68885666  | 68939318  | 53653  | 87  | 0.356348  | 0.017661 | 68885378  | 68885955  | 68939084  | 68939557  |
| 222 NA18972 | [2515685 chr5 | 5 | 68961866  | 68986119  | 24254  | 64  | -0.331571 | 0.020505 | 68960721  | 68963012  | 68985949  | 68986281  |
| 223 NA18972 | [2515685 chr5 | 5 | 69230421  | 69247097  | 16677  | 43  | -0.403464 | 0.025016 | 69230274  | 69230569  | 69246993  | 69247207  |
| 224 NA18972 | [2515685 chr5 | 5 | 69357598  | 69415247  | 57650  | 52  | 0.506347  | 0.023045 | 69357245  | 69357951  | 69412002  | 69419467  |
| 225 NA18972 | [2515685 chr5 | 5 | 69534189  | 69565860  | 31672  | 82  | -0.381546 | 0.018115 | 69534085  | 69534294  | 69565690  | 69566031  |
| 226 NA18972 | [2515685 chr5 | 5 | 69612695  | 69807546  | 194852 | 381 | 0.267702  | 0.008427 | 69612648  | 69612743  | 69807235  | 69807851  |
| 227 NA18972 | [2515685 chr5 | 5 | 69817505  | 69862137  | 44633  | 114 | -0.332666 | 0.015363 | 69816360  | 69818651  | 69862066  | 69862201  |
| 228 NA18972 | [2515685 chr5 | 5 | 70106303  | 70122148  | 15846  | 41  | -0.412475 | 0.025619 | 70106156  | 70106451  | 70122044  | 70122257  |
| 229 NA18972 | [2515685 chr5 | 5 | 70197495  | 70405126  | 207632 | 263 | 0.333194  | 0.010162 | 70197038  | 70197953  | 70404569  | 70405687  |
| 230 NA18972 | [2515685 chr5 | 5 | 70497604  | 70511908  | 14305  | 31  | 0.288332  | 0.029462 | 70497172  | 70498037  | 70511607  | 70512211  |
| 231 NA18972 | [2515685 chr5 | 5 | 70534574  | 70547927  | 13354  | 34  | -0.381302 | 0.01834  | 70534470  | 70534679  | 70547851  | 70548007  |
| 232 NA18972 | [2515685 chr5 | 5 | 70552603  | 70566095  | 13493  | 35  | -0.381302 | 0.01834  | 70552499  | 70552708  | 70566025  | 70566161  |
| 233 NA18972 | [2515685 chr5 | 5 | 81459160  | 81466108  | 6949   | 2   | -1.521317 | 0.125168 | 81455614  | 81462405  | 81462863  | 81470281  |
| 234 NA18972 | [2515685 chr5 | 5 | 93928460  | 93933101  | 4642   | 4   | -0.42038  | 0.082019 | 93927706  | 93929215  | 93931984  | 93934211  |
| 235 NA18972 | [2515685 chr5 | 5 | 97427204  | 97428353  | 11150  | 2   | 0.896472  | 0.116381 | 97426913  | 97427496  | 97428177  | 97428521  |
| 236 NA18972 | [2515685 chr5 | 5 | 98885698  | 98900161  | 14464  | 30  | -0.342335 | 0.030139 | 98885401  | 98885995  | 98900052  | 98900271  |
| 237 NA18972 | [2515685 chr5 | 5 | 99408801  | 99419037  | 10237  | 14  | -0.371663 | 0.026287 | 99408605  | 99408997  | 99418328  | 99419741  |
| 238 NA18972 | [2515685 chr5 | 5 | 99424905  | 99436061  | 11157  | 18  | -0.371663 | 0.026287 | 99424257  | 99425553  | 99433487  | 99438631  |
| 239 NA18972 | [2515685 chr5 | 5 | 99738581  | 99756339  | 17759  | 37  | -0.384334 | 0.026968 | 99738184  | 99738978  | 99756204  | 99756477  |
| 240 NA18972 | [2515685 chr5 | 5 | 137835178 | 137844134 | 8957   | 7   | 0.677277  | 0.064652 | 137834745 | 137835611 | 137843310 | 137844957 |
| 241 NA18972 | [2515685 chr5 | 5 | 140194263 | 140197431 | 3169   | 5   | 0.444266  | 0.07336  | 140193978 | 140194548 | 140197059 | 140197807 |
| 242 NA18972 | [2515685 chr5 | 5 | 140203081 | 140218928 | 15848  | 18  | 2.777291  | 0.063528 | 140202344 | 140203819 | 140218508 | 140219347 |
| 243 NA18972 | [2515685 chr5 | 5 | 140243009 | 140254228 | 11220  | 9   | 0.286409  | 0.054679 | 140242543 | 140243476 | 140253688 | 140254767 |
| 244 NA18972 | [2515685 chr5 | 5 | 175476954 | 175483482 | 6529   | 10  | 0.266518  | 0.051873 | 175476662 | 175477247 | 175483251 | 175483717 |
| 245 NA18972 | [2515685 chr5 | 5 | 180803541 | 180809238 | 5698   | 9   | -0.28742  | 0.054679 | 180803022 | 180804061 | 180806709 | 180811767 |
| 246 NA18972 | [2515685 chr5 | 5 | 180821687 | 180828912 | 7226   | 10  | 0.30921   | 0.051873 | 180820892 | 180822483 | 180827734 | 180830097 |
| 247 NA18972 | [2515685 chr6 | 6 | 121496    | 124826    | 3331   | 2   | -0.641381 | 0.115992 | 121016    | 121977    | 123194    | 126455    |
| 248 NA18972 | [2515685 chr6 | 6 | 201823    | 328723    | 126901 | 129 | 0.487756  | 0.014489 | 201415    | 202232    | 328320    | 329127    |
| 249 NA18972 | [2515685 chr6 | 6 | 19149239  | 19156670  | 7432   | 10  | -0.8892   | 0.053112 | 19148813  | 19149665  | 19153876  | 19159461  |
| 250 NA18972 | [2515685 chr6 | 6 | 26827749  | 26890332  | 62584  | 148 | -0.335187 | 0.013496 | 26827510  | 26827989  | 26890093  | 26890577  |
| 251 NA18972 | [2515685 chr6 | 6 | 26960263  | 26976094  | 15832  | 34  | -0.389763 | 0.028132 | 26959735  | 26960792  | 26975842  | 26976347  |
| 252 NA18972 | [2515685 chr6 | 6 | 29958572  | 30010672  | 52101  | 49  | -1.038912 | 0.027477 | 29957670  | 29959474  | 30010262  | 300111087 |
| 253 NA18972 | [2515685 chr6 | 6 | 31383567  | 31386100  | 2534   | 3   | -0.912242 | 0.098154 | 31383185  | 31383949  | 31385806  | 31386391  |
| 254 NA18972 | [2515685 chr6 | 6 | 32277858  | 32294017  | 16160  | 14  | -0.266781 | 0.043842 | 32277318  | 32278398  | 32293561  | 32294477  |
| 255 NA18972 | [2515685 chr6 | 6 | 32468899  | 32477058  | 8160   | 7   | -0.444306 | 0.062206 | 32467750  | 32470049  | 32476327  | 32477791  |
| 256 NA18972 | [2515685 chr6 | 6 | 32557126  | 32603035  | 45910  | 37  | 0.655872  | 0.013567 | 32556948  | 32557305  | 32601735  | 32604331  |
| 257 NA18972 | [2515685 chr6 | 6 | 32612720  | 32744343  | 131624 | 129 | 0.655872  | 0.013567 | 32611897  | 32613543  | 32744136  | 32744551  |

|             |               |   |           |           |        |     |           |          |           |           |           |           |
|-------------|---------------|---|-----------|-----------|--------|-----|-----------|----------|-----------|-----------|-----------|-----------|
| 258 NA18972 | [2515685 chr6 | 6 | 32761396  | 32763261  | 1866   | 4   | 0.647053  | 0.085173 | 32761019  | 32761774  | 32763101  | 32763427  |
| 259 NA18972 | [2515685 chr6 | 6 | 32775535  | 32793066  | 17532  | 12  | 0.323284  | 0.04963  | 32775260  | 32775810  | 32792384  | 32793749  |
| 260 NA18972 | [2515685 chr6 | 6 | 54036900  | 54042384  | 5485   | 5   | 4.556077  | 0.159665 | 54036573  | 54037227  | 54041771  | 54042999  |
| 261 NA18972 | [2515685 chr6 | 6 | 58248183  | 58258610  | 10428  | 16  | -0.2927   | 0.041584 | 58247693  | 58248673  | 58258363  | 58258859  |
| 262 NA18972 | [2515685 chr6 | 6 | 58359812  | 58373562  | 13751  | 27  | -0.403516 | 0.03157  | 58359287  | 58360338  | 58373372  | 58373759  |
| 263 NA18972 | [2515685 chr6 | 6 | 66455162  | 66461833  | 6672   | 5   | -0.889772 | 0.078889 | 66454046  | 66456278  | 66461410  | 66462259  |
| 264 NA18972 | [2515685 chr6 | 6 | 77495034  | 77513547  | 18514  | 12  | 0.867728  | 0.050414 | 77493568  | 77496500  | 77510011  | 77517699  |
| 265 NA18972 | [2515685 chr6 | 6 | 78326767  | 78328478  | 1712   | 2   | -0.653467 | 0.115992 | 78325974  | 78327560  | 78328067  | 78328889  |
| 266 NA18972 | [2515685 chr6 | 6 | 79023318  | 79093263  | 69946  | 70  | 0.864758  | 0.020312 | 79022028  | 79024609  | 79091909  | 79094619  |
| 267 NA18972 | [2515685 chr6 | 6 | 81341888  | 81350271  | 8384   | 10  | -0.958777 | 0.053352 | 81341647  | 81342129  | 81350013  | 81350539  |
| 268 NA18972 | [2515685 chr6 | 6 | 82206376  | 82229099  | 22724  | 27  | -0.846045 | 0.032136 | 82193230  | 82209912  | 82226512  | 82231689  |
| 269 NA18972 | [2515685 chr6 | 6 | 88460591  | 88469674  | 9084   | 12  | 0.289508  | 0.047708 | 88460274  | 88460909  | 88469034  | 88470319  |
| 270 NA18972 | [2515685 chr6 | 6 | 103844685 | 103871201 | 26517  | 16  | 2.513102  | 0.069269 | 103844347 | 103845023 | 103868241 | 103874169 |
| 271 NA18972 | [2515685 chr6 | 6 | 154242420 | 154243597 | 1178   | 2   | 0.675962  | 0.115993 | 154242101 | 154242740 | 154243254 | 15424394  |
| 272 NA18972 | [2515685 chr6 | 6 | 160056728 | 160058998 | 2271   | 2   | -0.968599 | 0.115992 | 160055808 | 160057648 | 160058322 | 160059679 |
| 273 NA18972 | [2515685 chr6 | 6 | 161001907 | 161038145 | 36239  | 49  | 0.640508  | 0.023514 | 161001167 | 161002648 | 161037686 | 161038609 |
| 274 NA18972 | [2515685 chr6 | 6 | 167523410 | 167528147 | 4738   | 5   | 0.43711   | 0.07336  | 167523126 | 167523695 | 167527575 | 167528719 |
| 275 NA18972 | [2515685 chr6 | 6 | 167630125 | 167632041 | 1917   | 2   | 0.636439  | 0.12444  | 167629818 | 167630433 | 167631524 | 167632559 |
| 276 NA18972 | [2515685 chr6 | 6 | 167775161 | 167777997 | 2837   | 2   | 1.477688  | 0.125414 | 167774259 | 167776063 | 167777289 | 167778709 |
| 277 NA18972 | [2515685 chr6 | 6 | 170603879 | 170604666 | 788    | 2   | -0.756348 | 0.115992 | 170603541 | 170604217 | 170604339 | 170604999 |
| 278 NA18972 | [2515685 chr6 | 6 | 170684555 | 170686252 | 1698   | 4   | -0.881194 | 0.082346 | 170684170 | 170684940 | 170686034 | 170686479 |
| 279 NA18972 | [2515685 chr6 | 6 | 170692529 | 170695455 | 2927   | 14  | 0.260402  | 0.043841 | 170692183 | 170692876 | 170695068 | 170695849 |
| 280 NA18972 | [2515685 chr6 | 6 | 170721483 | 170723478 | 1996   | 10  | -0.648899 | 0.051873 | 170721218 | 170721749 | 170723334 | 170723629 |
| 281 NA18972 | [2515685 chr7 | 7 | 188812    | 192178    | 3367   | 2   | -0.650141 | 0.115993 | 188430    | 189194    | 189783    | 197026    |
| 282 NA18972 | [2515685 chr7 | 7 | 1084125   | 1086660   | 2536   | 15  | 0.344177  | 0.042354 | 1083752   | 1084499   | 1085871   | 1087449   |
| 283 NA18972 | [2515685 chr7 | 7 | 3384111   | 3392502   | 8392   | 7   | 0.87836   | 0.063197 | 3383451   | 3384772   | 3390107   | 3395619   |
| 284 NA18972 | [2515685 chr7 | 7 | 6521558   | 6536096   | 14539  | 15  | 0.309438  | 0.042354 | 6521351   | 6521765   | 6535612   | 6536589   |
| 285 NA18972 | [2515685 chr7 | 7 | 7448340   | 7635641   | 187302 | 4   | 0.415906  | 0.082982 | 7362435   | 7450735   | 7635240   | 7636042   |
| 286 NA18972 | [2515685 chr7 | 7 | 14024131  | 14025556  | 1426   | 5   | 0.550297  | 0.073359 | 14023511  | 14024751  | 14025262  | 14025859  |
| 287 NA18972 | [2515685 chr7 | 7 | 14069609  | 14072254  | 2646   | 3   | 0.51986   | 0.097385 | 14069062  | 14070157  | 14071722  | 14072789  |
| 288 NA18972 | [2515685 chr7 | 7 | 15002967  | 15009839  | 6873   | 3   | -0.484811 | 0.094707 | 15002468  | 15003467  | 15009610  | 15010069  |
| 289 NA18972 | [2515685 chr7 | 7 | 16865689  | 16870303  | 4615   | 3   | -0.845252 | 0.095881 | 16863263  | 16868084  | 16869575  | 16871039  |
| 290 NA18972 | [2515685 chr7 | 7 | 38159778  | 38177664  | 17887  | 19  | -0.335875 | 0.037673 | 38159476  | 38160081  | 38177341  | 38177989  |
| 291 NA18972 | [2515685 chr7 | 7 | 43774540  | 43856045  | 81506  | 97  | 0.613584  | 0.016732 | 43774344  | 43774737  | 43853730  | 43858369  |
| 292 NA18972 | [2515685 chr7 | 7 | 57512425  | 57524163  | 11739  | 13  | -0.269547 | 0.045496 | 57512005  | 57512846  | 57523428  | 57524899  |
| 293 NA18972 | [2515685 chr7 | 7 | 62253787  | 62255088  | 1302   | 8   | -0.369034 | 0.057996 | 62253736  | 62253838  | 62254924  | 62255259  |
| 294 NA18972 | [2515685 chr7 | 7 | 62302079  | 62303379  | 1301   | 8   | -0.369042 | 0.057997 | 62301915  | 62302243  | 62303330  | 62303429  |
| 295 NA18972 | [2515685 chr7 | 7 | 66185764  | 66206287  | 20524  | 33  | 0.369557  | 0.028556 | 66185376  | 66186152  | 66205860  | 66206719  |
| 296 NA18972 | [2515685 chr7 | 7 | 69868331  | 69869623  | 1293   | 2   | 0.892147  | 0.123146 | 69867990  | 69868672  | 69869269  | 69869979  |
| 297 NA18972 | [2515685 chr7 | 7 | 69869623  | 69871056  | 1434   | 2   | 3.338823  | 0.188745 | 69869269  | 69869978  | 69870420  | 69871699  |
| 298 NA18972 | [2515685 chr7 | 7 | 71775031  | 71788401  | 13371  | 25  | 0.406144  | 0.032808 | 71773381  | 71776681  | 71787589  | 71789219  |
| 299 NA18972 | [2515685 chr7 | 7 | 73698894  | 73700080  | 1187   | 3   | 0.541186  | 0.09503  | 73698686  | 73699103  | 73699523  | 73700639  |
| 300 NA18972 | [2515685 chr7 | 7 | 73754718  | 73779576  | 24859  | 48  | 0.253892  | 0.023677 | 73754647  | 73754790  | 73778909  | 73780249  |
| 301 NA18972 | [2515685 chr7 | 7 | 73965656  | 73966691  | 1036   | 4   | 0.510542  | 0.082229 | 73965279  | 73966033  | 73966513  | 73966879  |
| 302 NA18972 | [2515685 chr7 | 7 | 74138782  | 74159460  | 20679  | 44  | 0.270612  | 0.024729 | 74137741  | 74139824  | 74159389  | 74159539  |
| 303 NA18972 | [2515685 chr7 | 7 | 74559882  | 74564239  | 4358   | 10  | 0.443203  | 0.051873 | 74559528  | 74560236  | 74563255  | 74565229  |
| 304 NA18972 | [2515685 chr7 | 7 | 74587905  | 74592261  | 4357   | 10  | 0.443203  | 0.051874 | 74587551  | 74588259  | 74591278  | 74593249  |
| 305 NA18972 | [2515685 chr7 | 7 | 74615924  | 74620281  | 4358   | 10  | 0.443203  | 0.051873 | 74615570  | 74616278  | 74619297  | 74621269  |
| 306 NA18972 | [2515685 chr7 | 7 | 74766333  | 74781906  | 15574  | 30  | 0.439493  | 0.029949 | 74766323  | 74766343  | 74781415  | 74782399  |
| 307 NA18972 | [2515685 chr7 | 7 | 75802193  | 75817178  | 14986  | 30  | 0.432198  | 0.029949 | 75801169  | 75803217  | 75817169  | 75817189  |
| 308 NA18972 | [2515685 chr7 | 7 | 76288047  | 76347035  | 58989  | 100 | 0.283529  | 0.016404 | 76287920  | 76288175  | 76346697  | 76347379  |
| 309 NA18972 | [2515685 chr7 | 7 | 86392789  | 86394206  | 1418   | 2   | 0.80397   | 0.117528 | 86392392  | 86393187  | 86393827  | 86394589  |
| 310 NA18972 | [2515685 chr7 | 7 | 89455106  | 89456632  | 1527   | 3   | 3.45446   | 0.156233 | 89454839  | 89455373  | 89456225  | 89457039  |
| 311 NA18972 | [2515685 chr7 | 7 | 89481337  | 89483585  | 2249   | 3   | 0.533514  | 0.100904 | 89481019  | 89481656  | 89483222  | 89483999  |
| 312 NA18972 | [2515685 chr7 | 7 | 90854163  | 90858514  | 4352   | 4   | 0.413263  | 0.082506 | 90853717  | 90854609  | 90856119  | 90863379  |

|             |               |   |           |           |         |      |           |          |           |           |           |           |
|-------------|---------------|---|-----------|-----------|---------|------|-----------|----------|-----------|-----------|-----------|-----------|
| 313 NA18972 | [2515685 chr7 | 7 | 92971481  | 92976895  | 5415    | 4    | 0.753717  | 0.086745 | 92971060  | 92971903  | 92975569  | 92978227  |
| 314 NA18972 | [2515685 chr7 | 7 | 97201390  | 97203354  | 1965    | 7    | -0.478296 | 0.062001 | 97201229  | 97201551  | 97203295  | 97203411  |
| 315 NA18972 | [2515685 chr7 | 7 | 99542714  | 99580870  | 38157   | 37   | 0.270922  | 0.026967 | 99541225  | 99544203  | 99580449  | 99581291  |
| 316 NA18972 | [2515685 chr7 | 7 | 100202927 | 100203955 | 1029    | 2    | -0.653158 | 0.115992 | 100202569 | 100203285 | 100203714 | 10020419  |
| 317 NA18972 | [2515685 chr7 | 7 | 101576590 | 101591961 | 15372   | 28   | 0.422735  | 0.031    | 101575497 | 101577683 | 101591559 | 10159236  |
| 318 NA18972 | [2515685 chr7 | 7 | 101706840 | 101925433 | 218594  | 266  | 0.672495  | 0.010111 | 101690888 | 101709235 | 101924670 | 10192619  |
| 319 NA18972 | [2515685 chr7 | 7 | 109015758 | 109016886 | 1129    | 2    | -0.687444 | 0.124001 | 109015556 | 109015960 | 109016341 | 10901743  |
| 320 NA18972 | [2515685 chr7 | 7 | 109034739 | 109046722 | 11984   | 9    | 2.636468  | 0.09128  | 109024063 | 109037134 | 109046491 | 10904695  |
| 321 NA18972 | [2515685 chr7 | 7 | 109776378 | 109782655 | 6278    | 5    | 0.846055  | 0.075582 | 109775821 | 109776936 | 109782301 | 109783011 |
| 322 NA18972 | [2515685 chr7 | 7 | 125639507 | 125644775 | 5269    | 6    | -3.390978 | 0.137058 | 125639054 | 125639961 | 125644046 | 12564550  |
| 323 NA18972 | [2515685 chr7 | 7 | 133243981 | 133257404 | 13424   | 14   | 3.359225  | 0.08127  | 133243755 | 133244207 | 133255009 | 13326093  |
| 324 NA18972 | [2515685 chr7 | 7 | 141239940 | 141244766 | 4827    | 6    | 0.390767  | 0.068842 | 141239521 | 141240359 | 141244286 | 14124524  |
| 325 NA18972 | [2515685 chr7 | 7 | 141759291 | 141761893 | 2603    | 3    | -0.781479 | 0.094709 | 141758892 | 141759690 | 141761589 | 14176219  |
| 326 NA18972 | [2515685 chr7 | 7 | 141963858 | 141991871 | 28014   | 33   | -0.459349 | 0.028601 | 141963394 | 141964323 | 141991092 | 14199265  |
| 327 NA18972 | [2515685 chr7 | 7 | 143320629 | 143509575 | 188947  | 359  | -0.271168 | 0.00866  | 143320373 | 143320886 | 143509454 | 14350969  |
| 328 NA18972 | [2515685 chr7 | 7 | 158207288 | 158209880 | 2593    | 2    | 1.229316  | 0.123391 | 158206344 | 158208233 | 158209333 | 15821042  |
| 329 NA18972 | [2515685 chr7 | 7 | 158617060 | 158624423 | 7364    | 6    | 0.983793  | 0.071735 | 158616763 | 158617357 | 158622028 | 15862681  |
| 330 NA18972 | [2515685 chr8 | 8 | 1328256   | 1343509   | 15254   | 45   | -0.727322 | 0.02472  | 1327688   | 1328824   | 1342795   | 1344224   |
| 331 NA18972 | [2515685 chr8 | 8 | 1396135   | 1398803   | 2669    | 4    | -0.60705  | 0.082019 | 1395585   | 1396686   | 1398426   | 1399187   |
| 332 NA18972 | [2515685 chr8 | 8 | 2238705   | 2253822   | 15118   | 10   | 0.795074  | 0.052194 | 2233839   | 2241488   | 2251039   | 2257521   |
| 333 NA18972 | [2515685 chr8 | 8 | 3673707   | 5933423   | 2259717 | 2202 | 0.477683  | 0.003516 | 3673110   | 3674304   | 5930640   | 5938871   |
| 334 NA18972 | [2515685 chr8 | 8 | 6813967   | 6815529   | 1563    | 2    | -5.030777 | 0.251579 | 6813560   | 6814375   | 6815199   | 6815861   |
| 335 NA18972 | [2515685 chr8 | 8 | 6838442   | 6839964   | 1523    | 2    | -0.620591 | 0.115992 | 6837912   | 6838972   | 6839687   | 6840241   |
| 336 NA18972 | [2515685 chr8 | 8 | 6857545   | 6859067   | 1523    | 2    | -0.620593 | 0.115993 | 6857015   | 6858075   | 6858790   | 6859341   |
| 337 NA18972 | [2515685 chr8 | 8 | 6863578   | 6866494   | 2917    | 6    | -0.417221 | 0.066968 | 6863028   | 6864129   | 6866269   | 6866711   |
| 338 NA18972 | [2515685 chr8 | 8 | 7061162   | 7075965   | 14804   | 24   | -0.397424 | 0.033484 | 7060897   | 7061427   | 7075687   | 7076244   |
| 339 NA18972 | [2515685 chr8 | 8 | 7097781   | 7146048   | 48268   | 203  | -0.919504 | 0.004101 | 7097278   | 7098285   | 7145836   | 7146267   |
| 340 NA18972 | [2515685 chr8 | 8 | 7221762   | 7828144   | 606383  | 1056 | -0.919504 | 0.004101 | 7221604   | 7221921   | 7827558   | 7828731   |
| 341 NA18972 | [2515685 chr8 | 8 | 7903980   | 7929654   | 25675   | 97   | -0.919504 | 0.004101 | 7903568   | 7904392   | 7929154   | 7930151   |
| 342 NA18972 | [2515685 chr8 | 8 | 7950916   | 7966244   | 15329   | 39   | -0.404287 | 0.026267 | 7950711   | 7951122   | 7965980   | 7966501   |
| 343 NA18972 | [2515685 chr8 | 8 | 11903424  | 11912906  | 9483    | 19   | -0.301401 | 0.037633 | 11902919  | 11903929  | 11912660  | 11913151  |
| 344 NA18972 | [2515685 chr8 | 8 | 12023134  | 12034819  | 11686   | 31   | 0.930171  | 0.030234 | 12022997  | 12023272  | 12034665  | 12034971  |
| 345 NA18972 | [2515685 chr8 | 8 | 12034819  | 12046210  | 11392   | 16   | -0.378804 | 0.023198 | 12034665  | 12034973  | 12046041  | 12046371  |
| 346 NA18972 | [2515685 chr8 | 8 | 12050247  | 12064826  | 14580   | 28   | -0.378804 | 0.023198 | 12049802  | 12050693  | 12064663  | 12064981  |
| 347 NA18972 | [2515685 chr8 | 8 | 12064826  | 12072888  | 8063    | 27   | -1.423778 | 0.032662 | 12064663  | 12064989  | 12072625  | 12073151  |
| 348 NA18972 | [2515685 chr8 | 8 | 12276602  | 12283346  | 6745    | 11   | 0.854343  | 0.050619 | 12276206  | 12276998  | 12283070  | 12283621  |
| 349 NA18972 | [2515685 chr8 | 8 | 12299537  | 12312498  | 12962   | 21   | -0.389977 | 0.035796 | 12299086  | 12299988  | 12312373  | 12312621  |
| 350 NA18972 | [2515685 chr8 | 8 | 12314107  | 12322179  | 8073    | 24   | -1.375572 | 0.034362 | 12313944  | 12314270  | 1231906   | 12322451  |
| 351 NA18972 | [2515685 chr8 | 8 | 12478793  | 12505186  | 26394   | 47   | -0.305478 | 0.023927 | 12478144  | 12479443  | 12504624  | 12505741  |
| 352 NA18972 | [2515685 chr8 | 8 | 12505186  | 12505761  | 576     | 2    | -1.192239 | 0.121565 | 12504624  | 12505748  | 12505749  | 12505771  |
| 353 NA18972 | [2515685 chr8 | 8 | 12505761  | 12511340  | 5580    | 15   | -0.394867 | 0.042354 | 12505749  | 12505774  | 12510798  | 12511881  |
| 354 NA18972 | [2515685 chr8 | 8 | 14909712  | 14911191  | 1480    | 2    | -0.826815 | 0.115992 | 14909295  | 14910130  | 14910752  | 14911631  |
| 355 NA18972 | [2515685 chr8 | 8 | 18900549  | 18901909  | 1361    | 2    | -0.870349 | 0.117593 | 18900138  | 18900960  | 18901577  | 18902241  |
| 356 NA18972 | [2515685 chr8 | 8 | 20021407  | 20024771  | 3365    | 2    | -0.792067 | 0.118643 | 20019323  | 20023491  | 20024338  | 20025201  |
| 357 NA18972 | [2515685 chr8 | 8 | 39351178  | 39506673  | 155496  | 161  | 0.860007  | 0.013416 | 39350826  | 39351530  | 39505284  | 39508061  |
| 358 NA18972 | [2515685 chr8 | 8 | 48977115  | 48979685  | 2571    | 4    | 0.41935   | 0.082019 | 48976779  | 48977451  | 48979273  | 48980091  |
| 359 NA18972 | [2515685 chr8 | 8 | 49081430  | 49084499  | 3070    | 2    | -0.973792 | 0.119901 | 49079497  | 49083364  | 49084089  | 49084911  |
| 360 NA18972 | [2515685 chr8 | 8 | 51969408  | 51971838  | 2431    | 5    | -0.417552 | 0.073852 | 51969071  | 51969745  | 51971671  | 51972001  |
| 361 NA18972 | [2515685 chr8 | 8 | 54001807  | 54002677  | 871     | 2    | -0.978957 | 0.122332 | 54001673  | 54001942  | 54002470  | 54002881  |
| 362 NA18972 | [2515685 chr8 | 8 | 54013599  | 54016907  | 3309    | 6    | -0.346756 | 0.066968 | 54013425  | 54013773  | 54016753  | 54017061  |
| 363 NA18972 | [2515685 chr8 | 8 | 58280040  | 58281383  | 1344    | 2    | 1.319307  | 0.125046 | 58279595  | 58280486  | 58280865  | 58281901  |
| 364 NA18972 | [2515685 chr8 | 8 | 85423649  | 85431920  | 8272    | 7    | 0.97066   | 0.062949 | 85423043  | 85424256  | 85431347  | 85432491  |
| 365 NA18972 | [2515685 chr8 | 8 | 86726563  | 86910255  | 183693  | 122  | 0.525705  | 0.014855 | 86726002  | 86727125  | 86910002  | 86910501  |
| 366 NA18972 | [2515685 chr8 | 8 | 91084001  | 91088518  | 4518    | 6    | 0.360895  | 0.067122 | 91083536  | 91084467  | 91088260  | 91088771  |
| 367 NA18972 | [2515685 chr8 | 8 | 115702151 | 115712413 | 10263   | 11   | -0.854463 | 0.051202 | 115701237 | 115703065 | 115712263 | 11571256  |

|             |                |    |           |           |        |      |           |          |           |           |           |          |
|-------------|----------------|----|-----------|-----------|--------|------|-----------|----------|-----------|-----------|-----------|----------|
| 368 NA18972 | [2515685 chr8  | 8  | 120222631 | 120228243 | 5613   | 4    | 1.09983   | 0.087112 | 120218251 | 120225414 | 120227679 | 12022880 |
| 369 NA18972 | [2515685 chr9  | 9  | 310045    | 312573    | 2529   | 61   | -0.423375 | 0.021003 | 309952    | 310139    | 312407    | 312740   |
| 370 NA18972 | [2515685 chr9  | 9  | 5369359   | 5374645   | 5287   | 3    | 0.501856  | 0.099533 | 5369173   | 5369546   | 5374439   | 5374852  |
| 371 NA18972 | [2515685 chr9  | 9  | 12673287  | 12676879  | 3593   | 3    | 0.498301  | 0.094707 | 12671187  | 12675387  | 12676588  | 1267717  |
| 372 NA18972 | [2515685 chr9  | 9  | 33005458  | 33018577  | 13120  | 14   | 0.255655  | 0.043842 | 33005136  | 33005780  | 33018086  | 33019065 |
| 373 NA18972 | [2515685 chr9  | 9  | 38534534  | 38554763  | 20230  | 10   | -0.372996 | 0.051873 | 38534046  | 38535023  | 38552448  | 38557071 |
| 374 NA18972 | [2515685 chr9  | 9  | 38855995  | 38864826  | 8832   | 17   | -0.269333 | 0.040326 | 38849975  | 38858379  | 38864539  | 38865111 |
| 375 NA18972 | [2515685 chr9  | 9  | 39273300  | 39277832  | 4533   | 16   | -0.317655 | 0.041013 | 39273050  | 39273550  | 39277671  | 39277992 |
| 376 NA18972 | [2515685 chr9  | 9  | 39587311  | 39588551  | 1241   | 6    | -0.424198 | 0.066984 | 39587155  | 39587467  | 39588377  | 39588721 |
| 377 NA18972 | [2515685 chr9  | 9  | 39814186  | 39815652  | 1467   | 2    | -0.682859 | 0.115993 | 39814035  | 39814337  | 39814733  | 39816572 |
| 378 NA18972 | [2515685 chr9  | 9  | 39898076  | 40011174  | 113099 | 119  | 0.308816  | 0.015039 | 39897666  | 39898487  | 40011032  | 40011311 |
| 379 NA18972 | [2515685 chr9  | 9  | 40491521  | 40561572  | 70052  | 140  | 0.317747  | 0.013886 | 40491324  | 40491719  | 40561162  | 40561982 |
| 380 NA18972 | [2515685 chr9  | 9  | 40609092  | 40611368  | 2277   | 7    | -0.410083 | 0.062001 | 40608659  | 40609526  | 40611239  | 40611491 |
| 381 NA18972 | [2515685 chr9  | 9  | 41125241  | 41125745  | 505    | 2    | 0.646911  | 0.115992 | 41125099  | 41125384  | 41125737  | 41125752 |
| 382 NA18972 | [2515685 chr9  | 9  | 41505659  | 41568017  | 62359  | 124  | 0.289451  | 0.01475  | 41505565  | 41505754  | 41567867  | 41568161 |
| 383 NA18972 | [2515685 chr9  | 9  | 41903948  | 41906282  | 2335   | 6    | -0.437784 | 0.066968 | 41903800  | 41904097  | 41906056  | 41906501 |
| 384 NA18972 | [2515685 chr9  | 9  | 42153689  | 42216052  | 62364  | 128  | 0.284472  | 0.014517 | 42153539  | 42153840  | 42215957  | 42216142 |
| 385 NA18972 | [2515685 chr9  | 9  | 42283396  | 42304221  | 20826  | 37   | -0.251922 | 0.026968 | 42282425  | 42284368  | 42303995  | 42304441 |
| 386 NA18972 | [2515685 chr9  | 9  | 42645007  | 42646038  | 1032   | 2    | -0.83033  | 0.115993 | 42644851  | 42645163  | 42645769  | 42646302 |
| 387 NA18972 | [2515685 chr9  | 9  | 42669198  | 42670938  | 1741   | 2    | -0.719674 | 0.115992 | 42668921  | 42669475  | 42670652  | 42671222 |
| 388 NA18972 | [2515685 chr9  | 9  | 42754727  | 42756705  | 1979   | 3    | -0.767566 | 0.094707 | 42754385  | 42755070  | 42755767  | 42757624 |
| 389 NA18972 | [2515685 chr9  | 9  | 42789875  | 42791615  | 1741   | 2    | -0.719674 | 0.115992 | 42789598  | 42790152  | 42791329  | 42791902 |
| 390 NA18972 | [2515685 chr9  | 9  | 42875403  | 42877381  | 1979   | 3    | -0.767566 | 0.094707 | 42875061  | 42875746  | 42876443  | 42878321 |
| 391 NA18972 | [2515685 chr9  | 9  | 43059964  | 43066832  | 6869   | 15   | -0.494563 | 0.042605 | 43059908  | 43060020  | 43066646  | 43067011 |
| 392 NA18972 | [2515685 chr9  | 9  | 43441908  | 43447734  | 5827   | 19   | -0.259931 | 0.037633 | 43441841  | 43441976  | 43446759  | 43448701 |
| 393 NA18972 | [2515685 chr9  | 9  | 43502327  | 43506355  | 4029   | 15   | -0.30431  | 0.042354 | 43501352  | 43503302  | 43506327  | 43506382 |
| 394 NA18972 | [2515685 chr9  | 9  | 43520825  | 43523159  | 2335   | 7    | -0.431803 | 0.062001 | 43520677  | 43520974  | 43522933  | 43523381 |
| 395 NA18972 | [2515685 chr9  | 9  | 43714906  | 43721070  | 6165   | 12   | -0.573382 | 0.047899 | 43714582  | 43715231  | 43720801  | 43721331 |
| 396 NA18972 | [2515685 chr9  | 9  | 43742208  | 43749082  | 6875   | 13   | -0.392237 | 0.045496 | 43741882  | 43742535  | 43748824  | 43749342 |
| 397 NA18972 | [2515685 chr9  | 9  | 43937179  | 43939315  | 2137   | 7    | -0.357344 | 0.062001 | 43936836  | 43937522  | 43938831  | 43939801 |
| 398 NA18972 | [2515685 chr9  | 9  | 44389967  | 44403202  | 13236  | 8    | 0.396266  | 0.057996 | 44389400  | 44390534  | 44402892  | 44403512 |
| 399 NA18972 | [2515685 chr9  | 9  | 45441271  | 45456401  | 15131  | 13   | 0.252148  | 0.045496 | 45440324  | 45442218  | 45455127  | 45457671 |
| 400 NA18972 | [2515685 chr9  | 9  | 65937679  | 65938183  | 505    | 2    | 0.646914  | 0.115993 | 65937537  | 65937822  | 65938175  | 65938192 |
| 401 NA18972 | [2515685 chr9  | 9  | 66047053  | 66052737  | 5685   | 12   | -0.314953 | 0.047354 | 66046766  | 66047340  | 66052707  | 66052762 |
| 402 NA18972 | [2515685 chr9  | 9  | 67373952  | 67378839  | 4888   | 5    | -0.461286 | 0.073361 | 67367248  | 67376336  | 67378627  | 67379052 |
| 403 NA18972 | [2515685 chr9  | 9  | 89405187  | 89407924  | 2738   | 2    | -0.898411 | 0.11658  | 89404572  | 89405803  | 89407164  | 89408681 |
| 404 NA18972 | [2515685 chr9  | 9  | 89413068  | 89427890  | 14823  | 10   | 0.374848  | 0.052421 | 89412804  | 89413332  | 89425506  | 89433141 |
| 405 NA18972 | [2515685 chr9  | 9  | 112902065 | 112931264 | 29200  | 36   | 0.323636  | 0.02734  | 112901557 | 112902574 | 112930907 | 11293162 |
| 406 NA18972 | [2515685 chr9  | 9  | 120734655 | 120737898 | 3244   | 4    | 0.507035  | 0.082019 | 120734282 | 120735029 | 120737104 | 12073869 |
| 407 NA18972 | [2515685 chr9  | 9  | 131289414 | 131296416 | 7003   | 3    | -0.910057 | 0.094706 | 131287281 | 131291547 | 131295316 | 13129751 |
| 408 NA18972 | [2515685 chr9  | 9  | 133482481 | 133485619 | 3139   | 4    | -0.496964 | 0.082406 | 133482128 | 133482834 | 133485272 | 13348596 |
| 409 NA18972 | [2515685 chr9  | 9  | 135438397 | 135444067 | 5671   | 2    | 4.148635  | 0.206353 | 135383632 | 135440781 | 135443016 | 13544511 |
| 410 NA18972 | [2515685 chr9  | 9  | 137520450 | 137523723 | 3274   | 5    | -0.415425 | 0.07336  | 137520154 | 137520746 | 137523251 | 13752419 |
| 411 NA18972 | [2515685 chr10 | 10 | 3153885   | 3156214   | 2330   | 3    | -0.481729 | 0.094707 | 3153427   | 3154343   | 3155871   | 3156558  |
| 412 NA18972 | [2515685 chr10 | 10 | 6693908   | 6705054   | 11147  | 9    | 0.785439  | 0.055935 | 6692231   | 6695585   | 6704634   | 6705472  |
| 413 NA18972 | [2515685 chr10 | 10 | 19788068  | 19790461  | 2394   | 3    | -0.510836 | 0.094709 | 19787726  | 19788411  | 19789952  | 19790971 |
| 414 NA18972 | [2515685 chr10 | 10 | 42564252  | 42575430  | 11179  | 24   | -0.301353 | 0.033484 | 42563949  | 42564556  | 42575125  | 42575731 |
| 415 NA18972 | [2515685 chr10 | 10 | 46132047  | 46132961  | 915    | 4    | -0.66122  | 0.082019 | 46131767  | 46132327  | 46132792  | 4613313  |
| 416 NA18972 | [2515685 chr10 | 10 | 46189586  | 46232101  | 42516  | 102  | -0.315183 | 0.016283 | 46189344  | 46189829  | 46231988  | 46232212 |
| 417 NA18972 | [2515685 chr10 | 10 | 46248539  | 47173707  | 925169 | 1295 | -0.350484 | 0.004562 | 46248304  | 46248775  | 47173507  | 47173902 |
| 418 NA18972 | [2515685 chr10 | 10 | 47214619  | 47232618  | 18000  | 70   | -0.414304 | 0.019609 | 47214565  | 47214674  | 47232307  | 47232931 |
| 419 NA18972 | [2515685 chr10 | 10 | 47723208  | 47798971  | 75764  | 205  | -0.307032 | 0.011471 | 47574688  | 47725982  | 47798721  | 47799222 |
| 420 NA18972 | [2515685 chr10 | 10 | 47875692  | 47890946  | 15255  | 56   | -0.412071 | 0.021925 | 47875572  | 47875813  | 47890635  | 47891251 |
| 421 NA18972 | [2515685 chr10 | 10 | 47938225  | 47944684  | 6460   | 10   | -0.287077 | 0.051873 | 47937855  | 47938596  | 47944395  | 47944972 |
| 422 NA18972 | [2515685 chr10 | 10 | 48579313  | 48870392  | 291080 | 283  | -0.310756 | 0.009757 | 48579062  | 48579564  | 48870221  | 48870562 |

|             |                |    |           |           |        |     |           |          |           |           |           |           |
|-------------|----------------|----|-----------|-----------|--------|-----|-----------|----------|-----------|-----------|-----------|-----------|
| 423 NA18972 | [2515685 chr10 | 10 | 51157894  | 51161093  | 3200   | 5   | -0.593557 | 0.073939 | 51157629  | 51158160  | 51160825  | 5116136:  |
| 424 NA18972 | [2515685 chr10 | 10 | 52027598  | 52029824  | 2227   | 2   | 0.616885  | 0.115993 | 52026915  | 52028281  | 52029254  | 5203039!  |
| 425 NA18972 | [2515685 chr10 | 10 | 54799176  | 54808570  | 9395   | 4   | -0.465908 | 0.082019 | 54798980  | 54799372  | 54808219  | 5480892:  |
| 426 NA18972 | [2515685 chr10 | 10 | 56117212  | 56139275  | 22064  | 20  | -1.000113 | 0.037333 | 56115764  | 56118661  | 56138931  | 5613961!  |
| 427 NA18972 | [2515685 chr10 | 10 | 58568842  | 58607072  | 38231  | 29  | -3.49018  | 0.055926 | 58563614  | 58571616  | 58606922  | 5860722:  |
| 428 NA18972 | [2515685 chr10 | 10 | 66977355  | 66985193  | 7839   | 8   | -0.81666  | 0.060776 | 66976803  | 66977908  | 66984894  | 6698549:  |
| 429 NA18972 | [2515685 chr10 | 10 | 81139903  | 81162659  | 22757  | 21  | -0.260528 | 0.035796 | 81139825  | 81139981  | 81162395  | 8116292:  |
| 430 NA18972 | [2515685 chr10 | 10 | 88861693  | 88967024  | 105332 | 115 | -0.283937 | 0.015312 | 88859433  | 88863954  | 88966757  | 8896729:  |
| 431 NA18972 | [2515685 chr10 | 10 | 90930310  | 90940410  | 10101  | 9   | -0.85507  | 0.05668  | 90929856  | 90930765  | 90937636  | 9094740:  |
| 432 NA18972 | [2515685 chr10 | 10 | 124247849 | 124252558 | 47110  | 5   | -0.429748 | 0.07336  | 124247230 | 124248469 | 124252088 | 12425302: |
| 433 NA18972 | [2515685 chr10 | 10 | 124336365 | 124341749 | 5385   | 6   | 0.563426  | 0.067292 | 124335581 | 124337149 | 124341238 | 12434226: |
| 434 NA18972 | [2515685 chr10 | 10 | 124348266 | 124366738 | 18473  | 24  | -0.428929 | 0.033484 | 124348238 | 124348295 | 124366300 | 12436717: |
| 435 NA18972 | [2515685 chr10 | 10 | 127562224 | 127578663 | 16440  | 17  | -0.331395 | 0.039786 | 127561783 | 127562666 | 127578267 | 12757905: |
| 436 NA18972 | [2515685 chr10 | 10 | 134168766 | 134170259 | 1494   | 17  | -0.28499  | 0.039785 | 134168524 | 134169008 | 134170097 | 13417042: |
| 437 NA18972 | [2515685 chr10 | 10 | 135367159 | 135389814 | 22656  | 19  | -0.621132 | 0.037636 | 135366656 | 135367663 | 135387500 | 13539212: |
| 438 NA18972 | [2515685 chr11 | 11 | 2840307   | 2842410   | 2104   | 3   | -1.21433  | 0.112117 | 2839959   | 2840656   | 2841856   | 284296!   |
| 439 NA18972 | [2515685 chr11 | 11 | 4282400   | 4286328   | 3929   | 2   | 0.6682    | 0.115994 | 4282132   | 4282669   | 4283203   | 429286:   |
| 440 NA18972 | [2515685 chr11 | 11 | 5717038   | 5722070   | 5033   | 3   | 2.871565  | 0.155611 | 5716660   | 5717416   | 5718945   | 572548:   |
| 441 NA18972 | [2515685 chr11 | 11 | 5741269   | 5765993   | 24725  | 33  | 2.347768  | 0.045504 | 5741059   | 5741480   | 5765632   | 576635:   |
| 442 NA18972 | [2515685 chr11 | 11 | 5839638   | 5849480   | 9843   | 2   | 0.590844  | 0.11801  | 5839324   | 5839952   | 5849172   | 584978:   |
| 443 NA18972 | [2515685 chr11 | 11 | 11780222  | 11782174  | 1953   | 2   | -0.883888 | 0.116052 | 11779958  | 11780486  | 11781057  | 1178329:  |
| 444 NA18972 | [2515685 chr11 | 11 | 11831868  | 11833089  | 1222   | 2   | 1.136138  | 0.132459 | 11831412  | 11832324  | 11832853  | 1183332!  |
| 445 NA18972 | [2515685 chr11 | 11 | 18903408  | 18923064  | 19657  | 28  | 0.822947  | 0.032068 | 18897800  | 18906533  | 18919939  | 1892845:  |
| 446 NA18972 | [2515685 chr11 | 11 | 28965605  | 28968821  | 3217   | 4   | 4.322147  | 0.172774 | 28965284  | 28965927  | 28967972  | 2896967!  |
| 447 NA18972 | [2515685 chr11 | 11 | 34869406  | 34886184  | 16779  | 9   | 0.288773  | 0.055055 | 34868743  | 34870070  | 34885503  | 3488686!  |
| 448 NA18972 | [2515685 chr11 | 11 | 48284073  | 48284771  | 699    | 2   | 0.892934  | 0.116254 | 48283862  | 48284285  | 48284572  | 4828497!  |
| 449 NA18972 | [2515685 chr11 | 11 | 49038960  | 49051212  | 12253  | 28  | -0.273068 | 0.032106 | 49038687  | 49039234  | 49050687  | 4905173!  |
| 450 NA18972 | [2515685 chr11 | 11 | 49072856  | 49075457  | 2602   | 5   | 0.505092  | 0.07336  | 49072572  | 49073140  | 49075265  | 4907565!  |
| 451 NA18972 | [2515685 chr11 | 11 | 49665830  | 49715873  | 50044  | 36  | 0.561695  | 0.028034 | 49665251  | 49666410  | 49712748  | 4972198:  |
| 452 NA18972 | [2515685 chr11 | 11 | 55432391  | 55434453  | 2063   | 2   | -0.66849  | 0.117229 | 55431954  | 55432829  | 55433918  | 5543498:  |
| 453 NA18972 | [2515685 chr11 | 11 | 60719680  | 60766237  | 46558  | 59  | 0.530957  | 0.019395 | 60719249  | 60720112  | 60765965  | 6076651!  |
| 454 NA18972 | [2515685 chr11 | 11 | 60771505  | 60777477  | 5973   | 8   | 0.530957  | 0.019395 | 60771230  | 60771781  | 60776810  | 6077814:  |
| 455 NA18972 | [2515685 chr11 | 11 | 71217505  | 71227315  | 9811   | 13  | -0.333585 | 0.045496 | 71215645  | 71219365  | 71226862  | 7122776:  |
| 456 NA18972 | [2515685 chr11 | 11 | 73810062  | 73818580  | 8519   | 7   | -0.330745 | 0.062058 | 73809699  | 73810426  | 73818213  | 7381894:  |
| 457 NA18972 | [2515685 chr11 | 11 | 88266938  | 88303948  | 37011  | 38  | 0.331183  | 0.027087 | 88266424  | 88267453  | 88303762  | 8830413!  |
| 458 NA18972 | [2515685 chr11 | 11 | 89135297  | 89140411  | 5115   | 6   | -0.589733 | 0.0733   | 89134626  | 89135969  | 89140087  | 8914073!  |
| 459 NA18972 | [2515685 chr11 | 11 | 89142582  | 89146818  | 4237   | 8   | -0.526083 | 0.057996 | 89142334  | 89142831  | 89146370  | 8914726!  |
| 460 NA18972 | [2515685 chr11 | 11 | 89249181  | 89256468  | 7288   | 14  | -0.307757 | 0.043992 | 89248682  | 89249680  | 89256349  | 8925658:  |
| 461 NA18972 | [2515685 chr11 | 11 | 89284287  | 89291838  | 7552   | 16  | -0.314859 | 0.025036 | 89283986  | 89284589  | 89291246  | 8929243:  |
| 462 NA18972 | [2515685 chr11 | 11 | 89298262  | 89305814  | 7553   | 17  | -0.314859 | 0.025036 | 89297670  | 89298855  | 89305513  | 8930611!  |
| 463 NA18972 | [2515685 chr11 | 11 | 89334170  | 89336330  | 2161   | 4   | -0.466568 | 0.082019 | 89333817  | 89334523  | 89336193  | 8933646:  |
| 464 NA18972 | [2515685 chr11 | 11 | 89438807  | 89450293  | 11487  | 16  | -0.412005 | 0.042442 | 89438380  | 89439235  | 89449639  | 8945094:  |
| 465 NA18972 | [2515685 chr11 | 11 | 106741436 | 106751096 | 9661   | 10  | -0.646901 | 0.054031 | 106733574 | 106744561 | 106747971 | 10675483: |
| 466 NA18972 | [2515685 chr11 | 11 | 113977904 | 114010887 | 32984  | 47  | 0.471025  | 0.023959 | 113976911 | 113978897 | 114007762 | 11401698: |
| 467 NA18972 | [2515685 chr11 | 11 | 134107699 | 134110673 | 2975   | 3   | 1.055501  | 0.094923 | 134106591 | 134108808 | 134109982 | 13411136: |
| 468 NA18972 | [2515685 chr12 | 12 | 398598    | 404873    | 6276   | 14  | -0.506582 | 0.043841 | 398035    | 399161    | 401600    | 408146:   |
| 469 NA18972 | [2515685 chr12 | 12 | 736840    | 744564    | 7725   | 8   | 0.928174  | 0.058158 | 736616    | 737064    | 743734    | 74539:    |
| 470 NA18972 | [2515685 chr12 | 12 | 2113004   | 2127840   | 14837  | 15  | 0.74062   | 0.043109 | 2109107   | 2116538   | 2127279   | 212840:   |
| 471 NA18972 | [2515685 chr12 | 12 | 6113530   | 6117425   | 3896   | 3   | 0.631775  | 0.099233 | 6111640   | 6115421   | 6116289   | 611856:   |
| 472 NA18972 | [2515685 chr12 | 12 | 8262986   | 8270350   | 7365   | 18  | -1.467717 | 0.040816 | 8262374   | 8263598   | 8269654   | 827104:   |
| 473 NA18972 | [2515685 chr12 | 12 | 8424603   | 8443687   | 19085  | 34  | -0.322927 | 0.028132 | 8424249   | 8424958   | 8442906   | 844446:   |
| 474 NA18972 | [2515685 chr12 | 12 | 9439936   | 9445623   | 5688   | 9   | 0.477298  | 0.054679 | 9439574   | 9440298   | 9445247   | 944600:   |
| 475 NA18972 | [2515685 chr12 | 12 | 9527659   | 9624971   | 97313  | 104 | 0.844835  | 0.017598 | 9526872   | 9528447   | 9623223   | 962672:   |
| 476 NA18972 | [2515685 chr12 | 12 | 9646904   | 9649697   | 2794   | 3   | 0.623739  | 0.094708 | 9646692   | 9647116   | 9649433   | 964996:   |
| 477 NA18972 | [2515685 chr12 | 12 | 10472497  | 10487392  | 14896  | 13  | -0.488229 | 0.049143 | 10472016  | 10472979  | 10486385  | 1048840:  |

|             |                |    |           |           |         |      |           |          |           |           |           |          |
|-------------|----------------|----|-----------|-----------|---------|------|-----------|----------|-----------|-----------|-----------|----------|
| 478 NA18972 | [2515685 chr12 | 12 | 11399927  | 11445011  | 45085   | 43   | 0.323692  | 0.025075 | 11399675  | 11400179  | 11444762  | 11445260 |
| 479 NA18972 | [2515685 chr12 | 12 | 30128711  | 30133561  | 4851    | 3    | -4.458224 | 0.196028 | 30128382  | 30129041  | 30132177  | 30134941 |
| 480 NA18972 | [2515685 chr12 | 12 | 30299198  | 30300075  | 878     | 2    | -0.665921 | 0.115992 | 30298960  | 30299436  | 30299822  | 30300321 |
| 481 NA18972 | [2515685 chr12 | 12 | 31156172  | 31245603  | 89432   | 84   | 0.486616  | 0.018366 | 31155571  | 31156773  | 31245343  | 31245861 |
| 482 NA18972 | [2515685 chr12 | 12 | 33869853  | 33870542  | 690     | 2    | -0.733831 | 0.115992 | 33869646  | 33870061  | 33870721  | 33870721 |
| 483 NA18972 | [2515685 chr12 | 12 | 36209410  | 36224658  | 15249   | 15   | -0.306434 | 0.042354 | 36200442  | 36212944  | 36224561  | 36224751 |
| 484 NA18972 | [2515685 chr12 | 12 | 69156878  | 69167930  | 11053   | 11   | 0.844049  | 0.050449 | 69138649  | 69160412  | 69164396  | 69215011 |
| 485 NA18972 | [2515685 chr12 | 12 | 78656134  | 78665261  | 9128    | 9    | -0.458081 | 0.054721 | 78654687  | 78657582  | 78664736  | 78665781 |
| 486 NA18972 | [2515685 chr12 | 12 | 129395501 | 129397499 | 1999    | 14   | -0.385104 | 0.043841 | 129395008 | 129395994 | 129397172 | 12939782 |
| 487 NA18972 | [2515685 chr12 | 12 | 130536356 | 130538845 | 2490    | 4    | -0.4143   | 0.082019 | 130536129 | 130536583 | 130538645 | 13053904 |
| 488 NA18972 | [2515685 chr12 | 12 | 130723571 | 130725298 | 1728    | 3    | -0.50676  | 0.09494  | 130723200 | 130723942 | 130724868 | 13072572 |
| 489 NA18972 | [2515685 chr12 | 12 | 130777013 | 130778340 | 1328    | 2    | -0.846726 | 0.115992 | 130776667 | 130777359 | 130778020 | 13077866 |
| 490 NA18972 | [2515685 chr12 | 12 | 130798727 | 130802870 | 4144    | 5    | -0.97456  | 0.073705 | 130798268 | 130799187 | 130801345 | 13080439 |
| 491 NA18972 | [2515685 chr12 | 12 | 132220467 | 132227014 | 6548    | 6    | 0.370465  | 0.068064 | 132219825 | 132221109 | 132226374 | 13222765 |
| 492 NA18972 | [2515685 chr13 | 13 | 18216440  | 18283441  | 67002   | 28   | -0.326237 | 0.031    | 18215850  | 18217031  | 18282592  | 18284291 |
| 493 NA18972 | [2515685 chr13 | 13 | 25947233  | 25950398  | 3166    | 3    | 3.258217  | 0.158595 | 25946194  | 25948272  | 25949415  | 2595138  |
| 494 NA18972 | [2515685 chr13 | 13 | 31430484  | 31437209  | 6726    | 7    | -0.74323  | 0.064301 | 31430130  | 31430838  | 31436488  | 31437931 |
| 495 NA18972 | [2515685 chr13 | 13 | 33029522  | 33043421  | 13900   | 9    | 0.909085  | 0.056832 | 33000262  | 33034253  | 33042925  | 33043911 |
| 496 NA18972 | [2515685 chr13 | 13 | 33862844  | 33865211  | 2368    | 2    | 0.681839  | 0.116773 | 33862283  | 33863405  | 33864905  | 33865511 |
| 497 NA18972 | [2515685 chr13 | 13 | 56611711  | 56645734  | 34024   | 47   | 0.544651  | 0.023927 | 56610946  | 56612477  | 56645321  | 5664614  |
| 498 NA18972 | [2515685 chr13 | 13 | 62769455  | 62770722  | 1268    | 2    | -0.614093 | 0.117507 | 62769207  | 62769703  | 62770093  | 62771351 |
| 499 NA18972 | [2515685 chr13 | 13 | 69633905  | 69673289  | 39385   | 41   | 0.866837  | 0.026403 | 69633412  | 69634399  | 69672985  | 69673591 |
| 500 NA18972 | [2515685 chr13 | 13 | 110502383 | 110503129 | 747     | 3    | -1.233168 | 0.101445 | 110502225 | 110502541 | 110502890 | 11050336 |
| 501 NA18972 | [2515685 chr13 | 13 | 113079647 | 113086869 | 7223    | 3    | 0.736521  | 0.099301 | 113078890 | 113080404 | 113082138 | 11309434 |
| 502 NA18972 | [2515685 chr14 | 14 | 18435964  | 19494842  | 1058879 | 1599 | -0.498124 | 0.004112 | 18435807  | 18436121  | 19494444  | 19495241 |
| 503 NA18972 | [2515685 chr14 | 14 | 42059344  | 42062997  | 3654    | 2    | 0.596704  | 0.116762 | 42056485  | 42062203  | 42062601  | 42063391 |
| 504 NA18972 | [2515685 chr14 | 14 | 73063409  | 73072875  | 9467    | 8    | 0.388094  | 0.058166 | 73061866  | 73064953  | 73072485  | 73073261 |
| 505 NA18972 | [2515685 chr14 | 14 | 73075916  | 73082530  | 6615    | 8    | 0.642913  | 0.027391 | 73075495  | 73076337  | 73082278  | 73082781 |
| 506 NA18972 | [2515685 chr14 | 14 | 73089743  | 73119729  | 29987   | 25   | 0.642913  | 0.027391 | 73089439  | 73090048  | 73118276  | 73121181 |
| 507 NA18972 | [2515685 chr14 | 14 | 77194461  | 77196644  | 2184    | 2    | 0.818683  | 0.115992 | 77194213  | 77194710  | 77196380  | 77196901 |
| 508 NA18972 | [2515685 chr15 | 15 | 18468372  | 20198094  | 1729723 | 1876 | -0.267315 | 0.0038   | 18467866  | 18468879  | 20197782  | 20198401 |
| 509 NA18972 | [2515685 chr15 | 15 | 20865501  | 20867668  | 2168    | 4    | -0.532616 | 0.082019 | 20865204  | 20865798  | 20867431  | 20867901 |
| 510 NA18972 | [2515685 chr15 | 15 | 20922696  | 20924090  | 1395    | 3    | -0.72714  | 0.094707 | 20922607  | 20922785  | 20923787  | 20924391 |
| 511 NA18972 | [2515685 chr15 | 15 | 21009554  | 21065489  | 55936   | 57   | -0.309558 | 0.021727 | 21006900  | 21011890  | 21065210  | 21065761 |
| 512 NA18972 | [2515685 chr15 | 15 | 21605983  | 21614634  | 8652    | 7    | 0.763868  | 0.070352 | 21605507  | 21606459  | 21612298  | 21636691 |
| 513 NA18972 | [2515685 chr15 | 15 | 24986053  | 24992250  | 6198    | 7    | 0.840218  | 0.063074 | 24985426  | 24986680  | 24991680  | 24992821 |
| 514 NA18972 | [2515685 chr15 | 15 | 26135294  | 26137335  | 2042    | 4    | -0.545519 | 0.08202  | 26134997  | 26135591  | 26137216  | 26137451 |
| 515 NA18972 | [2515685 chr15 | 15 | 26636310  | 26644325  | 8016    | 22   | -0.353152 | 0.034973 | 26636090  | 26636531  | 26644113  | 26644531 |
| 516 NA18972 | [2515685 chr15 | 15 | 26679206  | 26681010  | 1805    | 5    | -0.405273 | 0.07336  | 26678984  | 26679429  | 26680811  | 26681211 |
| 517 NA18972 | [2515685 chr15 | 15 | 26695549  | 26697710  | 2162    | 4    | -0.547766 | 0.082019 | 26695312  | 26695786  | 26697414  | 26698001 |
| 518 NA18972 | [2515685 chr15 | 15 | 28698697  | 28877402  | 178706  | 173  | -0.438066 | 0.012566 | 28697412  | 28699983  | 28876966  | 28877831 |
| 519 NA18972 | [2515685 chr15 | 15 | 29545985  | 29552829  | 6845    | 2    | -0.727652 | 0.115993 | 29545164  | 29546806  | 29552488  | 29553171 |
| 520 NA18972 | [2515685 chr15 | 15 | 29704000  | 29807410  | 103411  | 86   | -0.285618 | 0.017779 | 29703681  | 29704319  | 29806876  | 29807941 |
| 521 NA18972 | [2515685 chr15 | 15 | 30296241  | 30304807  | 8567    | 5    | 0.540322  | 0.073563 | 30295664  | 30296819  | 30302471  | 30308721 |
| 522 NA18972 | [2515685 chr15 | 15 | 32469460  | 32508118  | 38659   | 42   | 0.293529  | 0.02546  | 32469063  | 32469858  | 32506908  | 32509321 |
| 523 NA18972 | [2515685 chr15 | 15 | 32515477  | 32592621  | 77145   | 62   | 0.689799  | 0.021479 | 32514954  | 32516000  | 32592260  | 32592981 |
| 524 NA18972 | [2515685 chr15 | 15 | 32594011  | 32598425  | 4415    | 3    | 0.519015  | 0.094708 | 32593777  | 32594245  | 32597169  | 32599681 |
| 525 NA18972 | [2515685 chr15 | 15 | 32615681  | 32653413  | 37733   | 42   | 0.294182  | 0.025312 | 32615284  | 32616079  | 32653144  | 32653681 |
| 526 NA18972 | [2515685 chr15 | 15 | 43106834  | 43111174  | 4341    | 5    | 0.517429  | 0.073555 | 43106498  | 43107171  | 43111071  | 43111127 |
| 527 NA18972 | [2515685 chr15 | 15 | 59490762  | 59495993  | 5232    | 2    | -0.839362 | 0.115991 | 59490146  | 59491378  | 59491114  | 59497871 |
| 528 NA18972 | [2515685 chr15 | 15 | 74671388  | 74682854  | 11467   | 9    | 0.876144  | 0.056766 | 74671122  | 74671654  | 74680518  | 74689511 |
| 529 NA18972 | [2515685 chr15 | 15 | 75117585  | 75119946  | 2362    | 4    | -2.881875 | 0.133204 | 75117343  | 75117827  | 75119741  | 75120151 |
| 530 NA18972 | [2515685 chr15 | 15 | 100090726 | 100098386 | 7661    | 3    | 0.504421  | 0.094707 | 100090390 | 100091062 | 100096050 | 10010235 |
| 531 NA18972 | [2515685 chr15 | 15 | 100109640 | 100122682 | 13043   | 98   | 0.968883  | 0.016589 | 100108905 | 100110376 | 100122315 | 10012305 |
| 532 NA18972 | [2515685 chr15 | 15 | 100274594 | 100304607 | 30014   | 12   | 0.416333  | 0.047354 | 100269190 | 100276930 | 100302843 | 10030637 |



|             |                |    |          |          |        |     |           |          |          |          |          |          |
|-------------|----------------|----|----------|----------|--------|-----|-----------|----------|----------|----------|----------|----------|
| 533 NA18972 | [2515685 chr16 | 16 | 946002   | 948831   | 2830   | 2   | -1.129443 | 0.118283 | 945660   | 946345   | 947314   | 950345   |
| 534 NA18972 | [2515685 chr16 | 16 | 2120855  | 2126876  | 6022   | 6   | -0.3871   | 0.066968 | 2118476  | 2122769  | 2125012  | 2128747  |
| 535 NA18972 | [2515685 chr16 | 16 | 5047065  | 5050307  | 3243   | 3   | -0.912965 | 0.100136 | 5046136  | 5047994  | 5049954  | 5050660  |
| 536 NA18972 | [2515685 chr16 | 16 | 5287117  | 5290665  | 3549   | 2   | -0.914331 | 0.162625 | 5286149  | 5288085  | 5288751  | 5293272  |
| 537 NA18972 | [2515685 chr16 | 16 | 14696077 | 14709851 | 13775  | 11  | 0.42135   | 0.049459 | 14695838 | 14696316 | 14709124 | 14710571 |
| 538 NA18972 | [2515685 chr16 | 16 | 14735195 | 14748973 | 13779  | 11  | 0.42135   | 0.049459 | 14734956 | 14735434 | 14748246 | 14749701 |
| 539 NA18972 | [2515685 chr16 | 16 | 14896194 | 14916960 | 20767  | 49  | -0.286311 | 0.023434 | 14896075 | 14896314 | 14915993 | 14917921 |
| 540 NA18972 | [2515685 chr16 | 16 | 14955818 | 15031089 | 75272  | 69  | -0.574178 | 0.01992  | 14955356 | 14956281 | 15030750 | 15031421 |
| 541 NA18972 | [2515685 chr16 | 16 | 15154075 | 15158023 | 3949   | 7   | -0.393681 | 0.062001 | 15153850 | 15154301 | 15158005 | 15158047 |
| 542 NA18972 | [2515685 chr16 | 16 | 15233427 | 15235940 | 2514   | 3   | 0.513491  | 0.095001 | 15233376 | 15233478 | 15235643 | 15236231 |
| 543 NA18972 | [2515685 chr16 | 16 | 16295631 | 16315613 | 19983  | 43  | -0.281543 | 0.025016 | 16295446 | 16295816 | 16314647 | 16316571 |
| 544 NA18972 | [2515685 chr16 | 16 | 16470058 | 16471374 | 1317   | 2   | -0.739673 | 0.120262 | 16469461 | 16470656 | 16471174 | 16471571 |
| 545 NA18972 | [2515685 chr16 | 16 | 16633469 | 16639120 | 5652   | 4   | 0.602771  | 0.082174 | 16632502 | 16634437 | 16638386 | 16639857 |
| 546 NA18972 | [2515685 chr16 | 16 | 18399248 | 18419219 | 19972  | 43  | -0.281537 | 0.025016 | 18398282 | 18400214 | 18419034 | 18419407 |
| 547 NA18972 | [2515685 chr16 | 16 | 21321436 | 21323686 | 2251   | 13  | 0.335493  | 0.045496 | 21321333 | 21321540 | 21323533 | 21323831 |
| 548 NA18972 | [2515685 chr16 | 16 | 21432701 | 21502620 | 69920  | 63  | 0.280953  | 0.020667 | 21432349 | 21433054 | 21501101 | 21504141 |
| 549 NA18972 | [2515685 chr16 | 16 | 21658380 | 21716943 | 58564  | 51  | 0.2534    | 0.02319  | 21658168 | 21658592 | 21716666 | 21717227 |
| 550 NA18972 | [2515685 chr16 | 16 | 21753870 | 21756137 | 2268   | 15  | 0.340631  | 0.042355 | 21753767 | 21753974 | 21755984 | 21756291 |
| 551 NA18972 | [2515685 chr16 | 16 | 22452875 | 22454874 | 2000   | 13  | 0.340025  | 0.045496 | 22452722 | 22453028 | 22454771 | 22454971 |
| 552 NA18972 | [2515685 chr16 | 16 | 22487031 | 22618743 | 131713 | 118 | 0.341759  | 0.015106 | 22486658 | 22487404 | 22617181 | 22620301 |
| 553 NA18972 | [2515685 chr16 | 16 | 29300574 | 29302684 | 2111   | 11  | 0.33344   | 0.049459 | 29300408 | 29300741 | 29302391 | 29302971 |
| 554 NA18972 | [2515685 chr16 | 16 | 29402841 | 29404254 | 1414   | 9   | 0.332705  | 0.054679 | 29402738 | 29402945 | 29404073 | 29404431 |
| 555 NA18972 | [2515685 chr16 | 16 | 29530132 | 29534613 | 4482   | 7   | 0.497947  | 0.062001 | 29529861 | 29530403 | 29534196 | 29535037 |
| 556 NA18972 | [2515685 chr16 | 16 | 30101364 | 30102578 | 1215   | 2   | -0.995828 | 0.118817 | 30101045 | 30101684 | 30102223 | 30102937 |
| 557 NA18972 | [2515685 chr16 | 16 | 30142181 | 30144224 | 2044   | 14  | 0.336939  | 0.043841 | 30142078 | 30142285 | 30144043 | 30144401 |
| 558 NA18972 | [2515685 chr16 | 16 | 32073573 | 32075147 | 1575   | 4   | -0.510521 | 0.082019 | 32073268 | 32073879 | 32074517 | 32075771 |
| 559 NA18972 | [2515685 chr16 | 16 | 32106365 | 32107552 | 1188   | 4   | -0.414727 | 0.082019 | 32106136 | 32106595 | 32107036 | 32108061 |
| 560 NA18972 | [2515685 chr16 | 16 | 32151951 | 32197170 | 45220  | 107 | -0.361864 | 0.015958 | 32151724 | 32152178 | 32196926 | 32197417 |
| 561 NA18972 | [2515685 chr16 | 16 | 32213712 | 32219640 | 5929   | 11  | 0.292533  | 0.049459 | 32213463 | 32213961 | 32219531 | 32219747 |
| 562 NA18972 | [2515685 chr16 | 16 | 32565127 | 32615155 | 50029  | 128 | -0.377561 | 0.014576 | 32563508 | 32566747 | 32614961 | 32615351 |
| 563 NA18972 | [2515685 chr16 | 16 | 32659504 | 32660703 | 1200   | 5   | -0.379414 | 0.07336  | 32659001 | 32660007 | 32660474 | 32660937 |
| 564 NA18972 | [2515685 chr16 | 16 | 32690003 | 32691563 | 1561   | 4   | -0.510523 | 0.082019 | 32689373 | 32690634 | 32691272 | 32691851 |
| 565 NA18972 | [2515685 chr16 | 16 | 33016481 | 33018043 | 1563   | 4   | -0.510521 | 0.082019 | 33016187 | 33016775 | 33017413 | 33018677 |
| 566 NA18972 | [2515685 chr16 | 16 | 33047346 | 33048548 | 1203   | 5   | -0.379413 | 0.07336  | 33047117 | 33047575 | 33048045 | 33049057 |
| 567 NA18972 | [2515685 chr16 | 16 | 33092915 | 33204066 | 111152 | 252 | -0.371012 | 0.010385 | 33092688 | 33093142 | 33203888 | 33204247 |
| 568 NA18972 | [2515685 chr16 | 16 | 34321792 | 34606125 | 284334 | 322 | -0.587366 | 0.009256 | 34317185 | 34323706 | 34605058 | 34607197 |
| 569 NA18972 | [2515685 chr16 | 16 | 54353377 | 54380125 | 26749  | 29  | -0.557105 | 0.031406 | 54353335 | 54353419 | 54379862 | 54380381 |
| 570 NA18972 | [2515685 chr16 | 16 | 57204541 | 57207585 | 3045   | 3   | 5.150148  | 0.209405 | 57204170 | 57204913 | 57206938 | 57208237 |
| 571 NA18972 | [2515685 chr16 | 16 | 57404028 | 57405423 | 1396   | 2   | -0.677568 | 0.115992 | 57403711 | 57404346 | 57405139 | 57405707 |
| 572 NA18972 | [2515685 chr16 | 16 | 68533980 | 68564761 | 30782  | 48  | -0.256078 | 0.023677 | 68533527 | 68534434 | 68563823 | 68565701 |
| 573 NA18972 | [2515685 chr16 | 16 | 68602449 | 68666721 | 64273  | 59  | -0.334656 | 0.011088 | 68602144 | 68602755 | 68666385 | 68667051 |
| 574 NA18972 | [2515685 chr16 | 16 | 68702274 | 68791353 | 89080  | 122 | -0.334656 | 0.011088 | 68701593 | 68702955 | 68789873 | 68792837 |
| 575 NA18972 | [2515685 chr16 | 16 | 72920370 | 73020378 | 100009 | 151 | -0.263901 | 0.013351 | 72919818 | 72920922 | 73020260 | 73020497 |
| 576 NA18972 | [2515685 chr16 | 16 | 76928915 | 76942282 | 13368  | 11  | 0.65206   | 0.050505 | 76928609 | 76929221 | 76941602 | 76942967 |
| 577 NA18972 | [2515685 chr16 | 16 | 84562720 | 84565235 | 2516   | 11  | 0.555764  | 0.04946  | 84561685 | 84563756 | 84565142 | 84565321 |
| 578 NA18972 | [2515685 chr16 | 16 | 86669849 | 86672660 | 2812   | 2   | -0.780527 | 0.115992 | 86669288 | 86670411 | 86671217 | 86674107 |
| 579 NA18972 | [2515685 chr16 | 16 | 87996746 | 87999199 | 2454   | 3   | -0.479169 | 0.094707 | 87996062 | 87997431 | 87998799 | 87999601 |
| 580 NA18972 | [2515685 chr17 | 17 | 966845   | 969578   | 2734   | 21  | 0.351449  | 0.035796 | 966537   | 967154   | 969378   | 969775   |
| 581 NA18972 | [2515685 chr17 | 17 | 13561692 | 13563867 | 2176   | 2   | -0.609557 | 0.115992 | 13560483 | 13562902 | 13563387 | 13564341 |
| 582 NA18972 | [2515685 chr17 | 17 | 16657833 | 16665630 | 7798   | 12  | -0.671701 | 0.048167 | 16657486 | 16658180 | 16665353 | 16665901 |
| 583 NA18972 | [2515685 chr17 | 17 | 18299050 | 18331739 | 32690  | 39  | 0.451105  | 0.026277 | 18298294 | 18299807 | 18331509 | 18331971 |
| 584 NA18972 | [2515685 chr17 | 17 | 18331739 | 18332345 | 607    | 2   | -1.141127 | 0.117757 | 18331509 | 18331970 | 18331978 | 18332717 |
| 585 NA18972 | [2515685 chr17 | 17 | 18944963 | 18953131 | 8169   | 11  | 0.482879  | 0.049459 | 18944775 | 18945151 | 18952429 | 18953837 |
| 586 NA18972 | [2515685 chr17 | 17 | 19026058 | 19040012 | 13955  | 18  | 0.401929  | 0.038664 | 19025712 | 19026404 | 19039666 | 19040351 |
| 587 NA18972 | [2515685 chr17 | 17 | 19070936 | 19079161 | 8226   | 11  | 0.482878  | 0.049459 | 19070686 | 19071187 | 19078459 | 19079867 |

|             |                |    |          |          |       |    |           |          |          |          |          |          |
|-------------|----------------|----|----------|----------|-------|----|-----------|----------|----------|----------|----------|----------|
| 588 NA18972 | [2515685 chr17 | 17 | 19444484 | 19450327 | 5844  | 6  | -0.368018 | 0.066968 | 19443277 | 19445692 | 19449766 | 1945088! |
| 589 NA18972 | [2515685 chr17 | 17 | 20299935 | 20300531 | 597   | 2  | -1.141128 | 0.117757 | 20299568 | 20300303 | 20300311 | 2030075  |
| 590 NA18972 | [2515685 chr17 | 17 | 20300531 | 20330997 | 30467 | 36 | 0.410984  | 0.02734  | 20300311 | 20300751 | 20329940 | 2033205! |
| 591 NA18972 | [2515685 chr17 | 17 | 20397281 | 20397953 | 673   | 2  | -0.65689  | 0.115992 | 20397031 | 20397532 | 20397726 | 2039818! |
| 592 NA18972 | [2515685 chr17 | 17 | 21714678 | 21723448 | 8771  | 8  | -0.298836 | 0.057996 | 21681992 | 21716938 | 21723176 | 2172372! |
| 593 NA18972 | [2515685 chr17 | 17 | 21942186 | 21955530 | 13345 | 22 | -0.322144 | 0.034973 | 21941754 | 21942618 | 21955191 | 2195586! |
| 594 NA18972 | [2515685 chr17 | 17 | 31429456 | 31508214 | 78759 | 89 | 0.524263  | 0.008658 | 31429255 | 31429658 | 31507959 | 3150847! |
| 595 NA18972 | [2515685 chr17 | 17 | 31529693 | 31578624 | 48932 | 65 | 0.524263  | 0.008658 | 31529243 | 31530143 | 31578609 | 3157864! |
| 596 NA18972 | [2515685 chr17 | 17 | 31617737 | 31680187 | 62451 | 73 | 0.524263  | 0.008658 | 31617287 | 31618187 | 31680172 | 3168020! |
| 597 NA18972 | [2515685 chr17 | 17 | 31832940 | 31838190 | 5251  | 11 | 0.366712  | 0.028998 | 31832684 | 31833196 | 31837915 | 3183846! |
| 598 NA18972 | [2515685 chr17 | 17 | 31841228 | 31865925 | 24698 | 14 | 0.366712  | 0.028998 | 31840838 | 31841619 | 31865807 | 3186604! |
| 599 NA18972 | [2515685 chr17 | 17 | 31883801 | 31889223 | 5423  | 10 | 0.477476  | 0.051873 | 31883351 | 31884251 | 31888786 | 3188966  |
| 600 NA18972 | [2515685 chr17 | 17 | 32829500 | 32835174 | 5675  | 6  | 0.866699  | 0.069305 | 32828825 | 32830175 | 32833793 | 3283655! |
| 601 NA18972 | [2515685 chr17 | 17 | 32852219 | 32855919 | 3701  | 2  | -0.584844 | 0.115993 | 32851118 | 32853321 | 32854337 | 3285750! |
| 602 NA18972 | [2515685 chr17 | 17 | 33308015 | 33311261 | 3247  | 2  | 0.626644  | 0.115992 | 33307576 | 33308455 | 33310958 | 3331156! |
| 603 NA18972 | [2515685 chr17 | 17 | 33324385 | 33348268 | 23884 | 14 | 0.370363  | 0.028132 | 33323841 | 33324930 | 33347873 | 3334866! |
| 604 NA18972 | [2515685 chr17 | 17 | 33351216 | 33356742 | 5527  | 13 | 0.370363  | 0.028132 | 33351036 | 33351397 | 33356307 | 3335717! |
| 605 NA18972 | [2515685 chr17 | 17 | 33395919 | 33408561 | 12643 | 10 | -1.038299 | 0.054896 | 33395884 | 33395955 | 33408077 | 3340904! |
| 606 NA18972 | [2515685 chr17 | 17 | 33423761 | 33430851 | 7091  | 11 | -1.450802 | 0.052844 | 33422990 | 33424532 | 33428591 | 3352929! |
| 607 NA18972 | [2515685 chr17 | 17 | 33553833 | 33559378 | 5546  | 12 | 0.374542  | 0.028998 | 33553386 | 33554280 | 33559198 | 3355955! |
| 608 NA18972 | [2515685 chr17 | 17 | 33562321 | 33586158 | 23838 | 13 | 0.374542  | 0.028998 | 33561930 | 33562713 | 33586040 | 3358627! |
| 609 NA18972 | [2515685 chr17 | 17 | 33603180 | 33659558 | 56379 | 76 | -0.78772  | 0.019129 | 33602409 | 33603951 | 33658997 | 3366011! |
| 610 NA18972 | [2515685 chr17 | 17 | 36675530 | 36684103 | 8574  | 9  | -0.915362 | 0.056164 | 36675011 | 36676049 | 36683560 | 3668464! |
| 611 NA18972 | [2515685 chr17 | 17 | 41758618 | 41766457 | 7840  | 15 | 0.262468  | 0.042355 | 41758147 | 41759090 | 41766006 | 4176690! |
| 612 NA18972 | [2515685 chr17 | 17 | 42905976 | 42912650 | 6675  | 3  | 1.029402  | 0.116947 | 42905585 | 42906368 | 42911014 | 4291428! |
| 613 NA18972 | [2515685 chr17 | 17 | 42951389 | 42952568 | 1180  | 2  | 0.784466  | 0.117125 | 42951158 | 42951620 | 42952130 | 4295300! |
| 614 NA18972 | [2515685 chr17 | 17 | 42970703 | 43026670 | 55968 | 86 | -0.64491  | 0.017916 | 42970185 | 42971221 | 43025568 | 4302777! |
| 615 NA18972 | [2515685 chr17 | 17 | 48390657 | 48424627 | 33971 | 29 | -0.942629 | 0.03203  | 48390330 | 48390985 | 48424439 | 4842481! |
| 616 NA18972 | [2515685 chr17 | 17 | 54718891 | 54720406 | 1516  | 2  | -0.901659 | 0.118763 | 54718493 | 54719289 | 54719841 | 5472097! |
| 617 NA18972 | [2515685 chr17 | 17 | 55383504 | 55385003 | 1500  | 2  | 0.616971  | 0.119263 | 55383216 | 55383792 | 55384708 | 5538529! |
| 618 NA18972 | [2515685 chr17 | 17 | 55434888 | 55446753 | 11866 | 21 | -0.263464 | 0.035857 | 55434445 | 55435332 | 55446488 | 5544701! |
| 619 NA18972 | [2515685 chr17 | 17 | 55452232 | 55454279 | 2048  | 3  | -0.476847 | 0.094708 | 55451888 | 55452577 | 55454017 | 5545454! |
| 620 NA18972 | [2515685 chr17 | 17 | 55555949 | 55560512 | 4564  | 3  | -0.476847 | 0.094708 | 55555086 | 55556813 | 55558252 | 5559167! |
| 621 NA18972 | [2515685 chr17 | 17 | 55806192 | 55811256 | 5065  | 2  | -1.132399 | 0.1214   | 55687363 | 55808452 | 55808996 | 5582897! |
| 622 NA18972 | [2515685 chr17 | 17 | 75701724 | 75705577 | 3854  | 3  | 0.516938  | 0.09619  | 75701401 | 75702047 | 75704739 | 7570641! |
| 623 NA18972 | [2515685 chr18 | 18 | 306276   | 307859   | 1584  | 2  | 0.609476  | 0.116787 | 305966   | 306586   | 307330   | 308385   |
| 624 NA18972 | [2515685 chr18 | 18 | 3977408  | 3980417  | 3010  | 3  | 0.602517  | 0.103177 | 3977018  | 3977799  | 3979612  | 3981223  |
| 625 NA18972 | [2515685 chr18 | 18 | 9733534  | 9744702  | 11169 | 11 | -0.894485 | 0.05054  | 9733017  | 9734051  | 9744118  | 974528!  |
| 626 NA18972 | [2515685 chr18 | 18 | 9805250  | 9806206  | 957   | 2  | -1.061462 | 0.117483 | 9804637  | 9805863  | 9806038  | 980637!  |
| 627 NA18972 | [2515685 chr18 | 18 | 14244200 | 14326118 | 81919 | 27 | -0.367266 | 0.031569 | 14243872 | 14244529 | 14325709 | 1432652! |
| 628 NA18972 | [2515685 chr18 | 18 | 14541780 | 14558267 | 16488 | 22 | -0.37594  | 0.034973 | 14540900 | 14542661 | 14558066 | 1455846! |
| 629 NA18972 | [2515685 chr18 | 18 | 15359177 | 15362100 | 2924  | 2  | 0.648925  | 0.115993 | 15356606 | 15361749 | 15361749 | 1536245! |
| 630 NA18972 | [2515685 chr18 | 18 | 28142218 | 28143399 | 1182  | 2  | 0.74529   | 0.122038 | 28141854 | 28142583 | 28143055 | 2814374! |
| 631 NA18972 | [2515685 chr18 | 18 | 36514289 | 36521090 | 6802  | 6  | -1.04015  | 0.069492 | 36513759 | 36514820 | 36520512 | 3652166! |
| 632 NA18972 | [2515685 chr18 | 18 | 42791895 | 42815428 | 23534 | 23 | -0.537051 | 0.034204 | 42749992 | 42796523 | 42810800 | 4288915! |
| 633 NA18972 | [2515685 chr18 | 18 | 61874791 | 61883105 | 8315  | 9  | -1.044654 | 0.056564 | 61874483 | 61875100 | 61882738 | 6188347! |
| 634 NA18972 | [2515685 chr18 | 18 | 61917747 | 61920171 | 2425  | 4  | 3.39138   | 0.151893 | 61917522 | 61917973 | 61919646 | 6192069! |
| 635 NA18972 | [2515685 chr18 | 18 | 63110008 | 63117706 | 7699  | 9  | -0.913826 | 0.056986 | 63109644 | 63110373 | 63116010 | 6311940! |
| 636 NA18972 | [2515685 chr18 | 18 | 64896052 | 64907736 | 11685 | 13 | -0.852078 | 0.046693 | 64894789 | 64897315 | 64907228 | 6490824! |
| 637 NA18972 | [2515685 chr18 | 18 | 74229522 | 74234275 | 4754  | 32 | -0.286857 | 0.028998 | 74229210 | 74229835 | 74234139 | 7423441! |
| 638 NA18972 | [2515685 chr18 | 18 | 74297715 | 74299391 | 1677  | 5  | 0.659481  | 0.07336  | 74297243 | 74298187 | 74299167 | 7429961! |
| 639 NA18972 | [2515685 chr18 | 18 | 74373005 | 74380900 | 7896  | 11 | 0.266937  | 0.049459 | 74372064 | 74373947 | 74380208 | 7438159! |
| 640 NA18972 | [2515685 chr18 | 18 | 74392800 | 74397377 | 4578  | 3  | 1.024019  | 0.100986 | 74390826 | 74394774 | 74396965 | 7439779! |
| 641 NA18972 | [2515685 chr19 | 19 | 35104    | 68112    | 33009 | 16 | 0.397433  | 0.04101  | 34925    | 35284    | 65522    | 73262    |
| 642 NA18972 | [2515685 chr19 | 19 | 310414   | 312953   | 2540  | 14 | -0.629753 | 0.043841 | 309687   | 311142   | 312913   | 312994   |

|             |                |    |          |          |         |     |                    |          |          |          |          |
|-------------|----------------|----|----------|----------|---------|-----|--------------------|----------|----------|----------|----------|
| 643 NA18972 | [2515685 chr19 | 19 | 8708780  | 8760468  | 51689   | 89  | -0.34608 0.017388  | 8708296  | 8709264  | 8760209  | 8760727  |
| 644 NA18972 | [2515685 chr19 | 19 | 20388989 | 20510144 | 121156  | 67  | -0.461244 0.020891 | 20388802 | 20389176 | 20509558 | 2051073  |
| 645 NA18972 | [2515685 chr19 | 19 | 23007841 | 23014812 | 6972    | 7   | 0.805806 0.064248  | 22990964 | 23010431 | 23014157 | 23015461 |
| 646 NA18972 | [2515685 chr19 | 19 | 23108259 | 23109446 | 1188    | 2   | -1.073217 0.13028  | 23107903 | 23108615 | 23108879 | 2311001  |
| 647 NA18972 | [2515685 chr19 | 19 | 24147818 | 24149281 | 1464    | 5   | 0.375864 0.074156  | 24147801 | 24147835 | 24149267 | 24149291 |
| 648 NA18972 | [2515685 chr19 | 19 | 24152586 | 24154351 | 1766    | 17  | -0.353046 0.039785 | 24152557 | 24152616 | 24153348 | 24155351 |
| 649 NA18972 | [2515685 chr19 | 19 | 40540866 | 40554347 | 13482   | 15  | -0.524098 0.042585 | 40540646 | 40541086 | 40554020 | 40554671 |
| 650 NA18972 | [2515685 chr19 | 19 | 41450124 | 41493675 | 43552   | 28  | 0.479646 0.031     | 41421528 | 41452714 | 41491085 | 41497851 |
| 651 NA18972 | [2515685 chr19 | 19 | 41532761 | 41540854 | 8094    | 2   | 0.692566 0.115993  | 41532090 | 41533433 | 41538691 | 41543017 |
| 652 NA18972 | [2515685 chr19 | 19 | 42450410 | 42486383 | 35974   | 32  | 0.45583 0.028998   | 42413600 | 42453000 | 42486279 | 42486487 |
| 653 NA18972 | [2515685 chr19 | 19 | 42534682 | 42540410 | 5729    | 2   | -0.61563 0.115993  | 42530910 | 42537272 | 42537820 | 42544717 |
| 654 NA18972 | [2515685 chr19 | 19 | 43974456 | 43977294 | 2839    | 2   | -0.597307 0.11667  | 43973697 | 43975216 | 43975620 | 43978961 |
| 655 NA18972 | [2515685 chr19 | 19 | 46040790 | 46083728 | 42939   | 60  | -0.387218 0.021466 | 46040628 | 46040952 | 46083383 | 46084077 |
| 656 NA18972 | [2515685 chr19 | 19 | 53098959 | 53154327 | 55369   | 103 | -0.393643 0.016165 | 53098941 | 53098977 | 53152350 | 53156301 |
| 657 NA18972 | [2515685 chr19 | 19 | 55285877 | 55336157 | 50281   | 104 | -0.37422 0.016085  | 55285730 | 55286025 | 55335244 | 55337071 |
| 658 NA18972 | [2515685 chr19 | 19 | 56788987 | 56795867 | 6881    | 7   | 0.338473 0.062465  | 56788678 | 56789297 | 56795672 | 56796061 |
| 659 NA18972 | [2515685 chr19 | 19 | 56824422 | 56827216 | 2795    | 5   | -0.974775 0.076053 | 56824136 | 56824709 | 56826331 | 56828107 |
| 660 NA18972 | [2515685 chr19 | 19 | 56827216 | 56836311 | 9096    | 7   | -4.826337 0.135302 | 56826331 | 56828101 | 56834905 | 56837711 |
| 661 NA18972 | [2515685 chr19 | 19 | 56836311 | 56841964 | 5654    | 9   | -1.252548 0.062304 | 56834905 | 56837718 | 56841608 | 56842327 |
| 662 NA18972 | [2515685 chr19 | 19 | 58209430 | 58245460 | 36031   | 28  | -0.785436 0.031318 | 58208997 | 58209863 | 58245024 | 58245891 |
| 663 NA18972 | [2515685 chr19 | 19 | 59247755 | 59252061 | 4307    | 5   | 0.763752 0.074727  | 59246427 | 59249084 | 59251854 | 59252261 |
| 664 NA18972 | [2515685 chr19 | 19 | 60958920 | 60976029 | 17110   | 15  | -0.257065 0.042354 | 60957933 | 60959907 | 60975748 | 60976311 |
| 665 NA18972 | [2515685 chr20 | 20 | 15249645 | 15251805 | 2161    | 2   | -0.939549 0.11668  | 15249381 | 15249909 | 15251287 | 15252327 |
| 666 NA18972 | [2515685 chr20 | 20 | 23904341 | 24588403 | 684063  | 16  | -0.342666 0.04101  | 23887613 | 23907810 | 24584934 | 24682851 |
| 667 NA18972 | [2515685 chr20 | 20 | 26147697 | 26161501 | 13805   | 23  | -0.340689 0.034204 | 26147451 | 26147944 | 26161227 | 26161771 |
| 668 NA18972 | [2515685 chr20 | 20 | 36463661 | 36465765 | 2105    | 3   | -0.7977 0.094709   | 36463099 | 36464224 | 36465494 | 36466037 |
| 669 NA18972 | [2515685 chr20 | 20 | 59979365 | 59980324 | 960     | 3   | 0.482103 0.094708  | 59979109 | 59979622 | 59979994 | 59980657 |
| 670 NA18972 | [2515685 chr20 | 20 | 62066380 | 62068214 | 1835    | 6   | 1.816561 0.063476  | 62066146 | 62066615 | 62067671 | 62068751 |
| 671 NA18972 | [2515685 chr21 | 21 | 10202303 | 13299718 | 3097416 | 8   | 0.386494 0.066968  | 10201954 | 10202652 | 13294622 | 13304817 |
| 672 NA18972 | [2515685 chr21 | 21 | 14143702 | 14203404 | 59703   | 25  | -0.302728 0.032808 | 14142926 | 14144478 | 14202465 | 14204347 |
| 673 NA18972 | [2515685 chr21 | 21 | 22576580 | 22588071 | 11492   | 12  | -3.305177 0.090623 | 22576051 | 22577109 | 22587425 | 22588711 |
| 674 NA18972 | [2515685 chr21 | 21 | 46880556 | 46882311 | 1756    | 4   | 0.453775 0.08202   | 46880148 | 46880965 | 46881964 | 46882651 |
| 675 NA18972 | [2515685 chr22 | 22 | 14434210 | 14840394 | 406185  | 741 | -0.283844 0.002716 | 14432999 | 14435421 | 14840170 | 14840611 |
| 676 NA18972 | [2515685 chr22 | 22 | 17031183 | 18447368 | 1416186 | 778 | -0.283844 0.002716 | 17030887 | 17031480 | 18446980 | 18447751 |
| 677 NA18972 | [2515685 chr22 | 22 | 18493287 | 19447194 | 953908  | 592 | -0.283844 0.002716 | 18493034 | 18493540 | 19416806 | 19449921 |
| 678 NA18972 | [2515685 chr22 | 22 | 19789638 | 20122362 | 332725  | 514 | -0.283844 0.002716 | 19788642 | 19790634 | 20122043 | 20122681 |
| 679 NA18972 | [2515685 chr22 | 22 | 20137248 | 20243687 | 106440  | 148 | -0.283844 0.002716 | 20136561 | 20137935 | 20240961 | 20302281 |
| 680 NA18972 | [2515685 chr22 | 22 | 22600453 | 22673602 | 73150   | 119 | -0.313024 0.013176 | 22598667 | 22602240 | 22673317 | 22673887 |
| 681 NA18972 | [2515685 chr22 | 22 | 22683930 | 22724551 | 40622   | 45  | -0.313024 0.013176 | 22681309 | 22686552 | 22723330 | 22725771 |
| 682 NA18972 | [2515685 chr22 | 22 | 22957616 | 22986040 | 28425   | 35  | -0.305717 0.027727 | 22957352 | 22957880 | 22985733 | 22986347 |
| 683 NA18972 | [2515685 chr22 | 22 | 23334264 | 23379864 | 45601   | 39  | -0.26556 0.026267  | 23329563 | 23336990 | 23379778 | 23379957 |
| 684 NA18972 | [2515685 chr22 | 22 | 24038971 | 24040662 | 1692    | 2   | -0.624911 0.115993 | 24038379 | 24039563 | 24040094 | 24041237 |
| 685 NA18972 | [2515685 chr22 | 22 | 24286330 | 24294617 | 8288    | 11  | 0.257351 0.049526  | 24286052 | 24286608 | 24293866 | 24295361 |
| 686 NA18972 | [2515685 chr22 | 22 | 30186146 | 30188272 | 2127    | 2   | 0.640835 0.124135  | 30184767 | 30187526 | 30187849 | 30188691 |
| 687 NA18972 | [2515685 chr22 | 22 | 33619409 | 33623490 | 4082    | 5   | 0.854681 0.073378  | 33618939 | 33619879 | 33622642 | 33624331 |
| 688 NA18972 | [2515685 chr22 | 22 | 35283415 | 35285342 | 1928    | 2   | 0.663384 0.118262  | 35283116 | 35283715 | 35284950 | 35285731 |
| 689 NA18972 | [2515685 chr22 | 22 | 36466389 | 36468008 | 1620    | 2   | -0.602367 0.115992 | 36466071 | 36466707 | 36467496 | 36468521 |
| 690 NA18972 | [2515685 chr22 | 22 | 37617530 | 37624057 | 6528    | 8   | -0.761371 0.062064 | 37616333 | 37618728 | 37621331 | 37627051 |
| 691 NA18972 | [2515685 chr22 | 22 | 41235714 | 41274269 | 38556   | 27  | 0.354237 0.031575  | 41235467 | 41235962 | 41274060 | 41274471 |
| 692 NA18972 | [2515685 chr22 | 22 | 43455661 | 43458419 | 2759    | 3   | -1.01266 0.099284  | 43455369 | 43455954 | 43457346 | 43459497 |
| 693 NA18972 | [2515685 chr22 | 22 | 43697364 | 43887783 | 190420  | 7   | 0.324659 0.062001  | 43597602 | 43700090 | 43887077 | 43888481 |
| 1 NA18860   | [2515685 chr1  | 1  | 897      | 71292    | 70396   | 113 | 0.596625 0.013813  | 1        | 1794     | 70533    | 72052    |
| 2 NA18860   | [2515685 chr1  | 1  | 401383   | 401535   | 153     | 2   | 0.746717 0.116055  | 401318   | 401448   | 401448   | 401622   |
| 3 NA18860   | [2515685 chr1  | 1  | 601038   | 612159   | 11122   | 8   | -1.180405 0.055375 | 587801   | 604315   | 610122   | 614196   |
| 4 NA18860   | [2515685 chr1  | 1  | 667876   | 668028   | 153     | 2   | 0.746717 0.116055  | 667789   | 667963   | 667963   | 668093   |

|            |               |   |           |           |        |    |           |          |           |           |           |          |
|------------|---------------|---|-----------|-----------|--------|----|-----------|----------|-----------|-----------|-----------|----------|
| 5 NA18860  | [2515685 chr1 | 1 | 7503292   | 7505532   | 2241   | 2  | 0.675881  | 0.119948 | 7502751   | 7503833   | 7505045   | 7506019  |
| 6 NA18860  | [2515685 chr1 | 1 | 10416438  | 10418311  | 1874   | 2  | -0.769037 | 0.097895 | 10415863  | 10417014  | 10417712  | 1041891  |
| 7 NA18860  | [2515685 chr1 | 1 | 12829124  | 12841476  | 12353  | 18 | 0.335849  | 0.034758 | 12828579  | 12829669  | 12841309  | 1284164  |
| 8 NA18860  | [2515685 chr1 | 1 | 12843376  | 12850337  | 6962   | 10 | 0.554241  | 0.047346 | 12843104  | 12843649  | 12850101  | 1285057  |
| 9 NA18860  | [2515685 chr1 | 1 | 12887630  | 12926542  | 38913  | 87 | 0.286461  | 0.014663 | 12887352  | 12887909  | 12926307  | 1292677  |
| 10 NA18860 | [2515685 chr1 | 1 | 12994062  | 13001855  | 7794   | 10 | 0.265265  | 0.047508 | 12993573  | 12994551  | 13001230  | 1300248  |
| 11 NA18860 | [2515685 chr1 | 1 | 13114053  | 13153574  | 39522  | 81 | 0.301749  | 0.015443 | 13113809  | 13114298  | 13153534  | 1315361  |
| 12 NA18860 | [2515685 chr1 | 1 | 13159940  | 13162706  | 2767   | 4  | 0.578069  | 0.060999 | 13159618  | 13160263  | 13162366  | 1316304  |
| 13 NA18860 | [2515685 chr1 | 1 | 13300967  | 13373969  | 73003  | 41 | 0.3271    | 0.020728 | 13300595  | 13301339  | 13373608  | 1337433  |
| 14 NA18860 | [2515685 chr1 | 1 | 13380737  | 13383503  | 2767   | 4  | 0.578069  | 0.060999 | 13380415  | 13381060  | 13383163  | 1338384  |
| 15 NA18860 | [2515685 chr1 | 1 | 13518505  | 13522174  | 3670   | 4  | -0.912442 | 0.084609 | 13517560  | 13519451  | 13521947  | 1352240  |
| 16 NA18860 | [2515685 chr1 | 1 | 16604440  | 16608915  | 4476   | 5  | 0.390927  | 0.064473 | 16604025  | 16604856  | 16608607  | 1660922  |
| 17 NA18860 | [2515685 chr1 | 1 | 16793085  | 16795473  | 2389   | 5  | -0.484467 | 0.066601 | 16792521  | 16793650  | 16795127  | 1679581  |
| 18 NA18860 | [2515685 chr1 | 1 | 16983252  | 17007421  | 24170  | 26 | -0.285349 | 0.0297   | 16982953  | 16983552  | 17006449  | 1700839  |
| 19 NA18860 | [2515685 chr1 | 1 | 25330950  | 25409968  | 79019  | 78 | 0.386489  | 0.016507 | 25330662  | 25331238  | 25409763  | 2541017  |
| 20 NA18860 | [2515685 chr1 | 1 | 25434181  | 25479956  | 45776  | 26 | 0.338286  | 0.028869 | 25433990  | 25434373  | 25476679  | 2548421  |
| 21 NA18860 | [2515685 chr1 | 1 | 72478372  | 72524180  | 45809  | 36 | -3.017495 | 0.047328 | 72478140  | 72478604  | 72523661  | 7252470  |
| 22 NA18860 | [2515685 chr1 | 1 | 86112825  | 86116608  | 3784   | 5  | -0.857154 | 0.073167 | 86112582  | 86113069  | 86116349  | 8611686  |
| 23 NA18860 | [2515685 chr1 | 1 | 89188117  | 89190762  | 2646   | 5  | 2.000593  | 0.094663 | 89187764  | 89188470  | 89190458  | 8919106  |
| 24 NA18860 | [2515685 chr1 | 1 | 100154289 | 100155903 | 1615   | 2  | 0.540717  | 0.095909 | 100153890 | 100154689 | 100155558 | 10015624 |
| 25 NA18860 | [2515685 chr1 | 1 | 103935016 | 103942222 | 7207   | 8  | 0.476811  | 0.052925 | 103934764 | 103935268 | 103942212 | 10394223 |
| 26 NA18860 | [2515685 chr1 | 1 | 105728161 | 105735462 | 7302   | 8  | -1.08238  | 0.06308  | 105727820 | 105732503 | 105734532 | 10573639 |
| 27 NA18860 | [2515685 chr1 | 1 | 105749326 | 105752175 | 2850   | 2  | -0.482353 | 0.096188 | 105749151 | 105749501 | 105750293 | 10575405 |
| 28 NA18860 | [2515685 chr1 | 1 | 108444641 | 108449550 | 4910   | 9  | 0.805464  | 0.051701 | 108443817 | 108445466 | 108449224 | 10844987 |
| 29 NA18860 | [2515685 chr1 | 1 | 108484830 | 108485270 | 441    | 2  | -0.53946  | 0.095983 | 108484660 | 108485001 | 108485002 | 10848553 |
| 30 NA18860 | [2515685 chr1 | 1 | 108718399 | 108718839 | 441    | 2  | -0.53946  | 0.095983 | 108718131 | 108718668 | 108718669 | 10871901 |
| 31 NA18860 | [2515685 chr1 | 1 | 109929748 | 109966604 | 36857  | 39 | 0.91644   | 0.025414 | 109929322 | 109930175 | 109966387 | 10996682 |
| 32 NA18860 | [2515685 chr1 | 1 | 112405902 | 112416691 | 10790  | 10 | 0.702703  | 0.051901 | 112405415 | 112406389 | 112416423 | 11241696 |
| 33 NA18860 | [2515685 chr1 | 1 | 116870606 | 116915240 | 44635  | 53 | 0.585455  | 0.02054  | 116869172 | 116872040 | 116914887 | 11691559 |
| 34 NA18860 | [2515685 chr1 | 1 | 141876697 | 141877606 | 910    | 2  | -0.513949 | 0.10233  | 141876675 | 141876720 | 141877195 | 14187801 |
| 35 NA18860 | [2515685 chr1 | 1 | 145819541 | 145839481 | 19941  | 22 | 0.486777  | 0.03245  | 145819262 | 145819821 | 145839093 | 14583986 |
| 36 NA18860 | [2515685 chr1 | 1 | 145855187 | 145859584 | 4398   | 2  | 0.773626  | 0.102276 | 145848112 | 145858464 | 145859395 | 14585977 |
| 37 NA18860 | [2515685 chr1 | 1 | 145922498 | 145976652 | 54155  | 58 | 0.48294   | 0.019518 | 145921149 | 145923848 | 145974769 | 14597853 |
| 38 NA18860 | [2515685 chr1 | 1 | 146091710 | 146164488 | 72779  | 25 | 0.322254  | 0.02853  | 146091319 | 146092102 | 146163705 | 14616527 |
| 39 NA18860 | [2515685 chr1 | 1 | 146430129 | 146431026 | 898    | 2  | -0.513948 | 0.10233  | 146429730 | 146430528 | 146431003 | 14643104 |
| 40 NA18860 | [2515685 chr1 | 1 | 149573040 | 149583431 | 10392  | 6  | 0.920857  | 0.069563 | 149572621 | 149573460 | 149582912 | 14958395 |
| 41 NA18860 | [2515685 chr1 | 1 | 158294538 | 158377436 | 82899  | 97 | -0.262308 | 0.014647 | 158294226 | 158294850 | 158377203 | 15837767 |
| 42 NA18860 | [2515685 chr1 | 1 | 159083853 | 159086136 | 2284   | 3  | 0.523051  | 0.089417 | 159083104 | 159084603 | 159085870 | 15908640 |
| 43 NA18860 | [2515685 chr1 | 1 | 171527310 | 171533429 | 6120   | 6  | -0.828927 | 0.065415 | 171526198 | 171528423 | 171533245 | 17153361 |
| 44 NA18860 | [2515685 chr1 | 1 | 186523038 | 186537395 | 14358  | 11 | -0.252342 | 0.04699  | 186522629 | 186523447 | 186537175 | 18653761 |
| 45 NA18860 | [2515685 chr1 | 1 | 192564626 | 192567023 | 2398   | 4  | -0.435104 | 0.085279 | 192564301 | 192564952 | 192566643 | 19256740 |
| 46 NA18860 | [2515685 chr1 | 1 | 193443495 | 193554182 | 110688 | 95 | 0.472013  | 0.015623 | 193443280 | 193443710 | 193553474 | 19355489 |
| 47 NA18860 | [2515685 chr1 | 1 | 193620474 | 193647181 | 26708  | 19 | 0.30257   | 0.033332 | 193620254 | 193620694 | 193646010 | 19364835 |
| 48 NA18860 | [2515685 chr1 | 1 | 204086494 | 204136836 | 50343  | 66 | 0.446614  | 0.016159 | 204085868 | 204087121 | 204136077 | 20413759 |
| 49 NA18860 | [2515685 chr1 | 1 | 204229515 | 204234080 | 4566   | 4  | -0.868111 | 0.076208 | 204228648 | 204230383 | 204233127 | 20423503 |
| 50 NA18860 | [2515685 chr1 | 1 | 218762650 | 218768272 | 5623   | 6  | 0.568807  | 0.062277 | 218762212 | 218763089 | 218767017 | 21876952 |
| 51 NA18860 | [2515685 chr1 | 1 | 234290697 | 234291988 | 1292   | 2  | 0.758501  | 0.119935 | 234290238 | 234291157 | 234291759 | 23429221 |
| 52 NA18860 | [2515685 chr1 | 1 | 236719047 | 236720968 | 1922   | 3  | -0.909161 | 0.087606 | 236718751 | 236719344 | 236720749 | 23672118 |
| 53 NA18860 | [2515685 chr1 | 1 | 243009520 | 243011368 | 1849   | 3  | -1.591134 | 0.102674 | 243008430 | 243010610 | 243011204 | 24301153 |
| 54 NA18860 | [2515685 chr1 | 1 | 244126940 | 244129440 | 2501   | 4  | 0.376621  | 0.072309 | 244126748 | 244127132 | 244129247 | 24412963 |
| 55 NA18860 | [2515685 chr1 | 1 | 244872415 | 244874098 | 1684   | 5  | -0.470522 | 0.072235 | 244872245 | 244872585 | 244873799 | 24487439 |
| 56 NA18860 | [2515685 chr1 | 1 | 244960293 | 244962187 | 1895   | 3  | 0.784621  | 0.097329 | 244959817 | 244960769 | 244961807 | 24496256 |
| 57 NA18860 | [2515685 chr1 | 1 | 245053742 | 245055036 | 1295   | 2  | -3.717895 | 0.289922 | 245053467 | 245054017 | 245054669 | 24505540 |
| 58 NA18860 | [2515685 chr1 | 1 | 245063969 | 245121920 | 57952  | 56 | -0.846344 | 0.020639 | 245063824 | 245064115 | 245121605 | 24512223 |
| 59 NA18860 | [2515685 chr1 | 1 | 245133999 | 245137702 | 3704   | 6  | 0.377981  | 0.061236 | 245133645 | 245134354 | 245137376 | 24513802 |

|             |               |   |           |           |        |     |           |          |           |           |           |           |
|-------------|---------------|---|-----------|-----------|--------|-----|-----------|----------|-----------|-----------|-----------|-----------|
| 60 NA18860  | [2515685 chr1 | 1 | 245195364 | 245200716 | 5353   | 6   | -3.538558 | 0.12644  | 245194714 | 245196015 | 245200082 | 245201351 |
| 61 NA18860  | [2515685 chr2 | 2 | 388500    | 390704    | 2205   | 6   | 0.345742  | 0.059963 | 387915    | 389086    | 390173    | 391236    |
| 62 NA18860  | [2515685 chr2 | 2 | 409864    | 411481    | 1618   | 12  | 0.266694  | 0.041562 | 409612    | 410116    | 411229    | 411733    |
| 63 NA18860  | [2515685 chr2 | 2 | 10318497  | 10320117  | 1621   | 2   | 0.561436  | 0.105562 | 10318085  | 10318910  | 10319715  | 10320511  |
| 64 NA18860  | [2515685 chr2 | 2 | 14629924  | 14635533  | 5610   | 3   | -0.424355 | 0.082608 | 14627422  | 14632427  | 14634482  | 14636581  |
| 65 NA18860  | [2515685 chr2 | 2 | 34606441  | 34644768  | 38328  | 39  | 0.824709  | 0.025373 | 34601818  | 34609397  | 34641812  | 34648391  |
| 66 NA18860  | [2515685 chr2 | 2 | 35896474  | 35905935  | 9462   | 3   | -0.874339 | 0.088206 | 35879425  | 35899430  | 35902979  | 35909821  |
| 67 NA18860  | [2515685 chr2 | 2 | 37869648  | 37911473  | 41826  | 43  | -0.455894 | 0.022579 | 37869077  | 37870220  | 37911214  | 37911731  |
| 68 NA18860  | [2515685 chr2 | 2 | 38044081  | 38045461  | 1381   | 2   | -0.499911 | 0.09704  | 38043690  | 38044473  | 38044990  | 38045931  |
| 69 NA18860  | [2515685 chr2 | 2 | 56563621  | 56567381  | 3761   | 2   | 3.570008  | 0.236138 | 56556559  | 56566577  | 56567035  | 56567721  |
| 70 NA18860  | [2515685 chr2 | 2 | 58863023  | 58865280  | 2258   | 2   | -0.711709 | 0.103084 | 58862748  | 58863299  | 58865052  | 58865501  |
| 71 NA18860  | [2515685 chr2 | 2 | 73925784  | 73945080  | 19297  | 28  | -0.303819 | 0.023118 | 73925556  | 73926013  | 73945012  | 73945141  |
| 72 NA18860  | [2515685 chr2 | 2 | 77098036  | 77099402  | 1367   | 2   | -0.827249 | 0.102747 | 77097693  | 77098379  | 77098843  | 77099961  |
| 73 NA18860  | [2515685 chr2 | 2 | 83210622  | 83211898  | 1277   | 2   | 0.634524  | 0.10942  | 83210303  | 83210941  | 83211349  | 83212441  |
| 74 NA18860  | [2515685 chr2 | 2 | 91101662  | 91107015  | 5354   | 2   | 0.552738  | 0.093487 | 91101386  | 91101938  | 91106590  | 91107441  |
| 75 NA18860  | [2515685 chr2 | 2 | 91337090  | 91347855  | 10766  | 16  | 0.470563  | 0.037484 | 91334271  | 91339909  | 91347601  | 91348111  |
| 76 NA18860  | [2515685 chr2 | 2 | 91383591  | 91393586  | 9996   | 22  | 0.438303  | 0.030284 | 91383374  | 91383809  | 91392231  | 91394941  |
| 77 NA18860  | [2515685 chr2 | 2 | 97184386  | 97189738  | 5353   | 2   | -0.773306 | 0.104895 | 97182781  | 97185992  | 97186782  | 97196721  |
| 78 NA18860  | [2515685 chr2 | 2 | 97231726  | 97268396  | 36671  | 30  | 0.253839  | 0.026813 | 97224590  | 97234682  | 97267890  | 97268901  |
| 79 NA18860  | [2515685 chr2 | 2 | 97613796  | 97614932  | 1137   | 2   | 1.271648  | 0.133206 | 97613553  | 97614040  | 97614467  | 97615391  |
| 80 NA18860  | [2515685 chr2 | 2 | 108313968 | 108314875 | 908    | 2   | 0.791365  | 0.112191 | 108313664 | 108314272 | 108314680 | 108315071 |
| 81 NA18860  | [2515685 chr2 | 2 | 114047737 | 114078067 | 30331  | 61  | 0.457346  | 0.018393 | 114046206 | 114049268 | 114075312 | 114080821 |
| 82 NA18860  | [2515685 chr2 | 2 | 126159437 | 126168349 | 8913   | 3   | -0.888808 | 0.088771 | 126158494 | 126160381 | 126168048 | 126168651 |
| 83 NA18860  | [2515685 chr2 | 2 | 129229413 | 129230774 | 1362   | 2   | -1.391559 | 0.132182 | 129229234 | 129229593 | 129230356 | 129231191 |
| 84 NA18860  | [2515685 chr2 | 2 | 130410671 | 130412325 | 1655   | 2   | -0.647145 | 0.108028 | 130410236 | 130411106 | 130412086 | 130412561 |
| 85 NA18860  | [2515685 chr2 | 2 | 130420955 | 130444724 | 23770  | 20  | -0.456837 | 0.032944 | 130420630 | 130421281 | 130422767 | 130446681 |
| 86 NA18860  | [2515685 chr2 | 2 | 130454948 | 130464040 | 9093   | 13  | -0.43713  | 0.042518 | 130454772 | 130455124 | 130463748 | 130464331 |
| 87 NA18860  | [2515685 chr2 | 2 | 130498267 | 130499350 | 1084   | 2   | -0.746905 | 0.105262 | 130497934 | 130498600 | 130499176 | 130499521 |
| 88 NA18860  | [2515685 chr2 | 2 | 130551722 | 130554379 | 2658   | 3   | -0.795748 | 0.085926 | 130551682 | 130551762 | 130554379 | 130554381 |
| 89 NA18860  | [2515685 chr2 | 2 | 130885569 | 130895798 | 10230  | 17  | -0.345919 | 0.034521 | 130885118 | 130886020 | 130893881 | 130897711 |
| 90 NA18860  | [2515685 chr2 | 2 | 130942733 | 130944156 | 1424   | 4   | -0.56739  | 0.070621 | 130942534 | 130942933 | 130943885 | 130944421 |
| 91 NA18860  | [2515685 chr2 | 2 | 130970279 | 130975546 | 5268   | 10  | -0.380726 | 0.044446 | 130969160 | 130971399 | 130975285 | 130975801 |
| 92 NA18860  | [2515685 chr2 | 2 | 131243197 | 131244619 | 1423   | 4   | -0.56739  | 0.070621 | 131242926 | 131243468 | 131244412 | 131244811 |
| 93 NA18860  | [2515685 chr2 | 2 | 131765078 | 131783622 | 18545  | 28  | -0.484887 | 0.027664 | 131749458 | 131768034 | 131783274 | 131783971 |
| 94 NA18860  | [2515685 chr2 | 2 | 131810915 | 131822538 | 11624  | 27  | -0.374307 | 0.028597 | 131810493 | 131811338 | 131821935 | 131823141 |
| 95 NA18860  | [2515685 chr2 | 2 | 131849646 | 131852310 | 2665   | 3   | -0.795747 | 0.085926 | 131849646 | 131849647 | 131852270 | 131852351 |
| 96 NA18860  | [2515685 chr2 | 2 | 131897483 | 131905614 | 8132   | 12  | -0.47232  | 0.042721 | 131895593 | 131899373 | 131904951 | 131906271 |
| 97 NA18860  | [2515685 chr2 | 2 | 131919064 | 131919748 | 685    | 2   | -0.713723 | 0.110264 | 131918907 | 131919221 | 131919257 | 131920241 |
| 98 NA18860  | [2515685 chr2 | 2 | 131922384 | 131926691 | 4308   | 7   | -0.534927 | 0.057004 | 131922010 | 131922759 | 131926394 | 131926981 |
| 99 NA18860  | [2515685 chr2 | 2 | 131947114 | 131953962 | 6849   | 10  | -0.459599 | 0.0478   | 131946771 | 131947457 | 131953571 | 131954351 |
| 100 NA18860 | [2515685 chr2 | 2 | 132142907 | 132329674 | 186768 | 216 | -0.352243 | 0.009633 | 132141027 | 132144787 | 132329400 | 132329941 |
| 101 NA18860 | [2515685 chr2 | 2 | 132334309 | 132353045 | 18737  | 19  | -0.352243 | 0.009633 | 132333497 | 132335122 | 132352836 | 132353251 |
| 102 NA18860 | [2515685 chr2 | 2 | 133114116 | 133142381 | 28266  | 22  | 0.512535  | 0.031927 | 133113550 | 133114682 | 133142082 | 133142681 |
| 103 NA18860 | [2515685 chr2 | 2 | 146694142 | 146710744 | 16603  | 17  | 0.896934  | 0.040775 | 146688620 | 146697098 | 146710557 | 146710931 |
| 104 NA18860 | [2515685 chr2 | 2 | 153495547 | 153499409 | 3863   | 2   | 0.68683   | 0.117765 | 153484545 | 153498503 | 153498846 | 153499971 |
| 105 NA18860 | [2515685 chr2 | 2 | 195804965 | 195809805 | 4841   | 5   | -0.820132 | 0.072555 | 195803577 | 195806354 | 195809355 | 195810251 |
| 106 NA18860 | [2515685 chr2 | 2 | 205441386 | 205443342 | 1957   | 2   | 0.721129  | 0.096821 | 205440952 | 205441821 | 205443078 | 205443601 |
| 107 NA18860 | [2515685 chr2 | 2 | 208176479 | 208184457 | 7979   | 7   | 0.885958  | 0.061007 | 208176093 | 208176865 | 208183930 | 208184981 |
| 108 NA18860 | [2515685 chr2 | 2 | 228717927 | 228730812 | 12886  | 3   | -0.708513 | 0.080723 | 228715615 | 228720239 | 228730139 | 228731481 |
| 109 NA18860 | [2515685 chr2 | 2 | 242664580 | 242668683 | 4104   | 10  | 0.426241  | 0.039498 | 242664284 | 242664877 | 242668532 | 242668831 |
| 110 NA18860 | [2515685 chr3 | 3 | 149944    | 154904    | 4961   | 7   | -0.444628 | 0.058428 | 148712    | 151176    | 154511    | 1552971   |
| 111 NA18860 | [2515685 chr3 | 3 | 204650    | 209394    | 4745   | 4   | 0.817509  | 0.075498 | 202918    | 206383    | 209009    | 2097751   |
| 112 NA18860 | [2515685 chr3 | 3 | 1757211   | 1765709   | 8499   | 2   | 0.822532  | 0.117571 | 1756096   | 1758327   | 1762058   | 1797301   |
| 113 NA18860 | [2515685 chr3 | 3 | 6192973   | 6215560   | 22588  | 16  | -0.854874 | 0.038321 | 6191571   | 6194375   | 6215263   | 6215851   |
| 114 NA18860 | [2515685 chr3 | 3 | 42350188  | 42351248  | 1061   | 2   | 0.567446  | 0.101606 | 42349839  | 42350537  | 42351007  | 42351491  |

|             |               |   |           |           |        |    |           |          |           |           |           |           |
|-------------|---------------|---|-----------|-----------|--------|----|-----------|----------|-----------|-----------|-----------|-----------|
| 115 NA18860 | [2515685 chr3 | 3 | 46770617  | 46826525  | 55909  | 14 | -0.72401  | 0.039793 | 46770172  | 46771063  | 46826330  | 46826272  |
| 116 NA18860 | [2515685 chr3 | 3 | 47819453  | 47820469  | 1017   | 3  | 0.458182  | 0.079883 | 47819200  | 47819707  | 47820356  | 4782058;  |
| 117 NA18860 | [2515685 chr3 | 3 | 68821474  | 68830847  | 9374   | 17 | -2.411206 | 0.061007 | 68818894  | 68824055  | 68830417  | 6883127;  |
| 118 NA18860 | [2515685 chr3 | 3 | 105760262 | 105762355 | 2094   | 2  | -1.020507 | 0.123841 | 105759634 | 105760890 | 105761424 | 10576328  |
| 119 NA18860 | [2515685 chr3 | 3 | 127155656 | 127158873 | 3218   | 5  | -0.53187  | 0.066546 | 127155390 | 127155923 | 127158237 | 12715950  |
| 120 NA18860 | [2515685 chr3 | 3 | 131204575 | 131207291 | 2717   | 5  | 0.34973   | 0.062348 | 131204147 | 131205003 | 131206953 | 13120762  |
| 121 NA18860 | [2515685 chr3 | 3 | 141750174 | 141753455 | 3282   | 5  | -0.723212 | 0.076318 | 141749720 | 141750628 | 141753182 | 14175372  |
| 122 NA18860 | [2515685 chr3 | 3 | 163978078 | 163979650 | 1573   | 4  | -0.355782 | 0.067213 | 163977866 | 163978291 | 163979488 | 16397981. |
| 123 NA18860 | [2515685 chr3 | 3 | 176561952 | 176567506 | 5555   | 5  | -0.929262 | 0.070376 | 176560250 | 176563654 | 176565991 | 17656902  |
| 124 NA18860 | [2515685 chr3 | 3 | 192547312 | 192554331 | 7020   | 10 | 0.887587  | 0.052054 | 192546950 | 192547674 | 192554127 | 19255453  |
| 125 NA18860 | [2515685 chr3 | 3 | 194883325 | 194885627 | 2303   | 2  | -0.569909 | 0.111018 | 194881986 | 194884665 | 194885401 | 19488585  |
| 126 NA18860 | [2515685 chr3 | 3 | 196041653 | 196050096 | 8444   | 9  | -0.931677 | 0.053877 | 196041317 | 196041990 | 196049206 | 19605098  |
| 127 NA18860 | [2515685 chr3 | 3 | 196991681 | 197002965 | 11285  | 19 | 0.646811  | 0.035447 | 196991423 | 196991939 | 197002044 | 19700388  |
| 128 NA18860 | [2515685 chr3 | 3 | 198422794 | 198427408 | 4615   | 2  | 1.039762  | 0.124285 | 198422381 | 198423207 | 198423959 | 19843085  |
| 129 NA18860 | [2515685 chr3 | 3 | 198674426 | 198675470 | 1045   | 6  | -1.426192 | 0.062439 | 198674161 | 198674692 | 198674903 | 19867603. |
| 130 NA18860 | [2515685 chr3 | 3 | 199313925 | 199321063 | 7139   | 15 | 1.202352  | 0.036199 | 199313515 | 199314336 | 199320844 | 19932128  |
| 131 NA18860 | [2515685 chr4 | 4 | 3079      | 59751     | 56673  | 60 | -0.254659 | 0.019034 | 5         | 6152      | 58184     | 61319     |
| 132 NA18860 | [2515685 chr4 | 4 | 3714193   | 3715251   | 1059   | 2  | 1.063724  | 0.124909 | 3713862   | 3714524   | 3714881   | 3715627   |
| 133 NA18860 | [2515685 chr4 | 4 | 6742001   | 6745059   | 3059   | 3  | -0.772482 | 0.087744 | 6741348   | 6742655   | 6744125   | 6745994   |
| 134 NA18860 | [2515685 chr4 | 4 | 8740317   | 8756949   | 16633  | 25 | 0.783307  | 0.025202 | 8740049   | 8740586   | 8756813   | 8757086   |
| 135 NA18860 | [2515685 chr4 | 4 | 8998170   | 9046719   | 48550  | 87 | 0.985536  | 0.013461 | 8850774   | 9001243   | 9046129   | 9047305   |
| 136 NA18860 | [2515685 chr4 | 4 | 9147328   | 9155912   | 8585   | 4  | 0.382728  | 0.069956 | 9147001   | 9147656   | 9152839   | 9161176   |
| 137 NA18860 | [2515685 chr4 | 4 | 9299462   | 9308037   | 8576   | 6  | -1.524983 | 0.083729 | 9295439   | 9302535   | 9306599   | 9309476   |
| 138 NA18860 | [2515685 chr4 | 4 | 9506018   | 9508773   | 2756   | 2  | 0.444919  | 0.088936 | 9505058   | 9506979   | 9508507   | 9509093   |
| 139 NA18860 | [2515685 chr4 | 4 | 9812346   | 9813108   | 763    | 33 | 2.315367  | 0.02535  | 9812284   | 9812408   | 9812952   | 9813265   |
| 140 NA18860 | [2515685 chr4 | 4 | 9887220   | 9911397   | 24178  | 31 | 3.019861  | 0.051439 | 9886886   | 9887555   | 9910388   | 9912407   |
| 141 NA18860 | [2515685 chr4 | 4 | 11342986  | 11347570  | 4585   | 6  | -0.9372   | 0.067392 | 11342619  | 11343353  | 11346471  | 11348665  |
| 142 NA18860 | [2515685 chr4 | 4 | 25178042  | 25182590  | 4549   | 5  | -1.002411 | 0.067162 | 25177648  | 25178437  | 25182174  | 25183007  |
| 143 NA18860 | [2515685 chr4 | 4 | 34174420  | 34180729  | 6310   | 10 | -0.33429  | 0.048493 | 34174211  | 34174630  | 34180396  | 34181067  |
| 144 NA18860 | [2515685 chr4 | 4 | 49080370  | 49080863  | 494    | 2  | -0.86169  | 0.10498  | 49079937  | 49080803  | 49080804  | 49080927  |
| 145 NA18860 | [2515685 chr4 | 4 | 49400316  | 49400601  | 286    | 3  | -0.760928 | 0.085001 | 49400246  | 49400386  | 49400516  | 49400687  |
| 146 NA18860 | [2515685 chr4 | 4 | 57977579  | 57979866  | 2288   | 2  | -0.574621 | 0.094328 | 57977319  | 57977839  | 57979557  | 57980177  |
| 147 NA18860 | [2515685 chr4 | 4 | 66475262  | 66478728  | 3467   | 4  | -0.37034  | 0.073178 | 66474966  | 66475558  | 66478106  | 66479357  |
| 148 NA18860 | [2515685 chr4 | 4 | 69202095  | 69319814  | 117720 | 71 | 1.172126  | 0.024654 | 69201955  | 69202236  | 69319569  | 69320057  |
| 149 NA18860 | [2515685 chr4 | 4 | 69330953  | 69332978  | 2026   | 3  | 0.570785  | 0.070436 | 69330112  | 69331795  | 69332841  | 69333117  |
| 150 NA18860 | [2515685 chr4 | 4 | 69683114  | 69685000  | 1887   | 3  | 0.570785  | 0.070436 | 69682412  | 69683817  | 69684863  | 69685137  |
| 151 NA18860 | [2515685 chr4 | 4 | 69713351  | 69714268  | 918    | 2  | 0.641265  | 0.095723 | 69713102  | 69713600  | 69714004  | 69714537  |
| 152 NA18860 | [2515685 chr4 | 4 | 87333407  | 87337560  | 4154   | 4  | -1.07401  | 0.083133 | 87333057  | 87333758  | 87337055  | 87338067  |
| 153 NA18860 | [2515685 chr4 | 4 | 92289323  | 92292975  | 3653   | 2  | 0.679801  | 0.119925 | 92199954  | 92292396  | 92292781  | 92293177  |
| 154 NA18860 | [2515685 chr4 | 4 | 92343585  | 92344675  | 1091   | 2  | -0.631052 | 0.124952 | 92343246  | 92343924  | 92344415  | 92344937  |
| 155 NA18860 | [2515685 chr4 | 4 | 115534203 | 115541546 | 7344   | 9  | 0.877895  | 0.056035 | 115530015 | 115537276 | 115539984 | 11554310  |
| 156 NA18860 | [2515685 chr4 | 4 | 115865203 | 115869488 | 4286   | 3  | -1.004368 | 0.104199 | 115864913 | 115865494 | 115866415 | 11587556  |
| 157 NA18860 | [2515685 chr4 | 4 | 116524394 | 116534652 | 10259  | 12 | -1.083167 | 0.046452 | 116523990 | 116524798 | 116534384 | 11653492  |
| 158 NA18860 | [2515685 chr4 | 4 | 117924345 | 117928199 | 3855   | 4  | -0.361006 | 0.069964 | 117923097 | 117925593 | 117927699 | 11792870  |
| 159 NA18860 | [2515685 chr4 | 4 | 125304905 | 125305983 | 1079   | 2  | 0.545522  | 0.104181 | 125304587 | 125305223 | 125305732 | 12530623  |
| 160 NA18860 | [2515685 chr4 | 4 | 133002078 | 133043320 | 41243  | 22 | 0.358181  | 0.026702 | 133001890 | 133002267 | 133042031 | 13304460  |
| 161 NA18860 | [2515685 chr4 | 4 | 133108885 | 133114636 | 5752   | 9  | -0.263093 | 0.049733 | 133108710 | 133109061 | 133114207 | 13311506  |
| 162 NA18860 | [2515685 chr4 | 4 | 133536185 | 133540723 | 4539   | 3  | -0.942053 | 0.104263 | 133531398 | 133539258 | 133540462 | 13354098  |
| 163 NA18860 | [2515685 chr4 | 4 | 138515732 | 138523407 | 7676   | 8  | -0.26064  | 0.050026 | 138513259 | 138518206 | 138522778 | 13852403  |
| 164 NA18860 | [2515685 chr4 | 4 | 138537751 | 138549906 | 12156  | 14 | 0.868467  | 0.045071 | 138537443 | 138538059 | 138547414 | 13855239  |
| 165 NA18860 | [2515685 chr4 | 4 | 142582827 | 142584846 | 2020   | 2  | -0.89089  | 0.131663 | 142582395 | 142583259 | 142584633 | 14258506  |
| 166 NA18860 | [2515685 chr4 | 4 | 142588136 | 142590500 | 2365   | 4  | -2.691265 | 0.124772 | 142587774 | 142588498 | 142590303 | 14259069  |
| 167 NA18860 | [2515685 chr4 | 4 | 144151802 | 144155859 | 4058   | 5  | -1.035915 | 0.076719 | 144151763 | 144151841 | 144152786 | 14421396  |
| 168 NA18860 | [2515685 chr4 | 4 | 152236490 | 152243015 | 6526   | 8  | -0.808001 | 0.056288 | 152231776 | 152239563 | 152241354 | 15224467  |
| 169 NA18860 | [2515685 chr4 | 4 | 158680453 | 158684185 | 3733   | 2  | -0.586544 | 0.102895 | 158679988 | 158680919 | 158681391 | 15868697  |

|             |               |   |           |           |        |     |           |          |           |           |           |          |
|-------------|---------------|---|-----------|-----------|--------|-----|-----------|----------|-----------|-----------|-----------|----------|
| 170 NA18860 | [2515685 chr4 | 4 | 162806038 | 162809269 | 3232   | 3   | 0.660517  | 0.08594  | 162804872 | 162807204 | 162808734 | 16280980 |
| 171 NA18860 | [2515685 chr4 | 4 | 166220906 | 166241047 | 20142  | 17  | 0.479235  | 0.036572 | 166219788 | 166222025 | 166238435 | 16624365 |
| 172 NA18860 | [2515685 chr4 | 4 | 169183401 | 169368370 | 184970 | 162 | 0.828235  | 0.012403 | 169182712 | 169184090 | 169366713 | 16937002 |
| 173 NA18860 | [2515685 chr4 | 4 | 173363594 | 173367718 | 4125   | 6   | -0.933937 | 0.064574 | 173362583 | 173364606 | 173367283 | 17336815 |
| 174 NA18860 | [2515685 chr4 | 4 | 178775272 | 178781232 | 5961   | 7   | -0.298597 | 0.058741 | 178774723 | 178775822 | 178780564 | 17878190 |
| 175 NA18860 | [2515685 chr4 | 4 | 181510330 | 181513372 | 3043   | 4   | -0.819255 | 0.086003 | 181509772 | 181510889 | 181513067 | 18151367 |
| 176 NA18860 | [2515685 chr4 | 4 | 183925776 | 183929414 | 3639   | 2   | -0.534043 | 0.099316 | 183924911 | 183926642 | 183929061 | 18392976 |
| 177 NA18860 | [2515685 chr4 | 4 | 185535274 | 185545272 | 9999   | 9   | 1.027477  | 0.053195 | 185534955 | 185535593 | 185543276 | 18554726 |
| 178 NA18860 | [2515685 chr4 | 4 | 186816666 | 186819359 | 2694   | 4   | 4.351203  | 0.188027 | 186816420 | 186816912 | 186819049 | 18681967 |
| 179 NA18860 | [2515685 chr4 | 4 | 187728494 | 187732907 | 4414   | 15  | 2.531194  | 0.059016 | 187728193 | 187728795 | 187732541 | 18773327 |
| 180 NA18860 | [2515685 chr4 | 4 | 188255523 | 188269680 | 14158  | 235 | 1.471576  | 0.01031  | 188255215 | 188255831 | 188269403 | 18826995 |
| 181 NA18860 | [2515685 chr4 | 4 | 189799455 | 189806541 | 7087   | 10  | -0.353694 | 0.044771 | 189799180 | 189799730 | 189806018 | 18980706 |
| 182 NA18860 | [2515685 chr4 | 4 | 190528602 | 190533163 | 4562   | 21  | -3.176109 | 0.05247  | 190528058 | 190529146 | 190531664 | 19053466 |
| 183 NA18860 | [2515685 chr4 | 4 | 190941429 | 190942794 | 1366   | 3   | 0.559321  | 0.076751 | 190941038 | 190941820 | 190942354 | 19094323 |
| 184 NA18860 | [2515685 chr4 | 4 | 191142404 | 191143596 | 1193   | 3   | -0.796917 | 0.087223 | 191142135 | 191142673 | 191143215 | 19114397 |
| 185 NA18860 | [2515685 chr5 | 5 | 261631    | 263283    | 1653   | 9   | 0.592525  | 0.053629 | 261032    | 262230    | 262766    | 263801   |
| 186 NA18860 | [2515685 chr5 | 5 | 520743    | 523903    | 3161   | 9   | 0.344423  | 0.050306 | 520428    | 521059    | 523590    | 524217   |
| 187 NA18860 | [2515685 chr5 | 5 | 682536    | 686746    | 4211   | 16  | -0.255946 | 0.033843 | 682483    | 682590    | 686331    | 687162   |
| 188 NA18860 | [2515685 chr5 | 5 | 731032    | 902652    | 171621 | 156 | 0.603349  | 0.011707 | 730880    | 731185    | 902127    | 903178   |
| 189 NA18860 | [2515685 chr5 | 5 | 931723    | 935658    | 3936   | 4   | 0.472584  | 0.066261 | 931199    | 932248    | 934564    | 936753   |
| 190 NA18860 | [2515685 chr5 | 5 | 948969    | 953016    | 4048   | 13  | -0.548347 | 0.034418 | 948182    | 949756    | 952851    | 953182   |
| 191 NA18860 | [2515685 chr5 | 5 | 1074447   | 1131159   | 56713  | 112 | 0.328138  | 0.012971 | 1074186   | 1074709   | 1130559   | 1131760  |
| 192 NA18860 | [2515685 chr5 | 5 | 3711017   | 3713468   | 2452   | 3   | -0.891989 | 0.090882 | 3710011   | 3712024   | 3713223   | 3713713  |
| 193 NA18860 | [2515685 chr5 | 5 | 5142059   | 5148385   | 6327   | 6   | -0.314866 | 0.060453 | 5141517   | 5142602   | 5148012   | 5148753  |
| 194 NA18860 | [2515685 chr5 | 5 | 17515667  | 17525104  | 9438   | 7   | -0.837214 | 0.059542 | 17510191  | 17518865  | 17523994  | 1752621  |
| 195 NA18860 | [2515685 chr5 | 5 | 17550023  | 17552132  | 2110   | 4   | 0.454929  | 0.064678 | 17549646  | 17550401  | 17551804  | 17552460 |
| 196 NA18860 | [2515685 chr5 | 5 | 17570617  | 17643104  | 72488  | 331 | 0.557799  | 0.007231 | 17570551  | 17570684  | 17642455  | 1764375  |
| 197 NA18860 | [2515685 chr5 | 5 | 17663728  | 17667407  | 3680   | 8   | 0.511454  | 0.048173 | 17663473  | 17663984  | 17667174  | 1766764  |
| 198 NA18860 | [2515685 chr5 | 5 | 19410747  | 19412172  | 1426   | 3   | 0.777066  | 0.086286 | 19410189  | 19411305  | 19411980  | 1941236  |
| 199 NA18860 | [2515685 chr5 | 5 | 21483394  | 21488147  | 4754   | 4   | -0.827356 | 0.07319  | 21480817  | 21485972  | 21487855  | 2148843  |
| 200 NA18860 | [2515685 chr5 | 5 | 21889815  | 21891927  | 2113   | 3   | -0.456855 | 0.087679 | 21889447  | 21890183  | 21891637  | 2189221  |
| 201 NA18860 | [2515685 chr5 | 5 | 26831997  | 26835654  | 3658   | 3   | -3.302919 | 0.167011 | 26829858  | 26834136  | 26835377  | 2683593  |
| 202 NA18860 | [2515685 chr5 | 5 | 26836459  | 26837938  | 1480   | 2   | -2.214469 | 0.240086 | 26835932  | 26836987  | 26837469  | 2683840  |
| 203 NA18860 | [2515685 chr5 | 5 | 55701025  | 55705931  | 4907   | 3   | -0.515256 | 0.0974   | 55700864  | 55701186  | 55705409  | 5570645  |
| 204 NA18860 | [2515685 chr5 | 5 | 68865200  | 68948510  | 83311  | 153 | 0.55749   | 0.011644 | 68864770  | 68865630  | 68948219  | 6894880  |
| 205 NA18860 | [2515685 chr5 | 5 | 69348066  | 69404835  | 56770  | 60  | 0.308676  | 0.016575 | 69347865  | 69348268  | 69404157  | 6940551  |
| 206 NA18860 | [2515685 chr5 | 5 | 69404835  | 69433946  | 29112  | 26  | 0.646463  | 0.025081 | 69404157  | 69405513  | 69433170  | 6943472  |
| 207 NA18860 | [2515685 chr5 | 5 | 69463749  | 69464161  | 413    | 2   | -0.690923 | 0.09937  | 69463497  | 69464001  | 69464004  | 6946431  |
| 208 NA18860 | [2515685 chr5 | 5 | 69497288  | 69497994  | 707    | 2   | 0.611314  | 0.102118 | 69496836  | 69497740  | 69497792  | 6949819  |
| 209 NA18860 | [2515685 chr5 | 5 | 69741138  | 69803645  | 62508  | 102 | 0.496636  | 0.013843 | 69740930  | 69741346  | 69803354  | 6980393  |
| 210 NA18860 | [2515685 chr5 | 5 | 69944823  | 69956688  | 11866  | 22  | 0.270504  | 0.027225 | 69944815  | 69944832  | 69956166  | 6995721  |
| 211 NA18860 | [2515685 chr5 | 5 | 70233016  | 70340791  | 107776 | 120 | 0.454381  | 0.008396 | 70232663  | 70233369  | 70340046  | 7034153  |
| 212 NA18860 | [2515685 chr5 | 5 | 70346521  | 70431922  | 85402  | 140 | 0.454381  | 0.008396 | 70346074  | 70346969  | 70431095  | 7043274  |
| 213 NA18860 | [2515685 chr5 | 5 | 70440940  | 70447838  | 6899   | 15  | 0.298665  | 0.035243 | 70440743  | 70441137  | 70446675  | 7044900  |
| 214 NA18860 | [2515685 chr5 | 5 | 70464063  | 70464475  | 413    | 2   | -0.690923 | 0.09937  | 70463811  | 70464315  | 70464318  | 7046463  |
| 215 NA18860 | [2515685 chr5 | 5 | 79992681  | 79995388  | 2708   | 3   | 0.47825   | 0.093499 | 79992202  | 79993161  | 79995134  | 7999564  |
| 216 NA18860 | [2515685 chr5 | 5 | 81459207  | 81466061  | 6855   | 2   | -1.570084 | 0.127064 | 81455614  | 81462405  | 81462863  | 8147028  |
| 217 NA18860 | [2515685 chr5 | 5 | 97154831  | 97156874  | 2044   | 2   | -0.726705 | 0.12366  | 97154663  | 97154999  | 97155457  | 9715829  |
| 218 NA18860 | [2515685 chr5 | 5 | 99409393  | 99419037  | 9645   | 13  | -0.498105 | 0.041625 | 99408997  | 99409789  | 99418328  | 9941974  |
| 219 NA18860 | [2515685 chr5 | 5 | 100662339 | 100669876 | 7538   | 11  | -0.260103 | 0.046184 | 100662197 | 100662482 | 100669370 | 10067038 |
| 220 NA18860 | [2515685 chr5 | 5 | 115547704 | 115551505 | 3802   | 7   | -0.296243 | 0.057374 | 115547417 | 115547991 | 115551147 | 11555186 |
| 221 NA18860 | [2515685 chr5 | 5 | 115638655 | 115644677 | 6023   | 9   | -0.330802 | 0.053218 | 115637817 | 115639494 | 115644437 | 11564491 |
| 222 NA18860 | [2515685 chr5 | 5 | 122649189 | 122651412 | 2224   | 3   | 0.611934  | 0.089939 | 122648933 | 122649446 | 122650032 | 12265279 |
| 223 NA18860 | [2515685 chr5 | 5 | 137835848 | 137842722 | 6875   | 5   | 0.880305  | 0.073699 | 137835611 | 137836085 | 137842135 | 13784331 |
| 224 NA18860 | [2515685 chr5 | 5 | 140203081 | 140218928 | 15848  | 19  | 2.333614  | 0.056828 | 140202344 | 140203819 | 140218508 | 14021934 |

|             |               |   |           |           |        |     |           |          |           |           |           |          |
|-------------|---------------|---|-----------|-----------|--------|-----|-----------|----------|-----------|-----------|-----------|----------|
| 225 NA18860 | [2515685 chr5 | 5 | 150157909 | 150161837 | 3929   | 6   | -0.471857 | 0.028905 | 150157286 | 150158532 | 150161621 | 15016205 |
| 226 NA18860 | [2515685 chr5 | 5 | 150183322 | 150203801 | 20480  | 11  | -0.471857 | 0.028905 | 150181427 | 150185218 | 150203451 | 15020415 |
| 227 NA18860 | [2515685 chr5 | 5 | 155408303 | 155424017 | 15715  | 11  | -0.950962 | 0.051256 | 155405622 | 155410984 | 155420819 | 15542761 |
| 228 NA18860 | [2515685 chr5 | 5 | 165338998 | 165345132 | 6135   | 2   | -0.501353 | 0.097977 | 165338688 | 165339308 | 165341934 | 16535228 |
| 229 NA18860 | [2515685 chr5 | 5 | 178875137 | 178876641 | 1505   | 2   | 0.680517  | 0.096594 | 178874878 | 178875396 | 178875938 | 17887734 |
| 230 NA18860 | [2515685 chr5 | 5 | 180308895 | 180363417 | 54523  | 54  | 0.661546  | 0.021027 | 180308688 | 180309103 | 180363120 | 18036371 |
| 231 NA18860 | [2515685 chr6 | 6 | 3163      | 18689     | 15527  | 4   | 0.64865   | 0.068966 | 1         | 6325      | 15669     | 21709    |
| 232 NA18860 | [2515685 chr6 | 6 | 57835     | 57987     | 153    | 2   | 0.746719  | 0.116056 | 57748     | 57922     | 57922     | 58052    |
| 233 NA18860 | [2515685 chr6 | 6 | 142969    | 144646    | 1678   | 2   | -0.460427 | 0.089198 | 142286    | 143653    | 144145    | 145147   |
| 234 NA18860 | [2515685 chr6 | 6 | 201167    | 327656    | 126490 | 130 | 0.346942  | 0.01283  | 200920    | 201415    | 326993    | 328320   |
| 235 NA18860 | [2515685 chr6 | 6 | 26827749  | 26890332  | 62584  | 148 | 0.262976  | 0.012071 | 26827510  | 26827989  | 26890093  | 2689057  |
| 236 NA18860 | [2515685 chr6 | 6 | 29954251  | 30038916  | 84666  | 75  | 0.432271  | 0.014644 | 29950833  | 29957670  | 30036708  | 3004112  |
| 237 NA18860 | [2515685 chr6 | 6 | 30051460  | 30064799  | 13340  | 22  | 0.432271  | 0.014644 | 30051232  | 30051688  | 30064536  | 3006506  |
| 238 NA18860 | [2515685 chr6 | 6 | 31317024  | 31318467  | 1444   | 2   | 0.570703  | 0.106701 | 31316572  | 31317476  | 31318197  | 3131873  |
| 239 NA18860 | [2515685 chr6 | 6 | 31346895  | 31348122  | 1228   | 2   | 0.507711  | 0.09429  | 31346599  | 31347191  | 31347941  | 3134830  |
| 240 NA18860 | [2515685 chr6 | 6 | 32118076  | 32118799  | 724    | 2   | 0.815108  | 0.108811 | 32117905  | 32118247  | 32118580  | 3211901  |
| 241 NA18860 | [2515685 chr6 | 6 | 32539488  | 32557802  | 18315  | 16  | -0.269092 | 0.037235 | 32539084  | 32539892  | 32557647  | 3255795  |
| 242 NA18860 | [2515685 chr6 | 6 | 32557802  | 32558865  | 1064   | 2   | 0.872342  | 0.118737 | 32557647  | 32557958  | 32558698  | 3255903  |
| 243 NA18860 | [2515685 chr6 | 6 | 32586862  | 32588830  | 1969   | 3   | -0.744458 | 0.116576 | 32586127  | 32587597  | 32588323  | 3258933  |
| 244 NA18860 | [2515685 chr6 | 6 | 32589957  | 32591649  | 1693   | 3   | -2.089412 | 0.130206 | 32589338  | 32590576  | 32591403  | 3259189  |
| 245 NA18860 | [2515685 chr6 | 6 | 32600110  | 32628234  | 28125  | 18  | -0.774532 | 0.038375 | 32599921  | 32600300  | 32627886  | 3262858  |
| 246 NA18860 | [2515685 chr6 | 6 | 32630637  | 32681799  | 51163  | 49  | 0.389811  | 0.024678 | 32630364  | 32630911  | 32680956  | 3268264  |
| 247 NA18860 | [2515685 chr6 | 6 | 32702716  | 32705737  | 3022   | 3   | -1.560866 | 0.091288 | 32702285  | 32703148  | 32704019  | 3270745  |
| 248 NA18860 | [2515685 chr6 | 6 | 32712337  | 32732004  | 19668  | 17  | 0.532342  | 0.027841 | 32712193  | 32712482  | 32731216  | 3273279  |
| 249 NA18860 | [2515685 chr6 | 6 | 32735984  | 32744343  | 8360   | 14  | 0.532342  | 0.027841 | 32735718  | 32736251  | 32744136  | 3274455  |
| 250 NA18860 | [2515685 chr6 | 6 | 34723451  | 34730426  | 6976   | 9   | -0.258081 | 0.050282 | 34723059  | 34723843  | 34730178  | 3473067  |
| 251 NA18860 | [2515685 chr6 | 6 | 35862833  | 35874426  | 11594  | 13  | 0.530674  | 0.040906 | 35862530  | 35863136  | 35873957  | 3587489  |
| 252 NA18860 | [2515685 chr6 | 6 | 54036900  | 54042384  | 5485   | 5   | 4.337799  | 0.157317 | 54036573  | 54037227  | 54041771  | 5404299  |
| 253 NA18860 | [2515685 chr6 | 6 | 63665568  | 63667880  | 2313   | 4   | 0.437306  | 0.078961 | 63665283  | 63665853  | 63667678  | 6366808  |
| 254 NA18860 | [2515685 chr6 | 6 | 77495034  | 77513516  | 18483  | 12  | 0.780619  | 0.047161 | 77493568  | 77496500  | 77510011  | 7751769  |
| 255 NA18860 | [2515685 chr6 | 6 | 78326767  | 78328478  | 1712   | 2   | -0.708304 | 0.100959 | 78325974  | 78327560  | 78328067  | 7832888  |
| 256 NA18860 | [2515685 chr6 | 6 | 79023318  | 79093263  | 69946  | 70  | 0.820091  | 0.019202 | 79022028  | 79024609  | 79091909  | 7909461  |
| 257 NA18860 | [2515685 chr6 | 6 | 87462983  | 87474935  | 11953  | 11  | -0.854324 | 0.0512   | 87462897  | 87463069  | 87474530  | 8747534  |
| 258 NA18860 | [2515685 chr6 | 6 | 95289126  | 95292677  | 3552   | 5   | -0.354859 | 0.067277 | 95288832  | 95289420  | 95291838  | 9529351  |
| 259 NA18860 | [2515685 chr6 | 6 | 103844685 | 103871201 | 26517  | 17  | 3.106115  | 0.07136  | 103844347 | 103845023 | 103868241 | 10387416 |
| 260 NA18860 | [2515685 chr6 | 6 | 105691081 | 105692633 | 1553   | 2   | 0.564184  | 0.107239 | 105690707 | 105691455 | 105692144 | 10569312 |
| 261 NA18860 | [2515685 chr6 | 6 | 120671191 | 120671916 | 726    | 2   | 1.054323  | 0.115123 | 120670696 | 120671686 | 120671725 | 12067210 |
| 262 NA18860 | [2515685 chr6 | 6 | 120999664 | 121007690 | 8027   | 3   | -0.47433  | 0.093405 | 120999219 | 121000109 | 121007408 | 12100797 |
| 263 NA18860 | [2515685 chr6 | 6 | 143949218 | 143952380 | 3163   | 2   | 0.737747  | 0.119515 | 143948651 | 143949786 | 143951280 | 14395348 |
| 264 NA18860 | [2515685 chr6 | 6 | 161001907 | 161038394 | 36488  | 62  | 0.356505  | 0.015975 | 161001167 | 161002648 | 161038184 | 16103860 |
| 265 NA18860 | [2515685 chr6 | 6 | 168453011 | 168456762 | 3752   | 3   | -0.555923 | 0.081434 | 168452611 | 168453411 | 168456200 | 16845732 |
| 266 NA18860 | [2515685 chr6 | 6 | 168535543 | 168537360 | 1818   | 12  | 0.345158  | 0.035218 | 168535263 | 168535824 | 168537100 | 16853762 |
| 267 NA18860 | [2515685 chr6 | 6 | 170522124 | 170523925 | 1802   | 3   | 0.460789  | 0.086049 | 170521802 | 170522447 | 170523613 | 17052423 |
| 268 NA18860 | [2515685 chr6 | 6 | 170603879 | 170604666 | 788    | 2   | -2.488051 | 0.14645  | 170603541 | 170604217 | 170604339 | 17060499 |
| 269 NA18860 | [2515685 chr6 | 6 | 170625506 | 170627028 | 1523   | 3   | 1.542913  | 0.108983 | 170625015 | 170625997 | 170626579 | 17062747 |
| 270 NA18860 | [2515685 chr6 | 6 | 170860192 | 170860344 | 153    | 2   | 0.746717  | 0.116055 | 170860127 | 170860257 | 170860257 | 17086043 |
| 271 NA18860 | [2515685 chr7 | 7 | 188812    | 192140    | 3329   | 2   | -0.644808 | 0.116501 | 188430    | 189194    | 189783    | 197026   |
| 272 NA18860 | [2515685 chr7 | 7 | 1084125   | 1086660   | 2536   | 15  | 0.506353  | 0.037346 | 1083752   | 1084499   | 1085871   | 108744   |
| 273 NA18860 | [2515685 chr7 | 7 | 3384111   | 3392464   | 8354   | 8   | 0.957572  | 0.057826 | 3383451   | 3384772   | 3390107   | 339561   |
| 274 NA18860 | [2515685 chr7 | 7 | 6527041   | 6537353   | 10313  | 12  | 0.294948  | 0.039245 | 6526733   | 6527349   | 6536580   | 653812   |
| 275 NA18860 | [2515685 chr7 | 7 | 12297894  | 12298675  | 782    | 5   | 0.810576  | 0.073889 | 12297829  | 12297960  | 12298540  | 1229881  |
| 276 NA18860 | [2515685 chr7 | 7 | 19392964  | 19403732  | 10769  | 5   | -0.487733 | 0.072441 | 19392532  | 19393396  | 19401375  | 1945566  |
| 277 NA18860 | [2515685 chr7 | 7 | 22913632  | 22917774  | 4143   | 3   | -0.592232 | 0.092246 | 22913277  | 22913988  | 22917338  | 2291821  |
| 278 NA18860 | [2515685 chr7 | 7 | 43773800  | 43856045  | 82246  | 110 | 0.585944  | 0.013182 | 43773256  | 43774344  | 43853730  | 4385836  |
| 279 NA18860 | [2515685 chr7 | 7 | 56415676  | 56544240  | 128565 | 4   | -0.755286 | 0.07301  | 56286086  | 56418033  | 56542365  | 5654611  |



|             |               |   |           |           |        |     |           |          |           |           |           |           |
|-------------|---------------|---|-----------|-----------|--------|-----|-----------|----------|-----------|-----------|-----------|-----------|
| 280 NA18860 | [2515685 chr7 | 7 | 56652639  | 56668797  | 16159  | 12  | 0.275854  | 0.037659 | 56652228  | 56653051  | 56668252  | 5666934:  |
| 281 NA18860 | [2515685 chr7 | 7 | 57637083  | 57647241  | 10159  | 6   | 0.331172  | 0.059233 | 57634979  | 57639188  | 57645328  | 5764915:  |
| 282 NA18860 | [2515685 chr7 | 7 | 57687722  | 57693448  | 5727   | 4   | 0.414866  | 0.070279 | 57687263  | 57688181  | 57693264  | 5769363:  |
| 283 NA18860 | [2515685 chr7 | 7 | 62651575  | 62670120  | 18546  | 9   | 0.284181  | 0.041569 | 62650114  | 62653036  | 62667763  | 6267326:  |
| 284 NA18860 | [2515685 chr7 | 7 | 64029672  | 64045487  | 15816  | 45  | -0.364821 | 0.021666 | 64029291  | 64030053  | 64045069  | 6404590:  |
| 285 NA18860 | [2515685 chr7 | 7 | 64162316  | 64165981  | 3666   | 3   | 0.584224  | 0.106266 | 64160143  | 64164489  | 64165654  | 6416630:  |
| 286 NA18860 | [2515685 chr7 | 7 | 64464087  | 64479903  | 15817  | 43  | -0.34732  | 0.022128 | 64463669  | 64464506  | 64479522  | 6448028:  |
| 287 NA18860 | [2515685 chr7 | 7 | 64540847  | 64556662  | 15816  | 45  | -0.350524 | 0.021388 | 64540466  | 64541228  | 64556244  | 6455708:  |
| 288 NA18860 | [2515685 chr7 | 7 | 66185764  | 66203252  | 17489  | 35  | 0.392436  | 0.021676 | 66185376  | 66186152  | 66202563  | 6620394:  |
| 289 NA18860 | [2515685 chr7 | 7 | 69866390  | 69871056  | 4667   | 6   | 1.769518  | 0.084262 | 69865412  | 69867368  | 69870420  | 6987169:  |
| 290 NA18860 | [2515685 chr7 | 7 | 71775031  | 71789475  | 14445  | 32  | 0.376806  | 0.023616 | 71773381  | 71776681  | 71789213  | 7178973:  |
| 291 NA18860 | [2515685 chr7 | 7 | 71930810  | 71974277  | 43468  | 107 | 0.278094  | 0.011996 | 71930738  | 71930882  | 71974195  | 7197435:  |
| 292 NA18860 | [2515685 chr7 | 7 | 73760956  | 73777658  | 16703  | 36  | 0.322638  | 0.021175 | 73760884  | 73761028  | 73777316  | 7377800:  |
| 293 NA18860 | [2515685 chr7 | 7 | 74140351  | 74153050  | 12700  | 35  | 0.348351  | 0.020985 | 74140126  | 74140576  | 74152978  | 7415312:  |
| 294 NA18860 | [2515685 chr7 | 7 | 74551909  | 74623354  | 71446  | 183 | 0.273367  | 0.009189 | 74551827  | 74551991  | 74623282  | 7462342:  |
| 295 NA18860 | [2515685 chr7 | 7 | 74765926  | 74782591  | 16666  | 40  | 0.375294  | 0.021372 | 74765530  | 74766323  | 74782468  | 7478271:  |
| 296 NA18860 | [2515685 chr7 | 7 | 75790452  | 75794984  | 4533   | 5   | -0.574647 | 0.069598 | 75790248  | 75790656  | 75794325  | 7579564:  |
| 297 NA18860 | [2515685 chr7 | 7 | 75800977  | 75817580  | 16604  | 38  | 0.36569   | 0.021234 | 75800854  | 75801100  | 75817188  | 7581797:  |
| 298 NA18860 | [2515685 chr7 | 7 | 76190649  | 76192403  | 1755   | 2   | -0.793147 | 0.145983 | 76190415  | 76190884  | 76192078  | 7619272:  |
| 299 NA18860 | [2515685 chr7 | 7 | 76292207  | 76341577  | 49371  | 104 | 0.30399   | 0.012568 | 76292106  | 76292309  | 76339220  | 7634614:  |
| 300 NA18860 | [2515685 chr7 | 7 | 76425898  | 76434911  | 9014   | 9   | -0.382694 | 0.052225 | 76425707  | 76426090  | 76432910  | 7643691:  |
| 301 NA18860 | [2515685 chr7 | 7 | 76448511  | 76450306  | 1796   | 3   | -1.164077 | 0.093558 | 76447899  | 76449124  | 76449920  | 7645069:  |
| 302 NA18860 | [2515685 chr7 | 7 | 89455106  | 89456632  | 1527   | 3   | 2.739272  | 0.131271 | 89454839  | 89455373  | 89456225  | 8945703:  |
| 303 NA18860 | [2515685 chr7 | 7 | 92971481  | 92976895  | 5415   | 4   | 0.648663  | 0.086152 | 92971060  | 92971903  | 92975569  | 9297822:  |
| 304 NA18860 | [2515685 chr7 | 7 | 97201390  | 97203016  | 1627   | 5   | 0.378093  | 0.059324 | 97201229  | 97201551  | 97202739  | 9720329:  |
| 305 NA18860 | [2515685 chr7 | 7 | 99546222  | 99569466  | 23245  | 30  | 0.328007  | 0.023425 | 99545621  | 99546824  | 99568614  | 9957031:  |
| 306 NA18860 | [2515685 chr7 | 7 | 100227583 | 100241218 | 13636  | 30  | 0.382206  | 0.025319 | 100227176 | 100227991 | 100241009 | 10024142: |
| 307 NA18860 | [2515685 chr7 | 7 | 101575355 | 101591961 | 16607  | 40  | 0.394082  | 0.020868 | 101575283 | 101575428 | 101591559 | 10159236: |
| 308 NA18860 | [2515685 chr7 | 7 | 101706878 | 101925433 | 218556 | 313 | 0.64055   | 0.007484 | 101690888 | 101709235 | 101924670 | 10192619: |
| 309 NA18860 | [2515685 chr7 | 7 | 101928892 | 101930674 | 1783   | 2   | -0.519785 | 0.103636 | 101928516 | 101929269 | 101930067 | 10193128: |
| 310 NA18860 | [2515685 chr7 | 7 | 101944574 | 101955755 | 11182  | 8   | -0.493238 | 0.050687 | 101942563 | 101946585 | 101953398 | 10197676: |
| 311 NA18860 | [2515685 chr7 | 7 | 109034777 | 109048749 | 13973  | 9   | 2.530058  | 0.081581 | 109024063 | 109037134 | 109046953 | 10905054: |
| 312 NA18860 | [2515685 chr7 | 7 | 109777418 | 109782655 | 5238   | 4   | 0.88576   | 0.080426 | 109776936 | 109777901 | 109782301 | 10978301: |
| 313 NA18860 | [2515685 chr7 | 7 | 125639507 | 125644775 | 5269   | 6   | -3.334021 | 0.137361 | 125639054 | 125639961 | 125644046 | 12564550: |
| 314 NA18860 | [2515685 chr7 | 7 | 126114062 | 126121632 | 7571   | 11  | -0.335533 | 0.04355  | 126113876 | 126114248 | 126121278 | 12612198: |
| 315 NA18860 | [2515685 chr7 | 7 | 133243981 | 133257366 | 13386  | 14  | 3.223033  | 0.081086 | 133243755 | 133244207 | 133255009 | 13326093: |
| 316 NA18860 | [2515685 chr7 | 7 | 141495319 | 141505136 | 9818   | 12  | -0.285955 | 0.041383 | 141494721 | 141495918 | 141504428 | 14150584: |
| 317 NA18860 | [2515685 chr7 | 7 | 141505136 | 141521152 | 16017  | 19  | -1.692698 | 0.052095 | 141504428 | 141505844 | 141520892 | 14152141: |
| 318 NA18860 | [2515685 chr7 | 7 | 143320629 | 143417155 | 96527  | 172 | -0.498902 | 0.007551 | 143320373 | 143320886 | 143416975 | 14341733: |
| 319 NA18860 | [2515685 chr7 | 7 | 143420642 | 143511719 | 91078  | 183 | -0.498902 | 0.007551 | 143420120 | 143421165 | 143511270 | 14351216: |
| 320 NA18860 | [2515685 chr7 | 7 | 156939035 | 156942423 | 3389   | 5   | -0.32371  | 0.0563   | 156938932 | 156939138 | 156941474 | 15694337: |
| 321 NA18860 | [2515685 chr7 | 7 | 156976112 | 156978464 | 2353   | 2   | 0.652429  | 0.099608 | 156975812 | 156976413 | 156977896 | 15697903: |
| 322 NA18860 | [2515685 chr7 | 7 | 158207288 | 158209880 | 2593   | 2   | 0.78087   | 0.119214 | 158206344 | 158208233 | 158209333 | 15821042: |
| 323 NA18860 | [2515685 chr7 | 7 | 158617060 | 158624385 | 7326   | 6   | 0.892023  | 0.068314 | 158616763 | 158617357 | 158622028 | 15862674: |
| 324 NA18860 | [2515685 chr8 | 8 | 13248     | 32375     | 19128  | 30  | -0.288907 | 0.027066 | 12957     | 13540     | 32228     | 32523     |
| 325 NA18860 | [2515685 chr8 | 8 | 2202770   | 2203520   | 751    | 3   | -1.058437 | 0.076627 | 2202506   | 2203034   | 2203382   | 220365:   |
| 326 NA18860 | [2515685 chr8 | 8 | 2238729   | 2253798   | 15070  | 10  | 0.844366  | 0.051424 | 2233839   | 2241488   | 2251039   | 225752:   |
| 327 NA18860 | [2515685 chr8 | 8 | 4110204   | 4112526   | 2323   | 2   | 3.527195  | 0.231762 | 4109692   | 4110717   | 4112031   | 411302:   |
| 328 NA18860 | [2515685 chr8 | 8 | 4276095   | 4277833   | 1739   | 2   | -0.594687 | 0.107374 | 4275741   | 4276450   | 4277317   | 427834:   |
| 329 NA18860 | [2515685 chr8 | 8 | 4634163   | 4637132   | 2970   | 2   | -0.567696 | 0.096425 | 4633887   | 4634440   | 4636699   | 463756:   |
| 330 NA18860 | [2515685 chr8 | 8 | 4816266   | 4829987   | 13722  | 14  | -0.26309  | 0.041363 | 4815949   | 4816584   | 4829088   | 483088:   |
| 331 NA18860 | [2515685 chr8 | 8 | 5582875   | 5594011   | 11137  | 9   | 0.941297  | 0.050385 | 5582615   | 5583135   | 5592820   | 559520:   |
| 332 NA18860 | [2515685 chr8 | 8 | 7061162   | 7073773   | 12612  | 21  | 0.27214   | 0.029515 | 7060897   | 7061427   | 7073366   | 707418:   |
| 333 NA18860 | [2515685 chr8 | 8 | 7094852   | 7146048   | 51197  | 204 | 0.59516   | 0.003384 | 7092427   | 7097278   | 7145836   | 714626:   |
| 334 NA18860 | [2515685 chr8 | 8 | 7154135   | 7194685   | 40551  | 79  | 0.59516   | 0.003384 | 7153924   | 7154347   | 7194256   | 719511:   |

|             |               |   |           |           |        |      |           |          |           |           |           |           |
|-------------|---------------|---|-----------|-----------|--------|------|-----------|----------|-----------|-----------|-----------|-----------|
| 335 NA18860 | [2515685 chr8 | 8 | 7215164   | 7774981   | 559818 | 1010 | 0.59516   | 0.003384 | 7213320   | 7217008   | 7774750   | 7775212   |
| 336 NA18860 | [2515685 chr8 | 8 | 7777281   | 7930292   | 153012 | 308  | 0.59516   | 0.003384 | 7777081   | 7777481   | 7930155   | 7930425   |
| 337 NA18860 | [2515685 chr8 | 8 | 7951432   | 7966244   | 14813  | 38   | 0.269987  | 0.022682 | 7951122   | 7951743   | 7965980   | 7966505   |
| 338 NA18860 | [2515685 chr8 | 8 | 11985528  | 12570351  | 584824 | 756  | 0.275597  | 0.005033 | 11982232  | 11988287  | 12570066  | 12570631  |
| 339 NA18860 | [2515685 chr8 | 8 | 15092153  | 15095554  | 3402   | 4    | -0.868837 | 0.080231 | 15091810  | 15092496  | 15095240  | 15095865  |
| 340 NA18860 | [2515685 chr8 | 8 | 16245461  | 16251509  | 6049   | 6    | -0.86416  | 0.066451 | 16245129  | 16245794  | 16250812  | 16252207  |
| 341 NA18860 | [2515685 chr8 | 8 | 16305945  | 16323850  | 17906  | 17   | -0.921409 | 0.037756 | 16304897  | 16306994  | 16323221  | 16324475  |
| 342 NA18860 | [2515685 chr8 | 8 | 16895718  | 16897030  | 1313   | 2    | 0.629179  | 0.096997 | 16895356  | 16896080  | 16896828  | 16897235  |
| 343 NA18860 | [2515685 chr8 | 8 | 21832667  | 21833967  | 1301   | 2    | 0.744325  | 0.10247  | 21832108  | 21833227  | 21833678  | 21834257  |
| 344 NA18860 | [2515685 chr8 | 8 | 22321038  | 22322690  | 1653   | 2    | 0.606127  | 0.108332 | 22320584  | 22321493  | 22322216  | 22323165  |
| 345 NA18860 | [2515685 chr8 | 8 | 23047051  | 23075444  | 28394  | 22   | 0.282932  | 0.031774 | 23045918  | 23048185  | 23074934  | 23075955  |
| 346 NA18860 | [2515685 chr8 | 8 | 49081430  | 49084499  | 3070   | 2    | 0.568386  | 0.108108 | 49079497  | 49083364  | 49084089  | 49084910  |
| 347 NA18860 | [2515685 chr8 | 8 | 56306906  | 56419550  | 112645 | 2    | -0.678454 | 0.115348 | 56244078  | 56309665  | 56416791  | 56614471  |
| 348 NA18860 | [2515685 chr8 | 8 | 58278355  | 58289214  | 10860  | 9    | 0.916473  | 0.045119 | 58277116  | 58279595  | 58288084  | 58290345  |
| 349 NA18860 | [2515685 chr8 | 8 | 58290538  | 58296106  | 5569   | 7    | 0.368305  | 0.057728 | 58290345  | 58290731  | 58295669  | 58296545  |
| 350 NA18860 | [2515685 chr8 | 8 | 63378168  | 63387857  | 9690   | 14   | -0.723574 | 0.043866 | 63377712  | 63378624  | 63387483  | 63388235  |
| 351 NA18860 | [2515685 chr8 | 8 | 85423649  | 85431920  | 8272   | 7    | 0.871819  | 0.057437 | 85423043  | 85424256  | 85431347  | 85432495  |
| 352 NA18860 | [2515685 chr8 | 8 | 86742169  | 86910255  | 168087 | 105  | 0.529531  | 0.012885 | 86741757  | 86742581  | 86910002  | 86910505  |
| 353 NA18860 | [2515685 chr8 | 8 | 103122790 | 103125472 | 2683   | 3    | -0.761672 | 0.087352 | 103122170 | 103123410 | 103124489 | 10312645  |
| 354 NA18860 | [2515685 chr8 | 8 | 123128534 | 123130270 | 1737   | 2    | -0.941965 | 0.126137 | 123127942 | 123129127 | 123130019 | 12313052  |
| 355 NA18860 | [2515685 chr8 | 8 | 144782805 | 144785960 | 3156   | 2    | 0.862743  | 0.10433  | 144771440 | 144785564 | 144785821 | 144786095 |
| 356 NA18860 | [2515685 chr9 | 9 | 1022      | 29250     | 28229  | 56   | 0.467691  | 0.019171 | 1         | 2044      | 27671     | 30829     |
| 357 NA18860 | [2515685 chr9 | 9 | 599514    | 695015    | 95502  | 99   | -0.816783 | 0.015966 | 599060    | 599968    | 694515    | 695515    |
| 358 NA18860 | [2515685 chr9 | 9 | 22658479  | 22660918  | 2440   | 2    | -0.683717 | 0.088526 | 22658170  | 22658788  | 22660589  | 22661247  |
| 359 NA18860 | [2515685 chr9 | 9 | 29849541  | 29850691  | 1151   | 2    | 0.688479  | 0.122597 | 29849162  | 29849920  | 29850432  | 29850957  |
| 360 NA18860 | [2515685 chr9 | 9 | 33646675  | 33648138  | 1464   | 2    | -0.602112 | 0.117797 | 33646355  | 33646996  | 33647857  | 33648420  |
| 361 NA18860 | [2515685 chr9 | 9 | 33688323  | 33689560  | 1238   | 2    | -0.73184  | 0.115483 | 33687588  | 33689059  | 33689374  | 33689747  |
| 362 NA18860 | [2515685 chr9 | 9 | 38859279  | 38864486  | 5208   | 12   | -0.626342 | 0.041999 | 38859110  | 38859448  | 38864433  | 38864535  |
| 363 NA18860 | [2515685 chr9 | 9 | 38872054  | 38876389  | 4336   | 10   | -0.445706 | 0.046595 | 38868205  | 38874419  | 38876152  | 38876621  |
| 364 NA18860 | [2515685 chr9 | 9 | 39345306  | 39346684  | 1379   | 4    | 0.523662  | 0.063682 | 39345148  | 39345464  | 39346452  | 39346911  |
| 365 NA18860 | [2515685 chr9 | 9 | 39656604  | 39657987  | 1384   | 4    | 0.523662  | 0.063682 | 39656446  | 39656762  | 39657768  | 39658207  |
| 366 NA18860 | [2515685 chr9 | 9 | 40429163  | 40430553  | 1391   | 4    | 0.523666  | 0.063682 | 40429005  | 40429321  | 40430327  | 40430780  |
| 367 NA18860 | [2515685 chr9 | 9 | 40885620  | 40887009  | 1390   | 4    | 0.523658  | 0.063681 | 40885394  | 40885846  | 40886852  | 40887167  |
| 368 NA18860 | [2515685 chr9 | 9 | 41234952  | 41240163  | 5212   | 10   | -0.637763 | 0.046609 | 41234900  | 41235005  | 41239994  | 41240335  |
| 369 NA18860 | [2515685 chr9 | 9 | 41417315  | 41418704  | 1390   | 4    | 0.523659  | 0.063681 | 41417157  | 41417473  | 41418479  | 41418925  |
| 370 NA18860 | [2515685 chr9 | 9 | 42040752  | 42046168  | 5417   | 4    | 0.386951  | 0.072391 | 42039958  | 42041547  | 42046013  | 42046325  |
| 371 NA18860 | [2515685 chr9 | 9 | 42754727  | 42756705  | 1979   | 3    | -0.422867 | 0.076088 | 42754385  | 42755070  | 42755767  | 42757645  |
| 372 NA18860 | [2515685 chr9 | 9 | 42875403  | 42877381  | 1979   | 3    | -0.422862 | 0.076087 | 42875061  | 42875746  | 42876443  | 42878320  |
| 373 NA18860 | [2515685 chr9 | 9 | 43021458  | 43021779  | 322    | 2    | 0.648115  | 0.098402 | 43021390  | 43021526  | 43021698  | 43021867  |
| 374 NA18860 | [2515685 chr9 | 9 | 43036915  | 43038373  | 1459   | 6    | 0.443451  | 0.053809 | 43036691  | 43037140  | 43038286  | 43038846  |
| 375 NA18860 | [2515685 chr9 | 9 | 43406103  | 43407037  | 935    | 2    | 0.639543  | 0.120618 | 43406061  | 43406145  | 43406642  | 43407435  |
| 376 NA18860 | [2515685 chr9 | 9 | 44040079  | 44063066  | 22988  | 16   | -0.308904 | 0.032428 | 43969513  | 44042444  | 44062717  | 44063415  |
| 377 NA18860 | [2515685 chr9 | 9 | 44148596  | 44149697  | 1102   | 2    | 0.592699  | 0.107391 | 44148386  | 44148807  | 44148930  | 44150465  |
| 378 NA18860 | [2515685 chr9 | 9 | 44523967  | 44528456  | 4490   | 5    | -0.387174 | 0.065897 | 44523487  | 44524448  | 44527869  | 44529045  |
| 379 NA18860 | [2515685 chr9 | 9 | 45180288  | 45181985  | 1698   | 4    | -0.411977 | 0.073185 | 45179935  | 45180641  | 45181694  | 45182271  |
| 380 NA18860 | [2515685 chr9 | 9 | 45405808  | 45416494  | 10687  | 22   | -0.251854 | 0.030825 | 45401306  | 45408173  | 45415849  | 45417135  |
| 381 NA18860 | [2515685 chr9 | 9 | 45500804  | 45502504  | 1701   | 4    | -0.411977 | 0.073185 | 45500511  | 45501097  | 45502151  | 45502857  |
| 382 NA18860 | [2515685 chr9 | 9 | 66036364  | 66039825  | 3462   | 5    | -0.512656 | 0.068306 | 66036206  | 66036523  | 66037460  | 66043675  |
| 383 NA18860 | [2515685 chr9 | 9 | 66047392  | 66052737  | 5346   | 11   | -0.644933 | 0.046054 | 66047340  | 66047445  | 66052707  | 66052767  |
| 384 NA18860 | [2515685 chr9 | 9 | 66393542  | 66406646  | 13105  | 24   | -0.251754 | 0.029264 | 66389640  | 66395907  | 66406335  | 66406955  |
| 385 NA18860 | [2515685 chr9 | 9 | 66540233  | 66545361  | 5129   | 11   | -0.342609 | 0.046893 | 66540055  | 66540411  | 66545104  | 66545615  |
| 386 NA18860 | [2515685 chr9 | 9 | 68274323  | 68301710  | 27388  | 2    | -0.691129 | 0.104562 | 68272461  | 68276185  | 68299345  | 68359405  |
| 387 NA18860 | [2515685 chr9 | 9 | 69247738  | 69260009  | 12272  | 9    | 0.256146  | 0.047858 | 69247278  | 69248198  | 69257644  | 69264285  |
| 388 NA18860 | [2515685 chr9 | 9 | 76777070  | 76779384  | 2315   | 2    | 0.718405  | 0.121278 | 76776756  | 76777385  | 76778920  | 76779845  |
| 389 NA18860 | [2515685 chr9 | 9 | 89405187  | 89407924  | 2738   | 2    | -0.983322 | 0.110791 | 89404572  | 89405803  | 89407164  | 89408685  |

|             |                |    |           |           |        |     |           |          |           |           |           |          |
|-------------|----------------|----|-----------|-----------|--------|-----|-----------|----------|-----------|-----------|-----------|----------|
| 390 NA18860 | [2515685 chr9  | 9  | 104440993 | 104447148 | 6156   | 8   | -0.715797 | 0.05456  | 104440221 | 104441766 | 104446828 | 10444746 |
| 391 NA18860 | [2515685 chr9  | 9  | 109277234 | 109279241 | 2008   | 3   | -0.427384 | 0.084868 | 109276884 | 109277585 | 109278980 | 10927950 |
| 392 NA18860 | [2515685 chr9  | 9  | 112797331 | 112800868 | 3538   | 5   | 0.335612  | 0.063622 | 112796748 | 112797914 | 112800574 | 11280116 |
| 393 NA18860 | [2515685 chr9  | 9  | 112902065 | 112932269 | 30205  | 42  | 0.588585  | 0.01993  | 112901557 | 112902574 | 112931621 | 11293291 |
| 394 NA18860 | [2515685 chr9  | 9  | 129706215 | 129716213 | 9999   | 5   | 0.397514  | 0.065367 | 129705564 | 129706866 | 129714794 | 12971763 |
| 395 NA18860 | [2515685 chr9  | 9  | 130841486 | 130848877 | 7392   | 7   | 0.307844  | 0.054753 | 130840854 | 130842119 | 130848528 | 13084922 |
| 396 NA18860 | [2515685 chr9  | 9  | 135438416 | 135444067 | 5652   | 2   | 2.812541  | 0.156129 | 135383632 | 135440781 | 135443016 | 13544511 |
| 397 NA18860 | [2515685 chr9  | 9  | 138188003 | 138190957 | 2955   | 47  | 0.356997  | 0.020704 | 138187808 | 138188198 | 138190683 | 13819123 |
| 398 NA18860 | [2515685 chr10 | 10 | 3099589   | 3101985   | 2397   | 2   | 0.629983  | 0.115666 | 3098962   | 3100217   | 3101441   | 310252   |
| 399 NA18860 | [2515685 chr10 | 10 | 4279984   | 4282023   | 2040   | 2   | 2.05076   | 0.161075 | 4279599   | 4280370   | 4281521   | 428252   |
| 400 NA18860 | [2515685 chr10 | 10 | 6693908   | 6703893   | 9986   | 8   | 0.774716  | 0.057072 | 6692231   | 6695585   | 6703779   | 670400   |
| 401 NA18860 | [2515685 chr10 | 10 | 19788068  | 19793233  | 5166   | 5   | -0.463544 | 0.066636 | 19787726  | 19788411  | 19791659  | 1979480  |
| 402 NA18860 | [2515685 chr10 | 10 | 37487278  | 37529195  | 41918  | 64  | -0.251408 | 0.016291 | 37486985  | 37487572  | 37528890  | 3752950  |
| 403 NA18860 | [2515685 chr10 | 10 | 42555733  | 42565662  | 9930   | 14  | -0.321196 | 0.040135 | 42555543  | 42555924  | 42565423  | 4256590  |
| 404 NA18860 | [2515685 chr10 | 10 | 45625268  | 45627174  | 1907   | 2   | -0.989599 | 0.089029 | 45625050  | 45625486  | 45626243  | 4562810  |
| 405 NA18860 | [2515685 chr10 | 10 | 45690268  | 45708524  | 18257  | 44  | -0.394151 | 0.020556 | 45690070  | 45690466  | 45708297  | 4570875  |
| 406 NA18860 | [2515685 chr10 | 10 | 45721471  | 45728964  | 7494   | 21  | -0.460308 | 0.029712 | 45721272  | 45721671  | 45728834  | 4572909  |
| 407 NA18860 | [2515685 chr10 | 10 | 45744145  | 45744762  | 618    | 2   | -0.498438 | 0.096621 | 45743850  | 45744441  | 45744478  | 4574504  |
| 408 NA18860 | [2515685 chr10 | 10 | 46111857  | 46130305  | 18449  | 31  | -0.391504 | 0.023652 | 46111602  | 46112112  | 46129754  | 4613085  |
| 409 NA18860 | [2515685 chr10 | 10 | 46168755  | 46170845  | 2091   | 9   | -0.371622 | 0.047047 | 46168488  | 46169022  | 46170704  | 4617098  |
| 410 NA18860 | [2515685 chr10 | 10 | 46175361  | 46179274  | 3914   | 13  | -0.352036 | 0.003765 | 46175199  | 46175523  | 46178889  | 4617965  |
| 411 NA18860 | [2515685 chr10 | 10 | 46185144  | 46221325  | 36182  | 93  | -0.323258 | 0.033618 | 46184361  | 46185928  | 46221069  | 4622158  |
| 412 NA18860 | [2515685 chr10 | 10 | 46230274  | 46381170  | 150897 | 250 | -0.323258 | 0.003618 | 46230243  | 46230306  | 46381004  | 4638133  |
| 413 NA18860 | [2515685 chr10 | 10 | 46385672  | 46600786  | 215115 | 296 | -0.323258 | 0.003618 | 46385485  | 46385859  | 46600776  | 4660079  |
| 414 NA18860 | [2515685 chr10 | 10 | 46610029  | 46643240  | 33212  | 98  | -0.323258 | 0.003618 | 46609739  | 46610319  | 46643136  | 4664334  |
| 415 NA18860 | [2515685 chr10 | 10 | 46644726  | 46675076  | 30351  | 108 | -0.323258 | 0.003618 | 46644156  | 46645296  | 46675054  | 4667509  |
| 416 NA18860 | [2515685 chr10 | 10 | 46677788  | 47135244  | 457457 | 479 | -0.323258 | 0.003618 | 46677220  | 46678357  | 47135076  | 4713541  |
| 417 NA18860 | [2515685 chr10 | 10 | 47140352  | 47173707  | 33356  | 59  | -0.323258 | 0.003618 | 47139905  | 47140800  | 47173507  | 4717390  |
| 418 NA18860 | [2515685 chr10 | 10 | 47230731  | 47231502  | 772    | 2   | -0.583607 | 0.090177 | 47230574  | 47230889  | 47231201  | 4723180  |
| 419 NA18860 | [2515685 chr10 | 10 | 47723232  | 47758287  | 35056  | 106 | -0.429172 | 0.013252 | 47575187  | 47725982  | 47758256  | 4775831  |
| 420 NA18860 | [2515685 chr10 | 10 | 47767237  | 47774830  | 7594   | 28  | -0.285961 | 0.011769 | 47766982  | 47767493  | 47774609  | 4777505  |
| 421 NA18860 | [2515685 chr10 | 10 | 47776453  | 47813260  | 36808  | 105 | -0.285961 | 0.011769 | 47776377  | 47776530  | 47813101  | 4781341  |
| 422 NA18860 | [2515685 chr10 | 10 | 47882376  | 47882889  | 514    | 2   | -0.544565 | 0.089556 | 47882318  | 47882435  | 47882645  | 4788313  |
| 423 NA18860 | [2515685 chr10 | 10 | 47889059  | 47889830  | 772    | 2   | -0.583607 | 0.090177 | 47888902  | 47889217  | 47889529  | 4789013  |
| 424 NA18860 | [2515685 chr10 | 10 | 48497952  | 48516837  | 18886  | 30  | -0.392819 | 0.023892 | 48497240  | 48498665  | 48516285  | 4851739  |
| 425 NA18860 | [2515685 chr10 | 10 | 48565128  | 48569551  | 4424   | 16  | -0.339352 | 0.034261 | 48564967  | 48565289  | 48569482  | 4856962  |
| 426 NA18860 | [2515685 chr10 | 10 | 48574881  | 48584011  | 9131   | 23  | -0.353857 | 0.018271 | 48574098  | 48575665  | 48583989  | 4858403  |
| 427 NA18860 | [2515685 chr10 | 10 | 48586485  | 48597050  | 10566  | 25  | -0.353857 | 0.018271 | 48586154  | 48586817  | 48594300  | 4860023  |
| 428 NA18860 | [2515685 chr10 | 10 | 48606695  | 48607699  | 1005   | 6   | -0.432742 | 0.055587 | 48606688  | 48606702  | 48607675  | 4860772  |
| 429 NA18860 | [2515685 chr10 | 10 | 48620019  | 48865591  | 245573 | 176 | -0.409178 | 0.009723 | 48619988  | 48620051  | 48865564  | 4886561  |
| 430 NA18860 | [2515685 chr10 | 10 | 50724176  | 50762101  | 37926  | 109 | -0.341732 | 0.013322 | 50721723  | 50726630  | 50761350  | 5076285  |
| 431 NA18860 | [2515685 chr10 | 10 | 50764098  | 50767956  | 3859   | 4   | 0.359763  | 0.069712 | 50763834  | 50764362  | 50767777  | 5076813  |
| 432 NA18860 | [2515685 chr10 | 10 | 50939986  | 50983832  | 43847  | 122 | -0.335718 | 0.01237  | 50937807  | 50942165  | 50983081  | 5098458  |
| 433 NA18860 | [2515685 chr10 | 10 | 50990453  | 50990723  | 271    | 2   | -0.973499 | 0.190108 | 50990376  | 50990531  | 50990678  | 5099076  |
| 434 NA18860 | [2515685 chr10 | 10 | 50997608  | 50998225  | 618    | 2   | -0.498438 | 0.096621 | 50997313  | 50997904  | 50997941  | 5099851  |
| 435 NA18860 | [2515685 chr10 | 10 | 51017981  | 51020588  | 2608   | 10  | -0.401161 | 0.048886 | 51017719  | 51018244  | 51020414  | 5102076  |
| 436 NA18860 | [2515685 chr10 | 10 | 51116615  | 51129602  | 12988  | 16  | -0.427447 | 0.034463 | 51067634  | 51119365  | 51128757  | 5113044  |
| 437 NA18860 | [2515685 chr10 | 10 | 51314160  | 51316767  | 2608   | 8   | -0.385213 | 0.054036 | 51313986  | 51314334  | 51316502  | 5131703  |
| 438 NA18860 | [2515685 chr10 | 10 | 51336521  | 51337138  | 618    | 2   | -0.498438 | 0.096621 | 51336237  | 51336806  | 51336843  | 5133743  |
| 439 NA18860 | [2515685 chr10 | 10 | 51350904  | 51394886  | 43983  | 117 | -0.334307 | 0.012559 | 51350153  | 51351656  | 51392585  | 5139718  |
| 440 NA18860 | [2515685 chr10 | 10 | 51578086  | 51580352  | 2267   | 5   | 0.389013  | 0.067415 | 51578082  | 51578090  | 51580153  | 5158055  |
| 441 NA18860 | [2515685 chr10 | 10 | 51580352  | 51582154  | 1803   | 3   | 1.384827  | 0.107987 | 51580153  | 51580551  | 51581725  | 5158258  |
| 442 NA18860 | [2515685 chr10 | 10 | 56117212  | 56139275  | 22064  | 20  | -1.000224 | 0.035557 | 56115764  | 56118661  | 56138931  | 5613961  |
| 443 NA18860 | [2515685 chr10 | 10 | 58515338  | 58521341  | 6004   | 8   | -0.803825 | 0.054003 | 58514982  | 58515695  | 58521055  | 5852162  |
| 444 NA18860 | [2515685 chr10 | 10 | 78783044  | 78784751  | 1708   | 2   | -0.553186 | 0.100792 | 78782756  | 78783332  | 78784370  | 7878513  |

|             |                |    |           |           |       |     |           |          |           |           |           |           |
|-------------|----------------|----|-----------|-----------|-------|-----|-----------|----------|-----------|-----------|-----------|-----------|
| 445 NA18860 | [2515685 chr10 | 10 | 81662330  | 81669493  | 7164  | 11  | -0.260867 | 0.043836 | 81662046  | 81662614  | 81669128  | 81669851  |
| 446 NA18860 | [2515685 chr10 | 10 | 88866216  | 88962020  | 95805 | 105 | -0.37851  | 0.013685 | 88865617  | 88866816  | 88961639  | 8896240   |
| 447 NA18860 | [2515685 chr10 | 10 | 89144361  | 89180666  | 36306 | 57  | -0.297829 | 0.018987 | 89144303  | 89144420  | 89180586  | 89180741  |
| 448 NA18860 | [2515685 chr10 | 10 | 122760140 | 122777315 | 17176 | 11  | -0.696605 | 0.04741  | 122759805 | 122760476 | 122776760 | 12277787  |
| 449 NA18860 | [2515685 chr10 | 10 | 124331349 | 124348266 | 16918 | 17  | 0.632558  | 0.035168 | 124330248 | 124332451 | 124348238 | 12434829  |
| 450 NA18860 | [2515685 chr10 | 10 | 133602364 | 133603160 | 797   | 11  | -0.297352 | 0.043666 | 133602112 | 133602617 | 133602987 | 13360333  |
| 451 NA18860 | [2515685 chr10 | 10 | 134168766 | 134170259 | 1494  | 17  | -1.282162 | 0.042293 | 134168524 | 134169008 | 134170097 | 13417042  |
| 452 NA18860 | [2515685 chr10 | 10 | 135365507 | 135367159 | 1653  | 2   | 0.715362  | 0.115683 | 135364999 | 135366016 | 135366656 | 13536766  |
| 453 NA18860 | [2515685 chr11 | 11 | 83595     | 84037     | 443   | 2   | 0.746717  | 0.116055 | 83219     | 83972     | 83972     | 84102     |
| 454 NA18860 | [2515685 chr11 | 11 | 419152    | 423505    | 4354  | 4   | 0.406266  | 0.071747 | 418832    | 419473    | 423111    | 423895    |
| 455 NA18860 | [2515685 chr11 | 11 | 3628748   | 3632795   | 4048  | 6   | -1.198179 | 0.066988 | 3625722   | 3631775   | 3632594   | 3632996   |
| 456 NA18860 | [2515685 chr11 | 11 | 5717038   | 5722035   | 4998  | 3   | 2.445253  | 0.141765 | 5716660   | 5717416   | 5718945   | 5725487   |
| 457 NA18860 | [2515685 chr11 | 11 | 5741269   | 5765454   | 24186 | 31  | 3.105812  | 0.050329 | 5741059   | 5741480   | 5764555   | 5766354   |
| 458 NA18860 | [2515685 chr11 | 11 | 5830457   | 5843042   | 12586 | 12  | -0.790327 | 0.047381 | 5828206   | 5832709   | 5839952   | 5849172   |
| 459 NA18860 | [2515685 chr11 | 11 | 10224770  | 10229788  | 5019  | 5   | -0.618225 | 0.07656  | 10219961  | 10227860  | 10227972  | 10231601  |
| 460 NA18860 | [2515685 chr11 | 11 | 11831868  | 11833089  | 1222  | 2   | 0.968558  | 0.116285 | 11831412  | 11832324  | 11832853  | 11833321  |
| 461 NA18860 | [2515685 chr11 | 11 | 18903443  | 18919581  | 16139 | 29  | 0.529827  | 0.027874 | 18897800  | 18906533  | 18919224  | 18919931  |
| 462 NA18860 | [2515685 chr11 | 11 | 21773893  | 21800245  | 26353 | 28  | -0.947612 | 0.030706 | 21762262  | 21776983  | 21797794  | 21802691  |
| 463 NA18860 | [2515685 chr11 | 11 | 25658875  | 25671969  | 13095 | 17  | -0.978924 | 0.04017  | 25658601  | 25659149  | 25670759  | 25673171  |
| 464 NA18860 | [2515685 chr11 | 11 | 28965605  | 28969186  | 3582  | 5   | 4.614946  | 0.158798 | 28965284  | 28965927  | 28968702  | 28969671  |
| 465 NA18860 | [2515685 chr11 | 11 | 41213698  | 41217472  | 3775  | 4   | -0.429571 | 0.075442 | 41213437  | 41213960  | 41216876  | 41218061  |
| 466 NA18860 | [2515685 chr11 | 11 | 48284073  | 48284771  | 699   | 2   | 1.04678   | 0.10712  | 48283862  | 48284285  | 48284572  | 48284971  |
| 467 NA18860 | [2515685 chr11 | 11 | 49665830  | 49715838  | 50009 | 36  | 0.495283  | 0.024759 | 49665251  | 49666410  | 49712748  | 49721981  |
| 468 NA18860 | [2515685 chr11 | 11 | 54977173  | 54979405  | 2233  | 2   | -0.612787 | 0.093841 | 54976212  | 54978135  | 54979178  | 54979631  |
| 469 NA18860 | [2515685 chr11 | 11 | 55124643  | 55212658  | 88016 | 98  | -0.875973 | 0.016252 | 55124460  | 55124827  | 55209568  | 55215751  |
| 470 NA18860 | [2515685 chr11 | 11 | 55212669  | 55224124  | 11456 | 10  | 0.689135  | 0.048619 | 55209568  | 55215759  | 55223084  | 55225161  |
| 471 NA18860 | [2515685 chr11 | 11 | 60722802  | 60777477  | 54676 | 72  | 0.44631   | 0.015452 | 60722435  | 60723170  | 60776810  | 60778141  |
| 472 NA18860 | [2515685 chr11 | 11 | 73812690  | 73818580  | 5891  | 4   | -0.55711  | 0.07855  | 73812400  | 73812981  | 73818213  | 73818941  |
| 473 NA18860 | [2515685 chr11 | 11 | 81149111  | 81151129  | 2019  | 2   | 0.728281  | 0.119182 | 81148927  | 81149295  | 81150916  | 81151341  |
| 474 NA18860 | [2515685 chr11 | 11 | 89323920  | 89327673  | 3754  | 8   | -0.312707 | 0.052714 | 89323666  | 89324175  | 89327396  | 89327951  |
| 475 NA18860 | [2515685 chr11 | 11 | 90450569  | 90452416  | 1848  | 3   | 0.418913  | 0.079942 | 90450345  | 90450794  | 90452225  | 90452601  |
| 476 NA18860 | [2515685 chr11 | 11 | 106744846 | 106751061 | 6216  | 9   | -0.903577 | 0.057609 | 106744561 | 106745131 | 106747971 | 106754831 |
| 477 NA18860 | [2515685 chr11 | 11 | 134079989 | 134112290 | 32302 | 35  | 0.573044  | 0.025427 | 134079182 | 134080796 | 134111845 | 13411273  |
| 478 NA18860 | [2515685 chr12 | 12 | 15154     | 50245     | 35092 | 12  | 0.335532  | 0.041438 | 11657     | 18651     | 46748     | 57115     |
| 479 NA18860 | [2515685 chr12 | 12 | 737102    | 744802    | 7701  | 8   | 0.952678  | 0.055334 | 736616    | 737588    | 744211    | 745394    |
| 480 NA18860 | [2515685 chr12 | 12 | 2112534   | 2127840   | 15307 | 16  | 0.746953  | 0.038741 | 2109107   | 2115961   | 2127279   | 2128402   |
| 481 NA18860 | [2515685 chr12 | 12 | 6113530   | 6118188   | 4659  | 4   | 0.709009  | 0.084043 | 6111640   | 6115421   | 6117816   | 6118567   |
| 482 NA18860 | [2515685 chr12 | 12 | 8262986   | 8270350   | 7365  | 17  | 0.777739  | 0.034106 | 8262374   | 8263598   | 8269654   | 8271046   |
| 483 NA18860 | [2515685 chr12 | 12 | 11060019  | 11142012  | 81994 | 100 | -0.335442 | 0.014786 | 11059499  | 11060539  | 11141608  | 11142417  |
| 484 NA18860 | [2515685 chr12 | 12 | 11398899  | 11436142  | 37244 | 33  | -0.444684 | 0.025732 | 11398591  | 11399207  | 11435669  | 11436611  |
| 485 NA18860 | [2515685 chr12 | 12 | 33989909  | 34000302  | 10394 | 18  | -1.339801 | 0.046075 | 33989629  | 33990189  | 34000127  | 34000471  |
| 486 NA18860 | [2515685 chr12 | 12 | 34244907  | 34248933  | 4027  | 2   | -1.715146 | 0.136727 | 34238230  | 34248404  | 34248672  | 34249191  |
| 487 NA18860 | [2515685 chr12 | 12 | 34251087  | 34252880  | 1794  | 4   | -0.91572  | 0.086247 | 34250780  | 34251394  | 34252581  | 34253181  |
| 488 NA18860 | [2515685 chr12 | 12 | 36221304  | 36229027  | 7724  | 9   | 0.395424  | 0.047463 | 36220304  | 36222304  | 36228905  | 36229151  |
| 489 NA18860 | [2515685 chr12 | 12 | 36904192  | 36918698  | 14507 | 12  | -0.549827 | 0.048791 | 36903982  | 36904402  | 36918598  | 36918791  |
| 490 NA18860 | [2515685 chr12 | 12 | 62420471  | 62424958  | 4488  | 4   | -0.373838 | 0.070035 | 62419885  | 62421057  | 62424715  | 62425201  |
| 491 NA18860 | [2515685 chr12 | 12 | 70475445  | 70476812  | 1368  | 2   | -0.977654 | 0.119308 | 70475180  | 70475711  | 70476524  | 70477101  |
| 492 NA18860 | [2515685 chr12 | 12 | 70529599  | 70532593  | 2995  | 2   | -0.880393 | 0.113201 | 70529317  | 70529881  | 70530310  | 70534871  |
| 493 NA18860 | [2515685 chr12 | 12 | 78656134  | 78665261  | 9128  | 9   | -0.576081 | 0.052733 | 78654687  | 78657582  | 78664736  | 78665781  |
| 494 NA18860 | [2515685 chr12 | 12 | 82111900  | 82114981  | 3082  | 2   | -0.522384 | 0.09424  | 82110912  | 82112888  | 82113489  | 82116471  |
| 495 NA18860 | [2515685 chr12 | 12 | 87338116  | 87347005  | 8890  | 4   | -0.469343 | 0.078297 | 87329173  | 87341613  | 87346311  | 87347701  |
| 496 NA18860 | [2515685 chr12 | 12 | 98296195  | 98302027  | 5833  | 12  | -0.810275 | 0.04572  | 98295885  | 98296506  | 98298530  | 98305941  |
| 497 NA18860 | [2515685 chr12 | 12 | 128601598 | 128602937 | 1340  | 2   | -0.558652 | 0.096148 | 128601341 | 128601856 | 128602454 | 12860342  |
| 498 NA18860 | [2515685 chr13 | 13 | 18221776  | 18277248  | 55473 | 18  | 0.26199   | 0.034229 | 18218187  | 18225365  | 18275111  | 18279381  |
| 499 NA18860 | [2515685 chr13 | 13 | 20436112  | 20450738  | 14627 | 4   | 0.482076  | 0.079063 | 20435513  | 20436712  | 20446049  | 20468871  |

|             |                |    |           |           |        |     |           |          |           |           |           |          |
|-------------|----------------|----|-----------|-----------|--------|-----|-----------|----------|-----------|-----------|-----------|----------|
| 500 NA18860 | [2515685 chr13 | 13 | 25947233  | 25950398  | 3166   | 3   | 4.455825  | 0.19322  | 25946194  | 25948272  | 25949415  | 2595138  |
| 501 NA18860 | [2515685 chr13 | 13 | 31430484  | 31437209  | 6726   | 7   | -3.023348 | 0.104377 | 31430130  | 31430838  | 31436488  | 3143793  |
| 502 NA18860 | [2515685 chr13 | 13 | 33029564  | 33042392  | 12829  | 8   | 0.7553    | 0.059094 | 33000262  | 33034253  | 33041860  | 3304292  |
| 503 NA18860 | [2515685 chr13 | 13 | 53596297  | 53598631  | 2335   | 2   | -0.5986   | 0.108156 | 53595731  | 53596864  | 53598230  | 5359903  |
| 504 NA18860 | [2515685 chr13 | 13 | 56653890  | 56686136  | 32247  | 30  | -3.607083 | 0.057279 | 56650401  | 56657380  | 56655381  | 5668689  |
| 505 NA18860 | [2515685 chr13 | 13 | 56806981  | 56809760  | 2780   | 4   | -0.806056 | 0.072597 | 56806201  | 56807761  | 56809552  | 5680996  |
| 506 NA18860 | [2515685 chr13 | 13 | 64215510  | 64219701  | 4192   | 5   | -0.378602 | 0.072464 | 64214146  | 64216874  | 64219340  | 6422006  |
| 507 NA18860 | [2515685 chr13 | 13 | 69633905  | 69673289  | 39385  | 42  | 0.82574   | 0.024136 | 69633412  | 69634399  | 69672985  | 6967359  |
| 508 NA18860 | [2515685 chr13 | 13 | 82144102  | 82156983  | 12882  | 7   | -0.284289 | 0.053371 | 82143883  | 82144322  | 82156799  | 8215716  |
| 509 NA18860 | [2515685 chr13 | 13 | 84465792  | 84469972  | 4181   | 6   | -0.308788 | 0.059682 | 84465526  | 84466059  | 84469739  | 8447020  |
| 510 NA18860 | [2515685 chr13 | 13 | 113079647 | 113086827 | 7181   | 3   | 0.824971  | 0.087232 | 113078890 | 113080404 | 113082138 | 11309434 |
| 511 NA18860 | [2515685 chr14 | 14 | 18437470  | 18835653  | 398184 | 646 | -0.545062 | 0.003627 | 18437443  | 18437497  | 18835419  | 1883588  |
| 512 NA18860 | [2515685 chr14 | 14 | 18843500  | 19174829  | 331330 | 585 | -0.545062 | 0.003627 | 18841474  | 18845527  | 19174593  | 1917506  |
| 513 NA18860 | [2515685 chr14 | 14 | 19177839  | 19294435  | 116597 | 162 | -0.545062 | 0.003627 | 19177094  | 19178584  | 19294004  | 1929486  |
| 514 NA18860 | [2515685 chr14 | 14 | 19297147  | 19361396  | 64250  | 50  | -0.545062 | 0.003627 | 19296928  | 19297366  | 19361181  | 1936161  |
| 515 NA18860 | [2515685 chr14 | 14 | 19372204  | 19494842  | 122639 | 121 | -0.545062 | 0.003627 | 19367437  | 19377318  | 19494444  | 1949524  |
| 516 NA18860 | [2515685 chr14 | 14 | 19619347  | 19624801  | 5455   | 2   | 4.148183  | 0.259182 | 19612261  | 19624114  | 19624585  | 1962501  |
| 517 NA18860 | [2515685 chr14 | 14 | 20412037  | 20485011  | 72975  | 72  | 0.488245  | 0.017292 | 20411743  | 20412332  | 20484687  | 2048533  |
| 518 NA18860 | [2515685 chr14 | 14 | 20490539  | 20496053  | 5515   | 9   | 0.266163  | 0.05019  | 20490157  | 20490922  | 20495617  | 2049648  |
| 519 NA18860 | [2515685 chr14 | 14 | 23545942  | 23575428  | 29487  | 10  | 0.264163  | 0.043823 | 23545680  | 23546204  | 23575303  | 2357555  |
| 520 NA18860 | [2515685 chr14 | 14 | 42059344  | 42062997  | 3654   | 2   | 0.804226  | 0.118283 | 42056485  | 42062203  | 4206339   | 4206339  |
| 521 NA18860 | [2515685 chr14 | 14 | 47364376  | 47367966  | 3591   | 5   | -0.366864 | 0.06642  | 47364221  | 47364532  | 47366745  | 4736918  |
| 522 NA18860 | [2515685 chr14 | 14 | 73052083  | 73053781  | 1699   | 2   | -0.544191 | 0.086266 | 73051714  | 73052452  | 73052927  | 7305463  |
| 523 NA18860 | [2515685 chr14 | 14 | 73063171  | 73119729  | 56559  | 51  | 0.842503  | 0.021883 | 73061866  | 73064476  | 73118276  | 7312118  |
| 524 NA18860 | [2515685 chr14 | 14 | 77194461  | 77197185  | 2725   | 3   | 0.482967  | 0.086569 | 77194213  | 77194710  | 77196909  | 7719746  |
| 525 NA18860 | [2515685 chr14 | 14 | 80631947  | 80633603  | 1657   | 2   | -0.691431 | 0.123489 | 80631708  | 80632186  | 80633136  | 8063407  |
| 526 NA18860 | [2515685 chr14 | 14 | 97222759  | 97226243  | 3485   | 7   | -0.742245 | 0.054994 | 97222111  | 97223407  | 97225740  | 9722674  |
| 527 NA18860 | [2515685 chr14 | 14 | 104766812 | 104778505 | 11694  | 145 | 0.5158    | 0.011454 | 104766457 | 104767167 | 104778286 | 10477872 |
| 528 NA18860 | [2515685 chr15 | 15 | 18458940  | 18468372  | 9433   | 6   | -0.403774 | 0.056247 | 18458212  | 18459669  | 18467866  | 1846887  |
| 529 NA18860 | [2515685 chr15 | 15 | 19050771  | 19056269  | 5499   | 3   | -0.377711 | 0.070436 | 19048080  | 19053078  | 19056068  | 1905647  |
| 530 NA18860 | [2515685 chr15 | 15 | 19090947  | 19092178  | 1232   | 3   | -0.474151 | 0.083653 | 19090386  | 19091509  | 19091867  | 1909249  |
| 531 NA18860 | [2515685 chr15 | 15 | 19273931  | 19277474  | 3544   | 3   | -0.436441 | 0.081064 | 19273606  | 19274256  | 19276015  | 1927893  |
| 532 NA18860 | [2515685 chr15 | 15 | 19341230  | 19344811  | 3582   | 5   | -0.372711 | 0.068339 | 19340918  | 19341543  | 19344413  | 1934521  |
| 533 NA18860 | [2515685 chr15 | 15 | 19423414  | 19430979  | 7566   | 11  | -0.305323 | 0.042901 | 19422609  | 19424220  | 19430670  | 1943128  |
| 534 NA18860 | [2515685 chr15 | 15 | 19468608  | 19480237  | 11630  | 8   | -0.414871 | 0.046851 | 19468389  | 19468827  | 19479214  | 1948126  |
| 535 NA18860 | [2515685 chr15 | 15 | 19797016  | 19801971  | 4956   | 11  | -0.432866 | 0.042783 | 19796797  | 19797235  | 19801776  | 1980216  |
| 536 NA18860 | [2515685 chr15 | 15 | 19801971  | 19803624  | 1654   | 2   | 0.512323  | 0.101686 | 19801776  | 19802167  | 19803397  | 1980385  |
| 537 NA18860 | [2515685 chr15 | 15 | 19843267  | 19845597  | 2331   | 5   | 0.681879  | 0.064089 | 19843019  | 19843516  | 19845254  | 1984594  |
| 538 NA18860 | [2515685 chr15 | 15 | 19963910  | 20066800  | 102891 | 121 | 0.31259   | 0.013337 | 19963782  | 19964039  | 20066491  | 2006710  |
| 539 NA18860 | [2515685 chr15 | 15 | 20234328  | 20242111  | 7784   | 11  | -0.31299  | 0.041228 | 20233781  | 20234875  | 20241894  | 2024232  |
| 540 NA18860 | [2515685 chr15 | 15 | 20367533  | 20383831  | 16299  | 18  | -0.440404 | 0.032843 | 20367145  | 20367922  | 20383079  | 2038458  |
| 541 NA18860 | [2515685 chr15 | 15 | 21009583  | 21015599  | 6017   | 4   | -0.421839 | 0.06353  | 21006900  | 21011890  | 21015285  | 2101591  |
| 542 NA18860 | [2515685 chr15 | 15 | 21049779  | 21051009  | 1231   | 3   | -0.47415  | 0.083653 | 21049217  | 21050342  | 21050698  | 2105132  |
| 543 NA18860 | [2515685 chr15 | 15 | 21605983  | 21762765  | 156783 | 11  | 0.572797  | 0.04639  | 21605507  | 21606459  | 21760458  | 2179182  |
| 544 NA18860 | [2515685 chr15 | 15 | 21892356  | 21896364  | 4009   | 9   | -0.344444 | 0.048861 | 21892291  | 21892421  | 21896193  | 2189653  |
| 545 NA18860 | [2515685 chr15 | 15 | 22078029  | 22086266  | 8238   | 7   | -0.448878 | 0.058241 | 22077673  | 22078385  | 22085861  | 2208667  |
| 546 NA18860 | [2515685 chr15 | 15 | 22202537  | 22204201  | 1665   | 3   | -0.399518 | 0.079069 | 22202345  | 22202730  | 22204093  | 2220431  |
| 547 NA18860 | [2515685 chr15 | 15 | 22218143  | 22230954  | 12812  | 22  | -0.315596 | 0.017398 | 22218020  | 22218266  | 22230830  | 2223107  |
| 548 NA18860 | [2515685 chr15 | 15 | 22237721  | 22273082  | 35362  | 45  | -0.315596 | 0.017398 | 22237445  | 22237998  | 22272928  | 2227323  |
| 549 NA18860 | [2515685 chr15 | 15 | 22658272  | 22662234  | 3963   | 3   | -1.092735 | 0.095442 | 22658051  | 22658494  | 22659927  | 2266949  |
| 550 NA18860 | [2515685 chr15 | 15 | 24986053  | 24992250  | 6198   | 7   | 0.831288  | 0.062085 | 24985426  | 24986680  | 24991680  | 2499282  |
| 551 NA18860 | [2515685 chr15 | 15 | 26323692  | 26331811  | 8120   | 15  | -0.317468 | 0.036658 | 26323198  | 26324186  | 26331265  | 2633235  |
| 552 NA18860 | [2515685 chr15 | 15 | 26542764  | 26550607  | 7844   | 12  | -0.326034 | 0.040507 | 26542214  | 26543314  | 26549829  | 2655138  |
| 553 NA18860 | [2515685 chr15 | 15 | 27027114  | 27028336  | 1223   | 2   | -0.60286  | 0.120033 | 27026907  | 27027321  | 27028122  | 2702855  |
| 554 NA18860 | [2515685 chr15 | 15 | 27133610  | 27134889  | 1280   | 4   | 0.42735   | 0.074961 | 27133306  | 27133914  | 27134660  | 2713511  |

|             |                |    |           |           |        |     |           |          |           |           |           |           |
|-------------|----------------|----|-----------|-----------|--------|-----|-----------|----------|-----------|-----------|-----------|-----------|
| 555 NA18860 | [2515685 chr15 | 15 | 27688132  | 27690372  | 2241   | 3   | -1.137796 | 0.103265 | 27687785  | 27688480  | 27690197  | 27690547  |
| 556 NA18860 | [2515685 chr15 | 15 | 32489473  | 32495147  | 5675   | 6   | 0.450696  | 0.052578 | 32488638  | 32490308  | 32494339  | 32495951  |
| 557 NA18860 | [2515685 chr15 | 15 | 32635695  | 32641373  | 5679   | 7   | 0.460389  | 0.048387 | 32634860  | 32636530  | 32640565  | 32642187  |
| 558 NA18860 | [2515685 chr15 | 15 | 42905343  | 42906197  | 855    | 3   | -0.559069 | 0.079039 | 42905218  | 42905469  | 42905981  | 42906411  |
| 559 NA18860 | [2515685 chr15 | 15 | 43104933  | 43112272  | 7340   | 10  | 0.347118  | 0.045509 | 43104660  | 43105206  | 43112063  | 43112487  |
| 560 NA18860 | [2515685 chr15 | 15 | 43153369  | 43154013  | 645    | 2   | -0.578483 | 0.09824  | 43153155  | 43153584  | 43153678  | 43154344  |
| 561 NA18860 | [2515685 chr15 | 15 | 51686676  | 51871922  | 185247 | 3   | -0.415292 | 0.076269 | 51608297  | 51688983  | 51869615  | 51919907  |
| 562 NA18860 | [2515685 chr15 | 15 | 53021093  | 53031106  | 10014  | 5   | -0.461925 | 0.079658 | 53020920  | 53021266  | 53030995  | 53031217  |
| 563 NA18860 | [2515685 chr15 | 15 | 74671388  | 74682825  | 11438  | 9   | 0.950721  | 0.054759 | 74671122  | 74671654  | 74680518  | 74689511  |
| 564 NA18860 | [2515685 chr15 | 15 | 75117585  | 75119946  | 2362   | 4   | 1.051527  | 0.075625 | 75117343  | 75117827  | 75119741  | 75120157  |
| 565 NA18860 | [2515685 chr15 | 15 | 80431646  | 80473736  | 42091  | 37  | 0.292599  | 0.006338 | 80431274  | 80432018  | 80467907  | 80476047  |
| 566 NA18860 | [2515685 chr15 | 15 | 80509066  | 80850539  | 341474 | 293 | 0.292599  | 0.006338 | 80508242  | 80509891  | 80849830  | 80851244  |
| 567 NA18860 | [2515685 chr15 | 15 | 80895591  | 80982676  | 87086  | 86  | 0.292599  | 0.006338 | 80894767  | 80896416  | 80982275  | 80983071  |
| 568 NA18860 | [2515685 chr15 | 15 | 82608440  | 82862774  | 254335 | 113 | 0.385946  | 0.012611 | 82606549  | 82610331  | 82860467  | 82872157  |
| 569 NA18860 | [2515685 chr15 | 15 | 83528867  | 83581911  | 53045  | 66  | 0.423986  | 0.016311 | 83526988  | 83530747  | 83581731  | 83582097  |
| 570 NA18860 | [2515685 chr15 | 15 | 94382443  | 94384240  | 1798   | 2   | -0.820007 | 0.114998 | 94382013  | 94382874  | 94383668  | 94384811  |
| 571 NA18860 | [2515685 chr15 | 15 | 98234084  | 98240716  | 6633   | 8   | 0.860355  | 0.058341 | 98233842  | 98234327  | 98239350  | 98242087  |
| 572 NA18860 | [2515685 chr15 | 15 | 99453510  | 99455547  | 2038   | 3   | 0.878476  | 0.098211 | 99453160  | 99453860  | 99454156  | 99456931  |
| 573 NA18860 | [2515685 chr15 | 15 | 99465099  | 99472209  | 7111   | 7   | 0.290041  | 0.055417 | 99464839  | 99465360  | 99471883  | 99472531  |
| 574 NA18860 | [2515685 chr15 | 15 | 100109640 | 100122682 | 13043  | 98  | 0.270417  | 0.012504 | 100108905 | 100110376 | 100122315 | 100123057 |
| 575 NA18860 | [2515685 chr15 | 15 | 100202295 | 100203678 | 1384   | 2   | -0.555267 | 0.106437 | 100201879 | 100202712 | 100203405 | 100203957 |
| 576 NA18860 | [2515685 chr15 | 15 | 100266883 | 100337837 | 70955  | 63  | 0.522971  | 0.018159 | 100264210 | 100269190 | 100336759 | 100338917 |
| 577 NA18860 | [2515685 chr16 | 16 | 1681      | 11380     | 9700   | 9   | 0.352191  | 0.046775 | 1         | 3362      | 9494      | 13304     |
| 578 NA18860 | [2515685 chr16 | 16 | 70748     | 79607     | 8860   | 10  | 0.254577  | 0.047335 | 70368     | 71128     | 79255     | 7996C     |
| 579 NA18860 | [2515685 chr16 | 16 | 321319    | 325633    | 4315   | 2   | 0.557138  | 0.107731 | 320390    | 322248    | 324905    | 326361    |
| 580 NA18860 | [2515685 chr16 | 16 | 847093    | 851326    | 4234   | 8   | -0.329378 | 0.054858 | 846662    | 847525    | 849440    | 857236    |
| 581 NA18860 | [2515685 chr16 | 16 | 12550392  | 12555215  | 4824   | 5   | -0.344834 | 0.066252 | 12549915  | 12550869  | 12554759  | 12555677  |
| 582 NA18860 | [2515685 chr16 | 16 | 12563891  | 12565579  | 1689   | 2   | -1.155057 | 0.108786 | 12563523  | 12564260  | 12565191  | 12565961  |
| 583 NA18860 | [2515685 chr16 | 16 | 14699043  | 14703775  | 4733   | 4   | 0.685396  | 0.060999 | 14696316  | 14700929  | 14703313  | 14704237  |
| 584 NA18860 | [2515685 chr16 | 16 | 14738161  | 14742897  | 4737   | 4   | 0.685397  | 0.060999 | 14735434  | 14740047  | 14742435  | 14743351  |
| 585 NA18860 | [2515685 chr16 | 16 | 14955818  | 15030359  | 74542  | 68  | -0.275912 | 0.017762 | 14955356  | 14956281  | 15029969  | 15030751  |
| 586 NA18860 | [2515685 chr16 | 16 | 16633469  | 16639120  | 5652   | 4   | 0.845496  | 0.076219 | 16632502  | 16634437  | 16638386  | 16639857  |
| 587 NA18860 | [2515685 chr16 | 16 | 18662305  | 18663274  | 970    | 2   | -0.514587 | 0.101589 | 18661835  | 18662775  | 18663226  | 18663327  |
| 588 NA18860 | [2515685 chr16 | 16 | 21419985  | 21502620  | 82636  | 79  | 0.258613  | 0.015739 | 21419938  | 21420033  | 21501101  | 21504144  |
| 589 NA18860 | [2515685 chr16 | 16 | 22292423  | 22293972  | 1550   | 3   | 0.406256  | 0.07549  | 22292157  | 22292689  | 22293590  | 22294351  |
| 590 NA18860 | [2515685 chr16 | 16 | 22458848  | 22618743  | 159896 | 146 | 0.276682  | 0.01167  | 22457280  | 22460417  | 22617181  | 22620301  |
| 591 NA18860 | [2515685 chr16 | 16 | 28043837  | 28044899  | 1063   | 2   | 0.593563  | 0.108937 | 28043576  | 28044099  | 28044675  | 28045127  |
| 592 NA18860 | [2515685 chr16 | 16 | 28324617  | 28333786  | 9170   | 9   | -0.44247  | 0.050477 | 28324569  | 28324665  | 28333382  | 28334191  |
| 593 NA18860 | [2515685 chr16 | 16 | 28517711  | 28534880  | 17170  | 24  | 0.310706  | 0.027081 | 28516970  | 28518453  | 28534189  | 28535577  |
| 594 NA18860 | [2515685 chr16 | 16 | 28617225  | 28628077  | 10853  | 10  | -0.403849 | 0.047037 | 28615757  | 28618694  | 28627777  | 28628377  |
| 595 NA18860 | [2515685 chr16 | 16 | 29370329  | 29394981  | 24653  | 33  | 0.26695   | 0.021676 | 29370019  | 29370639  | 29394091  | 29395877  |
| 596 NA18860 | [2515685 chr16 | 16 | 30109671  | 30134324  | 24654  | 32  | 0.263195  | 0.022027 | 30109361  | 30109981  | 30133435  | 30135217  |
| 597 NA18860 | [2515685 chr16 | 16 | 32159898  | 32160377  | 480    | 2   | -1.514115 | 0.102742 | 32159453  | 32160343  | 32160346  | 32160401  |
| 598 NA18860 | [2515685 chr16 | 16 | 32203459  | 32219640  | 16182  | 30  | 0.296088  | 0.023985 | 32200681  | 32205345  | 32219531  | 32219747  |
| 599 NA18860 | [2515685 chr16 | 16 | 32479451  | 32553240  | 73790  | 75  | 0.277549  | 0.016904 | 32400448  | 32481337  | 32553051  | 32553431  |
| 600 NA18860 | [2515685 chr16 | 16 | 32606692  | 32607163  | 472    | 2   | -1.514066 | 0.10274  | 32606661  | 32606724  | 32606727  | 32607597  |
| 601 NA18860 | [2515685 chr16 | 16 | 33100875  | 33101346  | 472    | 2   | -1.514062 | 0.10274  | 33100438  | 33101312  | 33101315  | 33101377  |
| 602 NA18860 | [2515685 chr16 | 16 | 33157406  | 33157879  | 474    | 2   | -1.514065 | 0.10274  | 33156967  | 33157845  | 33157848  | 33157911  |
| 603 NA18860 | [2515685 chr16 | 16 | 33201513  | 33217055  | 15543  | 28  | 0.300629  | 0.025175 | 33197841  | 33203399  | 33216946  | 33217167  |
| 604 NA18860 | [2515685 chr16 | 16 | 33394220  | 33397742  | 3523   | 7   | 0.347241  | 0.053336 | 33394077  | 33394363  | 33397495  | 33397991  |
| 605 NA18860 | [2515685 chr16 | 16 | 33433263  | 33448466  | 15204  | 29  | 0.353958  | 0.026537 | 33433086  | 33433441  | 33447836  | 33449091  |
| 606 NA18860 | [2515685 chr16 | 16 | 34321820  | 34342005  | 20186  | 31  | -0.48344  | 0.008306 | 34317185  | 34323706  | 34341760  | 34342251  |
| 607 NA18860 | [2515685 chr16 | 16 | 34343871  | 34597593  | 253723 | 275 | -0.48344  | 0.008306 | 34343515  | 34344228  | 34597356  | 34597837  |
| 608 NA18860 | [2515685 chr16 | 16 | 34599738  | 34609079  | 9342   | 7   | -0.48344  | 0.008306 | 34599558  | 34599918  | 34607193  | 34617321  |
| 609 NA18860 | [2515685 chr16 | 16 | 51899270  | 51900258  | 989    | 2   | -0.559261 | 0.099904 | 51899072  | 51899468  | 51899991  | 51900527  |

|             |                |    |          |          |        |     |           |          |          |          |          |          |
|-------------|----------------|----|----------|----------|--------|-----|-----------|----------|----------|----------|----------|----------|
| 610 NA18860 | [2515685 chr16 | 16 | 57204541 | 57207585 | 3045   | 3   | 5.194531  | 0.213809 | 57204170 | 57204913 | 57206938 | 5720823: |
| 611 NA18860 | [2515685 chr16 | 16 | 70647868 | 70668660 | 20793  | 14  | 0.852423  | 0.042753 | 70647656 | 70648081 | 70668127 | 7066919: |
| 612 NA18860 | [2515685 chr16 | 16 | 74094809 | 74132994 | 38186  | 42  | 0.462454  | 0.023617 | 74093624 | 74095995 | 74132305 | 7413368: |
| 613 NA18860 | [2515685 chr16 | 16 | 76928915 | 76942282 | 13368  | 10  | -1.63331  | 0.066528 | 76928609 | 76929221 | 76941602 | 7694296: |
| 614 NA18860 | [2515685 chr16 | 16 | 79534557 | 79540634 | 6078   | 8   | -0.835224 | 0.056219 | 79532411 | 79536443 | 79540299 | 7954097: |
| 615 NA18860 | [2515685 chr16 | 16 | 83994929 | 84004171 | 9243   | 81  | -0.614139 | 0.014734 | 83994558 | 83995300 | 84003767 | 8400457: |
| 616 NA18860 | [2515685 chr16 | 16 | 84562720 | 84565235 | 2516   | 11  | 0.36592   | 0.046843 | 84561685 | 84563756 | 84565142 | 8456532: |
| 617 NA18860 | [2515685 chr17 | 17 | 966845   | 969578   | 2734   | 21  | 0.43617   | 0.034257 | 966537   | 967154   | 969378   | 969775:  |
| 618 NA18860 | [2515685 chr17 | 17 | 16662933 | 16665630 | 2698   | 5   | -0.619526 | 0.067363 | 16662626 | 16663241 | 16665353 | 1666590: |
| 619 NA18860 | [2515685 chr17 | 17 | 17123642 | 17127198 | 3557   | 4   | 0.46769   | 0.073527 | 17123302 | 17123983 | 17126001 | 1712839: |
| 620 NA18860 | [2515685 chr17 | 17 | 17564314 | 17569258 | 4945   | 8   | 0.289176  | 0.053627 | 17563922 | 17564707 | 17569002 | 1756951: |
| 621 NA18860 | [2515685 chr17 | 17 | 18233917 | 19069357 | 835441 | 766 | 0.253282  | 0.005108 | 18233618 | 18234217 | 19069213 | 1906950: |
| 622 NA18860 | [2515685 chr17 | 17 | 20286198 | 20371943 | 85746  | 154 | 0.268129  | 0.010367 | 20286103 | 20286294 | 20371308 | 2037257: |
| 623 NA18860 | [2515685 chr17 | 17 | 20380987 | 20397629 | 16643  | 27  | 0.268129  | 0.010367 | 20380721 | 20381253 | 20397532 | 2039772: |
| 624 NA18860 | [2515685 chr17 | 17 | 20541881 | 20546522 | 4642   | 8   | 0.314941  | 0.052739 | 20541489 | 20542273 | 20545554 | 2054749: |
| 625 NA18860 | [2515685 chr17 | 17 | 20571353 | 20578410 | 7058   | 6   | 0.451758  | 0.060587 | 20571124 | 20571582 | 20577452 | 2057936: |
| 626 NA18860 | [2515685 chr17 | 17 | 20644041 | 20648732 | 4692   | 4   | 0.460337  | 0.071906 | 20643647 | 20644435 | 20647744 | 2064972: |
| 627 NA18860 | [2515685 chr17 | 17 | 21415027 | 21418282 | 3256   | 2   | 1.007971  | 0.123503 | 21410935 | 21417234 | 21417641 | 2141892: |
| 628 NA18860 | [2515685 chr17 | 17 | 21826349 | 21834752 | 8404   | 7   | 0.964644  | 0.049781 | 21826238 | 21826461 | 21833710 | 2183579: |
| 629 NA18860 | [2515685 chr17 | 17 | 21942843 | 21954469 | 11627  | 19  | -0.255095 | 0.032363 | 21942618 | 21943068 | 21954310 | 2195462: |
| 630 NA18860 | [2515685 chr17 | 17 | 27465650 | 27470835 | 5186   | 6   | 0.302065  | 0.0602   | 27465328 | 27465972 | 27469974 | 2747169: |
| 631 NA18860 | [2515685 chr17 | 17 | 31430406 | 31431441 | 1036   | 2   | 1.548172  | 0.132087 | 31429658 | 31431155 | 31431198 | 3143168: |
| 632 NA18860 | [2515685 chr17 | 17 | 31433320 | 31436159 | 2840   | 4   | 0.739516  | 0.083421 | 31432843 | 31433797 | 31435811 | 3143650: |
| 633 NA18860 | [2515685 chr17 | 17 | 31437744 | 31888495 | 450752 | 626 | 0.908696  | 0.005508 | 31437542 | 31437946 | 31888204 | 3188878: |
| 634 NA18860 | [2515685 chr17 | 17 | 32829500 | 32833231 | 3732   | 5   | 0.963562  | 0.077557 | 32828825 | 32830175 | 32832670 | 3283379: |
| 635 NA18860 | [2515685 chr17 | 17 | 33288815 | 33289544 | 730    | 3   | 0.70441   | 0.084685 | 33288407 | 33289224 | 33289524 | 3328956: |
| 636 NA18860 | [2515685 chr17 | 17 | 33324385 | 33639547 | 315163 | 414 | 0.909159  | 0.006927 | 33323841 | 33324930 | 33638405 | 3364068: |
| 637 NA18860 | [2515685 chr17 | 17 | 33641281 | 33659558 | 18278  | 30  | 0.415778  | 0.027033 | 33640689 | 33641874 | 33658997 | 3366011: |
| 638 NA18860 | [2515685 chr17 | 17 | 36646378 | 36649001 | 2624   | 2   | -0.670215 | 0.091995 | 36645905 | 36646851 | 36648704 | 3664929: |
| 639 NA18860 | [2515685 chr17 | 17 | 36664666 | 36667640 | 2975   | 3   | -0.461237 | 0.085502 | 36664437 | 36664896 | 36664684 | 3666879: |
| 640 NA18860 | [2515685 chr17 | 17 | 36675530 | 36685343 | 9814   | 10  | -2.697222 | 0.081022 | 36675011 | 36676049 | 36684647 | 3668604: |
| 641 NA18860 | [2515685 chr17 | 17 | 36760802 | 36779372 | 18571  | 20  | -0.798499 | 0.037923 | 36760010 | 36761595 | 36779070 | 3677967: |
| 642 NA18860 | [2515685 chr17 | 17 | 36785682 | 36793113 | 7432   | 8   | 0.608044  | 0.057883 | 36785202 | 36786162 | 36792578 | 3679364: |
| 643 NA18860 | [2515685 chr17 | 17 | 36993884 | 36995674 | 1791   | 2   | -0.717846 | 0.098078 | 36993311 | 36994458 | 36995333 | 3699601: |
| 644 NA18860 | [2515685 chr17 | 17 | 42970703 | 42988804 | 18102  | 32  | 0.397401  | 0.025909 | 42970185 | 42971221 | 42988208 | 4298940: |
| 645 NA18860 | [2515685 chr17 | 17 | 42988804 | 43026670 | 37867  | 53  | 1.320079  | 0.023249 | 42988208 | 42989400 | 43025568 | 4302777: |
| 646 NA18860 | [2515685 chr17 | 17 | 55368842 | 55373076 | 4235   | 6   | 0.635245  | 0.06391  | 55368278 | 55369406 | 55372757 | 5537339: |
| 647 NA18860 | [2515685 chr17 | 17 | 55434888 | 55452955 | 18068  | 34  | 0.77857   | 0.024427 | 55434445 | 55435332 | 55452577 | 5545333: |
| 648 NA18860 | [2515685 chr17 | 17 | 55457995 | 55459798 | 1804   | 2   | 0.906125  | 0.109564 | 55457669 | 55458322 | 55459168 | 5546042: |
| 649 NA18860 | [2515685 chr17 | 17 | 55550803 | 55552834 | 2032   | 2   | 0.906125  | 0.109564 | 55549945 | 55551662 | 55552508 | 5555316: |
| 650 NA18860 | [2515685 chr17 | 17 | 57652724 | 57667804 | 15081  | 18  | 0.580487  | 0.033642 | 57652052 | 57653396 | 57667259 | 5766834: |
| 651 NA18860 | [2515685 chr17 | 17 | 57681793 | 57708812 | 27020  | 57  | 0.888248  | 0.019241 | 57680114 | 57683473 | 57708467 | 5770915: |
| 652 NA18860 | [2515685 chr17 | 17 | 75019369 | 75020755 | 1387   | 3   | -0.649148 | 0.070436 | 75019115 | 75019623 | 75020523 | 7502098: |
| 653 NA18860 | [2515685 chr17 | 17 | 75223639 | 75225100 | 1462   | 4   | -0.675866 | 0.060999 | 75223385 | 75223893 | 75224893 | 7522530: |
| 654 NA18860 | [2515685 chr18 | 18 | 12386896 | 12388854 | 1959   | 2   | 0.654144  | 0.090331 | 12386442 | 12387350 | 12388203 | 1238950: |
| 655 NA18860 | [2515685 chr18 | 18 | 14246928 | 14322605 | 75678  | 22  | 0.374517  | 0.030396 | 14244529 | 14249327 | 14320558 | 1432465: |
| 656 NA18860 | [2515685 chr18 | 18 | 28142218 | 28143399 | 1182   | 2   | 0.747026  | 0.11951  | 28141854 | 28142583 | 28143055 | 2814374: |
| 657 NA18860 | [2515685 chr18 | 18 | 32294096 | 32297679 | 3584   | 2   | -0.583355 | 0.108187 | 32292885 | 32295307 | 32297037 | 3229832: |
| 658 NA18860 | [2515685 chr18 | 18 | 42791931 | 42815392 | 23462  | 23  | 0.409865  | 0.028427 | 42749992 | 42796523 | 42810800 | 4288915: |
| 659 NA18860 | [2515685 chr18 | 18 | 61917747 | 61920171 | 2425   | 4   | 3.25      | 0.147492 | 61917522 | 61917973 | 61919646 | 6192069: |
| 660 NA18860 | [2515685 chr18 | 18 | 64308250 | 64309811 | 1562   | 2   | -0.878388 | 0.148197 | 64307579 | 64308922 | 64309411 | 6431021: |
| 661 NA18860 | [2515685 chr18 | 18 | 74230393 | 74234275 | 3883   | 31  | -0.345304 | 0.022308 | 74229835 | 74230952 | 74234139 | 7423441: |
| 662 NA18860 | [2515685 chr18 | 18 | 74392800 | 74397377 | 4578   | 3   | 0.656377  | 0.09624  | 74390826 | 74394774 | 74396965 | 7439779: |
| 663 NA18860 | [2515685 chr19 | 19 | 14054    | 75797    | 61744  | 60  | 0.593563  | 0.018737 | 13672    | 14437    | 73262    | 79306    |
| 664 NA18860 | [2515685 chr19 | 19 | 114218   | 114660   | 443    | 2   | 0.746717  | 0.116055 | 113842   | 114595   | 114595   | 114725   |

|             |                |    |          |          |         |     |           |          |          |          |          |          |
|-------------|----------------|----|----------|----------|---------|-----|-----------|----------|----------|----------|----------|----------|
| 665 NA18860 | [2515685 chr19 | 19 | 310414   | 314479   | 4066    | 15  | -0.750818 | 0.037586 | 309687   | 311142   | 312994   | 315964   |
| 666 NA18860 | [2515685 chr19 | 19 | 8243623  | 8272250  | 28628   | 16  | 0.435541  | 0.033173 | 8242830  | 8244417  | 8271784  | 8272717  |
| 667 NA18860 | [2515685 chr19 | 19 | 15639934 | 15694633 | 54700   | 51  | 0.495131  | 0.020266 | 15639244 | 15640625 | 15694434 | 15694831 |
| 668 NA18860 | [2515685 chr19 | 19 | 22931042 | 22934759 | 3718    | 3   | 1.211797  | 0.111208 | 22918199 | 22933577 | 22934546 | 22934971 |
| 669 NA18860 | [2515685 chr19 | 19 | 23007896 | 23014812 | 6917    | 7   | 0.622421  | 0.061193 | 22990964 | 23010431 | 23014157 | 23015461 |
| 670 NA18860 | [2515685 chr19 | 19 | 23597182 | 23600235 | 3054    | 5   | -0.831677 | 0.069003 | 23596541 | 23597823 | 23599600 | 23600871 |
| 671 NA18860 | [2515685 chr19 | 19 | 39419234 | 39422498 | 3265    | 5   | 0.581067  | 0.070592 | 39418853 | 39419616 | 39421681 | 39423311 |
| 672 NA18860 | [2515685 chr19 | 19 | 41450179 | 41493620 | 43442   | 28  | 0.687821  | 0.026022 | 41421528 | 41452714 | 41491085 | 41497851 |
| 673 NA18860 | [2515685 chr19 | 19 | 41532761 | 41540854 | 8094    | 2   | 0.694734  | 0.114581 | 41532090 | 41533433 | 41538691 | 41543017 |
| 674 NA18860 | [2515685 chr19 | 19 | 42450465 | 42487512 | 37048   | 33  | 0.711235  | 0.023376 | 42413600 | 42453000 | 42486487 | 42488531 |
| 675 NA18860 | [2515685 chr19 | 19 | 49584862 | 49631297 | 46436   | 44  | -0.506288 | 0.023189 | 49584601 | 49585124 | 49630732 | 49631861 |
| 676 NA18860 | [2515685 chr19 | 19 | 56795291 | 56798382 | 3092    | 6   | 0.319092  | 0.057875 | 56794910 | 56795672 | 56797932 | 56798831 |
| 677 NA18860 | [2515685 chr19 | 19 | 56826070 | 56840752 | 14683   | 14  | -0.68158  | 0.04026  | 56825810 | 56826331 | 56840372 | 56841131 |
| 678 NA18860 | [2515685 chr19 | 19 | 58210435 | 58244458 | 34024   | 26  | -0.790774 | 0.030515 | 58209863 | 58211007 | 58243893 | 58245021 |
| 679 NA18860 | [2515685 chr19 | 19 | 59247755 | 59252981 | 5227    | 6   | 0.85289   | 0.064978 | 59246427 | 59249084 | 59252269 | 59253691 |
| 680 NA18860 | [2515685 chr19 | 19 | 59422281 | 59435274 | 12994   | 15  | -0.64642  | 0.039488 | 59421840 | 59422722 | 59435027 | 59435521 |
| 681 NA18860 | [2515685 chr19 | 19 | 59492384 | 59498950 | 6567    | 7   | 0.49106   | 0.055803 | 59491977 | 59492791 | 59497077 | 59500821 |
| 682 NA18860 | [2515685 chr19 | 19 | 59952968 | 59955569 | 2602    | 3   | -0.395937 | 0.077756 | 59952712 | 59953225 | 59954819 | 59956321 |
| 683 NA18860 | [2515685 chr19 | 19 | 60166764 | 60170745 | 3982    | 2   | 0.638962  | 0.086266 | 60165407 | 60168121 | 60169211 | 60172271 |
| 684 NA18860 | [2515685 chr19 | 19 | 60960299 | 60962124 | 1826    | 2   | -0.631946 | 0.105592 | 60959907 | 60960691 | 60961727 | 60962521 |
| 685 NA18860 | [2515685 chr20 | 20 | 1511097  | 1532477  | 21381   | 26  | -2.283052 | 0.047451 | 1510534  | 1511660  | 1532182  | 15327731 |
| 686 NA18860 | [2515685 chr20 | 20 | 15249645 | 15251805 | 2161    | 2   | -0.70299  | 0.102615 | 15249381 | 15249909 | 15251287 | 15252321 |
| 687 NA18860 | [2515685 chr20 | 20 | 23904391 | 23982762 | 78372   | 10  | 0.289534  | 0.043196 | 23887613 | 23907810 | 23979343 | 24071241 |
| 688 NA18860 | [2515685 chr20 | 20 | 25785997 | 25799175 | 13179   | 9   | 0.319628  | 0.048307 | 25785759 | 25786235 | 25798661 | 25799681 |
| 689 NA18860 | [2515685 chr20 | 20 | 26136817 | 26138192 | 1376    | 3   | 0.547584  | 0.092016 | 26136626 | 26137008 | 26137783 | 26138601 |
| 690 NA18860 | [2515685 chr20 | 20 | 59951513 | 59957050 | 5538    | 18  | 0.877461  | 0.035113 | 59950681 | 59952345 | 59956538 | 59957561 |
| 691 NA18860 | [2515685 chr20 | 20 | 62066380 | 62068214 | 1835    | 8   | 1.362889  | 0.059457 | 62066146 | 62066615 | 62067671 | 62068751 |
| 692 NA18860 | [2515685 chr20 | 20 | 62113559 | 62121334 | 7776    | 22  | -0.273433 | 0.032186 | 62113491 | 62113628 | 62120828 | 62121841 |
| 693 NA18860 | [2515685 chr20 | 20 | 62233505 | 62235897 | 2393    | 4   | 0.582374  | 0.061897 | 62232847 | 62234163 | 62235101 | 62236691 |
| 694 NA18860 | [2515685 chr20 | 20 | 62275204 | 62278261 | 3058    | 35  | 0.275476  | 0.026121 | 62274903 | 62275506 | 62278223 | 62278291 |
| 695 NA18860 | [2515685 chr21 | 21 | 10053781 | 10076005 | 22225   | 27  | 0.291264  | 0.028482 | 10053078 | 10054484 | 10075742 | 10076261 |
| 696 NA18860 | [2515685 chr21 | 21 | 10111093 | 10112867 | 1775    | 2   | 0.555161  | 0.091501 | 10110744 | 10111443 | 10112615 | 10113121 |
| 697 NA18860 | [2515685 chr21 | 21 | 13961915 | 13968799 | 6885    | 6   | -0.44984  | 0.057447 | 13961738 | 13962093 | 13967342 | 13970251 |
| 698 NA18860 | [2515685 chr21 | 21 | 13976132 | 13980758 | 4627    | 10  | -0.366123 | 0.044962 | 13975943 | 13976322 | 13980622 | 13980891 |
| 699 NA18860 | [2515685 chr21 | 21 | 14150623 | 14197493 | 46871   | 16  | 0.321635  | 0.03489  | 14145265 | 14155981 | 14194870 | 14200111 |
| 700 NA18860 | [2515685 chr21 | 21 | 14210929 | 14212208 | 1280    | 2   | -0.566652 | 0.108327 | 14210702 | 14211156 | 14211604 | 14212811 |
| 701 NA18860 | [2515685 chr22 | 22 | 14474806 | 14777885 | 303080  | 568 | -0.564493 | 0.005562 | 14474622 | 14474991 | 14777603 | 14778161 |
| 702 NA18860 | [2515685 chr22 | 22 | 14781127 | 14830910 | 49784   | 91  | -0.564493 | 0.005562 | 14780580 | 14781674 | 14830451 | 14831361 |
| 703 NA18860 | [2515685 chr22 | 22 | 16993668 | 16998345 | 4678    | 3   | 0.463337  | 0.081363 | 16993305 | 16994031 | 16995658 | 17001721 |
| 704 NA18860 | [2515685 chr22 | 22 | 17032140 | 17361026 | 328887  | 457 | 0.274503  | 0.00334  | 17031480 | 17032801 | 17360659 | 17361391 |
| 705 NA18860 | [2515685 chr22 | 22 | 17393232 | 19380073 | 1986842 | 921 | 0.274503  | 0.00334  | 17392823 | 17393642 | 19377752 | 19382391 |
| 706 NA18860 | [2515685 chr22 | 22 | 19789638 | 20027144 | 237507  | 366 | 0.274503  | 0.00334  | 19788642 | 19790634 | 20024457 | 20031461 |
| 707 NA18860 | [2515685 chr22 | 22 | 20082771 | 20095586 | 12816   | 15  | -0.29846  | 0.036389 | 20082396 | 20083147 | 20095331 | 20095841 |
| 708 NA18860 | [2515685 chr22 | 22 | 20103653 | 20114481 | 10829   | 16  | -0.312193 | 0.037866 | 20103239 | 20104067 | 20114449 | 20114511 |
| 709 NA18860 | [2515685 chr22 | 22 | 20137248 | 20146413 | 9166    | 7   | -0.424334 | 0.052804 | 20136561 | 20137935 | 20146100 | 20146721 |
| 710 NA18860 | [2515685 chr22 | 22 | 20178068 | 20188917 | 10850   | 14  | -0.350535 | 0.04092  | 20178036 | 20178100 | 20188500 | 20189331 |
| 711 NA18860 | [2515685 chr22 | 22 | 20196985 | 20209861 | 12877   | 16  | -0.306386 | 0.035421 | 20196730 | 20197241 | 20209409 | 20210311 |
| 712 NA18860 | [2515685 chr22 | 22 | 21965059 | 22246289 | 281231  | 23  | 0.341202  | 0.029578 | 21887885 | 21967746 | 22244966 | 22247611 |
| 713 NA18860 | [2515685 chr22 | 22 | 22667089 | 22672624 | 5536    | 9   | 0.298275  | 0.049499 | 22666536 | 22667642 | 22672391 | 22672851 |
| 714 NA18860 | [2515685 chr22 | 22 | 22672624 | 22720154 | 47531   | 49  | 0.929167  | 0.02569  | 22672391 | 22672858 | 22719882 | 22720421 |
| 715 NA18860 | [2515685 chr22 | 22 | 22721179 | 22729265 | 8087    | 11  | 0.315931  | 0.042867 | 22720466 | 22721893 | 22728912 | 22729611 |
| 716 NA18860 | [2515685 chr22 | 22 | 22974129 | 22987889 | 13761   | 21  | 0.432004  | 0.030467 | 22973706 | 22974552 | 22987448 | 22988331 |
| 717 NA18860 | [2515685 chr22 | 22 | 22995064 | 22999917 | 4854    | 10  | 0.437068  | 0.04866  | 22994927 | 22995201 | 22999409 | 23000421 |
| 718 NA18860 | [2515685 chr22 | 22 | 23246076 | 23377449 | 131374  | 37  | 0.387026  | 0.022892 | 23186178 | 23248763 | 23377256 | 23377641 |
| 719 NA18860 | [2515685 chr22 | 22 | 33619409 | 33623490 | 4082    | 5   | 0.846204  | 0.070733 | 33618939 | 33619879 | 33622642 | 33624331 |



|             |                |    |           |           |        |     |           |          |           |           |           |           |
|-------------|----------------|----|-----------|-----------|--------|-----|-----------|----------|-----------|-----------|-----------|-----------|
| 720 NA18860 | [2515685 chr22 | 22 | 41167383  | 41169297  | 1915   | 3   | 0.495683  | 0.089521 | 41166629  | 41168137  | 41169076  | 41169511  |
| 721 NA18860 | [2515685 chr22 | 22 | 41200188  | 41203811  | 3624   | 3   | 0.455784  | 0.085587 | 41198644  | 41201733  | 41203612  | 41204011  |
| 722 NA18860 | [2515685 chr22 | 22 | 41214550  | 41279753  | 65204  | 55  | 0.460888  | 0.015597 | 41213953  | 41215148  | 41278713  | 41280791  |
| 723 NA18860 | [2515685 chr22 | 22 | 41287018  | 41305837  | 18820  | 21  | 0.460888  | 0.015597 | 41286777  | 41287259  | 41305603  | 41306071  |
| 724 NA18860 | [2515685 chr22 | 22 | 42706781  | 42709484  | 2704   | 2   | -0.66314  | 0.11561  | 42705739  | 42707823  | 42709129  | 42709841  |
| 725 NA18860 | [2515685 chr22 | 22 | 43455661  | 43456925  | 1265   | 2   | -1.09164  | 0.121191 | 43455369  | 43455954  | 43456505  | 43457341  |
| 726 NA18860 | [2515685 chrX  | 23 | 655376    | 657388    | 2013   | 4   | -0.514194 | 0.078169 | 655166    | 655586    | 656091    | 658686    |
| 727 NA18860 | [2515685 chrX  | 23 | 1979394   | 1983878   | 4485   | 15  | 0.935731  | 0.039388 | 1979134   | 1979654   | 1982685   | 1985071   |
| 728 NA18860 | [2515685 chrX  | 23 | 2286200   | 2288297   | 2098   | 2   | 0.797648  | 0.095146 | 2285671   | 2286730   | 2287550   | 2289041   |
| 729 NA18860 | [2515685 chrX  | 23 | 9182407   | 9192056   | 9650   | 13  | 0.40871   | 0.040147 | 9181838   | 9182977   | 9191527   | 9192581   |
| 730 NA18860 | [2515685 chrX  | 23 | 14577141  | 14808841  | 231701 | 4   | -0.352411 | 0.063562 | 14508517  | 14581123  | 14804859  | 14951431  |
| 731 NA18860 | [2515685 chrX  | 23 | 28243005  | 28245559  | 2555   | 3   | 0.491604  | 0.089708 | 28242771  | 28243240  | 28245386  | 28245731  |
| 732 NA18860 | [2515685 chrX  | 23 | 48909988  | 49070156  | 160169 | 120 | 0.316962  | 0.011724 | 48906199  | 48913778  | 49070073  | 49070231  |
| 733 NA18860 | [2515685 chrX  | 23 | 56677475  | 56690665  | 13191  | 31  | 0.959828  | 0.022473 | 56677130  | 56677820  | 56690311  | 56691011  |
| 734 NA18860 | [2515685 chrX  | 23 | 66439906  | 66442209  | 2304   | 2   | -0.660089 | 0.120935 | 66439794  | 66440019  | 66441950  | 66442461  |
| 735 NA18860 | [2515685 chrX  | 23 | 70741274  | 70745998  | 4725   | 38  | 2.802907  | 0.039823 | 70739871  | 70742677  | 70744597  | 70747401  |
| 736 NA18860 | [2515685 chrX  | 23 | 105478359 | 105479862 | 1504   | 2   | -0.645252 | 0.099542 | 105477870 | 105478848 | 105479594 | 10548013  |
| 737 NA18860 | [2515685 chrX  | 23 | 115742134 | 115742474 | 341    | 2   | -0.670055 | 0.098899 | 115742036 | 115742232 | 115742386 | 11574256  |
| 738 NA18860 | [2515685 chrX  | 23 | 118816240 | 118840552 | 24313  | 27  | 1.252872  | 0.032613 | 118815752 | 118816729 | 118840046 | 118841051 |
| 739 NA18860 | [2515685 chrX  | 23 | 134569408 | 134625407 | 56000  | 104 | 0.404197  | 0.008842 | 134569294 | 134569522 | 134624877 | 13462593  |
| 740 NA18860 | [2515685 chrX  | 23 | 134645810 | 134698023 | 52214  | 106 | 0.404197  | 0.008842 | 134645280 | 134646341 | 134696803 | 13469924  |
| 741 NA18860 | [2515685 chrX  | 23 | 134750696 | 134755274 | 4579   | 10  | 0.306234  | 0.042983 | 134750516 | 134750876 | 134755112 | 13475543  |
| 742 NA18860 | [2515685 chrX  | 23 | 139806116 | 139842391 | 36276  | 47  | 0.299394  | 0.018576 | 139802399 | 139809834 | 139842274 | 13984250  |
| 743 NA18860 | [2515685 chrX  | 23 | 140051433 | 140066718 | 15286  | 26  | 0.290676  | 0.025371 | 140043259 | 140055415 | 140062736 | 14007331  |
| 744 NA18860 | [2515685 chrX  | 23 | 140378279 | 140413881 | 35603  | 49  | 0.323053  | 0.018374 | 140378162 | 140378397 | 140411067 | 14041669  |
| 745 NA18860 | [2515685 chrX  | 23 | 140500446 | 140513745 | 13300  | 25  | 0.288729  | 0.02633  | 140492162 | 140504428 | 140512707 | 14051478  |
| 746 NA18860 | [2515685 chrX  | 23 | 146066383 | 146073685 | 7303   | 18  | -0.442186 | 0.033415 | 146066116 | 146066650 | 146073504 | 14607386  |
| 747 NA18860 | [2515685 chrX  | 23 | 154653800 | 154656039 | 2240   | 2   | -0.937196 | 0.113782 | 154652741 | 154654860 | 154655183 | 15465689  |
| 748 NA18860 | [2515685 chrX  | 23 | 154721706 | 154722677 | 972    | 2   | 0.810664  | 0.11738  | 154721235 | 154722178 | 154722342 | 15472301  |
| 749 NA18860 | [2515685 chrX  | 23 | 154811716 | 154822878 | 11163  | 10  | 0.43297   | 0.044788 | 154809810 | 154813623 | 154821492 | 15482426  |
| 750 NA18860 | [2515685 chrY  | 24 | 655376    | 657388    | 2013   | 4   | -0.514199 | 0.078169 | 655166    | 655586    | 656091    | 658686    |
| 751 NA18860 | [2515685 chrY  | 24 | 1979394   | 1983878   | 4485   | 15  | 0.935731  | 0.039388 | 1979134   | 1979654   | 1982685   | 1985071   |
| 752 NA18860 | [2515685 chrY  | 24 | 2286200   | 2288297   | 2098   | 2   | 0.797648  | 0.095146 | 2285671   | 2286730   | 2287550   | 2289041   |
| 753 NA18860 | [2515685 chrY  | 24 | 9201365   | 9201770   | 406    | 2   | -0.453455 | 0.089849 | 9201170   | 9201560   | 9201609   | 9201931   |
| 754 NA18860 | [2515685 chrY  | 24 | 9203902   | 9205634   | 1733   | 5   | 0.554888  | 0.070549 | 9203765   | 9204039   | 9205546   | 9205721   |
| 755 NA18860 | [2515685 chrY  | 24 | 21995100  | 22050469  | 55370  | 185 | 0.357557  | 0.009257 | 21994995  | 21995205  | 22050325  | 22050611  |
| 756 NA18860 | [2515685 chrY  | 24 | 22363212  | 22408082  | 44871  | 151 | 0.355608  | 0.010179 | 22363068  | 22363357  | 22407858  | 22408301  |
| 757 NA18860 | [2515685 chrY  | 24 | 22650628  | 22671548  | 20921  | 70  | 0.324992  | 0.015387 | 22649721  | 22651535  | 22671238  | 22671851  |
| 758 NA18860 | [2515685 chrY  | 24 | 22797436  | 22798350  | 915    | 3   | 0.426096  | 0.074631 | 22797160  | 22797713  | 22797960  | 22798741  |
| 759 NA18860 | [2515685 chrY  | 24 | 22883410  | 22905218  | 21809  | 69  | 0.323816  | 0.015467 | 22883100  | 22883721  | 22905194  | 22905241  |
| 760 NA18860 | [2515685 chrY  | 24 | 23632162  | 23649003  | 16842  | 37  | -0.699657 | 0.022164 | 23628879  | 23635103  | 23648757  | 23649241  |
| 761 NA18860 | [2515685 chrY  | 24 | 23716390  | 23741767  | 25378  | 63  | -0.705809 | 0.016773 | 23716144  | 23716636  | 23741434  | 23742101  |
| 762 NA18860 | [2515685 chrY  | 24 | 23749871  | 23765186  | 15316  | 48  | -0.307712 | 0.020277 | 23749752  | 23749991  | 23764790  | 23765581  |
| 763 NA18860 | [2515685 chrY  | 24 | 25266900  | 25285076  | 18177  | 47  | -0.791337 | 0.020186 | 25266567  | 25267234  | 25284830  | 25285321  |
| 764 NA18860 | [2515685 chrY  | 24 | 25341625  | 25362432  | 20808  | 44  | -0.756021 | 0.020515 | 25341379  | 25341871  | 25359491  | 25366501  |
| 765 NA18860 | [2515685 chrY  | 24 | 25367928  | 25380861  | 12934  | 37  | -0.310955 | 0.023289 | 25367809  | 25368048  | 25380465  | 25381251  |
| 766 NA18860 | [2515685 chrY  | 24 | 57531227  | 57533466  | 2240   | 2   | -0.93719  | 0.113781 | 57530168  | 57532287  | 57532610  | 57534321  |
| 767 NA18860 | [2515685 chrY  | 24 | 57599133  | 57600104  | 972    | 2   | 0.810664  | 0.11738  | 57598662  | 57599605  | 57599769  | 57600441  |
| 768 NA18860 | [2515685 chrY  | 24 | 57689143  | 57700305  | 11163  | 10  | 0.432971  | 0.044788 | 57687237  | 57691050  | 57689919  | 57701691  |
| 1 NA18564   | [2515685 chr1  | 1  | 601032    | 609358    | 8327   | 7   | -0.605524 | 0.054814 | 587801    | 604315    | 608594    | 610122    |
| 2 NA18564   | [2515685 chr1  | 1  | 752209    | 890985    | 138777 | 186 | 0.28601   | 0.010523 | 751974    | 752445    | 890729    | 891241    |
| 3 NA18564   | [2515685 chr1  | 1  | 6429810   | 6529553   | 99744  | 5   | 0.4378    | 0.064644 | 6412294   | 6433093   | 6526270   | 6606241   |
| 4 NA18564   | [2515685 chr1  | 1  | 10416438  | 10418311  | 1874   | 2   | -0.825161 | 0.097794 | 10415863  | 10417014  | 10417712  | 10418911  |
| 5 NA18564   | [2515685 chr1  | 1  | 12785372  | 12790585  | 5214   | 12  | 0.296105  | 0.036215 | 12785195  | 12785549  | 12790241  | 12790921  |
| 6 NA18564   | [2515685 chr1  | 1  | 12829124  | 12869451  | 40328  | 50  | 0.272526  | 0.009339 | 12828579  | 12829669  | 12868612  | 12870291  |

|            |               |   |           |           |        |     |           |          |           |           |           |           |
|------------|---------------|---|-----------|-----------|--------|-----|-----------|----------|-----------|-----------|-----------|-----------|
| 7 NA18564  | [2515685 chr1 | 1 | 12881057  | 12927842  | 46786  | 105 | 0.272526  | 0.009339 | 12881004  | 12881111  | 12927646  | 1292803!  |
| 8 NA18564  | [2515685 chr1 | 1 | 12950589  | 12966035  | 15447  | 28  | -0.486663 | 0.026147 | 12950107  | 12951071  | 12965849  | 1296622   |
| 9 NA18564  | [2515685 chr1 | 1 | 12995178  | 13014231  | 19054  | 25  | 0.40887   | 0.027475 | 12994551  | 12995806  | 13013335  | 1301512   |
| 10 NA18564 | [2515685 chr1 | 1 | 13069187  | 13096219  | 27033  | 36  | -0.550439 | 0.022859 | 13015127  | 13072470  | 13095739  | 1309670!  |
| 11 NA18564 | [2515685 chr1 | 1 | 13144855  | 13151544  | 6690   | 6   | 0.498572  | 0.048219 | 13142107  | 13147604  | 13151351  | 1315173!  |
| 12 NA18564 | [2515685 chr1 | 1 | 13159940  | 13162706  | 2767   | 4   | 0.780475  | 0.053256 | 13159618  | 13160263  | 13162366  | 1316304!  |
| 13 NA18564 | [2515685 chr1 | 1 | 13177342  | 13197672  | 20331  | 13  | 0.383674  | 0.029211 | 13176478  | 13178206  | 13197496  | 1319784!  |
| 14 NA18564 | [2515685 chr1 | 1 | 13216105  | 13240056  | 23952  | 28  | -0.462936 | 0.021418 | 13214189  | 13218021  | 13239572  | 1324054!  |
| 15 NA18564 | [2515685 chr1 | 1 | 13255302  | 13260399  | 5098   | 7   | 0.292425  | 0.039585 | 13254786  | 13255819  | 13260178  | 1326062!  |
| 16 NA18564 | [2515685 chr1 | 1 | 13365652  | 13372341  | 6690   | 6   | 0.498572  | 0.048219 | 13362904  | 13368401  | 13372148  | 1337253!  |
| 17 NA18564 | [2515685 chr1 | 1 | 13380737  | 13383503  | 2767   | 4   | 0.780475  | 0.053256 | 13380415  | 13381060  | 13383163  | 1338384!  |
| 18 NA18564 | [2515685 chr1 | 1 | 13398137  | 13418527  | 20391  | 13  | 0.383674  | 0.029211 | 13397275  | 13399000  | 13418351  | 1341870!  |
| 19 NA18564 | [2515685 chr1 | 1 | 13436941  | 13460890  | 23950  | 28  | -0.472148 | 0.021525 | 13435025  | 13438857  | 13460405  | 1346137!  |
| 20 NA18564 | [2515685 chr1 | 1 | 13476132  | 13481239  | 5108   | 7   | 0.292425  | 0.039585 | 13475616  | 13476649  | 13481019  | 1348146!  |
| 21 NA18564 | [2515685 chr1 | 1 | 16577498  | 16590019  | 12522  | 19  | 0.343119  | 0.006306 | 16577091  | 16577906  | 16587726  | 1659231!  |
| 22 NA18564 | [2515685 chr1 | 1 | 16600109  | 16951179  | 351071 | 449 | 0.343119  | 0.006306 | 16599837  | 16600382  | 16950818  | 1695154!  |
| 23 NA18564 | [2515685 chr1 | 1 | 16963802  | 16975161  | 11360  | 11  | 0.31349   | 0.041131 | 16961444  | 16966160  | 16974917  | 1697540!  |
| 24 NA18564 | [2515685 chr1 | 1 | 25330950  | 25409968  | 79019  | 78  | 0.323014  | 0.016023 | 25330662  | 25331238  | 25409763  | 2541017!  |
| 25 NA18564 | [2515685 chr1 | 1 | 32118397  | 32120834  | 2438   | 2   | -1.022692 | 0.108393 | 32117378  | 32119416  | 32120153  | 3212151!  |
| 26 NA18564 | [2515685 chr1 | 1 | 72478372  | 72524180  | 45809  | 36  | -3.017964 | 0.046958 | 72478140  | 72478604  | 72523661  | 7252470!  |
| 27 NA18564 | [2515685 chr1 | 1 | 86112825  | 86116608  | 3784   | 5   | -2.682035 | 0.116364 | 86112582  | 86113069  | 86116349  | 8611686!  |
| 28 NA18564 | [2515685 chr1 | 1 | 89188117  | 89190762  | 2646   | 1   | 1.578754  | 0.089052 | 89187764  | 89188470  | 89190458  | 8919106!  |
| 29 NA18564 | [2515685 chr1 | 1 | 105728161 | 105735462 | 7302   | 8   | -1.025603 | 0.063217 | 105727820 | 105728503 | 105734532 | 10573639  |
| 30 NA18564 | [2515685 chr1 | 1 | 105862636 | 105864295 | 1660   | 2   | -0.522275 | 0.095496 | 105862373 | 105862900 | 105864051 | 10586454  |
| 31 NA18564 | [2515685 chr1 | 1 | 108514938 | 108565175 | 50238  | 59  | 0.372235  | 0.019438 | 108514864 | 108515012 | 108565023 | 10856532  |
| 32 NA18564 | [2515685 chr1 | 1 | 108638318 | 108688767 | 50450  | 59  | 0.38398   | 0.019334 | 108638254 | 108638383 | 108688693 | 10868884  |
| 33 NA18564 | [2515685 chr1 | 1 | 112405902 | 112416691 | 10790  | 10  | 0.618268  | 0.050259 | 112405415 | 112406389 | 112416423 | 11241696  |
| 34 NA18564 | [2515685 chr1 | 1 | 141915781 | 141918521 | 2741   | 9   | 0.606204  | 0.040368 | 141915140 | 141916422 | 141918279 | 14191876  |
| 35 NA18564 | [2515685 chr1 | 1 | 141966491 | 141975681 | 9191   | 31  | 0.385308  | 0.020366 | 141966486 | 141966496 | 141975633 | 14197573  |
| 36 NA18564 | [2515685 chr1 | 1 | 142096128 | 142096822 | 695    | 2   | 0.628573  | 0.081881 | 142095585 | 142096671 | 142096672 | 14209697  |
| 37 NA18564 | [2515685 chr1 | 1 | 142438265 | 142569435 | 131171 | 157 | 0.348453  | 0.011427 | 142437427 | 142439104 | 142568775 | 14257009  |
| 38 NA18564 | [2515685 chr1 | 1 | 142744385 | 142745273 | 889    | 2   | 0.817871  | 0.121632 | 142743794 | 142744976 | 142745023 | 14274552  |
| 39 NA18564 | [2515685 chr1 | 1 | 144971729 | 144975140 | 3412   | 4   | 0.413711  | 0.079267 | 144971442 | 144972016 | 144974825 | 14497545  |
| 40 NA18564 | [2515685 chr1 | 1 | 145044635 | 145046862 | 2228   | 6   | 0.469111  | 0.047158 | 145044092 | 145045178 | 145046708 | 14504701  |
| 41 NA18564 | [2515685 chr1 | 1 | 145046862 | 145047267 | 406    | 2   | 1.023603  | 0.086759 | 145046708 | 145047016 | 145047025 | 14504750  |
| 42 NA18564 | [2515685 chr1 | 1 | 145091514 | 145107601 | 16088  | 50  | 0.361279  | 0.016466 | 145089695 | 145093333 | 145107302 | 14510790  |
| 43 NA18564 | [2515685 chr1 | 1 | 145381606 | 145402904 | 21299  | 45  | 0.29312   | 0.017062 | 145381586 | 145381626 | 145401111 | 14540469  |
| 44 NA18564 | [2515685 chr1 | 1 | 145543635 | 145564933 | 21299  | 44  | 0.295242  | 0.017227 | 145543615 | 145543655 | 145563140 | 14556672  |
| 45 NA18564 | [2515685 chr1 | 1 | 145814302 | 145869472 | 55171  | 68  | 0.268076  | 0.005637 | 145812747 | 145815857 | 145869230 | 14586971  |
| 46 NA18564 | [2515685 chr1 | 1 | 145874661 | 146344860 | 470200 | 492 | 0.268076  | 0.005637 | 145874397 | 145874925 | 146343057 | 14634666  |
| 47 NA18564 | [2515685 chr1 | 1 | 146389143 | 146391476 | 2334   | 6   | 0.700072  | 0.051871 | 146388901 | 146389385 | 146391229 | 14639172  |
| 48 NA18564 | [2515685 chr1 | 1 | 148998878 | 149005918 | 7041   | 13  | 0.67572   | 0.030374 | 148998401 | 148999355 | 149004680 | 14900715  |
| 49 NA18564 | [2515685 chr1 | 1 | 149368571 | 149385742 | 17172  | 3   | -1.053964 | 0.092304 | 149368105 | 149369038 | 149385339 | 14938614  |
| 50 NA18564 | [2515685 chr1 | 1 | 149385742 | 149399435 | 13694  | 19  | -2.966015 | 0.065484 | 149385339 | 149386145 | 149399080 | 14939979  |
| 51 NA18564 | [2515685 chr1 | 1 | 149573040 | 149583431 | 10392  | 6   | 0.762493  | 0.067954 | 149572621 | 149573460 | 149582912 | 14958395  |
| 52 NA18564 | [2515685 chr1 | 1 | 158225480 | 158253277 | 27798  | 40  | -0.494696 | 0.016636 | 158225276 | 158225685 | 158252398 | 15825415  |
| 53 NA18564 | [2515685 chr1 | 1 | 158255053 | 158264535 | 9483   | 5   | -0.374055 | 0.058571 | 158254848 | 158255258 | 158264300 | 15826477  |
| 54 NA18564 | [2515685 chr1 | 1 | 158295459 | 158377436 | 81978  | 96  | -1.064763 | 0.01605  | 158294850 | 158296068 | 158377203 | 15837767! |
| 55 NA18564 | [2515685 chr1 | 1 | 171527310 | 171533429 | 6120   | 6   | -0.899306 | 0.066004 | 171526198 | 171528423 | 171532245 | 17153361  |
| 56 NA18564 | [2515685 chr1 | 1 | 192541700 | 192547982 | 6283   | 3   | -0.433517 | 0.077658 | 192541312 | 192542088 | 192547786 | 19254817! |
| 57 NA18564 | [2515685 chr1 | 1 | 193448820 | 193554182 | 105363 | 88  | 0.527217  | 0.015916 | 193448631 | 193449010 | 193553474 | 19355489  |
| 58 NA18564 | [2515685 chr1 | 1 | 193615671 | 193650443 | 34773  | 30  | 0.263335  | 0.025769 | 193615441 | 193615901 | 193650245 | 19365064  |
| 59 NA18564 | [2515685 chr1 | 1 | 221964327 | 221993707 | 29381  | 26  | 0.466922  | 0.026861 | 221963143 | 221965511 | 221992970 | 22199444  |
| 60 NA18564 | [2515685 chr1 | 1 | 226117234 | 226125736 | 8503   | 2   | -0.61558  | 0.112967 | 226114786 | 226119683 | 226122453 | 22612975  |
| 61 NA18564 | [2515685 chr1 | 1 | 231219104 | 231262742 | 43639  | 48  | 0.45313   | 0.021111 | 231218806 | 231219402 | 231261830 | 23126365  |

|             |               |   |           |           |        |     |           |          |           |           |           |          |
|-------------|---------------|---|-----------|-----------|--------|-----|-----------|----------|-----------|-----------|-----------|----------|
| 62 NA18564  | [2515685 chr1 | 1 | 233202036 | 233204956 | 2921   | 43  | -0.404923 | 0.018155 | 233201760 | 233202312 | 233204364 | 23320554 |
| 63 NA18564  | [2515685 chr1 | 1 | 239368545 | 239498531 | 129987 | 15  | -0.432746 | 0.037964 | 239368239 | 239368851 | 239496181 | 23950088 |
| 64 NA18564  | [2515685 chr2 | 2 | 297104    | 298925    | 1822   | 7   | 0.385319  | 0.057461 | 296699    | 297510    | 298661    | 299189   |
| 65 NA18564  | [2515685 chr2 | 2 | 388500    | 390704    | 2205   | 6   | -0.528355 | 0.062274 | 387915    | 389086    | 390173    | 391236   |
| 66 NA18564  | [2515685 chr2 | 2 | 409864    | 411481    | 1618   | 12  | 0.290138  | 0.042977 | 409612    | 410116    | 411229    | 411733   |
| 67 NA18564  | [2515685 chr2 | 2 | 4722540   | 4724061   | 1522   | 2   | 0.544132  | 0.097843 | 4722151   | 4722930   | 4723456   | 4724666  |
| 68 NA18564  | [2515685 chr2 | 2 | 10581245  | 10632393  | 51149  | 54  | 0.44125   | 0.020178 | 10580919  | 10581571  | 10629433  | 1063741  |
| 69 NA18564  | [2515685 chr2 | 2 | 34606437  | 34644772  | 38336  | 39  | 0.823851  | 0.025358 | 34601818  | 34609397  | 34641812  | 3464839  |
| 70 NA18564  | [2515685 chr2 | 2 | 35896470  | 35905939  | 9470   | 3   | -0.86051  | 0.088543 | 35879425  | 35899430  | 35902979  | 3590982  |
| 71 NA18564  | [2515685 chr2 | 2 | 37869648  | 37911473  | 41826  | 43  | -0.478757 | 0.022733 | 37869077  | 37870220  | 37911214  | 3791173  |
| 72 NA18564  | [2515685 chr2 | 2 | 52661573  | 52696869  | 35297  | 26  | -3.286059 | 0.056569 | 52661218  | 52661928  | 52696416  | 5269732  |
| 73 NA18564  | [2515685 chr2 | 2 | 56563617  | 56567381  | 3765   | 2   | 3.252075  | 0.021349 | 56556559  | 56566577  | 56567035  | 5656772  |
| 74 NA18564  | [2515685 chr2 | 2 | 66416834  | 66420210  | 3377   | 2   | -0.684628 | 0.122413 | 66416385  | 66417284  | 66419065  | 6642135  |
| 75 NA18564  | [2515685 chr2 | 2 | 73922476  | 73948487  | 26012  | 42  | 0.922654  | 0.01538  | 73922222  | 73922730  | 73948060  | 7394891  |
| 76 NA18564  | [2515685 chr2 | 2 | 75296507  | 75298934  | 2428   | 2   | 0.576011  | 0.103116 | 75296056  | 75296959  | 75298532  | 7529933  |
| 77 NA18564  | [2515685 chr2 | 2 | 80676753  | 80679626  | 2874   | 2   | -1.05121  | 0.113086 | 80675216  | 80678291  | 80678901  | 8068035  |
| 78 NA18564  | [2515685 chr2 | 2 | 87963983  | 88098957  | 134975 | 14  | 0.314882  | 0.040635 | 87963455  | 87964512  | 88097049  | 8810086  |
| 79 NA18564  | [2515685 chr2 | 2 | 97184386  | 97189742  | 5357   | 2   | -0.865599 | 0.108299 | 97182781  | 97185992  | 97186782  | 9719672  |
| 80 NA18564  | [2515685 chr2 | 2 | 97613796  | 97614932  | 1137   | 2   | 1.034049  | 0.124552 | 97613553  | 97614040  | 97614467  | 9761539  |
| 81 NA18564  | [2515685 chr2 | 2 | 106339466 | 106344320 | 4855   | 6   | -0.543624 | 0.068312 | 106339069 | 106339864 | 106344055 | 10634458 |
| 82 NA18564  | [2515685 chr2 | 2 | 108313968 | 108314875 | 908    | 2   | 0.711048  | 0.109399 | 108313664 | 108314272 | 108314680 | 10831507 |
| 83 NA18564  | [2515685 chr2 | 2 | 111696774 | 111699147 | 2374   | 16  | 0.45893   | 0.036683 | 111696413 | 111697136 | 111698899 | 11169939 |
| 84 NA18564  | [2515685 chr2 | 2 | 123193457 | 123198547 | 5091   | 4   | -0.890253 | 0.075667 | 123193121 | 123193793 | 123198337 | 12319875 |
| 85 NA18564  | [2515685 chr2 | 2 | 126159437 | 126168349 | 8913   | 3   | -3.538774 | 0.160257 | 126158494 | 126160381 | 126168048 | 12616865 |
| 86 NA18564  | [2515685 chr2 | 2 | 126839002 | 126840204 | 1203   | 3   | -0.513764 | 0.090703 | 126838868 | 126839137 | 126839708 | 12684070 |
| 87 NA18564  | [2515685 chr2 | 2 | 129229413 | 129230774 | 1362   | 2   | -1.251781 | 0.128066 | 129229234 | 129229593 | 129230356 | 12923119 |
| 88 NA18564  | [2515685 chr2 | 2 | 129354604 | 129360182 | 5579   | 4   | -5.318239 | 0.211407 | 129354317 | 129354892 | 129357659 | 12936270 |
| 89 NA18564  | [2515685 chr2 | 2 | 130096771 | 130097708 | 938    | 2   | -0.972646 | 0.120745 | 130096554 | 130096988 | 130097523 | 13009789 |
| 90 NA18564  | [2515685 chr2 | 2 | 130410671 | 130425589 | 14919  | 10  | -0.271681 | 0.046602 | 130410236 | 130411106 | 130423487 | 13042769 |
| 91 NA18564  | [2515685 chr2 | 2 | 146694138 | 146710744 | 16607  | 17  | -2.616755 | 0.06979  | 146688620 | 146697098 | 146710557 | 14671093 |
| 92 NA18564  | [2515685 chr2 | 2 | 153622711 | 153625256 | 2546   | 3   | 0.869339  | 0.092757 | 153621175 | 153624247 | 153625088 | 15362542 |
| 93 NA18564  | [2515685 chr2 | 2 | 195804965 | 195809805 | 4841   | 5   | -0.711168 | 0.072958 | 195803577 | 195806354 | 195809355 | 19581025 |
| 94 NA18564  | [2515685 chr2 | 2 | 208176479 | 208184457 | 7979   | 7   | 0.823573  | 0.061373 | 208176093 | 208176865 | 208183930 | 20818498 |
| 95 NA18564  | [2515685 chr2 | 2 | 232512469 | 232537143 | 24675  | 6   | -0.382308 | 0.040695 | 232511142 | 232513796 | 232534243 | 23254004 |
| 96 NA18564  | [2515685 chr2 | 2 | 234742469 | 234743945 | 1477   | 2   | -0.668865 | 0.112137 | 234742152 | 234742786 | 234743507 | 23474438 |
| 97 NA18564  | [2515685 chr2 | 2 | 242664580 | 242668683 | 4104   | 10  | 1.384689  | 0.040654 | 242664284 | 242664877 | 242668532 | 24266883 |
| 98 NA18564  | [2515685 chr3 | 3 | 154057    | 157210    | 3154   | 3   | -0.456978 | 0.083524 | 153604    | 154511    | 156642    | 157779   |
| 99 NA18564  | [2515685 chr3 | 3 | 1757211   | 1765715   | 8505   | 2   | 0.940552  | 0.120733 | 1756096   | 1758327   | 1762058   | 179730   |
| 100 NA18564 | [2515685 chr3 | 3 | 29654594  | 29656066  | 1473   | 2   | -0.524306 | 0.100987 | 29654069  | 29655120  | 29655652  | 2965648  |
| 101 NA18564 | [2515685 chr3 | 3 | 33396128  | 33397914  | 1787   | 2   | -0.961274 | 0.117574 | 33395092  | 33397165  | 33397588  | 3339824  |
| 102 NA18564 | [2515685 chr3 | 3 | 47798187  | 47820469  | 22283  | 20  | 0.273766  | 0.032288 | 47797874  | 47798501  | 47820356  | 4782058  |
| 103 NA18564 | [2515685 chr3 | 3 | 50884673  | 50888513  | 3841   | 5   | 0.426475  | 0.068285 | 50865193  | 50888330  | 50888495  | 5088853  |
| 104 NA18564 | [2515685 chr3 | 3 | 106127289 | 106128660 | 1372   | 2   | -0.835081 | 0.099673 | 106126821 | 106127758 | 106128182 | 10612913 |
| 105 NA18564 | [2515685 chr3 | 3 | 161838609 | 161848881 | 10273  | 12  | -0.884719 | 0.043924 | 161838322 | 161838896 | 161848436 | 16184932 |
| 106 NA18564 | [2515685 chr3 | 3 | 163994592 | 164106273 | 111682 | 106 | 2.449627  | 0.026777 | 163993392 | 163995793 | 164106029 | 16410651 |
| 107 NA18564 | [2515685 chr3 | 3 | 164106273 | 164108502 | 2230   | 2   | 0.597979  | 0.113086 | 164106029 | 164106517 | 164108018 | 16410898 |
| 108 NA18564 | [2515685 chr3 | 3 | 164200660 | 164204121 | 3462   | 4   | -4.209025 | 0.18154  | 164200187 | 164201133 | 164203568 | 16420467 |
| 109 NA18564 | [2515685 chr3 | 3 | 176561952 | 176567506 | 5555   | 5   | -0.876871 | 0.070292 | 176560250 | 176563654 | 176565991 | 17656902 |
| 110 NA18564 | [2515685 chr3 | 3 | 190846156 | 190852181 | 6026   | 4   | -1.01645  | 0.079556 | 190845504 | 190846809 | 190850598 | 19085376 |
| 111 NA18564 | [2515685 chr3 | 3 | 192547312 | 192554331 | 7020   | 10  | 0.831567  | 0.051466 | 192546950 | 192547674 | 192554127 | 19255453 |
| 112 NA18564 | [2515685 chr3 | 3 | 196679304 | 196713768 | 34465  | 36  | 0.545036  | 0.019721 | 196677636 | 196680972 | 196711768 | 19671576 |
| 113 NA18564 | [2515685 chr3 | 3 | 196946678 | 196958848 | 12171  | 10  | -0.540994 | 0.04808  | 196946096 | 196947261 | 196956437 | 19696126 |
| 114 NA18564 | [2515685 chr3 | 3 | 196988595 | 197004602 | 16008  | 26  | 0.265167  | 0.028227 | 196988208 | 196988982 | 197004284 | 19700492 |
| 115 NA18564 | [2515685 chr3 | 3 | 198422794 | 198427408 | 4615   | 2   | 0.871429  | 0.120345 | 198422381 | 198423207 | 198423959 | 19843085 |
| 116 NA18564 | [2515685 chr3 | 3 | 199313925 | 199321063 | 7139   | 15  | 0.986756  | 0.029482 | 199313515 | 199314336 | 199320844 | 19932128 |

|             |               |   |           |           |        |     |           |          |           |           |           |           |
|-------------|---------------|---|-----------|-----------|--------|-----|-----------|----------|-----------|-----------|-----------|-----------|
| 117 NA18564 | [2515685 chr4 | 4 | 728045    | 731845    | 3801   | 2   | 0.668604  | 0.097314 | 727736    | 728355    | 731532    | 732155    |
| 118 NA18564 | [2515685 chr4 | 4 | 3853958   | 3855414   | 1457   | 2   | 0.664774  | 0.111869 | 3853163   | 3854754   | 3855199   | 3855625   |
| 119 NA18564 | [2515685 chr4 | 4 | 8740317   | 8756949   | 16633  | 25  | 0.827537  | 0.020603 | 8740049   | 8740586   | 8756813   | 8757086   |
| 120 NA18564 | [2515685 chr4 | 4 | 8998165   | 9046719   | 48555  | 77  | 0.665861  | 0.011474 | 8850774   | 9001243   | 9046129   | 9047305   |
| 121 NA18564 | [2515685 chr4 | 4 | 9299457   | 9308037   | 8581   | 6   | -1.524685 | 0.083255 | 9295439   | 9302535   | 9306599   | 9309476   |
| 122 NA18564 | [2515685 chr4 | 4 | 9812346   | 9813108   | 763    | 33  | 0.740027  | 0.019741 | 9812284   | 9812408   | 9812952   | 9813265   |
| 123 NA18564 | [2515685 chr4 | 4 | 9887220   | 9911397   | 24178  | 31  | 2.911092  | 0.050134 | 9886886   | 9887555   | 9910388   | 9912407   |
| 124 NA18564 | [2515685 chr4 | 4 | 9939379   | 9943104   | 3726   | 7   | 0.285184  | 0.051004 | 9939127   | 9939631   | 9942862   | 9943346   |
| 125 NA18564 | [2515685 chr4 | 4 | 33200574  | 33201715  | 1142   | 2   | 0.636513  | 0.108735 | 33200322  | 33200826  | 33201357  | 33202075  |
| 126 NA18564 | [2515685 chr4 | 4 | 34602797  | 34650994  | 48198  | 45  | 0.841882  | 0.024004 | 34601994  | 34603600  | 34649535  | 34652455  |
| 127 NA18564 | [2515685 chr4 | 4 | 49022713  | 49176391  | 153679 | 365 | -0.258463 | 0.006657 | 49022424  | 49023002  | 49174409  | 49178375  |
| 128 NA18564 | [2515685 chr4 | 4 | 69202585  | 69320563  | 117979 | 72  | 1.12486   | 0.023154 | 69202236  | 69202934  | 69320240  | 69320885  |
| 129 NA18564 | [2515685 chr4 | 4 | 69320563  | 69341211  | 20649  | 16  | 0.331808  | 0.017766 | 69320240  | 69320887  | 69340966  | 69341451  |
| 130 NA18564 | [2515685 chr4 | 4 | 69347741  | 69365270  | 17530  | 21  | 0.331808  | 0.017766 | 69347112  | 69348370  | 69365129  | 69365541  |
| 131 NA18564 | [2515685 chr4 | 4 | 69671789  | 69693234  | 21446  | 24  | 0.314739  | 0.016679 | 69671604  | 69671975  | 69692988  | 69693481  |
| 132 NA18564 | [2515685 chr4 | 4 | 69699752  | 69717280  | 17529  | 24  | 0.314739  | 0.016679 | 69699123  | 69700381  | 69717139  | 69717425  |
| 133 NA18564 | [2515685 chr4 | 4 | 70277983  | 70417223  | 139241 | 143 | 0.373343  | 0.012605 | 70277671  | 70278295  | 70416364  | 70418085  |
| 134 NA18564 | [2515685 chr4 | 4 | 71408191  | 71430587  | 22397  | 25  | -0.836295 | 0.031418 | 71407950  | 71408433  | 71430348  | 71430825  |
| 135 NA18564 | [2515685 chr4 | 4 | 124835704 | 124837199 | 1496   | 3   | -0.650402 | 0.083126 | 124835418 | 124835991 | 124836924 | 124837475 |
| 136 NA18564 | [2515685 chr4 | 4 | 125304905 | 125305983 | 1079   | 2   | 0.66683   | 0.103305 | 125304587 | 125305223 | 125305732 | 125306233 |
| 137 NA18564 | [2515685 chr4 | 4 | 133536180 | 133540723 | 4544   | 3   | -3.296893 | 0.192339 | 133531398 | 133539258 | 133540462 | 13354098  |
| 138 NA18564 | [2515685 chr4 | 4 | 138537751 | 138549906 | 12156  | 14  | 0.900533  | 0.045282 | 138537443 | 138538059 | 138547414 | 13855239  |
| 139 NA18564 | [2515685 chr4 | 4 | 142588136 | 142590500 | 2365   | 4   | -0.796976 | 0.079838 | 142587774 | 142588498 | 142590303 | 14259069  |
| 140 NA18564 | [2515685 chr4 | 4 | 161371184 | 161377067 | 5884   | 10  | -0.950497 | 0.053173 | 161370737 | 161371632 | 161376564 | 161377575 |
| 141 NA18564 | [2515685 chr4 | 4 | 162806038 | 162809269 | 3232   | 3   | 0.839652  | 0.087287 | 162804872 | 162807204 | 162808734 | 16280980  |
| 142 NA18564 | [2515685 chr4 | 4 | 169184442 | 169368370 | 183929 | 160 | 0.835795  | 0.012377 | 169184090 | 169184794 | 169366713 | 16937002  |
| 143 NA18564 | [2515685 chr4 | 4 | 173363594 | 173367718 | 4125   | 6   | -0.796445 | 0.062591 | 173362583 | 173364606 | 173367283 | 17336815  |
| 144 NA18564 | [2515685 chr4 | 4 | 173799832 | 173807333 | 7502   | 6   | -3.993166 | 0.162226 | 173799464 | 173800201 | 173804255 | 17381134  |
| 145 NA18564 | [2515685 chr4 | 4 | 185533276 | 185544849 | 11574  | 12  | 0.793674  | 0.045736 | 185532696 | 185533857 | 185543276 | 18554642  |
| 146 NA18564 | [2515685 chr4 | 4 | 190528602 | 190533163 | 4562   | 21  | -0.310859 | 0.032004 | 190528058 | 190529146 | 190531664 | 19053466  |
| 147 NA18564 | [2515685 chr4 | 4 | 190941429 | 190942794 | 1366   | 3   | 0.526645  | 0.070963 | 190941038 | 190941820 | 190942354 | 19094323  |
| 148 NA18564 | [2515685 chr5 | 5 | 520743    | 521684    | 942    | 5   | 1.032878  | 0.082659 | 520428    | 521059    | 521427    | 521942    |
| 149 NA18564 | [2515685 chr5 | 5 | 730362    | 967076    | 236715 | 235 | 0.2621    | 0.006372 | 729845    | 730880    | 966797    | 967355    |
| 150 NA18564 | [2515685 chr5 | 5 | 1051497   | 1079920   | 28424  | 52  | 0.2621    | 0.006372 | 1051206   | 1051789   | 1079566   | 1080275   |
| 151 NA18564 | [2515685 chr5 | 5 | 1122190   | 1126930   | 4741   | 40  | 0.2621    | 0.006372 | 1121609   | 1122772   | 1126646   | 1127215   |
| 152 NA18564 | [2515685 chr5 | 5 | 1231558   | 1233247   | 1690   | 2   | -1.002262 | 0.099323 | 1231167   | 1231949   | 1232879   | 1233615   |
| 153 NA18564 | [2515685 chr5 | 5 | 17550023  | 17551708  | 1686   | 3   | -0.517444 | 0.067761 | 17549646  | 17550401  | 17551613  | 17551805  |
| 154 NA18564 | [2515685 chr5 | 5 | 17570617  | 17643104  | 72488  | 331 | -0.644659 | 0.006164 | 17570551  | 17570684  | 17642455  | 17643755  |
| 155 NA18564 | [2515685 chr5 | 5 | 17663728  | 17667407  | 3680   | 8   | -0.536763 | 0.042948 | 17663473  | 17663984  | 17667174  | 17667645  |
| 156 NA18564 | [2515685 chr5 | 5 | 17745629  | 17750443  | 4815   | 2   | 1.02647   | 0.103597 | 17745478  | 17745780  | 17748817  | 17752071  |
| 157 NA18564 | [2515685 chr5 | 5 | 19410747  | 19412172  | 1426   | 3   | 0.72186   | 0.085558 | 19410189  | 19411305  | 19411980  | 19412365  |
| 158 NA18564 | [2515685 chr5 | 5 | 21483394  | 21488147  | 4754   | 4   | -3.105555 | 0.123311 | 21480817  | 21485972  | 21487855  | 21488435  |
| 159 NA18564 | [2515685 chr5 | 5 | 32295710  | 32297985  | 2276   | 2   | -0.937562 | 0.113522 | 32295082  | 32296338  | 32296746  | 32299225  |
| 160 NA18564 | [2515685 chr5 | 5 | 68886836  | 68961866  | 75031  | 132 | -0.290946 | 0.010754 | 68886492  | 68887180  | 68960721  | 68963015  |
| 161 NA18564 | [2515685 chr5 | 5 | 69357598  | 69404835  | 47238  | 47  | 0.35906   | 0.016483 | 69357245  | 69357951  | 69404157  | 69405515  |
| 162 NA18564 | [2515685 chr5 | 5 | 69404835  | 69411352  | 6518   | 6   | 0.896934  | 0.046742 | 69404157  | 69405513  | 69410702  | 69412005  |
| 163 NA18564 | [2515685 chr5 | 5 | 69742254  | 69817505  | 75252  | 123 | -0.287848 | 0.011035 | 69741639  | 69742870  | 69816360  | 69818655  |
| 164 NA18564 | [2515685 chr5 | 5 | 70195200  | 70291713  | 96514  | 104 | 0.309316  | 0.010116 | 70194720  | 70195680  | 70287456  | 70294911  |
| 165 NA18564 | [2515685 chr5 | 5 | 70303574  | 70309397  | 5824   | 10  | 0.309316  | 0.010116 | 70303355  | 70303794  | 70308614  | 70310181  |
| 166 NA18564 | [2515685 chr5 | 5 | 70322955  | 70403953  | 80999  | 131 | -0.306796 | 0.010986 | 70321793  | 70324118  | 70403337  | 70404565  |
| 167 NA18564 | [2515685 chr5 | 5 | 79992681  | 79999566  | 6886   | 7   | 0.311269  | 0.061009 | 79992202  | 79993161  | 79998428  | 80000705  |
| 168 NA18564 | [2515685 chr5 | 5 | 81459202  | 81466066  | 6865   | 2   | -1.451852 | 0.123834 | 81455614  | 81462405  | 81462863  | 81470281  |
| 169 NA18564 | [2515685 chr5 | 5 | 97427204  | 97428665  | 1462   | 3   | 0.731188  | 0.095986 | 97426913  | 97427496  | 97428529  | 97428805  |
| 170 NA18564 | [2515685 chr5 | 5 | 97465497  | 97467027  | 1531   | 3   | -0.451391 | 0.087603 | 97465358  | 97465637  | 97466801  | 97467255  |
| 171 NA18564 | [2515685 chr5 | 5 | 98692416  | 98694362  | 1947   | 3   | 0.592408  | 0.082804 | 98691745  | 98693087  | 98694014  | 98694715  |

|             |               |   |           |           |       |    |           |          |           |           |           |          |
|-------------|---------------|---|-----------|-----------|-------|----|-----------|----------|-----------|-----------|-----------|----------|
| 172 NA18564 | [2515685 chr5 | 5 | 98867127  | 98870861  | 3735  | 2  | -1.722171 | 0.173667 | 98864129  | 98870125  | 98870667  | 9887105! |
| 173 NA18564 | [2515685 chr5 | 5 | 99753556  | 99755901  | 2346  | 9  | -0.253992 | 0.049555 | 99753490  | 99753623  | 99755598  | 9975620. |
| 174 NA18564 | [2515685 chr5 | 5 | 137835178 | 137844134 | 8957  | 8  | 0.581205  | 0.057086 | 137834745 | 137835611 | 137843310 | 13784495 |
| 175 NA18564 | [2515685 chr5 | 5 | 140194263 | 140197431 | 3169  | 5  | 0.350961  | 0.067978 | 140193978 | 140194548 | 140197059 | 14019780 |
| 176 NA18564 | [2515685 chr5 | 5 | 140203081 | 140217091 | 14011 | 18 | 2.606689  | 0.062645 | 140202344 | 140203819 | 140216552 | 14021763 |
| 177 NA18564 | [2515685 chr5 | 5 | 140217091 | 140218928 | 1838  | 2  | 1.19114   | 0.111192 | 140216552 | 140217631 | 140218508 | 14021934 |
| 178 NA18564 | [2515685 chr5 | 5 | 140534849 | 140540106 | 5258  | 5  | 0.809172  | 0.06713  | 140534700 | 140534999 | 140539007 | 14054120 |
| 179 NA18564 | [2515685 chr5 | 5 | 150157909 | 150161837 | 3929  | 6  | -0.875846 | 0.068569 | 150157286 | 150158532 | 150161621 | 15016205 |
| 180 NA18564 | [2515685 chr5 | 5 | 150183322 | 150203801 | 20480 | 11 | -0.768734 | 0.048451 | 150181427 | 150185218 | 150203451 | 15020415 |
| 181 NA18564 | [2515685 chr5 | 5 | 155337139 | 155339408 | 2270  | 2  | -0.784318 | 0.111512 | 155336532 | 155337747 | 155338229 | 15534058 |
| 182 NA18564 | [2515685 chr5 | 5 | 180418059 | 180419113 | 1055  | 2  | 0.732416  | 0.127759 | 180417894 | 180418224 | 180418598 | 18041962 |
| 183 NA18564 | [2515685 chr6 | 6 | 240929    | 327656    | 86728 | 99 | 0.36622   | 0.014631 | 240278    | 241581    | 326993    | 328320   |
| 184 NA18564 | [2515685 chr6 | 6 | 19149239  | 19156670  | 7432  | 10 | -0.861258 | 0.048954 | 19148813  | 19149665  | 19153876  | 1915946! |
| 185 NA18564 | [2515685 chr6 | 6 | 29954251  | 30032459  | 78209 | 71 | 0.474433  | 0.018243 | 29950833  | 29957670  | 30032181  | 3003273! |
| 186 NA18564 | [2515685 chr6 | 6 | 30051460  | 30052527  | 1068  | 3  | 0.800832  | 0.088628 | 30051232  | 30051688  | 30052363  | 3005269! |
| 187 NA18564 | [2515685 chr6 | 6 | 30063619  | 30064799  | 1181  | 2  | 0.57571   | 0.101695 | 30063441  | 30063797  | 30064536  | 3006506! |
| 188 NA18564 | [2515685 chr6 | 6 | 31345252  | 31346265  | 1014  | 2  | -1.030631 | 0.104154 | 31344957  | 31345548  | 31345931  | 3134659! |
| 189 NA18564 | [2515685 chr6 | 6 | 31387065  | 31419859  | 32795 | 16 | -0.885781 | 0.041003 | 31386395  | 31387736  | 31418034  | 3142168. |
| 190 NA18564 | [2515685 chr6 | 6 | 32539488  | 32547042  | 7555  | 3  | -0.46803  | 0.088013 | 32539084  | 32539892  | 32546557  | 3254752! |
| 191 NA18564 | [2515685 chr6 | 6 | 32557802  | 32558865  | 1064  | 2  | 0.827215  | 0.114959 | 32557647  | 32557958  | 32558698  | 3255903! |
| 192 NA18564 | [2515685 chr6 | 6 | 32564602  | 32586862  | 22261 | 4  | -0.901384 | 0.137147 | 32564316  | 32564888  | 32586127  | 3258759! |
| 193 NA18564 | [2515685 chr6 | 6 | 32589957  | 32591649  | 1693  | 3  | -0.494791 | 0.088751 | 32589338  | 32590576  | 32591403  | 3259189! |
| 194 NA18564 | [2515685 chr6 | 6 | 32605125  | 32617055  | 11931 | 9  | -0.380248 | 0.04788  | 32604923  | 32605328  | 32613543  | 3262657  |
| 195 NA18564 | [2515685 chr6 | 6 | 32631127  | 32632349  | 1223  | 2  | -0.621266 | 0.121811 | 32630911  | 32631343  | 32632089  | 3263261! |
| 196 NA18564 | [2515685 chr6 | 6 | 32653862  | 32655482  | 1621  | 2  | 1.323998  | 0.151027 | 32653679  | 32654046  | 32654980  | 3265598. |
| 197 NA18564 | [2515685 chr6 | 6 | 32666229  | 32667673  | 1445  | 3  | 0.507424  | 0.086547 | 32665899  | 32666560  | 32667507  | 3266783! |
| 198 NA18564 | [2515685 chr6 | 6 | 32672888  | 32680221  | 7334  | 6  | 0.353702  | 0.062028 | 32672612  | 32673164  | 32679896  | 3268054. |
| 199 NA18564 | [2515685 chr6 | 6 | 32735351  | 32736908  | 1558  | 3  | 0.623269  | 0.092968 | 32734985  | 32735718  | 32736724  | 3273709! |
| 200 NA18564 | [2515685 chr6 | 6 | 32741849  | 32744343  | 2495  | 4  | 0.883814  | 0.082805 | 32741631  | 32742067  | 32744136  | 3274455! |
| 201 NA18564 | [2515685 chr6 | 6 | 32744343  | 32749233  | 4891  | 3  | -0.482117 | 0.090936 | 32744136  | 32744550  | 327445721 | 3275666! |
| 202 NA18564 | [2515685 chr6 | 6 | 66455162  | 66461833  | 6672  | 5  | -0.815182 | 0.077162 | 66454046  | 66456278  | 66461410  | 6646225! |
| 203 NA18564 | [2515685 chr6 | 6 | 74648985  | 74654614  | 5630  | 10 | -2.56976  | 0.081438 | 74648748  | 74649222  | 74653982  | 7465524. |
| 204 NA18564 | [2515685 chr6 | 6 | 77495034  | 77513523  | 18490 | 12 | 0.755917  | 0.047145 | 77493568  | 77496500  | 77510011  | 7751769! |
| 205 NA18564 | [2515685 chr6 | 6 | 79023318  | 79093263  | 69946 | 70 | 0.847209  | 0.019199 | 79022028  | 79024609  | 79091909  | 7909461! |
| 206 NA18564 | [2515685 chr6 | 6 | 103844685 | 103871201 | 26517 | 17 | 2.9984    | 0.069261 | 103844347 | 103845023 | 103868241 | 10387416 |
| 207 NA18564 | [2515685 chr6 | 6 | 115492959 | 115494541 | 1583  | 2  | 1.160025  | 0.128185 | 115492678 | 115493240 | 115494140 | 11549494 |
| 208 NA18564 | [2515685 chr6 | 6 | 160056728 | 160058998 | 2271  | 2  | -3.939986 | 0.183629 | 160055808 | 160057648 | 160058322 | 16005967 |
| 209 NA18564 | [2515685 chr6 | 6 | 161001907 | 161038394 | 36488 | 62 | 0.662109  | 0.012923 | 161001167 | 161002648 | 161038184 | 16103860 |
| 210 NA18564 | [2515685 chr6 | 6 | 162708136 | 162709963 | 1828  | 2  | -1.15164  | 0.118829 | 162707715 | 162708557 | 162709130 | 16271079 |
| 211 NA18564 | [2515685 chr6 | 6 | 168780035 | 168781989 | 1955  | 4  | -0.650202 | 0.076707 | 168779504 | 168780567 | 168781555 | 16878242 |
| 212 NA18564 | [2515685 chr6 | 6 | 169643176 | 169644457 | 1282  | 2  | 0.7035    | 0.127801 | 169642647 | 169643706 | 169644168 | 16964474 |
| 213 NA18564 | [2515685 chr6 | 6 | 170603879 | 170604666 | 788   | 2  | -1.549209 | 0.121101 | 170603541 | 170604217 | 170604339 | 17060499 |
| 214 NA18564 | [2515685 chr7 | 7 | 155442    | 158227    | 2786  | 4  | -0.451938 | 0.075863 | 155019    | 155866    | 157830    | 158624   |
| 215 NA18564 | [2515685 chr7 | 7 | 1084125   | 1086660   | 2536  | 15 | 0.504436  | 0.035641 | 1083752   | 1084499   | 1085871   | 108744!  |
| 216 NA18564 | [2515685 chr7 | 7 | 3384111   | 3392466   | 8356  | 8  | 0.841271  | 0.056575 | 3383451   | 3384772   | 3390107   | 339561!  |
| 217 NA18564 | [2515685 chr7 | 7 | 6518590   | 6520714   | 2125  | 2  | 0.832829  | 0.107931 | 6517957   | 6519223   | 6520078   | 652135!  |
| 218 NA18564 | [2515685 chr7 | 7 | 14024131  | 14025556  | 1426  | 5  | -0.674009 | 0.076891 | 14023511  | 14024751  | 14025262  | 1402585! |
| 219 NA18564 | [2515685 chr7 | 7 | 38154080  | 38178711  | 24632 | 28 | -0.272878 | 0.026279 | 38153653  | 38154508  | 38177987  | 3817943! |
| 220 NA18564 | [2515685 chr7 | 7 | 53869656  | 53872136  | 2481  | 2  | -0.536282 | 0.089772 | 53869183  | 53870130  | 53870844  | 5387342! |
| 221 NA18564 | [2515685 chr7 | 7 | 56956206  | 56957573  | 1368  | 6  | -0.455491 | 0.068466 | 56956139  | 56956274  | 56957233  | 5695791! |
| 222 NA18564 | [2515685 chr7 | 7 | 62134653  | 62135875  | 1223  | 2  | -0.681868 | 0.101754 | 62134258  | 62135049  | 62135619  | 6213613! |
| 223 NA18564 | [2515685 chr7 | 7 | 62153758  | 62158032  | 4275  | 14 | -0.444194 | 0.040815 | 62153637  | 62153880  | 62158011  | 6215805! |
| 224 NA18564 | [2515685 chr7 | 7 | 62223671  | 62239385  | 15715 | 71 | -0.361727 | 0.017297 | 62223604  | 62223738  | 62239384  | 6223938! |
| 225 NA18564 | [2515685 chr7 | 7 | 62254472  | 62255088  | 617   | 4  | 0.621602  | 0.071152 | 62254309  | 62254635  | 62254924  | 6225525! |
| 226 NA18564 | [2515685 chr7 | 7 | 62302079  | 62302696  | 618   | 4  | 0.621604  | 0.071152 | 62301915  | 62302243  | 62302533  | 6230285! |

|             |               |   |           |           |        |     |           |          |           |           |           |           |
|-------------|---------------|---|-----------|-----------|--------|-----|-----------|----------|-----------|-----------|-----------|-----------|
| 227 NA18564 | [2515685 chr7 | 7 | 62309817  | 62333584  | 23768  | 89  | -0.347281 | 0.01546  | 62309804  | 62309830  | 62333517  | 6233365:  |
| 228 NA18564 | [2515685 chr7 | 7 | 62395807  | 62399676  | 3870   | 12  | -0.398198 | 0.046397 | 62395483  | 62396131  | 62399488  | 6239986:  |
| 229 NA18564 | [2515685 chr7 | 7 | 62651575  | 62670122  | 18548  | 9   | 0.255329  | 0.032576 | 62650114  | 62653036  | 62667763  | 6267326:  |
| 230 NA18564 | [2515685 chr7 | 7 | 63995985  | 64009675  | 13691  | 17  | 0.357644  | 0.036474 | 63995676  | 63996294  | 64009043  | 6401030:  |
| 231 NA18564 | [2515685 chr7 | 7 | 64029672  | 64045487  | 15816  | 45  | -0.489511 | 0.021093 | 64029291  | 64030053  | 64045069  | 6404590:  |
| 232 NA18564 | [2515685 chr7 | 7 | 64162316  | 64165371  | 3056   | 2   | 0.844134  | 0.141817 | 64160143  | 64164489  | 64165089  | 6416565:  |
| 233 NA18564 | [2515685 chr7 | 7 | 64464087  | 64481591  | 17505  | 46  | -0.468249 | 0.020779 | 64463669  | 64464506  | 64481417  | 6448176:  |
| 234 NA18564 | [2515685 chr7 | 7 | 64538610  | 64556662  | 18053  | 48  | -0.45891  | 0.020084 | 64537873  | 64539348  | 64556244  | 6455708:  |
| 235 NA18564 | [2515685 chr7 | 7 | 64690171  | 64725545  | 35375  | 38  | 0.402853  | 0.022647 | 64689761  | 64690582  | 64725209  | 6472588:  |
| 236 NA18564 | [2515685 chr7 | 7 | 72013828  | 72014871  | 1044   | 4   | 0.566312  | 0.065907 | 72013665  | 72013991  | 72014598  | 7201514:  |
| 237 NA18564 | [2515685 chr7 | 7 | 73823616  | 73824682  | 1067   | 5   | 0.517097  | 0.06443  | 73823477  | 73823755  | 73824463  | 7382490:  |
| 238 NA18564 | [2515685 chr7 | 7 | 73917034  | 73918196  | 1163   | 2   | 1.041967  | 0.100623 | 73917029  | 73917040  | 73917270  | 7391912:  |
| 239 NA18564 | [2515685 chr7 | 7 | 73965656  | 73966691  | 1036   | 4   | 0.381967  | 0.067966 | 73965279  | 73966033  | 73966513  | 7396687:  |
| 240 NA18564 | [2515685 chr7 | 7 | 74096901  | 74097943  | 1043   | 4   | 0.566321  | 0.065907 | 74096630  | 74097173  | 74097780  | 7409810:  |
| 241 NA18564 | [2515685 chr7 | 7 | 74417518  | 74418680  | 1163   | 2   | 1.041927  | 0.100621 | 74416593  | 74418444  | 74418675  | 7441868:  |
| 242 NA18564 | [2515685 chr7 | 7 | 74510928  | 74512131  | 1204   | 5   | 0.538559  | 0.061145 | 74510847  | 74511009  | 74511969  | 7451229:  |
| 243 NA18564 | [2515685 chr7 | 7 | 75790452  | 75794984  | 4533   | 5   | -0.748785 | 0.070808 | 75790248  | 75790656  | 75794325  | 7579564:  |
| 244 NA18564 | [2515685 chr7 | 7 | 89455106  | 89456632  | 1527   | 3   | 3.398375  | 0.140416 | 89454839  | 89455373  | 89456225  | 8945703:  |
| 245 NA18564 | [2515685 chr7 | 7 | 90676411  | 90686518  | 10108  | 14  | -0.799216 | 0.043492 | 90674727  | 90678095  | 90685238  | 9068779:  |
| 246 NA18564 | [2515685 chr7 | 7 | 92971481  | 92976895  | 5415   | 4   | 0.965924  | 0.089527 | 92971060  | 92971903  | 92975569  | 9297822:  |
| 247 NA18564 | [2515685 chr7 | 7 | 97038338  | 97047344  | 9007   | 16  | -0.715157 | 0.040654 | 97032531  | 97040697  | 97046973  | 9704771:  |
| 248 NA18564 | [2515685 chr7 | 7 | 99513362  | 99516859  | 3498   | 5   | 0.355231  | 0.053838 | 99513133  | 99513592  | 99514500  | 9952443:  |
| 249 NA18564 | [2515685 chr7 | 7 | 100202927 | 100203955 | 1029   | 2   | 0.660226  | 0.110046 | 100202569 | 100203285 | 100203714 | 10020419: |
| 250 NA18564 | [2515685 chr7 | 7 | 104755288 | 104758660 | 3373   | 2   | 0.862735  | 0.10952  | 104754871 | 104755705 | 104756890 | 10476043: |
| 251 NA18564 | [2515685 chr7 | 7 | 109034775 | 109046722 | 11948  | 9   | 2.349179  | 0.0853   | 109024063 | 109037134 | 10904691  | 10904695: |
| 252 NA18564 | [2515685 chr7 | 7 | 109776378 | 109782655 | 6278   | 5   | 0.906638  | 0.075089 | 109775821 | 109776936 | 109782301 | 10978301: |
| 253 NA18564 | [2515685 chr7 | 7 | 125639507 | 125644775 | 5269   | 6   | -0.785859 | 0.075592 | 125639054 | 125639961 | 125644046 | 12564550: |
| 254 NA18564 | [2515685 chr7 | 7 | 126108382 | 126126371 | 17990  | 27  | -0.342784 | 0.026722 | 126107861 | 126108904 | 126125619 | 12612712: |
| 255 NA18564 | [2515685 chr7 | 7 | 133243381 | 133245202 | 1822   | 2   | 0.967039  | 0.108685 | 133243008 | 133243755 | 133244207 | 13324619: |
| 256 NA18564 | [2515685 chr7 | 7 | 133245202 | 133257368 | 12167  | 13  | 3.365694  | 0.084141 | 133244207 | 133246197 | 133255009 | 13326093: |
| 257 NA18564 | [2515685 chr7 | 7 | 141218636 | 141247657 | 29022  | 30  | -0.699368 | 0.029677 | 141217990 | 141219282 | 141247027 | 14124828: |
| 258 NA18564 | [2515685 chr7 | 7 | 141760008 | 141761893 | 1886   | 2   | -0.78459  | 0.118951 | 141759690 | 141760326 | 141761589 | 14176219: |
| 259 NA18564 | [2515685 chr7 | 7 | 141962017 | 141978673 | 16657  | 22  | -0.454238 | 0.032872 | 141961693 | 141962342 | 141978355 | 14197899: |
| 260 NA18564 | [2515685 chr7 | 7 | 143257273 | 143259025 | 1753   | 2   | -0.657366 | 0.11257  | 143256987 | 143257560 | 143258671 | 14325938: |
| 261 NA18564 | [2515685 chr7 | 7 | 143316069 | 143511719 | 195651 | 369 | 0.266382  | 0.007056 | 143315654 | 143316485 | 143511270 | 14351216: |
| 262 NA18564 | [2515685 chr7 | 7 | 156976112 | 156978464 | 2353   | 2   | 1.252593  | 0.113627 | 156975812 | 156976413 | 156977896 | 15697903: |
| 263 NA18564 | [2515685 chr7 | 7 | 158207288 | 158209880 | 2593   | 2   | 0.989375  | 0.127753 | 158206344 | 158208233 | 158209333 | 15821042: |
| 264 NA18564 | [2515685 chr7 | 7 | 158617060 | 158624387 | 7328   | 6   | 0.898757  | 0.068054 | 158616763 | 158617357 | 158622028 | 15862674: |
| 265 NA18564 | [2515685 chr8 | 8 | 314016    | 317019    | 3004   | 5   | 0.418026  | 0.062245 | 313588    | 314445    | 316753    | 317286:   |
| 266 NA18564 | [2515685 chr8 | 8 | 345497    | 346644    | 1148   | 3   | 0.503278  | 0.08227  | 345046    | 345949    | 346440    | 346848:   |
| 267 NA18564 | [2515685 chr8 | 8 | 1328256   | 1343509   | 15254  | 45  | -1.138658 | 0.020679 | 1327688   | 1328824   | 1342795   | 1344224:  |
| 268 NA18564 | [2515685 chr8 | 8 | 2238726   | 2253801   | 15076  | 10  | 0.78308   | 0.050929 | 2233839   | 2241488   | 2251039   | 225752:   |
| 269 NA18564 | [2515685 chr8 | 8 | 5582875   | 5594011   | 11137  | 9   | 0.88513   | 0.049447 | 5582615   | 5583135   | 5592820   | 5595203:  |
| 270 NA18564 | [2515685 chr8 | 8 | 7098713   | 7190831   | 92119  | 294 | -0.741604 | 0.0031   | 7098285   | 7099142   | 7188864   | 7192798:  |
| 271 NA18564 | [2515685 chr8 | 8 | 7202731   | 7268617   | 65887  | 88  | -0.741604 | 0.0031   | 7202348   | 7203115   | 7267878   | 726935:   |
| 272 NA18564 | [2515685 chr8 | 8 | 7275854   | 7430731   | 154878 | 359 | -0.741604 | 0.0031   | 7275509   | 7276199   | 7430300   | 743116:   |
| 273 NA18564 | [2515685 chr8 | 8 | 7607253   | 7848819   | 241567 | 574 | -0.741604 | 0.0031   | 7606824   | 7607682   | 7848557   | 784908:   |
| 274 NA18564 | [2515685 chr8 | 8 | 7861585   | 7928723   | 67139  | 188 | -0.741604 | 0.0031   | 7861524   | 7861646   | 7928292   | 7929154:  |
| 275 NA18564 | [2515685 chr8 | 8 | 12023134  | 12034819  | 11686  | 32  | 0.566186  | 0.02631  | 12022997  | 12023272  | 12034665  | 1203497:  |
| 276 NA18564 | [2515685 chr8 | 8 | 12035286  | 12064826  | 29541  | 49  | -0.269867 | 0.017714 | 12034973  | 12035599  | 12064663  | 1206498:  |
| 277 NA18564 | [2515685 chr8 | 8 | 12064826  | 12072445  | 7620   | 25  | -1.179093 | 0.025862 | 12064663  | 12064989  | 12072267  | 1207262:  |
| 278 NA18564 | [2515685 chr8 | 8 | 12276602  | 12284041  | 7440   | 13  | 0.488263  | 0.037959 | 12276206  | 12276998  | 12283622  | 1228446:  |
| 279 NA18564 | [2515685 chr8 | 8 | 12304064  | 12314107  | 10044  | 19  | -0.337273 | 0.026639 | 12303884  | 12304245  | 12313944  | 1231427:  |
| 280 NA18564 | [2515685 chr8 | 8 | 12314107  | 12321726  | 7620   | 22  | -1.127736 | 0.026874 | 12313944  | 12314270  | 12321548  | 1232190:  |
| 281 NA18564 | [2515685 chr8 | 8 | 18900549  | 18901909  | 1361   | 2   | -0.649357 | 0.103187 | 18900138  | 18900960  | 18901577  | 1890224:  |

|             |                |    |           |           |        |     |           |          |           |           |           |           |
|-------------|----------------|----|-----------|-----------|--------|-----|-----------|----------|-----------|-----------|-----------|-----------|
| 282 NA18564 | [2515685 chr8  | 8  | 20022286  | 20024771  | 2486   | 2   | -0.739502 | 0.114013 | 20021082  | 20023491  | 20024338  | 2002520-  |
| 283 NA18564 | [2515685 chr8  | 8  | 21832667  | 21833967  | 1301   | 2   | 0.839769  | 0.106189 | 21832108  | 21833227  | 21833678  | 2183425-  |
| 284 NA18564 | [2515685 chr8  | 8  | 39351178  | 39506673  | 155496 | 161 | 0.76402   | 0.012658 | 39350826  | 39351530  | 39505284  | 3950806-  |
| 285 NA18564 | [2515685 chr8  | 8  | 49081430  | 49084499  | 3070   | 2   | 0.685775  | 0.113736 | 49079497  | 49083364  | 49084089  | 4908491-  |
| 286 NA18564 | [2515685 chr8  | 8  | 58278355  | 58289214  | 10860  | 9   | 1.085806  | 0.042412 | 58277116  | 58279595  | 58288084  | 5829034-  |
| 287 NA18564 | [2515685 chr8  | 8  | 58290538  | 58296106  | 5569   | 7   | 0.393183  | 0.058606 | 58290345  | 58290731  | 58295669  | 5829654-  |
| 288 NA18564 | [2515685 chr8  | 8  | 85423649  | 85431920  | 8272   | 7   | 0.954661  | 0.058435 | 85423043  | 85424256  | 85431347  | 8543249-  |
| 289 NA18564 | [2515685 chr8  | 8  | 86742169  | 86910255  | 168087 | 105 | 0.504653  | 0.010534 | 86741757  | 86742581  | 86910002  | 8691050-  |
| 290 NA18564 | [2515685 chr8  | 8  | 120222652 | 120229952 | 7301   | 6   | 0.758506  | 0.064386 | 120218251 | 120225414 | 120229434 | 12023047- |
| 291 NA18564 | [2515685 chr8  | 8  | 144782802 | 144785960 | 3159   | 2   | 0.684118  | 0.106029 | 144771440 | 144785564 | 144785821 | 14478609- |
| 292 NA18564 | [2515685 chr8  | 8  | 145530388 | 145532720 | 2333   | 2   | 0.775863  | 0.125111 | 145530166 | 145530611 | 145532494 | 14553294- |
| 293 NA18564 | [2515685 chr9  | 9  | 46143     | 48200     | 2058   | 3   | -0.510664 | 0.088453 | 46139     | 46147     | 47314     | 49087     |
| 294 NA18564 | [2515685 chr9  | 9  | 7433854   | 7435652   | 1799   | 2   | -0.621718 | 0.111644 | 7433283   | 7434425   | 7435034   | 743627-   |
| 295 NA18564 | [2515685 chr9  | 9  | 16890360  | 16894575  | 4216   | 5   | -0.379246 | 0.068569 | 16889923  | 16890798  | 16894273  | 1689487-  |
| 296 NA18564 | [2515685 chr9  | 9  | 17801093  | 17818912  | 17820  | 17  | -0.938089 | 0.039827 | 17800758  | 17801428  | 17818264  | 1781956-  |
| 297 NA18564 | [2515685 chr9  | 9  | 28836246  | 28838385  | 2140   | 2   | -0.93963  | 0.106175 | 28835879  | 28836613  | 28837661  | 2883911-  |
| 298 NA18564 | [2515685 chr9  | 9  | 38899810  | 38903431  | 3622   | 4   | 0.41716   | 0.073408 | 38899653  | 38899968  | 38901063  | 3890594-  |
| 299 NA18564 | [2515685 chr9  | 9  | 39068492  | 39069421  | 930    | 3   | 0.457647  | 0.090543 | 39068340  | 39068645  | 39069135  | 3906970-  |
| 300 NA18564 | [2515685 chr9  | 9  | 41193344  | 41199633  | 6290   | 5   | 0.378658  | 0.066462 | 41193015  | 41193673  | 41199476  | 4119979-  |
| 301 NA18564 | [2515685 chr9  | 9  | 43808781  | 43810310  | 1530   | 2   | 0.571868  | 0.103471 | 43808388  | 43809175  | 43810107  | 4381051-  |
| 302 NA18564 | [2515685 chr9  | 9  | 66005782  | 66012061  | 6280   | 5   | 0.378658  | 0.066462 | 66005453  | 66006111  | 66011904  | 6601221-  |
| 303 NA18564 | [2515685 chr9  | 9  | 66393539  | 66397327  | 3789   | 6   | -0.353928 | 0.059551 | 66389640  | 66395907  | 66397103  | 6639755-  |
| 304 NA18564 | [2515685 chr9  | 9  | 67195876  | 67196883  | 1008   | 2   | 0.471697  | 0.093232 | 67195691  | 67196062  | 67196717  | 6719704-  |
| 305 NA18564 | [2515685 chr9  | 9  | 68200977  | 68201915  | 939    | 2   | 0.729706  | 0.104652 | 68200578  | 68201376  | 68201730  | 6820210-  |
| 306 NA18564 | [2515685 chr9  | 9  | 101794472 | 101804576 | 10105  | 8   | -0.801666 | 0.062773 | 101793428 | 101795517 | 101803113 | 10180603- |
| 307 NA18564 | [2515685 chr9  | 9  | 112684489 | 112687545 | 3057   | 2   | -0.57414  | 0.112141 | 112684198 | 112684780 | 112686624 | 11268846- |
| 308 NA18564 | [2515685 chr9  | 9  | 112902065 | 112932269 | 30205  | 42  | 0.696453  | 0.016159 | 112901557 | 112902574 | 112931621 | 11293291- |
| 309 NA18564 | [2515685 chr9  | 9  | 135438413 | 135444067 | 5655   | 2   | 3.374252  | 0.174595 | 135383632 | 135440781 | 135443016 | 13544511- |
| 310 NA18564 | [2515685 chr10 | 10 | 3099589   | 3101985   | 2397   | 2   | 0.577307  | 0.114706 | 3098962   | 3100217   | 3101441   | 310252-   |
| 311 NA18564 | [2515685 chr10 | 10 | 6693908   | 6703893   | 9986   | 8   | 0.78777   | 0.056855 | 6692231   | 6695585   | 6703779   | 670400-   |
| 312 NA18564 | [2515685 chr10 | 10 | 19788068  | 19793233  | 5166   | 5   | -0.409206 | 0.066145 | 19787726  | 19788411  | 19791659  | 1979480-  |
| 313 NA18564 | [2515685 chr10 | 10 | 19850003  | 19851799  | 1797   | 2   | -0.646886 | 0.111588 | 19849781  | 19850225  | 19850931  | 1985266-  |
| 314 NA18564 | [2515685 chr10 | 10 | 20888194  | 20900119  | 11926  | 9   | -0.798753 | 0.055073 | 20883329  | 20890946  | 20897367  | 2090291-  |
| 315 NA18564 | [2515685 chr10 | 10 | 46110964  | 46132737  | 21774  | 37  | -0.371252 | 0.018644 | 46110327  | 46111602  | 46132697  | 4613277-  |
| 316 NA18564 | [2515685 chr10 | 10 | 46168755  | 46171356  | 2602   | 11  | -0.448744 | 0.039017 | 46168488  | 46169022  | 46171200  | 4617151-  |
| 317 NA18564 | [2515685 chr10 | 10 | 46187014  | 46188550  | 1537   | 4   | -0.48809  | 0.054217 | 46186825  | 46187203  | 46188262  | 4618883-  |
| 318 NA18564 | [2515685 chr10 | 10 | 46197322  | 46600786  | 403465 | 626 | -0.335938 | 0.003335 | 46197082  | 46197562  | 46600776  | 4660079-  |
| 319 NA18564 | [2515685 chr10 | 10 | 46607936  | 46641482  | 33547  | 94  | -0.335938 | 0.003335 | 46606211  | 46609661  | 46640773  | 4664219-  |
| 320 NA18564 | [2515685 chr10 | 10 | 46645411  | 46675076  | 29666  | 107 | -0.335938 | 0.003335 | 46645296  | 46645526  | 46675054  | 4667509-  |
| 321 NA18564 | [2515685 chr10 | 10 | 46677788  | 47173707  | 495920 | 548 | -0.335938 | 0.003335 | 46677220  | 46678357  | 47173507  | 4717390-  |
| 322 NA18564 | [2515685 chr10 | 10 | 47220005  | 47220637  | 633    | 4   | -0.65508  | 0.074999 | 47219903  | 47220107  | 47220533  | 4722074-  |
| 323 NA18564 | [2515685 chr10 | 10 | 47227413  | 47227763  | 351    | 2   | -0.631568 | 0.081335 | 47227267  | 47227560  | 47227636  | 4722789-  |
| 324 NA18564 | [2515685 chr10 | 10 | 47230731  | 47231502  | 772    | 2   | -0.667148 | 0.084442 | 47230574  | 47230889  | 47231201  | 4723180-  |
| 325 NA18564 | [2515685 chr10 | 10 | 47723230  | 47758287  | 35058  | 106 | -0.375513 | 0.0118   | 47575187  | 47725982  | 47758256  | 4775831-  |
| 326 NA18564 | [2515685 chr10 | 10 | 47767237  | 47791242  | 24006  | 61  | -0.322151 | 0.015801 | 47766982  | 47767493  | 47791005  | 4779148-  |
| 327 NA18564 | [2515685 chr10 | 10 | 47798683  | 47801563  | 2881   | 11  | -0.497256 | 0.040996 | 47798645  | 47798721  | 47801368  | 4780175-  |
| 328 NA18564 | [2515685 chr10 | 10 | 47885738  | 47886088  | 351    | 2   | -0.631568 | 0.081335 | 47885592  | 47885885  | 47885961  | 4788621-  |
| 329 NA18564 | [2515685 chr10 | 10 | 47889059  | 47889830  | 772    | 2   | -0.667149 | 0.084442 | 47888902  | 47889217  | 47889529  | 4789013-  |
| 330 NA18564 | [2515685 chr10 | 10 | 48497956  | 48516048  | 18093  | 28  | -0.374531 | 0.021311 | 48497240  | 48498672  | 48515812  | 4851628-  |
| 331 NA18564 | [2515685 chr10 | 10 | 48558524  | 48561054  | 2531   | 12  | -0.431287 | 0.037716 | 48558257  | 48558791  | 48560968  | 4856114-  |
| 332 NA18564 | [2515685 chr10 | 10 | 48574881  | 48584011  | 9131   | 23  | -0.307277 | 0.012578 | 48574098  | 48575665  | 48583989  | 4858403-  |
| 333 NA18564 | [2515685 chr10 | 10 | 48586485  | 48611077  | 24593  | 62  | -0.307277 | 0.012578 | 48586154  | 48586817  | 48610821  | 4861133-  |
| 334 NA18564 | [2515685 chr10 | 10 | 48620019  | 48718249  | 98231  | 175 | -0.374436 | 0.008266 | 48619988  | 48620051  | 48715497  | 4886556-  |
| 335 NA18564 | [2515685 chr10 | 10 | 48925221  | 48927636  | 2416   | 10  | -0.42355  | 0.042753 | 48924954  | 48925488  | 48927550  | 4892772-  |
| 336 NA18564 | [2515685 chr10 | 10 | 51119630  | 51132142  | 12513  | 19  | -0.381442 | 0.026801 | 51119365  | 51119895  | 51131917  | 5113236-  |

|             |                |    |           |           |        |     |                    |           |           |           |           |
|-------------|----------------|----|-----------|-----------|--------|-----|--------------------|-----------|-----------|-----------|-----------|
| 337 NA18564 | [2515685 chr10 | 10 | 52136987  | 52139263  | 2277   | 5   | -0.28273 0.048412  | 52136355  | 52137619  | 52139186  | 52139344  |
| 338 NA18564 | [2515685 chr10 | 10 | 55013473  | 55030874  | 17402  | 11  | 0.296942 0.048408  | 55011568  | 55015379  | 55030462  | 55031287  |
| 339 NA18564 | [2515685 chr10 | 10 | 55688761  | 55692072  | 3312   | 2   | -0.356643 0.070875 | 55655147  | 55691513  | 55691526  | 55692614  |
| 340 NA18564 | [2515685 chr10 | 10 | 56117212  | 56139275  | 22064  | 20  | -0.966265 0.035572 | 56115764  | 56118661  | 56138931  | 56139614  |
| 341 NA18564 | [2515685 chr10 | 10 | 58568864  | 58607072  | 38209  | 29  | -0.841775 0.029601 | 58563614  | 58571616  | 58606922  | 58607227  |
| 342 NA18564 | [2515685 chr10 | 10 | 66977355  | 66985193  | 7839   | 8   | -0.809158 0.05981  | 66976803  | 66977908  | 66984894  | 66985497  |
| 343 NA18564 | [2515685 chr10 | 10 | 79207078  | 79209041  | 1964   | 2   | 0.571875 0.095277  | 79206191  | 79207966  | 79208803  | 79209284  |
| 344 NA18564 | [2515685 chr10 | 10 | 88866216  | 88966295  | 100080 | 111 | -0.352962 0.012499 | 88865617  | 88866816  | 88965910  | 88966684  |
| 345 NA18564 | [2515685 chr10 | 10 | 89138419  | 89140735  | 2317   | 6   | -0.255465 0.049808 | 89137950  | 89138889  | 89140512  | 89140957  |
| 346 NA18564 | [2515685 chr10 | 10 | 89142153  | 89179229  | 37077  | 58  | -0.281696 0.017438 | 89141923  | 89142383  | 89178871  | 89179587  |
| 347 NA18564 | [2515685 chr10 | 10 | 124350353 | 124366738 | 16386  | 21  | -0.373524 0.022204 | 124350031 | 124350675 | 124366300 | 124367177 |
| 348 NA18564 | [2515685 chr10 | 10 | 133602364 | 133603160 | 797    | 11  | -0.269226 0.044054 | 133602112 | 133602617 | 133602987 | 133603333 |
| 349 NA18564 | [2515685 chr10 | 10 | 134924388 | 134935385 | 10998  | 30  | 0.322765 0.028214  | 134924070 | 134924706 | 134934910 | 134935866 |
| 350 NA18564 | [2515685 chr10 | 10 | 135179346 | 135183528 | 4183   | 23  | 0.538785 0.019635  | 135178919 | 135179774 | 135183320 | 135183733 |
| 351 NA18564 | [2515685 chr10 | 10 | 135365507 | 135367159 | 1653   | 2   | 0.951559 0.122641  | 135364999 | 135366016 | 135366656 | 135367666 |
| 352 NA18564 | [2515685 chr11 | 11 | 3628748   | 3632795   | 4048   | 6   | -0.444831 0.060057 | 3625722   | 3631775   | 3632594   | 3632994   |
| 353 NA18564 | [2515685 chr11 | 11 | 5741269   | 5765993   | 24725  | 33  | 2.110719 0.042837  | 5741059   | 5741480   | 5765632   | 5766354   |
| 354 NA18564 | [2515685 chr11 | 11 | 11780222  | 11782174  | 1953   | 2   | -0.919386 0.096929 | 11779958  | 11780486  | 11781057  | 11783297  |
| 355 NA18564 | [2515685 chr11 | 11 | 18903438  | 18923034  | 19597  | 30  | 0.753893 0.027406  | 18897800  | 18906533  | 18919939  | 18928457  |
| 356 NA18564 | [2515685 chr11 | 11 | 37084030  | 37093002  | 8973   | 10  | -0.850557 0.052192 | 37083696  | 37084364  | 37091978  | 37094027  |
| 357 NA18564 | [2515685 chr11 | 11 | 48284073  | 48284771  | 699    | 2   | 0.93495 0.106442   | 48283862  | 48284285  | 48284572  | 48284971  |
| 358 NA18564 | [2515685 chr11 | 11 | 49072856  | 49075952  | 3097   | 6   | 0.396808 0.061051  | 49072572  | 49073140  | 49075650  | 49076254  |
| 359 NA18564 | [2515685 chr11 | 11 | 49665830  | 49715843  | 50014  | 36  | 0.551004 0.024397  | 49665251  | 49666410  | 49712748  | 49721987  |
| 360 NA18564 | [2515685 chr11 | 11 | 55124643  | 55212663  | 88021  | 98  | -0.852198 0.016019 | 55124460  | 55124827  | 55209568  | 55215757  |
| 361 NA18564 | [2515685 chr11 | 11 | 58566484  | 58611261  | 44778  | 47  | 0.385161 0.021194  | 58566228  | 58566741  | 58610975  | 58611547  |
| 362 NA18564 | [2515685 chr11 | 11 | 60721034  | 60777477  | 56444  | 72  | 0.544437 0.013592  | 60720112  | 60721956  | 60776810  | 60778147  |
| 363 NA18564 | [2515685 chr11 | 11 | 73815147  | 73818580  | 3434   | 3   | -0.576253 0.092226 | 73812981  | 73817313  | 73818213  | 73818947  |
| 364 NA18564 | [2515685 chr11 | 11 | 88266938  | 88303948  | 37011  | 40  | 0.281152 0.023256  | 88266424  | 88267453  | 88303762  | 88304137  |
| 365 NA18564 | [2515685 chr11 | 11 | 89184898  | 89188706  | 3809   | 4   | 0.424444 0.077491  | 89184243  | 89185554  | 89188235  | 89189177  |
| 366 NA18564 | [2515685 chr11 | 11 | 113977904 | 114017431 | 39528  | 48  | 0.301526 0.020543  | 113976911 | 113978897 | 114016982 | 114017887 |
| 367 NA18564 | [2515685 chr11 | 11 | 114327207 | 114330790 | 3584   | 6   | -0.979096 0.067665 | 114326690 | 114327724 | 114330408 | 114331177 |
| 368 NA18564 | [2515685 chr11 | 11 | 134107699 | 134112290 | 4592   | 5   | 0.799675 0.069182  | 134106591 | 134108808 | 134111845 | 134111273 |
| 369 NA18564 | [2515685 chr12 | 12 | 398598    | 404873    | 6276   | 14  | -0.349582 0.027032 | 398035    | 399161    | 401600    | 408146    |
| 370 NA18564 | [2515685 chr12 | 12 | 736840    | 744802    | 7963   | 9   | 0.882151 0.052096  | 736616    | 737064    | 744211    | 745394    |
| 371 NA18564 | [2515685 chr12 | 12 | 2112534   | 2127840   | 15307  | 15  | 0.668332 0.039329  | 2109107   | 2115961   | 2127279   | 2128407   |
| 372 NA18564 | [2515685 chr12 | 12 | 6113530   | 6117052   | 3523   | 3   | 0.634899 0.094812  | 6111640   | 6115421   | 6116289   | 6117814   |
| 373 NA18564 | [2515685 chr12 | 12 | 8235890   | 8262986   | 27097  | 28  | -0.25007 0.027513  | 8233704   | 8238076   | 8262374   | 8263594   |
| 374 NA18564 | [2515685 chr12 | 12 | 8262986   | 8270350   | 7365   | 18  | -1.213237 0.030936 | 8262374   | 8263598   | 8269654   | 8271044   |
| 375 NA18564 | [2515685 chr12 | 12 | 10472497  | 10491904  | 19408  | 14  | -0.586325 0.043091 | 10472016  | 10472979  | 10488400  | 10553947  |
| 376 NA18564 | [2515685 chr12 | 12 | 11109398  | 11142012  | 32615  | 40  | -0.371135 0.022977 | 11109206  | 11109590  | 11141608  | 11142417  |
| 377 NA18564 | [2515685 chr12 | 12 | 12605956  | 12607299  | 1344   | 2   | 0.940708 0.125304  | 12605559  | 12606353  | 12606864  | 12607737  |
| 378 NA18564 | [2515685 chr12 | 12 | 30348930  | 30352723  | 3794   | 3   | 0.422412 0.084169  | 30348429  | 30349431  | 30351682  | 30353767  |
| 379 NA18564 | [2515685 chr12 | 12 | 57004588  | 57020201  | 15614  | 8   | 0.319174 0.053196  | 57004218  | 57004958  | 57019624  | 57020777  |
| 380 NA18564 | [2515685 chr12 | 12 | 78656134  | 78665261  | 9128   | 9   | -0.56035 0.050977  | 78654687  | 78657582  | 78664736  | 78665787  |
| 381 NA18564 | [2515685 chr12 | 12 | 127322032 | 127326052 | 4021   | 4   | 0.396738 0.078451  | 127321371 | 127322694 | 127325619 | 12732648  |
| 382 NA18564 | [2515685 chr12 | 12 | 128820239 | 128822626 | 2388   | 2   | -0.923632 0.11714  | 128819579 | 128820899 | 128821826 | 12882342  |
| 383 NA18564 | [2515685 chr12 | 12 | 130798727 | 130802870 | 4144   | 5   | -0.865721 0.066844 | 130798268 | 130799187 | 130801345 | 13080439  |
| 384 NA18564 | [2515685 chr13 | 13 | 25947233  | 25950398  | 3166   | 3   | 3.226417 0.152271  | 25946194  | 25948272  | 25949415  | 2595138   |
| 385 NA18564 | [2515685 chr13 | 13 | 33029551  | 33043421  | 13871  | 9   | 0.878603 0.056799  | 33000262  | 33034253  | 33042925  | 33043914  |
| 386 NA18564 | [2515685 chr13 | 13 | 33862844  | 33865211  | 2368   | 2   | 0.597637 0.118453  | 33862283  | 33863405  | 33864905  | 33865514  |
| 387 NA18564 | [2515685 chr13 | 13 | 69633905  | 69673289  | 39385  | 42  | 0.836621 0.023982  | 69633412  | 69634399  | 69672985  | 69673597  |
| 388 NA18564 | [2515685 chr13 | 13 | 84621201  | 84622847  | 1647   | 2   | -0.560629 0.103286 | 84620747  | 84621656  | 84622572  | 84623127  |
| 389 NA18564 | [2515685 chr13 | 13 | 110502383 | 110503129 | 747    | 3   | -1.036919 0.104915 | 110502225 | 110502541 | 110502890 | 11050336  |
| 390 NA18564 | [2515685 chr13 | 13 | 112717306 | 112719112 | 1807   | 2   | -0.631476 0.099275 | 112716919 | 112717694 | 112718845 | 11271938  |
| 391 NA18564 | [2515685 chr13 | 13 | 113079647 | 113086840 | 7194   | 3   | 0.620136 0.083418  | 113078890 | 113080404 | 113082138 | 11309434  |



|             |                |    |           |           |        |     |           |          |           |           |           |           |
|-------------|----------------|----|-----------|-----------|--------|-----|-----------|----------|-----------|-----------|-----------|-----------|
| 392 NA18564 | [2515685 chr14 | 14 | 18527136  | 18542743  | 15608  | 7   | -0.794149 | 0.058538 | 18526373  | 18527899  | 18541619  | 18543867  |
| 393 NA18564 | [2515685 chr14 | 14 | 18812120  | 18812893  | 774    | 2   | 0.728669  | 0.115776 | 18811788  | 18812452  | 18812454  | 18813337  |
| 394 NA18564 | [2515685 chr14 | 14 | 18858512  | 18869365  | 10854  | 9   | 0.512124  | 0.048453 | 18858310  | 18858714  | 18866159  | 18872577  |
| 395 NA18564 | [2515685 chr14 | 14 | 18902557  | 18903292  | 736    | 2   | 0.728669  | 0.115776 | 18902156  | 18902958  | 18902960  | 18903362  |
| 396 NA18564 | [2515685 chr14 | 14 | 19243278  | 19265232  | 21955  | 29  | 0.278062  | 0.023136 | 19239482  | 19247074  | 19261661  | 19268802  |
| 397 NA18564 | [2515685 chr14 | 14 | 19265232  | 19494842  | 229611 | 212 | 0.81726   | 0.010586 | 19261661  | 19268804  | 19494444  | 19495247  |
| 398 NA18564 | [2515685 chr14 | 14 | 19619338  | 19625484  | 6147   | 2   | 3.587017  | 0.228004 | 19612261  | 19624114  | 19625018  | 19625951  |
| 399 NA18564 | [2515685 chr14 | 14 | 40679041  | 40739449  | 60409  | 57  | -0.843033 | 0.021603 | 40678078  | 40680005  | 40739212  | 40739687  |
| 400 NA18564 | [2515685 chr14 | 14 | 73052083  | 73053781  | 1699   | 2   | -0.584506 | 0.081541 | 73051714  | 73052452  | 73052927  | 73054631  |
| 401 NA18564 | [2515685 chr14 | 14 | 73070288  | 73084642  | 14355  | 16  | -0.476581 | 0.04262  | 73068747  | 73071829  | 73083193  | 73086097  |
| 402 NA18564 | [2515685 chr14 | 14 | 73106064  | 73110687  | 4624   | 3   | 0.769834  | 0.084436 | 73105752  | 73106376  | 73110054  | 73111321  |
| 403 NA18564 | [2515685 chr14 | 14 | 77208427  | 77210081  | 1655   | 2   | -0.506394 | 0.09859  | 77207894  | 77208960  | 77209696  | 77210467  |
| 404 NA18564 | [2515685 chr14 | 14 | 104766812 | 104778505 | 11694  | 145 | -0.562562 | 0.009591 | 104766457 | 104767167 | 104778286 | 104778727 |
| 405 NA18564 | [2515685 chr15 | 15 | 18528334  | 18535414  | 7081   | 7   | 0.260689  | 0.041232 | 18527618  | 18529050  | 18535052  | 18535771  |
| 406 NA18564 | [2515685 chr15 | 15 | 18807293  | 18894799  | 87507  | 93  | 0.334779  | 0.015543 | 18804971  | 18809603  | 18894022  | 18895577  |
| 407 NA18564 | [2515685 chr15 | 15 | 19091518  | 19470416  | 378899 | 471 | 0.32594   | 0.006502 | 19091509  | 19091528  | 19469782  | 19471057  |
| 408 NA18564 | [2515685 chr15 | 15 | 19543151  | 19547258  | 4108   | 5   | 0.263656  | 0.045051 | 19542863  | 19543440  | 19546893  | 19547627  |
| 409 NA18564 | [2515685 chr15 | 15 | 19767746  | 19916618  | 148873 | 159 | 0.473591  | 0.011153 | 19767284  | 19768209  | 19916422  | 19916812  |
| 410 NA18564 | [2515685 chr15 | 15 | 19976034  | 20094958  | 118925 | 123 | 0.284794  | 0.012953 | 19975765  | 19976303  | 20092648  | 20197787  |
| 411 NA18564 | [2515685 chr15 | 15 | 20299474  | 20300040  | 567    | 3   | 0.333152  | 0.064066 | 20299304  | 20299644  | 20299928  | 20300157  |
| 412 NA18564 | [2515685 chr15 | 15 | 20952615  | 20953220  | 606    | 4   | 0.334113  | 0.054384 | 20952542  | 20952688  | 20953050  | 20953391  |
| 413 NA18564 | [2515685 chr15 | 15 | 21050351  | 21065489  | 15139  | 16  | 0.41683   | 0.030893 | 21050342  | 21050361  | 21065210  | 21065767  |
| 414 NA18564 | [2515685 chr15 | 15 | 21118398  | 21119003  | 606    | 4   | 0.334113  | 0.054384 | 21118325  | 21118471  | 21118833  | 21119177  |
| 415 NA18564 | [2515685 chr15 | 15 | 21606753  | 21614608  | 7856   | 7   | 0.813599  | 0.062565 | 21606459  | 21607047  | 21612298  | 21636697  |
| 416 NA18564 | [2515685 chr15 | 15 | 23482566  | 23483671  | 1106   | 2   | 0.811005  | 0.085432 | 23482224  | 23482908  | 23483437  | 23483901  |
| 417 NA18564 | [2515685 chr15 | 15 | 24986053  | 24992250  | 6198   | 7   | 0.891062  | 0.061547 | 24985426  | 24986680  | 24991680  | 24992821  |
| 418 NA18564 | [2515685 chr15 | 15 | 26263874  | 26264479  | 606    | 4   | 0.334113  | 0.054384 | 26263801  | 26263947  | 26264309  | 26264647  |
| 419 NA18564 | [2515685 chr15 | 15 | 26610077  | 26610682  | 606    | 4   | 0.334113  | 0.054384 | 26609907  | 26610247  | 26610609  | 26610757  |
| 420 NA18564 | [2515685 chr15 | 15 | 27133610  | 27134889  | 1280   | 4   | 0.408625  | 0.074131 | 27133306  | 27133914  | 27134660  | 27135117  |
| 421 NA18564 | [2515685 chr15 | 15 | 32467956  | 32654853  | 186898 | 190 | 0.348342  | 0.009505 | 32467391  | 32468521  | 32654165  | 32655547  |
| 422 NA18564 | [2515685 chr15 | 15 | 43106208  | 43111174  | 4967   | 6   | 0.372391  | 0.058737 | 43105919  | 43106498  | 43111071  | 43111277  |
| 423 NA18564 | [2515685 chr15 | 15 | 59490762  | 59495993  | 5232   | 2   | -0.664211 | 0.108341 | 59490146  | 59491378  | 59494114  | 59497877  |
| 424 NA18564 | [2515685 chr15 | 15 | 74671388  | 74682828  | 11441  | 9   | 0.867108  | 0.053988 | 74671122  | 74671654  | 74680518  | 74689517  |
| 425 NA18564 | [2515685 chr15 | 15 | 75117585  | 75119946  | 2362   | 4   | 0.883397  | 0.07425  | 75117343  | 75117827  | 75119741  | 75120157  |
| 426 NA18564 | [2515685 chr15 | 15 | 82333041  | 82335194  | 2154   | 2   | -0.742465 | 0.103921 | 82332284  | 82333799  | 82334729  | 82335667  |
| 427 NA18564 | [2515685 chr15 | 15 | 100109640 | 100122682 | 13043  | 98  | 0.98425   | 0.01243  | 100108905 | 100110376 | 100122315 | 100123057 |
| 428 NA18564 | [2515685 chr16 | 16 | 1064802   | 1066359   | 1558   | 2   | 0.622204  | 0.101604 | 1064465   | 1065139   | 1065803   | 10669167  |
| 429 NA18564 | [2515685 chr16 | 16 | 14955818  | 15031089  | 75272  | 69  | -0.265685 | 0.01747  | 14955356  | 14956281  | 15030750  | 15031427  |
| 430 NA18564 | [2515685 chr16 | 16 | 16633469  | 16639120  | 5652   | 4   | 0.969175  | 0.076665 | 16632502  | 16634437  | 16638386  | 16639857  |
| 431 NA18564 | [2515685 chr16 | 16 | 18010627  | 18016356  | 5730   | 4   | -0.361211 | 0.066502 | 18010196  | 18011059  | 18016027  | 18016681  |
| 432 NA18564 | [2515685 chr16 | 16 | 18806894  | 18825134  | 18241  | 30  | -0.345915 | 0.024081 | 18806658  | 18807131  | 18824914  | 18825357  |
| 433 NA18564 | [2515685 chr16 | 16 | 18838214  | 18849371  | 11158  | 14  | -0.273395 | 0.037839 | 18837819  | 18838610  | 18848563  | 18850181  |
| 434 NA18564 | [2515685 chr16 | 16 | 21394481  | 21502620  | 108140 | 136 | -0.295036 | 0.010994 | 21394254  | 21394708  | 21501101  | 21504147  |
| 435 NA18564 | [2515685 chr16 | 16 | 21649895  | 21715522  | 65628  | 62  | -0.253975 | 0.015339 | 21649570  | 21650221  | 21714379  | 21716661  |
| 436 NA18564 | [2515685 chr16 | 16 | 21826273  | 21851244  | 24972  | 57  | -0.366179 | 0.015872 | 21826045  | 21826501  | 21850870  | 21851617  |
| 437 NA18564 | [2515685 chr16 | 16 | 22292900  | 22293972  | 1073   | 2   | 0.501859  | 0.085208 | 22292689  | 22293111  | 22293590  | 22294357  |
| 438 NA18564 | [2515685 chr16 | 16 | 22356273  | 22382123  | 25851  | 60  | -0.365909 | 0.015737 | 22355697  | 22356849  | 22381925  | 22382327  |
| 439 NA18564 | [2515685 chr16 | 16 | 22465989  | 22618743  | 152755 | 139 | -0.390259 | 0.011396 | 22465691  | 22466287  | 22617181  | 22620301  |
| 440 NA18564 | [2515685 chr16 | 16 | 28522768  | 28525408  | 2641   | 3   | -0.994293 | 0.082065 | 28522366  | 28523170  | 28525115  | 28525707  |
| 441 NA18564 | [2515685 chr16 | 16 | 28528415  | 28530590  | 2176   | 3   | -0.658178 | 0.081439 | 28528196  | 28528634  | 28529733  | 28531447  |
| 442 NA18564 | [2515685 chr16 | 16 | 29475340  | 29495366  | 20027  | 32  | -0.260407 | 0.01582  | 29475322  | 29475359  | 29494626  | 29496107  |
| 443 NA18564 | [2515685 chr16 | 16 | 29507127  | 29522060  | 14934  | 20  | -0.260407 | 0.01582  | 29506772  | 29507482  | 29521784  | 29522337  |
| 444 NA18564 | [2515685 chr16 | 16 | 30215033  | 30235324  | 20292  | 33  | -0.328819 | 0.02209  | 30215008  | 30215059  | 30234798  | 30235857  |
| 445 NA18564 | [2515685 chr16 | 16 | 30247239  | 30253434  | 6196   | 10  | -0.356137 | 0.041769 | 30246841  | 30247637  | 30253009  | 30253867  |
| 446 NA18564 | [2515685 chr16 | 16 | 31869887  | 31875862  | 5976   | 11  | -0.257624 | 0.043292 | 31869805  | 31869970  | 31875581  | 31876147  |

|             |                |    |          |          |        |     |           |          |          |          |          |          |
|-------------|----------------|----|----------|----------|--------|-----|-----------|----------|----------|----------|----------|----------|
| 447 NA18564 | [2515685 chr16 | 16 | 31900721 | 31901605 | 885    | 2   | 0.499778  | 0.099913 | 31900500 | 31900942 | 31901267 | 3190194: |
| 448 NA18564 | [2515685 chr16 | 16 | 32150890 | 32152933 | 2044   | 4   | -0.281674 | 0.052856 | 32150057 | 32151724 | 32152679 | 3215318: |
| 449 NA18564 | [2515685 chr16 | 16 | 32154214 | 32197170 | 42957  | 98  | -0.384825 | 0.012191 | 32154161 | 32154267 | 32196926 | 3219741- |
| 450 NA18564 | [2515685 chr16 | 16 | 32570265 | 32612861 | 42597  | 103 | -0.382121 | 0.011809 | 32570138 | 32570393 | 32612808 | 3261291- |
| 451 NA18564 | [2515685 chr16 | 16 | 32614305 | 32616183 | 1879   | 5   | -0.310032 | 0.049191 | 32614214 | 32614396 | 32615350 | 3261701: |
| 452 NA18564 | [2515685 chr16 | 16 | 33091854 | 33093897 | 2044   | 4   | -0.281674 | 0.052856 | 33091021 | 33092688 | 33093643 | 3309415: |
| 453 NA18564 | [2515685 chr16 | 16 | 33095178 | 33194268 | 99091  | 227 | -0.352574 | 0.007835 | 33095125 | 33095231 | 33194099 | 3319443: |
| 454 NA18564 | [2515685 chr16 | 16 | 33672072 | 33677354 | 5283   | 13  | -0.268277 | 0.039597 | 33671787 | 33672358 | 33676941 | 3367776: |
| 455 NA18564 | [2515685 chr16 | 16 | 34321818 | 34609081 | 287264 | 323 | -0.47552  | 0.00816  | 34317185 | 34323706 | 34607193 | 3461732: |
| 456 NA18564 | [2515685 chr16 | 16 | 54353711 | 54362962 | 9252   | 10  | -0.413093 | 0.049921 | 54353419 | 54354004 | 54362223 | 5436370: |
| 457 NA18564 | [2515685 chr16 | 16 | 54365075 | 54371760 | 6686   | 8   | -0.763844 | 0.05011  | 54364721 | 54365430 | 54370782 | 5437273: |
| 458 NA18564 | [2515685 chr16 | 16 | 54399675 | 54422911 | 23237  | 29  | 0.252379  | 0.028254 | 54399445 | 54399906 | 54422635 | 5442318: |
| 459 NA18564 | [2515685 chr16 | 16 | 57204541 | 57207585 | 3045   | 3   | 5.355834  | 0.220611 | 57204170 | 57204913 | 57206938 | 5720823: |
| 460 NA18564 | [2515685 chr16 | 16 | 68702274 | 68789580 | 87307  | 121 | 0.317259  | 0.012459 | 68701593 | 68702955 | 68789287 | 6878987: |
| 461 NA18564 | [2515685 chr16 | 16 | 72920370 | 72966135 | 45766  | 43  | 0.345212  | 0.021793 | 72919818 | 72920922 | 72966079 | 7296619: |
| 462 NA18564 | [2515685 chr16 | 16 | 76928915 | 76942282 | 13368  | 11  | 0.625998  | 0.043502 | 76928609 | 76929221 | 76941602 | 7694296: |
| 463 NA18564 | [2515685 chr16 | 16 | 83994929 | 84004171 | 9243   | 81  | 0.506814  | 0.013397 | 83994558 | 83995300 | 84003767 | 8400457: |
| 464 NA18564 | [2515685 chr16 | 16 | 84562720 | 84565235 | 2516   | 11  | 0.486264  | 0.048742 | 84561685 | 84563756 | 84565142 | 8456532: |
| 465 NA18564 | [2515685 chr17 | 17 | 966845   | 970150   | 3306   | 21  | 0.339732  | 0.034117 | 966537   | 967154   | 969378   | 970922   |
| 466 NA18564 | [2515685 chr17 | 17 | 14984685 | 14999596 | 14912  | 15  | -0.93597  | 0.041884 | 14984106 | 14985264 | 14999318 | 1499987: |
| 467 NA18564 | [2515685 chr17 | 17 | 18299050 | 18311209 | 12160  | 19  | 0.361801  | 0.033099 | 18298294 | 18299807 | 18310937 | 1831148: |
| 468 NA18564 | [2515685 chr17 | 17 | 18331739 | 18332345 | 607    | 2   | -0.880906 | 0.097723 | 18331509 | 18331970 | 18331978 | 1833271: |
| 469 NA18564 | [2515685 chr17 | 17 | 18973847 | 18975099 | 1253   | 4   | -0.425532 | 0.06717  | 18973422 | 18974272 | 18974722 | 1897547: |
| 470 NA18564 | [2515685 chr17 | 17 | 20299935 | 20300531 | 597    | 2   | -0.880904 | 0.097723 | 20299568 | 20300303 | 20300311 | 2030075: |
| 471 NA18564 | [2515685 chr17 | 17 | 20325192 | 20325864 | 673    | 2   | 0.655038  | 0.084541 | 20324968 | 20325416 | 20325582 | 2032614: |
| 472 NA18564 | [2515685 chr17 | 17 | 31437744 | 31439351 | 1608   | 3   | 0.605176  | 0.067505 | 31437542 | 31437946 | 31439129 | 3143957: |
| 473 NA18564 | [2515685 chr17 | 17 | 31452761 | 31454743 | 1983   | 3   | 0.670006  | 0.076643 | 31451860 | 31453663 | 31454515 | 3145497: |
| 474 NA18564 | [2515685 chr17 | 17 | 31535982 | 31547218 | 11237  | 19  | 0.556892  | 0.024861 | 31535106 | 31536858 | 31546915 | 3154752: |
| 475 NA18564 | [2515685 chr17 | 17 | 31624042 | 31648792 | 24751  | 36  | 0.514978  | 0.017933 | 31623164 | 31624920 | 31648489 | 3164909: |
| 476 NA18564 | [2515685 chr17 | 17 | 31847598 | 31865078 | 17481  | 5   | 0.535468  | 0.056717 | 31844510 | 31849808 | 31864350 | 3186580: |
| 477 NA18564 | [2515685 chr17 | 17 | 32829500 | 32833231 | 3732   | 5   | 0.843428  | 0.076457 | 32828825 | 32830175 | 32832670 | 3283379: |
| 478 NA18564 | [2515685 chr17 | 17 | 33324385 | 33341894 | 17510  | 6   | 0.536697  | 0.052933 | 33323841 | 33324930 | 33339684 | 3334498: |
| 479 NA18564 | [2515685 chr17 | 17 | 33562321 | 33585313 | 22993  | 13  | 0.436713  | 0.034676 | 33561930 | 33562713 | 33584586 | 3358604: |
| 480 NA18564 | [2515685 chr17 | 17 | 36675530 | 36685343 | 9814   | 10  | -2.709054 | 0.079615 | 36675011 | 36676049 | 36684647 | 3668604: |
| 481 NA18564 | [2515685 chr17 | 17 | 36898029 | 36982743 | 84715  | 99  | 0.416473  | 0.012416 | 36897743 | 36898316 | 36982183 | 3698330: |
| 482 NA18564 | [2515685 chr17 | 17 | 36988318 | 36991957 | 3640   | 5   | 0.416473  | 0.012416 | 36988009 | 36988628 | 36991285 | 3699263: |
| 483 NA18564 | [2515685 chr17 | 17 | 36999130 | 37016854 | 17725  | 16  | 0.416473  | 0.012416 | 36998799 | 36999462 | 37014738 | 3701897: |
| 484 NA18564 | [2515685 chr17 | 17 | 40943910 | 40964418 | 20509  | 23  | 0.377615  | 0.026606 | 40943511 | 40944309 | 40964370 | 4096446: |
| 485 NA18564 | [2515685 chr17 | 17 | 41006614 | 41017119 | 10506  | 13  | -0.332754 | 0.040811 | 41006215 | 41007013 | 41016872 | 4101736: |
| 486 NA18564 | [2515685 chr17 | 17 | 41035524 | 41036525 | 1002   | 2   | 0.563719  | 0.099321 | 41035120 | 41035928 | 41035967 | 4103708: |
| 487 NA18564 | [2515685 chr17 | 17 | 41675037 | 41676708 | 1672   | 2   | 0.56372   | 0.099321 | 41673805 | 41676270 | 41676309 | 4167710: |
| 488 NA18564 | [2515685 chr17 | 17 | 41742907 | 42137420 | 394514 | 435 | 0.458276  | 0.00566  | 41742762 | 41743052 | 42135210 | 4214194: |
| 489 NA18564 | [2515685 chr17 | 17 | 42447034 | 42487040 | 40007  | 68  | 0.25793   | 0.015782 | 42447009 | 42447059 | 42486638 | 4248744: |
| 490 NA18564 | [2515685 chr17 | 17 | 60282198 | 60300234 | 18037  | 24  | 0.338227  | 0.026793 | 60281919 | 60282477 | 60298024 | 6030413: |
| 491 NA18564 | [2515685 chr18 | 18 | 9805250  | 9806206  | 957    | 2   | -1.404966 | 0.119972 | 9804637  | 9805863  | 9806038  | 980637-  |
| 492 NA18564 | [2515685 chr18 | 18 | 14172514 | 14177894 | 5381   | 9   | 0.28838   | 0.046798 | 14172152 | 14172877 | 14177639 | 1417814: |
| 493 NA18564 | [2515685 chr18 | 18 | 14546863 | 14575965 | 29103  | 29  | 0.42384   | 0.025782 | 14546541 | 14547186 | 14575054 | 1457687: |
| 494 NA18564 | [2515685 chr18 | 18 | 14702025 | 14703577 | 1553   | 2   | -0.677918 | 0.116211 | 14701431 | 14702619 | 14703103 | 1470405: |
| 495 NA18564 | [2515685 chr18 | 18 | 28142218 | 28143399 | 1182   | 2   | 0.694872  | 0.118695 | 28141854 | 28142583 | 28143055 | 2814374: |
| 496 NA18564 | [2515685 chr18 | 18 | 42797012 | 42815399 | 18388  | 21  | -0.392389 | 0.02798  | 42796537 | 42797488 | 42810800 | 4288915: |
| 497 NA18564 | [2515685 chr18 | 18 | 61917747 | 61920171 | 2425   | 4   | 3.067834  | 0.138926 | 61917522 | 61917973 | 61919646 | 6192069: |
| 498 NA18564 | [2515685 chr18 | 18 | 64896052 | 64905447 | 9396   | 10  | -4.069292 | 0.098014 | 64894789 | 64897315 | 64904764 | 6490613: |
| 499 NA18564 | [2515685 chr18 | 18 | 64905447 | 64907736 | 2290   | 3   | -1.601486 | 0.127296 | 64904764 | 64906130 | 64907228 | 6490824: |
| 500 NA18564 | [2515685 chr18 | 18 | 74231104 | 74234275 | 3172   | 30  | 0.27411   | 0.017556 | 74230952 | 74231256 | 74234139 | 7423441: |
| 501 NA18564 | [2515685 chr18 | 18 | 74373005 | 74379534 | 6530   | 10  | 0.383976  | 0.034839 | 74372064 | 74373947 | 74378860 | 7438020: |

|             |                |    |          |          |        |     |           |          |          |          |          |          |
|-------------|----------------|----|----------|----------|--------|-----|-----------|----------|----------|----------|----------|----------|
| 502 NA18564 | [2515685 chr18 | 18 | 74392800 | 74398225 | 5426   | 4   | 0.581964  | 0.073248 | 74390826 | 74394774 | 74397790 | 74398660 |
| 503 NA18564 | [2515685 chr19 | 19 | 310414   | 312953   | 2540   | 14  | -0.474347 | 0.037087 | 309687   | 311142   | 312913   | 312994   |
| 504 NA18564 | [2515685 chr19 | 19 | 1352259  | 1353860  | 1602   | 2   | 0.695311  | 0.123339 | 1351723  | 1352795  | 1353360  | 1354367  |
| 505 NA18564 | [2515685 chr19 | 19 | 8243623  | 8272250  | 28628  | 16  | 0.363286  | 0.030253 | 8242830  | 8244417  | 8271784  | 8272717  |
| 506 NA18564 | [2515685 chr19 | 19 | 8708780  | 8760468  | 51689  | 89  | 1.043547  | 0.011016 | 8708296  | 8709264  | 8760209  | 8760727  |
| 507 NA18564 | [2515685 chr19 | 19 | 8760468  | 8763535  | 3068   | 5   | 0.455819  | 0.059798 | 8760209  | 8760727  | 8763160  | 8763917  |
| 508 NA18564 | [2515685 chr19 | 19 | 20590678 | 20594162 | 3485   | 4   | 1.21252   | 0.110023 | 20588542 | 20592814 | 20593683 | 20594647 |
| 509 NA18564 | [2515685 chr19 | 19 | 22626324 | 22627831 | 1508   | 2   | -0.849181 | 0.117558 | 22626147 | 22626502 | 22627729 | 22627937 |
| 510 NA18564 | [2515685 chr19 | 19 | 22781574 | 22783034 | 1461   | 2   | 0.744882  | 0.142186 | 22781294 | 22781854 | 22782628 | 22783440 |
| 511 NA18564 | [2515685 chr19 | 19 | 23007893 | 23014812 | 6920   | 7   | 0.776622  | 0.061186 | 22990964 | 23010431 | 23014157 | 23015461 |
| 512 NA18564 | [2515685 chr19 | 19 | 23227558 | 23230759 | 3202   | 4   | -0.426869 | 0.069096 | 23226708 | 23228409 | 23229991 | 23231527 |
| 513 NA18564 | [2515685 chr19 | 19 | 24147959 | 24148730 | 772    | 3   | 0.409128  | 0.079434 | 24147835 | 24148083 | 24148193 | 24149267 |
| 514 NA18564 | [2515685 chr19 | 19 | 39419837 | 39421349 | 1513   | 3   | 0.69729   | 0.09875  | 39419616 | 39420059 | 39421018 | 39421687 |
| 515 NA18564 | [2515685 chr19 | 19 | 40540866 | 40541878 | 1013   | 3   | -0.762355 | 0.085219 | 40540646 | 40541086 | 40541551 | 40542201 |
| 516 NA18564 | [2515685 chr19 | 19 | 40543556 | 40545135 | 1580   | 3   | -3.450525 | 0.178796 | 40543292 | 40543821 | 40544782 | 40545488 |
| 517 NA18564 | [2515685 chr19 | 19 | 40547370 | 40553596 | 6227   | 2   | -4.793136 | 0.274605 | 40546632 | 40548109 | 40553353 | 40553844 |
| 518 NA18564 | [2515685 chr19 | 19 | 40553596 | 40554347 | 752    | 2   | -0.560009 | 0.093539 | 40553353 | 40553840 | 40554020 | 40554671 |
| 519 NA18564 | [2515685 chr19 | 19 | 43974792 | 43977294 | 2503   | 2   | -0.531231 | 0.099949 | 43974369 | 43975216 | 43975620 | 43978961 |
| 520 NA18564 | [2515685 chr19 | 19 | 45412775 | 45413556 | 782    | 2   | -0.516081 | 0.099699 | 45412566 | 45412985 | 45413285 | 45413827 |
| 521 NA18564 | [2515685 chr19 | 19 | 53098479 | 53154327 | 55849  | 104 | -0.285326 | 0.005279 | 53098017 | 53098941 | 53152350 | 53156301 |
| 522 NA18564 | [2515685 chr19 | 19 | 55285877 | 55336157 | 50281  | 104 | -0.285326 | 0.005279 | 55285730 | 55286025 | 55335244 | 55337071 |
| 523 NA18564 | [2515685 chr19 | 19 | 56824939 | 56840752 | 15814  | 17  | -0.670816 | 0.036383 | 56824709 | 56825170 | 56840372 | 56841133 |
| 524 NA18564 | [2515685 chr19 | 19 | 58169057 | 58171564 | 2508   | 2   | 0.500267  | 0.092101 | 58168791 | 58169324 | 58171021 | 58172107 |
| 525 NA18564 | [2515685 chr19 | 19 | 58210435 | 58244458 | 34024  | 26  | -0.791352 | 0.030306 | 58209863 | 58211007 | 58243893 | 58245027 |
| 526 NA18564 | [2515685 chr19 | 19 | 59247755 | 59252061 | 4307   | 5   | 0.824474  | 0.071472 | 59246427 | 59249084 | 59251854 | 59252268 |
| 527 NA18564 | [2515685 chr19 | 19 | 59417912 | 59436244 | 18333  | 24  | 0.393211  | 0.027515 | 59417566 | 59418258 | 59435978 | 59436517 |
| 528 NA18564 | [2515685 chr19 | 19 | 60958920 | 60976029 | 17110  | 15  | -0.497477 | 0.037336 | 60957933 | 60959907 | 60975748 | 60976311 |
| 529 NA18564 | [2515685 chr20 | 20 | 1511097  | 1532477  | 21381  | 26  | -2.253186 | 0.04782  | 1510534  | 1511660  | 1532182  | 1532773  |
| 530 NA18564 | [2515685 chr20 | 20 | 1533575  | 1537053  | 3479   | 8   | -0.289071 | 0.042717 | 1533384  | 1533766  | 1536863  | 1537244  |
| 531 NA18564 | [2515685 chr20 | 20 | 15249645 | 15251805 | 2161   | 2   | -0.869813 | 0.108526 | 15249381 | 15249909 | 15251287 | 15252323 |
| 532 NA18564 | [2515685 chr20 | 20 | 59951513 | 59957050 | 5538   | 18  | 0.951172  | 0.036277 | 59950681 | 59952345 | 59956538 | 59957566 |
| 533 NA18564 | [2515685 chr20 | 20 | 61770772 | 61773337 | 2566   | 14  | 0.365549  | 0.040648 | 61770072 | 61771473 | 61772214 | 61774461 |
| 534 NA18564 | [2515685 chr20 | 20 | 62020824 | 62021986 | 1163   | 6   | 0.315042  | 0.062372 | 62020358 | 62021291 | 62021710 | 62022266 |
| 535 NA18564 | [2515685 chr20 | 20 | 62066380 | 62068214 | 1835   | 8   | 1.840989  | 0.065103 | 62066146 | 62066615 | 62067671 | 62068751 |
| 536 NA18564 | [2515685 chr21 | 21 | 13738548 | 13739792 | 1245   | 2   | -1.020055 | 0.125427 | 13738070 | 13739027 | 13739487 | 13740091 |
| 537 NA18564 | [2515685 chr21 | 21 | 13856946 | 13861837 | 4892   | 4   | 0.475604  | 0.076229 | 13856729 | 13857163 | 13861239 | 13862431 |
| 538 NA18564 | [2515685 chr21 | 21 | 13869695 | 13888998 | 19304  | 21  | 0.3902    | 0.031894 | 13869290 | 13870100 | 13888658 | 13889331 |
| 539 NA18564 | [2515685 chr21 | 21 | 14197493 | 14203866 | 6374   | 6   | -0.29494  | 0.056918 | 14194870 | 14200116 | 14203389 | 14204343 |
| 540 NA18564 | [2515685 chr22 | 22 | 14480809 | 14480937 | 129    | 2   | 0.728669  | 0.115776 | 14480758 | 14480860 | 14480862 | 14481017 |
| 541 NA18564 | [2515685 chr22 | 22 | 17032140 | 17129692 | 97553  | 147 | -0.299365 | 0.010926 | 17031480 | 17032801 | 17129458 | 17129927 |
| 542 NA18564 | [2515685 chr22 | 22 | 17225268 | 17237406 | 12139  | 28  | -0.331304 | 0.024955 | 17224868 | 17225668 | 17237316 | 17237497 |
| 543 NA18564 | [2515685 chr22 | 22 | 17385504 | 17397941 | 12438  | 22  | -0.252987 | 0.031426 | 17385031 | 17385977 | 17397517 | 17398361 |
| 544 NA18564 | [2515685 chr22 | 22 | 18689526 | 19032736 | 343211 | 347 | -0.254898 | 0.004133 | 18686307 | 18692211 | 19032008 | 19033461 |
| 545 NA18564 | [2515685 chr22 | 22 | 19380073 | 19889869 | 509797 | 229 | -0.254898 | 0.004133 | 19377752 | 19382395 | 19888321 | 19891411 |
| 546 NA18564 | [2515685 chr22 | 22 | 19910072 | 19959204 | 49133  | 73  | -0.254898 | 0.004133 | 19909805 | 19910340 | 19958770 | 19959631 |
| 547 NA18564 | [2515685 chr22 | 22 | 19973569 | 20243646 | 270078 | 391 | -0.254898 | 0.004133 | 19972287 | 19974851 | 20240961 | 20302228 |
| 548 NA18564 | [2515685 chr22 | 22 | 22671590 | 22683930 | 12341  | 12  | 0.752675  | 0.046895 | 22671248 | 22671933 | 22681309 | 22686557 |
| 549 NA18564 | [2515685 chr22 | 22 | 22683930 | 22688523 | 4594   | 3   | -0.744022 | 0.093654 | 22681309 | 22686552 | 22687378 | 22689661 |
| 550 NA18564 | [2515685 chr22 | 22 | 22690382 | 22691501 | 1120   | 2   | 1.927037  | 0.13546  | 22690146 | 22690619 | 22691088 | 22691917 |
| 551 NA18564 | [2515685 chr22 | 22 | 22695407 | 22720154 | 24748  | 27  | 1.069624  | 0.036022 | 22695112 | 22695703 | 22719882 | 22720421 |
| 552 NA18564 | [2515685 chr22 | 22 | 33619409 | 33622591 | 3183   | 4   | 0.909582  | 0.079856 | 33618939 | 33619879 | 33622541 | 33622647 |
| 553 NA18564 | [2515685 chr22 | 22 | 41215751 | 41279753 | 64003  | 54  | 0.28295   | 0.018415 | 41215148 | 41216355 | 41278713 | 41280797 |
| 1 NA19221   | [2515685 chr1  | 1  | 897      | 77845    | 76949  | 120 | 0.515156  | 0.018469 | 1        | 1794     | 77684    | 78006    |
| 2 NA19221   | [2515685 chr1  | 1  | 586558   | 587572   | 1015   | 5   | 0.803452  | 0.09048  | 586293   | 586824   | 587344   | 587800   |
| 3 NA19221   | [2515685 chr1  | 1  | 601036   | 612159   | 11124  | 8   | -1.29685  | 0.07153  | 587801   | 604315   | 610122   | 614196   |

|    |         |               |   |           |           |        |     |           |          |           |           |           |           |
|----|---------|---------------|---|-----------|-----------|--------|-----|-----------|----------|-----------|-----------|-----------|-----------|
| 4  | NA19221 | [2515685 chr1 | 1 | 874312    | 1740374   | 866063 | 840 | 0.279956  | 0.006989 | 873971    | 874654    | 1739938   | 1740817   |
| 5  | NA19221 | [2515685 chr1 | 1 | 5409588   | 5410676   | 1089   | 2   | 0.74147   | 0.143061 | 5409296   | 5409881   | 5410277   | 5411076   |
| 6  | NA19221 | [2515685 chr1 | 1 | 10385618  | 10394285  | 8668   | 4   | 0.531376  | 0.101159 | 10385180  | 10386056  | 10393865  | 10394701  |
| 7  | NA19221 | [2515685 chr1 | 1 | 12829971  | 12849129  | 19159  | 29  | 0.347286  | 0.03757  | 12829669  | 12830274  | 12848769  | 12849491  |
| 8  | NA19221 | [2515685 chr1 | 1 | 12884744  | 12886858  | 2115   | 3   | 0.633625  | 0.116809 | 12884434  | 12885054  | 12886536  | 12887181  |
| 9  | NA19221 | [2515685 chr1 | 1 | 12888170  | 12926542  | 38373  | 85  | 0.313246  | 0.021945 | 12887909  | 12888432  | 12926307  | 12926771  |
| 10 | NA19221 | [2515685 chr1 | 1 | 12926542  | 12926956  | 415    | 2   | -1.531984 | 0.152891 | 12926307  | 12926778  | 12926804  | 12927101  |
| 11 | NA19221 | [2515685 chr1 | 1 | 13086012  | 13091899  | 5888   | 3   | -0.82663  | 0.116809 | 13085102  | 13086922  | 13091561  | 13092231  |
| 12 | NA19221 | [2515685 chr1 | 1 | 13114053  | 13152117  | 38065  | 77  | 0.328387  | 0.023056 | 13114298  | 13114298  | 13151738  | 13152491  |
| 13 | NA19221 | [2515685 chr1 | 1 | 13159940  | 13162071  | 2132   | 3   | 0.662999  | 0.116809 | 13159618  | 13160263  | 13161777  | 13162361  |
| 14 | NA19221 | [2515685 chr1 | 1 | 13292736  | 13372914  | 80179  | 46  | 0.364912  | 0.02983  | 13292111  | 13293362  | 13372535  | 13373291  |
| 15 | NA19221 | [2515685 chr1 | 1 | 13380737  | 13382868  | 2132   | 3   | 0.662999  | 0.116809 | 13380415  | 13381060  | 13382574  | 13383161  |
| 16 | NA19221 | [2515685 chr1 | 1 | 13507934  | 13526542  | 18609  | 20  | 0.253204  | 0.04524  | 13507788  | 13508080  | 13525583  | 13527501  |
| 17 | NA19221 | [2515685 chr1 | 1 | 16582897  | 16593950  | 11054  | 12  | 0.377957  | 0.058404 | 16582310  | 16583485  | 16593312  | 16594581  |
| 18 | NA19221 | [2515685 chr1 | 1 | 16604440  | 16833315  | 228876 | 350 | 0.318352  | 0.010815 | 16604025  | 16604856  | 16832899  | 16833731  |
| 19 | NA19221 | [2515685 chr1 | 1 | 16922617  | 16940620  | 18004  | 30  | 0.371927  | 0.036938 | 16922326  | 16922908  | 16940202  | 16941031  |
| 20 | NA19221 | [2515685 chr1 | 1 | 21483287  | 21540026  | 56740  | 59  | 0.293601  | 0.026411 | 21483049  | 21483526  | 21539370  | 21540681  |
| 21 | NA19221 | [2515685 chr1 | 1 | 25371139  | 25391148  | 20010  | 19  | 0.268679  | 0.046415 | 25370398  | 25371880  | 25390773  | 25391521  |
| 22 | NA19221 | [2515685 chr1 | 1 | 31706808  | 31755482  | 48675  | 45  | 0.275873  | 0.03016  | 31705994  | 31707623  | 31755050  | 31755911  |
| 23 | NA19221 | [2515685 chr1 | 1 | 62147249  | 62164151  | 16903  | 15  | -0.960055 | 0.052543 | 62145925  | 62148574  | 62163078  | 62165221  |
| 24 | NA19221 | [2515685 chr1 | 1 | 72467674  | 72476358  | 8685   | 5   | -1.073102 | 0.092701 | 72467220  | 72468129  | 72475692  | 72477702  |
| 25 | NA19221 | [2515685 chr1 | 1 | 75792189  | 75794628  | 2440   | 5   | 0.47056   | 0.090479 | 75791976  | 75792402  | 75794455  | 75794801  |
| 26 | NA19221 | [2515685 chr1 | 1 | 75798184  | 75830974  | 32791  | 38  | -0.925779 | 0.033121 | 75797427  | 75798942  | 75830636  | 75831311  |
| 27 | NA19221 | [2515685 chr1 | 1 | 75831836  | 75835989  | 4154   | 2   | -0.838362 | 0.143061 | 75831313  | 75832359  | 75832710  | 75840661  |
| 28 | NA19221 | [2515685 chr1 | 1 | 89188117  | 89190762  | 2646   | 4   | 0.2032495 | 0.126799 | 89187764  | 89188470  | 89190458  | 89191061  |
| 29 | NA19221 | [2515685 chr1 | 1 | 95465170  | 95470130  | 4961   | 2   | -0.791454 | 0.14306  | 95464764  | 95465576  | 95466851  | 95479271  |
| 30 | NA19221 | [2515685 chr1 | 1 | 96198206  | 96200558  | 2353   | 4   | -0.63802  | 0.101158 | 96197849  | 96198563  | 96200356  | 96200761  |
| 31 | NA19221 | [2515685 chr1 | 1 | 103815990 | 103857352 | 41363  | 61  | 0.382425  | 0.025915 | 103815802 | 103816179 | 103857039 | 10385766  |
| 32 | NA19221 | [2515685 chr1 | 1 | 108444641 | 108449550 | 4910   | 9   | 0.773837  | 0.06744  | 108443817 | 108445466 | 108449224 | 108449871 |
| 33 | NA19221 | [2515685 chr1 | 1 | 108526551 | 108528751 | 2201   | 9   | 0.533441  | 0.06744  | 108526381 | 108526722 | 108528671 | 108528831 |
| 34 | NA19221 | [2515685 chr1 | 1 | 108674954 | 108677151 | 2198   | 9   | 0.533441  | 0.06744  | 108674873 | 108675035 | 108676981 | 108677321 |
| 35 | NA19221 | [2515685 chr1 | 1 | 109935157 | 109950550 | 15394  | 21  | 0.380698  | 0.044316 | 109935040 | 109935275 | 109949935 | 109951161 |
| 36 | NA19221 | [2515685 chr1 | 1 | 112405902 | 112416691 | 10790  | 9   | 0.872012  | 0.06744  | 112405415 | 112406389 | 112416423 | 112416961 |
| 37 | NA19221 | [2515685 chr1 | 1 | 120322812 | 120326272 | 3461   | 7   | 0.3886    | 0.07647  | 120322585 | 120323040 | 120326067 | 120326471 |
| 38 | NA19221 | [2515685 chr1 | 1 | 120521070 | 120521557 | 488    | 3   | 0.665459  | 0.116809 | 120520711 | 120521430 | 120521547 | 120521561 |
| 39 | NA19221 | [2515685 chr1 | 1 | 120527658 | 120529698 | 2041   | 30  | 0.400732  | 0.036938 | 120527644 | 120527673 | 120529686 | 120529711 |
| 40 | NA19221 | [2515685 chr1 | 1 | 120699768 | 120718288 | 18521  | 30  | -0.26344  | 0.036938 | 120699503 | 120700034 | 120718032 | 120718541 |
| 41 | NA19221 | [2515685 chr1 | 1 | 141390474 | 141392615 | 2142   | 45  | 0.382803  | 0.03016  | 141390462 | 141390486 | 141392571 | 141392651 |
| 42 | NA19221 | [2515685 chr1 | 1 | 141398495 | 141399110 | 616    | 7   | 0.533075  | 0.076469 | 141398480 | 141398510 | 141398750 | 141399471 |
| 43 | NA19221 | [2515685 chr1 | 1 | 141447471 | 141451528 | 4058   | 10  | -0.261757 | 0.017228 | 141447265 | 141447677 | 141451258 | 141451791 |
| 44 | NA19221 | [2515685 chr1 | 1 | 141464325 | 141549792 | 85468  | 112 | -0.261757 | 0.017228 | 141463946 | 141464705 | 141549239 | 141550341 |
| 45 | NA19221 | [2515685 chr1 | 1 | 141876697 | 141877606 | 910    | 2   | -0.789698 | 0.143061 | 141876675 | 141876720 | 141877195 | 141878011 |
| 46 | NA19221 | [2515685 chr1 | 1 | 142696205 | 142699592 | 3388   | 7   | 0.393393  | 0.076469 | 142696003 | 142696408 | 142699467 | 142699711 |
| 47 | NA19221 | [2515685 chr1 | 1 | 142799987 | 142861573 | 61587  | 226 | 0.319834  | 0.013458 | 142799860 | 142800115 | 142861455 | 142861691 |
| 48 | NA19221 | [2515685 chr1 | 1 | 142960746 | 142963932 | 3187   | 6   | 0.478574  | 0.082596 | 142960564 | 142960929 | 142963785 | 142964071 |
| 49 | NA19221 | [2515685 chr1 | 1 | 143630031 | 143694787 | 64757  | 31  | 0.289671  | 0.036338 | 143629377 | 143630686 | 143694669 | 143694901 |
| 50 | NA19221 | [2515685 chr1 | 1 | 144867781 | 144869728 | 1948   | 6   | 0.428592  | 0.082596 | 144867529 | 144868034 | 144869353 | 144870101 |
| 51 | NA19221 | [2515685 chr1 | 1 | 144888479 | 144904909 | 16431  | 23  | 0.340039  | 0.042186 | 144888103 | 144888856 | 144904493 | 144905321 |
| 52 | NA19221 | [2515685 chr1 | 1 | 145675186 | 145683070 | 7885   | 19  | 0.26561   | 0.046415 | 145675075 | 145675298 | 145682604 | 145683531 |
| 53 | NA19221 | [2515685 chr1 | 1 | 145704645 | 145713347 | 8703   | 13  | 0.354965  | 0.056113 | 145701968 | 145707322 | 145713015 | 145713671 |
| 54 | NA19221 | [2515685 chr1 | 1 | 145814302 | 146244554 | 430253 | 465 | 0.303527  | 0.009388 | 145812747 | 145815857 | 146244527 | 146244581 |
| 55 | NA19221 | [2515685 chr1 | 1 | 146430129 | 146431026 | 898    | 2   | -0.789697 | 0.143061 | 146429730 | 146430528 | 146431003 | 146431041 |
| 56 | NA19221 | [2515685 chr1 | 1 | 149573040 | 149583431 | 10392  | 6   | 0.894439  | 0.082597 | 149572621 | 149573460 | 149582912 | 149583951 |
| 57 | NA19221 | [2515685 chr1 | 1 | 151958456 | 151969505 | 11050  | 12  | 0.477306  | 0.058404 | 151957702 | 151959210 | 151969000 | 151970011 |
| 58 | NA19221 | [2515685 chr1 | 1 | 158295459 | 158306184 | 10726  | 9   | -0.375693 | 0.06744  | 158294850 | 158296068 | 158305545 | 158306821 |

|             |               |   |           |           |        |    |           |          |           |           |           |          |
|-------------|---------------|---|-----------|-----------|--------|----|-----------|----------|-----------|-----------|-----------|----------|
| 59 NA19221  | [2515685 chr1 | 1 | 158326052 | 158369478 | 43427  | 51 | -0.273096 | 0.02833  | 158325732 | 158326372 | 158369240 | 15836971 |
| 60 NA19221  | [2515685 chr1 | 1 | 162153292 | 162156182 | 2891   | 4  | -4.694662 | 0.165539 | 162152935 | 162153650 | 162155733 | 16215663 |
| 61 NA19221  | [2515685 chr1 | 1 | 172867061 | 172871882 | 4822   | 6  | -0.435002 | 0.082596 | 172866720 | 172867402 | 172870192 | 17287357 |
| 62 NA19221  | [2515685 chr1 | 1 | 192585537 | 192587907 | 2371   | 4  | -0.664082 | 0.110518 | 192584855 | 192586219 | 192587682 | 19258813 |
| 63 NA19221  | [2515685 chr1 | 1 | 193443035 | 193448393 | 5359   | 7  | -0.620012 | 0.07933  | 193442791 | 193443280 | 193444156 | 19344863 |
| 64 NA19221  | [2515685 chr1 | 1 | 193452077 | 193552515 | 100439 | 84 | -1.167896 | 0.025303 | 193449476 | 193454678 | 193551981 | 19355305 |
| 65 NA19221  | [2515685 chr1 | 1 | 193612043 | 193650443 | 38401  | 36 | -0.44399  | 0.033725 | 193611792 | 193612295 | 193650245 | 19365064 |
| 66 NA19221  | [2515685 chr1 | 1 | 204229515 | 204234080 | 4566   | 4  | -0.747014 | 0.101161 | 204228648 | 204230383 | 204233127 | 20423503 |
| 67 NA19221  | [2515685 chr1 | 1 | 218762650 | 218768272 | 5623   | 5  | 0.645843  | 0.090481 | 218762212 | 218763089 | 218767017 | 21876952 |
| 68 NA19221  | [2515685 chr1 | 1 | 233202665 | 233204956 | 2292   | 42 | -0.457444 | 0.031218 | 233202312 | 233203018 | 233204364 | 23320554 |
| 69 NA19221  | [2515685 chr1 | 1 | 234289921 | 234291988 | 2068   | 3  | 0.626282  | 0.116809 | 234289605 | 234290238 | 234291759 | 23429221 |
| 70 NA19221  | [2515685 chr1 | 1 | 236719047 | 236720968 | 1922   | 3  | -0.899282 | 0.11681  | 236718751 | 236719344 | 236720749 | 23672118 |
| 71 NA19221  | [2515685 chr1 | 1 | 239368545 | 239481893 | 113349 | 13 | -0.453658 | 0.056113 | 239368239 | 239368851 | 239478614 | 23949135 |
| 72 NA19221  | [2515685 chr1 | 1 | 244943351 | 244944075 | 725    | 2  | 0.909067  | 0.143061 | 244943115 | 244943587 | 244943712 | 24494443 |
| 73 NA19221  | [2515685 chr1 | 1 | 244960293 | 244962187 | 1895   | 3  | 0.715075  | 0.116809 | 244959817 | 244960769 | 244961807 | 24496256 |
| 74 NA19221  | [2515685 chr1 | 1 | 245053742 | 245055036 | 1295   | 2  | -3.333809 | 0.308435 | 245053467 | 245054017 | 245054669 | 24505540 |
| 75 NA19221  | [2515685 chr1 | 1 | 245065841 | 245077953 | 12113  | 5  | -1.516052 | 0.098555 | 245065663 | 245066019 | 245076149 | 24507975 |
| 76 NA19221  | [2515685 chr1 | 1 | 245080091 | 245121920 | 41830  | 47 | -3.172109 | 0.043396 | 245079757 | 245080426 | 245121605 | 24512223 |
| 77 NA19221  | [2515685 chr1 | 1 | 245126671 | 245127478 | 808    | 2  | 0.909068  | 0.143061 | 245126313 | 245127029 | 245127154 | 24512780 |
| 78 NA19221  | [2515685 chr2 | 2 | 296456    | 298925    | 2470   | 8  | -0.56441  | 0.071531 | 296213    | 296699    | 298661    | 299185   |
| 79 NA19221  | [2515685 chr2 | 2 | 4400453   | 4403725   | 3273   | 4  | 0.511269  | 0.101159 | 4399959   | 4400947   | 4403206   | 440424   |
| 80 NA19221  | [2515685 chr2 | 2 | 13290868  | 13292156  | 1289   | 2  | -0.89974  | 0.143061 | 13290667  | 13291069  | 13291579  | 1329273  |
| 81 NA19221  | [2515685 chr2 | 2 | 13325112  | 13331065  | 5954   | 2  | -0.840818 | 0.143061 | 13324820  | 13325405  | 13330626  | 1333150  |
| 82 NA19221  | [2515685 chr2 | 2 | 13460280  | 13548616  | 88337  | 85 | -0.357226 | 0.022114 | 13447121  | 13463238  | 13548319  | 1354891  |
| 83 NA19221  | [2515685 chr2 | 2 | 13650922  | 13657124  | 6203   | 2  | -0.818256 | 0.146627 | 13650259  | 13651585  | 13656818  | 1365743  |
| 84 NA19221  | [2515685 chr2 | 2 | 13660311  | 13669994  | 9684   | 14 | -0.291724 | 0.055445 | 13660120  | 13660502  | 13669696  | 1367029  |
| 85 NA19221  | [2515685 chr2 | 2 | 34606439  | 34644770  | 38332  | 39 | 0.792072  | 0.032783 | 34601818  | 34609397  | 34641812  | 3464839  |
| 86 NA19221  | [2515685 chr2 | 2 | 35492615  | 35529746  | 37132  | 37 | -0.992462 | 0.033846 | 35491400  | 35493831  | 35527391  | 3553210  |
| 87 NA19221  | [2515685 chr2 | 2 | 35962678  | 35963578  | 901    | 2  | -0.746401 | 0.145487 | 35962370  | 35962986  | 35963398  | 3596375  |
| 88 NA19221  | [2515685 chr2 | 2 | 52709754  | 52711487  | 1734   | 5  | 0.460847  | 0.09048  | 52709451  | 52710057  | 52711281  | 5271169  |
| 89 NA19221  | [2515685 chr2 | 2 | 55837914  | 55844424  | 6511   | 4  | 0.716617  | 0.10116  | 55836848  | 55838980  | 55842812  | 5584603  |
| 90 NA19221  | [2515685 chr2 | 2 | 56149788  | 56154834  | 5047   | 7  | -0.418266 | 0.07756  | 56149152  | 56150425  | 56154416  | 5615525  |
| 91 NA19221  | [2515685 chr2 | 2 | 56563619  | 56567381  | 3763   | 2  | 4.553801  | 0.266003 | 56565659  | 56566577  | 56567035  | 5656772  |
| 92 NA19221  | [2515685 chr2 | 2 | 73922476  | 73948487  | 26012  | 42 | -0.494098 | 0.031545 | 73922222  | 73922730  | 73948060  | 7394891  |
| 93 NA19221  | [2515685 chr2 | 2 | 78209922  | 78212440  | 2519   | 4  | -0.591068 | 0.104928 | 78209683  | 78210162  | 78212256  | 7821262  |
| 94 NA19221  | [2515685 chr2 | 2 | 87488932  | 87497574  | 8643   | 10 | 0.37896   | 0.063979 | 87487289  | 87490576  | 87496929  | 8749822  |
| 95 NA19221  | [2515685 chr2 | 2 | 87810218  | 87816797  | 6580   | 11 | 0.439024  | 0.061001 | 87809943  | 87810494  | 87816577  | 8781701  |
| 96 NA19221  | [2515685 chr2 | 2 | 91163362  | 91173255  | 9894   | 16 | 0.323239  | 0.05058  | 91163145  | 91163579  | 91173240  | 9117327  |
| 97 NA19221  | [2515685 chr2 | 2 | 91264557  | 91273380  | 8824   | 21 | 0.32205   | 0.04415  | 91264355  | 91264760  | 91270509  | 9127625  |
| 98 NA19221  | [2515685 chr2 | 2 | 91294608  | 91296867  | 2260   | 10 | 0.368843  | 0.063979 | 91294465  | 91294751  | 91296803  | 9129693  |
| 99 NA19221  | [2515685 chr2 | 2 | 91449919  | 91468383  | 18465  | 12 | 0.319871  | 0.058404 | 91449791  | 91450048  | 91468261  | 9146850  |
| 100 NA19221 | [2515685 chr2 | 2 | 94850556  | 94871889  | 21334  | 11 | 0.494577  | 0.061001 | 94850330  | 94850783  | 94869597  | 9487418  |
| 101 NA19221 | [2515685 chr2 | 2 | 95843510  | 95894621  | 51112  | 16 | 0.380003  | 0.05058  | 95793351  | 95846468  | 95894525  | 9589471  |
| 102 NA19221 | [2515685 chr2 | 2 | 97613796  | 97614932  | 1137   | 2  | 1.732699  | 0.147731 | 97613553  | 97614040  | 97614467  | 9761539  |
| 103 NA19221 | [2515685 chr2 | 2 | 97678698  | 97701820  | 23123  | 30 | 0.318275  | 0.036938 | 97677320  | 97680077  | 97701458  | 9770218  |
| 104 NA19221 | [2515685 chr2 | 2 | 113797401 | 113798695 | 1295   | 3  | 0.764509  | 0.116808 | 113797105 | 113797698 | 113798352 | 11379903 |
| 105 NA19221 | [2515685 chr2 | 2 | 114028006 | 114028857 | 852    | 7  | 0.575091  | 0.076469 | 114027870 | 114028143 | 114028311 | 11402940 |
| 106 NA19221 | [2515685 chr2 | 2 | 114046138 | 114078067 | 31930  | 62 | 0.39878   | 0.025695 | 114046071 | 114046206 | 114075312 | 11408082 |
| 107 NA19221 | [2515685 chr2 | 2 | 126159437 | 126168349 | 8913   | 3  | -3.383727 | 0.165628 | 126158494 | 126160381 | 126168048 | 12616865 |
| 108 NA19221 | [2515685 chr2 | 2 | 129229413 | 129230774 | 1362   | 2  | -1.507854 | 0.143794 | 129229234 | 129229593 | 129230356 | 12923119 |
| 109 NA19221 | [2515685 chr2 | 2 | 130348901 | 130354377 | 5477   | 9  | -0.45534  | 0.06763  | 130348725 | 130349078 | 130354072 | 13035468 |
| 110 NA19221 | [2515685 chr2 | 2 | 130420955 | 130425589 | 4635   | 3  | -1.021247 | 0.11681  | 130420630 | 130421281 | 130423487 | 13042769 |
| 111 NA19221 | [2515685 chr2 | 2 | 130502777 | 130510591 | 7815   | 9  | -0.442808 | 0.067963 | 130502508 | 130503047 | 130510512 | 13051067 |
| 112 NA19221 | [2515685 chr2 | 2 | 130525542 | 130530964 | 5423   | 6  | 0.434109  | 0.082596 | 130525010 | 130526075 | 130528769 | 13053316 |
| 113 NA19221 | [2515685 chr2 | 2 | 130757537 | 130759877 | 2341   | 5  | 0.500032  | 0.09048  | 130757071 | 130758004 | 130759469 | 13076028 |

|             |               |   |           |           |        |     |           |          |           |           |           |          |
|-------------|---------------|---|-----------|-----------|--------|-----|-----------|----------|-----------|-----------|-----------|----------|
| 114 NA19221 | [2515685 chr2 | 2 | 130916731 | 130921410 | 4680   | 7   | 0.38766   | 0.076469 | 130916351 | 130917112 | 130918946 | 13092387 |
| 115 NA19221 | [2515685 chr2 | 2 | 131415651 | 131417381 | 1731   | 3   | 0.616231  | 0.116809 | 131415479 | 131415824 | 131417181 | 13141758 |
| 116 NA19221 | [2515685 chr2 | 2 | 131980965 | 131984033 | 3069   | 5   | 0.564172  | 0.09048  | 131980708 | 131981222 | 131983828 | 13198423 |
| 117 NA19221 | [2515685 chr2 | 2 | 132092076 | 132136830 | 44755  | 50  | 0.286231  | 0.028613 | 132091710 | 132092442 | 132136199 | 13213746 |
| 118 NA19221 | [2515685 chr2 | 2 | 132418349 | 132433170 | 14822  | 21  | 0.261432  | 0.04415  | 132417867 | 132418832 | 132431929 | 13243441 |
| 119 NA19221 | [2515685 chr2 | 2 | 132843959 | 132881178 | 37220  | 35  | 0.465443  | 0.034198 | 132843722 | 132844196 | 132880751 | 13288160 |
| 120 NA19221 | [2515685 chr2 | 2 | 133114116 | 133142381 | 28266  | 22  | 0.526382  | 0.043135 | 133113550 | 133114682 | 133142082 | 13314268 |
| 121 NA19221 | [2515685 chr2 | 2 | 146694140 | 146710744 | 16605  | 17  | 0.787976  | 0.050678 | 146688620 | 146697098 | 146710557 | 14671093 |
| 122 NA19221 | [2515685 chr2 | 2 | 152258845 | 152288911 | 30067  | 28  | -0.481903 | 0.038234 | 152195576 | 152261803 | 152288671 | 15228915 |
| 123 NA19221 | [2515685 chr2 | 2 | 153622711 | 153625256 | 2546   | 3   | 0.932886  | 0.116809 | 153621175 | 153624247 | 153625088 | 15362542 |
| 124 NA19221 | [2515685 chr2 | 2 | 203121095 | 203138582 | 17488  | 19  | -1.117233 | 0.047983 | 203120801 | 203121389 | 203138142 | 20313902 |
| 125 NA19221 | [2515685 chr2 | 2 | 208176479 | 208184457 | 7979   | 7   | 0.907787  | 0.076469 | 208176093 | 208176865 | 208183930 | 20818498 |
| 126 NA19221 | [2515685 chr2 | 2 | 228717927 | 228730812 | 12886  | 3   | -0.908463 | 0.116809 | 228715615 | 228720239 | 228730139 | 22873148 |
| 127 NA19221 | [2515685 chr2 | 2 | 242167097 | 242168694 | 1598   | 2   | 0.844096  | 0.143061 | 242166791 | 242167403 | 242168459 | 24216892 |
| 128 NA19221 | [2515685 chr2 | 2 | 242456177 | 242507534 | 51358  | 59  | 0.370174  | 0.02634  | 242455959 | 242456396 | 242507284 | 24250778 |
| 129 NA19221 | [2515685 chr2 | 2 | 242664580 | 242668683 | 4104   | 10  | 0.566872  | 0.063979 | 242664284 | 242664877 | 242668532 | 24266883 |
| 130 NA19221 | [2515685 chr3 | 3 | 1007642   | 1024488   | 16847  | 12  | -1.044898 | 0.058456 | 1006948   | 1008336   | 1020832   | 104268!  |
| 131 NA19221 | [2515685 chr3 | 3 | 1317772   | 1344699   | 26928  | 28  | -0.277876 | 0.038486 | 1317099   | 1318446   | 1344365   | 134503!  |
| 132 NA19221 | [2515685 chr3 | 3 | 1757211   | 1765714   | 8504   | 2   | 0.958783  | 0.14306  | 1756096   | 1758327   | 1762058   | 179730!  |
| 133 NA19221 | [2515685 chr3 | 3 | 46398894  | 46415390  | 16497  | 16  | 0.322713  | 0.05058  | 46398134  | 46399655  | 46415063  | 4641571! |
| 134 NA19221 | [2515685 chr3 | 3 | 46682422  | 46711486  | 29065  | 44  | 0.255418  | 0.030501 | 46682173  | 46682671  | 46711250  | 4671172! |
| 135 NA19221 | [2515685 chr3 | 3 | 46770617  | 46826525  | 55909  | 14  | -0.708285 | 0.054538 | 46770172  | 46771063  | 46826330  | 4682672! |
| 136 NA19221 | [2515685 chr3 | 3 | 47797742  | 47799322  | 1581   | 5   | 0.482558  | 0.09048  | 47797610  | 47797874  | 47799000  | 4779964! |
| 137 NA19221 | [2515685 chr3 | 3 | 76861449  | 76863483  | 2035   | 9   | 0.379289  | 0.067439 | 76860987  | 76861912  | 76862761  | 7686420! |
| 138 NA19221 | [2515685 chr3 | 3 | 105577054 | 105578323 | 1270   | 2   | -0.72189  | 0.143489 | 105576616 | 105577493 | 10557921  | 10557872 |
| 139 NA19221 | [2515685 chr3 | 3 | 116139491 | 116150630 | 11140  | 12  | -1.124747 | 0.058951 | 116137943 | 116141040 | 116146974 | 11615548 |
| 140 NA19221 | [2515685 chr3 | 3 | 127155656 | 127158873 | 3218   | 5   | -0.54075  | 0.09048  | 127155390 | 127155923 | 127158237 | 12715950 |
| 141 NA19221 | [2515685 chr3 | 3 | 129686489 | 129701459 | 14971  | 20  | 0.27366   | 0.04524  | 129686035 | 129686943 | 129701103 | 12970181 |
| 142 NA19221 | [2515685 chr3 | 3 | 129809792 | 129820879 | 11088  | 14  | 0.310841  | 0.054072 | 129809255 | 129810330 | 129820228 | 12982153 |
| 143 NA19221 | [2515685 chr3 | 3 | 139091272 | 139127292 | 36021  | 24  | -0.275042 | 0.042233 | 139090977 | 139091568 | 139126951 | 13912763 |
| 144 NA19221 | [2515685 chr3 | 3 | 163994592 | 164108502 | 113911 | 109 | 0.436244  | 0.048001 | 163993392 | 163995793 | 164108018 | 16410898 |
| 145 NA19221 | [2515685 chr3 | 3 | 169035760 | 169039790 | 4031   | 3   | -0.684366 | 0.120634 | 169035430 | 169036090 | 169039290 | 16904029 |
| 146 NA19221 | [2515685 chr3 | 3 | 169045949 | 169048530 | 2582   | 2   | -0.766565 | 0.143061 | 169045091 | 169046808 | 169047495 | 16904956 |
| 147 NA19221 | [2515685 chr3 | 3 | 177466478 | 177474762 | 8285   | 5   | -0.498023 | 0.09048  | 177459600 | 177470134 | 177474415 | 17747511 |
| 148 NA19221 | [2515685 chr3 | 3 | 178862991 | 178872364 | 9374   | 2   | -0.742104 | 0.143061 | 178859732 | 178866251 | 178871958 | 17887277 |
| 149 NA19221 | [2515685 chr3 | 3 | 190846156 | 190852181 | 6026   | 4   | -1.012804 | 0.101161 | 190845504 | 190846809 | 190850598 | 19085376 |
| 150 NA19221 | [2515685 chr3 | 3 | 191219813 | 191223326 | 3514   | 4   | 0.858792  | 0.101159 | 191219291 | 191220336 | 191229218 | 19122373 |
| 151 NA19221 | [2515685 chr3 | 3 | 192477903 | 192492729 | 14827  | 13  | -0.323837 | 0.058507 | 192477476 | 192478331 | 192491309 | 19249414 |
| 152 NA19221 | [2515685 chr3 | 3 | 192547312 | 192554331 | 7020   | 10  | 0.96475   | 0.063969 | 192546950 | 192547674 | 192554127 | 19255453 |
| 153 NA19221 | [2515685 chr3 | 3 | 194357854 | 194368035 | 10182  | 12  | 2.670605  | 0.08735  | 194357665 | 194358044 | 194367817 | 19436825 |
| 154 NA19221 | [2515685 chr3 | 3 | 194883325 | 194885627 | 2303   | 2   | -0.739197 | 0.143061 | 194881986 | 194884665 | 194885401 | 19488585 |
| 155 NA19221 | [2515685 chr3 | 3 | 196041653 | 196050096 | 8444   | 9   | -0.82996  | 0.067439 | 196041317 | 196041990 | 196049206 | 19605098 |
| 156 NA19221 | [2515685 chr3 | 3 | 196692261 | 196713768 | 21508  | 27  | -0.381553 | 0.038936 | 196692122 | 196692400 | 196711768 | 19671576 |
| 157 NA19221 | [2515685 chr3 | 3 | 196879796 | 196897357 | 17562  | 27  | -0.279106 | 0.038936 | 196879715 | 196879878 | 196897150 | 19689756 |
| 158 NA19221 | [2515685 chr3 | 3 | 196901406 | 196938361 | 36956  | 33  | -0.497276 | 0.03522  | 196900665 | 196902147 | 196937706 | 19693901 |
| 159 NA19221 | [2515685 chr3 | 3 | 196965074 | 196966359 | 1286   | 2   | -0.758126 | 0.143061 | 196964655 | 196965494 | 196966111 | 19696660 |
| 160 NA19221 | [2515685 chr3 | 3 | 196991681 | 197002965 | 11285  | 19  | 0.717098  | 0.046415 | 196991423 | 196991939 | 197002044 | 19700388 |
| 161 NA19221 | [2515685 chr3 | 3 | 198422794 | 198427408 | 4615   | 2   | 0.950748  | 0.143061 | 198422381 | 198423207 | 198423959 | 19843085 |
| 162 NA19221 | [2515685 chr3 | 3 | 198589057 | 198591708 | 2652   | 3   | 0.664223  | 0.116809 | 198587852 | 198590262 | 198591156 | 19859226 |
| 163 NA19221 | [2515685 chr3 | 3 | 198651295 | 198653980 | 2686   | 13  | -0.281347 | 0.056113 | 198651255 | 198651335 | 198653743 | 19865421 |
| 164 NA19221 | [2515685 chr3 | 3 | 199218619 | 199221999 | 3381   | 12  | 0.473714  | 0.058405 | 199218354 | 199218884 | 199220440 | 19922355 |
| 165 NA19221 | [2515685 chr4 | 4 | 33716     | 39037     | 5322   | 6   | -0.430059 | 0.082596 | 33384     | 34048     | 36636     | 41439    |
| 166 NA19221 | [2515685 chr4 | 4 | 686885    | 691421    | 4537   | 4   | 0.663292  | 0.10116  | 686527    | 687244    | 690888    | 691955   |
| 167 NA19221 | [2515685 chr4 | 4 | 3475077   | 3504800   | 29724  | 30  | 0.348545  | 0.036938 | 3474503   | 3475651   | 3504307   | 350529!  |
| 168 NA19221 | [2515685 chr4 | 4 | 3504800   | 3511640   | 6841   | 9   | 0.888477  | 0.06744  | 3504307   | 3505294   | 3511385   | 351189!  |

|             |               |   |           |           |        |     |           |          |           |           |           |          |
|-------------|---------------|---|-----------|-----------|--------|-----|-----------|----------|-----------|-----------|-----------|----------|
| 169 NA19221 | [2515685 chr4 | 4 | 3516700   | 3602811   | 86112  | 114 | 0.266132  | 0.018957 | 3516459   | 3516942   | 3602767   | 3602856  |
| 170 NA19221 | [2515685 chr4 | 4 | 8739800   | 8756339   | 16540  | 25  | 0.610355  | 0.040464 | 8739551   | 8740049   | 8755866   | 8756813  |
| 171 NA19221 | [2515685 chr4 | 4 | 8998167   | 9046719   | 48553  | 87  | 1.02384   | 0.021691 | 8850774   | 9001243   | 9046129   | 9047305  |
| 172 NA19221 | [2515685 chr4 | 4 | 9812346   | 9813108   | 763    | 33  | 2.089463  | 0.03522  | 9812284   | 9812408   | 9812952   | 9813265  |
| 173 NA19221 | [2515685 chr4 | 4 | 9887220   | 9911397   | 24178  | 30  | 3.199166  | 0.056348 | 9886886   | 9887555   | 9910388   | 9912407  |
| 174 NA19221 | [2515685 chr4 | 4 | 21045633  | 21053532  | 7900   | 8   | -0.996019 | 0.073367 | 21045231  | 21046035  | 21053115  | 21053956 |
| 175 NA19221 | [2515685 chr4 | 4 | 22339305  | 22343194  | 3890   | 5   | -1.051854 | 0.093348 | 22338950  | 22339660  | 22342440  | 22343945 |
| 176 NA19221 | [2515685 chr4 | 4 | 34174420  | 34175437  | 1018   | 2   | -0.881141 | 0.143061 | 34174211  | 34174630  | 34175229  | 34175644 |
| 177 NA19221 | [2515685 chr4 | 4 | 34602797  | 34650994  | 48198  | 44  | 0.76898   | 0.030892 | 34601994  | 34603600  | 34649535  | 34652454 |
| 178 NA19221 | [2515685 chr4 | 4 | 34683463  | 34721205  | 37743  | 37  | -0.28962  | 0.033376 | 34683217  | 34683710  | 34720219  | 34722194 |
| 179 NA19221 | [2515685 chr4 | 4 | 44846553  | 44852241  | 5689   | 7   | -0.459696 | 0.077071 | 44846404  | 44846702  | 44851938  | 44852544 |
| 180 NA19221 | [2515685 chr4 | 4 | 49057020  | 49075131  | 18112  | 10  | 0.3974    | 0.063979 | 49056876  | 49057164  | 49074344  | 49075915 |
| 181 NA19221 | [2515685 chr4 | 4 | 57975770  | 57979866  | 4097   | 5   | -0.532858 | 0.09048  | 57975552  | 57975989  | 57979557  | 57980175 |
| 182 NA19221 | [2515685 chr4 | 4 | 64536286  | 64549293  | 13008  | 7   | -0.396116 | 0.076469 | 64536001  | 64536571  | 64546627  | 64551955 |
| 183 NA19221 | [2515685 chr4 | 4 | 69202095  | 69319814  | 117720 | 69  | 1.864556  | 0.030621 | 69201955  | 69202236  | 69319569  | 69320055 |
| 184 NA19221 | [2515685 chr4 | 4 | 69319814  | 69364278  | 44465  | 42  | 0.487783  | 0.031218 | 69319569  | 69320059  | 69363702  | 69364855 |
| 185 NA19221 | [2515685 chr4 | 4 | 69670323  | 69720498  | 50176  | 56  | 0.446766  | 0.027163 | 69670283  | 69670364  | 69717422  | 69734215 |
| 186 NA19221 | [2515685 chr4 | 4 | 92289320  | 92292975  | 3656   | 2   | 0.829187  | 0.143061 | 92199954  | 92292396  | 92292781  | 92293171 |
| 187 NA19221 | [2515685 chr4 | 4 | 92324338  | 92366156  | 41819  | 45  | -0.256009 | 0.030547 | 92323778  | 92324899  | 92365952  | 92366361 |
| 188 NA19221 | [2515685 chr4 | 4 | 104554759 | 104606587 | 51829  | 51  | -0.88901  | 0.028648 | 104548793 | 104557835 | 104606362 | 10460681 |
| 189 NA19221 | [2515685 chr4 | 4 | 115865203 | 115869491 | 4289   | 3   | -1.082737 | 0.11681  | 115864913 | 115865494 | 115866415 | 11587556 |
| 190 NA19221 | [2515685 chr4 | 4 | 119592572 | 119600980 | 8409   | 10  | -0.350509 | 0.063979 | 119592179 | 119592966 | 119600423 | 11960153 |
| 191 NA19221 | [2515685 chr4 | 4 | 122639779 | 122647776 | 7998   | 6   | -1.003963 | 0.082597 | 122639003 | 122640555 | 122647404 | 12264814 |
| 192 NA19221 | [2515685 chr4 | 4 | 122651709 | 122654116 | 2408   | 2   | -0.766416 | 0.152894 | 122651102 | 122652317 | 122653038 | 12265519 |
| 193 NA19221 | [2515685 chr4 | 4 | 131541096 | 131555222 | 14127  | 2   | -0.749362 | 0.143061 | 131539254 | 131542939 | 131552146 | 13162968 |
| 194 NA19221 | [2515685 chr4 | 4 | 132479128 | 132481065 | 1938   | 32  | -0.39895  | 0.035765 | 132478081 | 132480175 | 132480937 | 13248119 |
| 195 NA19221 | [2515685 chr4 | 4 | 133000684 | 133043320 | 42637  | 23  | 0.608417  | 0.042187 | 132999479 | 133001890 | 133042031 | 13304460 |
| 196 NA19221 | [2515685 chr4 | 4 | 133099557 | 133101443 | 1887   | 3   | -0.643634 | 0.116809 | 133099343 | 133099772 | 133101236 | 13310165 |
| 197 NA19221 | [2515685 chr4 | 4 | 138537751 | 138549906 | 12156  | 13  | 0.786162  | 0.060907 | 138537443 | 138538059 | 138547414 | 13855239 |
| 198 NA19221 | [2515685 chr4 | 4 | 142588136 | 142590500 | 2365   | 4   | -0.877217 | 0.101116 | 142587774 | 142588498 | 142590303 | 14259069 |
| 199 NA19221 | [2515685 chr4 | 4 | 145143672 | 145362574 | 218903 | 216 | -0.420306 | 0.013869 | 145143319 | 145144025 | 145362148 | 14536300 |
| 200 NA19221 | [2515685 chr4 | 4 | 162237272 | 162242562 | 5291   | 8   | 0.89223   | 0.071531 | 162236487 | 162238058 | 162242381 | 16224274 |
| 201 NA19221 | [2515685 chr4 | 4 | 162806038 | 162809269 | 3232   | 3   | 0.950884  | 0.116809 | 162804872 | 162807204 | 162808734 | 16280980 |
| 202 NA19221 | [2515685 chr4 | 4 | 169183401 | 169368370 | 184970 | 161 | 0.767139  | 0.016152 | 169182712 | 169184090 | 169366713 | 16937002 |
| 203 NA19221 | [2515685 chr4 | 4 | 173363594 | 173367718 | 4125   | 6   | -1.076848 | 0.082596 | 173362583 | 173364606 | 173367283 | 17336815 |
| 204 NA19221 | [2515685 chr4 | 4 | 184101855 | 184125019 | 23165  | 15  | 0.266119  | 0.052239 | 184101506 | 184102205 | 184124432 | 18412560 |
| 205 NA19221 | [2515685 chr4 | 4 | 185532106 | 185544849 | 12744  | 13  | 0.876853  | 0.056113 | 185531516 | 185532696 | 185543276 | 18554642 |
| 206 NA19221 | [2515685 chr4 | 4 | 186816666 | 186819359 | 2694   | 4   | 4.935171  | 0.215197 | 186816420 | 186816912 | 186819049 | 18681967 |
| 207 NA19221 | [2515685 chr4 | 4 | 187728494 | 187732907 | 4414   | 15  | 2.84645   | 0.064083 | 187728193 | 187728795 | 187732541 | 18773327 |
| 208 NA19221 | [2515685 chr4 | 4 | 190528602 | 190533163 | 4562   | 21  | -0.877224 | 0.04415  | 190528058 | 190529146 | 190531664 | 19053466 |
| 209 NA19221 | [2515685 chr4 | 4 | 191142404 | 191143596 | 1193   | 3   | 0.607359  | 0.116809 | 191142135 | 191142673 | 191143215 | 19114397 |
| 210 NA19221 | [2515685 chr5 | 5 | 261631    | 267968    | 6338   | 23  | 0.678664  | 0.042186 | 261032    | 262230    | 267662    | 268274   |
| 211 NA19221 | [2515685 chr5 | 5 | 520743    | 521684    | 942    | 5   | 0.843542  | 0.09048  | 520428    | 521059    | 521427    | 521942   |
| 212 NA19221 | [2515685 chr5 | 5 | 801452    | 872349    | 70898  | 75  | 0.318038  | 0.023362 | 800974    | 801930    | 872083    | 872616   |
| 213 NA19221 | [2515685 chr5 | 5 | 1075284   | 1079920   | 4637   | 24  | 1.253539  | 0.041299 | 1074709   | 1075859   | 1079566   | 1080275  |
| 214 NA19221 | [2515685 chr5 | 5 | 1122995   | 1127700   | 4706   | 40  | 0.736763  | 0.031989 | 1122772   | 1123219   | 1127215   | 1128186  |
| 215 NA19221 | [2515685 chr5 | 5 | 3645611   | 3661195   | 15585  | 18  | 0.283957  | 0.047687 | 3645186   | 3646036   | 3660766   | 3661624  |
| 216 NA19221 | [2515685 chr5 | 5 | 9872544   | 9888338   | 15795  | 20  | -0.25647  | 0.045267 | 9872148   | 9872940   | 9888032   | 9888645  |
| 217 NA19221 | [2515685 chr5 | 5 | 13031439  | 13033620  | 2182   | 2   | -0.735913 | 0.143061 | 13030807  | 13032072  | 13033070  | 13034171 |
| 218 NA19221 | [2515685 chr5 | 5 | 19410747  | 19412172  | 1426   | 3   | 0.762333  | 0.120975 | 19410189  | 19411305  | 19411980  | 19412361 |
| 219 NA19221 | [2515685 chr5 | 5 | 21469206  | 21475944  | 6739   | 9   | -0.385235 | 0.06744  | 21468716  | 21469696  | 21475714  | 21476171 |
| 220 NA19221 | [2515685 chr5 | 5 | 21483394  | 21488147  | 4754   | 4   | -0.993719 | 0.10116  | 21480817  | 21485972  | 21487855  | 21488435 |
| 221 NA19221 | [2515685 chr5 | 5 | 21513408  | 21517092  | 3685   | 7   | -0.420611 | 0.076469 | 21513105  | 21513711  | 21516899  | 21517285 |
| 222 NA19221 | [2515685 chr5 | 5 | 21886827  | 21891927  | 5101   | 7   | -0.399384 | 0.076477 | 21886585  | 21887069  | 21891637  | 21892215 |
| 223 NA19221 | [2515685 chr5 | 5 | 26812489  | 26816432  | 3944   | 5   | -0.528162 | 0.091845 | 26812294  | 26812684  | 26815639  | 26817225 |

|             |               |   |           |           |        |     |           |          |           |           |           |          |
|-------------|---------------|---|-----------|-----------|--------|-----|-----------|----------|-----------|-----------|-----------|----------|
| 224 NA19221 | [2515685 chr5 | 5 | 26831997  | 26837938  | 5942   | 6   | -1.955817 | 0.111372 | 26829858  | 26834136  | 26837469  | 26838401 |
| 225 NA19221 | [2515685 chr5 | 5 | 29107532  | 29108556  | 1025   | 2   | -1.123661 | 0.162043 | 29107170  | 29107894  | 29108184  | 29108921 |
| 226 NA19221 | [2515685 chr5 | 5 | 68865200  | 68886836  | 21637  | 45  | 0.427868  | 0.030447 | 68864770  | 68865630  | 68886492  | 68887181 |
| 227 NA19221 | [2515685 chr5 | 5 | 69347553  | 69432145  | 84593  | 84  | 0.326454  | 0.022116 | 69347241  | 69347865  | 69432145  | 69432141 |
| 228 NA19221 | [2515685 chr5 | 5 | 69844096  | 69847700  | 3605   | 7   | -0.447535 | 0.076469 | 69844026  | 69844167  | 69847577  | 69847821 |
| 229 NA19221 | [2515685 chr5 | 5 | 70222635  | 70307589  | 84955  | 84  | 0.334562  | 0.022075 | 70222323  | 70222947  | 70307589  | 70307591 |
| 230 NA19221 | [2515685 chr5 | 5 | 70403953  | 70431922  | 27970  | 45  | 0.450571  | 0.03016  | 70403337  | 70404569  | 70431095  | 70432741 |
| 231 NA19221 | [2515685 chr5 | 5 | 81459203  | 81466065  | 6863   | 2   | -1.731607 | 0.145677 | 81455614  | 81462405  | 81462863  | 81470281 |
| 232 NA19221 | [2515685 chr5 | 5 | 95345499  | 95346822  | 1324   | 2   | -0.933245 | 0.159518 | 95345196  | 95345802  | 95346458  | 95347181 |
| 233 NA19221 | [2515685 chr5 | 5 | 97427204  | 97428353  | 1150   | 2   | -4.189563 | 0.245689 | 97426913  | 97427496  | 97428177  | 97428521 |
| 234 NA19221 | [2515685 chr5 | 5 | 99410013  | 99412027  | 2015   | 3   | -0.619798 | 0.116809 | 99409789  | 99410237  | 99411772  | 99412281 |
| 235 NA19221 | [2515685 chr5 | 5 | 99414935  | 99419037  | 4103   | 6   | -0.534886 | 0.082596 | 99414604  | 99415267  | 99418328  | 99419741 |
| 236 NA19221 | [2515685 chr5 | 5 | 103531112 | 103532090 | 979    | 2   | -0.719373 | 0.143061 | 103530858 | 103531366 | 103531820 | 10353236 |
| 237 NA19221 | [2515685 chr5 | 5 | 104847353 | 104849319 | 1967   | 4   | -0.629148 | 0.107049 | 104847112 | 104847594 | 104849147 | 10484949 |
| 238 NA19221 | [2515685 chr5 | 5 | 109794290 | 109801944 | 7655   | 5   | -0.588309 | 0.096652 | 109793976 | 109794605 | 109801781 | 10980210 |
| 239 NA19221 | [2515685 chr5 | 5 | 115547704 | 115569695 | 21992  | 19  | -0.301104 | 0.046415 | 115547417 | 115547991 | 115569527 | 11556986 |
| 240 NA19221 | [2515685 chr5 | 5 | 137834442 | 137844134 | 9693   | 9   | 0.714227  | 0.068415 | 137834139 | 137834745 | 137843310 | 13784495 |
| 241 NA19221 | [2515685 chr5 | 5 | 140196516 | 140200983 | 4468   | 7   | -0.968227 | 0.07691  | 140195973 | 140197059 | 140200638 | 14020132 |
| 242 NA19221 | [2515685 chr5 | 5 | 140203081 | 140217091 | 14011  | 18  | 2.92504   | 0.070888 | 140202344 | 140203819 | 140216552 | 14021763 |
| 243 NA19221 | [2515685 chr5 | 5 | 140217091 | 140218928 | 1838   | 2   | 1.274335  | 0.158675 | 140216552 | 140217631 | 140218508 | 14021934 |
| 244 NA19221 | [2515685 chr5 | 5 | 150258078 | 150263668 | 5591   | 8   | -0.362185 | 0.071531 | 150257795 | 150258362 | 150263222 | 15026411 |
| 245 NA19221 | [2515685 chr5 | 5 | 157041613 | 157043994 | 2382   | 3   | 0.62962   | 0.116809 | 157041103 | 157042123 | 157043747 | 15704424 |
| 246 NA19221 | [2515685 chr5 | 5 | 165157996 | 165161604 | 3609   | 2   | -0.852214 | 0.143061 | 165155280 | 165160712 | 165160802 | 16516240 |
| 247 NA19221 | [2515685 chr5 | 5 | 175326990 | 175328798 | 1809   | 3   | 0.605069  | 0.116809 | 175326756 | 175327224 | 175328287 | 17532930 |
| 248 NA19221 | [2515685 chr5 | 5 | 175547133 | 175554481 | 7349   | 10  | 0.429348  | 0.063979 | 175546842 | 175547424 | 175554034 | 17555492 |
| 249 NA19221 | [2515685 chr5 | 5 | 180306298 | 180364542 | 58245  | 61  | 0.659756  | 0.025916 | 180305337 | 180307260 | 180364327 | 18036475 |
| 250 NA19221 | [2515685 chr6 | 6 | 3163      | 18689     | 15527  | 4   | 0.546853  | 0.101159 | 1         | 6325      | 15669     | 21709    |
| 251 NA19221 | [2515685 chr6 | 6 | 201167    | 327656    | 126490 | 130 | 0.375989  | 0.017758 | 200920    | 201415    | 326993    | 328321   |
| 252 NA19221 | [2515685 chr6 | 6 | 26837409  | 26880645  | 43237  | 98  | 0.255145  | 0.020438 | 26837337  | 26837482  | 26880573  | 26880711 |
| 253 NA19221 | [2515685 chr6 | 6 | 29954251  | 30068966  | 114716 | 113 | 0.592563  | 0.019134 | 29950833  | 29957670  | 30068538  | 30069391 |
| 254 NA19221 | [2515685 chr6 | 6 | 30760824  | 30763127  | 2304   | 3   | 0.615984  | 0.116809 | 30760078  | 30761571  | 30762846  | 30763401 |
| 255 NA19221 | [2515685 chr6 | 6 | 31346265  | 31348610  | 2346   | 4   | 0.563877  | 0.101159 | 31345931  | 31346599  | 31348304  | 31348911 |
| 256 NA19221 | [2515685 chr6 | 6 | 31430860  | 31435064  | 4205   | 6   | 0.477161  | 0.082596 | 31430692  | 31431029  | 31433969  | 31436151 |
| 257 NA19221 | [2515685 chr6 | 6 | 31478675  | 31489314  | 10640  | 12  | 0.376558  | 0.058404 | 31478513  | 31478838  | 31488893  | 31489731 |
| 258 NA19221 | [2515685 chr6 | 6 | 31975233  | 31979322  | 4090   | 6   | 0.440416  | 0.082596 | 31974748  | 31975718  | 31978975  | 31979661 |
| 259 NA19221 | [2515685 chr6 | 6 | 32547042  | 32548906  | 1865   | 3   | 0.633899  | 0.116809 | 32546557  | 32547528  | 32548757  | 32549051 |
| 260 NA19221 | [2515685 chr6 | 6 | 32557802  | 32558865  | 1064   | 2   | 1.366095  | 0.143063 | 32557647  | 32557958  | 32558698  | 32559031 |
| 261 NA19221 | [2515685 chr6 | 6 | 32565102  | 32586862  | 21761  | 3   | -2.644075 | 0.231495 | 32564888  | 32565316  | 32586127  | 32587591 |
| 262 NA19221 | [2515685 chr6 | 6 | 32593630  | 32595188  | 1559   | 3   | 0.631171  | 0.116809 | 32593179  | 32594082  | 32594949  | 32595421 |
| 263 NA19221 | [2515685 chr6 | 6 | 32597236  | 32597988  | 753    | 2   | 0.802147  | 0.145722 | 32596981  | 32597492  | 32597844  | 32598131 |
| 264 NA19221 | [2515685 chr6 | 6 | 32605125  | 32605958  | 834    | 2   | -3.509451 | 0.217581 | 32604923  | 32605328  | 32605760  | 32606151 |
| 265 NA19221 | [2515685 chr6 | 6 | 32605958  | 32617052  | 11095  | 7   | -0.455907 | 0.076469 | 32605760  | 32606156  | 32613543  | 32626571 |
| 266 NA19221 | [2515685 chr6 | 6 | 32626799  | 32628234  | 1436   | 2   | -0.738227 | 0.143061 | 32626571  | 32627027  | 32627886  | 32628581 |
| 267 NA19221 | [2515685 chr6 | 6 | 32631127  | 32632349  | 1223   | 2   | -1.357378 | 0.165055 | 32630911  | 32631343  | 32632089  | 32632611 |
| 268 NA19221 | [2515685 chr6 | 6 | 32644822  | 32651918  | 7097   | 5   | 0.785427  | 0.112625 | 32644460  | 32645184  | 32651147  | 32652681 |
| 269 NA19221 | [2515685 chr6 | 6 | 32653862  | 32655482  | 1621   | 2   | 2.035296  | 0.180605 | 32653679  | 32654046  | 32654980  | 32655981 |
| 270 NA19221 | [2515685 chr6 | 6 | 32661503  | 32664861  | 3359   | 2   | 0.849378  | 0.143061 | 32660912  | 32662094  | 32663824  | 32665891 |
| 271 NA19221 | [2515685 chr6 | 6 | 32678696  | 32680751  | 2056   | 3   | 0.627892  | 0.116809 | 32678507  | 32678885  | 32680547  | 32680951 |
| 272 NA19221 | [2515685 chr6 | 6 | 32737263  | 32744343  | 7081   | 11  | 0.899574  | 0.065079 | 32737093  | 32737434  | 32744136  | 32744551 |
| 273 NA19221 | [2515685 chr6 | 6 | 54036900  | 54042384  | 5485   | 5   | 4.135895  | 0.16577  | 54036573  | 54037227  | 54041771  | 54042991 |
| 274 NA19221 | [2515685 chr6 | 6 | 68311037  | 68317946  | 6910   | 2   | -1.204974 | 0.14306  | 68308129  | 68313946  | 68314437  | 68327551 |
| 275 NA19221 | [2515685 chr6 | 6 | 68343526  | 68362786  | 19261  | 12  | -0.417057 | 0.059141 | 68343271  | 68343782  | 68362554  | 68363011 |
| 276 NA19221 | [2515685 chr6 | 6 | 77495034  | 77513520  | 18487  | 12  | 0.788156  | 0.060884 | 77493568  | 77496500  | 77510011  | 77517691 |
| 277 NA19221 | [2515685 chr6 | 6 | 78986700  | 78988530  | 1831   | 4   | -0.586497 | 0.101158 | 78986537  | 78986864  | 78988241  | 78988811 |
| 278 NA19221 | [2515685 chr6 | 6 | 79023318  | 79093263  | 69946  | 70  | 0.772539  | 0.024681 | 79022028  | 79024609  | 79091909  | 79094611 |



|             |               |   |           |           |        |     |           |          |           |           |           |          |
|-------------|---------------|---|-----------|-----------|--------|-----|-----------|----------|-----------|-----------|-----------|----------|
| 279 NA19221 | [2515685 chr6 | 6 | 103844685 | 103871201 | 26517  | 17  | 3.532213  | 0.083122 | 103844347 | 103845023 | 103868241 | 10387416 |
| 280 NA19221 | [2515685 chr6 | 6 | 103885728 | 103891411 | 5684   | 2   | -1.13693  | 0.204366 | 103885514 | 103885942 | 103891179 | 10389164 |
| 281 NA19221 | [2515685 chr6 | 6 | 105367255 | 105377805 | 10551  | 5   | -0.515312 | 0.09048  | 105366523 | 105367988 | 105377509 | 10537810 |
| 282 NA19221 | [2515685 chr6 | 6 | 105748821 | 105751975 | 3155   | 2   | -0.982109 | 0.14466  | 105748494 | 105749149 | 105749600 | 10575435 |
| 283 NA19221 | [2515685 chr6 | 6 | 115422387 | 115424321 | 1935   | 2   | -0.948075 | 0.155693 | 115421781 | 115422994 | 115423780 | 11542486 |
| 284 NA19221 | [2515685 chr6 | 6 | 120671191 | 120671916 | 726    | 2   | 1.573864  | 0.143063 | 120670696 | 120671686 | 120671725 | 12067210 |
| 285 NA19221 | [2515685 chr6 | 6 | 132067697 | 132257375 | 189679 | 11  | -0.422793 | 0.061002 | 132048222 | 132071206 | 132253866 | 13236279 |
| 286 NA19221 | [2515685 chr6 | 6 | 160690579 | 160707020 | 16442  | 8   | 0.388269  | 0.071531 | 160689749 | 160691409 | 160705875 | 16070816 |
| 287 NA19221 | [2515685 chr6 | 6 | 161000832 | 161038819 | 37988  | 64  | 0.327524  | 0.025286 | 161000498 | 161001167 | 161038605 | 16103903 |
| 288 NA19221 | [2515685 chr6 | 6 | 162335978 | 162339853 | 3876   | 5   | -0.462507 | 0.09048  | 162335663 | 162336294 | 162339133 | 16234057 |
| 289 NA19221 | [2515685 chr6 | 6 | 162466674 | 162477003 | 10330  | 8   | -1.076487 | 0.072126 | 162466282 | 162467067 | 162476571 | 16247743 |
| 290 NA19221 | [2515685 chr6 | 6 | 166257138 | 166258475 | 1338   | 2   | -0.723698 | 0.143061 | 166256702 | 166257575 | 166258220 | 16625873 |
| 291 NA19221 | [2515685 chr6 | 6 | 167551513 | 167561964 | 10452  | 13  | 0.314536  | 0.056113 | 167551089 | 167551937 | 167561496 | 16756243 |
| 292 NA19221 | [2515685 chr6 | 6 | 168535543 | 168537360 | 1818   | 12  | 0.566685  | 0.058404 | 168535263 | 168535824 | 168537100 | 16853762 |
| 293 NA19221 | [2515685 chr6 | 6 | 170603879 | 170604666 | 788    | 2   | -0.807905 | 0.14306  | 170603541 | 170604217 | 170604339 | 17060499 |
| 294 NA19221 | [2515685 chr6 | 6 | 170625506 | 170627028 | 1523   | 3   | 1.450049  | 0.11681  | 170625015 | 170625997 | 170626579 | 17062747 |
| 295 NA19221 | [2515685 chr6 | 6 | 170689560 | 170694780 | 5221   | 18  | 0.418793  | 0.047687 | 170689182 | 170689938 | 170694493 | 17069506 |
| 296 NA19221 | [2515685 chr7 | 7 | 1084125   | 1088166   | 4042   | 16  | 0.757762  | 0.050579 | 1083752   | 1084499   | 1087449   | 1088883  |
| 297 NA19221 | [2515685 chr7 | 7 | 1265663   | 1296497   | 30835  | 38  | 0.339016  | 0.03282  | 1265358   | 1265968   | 1296270   | 1296724  |
| 298 NA19221 | [2515685 chr7 | 7 | 3165834   | 3224811   | 58978  | 60  | -0.890221 | 0.026553 | 3165205   | 3166463   | 3224579   | 3225043  |
| 299 NA19221 | [2515685 chr7 | 7 | 3384111   | 3392465   | 8355   | 8   | 0.921792  | 0.071531 | 3383451   | 3384772   | 3390107   | 3395615  |
| 300 NA19221 | [2515685 chr7 | 7 | 5059270   | 5136416   | 77147  | 17  | 0.326342  | 0.04907  | 5031194   | 5061628   | 5134058   | 5191214  |
| 301 NA19221 | [2515685 chr7 | 7 | 5784187   | 5791034   | 6848   | 13  | 0.381748  | 0.056113 | 5783317   | 5785058   | 5790597   | 5791477  |
| 302 NA19221 | [2515685 chr7 | 7 | 6559523   | 6568102   | 8580   | 14  | 0.317864  | 0.054072 | 6559048   | 6559999   | 6567899   | 6568306  |
| 303 NA19221 | [2515685 chr7 | 7 | 14715947  | 14721258  | 5312   | 6   | -0.462111 | 0.082596 | 14715539  | 14716355  | 14720713  | 1472180  |
| 304 NA19221 | [2515685 chr7 | 7 | 38159778  | 38170480  | 10703  | 10  | -0.487255 | 0.063979 | 38159476  | 38160081  | 38170113  | 3817084  |
| 305 NA19221 | [2515685 chr7 | 7 | 43770898  | 43943932  | 173035 | 113 | 0.517364  | 0.019033 | 43768995  | 43772802  | 43941574  | 4402006  |
| 306 NA19221 | [2515685 chr7 | 7 | 56652639  | 56668797  | 16159  | 12  | 0.381237  | 0.058404 | 56652228  | 56653051  | 56668252  | 5666934  |
| 307 NA19221 | [2515685 chr7 | 7 | 57637083  | 57648467  | 11385  | 7   | 0.527559  | 0.076469 | 57634979  | 57639188  | 57647779  | 5764915  |
| 308 NA19221 | [2515685 chr7 | 7 | 57687722  | 57693946  | 6225   | 5   | 0.549072  | 0.09048  | 57687263  | 57688181  | 57693633  | 5769426  |
| 309 NA19221 | [2515685 chr7 | 7 | 62214740  | 62223444  | 8705   | 42  | 0.294654  | 0.031219 | 62206024  | 62217098  | 62223316  | 6222357  |
| 310 NA19221 | [2515685 chr7 | 7 | 62333811  | 62342506  | 8696   | 44  | 0.291564  | 0.030501 | 62333683  | 62333940  | 62340148  | 6235120  |
| 311 NA19221 | [2515685 chr7 | 7 | 62654114  | 62670121  | 16008  | 8   | 0.43083   | 0.071531 | 62653036  | 62655193  | 62667763  | 6267326  |
| 312 NA19221 | [2515685 chr7 | 7 | 63997159  | 64008697  | 11539  | 14  | 0.533343  | 0.054071 | 63996513  | 63997805  | 64008352  | 6400904  |
| 313 NA19221 | [2515685 chr7 | 7 | 64032682  | 64045487  | 12806  | 37  | -0.40014  | 0.033261 | 64032499  | 64032865  | 64045069  | 6404590  |
| 314 NA19221 | [2515685 chr7 | 7 | 64162316  | 64165981  | 3666   | 3   | 0.662318  | 0.127846 | 64160143  | 64164489  | 64165654  | 6416630  |
| 315 NA19221 | [2515685 chr7 | 7 | 64464087  | 64476429  | 12343  | 33  | -0.347255 | 0.035219 | 64463669  | 64464506  | 64476149  | 6447671  |
| 316 NA19221 | [2515685 chr7 | 7 | 64544321  | 64556662  | 12342  | 35  | -0.384341 | 0.034198 | 64544040  | 64544602  | 64556244  | 6455708  |
| 317 NA19221 | [2515685 chr7 | 7 | 64691204  | 64725545  | 34342  | 38  | 0.47364   | 0.033082 | 64690582  | 64691826  | 64725209  | 6472588  |
| 318 NA19221 | [2515685 chr7 | 7 | 66179770  | 66197145  | 17376  | 40  | 0.319524  | 0.031989 | 66179566  | 66179975  | 66196864  | 6619742  |
| 319 NA19221 | [2515685 chr7 | 7 | 69866390  | 69871056  | 4667   | 6   | 2.072238  | 0.09286  | 69865412  | 69867368  | 69870420  | 6987169  |
| 320 NA19221 | [2515685 chr7 | 7 | 71938663  | 71940886  | 2224   | 9   | 0.43599   | 0.06744  | 71938595  | 71938731  | 71940710  | 7194106  |
| 321 NA19221 | [2515685 chr7 | 7 | 72013828  | 72014871  | 1044   | 4   | 0.61163   | 0.10116  | 72013665  | 72013991  | 72014598  | 7201514  |
| 322 NA19221 | [2515685 chr7 | 7 | 72069083  | 72099749  | 30667  | 85  | 0.253135  | 0.021945 | 72068742  | 72069425  | 72099358  | 7210014  |
| 323 NA19221 | [2515685 chr7 | 7 | 73597255  | 73600095  | 2841   | 13  | 0.297526  | 0.056113 | 73597026  | 73597485  | 73599977  | 7360021  |
| 324 NA19221 | [2515685 chr7 | 7 | 73622788  | 73653438  | 30651  | 83  | 0.253706  | 0.022207 | 73622444  | 73623133  | 73653039  | 7365383  |
| 325 NA19221 | [2515685 chr7 | 7 | 73822078  | 73936803  | 114726 | 296 | 0.275131  | 0.01176  | 73821090  | 73823066  | 73936439  | 7393716  |
| 326 NA19221 | [2515685 chr7 | 7 | 74021995  | 74027211  | 5217   | 15  | 0.401497  | 0.052239 | 74021551  | 74022439  | 74027049  | 7402737  |
| 327 NA19221 | [2515685 chr7 | 7 | 74033918  | 74042644  | 8727   | 29  | 0.308596  | 0.03757  | 74033868  | 74033969  | 74042299  | 7404298  |
| 328 NA19221 | [2515685 chr7 | 7 | 74096901  | 74097943  | 1043   | 4   | 0.61163   | 0.10116  | 74096630  | 74097173  | 74097780  | 7409810  |
| 329 NA19221 | [2515685 chr7 | 7 | 74142975  | 74145196  | 2222   | 9   | 0.43599   | 0.06744  | 74142799  | 74143151  | 74145129  | 7414526  |
| 330 NA19221 | [2515685 chr7 | 7 | 74408046  | 74514273  | 106228 | 289 | 0.279654  | 0.011901 | 74160022  | 74410404  | 74513302  | 7451524  |
| 331 NA19221 | [2515685 chr7 | 7 | 74557218  | 74559460  | 2243   | 9   | 0.43599   | 0.06744  | 74557021  | 74557415  | 74559393  | 7455952  |
| 332 NA19221 | [2515685 chr7 | 7 | 74585259  | 74587483  | 2225   | 9   | 0.435989  | 0.06744  | 74585083  | 74585435  | 74587416  | 7458755  |
| 333 NA19221 | [2515685 chr7 | 7 | 74613282  | 74615502  | 2221   | 9   | 0.435989  | 0.06744  | 74613106  | 74613458  | 74615435  | 7461557  |

|             |               |   |           |           |        |     |           |          |           |           |           |          |
|-------------|---------------|---|-----------|-----------|--------|-----|-----------|----------|-----------|-----------|-----------|----------|
| 334 NA19221 | [2515685 chr7 | 7 | 74768471  | 74782434  | 13964  | 31  | 0.315946  | 0.036338 | 74768039  | 74768904  | 74782400  | 74782461 |
| 335 NA19221 | [2515685 chr7 | 7 | 75790452  | 75800166  | 9715   | 13  | -0.318918 | 0.056114 | 75790248  | 75790656  | 75799479  | 75800851 |
| 336 NA19221 | [2515685 chr7 | 7 | 76333258  | 76334018  | 761    | 3   | 0.646533  | 0.116809 | 76333108  | 76333409  | 76333586  | 76334451 |
| 337 NA19221 | [2515685 chr7 | 7 | 76336326  | 76341578  | 5253   | 5   | 0.728246  | 0.09048  | 76336153  | 76336500  | 76339220  | 76346141 |
| 338 NA19221 | [2515685 chr7 | 7 | 76398182  | 76437640  | 39459  | 15  | -0.331104 | 0.052239 | 76397815  | 76398549  | 76436912  | 76438361 |
| 339 NA19221 | [2515685 chr7 | 7 | 89455106  | 89456632  | 1527   | 3   | 3.504107  | 0.150157 | 89454839  | 89455373  | 89456225  | 89457031 |
| 340 NA19221 | [2515685 chr7 | 7 | 99462602  | 99514350  | 51749  | 28  | 0.355183  | 0.038235 | 99444467  | 99464960  | 99514202  | 99514491 |
| 341 NA19221 | [2515685 chr7 | 7 | 101706877 | 101925433 | 218557 | 310 | 0.580632  | 0.011489 | 101690888 | 101709235 | 101924670 | 10192619 |
| 342 NA19221 | [2515685 chr7 | 7 | 101941832 | 101955756 | 13925  | 9   | -0.459168 | 0.06744  | 101941101 | 101942563 | 101953398 | 10197676 |
| 343 NA19221 | [2515685 chr7 | 7 | 109034776 | 109046722 | 11947  | 9   | 3.072037  | 0.099731 | 109024063 | 109037134 | 109046491 | 10904695 |
| 344 NA19221 | [2515685 chr7 | 7 | 109777418 | 109782655 | 5238   | 4   | 0.843312  | 0.101158 | 109776936 | 109777901 | 109782301 | 10978301 |
| 345 NA19221 | [2515685 chr7 | 7 | 125639507 | 125644775 | 5269   | 6   | -0.934695 | 0.088677 | 125639054 | 125639961 | 125644046 | 12564550 |
| 346 NA19221 | [2515685 chr7 | 7 | 126114282 | 126121632 | 7351   | 10  | -0.432305 | 0.063979 | 126114248 | 126114317 | 126121278 | 12612198 |
| 347 NA19221 | [2515685 chr7 | 7 | 133241895 | 133257367 | 15473  | 16  | 2.49881   | 0.074761 | 133240782 | 133243008 | 133255009 | 13326093 |
| 348 NA19221 | [2515685 chr7 | 7 | 141498099 | 141528250 | 30152  | 40  | 0.570965  | 0.032335 | 141497066 | 141499133 | 141527840 | 14152866 |
| 349 NA19221 | [2515685 chr7 | 7 | 141717979 | 141735031 | 17053  | 15  | -0.309398 | 0.052826 | 141717615 | 141718343 | 141734739 | 14173532 |
| 350 NA19221 | [2515685 chr7 | 7 | 141859547 | 141860812 | 1266   | 2   | -0.91228  | 0.143061 | 141859116 | 141859979 | 141860531 | 14186109 |
| 351 NA19221 | [2515685 chr7 | 7 | 142735088 | 142813938 | 78851  | 92  | -0.281734 | 0.006373 | 142734133 | 142736044 | 142813863 | 14281401 |
| 352 NA19221 | [2515685 chr7 | 7 | 142818909 | 142944772 | 125864 | 155 | -0.281734 | 0.006373 | 142818362 | 142819456 | 142944596 | 14294494 |
| 353 NA19221 | [2515685 chr7 | 7 | 142952934 | 142991975 | 39042  | 56  | -0.281734 | 0.006373 | 142952755 | 142953114 | 142991709 | 14299224 |
| 354 NA19221 | [2515685 chr7 | 7 | 142996566 | 143415599 | 419034 | 477 | -0.281734 | 0.006373 | 142996491 | 142996641 | 143415618 | 14341561 |
| 355 NA19221 | [2515685 chr7 | 7 | 143420642 | 143498849 | 78208  | 157 | -0.281734 | 0.006373 | 143420120 | 143421165 | 143498702 | 14349899 |
| 356 NA19221 | [2515685 chr7 | 7 | 143501961 | 143512678 | 10718  | 19  | -0.281734 | 0.006373 | 143501781 | 143502141 | 143512168 | 14351318 |
| 357 NA19221 | [2515685 chr7 | 7 | 149300307 | 149319821 | 19515  | 16  | -0.549603 | 0.051641 | 149299905 | 149300710 | 149319432 | 14932021 |
| 358 NA19221 | [2515685 chr7 | 7 | 152916180 | 152936722 | 20543  | 16  | -0.480733 | 0.051978 | 152915745 | 152916616 | 152935996 | 15293744 |
| 359 NA19221 | [2515685 chr7 | 7 | 152967238 | 152968286 | 1049   | 2   | -0.952961 | 0.143061 | 152966998 | 152967478 | 152968034 | 15296853 |
| 360 NA19221 | [2515685 chr7 | 7 | 157022856 | 157026502 | 3647   | 6   | 0.601711  | 0.082597 | 157022471 | 157023242 | 157026181 | 15702682 |
| 361 NA19221 | [2515685 chr7 | 7 | 158617060 | 158624386 | 7327   | 6   | 0.864847  | 0.08316  | 158616763 | 158617357 | 158622028 | 15862674 |
| 362 NA19221 | [2515685 chr8 | 8 | 262995    | 266152    | 3158   | 6   | 0.417302  | 0.082596 | 262498    | 263492    | 265859    | 266446   |
| 363 NA19221 | [2515685 chr8 | 8 | 2238728   | 2253799   | 15072  | 10  | 0.788786  | 0.06398  | 2233839   | 2241488   | 2251039   | 2257521  |
| 364 NA19221 | [2515685 chr8 | 8 | 3631825   | 3634874   | 3050   | 4   | -0.53612  | 0.10159  | 3631313   | 3632337   | 3634623   | 3635121  |
| 365 NA19221 | [2515685 chr8 | 8 | 4110204   | 4112526   | 2323   | 2   | 5.122508  | 0.294136 | 4109692   | 4110717   | 4112031   | 4113021  |
| 366 NA19221 | [2515685 chr8 | 8 | 4470698   | 4472216   | 1519   | 3   | -0.627241 | 0.116809 | 4470415   | 4470982   | 4471904   | 4472521  |
| 367 NA19221 | [2515685 chr8 | 8 | 5582875   | 5594011   | 11137  | 9   | 0.852025  | 0.06744  | 5582615   | 5583135   | 5592820   | 5595203  |
| 368 NA19221 | [2515685 chr8 | 8 | 6050293   | 6057011   | 6719   | 9   | -1.009864 | 0.06744  | 6049956   | 6050630   | 6056619   | 6057401  |
| 369 NA19221 | [2515685 chr8 | 8 | 6817073   | 6825659   | 8587   | 14  | -0.421368 | 0.022208 | 6816809   | 6817338   | 6825333   | 6825981  |
| 370 NA19221 | [2515685 chr8 | 8 | 6828564   | 6844770   | 16207  | 26  | -0.421368 | 0.022208 | 6828551   | 6828577   | 6844445   | 6845091  |
| 371 NA19221 | [2515685 chr8 | 8 | 6847669   | 6865082   | 17414  | 31  | -0.421368 | 0.022208 | 6847656   | 6847682   | 6864876   | 6865281  |
| 372 NA19221 | [2515685 chr8 | 8 | 7098713   | 7146048   | 47336  | 202 | 0.322907  | 0.014235 | 7098285   | 7099142   | 7145836   | 7146267  |
| 373 NA19221 | [2515685 chr8 | 8 | 7176337   | 7187950   | 11614  | 33  | 0.901232  | 0.035219 | 7176045   | 7176630   | 7187698   | 7188207  |
| 374 NA19221 | [2515685 chr8 | 8 | 7231075   | 7238102   | 7028   | 12  | -0.432376 | 0.058404 | 7230613   | 7231538   | 7237841   | 7238363  |
| 375 NA19221 | [2515685 chr8 | 8 | 7395868   | 7431662   | 35795  | 149 | 0.346181  | 0.016575 | 7395599   | 7396137   | 7431162   | 7432163  |
| 376 NA19221 | [2515685 chr8 | 8 | 7607253   | 7665019   | 57767  | 261 | 0.368951  | 0.012523 | 7606824   | 7607682   | 7664736   | 7665303  |
| 377 NA19221 | [2515685 chr8 | 8 | 7814852   | 7816935   | 2084   | 4   | 0.516071  | 0.101159 | 7814687   | 7815018   | 7816630   | 7817241  |
| 378 NA19221 | [2515685 chr8 | 8 | 7862281   | 7873897   | 11617  | 34  | 0.894551  | 0.034698 | 7862030   | 7862533   | 7873605   | 7874191  |
| 379 NA19221 | [2515685 chr8 | 8 | 7909185   | 7929654   | 20470  | 81  | 0.327237  | 0.02248  | 7908888   | 7909482   | 7929154   | 7930151  |
| 380 NA19221 | [2515685 chr8 | 8 | 12023134  | 12035286  | 12153  | 33  | 0.880721  | 0.03522  | 12022997  | 12023272  | 12034973  | 12035591 |
| 381 NA19221 | [2515685 chr8 | 8 | 12064826  | 12072445  | 7620   | 25  | 0.323236  | 0.040464 | 12064663  | 12064989  | 12072267  | 12072621 |
| 382 NA19221 | [2515685 chr8 | 8 | 12072445  | 12072888  | 444    | 2   | -0.749223 | 0.143061 | 12072267  | 12072623  | 12072625  | 12073151 |
| 383 NA19221 | [2515685 chr8 | 8 | 12275692  | 12285606  | 9915   | 18  | 0.829915  | 0.047687 | 12275477  | 12275908  | 12284752  | 12286461 |
| 384 NA19221 | [2515685 chr8 | 8 | 12314107  | 12321726  | 7620   | 22  | 0.353531  | 0.043135 | 12313944  | 12314270  | 12321548  | 12321901 |
| 385 NA19221 | [2515685 chr8 | 8 | 12321726  | 12322179  | 454    | 2   | -0.749223 | 0.143061 | 12321548  | 12321904  | 12321906  | 12322451 |
| 386 NA19221 | [2515685 chr8 | 8 | 14915681  | 14917547  | 1867   | 2   | -0.878578 | 0.143061 | 14915019  | 14916344  | 14917165  | 14917931 |
| 387 NA19221 | [2515685 chr8 | 8 | 16365283  | 16370515  | 5233   | 7   | -0.94284  | 0.079545 | 16364860  | 16365707  | 16370012  | 16371011 |
| 388 NA19221 | [2515685 chr8 | 8 | 18897696  | 18903110  | 5415   | 6   | -1.107719 | 0.082597 | 18897204  | 18898189  | 18902765  | 18903451 |

|             |               |   |           |           |        |     |           |          |           |           |           |           |
|-------------|---------------|---|-----------|-----------|--------|-----|-----------|----------|-----------|-----------|-----------|-----------|
| 389 NA19221 | [2515685 chr8 | 8 | 21661738  | 21710244  | 48507  | 32  | 0.346775  | 0.035765 | 21660494  | 21662982  | 21709805  | 2171068-  |
| 390 NA19221 | [2515685 chr8 | 8 | 22602693  | 22609330  | 6638   | 8   | 0.454699  | 0.071531 | 22602161  | 22603225  | 22608929  | 2260973   |
| 391 NA19221 | [2515685 chr8 | 8 | 22898972  | 22900547  | 1576   | 2   | 0.757024  | 0.143061 | 22898453  | 22899491  | 22900145  | 2290094-  |
| 392 NA19221 | [2515685 chr8 | 8 | 39351178  | 39506673  | 155496 | 161 | 0.746003  | 0.016219 | 39350826  | 39351530  | 39505284  | 3950806-  |
| 393 NA19221 | [2515685 chr8 | 8 | 39537830  | 39540432  | 2603   | 6   | -0.492224 | 0.085338 | 39537529  | 39538132  | 39540290  | 3954057-  |
| 394 NA19221 | [2515685 chr8 | 8 | 51193670  | 51201152  | 7483   | 11  | -1.057636 | 0.061002 | 51193335  | 51194005  | 51200867  | 5120143-  |
| 395 NA19221 | [2515685 chr8 | 8 | 54001807  | 54002677  | 871    | 2   | -1.290948 | 0.147077 | 54001673  | 54001942  | 54002470  | 5400288-  |
| 396 NA19221 | [2515685 chr8 | 8 | 54044708  | 54057045  | 12338  | 17  | -0.289789 | 0.049743 | 54043738  | 54045679  | 54054285  | 5406042-  |
| 397 NA19221 | [2515685 chr8 | 8 | 58278355  | 58296106  | 17752  | 17  | 1.033381  | 0.049431 | 58277116  | 58279595  | 58295669  | 5829654-  |
| 398 NA19221 | [2515685 chr8 | 8 | 58333138  | 58336368  | 3231   | 5   | 0.477272  | 0.09048  | 58332402  | 58333874  | 58335994  | 5833674-  |
| 399 NA19221 | [2515685 chr8 | 8 | 68708979  | 68716957  | 7979   | 9   | -0.870371 | 0.06744  | 68708618  | 68709340  | 68716127  | 6871778-  |
| 400 NA19221 | [2515685 chr8 | 8 | 86741354  | 86910255  | 168902 | 105 | 0.833137  | 0.019745 | 86740951  | 86741757  | 86910002  | 8691050-  |
| 401 NA19221 | [2515685 chr8 | 8 | 87020698  | 87024346  | 3649   | 4   | -0.593539 | 0.10116  | 87020363  | 87021033  | 87023761  | 8702493-  |
| 402 NA19221 | [2515685 chr8 | 8 | 115148105 | 115149916 | 1812   | 2   | -1.464411 | 0.147339 | 115147694 | 115148517 | 115149348 | 11515048- |
| 403 NA19221 | [2515685 chr8 | 8 | 119315819 | 119318061 | 2243   | 2   | -1.026658 | 0.148129 | 119315263 | 119316376 | 119317000 | 11931912- |
| 404 NA19221 | [2515685 chr8 | 8 | 120222654 | 120229952 | 7299   | 6   | 0.69617   | 0.082597 | 120218251 | 120225414 | 120229434 | 12023047- |
| 405 NA19221 | [2515685 chr8 | 8 | 130802565 | 130824865 | 22301  | 5   | -0.480555 | 0.091341 | 130780241 | 130805325 | 130823894 | 13082583- |
| 406 NA19221 | [2515685 chr8 | 8 | 145262133 | 145290325 | 28193  | 27  | 0.438796  | 0.038936 | 145260806 | 145263460 | 145290013 | 14529063- |
| 407 NA19221 | [2515685 chr8 | 8 | 145365088 | 145555393 | 190306 | 114 | 0.345884  | 0.018984 | 145364657 | 145365519 | 145555030 | 14555575- |
| 408 NA19221 | [2515685 chr8 | 8 | 146248406 | 146249360 | 955    | 3   | 0.661053  | 0.116809 | 146248197 | 146248616 | 146249251 | 14624946- |
| 409 NA19221 | [2515685 chr9 | 9 | 1022      | 36293     | 35272  | 60  | 0.398569  | 0.026119 | 1         | 2044      | 35316     | 3727C     |
| 410 NA19221 | [2515685 chr9 | 9 | 7325151   | 7327905   | 2755   | 4   | -0.565829 | 0.10116  | 7324684   | 7325619   | 7327689   | 732812-   |
| 411 NA19221 | [2515685 chr9 | 9 | 11859786  | 12175318  | 315533 | 296 | -1.0218   | 0.012026 | 11859288  | 11860284  | 12175002  | 1217563-  |
| 412 NA19221 | [2515685 chr9 | 9 | 33688323  | 33689560  | 1238   | 2   | -0.815649 | 0.143061 | 33687588  | 33689059  | 33689374  | 3368974-  |
| 413 NA19221 | [2515685 chr9 | 9 | 38534534  | 38554814  | 20281  | 10  | 0.533543  | 0.063978 | 38534046  | 38535023  | 38552448  | 3855747-  |
| 414 NA19221 | [2515685 chr9 | 9 | 38888680  | 38915114  | 26435  | 59  | 0.303275  | 0.02634  | 38888535  | 38888826  | 38914869  | 3891535-  |
| 415 NA19221 | [2515685 chr9 | 9 | 39140946  | 39196054  | 55109  | 96  | -0.256363 | 0.013609 | 39140917  | 39140975  | 39195530  | 3919657-  |
| 416 NA19221 | [2515685 chr9 | 9 | 39202675  | 39258993  | 56319  | 109 | -0.256363 | 0.013609 | 39202432  | 39202918  | 39258547  | 3925944-  |
| 417 NA19221 | [2515685 chr9 | 9 | 39489226  | 39507377  | 18152  | 35  | -0.263656 | 0.016251 | 39489107  | 39489345  | 39506871  | 3950788-  |
| 418 NA19221 | [2515685 chr9 | 9 | 39512437  | 39570292  | 57856  | 109 | -0.263656 | 0.016251 | 39512136  | 39512739  | 39569846  | 3957073-  |
| 419 NA19221 | [2515685 chr9 | 9 | 40146093  | 40281549  | 135457 | 139 | -0.292953 | 0.011544 | 40145849  | 40146338  | 40281292  | 4028180-  |
| 420 NA19221 | [2515685 chr9 | 9 | 40285326  | 40357927  | 72602  | 154 | -0.292953 | 0.011544 | 40285124  | 40285529  | 40357722  | 4035813-  |
| 421 NA19221 | [2515685 chr9 | 9 | 41185977  | 41210753  | 24777  | 47  | 0.33249   | 0.029511 | 41185096  | 41186858  | 41210608  | 4121089-  |
| 422 NA19221 | [2515685 chr9 | 9 | 42072254  | 42079321  | 7068   | 13  | 0.291721  | 0.056113 | 42072074  | 42072435  | 42078891  | 4207975-  |
| 423 NA19221 | [2515685 chr9 | 9 | 42926440  | 42931587  | 5148   | 11  | -0.384302 | 0.061002 | 42926203  | 42926677  | 42931360  | 4293181-  |
| 424 NA19221 | [2515685 chr9 | 9 | 42937394  | 42938421  | 1028   | 4   | -0.668566 | 0.101161 | 42937203  | 42937585  | 42937973  | 4293887-  |
| 425 NA19221 | [2515685 chr9 | 9 | 43055987  | 43062104  | 6118   | 8   | -0.475446 | 0.071531 | 43055441  | 43056534  | 43061943  | 4306226-  |
| 426 NA19221 | [2515685 chr9 | 9 | 43065211  | 43066832  | 1622   | 2   | -1.152412 | 0.155553 | 43064261  | 43066162  | 43066646  | 4306701-  |
| 427 NA19221 | [2515685 chr9 | 9 | 43097020  | 43170873  | 73854  | 162 | -0.258793 | 0.011671 | 43096964  | 43097077  | 43170670  | 4317107-  |
| 428 NA19221 | [2515685 chr9 | 9 | 43174658  | 43292990  | 118333 | 126 | -0.258793 | 0.011671 | 43174402  | 43174915  | 43290624  | 4329677-  |
| 429 NA19221 | [2515685 chr9 | 9 | 43331773  | 43361150  | 29378  | 41  | -0.279297 | 0.031597 | 43331647  | 43331899  | 43361022  | 4336127-  |
| 430 NA19221 | [2515685 chr9 | 9 | 43577337  | 43615335  | 37999  | 51  | -0.256301 | 0.02833  | 43574339  | 43579703  | 43614408  | 4361626-  |
| 431 NA19221 | [2515685 chr9 | 9 | 43937179  | 43943985  | 6807   | 19  | 0.461962  | 0.046415 | 43936836  | 43937522  | 43943754  | 4394421-  |
| 432 NA19221 | [2515685 chr9 | 9 | 44148276  | 44149697  | 1422   | 3   | 0.641109  | 0.116809 | 44148167  | 44148386  | 44148930  | 4415046-  |
| 433 NA19221 | [2515685 chr9 | 9 | 44185625  | 44208815  | 23191  | 37  | 0.318973  | 0.033261 | 44185383  | 44185867  | 44206449  | 4422263-  |
| 434 NA19221 | [2515685 chr9 | 9 | 44379093  | 44382142  | 3050   | 2   | 0.873133  | 0.143061 | 44373952  | 44381459  | 44381801  | 4438248-  |
| 435 NA19221 | [2515685 chr9 | 9 | 44450516  | 44497009  | 46494  | 36  | -0.323544 | 0.03372  | 44450229  | 44450804  | 44496570  | 4449744-  |
| 436 NA19221 | [2515685 chr9 | 9 | 44664337  | 44686326  | 21990  | 47  | 0.36994   | 0.029511 | 44650514  | 44666703  | 44686084  | 4468656-  |
| 437 NA19221 | [2515685 chr9 | 9 | 44923445  | 44945467  | 22023  | 42  | 0.375993  | 0.031219 | 44923203  | 44923687  | 44943101  | 4495928-  |
| 438 NA19221 | [2515685 chr9 | 9 | 45400622  | 45403672  | 3051   | 2   | 0.873133  | 0.143061 | 45400280  | 45400964  | 45401306  | 4540817-  |
| 439 NA19221 | [2515685 chr9 | 9 | 64290263  | 64296264  | 6002   | 9   | -0.427796 | 0.06744  | 64289944  | 64290583  | 64293898  | 6434611-  |
| 440 NA19221 | [2515685 chr9 | 9 | 65972346  | 66023205  | 50860  | 102 | 0.297914  | 0.020033 | 65971766  | 65972927  | 66023060  | 6602335-  |
| 441 NA19221 | [2515685 chr9 | 9 | 66262785  | 66285968  | 23184  | 37  | 0.325314  | 0.033261 | 66262543  | 66263027  | 66283602  | 6629979-  |
| 442 NA19221 | [2515685 chr9 | 9 | 66396678  | 66396962  | 285    | 2   | -0.818741 | 0.143061 | 66396537  | 66396819  | 66396821  | 6639710-  |
| 443 NA19221 | [2515685 chr9 | 9 | 66565885  | 66585846  | 19962  | 30  | -0.341724 | 0.036938 | 66565653  | 66566117  | 66585651  | 6658604-  |

|             |                |    |           |           |        |     |           |          |           |           |           |           |
|-------------|----------------|----|-----------|-----------|--------|-----|-----------|----------|-----------|-----------|-----------|-----------|
| 444 NA19221 | [2515685 chr9  | 9  | 67870462  | 67881932  | 11471  | 23  | -0.252166 | 0.042186 | 67869806  | 67871119  | 67881894  | 67881971  |
| 445 NA19221 | [2515685 chr9  | 9  | 67939767  | 67968498  | 28732  | 42  | -0.299302 | 0.031218 | 67939545  | 67939990  | 67968408  | 6796858!  |
| 446 NA19221 | [2515685 chr9  | 9  | 68116442  | 68145019  | 28578  | 48  | -0.265729 | 0.029202 | 68116320  | 68116564  | 68144983  | 6814505!  |
| 447 NA19221 | [2515685 chr9  | 9  | 76777070  | 76779384  | 2315   | 2   | 1.087373  | 0.144247 | 76776756  | 76777385  | 76778920  | 7677984!  |
| 448 NA19221 | [2515685 chr9  | 9  | 87322023  | 87331476  | 9454   | 10  | -0.349769 | 0.066781 | 87321647  | 87322400  | 87331188  | 8733176!  |
| 449 NA19221 | [2515685 chr9  | 9  | 126059422 | 126066145 | 6724   | 9   | 0.477559  | 0.06744  | 126059121 | 126059724 | 126065919 | 12606637! |
| 450 NA19221 | [2515685 chr9  | 9  | 126599475 | 126601911 | 2437   | 3   | 0.681559  | 0.116809 | 126598552 | 126600399 | 126600685 | 12660313! |
| 451 NA19221 | [2515685 chr9  | 9  | 133596479 | 133608339 | 11861  | 16  | 0.379732  | 0.05058  | 133596185 | 133596774 | 133607852 | 13360882! |
| 452 NA19221 | [2515685 chr9  | 9  | 136676382 | 136930244 | 253863 | 247 | 0.266284  | 0.012873 | 136675721 | 136677043 | 136929944 | 13693054! |
| 453 NA19221 | [2515685 chr9  | 9  | 137015950 | 137032058 | 16109  | 19  | 0.354163  | 0.046415 | 137015695 | 137016206 | 137031309 | 13703280! |
| 454 NA19221 | [2515685 chr9  | 9  | 137473657 | 137490918 | 17262  | 22  | 0.375559  | 0.043135 | 137473537 | 137473778 | 137490636 | 13749120! |
| 455 NA19221 | [2515685 chr9  | 9  | 137620832 | 137622712 | 1881   | 5   | 0.608865  | 0.09048  | 137620242 | 137621422 | 137622576 | 13762284! |
| 456 NA19221 | [2515685 chr10 | 10 | 83788     | 123866    | 40079  | 34  | 0.280334  | 0.03477  | 83225     | 84352     | 123437    | 124295!   |
| 457 NA19221 | [2515685 chr10 | 10 | 6693908   | 6704321   | 10414  | 9   | 0.805386  | 0.068198 | 6692231   | 6695585   | 6704008   | 670463!   |
| 458 NA19221 | [2515685 chr10 | 10 | 20036833  | 20038315  | 1483   | 2   | -0.902454 | 0.14306  | 20036464  | 20037202  | 20038007  | 2003862!  |
| 459 NA19221 | [2515685 chr10 | 10 | 37488261  | 37529195  | 40935  | 62  | -0.499337 | 0.025695 | 37487986  | 37488536  | 37528890  | 3752950!  |
| 460 NA19221 | [2515685 chr10 | 10 | 37856225  | 37864434  | 8210   | 7   | -0.794595 | 0.07944  | 37855807  | 37856644  | 37861684  | 3791733!  |
| 461 NA19221 | [2515685 chr10 | 10 | 45494243  | 45517699  | 23457  | 60  | -0.264651 | 0.026119 | 45494187  | 45494299  | 45517390  | 4551800!  |
| 462 NA19221 | [2515685 chr10 | 10 | 45901105  | 45962292  | 61188  | 96  | 0.285242  | 0.020707 | 45900211  | 45901999  | 45962017  | 4596256!  |
| 463 NA19221 | [2515685 chr10 | 10 | 46027310  | 46028671  | 1362   | 4   | -0.55832  | 0.10116  | 46026904  | 46027717  | 46028466  | 4602887!  |
| 464 NA19221 | [2515685 chr10 | 10 | 46101676  | 46600786  | 499111 | 863 | -0.270986 | 0.004051 | 46101661  | 46101691  | 46600776  | 4660079!  |
| 465 NA19221 | [2515685 chr10 | 10 | 46610029  | 46702144  | 92116  | 278 | -0.270986 | 0.004051 | 46609739  | 46610319  | 466701888 | 4670240!  |
| 466 NA19221 | [2515685 chr10 | 10 | 46711086  | 47174902  | 463817 | 479 | -0.270986 | 0.004051 | 46711055  | 46711118  | 47174654  | 4717515!  |
| 467 NA19221 | [2515685 chr10 | 10 | 47178367  | 47201977  | 23611  | 59  | -0.270986 | 0.004051 | 47178360  | 47178374  | 47201688  | 4720226!  |
| 468 NA19221 | [2515685 chr10 | 10 | 47503680  | 47824634  | 320955 | 382 | -0.270986 | 0.004051 | 47502626  | 47504735  | 47824064  | 4782520!  |
| 469 NA19221 | [2515685 chr10 | 10 | 47835813  | 47859332  | 23520  | 63  | -0.270986 | 0.004051 | 47835757  | 47835869  | 47859043  | 4785962!  |
| 470 NA19221 | [2515685 chr10 | 10 | 48005621  | 48010695  | 5075   | 9   | 0.337643  | 0.06744  | 48005200  | 48006042  | 48010323  | 4801106!  |
| 471 NA19221 | [2515685 chr10 | 10 | 48288446  | 48349207  | 60762  | 95  | 0.276945  | 0.020757 | 48287551  | 48289341  | 48348932  | 4834948!  |
| 472 NA19221 | [2515685 chr10 | 10 | 48414234  | 48417066  | 2833   | 6   | -0.443843 | 0.082596 | 48413828  | 48414641  | 48416668  | 4841746!  |
| 473 NA19221 | [2515685 chr10 | 10 | 48488814  | 48542632  | 53819  | 97  | -0.319572 | 0.00914  | 48488592  | 48489036  | 48542442  | 4854282!  |
| 474 NA19221 | [2515685 chr10 | 10 | 48554242  | 48584011  | 29770  | 95  | -0.319572 | 0.00914  | 48553697  | 48554787  | 48583989  | 4858403!  |
| 475 NA19221 | [2515685 chr10 | 10 | 48586485  | 48865591  | 279107 | 249 | -0.319572 | 0.00914  | 48586154  | 48586817  | 48865564  | 4886561!  |
| 476 NA19221 | [2515685 chr10 | 10 | 48887243  | 48907424  | 20182  | 54  | -0.283568 | 0.027532 | 48886453  | 48888033  | 48907040  | 4890780!  |
| 477 NA19221 | [2515685 chr10 | 10 | 48923270  | 48927636  | 4367   | 18  | -0.489148 | 0.047687 | 48923088  | 48923452  | 48927550  | 4892772!  |
| 478 NA19221 | [2515685 chr10 | 10 | 48931000  | 48937668  | 6669   | 21  | -0.355153 | 0.04415  | 48930906  | 48931095  | 48937594  | 4893774!  |
| 479 NA19221 | [2515685 chr10 | 10 | 48984793  | 48987579  | 2787   | 6   | -0.4837   | 0.082596 | 48984432  | 48985154  | 48987181  | 4898797!  |
| 480 NA19221 | [2515685 chr10 | 10 | 49018455  | 49024083  | 5629   | 12  | 0.314451  | 0.058404 | 49018856  | 49018856  | 49023584  | 4902458!  |
| 481 NA19221 | [2515685 chr10 | 10 | 50894581  | 50916082  | 21502  | 53  | -0.273967 | 0.027791 | 50894321  | 50894841  | 50915778  | 5091638!  |
| 482 NA19221 | [2515685 chr10 | 10 | 51064781  | 51155987  | 91207  | 88  | -0.302592 | 0.021567 | 51064677  | 51064885  | 51155796  | 5115617!  |
| 483 NA19221 | [2515685 chr10 | 10 | 51186006  | 51187734  | 1729   | 2   | -0.842928 | 0.143061 | 51185282  | 51186730  | 51187158  | 5118831!  |
| 484 NA19221 | [2515685 chr10 | 10 | 51418700  | 51441846  | 23147  | 55  | -0.26337  | 0.027281 | 51418509  | 51418891  | 51441420  | 5144227!  |
| 485 NA19221 | [2515685 chr10 | 10 | 51580352  | 51581394  | 1043   | 2   | 2.568654  | 0.178845 | 51580153  | 51580551  | 51581064  | 5158172!  |
| 486 NA19221 | [2515685 chr10 | 10 | 52088778  | 52131076  | 42299  | 20  | 0.259462  | 0.04524  | 52087892  | 52089664  | 52131068  | 5213108!  |
| 487 NA19221 | [2515685 chr10 | 10 | 56117212  | 56139275  | 22064  | 20  | -1.074761 | 0.045941 | 56115764  | 56118661  | 56138931  | 5613961!  |
| 488 NA19221 | [2515685 chr10 | 10 | 59389778  | 59392606  | 2829   | 5   | -0.494145 | 0.09048  | 59389518  | 59390039  | 59392183  | 5939303!  |
| 489 NA19221 | [2515685 chr10 | 10 | 62097182  | 62098101  | 920    | 3   | -0.907236 | 0.11681  | 62097051  | 62097313  | 62097872  | 6209833!  |
| 490 NA19221 | [2515685 chr10 | 10 | 70943536  | 70945701  | 2166   | 2   | 0.864369  | 0.143061 | 70941950  | 70945122  | 70945524  | 7094587!  |
| 491 NA19221 | [2515685 chr10 | 10 | 75103397  | 75127249  | 23853  | 32  | -0.278834 | 0.035765 | 75102599  | 75104195  | 75126882  | 7512761!  |
| 492 NA19221 | [2515685 chr10 | 10 | 80982478  | 81043786  | 61309  | 59  | 0.266889  | 0.02634  | 80982308  | 80982648  | 81043698  | 8104387!  |
| 493 NA19221 | [2515685 chr10 | 10 | 81144645  | 81171190  | 26546  | 27  | -0.323619 | 0.038936 | 81144276  | 81145014  | 81170995  | 8117138!  |
| 494 NA19221 | [2515685 chr10 | 10 | 81464835  | 81493795  | 28961  | 26  | -0.292916 | 0.039678 | 81464464  | 81465206  | 81491562  | 8149602!  |
| 495 NA19221 | [2515685 chr10 | 10 | 88823459  | 88836422  | 12964  | 16  | -0.321984 | 0.05058  | 88823233  | 88823685  | 88835452  | 8883739!  |
| 496 NA19221 | [2515685 chr10 | 10 | 88866216  | 88962020  | 95805  | 105 | -0.421231 | 0.019763 | 88865617  | 88866816  | 88961639  | 8896240!  |
| 497 NA19221 | [2515685 chr10 | 10 | 88987140  | 89016296  | 29157  | 39  | -0.314962 | 0.032397 | 88987076  | 88987204  | 89014572  | 8901802!  |
| 498 NA19221 | [2515685 chr10 | 10 | 89159031  | 89179870  | 20840  | 37  | -0.407472 | 0.033319 | 89158687  | 89159376  | 89179587  | 8918015!  |

|             |                |    |           |           |        |     |           |          |           |           |           |           |
|-------------|----------------|----|-----------|-----------|--------|-----|-----------|----------|-----------|-----------|-----------|-----------|
| 499 NA19221 | [2515685 chr10 | 10 | 89221150  | 89249961  | 28812  | 34  | -0.317738 | 0.034697 | 89219426  | 89222875  | 89249436  | 89250487  |
| 500 NA19221 | [2515685 chr10 | 10 | 114102241 | 114106477 | 4237   | 5   | 0.836218  | 0.090479 | 114101694 | 114102788 | 114105867 | 114107080 |
| 501 NA19221 | [2515685 chr10 | 10 | 124331349 | 124371112 | 39764  | 45  | 0.315273  | 0.03016  | 124330248 | 124332451 | 124370524 | 124371700 |
| 502 NA19221 | [2515685 chr10 | 10 | 134168766 | 134170259 | 1494   | 17  | -1.372088 | 0.049062 | 134168524 | 134169008 | 134170097 | 134170420 |
| 503 NA19221 | [2515685 chr10 | 10 | 134924761 | 134940785 | 16025  | 33  | 0.48296   | 0.035219 | 134924706 | 134924816 | 134940155 | 134941410 |
| 504 NA19221 | [2515685 chr10 | 10 | 135033449 | 135056081 | 22633  | 23  | 0.36528   | 0.042186 | 135032265 | 135034633 | 135055747 | 135056410 |
| 505 NA19221 | [2515685 chr10 | 10 | 135363859 | 135389814 | 25956  | 24  | 0.346379  | 0.041298 | 135363643 | 135364076 | 135387500 | 135392120 |
| 506 NA19221 | [2515685 chr11 | 11 | 765938    | 824881    | 58944  | 62  | 0.33894   | 0.025695 | 765539    | 766338    | 824514    | 825248    |
| 507 NA19221 | [2515685 chr11 | 11 | 1186336   | 1240807   | 54472  | 61  | 0.328725  | 0.025904 | 1186024   | 1186649   | 1240287   | 1241328   |
| 508 NA19221 | [2515685 chr11 | 11 | 2999672   | 3181877   | 182206 | 5   | -0.575239 | 0.090481 | 2949255   | 3002762   | 3179993   | 3183760   |
| 509 NA19221 | [2515685 chr11 | 11 | 3596686   | 3602209   | 5524   | 7   | 0.405441  | 0.076469 | 3596097   | 3597275   | 3601914   | 3602500   |
| 510 NA19221 | [2515685 chr11 | 11 | 3628748   | 3632795   | 4048   | 6   | -2.288067 | 0.084909 | 3625722   | 3631775   | 3632594   | 3632996   |
| 511 NA19221 | [2515685 chr11 | 11 | 4498436   | 4515898   | 17463  | 4   | -0.599607 | 0.106699 | 4497766   | 4499106   | 4515720   | 4516070   |
| 512 NA19221 | [2515685 chr11 | 11 | 4873771   | 4877621   | 3851   | 3   | -0.616339 | 0.119055 | 4873319   | 4874224   | 4877356   | 4877880   |
| 513 NA19221 | [2515685 chr11 | 11 | 4924115   | 4932599   | 8485   | 9   | 0.521997  | 0.06744  | 4923827   | 4924403   | 4931948   | 4933250   |
| 514 NA19221 | [2515685 chr11 | 11 | 5741269   | 5765993   | 24725  | 32  | 2.526069  | 0.053805 | 5741059   | 5741480   | 5765632   | 5766350   |
| 515 NA19221 | [2515685 chr11 | 11 | 5828009   | 5843042   | 15034  | 13  | -0.855539 | 0.056113 | 5827813   | 5828206   | 5839952   | 5849170   |
| 516 NA19221 | [2515685 chr11 | 11 | 11831868  | 11833089  | 1222   | 2   | 0.988754  | 0.168498 | 11831412  | 11832324  | 11832853  | 11833320  |
| 517 NA19221 | [2515685 chr11 | 11 | 18888865  | 18890116  | 1252   | 4   | 0.514754  | 0.10116  | 18888753  | 18888978  | 18889854  | 18890370  |
| 518 NA19221 | [2515685 chr11 | 11 | 18903443  | 18923029  | 19587  | 29  | 1.133176  | 0.037931 | 18897800  | 18906533  | 18919939  | 18928450  |
| 519 NA19221 | [2515685 chr11 | 11 | 28965605  | 28969186  | 3582   | 5   | 4.328743  | 0.172492 | 28965284  | 28965927  | 28968702  | 28969670  |
| 520 NA19221 | [2515685 chr11 | 11 | 48284073  | 48284771  | 699    | 2   | 1.108889  | 0.14306  | 48283862  | 48284285  | 48284572  | 48284970  |
| 521 NA19221 | [2515685 chr11 | 11 | 49040083  | 49044447  | 4365   | 7   | -0.406623 | 0.076469 | 49039543  | 49040624  | 49044344  | 49044550  |
| 522 NA19221 | [2515685 chr11 | 11 | 49665830  | 49715838  | 50009  | 36  | 0.433944  | 0.033905 | 49665251  | 49666410  | 49712748  | 49721980  |
| 523 NA19221 | [2515685 chr11 | 11 | 55124643  | 55212658  | 88016  | 98  | -0.896901 | 0.020879 | 55124460  | 55124827  | 55209568  | 55215750  |
| 524 NA19221 | [2515685 chr11 | 11 | 60722802  | 60776576  | 53775  | 71  | 0.350174  | 0.024043 | 60722435  | 60723170  | 60776342  | 60776810  |
| 525 NA19221 | [2515685 chr11 | 11 | 67511469  | 67576043  | 64575  | 88  | 0.267809  | 0.021567 | 67509455  | 67513484  | 67575712  | 67576370  |
| 526 NA19221 | [2515685 chr11 | 11 | 73815147  | 73817979  | 2833   | 2   | -0.798684 | 0.143061 | 73812981  | 73817313  | 73817746  | 73818210  |
| 527 NA19221 | [2515685 chr11 | 11 | 90533917  | 90537948  | 4032   | 5   | -0.676305 | 0.090738 | 90533689  | 90534146  | 90537532  | 90538360  |
| 528 NA19221 | [2515685 chr11 | 11 | 93323966  | 93328851  | 4886   | 5   | -0.910695 | 0.091089 | 93323530  | 93324402  | 93328208  | 93329490  |
| 529 NA19221 | [2515685 chr11 | 11 | 106744846 | 106751061 | 6216   | 9   | -0.971599 | 0.070445 | 106744561 | 106745131 | 106747971 | 106754830 |
| 530 NA19221 | [2515685 chr11 | 11 | 134107699 | 134112290 | 4592   | 5   | 0.907734  | 0.094733 | 134106591 | 134108808 | 134111845 | 134112730 |
| 531 NA19221 | [2515685 chr12 | 12 | 18973     | 25210     | 6238   | 5   | 0.548258  | 0.09048  | 18651     | 19295     | 24634     | 25786     |
| 532 NA19221 | [2515685 chr12 | 12 | 736840    | 744802    | 7963   | 9   | 1.004251  | 0.067439 | 736616    | 737064    | 744211    | 745390    |
| 533 NA19221 | [2515685 chr12 | 12 | 2112534   | 2127840   | 15307  | 16  | 0.795314  | 0.051017 | 2109107   | 2115961   | 2127279   | 2128400   |
| 534 NA19221 | [2515685 chr12 | 12 | 6113530   | 6118188   | 4659   | 4   | 0.806411  | 0.102226 | 6111640   | 6115421   | 6117816   | 6118560   |
| 535 NA19221 | [2515685 chr12 | 12 | 8262986   | 8271843   | 8858   | 20  | 0.313443  | 0.045239 | 8262374   | 8263598   | 8271580   | 8272100   |
| 536 NA19221 | [2515685 chr12 | 12 | 9758595   | 9762321   | 3727   | 2   | 0.782987  | 0.143061 | 9757260   | 9759931   | 9760866   | 9763770   |
| 537 NA19221 | [2515685 chr12 | 12 | 10456187  | 10491900  | 35714  | 21  | -0.484754 | 0.044914 | 10423567  | 10459687  | 10488400  | 10553940  |
| 538 NA19221 | [2515685 chr12 | 12 | 11072324  | 11142012  | 69689  | 85  | -0.449072 | 0.022012 | 11071841  | 11072807  | 11141608  | 11142410  |
| 539 NA19221 | [2515685 chr12 | 12 | 11169527  | 11183611  | 14085  | 15  | -0.307136 | 0.052238 | 11169350  | 11169704  | 11183009  | 11184210  |
| 540 NA19221 | [2515685 chr12 | 12 | 11398899  | 11463223  | 64325  | 65  | -0.382785 | 0.025103 | 11398591  | 11399207  | 11459990  | 11466450  |
| 541 NA19221 | [2515685 chr12 | 12 | 18279045  | 18284518  | 5474   | 5   | -1.016965 | 0.091262 | 18273452  | 18282545  | 18284366  | 18284670  |
| 542 NA19221 | [2515685 chr12 | 12 | 20922047  | 20926114  | 4068   | 16  | -0.296241 | 0.05257  | 20921878  | 20922216  | 20925892  | 20926330  |
| 543 NA19221 | [2515685 chr12 | 12 | 30286785  | 30295818  | 9034   | 7   | -0.505873 | 0.081007 | 30285726  | 30287845  | 30295621  | 30296010  |
| 544 NA19221 | [2515685 chr12 | 12 | 31225531  | 31229101  | 3571   | 5   | -0.62921  | 0.10907  | 31225094  | 31225969  | 31228818  | 31229380  |
| 545 NA19221 | [2515685 chr12 | 12 | 31255510  | 31275218  | 19709  | 21  | 0.272606  | 0.04415  | 31254679  | 31256341  | 31274251  | 31276180  |
| 546 NA19221 | [2515685 chr12 | 12 | 34099919  | 34108168  | 8250   | 12  | -0.87886  | 0.060623 | 34099639  | 34100199  | 34107972  | 34108360  |
| 547 NA19221 | [2515685 chr12 | 12 | 34244904  | 34651194  | 406291 | 150 | 0.250992  | 0.016519 | 34238230  | 34248404  | 34649713  | 34652670  |
| 548 NA19221 | [2515685 chr12 | 12 | 36218223  | 36229027  | 10805  | 10  | 0.48163   | 0.063979 | 36216143  | 36220304  | 36228905  | 36229150  |
| 549 NA19221 | [2515685 chr12 | 12 | 36728958  | 36737753  | 8796   | 16  | 0.4736    | 0.05058  | 36728858  | 36729059  | 36736974  | 36738530  |
| 550 NA19221 | [2515685 chr12 | 12 | 37036093  | 37041256  | 5164   | 4   | -0.627041 | 0.101416 | 37035978  | 37036208  | 37041139  | 37041370  |
| 551 NA19221 | [2515685 chr12 | 12 | 56139356  | 56151897  | 12542  | 16  | 0.327418  | 0.05058  | 56139046  | 56139666  | 56151647  | 56152140  |
| 552 NA19221 | [2515685 chr12 | 12 | 62216782  | 62218151  | 1370   | 2   | -0.822055 | 0.143063 | 62216521  | 62217044  | 62217696  | 62218600  |
| 553 NA19221 | [2515685 chr12 | 12 | 69156912  | 69167896  | 10985  | 11  | 0.88125   | 0.061151 | 69138649  | 69160412  | 69164396  | 69215010  |

|             |                |    |           |            |        |     |           |          |           |           |           |           |
|-------------|----------------|----|-----------|------------|--------|-----|-----------|----------|-----------|-----------|-----------|-----------|
| 554 NA19221 | [2515685 chr12 | 12 | 78656134  | 78665261   | 9128   | 9   | -0.844323 | 0.068546 | 78654687  | 78657582  | 78664736  | 78665787  |
| 555 NA19221 | [2515685 chr12 | 12 | 90783831  | 90788162   | 4332   | 6   | -0.455143 | 0.083071 | 90783615  | 90784047  | 90787837  | 90788481  |
| 556 NA19221 | [2515685 chr12 | 12 | 96834935  | 96841206   | 6272   | 6   | -0.416004 | 0.082596 | 96834725  | 96835145  | 96840650  | 96841762  |
| 557 NA19221 | [2515685 chr12 | 12 | 98296195  | 98302030   | 5836   | 12  | -0.814179 | 0.05851  | 98295885  | 98296506  | 98298530  | 98305947  |
| 558 NA19221 | [2515685 chr12 | 12 | 128919453 | 128926845  | 7393   | 7   | -0.393636 | 0.076469 | 128919049 | 128919858 | 128926529 | 12892716  |
| 559 NA19221 | [2515685 chr12 | 12 | 129133583 | 1291445603 | 12021  | 13  | 0.306046  | 0.056113 | 129132832 | 129134334 | 129145336 | 129145871 |
| 560 NA19221 | [2515685 chr12 | 12 | 129395501 | 129397499  | 1999   | 14  | 0.555518  | 0.054073 | 129395008 | 129395994 | 129397172 | 12939782  |
| 561 NA19221 | [2515685 chr12 | 12 | 130315291 | 130317296  | 2006   | 13  | 0.570515  | 0.056113 | 130315089 | 130315493 | 130317207 | 13031738  |
| 562 NA19221 | [2515685 chr12 | 12 | 130335954 | 130341588  | 5635   | 8   | -0.557524 | 0.071531 | 130335729 | 130336179 | 130341196 | 13034198  |
| 563 NA19221 | [2515685 chr12 | 12 | 130390907 | 130395802  | 4896   | 7   | 0.50362   | 0.076469 | 130390718 | 130391097 | 130395448 | 13039615  |
| 564 NA19221 | [2515685 chr12 | 12 | 130779212 | 130796135  | 16924  | 26  | 0.426278  | 0.039678 | 130779031 | 130779393 | 130795845 | 13079642  |
| 565 NA19221 | [2515685 chr12 | 12 | 130829328 | 130830361  | 1034   | 2   | 0.794012  | 0.143061 | 130828952 | 130829705 | 130830203 | 13083051  |
| 566 NA19221 | [2515685 chr12 | 12 | 131021452 | 131055851  | 34400  | 31  | 0.267234  | 0.036357 | 131020307 | 131022597 | 131054028 | 13105767  |
| 567 NA19221 | [2515685 chr12 | 12 | 132138306 | 132144356  | 6051   | 6   | 0.448392  | 0.082596 | 132136592 | 132140021 | 132143390 | 13214532  |
| 568 NA19221 | [2515685 chr13 | 13 | 18217561  | 18277248   | 59688  | 21  | 0.487442  | 0.044149 | 18217404  | 18217719  | 18275111  | 18279381  |
| 569 NA19221 | [2515685 chr13 | 13 | 19357875  | 19366384   | 8510   | 13  | -2.785125 | 0.086842 | 19357555  | 19358196  | 19363094  | 19369671  |
| 570 NA19221 | [2515685 chr13 | 13 | 20436112  | 20439421   | 3310   | 2   | 0.849864  | 0.143061 | 20435513  | 20436712  | 20437245  | 20441597  |
| 571 NA19221 | [2515685 chr13 | 13 | 25941397  | 25944844   | 3448   | 2   | -0.791765 | 0.143061 | 25940659  | 25942135  | 25943882  | 25945807  |
| 572 NA19221 | [2515685 chr13 | 13 | 25947233  | 25950398   | 3166   | 3   | 4.30079   | 0.190422 | 25946194  | 25948272  | 25949415  | 25951387  |
| 573 NA19221 | [2515685 chr13 | 13 | 30418908  | 30426735   | 7828   | 5   | -0.472491 | 0.09048  | 30413462  | 30423606  | 30426489  | 30426982  |
| 574 NA19221 | [2515685 chr13 | 13 | 31430484  | 31437209   | 6726   | 7   | -0.841233 | 0.079149 | 31430130  | 31430838  | 31436488  | 31437937  |
| 575 NA19221 | [2515685 chr13 | 13 | 56611711  | 56645734   | 34024  | 47  | 0.657725  | 0.029512 | 56610946  | 56612477  | 56645321  | 56646147  |
| 576 NA19221 | [2515685 chr13 | 13 | 65253672  | 65260395   | 6724   | 8   | -0.422618 | 0.075055 | 65253468  | 65253876  | 65259517  | 65261272  |
| 577 NA19221 | [2515685 chr13 | 13 | 69633905  | 69673289   | 39385  | 42  | 0.72468   | 0.031486 | 69633412  | 69634399  | 69672985  | 69673592  |
| 578 NA19221 | [2515685 chr13 | 13 | 82512221  | 82524523   | 12303  | 14  | -0.369045 | 0.056009 | 82512013  | 82512429  | 82524085  | 82524962  |
| 579 NA19221 | [2515685 chr13 | 13 | 82609136  | 82614640   | 5505   | 5   | -0.50709  | 0.092708 | 82608849  | 82609423  | 82614351  | 82614931  |
| 580 NA19221 | [2515685 chr13 | 13 | 109215660 | 109217089  | 1430   | 5   | 0.856598  | 0.090481 | 109215230 | 109216090 | 109216885 | 10921729  |
| 581 NA19221 | [2515685 chr13 | 13 | 113079647 | 113086836  | 7190   | 3   | 0.95567   | 0.122953 | 113078890 | 113080404 | 113082138 | 11309434  |
| 582 NA19221 | [2515685 chr13 | 13 | 113106211 | 113117883  | 11673  | 15  | 0.294641  | 0.052239 | 113105623 | 113106800 | 113117631 | 11311813  |
| 583 NA19221 | [2515685 chr13 | 13 | 113137077 | 113148338  | 11262  | 5   | 0.484622  | 0.09048  | 113136514 | 113137641 | 113147649 | 11314902  |
| 584 NA19221 | [2515685 chr14 | 14 | 18527136  | 18542743   | 15608  | 7   | -1.515207 | 0.076807 | 18526373  | 18527899  | 18541619  | 18543867  |
| 585 NA19221 | [2515685 chr14 | 14 | 19265232  | 19401406   | 136175 | 114 | -0.268527 | 0.019097 | 19261661  | 19268804  | 19401094  | 19401711  |
| 586 NA19221 | [2515685 chr14 | 14 | 19619335  | 19625484   | 6150   | 3   | 3.726653  | 0.239501 | 19612261  | 19624114  | 19625018  | 19625951  |
| 587 NA19221 | [2515685 chr14 | 14 | 20412037  | 20413805   | 1769   | 3   | 0.651271  | 0.116809 | 20411743  | 20412332  | 20413520  | 20414097  |
| 588 NA19221 | [2515685 chr14 | 14 | 21790861  | 21803189   | 12329  | 8   | -0.424425 | 0.074489 | 21790551  | 21791172  | 21802934  | 21803441  |
| 589 NA19221 | [2515685 chr14 | 14 | 32022775  | 32026140   | 3366   | 2   | -1.204576 | 0.143061 | 32022274  | 32023276  | 32023749  | 32028537  |
| 590 NA19221 | [2515685 chr14 | 14 | 40895652  | 40897384   | 1733   | 2   | -1.079834 | 0.190231 | 40895015  | 40896289  | 40897151  | 40897611  |
| 591 NA19221 | [2515685 chr14 | 14 | 59539644  | 59549095   | 9452   | 11  | -0.405691 | 0.0614   | 59539381  | 59539908  | 59548863  | 59549327  |
| 592 NA19221 | [2515685 chr14 | 14 | 73063171  | 73122855   | 59685  | 54  | 0.889828  | 0.027777 | 73061866  | 73064476  | 73122227  | 73123482  |
| 593 NA19221 | [2515685 chr14 | 14 | 77188146  | 77202505   | 14360  | 18  | 0.262345  | 0.047687 | 77187915  | 77188377  | 77201428  | 77203582  |
| 594 NA19221 | [2515685 chr14 | 14 | 102443830 | 102468079  | 24250  | 26  | 0.304254  | 0.039678 | 102443486 | 102444175 | 102467664 | 10246849  |
| 595 NA19221 | [2515685 chr14 | 14 | 103064383 | 103087432  | 23050  | 27  | 0.292617  | 0.038936 | 103064013 | 103064753 | 103087140 | 10308772  |
| 596 NA19221 | [2515685 chr14 | 14 | 103422145 | 103432153  | 10009  | 13  | 0.354186  | 0.056113 | 103421925 | 103422365 | 103431610 | 10343269  |
| 597 NA19221 | [2515685 chr14 | 14 | 104574839 | 104759520  | 184682 | 184 | 0.267053  | 0.014931 | 104567554 | 104579618 | 104759055 | 10475998  |
| 598 NA19221 | [2515685 chr14 | 14 | 104766812 | 104778505  | 11694  | 145 | -0.329097 | 0.016802 | 104766457 | 104767167 | 104778286 | 10477872  |
| 599 NA19221 | [2515685 chr14 | 14 | 105014132 | 105023141  | 9010   | 12  | 0.452201  | 0.058404 | 105013898 | 105014366 | 105022902 | 10502338  |
| 600 NA19221 | [2515685 chr15 | 15 | 18468372  | 18486535   | 18164  | 30  | 0.320841  | 0.036938 | 18467866  | 18468879  | 18486285  | 18486781  |
| 601 NA19221 | [2515685 chr15 | 15 | 18555968  | 18557255   | 1288   | 2   | -0.749268 | 0.143061 | 18555543  | 18556394  | 18556441  | 18558061  |
| 602 NA19221 | [2515685 chr15 | 15 | 18824476  | 18894799   | 70324  | 74  | -0.634853 | 0.023519 | 18824302  | 18824650  | 18894022  | 18895577  |
| 603 NA19221 | [2515685 chr15 | 15 | 18906667  | 18909258   | 2592   | 5   | 0.648492  | 0.09048  | 18906373  | 18906961  | 18909066  | 18909457  |
| 604 NA19221 | [2515685 chr15 | 15 | 19108564  | 19219791   | 111228 | 144 | -0.411566 | 0.016922 | 19108319  | 19108810  | 19219313  | 19220261  |
| 605 NA19221 | [2515685 chr15 | 15 | 19338127  | 19460889   | 122763 | 138 | -0.344477 | 0.017256 | 19338043  | 19338211  | 19460583  | 19461191  |
| 606 NA19221 | [2515685 chr15 | 15 | 19480237  | 19497904   | 17668  | 31  | 0.296066  | 0.036338 | 19479214  | 19481261  | 19497654  | 19498157  |
| 607 NA19221 | [2515685 chr15 | 15 | 19541235  | 19542592   | 1358   | 2   | -0.739383 | 0.143061 | 19540890  | 19541581  | 19542371  | 19542817  |
| 608 NA19221 | [2515685 chr15 | 15 | 19663013  | 19790690   | 127678 | 32  | -0.387289 | 0.036325 | 19662785  | 19663241  | 19790503  | 19790877  |

|             |                |    |           |           |        |     |           |          |           |           |           |           |
|-------------|----------------|----|-----------|-----------|--------|-----|-----------|----------|-----------|-----------|-----------|-----------|
| 609 NA19221 | [2515685 chr15 | 15 | 19805080  | 20003481  | 198402 | 195 | -0.44684  | 0.01457  | 19804866  | 19805294  | 20003316  | 20003644  |
| 610 NA19221 | [2515685 chr15 | 15 | 20071962  | 20092266  | 20305  | 15  | -0.731659 | 0.052239 | 20068638  | 20074266  | 20091884  | 20092644  |
| 611 NA19221 | [2515685 chr15 | 15 | 20228094  | 20234328  | 6235   | 12  | 0.410883  | 0.058404 | 20226486  | 20229703  | 20233781  | 20234871  |
| 612 NA19221 | [2515685 chr15 | 15 | 20367533  | 20383831  | 16299  | 18  | -0.53725  | 0.048739 | 20367145  | 20367922  | 20383079  | 20384581  |
| 613 NA19221 | [2515685 chr15 | 15 | 20761655  | 20806379  | 44725  | 66  | -0.279173 | 0.025054 | 20761082  | 20762228  | 20806280  | 20806471  |
| 614 NA19221 | [2515685 chr15 | 15 | 20865501  | 20868097  | 2597   | 5   | 0.670308  | 0.09048  | 20865204  | 20865798  | 20867905  | 20868291  |
| 615 NA19221 | [2515685 chr15 | 15 | 20882855  | 20884053  | 1199   | 5   | 0.464729  | 0.09048  | 20882403  | 20883308  | 20883785  | 20884321  |
| 616 NA19221 | [2515685 chr15 | 15 | 21049779  | 21061461  | 11683  | 9   | -0.432104 | 0.06744  | 21049217  | 21050342  | 21061305  | 21061611  |
| 617 NA19221 | [2515685 chr15 | 15 | 21605983  | 21614602  | 8620   | 8   | 0.742884  | 0.079786 | 21605507  | 21606459  | 21612298  | 21636691  |
| 618 NA19221 | [2515685 chr15 | 15 | 22055841  | 22059707  | 3867   | 4   | 0.538764  | 0.101159 | 22055443  | 22056239  | 22057403  | 22062041  |
| 619 NA19221 | [2515685 chr15 | 15 | 22649030  | 22651236  | 2207   | 2   | -0.753826 | 0.149057 | 22648819  | 22649242  | 22650852  | 22651621  |
| 620 NA19221 | [2515685 chr15 | 15 | 24986053  | 24992250  | 6198   | 7   | 0.839141  | 0.076469 | 24985426  | 24986680  | 24991680  | 24992821  |
| 621 NA19221 | [2515685 chr15 | 15 | 26135294  | 26137335  | 2042   | 4   | 0.704179  | 0.101158 | 26134997  | 26135591  | 26137216  | 26137451  |
| 622 NA19221 | [2515685 chr15 | 15 | 26331811  | 26343818  | 12008  | 25  | 0.420977  | 0.040464 | 26331265  | 26332358  | 26342288  | 26345344  |
| 623 NA19221 | [2515685 chr15 | 15 | 26536521  | 26542764  | 6244   | 12  | 0.397984  | 0.058404 | 26534914  | 26538129  | 26542214  | 26543311  |
| 624 NA19221 | [2515685 chr15 | 15 | 26695119  | 26697710  | 2592   | 5   | 0.636886  | 0.09048  | 26694927  | 26695312  | 26697414  | 26698001  |
| 625 NA19221 | [2515685 chr15 | 15 | 26756997  | 26780620  | 23624  | 37  | -0.322912 | 0.033517 | 26756810  | 26757185  | 26780238  | 26781001  |
| 626 NA19221 | [2515685 chr15 | 15 | 27133105  | 27134889  | 1785   | 5   | 0.651765  | 0.09048  | 27132904  | 27133306  | 27134660  | 27135111  |
| 627 NA19221 | [2515685 chr15 | 15 | 27689068  | 27690372  | 1305   | 2   | -1.548389 | 0.151541 | 27688480  | 27689656  | 27690197  | 27690541  |
| 628 NA19221 | [2515685 chr15 | 15 | 28183172  | 28214153  | 30982  | 63  | -0.349799 | 0.02549  | 28182925  | 28183419  | 28213965  | 28214341  |
| 629 NA19221 | [2515685 chr15 | 15 | 28277261  | 28292842  | 15582  | 14  | -0.51239  | 0.054072 | 28276837  | 28277686  | 28292676  | 28293001  |
| 630 NA19221 | [2515685 chr15 | 15 | 28315997  | 28328106  | 12110  | 10  | -0.559799 | 0.063979 | 28315596  | 28316398  | 28327315  | 28328891  |
| 631 NA19221 | [2515685 chr15 | 15 | 28403430  | 28410867  | 7438   | 11  | -0.548924 | 0.063175 | 28403057  | 28403804  | 28410713  | 28411021  |
| 632 NA19221 | [2515685 chr15 | 15 | 28467160  | 28472817  | 5658   | 11  | -0.588766 | 0.061001 | 28466786  | 28467535  | 28472801  | 28472831  |
| 633 NA19221 | [2515685 chr15 | 15 | 28514598  | 28549382  | 34785  | 66  | -0.376599 | 0.025011 | 28514548  | 28514648  | 28549275  | 28549491  |
| 634 NA19221 | [2515685 chr15 | 15 | 28615711  | 28616705  | 995    | 3   | -0.607952 | 0.116809 | 28615510  | 28615913  | 28616453  | 28616951  |
| 635 NA19221 | [2515685 chr15 | 15 | 28652184  | 28663984  | 11801  | 23  | -0.460603 | 0.042186 | 28651945  | 28652423  | 28663877  | 28664091  |
| 636 NA19221 | [2515685 chr15 | 15 | 28671926  | 28678234  | 6309   | 13  | -0.416108 | 0.056113 | 28671675  | 28672177  | 28678222  | 28678241  |
| 637 NA19221 | [2515685 chr15 | 15 | 30276289  | 30324788  | 48500  | 44  | -0.29808  | 0.015283 | 30276223  | 30276356  | 30324652  | 30324921  |
| 638 NA19221 | [2515685 chr15 | 15 | 30329989  | 30397216  | 67228  | 86  | -0.29808  | 0.015283 | 30329898  | 30330081  | 30396825  | 30397601  |
| 639 NA19221 | [2515685 chr15 | 15 | 30401889  | 30420287  | 18399  | 23  | -0.29808  | 0.015283 | 30401680  | 30402099  | 30420010  | 30420561  |
| 640 NA19221 | [2515685 chr15 | 15 | 30483175  | 30514406  | 31232  | 62  | -0.339915 | 0.025695 | 30482988  | 30483363  | 30514167  | 30514641  |
| 641 NA19221 | [2515685 chr15 | 15 | 30542002  | 30550980  | 8979   | 18  | -0.341087 | 0.047687 | 30541786  | 30542219  | 30550857  | 30551101  |
| 642 NA19221 | [2515685 chr15 | 15 | 30569947  | 30666061  | 96115  | 167 | -0.318434 | 0.015699 | 30569252  | 30570643  | 30665844  | 30666271  |
| 643 NA19221 | [2515685 chr15 | 15 | 32464299  | 32656877  | 192579 | 194 | 0.465332  | 0.014579 | 32464005  | 32464593  | 32656150  | 32657601  |
| 644 NA19221 | [2515685 chr15 | 15 | 39898284  | 39946944  | 48661  | 22  | 0.262261  | 0.043134 | 39898004  | 39898565  | 39944640  | 39996091  |
| 645 NA19221 | [2515685 chr15 | 15 | 40229367  | 40240228  | 10862  | 14  | 0.293624  | 0.054072 | 40229141  | 40229593  | 40239593  | 40240861  |
| 646 NA19221 | [2515685 chr15 | 15 | 42905343  | 42906197  | 855    | 3   | -0.699744 | 0.116809 | 42905218  | 42905469  | 42905981  | 42906411  |
| 647 NA19221 | [2515685 chr15 | 15 | 43104933  | 43113061  | 8129   | 11  | 0.367031  | 0.061001 | 43104660  | 43105206  | 43112481  | 43113641  |
| 648 NA19221 | [2515685 chr15 | 15 | 43153369  | 43154013  | 645    | 2   | -0.825396 | 0.143061 | 43153155  | 43153584  | 43153678  | 43154341  |
| 649 NA19221 | [2515685 chr15 | 15 | 51573153  | 51577284  | 4132   | 2   | -0.754731 | 0.143061 | 51572719  | 51573587  | 5157968   | 51577601  |
| 650 NA19221 | [2515685 chr15 | 15 | 53021943  | 53031106  | 9164   | 4   | -0.715772 | 0.117018 | 53021266  | 53022621  | 53030995  | 53031211  |
| 651 NA19221 | [2515685 chr15 | 15 | 54503995  | 54547469  | 43475  | 25  | -0.251071 | 0.041113 | 54474238  | 54506299  | 54547227  | 54547711  |
| 652 NA19221 | [2515685 chr15 | 15 | 74671388  | 74682822  | 11435  | 9   | 0.866087  | 0.069092 | 74671122  | 74671654  | 74680518  | 74689511  |
| 653 NA19221 | [2515685 chr15 | 15 | 75117585  | 75119946  | 2362   | 4   | 1.021409  | 0.101159 | 75117343  | 75117827  | 75119741  | 75120151  |
| 654 NA19221 | [2515685 chr15 | 15 | 82646599  | 82692604  | 46006  | 64  | 0.259115  | 0.02529  | 82646434  | 82646764  | 82692232  | 82692971  |
| 655 NA19221 | [2515685 chr15 | 15 | 82869847  | 82893636  | 23790  | 8   | -0.369165 | 0.071531 | 82860467  | 82872151  | 82892955  | 82894311  |
| 656 NA19221 | [2515685 chr15 | 15 | 85700954  | 85702403  | 1450   | 3   | -0.620247 | 0.116809 | 85700660  | 85701248  | 85702233  | 85702571  |
| 657 NA19221 | [2515685 chr15 | 15 | 91625918  | 91628917  | 3000   | 2   | -0.898102 | 0.143061 | 91624747  | 91627089  | 91628434  | 91629401  |
| 658 NA19221 | [2515685 chr15 | 15 | 98234084  | 98240716  | 6633   | 8   | 0.796422  | 0.073616 | 98233842  | 98234327  | 98239350  | 98242081  |
| 659 NA19221 | [2515685 chr15 | 15 | 99664319  | 99667722  | 3404   | 4   | 0.517498  | 0.10116  | 99664041  | 99664598  | 99667231  | 99668211  |
| 660 NA19221 | [2515685 chr15 | 15 | 99804019  | 99808092  | 4074   | 6   | 0.426974  | 0.082596 | 99803466  | 99804573  | 99807825  | 99808361  |
| 661 NA19221 | [2515685 chr15 | 15 | 100090726 | 100126066 | 35341  | 117 | 0.301309  | 0.018705 | 100090390 | 100091062 | 100125853 | 100126281 |
| 662 NA19221 | [2515685 chr15 | 15 | 100266886 | 100337837 | 70952  | 63  | 0.450637  | 0.02549  | 100264210 | 100269190 | 100336759 | 10033891  |
| 663 NA19221 | [2515685 chr16 | 16 | 628610    | 793966    | 165357 | 166 | 0.323287  | 0.015703 | 628150    | 629070    | 793603    | 794325    |

|             |                |    |          |          |        |     |           |          |          |          |          |          |
|-------------|----------------|----|----------|----------|--------|-----|-----------|----------|----------|----------|----------|----------|
| 664 NA19221 | [2515685 chr16 | 16 | 5287117  | 5290637  | 3521   | 2   | 0.819867  | 0.15985  | 5286149  | 5288085  | 5288751  | 5293272  |
| 665 NA19221 | [2515685 chr16 | 16 | 12582280 | 12585531 | 3252   | 8   | 0.366157  | 0.071531 | 12582140 | 12582421 | 12585382 | 12585681 |
| 666 NA19221 | [2515685 chr16 | 16 | 14913066 | 14929240 | 16175  | 45  | 0.296093  | 0.03016  | 14912404 | 14913728 | 14928914 | 14929561 |
| 667 NA19221 | [2515685 chr16 | 16 | 14933396 | 14940403 | 7008   | 13  | 0.340115  | 0.056113 | 14932517 | 14934275 | 14939644 | 14941161 |
| 668 NA19221 | [2515685 chr16 | 16 | 15123202 | 15158689 | 35488  | 71  | 0.275017  | 0.024011 | 15122434 | 15123970 | 15158568 | 15158811 |
| 669 NA19221 | [2515685 chr16 | 16 | 15711970 | 15715684 | 3715   | 4   | 0.524308  | 0.10116  | 15711487 | 15712454 | 15715332 | 15716031 |
| 670 NA19221 | [2515685 chr16 | 16 | 16633469 | 16639120 | 5652   | 4   | 0.889454  | 0.10116  | 16632502 | 16634437 | 16638386 | 16639851 |
| 671 NA19221 | [2515685 chr16 | 16 | 18341820 | 18354544 | 12725  | 41  | 0.30708   | 0.031597 | 18341531 | 18342110 | 18354364 | 18354721 |
| 672 NA19221 | [2515685 chr16 | 16 | 18402108 | 18403139 | 1032   | 3   | 0.668818  | 0.116809 | 18401888 | 18402328 | 18402477 | 18403801 |
| 673 NA19221 | [2515685 chr16 | 16 | 20419891 | 20441474 | 21584  | 24  | -0.849046 | 0.041684 | 20419728 | 20420055 | 20441310 | 20441631 |
| 674 NA19221 | [2515685 chr16 | 16 | 21336761 | 21341982 | 5222   | 12  | 0.356905  | 0.058404 | 21335940 | 21337583 | 21341567 | 21342391 |
| 675 NA19221 | [2515685 chr16 | 16 | 21419656 | 21502620 | 82965  | 80  | 0.349722  | 0.02262  | 21419375 | 21419938 | 21501101 | 21504141 |
| 676 NA19221 | [2515685 chr16 | 16 | 21769129 | 21774260 | 5132   | 12  | 0.356905  | 0.058404 | 21768405 | 21769853 | 21773845 | 21774671 |
| 677 NA19221 | [2515685 chr16 | 16 | 22108292 | 22118438 | 10147  | 10  | 0.354168  | 0.063979 | 22107905 | 22108679 | 22118027 | 22118851 |
| 678 NA19221 | [2515685 chr16 | 16 | 22434566 | 22439784 | 5219   | 13  | 0.3445    | 0.056113 | 22434151 | 22434982 | 22438962 | 22440601 |
| 679 NA19221 | [2515685 chr16 | 16 | 22455430 | 22618743 | 163314 | 155 | 0.29323   | 0.016251 | 22455152 | 22455708 | 22617181 | 22620301 |
| 680 NA19221 | [2515685 chr16 | 16 | 28193050 | 28196378 | 3329   | 3   | 0.608354  | 0.116809 | 28187027 | 28194936 | 28196158 | 28196591 |
| 681 NA19221 | [2515685 chr16 | 16 | 28303945 | 28307309 | 3365   | 5   | 0.504546  | 0.09048  | 28302232 | 28305658 | 28307202 | 28307411 |
| 682 NA19221 | [2515685 chr16 | 16 | 28324917 | 28332627 | 7711   | 5   | -0.555511 | 0.09048  | 28324665 | 28325169 | 28332615 | 28332631 |
| 683 NA19221 | [2515685 chr16 | 16 | 28388464 | 28417190 | 28727  | 35  | 0.317543  | 0.034198 | 28387703 | 28389225 | 28416600 | 28417781 |
| 684 NA19221 | [2515685 chr16 | 16 | 28507651 | 28533918 | 26268  | 38  | 0.281839  | 0.03282  | 28507328 | 28507974 | 28533647 | 28534181 |
| 685 NA19221 | [2515685 chr16 | 16 | 28620329 | 28628077 | 7749   | 5   | -0.555497 | 0.090479 | 28620317 | 28620341 | 28627777 | 28628371 |
| 686 NA19221 | [2515685 chr16 | 16 | 28645635 | 28649003 | 3369   | 5   | 0.504545  | 0.09048  | 28645528 | 28645743 | 28647286 | 28650721 |
| 687 NA19221 | [2515685 chr16 | 16 | 29370329 | 29394981 | 24653  | 33  | 0.33701   | 0.035219 | 29370019 | 29370639 | 29394091 | 29395871 |
| 688 NA19221 | [2515685 chr16 | 16 | 30678084 | 30706680 | 28597  | 40  | 0.271142  | 0.031989 | 30677704 | 30678464 | 30706417 | 30709641 |
| 689 NA19221 | [2515685 chr16 | 16 | 31894079 | 31987226 | 93148  | 146 | 0.351682  | 0.016744 | 31893656 | 31894503 | 31986803 | 31987651 |
| 690 NA19221 | [2515685 chr16 | 16 | 32073573 | 32075147 | 1575   | 4   | 0.961482  | 0.101159 | 32073268 | 32073879 | 32074517 | 32075771 |
| 691 NA19221 | [2515685 chr16 | 16 | 32095676 | 32123795 | 28120  | 80  | 0.350859  | 0.02262  | 32094797 | 32096556 | 32123718 | 32123871 |
| 692 NA19221 | [2515685 chr16 | 16 | 32159898 | 32160377 | 480    | 2   | -1.327313 | 0.143061 | 32159453 | 32160343 | 32160346 | 32160401 |
| 693 NA19221 | [2515685 chr16 | 16 | 32203459 | 32213712 | 10254  | 18  | 0.517116  | 0.047687 | 32200681 | 32205345 | 32213463 | 32213961 |
| 694 NA19221 | [2515685 chr16 | 16 | 32479451 | 32560619 | 81169  | 86  | 0.46914   | 0.021937 | 32400448 | 32481337 | 32559391 | 32561841 |
| 695 NA19221 | [2515685 chr16 | 16 | 32606692 | 32607163 | 472    | 2   | -1.327313 | 0.143061 | 32606661 | 32606724 | 32606727 | 32607591 |
| 696 NA19221 | [2515685 chr16 | 16 | 32644445 | 32671393 | 26949  | 80  | 0.35314   | 0.02262  | 32644197 | 32644693 | 32670514 | 32672271 |
| 697 NA19221 | [2515685 chr16 | 16 | 32690003 | 32691563 | 1561   | 4   | 0.961483  | 0.10116  | 32689373 | 32690634 | 32691272 | 32691851 |
| 698 NA19221 | [2515685 chr16 | 16 | 32774701 | 32901459 | 126759 | 186 | 0.364395  | 0.014835 | 32774586 | 32774817 | 32900887 | 32902031 |
| 699 NA19221 | [2515685 chr16 | 16 | 33016481 | 33018043 | 1563   | 4   | 0.961482  | 0.101159 | 33016187 | 33016775 | 33017413 | 33018671 |
| 700 NA19221 | [2515685 chr16 | 16 | 33036656 | 33063604 | 26949  | 81  | 0.353159  | 0.02248  | 33035777 | 33037535 | 33063356 | 33063851 |
| 701 NA19221 | [2515685 chr16 | 16 | 33100875 | 33101346 | 472    | 2   | -1.327313 | 0.143061 | 33100438 | 33101312 | 33101315 | 33101371 |
| 702 NA19221 | [2515685 chr16 | 16 | 33157406 | 33157879 | 474    | 2   | -1.327313 | 0.143061 | 33156967 | 33157845 | 33157848 | 33157911 |
| 703 NA19221 | [2515685 chr16 | 16 | 33201513 | 33211121 | 9609   | 18  | 0.523326  | 0.047687 | 33197841 | 33203399 | 33210872 | 33211371 |
| 704 NA19221 | [2515685 chr16 | 16 | 33438587 | 33447535 | 8949   | 18  | 0.327594  | 0.047687 | 33438287 | 33438887 | 33447235 | 33447831 |
| 705 NA19221 | [2515685 chr16 | 16 | 33476904 | 33480065 | 3162   | 5   | 0.486975  | 0.09048  | 33476264 | 33477545 | 33479777 | 33480351 |
| 706 NA19221 | [2515685 chr16 | 16 | 33594365 | 33715627 | 121263 | 174 | 0.371171  | 0.015338 | 33594223 | 33594508 | 33715511 | 33715741 |
| 707 NA19221 | [2515685 chr16 | 16 | 33715829 | 33726028 | 10200  | 14  | 0.340495  | 0.054072 | 33715743 | 33715916 | 33725846 | 33726211 |
| 708 NA19221 | [2515685 chr16 | 16 | 33858104 | 33875398 | 17295  | 12  | 0.600985  | 0.058404 | 33852692 | 33859990 | 33873512 | 34031201 |
| 709 NA19221 | [2515685 chr16 | 16 | 34326899 | 34597593 | 270695 | 304 | -0.512538 | 0.011692 | 34326619 | 34327179 | 34597356 | 34597831 |
| 710 NA19221 | [2515685 chr16 | 16 | 34733687 | 34883143 | 149457 | 43  | 0.260311  | 0.030853 | 34733329 | 34734046 | 34882794 | 34883491 |
| 711 NA19221 | [2515685 chr16 | 16 | 57204541 | 57207585 | 3045   | 3   | 5.521824  | 0.22691  | 57204170 | 57204913 | 57206938 | 57208231 |
| 712 NA19221 | [2515685 chr16 | 16 | 70647868 | 70668660 | 20793  | 14  | 1.412955  | 0.054859 | 70647656 | 70648081 | 70668127 | 70669191 |
| 713 NA19221 | [2515685 chr16 | 16 | 74823273 | 74839125 | 15853  | 11  | -0.337558 | 0.062509 | 74822628 | 74823919 | 74837239 | 74849251 |
| 714 NA19221 | [2515685 chr16 | 16 | 76930776 | 76942282 | 11507  | 9   | 0.824921  | 0.06744  | 76930290 | 76931263 | 76941602 | 76942961 |
| 715 NA19221 | [2515685 chr16 | 16 | 84509225 | 84510619 | 1395   | 2   | 0.837352  | 0.143061 | 84508957 | 84509494 | 84510226 | 84511011 |
| 716 NA19221 | [2515685 chr16 | 16 | 84562720 | 84565235 | 2516   | 11  | 1.065041  | 0.061001 | 84561685 | 84563756 | 84565142 | 84565321 |
| 717 NA19221 | [2515685 chr16 | 16 | 85086098 | 85101480 | 15383  | 14  | 0.299673  | 0.054072 | 85085656 | 85086540 | 85100112 | 85102841 |
| 718 NA19221 | [2515685 chr16 | 16 | 86472841 | 86531247 | 58407  | 54  | 0.25298   | 0.027558 | 86472244 | 86473439 | 86530245 | 86532241 |



|             |                |    |          |          |        |     |           |          |          |          |          |          |
|-------------|----------------|----|----------|----------|--------|-----|-----------|----------|----------|----------|----------|----------|
| 719 NA19221 | [2515685 chr16 | 16 | 88166771 | 88181036 | 14266  | 18  | 0.375778  | 0.047687 | 88166300 | 88167242 | 88180612 | 88181467 |
| 720 NA19221 | [2515685 chr17 | 17 | 911980   | 915554   | 3575   | 4   | -1.062353 | 0.101158 | 911452   | 912508   | 915413   | 915696   |
| 721 NA19221 | [2515685 chr17 | 17 | 966029   | 974361   | 8333   | 26  | 0.613971  | 0.039678 | 965521   | 966537   | 974003   | 974720   |
| 722 NA19221 | [2515685 chr17 | 17 | 10979069 | 10984032 | 4964   | 2   | -0.718773 | 0.14306  | 10978582 | 10979557 | 10981825 | 11038843 |
| 723 NA19221 | [2515685 chr17 | 17 | 13982278 | 13987614 | 5337   | 5   | -0.533097 | 0.090481 | 13981856 | 13982700 | 13982718 | 13988010 |
| 724 NA19221 | [2515685 chr17 | 17 | 16658474 | 16718140 | 59667  | 106 | 0.25005   | 0.019651 | 16658180 | 16658768 | 16717750 | 16718533 |
| 725 NA19221 | [2515685 chr17 | 17 | 17122819 | 17127198 | 4380   | 5   | 0.455063  | 0.09048  | 17122336 | 17123302 | 17126001 | 17128391 |
| 726 NA19221 | [2515685 chr17 | 17 | 18062537 | 18109504 | 46968  | 56  | 0.251824  | 0.027036 | 18062199 | 18062875 | 18109118 | 18109891 |
| 727 NA19221 | [2515685 chr17 | 17 | 18965709 | 18991437 | 25729  | 56  | 0.280437  | 0.027036 | 18963537 | 18967881 | 18991216 | 18991651 |
| 728 NA19221 | [2515685 chr17 | 17 | 20393372 | 20394524 | 1153   | 3   | 0.623024  | 0.116809 | 20392689 | 20394056 | 20394472 | 20394571 |
| 729 NA19221 | [2515685 chr17 | 17 | 21310665 | 21314618 | 3954   | 5   | -0.508292 | 0.09048  | 21310379 | 21310951 | 21313122 | 21316111 |
| 730 NA19221 | [2515685 chr17 | 17 | 21355924 | 21357245 | 1322   | 2   | 0.795052  | 0.143061 | 21355507 | 21356341 | 21357020 | 21357471 |
| 731 NA19221 | [2515685 chr17 | 17 | 21415027 | 21418282 | 3256   | 2   | 0.99582   | 0.143061 | 21410935 | 21417234 | 21417641 | 21418921 |
| 732 NA19221 | [2515685 chr17 | 17 | 21748250 | 21754969 | 6720   | 6   | 0.450881  | 0.082596 | 21748059 | 21748441 | 21754015 | 21755921 |
| 733 NA19221 | [2515685 chr17 | 17 | 21826349 | 21834752 | 8404   | 7   | 1.009977  | 0.076469 | 21826238 | 21826461 | 21833710 | 21835791 |
| 734 NA19221 | [2515685 chr17 | 17 | 22433503 | 22442706 | 9204   | 11  | 0.324015  | 0.061001 | 22433338 | 22433669 | 22442594 | 22442811 |
| 735 NA19221 | [2515685 chr17 | 17 | 22996405 | 23030703 | 34299  | 50  | 0.251825  | 0.028612 | 22996146 | 22996665 | 23030218 | 23031181 |
| 736 NA19221 | [2515685 chr17 | 17 | 23101576 | 23129162 | 27587  | 39  | 0.268312  | 0.032397 | 23101223 | 23101930 | 23102849 | 23129831 |
| 737 NA19221 | [2515685 chr17 | 17 | 27412042 | 27437781 | 25740  | 19  | 0.280239  | 0.046415 | 27411281 | 27412804 | 27436507 | 27439051 |
| 738 NA19221 | [2515685 chr17 | 17 | 31430406 | 31461078 | 30673  | 51  | 0.572227  | 0.008049 | 31429658 | 31431155 | 31460534 | 31461621 |
| 739 NA19221 | [2515685 chr17 | 17 | 31505204 | 31835531 | 330328 | 454 | 0.572227  | 0.008049 | 31504585 | 31505824 | 31835215 | 31835841 |
| 740 NA19221 | [2515685 chr17 | 17 | 31865078 | 31886556 | 21479  | 64  | 0.572227  | 0.008049 | 31864350 | 31865807 | 31886086 | 31887021 |
| 741 NA19221 | [2515685 chr17 | 17 | 32829500 | 32833231 | 3732   | 5   | 1.14172   | 0.090479 | 32828825 | 32830175 | 32832670 | 32833791 |
| 742 NA19221 | [2515685 chr17 | 17 | 33354516 | 33426574 | 72059  | 169 | 0.463594  | 0.010091 | 33354273 | 33354759 | 33426393 | 33426751 |
| 743 NA19221 | [2515685 chr17 | 17 | 33529644 | 33556075 | 26432  | 74  | 0.463594  | 0.010091 | 33529449 | 33529840 | 33555830 | 33556321 |
| 744 NA19221 | [2515685 chr17 | 17 | 33564259 | 33656675 | 92417  | 131 | 0.463594  | 0.010091 | 33564244 | 33564275 | 33656626 | 33656721 |
| 745 NA19221 | [2515685 chr17 | 17 | 33874986 | 33941030 | 66045  | 77  | 0.372866  | 0.023056 | 33874273 | 33875699 | 33940766 | 33941291 |
| 746 NA19221 | [2515685 chr17 | 17 | 36532047 | 36543546 | 11500  | 4   | -0.986677 | 0.10116  | 36298167 | 36534254 | 36541737 | 36545351 |
| 747 NA19221 | [2515685 chr17 | 17 | 36675530 | 36685343 | 9814   | 10  | -0.844138 | 0.065443 | 36675011 | 36676049 | 36684647 | 36686041 |
| 748 NA19221 | [2515685 chr17 | 17 | 36732690 | 36752989 | 20300  | 20  | 0.302623  | 0.04524  | 36732374 | 36733007 | 36752682 | 36753291 |
| 749 NA19221 | [2515685 chr17 | 17 | 40865052 | 40888689 | 23638  | 25  | 0.311654  | 0.040464 | 40864626 | 40865479 | 40887428 | 40889951 |
| 750 NA19221 | [2515685 chr17 | 17 | 40945023 | 40953332 | 8310   | 8   | 0.506063  | 0.07153  | 40944314 | 40945733 | 40952822 | 40953881 |
| 751 NA19221 | [2515685 chr17 | 17 | 40958045 | 40970558 | 12514  | 15  | -0.262264 | 0.052239 | 40957582 | 40958509 | 40970202 | 40970911 |
| 752 NA19221 | [2515685 chr17 | 17 | 41006614 | 41021156 | 14543  | 17  | 0.355045  | 0.04907  | 41006215 | 41007013 | 41019623 | 41022691 |
| 753 NA19221 | [2515685 chr17 | 17 | 41779931 | 41928466 | 148536 | 139 | -0.291527 | 0.010219 | 41779457 | 41780406 | 41927265 | 41929661 |
| 754 NA19221 | [2515685 chr17 | 17 | 41997426 | 42142168 | 144743 | 128 | -0.291527 | 0.010219 | 41996952 | 41997901 | 42141946 | 42142391 |
| 755 NA19221 | [2515685 chr17 | 17 | 42480488 | 42485686 | 5199   | 8   | 0.486344  | 0.071531 | 42480148 | 42480829 | 42485309 | 42486061 |
| 756 NA19221 | [2515685 chr17 | 17 | 42975972 | 43026670 | 50699  | 75  | 0.456175  | 0.023362 | 42975162 | 42976783 | 43025568 | 43027771 |
| 757 NA19221 | [2515685 chr17 | 17 | 55368842 | 55372541 | 3700   | 5   | 0.531765  | 0.090479 | 55368278 | 55369406 | 55372325 | 55372751 |
| 758 NA19221 | [2515685 chr17 | 17 | 55434888 | 55466153 | 31266  | 49  | 0.394099  | 0.028903 | 55434445 | 55435332 | 55465915 | 55466391 |
| 759 NA19221 | [2515685 chr17 | 17 | 57652724 | 57667804 | 15081  | 18  | 0.369879  | 0.021209 | 57652052 | 57653396 | 57667259 | 57668341 |
| 760 NA19221 | [2515685 chr17 | 17 | 57679811 | 57711381 | 31571  | 59  | 0.369879  | 0.021209 | 57679509 | 57680114 | 57709844 | 57712911 |
| 761 NA19221 | [2515685 chr17 | 17 | 60304425 | 60309866 | 5442   | 12  | -0.309971 | 0.058404 | 60304132 | 60304718 | 60309366 | 60310361 |
| 762 NA19221 | [2515685 chr17 | 17 | 74991981 | 75032925 | 40945  | 97  | 0.288213  | 0.020542 | 74991853 | 74992110 | 75032723 | 75033311 |
| 763 NA19221 | [2515685 chr17 | 17 | 75252931 | 75269384 | 16454  | 23  | 0.35491   | 0.042186 | 75252336 | 75253526 | 75268421 | 75270341 |
| 764 NA19221 | [2515685 chr17 | 17 | 76779418 | 76786484 | 7067   | 8   | 0.482881  | 0.071531 | 76778846 | 76779990 | 76785735 | 76787231 |
| 765 NA19221 | [2515685 chr18 | 18 | 12062956 | 12067924 | 4969   | 9   | 0.338362  | 0.067439 | 12062482 | 12063431 | 12067565 | 12068281 |
| 766 NA19221 | [2515685 chr18 | 18 | 12408098 | 12413845 | 5748   | 6   | 0.412991  | 0.082596 | 12407586 | 12408611 | 12413164 | 12414521 |
| 767 NA19221 | [2515685 chr18 | 18 | 14130584 | 14141380 | 10797  | 16  | 0.312479  | 0.05058  | 14129951 | 14131218 | 14141054 | 14141701 |
| 768 NA19221 | [2515685 chr18 | 18 | 14246928 | 14325082 | 78155  | 24  | 0.591965  | 0.041299 | 14244529 | 14249327 | 14325045 | 14325111 |
| 769 NA19221 | [2515685 chr18 | 18 | 24076364 | 24179419 | 103056 | 2   | -0.809186 | 0.143061 | 24003903 | 24080953 | 24174830 | 24286811 |
| 770 NA19221 | [2515685 chr18 | 18 | 36514289 | 36521090 | 6802   | 6   | -1.029145 | 0.082982 | 36513759 | 36514820 | 36520512 | 36521661 |
| 771 NA19221 | [2515685 chr18 | 18 | 42745403 | 42893743 | 148341 | 25  | 0.308347  | 0.040463 | 42518691 | 42749992 | 42889154 | 43011501 |
| 772 NA19221 | [2515685 chr18 | 18 | 61873908 | 61883105 | 9198   | 10  | -0.951552 | 0.06398  | 61873334 | 61874483 | 61882738 | 61883471 |
| 773 NA19221 | [2515685 chr18 | 18 | 61917747 | 61920171 | 2425   | 4   | 3.409885  | 0.157105 | 61917522 | 61917973 | 61919646 | 61920691 |

|             |                |    |          |          |        |     |           |          |          |          |          |          |
|-------------|----------------|----|----------|----------|--------|-----|-----------|----------|----------|----------|----------|----------|
| 774 NA19221 | [2515685 chr18 | 18 | 63110008 | 63115099 | 5092   | 7   | -1.080515 | 0.078046 | 63109644 | 63110373 | 63114764 | 63115434 |
| 775 NA19221 | [2515685 chr18 | 18 | 67980224 | 68001706 | 21483  | 22  | -0.261311 | 0.04339  | 67980002 | 67980446 | 68001336 | 68002071 |
| 776 NA19221 | [2515685 chr18 | 18 | 74231104 | 74234275 | 3172   | 30  | 0.988077  | 0.036938 | 74230952 | 74231256 | 74234139 | 74234417 |
| 777 NA19221 | [2515685 chr18 | 18 | 74297715 | 74299391 | 1677   | 5   | -0.701397 | 0.09048  | 74297243 | 74298187 | 74299167 | 74299617 |
| 778 NA19221 | [2515685 chr18 | 18 | 74392800 | 74398225 | 5426   | 4   | 0.71391   | 0.101202 | 74398026 | 74394774 | 74397790 | 74398661 |
| 779 NA19221 | [2515685 chr19 | 19 | 8819     | 75797    | 66979  | 65  | 0.495932  | 0.025095 | 6284     | 11354    | 73262    | 79306    |
| 780 NA19221 | [2515685 chr19 | 19 | 310414   | 316181   | 5768   | 16  | -0.355768 | 0.05058  | 309687   | 311142   | 315964   | 316395   |
| 781 NA19221 | [2515685 chr19 | 19 | 882496   | 1268113  | 385618 | 378 | 0.263247  | 0.010406 | 844394   | 885031   | 1267487  | 1268735  |
| 782 NA19221 | [2515685 chr19 | 19 | 8705799  | 8761628  | 55830  | 93  | -0.287044 | 0.02098  | 8704912  | 8706686  | 8761174  | 8762083  |
| 783 NA19221 | [2515685 chr19 | 19 | 15084220 | 15098118 | 13899  | 23  | 0.361103  | 0.042186 | 15084007 | 15084433 | 15097709 | 15098527 |
| 784 NA19221 | [2515685 chr19 | 19 | 20023721 | 20024575 | 855    | 4   | 0.523879  | 0.10116  | 20023638 | 20023804 | 20024451 | 20024701 |
| 785 NA19221 | [2515685 chr19 | 19 | 20396068 | 20510144 | 114077 | 64  | -0.622179 | 0.026239 | 20389518 | 20398603 | 20509558 | 20510737 |
| 786 NA19221 | [2515685 chr19 | 19 | 22141079 | 22153327 | 12249  | 20  | -0.295331 | 0.046521 | 22140951 | 22141207 | 22153114 | 22153541 |
| 787 NA19221 | [2515685 chr19 | 19 | 22931042 | 22934759 | 3718   | 3   | 0.738614  | 0.142353 | 22918199 | 22933577 | 22934546 | 22934977 |
| 788 NA19221 | [2515685 chr19 | 19 | 23007896 | 23016040 | 8145   | 9   | 0.537207  | 0.068634 | 22990964 | 23010431 | 23015670 | 23016417 |
| 789 NA19221 | [2515685 chr19 | 19 | 23257205 | 23258538 | 1334   | 2   | -1.001705 | 0.143061 | 23256882 | 23257529 | 23258213 | 23258867 |
| 790 NA19221 | [2515685 chr19 | 19 | 23596342 | 23600235 | 3894   | 6   | -1.055276 | 0.087268 | 23596144 | 23596541 | 23599600 | 23600871 |
| 791 NA19221 | [2515685 chr19 | 19 | 24152399 | 24155800 | 3402   | 23  | 0.427213  | 0.042186 | 24152364 | 24152435 | 24155376 | 24156227 |
| 792 NA19221 | [2515685 chr19 | 19 | 39419234 | 39422498 | 3265   | 5   | 0.740877  | 0.09048  | 39418853 | 39419616 | 39421681 | 39423311 |
| 793 NA19221 | [2515685 chr19 | 19 | 41450179 | 41493620 | 43442  | 28  | 1.106169  | 0.038235 | 41421528 | 41452714 | 41491085 | 41497851 |
| 794 NA19221 | [2515685 chr19 | 19 | 42450465 | 42487512 | 37048  | 33  | 1.140354  | 0.03522  | 42413600 | 42453000 | 42486487 | 42488531 |
| 795 NA19221 | [2515685 chr19 | 19 | 43969468 | 43974792 | 5325   | 10  | 0.403034  | 0.063979 | 43969171 | 43969766 | 43975369 | 43975211 |
| 796 NA19221 | [2515685 chr19 | 19 | 43990671 | 43999228 | 8558   | 8   | 0.442658  | 0.071531 | 43989913 | 43991429 | 43999043 | 43999417 |
| 797 NA19221 | [2515685 chr19 | 19 | 45007737 | 45104193 | 96457  | 132 | 0.280427  | 0.01761  | 45007359 | 45008115 | 45104024 | 45104367 |
| 798 NA19221 | [2515685 chr19 | 19 | 45168563 | 45169716 | 1154   | 3   | 0.603329  | 0.116809 | 45168293 | 45168834 | 45169545 | 45169881 |
| 799 NA19221 | [2515685 chr19 | 19 | 48395988 | 48446564 | 50577  | 40  | 0.275845  | 0.032167 | 48395824 | 48396153 | 48445142 | 48447981 |
| 800 NA19221 | [2515685 chr19 | 19 | 49870227 | 49898102 | 27876  | 30  | 0.284569  | 0.036938 | 49869950 | 49870505 | 49897735 | 49898467 |
| 801 NA19221 | [2515685 chr19 | 19 | 52551830 | 52622428 | 70599  | 62  | 0.272208  | 0.025695 | 52551366 | 52552295 | 52621856 | 52623001 |
| 802 NA19221 | [2515685 chr19 | 19 | 53098479 | 53154327 | 55849  | 104 | -0.415823 | 0.019839 | 53098017 | 53098941 | 53152350 | 53156301 |
| 803 NA19221 | [2515685 chr19 | 19 | 54815632 | 54886444 | 70813  | 80  | 0.296742  | 0.02262  | 54814191 | 54817074 | 54886190 | 54886697 |
| 804 NA19221 | [2515685 chr19 | 19 | 55286514 | 55337601 | 51088  | 103 | -0.417623 | 0.019935 | 55286237 | 55286791 | 55337070 | 55338137 |
| 805 NA19221 | [2515685 chr19 | 19 | 56881796 | 56897570 | 15775  | 19  | 0.339089  | 0.046415 | 56881580 | 56882012 | 56897284 | 56897851 |
| 806 NA19221 | [2515685 chr19 | 19 | 58211794 | 58246367 | 34574  | 27  | -0.83201  | 0.038937 | 58211007 | 58212582 | 58245896 | 58246831 |
| 807 NA19221 | [2515685 chr19 | 19 | 58291595 | 58294540 | 2946   | 6   | 0.462769  | 0.082596 | 58291348 | 58291843 | 58294251 | 58294827 |
| 808 NA19221 | [2515685 chr19 | 19 | 59354682 | 59388955 | 34274  | 40  | 0.294116  | 0.032158 | 59354435 | 59354929 | 59388716 | 59389197 |
| 809 NA19221 | [2515685 chr19 | 19 | 59422281 | 59424378 | 2098   | 2   | -0.819498 | 0.143061 | 59421840 | 59422722 | 59424007 | 59424751 |
| 810 NA19221 | [2515685 chr19 | 19 | 59425624 | 59435274 | 9651   | 11  | -0.723904 | 0.061074 | 59425213 | 59426036 | 59435027 | 59435552 |
| 811 NA19221 | [2515685 chr19 | 19 | 59492384 | 59498950 | 6567   | 7   | 0.583281  | 0.076469 | 59491977 | 59492791 | 59497077 | 59500827 |
| 812 NA19221 | [2515685 chr19 | 19 | 59619978 | 59634527 | 14550  | 16  | 0.306695  | 0.05058  | 59619007 | 59620949 | 59634297 | 59634757 |
| 813 NA19221 | [2515685 chr19 | 19 | 60951550 | 60975624 | 24075  | 22  | -0.297746 | 0.043779 | 60951331 | 60951769 | 60975501 | 60975747 |
| 814 NA19221 | [2515685 chr20 | 20 | 1511097  | 1532477  | 21381  | 26  | -2.402368 | 0.053049 | 1510534  | 1511660  | 1532182  | 1532773  |
| 815 NA19221 | [2515685 chr20 | 20 | 1534463  | 1535141  | 679    | 2   | -0.972923 | 0.150001 | 1534231  | 1534696  | 1534879  | 1535404  |
| 816 NA19221 | [2515685 chr20 | 20 | 9017795  | 9022830  | 5036   | 6   | -0.464123 | 0.082596 | 9017314  | 9018276  | 9022560  | 9023101  |
| 817 NA19221 | [2515685 chr20 | 20 | 12189551 | 12216452 | 26902  | 24  | -0.254367 | 0.041516 | 12189322 | 12189781 | 12215934 | 12216977 |
| 818 NA19221 | [2515685 chr20 | 20 | 25730081 | 25747058 | 16978  | 24  | -0.331294 | 0.041406 | 25730023 | 25730139 | 25746965 | 25747157 |
| 819 NA19221 | [2515685 chr20 | 20 | 25769130 | 25771875 | 2746   | 4   | -0.624285 | 0.10116  | 25768333 | 25769927 | 25770659 | 25773097 |
| 820 NA19221 | [2515685 chr20 | 20 | 25781059 | 25799175 | 18117  | 14  | 0.364044  | 0.054071 | 25780369 | 25781750 | 25798661 | 25799681 |
| 821 NA19221 | [2515685 chr20 | 20 | 25910211 | 25927359 | 17149  | 16  | 0.254673  | 0.05058  | 25908060 | 25912362 | 25927111 | 25927601 |
| 822 NA19221 | [2515685 chr20 | 20 | 25941300 | 25944046 | 2747   | 4   | -0.624285 | 0.101159 | 25940088 | 25942512 | 25943249 | 25944847 |
| 823 NA19221 | [2515685 chr20 | 20 | 25966118 | 25983093 | 16976  | 24  | -0.331294 | 0.041406 | 25966025 | 25966211 | 25983035 | 25983157 |
| 824 NA19221 | [2515685 chr20 | 20 | 26136817 | 26138192 | 1376   | 3   | 0.753041  | 0.116808 | 26136626 | 26137008 | 26137783 | 26138607 |
| 825 NA19221 | [2515685 chr20 | 20 | 28135773 | 28149369 | 13597  | 21  | 0.405788  | 0.04415  | 28135464 | 28136082 | 28149114 | 28149627 |
| 826 NA19221 | [2515685 chr20 | 20 | 44368415 | 44394714 | 26300  | 29  | 0.256676  | 0.037569 | 44368003 | 44368828 | 44394297 | 44395137 |
| 827 NA19221 | [2515685 chr20 | 20 | 59950373 | 59957050 | 6678   | 19  | 0.582557  | 0.046415 | 59950066 | 59950681 | 59956538 | 59957567 |
| 828 NA19221 | [2515685 chr20 | 20 | 60877549 | 61702291 | 824743 | 199 | 0.252616  | 0.014367 | 60877267 | 60877832 | 61701456 | 61703127 |

|             |                |    |          |          |        |     |           |          |          |          |          |          |
|-------------|----------------|----|----------|----------|--------|-----|-----------|----------|----------|----------|----------|----------|
| 829 NA19221 | [2515685 chr20 | 20 | 62064480 | 62083335 | 18856  | 28  | 0.418711  | 0.038372 | 62064102 | 62064858 | 62082957 | 6208371: |
| 830 NA19221 | [2515685 chr20 | 20 | 62113559 | 62121334 | 7776   | 22  | -0.437492 | 0.043135 | 62113491 | 62113628 | 62120828 | 6212184: |
| 831 NA19221 | [2515685 chr20 | 20 | 62371216 | 62373725 | 2510   | 3   | 0.786426  | 0.116809 | 62370954 | 62371479 | 62373315 | 6237413: |
| 832 NA19221 | [2515685 chr21 | 21 | 9931849  | 10009151 | 77303  | 15  | -0.261491 | 0.052239 | 9915787  | 9937310  | 10008645 | 1000965: |
| 833 NA19221 | [2515685 chr21 | 21 | 10053781 | 10076005 | 22225  | 27  | 0.3531    | 0.038936 | 10053078 | 10054484 | 10075742 | 1007626: |
| 834 NA19221 | [2515685 chr21 | 21 | 13359602 | 13389858 | 30257  | 27  | -0.269483 | 0.038936 | 13359370 | 13359834 | 13389645 | 1339007: |
| 835 NA19221 | [2515685 chr21 | 21 | 13905235 | 13908071 | 2837   | 4   | -0.581614 | 0.10116  | 13904937 | 13905534 | 13907829 | 1390831: |
| 836 NA19221 | [2515685 chr21 | 21 | 14144636 | 14197493 | 52858  | 19  | 0.52529   | 0.046416 | 14144478 | 14144795 | 14194870 | 1420011: |
| 837 NA19221 | [2515685 chr21 | 21 | 19656593 | 19667753 | 11161  | 13  | -0.360106 | 0.058622 | 19656328 | 19656859 | 19667353 | 1966815: |
| 838 NA19221 | [2515685 chr21 | 21 | 20722868 | 20767282 | 44415  | 36  | -1.026772 | 0.035431 | 20721169 | 20724567 | 20766825 | 2076773: |
| 839 NA19221 | [2515685 chr21 | 21 | 46892578 | 46896566 | 3989   | 11  | 0.363791  | 0.061001 | 46892366 | 46892791 | 46896370 | 4689676: |
| 840 NA19221 | [2515685 chr22 | 22 | 14744168 | 14750754 | 6587   | 10  | 0.325907  | 0.063978 | 14742029 | 14746308 | 14750515 | 1475099: |
| 841 NA19221 | [2515685 chr22 | 22 | 15341785 | 15342435 | 651    | 5   | 0.479629  | 0.09048  | 15341688 | 15341882 | 15342308 | 1534256: |
| 842 NA19221 | [2515685 chr22 | 22 | 17266448 | 17341395 | 74948  | 77  | 0.256092  | 0.023056 | 17266211 | 17266685 | 17341155 | 1734163: |
| 843 NA19221 | [2515685 chr22 | 22 | 19392079 | 19571207 | 179129 | 10  | -0.356065 | 0.063978 | 19391751 | 19392407 | 19568526 | 1966688: |
| 844 NA19221 | [2515685 chr22 | 22 | 20082771 | 20095586 | 12816  | 15  | -0.272313 | 0.052239 | 20082396 | 20083147 | 20095331 | 2009584: |
| 845 NA19221 | [2515685 chr22 | 22 | 20111975 | 20114157 | 2183   | 6   | -0.422014 | 0.082596 | 20111758 | 20112193 | 20113865 | 2011444: |
| 846 NA19221 | [2515685 chr22 | 22 | 22258586 | 22275237 | 16652  | 18  | 0.316266  | 0.047687 | 22258243 | 22258930 | 22275086 | 2227538: |
| 847 NA19221 | [2515685 chr22 | 22 | 22667662 | 22669606 | 1945   | 4   | 0.526767  | 0.101159 | 22667642 | 22667682 | 22669060 | 2267015: |
| 848 NA19221 | [2515685 chr22 | 22 | 22670700 | 22720154 | 49455  | 52  | 1.157239  | 0.031211 | 22670152 | 22671248 | 22719882 | 2272042: |
| 849 NA19221 | [2515685 chr22 | 22 | 22721913 | 22730636 | 8724   | 12  | 0.526592  | 0.058404 | 22721893 | 22721933 | 22731011 | 2273117: |
| 850 NA19221 | [2515685 chr22 | 22 | 23338129 | 23374783 | 36655  | 29  | 0.261284  | 0.03757  | 23336990 | 23339269 | 23374403 | 2337516: |
| 851 NA19221 | [2515685 chr22 | 22 | 23926447 | 23967300 | 40854  | 39  | 0.286407  | 0.032626 | 23925331 | 23927563 | 23966978 | 2396762: |
| 852 NA19221 | [2515685 chr22 | 22 | 23984440 | 24246199 | 261760 | 261 | 0.450488  | 0.012533 | 23983689 | 23985192 | 24244654 | 2424774: |
| 853 NA19221 | [2515685 chr22 | 22 | 24279924 | 24286330 | 6407   | 8   | 0.381791  | 0.071531 | 24279539 | 24280310 | 24286052 | 2428660: |
| 854 NA19221 | [2515685 chr22 | 22 | 33619409 | 33623490 | 4082   | 5   | 0.85067   | 0.090481 | 33618939 | 33619879 | 33622642 | 3362433: |
| 855 NA19221 | [2515685 chr22 | 22 | 35267390 | 35274526 | 7137   | 8   | -0.801413 | 0.071531 | 35266789 | 35267992 | 35273635 | 3527541: |
| 856 NA19221 | [2515685 chr22 | 22 | 42943009 | 42959163 | 16155  | 4   | -0.567981 | 0.101159 | 42924410 | 42945690 | 42956482 | 4296398: |
| 857 NA19221 | [2515685 chr22 | 22 | 43455661 | 43456925 | 1265   | 2   | -0.932408 | 0.143063 | 43455369 | 43455954 | 43456505 | 4345734: |
| 1 NA10839   | [2515685 chr1  | 1  | 76985    | 77845    | 861    | 2   | 0.736445  | 0.115373 | 76641    | 77329    | 77684    | 78006    |
| 2 NA10839   | [2515685 chr1  | 1  | 435732   | 436343   | 612    | 2   | -0.558668 | 0.096185 | 435179   | 436286   | 436286   | 436401   |
| 3 NA10839   | [2515685 chr1  | 1  | 601043   | 612159   | 11117  | 8   | -1.101512 | 0.0557   | 587801   | 604315   | 610122   | 614196   |
| 4 NA10839   | [2515685 chr1  | 1  | 633837   | 634448   | 612    | 2   | -0.558667 | 0.096185 | 633780   | 633895   | 633895   | 635002   |
| 5 NA10839   | [2515685 chr1  | 1  | 884397   | 885670   | 1274   | 2   | 0.527242  | 0.093591 | 884134   | 884661   | 885145   | 886195   |
| 6 NA10839   | [2515685 chr1  | 1  | 1654216  | 1658327  | 4112   | 6   | -0.485503 | 0.056423 | 1653260  | 1655173  | 1657946  | 1658705  |
| 7 NA10839   | [2515685 chr1  | 1  | 1679092  | 1701603  | 22512  | 25  | -0.302729 | 0.021915 | 1678332  | 1679852  | 1701413  | 1701795  |
| 8 NA10839   | [2515685 chr1  | 1  | 1707487  | 1712489  | 5003   | 9   | -0.302729 | 0.021915 | 1706527  | 1708448  | 1712202  | 1712776  |
| 9 NA10839   | [2515685 chr1  | 1  | 10416438 | 10418311 | 1874   | 2   | -0.838854 | 0.10106  | 10415863 | 10417014 | 10417712 | 1041891  |
| 10 NA10839  | [2515685 chr1  | 1  | 12829971 | 12836347 | 6377   | 10  | 0.400493  | 0.046316 | 12829669 | 12830274 | 12836012 | 1283668: |
| 11 NA10839  | [2515685 chr1  | 1  | 12843376 | 12863841 | 20466  | 27  | 0.447193  | 0.026599 | 12843104 | 12843649 | 12860569 | 1286861: |
| 12 NA10839  | [2515685 chr1  | 1  | 12884329 | 12886858 | 2530   | 4   | 0.573551  | 0.060928 | 12884224 | 12884434 | 12886536 | 1288718: |
| 13 NA10839  | [2515685 chr1  | 1  | 12893626 | 12931133 | 37508  | 82  | 0.297493  | 0.01497  | 12893265 | 12893988 | 12930962 | 1293130: |
| 14 NA10839  | [2515685 chr1  | 1  | 12995178 | 13001855 | 6678   | 9   | 0.280475  | 0.049307 | 12994551 | 12995806 | 13001230 | 1300248: |
| 15 NA10839  | [2515685 chr1  | 1  | 13081882 | 13093741 | 11860  | 11  | -0.299424 | 0.043008 | 13081711 | 13082054 | 13092695 | 1309478: |
| 16 NA10839  | [2515685 chr1  | 1  | 13114053 | 13162706 | 48654  | 104 | 0.286135  | 0.01285  | 13113809 | 13114298 | 13162366 | 1316304: |
| 17 NA10839  | [2515685 chr1  | 1  | 13185381 | 13216105 | 30725  | 27  | 0.263755  | 0.02186  | 13178206 | 13188653 | 13214189 | 1321802: |
| 18 NA10839  | [2515685 chr1  | 1  | 13300967 | 13373969 | 73003  | 40  | 0.299628  | 0.019736 | 13300595 | 13301339 | 13373608 | 1337433: |
| 19 NA10839  | [2515685 chr1  | 1  | 13380737 | 13383503 | 2767   | 4   | 0.610505  | 0.056778 | 13380415 | 13381060 | 13383163 | 1338384: |
| 20 NA10839  | [2515685 chr1  | 1  | 13406236 | 13436941 | 30706  | 27  | 0.263755  | 0.02186  | 13399000 | 13409508 | 13435025 | 1343885: |
| 21 NA10839  | [2515685 chr1  | 1  | 16558905 | 16577498 | 18594  | 15  | -0.273886 | 0.034579 | 16557482 | 16560328 | 16577091 | 1657790: |
| 22 NA10839  | [2515685 chr1  | 1  | 16951179 | 16960152 | 8974   | 8   | -0.470832 | 0.052586 | 16950818 | 16951540 | 16959445 | 1696085: |
| 23 NA10839  | [2515685 chr1  | 1  | 16983252 | 17007421 | 24170  | 26  | -0.599755 | 0.030533 | 16982953 | 16983552 | 17006449 | 1700839: |
| 24 NA10839  | [2515685 chr1  | 1  | 17011526 | 17014955 | 3430   | 3   | -0.46021  | 0.090991 | 17011088 | 17011964 | 17014224 | 1701568: |
| 25 NA10839  | [2515685 chr1  | 1  | 25330950 | 25381274 | 50325  | 47  | -0.449298 | 0.016894 | 25330662 | 25331238 | 25380813 | 2538173: |
| 26 NA10839  | [2515685 chr1  | 1  | 25391148 | 25409301 | 18154  | 24  | -0.449298 | 0.016894 | 25390773 | 25391523 | 25408840 | 2540976: |

|            |               |   |           |           |        |     |           |          |           |           |           |           |
|------------|---------------|---|-----------|-----------|--------|-----|-----------|----------|-----------|-----------|-----------|-----------|
| 27 NA10839 | [2515685 chr1 | 1 | 25434181  | 25439981  | 5801   | 14  | -0.441055 | 0.039442 | 25433990  | 25434373  | 25438920  | 2544104:  |
| 28 NA10839 | [2515685 chr1 | 1 | 57265788  | 57269385  | 3598   | 3   | 0.392174  | 0.072425 | 57264976  | 57266601  | 57269038  | 5726973:  |
| 29 NA10839 | [2515685 chr1 | 1 | 72478372  | 72524180  | 45809  | 36  | -3.066863 | 0.047843 | 72478140  | 72478604  | 72523661  | 7252470:  |
| 30 NA10839 | [2515685 chr1 | 1 | 72968710  | 72970203  | 1494   | 2   | -0.727308 | 0.115661 | 72968208  | 72969212  | 72969989  | 7297041:  |
| 31 NA10839 | [2515685 chr1 | 1 | 86112825  | 86116608  | 3784   | 5   | -0.897846 | 0.073573 | 86112582  | 86113069  | 86116349  | 8611686:  |
| 32 NA10839 | [2515685 chr1 | 1 | 89188117  | 89190762  | 2646   | 4   | 1.9275    | 0.10292  | 89187764  | 89188470  | 89190458  | 8919106:  |
| 33 NA10839 | [2515685 chr1 | 1 | 94869509  | 94870854  | 1346   | 3   | 0.438138  | 0.076103 | 94869219  | 94869799  | 94870647  | 9487106:  |
| 34 NA10839 | [2515685 chr1 | 1 | 103827497 | 103834166 | 6670   | 16  | 0.724094  | 0.035539 | 103827175 | 103827820 | 103833999 | 10383433: |
| 35 NA10839 | [2515685 chr1 | 1 | 103855134 | 103866317 | 11184  | 16  | 0.859682  | 0.008414 | 103855117 | 103855151 | 103865345 | 10386729: |
| 36 NA10839 | [2515685 chr1 | 1 | 103873304 | 103933631 | 60328  | 96  | 0.859682  | 0.008414 | 103873021 | 103873587 | 103933614 | 10393364: |
| 37 NA10839 | [2515685 chr1 | 1 | 103939709 | 104015739 | 76031  | 123 | 0.859682  | 0.008414 | 103937206 | 103942212 | 104013178 | 10401830: |
| 38 NA10839 | [2515685 chr1 | 1 | 104022641 | 104029695 | 7055   | 5   | 0.436323  | 0.066137 | 104022431 | 104022851 | 104028575 | 10403081: |
| 39 NA10839 | [2515685 chr1 | 1 | 105728161 | 105735462 | 7302   | 8   | -1.011102 | 0.062858 | 105727820 | 105728503 | 105734532 | 10573639: |
| 40 NA10839 | [2515685 chr1 | 1 | 105862636 | 105864295 | 1660   | 2   | -0.632329 | 0.101334 | 105862373 | 105862900 | 105864051 | 10586454: |
| 41 NA10839 | [2515685 chr1 | 1 | 108444641 | 108449550 | 4910   | 9   | 0.761651  | 0.051322 | 108443817 | 108445466 | 108449224 | 10844987: |
| 42 NA10839 | [2515685 chr1 | 1 | 108515184 | 108549101 | 33918  | 50  | 0.358888  | 0.021077 | 108515012 | 108515357 | 108548555 | 10854964: |
| 43 NA10839 | [2515685 chr1 | 1 | 108638318 | 108688521 | 50204  | 58  | 0.34439   | 0.019613 | 108638254 | 108638383 | 108688349 | 10868869: |
| 44 NA10839 | [2515685 chr1 | 1 | 116874175 | 116915892 | 41718  | 52  | -0.253741 | 0.02004  | 116873908 | 116874442 | 116915593 | 11691619: |
| 45 NA10839 | [2515685 chr1 | 1 | 120244720 | 120342422 | 97703  | 150 | 0.284279  | 0.011627 | 120243262 | 120246178 | 120342303 | 12034254: |
| 46 NA10839 | [2515685 chr1 | 1 | 141909579 | 141981853 | 72275  | 165 | 0.273469  | 0.009902 | 141909385 | 141909774 | 141978581 | 14203010: |
| 47 NA10839 | [2515685 chr1 | 1 | 142092168 | 142099412 | 7245   | 15  | 0.322256  | 0.034157 | 142091944 | 142092393 | 142098977 | 14209984: |
| 48 NA10839 | [2515685 chr1 | 1 | 142438646 | 142569435 | 130790 | 158 | 0.3574    | 0.011156 | 142438189 | 142439104 | 142568775 | 14257009: |
| 49 NA10839 | [2515685 chr1 | 1 | 142678703 | 142777852 | 99150  | 162 | 0.263427  | 0.011404 | 142678583 | 142678823 | 142776895 | 14277880: |
| 50 NA10839 | [2515685 chr1 | 1 | 145035651 | 145115761 | 80111  | 196 | 0.26225   | 0.009167 | 145035338 | 145035964 | 145115682 | 14511584: |
| 51 NA10839 | [2515685 chr1 | 1 | 145383992 | 145400247 | 16256  | 39  | 0.317132  | 0.020021 | 145383814 | 145384171 | 145400133 | 14540036: |
| 52 NA10839 | [2515685 chr1 | 1 | 145546022 | 145562677 | 16656  | 38  | 0.322191  | 0.020345 | 145545844 | 145546201 | 145562394 | 14556296: |
| 53 NA10839 | [2515685 chr1 | 1 | 145814302 | 146399370 | 585069 | 693 | 0.253697  | 0.005212 | 145812747 | 145815857 | 146399308 | 14639943: |
| 54 NA10839 | [2515685 chr1 | 1 | 149368571 | 149385742 | 17172  | 3   | -1.006916 | 0.089933 | 149368105 | 149369038 | 149385339 | 14938614: |
| 55 NA10839 | [2515685 chr1 | 1 | 149385742 | 149399435 | 13694  | 19  | -3.044911 | 0.067083 | 149385339 | 149386145 | 149399080 | 14939979: |
| 56 NA10839 | [2515685 chr1 | 1 | 158293934 | 158377436 | 83503  | 98  | -0.600813 | 0.014821 | 158293643 | 158294226 | 158377203 | 15837767: |
| 57 NA10839 | [2515685 chr1 | 1 | 170596123 | 170598078 | 1956   | 3   | -0.452613 | 0.089988 | 170595643 | 170596603 | 170597700 | 17059845: |
| 58 NA10839 | [2515685 chr1 | 1 | 218762650 | 218771442 | 8793   | 8   | 0.488009  | 0.054094 | 218762212 | 218763089 | 218771135 | 21877175: |
| 59 NA10839 | [2515685 chr1 | 1 | 226117234 | 226125725 | 8492   | 2   | -0.869855 | 0.115927 | 226114786 | 226119683 | 226122453 | 22612975: |
| 60 NA10839 | [2515685 chr1 | 1 | 236719047 | 236720968 | 1922   | 3   | -0.808775 | 0.086579 | 236718751 | 236719344 | 236720749 | 23672118: |
| 61 NA10839 | [2515685 chr1 | 1 | 239368545 | 239498531 | 129987 | 15  | -0.343921 | 0.038248 | 239368239 | 239368851 | 239496181 | 23950088: |
| 62 NA10839 | [2515685 chr1 | 1 | 242740488 | 242745306 | 4819   | 3   | 0.421731  | 0.08434  | 242740119 | 242740857 | 242742034 | 24275035: |
| 63 NA10839 | [2515685 chr1 | 1 | 243009520 | 243011368 | 1849   | 3   | -1.513176 | 0.098552 | 243008430 | 243010610 | 243011204 | 24301153: |
| 64 NA10839 | [2515685 chr1 | 1 | 244935197 | 244936698 | 1502   | 4   | -0.518209 | 0.076125 | 244934954 | 244935441 | 244936297 | 24493710: |
| 65 NA10839 | [2515685 chr2 | 2 | 296456    | 298925    | 2470   | 8   | -0.628847 | 0.054454 | 296213    | 296699    | 298661    | 299185:   |
| 66 NA10839 | [2515685 chr2 | 2 | 388500    | 390704    | 2205   | 6   | 0.346717  | 0.05963  | 387915    | 389086    | 390173    | 391236:   |
| 67 NA10839 | [2515685 chr2 | 2 | 4722540   | 4724061   | 1522   | 2   | 0.577983  | 0.099567 | 4722151   | 4722930   | 4723456   | 4724666:  |
| 68 NA10839 | [2515685 chr2 | 2 | 35896477  | 35905932  | 9456   | 3   | -0.997765 | 0.087407 | 35879425  | 35899430  | 35902979  | 3590982:  |
| 69 NA10839 | [2515685 chr2 | 2 | 44378695  | 44380701  | 2007   | 3   | -0.837072 | 0.080021 | 44378636  | 44378754  | 44379703  | 4438169:  |
| 70 NA10839 | [2515685 chr2 | 2 | 56563624  | 56567381  | 3758   | 2   | 4.101033  | 0.235907 | 56556559  | 56566577  | 56567035  | 5656772:  |
| 71 NA10839 | [2515685 chr2 | 2 | 61675589  | 61676777  | 1189   | 2   | -0.673581 | 0.128234 | 61675200  | 61675979  | 61676468  | 6167708:  |
| 72 NA10839 | [2515685 chr2 | 2 | 75296507  | 75298934  | 2428   | 2   | 0.558169  | 0.101597 | 75296056  | 75296959  | 75298532  | 7529933:  |
| 73 NA10839 | [2515685 chr2 | 2 | 87044462  | 87063085  | 18624  | 28  | 0.314765  | 0.024364 | 87044084  | 87044841  | 87061776  | 8706439:  |
| 74 NA10839 | [2515685 chr2 | 2 | 87752025  | 87753739  | 1715   | 2   | -0.498943 | 0.097169 | 87751415  | 87752636  | 87752678  | 8775480:  |
| 75 NA10839 | [2515685 chr2 | 2 | 88117636  | 88126839  | 9204   | 15  | 0.294274  | 0.036149 | 88116083  | 88119190  | 88126458  | 8812722:  |
| 76 NA10839 | [2515685 chr2 | 2 | 94985753  | 94992428  | 6676   | 6   | -0.327357 | 0.058498 | 94984352  | 94987154  | 94989475  | 9499588:  |
| 77 NA10839 | [2515685 chr2 | 2 | 97184386  | 97189735  | 5350   | 2   | -0.885333 | 0.105268 | 97182781  | 97185992  | 97186782  | 9719672:  |
| 78 NA10839 | [2515685 chr2 | 2 | 97240986  | 97244212  | 3227   | 3   | -0.540146 | 0.09475  | 97239558  | 97242415  | 97243543  | 9724488:  |
| 79 NA10839 | [2515685 chr2 | 2 | 97613796  | 97614932  | 1137   | 2   | 1.18412   | 0.128957 | 97613553  | 97614040  | 97614467  | 9761539:  |
| 80 NA10839 | [2515685 chr2 | 2 | 106341249 | 106344320 | 3072   | 4   | -0.483083 | 0.076557 | 106340353 | 106342146 | 106344055 | 10634458: |
| 81 NA10839 | [2515685 chr2 | 2 | 108313411 | 108314875 | 1465   | 2   | 0.690749  | 0.110583 | 108312551 | 108314272 | 108314680 | 10831507: |

|             |               |   |           |           |        |     |           |          |           |           |           |          |
|-------------|---------------|---|-----------|-----------|--------|-----|-----------|----------|-----------|-----------|-----------|----------|
| 82 NA10839  | [2515685 chr2 | 2 | 111809680 | 111811642 | 1963   | 2   | -0.498948 | 0.09717  | 111808620 | 111810741 | 111810783 | 11181250 |
| 83 NA10839  | [2515685 chr2 | 2 | 112310614 | 112318942 | 8329   | 8   | 0.320791  | 0.049617 | 112309184 | 112312045 | 112318624 | 11231926 |
| 84 NA10839  | [2515685 chr2 | 2 | 123193457 | 123198547 | 5091   | 4   | -0.902455 | 0.07516  | 123193121 | 123193793 | 123198337 | 12319875 |
| 85 NA10839  | [2515685 chr2 | 2 | 126159437 | 126168349 | 8913   | 3   | -0.926631 | 0.087191 | 126158494 | 126160381 | 126168048 | 12616865 |
| 86 NA10839  | [2515685 chr2 | 2 | 153495550 | 153499409 | 3860   | 2   | 0.632108  | 0.120577 | 153484545 | 153498503 | 153498846 | 15349997 |
| 87 NA10839  | [2515685 chr2 | 2 | 180237123 | 180248038 | 10916  | 9   | -0.847808 | 0.052217 | 180235687 | 180238560 | 180247508 | 18024856 |
| 88 NA10839  | [2515685 chr2 | 2 | 208176479 | 208184457 | 7979   | 7   | 0.904736  | 0.061199 | 208176093 | 208176865 | 208183930 | 20818498 |
| 89 NA10839  | [2515685 chr2 | 2 | 232512469 | 232537143 | 24675  | 6   | -0.305895 | 0.047644 | 232511142 | 232513796 | 232534243 | 23254004 |
| 90 NA10839  | [2515685 chr2 | 2 | 242478812 | 242485092 | 6281   | 10  | 0.270098  | 0.040583 | 242478692 | 242478932 | 242484091 | 24248609 |
| 91 NA10839  | [2515685 chr2 | 2 | 242664580 | 242668683 | 4104   | 10  | 0.544532  | 0.037021 | 242664284 | 242664877 | 242668532 | 24266883 |
| 92 NA10839  | [2515685 chr3 | 3 | 204650    | 209394    | 4745   | 4   | 0.846198  | 0.074447 | 202918    | 206383    | 209009    | 209775   |
| 93 NA10839  | [2515685 chr3 | 3 | 1757211   | 1765707   | 8497   | 2   | 0.774556  | 0.11834  | 1756096   | 1758327   | 1762058   | 179730   |
| 94 NA10839  | [2515685 chr3 | 3 | 6622782   | 6629620   | 6839   | 6   | -1.006711 | 0.060717 | 6492869   | 6626431   | 6629261   | 662998   |
| 95 NA10839  | [2515685 chr3 | 3 | 68821474  | 68830847  | 9374   | 17  | -2.527844 | 0.062815 | 68818894  | 68824055  | 68830417  | 6883127  |
| 96 NA10839  | [2515685 chr3 | 3 | 75783104  | 75787390  | 4287   | 5   | -0.38067  | 0.067394 | 75782154  | 75784054  | 75787122  | 7578765  |
| 97 NA10839  | [2515685 chr3 | 3 | 76861449  | 76865410  | 3962   | 11  | 0.259893  | 0.037635 | 76860987  | 76861912  | 76864780  | 7686604  |
| 98 NA10839  | [2515685 chr3 | 3 | 98676984  | 98686633  | 9650   | 2   | -0.493743 | 0.08754  | 98564670  | 98680633  | 98684714  | 9868855  |
| 99 NA10839  | [2515685 chr3 | 3 | 105760262 | 105762355 | 2094   | 2   | -0.986481 | 0.125222 | 105759634 | 105760890 | 105761424 | 10576328 |
| 100 NA10839 | [2515685 chr3 | 3 | 131157629 | 131162914 | 5286   | 6   | 0.32938   | 0.063326 | 131157466 | 131157793 | 131162725 | 13116310 |
| 101 NA10839 | [2515685 chr3 | 3 | 152404523 | 152407236 | 2714   | 3   | -0.38929  | 0.077578 | 152403742 | 152405305 | 152406979 | 15240749 |
| 102 NA10839 | [2515685 chr3 | 3 | 156042614 | 156043843 | 1230   | 2   | -0.628474 | 0.107332 | 156042074 | 156043154 | 156043483 | 15604420 |
| 103 NA10839 | [2515685 chr3 | 3 | 163994592 | 164008330 | 13739  | 18  | 2.57576   | 0.03179  | 163993392 | 163995793 | 164008010 | 16400865 |
| 104 NA10839 | [2515685 chr3 | 3 | 164031304 | 164106273 | 74970  | 71  | 2.57576   | 0.03179  | 164027655 | 164036948 | 164106029 | 16410651 |
| 105 NA10839 | [2515685 chr3 | 3 | 164106273 | 164109483 | 3211   | 3   | 1.092043  | 0.117502 | 164106029 | 164106517 | 164108987 | 16410998 |
| 106 NA10839 | [2515685 chr3 | 3 | 164200660 | 164205886 | 5227   | 5   | -1.067793 | 0.086578 | 164200187 | 164201133 | 164204674 | 16420709 |
| 107 NA10839 | [2515685 chr3 | 3 | 191219813 | 191223326 | 3514   | 4   | -2.704782 | 0.128185 | 191219291 | 191220336 | 191222918 | 19122373 |
| 108 NA10839 | [2515685 chr3 | 3 | 192547312 | 192554331 | 7020   | 10  | 0.898681  | 0.052348 | 192546950 | 192547674 | 192554127 | 19255453 |
| 109 NA10839 | [2515685 chr3 | 3 | 194357854 | 194368035 | 10182  | 12  | 2.397909  | 0.079348 | 194357665 | 194358044 | 194367817 | 19436825 |
| 110 NA10839 | [2515685 chr3 | 3 | 196879796 | 196938361 | 58566  | 67  | -0.36729  | 0.017872 | 196879715 | 196879878 | 196937706 | 19693901 |
| 111 NA10839 | [2515685 chr3 | 3 | 196958848 | 196966359 | 7512   | 6   | -0.340196 | 0.059656 | 196956437 | 196961260 | 196966111 | 19696660 |
| 112 NA10839 | [2515685 chr3 | 3 | 196990589 | 197002965 | 12377  | 21  | 0.51034   | 0.032944 | 196990203 | 196990975 | 197002044 | 19700388 |
| 113 NA10839 | [2515685 chr3 | 3 | 198674426 | 198675470 | 1045   | 6   | -0.261408 | 0.050007 | 198674161 | 198674692 | 198674903 | 19867603 |
| 114 NA10839 | [2515685 chr3 | 3 | 199218619 | 199221999 | 3381   | 12  | -0.804069 | 0.04891  | 199218354 | 199218884 | 199220440 | 19922355 |
| 115 NA10839 | [2515685 chr3 | 3 | 199313925 | 199321063 | 7139   | 15  | 1.195607  | 0.033985 | 199313515 | 199314336 | 199320844 | 19932128 |
| 116 NA10839 | [2515685 chr4 | 4 | 245698    | 247001    | 1304   | 2   | -0.702166 | 0.115098 | 245505    | 245891    | 246778    | 247224   |
| 117 NA10839 | [2515685 chr4 | 4 | 282463    | 285246    | 2784   | 2   | 0.517491  | 0.09879  | 282212    | 282714    | 282933    | 28756    |
| 118 NA10839 | [2515685 chr4 | 4 | 8740317   | 8756949   | 16633  | 25  | 0.56314   | 0.023197 | 8740049   | 8740586   | 8756813   | 875708   |
| 119 NA10839 | [2515685 chr4 | 4 | 8998175   | 9046719   | 48545  | 87  | 1.130819  | 0.012554 | 8850774   | 9001243   | 9046129   | 904730   |
| 120 NA10839 | [2515685 chr4 | 4 | 9812346   | 9813108   | 763    | 33  | 0.762688  | 0.01962  | 9812284   | 9812408   | 9812952   | 981326   |
| 121 NA10839 | [2515685 chr4 | 4 | 49080370  | 49080998  | 629    | 3   | -0.987625 | 0.091632 | 49079937  | 49080803  | 49080923  | 4908107  |
| 122 NA10839 | [2515685 chr4 | 4 | 49400316  | 49400601  | 286    | 3   | -0.955719 | 0.087357 | 49400246  | 49400386  | 49400516  | 4940068  |
| 123 NA10839 | [2515685 chr4 | 4 | 64522941  | 64543857  | 20917  | 20  | -0.897882 | 0.038753 | 64522682  | 64523201  | 64542552  | 6454516  |
| 124 NA10839 | [2515685 chr4 | 4 | 69202095  | 69320563  | 118469 | 74  | 1.630724  | 0.024592 | 69201955  | 69202236  | 69320240  | 6932088  |
| 125 NA10839 | [2515685 chr4 | 4 | 69320563  | 69341211  | 20649  | 16  | 0.547545  | 0.018865 | 69320240  | 69320887  | 69340966  | 6934145  |
| 126 NA10839 | [2515685 chr4 | 4 | 69347741  | 69368480  | 20740  | 22  | 0.547545  | 0.018865 | 69347112  | 69348370  | 69365412  | 6938219  |
| 127 NA10839 | [2515685 chr4 | 4 | 69671789  | 69693234  | 21446  | 24  | 0.528658  | 0.017626 | 69671604  | 69671975  | 69692988  | 6969348  |
| 128 NA10839 | [2515685 chr4 | 4 | 69699752  | 69720490  | 20739  | 25  | 0.528658  | 0.017626 | 69699123  | 69700381  | 69717422  | 6973421  |
| 129 NA10839 | [2515685 chr4 | 4 | 70305831  | 70418701  | 112871 | 113 | 0.436325  | 0.014453 | 70305724  | 70305939  | 70418467  | 7041893  |
| 130 NA10839 | [2515685 chr4 | 4 | 104136241 | 104142022 | 5782   | 3   | -1.079938 | 0.106696 | 104135701 | 104136782 | 104140815 | 10414323 |
| 131 NA10839 | [2515685 chr4 | 4 | 105095360 | 105118828 | 23469  | 14  | -0.981705 | 0.043353 | 105093533 | 105097188 | 105118157 | 10511949 |
| 132 NA10839 | [2515685 chr4 | 4 | 115534208 | 115541546 | 7339   | 9   | -3.839616 | 0.120797 | 115530015 | 115537276 | 115539984 | 11554310 |
| 133 NA10839 | [2515685 chr4 | 4 | 115771027 | 115772381 | 1355   | 2   | -0.609336 | 0.117991 | 115770621 | 115771433 | 115771828 | 11577293 |
| 134 NA10839 | [2515685 chr4 | 4 | 116524394 | 116534652 | 10259  | 12  | -1.042584 | 0.046124 | 116523990 | 116524798 | 116534384 | 11653492 |
| 135 NA10839 | [2515685 chr4 | 4 | 124835704 | 124837199 | 1496   | 3   | -0.625258 | 0.087973 | 124835418 | 124835991 | 124836924 | 12483747 |
| 136 NA10839 | [2515685 chr4 | 4 | 138537751 | 138549906 | 12156  | 14  | 0.882436  | 0.045597 | 138537443 | 138538059 | 138547414 | 13855239 |

|             |               |   |           |           |        |     |           |          |           |           |           |          |
|-------------|---------------|---|-----------|-----------|--------|-----|-----------|----------|-----------|-----------|-----------|----------|
| 137 NA10839 | [2515685 chr4 | 4 | 139658000 | 139661127 | 3128   | 2   | -0.620541 | 0.116388 | 139657665 | 139658335 | 139660451 | 13966180 |
| 138 NA10839 | [2515685 chr4 | 4 | 142588136 | 142590500 | 2365   | 4   | -2.964932 | 0.133333 | 142587774 | 142588498 | 142590303 | 14259069 |
| 139 NA10839 | [2515685 chr4 | 4 | 145238696 | 145245588 | 6893   | 5   | -0.605271 | 0.072481 | 145236919 | 145240473 | 145245192 | 14524598 |
| 140 NA10839 | [2515685 chr4 | 4 | 162237272 | 162242562 | 5291   | 8   | 0.868186  | 0.055979 | 162236487 | 162238058 | 162242381 | 16224274 |
| 141 NA10839 | [2515685 chr4 | 4 | 162806038 | 162809269 | 3232   | 3   | 0.925235  | 0.084949 | 162804872 | 162807204 | 162808734 | 16280980 |
| 142 NA10839 | [2515685 chr4 | 4 | 169184442 | 169368370 | 183929 | 159 | 0.808845  | 0.01258  | 169184090 | 169184794 | 169366713 | 16937002 |
| 143 NA10839 | [2515685 chr4 | 4 | 173363594 | 173367718 | 4125   | 6   | -1.018721 | 0.065762 | 173362583 | 173364606 | 173367283 | 17336815 |
| 144 NA10839 | [2515685 chr4 | 4 | 173799832 | 173807323 | 7492   | 6   | -3.483261 | 0.146078 | 173799464 | 173800201 | 173804255 | 17381134 |
| 145 NA10839 | [2515685 chr4 | 4 | 183944886 | 183947025 | 2140   | 3   | -1.073885 | 0.086743 | 183944291 | 183945482 | 183946755 | 18394729 |
| 146 NA10839 | [2515685 chr4 | 4 | 185535274 | 185544849 | 9576   | 9   | 1.023497  | 0.053674 | 185534955 | 185535593 | 185543276 | 18554642 |
| 147 NA10839 | [2515685 chr4 | 4 | 186816951 | 186819359 | 2409   | 3   | 3.513143  | 0.188216 | 186816420 | 186817483 | 186819049 | 18681967 |
| 148 NA10839 | [2515685 chr4 | 4 | 187728494 | 187732907 | 4414   | 15  | 0.253234  | 0.038627 | 187728193 | 187728795 | 187732541 | 18773327 |
| 149 NA10839 | [2515685 chr4 | 4 | 188255523 | 188269680 | 14158  | 235 | 0.618697  | 0.008854 | 188255215 | 188255831 | 188269403 | 18826995 |
| 150 NA10839 | [2515685 chr4 | 4 | 190526800 | 190533163 | 6364   | 23  | -0.444897 | 0.031508 | 190526573 | 190527028 | 190531664 | 19053466 |
| 151 NA10839 | [2515685 chr5 | 5 | 520743    | 521684    | 942    | 5   | 0.777557  | 0.075933 | 520428    | 521059    | 521427    | 521942   |
| 152 NA10839 | [2515685 chr5 | 5 | 739222    | 854574    | 115353 | 102 | 0.356083  | 0.013845 | 738976    | 739468    | 854200    | 854948   |
| 153 NA10839 | [2515685 chr5 | 5 | 1075284   | 1079920   | 4637   | 24  | 0.753244  | 0.028622 | 1074709   | 1075859   | 1079566   | 108027!  |
| 154 NA10839 | [2515685 chr5 | 5 | 1122995   | 1126930   | 3936   | 39  | 0.391882  | 0.019556 | 1122772   | 1123219   | 1126646   | 112721!  |
| 155 NA10839 | [2515685 chr5 | 5 | 1231558   | 1233247   | 1690   | 2   | -0.949663 | 0.101417 | 1231167   | 1231949   | 1232879   | 123361!  |
| 156 NA10839 | [2515685 chr5 | 5 | 12863961  | 12873512  | 9552   | 14  | -0.972712 | 0.046533 | 12863778  | 12864144  | 12873198  | 1287382! |
| 157 NA10839 | [2515685 chr5 | 5 | 17550023  | 17552132  | 2110   | 4   | 0.486479  | 0.064308 | 17549646  | 17550401  | 17551804  | 1755246! |
| 158 NA10839 | [2515685 chr5 | 5 | 17570617  | 17643104  | 72488  | 331 | 0.61491   | 0.006771 | 17570551  | 17570684  | 17642455  | 1764375! |
| 159 NA10839 | [2515685 chr5 | 5 | 17664084  | 17667407  | 3324   | 7   | 0.601143  | 0.051332 | 17663473  | 17664695  | 17667174  | 1766764! |
| 160 NA10839 | [2515685 chr5 | 5 | 17745629  | 17750443  | 4815   | 2   | 0.676691  | 0.10473  | 17745478  | 17745780  | 17748817  | 1775207! |
| 161 NA10839 | [2515685 chr5 | 5 | 19410747  | 19412172  | 1426   | 3   | 0.764076  | 0.086656 | 19410189  | 19411305  | 19411980  | 1941236! |
| 162 NA10839 | [2515685 chr5 | 5 | 21309127  | 21426153  | 117027 | 180 | 0.287832  | 0.009828 | 21308898  | 21309357  | 21425562  | 2142674! |
| 163 NA10839 | [2515685 chr5 | 5 | 21971730  | 21975882  | 4153   | 9   | 0.390506  | 0.041569 | 21971258  | 21972202  | 21975612  | 2197615! |
| 164 NA10839 | [2515685 chr5 | 5 | 22161042  | 22166982  | 5941   | 8   | 0.305228  | 0.055783 | 22160580  | 22161504  | 22166620  | 2216734! |
| 165 NA10839 | [2515685 chr5 | 5 | 55701025  | 55705931  | 4907   | 3   | -0.654852 | 0.099571 | 55700864  | 55701186  | 55705409  | 5570645! |
| 166 NA10839 | [2515685 chr5 | 5 | 68865200  | 68885666  | 20467  | 43  | 0.443303  | 0.023274 | 68864770  | 68865630  | 68885378  | 6888595! |
| 167 NA10839 | [2515685 chr5 | 5 | 69032389  | 69186000  | 153612 | 350 | 0.353519  | 0.00643  | 69032338  | 69032440  | 69185949  | 6918605! |
| 168 NA10839 | [2515685 chr5 | 5 | 69276806  | 69296742  | 19937  | 33  | 0.32239   | 0.01999  | 69276696  | 69276916  | 69296381  | 6929710! |
| 169 NA10839 | [2515685 chr5 | 5 | 69357598  | 69415197  | 57600  | 54  | 0.337594  | 0.016346 | 69357245  | 69357951  | 69412002  | 6941946! |
| 170 NA10839 | [2515685 chr5 | 5 | 69497766  | 69504510  | 6745   | 19  | 0.350108  | 0.026288 | 69497740  | 69497792  | 69504400  | 6950462! |
| 171 NA10839 | [2515685 chr5 | 5 | 69612127  | 69744382  | 132256 | 291 | 0.353468  | 0.007068 | 69612076  | 69612178  | 69744181  | 6974458! |
| 172 NA10839 | [2515685 chr5 | 5 | 69907701  | 70061148  | 153448 | 328 | 0.344241  | 0.00661  | 69907650  | 69907752  | 70061097  | 7006120! |
| 173 NA10839 | [2515685 chr5 | 5 | 70151844  | 70161310  | 9467   | 22  | 0.347698  | 0.02438  | 70151734  | 70151954  | 70161126  | 7016149! |
| 174 NA10839 | [2515685 chr5 | 5 | 70233016  | 70290651  | 57636  | 54  | 0.344826  | 0.016343 | 70232663  | 70233369  | 70287456  | 7029491! |
| 175 NA10839 | [2515685 chr5 | 5 | 70403953  | 70426554  | 22602  | 43  | 0.461741  | 0.023149 | 70403337  | 70404569  | 70425419  | 7042768! |
| 176 NA10839 | [2515685 chr5 | 5 | 70495416  | 70504894  | 9479   | 26  | 0.342935  | 0.023206 | 70495232  | 70495600  | 70504784  | 7050500! |
| 177 NA10839 | [2515685 chr5 | 5 | 70611385  | 70684976  | 73592  | 160 | 0.342922  | 0.009526 | 70611099  | 70611672  | 70684611  | 7068534! |
| 178 NA10839 | [2515685 chr5 | 5 | 81459210  | 81466058  | 6849   | 2   | -1.54527  | 0.124924 | 81455614  | 81462405  | 81462863  | 8147028! |
| 179 NA10839 | [2515685 chr5 | 5 | 93928460  | 93931722  | 3263   | 3   | -0.547779 | 0.093236 | 93927706  | 93929215  | 93931460  | 9393198! |
| 180 NA10839 | [2515685 chr5 | 5 | 99409393  | 99419037  | 9645   | 13  | -0.641844 | 0.042384 | 99408997  | 99409789  | 99418328  | 9941974! |
| 181 NA10839 | [2515685 chr5 | 5 | 103531112 | 103532090 | 979    | 2   | -0.676791 | 0.122219 | 103530858 | 103531366 | 103531820 | 10353236 |
| 182 NA10839 | [2515685 chr5 | 5 | 137835178 | 137844134 | 8957   | 8   | 0.666988  | 0.058234 | 137834745 | 137835611 | 137843310 | 13784495 |
| 183 NA10839 | [2515685 chr5 | 5 | 140203081 | 140217091 | 14011  | 18  | 2.575551  | 0.062862 | 140202344 | 140203819 | 140216552 | 14021763 |
| 184 NA10839 | [2515685 chr5 | 5 | 140217091 | 140218928 | 1838   | 2   | 1.181651  | 0.120708 | 140216552 | 140217631 | 140218508 | 14021934 |
| 185 NA10839 | [2515685 chr5 | 5 | 140534849 | 140540106 | 5258   | 5   | 0.810103  | 0.069386 | 140534700 | 140534999 | 140539007 | 14054120 |
| 186 NA10839 | [2515685 chr5 | 5 | 180108385 | 180119118 | 10734  | 8   | 0.467106  | 0.054256 | 180108099 | 180108671 | 180115923 | 18013530 |
| 187 NA10839 | [2515685 chr5 | 5 | 180309823 | 180363417 | 53595  | 51  | -1.115992 | 0.026757 | 180309690 | 180309956 | 180363120 | 18036371 |
| 188 NA10839 | [2515685 chr5 | 5 | 180755027 | 180755638 | 612    | 2   | -0.558667 | 0.096185 | 180754474 | 180755581 | 180755581 | 18075569 |
| 189 NA10839 | [2515685 chr6 | 6 | 23809     | 24421     | 613    | 2   | -0.558667 | 0.096185 | 23752     | 23867     | 23867     | 24975    |
| 190 NA10839 | [2515685 chr6 | 6 | 201823    | 240929    | 39107  | 28  | -0.457901 | 0.02827  | 201415    | 202232    | 240278    | 241581   |
| 191 NA10839 | [2515685 chr6 | 6 | 29958572  | 30010672  | 52101  | 49  | 0.597351  | 0.022544 | 29957670  | 29959474  | 30010262  | 3001108! |

|             |               |   |           |           |        |     |           |          |           |           |           |           |
|-------------|---------------|---|-----------|-----------|--------|-----|-----------|----------|-----------|-----------|-----------|-----------|
| 192 NA10839 | [2515685 chr6 | 6 | 30056843  | 30060464  | 3622   | 4   | 0.414755  | 0.066871 | 30056579  | 30057108  | 30060118  | 30060811  |
| 193 NA10839 | [2515685 chr6 | 6 | 31158178  | 31160444  | 2267   | 3   | 0.539024  | 0.092671 | 31157997  | 31158360  | 31160125  | 3116076:  |
| 194 NA10839 | [2515685 chr6 | 6 | 31344330  | 31346265  | 1936   | 4   | -0.807544 | 0.072773 | 31344063  | 31344598  | 31345931  | 3134659:  |
| 195 NA10839 | [2515685 chr6 | 6 | 31387065  | 31419859  | 32795  | 16  | -0.812808 | 0.039552 | 31386395  | 31387736  | 31418034  | 3142168:  |
| 196 NA10839 | [2515685 chr6 | 6 | 32553055  | 32556275  | 3221   | 2   | 0.876567  | 0.100857 | 32550690  | 32555421  | 32556081  | 3255647:  |
| 197 NA10839 | [2515685 chr6 | 6 | 32557126  | 32702716  | 145591 | 129 | 0.604767  | 0.012239 | 32556948  | 32557305  | 32702285  | 3270314:  |
| 198 NA10839 | [2515685 chr6 | 6 | 32709934  | 32762917  | 52984  | 50  | 0.604767  | 0.012239 | 32709414  | 32710454  | 32762733  | 3276310:  |
| 199 NA10839 | [2515685 chr6 | 6 | 35862833  | 35874426  | 11594  | 13  | 0.871993  | 0.04223  | 35862530  | 35863136  | 35873957  | 3587489:  |
| 200 NA10839 | [2515685 chr6 | 6 | 54036900  | 54042384  | 5485   | 5   | 3.839017  | 0.171736 | 54036573  | 54037227  | 54041771  | 5404299:  |
| 201 NA10839 | [2515685 chr6 | 6 | 79023318  | 79093263  | 69946  | 70  | 0.812511  | 0.019196 | 79022028  | 79024609  | 79091909  | 7909461:  |
| 202 NA10839 | [2515685 chr6 | 6 | 95345535  | 95349338  | 3804   | 5   | -0.938089 | 0.075946 | 95345072  | 95345998  | 95348106  | 9535057:  |
| 203 NA10839 | [2515685 chr6 | 6 | 102041093 | 102046055 | 4963   | 6   | -1.092167 | 0.071773 | 102040642 | 102041544 | 102045198 | 10204691: |
| 204 NA10839 | [2515685 chr6 | 6 | 103844685 | 103871201 | 26517  | 17  | 2.571326  | 0.0776   | 103844347 | 103845023 | 103868241 | 10387416: |
| 205 NA10839 | [2515685 chr6 | 6 | 115492959 | 115494541 | 1583   | 2   | 0.733228  | 0.126912 | 115492678 | 115493240 | 115494140 | 11549494: |
| 206 NA10839 | [2515685 chr6 | 6 | 120671191 | 120671916 | 726    | 2   | 1.493094  | 0.121233 | 120670696 | 120671686 | 120671725 | 12067210: |
| 207 NA10839 | [2515685 chr6 | 6 | 132044718 | 132076818 | 32101  | 8   | -0.296347 | 0.045855 | 131958865 | 132048222 | 132076464 | 13207717: |
| 208 NA10839 | [2515685 chr6 | 6 | 160056728 | 160058998 | 2271   | 2   | -0.967005 | 0.089436 | 16005808  | 160057648 | 160058322 | 16005967: |
| 209 NA10839 | [2515685 chr6 | 6 | 160997684 | 161038819 | 41136  | 68  | 0.431899  | 0.014307 | 160997465 | 160997903 | 161038605 | 16103903: |
| 210 NA10839 | [2515685 chr6 | 6 | 162893670 | 162896314 | 2645   | 3   | -0.555235 | 0.084111 | 162893373 | 162893968 | 162895355 | 16289727: |
| 211 NA10839 | [2515685 chr6 | 6 | 167769371 | 167776315 | 6945   | 15  | 0.263251  | 0.038019 | 167768857 | 167769886 | 167776063 | 16777656: |
| 212 NA10839 | [2515685 chr6 | 6 | 168535543 | 168537360 | 1818   | 12  | 0.38468   | 0.032066 | 168535263 | 168535824 | 168537100 | 16853762: |
| 213 NA10839 | [2515685 chr6 | 6 | 168780035 | 168781989 | 1955   | 4   | -0.504964 | 0.072936 | 168779504 | 168780567 | 168781555 | 16878242: |
| 214 NA10839 | [2515685 chr6 | 6 | 170603879 | 170604666 | 788    | 2   | -2.60945  | 0.142903 | 170603541 | 170604217 | 170604339 | 17060499: |
| 215 NA10839 | [2515685 chr6 | 6 | 170625506 | 170627028 | 1523   | 3   | 2.26191   | 0.132947 | 170625015 | 170625997 | 170626579 | 17062747: |
| 216 NA10839 | [2515685 chr6 | 6 | 170897669 | 170898280 | 612    | 2   | -0.558668 | 0.096185 | 170897116 | 170898223 | 170898333 | 17089833: |
| 217 NA10839 | [2515685 chr7 | 7 | 124776    | 129596    | 4821   | 10  | 0.2799    | 0.041884 | 124152    | 125400    | 129140    | 130052    |
| 218 NA10839 | [2515685 chr7 | 7 | 134700    | 165233    | 30534  | 32  | 0.428538  | 0.026186 | 134442    | 134958    | 164718    | 165745    |
| 219 NA10839 | [2515685 chr7 | 7 | 1084125   | 1088166   | 4042   | 16  | 0.697555  | 0.036755 | 1083752   | 1084499   | 1087449   | 108888:   |
| 220 NA10839 | [2515685 chr7 | 7 | 3384111   | 3392460   | 8350   | 8   | 0.876122  | 0.057159 | 3383451   | 3384772   | 3390107   | 339561:   |
| 221 NA10839 | [2515685 chr7 | 7 | 5654917   | 5661199   | 6283   | 8   | -0.536665 | 0.056943 | 5654537   | 5655298   | 5660642   | 566175:   |
| 222 NA10839 | [2515685 chr7 | 7 | 19321796  | 19323120  | 1325   | 2   | 0.577532  | 0.100065 | 19321444  | 19322149  | 19322843  | 1932339:  |
| 223 NA10839 | [2515685 chr7 | 7 | 19395816  | 19403728  | 7913   | 3   | -0.658391 | 0.095944 | 19393767  | 19397866  | 19401375  | 1945566:  |
| 224 NA10839 | [2515685 chr7 | 7 | 61638389  | 62139501  | 501113 | 482 | 0.349429  | 0.006718 | 61474843  | 61640742  | 62139439  | 6213956:  |
| 225 NA10839 | [2515685 chr7 | 7 | 64029672  | 64045487  | 15816  | 45  | -0.322823 | 0.021124 | 64029291  | 64030053  | 64045069  | 6404590:  |
| 226 NA10839 | [2515685 chr7 | 7 | 64162316  | 64165371  | 3056   | 2   | 0.913975  | 0.138124 | 64160143  | 64164489  | 64165089  | 6416565:  |
| 227 NA10839 | [2515685 chr7 | 7 | 64464087  | 64476893  | 12807  | 34  | -0.299063 | 0.0243   | 64463669  | 64464506  | 64476710  | 6447707:  |
| 228 NA10839 | [2515685 chr7 | 7 | 64543857  | 64556662  | 12806  | 36  | -0.299582 | 0.023083 | 64543674  | 64544040  | 64556244  | 6455708:  |
| 229 NA10839 | [2515685 chr7 | 7 | 73698894  | 73700080  | 1187   | 3   | 0.489262  | 0.083517 | 73698686  | 73699103  | 73699523  | 7370063:  |
| 230 NA10839 | [2515685 chr7 | 7 | 73965656  | 73966691  | 1036   | 4   | 0.515891  | 0.071771 | 73965279  | 73966033  | 73966513  | 7396687:  |
| 231 NA10839 | [2515685 chr7 | 7 | 75790452  | 75794984  | 4533   | 5   | -0.642199 | 0.070952 | 75790248  | 75790656  | 75794325  | 7579564:  |
| 232 NA10839 | [2515685 chr7 | 7 | 76173835  | 76175647  | 1813   | 2   | 0.691337  | 0.101188 | 76173564  | 76174106  | 76174852  | 7617644:  |
| 233 NA10839 | [2515685 chr7 | 7 | 89455106  | 89456632  | 1527   | 3   | 2.905716  | 0.136737 | 89454839  | 89455373  | 89456225  | 8945703:  |
| 234 NA10839 | [2515685 chr7 | 7 | 99979381  | 99988465  | 9085   | 2   | -0.917299 | 0.09717  | 99885388  | 99981734  | 99986334  | 9999059:  |
| 235 NA10839 | [2515685 chr7 | 7 | 100177861 | 100181973 | 4113   | 2   | -0.529557 | 0.087579 | 100177385 | 100178338 | 100180328 | 10018361: |
| 236 NA10839 | [2515685 chr7 | 7 | 109034781 | 109048749 | 13969  | 10  | 2.663582  | 0.079282 | 109024063 | 109037134 | 109046953 | 10905054: |
| 237 NA10839 | [2515685 chr7 | 7 | 110659870 | 110661626 | 1757   | 2   | -1.03705  | 0.129931 | 110659025 | 110660715 | 110661142 | 11066211: |
| 238 NA10839 | [2515685 chr7 | 7 | 125639507 | 125644775 | 5269   | 6   | -0.868353 | 0.074104 | 125639054 | 125639961 | 125644046 | 12564550: |
| 239 NA10839 | [2515685 chr7 | 7 | 141962017 | 141978673 | 16657  | 22  | -0.396726 | 0.03249  | 141961693 | 141962342 | 141978355 | 14197899: |
| 240 NA10839 | [2515685 chr7 | 7 | 142882680 | 142892121 | 9442   | 10  | -0.25154  | 0.044997 | 142882220 | 142883140 | 142891792 | 14289245: |
| 241 NA10839 | [2515685 chr7 | 7 | 143252723 | 143259025 | 1753   | 2   | -0.650185 | 0.114079 | 143256987 | 143257560 | 143258671 | 14325938: |
| 242 NA10839 | [2515685 chr7 | 7 | 143318520 | 143417155 | 98636  | 175 | -0.412415 | 0.007321 | 143318192 | 143318849 | 143416975 | 14341733: |
| 243 NA10839 | [2515685 chr7 | 7 | 143421336 | 143511719 | 90384  | 182 | -0.412415 | 0.007321 | 143421165 | 143421507 | 143511270 | 14351216: |
| 244 NA10839 | [2515685 chr7 | 7 | 152500543 | 152502804 | 2262   | 2   | 0.645956  | 0.112606 | 152499072 | 152502014 | 152502453 | 15250315: |
| 245 NA10839 | [2515685 chr7 | 7 | 158617060 | 158624381 | 7322   | 6   | 0.807591  | 0.068249 | 158616763 | 158617357 | 158622028 | 15862673: |
| 246 NA10839 | [2515685 chr8 | 8 | 76554     | 77165     | 612    | 2   | -0.558667 | 0.096185 | 76497     | 76612     | 76612     | 77719     |

|             |                |    |           |           |        |     |           |          |           |           |           |           |
|-------------|----------------|----|-----------|-----------|--------|-----|-----------|----------|-----------|-----------|-----------|-----------|
| 247 NA10839 | [2515685 chr8  | 8  | 1328256   | 1343509   | 15254  | 45  | -0.517816 | 0.01968  | 1327688   | 1328824   | 1342795   | 1344224   |
| 248 NA10839 | [2515685 chr8  | 8  | 2202770   | 2203520   | 751    | 3   | -0.528053 | 0.07163  | 2202506   | 2203034   | 2203382   | 2203659   |
| 249 NA10839 | [2515685 chr8  | 8  | 2238733   | 2253794   | 15062  | 10  | 0.795252  | 0.051556 | 2233839   | 2241488   | 2251039   | 2257526   |
| 250 NA10839 | [2515685 chr8  | 8  | 3773583   | 3778609   | 5027   | 7   | -0.971325 | 0.061439 | 3773236   | 3773931   | 3778103   | 3779111   |
| 251 NA10839 | [2515685 chr8  | 8  | 3977734   | 3991167   | 13434  | 16  | -0.315864 | 0.037728 | 3976965   | 3978503   | 3990895   | 3991440   |
| 252 NA10839 | [2515685 chr8  | 8  | 4815064   | 4821127   | 6064   | 7   | -0.303182 | 0.060095 | 4814672   | 4815456   | 4820670   | 4821584   |
| 253 NA10839 | [2515685 chr8  | 8  | 5582875   | 5594011   | 11137  | 9   | 0.997703  | 0.049981 | 5582615   | 5583135   | 5592820   | 5595203   |
| 254 NA10839 | [2515685 chr8  | 8  | 6785456   | 6788538   | 3083   | 4   | 0.355305  | 0.068151 | 6784906   | 6786007   | 6787993   | 6789083   |
| 255 NA10839 | [2515685 chr8  | 8  | 7098713   | 7146048   | 47336  | 202 | -0.404628 | 0.008531 | 7098285   | 7099142   | 7145836   | 7146267   |
| 256 NA10839 | [2515685 chr8  | 8  | 7176337   | 7187950   | 11614  | 33  | 0.98149   | 0.027496 | 7176045   | 7176630   | 7187698   | 7188202   |
| 257 NA10839 | [2515685 chr8  | 8  | 7390737   | 7430731   | 39995  | 165 | -0.320832 | 0.005182 | 7390413   | 7391061   | 7430300   | 7431162   |
| 258 NA10839 | [2515685 chr8  | 8  | 7607253   | 7670167   | 62915  | 279 | -0.320832 | 0.005182 | 7606824   | 7607682   | 7669844   | 7670490   |
| 259 NA10839 | [2515685 chr8  | 8  | 7862281   | 7873897   | 11617  | 34  | 0.992277  | 0.026418 | 7862030   | 7862533   | 7873605   | 7874190   |
| 260 NA10839 | [2515685 chr8  | 8  | 7903980   | 7928723   | 24744  | 96  | -0.38794  | 0.012484 | 7903568   | 7904392   | 7928292   | 7929154   |
| 261 NA10839 | [2515685 chr8  | 8  | 9092622   | 9100173   | 7552   | 8   | -0.978445 | 0.059818 | 9092364   | 9092880   | 9099488   | 9100858   |
| 262 NA10839 | [2515685 chr8  | 8  | 12023134  | 12034819  | 11686  | 32  | 1.0274    | 0.028477 | 12022997  | 12023272  | 12034665  | 12034972  |
| 263 NA10839 | [2515685 chr8  | 8  | 12064826  | 12072090  | 7265   | 24  | -0.381347 | 0.025383 | 12064663  | 12064989  | 12071913  | 12072262  |
| 264 NA10839 | [2515685 chr8  | 8  | 12276602  | 12284041  | 7440   | 14  | 0.899144  | 0.038928 | 12276206  | 12276998  | 12283622  | 12284462  |
| 265 NA10839 | [2515685 chr8  | 8  | 12314107  | 12321305  | 7199   | 21  | -0.352268 | 0.026678 | 12313944  | 12314270  | 12321063  | 12321544  |
| 266 NA10839 | [2515685 chr8  | 8  | 15279899  | 15283012  | 3114   | 4   | -0.394082 | 0.074833 | 15279645  | 15280154  | 15282254  | 15283770  |
| 267 NA10839 | [2515685 chr8  | 8  | 18900549  | 18901909  | 1361   | 2   | -0.785725 | 0.102708 | 18900138  | 18900960  | 18901577  | 18902242  |
| 268 NA10839 | [2515685 chr8  | 8  | 21832667  | 21833967  | 1301   | 2   | 0.521975  | 0.097077 | 21832108  | 21833227  | 21833678  | 21834252  |
| 269 NA10839 | [2515685 chr8  | 8  | 25028407  | 25046917  | 18511  | 15  | -3.480777 | 0.074549 | 25027885  | 25028930  | 25046777  | 25047052  |
| 270 NA10839 | [2515685 chr8  | 8  | 25048594  | 25050100  | 1507   | 2   | -0.570174 | 0.089357 | 25047579  | 25049609  | 25049634  | 25050562  |
| 271 NA10839 | [2515685 chr8  | 8  | 39352204  | 39506673  | 154470 | 161 | -1.984623 | 0.020244 | 39351913  | 39352495  | 39505284  | 39508062  |
| 272 NA10839 | [2515685 chr8  | 8  | 47642283  | 47661489  | 19207  | 36  | 0.381201  | 0.025445 | 47637780  | 47645038  | 47658734  | 47688112  |
| 273 NA10839 | [2515685 chr8  | 8  | 58278355  | 58289214  | 10860  | 9   | 1.056598  | 0.044895 | 58277116  | 58279595  | 58288084  | 58290342  |
| 274 NA10839 | [2515685 chr8  | 8  | 58290538  | 58298767  | 8230   | 8   | 0.332087  | 0.051309 | 58290345  | 58290731  | 58296544  | 58300992  |
| 275 NA10839 | [2515685 chr8  | 8  | 85423649  | 85431920  | 8272   | 7   | 0.900704  | 0.059228 | 85423043  | 85424256  | 85431347  | 85432492  |
| 276 NA10839 | [2515685 chr8  | 8  | 86742169  | 86911038  | 168870 | 106 | 0.426633  | 0.011947 | 86741757  | 86742581  | 86910509  | 86911562  |
| 277 NA10839 | [2515685 chr8  | 8  | 93706038  | 93707067  | 1030   | 2   | -0.6033   | 0.102099 | 93705785  | 93706292  | 93706752  | 93707382  |
| 278 NA10839 | [2515685 chr8  | 8  | 120222659 | 120229952 | 7294   | 6   | 0.754785  | 0.06352  | 120218251 | 120225414 | 120229434 | 120230472 |
| 279 NA10839 | [2515685 chr9  | 9  | 6694419   | 6699868   | 5450   | 5   | -0.863924 | 0.067611 | 6694011   | 6694828   | 6698343   | 6701394   |
| 280 NA10839 | [2515685 chr9  | 9  | 21193770  | 21196545  | 2776   | 3   | 0.426204  | 0.079222 | 21193588  | 21193952  | 21196245  | 21196844  |
| 281 NA10839 | [2515685 chr9  | 9  | 38856017  | 38858939  | 2923   | 3   | -0.684871 | 0.102529 | 38849975  | 38858379  | 38858769  | 38859110  |
| 282 NA10839 | [2515685 chr9  | 9  | 38859688  | 38864486  | 4799   | 11  | -0.653658 | 0.043392 | 38859448  | 38859929  | 38864433  | 38864532  |
| 283 NA10839 | [2515685 chr9  | 9  | 41234952  | 41239641  | 4690   | 9   | -0.647485 | 0.049191 | 41234900  | 41235005  | 41239288  | 41239992  |
| 284 NA10839 | [2515685 chr9  | 9  | 42070573  | 42079321  | 8749   | 14  | 0.277115  | 0.031639 | 42069073  | 42072074  | 42078891  | 42079752  |
| 285 NA10839 | [2515685 chr9  | 9  | 43021458  | 43021779  | 322    | 2   | 0.659071  | 0.093141 | 43021390  | 43021526  | 43021698  | 43021862  |
| 286 NA10839 | [2515685 chr9  | 9  | 43965874  | 44064418  | 98545  | 21  | -0.258743 | 0.02767  | 43961965  | 43968236  | 44064295  | 44064542  |
| 287 NA10839 | [2515685 chr9  | 9  | 44679085  | 44682053  | 2969   | 6   | 0.318807  | 0.056872 | 44678768  | 44679402  | 44681477  | 44682622  |
| 288 NA10839 | [2515685 chr9  | 9  | 44927718  | 44931216  | 3499   | 7   | 0.306207  | 0.055406 | 44927142  | 44928294  | 44931007  | 44931422  |
| 289 NA10839 | [2515685 chr9  | 9  | 66047392  | 66052737  | 5346   | 11  | -0.645701 | 0.045396 | 66047340  | 66047445  | 66052707  | 66052762  |
| 290 NA10839 | [2515685 chr9  | 9  | 67236470  | 67238993  | 2524   | 2   | -0.502635 | 0.098569 | 67236325  | 67236615  | 67236631  | 67241462  |
| 291 NA10839 | [2515685 chr9  | 9  | 69247738  | 69257511  | 9774   | 8   | 0.252733  | 0.048527 | 69247278  | 69248198  | 69257378  | 69257642  |
| 292 NA10839 | [2515685 chr9  | 9  | 76777070  | 76779384  | 2315   | 2   | 0.647893  | 0.124507 | 76776756  | 76777385  | 76778920  | 76779844  |
| 293 NA10839 | [2515685 chr9  | 9  | 87615991  | 87618356  | 2366   | 3   | 0.626196  | 0.087883 | 87615588  | 87616394  | 87617958  | 87618752  |
| 294 NA10839 | [2515685 chr9  | 9  | 101795950 | 101804576 | 8627   | 7   | -0.843454 | 0.063889 | 101795517 | 101796383 | 101803113 | 101806032 |
| 295 NA10839 | [2515685 chr9  | 9  | 103859925 | 103866763 | 6839   | 8   | -0.975525 | 0.050526 | 103859589 | 103860261 | 103866491 | 103867032 |
| 296 NA10839 | [2515685 chr9  | 9  | 116637147 | 116703737 | 66591  | 2   | -0.467524 | 0.08572  | 116633778 | 116639509 | 116701375 | 116806722 |
| 297 NA10839 | [2515685 chr9  | 9  | 135438419 | 135444067 | 5649   | 2   | 4.385465  | 0.206361 | 135383632 | 135440781 | 135443016 | 135445112 |
| 298 NA10839 | [2515685 chr9  | 9  | 138188003 | 138189923 | 1921   | 45  | 0.319477  | 0.020603 | 138187808 | 138188198 | 138189840 | 138190002 |
| 299 NA10839 | [2515685 chr10 | 10 | 6693908   | 6704321   | 10414  | 9   | 0.819273  | 0.054382 | 6692231   | 6695585   | 6704008   | 6704634   |
| 300 NA10839 | [2515685 chr10 | 10 | 13097712  | 13101052  | 3341   | 6   | -0.769072 | 0.067134 | 13097235  | 13098190  | 13100598  | 13101501  |
| 301 NA10839 | [2515685 chr10 | 10 | 19788068  | 19791314  | 3247   | 4   | -0.393907 | 0.067427 | 19787726  | 19788411  | 19790970  | 19791652  |



|             |                |    |           |           |        |     |           |          |           |           |           |           |
|-------------|----------------|----|-----------|-----------|--------|-----|-----------|----------|-----------|-----------|-----------|-----------|
| 302 NA10839 | [2515685 chr10 | 10 | 20036833  | 20038315  | 1483   | 2   | -0.838138 | 0.114782 | 20036464  | 20037202  | 20038007  | 2003862-  |
| 303 NA10839 | [2515685 chr10 | 10 | 37346674  | 37348277  | 1604   | 2   | -0.726634 | 0.103029 | 37346229  | 37347120  | 37347878  | 37348671  |
| 304 NA10839 | [2515685 chr10 | 10 | 37487278  | 37529195  | 41918  | 64  | -0.437582 | 0.015457 | 37486985  | 37487572  | 37528890  | 37529501  |
| 305 NA10839 | [2515685 chr10 | 10 | 46110964  | 46130305  | 19342  | 32  | -0.383773 | 0.0219   | 46110327  | 46111602  | 46129754  | 46130851  |
| 306 NA10839 | [2515685 chr10 | 10 | 46168755  | 46170845  | 2091   | 9   | -0.518446 | 0.046432 | 46168488  | 46169022  | 46170704  | 46170981  |
| 307 NA10839 | [2515685 chr10 | 10 | 46175361  | 46179274  | 3914   | 13  | -0.358417 | 0.035735 | 46175199  | 46175523  | 46170889  | 46179651  |
| 308 NA10839 | [2515685 chr10 | 10 | 46185144  | 46570339  | 385196 | 571 | -0.322348 | 0.003464 | 46184361  | 46185928  | 46569428  | 46571251  |
| 309 NA10839 | [2515685 chr10 | 10 | 46573472  | 46600786  | 27315  | 79  | -0.322348 | 0.003464 | 46573197  | 46573748  | 46600776  | 46600791  |
| 310 NA10839 | [2515685 chr10 | 10 | 46610029  | 46641482  | 31454  | 91  | -0.322348 | 0.003464 | 46609739  | 46610319  | 46640773  | 46642191  |
| 311 NA10839 | [2515685 chr10 | 10 | 46645411  | 46675076  | 29666  | 107 | -0.322348 | 0.003464 | 46645296  | 46645526  | 46675054  | 46675091  |
| 312 NA10839 | [2515685 chr10 | 10 | 46677788  | 46692930  | 15143  | 28  | -0.322348 | 0.003464 | 46677220  | 46678357  | 46692853  | 46693001  |
| 313 NA10839 | [2515685 chr10 | 10 | 46694779  | 47105232  | 410454 | 411 | -0.322348 | 0.003464 | 46694774  | 46694784  | 47104968  | 47105491  |
| 314 NA10839 | [2515685 chr10 | 10 | 47112204  | 47173707  | 61504  | 93  | -0.322348 | 0.003464 | 47112009  | 47112400  | 47173507  | 47173901  |
| 315 NA10839 | [2515685 chr10 | 10 | 47220005  | 47220637  | 633    | 4   | -0.55155  | 0.072782 | 47219903  | 47220107  | 47220533  | 47220741  |
| 316 NA10839 | [2515685 chr10 | 10 | 47227413  | 47227763  | 351    | 2   | -0.662529 | 0.093082 | 47227267  | 47227560  | 47227636  | 47227891  |
| 317 NA10839 | [2515685 chr10 | 10 | 47230731  | 47231502  | 772    | 2   | -0.669073 | 0.08432  | 47230574  | 47230889  | 47231201  | 47231801  |
| 318 NA10839 | [2515685 chr10 | 10 | 47723236  | 47758287  | 35052  | 106 | -0.411695 | 0.012633 | 47575187  | 47725982  | 47758256  | 47758311  |
| 319 NA10839 | [2515685 chr10 | 10 | 47767237  | 47772343  | 5107   | 20  | -0.360444 | 0.029355 | 47766982  | 47767493  | 47772001  | 47772681  |
| 320 NA10839 | [2515685 chr10 | 10 | 47781268  | 47785178  | 3911   | 5   | -0.519305 | 0.069161 | 47778091  | 47784014  | 47784896  | 47785461  |
| 321 NA10839 | [2515685 chr10 | 10 | 47786472  | 47790566  | 4095   | 12  | -0.39935  | 0.035833 | 47786413  | 47786532  | 47790187  | 47790941  |
| 322 NA10839 | [2515685 chr10 | 10 | 47796397  | 47803532  | 7136   | 23  | -0.408409 | 0.028274 | 47796072  | 47796723  | 47802824  | 47804241  |
| 323 NA10839 | [2515685 chr10 | 10 | 47810436  | 47813260  | 2825   | 11  | -0.370262 | 0.039531 | 47810303  | 47810570  | 47813101  | 47813411  |
| 324 NA10839 | [2515685 chr10 | 10 | 47817871  | 47820294  | 2424   | 8   | -0.448553 | 0.052642 | 47817785  | 47817958  | 47820036  | 47820551  |
| 325 NA10839 | [2515685 chr10 | 10 | 47885738  | 47886088  | 351    | 2   | -0.662529 | 0.093082 | 47885592  | 47885885  | 47885961  | 47886211  |
| 326 NA10839 | [2515685 chr10 | 10 | 47889059  | 47889830  | 772    | 2   | -0.669073 | 0.08432  | 47888902  | 47889217  | 47889529  | 47890131  |
| 327 NA10839 | [2515685 chr10 | 10 | 48499011  | 48516837  | 17827  | 28  | -0.378062 | 0.023082 | 48498672  | 48499351  | 48516285  | 48517391  |
| 328 NA10839 | [2515685 chr10 | 10 | 48558524  | 48560613  | 2090   | 10  | -0.463728 | 0.044161 | 48558257  | 48558791  | 48560472  | 48560751  |
| 329 NA10839 | [2515685 chr10 | 10 | 48565128  | 48569551  | 4424   | 16  | -0.343356 | 0.032647 | 48564967  | 48565289  | 48569482  | 48569621  |
| 330 NA10839 | [2515685 chr10 | 10 | 48574881  | 48597046  | 22166  | 54  | -0.336958 | 0.017353 | 48574098  | 48575665  | 48594300  | 48600231  |
| 331 NA10839 | [2515685 chr10 | 10 | 48606762  | 48611077  | 4316   | 15  | -0.35667  | 0.033042 | 48606702  | 48606822  | 48610821  | 48611331  |
| 332 NA10839 | [2515685 chr10 | 10 | 48620019  | 48865591  | 245573 | 176 | -0.382726 | 0.009063 | 48619988  | 48620051  | 48865564  | 48865611  |
| 333 NA10839 | [2515685 chr10 | 10 | 48925221  | 48927636  | 2416   | 10  | -0.467129 | 0.045722 | 48924954  | 48925488  | 48927550  | 48927721  |
| 334 NA10839 | [2515685 chr10 | 10 | 51120710  | 51129602  | 8893   | 11  | -0.446857 | 0.037591 | 51120483  | 51120937  | 51128757  | 51130441  |
| 335 NA10839 | [2515685 chr10 | 10 | 56117212  | 56139275  | 22064  | 20  | -1.051053 | 0.03539  | 56115764  | 56118661  | 56138931  | 56139611  |
| 336 NA10839 | [2515685 chr10 | 10 | 59437337  | 59438541  | 1205   | 2   | -0.565693 | 0.10009  | 59437083  | 59437592  | 59437992  | 59439091  |
| 337 NA10839 | [2515685 chr10 | 10 | 81144645  | 81173619  | 28975  | 28  | -0.272952 | 0.022607 | 81144276  | 81145014  | 81171386  | 81175851  |
| 338 NA10839 | [2515685 chr10 | 10 | 81464835  | 81493795  | 28961  | 26  | -0.265276 | 0.023533 | 81464464  | 81465206  | 81491562  | 81496021  |
| 339 NA10839 | [2515685 chr10 | 10 | 81662561  | 81669493  | 6933   | 10  | -0.262246 | 0.045173 | 81662046  | 81663077  | 81669128  | 81669851  |
| 340 NA10839 | [2515685 chr10 | 10 | 88826359  | 88834972  | 8614   | 11  | -0.268374 | 0.043328 | 88826134  | 88826585  | 88834493  | 88835451  |
| 341 NA10839 | [2515685 chr10 | 10 | 88866216  | 88962817  | 96602  | 106 | -0.364248 | 0.013149 | 88865617  | 88866816  | 88962401  | 88963231  |
| 342 NA10839 | [2515685 chr10 | 10 | 89144361  | 89180666  | 36306  | 57  | -0.295306 | 0.01845  | 89144303  | 89144420  | 89180586  | 89180741  |
| 343 NA10839 | [2515685 chr10 | 10 | 124336365 | 124341749 | 5385   | 6   | 0.637051  | 0.06764  | 124335581 | 124337149 | 124341238 | 12434226  |
| 344 NA10839 | [2515685 chr10 | 10 | 124350353 | 124366738 | 16386  | 21  | -0.455039 | 0.025476 | 124350031 | 124350675 | 124366300 | 124367171 |
| 345 NA10839 | [2515685 chr10 | 10 | 133602364 | 133603160 | 797    | 11  | -0.334116 | 0.041411 | 133602112 | 133602617 | 133602987 | 133603331 |
| 346 NA10839 | [2515685 chr10 | 10 | 134168766 | 134170259 | 1494   | 17  | -0.312308 | 0.038996 | 134168524 | 134169008 | 134170097 | 134170421 |
| 347 NA10839 | [2515685 chr10 | 10 | 135344083 | 135349561 | 5479   | 7   | -0.281377 | 0.053841 | 135343880 | 135344287 | 135348498 | 135350621 |
| 348 NA10839 | [2515685 chr11 | 11 | 50775     | 51386     | 612    | 2   | -0.558667 | 0.096185 | 50718     | 50833     | 50833     | 5194C     |
| 349 NA10839 | [2515685 chr11 | 11 | 3628748   | 3632795   | 4048   | 6   | 0.822285  | 0.065693 | 3625722   | 3631775   | 3632594   | 3632991   |
| 350 NA10839 | [2515685 chr11 | 11 | 4489613   | 4490685   | 1073   | 3   | -0.442981 | 0.087412 | 4489484   | 4489742   | 4490483   | 4490881   |
| 351 NA10839 | [2515685 chr11 | 11 | 4924831   | 4933540   | 8710   | 9   | -0.845421 | 0.050461 | 4924403   | 4925260   | 4933251   | 4933831   |
| 352 NA10839 | [2515685 chr11 | 11 | 5741269   | 5765993   | 24725  | 33  | 3.10157   | 0.049244 | 5741059   | 5741480   | 5765632   | 5766351   |
| 353 NA10839 | [2515685 chr11 | 11 | 11780222  | 11782174  | 1953   | 2   | -0.792278 | 0.101306 | 11779958  | 11780486  | 11781057  | 11783291  |
| 354 NA10839 | [2515685 chr11 | 11 | 11831868  | 11833089  | 1222   | 2   | 0.881774  | 0.11411  | 11831412  | 11832324  | 11832853  | 11833321  |
| 355 NA10839 | [2515685 chr11 | 11 | 18903449  | 18923023  | 19575  | 30  | 0.804866  | 0.027937 | 18897800  | 18906533  | 18919939  | 18928451  |
| 356 NA10839 | [2515685 chr11 | 11 | 28965605  | 28969186  | 3582   | 5   | 3.723444  | 0.164905 | 28965284  | 28965927  | 28968702  | 28969671  |

|             |                |    |           |           |        |     |           |          |           |           |           |           |
|-------------|----------------|----|-----------|-----------|--------|-----|-----------|----------|-----------|-----------|-----------|-----------|
| 357 NA10839 | [2515685 chr11 | 11 | 48284073  | 48284771  | 699    | 2   | 1.055108  | 0.107429 | 48283862  | 48284285  | 48284572  | 48284971  |
| 358 NA10839 | [2515685 chr11 | 11 | 49072856  | 49075952  | 3097   | 6   | 0.309316  | 0.060322 | 49072572  | 49073140  | 49075650  | 49076254  |
| 359 NA10839 | [2515685 chr11 | 11 | 49665830  | 49715832  | 50003  | 36  | 0.509183  | 0.024971 | 49665251  | 49666410  | 49712748  | 49721984  |
| 360 NA10839 | [2515685 chr11 | 11 | 50233802  | 50235333  | 1532   | 3   | -0.393391 | 0.068551 | 50233483  | 50234121  | 50234922  | 50235744  |
| 361 NA10839 | [2515685 chr11 | 11 | 55124643  | 55212652  | 88010  | 98  | -0.853506 | 0.016219 | 55124460  | 55124827  | 55209568  | 55215754  |
| 362 NA10839 | [2515685 chr11 | 11 | 73812690  | 73818580  | 5891   | 4   | -0.559863 | 0.078646 | 73812400  | 73812981  | 73818213  | 73818944  |
| 363 NA10839 | [2515685 chr11 | 11 | 89184898  | 89188706  | 3809   | 4   | 0.422649  | 0.078704 | 89184243  | 89185554  | 89188235  | 89189174  |
| 364 NA10839 | [2515685 chr11 | 11 | 106744846 | 106746569 | 1724   | 5   | -0.930201 | 0.075522 | 106744561 | 106745131 | 106746367 | 106746774 |
| 365 NA10839 | [2515685 chr11 | 11 | 106747019 | 106751055 | 4037   | 3   | -0.770122 | 0.097275 | 106746772 | 106747267 | 106747971 | 106754834 |
| 366 NA10839 | [2515685 chr11 | 11 | 122347638 | 122349802 | 2165   | 2   | -0.612835 | 0.116166 | 122346856 | 122348420 | 122349242 | 122350364 |
| 367 NA10839 | [2515685 chr11 | 11 | 134107699 | 134112290 | 4592   | 5   | 0.895913  | 0.071178 | 134106591 | 134108808 | 134111845 | 134112734 |
| 368 NA10839 | [2515685 chr12 | 12 | 394206    | 404873    | 10668  | 17  | -0.307687 | 0.030467 | 393986    | 394426    | 401600    | 408146    |
| 369 NA10839 | [2515685 chr12 | 12 | 736840    | 744802    | 7963   | 9   | 0.933824  | 0.051818 | 736616    | 737064    | 744211    | 745394    |
| 370 NA10839 | [2515685 chr12 | 12 | 6113530   | 6118188   | 4659   | 4   | 0.724344  | 0.083704 | 6111640   | 6115421   | 6117816   | 6118564   |
| 371 NA10839 | [2515685 chr12 | 12 | 8262986   | 8270350   | 7365   | 18  | -0.380389 | 0.031278 | 8262374   | 8263598   | 8269654   | 8271044   |
| 372 NA10839 | [2515685 chr12 | 12 | 9439347   | 9445623   | 6277   | 10  | 0.484029  | 0.043449 | 9439120   | 9439574   | 9445247   | 9446004   |
| 373 NA10839 | [2515685 chr12 | 12 | 9524239   | 9624971   | 100733 | 107 | 1.079027  | 0.016581 | 9523968   | 9524510   | 9623223   | 9626724   |
| 374 NA10839 | [2515685 chr12 | 12 | 9646904   | 9649697   | 2794   | 3   | 0.687757  | 0.084657 | 9646692   | 9647116   | 9649433   | 9649964   |
| 375 NA10839 | [2515685 chr12 | 12 | 11070849  | 11083764  | 12916  | 19  | -0.263275 | 0.033162 | 11069857  | 11071841  | 11083559  | 11083964  |
| 376 NA10839 | [2515685 chr12 | 12 | 11109398  | 11142012  | 32615  | 40  | -0.386879 | 0.023282 | 11109206  | 11109590  | 11141608  | 11142414  |
| 377 NA10839 | [2515685 chr12 | 12 | 11398049  | 11442861  | 44813  | 44  | -0.36099  | 0.022133 | 11397507  | 11398591  | 11442625  | 11443094  |
| 378 NA10839 | [2515685 chr12 | 12 | 31155331  | 31244780  | 89450  | 84  | 0.682458  | 0.016881 | 31155092  | 31155571  | 31244217  | 31245344  |
| 379 NA10839 | [2515685 chr12 | 12 | 39163572  | 39169511  | 5940   | 5   | 0.358345  | 0.060495 | 39163332  | 39163813  | 39168374  | 39170644  |
| 380 NA10839 | [2515685 chr12 | 12 | 46994634  | 46995975  | 1342   | 2   | -2.403991 | 0.195486 | 46994358  | 46994911  | 46995667  | 46996284  |
| 381 NA10839 | [2515685 chr12 | 12 | 57004588  | 57020201  | 15614  | 8   | 0.331933  | 0.053245 | 57004218  | 57004958  | 57019624  | 57020774  |
| 382 NA10839 | [2515685 chr12 | 12 | 69156916  | 69167892  | 10977  | 11  | 0.854305  | 0.049287 | 69138649  | 69160412  | 69164396  | 69215014  |
| 383 NA10839 | [2515685 chr12 | 12 | 126009949 | 126112215 | 102267 | 3   | -0.514272 | 0.079643 | 125852405 | 126013445 | 126110107 | 126114324 |
| 384 NA10839 | [2515685 chr12 | 12 | 130257877 | 130259876 | 2000   | 3   | -0.577102 | 0.07816  | 130257493 | 130258262 | 130259649 | 130260104 |
| 385 NA10839 | [2515685 chr12 | 12 | 130282558 | 130283672 | 1115   | 2   | 0.53821   | 0.082372 | 130282349 | 130282768 | 130283302 | 130284044 |
| 386 NA10839 | [2515685 chr12 | 12 | 130316795 | 130321241 | 4447   | 7   | 0.317141  | 0.057614 | 130316384 | 130317207 | 130320997 | 130321484 |
| 387 NA10839 | [2515685 chr12 | 12 | 130798727 | 130802870 | 4144   | 5   | -0.817604 | 0.063266 | 130798268 | 130799187 | 130801345 | 130804394 |
| 388 NA10839 | [2515685 chr13 | 13 | 33029569  | 33043421  | 13853  | 9   | 0.835636  | 0.055864 | 33000262  | 33034253  | 33042925  | 33043914  |
| 389 NA10839 | [2515685 chr13 | 13 | 36971484  | 36983475  | 11992  | 10  | -3.806149 | 0.102668 | 36969416  | 36973552  | 36982905  | 36984044  |
| 390 NA10839 | [2515685 chr13 | 13 | 53596297  | 53598631  | 2335   | 2   | -0.590853 | 0.113082 | 53595731  | 53596864  | 53598230  | 53599034  |
| 391 NA10839 | [2515685 chr13 | 13 | 56653890  | 56687244  | 33355  | 31  | -0.95784  | 0.030227 | 56650401  | 56657380  | 56686891  | 56687594  |
| 392 NA10839 | [2515685 chr13 | 13 | 64419589  | 64428981  | 9393   | 9   | -0.276799 | 0.053061 | 64419177  | 64420002  | 64428574  | 64429384  |
| 393 NA10839 | [2515685 chr13 | 13 | 69633905  | 69673289  | 39385  | 42  | 0.815442  | 0.024421 | 69633412  | 69634399  | 69672985  | 69673594  |
| 394 NA10839 | [2515685 chr13 | 13 | 71375850  | 71378291  | 2442   | 2   | -3.814769 | 0.28429  | 71374967  | 71376734  | 71377584  | 71378994  |
| 395 NA10839 | [2515685 chr13 | 13 | 108362155 | 108365316 | 3162   | 3   | -0.52367  | 0.092128 | 108361324 | 108362986 | 108364830 | 108365804 |
| 396 NA10839 | [2515685 chr13 | 13 | 109216120 | 109219740 | 3621   | 8   | -0.296891 | 0.051093 | 109216090 | 109216150 | 109219483 | 109219994 |
| 397 NA10839 | [2515685 chr13 | 13 | 110502383 | 110503129 | 747    | 3   | -0.987604 | 0.101125 | 110502225 | 110502541 | 110502890 | 110503364 |
| 398 NA10839 | [2515685 chr14 | 14 | 18955661  | 18956256  | 596    | 2   | -0.572246 | 0.100189 | 18955372  | 18955951  | 18956048  | 18956464  |
| 399 NA10839 | [2515685 chr14 | 14 | 19270361  | 19494842  | 224482 | 210 | 0.280621  | 0.010142 | 19270002  | 19270720  | 19494444  | 19495244  |
| 400 NA10839 | [2515685 chr14 | 14 | 19619348  | 19625484  | 6137   | 3   | 3.71516   | 0.226916 | 19612261  | 19624114  | 19625018  | 19625954  |
| 401 NA10839 | [2515685 chr14 | 14 | 32022775  | 32026140  | 3366   | 2   | -1.331318 | 0.131519 | 32022274  | 32023276  | 32023749  | 32028534  |
| 402 NA10839 | [2515685 chr14 | 14 | 34086351  | 34089274  | 2924   | 3   | -0.708411 | 0.086338 | 34086257  | 34086445  | 34089057  | 34089494  |
| 403 NA10839 | [2515685 chr14 | 14 | 40679041  | 40739449  | 60409  | 57  | -0.910664 | 0.022106 | 40678078  | 40680005  | 40739212  | 40739684  |
| 404 NA10839 | [2515685 chr14 | 14 | 42059344  | 42062997  | 3654   | 2   | 0.717927  | 0.117954 | 42056485  | 42062203  | 42062601  | 42063394  |
| 405 NA10839 | [2515685 chr14 | 14 | 43484527  | 43486213  | 1687   | 2   | -1.20618  | 0.143505 | 43483826  | 43485228  | 43485983  | 43486444  |
| 406 NA10839 | [2515685 chr14 | 14 | 73063171  | 73119729  | 56559  | 51  | 0.500825  | 0.020883 | 73061866  | 73064476  | 73118276  | 73121184  |
| 407 NA10839 | [2515685 chr14 | 14 | 77194461  | 77196644  | 2184   | 2   | 0.649896  | 0.103392 | 77194213  | 77194710  | 77196380  | 77196904  |
| 408 NA10839 | [2515685 chr14 | 14 | 104766812 | 104778505 | 11694  | 145 | -0.479976 | 0.010833 | 104766457 | 104767167 | 104778286 | 104778724 |
| 409 NA10839 | [2515685 chr15 | 15 | 18555968  | 18557255  | 1288   | 2   | -0.714821 | 0.112004 | 18555543  | 18556394  | 18556441  | 18558064  |
| 410 NA10839 | [2515685 chr15 | 15 | 18631540  | 18705202  | 73663  | 72  | -0.272268 | 0.016711 | 18631292  | 18631788  | 18704600  | 18705804  |
| 411 NA10839 | [2515685 chr15 | 15 | 18824476  | 18885687  | 61212  | 68  | -0.295597 | 0.017865 | 18824302  | 18824650  | 18885482  | 18885894  |

|             |                |    |           |           |        |     |           |          |           |           |           |          |
|-------------|----------------|----|-----------|-----------|--------|-----|-----------|----------|-----------|-----------|-----------|----------|
| 412 NA10839 | [2515685 chr15 | 15 | 19050775  | 19056269  | 5495   | 3   | -0.375318 | 0.06476  | 19048080  | 19053078  | 19056068  | 19056471 |
| 413 NA10839 | [2515685 chr15 | 15 | 19423414  | 19433642  | 10229  | 15  | -0.306631 | 0.037144 | 19422609  | 19424220  | 19433151  | 1943413  |
| 414 NA10839 | [2515685 chr15 | 15 | 19661791  | 19763727  | 101937 | 4   | -0.432269 | 0.062763 | 19661464  | 19662119  | 19763507  | 1976394  |
| 415 NA10839 | [2515685 chr15 | 15 | 20228094  | 20234328  | 6235   | 12  | 0.827643  | 0.040691 | 20226486  | 20229703  | 20233781  | 2023487  |
| 416 NA10839 | [2515685 chr15 | 15 | 21009587  | 21015599  | 6013   | 4   | -0.375156 | 0.058857 | 21006900  | 21011890  | 21015285  | 2101591  |
| 417 NA10839 | [2515685 chr15 | 15 | 21605983  | 21614601  | 8619   | 8   | 0.754836  | 0.060802 | 21605507  | 21606459  | 21612298  | 2163669  |
| 418 NA10839 | [2515685 chr15 | 15 | 22203281  | 22273856  | 70576  | 86  | -0.274896 | 0.015616 | 22202730  | 22203833  | 22273719  | 2227399  |
| 419 NA10839 | [2515685 chr15 | 15 | 24986053  | 24992250  | 6198   | 7   | 0.846201  | 0.062663 | 24985426  | 24986680  | 24991680  | 2499282  |
| 420 NA10839 | [2515685 chr15 | 15 | 26316393  | 26323692  | 7300   | 10  | 0.252693  | 0.046713 | 26314214  | 26318572  | 26323198  | 2632418  |
| 421 NA10839 | [2515685 chr15 | 15 | 26331811  | 26343818  | 12008  | 25  | 0.832683  | 0.028245 | 26331265  | 26332358  | 26342288  | 2634534  |
| 422 NA10839 | [2515685 chr15 | 15 | 26536521  | 26542764  | 6244   | 12  | 0.829518  | 0.038782 | 26534914  | 26538129  | 26542214  | 2654331  |
| 423 NA10839 | [2515685 chr15 | 15 | 26550607  | 26558193  | 7587   | 9   | 0.255286  | 0.049071 | 26549829  | 26551386  | 26556040  | 2656034  |
| 424 NA10839 | [2515685 chr15 | 15 | 26608998  | 26610934  | 1937   | 8   | 0.26993   | 0.044309 | 26608799  | 26609197  | 26610755  | 2661111  |
| 425 NA10839 | [2515685 chr15 | 15 | 27133610  | 27134889  | 1280   | 4   | 0.504325  | 0.076047 | 27133306  | 27133914  | 27134660  | 2713511  |
| 426 NA10839 | [2515685 chr15 | 15 | 32461224  | 32656877  | 195654 | 200 | 0.368746  | 0.009485 | 32460923  | 32461525  | 32656150  | 3265760  |
| 427 NA10839 | [2515685 chr15 | 15 | 39889385  | 39890850  | 1466   | 2   | 0.529751  | 0.096953 | 39888917  | 39889854  | 39890418  | 3989128  |
| 428 NA10839 | [2515685 chr15 | 15 | 74678877  | 74682821  | 3945   | 7   | -4.237895 | 0.143246 | 74678381  | 74679373  | 74680518  | 7468951  |
| 429 NA10839 | [2515685 chr15 | 15 | 75117585  | 75119946  | 2362   | 4   | -2.183692 | 0.11011  | 75117343  | 75117827  | 75119741  | 7512015  |
| 430 NA10839 | [2515685 chr15 | 15 | 100109640 | 100122682 | 13043  | 98  | 0.557876  | 0.011706 | 100108905 | 100110376 | 100122315 | 10012305 |
| 431 NA10839 | [2515685 chr15 | 15 | 100176655 | 100219687 | 43033  | 37  | 0.470178  | 0.023718 | 100176426 | 100176884 | 100217384 | 10022219 |
| 432 NA10839 | [2515685 chr15 | 15 | 100259782 | 100262143 | 2362   | 2   | -0.558667 | 0.096185 | 100255180 | 100262085 | 100262085 | 10026220 |
| 433 NA10839 | [2515685 chr16 | 16 | 822510    | 824472    | 1963   | 2   | 0.526561  | 0.084431 | 822150    | 822871    | 823847    | 82509    |
| 434 NA10839 | [2515685 chr16 | 16 | 946002    | 948831    | 2830   | 2   | -1.08456  | 0.116726 | 945660    | 946345    | 947314    | 95034    |
| 435 NA10839 | [2515685 chr16 | 16 | 2104285   | 2118066   | 13782  | 9   | 0.314437  | 0.041453 | 2103685   | 2104886   | 2117657   | 211847   |
| 436 NA10839 | [2515685 chr16 | 16 | 5287117   | 5290632   | 3516   | 2   | -0.779289 | 0.133635 | 5286149   | 5288085   | 5288751   | 529327   |
| 437 NA10839 | [2515685 chr16 | 16 | 14699048  | 14708761  | 9714   | 8   | 0.319394  | 0.039273 | 14696316  | 14700929  | 14708411  | 1470911  |
| 438 NA10839 | [2515685 chr16 | 16 | 14738166  | 14747883  | 9718   | 8   | 0.319394  | 0.039273 | 14735434  | 14740047  | 14747533  | 1474823  |
| 439 NA10839 | [2515685 chr16 | 16 | 14915595  | 14929240  | 13646  | 38  | 0.258263  | 0.0203   | 14915197  | 14915993  | 14928914  | 1492956  |
| 440 NA10839 | [2515685 chr16 | 16 | 16633469  | 16639120  | 5652   | 4   | 0.480035  | 0.073373 | 16632502  | 16634437  | 16638386  | 1663985  |
| 441 NA10839 | [2515685 chr16 | 16 | 18010627  | 18014401  | 3775   | 3   | -0.447971 | 0.079337 | 18010196  | 18011059  | 18012775  | 1801602  |
| 442 NA10839 | [2515685 chr16 | 16 | 18340450  | 18356148  | 15699  | 48  | 0.262618  | 0.018073 | 18340304  | 18340596  | 18354801  | 1835749  |
| 443 NA10839 | [2515685 chr16 | 16 | 21423444  | 21502620  | 79177  | 75  | 0.288874  | 0.015849 | 21422529  | 21424359  | 21501101  | 2150414  |
| 444 NA10839 | [2515685 chr16 | 16 | 22458848  | 22618743  | 159896 | 146 | 0.301531  | 0.011332 | 22457280  | 22460417  | 22617181  | 2262030  |
| 445 NA10839 | [2515685 chr16 | 16 | 28324917  | 28332627  | 7711   | 5   | -0.63684  | 0.068382 | 28324665  | 28325169  | 28332615  | 2833263  |
| 446 NA10839 | [2515685 chr16 | 16 | 28522768  | 28525408  | 2641   | 3   | -0.43495  | 0.076727 | 28522366  | 28523170  | 28525115  | 2852570  |
| 447 NA10839 | [2515685 chr16 | 16 | 28620329  | 28628077  | 7749   | 5   | -0.63684  | 0.068382 | 28620317  | 28620341  | 28627777  | 2862837  |
| 448 NA10839 | [2515685 chr16 | 16 | 28640305  | 28641597  | 1293   | 2   | -0.65058  | 0.091195 | 28640208  | 28640403  | 28641268  | 2864192  |
| 449 NA10839 | [2515685 chr16 | 16 | 30109671  | 30115274  | 5604   | 8   | 0.30092   | 0.040064 | 30109361  | 30109981  | 30115063  | 3011548  |
| 450 NA10839 | [2515685 chr16 | 16 | 32154214  | 32197170  | 42957  | 98  | -0.377024 | 0.013051 | 32154161  | 32154267  | 32196926  | 3219741  |
| 451 NA10839 | [2515685 chr16 | 16 | 32210096  | 32219640  | 9545   | 19  | -0.431189 | 0.028002 | 32209551  | 32210641  | 32219531  | 3221974  |
| 452 NA10839 | [2515685 chr16 | 16 | 32479456  | 32560619  | 81164  | 86  | -0.340945 | 0.009462 | 32400448  | 32481337  | 32559391  | 3256184  |
| 453 NA10839 | [2515685 chr16 | 16 | 32570265  | 32612861  | 42597  | 103 | -0.340945 | 0.009462 | 32570138  | 32570393  | 32612808  | 3261291  |
| 454 NA10839 | [2515685 chr16 | 16 | 32614929  | 32616183  | 1255   | 2   | -0.568938 | 0.08703  | 32614897  | 32614961  | 32615350  | 3261701  |
| 455 NA10839 | [2515685 chr16 | 16 | 32765698  | 32770205  | 4508   | 7   | -0.297627 | 0.056383 | 32765344  | 32766052  | 32768324  | 3277390  |
| 456 NA10839 | [2515685 chr16 | 16 | 33095178  | 33194268  | 99091  | 227 | -0.34266  | 0.008457 | 33095125  | 33095231  | 33194099  | 3319443  |
| 457 NA10839 | [2515685 chr16 | 16 | 33207215  | 33217055  | 9841   | 18  | -0.446928 | 0.029114 | 33206951  | 33207480  | 33216946  | 3321716  |
| 458 NA10839 | [2515685 chr16 | 16 | 33320995  | 33397742  | 76748  | 100 | -0.317972 | 0.014195 | 33320531  | 33321459  | 33397495  | 3339799  |
| 459 NA10839 | [2515685 chr16 | 16 | 33448466  | 33475069  | 26604  | 8   | -0.577583 | 0.055896 | 33447836  | 33449096  | 33474503  | 3347563  |
| 460 NA10839 | [2515685 chr16 | 16 | 33502420  | 33540388  | 37969  | 47  | -0.352736 | 0.021581 | 33502141  | 33502700  | 33540294  | 3354048  |
| 461 NA10839 | [2515685 chr16 | 16 | 33720146  | 33723491  | 3346   | 5   | -0.33164  | 0.061339 | 33716428  | 33722027  | 33723206  | 3372377  |
| 462 NA10839 | [2515685 chr16 | 16 | 34321825  | 34342005  | 20181  | 31  | -0.49698  | 0.008279 | 34317185  | 34323706  | 34341760  | 3434225  |
| 463 NA10839 | [2515685 chr16 | 16 | 34343871  | 34609074  | 265204 | 287 | -0.49698  | 0.008279 | 34343515  | 34344228  | 34607193  | 3461732  |
| 464 NA10839 | [2515685 chr16 | 16 | 54353711  | 54362962  | 9252   | 10  | -0.337406 | 0.048757 | 54353419  | 54354004  | 54362223  | 5436370  |
| 465 NA10839 | [2515685 chr16 | 16 | 54365075  | 54369383  | 4309   | 6   | -0.725329 | 0.055779 | 54364721  | 54365430  | 54368899  | 5436986  |
| 466 NA10839 | [2515685 chr16 | 16 | 54376230  | 54380125  | 3896   | 3   | -0.654552 | 0.092438 | 54375462  | 54376998  | 54379862  | 5438038  |

|             |                |    |          |          |        |     |           |          |          |          |          |          |
|-------------|----------------|----|----------|----------|--------|-----|-----------|----------|----------|----------|----------|----------|
| 467 NA10839 | [2515685 chr16 | 16 | 54398023 | 54423973 | 25951  | 34  | 0.267539  | 0.026006 | 54397874 | 54398173 | 54423188 | 54424751 |
| 468 NA10839 | [2515685 chr16 | 16 | 57204541 | 57207585 | 3045   | 3   | 4.703466  | 0.205874 | 57204170 | 57204913 | 57206938 | 57208231 |
| 469 NA10839 | [2515685 chr16 | 16 | 57231525 | 57234603 | 3079   | 2   | -0.650484 | 0.094244 | 57230452 | 57232599 | 57233543 | 57235661 |
| 470 NA10839 | [2515685 chr16 | 16 | 68706855 | 68755580 | 48726  | 53  | -0.300509 | 0.019816 | 68705436 | 68708274 | 68755265 | 68755891 |
| 471 NA10839 | [2515685 chr16 | 16 | 86669849 | 86672366 | 2518   | 2   | -0.905173 | 0.095127 | 86669288 | 86670411 | 86671217 | 86673511 |
| 472 NA10839 | [2515685 chr17 | 17 | 966845   | 969578   | 2734   | 21  | 0.788454  | 0.03642  | 966537   | 967154   | 969378   | 969775   |
| 473 NA10839 | [2515685 chr17 | 17 | 13498423 | 13499435 | 1013   | 2   | -0.585284 | 0.114542 | 13498240 | 13498607 | 13499132 | 13499731 |
| 474 NA10839 | [2515685 chr17 | 17 | 18299050 | 18345735 | 46686  | 75  | 0.267458  | 0.016658 | 18298294 | 18299807 | 18345512 | 18345951 |
| 475 NA10839 | [2515685 chr17 | 17 | 20299935 | 20300531 | 597    | 2   | -0.486528 | 0.093733 | 20299568 | 20300303 | 20300311 | 20300751 |
| 476 NA10839 | [2515685 chr17 | 17 | 20303847 | 20329497 | 25651  | 36  | 0.314393  | 0.023524 | 20303588 | 20304107 | 20329054 | 20329941 |
| 477 NA10839 | [2515685 chr17 | 17 | 20622476 | 20629121 | 6646   | 5   | 0.330863  | 0.06333  | 20620424 | 20624529 | 20628851 | 20629391 |
| 478 NA10839 | [2515685 chr17 | 17 | 21415033 | 21418282 | 3250   | 2   | 0.645641  | 0.114645 | 21410935 | 21417234 | 21417641 | 21418921 |
| 479 NA10839 | [2515685 chr17 | 17 | 21826349 | 21834752 | 8404   | 7   | 0.676822  | 0.046633 | 21826238 | 21826461 | 21833710 | 21835791 |
| 480 NA10839 | [2515685 chr17 | 17 | 21942843 | 21954469 | 11627  | 19  | -0.343993 | 0.032336 | 21942618 | 21943068 | 21954310 | 21954621 |
| 481 NA10839 | [2515685 chr17 | 17 | 31544784 | 31545508 | 725    | 2   | -0.752263 | 0.087969 | 31544616 | 31544952 | 31545213 | 31545801 |
| 482 NA10839 | [2515685 chr17 | 17 | 31553836 | 31589209 | 35374  | 47  | -0.287805 | 0.018279 | 31553290 | 31554383 | 31588868 | 31589551 |
| 483 NA10839 | [2515685 chr17 | 17 | 31655392 | 31814873 | 159482 | 101 | -0.258676 | 0.012519 | 31654846 | 31655939 | 31814755 | 31814991 |
| 484 NA10839 | [2515685 chr17 | 17 | 32829500 | 32833231 | 3732   | 5   | 0.921329  | 0.075965 | 32828825 | 32830175 | 32832670 | 32833791 |
| 485 NA10839 | [2515685 chr17 | 17 | 33385578 | 33407706 | 22129  | 31  | -0.321635 | 0.024291 | 33385532 | 33385625 | 33407335 | 33408071 |
| 486 NA10839 | [2515685 chr17 | 17 | 33425794 | 33535932 | 110139 | 27  | -0.321314 | 0.025841 | 33425759 | 33425830 | 33535814 | 33536051 |
| 487 NA10839 | [2515685 chr17 | 17 | 33654387 | 33658961 | 4575   | 11  | -0.412692 | 0.043696 | 33653601 | 33655173 | 33658926 | 33658991 |
| 488 NA10839 | [2515685 chr17 | 17 | 36675530 | 36685343 | 9814   | 10  | -0.860108 | 0.049951 | 36675011 | 36676049 | 36684647 | 36686041 |
| 489 NA10839 | [2515685 chr17 | 17 | 36925980 | 36928437 | 2458   | 3   | 0.415677  | 0.08212  | 36925579 | 36926382 | 36928001 | 36928871 |
| 490 NA10839 | [2515685 chr17 | 17 | 40928267 | 41060452 | 132186 | 178 | 0.346871  | 0.010357 | 40927895 | 40928640 | 41058251 | 41062691 |
| 491 NA10839 | [2515685 chr17 | 17 | 41521287 | 42137411 | 616125 | 683 | 0.50879   | 0.004998 | 41521002 | 41521572 | 42135210 | 42141941 |
| 492 NA10839 | [2515685 chr17 | 17 | 42446566 | 42488850 | 42285  | 71  | 0.386799  | 0.016173 | 42446148 | 42446985 | 42487442 | 42490251 |
| 493 NA10839 | [2515685 chr17 | 17 | 60269002 | 60360580 | 91579  | 131 | 0.373109  | 0.012207 | 60268357 | 60269648 | 60360559 | 60360601 |
| 494 NA10839 | [2515685 chr17 | 17 | 63634119 | 63659132 | 25014  | 2   | 0.432673  | 0.079082 | 63587668 | 63636320 | 63656931 | 63677911 |
| 495 NA10839 | [2515685 chr17 | 17 | 75019369 | 75020755 | 1387   | 3   | -0.372151 | 0.064689 | 75019115 | 75019623 | 75020523 | 75020981 |
| 496 NA10839 | [2515685 chr17 | 17 | 75223639 | 75225100 | 1462   | 4   | -0.427233 | 0.056269 | 75223385 | 75223893 | 75224893 | 75225301 |
| 497 NA10839 | [2515685 chr18 | 18 | 3998874  | 4000433  | 1560   | 2   | -0.597774 | 0.103889 | 3998420  | 3999328  | 4000096  | 4000771  |
| 498 NA10839 | [2515685 chr18 | 18 | 6902997  | 6904611  | 1615   | 2   | -0.76629  | 0.118534 | 6902443  | 6903552  | 6904056  | 6905161  |
| 499 NA10839 | [2515685 chr18 | 18 | 12386896 | 12388854 | 1959   | 2   | 0.606664  | 0.090639 | 12386442 | 12387350 | 12388203 | 12389501 |
| 500 NA10839 | [2515685 chr18 | 18 | 14726980 | 14737487 | 10508  | 14  | -0.304456 | 0.037042 | 14726667 | 14727294 | 14736475 | 14738491 |
| 501 NA10839 | [2515685 chr18 | 18 | 36514289 | 36521090 | 6802   | 6   | -3.173236 | 0.105574 | 36513759 | 36514820 | 36520512 | 36521661 |
| 502 NA10839 | [2515685 chr18 | 18 | 61917747 | 61920171 | 2425   | 4   | 4.733202  | 0.18334  | 61917522 | 61917973 | 61919646 | 61920691 |
| 503 NA10839 | [2515685 chr18 | 18 | 74297715 | 74299391 | 1677   | 5   | -0.722173 | 0.063376 | 74297243 | 74298187 | 74299167 | 74299611 |
| 504 NA10839 | [2515685 chr18 | 18 | 74392800 | 74397377 | 4578   | 3   | 0.793498  | 0.099709 | 74390826 | 74394774 | 74396965 | 74397791 |
| 505 NA10839 | [2515685 chr19 | 19 | 81406    | 82018    | 613    | 2   | -0.558667 | 0.096185 | 81349    | 81464    | 81464    | 82572    |
| 506 NA10839 | [2515685 chr19 | 19 | 310414   | 312953   | 2540   | 14  | -0.57215  | 0.038081 | 309687   | 311142   | 312913   | 312994   |
| 507 NA10839 | [2515685 chr19 | 19 | 331568   | 333129   | 1562   | 2   | 1.05798   | 0.101067 | 331314   | 331822   | 332310   | 333946   |
| 508 NA10839 | [2515685 chr19 | 19 | 1200296  | 1202522  | 2227   | 3   | 0.462096  | 0.089584 | 1199725  | 1200868  | 1202197  | 1202841  |
| 509 NA10839 | [2515685 chr19 | 19 | 1352259  | 1353860  | 1602   | 2   | 0.864848  | 0.120278 | 1351723  | 1352795  | 1353360  | 1354361  |
| 510 NA10839 | [2515685 chr19 | 19 | 8708780  | 8761628  | 52849  | 91  | 0.38294   | 0.012328 | 8708296  | 8709264  | 8761174  | 8762081  |
| 511 NA10839 | [2515685 chr19 | 19 | 20387625 | 20389273 | 1649   | 5   | -0.348347 | 0.068418 | 20387407 | 20387844 | 20389176 | 20389371 |
| 512 NA10839 | [2515685 chr19 | 19 | 20396073 | 20510144 | 114072 | 64  | -0.531316 | 0.019084 | 20389518 | 20398603 | 20509558 | 20510731 |
| 513 NA10839 | [2515685 chr19 | 19 | 23007901 | 23014812 | 6912   | 7   | 0.712442  | 0.062676 | 22990964 | 23010431 | 23014157 | 23015461 |
| 514 NA10839 | [2515685 chr19 | 19 | 23257205 | 23258538 | 1334   | 2   | -0.991125 | 0.126917 | 23256882 | 23257529 | 23258213 | 23258861 |
| 515 NA10839 | [2515685 chr19 | 19 | 23597182 | 23600235 | 3054   | 5   | -0.894018 | 0.070417 | 23596541 | 23597823 | 23599600 | 23600871 |
| 516 NA10839 | [2515685 chr19 | 19 | 23685380 | 23687053 | 1674   | 2   | -1.0298   | 0.128716 | 23685163 | 23685598 | 23686210 | 23687891 |
| 517 NA10839 | [2515685 chr19 | 19 | 39419234 | 39422498 | 3265   | 5   | 0.574258  | 0.070258 | 39418853 | 39419616 | 39421681 | 39423311 |
| 518 NA10839 | [2515685 chr19 | 19 | 41450184 | 41500389 | 50206  | 29  | -0.605344 | 0.024486 | 41421528 | 41452714 | 41497859 | 41503581 |
| 519 NA10839 | [2515685 chr19 | 19 | 41532761 | 41540854 | 8094   | 2   | 0.761252  | 0.116121 | 41532090 | 41533433 | 41538691 | 41543011 |
| 520 NA10839 | [2515685 chr19 | 19 | 42450470 | 42487512 | 37043  | 33  | -0.620163 | 0.021951 | 42413600 | 42453000 | 42486487 | 42488531 |
| 521 NA10839 | [2515685 chr19 | 19 | 42534742 | 42540350 | 5609   | 2   | -0.551151 | 0.108161 | 42530910 | 42537272 | 42537820 | 42544711 |

|             |                |    |           |           |        |     |           |          |           |           |           |           |
|-------------|----------------|----|-----------|-----------|--------|-----|-----------|----------|-----------|-----------|-----------|-----------|
| 522 NA10839 | [2515685 chr19 | 19 | 53098479  | 53154327  | 55849  | 104 | -0.349279 | 0.011437 | 53098017  | 53098941  | 53152350  | 5315630!  |
| 523 NA10839 | [2515685 chr19 | 19 | 55285877  | 55337601  | 51725  | 105 | -0.343596 | 0.01129  | 55285730  | 55286025  | 55337070  | 5533813;  |
| 524 NA10839 | [2515685 chr19 | 19 | 56788360  | 56792266  | 3907   | 4   | -0.39351  | 0.068106 | 56788043  | 56788678  | 56791492  | 5679304!  |
| 525 NA10839 | [2515685 chr19 | 19 | 58169057  | 58171564  | 2508   | 2   | 0.56573   | 0.094665 | 58168791  | 58169324  | 58171021  | 5817210!  |
| 526 NA10839 | [2515685 chr19 | 19 | 58210435  | 58246367  | 35933  | 28  | -0.75274  | 0.028459 | 58209863  | 58211007  | 58245896  | 5824683!  |
| 527 NA10839 | [2515685 chr19 | 19 | 59247755  | 59252061  | 4307   | 5   | 0.956705  | 0.071338 | 59246427  | 59249084  | 59251854  | 5925226!  |
| 528 NA10839 | [2515685 chr19 | 19 | 59416091  | 59439924  | 23834  | 32  | 0.358975  | 0.024106 | 59415770  | 59416413  | 59439547  | 5944030;  |
| 529 NA10839 | [2515685 chr19 | 19 | 59492384  | 59498950  | 6567   | 7   | 0.441777  | 0.054858 | 59491977  | 59492791  | 59497077  | 5950082;  |
| 530 NA10839 | [2515685 chr19 | 19 | 60958920  | 60976029  | 17110  | 15  | -0.797048 | 0.039063 | 60957933  | 60959907  | 60957548  | 6097631!  |
| 531 NA10839 | [2515685 chr20 | 20 | 59951513  | 59957050  | 5538   | 18  | 0.566096  | 0.033302 | 59950681  | 59952345  | 59956538  | 5995756;  |
| 532 NA10839 | [2515685 chr20 | 20 | 61708834  | 61711805  | 2972   | 22  | -0.283851 | 0.030737 | 61708573  | 61709096  | 61711616  | 6171199!  |
| 533 NA10839 | [2515685 chr20 | 20 | 62066380  | 62068214  | 1835   | 8   | 1.536348  | 0.058996 | 62066146  | 62066615  | 62067671  | 6206875!  |
| 534 NA10839 | [2515685 chr20 | 20 | 62275204  | 62278560  | 3357   | 36  | 0.325919  | 0.026203 | 62274903  | 62275506  | 62278299  | 6227882`  |
| 535 NA10839 | [2515685 chr22 | 22 | 17032140  | 17254758  | 222619 | 359 | -0.354875 | 0.007226 | 17031480  | 17032801  | 17252078  | 1725908-  |
| 536 NA10839 | [2515685 chr22 | 22 | 18689531  | 19664203  | 974673 | 385 | -0.312335 | 0.004192 | 18686307  | 18692211  | 19568526  | 1966688;  |
| 537 NA10839 | [2515685 chr22 | 22 | 19774486  | 20042869  | 268384 | 398 | -0.312335 | 0.004192 | 19774060  | 19774912  | 20042584  | 2004315-  |
| 538 NA10839 | [2515685 chr22 | 22 | 20048306  | 20063725  | 15420  | 20  | -0.312335 | 0.004192 | 20048017  | 20048596  | 20063575  | 2006387!  |
| 539 NA10839 | [2515685 chr22 | 22 | 20067469  | 20121795  | 54327  | 91  | -0.312335 | 0.004192 | 20067261  | 20067678  | 20121548  | 2012204;  |
| 540 NA10839 | [2515685 chr22 | 22 | 20137248  | 20225049  | 87802  | 130 | -0.312335 | 0.004192 | 20136561  | 20137935  | 20224841  | 2022525!  |
| 541 NA10839 | [2515685 chr22 | 22 | 20228794  | 20243641  | 14848  | 12  | -0.312335 | 0.004192 | 20228644  | 20228944  | 20240961  | 2030228;  |
| 542 NA10839 | [2515685 chr22 | 22 | 21981918  | 22139776  | 157859 | 12  | -0.271675 | 0.041273 | 21980511  | 21983326  | 22139670  | 2213988;  |
| 543 NA10839 | [2515685 chr22 | 22 | 22611178  | 22617550  | 6373   | 8   | -0.321881 | 0.016088 | 22609725  | 22612631  | 22617295  | 2261780!  |
| 544 NA10839 | [2515685 chr22 | 22 | 22623673  | 22657783  | 34111  | 72  | -0.321881 | 0.016088 | 22623407  | 22623940  | 22657533  | 2265803-  |
| 545 NA10839 | [2515685 chr22 | 22 | 22667089  | 22669606  | 2518   | 5   | 0.429768  | 0.064415 | 22666536  | 22667642  | 22669060  | 2267015;  |
| 546 NA10839 | [2515685 chr22 | 22 | 22669606  | 22720154  | 50549  | 53  | 1.109601  | 0.025664 | 22669060  | 22670152  | 22719882  | 2272042!  |
| 547 NA10839 | [2515685 chr22 | 22 | 22721179  | 22729265  | 8087   | 11  | 0.444671  | 0.042766 | 22720466  | 22721893  | 22729812  | 2272961!  |
| 548 NA10839 | [2515685 chr22 | 22 | 33619409  | 33623490  | 4082   | 5   | 0.780371  | 0.068637 | 33618939  | 33619879  | 33622642  | 3362433!  |
| 549 NA10839 | [2515685 chr22 | 22 | 37617530  | 37624011  | 6482   | 8   | -0.916693 | 0.058847 | 37616333  | 37618728  | 37621331  | 3762705!  |
| 550 NA10839 | [2515685 chr22 | 22 | 37683358  | 37710208  | 26851  | 25  | -0.646208 | 0.02974  | 37683063  | 37683653  | 37709974  | 3771044;  |
| 1 NA18942   | [2515685 chr1  | 1  | 76985     | 92337     | 15353  | 9   | 0.322362  | 0.04851  | 76641     | 77329     | 90508     | 94167     |
| 2 NA18942   | [2515685 chr1  | 1  | 601042    | 612159    | 11118  | 8   | -0.786744 | 0.05237  | 587801    | 604315    | 610122    | 61419€    |
| 3 NA18942   | [2515685 chr1  | 1  | 3469925   | 3472567   | 2643   | 2   | -0.530362 | 0.093678 | 3469291   | 3470560   | 3471959   | 347317!   |
| 4 NA18942   | [2515685 chr1  | 1  | 10502804  | 10506053  | 3250   | 3   | 0.446958  | 0.082621 | 10502450  | 10503159  | 10505467  | 1050664!  |
| 5 NA18942   | [2515685 chr1  | 1  | 12829124  | 12854406  | 25283  | 41  | 0.313747  | 0.022227 | 12828579  | 12829669  | 12854279  | 1285453-  |
| 6 NA18942   | [2515685 chr1  | 1  | 12884329  | 12886858  | 2530   | 4   | 0.556858  | 0.057937 | 12884224  | 12884434  | 12886536  | 1288718!  |
| 7 NA18942   | [2515685 chr1  | 1  | 12887275  | 12888178  | 904    | 3   | 0.433984  | 0.073409 | 12887199  | 12887352  | 12887924  | 1288843;  |
| 8 NA18942   | [2515685 chr1  | 1  | 12893626  | 12898767  | 5142   | 8   | 0.287048  | 0.040601 | 12893265  | 12893988  | 12893880  | 1289915!  |
| 9 NA18942   | [2515685 chr1  | 1  | 12910834  | 12926091  | 15258  | 34  | 0.274135  | 0.023108 | 12910436  | 12911233  | 12926004  | 1292617!  |
| 10 NA18942  | [2515685 chr1  | 1  | 12926542  | 12926956  | 415    | 2   | -0.591441 | 0.116236 | 12926307  | 12926778  | 12926804  | 1292710!  |
| 11 NA18942  | [2515685 chr1  | 1  | 13159940  | 13162706  | 2767   | 4   | 0.592065  | 0.053772 | 13159618  | 13160263  | 13162366  | 1316304!  |
| 12 NA18942  | [2515685 chr1  | 1  | 13380737  | 13383503  | 2767   | 4   | 0.592062  | 0.053772 | 13380415  | 13381060  | 13383163  | 1338384-  |
| 13 NA18942  | [2515685 chr1  | 1  | 25330950  | 25479952  | 149003 | 133 | 0.269767  | 0.012423 | 25330662  | 25331238  | 25476679  | 2548421!  |
| 14 NA18942  | [2515685 chr1  | 1  | 72478372  | 72524180  | 45809  | 36  | -3.208462 | 0.049132 | 72478140  | 72478604  | 72523661  | 7252470!  |
| 15 NA18942  | [2515685 chr1  | 1  | 89188117  | 89190762  | 2646   | 5   | 2.012666  | 0.096815 | 89187764  | 89188470  | 89190458  | 8919106!  |
| 16 NA18942  | [2515685 chr1  | 1  | 103827497 | 103834166 | 6670   | 16  | 0.529997  | 0.034302 | 103827175 | 103827820 | 103833999 | 10383433- |
| 17 NA18942  | [2515685 chr1  | 1  | 103848292 | 103866317 | 18026  | 27  | 0.702766  | 0.007944 | 103842566 | 103851565 | 103865345 | 10386729! |
| 18 NA18942  | [2515685 chr1  | 1  | 103873304 | 104015739 | 142436 | 229 | 0.702766  | 0.007944 | 103873021 | 103873587 | 104013178 | 10401830  |
| 19 NA18942  | [2515685 chr1  | 1  | 104022641 | 104029695 | 7055   | 5   | 0.333038  | 0.064736 | 104022431 | 104022851 | 104028575 | 10403081! |
| 20 NA18942  | [2515685 chr1  | 1  | 105728161 | 105735462 | 7302   | 8   | -4.367331 | 0.132825 | 105727820 | 105728503 | 105734532 | 10573639  |
| 21 NA18942  | [2515685 chr1  | 1  | 108514938 | 108565175 | 50238  | 59  | 0.378978  | 0.019576 | 108514864 | 108515012 | 108565023 | 10856532  |
| 22 NA18942  | [2515685 chr1  | 1  | 108638096 | 108688767 | 50672  | 60  | 0.386129  | 0.019276 | 108637939 | 108638254 | 108688693 | 10868884  |
| 23 NA18942  | [2515685 chr1  | 1  | 109936541 | 109953240 | 16700  | 22  | 0.664965  | 0.031733 | 109935803 | 109937279 | 109952761 | 10995372! |
| 24 NA18942  | [2515685 chr1  | 1  | 109954457 | 109967219 | 12763  | 9   | 0.252474  | 0.050052 | 109954248 | 109954666 | 109966822 | 10996761! |
| 25 NA18942  | [2515685 chr1  | 1  | 120244720 | 120342752 | 98033  | 152 | 0.28404   | 0.011514 | 120243262 | 120246178 | 120342542 | 12034296  |
| 26 NA18942  | [2515685 chr1  | 1  | 141902344 | 141981854 | 79511  | 186 | 0.271162  | 0.009006 | 141902175 | 141902514 | 141978581 | 14203010  |

|            |               |   |           |           |        |     |           |          |           |           |           |          |
|------------|---------------|---|-----------|-----------|--------|-----|-----------|----------|-----------|-----------|-----------|----------|
| 27 NA18942 | [2515685 chr1 | 1 | 142091152 | 142098545 | 7394   | 17  | 0.359158  | 0.031017 | 142091076 | 142091228 | 142098113 | 14209897 |
| 28 NA18942 | [2515685 chr1 | 1 | 142438646 | 142567937 | 129292 | 157 | 0.363275  | 0.011569 | 142438189 | 142439104 | 142567100 | 14256877 |
| 29 NA18942 | [2515685 chr1 | 1 | 142699592 | 142753388 | 53797  | 96  | 0.308021  | 0.015011 | 142699467 | 142699718 | 142753074 | 14275370 |
| 30 NA18942 | [2515685 chr1 | 1 | 145031115 | 145117170 | 86056  | 214 | 0.265875  | 0.008531 | 145030976 | 145031254 | 145116569 | 14511777 |
| 31 NA18942 | [2515685 chr1 | 1 | 145376450 | 145418414 | 41965  | 83  | 0.261446  | 0.013261 | 145375789 | 145377112 | 145418405 | 14541842 |
| 32 NA18942 | [2515685 chr1 | 1 | 145537779 | 145580771 | 42993  | 80  | 0.257694  | 0.013421 | 145537725 | 145537833 | 145580725 | 14558081 |
| 33 NA18942 | [2515685 chr1 | 1 | 145819541 | 145840436 | 20896  | 24  | 0.408372  | 0.031055 | 145819262 | 145819821 | 145840201 | 14584067 |
| 34 NA18942 | [2515685 chr1 | 1 | 145920044 | 145951531 | 31488  | 37  | 0.438605  | 0.024542 | 145919709 | 145920380 | 145951467 | 14595159 |
| 35 NA18942 | [2515685 chr1 | 1 | 146140549 | 146146670 | 6122   | 3   | 0.487293  | 0.070635 | 146092563 | 146143822 | 146146437 | 14614690 |
| 36 NA18942 | [2515685 chr1 | 1 | 146331954 | 146341151 | 9198   | 28  | 0.388187  | 0.022793 | 146331906 | 146332002 | 146341146 | 14634115 |
| 37 NA18942 | [2515685 chr1 | 1 | 146391020 | 146391476 | 457    | 2   | 0.669815  | 0.08658  | 146390812 | 146391228 | 146391229 | 14639172 |
| 38 NA18942 | [2515685 chr1 | 1 | 148998878 | 149005918 | 7041   | 13  | 0.529669  | 0.032335 | 148998401 | 148999355 | 149004680 | 14900715 |
| 39 NA18942 | [2515685 chr1 | 1 | 149368571 | 149385742 | 17172  | 3   | -1.240475 | 0.095393 | 149368105 | 149369038 | 149385339 | 14938614 |
| 40 NA18942 | [2515685 chr1 | 1 | 149385742 | 149399435 | 13694  | 19  | -3.010315 | 0.066062 | 149385339 | 149386145 | 149399080 | 14939979 |
| 41 NA18942 | [2515685 chr1 | 1 | 149573040 | 149583431 | 10392  | 6   | 0.864462  | 0.068163 | 149572621 | 149573460 | 149582912 | 14958395 |
| 42 NA18942 | [2515685 chr1 | 1 | 158224068 | 158225480 | 1413   | 2   | -0.437161 | 0.072308 | 158223552 | 158224584 | 158225276 | 15822568 |
| 43 NA18942 | [2515685 chr1 | 1 | 158231105 | 158232881 | 1777   | 2   | -0.437161 | 0.072308 | 158230227 | 158231984 | 158232676 | 15823308 |
| 44 NA18942 | [2515685 chr1 | 1 | 158245896 | 158247672 | 1777   | 2   | -0.437161 | 0.072308 | 158245018 | 158246775 | 158247467 | 15824787 |
| 45 NA18942 | [2515685 chr1 | 1 | 158253277 | 158255053 | 1777   | 2   | -0.437161 | 0.072308 | 158252398 | 158254156 | 158254848 | 15825525 |
| 46 NA18942 | [2515685 chr1 | 1 | 171527310 | 171533429 | 6120   | 6   | -2.914753 | 0.111635 | 171526198 | 171528423 | 171533245 | 17153361 |
| 47 NA18942 | [2515685 chr1 | 1 | 186349430 | 186351478 | 2049   | 3   | -0.465675 | 0.08898  | 186349152 | 186349708 | 186351036 | 18635192 |
| 48 NA18942 | [2515685 chr1 | 1 | 192541700 | 192547982 | 6283   | 3   | -0.479237 | 0.081067 | 192541312 | 192542088 | 192547786 | 19254817 |
| 49 NA18942 | [2515685 chr1 | 1 | 193506114 | 193507124 | 1011   | 2   | -1.244492 | 0.114315 | 193505891 | 193506337 | 193506764 | 19350748 |
| 50 NA18942 | [2515685 chr1 | 1 | 193532654 | 193541556 | 8903   | 5   | -0.33242  | 0.06325  | 193532443 | 193532865 | 193540241 | 19354287 |
| 51 NA18942 | [2515685 chr1 | 1 | 218762650 | 218768272 | 5623   | 6   | 0.486744  | 0.061377 | 218762212 | 218763089 | 218767017 | 21876952 |
| 52 NA18942 | [2515685 chr1 | 1 | 221978898 | 221980991 | 2094   | 2   | 0.528758  | 0.095638 | 221978148 | 221979648 | 221980441 | 22198154 |
| 53 NA18942 | [2515685 chr1 | 1 | 233202665 | 233204956 | 2292   | 42  | -0.317409 | 0.018736 | 233202312 | 233203018 | 233204364 | 23320554 |
| 54 NA18942 | [2515685 chr1 | 1 | 236719047 | 236720968 | 1922   | 3   | -0.949282 | 0.087954 | 236718751 | 236719344 | 236720749 | 23672118 |
| 55 NA18942 | [2515685 chr1 | 1 | 239368545 | 239481887 | 113343 | 13  | -0.439659 | 0.0413   | 239368239 | 239368851 | 239478614 | 23949135 |
| 56 NA18942 | [2515685 chr2 | 2 | 388500    | 390704    | 2205   | 6   | -0.688865 | 0.061625 | 387915    | 389086    | 390173    | 391236   |
| 57 NA18942 | [2515685 chr2 | 2 | 13477201  | 13505768  | 28568  | 31  | 0.274192  | 0.017171 | 13476896  | 13477506  | 13505533  | 1350600  |
| 58 NA18942 | [2515685 chr2 | 2 | 13508038  | 13516059  | 8022   | 8   | 0.274192  | 0.017171 | 13507783  | 13508293  | 13512022  | 1351901  |
| 59 NA18942 | [2515685 chr2 | 2 | 13531646  | 13548616  | 16971  | 17  | 0.274192  | 0.017171 | 13530427  | 13532866  | 13548319  | 1354891  |
| 60 NA18942 | [2515685 chr2 | 2 | 14632502  | 14635533  | 3032   | 2   | -0.512907 | 0.091386 | 14632427  | 14632577  | 14634482  | 1463658  |
| 61 NA18942 | [2515685 chr2 | 2 | 34607369  | 34644771  | 37403  | 38  | 0.800596  | 0.025477 | 34601818  | 34610328  | 34641812  | 3464839  |
| 62 NA18942 | [2515685 chr2 | 2 | 35781174  | 35797517  | 16344  | 10  | -0.270751 | 0.044965 | 35780959  | 35781390  | 35797295  | 3579774  |
| 63 NA18942 | [2515685 chr2 | 2 | 35896471  | 35905938  | 9468   | 3   | -0.92441  | 0.088615 | 35879425  | 35899430  | 35902979  | 3590982  |
| 64 NA18942 | [2515685 chr2 | 2 | 35962678  | 35963578  | 901    | 2   | -0.765581 | 0.125087 | 35962370  | 35962986  | 35963398  | 3596375  |
| 65 NA18942 | [2515685 chr2 | 2 | 36245925  | 36253915  | 7991   | 4   | -0.944032 | 0.082739 | 36243469  | 36248382  | 36250956  | 3625755  |
| 66 NA18942 | [2515685 chr2 | 2 | 36300730  | 36301664  | 935    | 2   | -0.67604  | 0.121641 | 36300432  | 36301028  | 36301462  | 3630186  |
| 67 NA18942 | [2515685 chr2 | 2 | 46605650  | 46609015  | 3366   | 4   | -0.696439 | 0.087949 | 46605255  | 46606046  | 46608607  | 4660942  |
| 68 NA18942 | [2515685 chr2 | 2 | 52661573  | 52696869  | 35297  | 26  | -0.98584  | 0.031662 | 52661218  | 52661928  | 52696416  | 5269732  |
| 69 NA18942 | [2515685 chr2 | 2 | 75296507  | 75298934  | 2428   | 2   | 0.542639  | 0.104507 | 75296056  | 75296959  | 75298532  | 7529933  |
| 70 NA18942 | [2515685 chr2 | 2 | 80715237  | 80716876  | 1640   | 2   | -0.465891 | 0.092915 | 80714646  | 80715829  | 80716511  | 8071724  |
| 71 NA18942 | [2515685 chr2 | 2 | 87981677  | 88064964  | 83288  | 7   | 0.476532  | 0.057358 | 87965922  | 87984636  | 88062005  | 8807338  |
| 72 NA18942 | [2515685 chr2 | 2 | 88121358  | 88126839  | 5482   | 9   | 0.29558   | 0.047683 | 88121177  | 88121539  | 88126458  | 8812722  |
| 73 NA18942 | [2515685 chr2 | 2 | 97184386  | 97189741  | 5356   | 2   | -0.73781  | 0.102484 | 97182781  | 97185992  | 97186782  | 9719672  |
| 74 NA18942 | [2515685 chr2 | 2 | 106338419 | 106344320 | 5902   | 7   | -0.555901 | 0.063204 | 106337769 | 106339069 | 106344055 | 10634458 |
| 75 NA18942 | [2515685 chr2 | 2 | 108313968 | 108314875 | 908    | 2   | 0.704926  | 0.114554 | 108313664 | 108314272 | 108314680 | 10831507 |
| 76 NA18942 | [2515685 chr2 | 2 | 110045666 | 110088603 | 42938  | 47  | 0.256189  | 0.020056 | 110045166 | 110046166 | 110088459 | 11008874 |
| 77 NA18942 | [2515685 chr2 | 2 | 110590037 | 110632991 | 42955  | 39  | 0.257834  | 0.021701 | 110589893 | 110590182 | 110632491 | 11063349 |
| 78 NA18942 | [2515685 chr2 | 2 | 126159437 | 126168349 | 8913   | 3   | -3.644332 | 0.162221 | 126158494 | 126160381 | 126168048 | 12616865 |
| 79 NA18942 | [2515685 chr2 | 2 | 130410671 | 130434636 | 23966  | 16  | -0.361812 | 0.037536 | 130410236 | 130411106 | 130434351 | 13043492 |
| 80 NA18942 | [2515685 chr2 | 2 | 146694139 | 146710744 | 16606  | 17  | 0.815158  | 0.040809 | 146688620 | 146697098 | 146710557 | 14671093 |
| 81 NA18942 | [2515685 chr2 | 2 | 153622711 | 153625256 | 2546   | 3   | 0.841546  | 0.094998 | 153621175 | 153624247 | 153625088 | 15362542 |

|             |               |   |           |           |        |     |           |          |           |           |            |          |
|-------------|---------------|---|-----------|-----------|--------|-----|-----------|----------|-----------|-----------|------------|----------|
| 82 NA18942  | [2515685 chr2 | 2 | 208176479 | 208184457 | 7979   | 7   | 0.871727  | 0.060721 | 208176093 | 208176865 | 208183930  | 20818498 |
| 83 NA18942  | [2515685 chr2 | 2 | 241153460 | 241234030 | 80571  | 67  | 0.398571  | 0.017755 | 241141812 | 241156419 | 241233604  | 24123445 |
| 84 NA18942  | [2515685 chr2 | 2 | 242664580 | 242668683 | 4104   | 10  | 1.38713   | 0.041631 | 242664284 | 242664877 | 242668532  | 24266883 |
| 85 NA18942  | [2515685 chr3 | 3 | 1757211   | 1765712   | 8502   | 2   | 0.91988   | 0.118031 | 1756096   | 1758327   | 1762058    | 1797300  |
| 86 NA18942  | [2515685 chr3 | 3 | 41574298  | 41578539  | 4242   | 2   | -0.810765 | 0.116148 | 41573753  | 41574843  | 41575292   | 41581781 |
| 87 NA18942  | [2515685 chr3 | 3 | 50888459  | 50888513  | 55     | 2   | 0.735571  | 0.11019  | 50888445  | 50888474  | 50888495   | 5088853  |
| 88 NA18942  | [2515685 chr3 | 3 | 133191392 | 133196576 | 5185   | 5   | -0.869607 | 0.065088 | 133190820 | 133191965 | 133195824  | 13319732 |
| 89 NA18942  | [2515685 chr3 | 3 | 139287057 | 139289507 | 2451   | 3   | 0.980129  | 0.114343 | 139286041 | 139288073 | 139289200  | 13928981 |
| 90 NA18942  | [2515685 chr3 | 3 | 156042614 | 156043843 | 1230   | 2   | -0.651009 | 0.111429 | 156042074 | 156043154 | 156043483  | 15604420 |
| 91 NA18942  | [2515685 chr3 | 3 | 163695625 | 163718089 | 22465  | 23  | -0.976782 | 0.035362 | 163692969 | 163698282 | 1637117674 | 16371850 |
| 92 NA18942  | [2515685 chr3 | 3 | 163994430 | 164008330 | 13901  | 18  | 2.493887  | 0.031115 | 163993067 | 163995793 | 164008010  | 16400865 |
| 93 NA18942  | [2515685 chr3 | 3 | 164031309 | 164106083 | 74775  | 68  | 2.493887  | 0.031115 | 164027655 | 164036948 | 164105649  | 16410651 |
| 94 NA18942  | [2515685 chr3 | 3 | 164106083 | 164108502 | 2420   | 2   | 0.579271  | 0.113708 | 164105649 | 164106517 | 164108018  | 16410898 |
| 95 NA18942  | [2515685 chr3 | 3 | 164199936 | 164205886 | 5951   | 6   | -0.868534 | 0.072682 | 164199686 | 164200187 | 164204674  | 16420709 |
| 96 NA18942  | [2515685 chr3 | 3 | 190846156 | 190852181 | 6026   | 4   | -1.051758 | 0.080122 | 190845504 | 190846809 | 190850598  | 19085376 |
| 97 NA18942  | [2515685 chr3 | 3 | 191219813 | 191223326 | 3514   | 4   | 0.799331  | 0.076246 | 191219291 | 191220336 | 191222918  | 19122373 |
| 98 NA18942  | [2515685 chr3 | 3 | 192547312 | 192554331 | 7020   | 10  | 0.944361  | 0.053122 | 192546950 | 192547674 | 192554127  | 19255453 |
| 99 NA18942  | [2515685 chr3 | 3 | 196679304 | 196713768 | 34465  | 36  | 0.590075  | 0.020418 | 196677636 | 196680972 | 196711768  | 19671576 |
| 100 NA18942 | [2515685 chr3 | 3 | 196943833 | 196965802 | 21970  | 18  | -0.453531 | 0.034727 | 196943538 | 196944128 | 196965494  | 19696611 |
| 101 NA18942 | [2515685 chr3 | 3 | 196994475 | 197002965 | 8491   | 10  | 0.723235  | 0.046046 | 196994054 | 196994896 | 197002044  | 19700388 |
| 102 NA18942 | [2515685 chr3 | 3 | 198043467 | 198046340 | 2874   | 4   | 0.512544  | 0.067735 | 198043278 | 198043657 | 198045914  | 19804676 |
| 103 NA18942 | [2515685 chr3 | 3 | 198422794 | 198427408 | 4615   | 2   | 1.023909  | 0.124641 | 198422381 | 198423207 | 198423959  | 19843085 |
| 104 NA18942 | [2515685 chr3 | 3 | 198674426 | 198675470 | 1045   | 6   | -0.526267 | 0.053355 | 198674161 | 198674692 | 198674903  | 19867603 |
| 105 NA18942 | [2515685 chr3 | 3 | 199313925 | 199321616 | 7692   | 16  | -0.559557 | 0.030542 | 199313515 | 199314336 | 199321283  | 19932194 |
| 106 NA18942 | [2515685 chr4 | 4 | 8998171   | 9046719   | 48549  | 87  | 0.389136  | 0.011485 | 8850774   | 9001243   | 9046129    | 9047305  |
| 107 NA18942 | [2515685 chr4 | 4 | 9812346   | 9813108   | 763    | 33  | 1.026686  | 0.020576 | 9812284   | 9812408   | 9812952    | 9813265  |
| 108 NA18942 | [2515685 chr4 | 4 | 9887220   | 9911397   | 24178  | 31  | 2.316989  | 0.046244 | 9886886   | 9887555   | 9910388    | 9912407  |
| 109 NA18942 | [2515685 chr4 | 4 | 34602797  | 34650994  | 48198  | 45  | 0.826611  | 0.024275 | 34601994  | 34603600  | 34649535   | 3465245  |
| 110 NA18942 | [2515685 chr4 | 4 | 40593181  | 40602523  | 9343   | 2   | 0.553538  | 0.109749 | 40590540  | 40595822  | 40599451   | 4061064  |
| 111 NA18942 | [2515685 chr4 | 4 | 58000242  | 58001412  | 1171   | 2   | -0.538876 | 0.097758 | 57999935  | 58000550  | 58000984   | 5800184  |
| 112 NA18942 | [2515685 chr4 | 4 | 63500368  | 63504889  | 4522   | 5   | -1.07981  | 0.083668 | 63494261  | 63503440  | 63504639   | 6350514  |
| 113 NA18942 | [2515685 chr4 | 4 | 64522941  | 64543857  | 20917  | 20  | -0.926348 | 0.038409 | 64522682  | 64523201  | 64542552   | 6454516  |
| 114 NA18942 | [2515685 chr4 | 4 | 70305618  | 70418701  | 113084 | 113 | 0.455368  | 0.014335 | 70305512  | 70305724  | 70418467   | 7041893  |
| 115 NA18942 | [2515685 chr4 | 4 | 115865203 | 115869487 | 4285   | 3   | -0.914863 | 0.100373 | 115864913 | 115865494 | 115866415  | 11587556 |
| 116 NA18942 | [2515685 chr4 | 4 | 125304905 | 125306512 | 1608   | 3   | 0.540216  | 0.087415 | 125304587 | 125305223 | 125306235  | 12530678 |
| 117 NA18942 | [2515685 chr4 | 4 | 133536186 | 133540723 | 4538   | 3   | -2.415438 | 0.156532 | 133531398 | 133539258 | 133540462  | 13354098 |
| 118 NA18942 | [2515685 chr4 | 4 | 138537751 | 138549906 | 12156  | 14  | 0.890864  | 0.045268 | 138537443 | 138538059 | 138547414  | 13855239 |
| 119 NA18942 | [2515685 chr4 | 4 | 145013091 | 145017379 | 4289   | 4   | 0.527192  | 0.080312 | 145010831 | 145015351 | 145017113  | 14501764 |
| 120 NA18942 | [2515685 chr4 | 4 | 145240980 | 145245588 | 4609   | 4   | -0.786053 | 0.088386 | 145240473 | 145241488 | 145245192  | 14524598 |
| 121 NA18942 | [2515685 chr4 | 4 | 161371184 | 161377067 | 5884   | 10  | -0.966034 | 0.052146 | 161370737 | 161371632 | 161376564  | 16137757 |
| 122 NA18942 | [2515685 chr4 | 4 | 162217911 | 162289219 | 71309  | 70  | 0.958489  | 0.01897  | 162216641 | 162219182 | 162288939  | 16228949 |
| 123 NA18942 | [2515685 chr4 | 4 | 162312826 | 162313795 | 970    | 2   | 0.684522  | 0.117516 | 162312706 | 162312947 | 162313453  | 16231413 |
| 124 NA18942 | [2515685 chr4 | 4 | 162806038 | 162809269 | 3232   | 3   | 0.817967  | 0.084461 | 162804872 | 162807204 | 162808734  | 16280980 |
| 125 NA18942 | [2515685 chr4 | 4 | 169183401 | 169368370 | 184970 | 161 | 0.82114   | 0.012425 | 169182712 | 169184090 | 169366713  | 16937002 |
| 126 NA18942 | [2515685 chr4 | 4 | 173799832 | 173807327 | 7496   | 6   | -3.571667 | 0.146854 | 173799464 | 173800201 | 173804255  | 17381134 |
| 127 NA18942 | [2515685 chr4 | 4 | 178581358 | 178591479 | 10122  | 7   | -0.964094 | 0.067534 | 178578974 | 178583742 | 178591109  | 17859184 |
| 128 NA18942 | [2515685 chr4 | 4 | 183944886 | 183947025 | 2140   | 3   | -1.103351 | 0.088556 | 183944291 | 183945482 | 183946755  | 18394729 |
| 129 NA18942 | [2515685 chr4 | 4 | 185533276 | 185544849 | 11574  | 11  | 0.896972  | 0.048005 | 185532696 | 185533857 | 185543276  | 18554642 |
| 130 NA18942 | [2515685 chr4 | 4 | 187728494 | 187732907 | 4414   | 15  | 3.111218  | 0.06708  | 187728193 | 187728795 | 187732541  | 18773327 |
| 131 NA18942 | [2515685 chr4 | 4 | 188255523 | 188269680 | 14158  | 235 | 0.885973  | 0.009154 | 188255215 | 188255831 | 188269403  | 18826995 |
| 132 NA18942 | [2515685 chr4 | 4 | 190528602 | 190533163 | 4562   | 21  | -0.686931 | 0.032651 | 190528058 | 190529146 | 190531664  | 19053466 |
| 133 NA18942 | [2515685 chr4 | 4 | 190845771 | 191040778 | 195008 | 206 | 0.270446  | 0.010002 | 190845056 | 190846486 | 191037706  | 19104596 |
| 134 NA18942 | [2515685 chr5 | 5 | 520743    | 521684    | 942    | 5   | 1.073173  | 0.078963 | 520428    | 521059    | 521427     | 521942   |
| 135 NA18942 | [2515685 chr5 | 5 | 1075284   | 1079920   | 4637   | 24  | 0.738242  | 0.028865 | 1074709   | 1075859   | 1079566    | 1080275  |
| 136 NA18942 | [2515685 chr5 | 5 | 1223248   | 1223930   | 683    | 5   | 1.48889   | 0.06672  | 1223057   | 1223439   | 1223854    | 1224007  |

|             |               |   |           |           |        |     |           |          |           |           |           |           |
|-------------|---------------|---|-----------|-----------|--------|-----|-----------|----------|-----------|-----------|-----------|-----------|
| 137 NA18942 | [2515685 chr5 | 5 | 19410747  | 19412172  | 1426   | 3   | 0.736827  | 0.085535 | 19410189  | 19411305  | 19411980  | 1941236!  |
| 138 NA18942 | [2515685 chr5 | 5 | 21483394  | 21488147  | 4754   | 4   | -3.606038 | 0.139537 | 21480817  | 21485972  | 21487855  | 2148843!  |
| 139 NA18942 | [2515685 chr5 | 5 | 21971730  | 22049242  | 77513  | 119 | 0.255376  | 0.012093 | 21971258  | 21972202  | 22048833  | 2204965!  |
| 140 NA18942 | [2515685 chr5 | 5 | 57336601  | 57348961  | 12361  | 4   | -0.43197  | 0.078088 | 57313240  | 57339800  | 57348456  | 5734946!  |
| 141 NA18942 | [2515685 chr5 | 5 | 57359558  | 57369858  | 10301  | 9   | 3.213233  | 0.092487 | 57359213  | 57359904  | 57367789  | 5737192!  |
| 142 NA18942 | [2515685 chr5 | 5 | 68865200  | 68886836  | 21637  | 45  | 0.743153  | 0.023316 | 68864770  | 68865630  | 68886492  | 6888718!  |
| 143 NA18942 | [2515685 chr5 | 5 | 69269791  | 69510718  | 240928 | 386 | 0.298754  | 0.00598  | 69269490  | 69270092  | 69510624  | 6951081!  |
| 144 NA18942 | [2515685 chr5 | 5 | 69974791  | 69976828  | 2038   | 6   | 0.387812  | 0.041747 | 69974756  | 69974826  | 69976597  | 6997706!  |
| 145 NA18942 | [2515685 chr5 | 5 | 70144831  | 70233663  | 88833  | 141 | 0.277419  | 0.009692 | 70144530  | 70145132  | 70233369  | 7023395!  |
| 146 NA18942 | [2515685 chr5 | 5 | 70234358  | 70286789  | 52432  | 51  | 0.455354  | 0.016348 | 70233958  | 70234758  | 70286122  | 7028745!  |
| 147 NA18942 | [2515685 chr5 | 5 | 70403953  | 70426554  | 22602  | 43  | 0.791991  | 0.023837 | 70403337  | 70404569  | 70425419  | 7042768!  |
| 148 NA18942 | [2515685 chr5 | 5 | 70461994  | 70511908  | 49915  | 101 | 0.304436  | 0.011804 | 70461956  | 70462032  | 70511607  | 7051221!  |
| 149 NA18942 | [2515685 chr5 | 5 | 79992681  | 79999566  | 6886   | 7   | 0.325581  | 0.060282 | 79992202  | 79993161  | 79998428  | 8000070!  |
| 150 NA18942 | [2515685 chr5 | 5 | 81459206  | 81466062  | 6857   | 2   | -1.529019 | 0.12319  | 81455614  | 81462405  | 81462863  | 8147028!  |
| 151 NA18942 | [2515685 chr5 | 5 | 97427204  | 97428353  | 1150   | 2   | 0.901946  | 0.11734  | 97426913  | 97427496  | 97428177  | 9742852!  |
| 152 NA18942 | [2515685 chr5 | 5 | 98692416  | 98694362  | 1947   | 3   | 0.581411  | 0.08314  | 98691745  | 98693087  | 98694014  | 9869471!  |
| 153 NA18942 | [2515685 chr5 | 5 | 98867127  | 98870861  | 3735   | 2   | -1.665763 | 0.161839 | 98864129  | 98870125  | 98870667  | 9887105!  |
| 154 NA18942 | [2515685 chr5 | 5 | 99409393  | 99419037  | 9645   | 13  | -0.45464  | 0.041222 | 99408997  | 99409789  | 99418328  | 9941974!  |
| 155 NA18942 | [2515685 chr5 | 5 | 137834875 | 137844134 | 9260   | 8   | 0.68775   | 0.057935 | 137834139 | 137835611 | 137843310 | 13784495! |
| 156 NA18942 | [2515685 chr5 | 5 | 140203081 | 140218928 | 15848  | 20  | 2.336883  | 0.055741 | 140202344 | 140203819 | 140218508 | 14021934! |
| 157 NA18942 | [2515685 chr5 | 5 | 140534849 | 140540106 | 5258   | 5   | 0.491923  | 0.067092 | 140534700 | 140534999 | 140539007 | 14054120! |
| 158 NA18942 | [2515685 chr5 | 5 | 150157909 | 150161837 | 3929   | 6   | -0.999148 | 0.070937 | 150157286 | 150158532 | 150161621 | 15016205! |
| 159 NA18942 | [2515685 chr5 | 5 | 150183322 | 150203801 | 20480  | 11  | -0.789558 | 0.04833  | 150181427 | 150185218 | 150203451 | 15020415! |
| 160 NA18942 | [2515685 chr5 | 5 | 180309823 | 180363417 | 53595  | 51  | 0.632097  | 0.021548 | 180309690 | 180309956 | 180363120 | 18036371! |
| 161 NA18942 | [2515685 chr6 | 6 | 29607035  | 29608790  | 1756   | 2   | -0.606509 | 0.108811 | 29606739  | 29607332  | 29608263  | 2960931!  |
| 162 NA18942 | [2515685 chr6 | 6 | 29973305  | 29978265  | 4961   | 3   | 0.492954  | 0.075482 | 29972995  | 29973615  | 29976044  | 2998048!  |
| 163 NA18942 | [2515685 chr6 | 6 | 29993500  | 29999266  | 5767   | 4   | -0.676629 | 0.09622  | 29992800  | 29994200  | 29998037  | 3000049!  |
| 164 NA18942 | [2515685 chr6 | 6 | 30063619  | 30064799  | 1181   | 2   | 0.6927    | 0.103649 | 30063441  | 30063797  | 30064536  | 3006506!  |
| 165 NA18942 | [2515685 chr6 | 6 | 31383567  | 31386100  | 2534   | 3   | -0.964432 | 0.100659 | 31383185  | 31383949  | 31385806  | 3138639!  |
| 166 NA18942 | [2515685 chr6 | 6 | 32466735  | 32477058  | 10324  | 8   | -0.407163 | 0.051126 | 32465721  | 32467750  | 32467327  | 3247779!  |
| 167 NA18942 | [2515685 chr6 | 6 | 32538780  | 32547042  | 8263   | 4   | -0.403314 | 0.075102 | 32538477  | 32539084  | 32546557  | 3254752!  |
| 168 NA18942 | [2515685 chr6 | 6 | 32561866  | 32586862  | 24997  | 6   | -0.740102 | 0.111739 | 32560230  | 32563503  | 32586127  | 3258759!  |
| 169 NA18942 | [2515685 chr6 | 6 | 32589957  | 32591649  | 1693   | 3   | -0.483136 | 0.087392 | 32589338  | 32590576  | 32591403  | 3259189!  |
| 170 NA18942 | [2515685 chr6 | 6 | 32605125  | 32605958  | 834    | 2   | -0.932924 | 0.125377 | 32604923  | 32605328  | 32605760  | 3260615!  |
| 171 NA18942 | [2515685 chr6 | 6 | 32631127  | 32632349  | 1223   | 2   | -0.673183 | 0.127458 | 32630911  | 32631343  | 32632089  | 3263261!  |
| 172 NA18942 | [2515685 chr6 | 6 | 32653862  | 32655482  | 1621   | 3   | 1.396915  | 0.142297 | 32653679  | 32654046  | 32654980  | 3265598!  |
| 173 NA18942 | [2515685 chr6 | 6 | 32666229  | 32667673  | 1445   | 3   | 0.671704  | 0.084553 | 32665899  | 32666560  | 32667507  | 3266783!  |
| 174 NA18942 | [2515685 chr6 | 6 | 32678696  | 32680751  | 2056   | 3   | 0.692753  | 0.09495  | 32678507  | 32678885  | 32680547  | 3268095!  |
| 175 NA18942 | [2515685 chr6 | 6 | 32702716  | 32707706  | 4991   | 4   | -0.481238 | 0.067703 | 32702285  | 32703148  | 32707455  | 3270795!  |
| 176 NA18942 | [2515685 chr6 | 6 | 54036900  | 54042384  | 5485   | 5   | 3.864399  | 0.162422 | 54036573  | 54037227  | 54041771  | 5404299!  |
| 177 NA18942 | [2515685 chr6 | 6 | 63656044  | 63658372  | 2329   | 3   | -0.74678  | 0.084629 | 63655444  | 63656644  | 63658061  | 6365868!  |
| 178 NA18942 | [2515685 chr6 | 6 | 66455162  | 66462038  | 6877   | 5   | -3.097731 | 0.131227 | 66454046  | 66456278  | 66461410  | 6646266!  |
| 179 NA18942 | [2515685 chr6 | 6 | 77495034  | 77513522  | 18489  | 12  | 0.792084  | 0.047335 | 77493568  | 77496500  | 77510011  | 7751769!  |
| 180 NA18942 | [2515685 chr6 | 6 | 79023318  | 79093263  | 69946  | 70  | 0.798083  | 0.019033 | 79022028  | 79024609  | 79091909  | 7909461!  |
| 181 NA18942 | [2515685 chr6 | 6 | 81356028  | 81360364  | 4337   | 6   | -0.977629 | 0.06565  | 81355797  | 81356260  | 81360134  | 8136059!  |
| 182 NA18942 | [2515685 chr6 | 6 | 103844685 | 103871201 | 26517  | 17  | 2.557968  | 0.074855 | 103844347 | 103845023 | 103868241 | 10387416! |
| 183 NA18942 | [2515685 chr6 | 6 | 114803933 | 114805355 | 1423   | 2   | 0.478463  | 0.09488  | 114803526 | 114804340 | 114805080 | 11480563! |
| 184 NA18942 | [2515685 chr6 | 6 | 115492959 | 115494541 | 1583   | 2   | 1.151491  | 0.130198 | 115492698 | 115493240 | 115494140 | 11549494! |
| 185 NA18942 | [2515685 chr6 | 6 | 120671191 | 120671916 | 726    | 2   | 1.017182  | 0.113233 | 120670676 | 120671686 | 120671725 | 12067210! |
| 186 NA18942 | [2515685 chr6 | 6 | 143949218 | 143952380 | 3163   | 2   | 0.690314  | 0.123765 | 143948651 | 143949786 | 143951280 | 14395348! |
| 187 NA18942 | [2515685 chr6 | 6 | 143998763 | 144001320 | 2558   | 2   | 0.755023  | 0.10433  | 143997938 | 143999589 | 144000924 | 14400171! |
| 188 NA18942 | [2515685 chr6 | 6 | 161001907 | 161038394 | 36488  | 61  | 0.54142   | 0.013819 | 161001167 | 161002648 | 161038184 | 16103860! |
| 189 NA18942 | [2515685 chr6 | 6 | 162821530 | 162823040 | 1511   | 2   | -0.583327 | 0.101328 | 162821109 | 162821951 | 162822743 | 16282333! |
| 190 NA18942 | [2515685 chr6 | 6 | 170603879 | 170604666 | 788    | 2   | -1.640821 | 0.115687 | 170603541 | 170604217 | 170604339 | 17060499! |
| 191 NA18942 | [2515685 chr7 | 7 | 928371    | 930663    | 2293   | 6   | 0.540886  | 0.060361 | 928117    | 928626    | 930382    | 930945!   |



|             |               |   |           |           |        |     |           |          |           |           |           |           |
|-------------|---------------|---|-----------|-----------|--------|-----|-----------|----------|-----------|-----------|-----------|-----------|
| 192 NA18942 | [2515685 chr7 | 7 | 3215892   | 3243170   | 27279  | 33  | 0.565964  | 0.026499 | 3215493   | 3216292   | 3242820   | 3243520   |
| 193 NA18942 | [2515685 chr7 | 7 | 3384111   | 3392461   | 8351   | 8   | 0.905168  | 0.057419 | 3383451   | 3384772   | 3390107   | 3395611   |
| 194 NA18942 | [2515685 chr7 | 7 | 43774540  | 43856045  | 81506  | 109 | 0.433564  | 0.012134 | 43774344  | 43774737  | 43853730  | 43858361  |
| 195 NA18942 | [2515685 chr7 | 7 | 51954033  | 52682888  | 728856 | 10  | -0.259641 | 0.044868 | 51807710  | 51956387  | 52680534  | 5281088:  |
| 196 NA18942 | [2515685 chr7 | 7 | 53752918  | 53757548  | 4631   | 6   | -0.309497 | 0.060205 | 53752626  | 53753211  | 53757371  | 53757721  |
| 197 NA18942 | [2515685 chr7 | 7 | 63995985  | 64009675  | 13691  | 17  | 0.344662  | 0.035998 | 63995676  | 63996294  | 64009043  | 6401030:  |
| 198 NA18942 | [2515685 chr7 | 7 | 64029672  | 64045487  | 15816  | 44  | -0.287848 | 0.02119  | 64029291  | 64030053  | 64045069  | 64045901  |
| 199 NA18942 | [2515685 chr7 | 7 | 64162316  | 64165371  | 3056   | 2   | 0.783911  | 0.130851 | 64160143  | 64164489  | 64165089  | 6416565:  |
| 200 NA18942 | [2515685 chr7 | 7 | 64464087  | 64481591  | 17505  | 45  | -0.268438 | 0.020889 | 64463669  | 64464506  | 64481417  | 6448176:  |
| 201 NA18942 | [2515685 chr7 | 7 | 64538610  | 64556662  | 18053  | 47  | -0.261231 | 0.020138 | 64537873  | 64539348  | 64556244  | 64557081  |
| 202 NA18942 | [2515685 chr7 | 7 | 64690171  | 64725545  | 35375  | 39  | 0.419083  | 0.022583 | 64689761  | 64690582  | 64725209  | 6472588:  |
| 203 NA18942 | [2515685 chr7 | 7 | 66185764  | 66207769  | 22006  | 42  | 0.28282   | 0.017893 | 66185376  | 66186152  | 66206727  | 6620881:  |
| 204 NA18942 | [2515685 chr7 | 7 | 71775031  | 71788013  | 12983  | 30  | 0.307359  | 0.022127 | 71773381  | 71776681  | 71776589  | 7178843:  |
| 205 NA18942 | [2515685 chr7 | 7 | 73698894  | 73700080  | 1187   | 3   | 0.419395  | 0.083045 | 73698686  | 73699103  | 73699523  | 7370063:  |
| 206 NA18942 | [2515685 chr7 | 7 | 73917034  | 73918196  | 1163   | 2   | 1.128458  | 0.101108 | 73917029  | 73917040  | 73917270  | 7391912:  |
| 207 NA18942 | [2515685 chr7 | 7 | 73965656  | 73966691  | 1036   | 4   | 0.429658  | 0.071363 | 73965279  | 73966033  | 73966513  | 73966871  |
| 208 NA18942 | [2515685 chr7 | 7 | 74417518  | 74418680  | 1163   | 2   | 1.128458  | 0.101108 | 74416593  | 74418444  | 74418675  | 74418681  |
| 209 NA18942 | [2515685 chr7 | 7 | 74766333  | 74784981  | 18649  | 43  | 0.300617  | 0.018785 | 74766323  | 74766343  | 74784968  | 7478499:  |
| 210 NA18942 | [2515685 chr7 | 7 | 75798168  | 75817178  | 19011  | 42  | 0.296085  | 0.018233 | 75797734  | 75798602  | 75817169  | 7581718:  |
| 211 NA18942 | [2515685 chr7 | 7 | 92971481  | 92976895  | 5415   | 4   | 0.78564   | 0.086167 | 92971060  | 92971903  | 92975569  | 9297822:  |
| 212 NA18942 | [2515685 chr7 | 7 | 101569778 | 101591961 | 22184  | 47  | 0.28739   | 0.017637 | 101569535 | 101570022 | 101591559 | 10159236  |
| 213 NA18942 | [2515685 chr7 | 7 | 101706881 | 101925433 | 218553 | 311 | 0.468211  | 0.006704 | 101690888 | 101709235 | 101924670 | 10192619  |
| 214 NA18942 | [2515685 chr7 | 7 | 109034780 | 109048749 | 13970  | 10  | 2.739753  | 0.079375 | 109024063 | 109037134 | 109046953 | 10905054  |
| 215 NA18942 | [2515685 chr7 | 7 | 133245202 | 133257363 | 12162  | 13  | 2.636164  | 0.07878  | 133244207 | 133246197 | 133255009 | 13326093  |
| 216 NA18942 | [2515685 chr7 | 7 | 141495319 | 141505136 | 9818   | 12  | -0.439622 | 0.039973 | 141494721 | 141495918 | 141504428 | 14150584  |
| 217 NA18942 | [2515685 chr7 | 7 | 141505136 | 141521152 | 16017  | 19  | -1.740941 | 0.052183 | 141504428 | 141505844 | 141520892 | 14152141: |
| 218 NA18942 | [2515685 chr7 | 7 | 141521152 | 141526577 | 5426   | 9   | -0.418418 | 0.044354 | 141520892 | 141521412 | 141526109 | 14152704  |
| 219 NA18942 | [2515685 chr7 | 7 | 141960848 | 141991871 | 31024  | 37  | -0.370592 | 0.024001 | 141960004 | 141961693 | 141991092 | 14199265  |
| 220 NA18942 | [2515685 chr7 | 7 | 142936330 | 142944772 | 8443   | 12  | 0.359041  | 0.041333 | 142936028 | 142936632 | 142944596 | 14294494  |
| 221 NA18942 | [2515685 chr7 | 7 | 143257273 | 143259025 | 1753   | 2   | -0.573368 | 0.111646 | 143256987 | 143257560 | 143258671 | 14325938  |
| 222 NA18942 | [2515685 chr7 | 7 | 143346673 | 143348067 | 1395   | 5   | -1.89257  | 0.078324 | 143346643 | 143346704 | 143347806 | 14334832  |
| 223 NA18942 | [2515685 chr7 | 7 | 143472403 | 143473797 | 1395   | 5   | -1.892565 | 0.078324 | 143472142 | 143472664 | 143473766 | 14347382  |
| 224 NA18942 | [2515685 chr7 | 7 | 148987797 | 149303127 | 315331 | 339 | 0.312756  | 0.007991 | 148987435 | 148988160 | 149302630 | 14930362  |
| 225 NA18942 | [2515685 chr7 | 7 | 152921169 | 153246240 | 325072 | 350 | 0.334973  | 0.007886 | 152920786 | 152921552 | 153245987 | 15324649  |
| 226 NA18942 | [2515685 chr7 | 7 | 155886350 | 155893882 | 7533   | 5   | -0.624067 | 0.06655  | 155885986 | 155886714 | 155893433 | 15589433  |
| 227 NA18942 | [2515685 chr7 | 7 | 156939035 | 156942423 | 3389   | 5   | -0.97824  | 0.06006  | 156938932 | 156939138 | 156941474 | 15694337  |
| 228 NA18942 | [2515685 chr7 | 7 | 157017083 | 157018249 | 1167   | 2   | 0.649716  | 0.116696 | 157016604 | 157017563 | 157017820 | 15701867  |
| 229 NA18942 | [2515685 chr7 | 7 | 157023614 | 157027930 | 4317   | 7   | 0.374784  | 0.054902 | 157023242 | 157023987 | 157027451 | 15702840  |
| 230 NA18942 | [2515685 chr7 | 7 | 158617060 | 158624382 | 7323   | 6   | 1.002098  | 0.068943 | 158616763 | 158617357 | 158622028 | 15862673  |
| 231 NA18942 | [2515685 chr8 | 8 | 1328256   | 1343509   | 15254  | 45  | -0.560924 | 0.019305 | 1327688   | 1328824   | 1342795   | 134422:   |
| 232 NA18942 | [2515685 chr8 | 8 | 1394513   | 1398803   | 4291   | 6   | -0.408508 | 0.063917 | 1393955   | 1395072   | 1398426   | 139918:   |
| 233 NA18942 | [2515685 chr8 | 8 | 2238728   | 2253799   | 15072  | 10  | 0.788228  | 0.052037 | 2233839   | 2241488   | 2251039   | 2257521   |
| 234 NA18942 | [2515685 chr8 | 8 | 4110204   | 4112526   | 2323   | 2   | 3.864847  | 0.240391 | 4109692   | 4110717   | 4112031   | 411302:   |
| 235 NA18942 | [2515685 chr8 | 8 | 5582875   | 5594011   | 11137  | 9   | 0.862438  | 0.048792 | 5582615   | 5583135   | 5592820   | 559520:   |
| 236 NA18942 | [2515685 chr8 | 8 | 6812413   | 6813967   | 1555   | 2   | 0.691157  | 0.103136 | 6811881   | 6812946   | 6813560   | 681437:   |
| 237 NA18942 | [2515685 chr8 | 8 | 6817073   | 6866734   | 49662  | 88  | 0.667089  | 0.013078 | 6816809   | 6817338   | 6866719   | 6866751   |
| 238 NA18942 | [2515685 chr8 | 8 | 7098713   | 7430731   | 332019 | 771 | -0.354885 | 0.003101 | 7098285   | 7099142   | 7430300   | 743116:   |
| 239 NA18942 | [2515685 chr8 | 8 | 7607253   | 7830060   | 222808 | 532 | -0.354885 | 0.003101 | 7606824   | 7607682   | 7829852   | 7830261   |
| 240 NA18942 | [2515685 chr8 | 8 | 7878189   | 7928723   | 50535  | 147 | -0.354885 | 0.003101 | 7876934   | 7879444   | 7928292   | 792915:   |
| 241 NA18942 | [2515685 chr8 | 8 | 12023134  | 12033723  | 10590  | 29  | 0.296162  | 0.027161 | 12022997  | 12023272  | 12033419  | 1203402:  |
| 242 NA18942 | [2515685 chr8 | 8 | 12034819  | 12072888  | 38070  | 78  | -0.363877 | 0.014195 | 12034665  | 12034973  | 12072625  | 1207315:  |
| 243 NA18942 | [2515685 chr8 | 8 | 12306216  | 12322179  | 15964  | 36  | -0.42184  | 0.019682 | 12306055  | 12306377  | 12321906  | 1232245:  |
| 244 NA18942 | [2515685 chr8 | 8 | 16245461  | 16251509  | 6049   | 6   | -0.942931 | 0.067804 | 16245129  | 16245794  | 16250812  | 1625220:  |
| 245 NA18942 | [2515685 chr8 | 8 | 18889466  | 18892088  | 2623   | 3   | -0.470465 | 0.093635 | 18888908  | 18890025  | 18891580  | 18892591  |
| 246 NA18942 | [2515685 chr8 | 8 | 18900549  | 18901909  | 1361   | 2   | -0.731072 | 0.107396 | 18900138  | 18900960  | 18901577  | 1890224:  |

|             |                |    |           |           |        |      |           |          |           |           |           |           |
|-------------|----------------|----|-----------|-----------|--------|------|-----------|----------|-----------|-----------|-----------|-----------|
| 247 NA18942 | [2515685 chr8  | 8  | 20022286  | 20024771  | 2486   | 2    | -0.746076 | 0.115052 | 20021082  | 20023491  | 20024338  | 20025204  |
| 248 NA18942 | [2515685 chr8  | 8  | 39352204  | 39506673  | 154470 | 161  | -2.167049 | 0.020605 | 39351913  | 39352495  | 39505284  | 39508064  |
| 249 NA18942 | [2515685 chr8  | 8  | 58276887  | 58289214  | 12328  | 10   | 0.690009  | 0.038965 | 58276659  | 58277116  | 58288084  | 58290344  |
| 250 NA18942 | [2515685 chr8  | 8  | 85423649  | 85431920  | 8272   | 7    | 0.894181  | 0.05693  | 85423043  | 85424256  | 85431347  | 85432494  |
| 251 NA18942 | [2515685 chr8  | 8  | 86742169  | 86910255  | 168087 | 105  | 0.471157  | 0.011304 | 86741757  | 86742581  | 86910002  | 86910504  |
| 252 NA18942 | [2515685 chr8  | 8  | 120222654 | 120229952 | 7299   | 6    | 0.817576  | 0.062713 | 120218251 | 120225414 | 120229434 | 120230474 |
| 253 NA18942 | [2515685 chr8  | 8  | 144782804 | 144785960 | 3157   | 2    | -1.624291 | 0.12939  | 144771440 | 144785564 | 144785821 | 144786094 |
| 254 NA18942 | [2515685 chr9  | 9  | 310045    | 312573    | 2529   | 61   | 0.439694  | 0.016889 | 309952    | 310139    | 312407    | 312740    |
| 255 NA18942 | [2515685 chr9  | 9  | 603464    | 604941    | 1478   | 2    | -0.54539  | 0.107102 | 603138    | 603791    | 604502    | 605380    |
| 256 NA18942 | [2515685 chr9  | 9  | 7875387   | 8411266   | 535880 | 7    | -0.307552 | 0.052881 | 7817373   | 7877756   | 8408897   | 8501613   |
| 257 NA18942 | [2515685 chr9  | 9  | 16890360  | 16893972  | 3613   | 4    | -0.570905 | 0.07833  | 16889923  | 16890798  | 16893672  | 16894274  |
| 258 NA18942 | [2515685 chr9  | 9  | 38763857  | 38952823  | 188967 | 330  | -0.26878  | 0.007894 | 38761896  | 38765818  | 38952514  | 38953134  |
| 259 NA18942 | [2515685 chr9  | 9  | 38973401  | 38974176  | 776    | 2    | 0.596869  | 0.100194 | 38973122  | 38973680  | 38974034  | 38974314  |
| 260 NA18942 | [2515685 chr9  | 9  | 40259956  | 40273456  | 13501  | 27   | -0.368414 | 0.029271 | 40259802  | 40260111  | 40271087  | 40276964  |
| 261 NA18942 | [2515685 chr9  | 9  | 41125241  | 41125745  | 505    | 2    | 0.596868  | 0.100194 | 41125099  | 41125384  | 41125737  | 41125754  |
| 262 NA18942 | [2515685 chr9  | 9  | 41144937  | 41284169  | 139233 | 247  | -0.256021 | 0.00916  | 41144706  | 41145169  | 41281800  | 41333734  |
| 263 NA18942 | [2515685 chr9  | 9  | 43059964  | 43066832  | 6869   | 15   | -0.34953  | 0.035992 | 43059908  | 43060020  | 43066646  | 43067014  |
| 264 NA18942 | [2515685 chr9  | 9  | 43182765  | 43196301  | 13537  | 26   | -0.39097  | 0.029226 | 43179223  | 43185134  | 43196147  | 43196454  |
| 265 NA18942 | [2515685 chr9  | 9  | 43965867  | 44064418  | 98552  | 21   | -0.295448 | 0.027341 | 43961965  | 43968236  | 44064295  | 44064544  |
| 266 NA18942 | [2515685 chr9  | 9  | 65937679  | 65938183  | 505    | 2    | 0.596867  | 0.100194 | 65937537  | 65937822  | 65938175  | 65938194  |
| 267 NA18942 | [2515685 chr9  | 9  | 65957375  | 66148053  | 190679 | 315  | -0.258761 | 0.008023 | 65957144  | 65957607  | 66147715  | 66148394  |
| 268 NA18942 | [2515685 chr9  | 9  | 89405187  | 89407924  | 2738   | 2    | -0.970667 | 0.110621 | 89404572  | 89405803  | 89407164  | 89408684  |
| 269 NA18942 | [2515685 chr9  | 9  | 101918451 | 101919219 | 769    | 2    | -0.578091 | 0.093068 | 101918027 | 101918876 | 101918914 | 101919524 |
| 270 NA18942 | [2515685 chr9  | 9  | 135438412 | 135444067 | 5656   | 2    | 2.889142  | 0.15796  | 135383632 | 135440781 | 135443016 | 135445114 |
| 271 NA18942 | [2515685 chr10 | 10 | 6693908   | 6704321   | 10414  | 9    | 0.820211  | 0.053791 | 6692231   | 6695585   | 6704008   | 6704634   |
| 272 NA18942 | [2515685 chr10 | 10 | 19788068  | 19791314  | 3247   | 4    | -0.412299 | 0.070047 | 19787726  | 19788411  | 19790970  | 19791654  |
| 273 NA18942 | [2515685 chr10 | 10 | 45507742  | 45516613  | 8872   | 22   | -0.304952 | 0.026457 | 45507577  | 45507908  | 45515837  | 45517394  |
| 274 NA18942 | [2515685 chr10 | 10 | 45642385  | 45649494  | 7110   | 19   | -0.29693  | 0.02848  | 45642368  | 45642402  | 45649171  | 45649814  |
| 275 NA18942 | [2515685 chr10 | 10 | 46110964  | 46129517  | 18554  | 31   | -0.346302 | 0.021242 | 46110327  | 46111602  | 46129280  | 46129754  |
| 276 NA18942 | [2515685 chr10 | 10 | 46132047  | 46132737  | 691    | 2    | -1.153589 | 0.089002 | 46131767  | 46132327  | 46132697  | 46132774  |
| 277 NA18942 | [2515685 chr10 | 10 | 46168755  | 46171356  | 2602   | 11   | -0.389425 | 0.039202 | 46168488  | 46169022  | 46171200  | 46171514  |
| 278 NA18942 | [2515685 chr10 | 10 | 46187014  | 47173707  | 986694 | 1443 | -0.330438 | 0.003365 | 46186825  | 46187203  | 47173507  | 47173904  |
| 279 NA18942 | [2515685 chr10 | 10 | 47219897  | 47220637  | 741    | 5    | -0.6513   | 0.066634 | 47219892  | 47219903  | 47220533  | 47220744  |
| 280 NA18942 | [2515685 chr10 | 10 | 47226321  | 47231502  | 5182   | 21   | -0.375775 | 0.027668 | 47226266  | 47226377  | 47231201  | 47231804  |
| 281 NA18942 | [2515685 chr10 | 10 | 47723232  | 47803532  | 80301  | 220  | -0.320027 | 0.008462 | 47575187  | 47725982  | 47802824  | 47804244  |
| 282 NA18942 | [2515685 chr10 | 10 | 47878214  | 47878897  | 684    | 3    | -0.629354 | 0.085271 | 47878209  | 47878220  | 47878725  | 47879074  |
| 283 NA18942 | [2515685 chr10 | 10 | 47884646  | 47889830  | 5185   | 21   | -0.384902 | 0.027379 | 47884591  | 47884702  | 47889529  | 47890134  |
| 284 NA18942 | [2515685 chr10 | 10 | 48499879  | 48529999  | 30121  | 57   | -0.336114 | 0.015832 | 48499351  | 48500407  | 48529215  | 48530784  |
| 285 NA18942 | [2515685 chr10 | 10 | 48576756  | 48865591  | 288836 | 274  | -0.329464 | 0.007057 | 48576562  | 48576950  | 48865564  | 48865614  |
| 286 NA18942 | [2515685 chr10 | 10 | 50894581  | 50903111  | 8531   | 21   | -0.295919 | 0.026924 | 50894321  | 50894841  | 50902788  | 50903434  |
| 287 NA18942 | [2515685 chr10 | 10 | 51131637  | 51132551  | 915    | 3    | -0.689921 | 0.078043 | 51131357  | 51131917  | 51132382  | 51132724  |
| 288 NA18942 | [2515685 chr10 | 10 | 51431625  | 51440113  | 8489   | 22   | -0.314995 | 0.027776 | 51431512  | 51431739  | 51440104  | 51440124  |
| 289 NA18942 | [2515685 chr10 | 10 | 56117212  | 56139275  | 22064  | 20   | -1.044483 | 0.035613 | 56115764  | 56118661  | 56138931  | 56139614  |
| 290 NA18942 | [2515685 chr10 | 10 | 66977355  | 66985193  | 7839   | 8    | -1.061118 | 0.064099 | 66976803  | 66977908  | 66984894  | 66985494  |
| 291 NA18942 | [2515685 chr10 | 10 | 81463822  | 81483091  | 19270  | 18   | -0.251045 | 0.02619  | 81463181  | 81464464  | 81483091  | 81483094  |
| 292 NA18942 | [2515685 chr10 | 10 | 88866216  | 88966295  | 100080 | 111  | -0.331365 | 0.01261  | 88865617  | 88866816  | 88965910  | 88966684  |
| 293 NA18942 | [2515685 chr10 | 10 | 89138419  | 89180379  | 41961  | 72   | -0.250519 | 0.015839 | 89137950  | 89138889  | 89180173  | 89180584  |
| 294 NA18942 | [2515685 chr10 | 10 | 114102241 | 114106477 | 4237   | 5    | -4.631741 | 0.169944 | 114101694 | 114102788 | 114105867 | 114107084 |
| 295 NA18942 | [2515685 chr10 | 10 | 124329845 | 124366738 | 36894  | 42   | -0.958969 | 0.018849 | 124329442 | 124330248 | 124366300 | 124367174 |
| 296 NA18942 | [2515685 chr10 | 10 | 135367159 | 135389814 | 22656  | 19   | -0.35455  | 0.02346  | 135366656 | 135367663 | 135387500 | 135392124 |
| 297 NA18942 | [2515685 chr11 | 11 | 3628748   | 3632795   | 4048   | 6    | -2.532755 | 0.093933 | 3625722   | 3631775   | 3632594   | 3632994   |
| 298 NA18942 | [2515685 chr11 | 11 | 4924831   | 4933540   | 8710   | 9    | -0.801007 | 0.050482 | 4924403   | 4925260   | 4933251   | 4933834   |
| 299 NA18942 | [2515685 chr11 | 11 | 5717038   | 5722033   | 4996   | 3    | 2.884493  | 0.158564 | 5716660   | 5717416   | 5718945   | 5725487   |
| 300 NA18942 | [2515685 chr11 | 11 | 5741781   | 5765993   | 24213  | 30   | 2.873241  | 0.047537 | 5741059   | 5742504   | 5765632   | 5766354   |
| 301 NA18942 | [2515685 chr11 | 11 | 11780222  | 11782174  | 1953   | 2    | -0.901352 | 0.104333 | 11779958  | 11780486  | 11781057  | 11783294  |

|             |                |    |           |           |        |     |           |          |           |           |           |           |
|-------------|----------------|----|-----------|-----------|--------|-----|-----------|----------|-----------|-----------|-----------|-----------|
| 302 NA18942 | [2515685 chr11 | 11 | 18903445  | 18923027  | 19583  | 30  | 0.487404  | 0.026594 | 18897800  | 18906533  | 18919939  | 18928457  |
| 303 NA18942 | [2515685 chr11 | 11 | 28965605  | 28969186  | 3582   | 5   | 4.710593  | 0.163096 | 28965284  | 28965927  | 28968702  | 28969670  |
| 304 NA18942 | [2515685 chr11 | 11 | 48284073  | 48284771  | 699    | 2   | 0.932431  | 0.104372 | 48283862  | 48284285  | 48284572  | 48284970  |
| 305 NA18942 | [2515685 chr11 | 11 | 48997072  | 49001951  | 4880   | 10  | 0.423268  | 0.046986 | 48996760  | 48997384  | 49001459  | 49002444  |
| 306 NA18942 | [2515685 chr11 | 11 | 49665830  | 49715836  | 50007  | 36  | 0.517865  | 0.024748 | 49665251  | 49666410  | 49712748  | 49721987  |
| 307 NA18942 | [2515685 chr11 | 11 | 55124643  | 55212656  | 88014  | 98  | -0.869026 | 0.016295 | 55124460  | 55124827  | 55209568  | 55215759  |
| 308 NA18942 | [2515685 chr11 | 11 | 60721034  | 60777477  | 56444  | 73  | 0.680707  | 0.0142   | 60720112  | 60721956  | 60776810  | 60778141  |
| 309 NA18942 | [2515685 chr11 | 11 | 73812690  | 73818580  | 5891   | 4   | -0.494094 | 0.077576 | 73812400  | 73812981  | 73818213  | 73818941  |
| 310 NA18942 | [2515685 chr11 | 11 | 88266938  | 88303948  | 37011  | 39  | 0.25664   | 0.023874 | 88266424  | 88267453  | 88303762  | 88304131  |
| 311 NA18942 | [2515685 chr11 | 11 | 89184898  | 89189792  | 4895   | 5   | 0.694781  | 0.077814 | 89184243  | 89185554  | 89189177  | 89190407  |
| 312 NA18942 | [2515685 chr11 | 11 | 89260757  | 89266247  | 5491   | 9   | -1.099443 | 0.054264 | 89260437  | 89261077  | 89265993  | 89266507  |
| 313 NA18942 | [2515685 chr11 | 11 | 89323920  | 89329409  | 5490   | 11  | -1.021361 | 0.048579 | 89323666  | 89324175  | 89329090  | 89329727  |
| 314 NA18942 | [2515685 chr11 | 11 | 93334621  | 93341944  | 7324   | 8   | -0.926903 | 0.057801 | 93334320  | 93334923  | 93341681  | 93342207  |
| 315 NA18942 | [2515685 chr11 | 11 | 113973002 | 114017431 | 44430  | 51  | 0.265943  | 0.020279 | 113972770 | 113973235 | 114016982 | 114017887 |
| 316 NA18942 | [2515685 chr11 | 11 | 129852648 | 129853962 | 1315   | 2   | -0.657659 | 0.109256 | 129852398 | 129852898 | 129852965 | 129854967 |
| 317 NA18942 | [2515685 chr11 | 11 | 134107699 | 134112290 | 4592   | 5   | 0.941653  | 0.072104 | 134106591 | 134108808 | 134111845 | 134111273 |
| 318 NA18942 | [2515685 chr12 | 12 | 300666    | 302505    | 1840   | 2   | -0.610055 | 0.103637 | 300400    | 300933    | 301926    | 303084    |
| 319 NA18942 | [2515685 chr12 | 12 | 398598    | 404873    | 6276   | 14  | -0.365811 | 0.029204 | 398035    | 399161    | 401600    | 408146    |
| 320 NA18942 | [2515685 chr12 | 12 | 503225    | 504669    | 1445   | 2   | -0.499811 | 0.099474 | 502781    | 503669    | 504370    | 504968    |
| 321 NA18942 | [2515685 chr12 | 12 | 736840    | 744802    | 7963   | 9   | 0.924145  | 0.051455 | 736616    | 737064    | 744211    | 745394    |
| 322 NA18942 | [2515685 chr12 | 12 | 2112534   | 2127840   | 15307  | 16  | 0.700437  | 0.038348 | 2109107   | 2115961   | 2127279   | 2128407   |
| 323 NA18942 | [2515685 chr12 | 12 | 6113530   | 6117052   | 3523   | 3   | 0.735148  | 0.096845 | 6111640   | 6115421   | 6116289   | 6117816   |
| 324 NA18942 | [2515685 chr12 | 12 | 8252934   | 8270350   | 17417  | 30  | -0.440037 | 0.024494 | 8252612   | 8253256   | 8269654   | 8271046   |
| 325 NA18942 | [2515685 chr12 | 12 | 9439936   | 9445623   | 5688   | 9   | 0.319293  | 0.045739 | 9439574   | 9440298   | 9445247   | 9446007   |
| 326 NA18942 | [2515685 chr12 | 12 | 9527659   | 9624971   | 97313  | 104 | 0.710902  | 0.016025 | 9526872   | 9528447   | 9623223   | 9626720   |
| 327 NA18942 | [2515685 chr12 | 12 | 10471489  | 10486130  | 14642  | 13  | -0.477372 | 0.044579 | 10470962  | 10472016  | 10485876  | 10486387  |
| 328 NA18942 | [2515685 chr12 | 12 | 11392856  | 11439351  | 46496  | 45  | -0.331142 | 0.021298 | 11392505  | 11393207  | 11439183  | 11439517  |
| 329 NA18942 | [2515685 chr12 | 12 | 18447524  | 18453404  | 5881   | 2   | -0.4512   | 0.089562 | 18435370  | 18451025  | 18451589  | 18455217  |
| 330 NA18942 | [2515685 chr12 | 12 | 30128711  | 30133561  | 4851   | 3   | -0.928308 | 0.085846 | 30128382  | 30129041  | 30132177  | 30134947  |
| 331 NA18942 | [2515685 chr12 | 12 | 31157023  | 31244780  | 87758  | 82  | 0.41715   | 0.016656 | 31156773  | 31157274  | 31244217  | 31245347  |
| 332 NA18942 | [2515685 chr12 | 12 | 31869213  | 31878319  | 9107   | 4   | 0.870408  | 0.07453  | 31864235  | 31872714  | 31878008  | 31878637  |
| 333 NA18942 | [2515685 chr12 | 12 | 51063394  | 51066454  | 3061   | 2   | 0.621435  | 0.119908 | 51062509  | 51064280  | 51065979  | 51066937  |
| 334 NA18942 | [2515685 chr12 | 12 | 70475445  | 70476812  | 1368   | 2   | -4.154697 | 0.248308 | 70475180  | 70475711  | 70476524  | 70477107  |
| 335 NA18942 | [2515685 chr12 | 12 | 78656134  | 78665261  | 9128   | 9   | -0.545914 | 0.05169  | 78654687  | 78657582  | 78664736  | 78665787  |
| 336 NA18942 | [2515685 chr12 | 12 | 128601598 | 128602937 | 1340   | 2   | -0.928374 | 0.106081 | 128601341 | 128601856 | 128602454 | 12860342  |
| 337 NA18942 | [2515685 chr12 | 12 | 130777013 | 130778340 | 1328   | 2   | -0.561266 | 0.102126 | 130776667 | 130777359 | 130778020 | 130778667 |
| 338 NA18942 | [2515685 chr12 | 12 | 130798727 | 130802870 | 4144   | 5   | -0.870961 | 0.064609 | 130798268 | 130799187 | 130801345 | 13080439  |
| 339 NA18942 | [2515685 chr13 | 13 | 25947233  | 25950398  | 3166   | 3   | 3.957992  | 0.177156 | 25946194  | 25948272  | 25949415  | 25951387  |
| 340 NA18942 | [2515685 chr13 | 13 | 36971484  | 36983475  | 11992  | 10  | -0.98112  | 0.054075 | 36969416  | 36973552  | 36982905  | 36984047  |
| 341 NA18942 | [2515685 chr13 | 13 | 56589224  | 56644889  | 55666  | 65  | 0.321221  | 0.013796 | 56585659  | 56592790  | 56644862  | 56644917  |
| 342 NA18942 | [2515685 chr13 | 13 | 69633905  | 69673289  | 39385  | 42  | 0.785359  | 0.024155 | 69633412  | 69634399  | 69672985  | 69673597  |
| 343 NA18942 | [2515685 chr13 | 13 | 109215660 | 109217089 | 1430   | 5   | -0.86585  | 0.062859 | 109215230 | 109216090 | 109216885 | 10921729  |
| 344 NA18942 | [2515685 chr13 | 13 | 112717306 | 112719112 | 1807   | 2   | -0.772238 | 0.111229 | 112716919 | 112717694 | 112718845 | 11271938  |
| 345 NA18942 | [2515685 chr13 | 13 | 113079647 | 113086828 | 7182   | 3   | 0.755015  | 0.083879 | 113078890 | 113080404 | 113082138 | 11309434  |
| 346 NA18942 | [2515685 chr14 | 14 | 18527136  | 18541076  | 13941  | 6   | -1.521808 | 0.073275 | 18526373  | 18527899  | 18540534  | 18541617  |
| 347 NA18942 | [2515685 chr14 | 14 | 19112070  | 19144504  | 32435  | 45  | -0.266444 | 0.020225 | 19112035  | 19112105  | 19144239  | 19144770  |
| 348 NA18942 | [2515685 chr14 | 14 | 19254367  | 19372214  | 117848 | 102 | 0.262247  | 0.014189 | 19254200  | 19254535  | 19367437  | 19377317  |
| 349 NA18942 | [2515685 chr14 | 14 | 32022775  | 32026140  | 3366   | 2   | -0.637332 | 0.114335 | 32022274  | 32023276  | 32023749  | 32028537  |
| 350 NA18942 | [2515685 chr14 | 14 | 40895652  | 40897384  | 1733   | 2   | -0.80866  | 0.120041 | 40895015  | 40896289  | 40897151  | 40897617  |
| 351 NA18942 | [2515685 chr14 | 14 | 42059344  | 42062997  | 3654   | 2   | 0.773599  | 0.117784 | 42056485  | 42062203  | 42062601  | 42063397  |
| 352 NA18942 | [2515685 chr14 | 14 | 73052083  | 73053781  | 1699   | 2   | -0.488878 | 0.080323 | 73051714  | 73052452  | 73052927  | 73054637  |
| 353 NA18942 | [2515685 chr14 | 14 | 73070288  | 73077249  | 6962   | 7   | -0.723201 | 0.065353 | 73068747  | 73071829  | 73076337  | 73078167  |
| 354 NA18942 | [2515685 chr14 | 14 | 73082530  | 73084642  | 2113   | 2   | -0.635116 | 0.112738 | 73082278  | 73082782  | 73083193  | 73086097  |
| 355 NA18942 | [2515685 chr14 | 14 | 73106064  | 73110687  | 4624   | 3   | 0.936718  | 0.085289 | 73105752  | 73106376  | 73110054  | 73111327  |
| 356 NA18942 | [2515685 chr14 | 14 | 73113949  | 73117243  | 3295   | 4   | 0.386622  | 0.073564 | 73113745  | 73114154  | 73116211  | 73118277  |

|             |                |    |           |           |        |     |           |          |           |           |           |          |
|-------------|----------------|----|-----------|-----------|--------|-----|-----------|----------|-----------|-----------|-----------|----------|
| 357 NA18942 | [2515685 chr14 | 14 | 104766812 | 104778505 | 11694  | 145 | -0.444118 | 0.010253 | 104766457 | 104767167 | 104778286 | 10477872 |
| 358 NA18942 | [2515685 chr15 | 15 | 18513088  | 18536491  | 23404  | 22  | 0.449968  | 0.026529 | 18512905  | 18513272  | 18535776  | 1853720  |
| 359 NA18942 | [2515685 chr15 | 15 | 18704122  | 18750936  | 46815  | 51  | 0.259387  | 0.019941 | 18703644  | 18704600  | 18750719  | 1875115  |
| 360 NA18942 | [2515685 chr15 | 15 | 18807296  | 18894799  | 87504  | 93  | 0.595423  | 0.015818 | 18804971  | 18809603  | 18894022  | 1889557  |
| 361 NA18942 | [2515685 chr15 | 15 | 18982174  | 18982857  | 684    | 4   | -0.329647 | 0.057634 | 18981996  | 18982352  | 18982746  | 1898296  |
| 362 NA18942 | [2515685 chr15 | 15 | 19091518  | 19468608  | 377091 | 471 | 0.453772  | 0.004344 | 19091509  | 19091528  | 19468389  | 1946882  |
| 363 NA18942 | [2515685 chr15 | 15 | 19665548  | 20094955  | 429408 | 340 | 0.453772  | 0.004344 | 19663241  | 19763507  | 20092648  | 2019778  |
| 364 NA18942 | [2515685 chr15 | 15 | 20940396  | 20940987  | 592    | 4   | -0.329647 | 0.057634 | 20940218  | 20940574  | 20940968  | 2094100  |
| 365 NA18942 | [2515685 chr15 | 15 | 21051502  | 21068076  | 16575  | 14  | 0.645502  | 0.033366 | 21051321  | 21051684  | 21065769  | 2111638  |
| 366 NA18942 | [2515685 chr15 | 15 | 21228095  | 21228686  | 592    | 4   | -0.329648 | 0.057634 | 21227917  | 21228273  | 21228667  | 2122870  |
| 367 NA18942 | [2515685 chr15 | 15 | 21605983  | 21614605  | 8623   | 8   | 0.71828   | 0.059106 | 21605507  | 21606459  | 21612298  | 2163669  |
| 368 NA18942 | [2515685 chr15 | 15 | 21883852  | 22345413  | 461562 | 467 | -0.278327 | 0.006318 | 21881407  | 21886159  | 22345311  | 2234551  |
| 369 NA18942 | [2515685 chr15 | 15 | 22350552  | 22377953  | 27402  | 45  | -0.278327 | 0.006318 | 22349714  | 22351391  | 22377818  | 2237808  |
| 370 NA18942 | [2515685 chr15 | 15 | 23482566  | 23483671  | 1106   | 2   | 0.692796  | 0.082475 | 23482224  | 23482908  | 23483437  | 2348390  |
| 371 NA18942 | [2515685 chr15 | 15 | 24986053  | 24992250  | 6198   | 7   | 0.910808  | 0.062776 | 24985426  | 24986680  | 24991680  | 2499282  |
| 372 NA18942 | [2515685 chr15 | 15 | 27688132  | 27690372  | 2241   | 3   | -0.957318 | 0.0986   | 27687785  | 27688480  | 27690197  | 2769054  |
| 373 NA18942 | [2515685 chr15 | 15 | 29537358  | 29539785  | 2428   | 2   | -0.530504 | 0.091719 | 29536978  | 29537739  | 29539279  | 2954029  |
| 374 NA18942 | [2515685 chr15 | 15 | 32469460  | 32653413  | 183954 | 185 | 0.346641  | 0.009761 | 32469063  | 32469858  | 32653144  | 3265368  |
| 375 NA18942 | [2515685 chr15 | 15 | 43106834  | 43111174  | 4341   | 5   | 0.487336  | 0.06403  | 43106498  | 43107171  | 43111071  | 4311127  |
| 376 NA18942 | [2515685 chr15 | 15 | 59490762  | 59495993  | 5232   | 2   | -0.586731 | 0.109387 | 59490146  | 59491378  | 59494114  | 5949787  |
| 377 NA18942 | [2515685 chr15 | 15 | 82333041  | 82335194  | 2154   | 2   | -3.618583 | 0.198927 | 82332284  | 82333799  | 82334729  | 8233566  |
| 378 NA18942 | [2515685 chr15 | 15 | 98234084  | 98240716  | 6633   | 8   | -3.07217  | 0.114426 | 98233842  | 98234327  | 98239350  | 9824208  |
| 379 NA18942 | [2515685 chr15 | 15 | 100109640 | 100122682 | 13043  | 98  | 0.681959  | 0.01158  | 100108905 | 100110376 | 100122315 | 10012305 |
| 380 NA18942 | [2515685 chr16 | 16 | 946002    | 948831    | 2830   | 2   | -0.926845 | 0.112388 | 945660    | 946345    | 947314    | 950345   |
| 381 NA18942 | [2515685 chr16 | 16 | 2638196   | 2640225   | 2030   | 3   | 0.608995  | 0.094998 | 2637783   | 2638609   | 2639826   | 264062   |
| 382 NA18942 | [2515685 chr16 | 16 | 5287117   | 5290634   | 3518   | 2   | -0.76453  | 0.143279 | 5286149   | 5288085   | 5288751   | 529327   |
| 383 NA18942 | [2515685 chr16 | 16 | 14696077  | 14709851  | 13775  | 10  | 0.316945  | 0.03338  | 14695838  | 14696316  | 14709124  | 1471057  |
| 384 NA18942 | [2515685 chr16 | 16 | 14735195  | 14748973  | 13779  | 10  | 0.316945  | 0.03338  | 14734956  | 14735434  | 14748246  | 1474970  |
| 385 NA18942 | [2515685 chr16 | 16 | 14955818  | 15030359  | 74542  | 68  | -0.572693 | 0.018204 | 14955356  | 14956281  | 15029969  | 1503075  |
| 386 NA18942 | [2515685 chr16 | 16 | 16363185  | 16372248  | 9064   | 27  | 0.287296  | 0.025601 | 16363092  | 16363279  | 16371995  | 1637250  |
| 387 NA18942 | [2515685 chr16 | 16 | 16633469  | 16639120  | 5652   | 4   | 0.660347  | 0.074707 | 16632502  | 16634437  | 16638386  | 1663985  |
| 388 NA18942 | [2515685 chr16 | 16 | 18012349  | 18016356  | 4008   | 2   | 0.516549  | 0.091564 | 18011923  | 18012775  | 18016027  | 1801668  |
| 389 NA18942 | [2515685 chr16 | 16 | 18380730  | 18391709  | 10980  | 34  | 0.272788  | 0.022111 | 18380411  | 18381050  | 18391616  | 1839180  |
| 390 NA18942 | [2515685 chr16 | 16 | 28522768  | 28525408  | 2641   | 3   | -0.842896 | 0.081113 | 28522366  | 28523170  | 28525115  | 2852570  |
| 391 NA18942 | [2515685 chr16 | 16 | 28528415  | 28530590  | 2176   | 3   | -0.678169 | 0.083773 | 28528196  | 28528634  | 28529733  | 2853144  |
| 392 NA18942 | [2515685 chr16 | 16 | 28617225  | 28641597  | 24373  | 41  | 0.305878  | 0.022326 | 28615757  | 28618694  | 28641268  | 2864192  |
| 393 NA18942 | [2515685 chr16 | 16 | 32154214  | 32159898  | 5685   | 20  | -0.291394 | 0.02833  | 32154161  | 32154267  | 32159453  | 3216034  |
| 394 NA18942 | [2515685 chr16 | 16 | 32159898  | 32160377  | 480    | 2   | -1.762592 | 0.096752 | 32159453  | 32160343  | 32160346  | 3216040  |
| 395 NA18942 | [2515685 chr16 | 16 | 32160377  | 32179714  | 19338  | 50  | -0.32399  | 0.017625 | 32160346  | 32160346  | 32160408  | 32179360 |
| 396 NA18942 | [2515685 chr16 | 16 | 32182731  | 32197170  | 14440  | 14  | -0.288182 | 0.03259  | 32182627  | 32182836  | 32196926  | 3219741  |
| 397 NA18942 | [2515685 chr16 | 16 | 32570265  | 32606692  | 36428  | 81  | -0.296708 | 0.01366  | 32570138  | 32570393  | 32606661  | 3260672  |
| 398 NA18942 | [2515685 chr16 | 16 | 32606692  | 32607163  | 472    | 2   | -1.762597 | 0.096752 | 32606661  | 32606724  | 32606727  | 3260759  |
| 399 NA18942 | [2515685 chr16 | 16 | 32607163  | 32612690  | 5528   | 19  | -0.337225 | 0.029229 | 32606727  | 32607599  | 32612572  | 3261280  |
| 400 NA18942 | [2515685 chr16 | 16 | 33090257  | 33194268  | 104012 | 240 | -0.298186 | 0.00791  | 33089860  | 33090654  | 33194099  | 3319443  |
| 401 NA18942 | [2515685 chr16 | 16 | 34321823  | 34609076  | 287254 | 322 | -0.535916 | 0.008297 | 34317185  | 34323706  | 34607193  | 3461732  |
| 402 NA18942 | [2515685 chr16 | 16 | 53320202  | 53336369  | 16168  | 17  | -0.865612 | 0.039607 | 53319925  | 53320479  | 53335591  | 5333714  |
| 403 NA18942 | [2515685 chr16 | 16 | 54353711  | 54362962  | 9252   | 10  | -0.883182 | 0.056659 | 54353419  | 54354004  | 54362223  | 5436370  |
| 404 NA18942 | [2515685 chr16 | 16 | 54365075  | 54369383  | 4309   | 6   | -2.799434 | 0.089862 | 54364721  | 54365430  | 54368899  | 5436986  |
| 405 NA18942 | [2515685 chr16 | 16 | 54370325  | 54380125  | 9801   | 8   | -0.786864 | 0.058189 | 54369868  | 54370782  | 54379862  | 5438038  |
| 406 NA18942 | [2515685 chr16 | 16 | 54399675  | 54422911  | 23237  | 29  | 0.40959   | 0.028543 | 54399445  | 54399906  | 54422635  | 5442318  |
| 407 NA18942 | [2515685 chr16 | 16 | 57204541  | 57207585  | 3045   | 3   | 5.41956   | 0.222631 | 57204170  | 57204913  | 57206938  | 5720823  |
| 408 NA18942 | [2515685 chr16 | 16 | 57231525  | 57234603  | 3079   | 2   | -0.668657 | 0.094932 | 57230452  | 57232599  | 57233543  | 5723566  |
| 409 NA18942 | [2515685 chr16 | 16 | 68535571  | 68541241  | 5671   | 5   | -0.493232 | 0.05914  | 68535345  | 68535798  | 68540782  | 6854170  |
| 410 NA18942 | [2515685 chr16 | 16 | 68602449  | 68666721  | 64273  | 59  | -0.311305 | 0.009584 | 68602144  | 68602755  | 68666385  | 6866705  |
| 411 NA18942 | [2515685 chr16 | 16 | 68702274  | 68789580  | 87307  | 121 | -0.311305 | 0.009584 | 68701593  | 68702955  | 68789287  | 6878987  |

|             |                |    |          |          |        |     |           |          |          |          |          |          |
|-------------|----------------|----|----------|----------|--------|-----|-----------|----------|----------|----------|----------|----------|
| 412 NA18942 | [2515685 chr16 | 16 | 72921362 | 72965445 | 44084  | 41  | -0.482329 | 0.022746 | 72920922 | 72921803 | 72964811 | 7296607! |
| 413 NA18942 | [2515685 chr16 | 16 | 73014274 | 73019747 | 5474   | 5   | -0.509948 | 0.060216 | 73013873 | 73014676 | 73019521 | 7301997: |
| 414 NA18942 | [2515685 chr16 | 16 | 76930776 | 76942282 | 11507  | 9   | 0.678346  | 0.0483   | 76930290 | 76931263 | 76941602 | 7694296; |
| 415 NA18942 | [2515685 chr16 | 16 | 83994929 | 84004171 | 9243   | 81  | 0.330881  | 0.013953 | 83994558 | 83995300 | 84003767 | 8400457! |
| 416 NA18942 | [2515685 chr16 | 16 | 84562720 | 84565235 | 2516   | 11  | 0.350122  | 0.046333 | 84561685 | 84563756 | 84565142 | 8456532! |
| 417 NA18942 | [2515685 chr16 | 16 | 86589422 | 86592315 | 2894   | 4   | -0.712748 | 0.078796 | 86589032 | 86589812 | 86591962 | 8659266! |
| 418 NA18942 | [2515685 chr16 | 16 | 86669849 | 86672366 | 2518   | 2   | -0.82321  | 0.0946   | 86669288 | 86670411 | 86671217 | 8667351! |
| 419 NA18942 | [2515685 chr16 | 16 | 88181036 | 88182713 | 1678   | 2   | -1.026305 | 0.103516 | 88180612 | 88181461 | 88182173 | 8818325: |
| 420 NA18942 | [2515685 chr17 | 17 | 966845   | 969578   | 2734   | 21  | 1.430064  | 0.040551 | 966537   | 967154   | 969378   | 96977!   |
| 421 NA18942 | [2515685 chr17 | 17 | 18296513 | 18331739 | 35227  | 50  | 0.267108  | 0.020163 | 18296246 | 18296781 | 18331509 | 1833197! |
| 422 NA18942 | [2515685 chr17 | 17 | 18331739 | 18332345 | 607    | 2   | -0.919632 | 0.101526 | 18331509 | 18331970 | 18331978 | 1833271: |
| 423 NA18942 | [2515685 chr17 | 17 | 18873323 | 19074342 | 201020 | 373 | -0.273861 | 0.0067   | 18873109 | 18873538 | 19074050 | 1907463! |
| 424 NA18942 | [2515685 chr17 | 17 | 20299935 | 20300531 | 597    | 2   | -0.91963  | 0.101525 | 20299568 | 20300303 | 20300311 | 2030075: |
| 425 NA18942 | [2515685 chr17 | 17 | 20325192 | 20325864 | 673    | 2   | 0.612112  | 0.084723 | 20324968 | 20325416 | 20325582 | 2032614! |
| 426 NA18942 | [2515685 chr17 | 17 | 21826349 | 21834752 | 8404   | 7   | 0.338562  | 0.04457  | 21826238 | 21826461 | 21833710 | 2183579- |
| 427 NA18942 | [2515685 chr17 | 17 | 21941205 | 21955530 | 14326  | 23  | -0.297657 | 0.029793 | 21940656 | 21941754 | 21955191 | 2195586! |
| 428 NA18942 | [2515685 chr17 | 17 | 31434845 | 31457488 | 22644  | 40  | 0.387039  | 0.021731 | 31434318 | 31435373 | 31457079 | 3145789! |
| 429 NA18942 | [2515685 chr17 | 17 | 31505929 | 31515059 | 9131   | 15  | 0.380653  | 0.032709 | 31505824 | 31506035 | 31514906 | 3151521: |
| 430 NA18942 | [2515685 chr17 | 17 | 31531259 | 31578624 | 47366  | 69  | 0.34223   | 0.007552 | 31531038 | 31531480 | 31578609 | 3157864! |
| 431 NA18942 | [2515685 chr17 | 17 | 31592272 | 31680187 | 87916  | 161 | 0.34223   | 0.007552 | 31591933 | 31592611 | 31680172 | 3168020: |
| 432 NA18942 | [2515685 chr17 | 17 | 31693833 | 31701130 | 7298   | 20  | 0.384969  | 0.027958 | 31693494 | 31694173 | 31698927 | 3179999! |
| 433 NA18942 | [2515685 chr17 | 17 | 31807301 | 31818118 | 10818  | 31  | 0.376027  | 0.0222   | 31806958 | 31807644 | 31817965 | 3181827: |
| 434 NA18942 | [2515685 chr17 | 17 | 31833404 | 31869170 | 35767  | 46  | 0.346535  | 0.018064 | 31833198 | 31833610 | 31869017 | 3186932: |
| 435 NA18942 | [2515685 chr17 | 17 | 31885359 | 31889223 | 3865   | 8   | 0.364202  | 0.03844  | 31885138 | 31885580 | 31888786 | 3188966: |
| 436 NA18942 | [2515685 chr17 | 17 | 32829500 | 32833231 | 3732   | 5   | 0.81957   | 0.074906 | 32828825 | 32830175 | 32832670 | 3283379: |
| 437 NA18942 | [2515685 chr17 | 17 | 33324385 | 33355197 | 30813  | 33  | 0.351396  | 0.021433 | 33323841 | 33324930 | 33354974 | 3335542! |
| 438 NA18942 | [2515685 chr17 | 17 | 33370166 | 33382224 | 12059  | 40  | 0.371461  | 0.019573 | 33369977 | 33370355 | 33381884 | 3338256- |
| 439 NA18942 | [2515685 chr17 | 17 | 33400862 | 33407706 | 6845   | 7   | -0.461568 | 0.058416 | 33399823 | 33401902 | 33407335 | 3340807: |
| 440 NA18942 | [2515685 chr17 | 17 | 33425145 | 33430794 | 5650   | 10  | -0.492516 | 0.044991 | 33424532 | 33425759 | 33428591 | 3352929! |
| 441 NA18942 | [2515685 chr17 | 17 | 33527087 | 33591225 | 64139  | 124 | 0.28588   | 0.010992 | 33428591 | 33529290 | 33590848 | 3359160: |
| 442 NA18942 | [2515685 chr17 | 17 | 33604501 | 33639547 | 35047  | 44  | 0.656726  | 0.02284  | 33603951 | 33605052 | 33638405 | 3364068! |
| 443 NA18942 | [2515685 chr17 | 17 | 33641281 | 33659558 | 18278  | 30  | -0.436927 | 0.027236 | 33640689 | 33641874 | 33658997 | 3366011! |
| 444 NA18942 | [2515685 chr17 | 17 | 36646378 | 36649001 | 2624   | 2   | -0.61112  | 0.082787 | 36645905 | 36646851 | 36648704 | 3664929! |
| 445 NA18942 | [2515685 chr17 | 17 | 36675530 | 36685343 | 9814   | 10  | -2.787768 | 0.080425 | 36675011 | 36676049 | 36684647 | 3668604! |
| 446 NA18942 | [2515685 chr17 | 17 | 40929350 | 41006614 | 77265  | 124 | 0.322835  | 0.011987 | 40928640 | 40930061 | 41006215 | 4100701: |
| 447 NA18942 | [2515685 chr17 | 17 | 41006614 | 41013689 | 7076   | 10  | -0.372963 | 0.048489 | 41006215 | 41007013 | 41013242 | 4101413: |
| 448 NA18942 | [2515685 chr17 | 17 | 41726243 | 41987438 | 261196 | 340 | 0.643876  | 0.005632 | 41725776 | 41726711 | 41987182 | 4198769! |
| 449 NA18942 | [2515685 chr17 | 17 | 41991727 | 42137413 | 145687 | 136 | 0.643876  | 0.005632 | 41991459 | 41991996 | 42135210 | 4214194! |
| 450 NA18942 | [2515685 chr17 | 17 | 42447536 | 42487040 | 39505  | 67  | 0.370185  | 0.016282 | 42447059 | 42448014 | 42486638 | 4248744: |
| 451 NA18942 | [2515685 chr17 | 17 | 42970703 | 42988804 | 18102  | 32  | -0.360272 | 0.026034 | 42970185 | 42971221 | 42988208 | 4298940! |
| 452 NA18942 | [2515685 chr17 | 17 | 42988804 | 43026670 | 37867  | 54  | 0.603655  | 0.02059  | 42988208 | 42989400 | 43025568 | 4302777: |
| 453 NA18942 | [2515685 chr17 | 17 | 54464638 | 54473156 | 8519   | 8   | -4.430854 | 0.128831 | 54464205 | 54465072 | 54472791 | 5447352: |
| 454 NA18942 | [2515685 chr17 | 17 | 57684203 | 57699598 | 15396  | 34  | 0.275599  | 0.023218 | 57683826 | 57684581 | 57699308 | 5769988! |
| 455 NA18942 | [2515685 chr17 | 17 | 60269002 | 60346613 | 77612  | 119 | 0.336672  | 0.012488 | 60268357 | 60269648 | 60345268 | 6034795! |
| 456 NA18942 | [2515685 chr17 | 17 | 60346613 | 60349141 | 2529   | 2   | -0.65658  | 0.110426 | 60345268 | 60347958 | 60348751 | 6034953: |
| 457 NA18942 | [2515685 chr17 | 17 | 75294896 | 75304766 | 9871   | 3   | 0.420626  | 0.078387 | 75294537 | 75295256 | 75303042 | 7530649! |
| 458 NA18942 | [2515685 chr18 | 18 | 9805250  | 9806206  | 957    | 2   | -0.874503 | 0.114816 | 9804637  | 9805863  | 9806038  | 980637-  |
| 459 NA18942 | [2515685 chr18 | 18 | 14479667 | 14489348 | 9682   | 14  | 0.451164  | 0.037504 | 14479249 | 14480086 | 14489152 | 1448954! |
| 460 NA18942 | [2515685 chr18 | 18 | 28142218 | 28143399 | 1182   | 2   | 0.740534  | 0.11861  | 28141854 | 28142583 | 28143055 | 2814374: |
| 461 NA18942 | [2515685 chr18 | 18 | 36514289 | 36521090 | 6802   | 6   | -3.397646 | 0.112353 | 36513759 | 36514820 | 36520512 | 3652166! |
| 462 NA18942 | [2515685 chr18 | 18 | 64896052 | 64907736 | 11685  | 13  | -0.857618 | 0.044724 | 64894789 | 64897315 | 64907228 | 6490824- |
| 463 NA18942 | [2515685 chr18 | 18 | 67647933 | 67687757 | 39825  | 3   | -0.361387 | 0.071271 | 67471918 | 67652523 | 67685165 | 6769034! |
| 464 NA18942 | [2515685 chr18 | 18 | 74230393 | 74234275 | 3883   | 31  | -0.419765 | 0.018893 | 74229835 | 74230952 | 74234139 | 7423441: |
| 465 NA18942 | [2515685 chr18 | 18 | 74392800 | 74397377 | 4578   | 3   | 0.911622  | 0.09877  | 74390826 | 74394774 | 74396965 | 7439779! |
| 466 NA18942 | [2515685 chr19 | 19 | 310414   | 312953   | 2540   | 14  | -0.46716  | 0.037454 | 309687   | 311142   | 312913   | 31299-   |

|             |                |    |          |          |        |     |           |          |           |          |          |          |
|-------------|----------------|----|----------|----------|--------|-----|-----------|----------|-----------|----------|----------|----------|
| 467 NA18942 | [2515685 chr19 | 19 | 8708780  | 8763535  | 54756  | 94  | -0.344904 | 0.011356 | 8708296   | 8709264  | 8763160  | 8763917  |
| 468 NA18942 | [2515685 chr19 | 19 | 23007899 | 23014812 | 6914   | 7   | 0.679458  | 0.061775 | 22990964  | 23010431 | 23014157 | 23015461 |
| 469 NA18942 | [2515685 chr19 | 19 | 39419837 | 39421349 | 1513   | 3   | 0.631853  | 0.095528 | 39419616  | 39420059 | 39421018 | 39421687 |
| 470 NA18942 | [2515685 chr19 | 19 | 41450182 | 41493617 | 43436  | 28  | -0.480341 | 0.023409 | 41421528  | 41452714 | 41491085 | 41497851 |
| 471 NA18942 | [2515685 chr19 | 19 | 41532761 | 41540854 | 8094   | 2   | 0.696041  | 0.114641 | 41532090  | 41533433 | 41538691 | 41543017 |
| 472 NA18942 | [2515685 chr19 | 19 | 42450468 | 42487512 | 37045  | 33  | -0.513847 | 0.020623 | 42413600  | 42453000 | 42486487 | 42488531 |
| 473 NA18942 | [2515685 chr19 | 19 | 42534740 | 42540352 | 5613   | 2   | -1.441527 | 0.12557  | 42530910  | 42537272 | 42537820 | 42544717 |
| 474 NA18942 | [2515685 chr19 | 19 | 45080439 | 45082201 | 1763   | 2   | 0.530876  | 0.093322 | 45080057  | 45080821 | 45081624 | 45082771 |
| 475 NA18942 | [2515685 chr19 | 19 | 45412775 | 45413556 | 782    | 2   | -0.540604 | 0.100041 | 45412566  | 45412985 | 45413285 | 45413827 |
| 476 NA18942 | [2515685 chr19 | 19 | 46043021 | 46072673 | 29653  | 33  | -0.377443 | 0.025727 | 46042747  | 46043295 | 46072511 | 46072831 |
| 477 NA18942 | [2515685 chr19 | 19 | 56788987 | 56795867 | 6881   | 7   | 0.286314  | 0.056193 | 56788678  | 56789297 | 56795672 | 56796607 |
| 478 NA18942 | [2515685 chr19 | 19 | 56824939 | 56841964 | 17026  | 20  | -0.646786 | 0.032993 | 56824709  | 56825170 | 56841608 | 56842327 |
| 479 NA18942 | [2515685 chr19 | 19 | 58169057 | 58171564 | 2508   | 2   | 0.61608   | 0.095458 | 58168791  | 58169324 | 58171021 | 58172107 |
| 480 NA18942 | [2515685 chr19 | 19 | 58209430 | 58245460 | 36031  | 28  | -0.767889 | 0.028055 | 58208997  | 58209863 | 58245024 | 58245891 |
| 481 NA18942 | [2515685 chr19 | 19 | 60958920 | 60976029 | 17110  | 15  | -0.552519 | 0.038193 | 60957933  | 60959907 | 60975748 | 60976311 |
| 482 NA18942 | [2515685 chr20 | 20 | 1511097  | 1532477  | 21381  | 26  | -2.574208 | 0.052777 | 1510534   | 1511660  | 1532182  | 1532773  |
| 483 NA18942 | [2515685 chr20 | 20 | 1533575  | 1544060  | 10486  | 15  | -0.330854 | 0.032671 | 1533384   | 1533766  | 1543588  | 1544533  |
| 484 NA18942 | [2515685 chr20 | 20 | 15249645 | 15251805 | 2161   | 2   | -0.821123 | 0.104399 | 152499381 | 15249909 | 15251287 | 15252327 |
| 485 NA18942 | [2515685 chr20 | 20 | 59951513 | 59957050 | 5538   | 18  | 0.686744  | 0.034196 | 59950681  | 59952345 | 59956538 | 59957567 |
| 486 NA18942 | [2515685 chr20 | 20 | 60843403 | 60845259 | 1857   | 3   | -0.595791 | 0.095049 | 60842942  | 60843864 | 60845073 | 60845441 |
| 487 NA18942 | [2515685 chr20 | 20 | 62066380 | 62068214 | 1835   | 8   | 1.885947  | 0.067806 | 62066146  | 62066615 | 62067671 | 62068751 |
| 488 NA18942 | [2515685 chr21 | 21 | 10175806 | 10202303 | 26498  | 20  | -0.263546 | 0.031237 | 10175546  | 10176067 | 10201954 | 10202657 |
| 489 NA18942 | [2515685 chr21 | 21 | 13885175 | 13890656 | 5482   | 5   | 0.361175  | 0.062859 | 13883019  | 13887331 | 13890340 | 13890977 |
| 490 NA18942 | [2515685 chr21 | 21 | 13948140 | 13957907 | 9768   | 14  | 0.434608  | 0.038625 | 13947936  | 13948345 | 13957512 | 13958307 |
| 491 NA18942 | [2515685 chr21 | 21 | 46881149 | 46882311 | 1163   | 3   | 0.40834   | 0.078359 | 46880965  | 46881333 | 46881964 | 46882651 |
| 492 NA18942 | [2515685 chr22 | 22 | 17032140 | 17129139 | 97000  | 146 | -0.256283 | 0.011053 | 17031480  | 17032801 | 17129821 | 17129451 |
| 493 NA18942 | [2515685 chr22 | 22 | 17225268 | 17249803 | 24536  | 57  | -0.257619 | 0.017555 | 17224868  | 17225668 | 17249433 | 17250177 |
| 494 NA18942 | [2515685 chr22 | 22 | 17396450 | 17397941 | 1492   | 3   | -0.701084 | 0.092355 | 17396301  | 17396599 | 17397517 | 17398361 |
| 495 NA18942 | [2515685 chr22 | 22 | 18706528 | 18995550 | 289023 | 286 | -0.261712 | 0.008117 | 18706356  | 18706700 | 18995355 | 18995741 |
| 496 NA18942 | [2515685 chr22 | 22 | 19380073 | 19419488 | 39416  | 12  | -0.307713 | 0.04302  | 19377752  | 19382395 | 19416806 | 19449921 |
| 497 NA18942 | [2515685 chr22 | 22 | 19838889 | 19880162 | 41274  | 66  | -0.272826 | 0.01614  | 19838698  | 19839080 | 19879848 | 19880471 |
| 498 NA18942 | [2515685 chr22 | 22 | 19978044 | 20121795 | 143752 | 214 | -0.252712 | 0.007231 | 19977587  | 19978502 | 20121548 | 20122047 |
| 499 NA18942 | [2515685 chr22 | 22 | 20135791 | 20243643 | 107853 | 150 | -0.252712 | 0.007231 | 20135502  | 20136081 | 20240961 | 20302287 |
| 500 NA18942 | [2515685 chr22 | 22 | 22600453 | 22604850 | 4398   | 2   | -3.099664 | 0.182797 | 22598667  | 22602240 | 22603026 | 22606671 |
| 501 NA18942 | [2515685 chr22 | 22 | 22611178 | 22615116 | 3939   | 3   | -0.556934 | 0.073934 | 22609725  | 22612631 | 22614886 | 22615347 |
| 502 NA18942 | [2515685 chr22 | 22 | 22683930 | 22688523 | 4594   | 3   | -2.974258 | 0.163244 | 22681309  | 22686552 | 22687378 | 22689661 |
| 503 NA18942 | [2515685 chr22 | 22 | 33619409 | 33622591 | 3183   | 4   | 0.956129  | 0.080576 | 33618939  | 33619879 | 33622541 | 33622647 |
| 504 NA18942 | [2515685 chr22 | 22 | 43790661 | 43878995 | 88335  | 3   | -0.545737 | 0.091925 | 43700090  | 43793343 | 43876436 | 43881551 |
| 1 NA12155   | [2515685 chr1  | 1  | 897      | 77845    | 76949  | 120 | 0.2952    | 0.013227 | 1         | 1794     | 77684    | 78006    |
| 2 NA12155   | [2515685 chr1  | 1  | 601042   | 612159   | 11118  | 8   | -1.03735  | 0.05466  | 587801    | 604315   | 610122   | 614196   |
| 3 NA12155   | [2515685 chr1  | 1  | 10416438 | 10418311 | 1874   | 2   | -0.865285 | 0.104461 | 10415863  | 10417014 | 10417712 | 10418917 |
| 4 NA12155   | [2515685 chr1  | 1  | 12843376 | 12848499 | 5124   | 7   | 0.551693  | 0.055525 | 12843104  | 12843649 | 12848229 | 12848761 |
| 5 NA12155   | [2515685 chr1  | 1  | 12893626 | 12932710 | 39085  | 86  | 0.319297  | 0.015237 | 12893265  | 12893988 | 12932422 | 12932991 |
| 6 NA12155   | [2515685 chr1  | 1  | 13114053 | 13165991 | 51939  | 113 | 0.303425  | 0.012969 | 13113809  | 13114298 | 13165683 | 13166301 |
| 7 NA12155   | [2515685 chr1  | 1  | 13300967 | 13373969 | 73003  | 41  | 0.324152  | 0.021071 | 13300595  | 13301339 | 13373608 | 13374337 |
| 8 NA12155   | [2515685 chr1  | 1  | 13380737 | 13382868 | 2132   | 3   | 0.673016  | 0.07228  | 13380415  | 13381060 | 13382574 | 13383167 |
| 9 NA12155   | [2515685 chr1  | 1  | 16793085 | 16794886 | 1802   | 3   | -0.715038 | 0.08814  | 16792521  | 16793650 | 16794708 | 16795061 |
| 10 NA12155  | [2515685 chr1  | 1  | 16828824 | 16832628 | 3805   | 8   | 0.28097   | 0.053482 | 16828560  | 16829088 | 16832358 | 16832891 |
| 11 NA12155  | [2515685 chr1  | 1  | 16866514 | 16869652 | 3139   | 5   | -0.441846 | 0.067831 | 16866271  | 16866757 | 16869397 | 16869901 |
| 12 NA12155  | [2515685 chr1  | 1  | 16942260 | 17007421 | 65162  | 68  | -0.350127 | 0.018151 | 16942213  | 16942308 | 17006449 | 17008397 |
| 13 NA12155  | [2515685 chr1  | 1  | 17011526 | 17014955 | 3430   | 3   | -0.490626 | 0.090203 | 17011088  | 17011964 | 17014224 | 17015687 |
| 14 NA12155  | [2515685 chr1  | 1  | 25330950 | 25409968 | 79019  | 78  | 0.416228  | 0.016781 | 25330662  | 25331238 | 25409763 | 25410177 |
| 15 NA12155  | [2515685 chr1  | 1  | 25434181 | 25487483 | 53303  | 27  | 0.329988  | 0.028594 | 25433990  | 25434373 | 25484210 | 25512937 |
| 16 NA12155  | [2515685 chr1  | 1  | 36271316 | 36286115 | 14800  | 7   | 0.2917    | 0.054873 | 36269520  | 36273113 | 36285830 | 36286401 |
| 17 NA12155  | [2515685 chr1  | 1  | 72478372 | 72524180 | 45809  | 36  | -2.752653 | 0.049784 | 72478140  | 72478604 | 72523661 | 72524701 |

|            |               |   |           |           |        |     |           |          |           |           |           |          |
|------------|---------------|---|-----------|-----------|--------|-----|-----------|----------|-----------|-----------|-----------|----------|
| 18 NA12155 | [2515685 chr1 | 1 | 89188117  | 89190762  | 2646   | 5   | 1.818057  | 0.102514 | 89187764  | 89188470  | 89190458  | 89191067 |
| 19 NA12155 | [2515685 chr1 | 1 | 103815525 | 103827497 | 11973  | 19  | 0.435497  | 0.035452 | 103815249 | 103815802 | 103827175 | 10382782 |
| 20 NA12155 | [2515685 chr1 | 1 | 103827497 | 103831020 | 3524   | 9   | -0.319646 | 0.048805 | 103827175 | 103827820 | 103830767 | 10383127 |
| 21 NA12155 | [2515685 chr1 | 1 | 103834166 | 103845839 | 11674  | 12  | 0.514116  | 0.04575  | 103833999 | 103834334 | 103842566 | 10385156 |
| 22 NA12155 | [2515685 chr1 | 1 | 103855134 | 103866317 | 11184  | 16  | -0.44795  | 0.038685 | 103855117 | 103855151 | 103865345 | 10386729 |
| 23 NA12155 | [2515685 chr1 | 1 | 103866317 | 103872982 | 6666   | 9   | 0.29589   | 0.053207 | 103865345 | 103867290 | 103872377 | 10387358 |
| 24 NA12155 | [2515685 chr1 | 1 | 103872982 | 104015739 | 142758 | 230 | -0.519607 | 0.009046 | 103872377 | 103873587 | 104013178 | 10401830 |
| 25 NA12155 | [2515685 chr1 | 1 | 111089464 | 111100714 | 11251  | 11  | -0.931485 | 0.052553 | 111088288 | 111090640 | 111100119 | 11110131 |
| 26 NA12155 | [2515685 chr1 | 1 | 116870606 | 116915240 | 44635  | 54  | 0.339253  | 0.020049 | 116869172 | 116872040 | 116914887 | 11691559 |
| 27 NA12155 | [2515685 chr1 | 1 | 120244720 | 120342422 | 97703  | 151 | 0.253837  | 0.011715 | 120243262 | 120246178 | 120342303 | 12034254 |
| 28 NA12155 | [2515685 chr1 | 1 | 120526937 | 120529698 | 2762   | 41  | 0.26013   | 0.022695 | 120526862 | 120527013 | 120529686 | 12052971 |
| 29 NA12155 | [2515685 chr1 | 1 | 141390474 | 141393235 | 2762   | 55  | 0.267456  | 0.019433 | 141390462 | 141390486 | 141393160 | 14139331 |
| 30 NA12155 | [2515685 chr1 | 1 | 141398478 | 141399546 | 1069   | 12  | 0.294284  | 0.042211 | 141398476 | 141398480 | 141399512 | 14139958 |
| 31 NA12155 | [2515685 chr1 | 1 | 141402840 | 141403151 | 312    | 11  | 0.304899  | 0.043214 | 141402828 | 141402852 | 141403146 | 14140315 |
| 32 NA12155 | [2515685 chr1 | 1 | 141911919 | 141927204 | 15286  | 26  | 0.26424   | 0.026558 | 141911695 | 141912144 | 141926807 | 14192760 |
| 33 NA12155 | [2515685 chr1 | 1 | 141964844 | 141981854 | 17011  | 50  | 0.337335  | 0.018713 | 141964740 | 141964948 | 141978581 | 14203010 |
| 34 NA12155 | [2515685 chr1 | 1 | 142312203 | 142317683 | 5481   | 15  | 0.305701  | 0.035093 | 142311884 | 142312522 | 142317020 | 14231834 |
| 35 NA12155 | [2515685 chr1 | 1 | 142438646 | 142569435 | 130790 | 159 | 0.329511  | 0.011631 | 142438189 | 142439104 | 142568775 | 14257009 |
| 36 NA12155 | [2515685 chr1 | 1 | 142678703 | 142758443 | 79741  | 133 | 0.25729   | 0.006678 | 142678583 | 142678823 | 142757786 | 14275910 |
| 37 NA12155 | [2515685 chr1 | 1 | 142761925 | 142857570 | 95646  | 294 | 0.25729   | 0.006678 | 142761553 | 142762297 | 142857225 | 14285791 |
| 38 NA12155 | [2515685 chr1 | 1 | 143504144 | 143508860 | 4717   | 13  | 0.312885  | 0.038606 | 143504033 | 143504255 | 143508499 | 14350922 |
| 39 NA12155 | [2515685 chr1 | 1 | 143681178 | 143690385 | 9208   | 19  | 0.317166  | 0.032423 | 143633943 | 143684451 | 143690115 | 14369065 |
| 40 NA12155 | [2515685 chr1 | 1 | 145043981 | 145055948 | 11968  | 20  | 0.258457  | 0.030276 | 145043870 | 145044092 | 145055551 | 14505634 |
| 41 NA12155 | [2515685 chr1 | 1 | 145091514 | 145131504 | 39991  | 107 | 0.286763  | 0.013102 | 145089695 | 145093333 | 145131349 | 14513165 |
| 42 NA12155 | [2515685 chr1 | 1 | 145368616 | 145373702 | 5087   | 10  | 0.306594  | 0.042567 | 145368296 | 145368936 | 145373422 | 14537398 |
| 43 NA12155 | [2515685 chr1 | 1 | 145383992 | 145400647 | 16656  | 40  | 0.297443  | 0.021198 | 145383814 | 145384171 | 145400362 | 14540093 |
| 44 NA12155 | [2515685 chr1 | 1 | 145530660 | 145535965 | 5306   | 12  | 0.311062  | 0.039448 | 145530340 | 145530980 | 145535466 | 14553646 |
| 45 NA12155 | [2515685 chr1 | 1 | 145546022 | 145562278 | 16257  | 38  | 0.313499  | 0.021785 | 145545844 | 145546201 | 145562162 | 14556239 |
| 46 NA12155 | [2515685 chr1 | 1 | 145819541 | 145821079 | 1539   | 2   | 0.965412  | 0.109593 | 145819262 | 145819821 | 145820633 | 14582152 |
| 47 NA12155 | [2515685 chr1 | 1 | 145821748 | 145839481 | 17734  | 19  | 0.41945   | 0.035119 | 145821525 | 145821972 | 145839093 | 14583986 |
| 48 NA12155 | [2515685 chr1 | 1 | 145922498 | 145951531 | 29034  | 35  | 0.492453  | 0.025357 | 145921149 | 145923848 | 145951467 | 14595159 |
| 49 NA12155 | [2515685 chr1 | 1 | 145965166 | 145967452 | 2287   | 3   | 0.604428  | 0.081485 | 145964647 | 145965685 | 145966729 | 14596817 |
| 50 NA12155 | [2515685 chr1 | 1 | 146091710 | 146157864 | 66155  | 19  | 0.33431   | 0.033684 | 146091319 | 146092102 | 146157650 | 14615807 |
| 51 NA12155 | [2515685 chr1 | 1 | 146326656 | 146339470 | 12815  | 41  | 0.352009  | 0.021115 | 146326478 | 146326834 | 146339246 | 14633969 |
| 52 NA12155 | [2515685 chr1 | 1 | 146789027 | 146789932 | 906    | 2   | 0.461147  | 0.089289 | 146788867 | 146789188 | 146789721 | 14679014 |
| 53 NA12155 | [2515685 chr1 | 1 | 148998878 | 149005918 | 7041   | 13  | 0.602382  | 0.037876 | 148998401 | 148999355 | 149004680 | 14900715 |
| 54 NA12155 | [2515685 chr1 | 1 | 149368571 | 149384391 | 15821  | 2   | -0.976934 | 0.109063 | 149368105 | 149369038 | 149383444 | 14938533 |
| 55 NA12155 | [2515685 chr1 | 1 | 149385742 | 149399435 | 13694  | 19  | -2.720721 | 0.067641 | 149385339 | 149386145 | 149399080 | 14939979 |
| 56 NA12155 | [2515685 chr1 | 1 | 158294538 | 158376771 | 82234  | 96  | -0.266857 | 0.014917 | 158294226 | 158294850 | 158376340 | 15837720 |
| 57 NA12155 | [2515685 chr1 | 1 | 159083853 | 159086136 | 2284   | 3   | 0.523448  | 0.090064 | 159083104 | 159084603 | 159085870 | 15908640 |
| 58 NA12155 | [2515685 chr1 | 1 | 186235299 | 186236496 | 1198   | 2   | 0.553699  | 0.095882 | 186235098 | 186235500 | 186236207 | 18623678 |
| 59 NA12155 | [2515685 chr1 | 1 | 193526999 | 193528128 | 1130   | 2   | -0.683339 | 0.129874 | 193526808 | 193527191 | 193527932 | 19352832 |
| 60 NA12155 | [2515685 chr1 | 1 | 203245415 | 203247868 | 2454   | 2   | 0.711317  | 0.116999 | 203245018 | 203245812 | 203247578 | 20324815 |
| 61 NA12155 | [2515685 chr1 | 1 | 233202665 | 233204956 | 2292   | 42  | -0.667236 | 0.021754 | 233202312 | 233203018 | 233204364 | 23320554 |
| 62 NA12155 | [2515685 chr1 | 1 | 234289921 | 234291988 | 2068   | 3   | 0.662469  | 0.09688  | 234289605 | 234290238 | 234291759 | 23429221 |
| 63 NA12155 | [2515685 chr1 | 1 | 236548084 | 236550206 | 2123   | 2   | -1.006456 | 0.11399  | 236547732 | 236548436 | 236549323 | 23655108 |
| 64 NA12155 | [2515685 chr1 | 1 | 236719047 | 236720968 | 1922   | 3   | -0.856803 | 0.091469 | 236718751 | 236719344 | 236720749 | 23672118 |
| 65 NA12155 | [2515685 chr2 | 2 | 1937645   | 1940045   | 2401   | 2   | 0.49747   | 0.095929 | 1936259   | 1939032   | 1939595   | 1940495  |
| 66 NA12155 | [2515685 chr2 | 2 | 4722540   | 4724061   | 1522   | 2   | 0.599868  | 0.101341 | 4722151   | 4722930   | 4723456   | 4724666  |
| 67 NA12155 | [2515685 chr2 | 2 | 13508038  | 13511508  | 3471   | 7   | -0.549369 | 0.060196 | 13507783  | 13508293  | 13510995  | 1351202  |
| 68 NA12155 | [2515685 chr2 | 2 | 13576435  | 13585968  | 9534   | 9   | -0.258494 | 0.04768  | 13576224  | 13576646  | 13585758  | 1358617  |
| 69 NA12155 | [2515685 chr2 | 2 | 34606439  | 34644770  | 38332  | 39  | -2.136726 | 0.042969 | 34601818  | 34609397  | 34641812  | 3464839  |
| 70 NA12155 | [2515685 chr2 | 2 | 35896472  | 35905937  | 9466   | 3   | -0.88052  | 0.087385 | 35879425  | 35899430  | 35902979  | 3590982  |
| 71 NA12155 | [2515685 chr2 | 2 | 36303416  | 36304826  | 1411   | 2   | -0.818536 | 0.137295 | 36303153  | 36303680  | 36304357  | 3630529  |
| 72 NA12155 | [2515685 chr2 | 2 | 51838599  | 51839736  | 1138   | 2   | -0.954098 | 0.130251 | 51838229  | 51838969  | 51839379  | 5184009  |

|             |               |   |           |           |        |     |           |          |           |           |           |          |
|-------------|---------------|---|-----------|-----------|--------|-----|-----------|----------|-----------|-----------|-----------|----------|
| 73 NA12155  | [2515685 chr2 | 2 | 57310466  | 57359197  | 48732  | 50  | 0.937524  | 0.023567 | 57310314  | 57310618  | 57358242  | 5736015: |
| 74 NA12155  | [2515685 chr2 | 2 | 73923306  | 73948487  | 25182  | 40  | 0.288946  | 0.020192 | 73923019  | 73923593  | 73948060  | 7394891: |
| 75 NA12155  | [2515685 chr2 | 2 | 75296507  | 75298934  | 2428   | 2   | 0.90406   | 0.106468 | 75296056  | 75296959  | 75298532  | 7529933: |
| 76 NA12155  | [2515685 chr2 | 2 | 76497148  | 76499758  | 2611   | 2   | -0.533033 | 0.101248 | 76496925  | 76497372  | 76499591  | 7649992: |
| 77 NA12155  | [2515685 chr2 | 2 | 91382835  | 91393586  | 10752  | 25  | 0.297329  | 0.028447 | 91382689  | 91382981  | 91392231  | 9139494: |
| 78 NA12155  | [2515685 chr2 | 2 | 94850556  | 94871889  | 21334  | 11  | 0.334975  | 0.04446  | 94850330  | 94850783  | 94869597  | 9487418: |
| 79 NA12155  | [2515685 chr2 | 2 | 94947481  | 94978008  | 30528  | 31  | 0.316747  | 0.02615  | 94946626  | 94948336  | 94977576  | 9497844: |
| 80 NA12155  | [2515685 chr2 | 2 | 97184386  | 97189740  | 5355   | 2   | -0.783808 | 0.101857 | 97182781  | 97185992  | 97186782  | 9719672: |
| 81 NA12155  | [2515685 chr2 | 2 | 97613796  | 97614932  | 1137   | 2   | 1.060368  | 0.127002 | 97613553  | 97614040  | 97614467  | 9761539: |
| 82 NA12155  | [2515685 chr2 | 2 | 106339466 | 106344320 | 4855   | 6   | -1.239234 | 0.08136  | 106339069 | 106339864 | 106344055 | 10634458 |
| 83 NA12155  | [2515685 chr2 | 2 | 108313968 | 108314875 | 908    | 2   | 0.676413  | 0.11508  | 108313664 | 108314272 | 108314680 | 10831507 |
| 84 NA12155  | [2515685 chr2 | 2 | 108373788 | 108375729 | 1942   | 2   | 1.061896  | 0.154839 | 108372980 | 108374597 | 108375394 | 10837606 |
| 85 NA12155  | [2515685 chr2 | 2 | 110044580 | 110088603 | 44024  | 48  | -0.255349 | 0.020702 | 110043995 | 110045166 | 110088459 | 11008874 |
| 86 NA12155  | [2515685 chr2 | 2 | 110590037 | 110634077 | 44041  | 40  | -0.264775 | 0.022492 | 110589893 | 110590182 | 110633492 | 11063466 |
| 87 NA12155  | [2515685 chr2 | 2 | 114028006 | 114028857 | 852    | 7   | 0.394386  | 0.058988 | 114027870 | 114028143 | 114028311 | 11402940 |
| 88 NA12155  | [2515685 chr2 | 2 | 126159437 | 126168349 | 8913   | 3   | -0.870162 | 0.088704 | 126158494 | 126160381 | 126168048 | 12616865 |
| 89 NA12155  | [2515685 chr2 | 2 | 127572316 | 127575298 | 2983   | 4   | 0.39194   | 0.068615 | 127571994 | 127572638 | 127575089 | 12757550 |
| 90 NA12155  | [2515685 chr2 | 2 | 130405520 | 130406599 | 1080   | 2   | -0.711282 | 0.100314 | 130405172 | 130405869 | 130406246 | 13040695 |
| 91 NA12155  | [2515685 chr2 | 2 | 130432409 | 130444724 | 12316  | 13  | -0.426901 | 0.038705 | 130432059 | 130432759 | 130442767 | 13044668 |
| 92 NA12155  | [2515685 chr2 | 2 | 130457091 | 130467050 | 9960   | 14  | -0.444176 | 0.041696 | 130456799 | 130457383 | 130466830 | 13046727 |
| 93 NA12155  | [2515685 chr2 | 2 | 130551722 | 130558596 | 6875   | 12  | -0.371697 | 0.040785 | 130551682 | 130551762 | 130558505 | 13055868 |
| 94 NA12155  | [2515685 chr2 | 2 | 130590215 | 130593482 | 3268   | 7   | -0.508384 | 0.057783 | 130589862 | 130590569 | 130593434 | 13059353 |
| 95 NA12155  | [2515685 chr2 | 2 | 130885569 | 130897796 | 12228  | 18  | -0.310652 | 0.033974 | 130885118 | 130886020 | 130897715 | 13089787 |
| 96 NA12155  | [2515685 chr2 | 2 | 130942733 | 130949950 | 7218   | 19  | -0.310143 | 0.03281  | 130942534 | 130942933 | 130949920 | 13094998 |
| 97 NA12155  | [2515685 chr2 | 2 | 131237403 | 131244619 | 7217   | 19  | -0.310143 | 0.03281  | 131237373 | 131237433 | 131244420 | 13124481 |
| 98 NA12155  | [2515685 chr2 | 2 | 131290822 | 131293816 | 2995   | 3   | -0.564656 | 0.085735 | 131288905 | 131292739 | 131293793 | 13129384 |
| 99 NA12155  | [2515685 chr2 | 2 | 131415651 | 131417381 | 1731   | 3   | 0.449268  | 0.079785 | 131415479 | 131415824 | 131417181 | 13141758 |
| 100 NA12155 | [2515685 chr2 | 2 | 131765076 | 131781010 | 15935  | 23  | -0.449683 | 0.030219 | 131749458 | 131768034 | 131780739 | 13178128 |
| 101 NA12155 | [2515685 chr2 | 2 | 131810915 | 131821383 | 10469  | 25  | -0.356004 | 0.030139 | 131810493 | 131811338 | 131821162 | 13182160 |
| 102 NA12155 | [2515685 chr2 | 2 | 131845027 | 131852310 | 7284   | 12  | -0.371697 | 0.040785 | 131844542 | 131845513 | 131852270 | 13185235 |
| 103 NA12155 | [2515685 chr2 | 2 | 131895231 | 131907608 | 12378  | 15  | -0.360576 | 0.03786  | 131894869 | 131895593 | 131907180 | 13190803 |
| 104 NA12155 | [2515685 chr2 | 2 | 131917827 | 131953962 | 36136  | 48  | -0.331273 | 0.021653 | 131917559 | 131918096 | 131953571 | 13195435 |
| 105 NA12155 | [2515685 chr2 | 2 | 132146137 | 132181874 | 35738  | 25  | -0.32169  | 0.009875 | 132145137 | 132147138 | 132181809 | 13218194 |
| 106 NA12155 | [2515685 chr2 | 2 | 132183435 | 132342919 | 159485 | 197 | -0.32169  | 0.009875 | 132183168 | 132183702 | 132342560 | 13234327 |
| 107 NA12155 | [2515685 chr2 | 2 | 132840764 | 132873598 | 32835  | 26  | 0.285188  | 0.02925  | 132799678 | 132843722 | 132873312 | 13287388 |
| 108 NA12155 | [2515685 chr2 | 2 | 146694140 | 146710744 | 16605  | 17  | -2.749065 | 0.078659 | 146688620 | 146697098 | 146710557 | 14671093 |
| 109 NA12155 | [2515685 chr2 | 2 | 153495545 | 153499409 | 3865   | 2   | 0.698916  | 0.124611 | 153484545 | 153498503 | 153498846 | 15349997 |
| 110 NA12155 | [2515685 chr2 | 2 | 153622711 | 153625256 | 2546   | 3   | -3.859935 | 0.201469 | 153621175 | 153624247 | 153625088 | 15362542 |
| 111 NA12155 | [2515685 chr2 | 2 | 208176479 | 208184457 | 7979   | 7   | 0.944128  | 0.062462 | 208176093 | 208176865 | 208183930 | 20818498 |
| 112 NA12155 | [2515685 chr2 | 2 | 228483428 | 228730812 | 247385 | 6   | -0.292557 | 0.056272 | 228405414 | 228486386 | 228730139 | 22873148 |
| 113 NA12155 | [2515685 chr2 | 2 | 242455712 | 242486271 | 30560  | 49  | 0.258979  | 0.02068  | 242455466 | 242455959 | 242486093 | 24248645 |
| 114 NA12155 | [2515685 chr3 | 3 | 149944    | 152369    | 2426   | 4   | -0.410746 | 0.07513  | 148712    | 151176    | 151848    | 152890   |
| 115 NA12155 | [2515685 chr3 | 3 | 204650    | 209394    | 4745   | 4   | 0.682738  | 0.076325 | 202918    | 206383    | 209009    | 209775   |
| 116 NA12155 | [2515685 chr3 | 3 | 587432    | 638425    | 50994  | 44  | -0.420589 | 0.02227  | 586921    | 587943    | 638149    | 638701   |
| 117 NA12155 | [2515685 chr3 | 3 | 1282960   | 1284261   | 1302   | 2   | -0.533375 | 0.105634 | 1282730   | 1283190   | 1283881   | 128464   |
| 118 NA12155 | [2515685 chr3 | 3 | 1757211   | 1765711   | 8501   | 2   | 0.936412  | 0.123975 | 1756096   | 1758327   | 1762058   | 179730   |
| 119 NA12155 | [2515685 chr3 | 3 | 14939575  | 14940760  | 1186   | 2   | 0.560129  | 0.10145  | 14939303  | 14939847  | 14940427  | 1494109  |
| 120 NA12155 | [2515685 chr3 | 3 | 68821474  | 68830847  | 9374   | 17  | -2.432208 | 0.066459 | 68818894  | 68824055  | 68830417  | 6883127  |
| 121 NA12155 | [2515685 chr3 | 3 | 76066312  | 76081451  | 15140  | 19  | -0.262347 | 0.033673 | 76065787  | 76066838  | 76081180  | 7608172  |
| 122 NA12155 | [2515685 chr3 | 3 | 76861449  | 76863483  | 2035   | 9   | 0.25257   | 0.04265  | 76860987  | 76861912  | 76862761  | 7686420  |
| 123 NA12155 | [2515685 chr3 | 3 | 100422909 | 100432540 | 9632   | 7   | -0.967401 | 0.06217  | 100419669 | 100426149 | 100431494 | 10043358 |
| 124 NA12155 | [2515685 chr3 | 3 | 105760262 | 105762355 | 2094   | 2   | -0.906628 | 0.126207 | 105759634 | 105760890 | 105761424 | 10576328 |
| 125 NA12155 | [2515685 chr3 | 3 | 127153753 | 127158873 | 5121   | 9   | -0.388307 | 0.048032 | 127153587 | 127153920 | 127158237 | 12715950 |
| 126 NA12155 | [2515685 chr3 | 3 | 131158017 | 131162914 | 4898   | 4   | 0.406157  | 0.081058 | 131157466 | 131158568 | 131162725 | 13116310 |
| 127 NA12155 | [2515685 chr3 | 3 | 131204575 | 131207291 | 2717   | 5   | 0.388592  | 0.064881 | 131204147 | 131205003 | 131206953 | 13120762 |



|             |               |   |           |           |        |     |           |          |           |           |           |          |
|-------------|---------------|---|-----------|-----------|--------|-----|-----------|----------|-----------|-----------|-----------|----------|
| 128 NA12155 | [2515685 chr3 | 3 | 131312746 | 131313869 | 1124   | 3   | 0.382879  | 0.075103 | 131312529 | 131312963 | 131313449 | 13131428 |
| 129 NA12155 | [2515685 chr3 | 3 | 133191392 | 133196576 | 5185   | 5   | -0.877101 | 0.068129 | 133190820 | 133191965 | 133195824 | 13319732 |
| 130 NA12155 | [2515685 chr3 | 3 | 163994592 | 164106273 | 111682 | 89  | 3.366586  | 0.033732 | 163993392 | 163995793 | 164106029 | 16410651 |
| 131 NA12155 | [2515685 chr3 | 3 | 164106273 | 164108999 | 2727   | 2   | 1.185321  | 0.129643 | 164106029 | 164106517 | 164108018 | 16410998 |
| 132 NA12155 | [2515685 chr3 | 3 | 164199936 | 164205886 | 5951   | 6   | -0.75601  | 0.07543  | 164199686 | 164200187 | 164200674 | 16420709 |
| 133 NA12155 | [2515685 chr3 | 3 | 164228031 | 164230706 | 2676   | 4   | 0.360663  | 0.071729 | 164227023 | 164229039 | 164230311 | 16423110 |
| 134 NA12155 | [2515685 chr3 | 3 | 174722190 | 174773561 | 51372  | 40  | 0.527699  | 0.024406 | 174721903 | 174722477 | 174773035 | 17477408 |
| 135 NA12155 | [2515685 chr3 | 3 | 176561952 | 176567506 | 5555   | 5   | -0.800634 | 0.073496 | 176560250 | 176563654 | 176565991 | 17656902 |
| 136 NA12155 | [2515685 chr3 | 3 | 191219813 | 191223326 | 3514   | 4   | 0.877296  | 0.079809 | 191219291 | 191220336 | 191222918 | 19122373 |
| 137 NA12155 | [2515685 chr3 | 3 | 192547312 | 192554331 | 7020   | 9   | 0.942971  | 0.055936 | 192546950 | 192547674 | 192554127 | 19255453 |
| 138 NA12155 | [2515685 chr3 | 3 | 196943833 | 196965802 | 21970  | 18  | -0.472232 | 0.035735 | 196943538 | 196944128 | 196965494 | 19696611 |
| 139 NA12155 | [2515685 chr3 | 3 | 196994475 | 197002965 | 8491   | 10  | 1.175278  | 0.049276 | 196994054 | 196994896 | 197002044 | 19700388 |
| 140 NA12155 | [2515685 chr3 | 3 | 197905668 | 197907374 | 1707   | 2   | 0.453488  | 0.090602 | 197905463 | 197905873 | 197905689 | 19790815 |
| 141 NA12155 | [2515685 chr3 | 3 | 198421889 | 198427408 | 5520   | 3   | 0.763397  | 0.091435 | 198421397 | 198422381 | 198423959 | 19843085 |
| 142 NA12155 | [2515685 chr3 | 3 | 198674426 | 198675470 | 1045   | 6   | -0.586478 | 0.052811 | 198674161 | 198674692 | 198674903 | 19867603 |
| 143 NA12155 | [2515685 chr3 | 3 | 199313925 | 199321616 | 7692   | 16  | -0.455747 | 0.034899 | 199313515 | 199314336 | 199321283 | 19932194 |
| 144 NA12155 | [2515685 chr4 | 4 | 6470038   | 6471884   | 1847   | 2   | 0.603708  | 0.096625 | 6469722   | 6470355   | 6471399   | 6472365  |
| 145 NA12155 | [2515685 chr4 | 4 | 8740317   | 8756949   | 16633  | 25  | 0.635     | 0.025828 | 8740049   | 8740586   | 8756813   | 8757086  |
| 146 NA12155 | [2515685 chr4 | 4 | 8998172   | 9046719   | 48548  | 87  | 1.067825  | 0.01386  | 8850774   | 9001243   | 9046129   | 9047305  |
| 147 NA12155 | [2515685 chr4 | 4 | 9812346   | 9813108   | 763    | 33  | 0.820907  | 0.021793 | 9812284   | 9812408   | 9812952   | 9813265  |
| 148 NA12155 | [2515685 chr4 | 4 | 9887220   | 9911397   | 24178  | 31  | 2.377086  | 0.053334 | 9886886   | 9887555   | 9910388   | 9912407  |
| 149 NA12155 | [2515685 chr4 | 4 | 34602797  | 34650994  | 48198  | 45  | 0.829011  | 0.025947 | 34601994  | 34603600  | 34649535  | 3465245  |
| 150 NA12155 | [2515685 chr4 | 4 | 49080370  | 49080998  | 629    | 3   | -0.61987  | 0.087775 | 49079937  | 49080803  | 49080923  | 4908107  |
| 151 NA12155 | [2515685 chr4 | 4 | 49400450  | 49400601  | 152    | 2   | -0.689958 | 0.10414  | 49400386  | 49400515  | 49400516  | 4940068  |
| 152 NA12155 | [2515685 chr4 | 4 | 64522941  | 64543857  | 20917  | 20  | -0.9052   | 0.041881 | 64522682  | 64523201  | 64542552  | 6454516  |
| 153 NA12155 | [2515685 chr4 | 4 | 69202095  | 69319814  | 117720 | 72  | 1.05246   | 0.025934 | 69201955  | 69202236  | 69319569  | 6932005  |
| 154 NA12155 | [2515685 chr4 | 4 | 69319814  | 69368483  | 48670  | 45  | 0.302622  | 0.020517 | 69319569  | 69320059  | 69365412  | 6938219  |
| 155 NA12155 | [2515685 chr4 | 4 | 69670832  | 69720493  | 49662  | 56  | 0.279017  | 0.019094 | 69670364  | 69671301  | 69717422  | 6973421  |
| 156 NA12155 | [2515685 chr4 | 4 | 70306339  | 70324924  | 18586  | 14  | 0.365482  | 0.015366 | 70306109  | 70306570  | 70324680  | 7032516  |
| 157 NA12155 | [2515685 chr4 | 4 | 70329576  | 70416062  | 86487  | 84  | 0.365482  | 0.015366 | 70329375  | 70329777  | 70415760  | 7041636  |
| 158 NA12155 | [2515685 chr4 | 4 | 115534205 | 115541546 | 7342   | 9   | 0.884568  | 0.0594   | 115530015 | 115537276 | 115539984 | 11554310 |
| 159 NA12155 | [2515685 chr4 | 4 | 115865203 | 115869486 | 4284   | 3   | -1.013254 | 0.108192 | 115864913 | 115865494 | 115866415 | 11587556 |
| 160 NA12155 | [2515685 chr4 | 4 | 116524394 | 116534652 | 10259  | 12  | -0.961196 | 0.048317 | 116523990 | 116524798 | 116534384 | 11653492 |
| 161 NA12155 | [2515685 chr4 | 4 | 124835704 | 124837199 | 1496   | 3   | -0.589752 | 0.094812 | 124835418 | 124835991 | 124836924 | 12483747 |
| 162 NA12155 | [2515685 chr4 | 4 | 133536187 | 133540723 | 4537   | 3   | -0.879988 | 0.113072 | 133531398 | 133539258 | 133540462 | 13354098 |
| 163 NA12155 | [2515685 chr4 | 4 | 138537751 | 138549906 | 12156  | 14  | 0.897866  | 0.048636 | 138537443 | 138538059 | 138547414 | 13855239 |
| 164 NA12155 | [2515685 chr4 | 4 | 142588136 | 142590500 | 2365   | 4   | -0.852654 | 0.082783 | 142587774 | 142588498 | 142590303 | 14259069 |
| 165 NA12155 | [2515685 chr4 | 4 | 162237272 | 162242562 | 5291   | 8   | 0.891687  | 0.060724 | 162236487 | 162238058 | 162242381 | 16224274 |
| 166 NA12155 | [2515685 chr4 | 4 | 162806038 | 162809269 | 3232   | 3   | 0.970573  | 0.091014 | 162804872 | 162807204 | 162808734 | 16280980 |
| 167 NA12155 | [2515685 chr4 | 4 | 169184442 | 169368370 | 183929 | 160 | 0.836253  | 0.013388 | 169184090 | 169184794 | 169366713 | 16937002 |
| 168 NA12155 | [2515685 chr4 | 4 | 173363594 | 173367718 | 4125   | 6   | -3.803817 | 0.133857 | 173362583 | 173364606 | 173367283 | 17336815 |
| 169 NA12155 | [2515685 chr4 | 4 | 183944886 | 183947025 | 2140   | 3   | -0.915123 | 0.090725 | 183944291 | 183945482 | 183946755 | 18394729 |
| 170 NA12155 | [2515685 chr4 | 4 | 185533276 | 185544849 | 11574  | 12  | 0.85836   | 0.048677 | 185532696 | 185533857 | 185543276 | 18554642 |
| 171 NA12155 | [2515685 chr4 | 4 | 187728494 | 187732907 | 4414   | 15  | 2.702861  | 0.061182 | 187728193 | 187728795 | 187732541 | 18773327 |
| 172 NA12155 | [2515685 chr4 | 4 | 190528602 | 190533163 | 4562   | 21  | -0.910316 | 0.035526 | 190528058 | 190529146 | 190531664 | 19053466 |
| 173 NA12155 | [2515685 chr4 | 4 | 190845771 | 191059687 | 213917 | 220 | 0.319262  | 0.009863 | 190845056 | 190846486 | 191059242 | 19106013 |
| 174 NA12155 | [2515685 chr4 | 4 | 191142404 | 191143596 | 1193   | 3   | -0.437516 | 0.084732 | 191142135 | 191142673 | 191143215 | 19114397 |
| 175 NA12155 | [2515685 chr5 | 5 | 261631    | 263283    | 1653   | 9   | 0.553973  | 0.053342 | 261032    | 262230    | 262766    | 263801   |
| 176 NA12155 | [2515685 chr5 | 5 | 729565    | 870418    | 140854 | 127 | 0.379012  | 0.00682  | 729285    | 729845    | 870093    | 870744   |
| 177 NA12155 | [2515685 chr5 | 5 | 876114    | 1135384   | 259271 | 320 | 0.379012  | 0.00682  | 875088    | 877140    | 1135081   | 1135688  |
| 178 NA12155 | [2515685 chr5 | 5 | 1231558   | 1233247   | 1690   | 2   | -0.894473 | 0.105428 | 1231167   | 1231949   | 1232879   | 1233615  |
| 179 NA12155 | [2515685 chr5 | 5 | 12863961  | 12873512  | 9552   | 14  | -0.986677 | 0.050794 | 12863778  | 12864144  | 12873198  | 1287382  |
| 180 NA12155 | [2515685 chr5 | 5 | 21314653  | 21406258  | 91606  | 138 | -0.30872  | 0.011867 | 21314281  | 21315025  | 21405983  | 2140653  |
| 181 NA12155 | [2515685 chr5 | 5 | 21513408  | 21517092  | 3685   | 7   | -0.435678 | 0.053127 | 21513105  | 21513711  | 21516899  | 2151728  |
| 182 NA12155 | [2515685 chr5 | 5 | 21539892  | 21546205  | 6314   | 17  | -0.376477 | 0.033768 | 21539883  | 21539901  | 21545559  | 2154685  |

|             |               |   |           |           |        |      |           |          |           |           |           |           |
|-------------|---------------|---|-----------|-----------|--------|------|-----------|----------|-----------|-----------|-----------|-----------|
| 183 NA12155 | [2515685 chr5 | 5 | 21971730  | 22049242  | 77513  | 120  | -0.35536  | 0.01325  | 21971258  | 21972202  | 22048833  | 2204965:  |
| 184 NA12155 | [2515685 chr5 | 5 | 26831997  | 26837938  | 5942   | 6    | 0.784568  | 0.071801 | 26829858  | 26834136  | 26837469  | 2683840:  |
| 185 NA12155 | [2515685 chr5 | 5 | 34217309  | 34292673  | 75365  | 137  | -0.260764 | 0.01182  | 34217201  | 34217417  | 34291585  | 3429376:  |
| 186 NA12155 | [2515685 chr5 | 5 | 61547004  | 61584623  | 37620  | 35   | -0.264284 | 0.024327 | 61546192  | 61547816  | 61583848  | 6158539:  |
| 187 NA12155 | [2515685 chr5 | 5 | 68865200  | 68886836  | 21637  | 45   | 0.436599  | 0.02362  | 68864770  | 68865630  | 68886492  | 6888718:  |
| 188 NA12155 | [2515685 chr5 | 5 | 68948510  | 69741492  | 792983 | 1654 | -0.279528 | 0.002247 | 68948219  | 68948802  | 69741346  | 6974163:  |
| 189 NA12155 | [2515685 chr5 | 5 | 69803645  | 70336822  | 533178 | 1009 | -0.279528 | 0.002247 | 69803354  | 69803937  | 70336531  | 7033711:  |
| 190 NA12155 | [2515685 chr5 | 5 | 70435095  | 70696078  | 260984 | 567  | -0.279528 | 0.002247 | 70435070  | 70435120  | 70695658  | 7069649:  |
| 191 NA12155 | [2515685 chr5 | 5 | 81459210  | 81466058  | 6849   | 2    | -1.492357 | 0.126302 | 81455614  | 81462405  | 81462863  | 8147028:  |
| 192 NA12155 | [2515685 chr5 | 5 | 97427204  | 97428353  | 1150   | 2    | 1.016035  | 0.119121 | 97426913  | 97427496  | 97428177  | 9742852:  |
| 193 NA12155 | [2515685 chr5 | 5 | 98882118  | 98896998  | 14881  | 24   | -0.254835 | 0.030187 | 98881808  | 98882429  | 98896485  | 9889751:  |
| 194 NA12155 | [2515685 chr5 | 5 | 99409393  | 99419037  | 9645   | 13   | -0.43028  | 0.041686 | 99408997  | 99409789  | 99418328  | 9941974:  |
| 195 NA12155 | [2515685 chr5 | 5 | 99745397  | 99760813  | 15417  | 27   | -0.268553 | 0.028051 | 99745034  | 99745760  | 99760559  | 9976106:  |
| 196 NA12155 | [2515685 chr5 | 5 | 115528114 | 115536700 | 8587   | 2    | -0.710725 | 0.114903 | 115526586 | 115529642 | 115536144 | 11553725: |
| 197 NA12155 | [2515685 chr5 | 5 | 122649189 | 122651412 | 2224   | 3    | -0.715173 | 0.093749 | 122648933 | 122649446 | 122650032 | 12265279: |
| 198 NA12155 | [2515685 chr5 | 5 | 137835178 | 137844134 | 8957   | 8    | 0.627228  | 0.060405 | 137834745 | 137835611 | 137843310 | 13784495: |
| 199 NA12155 | [2515685 chr5 | 5 | 140203081 | 140217091 | 14011  | 18   | 2.643749  | 0.068214 | 140202344 | 140203819 | 140216552 | 14021763: |
| 200 NA12155 | [2515685 chr5 | 5 | 140217091 | 140218928 | 1838   | 2    | 1.189403  | 0.130406 | 140216552 | 140217631 | 140218508 | 14021934: |
| 201 NA12155 | [2515685 chr5 | 5 | 140534849 | 140540106 | 5258   | 5    | 0.85211   | 0.06997  | 140534700 | 140534999 | 140539007 | 14054120: |
| 202 NA12155 | [2515685 chr5 | 5 | 165157996 | 165161604 | 3609   | 2    | -0.879929 | 0.129276 | 165155280 | 165160712 | 165160802 | 16516240: |
| 203 NA12155 | [2515685 chr5 | 5 | 175549076 | 175554481 | 5406   | 8    | 0.271387  | 0.050005 | 175548728 | 175549424 | 175554034 | 17555492: |
| 204 NA12155 | [2515685 chr5 | 5 | 179650604 | 179664720 | 14117  | 14   | 0.252109  | 0.04076  | 179650330 | 179650878 | 179664447 | 17966499: |
| 205 NA12155 | [2515685 chr5 | 5 | 180309823 | 180363417 | 53595  | 51   | -0.976785 | 0.027533 | 180309690 | 180309956 | 180363120 | 18036371: |
| 206 NA12155 | [2515685 chr6 | 6 | 201823    | 233994    | 32172  | 22   | -0.5724   | 0.03316  | 201415    | 202232    | 233746    | 234242    |
| 207 NA12155 | [2515685 chr6 | 6 | 237270    | 240929    | 3660   | 3    | -0.451233 | 0.086899 | 236563    | 237978    | 240278    | 241581    |
| 208 NA12155 | [2515685 chr6 | 6 | 240929    | 327656    | 86728  | 99   | 0.337281  | 0.014761 | 240278    | 241581    | 326993    | 328320    |
| 209 NA12155 | [2515685 chr6 | 6 | 26963575  | 27078943  | 115369 | 183  | -0.267629 | 0.01049  | 26963440  | 26963711  | 27078543  | 2707934:  |
| 210 NA12155 | [2515685 chr6 | 6 | 29954251  | 30015556  | 61306  | 53   | 0.569466  | 0.021847 | 29950833  | 29957670  | 30014305  | 3001680:  |
| 211 NA12155 | [2515685 chr6 | 6 | 30050873  | 30053173  | 2301   | 6    | 0.408318  | 0.058192 | 30050514  | 30051232  | 30053025  | 3005332:  |
| 212 NA12155 | [2515685 chr6 | 6 | 30760824  | 30763127  | 2304   | 3    | 0.514624  | 0.085299 | 30760078  | 30761571  | 30762846  | 3076340:  |
| 213 NA12155 | [2515685 chr6 | 6 | 31346265  | 31348122  | 1858   | 3    | 0.430952  | 0.082174 | 31345931  | 31346599  | 31347941  | 3134830:  |
| 214 NA12155 | [2515685 chr6 | 6 | 31365231  | 31367326  | 2096   | 2    | 0.681736  | 0.105955 | 31364305  | 31366158  | 31366773  | 3136787:  |
| 215 NA12155 | [2515685 chr6 | 6 | 31378825  | 31380815  | 1991   | 2    | -0.580587 | 0.115918 | 31377784  | 31379867  | 31380220  | 3138141:  |
| 216 NA12155 | [2515685 chr6 | 6 | 32538780  | 32547042  | 8263   | 4    | -0.407141 | 0.077672 | 32538477  | 32539084  | 32546557  | 3254752:  |
| 217 NA12155 | [2515685 chr6 | 6 | 32564602  | 32586862  | 22261  | 4    | -0.855985 | 0.155059 | 32564316  | 32564888  | 32586127  | 3258759:  |
| 218 NA12155 | [2515685 chr6 | 6 | 32589957  | 32591649  | 1693   | 3    | -0.900472 | 0.09375  | 32589338  | 32590576  | 32591403  | 3259189:  |
| 219 NA12155 | [2515685 chr6 | 6 | 32605125  | 32605958  | 834    | 2    | -0.968899 | 0.125081 | 32604923  | 32605328  | 32605760  | 3260615:  |
| 220 NA12155 | [2515685 chr6 | 6 | 32653862  | 32655482  | 1621   | 3    | 1.178322  | 0.157111 | 32653679  | 32654046  | 32654980  | 3265598:  |
| 221 NA12155 | [2515685 chr6 | 6 | 32678696  | 32680751  | 2056   | 3    | 0.630804  | 0.095525 | 32678507  | 32678885  | 32680547  | 3268095:  |
| 222 NA12155 | [2515685 chr6 | 6 | 32738827  | 32741383  | 2557   | 4    | 0.684327  | 0.084367 | 32738491  | 32739164  | 32741135  | 3274163:  |
| 223 NA12155 | [2515685 chr6 | 6 | 32744343  | 32749226  | 4884   | 3    | -0.530566 | 0.092726 | 32744136  | 32744550  | 32745721  | 3275666:  |
| 224 NA12155 | [2515685 chr6 | 6 | 35862833  | 35874426  | 11594  | 13   | 0.511954  | 0.041307 | 35862530  | 35863136  | 35873957  | 3587489:  |
| 225 NA12155 | [2515685 chr6 | 6 | 47426244  | 47427505  | 1262   | 2    | 0.526951  | 0.103747 | 47425978  | 47426511  | 47427046  | 4742796:  |
| 226 NA12155 | [2515685 chr6 | 6 | 54036900  | 54042384  | 5485   | 5    | 3.588309  | 0.169905 | 54036573  | 54037227  | 54041771  | 5404299:  |
| 227 NA12155 | [2515685 chr6 | 6 | 58364952  | 58377793  | 12842  | 19   | -0.2795   | 0.033111 | 58364614  | 58365290  | 58377554  | 5837803:  |
| 228 NA12155 | [2515685 chr6 | 6 | 78325240  | 78328478  | 3239   | 4    | -0.441116 | 0.071255 | 78324990  | 78325490  | 78328067  | 7832888:  |
| 229 NA12155 | [2515685 chr6 | 6 | 79023318  | 79093263  | 69946  | 70   | 0.879515  | 0.01996  | 79022028  | 79024609  | 79091909  | 7909461:  |
| 230 NA12155 | [2515685 chr6 | 6 | 120671191 | 120671916 | 726    | 2    | 1.384133  | 0.119323 | 120670696 | 120671686 | 120671725 | 12067210: |
| 231 NA12155 | [2515685 chr6 | 6 | 160997684 | 160999879 | 2196   | 3    | 0.505551  | 0.093137 | 160997465 | 160997903 | 160999261 | 16100049: |
| 232 NA12155 | [2515685 chr6 | 6 | 161001907 | 161038819 | 36913  | 63   | 0.600176  | 0.016319 | 161001167 | 161002648 | 161038605 | 16103903: |
| 233 NA12155 | [2515685 chr6 | 6 | 167766889 | 167776315 | 9427   | 18   | 0.288158  | 0.035292 | 167766568 | 167767211 | 167776063 | 16777656: |
| 234 NA12155 | [2515685 chr6 | 6 | 168535543 | 168537360 | 1818   | 12   | 0.297286  | 0.03614  | 168535263 | 168535824 | 168537100 | 16853762: |
| 235 NA12155 | [2515685 chr6 | 6 | 170522124 | 170523925 | 1802   | 3    | 0.467083  | 0.085137 | 170521802 | 170522447 | 170523613 | 17052423: |
| 236 NA12155 | [2515685 chr6 | 6 | 170545332 | 170548372 | 3041   | 5    | 0.31225   | 0.059573 | 170545091 | 170545573 | 170548088 | 17054865: |
| 237 NA12155 | [2515685 chr6 | 6 | 170603879 | 170604666 | 788    | 2    | -2.360261 | 0.134596 | 170603541 | 170604217 | 170604339 | 17060499: |

|             |               |   |           |           |        |     |           |          |           |           |           |           |
|-------------|---------------|---|-----------|-----------|--------|-----|-----------|----------|-----------|-----------|-----------|-----------|
| 238 NA12155 | [2515685 chr6 | 6 | 170625506 | 170627028 | 1523   | 3   | 1.699392  | 0.117794 | 170625015 | 170625997 | 170626579 | 17062747  |
| 239 NA12155 | [2515685 chr7 | 7 | 113212    | 116416    | 3205   | 14  | -0.291072 | 0.04295  | 113146    | 113279    | 116290    | 116543    |
| 240 NA12155 | [2515685 chr7 | 7 | 1084125   | 1086660   | 2536   | 15  | 0.80129   | 0.038224 | 1083752   | 1084499   | 1085871   | 1087445   |
| 241 NA12155 | [2515685 chr7 | 7 | 3384111   | 3392459   | 8349   | 8   | 0.94445   | 0.058976 | 3383451   | 3384772   | 3390107   | 3395611   |
| 242 NA12155 | [2515685 chr7 | 7 | 37644779  | 37926067  | 281289 | 6   | -0.352785 | 0.057584 | 37643332  | 37646226  | 37923715  | 37983327  |
| 243 NA12155 | [2515685 chr7 | 7 | 43773800  | 43943926  | 170127 | 112 | 0.262665  | 0.013074 | 43773256  | 43774344  | 43941574  | 44020061  |
| 244 NA12155 | [2515685 chr7 | 7 | 56653611  | 56668797  | 15187  | 11  | 0.434057  | 0.039859 | 56653051  | 56654171  | 56668252  | 56669341  |
| 245 NA12155 | [2515685 chr7 | 7 | 62124270  | 62128473  | 4204   | 13  | -0.304538 | 0.042899 | 62124190  | 62124350  | 62128063  | 62128881  |
| 246 NA12155 | [2515685 chr7 | 7 | 62423752  | 62431487  | 7736   | 19  | -0.337946 | 0.035705 | 62423322  | 62424183  | 62431266  | 62431701  |
| 247 NA12155 | [2515685 chr7 | 7 | 62654114  | 62670115  | 16002  | 8   | 0.460841  | 0.044262 | 62653036  | 62655193  | 62667763  | 62673261  |
| 248 NA12155 | [2515685 chr7 | 7 | 64033071  | 64045487  | 12417  | 36  | -0.374426 | 0.024327 | 64032865  | 64033278  | 64045069  | 64045901  |
| 249 NA12155 | [2515685 chr7 | 7 | 64162316  | 64165981  | 3666   | 3   | 0.605128  | 0.111275 | 64160143  | 64164489  | 64165654  | 64166301  |
| 250 NA12155 | [2515685 chr7 | 7 | 64464087  | 64479903  | 15817  | 43  | -0.320971 | 0.022322 | 64463669  | 64464506  | 64479522  | 64480281  |
| 251 NA12155 | [2515685 chr7 | 7 | 64540847  | 64556662  | 15816  | 45  | -0.332338 | 0.021633 | 64540466  | 64541228  | 64556244  | 64557081  |
| 252 NA12155 | [2515685 chr7 | 7 | 69866390  | 69869623  | 3234   | 4   | 0.885023  | 0.086484 | 69865412  | 69867368  | 69869269  | 69869971  |
| 253 NA12155 | [2515685 chr7 | 7 | 69869623  | 69871056  | 1434   | 2   | 3.835114  | 0.199223 | 69869269  | 69869978  | 69870420  | 69871169  |
| 254 NA12155 | [2515685 chr7 | 7 | 71963931  | 71968948  | 5018   | 16  | 0.276395  | 0.031678 | 71963675  | 71964187  | 71968772  | 71969121  |
| 255 NA12155 | [2515685 chr7 | 7 | 74142975  | 74146505  | 3531   | 13  | 0.302684  | 0.035243 | 74142799  | 74143151  | 74146336  | 74146671  |
| 256 NA12155 | [2515685 chr7 | 7 | 74557218  | 74560769  | 3552   | 13  | 0.302684  | 0.035243 | 74557021  | 74557415  | 74560600  | 74560931  |
| 257 NA12155 | [2515685 chr7 | 7 | 74585259  | 74588792  | 3534   | 13  | 0.302684  | 0.035243 | 74585083  | 74585435  | 74588623  | 74588961  |
| 258 NA12155 | [2515685 chr7 | 7 | 74613282  | 74616811  | 3530   | 13  | 0.302684  | 0.035243 | 74613106  | 74613458  | 74616642  | 74616981  |
| 259 NA12155 | [2515685 chr7 | 7 | 75790452  | 75792073  | 1622   | 2   | -0.700275 | 0.115423 | 75790248  | 75790656  | 75791881  | 75792261  |
| 260 NA12155 | [2515685 chr7 | 7 | 76173835  | 76175647  | 1813   | 2   | 0.673566  | 0.117684 | 76173564  | 76174106  | 76174852  | 76176441  |
| 261 NA12155 | [2515685 chr7 | 7 | 76298730  | 76302272  | 3543   | 11  | 0.306504  | 0.038419 | 76298561  | 76298899  | 76302096  | 76302441  |
| 262 NA12155 | [2515685 chr7 | 7 | 89455106  | 89456632  | 1527   | 3   | 2.857631  | 0.141179 | 89454839  | 89455373  | 89456225  | 89457031  |
| 263 NA12155 | [2515685 chr7 | 7 | 92971481  | 92976895  | 5415   | 4   | 0.992135  | 0.093406 | 92971060  | 92971903  | 92975569  | 92978221  |
| 264 NA12155 | [2515685 chr7 | 7 | 97032078  | 97047344  | 15267  | 17  | -0.696608 | 0.041983 | 97031625  | 97032531  | 97046973  | 97047711  |
| 265 NA12155 | [2515685 chr7 | 7 | 97201390  | 97203354  | 1965   | 7   | 0.375434  | 0.051169 | 97201229  | 97201551  | 97203295  | 97203411  |
| 266 NA12155 | [2515685 chr7 | 7 | 100201831 | 100204435 | 2605   | 5   | 0.414135  | 0.068155 | 100201558 | 100202104 | 100204196 | 100204671 |
| 267 NA12155 | [2515685 chr7 | 7 | 101583567 | 101586143 | 2577   | 9   | 0.287262  | 0.041731 | 101583458 | 101583677 | 101586005 | 101586281 |
| 268 NA12155 | [2515685 chr7 | 7 | 101706883 | 101925433 | 218551 | 312 | 0.287527  | 0.007555 | 101690888 | 101709235 | 101924670 | 101926191 |
| 269 NA12155 | [2515685 chr7 | 7 | 109034782 | 109046722 | 11941  | 9   | 2.590508  | 0.111205 | 109024063 | 109037134 | 109046491 | 109046951 |
| 270 NA12155 | [2515685 chr7 | 7 | 109776378 | 109782655 | 6278   | 5   | 0.929361  | 0.080793 | 109775821 | 109776936 | 109782301 | 109783011 |
| 271 NA12155 | [2515685 chr7 | 7 | 126114062 | 126121632 | 7571   | 11  | -0.374335 | 0.044847 | 126113876 | 126114248 | 126121278 | 126121981 |
| 272 NA12155 | [2515685 chr7 | 7 | 126123495 | 126124547 | 1053   | 2   | -0.482635 | 0.096122 | 126123234 | 126123757 | 126124499 | 126124591 |
| 273 NA12155 | [2515685 chr7 | 7 | 141498099 | 141526577 | 28479  | 38  | 0.563795  | 0.025204 | 141497066 | 141499133 | 141526109 | 141527041 |
| 274 NA12155 | [2515685 chr7 | 7 | 141962017 | 141978673 | 16657  | 22  | -0.364607 | 0.032765 | 141961693 | 141962342 | 141978355 | 141978991 |
| 275 NA12155 | [2515685 chr7 | 7 | 143257273 | 143259025 | 1753   | 2   | -0.746186 | 0.118553 | 143256987 | 143257560 | 143258671 | 143259381 |
| 276 NA12155 | [2515685 chr7 | 7 | 143346673 | 143348067 | 1395   | 5   | -0.947271 | 0.064501 | 143346643 | 143346704 | 143347806 | 143348321 |
| 277 NA12155 | [2515685 chr7 | 7 | 143472403 | 143473797 | 1395   | 5   | -0.947273 | 0.064501 | 143472142 | 143472664 | 143473766 | 143473821 |
| 278 NA12155 | [2515685 chr7 | 7 | 150003533 | 150011586 | 8054   | 8   | -0.772089 | 0.058108 | 150003334 | 150003732 | 150011258 | 150011911 |
| 279 NA12155 | [2515685 chr7 | 7 | 155886350 | 155889270 | 2921   | 3   | -0.712832 | 0.096256 | 155885986 | 155886714 | 155888729 | 155889811 |
| 280 NA12155 | [2515685 chr7 | 7 | 156976112 | 156978464 | 2353   | 2   | 0.640308  | 0.105248 | 156975812 | 156976413 | 156977896 | 156979031 |
| 281 NA12155 | [2515685 chr7 | 7 | 157023614 | 157026502 | 2889   | 5   | 0.48018   | 0.064453 | 157023242 | 157023987 | 157026181 | 157026821 |
| 282 NA12155 | [2515685 chr7 | 7 | 158617060 | 158624380 | 7321   | 6   | 0.897143  | 0.07437  | 158616763 | 158617357 | 158622028 | 158626731 |
| 283 NA12155 | [2515685 chr8 | 8 | 1328256   | 1343509   | 15254  | 45  | -0.696176 | 0.020487 | 1327688   | 1328824   | 1342795   | 1344221   |
| 284 NA12155 | [2515685 chr8 | 8 | 2238731   | 2253796   | 15066  | 10  | 0.791023  | 0.052451 | 2233839   | 2241488   | 2251039   | 2257521   |
| 285 NA12155 | [2515685 chr8 | 8 | 3632583   | 3634032   | 1450   | 2   | -0.466706 | 0.090987 | 3632337   | 3632830   | 3633441   | 3634621   |
| 286 NA12155 | [2515685 chr8 | 8 | 3885315   | 3887416   | 2102   | 2   | 0.612018  | 0.103302 | 3885089   | 3885548   | 3886275   | 3888551   |
| 287 NA12155 | [2515685 chr8 | 8 | 4110204   | 4112526   | 2323   | 2   | 3.15594   | 0.24012  | 4109692   | 4110717   | 4112031   | 4113021   |
| 288 NA12155 | [2515685 chr8 | 8 | 4751610   | 4753921   | 2312   | 2   | -0.872021 | 0.116997 | 4751096   | 4752124   | 4752842   | 4755001   |
| 289 NA12155 | [2515685 chr8 | 8 | 5531379   | 5533163   | 1785   | 2   | 0.592638  | 0.1085   | 5531149   | 5531610   | 5532492   | 5533831   |
| 290 NA12155 | [2515685 chr8 | 8 | 5817892   | 5820042   | 2151   | 2   | -1.225929 | 0.148948 | 5817072   | 5818713   | 5819661   | 5820421   |
| 291 NA12155 | [2515685 chr8 | 8 | 6815529   | 6868493   | 52965  | 95  | 0.257543  | 0.013775 | 6815199   | 6815860   | 6868272   | 6868711   |
| 292 NA12155 | [2515685 chr8 | 8 | 7066821   | 7073773   | 6953   | 11  | 0.328111  | 0.040127 | 7066421   | 7067222   | 7073366   | 7074181   |

|             |                |    |           |           |        |      |           |          |           |           |           |           |
|-------------|----------------|----|-----------|-----------|--------|------|-----------|----------|-----------|-----------|-----------|-----------|
| 293 NA12155 | [2515685 chr8  | 8  | 7092162   | 7929654   | 837493 | 1667 | 0.33841   | 0.003337 | 7092123   | 7092202   | 7929154   | 7930151   |
| 294 NA12155 | [2515685 chr8  | 8  | 7950916   | 7966244   | 15329  | 39   | 0.33841   | 0.003337 | 7950711   | 7951122   | 7965980   | 7966501   |
| 295 NA12155 | [2515685 chr8  | 8  | 11908238  | 11912516  | 4279   | 9    | 0.28905   | 0.048071 | 11908082  | 11908395  | 11912372  | 11912661  |
| 296 NA12155 | [2515685 chr8  | 8  | 12013405  | 12213645  | 200241 | 194  | 0.276656  | 0.006906 | 12013117  | 12013694  | 12213312  | 12213971  |
| 297 NA12155 | [2515685 chr8  | 8  | 12238199  | 12339505  | 101307 | 193  | 0.276656  | 0.006906 | 12235442  | 12241497  | 12339314  | 12339691  |
| 298 NA12155 | [2515685 chr8  | 8  | 12502659  | 12510593  | 7935   | 23   | 0.318947  | 0.028832 | 12502383  | 12502935  | 12510425  | 12510761  |
| 299 NA12155 | [2515685 chr8  | 8  | 12560975  | 12569238  | 8264   | 18   | 0.290892  | 0.033111 | 12560820  | 12561130  | 12568411  | 12570061  |
| 300 NA12155 | [2515685 chr8  | 8  | 14912875  | 14914460  | 1586   | 2    | 0.59388   | 0.11519  | 14912595  | 14913156  | 14913902  | 14915011  |
| 301 NA12155 | [2515685 chr8  | 8  | 16245461  | 16251509  | 6049   | 6    | -0.802081 | 0.068684 | 16245129  | 16245794  | 16250812  | 16252201  |
| 302 NA12155 | [2515685 chr8  | 8  | 20634239  | 20635394  | 1156   | 2    | -0.790972 | 0.118853 | 20633927  | 20634551  | 20634985  | 20635801  |
| 303 NA12155 | [2515685 chr8  | 8  | 21832667  | 21833967  | 1301   | 2    | 0.848604  | 0.102824 | 21832108  | 21833227  | 21833678  | 21834251  |
| 304 NA12155 | [2515685 chr8  | 8  | 22602693  | 22609330  | 6638   | 8    | 0.299095  | 0.053622 | 22602161  | 22603225  | 22608929  | 22609731  |
| 305 NA12155 | [2515685 chr8  | 8  | 47642281  | 47661491  | 19211  | 36   | 0.430301  | 0.02587  | 47637780  | 47645038  | 47658734  | 47688111  |
| 306 NA12155 | [2515685 chr8  | 8  | 49081430  | 49084499  | 3070   | 2    | 0.617364  | 0.107792 | 49079497  | 49083364  | 49084089  | 49084911  |
| 307 NA12155 | [2515685 chr8  | 8  | 58278355  | 58287850  | 9496   | 8    | 1.316861  | 0.052115 | 58277116  | 58279595  | 58287616  | 58288081  |
| 308 NA12155 | [2515685 chr8  | 8  | 58287850  | 58298767  | 10918  | 10   | 0.457042  | 0.046703 | 58287616  | 58288084  | 58296544  | 58300991  |
| 309 NA12155 | [2515685 chr8  | 8  | 85423649  | 85431920  | 8272   | 7    | 0.937763  | 0.060208 | 85423043  | 85424256  | 85431347  | 85432491  |
| 310 NA12155 | [2515685 chr8  | 8  | 86742169  | 86910255  | 168087 | 105  | 0.597889  | 0.013179 | 86741757  | 86742581  | 86910002  | 86910501  |
| 311 NA12155 | [2515685 chr8  | 8  | 115148105 | 115149916 | 1812   | 2    | -1.130491 | 0.137431 | 115147694 | 115148517 | 115149348 | 115150481 |
| 312 NA12155 | [2515685 chr8  | 8  | 120222657 | 120229952 | 7296   | 6    | 0.782123  | 0.06623  | 120218251 | 120225414 | 120229434 | 120230471 |
| 313 NA12155 | [2515685 chr8  | 8  | 145262133 | 145290325 | 28193  | 27   | 0.285111  | 0.027567 | 145260806 | 145263460 | 145290013 | 145290631 |
| 314 NA12155 | [2515685 chr9  | 9  | 310045    | 313497    | 3453   | 62   | -0.33685  | 0.016479 | 309952    | 310139    | 312740    | 3142551   |
| 315 NA12155 | [2515685 chr9  | 9  | 39019343  | 39021843  | 2501   | 5    | -0.479929 | 0.065635 | 39019070  | 39019616  | 39021230  | 39022451  |
| 316 NA12155 | [2515685 chr9  | 9  | 39201179  | 39202074  | 896    | 3    | -0.604777 | 0.078511 | 39200878  | 39201481  | 39201826  | 39202321  |
| 317 NA12155 | [2515685 chr9  | 9  | 39512437  | 39513331  | 895    | 3    | -0.604777 | 0.078511 | 39512136  | 39512739  | 39513084  | 39513571  |
| 318 NA12155 | [2515685 chr9  | 9  | 39811790  | 39822887  | 11098  | 18   | -0.289418 | 0.033297 | 39810439  | 39813141  | 39822472  | 39823301  |
| 319 NA12155 | [2515685 chr9  | 9  | 40205426  | 40281549  | 76124  | 137  | -0.257628 | 0.008233 | 40205146  | 40205707  | 40281292  | 40281801  |
| 320 NA12155 | [2515685 chr9  | 9  | 40283907  | 40357063  | 73157  | 158  | -0.257628 | 0.008233 | 40283834  | 40283980  | 40356886  | 40357241  |
| 321 NA12155 | [2515685 chr9  | 9  | 41642009  | 41646461  | 4453   | 8    | -0.299215 | 0.051116 | 41641595  | 41642423  | 41646031  | 41646891  |
| 322 NA12155 | [2515685 chr9  | 9  | 41648069  | 41653902  | 5834   | 6    | -0.468945 | 0.055838 | 41647821  | 41648318  | 41651748  | 41656051  |
| 323 NA12155 | [2515685 chr9  | 9  | 42074739  | 42078332  | 3594   | 7    | -0.377694 | 0.050713 | 42074446  | 42075033  | 42078087  | 42078571  |
| 324 NA12155 | [2515685 chr9  | 9  | 42752844  | 42762940  | 10097  | 16   | -0.422927 | 0.032114 | 42751520  | 42754168  | 42762696  | 42763181  |
| 325 NA12155 | [2515685 chr9  | 9  | 42873520  | 42883616  | 10097  | 16   | -0.422933 | 0.032114 | 42872196  | 42874844  | 42883372  | 42883861  |
| 326 NA12155 | [2515685 chr9  | 9  | 43065211  | 43066832  | 1622   | 2    | -1.052956 | 0.127609 | 43064261  | 43066162  | 43066646  | 43067011  |
| 327 NA12155 | [2515685 chr9  | 9  | 43099070  | 43172081  | 73012  | 159  | -0.2551   | 0.009158 | 43098901  | 43099240  | 43171796  | 43172361  |
| 328 NA12155 | [2515685 chr9  | 9  | 43174658  | 43213436  | 38779  | 77   | -0.2551   | 0.009158 | 43174402  | 43174915  | 43213301  | 43213571  |
| 329 NA12155 | [2515685 chr9  | 9  | 43480913  | 43484547  | 3635   | 3    | -0.486712 | 0.096261 | 43478265  | 43483277  | 43484309  | 43484781  |
| 330 NA12155 | [2515685 chr9  | 9  | 43807800  | 43810310  | 2511   | 3    | -0.932138 | 0.092807 | 43807212  | 43808388  | 43810107  | 43810511  |
| 331 NA12155 | [2515685 chr9  | 9  | 43885522  | 43886459  | 938    | 2    | -0.514007 | 0.101116 | 43885267  | 43885778  | 43886107  | 43886811  |
| 332 NA12155 | [2515685 chr9  | 9  | 45073178  | 45084112  | 10935  | 2    | 0.639166  | 0.099042 | 45066451  | 45075542  | 45081748  | 45093531  |
| 333 NA12155 | [2515685 chr9  | 9  | 45598651  | 45609584  | 10934  | 2    | 0.639166  | 0.099041 | 45593357  | 45601015  | 45607220  | 45616311  |
| 334 NA12155 | [2515685 chr9  | 9  | 69239712  | 69257511  | 17800  | 12   | 0.271876  | 0.040914 | 69238826  | 69240599  | 69257378  | 69257641  |
| 335 NA12155 | [2515685 chr9  | 9  | 69326160  | 69352501  | 26342  | 27   | -0.90893  | 0.031702 | 69321093  | 69328524  | 69350137  | 69356941  |
| 336 NA12155 | [2515685 chr9  | 9  | 101795950 | 101804576 | 8627   | 7    | -0.944931 | 0.067456 | 101795517 | 101796383 | 101803113 | 101806031 |
| 337 NA12155 | [2515685 chr9  | 9  | 112901134 | 112932269 | 31136  | 43   | 0.409375  | 0.019843 | 112900711 | 112901557 | 112931621 | 112932911 |
| 338 NA12155 | [2515685 chr9  | 9  | 130843003 | 130847484 | 4482   | 5    | 0.380567  | 0.066857 | 130842119 | 130843888 | 130846441 | 130848521 |
| 339 NA12155 | [2515685 chr9  | 9  | 135438417 | 135444067 | 5651   | 2    | 4.240397  | 0.197501 | 135383632 | 135440781 | 135443016 | 135445111 |
| 340 NA12155 | [2515685 chr9  | 9  | 138397327 | 138399638 | 2312   | 12   | -0.25967  | 0.046281 | 138397201 | 138397454 | 138399572 | 138399701 |
| 341 NA12155 | [2515685 chr10 | 10 | 170571    | 172369    | 1799   | 2    | 0.6378    | 0.101434 | 170341    | 170801    | 171237    | 1735011   |
| 342 NA12155 | [2515685 chr10 | 10 | 3099589   | 3101985   | 2397   | 2    | 0.684141  | 0.117567 | 3098962   | 3100217   | 3101441   | 3102521   |
| 343 NA12155 | [2515685 chr10 | 10 | 6693908   | 6704321   | 10414  | 9    | 0.774309  | 0.054512 | 6692231   | 6695585   | 6704008   | 6704631   |
| 344 NA12155 | [2515685 chr10 | 10 | 19788068  | 19791314  | 3247   | 4    | -0.400677 | 0.068365 | 19787726  | 19788411  | 19790970  | 19791651  |
| 345 NA12155 | [2515685 chr10 | 10 | 20036833  | 20038315  | 1483   | 2    | -0.724388 | 0.114791 | 20036464  | 20037202  | 20038007  | 20038621  |
| 346 NA12155 | [2515685 chr10 | 10 | 20888198  | 20900115  | 11918  | 9    | -0.643811 | 0.056052 | 20883329  | 20890946  | 20897367  | 20902911  |
| 347 NA12155 | [2515685 chr10 | 10 | 37488261  | 37529195  | 40935  | 62   | -0.450241 | 0.016911 | 37487986  | 37488536  | 37528890  | 37529501  |

|             |                |    |           |           |        |     |           |          |           |           |           |          |
|-------------|----------------|----|-----------|-----------|--------|-----|-----------|----------|-----------|-----------|-----------|----------|
| 348 NA12155 | [2515685 chr10 | 10 | 42558465  | 42565662  | 7198   | 11  | -0.351082 | 0.045611 | 42558283  | 42558647  | 42565423  | 42565907 |
| 349 NA12155 | [2515685 chr10 | 10 | 46101676  | 46132737  | 31062  | 47  | -0.312271 | 0.019567 | 46101661  | 46101691  | 46132697  | 46132771 |
| 350 NA12155 | [2515685 chr10 | 10 | 46168755  | 46170845  | 2091   | 9   | -0.322359 | 0.048274 | 46168488  | 46169022  | 46170704  | 46170987 |
| 351 NA12155 | [2515685 chr10 | 10 | 46233249  | 46239743  | 6495   | 18  | -0.299502 | 0.031987 | 46233114  | 46233385  | 46239493  | 46239999 |
| 352 NA12155 | [2515685 chr10 | 10 | 46256571  | 46259735  | 3165   | 9   | -0.499956 | 0.047468 | 46256467  | 46256676  | 46259649  | 46259827 |
| 353 NA12155 | [2515685 chr10 | 10 | 46402369  | 46408539  | 6171   | 7   | -0.419423 | 0.055307 | 46402159  | 46402580  | 46408206  | 46408887 |
| 354 NA12155 | [2515685 chr10 | 10 | 46737007  | 47105232  | 368226 | 304 | -0.250016 | 0.007034 | 46736746  | 46737269  | 47104968  | 47105497 |
| 355 NA12155 | [2515685 chr10 | 10 | 47112204  | 47173707  | 61504  | 93  | -0.250016 | 0.007034 | 47112009  | 47112400  | 47173507  | 47173907 |
| 356 NA12155 | [2515685 chr10 | 10 | 47728852  | 47731937  | 3086   | 10  | -0.521039 | 0.046852 | 47728766  | 47728939  | 47731752  | 47732127 |
| 357 NA12155 | [2515685 chr10 | 10 | 48488577  | 48529199  | 40623  | 68  | -0.26776  | 0.01644  | 48488562  | 48488592  | 48529184  | 48529211 |
| 358 NA12155 | [2515685 chr10 | 10 | 48622994  | 48629471  | 6478   | 19  | -0.286976 | 0.031908 | 48622859  | 48623130  | 48629203  | 48629741 |
| 359 NA12155 | [2515685 chr10 | 10 | 48645747  | 48665052  | 19266  | 45  | -0.298157 | 0.019672 | 48645700  | 48645874  | 48664430  | 48665671 |
| 360 NA12155 | [2515685 chr10 | 10 | 48887283  | 48889465  | 2223   | 6   | -0.358845 | 0.053602 | 48886453  | 48888033  | 48889265  | 48889661 |
| 361 NA12155 | [2515685 chr10 | 10 | 56117212  | 56139275  | 22064  | 20  | -1.015946 | 0.035454 | 56115764  | 56118661  | 56138931  | 56139611 |
| 362 NA12155 | [2515685 chr10 | 10 | 66977355  | 66985193  | 7839   | 8   | -0.936494 | 0.064115 | 66976803  | 66977908  | 66984894  | 66985497 |
| 363 NA12155 | [2515685 chr10 | 10 | 81144645  | 81173619  | 28975  | 28  | -0.278284 | 0.024819 | 81144276  | 81145014  | 81171386  | 81175857 |
| 364 NA12155 | [2515685 chr10 | 10 | 81464835  | 81493795  | 28961  | 26  | -0.269879 | 0.025857 | 81464464  | 81465206  | 81491562  | 81496027 |
| 365 NA12155 | [2515685 chr10 | 10 | 88987140  | 89016296  | 29157  | 39  | -0.266148 | 0.022572 | 88987076  | 88987204  | 89014572  | 89018027 |
| 366 NA12155 | [2515685 chr10 | 10 | 114102241 | 114106477 | 4237   | 5   | -4.723303 | 0.186704 | 114101694 | 114102788 | 114105867 | 11410708 |
| 367 NA12155 | [2515685 chr10 | 10 | 124336365 | 124341749 | 5385   | 6   | 0.667433  | 0.069289 | 124335581 | 124337149 | 124341238 | 12434226 |
| 368 NA12155 | [2515685 chr10 | 10 | 134168766 | 134170259 | 1494   | 17  | -0.303013 | 0.038896 | 134168524 | 134169008 | 134170097 | 13417042 |
| 369 NA12155 | [2515685 chr10 | 10 | 134924761 | 134936051 | 11291  | 30  | 0.385146  | 0.02887  | 134924706 | 134924816 | 134935860 | 13493624 |
| 370 NA12155 | [2515685 chr10 | 10 | 135179346 | 135183528 | 4183   | 23  | 0.295412  | 0.026104 | 135178919 | 135179774 | 135183320 | 13518373 |
| 371 NA12155 | [2515685 chr10 | 10 | 135362077 | 135367159 | 5083   | 8   | 0.273597  | 0.052667 | 135361749 | 135362405 | 135366656 | 13536766 |
| 372 NA12155 | [2515685 chr11 | 11 | 2839485   | 2842410   | 2926   | 4   | 0.586001  | 0.076419 | 2839011   | 2839959   | 2841856   | 2842961  |
| 373 NA12155 | [2515685 chr11 | 11 | 3628748   | 3632795   | 4048   | 6   | -2.486992 | 0.089445 | 3625722   | 3631775   | 3632594   | 3632991  |
| 374 NA12155 | [2515685 chr11 | 11 | 4322633   | 4323296   | 664    | 2   | 0.636315  | 0.103293 | 4322266   | 4323001   | 4323117   | 4323471  |
| 375 NA12155 | [2515685 chr11 | 11 | 5717038   | 5722030   | 4993   | 3   | 3.280413  | 0.162674 | 5716660   | 5717416   | 5718945   | 5725487  |
| 376 NA12155 | [2515685 chr11 | 11 | 5741781   | 5765993   | 24213  | 32  | 2.327615  | 0.05557  | 5741059   | 5742504   | 5765632   | 5766354  |
| 377 NA12155 | [2515685 chr11 | 11 | 11831868  | 11833089  | 1222   | 2   | 0.913741  | 0.125652 | 11831412  | 11832324  | 11832853  | 11833321 |
| 378 NA12155 | [2515685 chr11 | 11 | 18903448  | 18923024  | 19577  | 30  | 0.498487  | 0.028028 | 18897800  | 18906533  | 18919939  | 18928457 |
| 379 NA12155 | [2515685 chr11 | 11 | 48284073  | 48284771  | 699    | 2   | 1.084552  | 0.111895 | 48283862  | 48284285  | 48284572  | 48284971 |
| 380 NA12155 | [2515685 chr11 | 11 | 48997072  | 49001951  | 4880   | 10  | 0.280995  | 0.049101 | 48996760  | 48997384  | 49001459  | 49002449 |
| 381 NA12155 | [2515685 chr11 | 11 | 49665830  | 49715833  | 50004  | 36  | 0.448863  | 0.025849 | 49665251  | 49666410  | 49712748  | 49721989 |
| 382 NA12155 | [2515685 chr11 | 11 | 50233802  | 50235333  | 1532   | 3   | -0.405025 | 0.075382 | 50233483  | 50234121  | 50234922  | 50235741 |
| 383 NA12155 | [2515685 chr11 | 11 | 54970040  | 54979405  | 9366   | 8   | -0.27652  | 0.051418 | 54969740  | 54970341  | 54979178  | 54979637 |
| 384 NA12155 | [2515685 chr11 | 11 | 60721034  | 60777477  | 56444  | 74  | 0.709445  | 0.01575  | 60720112  | 60721956  | 60776810  | 60778141 |
| 385 NA12155 | [2515685 chr11 | 11 | 73815147  | 73817979  | 2833   | 2   | -0.722029 | 0.112749 | 73812981  | 73817313  | 73817746  | 73818217 |
| 386 NA12155 | [2515685 chr11 | 11 | 85981700  | 85984113  | 2414   | 3   | -0.98247  | 0.098981 | 85981147  | 85982254  | 85983791  | 85984431 |
| 387 NA12155 | [2515685 chr11 | 11 | 88263339  | 88303948  | 40610  | 40  | 0.259798  | 0.02465  | 88258479  | 88266424  | 88303762  | 88304137 |
| 388 NA12155 | [2515685 chr11 | 11 | 89184898  | 89189792  | 4895   | 5   | 0.688815  | 0.084452 | 89184243  | 89185554  | 89189177  | 89190407 |
| 389 NA12155 | [2515685 chr11 | 11 | 89323920  | 89327673  | 3754   | 8   | -0.300742 | 0.053575 | 89323666  | 89324175  | 89327396  | 89327951 |
| 390 NA12155 | [2515685 chr11 | 11 | 96613298  | 96614605  | 1308   | 2   | -0.79774  | 0.115188 | 96613051  | 96613545  | 96614321  | 96614891 |
| 391 NA12155 | [2515685 chr11 | 11 | 106744846 | 106746569 | 1724   | 5   | -0.965172 | 0.082461 | 106744561 | 106745131 | 106746367 | 10674677 |
| 392 NA12155 | [2515685 chr11 | 11 | 106747019 | 106751056 | 4038   | 3   | -0.704606 | 0.096266 | 106746772 | 106747267 | 106747971 | 10675483 |
| 393 NA12155 | [2515685 chr11 | 11 | 129821773 | 129829067 | 7295   | 7   | 0.312691  | 0.058293 | 129821444 | 129822103 | 129828182 | 12982995 |
| 394 NA12155 | [2515685 chr11 | 11 | 134107699 | 134112290 | 4592   | 5   | 0.861817  | 0.0766   | 134106591 | 134108808 | 134111845 | 13411273 |
| 395 NA12155 | [2515685 chr12 | 12 | 2112534   | 2127840   | 15307  | 16  | 0.770849  | 0.03945  | 2109107   | 2115961   | 2127279   | 2128407  |
| 396 NA12155 | [2515685 chr12 | 12 | 6113530   | 6117052   | 3523   | 3   | 0.947517  | 0.102925 | 6111640   | 6115421   | 6116289   | 6117811  |
| 397 NA12155 | [2515685 chr12 | 12 | 8238250   | 8271843   | 33594  | 47  | 0.29972   | 0.021003 | 8238076   | 8238425   | 8271580   | 8272107  |
| 398 NA12155 | [2515685 chr12 | 12 | 8434390   | 8443687   | 9298   | 19  | 0.307553  | 0.031207 | 8433950   | 8434831   | 8442906   | 8444461  |
| 399 NA12155 | [2515685 chr12 | 12 | 9267394   | 9271654   | 4261   | 2   | -0.634084 | 0.119717 | 9266955   | 9267834   | 9270768   | 9272541  |
| 400 NA12155 | [2515685 chr12 | 12 | 11109398  | 11142012  | 32615  | 40  | -0.396982 | 0.023798 | 11109206  | 11109590  | 11141608  | 11142417 |
| 401 NA12155 | [2515685 chr12 | 12 | 11229475  | 11230808  | 1334   | 2   | 0.621293  | 0.106676 | 11228967  | 11229984  | 11230473  | 11231114 |
| 402 NA12155 | [2515685 chr12 | 12 | 11398899  | 11436142  | 37244  | 33  | -0.442053 | 0.025944 | 11398591  | 11399207  | 11435669  | 11436611 |

|             |                |    |           |           |        |     |           |          |           |           |           |           |
|-------------|----------------|----|-----------|-----------|--------|-----|-----------|----------|-----------|-----------|-----------|-----------|
| 403 NA12155 | [2515685 chr12 | 12 | 46994634  | 46995975  | 1342   | 2   | -0.879395 | 0.13657  | 46994358  | 46994911  | 46995667  | 4699628   |
| 404 NA12155 | [2515685 chr12 | 12 | 62184306  | 62189352  | 5047   | 2   | -0.877504 | 0.129104 | 62183601  | 62185011  | 62186044  | 62192660  |
| 405 NA12155 | [2515685 chr12 | 12 | 129395501 | 129397499 | 1999   | 14  | 0.348107  | 0.034211 | 129395008 | 129395994 | 129397172 | 12939782  |
| 406 NA12155 | [2515685 chr12 | 12 | 130777013 | 130778340 | 1328   | 2   | 0.57631   | 0.100029 | 130776667 | 130777359 | 130778020 | 13077866  |
| 407 NA12155 | [2515685 chr12 | 12 | 130829328 | 130830361 | 1034   | 2   | 0.566221  | 0.10064  | 130828952 | 130829705 | 130830203 | 13083051  |
| 408 NA12155 | [2515685 chr13 | 13 | 18217757  | 18277248  | 59492  | 20  | 0.32199   | 0.032978 | 18217719  | 18217795  | 182175111 | 1827938!  |
| 409 NA12155 | [2515685 chr13 | 13 | 25947233  | 25950398  | 3166   | 3   | 3.506554  | 0.167312 | 25946194  | 25948272  | 25949415  | 2595138   |
| 410 NA12155 | [2515685 chr13 | 13 | 33029566  | 33042392  | 12827  | 8   | 0.798371  | 0.064033 | 33000262  | 33034253  | 33041860  | 3304292!  |
| 411 NA12155 | [2515685 chr13 | 13 | 56611711  | 56645734  | 34024  | 47  | 0.420476  | 0.018261 | 56610946  | 56612477  | 56645321  | 5664614   |
| 412 NA12155 | [2515685 chr13 | 13 | 68143211  | 68162454  | 19244  | 22  | -0.877496 | 0.036207 | 68142130  | 68144292  | 68161725  | 6816318!  |
| 413 NA12155 | [2515685 chr13 | 13 | 69633905  | 69673289  | 39385  | 41  | 0.794615  | 0.026213 | 69633412  | 69634399  | 69672985  | 6967359!  |
| 414 NA12155 | [2515685 chr13 | 13 | 110502383 | 110503129 | 747    | 3   | -1.069103 | 0.102325 | 110502225 | 110502541 | 110502890 | 11050336  |
| 415 NA12155 | [2515685 chr14 | 14 | 18439491  | 18567580  | 128090 | 136 | -0.458858 | 0.003626 | 18437497  | 18441485  | 18566846  | 1856831   |
| 416 NA12155 | [2515685 chr14 | 14 | 18570586  | 18707498  | 136913 | 244 | -0.458858 | 0.003626 | 18570362  | 18570811  | 18706650  | 1870834   |
| 417 NA12155 | [2515685 chr14 | 14 | 18713012  | 18754438  | 41427  | 81  | -0.458858 | 0.003626 | 18712887  | 18713138  | 18754380  | 1875449   |
| 418 NA12155 | [2515685 chr14 | 14 | 18758859  | 18818454  | 59596  | 111 | -0.458858 | 0.003626 | 18758795  | 18758923  | 18818043  | 1881886!  |
| 419 NA12155 | [2515685 chr14 | 14 | 18850498  | 19002373  | 151876 | 265 | -0.458858 | 0.003626 | 18850172  | 18850824  | 19002247  | 1900249!  |
| 420 NA12155 | [2515685 chr14 | 14 | 19005677  | 19142870  | 137194 | 249 | -0.458858 | 0.003626 | 19005568  | 19005787  | 19142646  | 1914309!  |
| 421 NA12155 | [2515685 chr14 | 14 | 19145876  | 19494842  | 348967 | 403 | -0.458858 | 0.003626 | 19145143  | 19146610  | 19494444  | 1949524   |
| 422 NA12155 | [2515685 chr14 | 14 | 19619346  | 19625484  | 6139   | 2   | 3.720359  | 0.257271 | 19612261  | 19624114  | 19625018  | 1962595!  |
| 423 NA12155 | [2515685 chr14 | 14 | 23574706  | 23575428  | 723    | 2   | 0.546485  | 0.092164 | 23574469  | 23574944  | 23575303  | 2357555   |
| 424 NA12155 | [2515685 chr14 | 14 | 40895652  | 40897384  | 1733   | 2   | -0.82299  | 0.123264 | 40895015  | 40896289  | 40897151  | 4089761!  |
| 425 NA12155 | [2515685 chr14 | 14 | 42059344  | 42062997  | 3654   | 2   | 0.866631  | 0.122729 | 42056485  | 42062203  | 42062601  | 4206339!  |
| 426 NA12155 | [2515685 chr14 | 14 | 53780053  | 53782988  | 2936   | 5   | -0.949835 | 0.078636 | 53779833  | 53780274  | 53782739  | 5378323!  |
| 427 NA12155 | [2515685 chr14 | 14 | 73063171  | 73122855  | 59685  | 54  | 0.495186  | 0.020877 | 73061866  | 73064476  | 73122227  | 7312348!  |
| 428 NA12155 | [2515685 chr14 | 14 | 85352729  | 85353678  | 950    | 2   | 0.605309  | 0.112228 | 85352528  | 85352931  | 85353378  | 8535397!  |
| 429 NA12155 | [2515685 chr14 | 14 | 85355318  | 85383570  | 28253  | 27  | -0.929158 | 0.032298 | 85355002  | 85355635  | 85382242  | 8538489!  |
| 430 NA12155 | [2515685 chr14 | 14 | 103320373 | 103321606 | 1234   | 2   | 0.465456  | 0.091024 | 103320013 | 103320734 | 103321274 | 10332193  |
| 431 NA12155 | [2515685 chr14 | 14 | 103430269 | 103432153 | 1885   | 3   | 0.498035  | 0.073902 | 103429996 | 103430542 | 103431610 | 10343269  |
| 432 NA12155 | [2515685 chr14 | 14 | 104766812 | 104778505 | 11694  | 145 | -0.606944 | 0.011803 | 104766457 | 104767167 | 104778286 | 10477872! |
| 433 NA12155 | [2515685 chr15 | 15 | 18417648  | 18430991  | 13344  | 13  | 0.37916   | 0.041394 | 18413063  | 18419952  | 18430684  | 1843129!  |
| 434 NA12155 | [2515685 chr15 | 15 | 18439723  | 18450345  | 10623  | 5   | -0.414063 | 0.074375 | 18439532  | 18439914  | 18450100  | 1845059!  |
| 435 NA12155 | [2515685 chr15 | 15 | 18457915  | 18468372  | 10458  | 7   | -0.351564 | 0.053643 | 18457619  | 18458212  | 18467866  | 1846887!  |
| 436 NA12155 | [2515685 chr15 | 15 | 18555968  | 18557255  | 1288   | 2   | -0.705916 | 0.110046 | 18555543  | 18556394  | 18556441  | 1855806!  |
| 437 NA12155 | [2515685 chr15 | 15 | 18650520  | 18690378  | 39859  | 41  | -0.308556 | 0.023412 | 18650193  | 18650848  | 18690036  | 1869072!  |
| 438 NA12155 | [2515685 chr15 | 15 | 18824476  | 18836662  | 12187  | 13  | -0.384277 | 0.04269  | 18824302  | 18824650  | 18836367  | 1883695!  |
| 439 NA12155 | [2515685 chr15 | 15 | 18840785  | 18849369  | 8585   | 13  | -0.867534 | 0.043872 | 18839417  | 18842153  | 18848726  | 1885001!  |
| 440 NA12155 | [2515685 chr15 | 15 | 18849369  | 18888949  | 39581  | 39  | -0.327136 | 0.024347 | 18848726  | 18850013  | 18886645  | 1889275!  |
| 441 NA12155 | [2515685 chr15 | 15 | 19050774  | 19056269  | 5496   | 3   | -0.473019 | 0.074031 | 19048080  | 19053078  | 19056068  | 1905647!  |
| 442 NA12155 | [2515685 chr15 | 15 | 19090947  | 19092178  | 1232   | 3   | -0.518661 | 0.086226 | 19090386  | 19091509  | 19091867  | 1909249!  |
| 443 NA12155 | [2515685 chr15 | 15 | 19391202  | 19396368  | 5167   | 9   | -0.353171 | 0.050285 | 19390673  | 19391731  | 19396071  | 1939666!  |
| 444 NA12155 | [2515685 chr15 | 15 | 19468608  | 19480237  | 11630  | 8   | -0.353375 | 0.047912 | 19468389  | 19468827  | 19479214  | 1948126   |
| 445 NA12155 | [2515685 chr15 | 15 | 19521510  | 19528073  | 6564   | 14  | -0.272227 | 0.036988 | 19521219  | 19521801  | 19527910  | 1952823!  |
| 446 NA12155 | [2515685 chr15 | 15 | 19661791  | 19665545  | 3755   | 3   | -0.450572 | 0.075612 | 19661464  | 19662119  | 19663241  | 1976350!  |
| 447 NA12155 | [2515685 chr15 | 15 | 19797016  | 19801971  | 4956   | 11  | -0.483189 | 0.043468 | 19796797  | 19797235  | 19801776  | 1980216!  |
| 448 NA12155 | [2515685 chr15 | 15 | 20367533  | 20385080  | 17548  | 19  | 0.267001  | 0.032275 | 20367145  | 20367922  | 20384584  | 2038557!  |
| 449 NA12155 | [2515685 chr15 | 15 | 21009586  | 21015083  | 5498   | 3   | -0.473019 | 0.074031 | 21006900  | 21011890  | 21014882  | 2101528!  |
| 450 NA12155 | [2515685 chr15 | 15 | 21049779  | 21051502  | 1724   | 4   | -0.441896 | 0.071012 | 21049217  | 21050342  | 21051321  | 2105168   |
| 451 NA12155 | [2515685 chr15 | 15 | 21606753  | 21614602  | 7850   | 7   | 0.911879  | 0.069834 | 21606459  | 21607047  | 21612298  | 2163669!  |
| 452 NA12155 | [2515685 chr15 | 15 | 21898127  | 21930852  | 32726  | 32  | -0.289212 | 0.025663 | 21898017  | 21898237  | 21929383  | 2193232!  |
| 453 NA12155 | [2515685 chr15 | 15 | 22062101  | 22092026  | 29926  | 37  | -0.268921 | 0.024542 | 22062047  | 22062155  | 22091550  | 2209250!  |
| 454 NA12155 | [2515685 chr15 | 15 | 22203281  | 22311132  | 107852 | 119 | -0.348485 | 0.013699 | 22202730  | 22203833  | 22308828  | 2231607!  |
| 455 NA12155 | [2515685 chr15 | 15 | 24986053  | 24992250  | 6198   | 7   | 0.956676  | 0.067857 | 24985426  | 24986680  | 24991680  | 2499282!  |
| 456 NA12155 | [2515685 chr15 | 15 | 27133105  | 27134889  | 1785   | 5   | 0.43351   | 0.066185 | 27132904  | 27133306  | 27134660  | 2713511!  |
| 457 NA12155 | [2515685 chr15 | 15 | 28231805  | 28479588  | 247784 | 373 | 0.256711  | 0.007552 | 28231555  | 28232056  | 28479402  | 2847977!  |

|             |                |    |           |           |        |     |           |          |           |           |           |           |
|-------------|----------------|----|-----------|-----------|--------|-----|-----------|----------|-----------|-----------|-----------|-----------|
| 458 NA12155 | [2515685 chr15 | 15 | 28572480  | 28584728  | 12249  | 8   | 0.354888  | 0.050846 | 28571980  | 28572981  | 28582650  | 28586807  |
| 459 NA12155 | [2515685 chr15 | 15 | 28606541  | 28615711  | 9171   | 15  | 0.278728  | 0.034623 | 28606305  | 28606778  | 28615510  | 28615917  |
| 460 NA12155 | [2515685 chr15 | 15 | 28645228  | 28654504  | 9277   | 16  | 0.321994  | 0.034013 | 28645123  | 28645333  | 28654500  | 28654501  |
| 461 NA12155 | [2515685 chr15 | 15 | 30233486  | 30468087  | 234602 | 346 | 0.258078  | 0.007934 | 30233172  | 30233800  | 30467363  | 30468817  |
| 462 NA12155 | [2515685 chr15 | 15 | 30499154  | 30520934  | 21781  | 43  | 0.254623  | 0.020755 | 30498803  | 30499505  | 30520735  | 30521137  |
| 463 NA12155 | [2515685 chr15 | 15 | 30550779  | 30560029  | 9251   | 16  | 0.274472  | 0.033531 | 30550701  | 30550857  | 30559711  | 30560347  |
| 464 NA12155 | [2515685 chr15 | 15 | 30581974  | 30594019  | 12046  | 8   | 0.35237   | 0.050234 | 30579896  | 30584052  | 30593714  | 30594321  |
| 465 NA12155 | [2515685 chr15 | 15 | 32468792  | 32656877  | 188086 | 191 | 0.407183  | 0.010447 | 32468521  | 32469063  | 32656150  | 32657601  |
| 466 NA12155 | [2515685 chr15 | 15 | 41924444  | 41928405  | 3962   | 3   | 0.612505  | 0.092165 | 41923444  | 41925445  | 41927893  | 41928911  |
| 467 NA12155 | [2515685 chr15 | 15 | 54577186  | 54582093  | 4908   | 8   | -0.900575 | 0.057884 | 54577013  | 54577360  | 54579789  | 54618847  |
| 468 NA12155 | [2515685 chr15 | 15 | 74671388  | 74682822  | 11435  | 9   | 0.872963  | 0.057814 | 74671122  | 74671654  | 74680518  | 74689511  |
| 469 NA12155 | [2515685 chr15 | 15 | 80588100  | 80588985  | 886    | 2   | -0.582805 | 0.088525 | 80587699  | 80588502  | 80588602  | 80589361  |
| 470 NA12155 | [2515685 chr15 | 15 | 80982676  | 80983561  | 886    | 2   | -0.582805 | 0.088525 | 80982275  | 80983078  | 80983178  | 80983947  |
| 471 NA12155 | [2515685 chr15 | 15 | 82333041  | 82335194  | 2154   | 2   | -0.690641 | 0.107071 | 82332284  | 82333799  | 82334729  | 82335661  |
| 472 NA12155 | [2515685 chr15 | 15 | 83581911  | 83582575  | 665    | 2   | -0.582792 | 0.088524 | 83581731  | 83582092  | 83582192  | 83582951  |
| 473 NA12155 | [2515685 chr15 | 15 | 98234084  | 98240716  | 6633   | 8   | 0.817017  | 0.064835 | 98233842  | 98234327  | 98239350  | 98242087  |
| 474 NA12155 | [2515685 chr15 | 15 | 99664319  | 99666783  | 2465   | 3   | 0.49856   | 0.088606 | 99664041  | 99664598  | 99666335  | 99667237  |
| 475 NA12155 | [2515685 chr15 | 15 | 100109640 | 100122682 | 13043  | 98  | 0.600842  | 0.012839 | 100108905 | 100110376 | 100122315 | 100123051 |
| 476 NA12155 | [2515685 chr15 | 15 | 100266886 | 100337837 | 70952  | 63  | 0.263438  | 0.017987 | 100264210 | 100269190 | 100336759 | 100338911 |
| 477 NA12155 | [2515685 chr16 | 16 | 946002    | 948831    | 2830   | 2   | -0.889894 | 0.112721 | 945660    | 946345    | 947314    | 950345    |
| 478 NA12155 | [2515685 chr16 | 16 | 948831    | 952527    | 3697   | 39  | 0.420078  | 0.020047 | 947314    | 950349    | 952191    | 952864    |
| 479 NA12155 | [2515685 chr16 | 16 | 2638196   | 2640225   | 2030   | 3   | -0.942168 | 0.11403  | 2637783   | 2638609   | 2639826   | 2640624   |
| 480 NA12155 | [2515685 chr16 | 16 | 14696077  | 14703775  | 7699   | 5   | -0.310164 | 0.055988 | 14695838  | 14696316  | 14703313  | 14704237  |
| 481 NA12155 | [2515685 chr16 | 16 | 14735195  | 14742897  | 7703   | 5   | -0.310161 | 0.055988 | 14734956  | 14735434  | 14742435  | 14743351  |
| 482 NA12155 | [2515685 chr16 | 16 | 16633469  | 16639120  | 5652   | 4   | 0.490194  | 0.076062 | 16632502  | 16634437  | 16638386  | 16639857  |
| 483 NA12155 | [2515685 chr16 | 16 | 19853133  | 19869228  | 16096  | 14  | -0.82147  | 0.043302 | 19852680  | 19853587  | 19867345  | 19879411  |
| 484 NA12155 | [2515685 chr16 | 16 | 21419656  | 21502620  | 82965  | 80  | 0.269035  | 0.015851 | 21419375  | 21419938  | 21501101  | 21504141  |
| 485 NA12155 | [2515685 chr16 | 16 | 22458848  | 22618743  | 159896 | 146 | 0.296941  | 0.011882 | 22457280  | 22460417  | 22617181  | 22620301  |
| 486 NA12155 | [2515685 chr16 | 16 | 28324917  | 28332627  | 7711   | 5   | -0.533272 | 0.068922 | 28324665  | 28325169  | 28332615  | 28332631  |
| 487 NA12155 | [2515685 chr16 | 16 | 28620329  | 28628077  | 7749   | 5   | -0.533277 | 0.068922 | 28620317  | 28620341  | 28627777  | 28628337  |
| 488 NA12155 | [2515685 chr16 | 16 | 31870268  | 31894079  | 23812  | 46  | -0.317788 | 0.021039 | 31870008  | 31870528  | 31893656  | 31894507  |
| 489 NA12155 | [2515685 chr16 | 16 | 32154214  | 32197170  | 42957  | 98  | -0.485109 | 0.013918 | 32154161  | 32154267  | 32196926  | 32197417  |
| 490 NA12155 | [2515685 chr16 | 16 | 32213712  | 32219640  | 5929   | 12  | -0.518122 | 0.038521 | 32213463  | 32213961  | 32219531  | 32219747  |
| 491 NA12155 | [2515685 chr16 | 16 | 32479454  | 32514716  | 35263  | 9   | -0.324758 | 0.01637  | 32400448  | 32481337  | 32514260  | 32515177  |
| 492 NA12155 | [2515685 chr16 | 16 | 32517597  | 32560619  | 43023  | 72  | -0.324758 | 0.01637  | 32517265  | 32517929  | 32559391  | 32561847  |
| 493 NA12155 | [2515685 chr16 | 16 | 32570265  | 32612861  | 42597  | 103 | -0.464484 | 0.013575 | 32570138  | 32570393  | 32612808  | 32612917  |
| 494 NA12155 | [2515685 chr16 | 16 | 32614929  | 32616183  | 1255   | 2   | -0.801392 | 0.093478 | 32614897  | 32614961  | 32615350  | 32617017  |
| 495 NA12155 | [2515685 chr16 | 16 | 32767311  | 32767950  | 640    | 2   | -0.686452 | 0.100022 | 32767166  | 32767456  | 32767576  | 32768327  |
| 496 NA12155 | [2515685 chr16 | 16 | 32807380  | 32833612  | 26233  | 46  | -0.345164 | 0.021141 | 32807111  | 32807650  | 32833543  | 32833687  |
| 497 NA12155 | [2515685 chr16 | 16 | 33095178  | 33121570  | 26393  | 78  | -0.426971 | 0.009083 | 33095125  | 33095231  | 33121485  | 33121651  |
| 498 NA12155 | [2515685 chr16 | 16 | 33124597  | 33178109  | 53513  | 115 | -0.426971 | 0.009083 | 33124532  | 33124662  | 33178024  | 33178197  |
| 499 NA12155 | [2515685 chr16 | 16 | 33181136  | 33194268  | 13133  | 12  | -0.426971 | 0.009083 | 33181071  | 33181201  | 33194099  | 33194437  |
| 500 NA12155 | [2515685 chr16 | 16 | 33207215  | 33209367  | 2153   | 5   | -0.50397  | 0.065133 | 33206951  | 33207480  | 33209124  | 33209611  |
| 501 NA12155 | [2515685 chr16 | 16 | 33211121  | 33217055  | 5935   | 10  | -0.550451 | 0.041971 | 33210872  | 33211370  | 33216946  | 33217161  |
| 502 NA12155 | [2515685 chr16 | 16 | 33336488  | 33397333  | 60846  | 74  | -0.29496  | 0.017018 | 33336324  | 33336653  | 33397172  | 33397491  |
| 503 NA12155 | [2515685 chr16 | 16 | 33502420  | 33570898  | 68479  | 90  | -0.325886 | 0.015594 | 33502141  | 33502700  | 33570429  | 33571361  |
| 504 NA12155 | [2515685 chr16 | 16 | 33647651  | 33684025  | 36375  | 64  | -0.30039  | 0.018166 | 33647418  | 33647884  | 33683516  | 33684531  |
| 505 NA12155 | [2515685 chr16 | 16 | 33720144  | 33723491  | 3348   | 5   | -0.492633 | 0.064338 | 33716428  | 33722027  | 33723206  | 33723777  |
| 506 NA12155 | [2515685 chr16 | 16 | 33852540  | 33873809  | 21270  | 13  | 0.360336  | 0.042547 | 33852389  | 33852692  | 33873512  | 33874101  |
| 507 NA12155 | [2515685 chr16 | 16 | 34326899  | 34342005  | 15107  | 25  | -0.479971 | 0.008682 | 34326619  | 34327179  | 34341760  | 34342251  |
| 508 NA12155 | [2515685 chr16 | 16 | 34343871  | 34603408  | 259538 | 284 | -0.479971 | 0.008682 | 34343515  | 34344228  | 34602803  | 34604017  |
| 509 NA12155 | [2515685 chr16 | 16 | 34604535  | 34609076  | 4542   | 2   | -0.663964 | 0.115364 | 34604013  | 34605058  | 34607193  | 34617321  |
| 510 NA12155 | [2515685 chr16 | 16 | 54353711  | 54360305  | 6595   | 8   | -0.389957 | 0.055782 | 54353419  | 54354004  | 54359570  | 54361041  |
| 511 NA12155 | [2515685 chr16 | 16 | 54365075  | 54371760  | 6686   | 8   | -0.638688 | 0.051011 | 54364721  | 54365430  | 54370782  | 54372731  |
| 512 NA12155 | [2515685 chr16 | 16 | 54376230  | 54380125  | 3896   | 3   | -0.509113 | 0.095722 | 54375462  | 54376998  | 54379862  | 54380381  |

|             |                |    |          |          |        |     |           |          |          |          |          |          |
|-------------|----------------|----|----------|----------|--------|-----|-----------|----------|----------|----------|----------|----------|
| 513 NA12155 | [2515685 chr16 | 16 | 54399675 | 54403491 | 3817   | 5   | 0.608361  | 0.071026 | 54399445 | 54399906 | 54402534 | 5440444! |
| 514 NA12155 | [2515685 chr16 | 16 | 57204541 | 57207585 | 3045   | 3   | 5.287668  | 0.225018 | 57204170 | 57204913 | 57206938 | 5720823: |
| 515 NA12155 | [2515685 chr16 | 16 | 68702274 | 68705042 | 2769   | 4   | -0.483609 | 0.080029 | 68701593 | 68702955 | 68704880 | 6870520- |
| 516 NA12155 | [2515685 chr16 | 16 | 68706855 | 68756350 | 49496  | 54  | -0.638597 | 0.020734 | 68705436 | 68708274 | 68755896 | 6875680! |
| 517 NA12155 | [2515685 chr16 | 16 | 70647868 | 70653409 | 5542   | 7   | 0.288486  | 0.055946 | 70647656 | 70648081 | 70653186 | 7065363: |
| 518 NA12155 | [2515685 chr16 | 16 | 72921362 | 72965445 | 44084  | 41  | -0.459441 | 0.023239 | 72920922 | 72921803 | 72964811 | 7296607! |
| 519 NA12155 | [2515685 chr16 | 16 | 74033566 | 74036312 | 2747   | 4   | -0.38235  | 0.073845 | 74033190 | 74033943 | 74035963 | 7403666: |
| 520 NA12155 | [2515685 chr16 | 16 | 76928915 | 76942282 | 13368  | 11  | 0.700849  | 0.046315 | 76928609 | 76929221 | 76941602 | 7694296: |
| 521 NA12155 | [2515685 chr16 | 16 | 83994929 | 84004171 | 9243   | 81  | -0.269018 | 0.014694 | 83994558 | 83995300 | 84003767 | 8400457! |
| 522 NA12155 | [2515685 chr16 | 16 | 86669849 | 86672366 | 2518   | 2   | -0.91979  | 0.116692 | 86669288 | 86670411 | 86671217 | 8667351! |
| 523 NA12155 | [2515685 chr16 | 16 | 88164134 | 88200619 | 36486  | 30  | 0.267317  | 0.027968 | 88163792 | 88164476 | 88198736 | 8820255! |
| 524 NA12155 | [2515685 chr16 | 16 | 88472817 | 88473962 | 1146   | 11  | 0.283752  | 0.04731  | 88472495 | 88473140 | 88473770 | 8847415! |
| 525 NA12155 | [2515685 chr16 | 16 | 88710329 | 88712266 | 1938   | 10  | -0.297851 | 0.051345 | 88710203 | 88710456 | 88712200 | 8871233: |
| 526 NA12155 | [2515685 chr17 | 17 | 957761   | 974361   | 16601  | 36  | 0.30559   | 0.025661 | 957448   | 958075   | 974003   | 97472C   |
| 527 NA12155 | [2515685 chr17 | 17 | 18306470 | 18307337 | 868    | 2   | 0.776565  | 0.092952 | 18306190 | 18306750 | 18306916 | 1830775! |
| 528 NA12155 | [2515685 chr17 | 17 | 18331739 | 18332345 | 607    | 2   | -0.635759 | 0.097338 | 18331509 | 18331970 | 18331978 | 1833271: |
| 529 NA12155 | [2515685 chr17 | 17 | 19026058 | 19029322 | 3265   | 3   | -0.413491 | 0.082063 | 19025712 | 19026404 | 19029317 | 1902932: |
| 530 NA12155 | [2515685 chr17 | 17 | 19036749 | 19040012 | 3264   | 3   | -0.413491 | 0.082063 | 19036744 | 19036754 | 19039666 | 1904035! |
| 531 NA12155 | [2515685 chr17 | 17 | 20299935 | 20300531 | 597    | 2   | -0.635761 | 0.097338 | 20299568 | 20300303 | 20300311 | 2030075  |
| 532 NA12155 | [2515685 chr17 | 17 | 20325192 | 20325864 | 673    | 2   | 0.776565  | 0.092952 | 20324968 | 20325416 | 20325582 | 2032614! |
| 533 NA12155 | [2515685 chr17 | 17 | 21825576 | 21837996 | 12421  | 9   | 0.430561  | 0.043033 | 21824915 | 21826238 | 21835794 | 2184235: |
| 534 NA12155 | [2515685 chr17 | 17 | 21946928 | 21951091 | 4164   | 7   | -0.392556 | 0.053256 | 21946587 | 21947270 | 21950751 | 2195143  |
| 535 NA12155 | [2515685 chr17 | 17 | 21985286 | 21989661 | 4376   | 5   | -0.613927 | 0.072449 | 21985012 | 21985561 | 21989141 | 2199018  |
| 536 NA12155 | [2515685 chr17 | 17 | 23101576 | 23107074 | 5499   | 10  | 0.28674   | 0.044804 | 23101223 | 23101930 | 23106869 | 2310727! |
| 537 NA12155 | [2515685 chr17 | 17 | 31430406 | 31439351 | 8946   | 14  | 0.256834  | 0.04132  | 31429658 | 31431155 | 31439129 | 3143957- |
| 538 NA12155 | [2515685 chr17 | 17 | 31506465 | 31529424 | 22960  | 59  | -0.296645 | 0.01759  | 31506035 | 31506896 | 31529243 | 3152960! |
| 539 NA12155 | [2515685 chr17 | 17 | 31533714 | 31547926 | 14213  | 22  | 0.475051  | 0.027494 | 31533363 | 31534065 | 31547521 | 3154833  |
| 540 NA12155 | [2515685 chr17 | 17 | 31578624 | 31617468 | 38845  | 96  | -0.289726 | 0.013823 | 31578609 | 31578640 | 31617287 | 3161764! |
| 541 NA12155 | [2515685 chr17 | 17 | 31621895 | 31649500 | 27606  | 39  | 0.46107   | 0.020971 | 31621668 | 31622123 | 31649095 | 3164990! |
| 542 NA12155 | [2515685 chr17 | 17 | 31680187 | 31832493 | 152307 | 131 | -0.325968 | 0.008744 | 31680172 | 31680203 | 31832302 | 3183268- |
| 543 NA12155 | [2515685 chr17 | 17 | 31834979 | 31883532 | 48554  | 85  | -0.325968 | 0.008744 | 31834744 | 31835215 | 31883351 | 3188371: |
| 544 NA12155 | [2515685 chr17 | 17 | 31885940 | 31889223 | 3284   | 6   | -0.325968 | 0.008744 | 31885795 | 31886086 | 31888786 | 3188966  |
| 545 NA12155 | [2515685 chr17 | 17 | 33324385 | 33354516 | 30132  | 31  | -0.380546 | 0.006566 | 33323841 | 33324930 | 33354273 | 3335475! |
| 546 NA12155 | [2515685 chr17 | 17 | 33357428 | 33553833 | 196406 | 243 | -0.380546 | 0.006566 | 33357178 | 33357679 | 33553386 | 3355428! |
| 547 NA12155 | [2515685 chr17 | 17 | 33556075 | 33659558 | 103484 | 159 | -0.380546 | 0.006566 | 33555830 | 33556321 | 33658997 | 3366011! |
| 548 NA12155 | [2515685 chr17 | 17 | 36675530 | 36685343 | 9814   | 10  | -0.765771 | 0.051412 | 36675011 | 36676049 | 36684647 | 3668604! |
| 549 NA12155 | [2515685 chr17 | 17 | 41006614 | 41011870 | 5257   | 7   | -0.385935 | 0.057516 | 41006215 | 41007013 | 41011558 | 4101218: |
| 550 NA12155 | [2515685 chr17 | 17 | 41018715 | 41057874 | 39160  | 38  | 0.349019  | 0.023506 | 41018308 | 41019122 | 41057497 | 4105825  |
| 551 NA12155 | [2515685 chr17 | 17 | 41568884 | 42137412 | 568529 | 638 | 0.295253  | 0.005475 | 41568208 | 41569561 | 42135210 | 4214194! |
| 552 NA12155 | [2515685 chr17 | 17 | 42970703 | 43026670 | 55968  | 86  | -0.464037 | 0.016386 | 42970185 | 42971221 | 43025568 | 4302777: |
| 553 NA12155 | [2515685 chr17 | 17 | 54718891 | 54720406 | 1516   | 2   | -1.004502 | 0.127483 | 54718493 | 54719289 | 54719841 | 5472097  |
| 554 NA12155 | [2515685 chr17 | 17 | 55434888 | 55452955 | 18068  | 34  | -0.271421 | 0.023891 | 55434445 | 55435332 | 55452577 | 5545333- |
| 555 NA12155 | [2515685 chr17 | 17 | 55540472 | 55553809 | 13338  | 9   | 0.284004  | 0.046433 | 55531236 | 55542674 | 55553161 | 5555445! |
| 556 NA12155 | [2515685 chr17 | 17 | 60343567 | 60353962 | 10396  | 8   | 0.566698  | 0.055118 | 60341867 | 60345268 | 60353423 | 6035450  |
| 557 NA12155 | [2515685 chr18 | 18 | 12386896 | 12388854 | 1959   | 2   | 0.483143  | 0.089909 | 12386442 | 12387350 | 12388203 | 1238950! |
| 558 NA12155 | [2515685 chr18 | 18 | 14172514 | 14177894 | 5381   | 9   | 0.260677  | 0.047569 | 14172152 | 14172877 | 14177639 | 1417814! |
| 559 NA12155 | [2515685 chr18 | 18 | 14246928 | 14322605 | 75678  | 22  | 0.433241  | 0.03068  | 14244529 | 14249327 | 14320558 | 1432465: |
| 560 NA12155 | [2515685 chr18 | 18 | 14547645 | 14572648 | 25004  | 25  | -0.25652  | 0.029183 | 14547186 | 14548104 | 14572112 | 1457318- |
| 561 NA12155 | [2515685 chr18 | 18 | 14726980 | 14733704 | 6725   | 9   | -0.460225 | 0.049934 | 14726667 | 14727294 | 14733077 | 1473433: |
| 562 NA12155 | [2515685 chr18 | 18 | 28142218 | 28143399 | 1182   | 2   | 0.802107  | 0.129129 | 28141854 | 28142583 | 28143055 | 2814374- |
| 563 NA12155 | [2515685 chr18 | 18 | 36514289 | 36521090 | 6802   | 6   | -0.931813 | 0.06857  | 36513759 | 36514820 | 36520512 | 3652166! |
| 564 NA12155 | [2515685 chr18 | 18 | 42797012 | 42815381 | 18370  | 21  | -0.286559 | 0.029698 | 42796537 | 42797488 | 42810800 | 4288915- |
| 565 NA12155 | [2515685 chr18 | 18 | 61874791 | 61883105 | 8315   | 9   | -0.902556 | 0.054183 | 61874483 | 61875100 | 61882738 | 6188347: |
| 566 NA12155 | [2515685 chr18 | 18 | 61917747 | 61920171 | 2425   | 4   | 4.34913   | 0.178975 | 61917522 | 61917973 | 61919646 | 6192069  |
| 567 NA12155 | [2515685 chr18 | 18 | 63110008 | 63115099 | 5092   | 7   | -1.055205 | 0.069035 | 63109644 | 63110373 | 63114764 | 6311543- |



|             |                |    |          |          |        |     |           |          |          |          |          |          |
|-------------|----------------|----|----------|----------|--------|-----|-----------|----------|----------|----------|----------|----------|
| 568 NA12155 | [2515685 chr18 | 18 | 74230393 | 74234275 | 3883   | 31  | -0.852362 | 0.022901 | 74229835 | 74230952 | 74234139 | 7423441; |
| 569 NA12155 | [2515685 chr18 | 18 | 74392800 | 74398225 | 5426   | 4   | 0.635941  | 0.085698 | 74390826 | 74394774 | 74397790 | 74398660 |
| 570 NA12155 | [2515685 chr19 | 19 | 8823     | 75793    | 66971  | 65  | 0.278845  | 0.017795 | 6292     | 11354    | 73262    | 79306    |
| 571 NA12155 | [2515685 chr19 | 19 | 255224   | 264649   | 9426   | 14  | 0.27682   | 0.040371 | 254742   | 255707   | 264302   | 264997   |
| 572 NA12155 | [2515685 chr19 | 19 | 310414   | 312953   | 2540   | 14  | -0.759532 | 0.039173 | 309687   | 311142   | 312913   | 312994   |
| 573 NA12155 | [2515685 chr19 | 19 | 1200296  | 1202522  | 2227   | 3   | 0.667867  | 0.093672 | 1199725  | 1200868  | 1202197  | 120284;  |
| 574 NA12155 | [2515685 chr19 | 19 | 8708780  | 8760468  | 51689  | 89  | 0.34692   | 0.013721 | 8708296  | 8709264  | 8760209  | 876072;  |
| 575 NA12155 | [2515685 chr19 | 19 | 23007900 | 23014812 | 6913   | 7   | 0.646746  | 0.067007 | 22990964 | 23010431 | 23014157 | 2301546; |
| 576 NA12155 | [2515685 chr19 | 19 | 24147959 | 24148730 | 772    | 3   | -0.985634 | 0.094425 | 24147835 | 24148083 | 24148193 | 2414926; |
| 577 NA12155 | [2515685 chr19 | 19 | 24152399 | 24155800 | 3402   | 23  | 0.259313  | 0.030626 | 24152364 | 24152435 | 24155376 | 2415622- |
| 578 NA12155 | [2515685 chr19 | 19 | 39419234 | 39422498 | 3265   | 5   | 0.548276  | 0.070712 | 39418853 | 39419616 | 39421681 | 3942331; |
| 579 NA12155 | [2515685 chr19 | 19 | 42534741 | 42540351 | 5611   | 2   | -0.599384 | 0.11445  | 42530910 | 42537272 | 42537820 | 4254471; |
| 580 NA12155 | [2515685 chr19 | 19 | 43952681 | 43954136 | 1456   | 2   | 0.531183  | 0.096531 | 43952054 | 43953308 | 43953980 | 4395429; |
| 581 NA12155 | [2515685 chr19 | 19 | 43973541 | 43974792 | 1252   | 2   | 0.531183  | 0.096531 | 43973385 | 43973697 | 43974369 | 4397521; |
| 582 NA12155 | [2515685 chr19 | 19 | 43974792 | 43977294 | 2503   | 2   | -0.581611 | 0.105352 | 43974369 | 43975216 | 43975620 | 4397896; |
| 583 NA12155 | [2515685 chr19 | 19 | 48288044 | 48290664 | 2621   | 3   | -0.762334 | 0.115887 | 48287641 | 48288447 | 48289625 | 4829170; |
| 584 NA12155 | [2515685 chr19 | 19 | 48475640 | 48477630 | 1991   | 3   | -0.779501 | 0.118543 | 48475574 | 48475707 | 48476571 | 4847868; |
| 585 NA12155 | [2515685 chr19 | 19 | 48492530 | 48503542 | 11013  | 15  | -0.634131 | 0.040587 | 48490564 | 48494496 | 48503314 | 4850377- |
| 586 NA12155 | [2515685 chr19 | 19 | 48524218 | 48527383 | 3166   | 2   | -0.666234 | 0.102161 | 48512660 | 48526749 | 48527113 | 4852765- |
| 587 NA12155 | [2515685 chr19 | 19 | 48530735 | 48535646 | 4912   | 5   | -0.8605   | 0.078195 | 48529507 | 48531963 | 48535486 | 4853580- |
| 588 NA12155 | [2515685 chr19 | 19 | 53098479 | 53154327 | 55849  | 104 | -0.396831 | 0.012719 | 53098017 | 53098941 | 53152350 | 5315630- |
| 589 NA12155 | [2515685 chr19 | 19 | 54879294 | 54886444 | 7151   | 11  | 0.298902  | 0.045529 | 54878825 | 54879763 | 54886190 | 5488669- |
| 590 NA12155 | [2515685 chr19 | 19 | 55285877 | 55336157 | 50281  | 104 | -0.3984   | 0.012615 | 55285730 | 55286025 | 55335244 | 5533707- |
| 591 NA12155 | [2515685 chr19 | 19 | 56826070 | 56836311 | 10242  | 8   | -0.865356 | 0.057606 | 56825810 | 56826331 | 56834905 | 5683771- |
| 592 NA12155 | [2515685 chr19 | 19 | 56839030 | 56840752 | 1723   | 3   | -0.742928 | 0.096484 | 56838811 | 56839249 | 56840372 | 5684113- |
| 593 NA12155 | [2515685 chr19 | 19 | 58169057 | 58171564 | 2508   | 2   | 0.594086  | 0.097075 | 58168791 | 58169324 | 58171021 | 5817210- |
| 594 NA12155 | [2515685 chr19 | 19 | 58211794 | 58244458 | 32665  | 25  | -0.794226 | 0.032142 | 58211007 | 58212582 | 58243893 | 5824502- |
| 595 NA12155 | [2515685 chr19 | 19 | 59247755 | 59252981 | 5227   | 6   | 0.936609  | 0.067734 | 59246427 | 59249084 | 59252269 | 5925369- |
| 596 NA12155 | [2515685 chr19 | 19 | 59492384 | 59498950 | 6567   | 7   | 0.449819  | 0.055952 | 59491977 | 59492791 | 59497077 | 5950082- |
| 597 NA12155 | [2515685 chr19 | 19 | 60166764 | 60170745 | 3982   | 2   | 0.58834   | 0.088525 | 60165407 | 60168121 | 60169211 | 6017227- |
| 598 NA12155 | [2515685 chr19 | 19 | 60958920 | 60976029 | 17110  | 15  | -0.461543 | 0.038142 | 60957933 | 60959907 | 60975748 | 6097631- |
| 599 NA12155 | [2515685 chr20 | 20 | 1511097  | 1532477  | 21381  | 26  | -2.418384 | 0.053226 | 1510534  | 1511660  | 1532182  | 153277-  |
| 600 NA12155 | [2515685 chr20 | 20 | 1534463  | 1535141  | 679    | 2   | -0.749164 | 0.112157 | 1534231  | 1534696  | 1534879  | 153540-  |
| 601 NA12155 | [2515685 chr20 | 20 | 35736931 | 35738843 | 1913   | 2   | 1.368108  | 0.131024 | 35736234 | 35737629 | 35738606 | 3573908- |
| 602 NA12155 | [2515685 chr20 | 20 | 44695347 | 44696738 | 1392   | 2   | 0.61504   | 0.103861 | 44695122 | 44695572 | 44696249 | 4469722- |
| 603 NA12155 | [2515685 chr20 | 20 | 59950373 | 59957050 | 6678   | 19  | 0.335374  | 0.031633 | 59950066 | 59950681 | 59956538 | 5995756- |
| 604 NA12155 | [2515685 chr20 | 20 | 61708834 | 61711805 | 2972   | 22  | -0.402181 | 0.030688 | 61708573 | 61709096 | 61711616 | 6171199- |
| 605 NA12155 | [2515685 chr20 | 20 | 62066380 | 62068214 | 1835   | 8   | 1.982963  | 0.063635 | 62066146 | 62066615 | 62067671 | 6206875- |
| 606 NA12155 | [2515685 chr20 | 20 | 62233505 | 62235897 | 2393   | 4   | 0.57531   | 0.062596 | 62232847 | 62234163 | 62235101 | 6223669- |
| 607 NA12155 | [2515685 chr20 | 20 | 62371216 | 62373725 | 2510   | 3   | 0.610018  | 0.084425 | 62370954 | 62371479 | 62373315 | 6237413- |
| 608 NA12155 | [2515685 chr21 | 21 | 10123436 | 10129765 | 6330   | 3   | -0.494818 | 0.088433 | 10119943 | 10126929 | 10128450 | 1013108- |
| 609 NA12155 | [2515685 chr21 | 21 | 13961915 | 13968799 | 6885   | 6   | -0.389143 | 0.057972 | 13961738 | 13962093 | 13967342 | 1397025- |
| 610 NA12155 | [2515685 chr21 | 21 | 13976132 | 13977791 | 1660   | 5   | -0.420123 | 0.066416 | 13975943 | 13976322 | 13977550 | 1397803- |
| 611 NA12155 | [2515685 chr21 | 21 | 14150623 | 14197493 | 46871  | 16  | 0.422315  | 0.035384 | 14145265 | 14155981 | 14194870 | 1420011- |
| 612 NA12155 | [2515685 chr21 | 21 | 39873854 | 39875347 | 1494   | 2   | 0.486023  | 0.096218 | 39873097 | 39874611 | 39875064 | 3987563- |
| 613 NA12155 | [2515685 chr22 | 22 | 14474806 | 14747237 | 272432 | 514 | -0.461542 | 0.005533 | 14474622 | 14474991 | 14746998 | 1474747- |
| 614 NA12155 | [2515685 chr22 | 22 | 14749024 | 14832930 | 83907  | 146 | -0.461542 | 0.005533 | 14748545 | 14749504 | 14831369 | 1483449- |
| 615 NA12155 | [2515685 chr22 | 22 | 17138810 | 17227543 | 88734  | 141 | 0.32283   | 0.011927 | 17137228 | 17140393 | 17227202 | 1722788- |
| 616 NA12155 | [2515685 chr22 | 22 | 18744519 | 18781478 | 36960  | 37  | -0.321698 | 0.012911 | 18742262 | 18746777 | 18781106 | 1878185- |
| 617 NA12155 | [2515685 chr22 | 22 | 18783375 | 18796475 | 13101  | 20  | -0.321698 | 0.012911 | 18783049 | 18783701 | 18796170 | 1879678- |
| 618 NA12155 | [2515685 chr22 | 22 | 18800091 | 18816071 | 15981  | 18  | -0.321698 | 0.012911 | 18800036 | 18800147 | 18815395 | 1881674- |
| 619 NA12155 | [2515685 chr22 | 22 | 18821034 | 18850813 | 29780  | 33  | -0.321698 | 0.012911 | 18820518 | 18821550 | 18850533 | 1885109- |
| 620 NA12155 | [2515685 chr22 | 22 | 19380073 | 19571209 | 191137 | 14  | -0.382686 | 0.039735 | 19377752 | 19382395 | 19568526 | 1966688- |
| 621 NA12155 | [2515685 chr22 | 22 | 19789638 | 19829874 | 40237  | 80  | 0.270927  | 0.015789 | 19788642 | 19790634 | 19829808 | 1982994- |
| 622 NA12155 | [2515685 chr22 | 22 | 19889869 | 19980262 | 90394  | 134 | 0.32803   | 0.01215  | 19888321 | 19891418 | 19979921 | 1998060- |

|             |                |    |           |           |        |     |                    |           |           |           |           |
|-------------|----------------|----|-----------|-----------|--------|-----|--------------------|-----------|-----------|-----------|-----------|
| 623 NA12155 | [2515685 chr22 | 22 | 20047736  | 20063725  | 15990  | 21  | -0.281629 0.008718 | 20047456  | 20048017  | 20063575  | 2006387!  |
| 624 NA12155 | [2515685 chr22 | 22 | 20067469  | 20098506  | 31038  | 46  | -0.281629 0.008718 | 20067261  | 20067678  | 20098451  | 2009856;  |
| 625 NA12155 | [2515685 chr22 | 22 | 20102124  | 20121795  | 19672  | 38  | -0.281629 0.008718 | 20101819  | 20102429  | 20121548  | 2012204;  |
| 626 NA12155 | [2515685 chr22 | 22 | 20136321  | 20209861  | 73541  | 106 | -0.281629 0.008718 | 20136081  | 20136561  | 20209409  | 2021031;  |
| 627 NA12155 | [2515685 chr22 | 22 | 20212179  | 20225049  | 12871  | 19  | -0.281629 0.008718 | 20211948  | 20212411  | 20224841  | 2022525!  |
| 628 NA12155 | [2515685 chr22 | 22 | 20228794  | 20243644  | 14851  | 12  | -0.281629 0.008718 | 20228644  | 20228944  | 20240961  | 2030228;  |
| 629 NA12155 | [2515685 chr22 | 22 | 22604850  | 22611178  | 6329   | 9   | 0.28632 0.045658   | 22603026  | 22606675  | 22609725  | 2261263'  |
| 630 NA12155 | [2515685 chr22 | 22 | 22611178  | 22657783  | 46606  | 86  | -0.260911 0.016313 | 22609725  | 22612631  | 22657533  | 2265803-  |
| 631 NA12155 | [2515685 chr22 | 22 | 22666516  | 22668682  | 2167   | 5   | 0.394667 0.063578  | 22666496  | 22666536  | 22668305  | 2266906!  |
| 632 NA12155 | [2515685 chr22 | 22 | 22668682  | 22683930  | 15249  | 15  | 1.160891 0.026128  | 22668305  | 22669060  | 22681309  | 2268655;  |
| 633 NA12155 | [2515685 chr22 | 22 | 22690382  | 22720154  | 29773  | 33  | 1.160891 0.026128  | 22690146  | 22690619  | 22719882  | 2272042!  |
| 634 NA12155 | [2515685 chr22 | 22 | 22720446  | 22729265  | 8820   | 12  | 0.488986 0.042203  | 22720426  | 22720466  | 22728912  | 2272961!  |
| 635 NA12155 | [2515685 chr22 | 22 | 22977797  | 22986040  | 8244   | 16  | 0.308197 0.034218  | 22977114  | 22978480  | 22985733  | 2298634'  |
| 636 NA12155 | [2515685 chr22 | 22 | 23246080  | 23375407  | 129328 | 35  | 0.275431 0.023604  | 23186178  | 23248763  | 23375164  | 2337565!  |
| 637 NA12155 | [2515685 chr22 | 22 | 33619409  | 33623490  | 4082   | 5   | 0.836965 0.070368  | 33618939  | 33619879  | 33622642  | 3362433!  |
| 638 NA12155 | [2515685 chr22 | 22 | 37617530  | 37624014  | 6485   | 8   | -3.13392 0.105833  | 37616333  | 37618728  | 37621331  | 3762705!  |
| 639 NA12155 | [2515685 chr22 | 22 | 43418479  | 43419675  | 1197   | 2   | 0.638738 0.100914  | 43418051  | 43418907  | 43419378  | 4341997;  |
| 640 NA12155 | [2515685 chrX  | 23 | 2410848   | 2414786   | 3939   | 5   | 0.470923 0.071111  | 2410165   | 2411532   | 2413919   | 241565-   |
| 641 NA12155 | [2515685 chrX  | 23 | 9180946   | 9192056   | 11111  | 15  | 0.258453 0.037565  | 9180514   | 9181379   | 9191527   | 919258!   |
| 642 NA12155 | [2515685 chrX  | 23 | 56677475  | 56690665  | 13191  | 31  | 0.527665 0.022811  | 56677130  | 56677820  | 56690311  | 5669101!  |
| 643 NA12155 | [2515685 chrX  | 23 | 56701963  | 56703209  | 1247   | 2   | 0.64998 0.121916   | 56701752  | 56702175  | 56702945  | 5670347;  |
| 644 NA12155 | [2515685 chrX  | 23 | 103133933 | 103143075 | 9143   | 2   | 0.535099 0.102682  | 103130384 | 103137482 | 103142681 | 10314347! |
| 645 NA12155 | [2515685 chrX  | 23 | 114790569 | 114791196 | 628    | 2   | -0.896173 0.105511 | 114790348 | 114790791 | 114791030 | 11479136  |
| 646 NA12155 | [2515685 chrX  | 23 | 118992676 | 118993416 | 741    | 3   | 0.439551 0.083131  | 118992641 | 118992711 | 118993261 | 11899357! |
| 647 NA12155 | [2515685 chrX  | 23 | 119074519 | 119075260 | 742    | 3   | 0.439551 0.083131  | 119074364 | 119074675 | 119075225 | 11907529  |
| 648 NA12155 | [2515685 chrX  | 23 | 119791965 | 119844836 | 52872  | 77  | -0.28343 0.014466  | 119791661 | 119792270 | 119844499 | 11984517  |
| 649 NA12155 | [2515685 chrX  | 23 | 134473244 | 134478007 | 4764   | 3   | 0.516701 0.092531  | 134472803 | 134473686 | 134474706 | 13448130  |
| 650 NA12155 | [2515685 chrX  | 23 | 134569408 | 134621112 | 51705  | 102 | -0.377956 0.009143 | 134569294 | 134569522 | 134617467 | 13462475  |
| 651 NA12155 | [2515685 chrX  | 23 | 134650123 | 134695963 | 45841  | 99  | -0.377956 0.009143 | 134646461 | 134653786 | 134695790 | 13469613  |
| 652 NA12155 | [2515685 chrX  | 23 | 134751334 | 134760647 | 9314   | 13  | -0.256139 0.040146 | 134750876 | 134751792 | 134758905 | 13476239  |
| 653 NA12155 | [2515685 chrX  | 23 | 140718840 | 140720134 | 1295   | 2   | 0.658885 0.104001  | 140718574 | 140719107 | 140719983 | 14072028  |
| 654 NA12155 | [2515685 chrX  | 23 | 148771488 | 148779995 | 8508   | 18  | 0.273225 0.036606  | 148771244 | 148771732 | 148779887 | 14878010  |
| 655 NA12155 | [2515685 chrX  | 23 | 153089347 | 153141187 | 51841  | 62  | 0.253237 0.018505  | 153088274 | 153090420 | 153140114 | 15314226  |
| 656 NA12155 | [2515685 chrY  | 24 | 2410848   | 2414786   | 3939   | 5   | 0.470923 0.071111  | 2410165   | 2411532   | 2413919   | 241565-   |
| 657 NA12155 | [2515685 chrY  | 24 | 9187692   | 9209777   | 22086  | 72  | 0.342465 0.017351  | 9187624   | 9187760   | 9209508   | 921004!   |
| 658 NA12155 | [2515685 chrY  | 24 | 10459426  | 10460297  | 872    | 2   | 0.612193 0.105216  | 10459317  | 10459536  | 10459920  | 1046067!  |
| 659 NA12155 | [2515685 chrY  | 24 | 21992543  | 22054211  | 61669  | 199 | 0.318682 0.005608  | 21992253  | 21992833  | 22054143  | 2205427!  |
| 660 NA12155 | [2515685 chrY  | 24 | 22359472  | 22410544  | 51073  | 160 | 0.318682 0.005608  | 22359404  | 22359540  | 22410530  | 2241055!  |
| 661 NA12155 | [2515685 chrY  | 24 | 22650628  | 22671548  | 20921  | 70  | 0.425335 0.015644  | 22649721  | 22651535  | 22671238  | 2267185!  |
| 662 NA12155 | [2515685 chrY  | 24 | 22797436  | 22798350  | 915    | 3   | 0.544974 0.075898  | 22797160  | 22797713  | 22797960  | 2279874'  |
| 663 NA12155 | [2515685 chrY  | 24 | 22883410  | 22905218  | 21809  | 69  | 0.420375 0.015758  | 22883100  | 22883721  | 22905194  | 2290524;  |
| 664 NA12155 | [2515685 chrY  | 24 | 23621945  | 23649003  | 27059  | 54  | -0.327313 0.008303 | 23621699  | 23622192  | 23648757  | 2364924!  |
| 665 NA12155 | [2515685 chrY  | 24 | 23716390  | 23767305  | 50916  | 119 | -0.327313 0.008303 | 23716144  | 23716636  | 23767059  | 2376755;  |
| 666 NA12155 | [2515685 chrY  | 24 | 25255668  | 25285076  | 29409  | 57  | -0.340137 0.009393 | 25255422  | 25255915  | 25284830  | 2528532;  |
| 667 NA12155 | [2515685 chrY  | 24 | 25341625  | 25382981  | 41357  | 88  | -0.340137 0.009393 | 25341379  | 25341871  | 25382735  | 2538322!  |
| 1 NA11830   | [2515685 chr1  | 1  | 445269    | 624922    | 179654 | 134 | -0.271864 0.01274  | 444422    | 446116    | 624079    | 625766    |
| 2 NA11830   | [2515685 chr1  | 1  | 1853012   | 1854645   | 1634   | 2   | 0.455596 0.091068  | 1852616   | 1853409   | 1853816   | 185547-   |
| 3 NA11830   | [2515685 chr1  | 1  | 12843376  | 12849129  | 5754   | 8   | 0.56166 0.051423   | 12843104  | 12843649  | 12848769  | 1284949!  |
| 4 NA11830   | [2515685 chr1  | 1  | 12884329  | 12886858  | 2530   | 4   | 0.508279 0.057073  | 12884224  | 12884434  | 12886536  | 1288718!  |
| 5 NA11830   | [2515685 chr1  | 1  | 12893626  | 12931133  | 37508  | 83  | 0.26028 0.014371   | 12893265  | 12893988  | 12930962  | 1293130-  |
| 6 NA11830   | [2515685 chr1  | 1  | 13114053  | 13162706  | 48654  | 105 | 0.251414 0.012253  | 13113809  | 13114298  | 13162366  | 1316304'  |
| 7 NA11830   | [2515685 chr1  | 1  | 13300967  | 13373969  | 73003  | 41  | 0.27181 0.01841    | 13300595  | 13301339  | 13373608  | 1337433'  |
| 8 NA11830   | [2515685 chr1  | 1  | 13380737  | 13383503  | 2767   | 4   | 0.540922 0.052575  | 13380415  | 13381060  | 13383163  | 1338384-  |
| 9 NA11830   | [2515685 chr1  | 1  | 16754301  | 16798847  | 44547  | 53  | -0.269699 0.019213 | 16754089  | 16754514  | 16798504  | 1679919   |
| 10 NA11830  | [2515685 chr1  | 1  | 16951179  | 16960152  | 8974   | 8   | -0.356777 0.019692 | 16950818  | 16951540  | 16959445  | 1696085!  |

|            |               |   |           |           |        |     |           |          |           |           |           |           |
|------------|---------------|---|-----------|-----------|--------|-----|-----------|----------|-----------|-----------|-----------|-----------|
| 11 NA11830 | [2515685 chr1 | 1 | 16975906  | 17007421  | 31516  | 34  | -0.356777 | 0.019692 | 16975406  | 16976406  | 17006449  | 1700839:  |
| 12 NA11830 | [2515685 chr1 | 1 | 72467674  | 72476358  | 8685   | 5   | -0.92993  | 0.07225  | 72467220  | 72468129  | 72475692  | 7247702:  |
| 13 NA11830 | [2515685 chr1 | 1 | 76956200  | 77005045  | 48846  | 46  | -0.866864 | 0.022545 | 76955852  | 76956548  | 77004773  | 7700531:  |
| 14 NA11830 | [2515685 chr1 | 1 | 89188117  | 89190762  | 2646   | 5   | 1.498234  | 0.092019 | 89187764  | 89188470  | 89190458  | 8919106:  |
| 15 NA11830 | [2515685 chr1 | 1 | 103827497 | 103834166 | 6670   | 16  | 0.597465  | 0.004111 | 103827175 | 103827820 | 103833999 | 10383433: |
| 16 NA11830 | [2515685 chr1 | 1 | 103852783 | 104015739 | 162957 | 263 | 0.785222  | 0.008015 | 103852543 | 103853023 | 104013178 | 10401830: |
| 17 NA11830 | [2515685 chr1 | 1 | 104027802 | 104029695 | 1894   | 2   | 0.717254  | 0.106464 | 104027515 | 104028090 | 104028575 | 10403081: |
| 18 NA11830 | [2515685 chr1 | 1 | 105728161 | 105735462 | 7302   | 8   | -1.024041 | 0.062116 | 105727820 | 105728503 | 105734532 | 10573639: |
| 19 NA11830 | [2515685 chr1 | 1 | 108484830 | 108485270 | 441    | 2   | -0.429705 | 0.085808 | 108484660 | 108485001 | 108485002 | 10848553: |
| 20 NA11830 | [2515685 chr1 | 1 | 108514938 | 108564480 | 49543  | 54  | 0.356059  | 0.02014  | 108514864 | 108515012 | 108564416 | 10856454: |
| 21 NA11830 | [2515685 chr1 | 1 | 108637709 | 108688767 | 51059  | 60  | 0.357708  | 0.019029 | 108637480 | 108637939 | 108688693 | 10868884: |
| 22 NA11830 | [2515685 chr1 | 1 | 108718399 | 108718839 | 441    | 2   | -0.429705 | 0.085808 | 108718131 | 108718668 | 108718669 | 10871901: |
| 23 NA11830 | [2515685 chr1 | 1 | 112405902 | 112416691 | 10790  | 10  | 0.751264  | 0.050717 | 112405415 | 112406389 | 112416423 | 11241696: |
| 24 NA11830 | [2515685 chr1 | 1 | 120244720 | 120342422 | 97703  | 151 | 0.273565  | 0.01136  | 120243262 | 120246178 | 120342303 | 12034254: |
| 25 NA11830 | [2515685 chr1 | 1 | 141867113 | 141868928 | 1816   | 4   | 0.335424  | 0.054524 | 141866939 | 141867287 | 141868709 | 14186914: |
| 26 NA11830 | [2515685 chr1 | 1 | 141965057 | 141981860 | 16804  | 48  | 0.343607  | 0.016607 | 141964948 | 141965167 | 141978581 | 14203010: |
| 27 NA11830 | [2515685 chr1 | 1 | 142046823 | 142049286 | 2464   | 7   | 0.297152  | 0.045946 | 142046745 | 142046901 | 142048944 | 14204962: |
| 28 NA11830 | [2515685 chr1 | 1 | 142092168 | 142099412 | 7245   | 15  | 0.290214  | 0.031992 | 142091944 | 142092393 | 142098977 | 14209984: |
| 29 NA11830 | [2515685 chr1 | 1 | 142438646 | 142569435 | 130790 | 155 | 0.349872  | 0.011487 | 142438189 | 142439104 | 142568775 | 14257009: |
| 30 NA11830 | [2515685 chr1 | 1 | 142678703 | 142781873 | 103171 | 168 | 0.258939  | 0.011098 | 142678583 | 142678823 | 142781489 | 14278225: |
| 31 NA11830 | [2515685 chr1 | 1 | 145091514 | 145109730 | 18217  | 58  | 0.34233   | 0.015569 | 145089695 | 145093333 | 145109552 | 14510990: |
| 32 NA11830 | [2515685 chr1 | 1 | 145383992 | 145402904 | 18913  | 42  | 0.294275  | 0.017926 | 145383814 | 145384171 | 145401111 | 14540469: |
| 33 NA11830 | [2515685 chr1 | 1 | 145546022 | 145564933 | 18912  | 41  | 0.301379  | 0.01819  | 145545844 | 145546201 | 145563140 | 14556672: |
| 34 NA11830 | [2515685 chr1 | 1 | 145819541 | 145839481 | 19941  | 22  | 0.444907  | 0.032188 | 145819262 | 145819821 | 145839093 | 14583986: |
| 35 NA11830 | [2515685 chr1 | 1 | 145927065 | 145951531 | 24467  | 30  | 0.492534  | 0.026454 | 145926783 | 145927347 | 145951467 | 14595159: |
| 36 NA11830 | [2515685 chr1 | 1 | 146326656 | 146344860 | 18205  | 56  | 0.335597  | 0.016133 | 146326478 | 146326834 | 146343057 | 14634666: |
| 37 NA11830 | [2515685 chr1 | 1 | 146808546 | 146809451 | 906    | 2   | -0.569078 | 0.100916 | 146808090 | 146809003 | 146809142 | 14680976: |
| 38 NA11830 | [2515685 chr1 | 1 | 148998878 | 149005918 | 7041   | 13  | 0.765038  | 0.030942 | 148998401 | 148999355 | 149004680 | 14900715: |
| 39 NA11830 | [2515685 chr1 | 1 | 149573040 | 149583431 | 10392  | 6   | 0.871577  | 0.068869 | 149572621 | 149573460 | 149582912 | 14958395: |
| 40 NA11830 | [2515685 chr1 | 1 | 158326052 | 158370891 | 44840  | 53  | -0.257407 | 0.019295 | 158325732 | 158326372 | 158370271 | 15837151: |
| 41 NA11830 | [2515685 chr1 | 1 | 159083853 | 159085602 | 1750   | 2   | 0.579185  | 0.106625 | 159083104 | 159084603 | 159085334 | 15908587: |
| 42 NA11830 | [2515685 chr1 | 1 | 186522369 | 186536971 | 14603  | 10  | -0.325258 | 0.048086 | 186522110 | 186522629 | 186536768 | 18653717: |
| 43 NA11830 | [2515685 chr1 | 1 | 193448820 | 193554182 | 105363 | 88  | 0.431318  | 0.015737 | 193448631 | 193449010 | 193553474 | 19355489: |
| 44 NA11830 | [2515685 chr1 | 1 | 203245415 | 203247868 | 2454   | 2   | 0.911664  | 0.113745 | 203245018 | 203245812 | 203245778 | 20324815: |
| 45 NA11830 | [2515685 chr1 | 1 | 204086494 | 204139817 | 53324  | 72  | 0.413702  | 0.013744 | 204085868 | 204087121 | 204139535 | 20414009: |
| 46 NA11830 | [2515685 chr1 | 1 | 204260266 | 204262118 | 1853   | 3   | 0.466344  | 0.08307  | 204259910 | 204260623 | 204261890 | 20426234: |
| 47 NA11830 | [2515685 chr1 | 1 | 214590557 | 214595063 | 4507   | 10  | -0.285376 | 0.050293 | 214590276 | 214590839 | 214594885 | 21459524: |
| 48 NA11830 | [2515685 chr1 | 1 | 218762650 | 218771442 | 8793   | 8   | 0.464057  | 0.054023 | 218762212 | 218763089 | 218771135 | 21877175: |
| 49 NA11830 | [2515685 chr1 | 1 | 220570241 | 220571400 | 1160   | 2   | 0.823492  | 0.105149 | 220569940 | 220570543 | 220571101 | 22057170: |
| 50 NA11830 | [2515685 chr1 | 1 | 228018199 | 228121107 | 102909 | 96  | 0.48581   | 0.015087 | 228016694 | 228019705 | 228120568 | 22812164: |
| 51 NA11830 | [2515685 chr1 | 1 | 239368545 | 239498531 | 129987 | 15  | -0.40308  | 0.03763  | 239368239 | 239368851 | 239496181 | 23950088: |
| 52 NA11830 | [2515685 chr1 | 1 | 243009520 | 243011368 | 1849   | 3   | -0.573642 | 0.086864 | 243008430 | 243010610 | 243011204 | 24301153: |
| 53 NA11830 | [2515685 chr2 | 2 | 296456    | 298925    | 2470   | 8   | -0.76572  | 0.05439  | 296213    | 296699    | 298661    | 299185:   |
| 54 NA11830 | [2515685 chr2 | 2 | 13466843  | 13511508  | 44666  | 49  | -0.287236 | 0.016837 | 13466538  | 13467148  | 13510995  | 1351202:  |
| 55 NA11830 | [2515685 chr2 | 2 | 13531646  | 13548027  | 16382  | 16  | -0.287236 | 0.016837 | 13530427  | 13532866  | 13547735  | 1354831:  |
| 56 NA11830 | [2515685 chr2 | 2 | 44378695  | 44380701  | 2007   | 3   | -2.783714 | 0.125    | 44378636  | 44378754  | 44379703  | 4438169:  |
| 57 NA11830 | [2515685 chr2 | 2 | 52661573  | 52696869  | 35297  | 26  | -0.992277 | 0.031576 | 52661218  | 52661928  | 52696416  | 5269732:  |
| 58 NA11830 | [2515685 chr2 | 2 | 56563619  | 56567381  | 3763   | 2   | 3.094985  | 0.207408 | 56556559  | 56566577  | 56567035  | 5656772:  |
| 59 NA11830 | [2515685 chr2 | 2 | 73945377  | 73946969  | 1593   | 3   | 0.368348  | 0.062878 | 73945149  | 73945606  | 73946724  | 7394721:  |
| 60 NA11830 | [2515685 chr2 | 2 | 75296507  | 75298934  | 2428   | 2   | 0.907998  | 0.10615  | 75296056  | 75296959  | 75298532  | 7529933:  |
| 61 NA11830 | [2515685 chr2 | 2 | 77887291  | 77900058  | 12768  | 6   | -0.374552 | 0.064342 | 77886951  | 77887631  | 77899882  | 7790023:  |
| 62 NA11830 | [2515685 chr2 | 2 | 87752025  | 87753739  | 1715   | 2   | -0.491602 | 0.097725 | 87751415  | 87752636  | 87752678  | 8775480:  |
| 63 NA11830 | [2515685 chr2 | 2 | 87963983  | 88098957  | 134975 | 14  | 0.253388  | 0.040363 | 87963455  | 87964512  | 88097049  | 8810086:  |
| 64 NA11830 | [2515685 chr2 | 2 | 91489763  | 91550389  | 60627  | 62  | -0.279984 | 0.017509 | 91489674  | 91489852  | 91550292  | 9155048:  |
| 65 NA11830 | [2515685 chr2 | 2 | 94985753  | 94998325  | 12573  | 8   | -0.259702 | 0.051508 | 94984352  | 94987154  | 94996579  | 9500007:  |

|             |               |   |           |           |        |     |           |          |           |           |           |          |
|-------------|---------------|---|-----------|-----------|--------|-----|-----------|----------|-----------|-----------|-----------|----------|
| 66 NA11830  | [2515685 chr2 | 2 | 97184386  | 97189740  | 5355   | 2   | -0.742287 | 0.106064 | 97182781  | 97185992  | 97186782  | 9719672: |
| 67 NA11830  | [2515685 chr2 | 2 | 97613796  | 97614932  | 1137   | 2   | 1.13018   | 0.1237   | 97613553  | 97614040  | 97614467  | 9761539: |
| 68 NA11830  | [2515685 chr2 | 2 | 105846957 | 105849953 | 2997   | 4   | -0.708984 | 0.080654 | 105846601 | 105847313 | 105849426 | 10585048 |
| 69 NA11830  | [2515685 chr2 | 2 | 108313968 | 108314875 | 908    | 2   | 0.645535  | 0.106775 | 108313664 | 108314272 | 108314680 | 10831507 |
| 70 NA11830  | [2515685 chr2 | 2 | 111809680 | 111811642 | 1963   | 2   | -0.491602 | 0.097725 | 111808620 | 111810741 | 111810783 | 11181250 |
| 71 NA11830  | [2515685 chr2 | 2 | 123193457 | 123198547 | 5091   | 4   | -0.816045 | 0.075288 | 123193121 | 123193793 | 123198337 | 12319875 |
| 72 NA11830  | [2515685 chr2 | 2 | 126159437 | 126168349 | 8913   | 3   | -0.846401 | 0.085469 | 126158494 | 126160381 | 126168048 | 12616865 |
| 73 NA11830  | [2515685 chr2 | 2 | 129354604 | 129360182 | 5579   | 4   | -1.232668 | 0.089893 | 129354317 | 129354892 | 129357659 | 12936270 |
| 74 NA11830  | [2515685 chr2 | 2 | 130420955 | 130444724 | 23770  | 20  | -0.274798 | 0.031615 | 130420630 | 130421281 | 130442767 | 13044668 |
| 75 NA11830  | [2515685 chr2 | 2 | 131765076 | 131784546 | 19471  | 30  | -0.281554 | 0.025901 | 131749458 | 131768034 | 131783971 | 13178512 |
| 76 NA11830  | [2515685 chr2 | 2 | 132846945 | 132868265 | 21321  | 12  | 0.472355  | 0.041278 | 132846760 | 132847131 | 132867906 | 13286862 |
| 77 NA11830  | [2515685 chr2 | 2 | 146694140 | 146710744 | 16605  | 17  | 0.794889  | 0.039743 | 146688620 | 146697098 | 146710557 | 14671093 |
| 78 NA11830  | [2515685 chr2 | 2 | 153495545 | 153499409 | 3865   | 2   | 0.604186  | 0.115866 | 153484545 | 153498503 | 153498846 | 15349997 |
| 79 NA11830  | [2515685 chr2 | 2 | 153622711 | 153625256 | 2546   | 3   | 0.995521  | 0.093705 | 153621175 | 153624247 | 153625088 | 15362542 |
| 80 NA11830  | [2515685 chr2 | 2 | 208176479 | 208184457 | 7979   | 7   | 0.895655  | 0.061037 | 208176093 | 208176865 | 208183930 | 20818498 |
| 81 NA11830  | [2515685 chr2 | 2 | 213009234 | 213017482 | 8249   | 9   | -0.935054 | 0.049757 | 213008915 | 213009554 | 213016799 | 21301816 |
| 82 NA11830  | [2515685 chr2 | 2 | 228733891 | 228740566 | 6676   | 4   | -0.814646 | 0.073983 | 228733471 | 228734311 | 228739612 | 22874152 |
| 83 NA11830  | [2515685 chr2 | 2 | 232512469 | 232537143 | 24675  | 6   | -0.453287 | 0.041578 | 232511142 | 232513796 | 232534243 | 23254004 |
| 84 NA11830  | [2515685 chr2 | 2 | 242661256 | 242662332 | 1077   | 7   | 0.437058  | 0.053849 | 242661125 | 242661388 | 242662217 | 24266244 |
| 85 NA11830  | [2515685 chr2 | 2 | 242664580 | 242668683 | 4104   | 10  | 1.392033  | 0.041239 | 242664284 | 242664877 | 242668532 | 24266883 |
| 86 NA11830  | [2515685 chr3 | 3 | 204650    | 209394    | 4745   | 4   | 0.802289  | 0.072913 | 202918    | 206383    | 209009    | 209775   |
| 87 NA11830  | [2515685 chr3 | 3 | 1282960   | 1284261   | 1302   | 2   | -0.596532 | 0.101709 | 1282730   | 1283190   | 1283881   | 1284647  |
| 88 NA11830  | [2515685 chr3 | 3 | 1757211   | 1765710   | 8500   | 2   | 0.917425  | 0.118861 | 1756096   | 1758327   | 1762058   | 1797300  |
| 89 NA11830  | [2515685 chr3 | 3 | 24636987  | 24641068  | 4082   | 3   | 0.43766   | 0.086511 | 24636745  | 24637229  | 24640837  | 24641300 |
| 90 NA11830  | [2515685 chr3 | 3 | 68821474  | 68830847  | 9374   | 17  | -2.526509 | 0.061314 | 68818894  | 68824055  | 68830417  | 68831277 |
| 91 NA11830  | [2515685 chr3 | 3 | 75841822  | 75879757  | 37936  | 21  | 0.28615   | 0.030078 | 75836910  | 75845474  | 75876105  | 75891771 |
| 92 NA11830  | [2515685 chr3 | 3 | 76066312  | 76081451  | 15140  | 19  | -0.32576  | 0.033394 | 76065787  | 76066838  | 76081180  | 7608172: |
| 93 NA11830  | [2515685 chr3 | 3 | 106127289 | 106128660 | 1372   | 2   | -1.001945 | 0.098796 | 106126821 | 106127758 | 106128182 | 10612913 |
| 94 NA11830  | [2515685 chr3 | 3 | 133191392 | 133196576 | 5185   | 5   | -0.840245 | 0.065949 | 133190820 | 133191965 | 133195824 | 13319732 |
| 95 NA11830  | [2515685 chr3 | 3 | 163994592 | 164008330 | 13739  | 18  | 3.063049  | 0.031512 | 163993392 | 163995793 | 164008010 | 16400865 |
| 96 NA11830  | [2515685 chr3 | 3 | 164031307 | 164106273 | 74967  | 71  | 3.063049  | 0.031512 | 164027655 | 164036948 | 164106029 | 16410651 |
| 97 NA11830  | [2515685 chr3 | 3 | 164106273 | 164108502 | 2230   | 2   | 1.085305  | 0.121892 | 164106029 | 164106517 | 164108018 | 16410898 |
| 98 NA11830  | [2515685 chr3 | 3 | 164200660 | 164205886 | 5227   | 5   | -0.984548 | 0.08207  | 164200187 | 164201133 | 164204674 | 16420709 |
| 99 NA11830  | [2515685 chr3 | 3 | 166520583 | 166565852 | 45270  | 50  | -0.911538 | 0.022673 | 166514232 | 166524235 | 166565425 | 16656628 |
| 100 NA11830 | [2515685 chr3 | 3 | 191219813 | 191223326 | 3514   | 4   | 0.82711   | 0.076293 | 191219291 | 191220336 | 191222918 | 19122373 |
| 101 NA11830 | [2515685 chr3 | 3 | 192547312 | 192554331 | 7020   | 10  | 0.880199  | 0.051471 | 192546950 | 192547674 | 192554127 | 19255453 |
| 102 NA11830 | [2515685 chr3 | 3 | 196943342 | 196965802 | 22461  | 19  | -0.62517  | 0.034735 | 196943147 | 196943538 | 196965494 | 19696611 |
| 103 NA11830 | [2515685 chr3 | 3 | 196994475 | 197002965 | 8491   | 10  | 0.66692   | 0.045883 | 196994054 | 196994896 | 197002044 | 19700388 |
| 104 NA11830 | [2515685 chr3 | 3 | 198043467 | 198046340 | 2874   | 4   | -0.407264 | 0.068613 | 198043278 | 198043657 | 198045914 | 19804676 |
| 105 NA11830 | [2515685 chr3 | 3 | 198421889 | 198427408 | 5520   | 3   | 0.780156  | 0.089594 | 198421397 | 198422381 | 198423959 | 19843085 |
| 106 NA11830 | [2515685 chr3 | 3 | 198674426 | 198675470 | 1045   | 6   | -0.398875 | 0.053297 | 198674161 | 198674692 | 198674903 | 19867603 |
| 107 NA11830 | [2515685 chr4 | 4 | 18132     | 54206     | 36075  | 39  | -0.250589 | 0.023332 | 17767     | 18497     | 53809     | 54603    |
| 108 NA11830 | [2515685 chr4 | 4 | 54206     | 57579     | 3374   | 3   | -1.442163 | 0.099429 | 53809     | 54603     | 56974     | 58184    |
| 109 NA11830 | [2515685 chr4 | 4 | 8739800   | 8756949   | 17150  | 26  | 0.534435  | 0.020689 | 8739551   | 8740049   | 8756813   | 8757080  |
| 110 NA11830 | [2515685 chr4 | 4 | 8998171   | 9046719   | 48549  | 87  | 0.927716  | 0.011049 | 8850774   | 9001243   | 9046129   | 9047300  |
| 111 NA11830 | [2515685 chr4 | 4 | 9812346   | 9813108   | 763    | 33  | 0.557439  | 0.020071 | 9812284   | 9812408   | 9812952   | 9813260  |
| 112 NA11830 | [2515685 chr4 | 4 | 34602797  | 34650994  | 48198  | 45  | 0.772472  | 0.023664 | 34601994  | 34603600  | 34649535  | 3465245  |
| 113 NA11830 | [2515685 chr4 | 4 | 64522941  | 64543857  | 20917  | 20  | -0.883014 | 0.036956 | 64522682  | 64523201  | 64542552  | 6454516: |
| 114 NA11830 | [2515685 chr4 | 4 | 69202095  | 69320563  | 118469 | 74  | 1.095944  | 0.022422 | 69201955  | 69202236  | 69320240  | 6932088: |
| 115 NA11830 | [2515685 chr4 | 4 | 69320563  | 69368484  | 47922  | 43  | 0.283421  | 0.017511 | 69320240  | 69320887  | 69365412  | 6938219  |
| 116 NA11830 | [2515685 chr4 | 4 | 69672033  | 69720494  | 48462  | 53  | 0.285198  | 0.016563 | 69671975  | 69672092  | 69717422  | 6973421: |
| 117 NA11830 | [2515685 chr4 | 4 | 70306339  | 70416062  | 109724 | 104 | 0.377932  | 0.014545 | 70306109  | 70306570  | 70415760  | 7041636: |
| 118 NA11830 | [2515685 chr4 | 4 | 87333407  | 87337560  | 4154   | 4   | -0.993746 | 0.081074 | 87333057  | 87333758  | 87337055  | 8733806: |
| 119 NA11830 | [2515685 chr4 | 4 | 116723429 | 116725189 | 1761   | 3   | -0.405521 | 0.080075 | 116723265 | 116723593 | 116725020 | 11672535 |
| 120 NA11830 | [2515685 chr4 | 4 | 124835704 | 124837199 | 1496   | 3   | -0.548386 | 0.079785 | 124835418 | 124835991 | 124836924 | 12483747 |

|             |               |   |           |           |        |     |           |          |           |           |           |           |
|-------------|---------------|---|-----------|-----------|--------|-----|-----------|----------|-----------|-----------|-----------|-----------|
| 121 NA11830 | [2515685 chr4 | 4 | 133536186 | 133540723 | 4538   | 3   | -3.116655 | 0.182951 | 133531398 | 133539258 | 133540462 | 13354098  |
| 122 NA11830 | [2515685 chr4 | 4 | 138537751 | 138549906 | 12156  | 14  | 0.901611  | 0.045374 | 138537443 | 138538059 | 138547414 | 13855239  |
| 123 NA11830 | [2515685 chr4 | 4 | 142588136 | 142590500 | 2365   | 4   | -0.824252 | 0.079875 | 142587774 | 142588498 | 142590303 | 14259069  |
| 124 NA11830 | [2515685 chr4 | 4 | 153147415 | 153151949 | 4535   | 5   | -0.76786  | 0.069851 | 153146836 | 153147995 | 153151358 | 15315254  |
| 125 NA11830 | [2515685 chr4 | 4 | 162237272 | 162242562 | 5291   | 8   | 0.870378  | 0.054535 | 162236487 | 162238058 | 162242381 | 16224274  |
| 126 NA11830 | [2515685 chr4 | 4 | 162312826 | 162317210 | 4385   | 3   | 0.629477  | 0.096335 | 162312706 | 162312947 | 162314138 | 16232117  |
| 127 NA11830 | [2515685 chr4 | 4 | 162806038 | 162809269 | 3232   | 3   | 0.721726  | 0.082628 | 162804872 | 162807204 | 162808734 | 16280980  |
| 128 NA11830 | [2515685 chr4 | 4 | 169183401 | 169368370 | 184970 | 163 | 0.78269   | 0.012103 | 169182712 | 169184090 | 169366713 | 16937002  |
| 129 NA11830 | [2515685 chr4 | 4 | 172750241 | 172755216 | 4976   | 2   | -3.606641 | 0.285669 | 172748887 | 172751596 | 172753256 | 17275717  |
| 130 NA11830 | [2515685 chr4 | 4 | 173363594 | 173367718 | 4125   | 6   | -0.92973  | 0.06339  | 173362583 | 173364606 | 173367283 | 17336815  |
| 131 NA11830 | [2515685 chr4 | 4 | 185535274 | 185545272 | 9999   | 9   | 0.992598  | 0.052971 | 185534955 | 185535593 | 185543276 | 18554726  |
| 132 NA11830 | [2515685 chr4 | 4 | 187728494 | 187732907 | 4414   | 15  | 2.128879  | 0.054698 | 187728193 | 187728795 | 187732541 | 18773327  |
| 133 NA11830 | [2515685 chr4 | 4 | 187742059 | 187743902 | 1844   | 3   | -0.499149 | 0.088258 | 187741734 | 187742385 | 187743519 | 18774428  |
| 134 NA11830 | [2515685 chr4 | 4 | 188255523 | 188269680 | 14158  | 235 | 0.770934  | 0.009171 | 188255215 | 188255831 | 188269403 | 18826995  |
| 135 NA11830 | [2515685 chr4 | 4 | 189799455 | 189807562 | 8108   | 11  | -0.406723 | 0.043241 | 189799180 | 189799730 | 189807064 | 18980806  |
| 136 NA11830 | [2515685 chr4 | 4 | 190846744 | 191059687 | 212944 | 216 | 0.291425  | 0.009671 | 190846486 | 190847002 | 191059242 | 19106013  |
| 137 NA11830 | [2515685 chr4 | 4 | 191142404 | 191143596 | 1193   | 3   | -0.712532 | 0.08701  | 191142135 | 191142673 | 191143215 | 19114397  |
| 138 NA11830 | [2515685 chr5 | 5 | 261631    | 267007    | 5377   | 22  | -0.315117 | 0.03157  | 261032    | 262230    | 266353    | 267662    |
| 139 NA11830 | [2515685 chr5 | 5 | 520743    | 521684    | 942    | 5   | 0.604174  | 0.076296 | 520428    | 521059    | 521427    | 521942    |
| 140 NA11830 | [2515685 chr5 | 5 | 1075284   | 1080515   | 5232   | 25  | 0.301836  | 0.025324 | 1074709   | 1075859   | 1080275   | 108075!   |
| 141 NA11830 | [2515685 chr5 | 5 | 1223248   | 1223930   | 683    | 5   | 0.389615  | 0.051277 | 1223057   | 1223439   | 1223854   | 122400!   |
| 142 NA11830 | [2515685 chr5 | 5 | 1231558   | 1233247   | 1690   | 2   | -0.88199  | 0.099205 | 1231167   | 1231949   | 1232879   | 123361!   |
| 143 NA11830 | [2515685 chr5 | 5 | 12863961  | 12873512  | 9552   | 14  | -0.933256 | 0.045531 | 12863778  | 12864144  | 12873198  | 1287382!  |
| 144 NA11830 | [2515685 chr5 | 5 | 19410747  | 19412172  | 1426   | 3   | -3.322771 | 0.163214 | 19410189  | 19411305  | 19411980  | 1941236!  |
| 145 NA11830 | [2515685 chr5 | 5 | 21309612  | 21426153  | 116542 | 178 | 0.269164  | 0.009341 | 21309357  | 21309867  | 21425562  | 2142674!  |
| 146 NA11830 | [2515685 chr5 | 5 | 22161042  | 22167602  | 6561   | 8   | 0.294509  | 0.053878 | 22160580  | 22161504  | 22167345  | 2216786!  |
| 147 NA11830 | [2515685 chr5 | 5 | 26831997  | 26835654  | 3658   | 3   | -3.197848 | 0.160249 | 26829858  | 26834136  | 26835377  | 2683593!  |
| 148 NA11830 | [2515685 chr5 | 5 | 26836459  | 26837938  | 1480   | 2   | -2.542471 | 0.26977  | 26835932  | 26836987  | 26837469  | 2683840!  |
| 149 NA11830 | [2515685 chr5 | 5 | 61549533  | 61586964  | 37432  | 35  | -0.259282 | 0.023401 | 61549182  | 61549884  | 61586109  | 6158781!  |
| 150 NA11830 | [2515685 chr5 | 5 | 68865200  | 68886836  | 21637  | 45  | 0.443021  | 0.022626 | 68864770  | 68865630  | 68886492  | 6888718!  |
| 151 NA11830 | [2515685 chr5 | 5 | 69045001  | 69184396  | 139396 | 323 | 0.343882  | 0.006138 | 69044855  | 69045147  | 69184180  | 6918461!  |
| 152 NA11830 | [2515685 chr5 | 5 | 69358940  | 69404835  | 45896  | 45  | 0.33059   | 0.016952 | 69358540  | 69359340  | 69404157  | 6940551!  |
| 153 NA11830 | [2515685 chr5 | 5 | 69404835  | 69411352  | 6518   | 6   | 0.845399  | 0.04743  | 69404157  | 69405513  | 69410702  | 6941200!  |
| 154 NA11830 | [2515685 chr5 | 5 | 69624725  | 69744382  | 119658 | 273 | 0.339425  | 0.006691 | 69624579  | 69624871  | 69744181  | 6974458!  |
| 155 NA11830 | [2515685 chr5 | 5 | 69796469  | 69813557  | 17089  | 35  | 0.324919  | 0.018985 | 69796435  | 69796504  | 69813431  | 6981368!  |
| 156 NA11830 | [2515685 chr5 | 5 | 69909302  | 70059544  | 150243 | 315 | 0.334454  | 0.006169 | 69909086  | 69909519  | 70059328  | 7005976!  |
| 157 NA11830 | [2515685 chr5 | 5 | 70234358  | 70280260  | 45903  | 45  | 0.337262  | 0.016982 | 70233958  | 70234758  | 70279582  | 7028093!  |
| 158 NA11830 | [2515685 chr5 | 5 | 70280260  | 70286789  | 6530   | 6   | 0.823205  | 0.047188 | 70279582  | 70280938  | 70286122  | 7028745!  |
| 159 NA11830 | [2515685 chr5 | 5 | 70403953  | 70426554  | 22602  | 43  | 0.461249  | 0.023012 | 70403337  | 70404569  | 70425419  | 7042768!  |
| 160 NA11830 | [2515685 chr5 | 5 | 70613268  | 70695524  | 82257  | 178 | 0.331682  | 0.008414 | 70613054  | 70613483  | 70695390  | 7069565!  |
| 161 NA11830 | [2515685 chr5 | 5 | 81459207  | 81466061  | 6855   | 2   | -1.465003 | 0.124848 | 81455614  | 81462405  | 81462863  | 8147028!  |
| 162 NA11830 | [2515685 chr5 | 5 | 97073481  | 97121673  | 48193  | 65  | -0.897557 | 0.019677 | 97073276  | 97073686  | 97121066  | 9712228!  |
| 163 NA11830 | [2515685 chr5 | 5 | 98692416  | 98694362  | 1947   | 3   | 0.472257  | 0.082762 | 98691745  | 98693087  | 98694014  | 9869471!  |
| 164 NA11830 | [2515685 chr5 | 5 | 98867127  | 98870861  | 3735   | 2   | -1.510037 | 0.155689 | 98864129  | 98870125  | 98870667  | 9887105!  |
| 165 NA11830 | [2515685 chr5 | 5 | 99198142  | 99201119  | 2978   | 2   | -0.895567 | 0.121815 | 99197485  | 99198799  | 99200900  | 9920133!  |
| 166 NA11830 | [2515685 chr5 | 5 | 99408801  | 99419037  | 10237  | 14  | -0.424122 | 0.039685 | 99408605  | 99408997  | 99418328  | 9941974!  |
| 167 NA11830 | [2515685 chr5 | 5 | 106256102 | 106265509 | 9408   | 11  | -1.015778 | 0.047559 | 106255267 | 106256937 | 106262311 | 10626892  |
| 168 NA11830 | [2515685 chr5 | 5 | 122649189 | 122651412 | 2224   | 3   | -0.448377 | 0.088104 | 122648933 | 122649446 | 122650032 | 12265279  |
| 169 NA11830 | [2515685 chr5 | 5 | 137835178 | 137844134 | 8957   | 8   | 0.619285  | 0.05635  | 137834745 | 137835611 | 137843310 | 13784495! |
| 170 NA11830 | [2515685 chr5 | 5 | 140203081 | 140218928 | 15848  | 20  | 2.324187  | 0.055855 | 140202344 | 140203819 | 140218508 | 14021934  |
| 171 NA11830 | [2515685 chr5 | 5 | 140534849 | 140540106 | 5258   | 5   | 0.770996  | 0.066365 | 140534700 | 140534999 | 140539007 | 14054120  |
| 172 NA11830 | [2515685 chr5 | 5 | 151495251 | 151499062 | 3812   | 6   | -0.805316 | 0.068612 | 151494886 | 151495617 | 151498563 | 15149956  |
| 173 NA11830 | [2515685 chr5 | 5 | 155408303 | 155424017 | 15715  | 11  | -0.930481 | 0.05109  | 155405622 | 155410984 | 155420819 | 1554276!  |
| 174 NA11830 | [2515685 chr5 | 5 | 179661369 | 179664720 | 3352   | 4   | 0.41009   | 0.074378 | 179661195 | 179661544 | 179664447 | 17966499  |
| 175 NA11830 | [2515685 chr5 | 5 | 180764561 | 180820558 | 55998  | 52  | -0.265133 | 0.020656 | 180763713 | 180765409 | 180820332 | 18082078  |

|             |               |   |           |           |        |     |           |          |           |           |           |          |
|-------------|---------------|---|-----------|-----------|--------|-----|-----------|----------|-----------|-----------|-----------|----------|
| 176 NA11830 | [2515685 chr6 | 6 | 235965    | 327656    | 91692  | 105 | 0.364496  | 0.014071 | 235368    | 236563    | 326993    | 328320   |
| 177 NA11830 | [2515685 chr6 | 6 | 29954251  | 30015556  | 61306  | 53  | 0.550431  | 0.02121  | 29950833  | 29957670  | 30014305  | 30016801 |
| 178 NA11830 | [2515685 chr6 | 6 | 30051460  | 30052527  | 1068   | 3   | 0.64211   | 0.085759 | 30051232  | 30051688  | 30052363  | 30052691 |
| 179 NA11830 | [2515685 chr6 | 6 | 31158178  | 31160444  | 2267   | 3   | 0.562062  | 0.092532 | 31157997  | 31158360  | 31160125  | 31160761 |
| 180 NA11830 | [2515685 chr6 | 6 | 31344330  | 31346265  | 1936   | 4   | -0.836811 | 0.073994 | 31344063  | 31344598  | 31345931  | 31346591 |
| 181 NA11830 | [2515685 chr6 | 6 | 31365231  | 31367326  | 2096   | 2   | 1.097294  | 0.105205 | 31364305  | 31366158  | 31366773  | 31367871 |
| 182 NA11830 | [2515685 chr6 | 6 | 31378825  | 31380815  | 1991   | 2   | -1.178091 | 0.125226 | 31377784  | 31379867  | 31380220  | 31381411 |
| 183 NA11830 | [2515685 chr6 | 6 | 32058621  | 32121527  | 62907  | 76  | 0.272432  | 0.01388  | 32058317  | 32058925  | 32121053  | 32122001 |
| 184 NA11830 | [2515685 chr6 | 6 | 32561866  | 32586862  | 24997  | 6   | -0.587181 | 0.098313 | 32560230  | 32563503  | 32586127  | 32587591 |
| 185 NA11830 | [2515685 chr6 | 6 | 32589957  | 32591649  | 1693   | 3   | -0.745552 | 0.092055 | 32589338  | 32590576  | 32591403  | 32591891 |
| 186 NA11830 | [2515685 chr6 | 6 | 32605125  | 32617049  | 11925  | 9   | -0.397499 | 0.048239 | 32604923  | 32605328  | 32613543  | 32626571 |
| 187 NA11830 | [2515685 chr6 | 6 | 32653862  | 32655482  | 1621   | 3   | 0.990252  | 0.12208  | 32653679  | 32654046  | 32654980  | 32655981 |
| 188 NA11830 | [2515685 chr6 | 6 | 32666229  | 32667673  | 1445   | 3   | 0.48351   | 0.083    | 32665899  | 32666560  | 32667507  | 32667831 |
| 189 NA11830 | [2515685 chr6 | 6 | 32702716  | 32705737  | 3022   | 3   | -0.524332 | 0.071952 | 32702285  | 32703148  | 32704019  | 32707451 |
| 190 NA11830 | [2515685 chr6 | 6 | 32740139  | 32741383  | 1245   | 2   | 0.703161  | 0.099976 | 32739828  | 32740450  | 32741135  | 32741631 |
| 191 NA11830 | [2515685 chr6 | 6 | 32741849  | 32744343  | 2495   | 4   | 0.961588  | 0.084211 | 32741631  | 32742067  | 32744136  | 32744551 |
| 192 NA11830 | [2515685 chr6 | 6 | 32775535  | 32777812  | 2278   | 3   | 0.505276  | 0.093829 | 32775260  | 32775810  | 32777125  | 32778491 |
| 193 NA11830 | [2515685 chr6 | 6 | 35862833  | 35874426  | 11594  | 13  | 0.500451  | 0.040447 | 35862530  | 35863136  | 35873957  | 35874891 |
| 194 NA11830 | [2515685 chr6 | 6 | 46811029  | 46812552  | 1524   | 2   | -0.585149 | 0.111076 | 46810648  | 46811411  | 46812282  | 46812821 |
| 195 NA11830 | [2515685 chr6 | 6 | 54036900  | 54042384  | 5485   | 5   | 3.858884  | 0.156757 | 54036573  | 54037227  | 54041771  | 54042991 |
| 196 NA11830 | [2515685 chr6 | 6 | 77495034  | 77513517  | 18484  | 12  | -1.852316 | 0.068726 | 77493568  | 77496500  | 77510011  | 77517691 |
| 197 NA11830 | [2515685 chr6 | 6 | 103844685 | 103871201 | 26517  | 17  | 2.598088  | 0.07204  | 103844347 | 103845023 | 103868241 | 10387416 |
| 198 NA11830 | [2515685 chr6 | 6 | 115492959 | 115494541 | 1583   | 2   | 0.791622  | 0.122134 | 115492678 | 115493240 | 115494140 | 11549494 |
| 199 NA11830 | [2515685 chr6 | 6 | 120671191 | 120671916 | 726    | 2   | 1.383005  | 0.121129 | 120670696 | 120671686 | 120671725 | 12067210 |
| 200 NA11830 | [2515685 chr6 | 6 | 160056728 | 160058998 | 2271   | 2   | -0.977961 | 0.089791 | 160055808 | 160057648 | 160058322 | 16005967 |
| 201 NA11830 | [2515685 chr6 | 6 | 161001907 | 161038394 | 36488  | 62  | 0.334514  | 0.013064 | 161001167 | 161002648 | 161038184 | 16103860 |
| 202 NA11830 | [2515685 chr6 | 6 | 168690243 | 168696226 | 5984   | 3   | -0.797781 | 0.09363  | 168688314 | 168692173 | 168695449 | 16869700 |
| 203 NA11830 | [2515685 chr6 | 6 | 170603879 | 170604666 | 788    | 2   | -1.433225 | 0.11667  | 170603541 | 170604217 | 170604339 | 17060499 |
| 204 NA11830 | [2515685 chr6 | 6 | 170625506 | 170627028 | 1523   | 3   | 1.730412  | 0.113467 | 170625015 | 170625997 | 170626579 | 17062747 |
| 205 NA11830 | [2515685 chr6 | 6 | 170907234 | 170961212 | 53979  | 41  | -0.265525 | 0.023182 | 170906392 | 170908077 | 170909986 | 17096143 |
| 206 NA11830 | [2515685 chr7 | 7 | 1084125   | 1086660   | 2536   | 15  | 0.667581  | 0.036673 | 1083752   | 1084499   | 1085871   | 1087441  |
| 207 NA11830 | [2515685 chr7 | 7 | 3384111   | 3392461   | 8351   | 8   | 0.863223  | 0.056601 | 3383451   | 3384772   | 3390107   | 3395611  |
| 208 NA11830 | [2515685 chr7 | 7 | 7064693   | 7097525   | 32833  | 39  | -0.757644 | 0.025006 | 7064378   | 7065009   | 7095171   | 7102081  |
| 209 NA11830 | [2515685 chr7 | 7 | 38061632  | 38079290  | 17659  | 17  | 0.332541  | 0.036369 | 38061288  | 38061977  | 38078900  | 38079681 |
| 210 NA11830 | [2515685 chr7 | 7 | 43773800  | 43856045  | 82246  | 109 | 0.27059   | 0.011737 | 43773256  | 43774344  | 43853730  | 43858361 |
| 211 NA11830 | [2515685 chr7 | 7 | 56415679  | 56544240  | 128562 | 4   | -0.728445 | 0.073061 | 56286086  | 56418033  | 56542365  | 56546111 |
| 212 NA11830 | [2515685 chr7 | 7 | 62124270  | 62127972  | 3703   | 12  | -0.301817 | 0.043073 | 62124190  | 62124350  | 62127882  | 62128061 |
| 213 NA11830 | [2515685 chr7 | 7 | 62423752  | 62430522  | 6771   | 18  | -0.28655  | 0.034696 | 62423322  | 62424183  | 62429779  | 62431261 |
| 214 NA11830 | [2515685 chr7 | 7 | 62685608  | 62696382  | 10775  | 3   | 0.523283  | 0.092806 | 62685051  | 62686165  | 62694028  | 62700611 |
| 215 NA11830 | [2515685 chr7 | 7 | 64029672  | 64045487  | 15816  | 45  | -0.332498 | 0.02079  | 64029291  | 64030053  | 64045069  | 64045901 |
| 216 NA11830 | [2515685 chr7 | 7 | 64162316  | 64165981  | 3666   | 3   | 0.590357  | 0.106583 | 64160143  | 64164489  | 64165654  | 64166301 |
| 217 NA11830 | [2515685 chr7 | 7 | 64464087  | 64479903  | 15817  | 43  | -0.301174 | 0.021404 | 64463669  | 64464506  | 64479522  | 64480281 |
| 218 NA11830 | [2515685 chr7 | 7 | 64540847  | 64556662  | 15816  | 45  | -0.301285 | 0.020528 | 64540466  | 64541228  | 64556244  | 64557081 |
| 219 NA11830 | [2515685 chr7 | 7 | 66201259  | 66210587  | 9329   | 12  | -0.271775 | 0.03357  | 66200200  | 66202319  | 66210356  | 66210811 |
| 220 NA11830 | [2515685 chr7 | 7 | 69866390  | 69869623  | 3234   | 4   | 0.810975  | 0.082343 | 69865412  | 69867368  | 69869269  | 69869971 |
| 221 NA11830 | [2515685 chr7 | 7 | 69869623  | 69871056  | 1434   | 2   | 3.244396  | 0.168133 | 69869269  | 69869978  | 69870420  | 69871169 |
| 222 NA11830 | [2515685 chr7 | 7 | 71922171  | 71963082  | 40912  | 99  | -0.265155 | 0.010365 | 71921632  | 71922710  | 71962930  | 71963231 |
| 223 NA11830 | [2515685 chr7 | 7 | 73698894  | 73700080  | 1187   | 3   | 0.489005  | 0.082484 | 73698686  | 73699103  | 73699523  | 73700631 |
| 224 NA11830 | [2515685 chr7 | 7 | 73752574  | 73779576  | 27003  | 62  | -0.266682 | 0.013499 | 73752170  | 73752978  | 73778909  | 73780241 |
| 225 NA11830 | [2515685 chr7 | 7 | 73965656  | 73966691  | 1036   | 4   | 0.484058  | 0.06882  | 73965279  | 73966033  | 73966513  | 73966871 |
| 226 NA11830 | [2515685 chr7 | 7 | 74151016  | 74162376  | 11361  | 21  | -0.366058 | 0.022445 | 74150958  | 74151075  | 74160022  | 74410401 |
| 227 NA11830 | [2515685 chr7 | 7 | 74553032  | 74554821  | 1790   | 3   | -0.318856 | 0.055596 | 74551991  | 74554073  | 74554821  | 74554821 |
| 228 NA11830 | [2515685 chr7 | 7 | 74570831  | 74579322  | 8492   | 21  | -0.495436 | 0.02273  | 74570830  | 74570832  | 74578995  | 74579651 |
| 229 NA11830 | [2515685 chr7 | 7 | 74598856  | 74607347  | 8492   | 21  | -0.495436 | 0.02273  | 74598855  | 74598857  | 74607020  | 74607671 |
| 230 NA11830 | [2515685 chr7 | 7 | 74626836  | 74632023  | 5188   | 15  | -0.444342 | 0.027681 | 74626835  | 74626837  | 74631484  | 74632561 |

|             |               |   |           |           |        |     |           |          |           |           |           |           |
|-------------|---------------|---|-----------|-----------|--------|-----|-----------|----------|-----------|-----------|-----------|-----------|
| 231 NA11830 | [2515685 chr7 | 7 | 74781906  | 74789220  | 7315   | 17  | -0.304741 | 0.030883 | 74781415  | 74782398  | 74789008  | 7478943:  |
| 232 NA11830 | [2515685 chr7 | 7 | 75790452  | 75800166  | 9715   | 13  | -0.433292 | 0.034282 | 75790248  | 75790656  | 75799479  | 7580085:  |
| 233 NA11830 | [2515685 chr7 | 7 | 76281236  | 76322128  | 40893  | 83  | -0.250321 | 0.011391 | 76280775  | 76281697  | 76322070  | 7632218:  |
| 234 NA11830 | [2515685 chr7 | 7 | 76336326  | 76341574  | 5249   | 5   | 0.38351   | 0.062678 | 76336153  | 76336500  | 76339220  | 7634614:  |
| 235 NA11830 | [2515685 chr7 | 7 | 92971481  | 92976895  | 5415   | 4   | 0.93613   | 0.088356 | 92971060  | 92971903  | 92975569  | 9297822:  |
| 236 NA11830 | [2515685 chr7 | 7 | 99542714  | 99545357  | 2644   | 3   | -0.820976 | 0.063037 | 99541225  | 99544203  | 99545107  | 9954560:  |
| 237 NA11830 | [2515685 chr7 | 7 | 99979380  | 99988465  | 9086   | 2   | -0.909224 | 0.09604  | 99885388  | 99981734  | 99986334  | 9999059:  |
| 238 NA11830 | [2515685 chr7 | 7 | 101568170 | 101576590 | 8421   | 11  | -0.319406 | 0.040125 | 101566805 | 101569535 | 101575497 | 10157768: |
| 239 NA11830 | [2515685 chr7 | 7 | 101706881 | 101925433 | 218553 | 313 | 0.301826  | 0.006438 | 101690888 | 101709235 | 101924670 | 10192619: |
| 240 NA11830 | [2515685 chr7 | 7 | 104755288 | 104760673 | 5386   | 3   | 0.628479  | 0.083249 | 104754871 | 104755705 | 104760430 | 10476091: |
| 241 NA11830 | [2515685 chr7 | 7 | 109776378 | 109782655 | 6278   | 5   | 0.880656  | 0.075438 | 109775821 | 109776936 | 109782301 | 10978301: |
| 242 NA11830 | [2515685 chr7 | 7 | 110659870 | 110661626 | 1757   | 2   | -0.980214 | 0.123549 | 110659025 | 110660715 | 110661142 | 11066211: |
| 243 NA11830 | [2515685 chr7 | 7 | 115531430 | 115535130 | 3701   | 2   | -0.932922 | 0.117051 | 115523520 | 115533784 | 115534405 | 11553585: |
| 244 NA11830 | [2515685 chr7 | 7 | 125639507 | 125644775 | 5269   | 6   | -0.829995 | 0.074371 | 125639054 | 125639961 | 125644046 | 12564550: |
| 245 NA11830 | [2515685 chr7 | 7 | 126108382 | 126121632 | 13251  | 20  | -0.252479 | 0.032533 | 126107861 | 126108904 | 126121278 | 12612198: |
| 246 NA11830 | [2515685 chr7 | 7 | 133243381 | 133245202 | 1822   | 2   | 0.847164  | 0.107932 | 133243008 | 133243755 | 133244207 | 13324619: |
| 247 NA11830 | [2515685 chr7 | 7 | 133245202 | 133257363 | 12162  | 13  | 3.275612  | 0.081391 | 133244207 | 133246197 | 133255009 | 13326093: |
| 248 NA11830 | [2515685 chr7 | 7 | 141859547 | 141860812 | 1266   | 2   | -0.664497 | 0.104103 | 141859116 | 141859979 | 141860531 | 14186109: |
| 249 NA11830 | [2515685 chr7 | 7 | 142735412 | 142784994 | 49583  | 57  | 0.366426  | 0.007578 | 142734133 | 142736691 | 142784455 | 14278553: |
| 250 NA11830 | [2515685 chr7 | 7 | 142796119 | 142863185 | 67067  | 99  | 0.366426  | 0.007578 | 142795913 | 142796326 | 142862808 | 14286356: |
| 251 NA11830 | [2515685 chr7 | 7 | 142893148 | 143009302 | 116155 | 160 | 0.366426  | 0.007578 | 142892611 | 142893685 | 143009099 | 14300950: |
| 252 NA11830 | [2515685 chr7 | 7 | 143346673 | 143348067 | 1395   | 5   | -0.982756 | 0.063122 | 143346643 | 143346704 | 143347806 | 14334832: |
| 253 NA11830 | [2515685 chr7 | 7 | 143472403 | 143473797 | 1395   | 5   | -0.982753 | 0.063122 | 143472142 | 143472664 | 143473766 | 14347382: |
| 254 NA11830 | [2515685 chr7 | 7 | 152576132 | 152577404 | 1273   | 2   | -0.600062 | 0.107309 | 152575870 | 152576394 | 152577061 | 15257774: |
| 255 NA11830 | [2515685 chr7 | 7 | 158207288 | 158209880 | 2593   | 2   | 0.755666  | 0.120437 | 158206344 | 158208233 | 158209333 | 15821042: |
| 256 NA11830 | [2515685 chr7 | 7 | 158617060 | 158624382 | 7323   | 6   | 0.772006  | 0.065898 | 158616763 | 158617357 | 158622028 | 15862673: |
| 257 NA11830 | [2515685 chr8 | 8 | 13248     | 32375     | 19128  | 30  | -0.303028 | 0.026921 | 12957     | 13540     | 32228     | 32523     |
| 258 NA11830 | [2515685 chr8 | 8 | 34691     | 67656     | 32966  | 8   | -0.273847 | 0.054343 | 34286     | 35096     | 66815     | 68497     |
| 259 NA11830 | [2515685 chr8 | 8 | 3982251   | 3987764   | 5514   | 7   | -0.445972 | 0.059089 | 3982012   | 3982491   | 3987365   | 3988163:  |
| 260 NA11830 | [2515685 chr8 | 8 | 4110204   | 4112526   | 2323   | 2   | 3.946501  | 0.247653 | 4109692   | 4110717   | 4112031   | 4113022:  |
| 261 NA11830 | [2515685 chr8 | 8 | 5582875   | 5594011   | 11137  | 9   | 0.892549  | 0.04936  | 5582615   | 5583135   | 5592820   | 5595203:  |
| 262 NA11830 | [2515685 chr8 | 8 | 6817073   | 6866494   | 49422  | 86  | 0.441462  | 0.012832 | 6816809   | 6817338   | 6866269   | 6866715:  |
| 263 NA11830 | [2515685 chr8 | 8 | 7146940   | 7147455   | 516    | 2   | -0.777849 | 0.112027 | 7146660   | 7147221   | 7147239   | 7147677:  |
| 264 NA11830 | [2515685 chr8 | 8 | 7153787   | 7154559   | 773    | 2   | -0.792989 | 0.095656 | 7153650   | 7153924   | 7154347   | 7154772:  |
| 265 NA11830 | [2515685 chr8 | 8 | 7161736   | 7162569   | 834    | 2   | -0.627885 | 0.112868 | 7161411   | 7162062   | 7162560   | 7162578:  |
| 266 NA11830 | [2515685 chr8 | 8 | 7176337   | 7187950   | 11614  | 33  | 0.778225  | 0.026469 | 7176045   | 7176630   | 7187698   | 7188202:  |
| 267 NA11830 | [2515685 chr8 | 8 | 7199257   | 7207633   | 8377   | 14  | -0.362527 | 0.037057 | 7198986   | 7199528   | 7207477   | 7207785:  |
| 268 NA11830 | [2515685 chr8 | 8 | 7845659   | 7846400   | 742    | 2   | 0.521241  | 0.089078 | 7845518   | 7845800   | 7845814   | 7846986:  |
| 269 NA11830 | [2515685 chr8 | 8 | 7862281   | 7873897   | 11617  | 34  | 0.780602  | 0.025488 | 7862030   | 7862533   | 7873605   | 7874190:  |
| 270 NA11830 | [2515685 chr8 | 8 | 7887656   | 7888490   | 835    | 2   | -0.627884 | 0.112868 | 7887647   | 7887665   | 7888163   | 7888818:  |
| 271 NA11830 | [2515685 chr8 | 8 | 7902515   | 7903287   | 773    | 2   | -0.777848 | 0.112027 | 7902043   | 7902988   | 7903006   | 7903568:  |
| 272 NA11830 | [2515685 chr8 | 8 | 12006412  | 12007153  | 742    | 2   | 0.521241  | 0.089078 | 12006271  | 12006553  | 12006567  | 1200773:  |
| 273 NA11830 | [2515685 chr8 | 8 | 12023134  | 12035286  | 12153  | 33  | 0.804583  | 0.026781 | 12022997  | 12023272  | 12034973  | 1203559:  |
| 274 NA11830 | [2515685 chr8 | 8 | 12259618  | 12260238  | 621    | 2   | 0.521241  | 0.089078 | 12259477  | 12259759  | 12259773  | 1226070:  |
| 275 NA11830 | [2515685 chr8 | 8 | 12276602  | 12284041  | 7440   | 14  | 0.754876  | 0.038038 | 12276206  | 12276998  | 12283622  | 1228446:  |
| 276 NA11830 | [2515685 chr8 | 8 | 13616781  | 13617957  | 1177   | 2   | 0.749572  | 0.134126 | 13616575  | 13616988  | 13617472  | 1361844:  |
| 277 NA11830 | [2515685 chr8 | 8 | 16776888  | 16781671  | 4784   | 3   | -0.90836  | 0.081661 | 16772970  | 16779647  | 16781308  | 1678203:  |
| 278 NA11830 | [2515685 chr8 | 8 | 18900549  | 18901909  | 1361   | 2   | -0.786402 | 0.103398 | 18900138  | 18900960  | 18901577  | 1890224:  |
| 279 NA11830 | [2515685 chr8 | 8 | 20022286  | 20024771  | 2486   | 2   | -0.656144 | 0.114354 | 20021082  | 20023491  | 20024338  | 2002520:  |
| 280 NA11830 | [2515685 chr8 | 8 | 20630162  | 20652580  | 22419  | 17  | -0.256359 | 0.038234 | 20629908  | 20630416  | 20652191  | 2065297:  |
| 281 NA11830 | [2515685 chr8 | 8 | 39405846  | 39409044  | 3199   | 2   | -0.708408 | 0.138352 | 39405665  | 39406028  | 39406285  | 3941870:  |
| 282 NA11830 | [2515685 chr8 | 8 | 51193670  | 51201152  | 7483   | 11  | -0.96716  | 0.050386 | 51193335  | 51194005  | 51200867  | 5120143:  |
| 283 NA11830 | [2515685 chr8 | 8 | 54001807  | 54002677  | 871    | 2   | -1.056283 | 0.119593 | 54001673  | 54001942  | 54002470  | 5400288:  |
| 284 NA11830 | [2515685 chr8 | 8 | 58278355  | 58291327  | 12973  | 11  | 0.689945  | 0.038079 | 58277116  | 58279595  | 58290731  | 5829192:  |
| 285 NA11830 | [2515685 chr8 | 8 | 72377031  | 72380286  | 3256   | 3   | -2.692619 | 0.128999 | 72376214  | 72377848  | 72379847  | 7238072:  |

|             |                |    |           |           |        |     |           |          |           |           |           |           |
|-------------|----------------|----|-----------|-----------|--------|-----|-----------|----------|-----------|-----------|-----------|-----------|
| 286 NA11830 | [2515685 chr8  | 8  | 85423649  | 85431920  | 8272   | 7   | 0.864481  | 0.058096 | 85423043  | 85424256  | 85431347  | 8543249:  |
| 287 NA11830 | [2515685 chr8  | 8  | 86742169  | 86910255  | 168087 | 105 | 0.366743  | 0.010706 | 86741757  | 86742581  | 86910002  | 8691050:  |
| 288 NA11830 | [2515685 chr8  | 8  | 114800642 | 114807739 | 7098   | 5   | -0.327498 | 0.063831 | 114800095 | 114801190 | 114807479 | 11480799: |
| 289 NA11830 | [2515685 chr8  | 8  | 115703942 | 115715322 | 11381  | 11  | -0.911741 | 0.049975 | 115703065 | 115704820 | 115712563 | 11571874: |
| 290 NA11830 | [2515685 chr8  | 8  | 120222655 | 120229952 | 7298   | 6   | 0.757775  | 0.062837 | 120218251 | 120225414 | 120229434 | 12023047: |
| 291 NA11830 | [2515685 chr9  | 9  | 6212297   | 6222686   | 1390   | 2   | 0.779124  | 0.116104 | 621069    | 621526    | 622289    | 623084:   |
| 292 NA11830 | [2515685 chr9  | 9  | 38849874  | 38864486  | 14613  | 17  | -0.259305 | 0.034084 | 38849774  | 38849975  | 38864433  | 3886453:  |
| 293 NA11830 | [2515685 chr9  | 9  | 39272319  | 39273300  | 982    | 3   | -0.316261 | 0.063245 | 39272114  | 39272524  | 39273050  | 3927355:  |
| 294 NA11830 | [2515685 chr9  | 9  | 40205426  | 40360534  | 155109 | 316 | -0.26841  | 0.007564 | 40205146  | 40205707  | 40360153  | 4036091:  |
| 295 NA11830 | [2515685 chr9  | 9  | 41234952  | 41249563  | 14612  | 14  | -0.259619 | 0.0381   | 41234900  | 41235005  | 41249466  | 4124966:  |
| 296 NA11830 | [2515685 chr9  | 9  | 42645007  | 42646038  | 1032   | 2   | -0.646952 | 0.080322 | 42644851  | 42645163  | 42645769  | 4264630:  |
| 297 NA11830 | [2515685 chr9  | 9  | 42669198  | 42670938  | 1741   | 2   | -0.711585 | 0.068091 | 42668921  | 42669475  | 42670652  | 4267122:  |
| 298 NA11830 | [2515685 chr9  | 9  | 42754727  | 42756705  | 1979   | 3   | -0.377814 | 0.064409 | 42754385  | 42755070  | 42755767  | 4275764:  |
| 299 NA11830 | [2515685 chr9  | 9  | 42789875  | 42791615  | 1741   | 2   | -0.711585 | 0.068091 | 42789598  | 42790152  | 42791329  | 4279190:  |
| 300 NA11830 | [2515685 chr9  | 9  | 42875403  | 42877381  | 1979   | 3   | -0.377814 | 0.064409 | 42875061  | 42875746  | 42876443  | 4287832:  |
| 301 NA11830 | [2515685 chr9  | 9  | 43056538  | 43062338  | 5801   | 8   | -0.310242 | 0.049353 | 43056534  | 43056542  | 43062265  | 4306241:  |
| 302 NA11830 | [2515685 chr9  | 9  | 43065211  | 43066832  | 1622   | 2   | -0.991835 | 0.105329 | 43064261  | 43066162  | 43066646  | 4306701:  |
| 303 NA11830 | [2515685 chr9  | 9  | 43097020  | 43213436  | 116417 | 252 | -0.265152 | 0.008392 | 43096964  | 43097077  | 43213301  | 4321357:  |
| 304 NA11830 | [2515685 chr9  | 9  | 43441558  | 43444062  | 2505   | 7   | -0.311627 | 0.048886 | 43441276  | 43441841  | 43443734  | 4344439:  |
| 305 NA11830 | [2515685 chr9  | 9  | 43505998  | 43508499  | 2502   | 8   | -0.316912 | 0.046239 | 43505670  | 43506327  | 43508216  | 4350878:  |
| 306 NA11830 | [2515685 chr9  | 9  | 43720039  | 43721070  | 1032   | 2   | -0.646952 | 0.080322 | 43719883  | 43720195  | 43720801  | 4372133:  |
| 307 NA11830 | [2515685 chr9  | 9  | 43744237  | 43745976  | 1740   | 2   | -0.711585 | 0.068091 | 43743960  | 43744514  | 43745690  | 4374626:  |
| 308 NA11830 | [2515685 chr9  | 9  | 43941080  | 43943985  | 2906   | 8   | 0.37843   | 0.049769 | 43940774  | 43941386  | 43943754  | 4394421:  |
| 309 NA11830 | [2515685 chr9  | 9  | 44679085  | 44682053  | 2969   | 6   | 0.387723  | 0.057333 | 44678768  | 44679402  | 44681477  | 4468262:  |
| 310 NA11830 | [2515685 chr9  | 9  | 44927718  | 44930690  | 2973   | 6   | 0.422019  | 0.059947 | 44927142  | 44928294  | 44930373  | 4493100:  |
| 311 NA11830 | [2515685 chr9  | 9  | 66047392  | 66062001  | 14610  | 15  | -0.265442 | 0.037803 | 66047340  | 66047445  | 66061902  | 6606210:  |
| 312 NA11830 | [2515685 chr9  | 9  | 69247738  | 69255030  | 7293   | 3   | 0.378306  | 0.071407 | 69247278  | 69248198  | 69254771  | 6925529:  |
| 313 NA11830 | [2515685 chr9  | 9  | 112902065 | 112932269 | 30205  | 42  | 0.438334  | 0.016415 | 112901557 | 112902574 | 112931621 | 1129329:  |
| 314 NA11830 | [2515685 chr9  | 9  | 131289414 | 131293919 | 4506   | 2   | -0.836102 | 0.110947 | 131287281 | 131291547 | 131292523 | 1312953:  |
| 315 NA11830 | [2515685 chr9  | 9  | 135438411 | 135444067 | 5657   | 2   | 3.726506  | 0.185695 | 135383632 | 135440781 | 135443016 | 1354451:  |
| 316 NA11830 | [2515685 chr10 | 10 | 170571    | 172369    | 1799   | 2   | 0.634434  | 0.093025 | 170341    | 170801    | 171237    | 173501    |
| 317 NA11830 | [2515685 chr10 | 10 | 6693908   | 6703893   | 9986   | 8   | 0.841881  | 0.057267 | 6692231   | 6695585   | 6703779   | 6704008   |
| 318 NA11830 | [2515685 chr10 | 10 | 19786434  | 19791314  | 4881   | 6   | -0.317155 | 0.056667 | 19786013  | 19786856  | 19790970  | 1979165:  |
| 319 NA11830 | [2515685 chr10 | 10 | 20036833  | 20038315  | 1483   | 2   | -0.845295 | 0.115742 | 20036464  | 20037202  | 20038007  | 2003862:  |
| 320 NA11830 | [2515685 chr10 | 10 | 37483833  | 37484967  | 1135   | 2   | -0.463856 | 0.08628  | 37483539  | 37484127  | 37484579  | 3748535:  |
| 321 NA11830 | [2515685 chr10 | 10 | 37487278  | 37529195  | 41918  | 64  | -0.573682 | 0.014947 | 37486985  | 37487572  | 37528890  | 3752950:  |
| 322 NA11830 | [2515685 chr10 | 10 | 46107579  | 46132961  | 25383  | 41  | -0.38199  | 0.018204 | 46104113  | 46110327  | 46132792  | 4613313:  |
| 323 NA11830 | [2515685 chr10 | 10 | 46168755  | 46170845  | 2091   | 9   | -0.476238 | 0.04352  | 46168488  | 46169022  | 46170704  | 4617098:  |
| 324 NA11830 | [2515685 chr10 | 10 | 46185144  | 46192298  | 7155   | 17  | -0.382906 | 0.029539 | 46184361  | 46185928  | 46192107  | 4619249:  |
| 325 NA11830 | [2515685 chr10 | 10 | 46198107  | 46199907  | 1801   | 4   | -0.553049 | 0.064366 | 46197622  | 46198592  | 46199657  | 4620015:  |
| 326 NA11830 | [2515685 chr10 | 10 | 46216214  | 46221325  | 5112   | 19  | -0.360365 | 0.028526 | 46215871  | 46216557  | 46221069  | 4622158:  |
| 327 NA11830 | [2515685 chr10 | 10 | 46230274  | 46381170  | 150897 | 249 | -0.330756 | 0.003444 | 46230243  | 46230306  | 46381004  | 4638133:  |
| 328 NA11830 | [2515685 chr10 | 10 | 46385672  | 46584531  | 198860 | 248 | -0.330756 | 0.003444 | 46385485  | 46385859  | 46584403  | 4658465:  |
| 329 NA11830 | [2515685 chr10 | 10 | 46585934  | 46600786  | 14853  | 43  | -0.330756 | 0.003444 | 46585739  | 46586129  | 46600776  | 4660079:  |
| 330 NA11830 | [2515685 chr10 | 10 | 46610029  | 46643240  | 33212  | 98  | -0.330756 | 0.003444 | 46609739  | 46610319  | 46643136  | 4664334:  |
| 331 NA11830 | [2515685 chr10 | 10 | 46645411  | 46675076  | 29666  | 107 | -0.330756 | 0.003444 | 46645296  | 46645526  | 46675054  | 4667509:  |
| 332 NA11830 | [2515685 chr10 | 10 | 46677788  | 46709799  | 32012  | 67  | -0.330756 | 0.003444 | 46677220  | 46678357  | 46709792  | 4670980:  |
| 333 NA11830 | [2515685 chr10 | 10 | 46711086  | 47107819  | 396734 | 376 | -0.330756 | 0.003444 | 46711055  | 46711118  | 47107535  | 4710810:  |
| 334 NA11830 | [2515685 chr10 | 10 | 47112204  | 47173707  | 61504  | 93  | -0.330756 | 0.003444 | 47112009  | 47112400  | 47173507  | 4717390:  |
| 335 NA11830 | [2515685 chr10 | 10 | 47219668  | 47221310  | 1643   | 9   | -0.358348 | 0.046391 | 47219445  | 47219892  | 47221226  | 4722139:  |
| 336 NA11830 | [2515685 chr10 | 10 | 47227413  | 47227763  | 351    | 2   | -0.546257 | 0.082782 | 47227267  | 47227560  | 47227636  | 4722789:  |
| 337 NA11830 | [2515685 chr10 | 10 | 47230731  | 47231502  | 772    | 2   | -0.648971 | 0.082428 | 47230574  | 47230889  | 47231201  | 4723180:  |
| 338 NA11830 | [2515685 chr10 | 10 | 47723234  | 47758287  | 35054  | 106 | -0.396965 | 0.011882 | 47757187  | 47752598  | 47758256  | 4775831:  |
| 339 NA11830 | [2515685 chr10 | 10 | 47767237  | 47772343  | 5107   | 20  | -0.357651 | 0.028073 | 47766982  | 47767493  | 47772001  | 4777268:  |
| 340 NA11830 | [2515685 chr10 | 10 | 47788657  | 47790566  | 1910   | 4   | -0.558545 | 0.064125 | 47788408  | 47788907  | 47790187  | 4779094:  |



|             |                |    |           |           |        |     |           |          |           |           |           |          |
|-------------|----------------|----|-----------|-----------|--------|-----|-----------|----------|-----------|-----------|-----------|----------|
| 341 NA11830 | [2515685 chr10 | 10 | 47796766  | 47803532  | 6767   | 22  | -0.43789  | 0.027709 | 47796723  | 47796810  | 47802824  | 4780424  |
| 342 NA11830 | [2515685 chr10 | 10 | 47817871  | 47820294  | 2424   | 8   | -0.440045 | 0.050572 | 47817785  | 47817958  | 47820036  | 4782055  |
| 343 NA11830 | [2515685 chr10 | 10 | 47885738  | 47886088  | 351    | 2   | -0.546257 | 0.082782 | 47885592  | 47885885  | 47885961  | 4788621  |
| 344 NA11830 | [2515685 chr10 | 10 | 47889059  | 47889830  | 772    | 2   | -0.648971 | 0.082428 | 47888902  | 47889217  | 47889529  | 4789013  |
| 345 NA11830 | [2515685 chr10 | 10 | 48494492  | 48516837  | 22346  | 31  | -0.375508 | 0.020598 | 48491014  | 48497240  | 48516285  | 4851739  |
| 346 NA11830 | [2515685 chr10 | 10 | 48558524  | 48560613  | 2090   | 10  | -0.441765 | 0.04172  | 48558257  | 48558791  | 48560472  | 4856075  |
| 347 NA11830 | [2515685 chr10 | 10 | 48574881  | 48597048  | 22168  | 54  | -0.319232 | 0.016441 | 48574098  | 48575665  | 48594300  | 4860023  |
| 348 NA11830 | [2515685 chr10 | 10 | 48606762  | 48611077  | 4316   | 15  | -0.356442 | 0.032033 | 48606702  | 48606822  | 48610821  | 4861133  |
| 349 NA11830 | [2515685 chr10 | 10 | 48620019  | 48865591  | 245573 | 176 | -0.3758   | 0.008329 | 48619988  | 48620051  | 48865564  | 4886561  |
| 350 NA11830 | [2515685 chr10 | 10 | 48925221  | 48927636  | 2416   | 10  | -0.448813 | 0.043245 | 48924954  | 48925488  | 48927550  | 4892772  |
| 351 NA11830 | [2515685 chr10 | 10 | 51120710  | 51129602  | 8893   | 11  | -0.429413 | 0.034606 | 51120483  | 51120937  | 51128757  | 5113044  |
| 352 NA11830 | [2515685 chr10 | 10 | 55013473  | 55030874  | 17402  | 11  | 0.276464  | 0.047491 | 55011568  | 55015379  | 55030462  | 5503128  |
| 353 NA11830 | [2515685 chr10 | 10 | 55592758  | 55692072  | 99315  | 4   | -0.377994 | 0.061073 | 55473112  | 55595506  | 55691526  | 5569261  |
| 354 NA11830 | [2515685 chr10 | 10 | 56117212  | 56139275  | 22064  | 20  | -1.041099 | 0.035693 | 56115764  | 56118661  | 56138931  | 5613961  |
| 355 NA11830 | [2515685 chr10 | 10 | 66977355  | 66985193  | 7839   | 8   | -0.950574 | 0.06078  | 66976803  | 66977908  | 66984894  | 6698549  |
| 356 NA11830 | [2515685 chr10 | 10 | 78842318  | 78844154  | 1837   | 2   | 0.587601  | 0.112279 | 78841676  | 78842960  | 78843551  | 7884475  |
| 357 NA11830 | [2515685 chr10 | 10 | 81084332  | 81103025  | 18694  | 29  | -0.309818 | 0.02419  | 81084016  | 81084649  | 81102919  | 8110313  |
| 358 NA11830 | [2515685 chr10 | 10 | 81214834  | 81230980  | 16147  | 23  | -0.293165 | 0.026129 | 81214569  | 81215099  | 81230920  | 8123104  |
| 359 NA11830 | [2515685 chr10 | 10 | 81405284  | 81418025  | 12742  | 18  | -0.362459 | 0.029137 | 81405073  | 81405496  | 81417780  | 8141827  |
| 360 NA11830 | [2515685 chr10 | 10 | 81534994  | 81588775  | 53782  | 78  | -0.302294 | 0.015047 | 81534707  | 81535281  | 81588507  | 8158904  |
| 361 NA11830 | [2515685 chr10 | 10 | 81663989  | 81669493  | 5505   | 8   | -0.327811 | 0.050131 | 81663740  | 81664238  | 81669128  | 8166985  |
| 362 NA11830 | [2515685 chr10 | 10 | 82706016  | 82767821  | 61806  | 2   | -0.502752 | 0.086505 | 82607171  | 82708764  | 82765073  | 8285048  |
| 363 NA11830 | [2515685 chr10 | 10 | 88867421  | 88948595  | 81175  | 92  | -0.377921 | 0.013497 | 88867217  | 88867626  | 88948288  | 8894890  |
| 364 NA11830 | [2515685 chr10 | 10 | 89056763  | 89104175  | 47413  | 72  | -0.349255 | 0.015656 | 89056683  | 89056843  | 89103532  | 8910481  |
| 365 NA11830 | [2515685 chr10 | 10 | 89153788  | 89180666  | 26879  | 45  | -0.330302 | 0.019624 | 89150578  | 89156536  | 89180586  | 8918074  |
| 366 NA11830 | [2515685 chr10 | 10 | 124336365 | 124341749 | 5385   | 6   | 0.68109   | 0.06623  | 124335581 | 124337149 | 124341238 | 12434226 |
| 367 NA11830 | [2515685 chr10 | 10 | 124350353 | 124366738 | 16386  | 21  | -0.31224  | 0.022621 | 124350031 | 124350675 | 124366300 | 12436717 |
| 368 NA11830 | [2515685 chr10 | 10 | 127564343 | 127582849 | 18507  | 17  | -0.308791 | 0.03643  | 127563306 | 127565381 | 127581533 | 12758416 |
| 369 NA11830 | [2515685 chr10 | 10 | 134168766 | 134170259 | 1494   | 17  | -0.784126 | 0.039367 | 134168524 | 134169008 | 134170097 | 13417042 |
| 370 NA11830 | [2515685 chr10 | 10 | 135178359 | 135183528 | 5170   | 24  | -0.372896 | 0.019908 | 135177799 | 135178919 | 135183320 | 13518373 |
| 371 NA11830 | [2515685 chr11 | 11 | 2839485   | 2848945   | 9461   | 11  | 0.260463  | 0.041703 | 2839011   | 2839959   | 2848635   | 284925   |
| 372 NA11830 | [2515685 chr11 | 11 | 3222426   | 3316109   | 93684  | 105 | 0.384509  | 0.01092  | 3213200   | 3225514   | 3315778   | 331644   |
| 373 NA11830 | [2515685 chr11 | 11 | 3628748   | 3632795   | 4048   | 6   | -0.583715 | 0.060359 | 3625722   | 3631775   | 3632594   | 363299   |
| 374 NA11830 | [2515685 chr11 | 11 | 4924831   | 4932599   | 7769   | 8   | -0.944328 | 0.053237 | 4924403   | 4925260   | 4931948   | 493325   |
| 375 NA11830 | [2515685 chr11 | 11 | 5717038   | 5722033   | 4996   | 3   | 2.501812  | 0.136223 | 5716660   | 5717416   | 5718945   | 572548   |
| 376 NA11830 | [2515685 chr11 | 11 | 5741269   | 5765993   | 24725  | 32  | 2.783299  | 0.045698 | 5741059   | 5741480   | 5765632   | 576635   |
| 377 NA11830 | [2515685 chr11 | 11 | 5799500   | 5800609   | 1110   | 2   | -0.545971 | 0.106235 | 5799315   | 5799686   | 5800277   | 580094   |
| 378 NA11830 | [2515685 chr11 | 11 | 11831868  | 11833089  | 1222   | 2   | 0.868128  | 0.106326 | 11831412  | 11832324  | 11832853  | 1183332  |
| 379 NA11830 | [2515685 chr11 | 11 | 18903445  | 18923027  | 19583  | 30  | 0.9908    | 0.028433 | 18897800  | 18906533  | 18919939  | 1892845  |
| 380 NA11830 | [2515685 chr11 | 11 | 48284073  | 48284771  | 699    | 2   | 0.958239  | 0.107794 | 48283862  | 48284285  | 48284572  | 4828497  |
| 381 NA11830 | [2515685 chr11 | 11 | 49665830  | 49715836  | 50007  | 35  | 0.460424  | 0.024609 | 49665251  | 49666410  | 49712748  | 4972198  |
| 382 NA11830 | [2515685 chr11 | 11 | 50233802  | 50235333  | 1532   | 3   | -0.392653 | 0.061085 | 50233483  | 50234121  | 50234922  | 5023574  |
| 383 NA11830 | [2515685 chr11 | 11 | 54977173  | 54979405  | 2233   | 2   | -0.464049 | 0.087907 | 54976212  | 54978135  | 54979178  | 5497963  |
| 384 NA11830 | [2515685 chr11 | 11 | 60721034  | 60777477  | 56444  | 73  | 0.576052  | 0.013673 | 60720112  | 60721956  | 60776810  | 6077814  |
| 385 NA11830 | [2515685 chr11 | 11 | 73815147  | 73818580  | 3434   | 3   | -0.505768 | 0.092179 | 73812981  | 73817313  | 73818213  | 7381894  |
| 386 NA11830 | [2515685 chr11 | 11 | 89260757  | 89266247  | 5491   | 9   | -0.613375 | 0.050703 | 89260437  | 89261077  | 89265993  | 8926650  |
| 387 NA11830 | [2515685 chr11 | 11 | 89323920  | 89327673  | 3754   | 8   | -0.67507  | 0.054155 | 89323666  | 89324175  | 89327396  | 8932795  |
| 388 NA11830 | [2515685 chr11 | 11 | 106744846 | 106746569 | 1724   | 5   | -0.962301 | 0.074349 | 106744561 | 106745131 | 106746367 | 10674677 |
| 389 NA11830 | [2515685 chr11 | 11 | 106747019 | 106751059 | 4041   | 3   | -0.757945 | 0.097399 | 106746772 | 106747267 | 106747971 | 10675483 |
| 390 NA11830 | [2515685 chr11 | 11 | 134107699 | 134112290 | 4592   | 5   | 0.892916  | 0.069599 | 134106591 | 134108808 | 134111845 | 13411273 |
| 391 NA11830 | [2515685 chr12 | 12 | 31670     | 46229     | 14560  | 2   | -0.564857 | 0.103134 | 29463     | 33878     | 45710     | 46748    |
| 392 NA11830 | [2515685 chr12 | 12 | 736840    | 744802    | 7963   | 9   | 0.891245  | 0.051597 | 736616    | 737064    | 744211    | 74539    |
| 393 NA11830 | [2515685 chr12 | 12 | 6113530   | 6118188   | 4659   | 4   | 0.691716  | 0.082574 | 6111640   | 6115421   | 6117816   | 611856   |
| 394 NA11830 | [2515685 chr12 | 12 | 9439347   | 9445623   | 6277   | 10  | 0.46869   | 0.043628 | 9439120   | 9439574   | 9445247   | 944600   |
| 395 NA11830 | [2515685 chr12 | 12 | 9524239   | 9624971   | 100733 | 108 | 1.061029  | 0.016334 | 9523968   | 9524510   | 9623223   | 962672   |

|             |                |    |           |           |        |      |           |          |           |           |           |           |
|-------------|----------------|----|-----------|-----------|--------|------|-----------|----------|-----------|-----------|-----------|-----------|
| 396 NA11830 | [2515685 chr12 | 12 | 9815284   | 9817019   | 1736   | 2    | -0.513264 | 0.099167 | 9814952   | 9815616   | 9816451   | 9817587   |
| 397 NA11830 | [2515685 chr12 | 12 | 11060019  | 11069113  | 9095   | 11   | -0.307264 | 0.044693 | 11059499  | 11060539  | 11068793  | 1106943:  |
| 398 NA11830 | [2515685 chr12 | 12 | 11070849  | 11142012  | 71164  | 86   | -0.547945 | 0.016292 | 11069857  | 11071841  | 11141608  | 11142417  |
| 399 NA11830 | [2515685 chr12 | 12 | 11398049  | 11436142  | 38094  | 34   | -0.408498 | 0.025262 | 11397507  | 11398591  | 11435669  | 1143661!  |
| 400 NA11830 | [2515685 chr12 | 12 | 30128711  | 30133561  | 4851   | 3    | -1.021857 | 0.089191 | 30128382  | 30129041  | 30132177  | 3013494!  |
| 401 NA11830 | [2515685 chr12 | 12 | 31155331  | 31244780  | 89450  | 84   | 0.691914  | 0.01673  | 31155092  | 31155571  | 31244217  | 3124534:  |
| 402 NA11830 | [2515685 chr12 | 12 | 36886168  | 36890395  | 4228   | 5    | -0.398203 | 0.063602 | 36886078  | 36886259  | 36887282  | 3689350!  |
| 403 NA11830 | [2515685 chr12 | 12 | 46994634  | 46995975  | 1342   | 2    | -0.801493 | 0.122585 | 46994358  | 46994911  | 46995667  | 4699628:  |
| 404 NA11830 | [2515685 chr12 | 12 | 78656134  | 78665261  | 9128   | 9    | -0.611583 | 0.050891 | 78654687  | 78657582  | 78664736  | 7866578:  |
| 405 NA11830 | [2515685 chr12 | 12 | 127754996 | 127757890 | 2895   | 4    | -0.840543 | 0.070338 | 127754773 | 127755219 | 127757355 | 12775842  |
| 406 NA11830 | [2515685 chr12 | 12 | 130257877 | 130259876 | 2000   | 3    | -0.557743 | 0.076689 | 130257493 | 130258262 | 130259649 | 13026010  |
| 407 NA11830 | [2515685 chr12 | 12 | 130315291 | 130321241 | 5951   | 19   | 0.271806  | 0.03173  | 130315089 | 130315493 | 130320997 | 13032148  |
| 408 NA11830 | [2515685 chr12 | 12 | 130798727 | 130802870 | 4144   | 5    | -0.790524 | 0.064719 | 130798268 | 130799187 | 130801345 | 13080439  |
| 409 NA11830 | [2515685 chr13 | 13 | 18073365  | 18078331  | 4967   | 4    | -0.499457 | 0.072959 | 18073177  | 18073554  | 18075591  | 1808107:  |
| 410 NA11830 | [2515685 chr13 | 13 | 25947233  | 25950398  | 3166   | 3    | 3.385077  | 0.159009 | 25946194  | 25948272  | 25949415  | 2595138:  |
| 411 NA11830 | [2515685 chr13 | 13 | 33029562  | 33042392  | 12831  | 8    | 0.88558   | 0.058319 | 33000262  | 33034253  | 33041860  | 3304292!  |
| 412 NA11830 | [2515685 chr13 | 13 | 36971484  | 36983475  | 11992  | 10   | -3.494891 | 0.095972 | 36969416  | 36973552  | 36982905  | 3698404!  |
| 413 NA11830 | [2515685 chr13 | 13 | 56611711  | 56645734  | 34024  | 42   | 0.722859  | 0.015173 | 56610946  | 56612477  | 56645321  | 5664614:  |
| 414 NA11830 | [2515685 chr13 | 13 | 69633905  | 69673289  | 39385  | 42   | 0.784571  | 0.023846 | 69633412  | 69634399  | 69672985  | 6967359:  |
| 415 NA11830 | [2515685 chr13 | 13 | 71375850  | 71378291  | 2442   | 2    | -1.057985 | 0.13608  | 71374967  | 71376734  | 71377584  | 7137899!  |
| 416 NA11830 | [2515685 chr13 | 13 | 110502383 | 110503129 | 747    | 3    | -1.043378 | 0.104348 | 110502225 | 110502541 | 110502890 | 11050336  |
| 417 NA11830 | [2515685 chr13 | 13 | 112713598 | 112719112 | 5515   | 7    | -0.305748 | 0.054165 | 112713274 | 112713922 | 112718845 | 11271938: |
| 418 NA11830 | [2515685 chr13 | 13 | 113079647 | 113086829 | 7183   | 3    | 0.755549  | 0.08237  | 113078890 | 113080404 | 113082138 | 11309434  |
| 419 NA11830 | [2515685 chr14 | 14 | 18439491  | 19143339  | 703849 | 1183 | -0.276161 | 0.00352  | 18437497  | 18441485  | 19143095  | 1914358:  |
| 420 NA11830 | [2515685 chr14 | 14 | 19145876  | 19174829  | 28954  | 50   | -0.276161 | 0.00352  | 19145143  | 19146610  | 19174593  | 1917506!  |
| 421 NA11830 | [2515685 chr14 | 14 | 19177839  | 19351102  | 173264 | 211  | -0.276161 | 0.00352  | 19177094  | 19178584  | 19350905  | 1935129:  |
| 422 NA11830 | [2515685 chr14 | 14 | 19619343  | 19625484  | 6142   | 3    | 4.234914  | 0.220921 | 19612261  | 19624114  | 19625018  | 1962595!  |
| 423 NA11830 | [2515685 chr14 | 14 | 42059344  | 42062997  | 3654   | 2    | 0.757718  | 0.115128 | 42056485  | 42062203  | 42062601  | 4206339:  |
| 424 NA11830 | [2515685 chr14 | 14 | 47365852  | 47374040  | 8189   | 13   | -0.270245 | 0.043612 | 47365228  | 47366476  | 47373875  | 4737420!  |
| 425 NA11830 | [2515685 chr14 | 14 | 53780053  | 53782988  | 2936   | 5    | -4.156189 | 0.157806 | 53779833  | 53780274  | 53782739  | 5378323!  |
| 426 NA11830 | [2515685 chr14 | 14 | 73063171  | 73119729  | 56559  | 51   | 0.460771  | 0.020283 | 73061866  | 73064476  | 73118276  | 7312118:  |
| 427 NA11830 | [2515685 chr14 | 14 | 85355318  | 85383570  | 28253  | 27   | -0.923722 | 0.031416 | 85355002  | 85355635  | 85382242  | 8538489!  |
| 428 NA11830 | [2515685 chr14 | 14 | 86402641  | 86404796  | 2156   | 3    | -0.411096 | 0.079097 | 86402159  | 86403123  | 86404584  | 8640500!  |
| 429 NA11830 | [2515685 chr14 | 14 | 104766812 | 104778505 | 11694  | 145  | -0.389959 | 0.009694 | 104766457 | 104767167 | 104778286 | 10477872: |
| 430 NA11830 | [2515685 chr15 | 15 | 18431549  | 18474798  | 43250  | 46   | -0.313984 | 0.003117 | 18431298  | 18431801  | 18474541  | 1847505!  |
| 431 NA11830 | [2515685 chr15 | 15 | 18478130  | 19218887  | 740758 | 996  | -0.313984 | 0.003117 | 18477634  | 18478626  | 19218462  | 1921931:  |
| 432 NA11830 | [2515685 chr15 | 15 | 19227062  | 19805080  | 578019 | 575  | -0.313984 | 0.003117 | 19226891  | 19227233  | 19804866  | 1980529:  |
| 433 NA11830 | [2515685 chr15 | 15 | 19874194  | 19979697  | 105504 | 96   | -0.313984 | 0.003117 | 19873671  | 19874718  | 19977511  | 1998188:  |
| 434 NA11830 | [2515685 chr15 | 15 | 20228094  | 20234328  | 6235   | 12   | 0.562881  | 0.037925 | 20226486  | 20229703  | 20233781  | 2023487!  |
| 435 NA11830 | [2515685 chr15 | 15 | 20371607  | 20383831  | 12225  | 17   | -0.396541 | 0.031275 | 20367922  | 20373912  | 20383079  | 2038458:  |
| 436 NA11830 | [2515685 chr15 | 15 | 20864600  | 20865501  | 902    | 3    | -0.583662 | 0.089692 | 20864385  | 20864815  | 20865204  | 2086579!  |
| 437 NA11830 | [2515685 chr15 | 15 | 20890484  | 20934983  | 44500  | 75   | -0.312406 | 0.014606 | 20890334  | 20890635  | 20934915  | 2093505:  |
| 438 NA11830 | [2515685 chr15 | 15 | 21009585  | 21015599  | 6015   | 4    | -0.710486 | 0.058947 | 21006900  | 21011890  | 21015285  | 2101591:  |
| 439 NA11830 | [2515685 chr15 | 15 | 21023419  | 21034291  | 10873  | 4    | -0.685312 | 0.063488 | 21023214  | 21023625  | 21033788  | 2103479:  |
| 440 NA11830 | [2515685 chr15 | 15 | 21042508  | 21043975  | 1468   | 3    | -0.708665 | 0.085696 | 21042181  | 21042836  | 21043230  | 2104472!  |
| 441 NA11830 | [2515685 chr15 | 15 | 21046939  | 21048661  | 1723   | 3    | -0.617696 | 0.080311 | 21046484  | 21047394  | 21048447  | 2104887!  |
| 442 NA11830 | [2515685 chr15 | 15 | 21049779  | 21062197  | 12419  | 11   | -0.66879  | 0.040875 | 21049217  | 21050342  | 21061995  | 2106240!  |
| 443 NA11830 | [2515685 chr15 | 15 | 21062696  | 21068074  | 5379   | 6    | -0.514482 | 0.046888 | 21062400  | 21062992  | 21065769  | 2111638:  |
| 444 NA11830 | [2515685 chr15 | 15 | 21605983  | 21614603  | 8621   | 8    | 0.808443  | 0.059728 | 21605507  | 21606459  | 21612298  | 2163669!  |
| 445 NA11830 | [2515685 chr15 | 15 | 21922022  | 21934629  | 12608  | 14   | -0.264302 | 0.035767 | 21921481  | 21922563  | 21933907  | 2193535:  |
| 446 NA11830 | [2515685 chr15 | 15 | 24986053  | 24992250  | 6198   | 7    | 0.893848  | 0.061585 | 24985426  | 24986680  | 24991680  | 2499282!  |
| 447 NA11830 | [2515685 chr15 | 15 | 26203425  | 26246225  | 42801  | 57   | -0.301122 | 0.017545 | 26200607  | 26205730  | 26246157  | 2624629:  |
| 448 NA11830 | [2515685 chr15 | 15 | 26331811  | 26343818  | 12008  | 25   | 0.565013  | 0.027156 | 26331265  | 26332358  | 26342288  | 2634534!  |
| 449 NA11830 | [2515685 chr15 | 15 | 26536521  | 26542764  | 6244   | 12   | 0.572914  | 0.03634  | 26534914  | 26538129  | 26542214  | 2654331:  |
| 450 NA11830 | [2515685 chr15 | 15 | 26628330  | 26700617  | 72288  | 138  | -0.271319 | 0.01097  | 26628262  | 26628398  | 26700567  | 2670066:  |

|             |                |    |           |           |        |     |           |          |           |           |           |           |
|-------------|----------------|----|-----------|-----------|--------|-----|-----------|----------|-----------|-----------|-----------|-----------|
| 451 NA11830 | [2515685 chr15 | 15 | 26703103  | 26708043  | 4941   | 13  | -0.26992  | 0.03598  | 26702797  | 26703410  | 26707600  | 2670848   |
| 452 NA11830 | [2515685 chr15 | 15 | 26763606  | 26779808  | 16203  | 30  | -0.261827 | 0.025302 | 26763229  | 26763983  | 26779378  | 26780231  |
| 453 NA11830 | [2515685 chr15 | 15 | 27133105  | 27134889  | 1785   | 5   | 0.381149  | 0.064912 | 27132904  | 27133306  | 27134660  | 27135111  |
| 454 NA11830 | [2515685 chr15 | 15 | 28183172  | 28213264  | 30093  | 61  | -0.342412 | 0.015783 | 28182925  | 28183419  | 28212574  | 28213951  |
| 455 NA11830 | [2515685 chr15 | 15 | 28457108  | 28471779  | 14672  | 32  | -0.394181 | 0.02135  | 28456826  | 28457390  | 28470757  | 28472801  |
| 456 NA11830 | [2515685 chr15 | 15 | 28653461  | 28659029  | 5569   | 11  | -0.423845 | 0.038245 | 28652423  | 28654500  | 28658980  | 28659071  |
| 457 NA11830 | [2515685 chr15 | 15 | 28659478  | 28669456  | 9979   | 19  | -0.443943 | 0.02794  | 28659374  | 28659582  | 28669396  | 28669517  |
| 458 NA11830 | [2515685 chr15 | 15 | 28698697  | 28759428  | 60732  | 72  | -0.521252 | 0.017014 | 28697412  | 28699983  | 28758850  | 28760001  |
| 459 NA11830 | [2515685 chr15 | 15 | 29654194  | 29659019  | 4826   | 3   | 0.426192  | 0.075695 | 29653452  | 29654937  | 29658639  | 29659401  |
| 460 NA11830 | [2515685 chr15 | 15 | 29803457  | 30232844  | 429388 | 380 | 0.487788  | 0.00752  | 29803231  | 29803684  | 30232517  | 30233171  |
| 461 NA11830 | [2515685 chr15 | 15 | 30296241  | 30304776  | 8536   | 5   | 0.537798  | 0.059987 | 30295664  | 30296819  | 30302471  | 30308721  |
| 462 NA11830 | [2515685 chr15 | 15 | 30497138  | 30512521  | 15384  | 33  | -0.402573 | 0.021702 | 30497078  | 30497199  | 30512084  | 30512951  |
| 463 NA11830 | [2515685 chr15 | 15 | 30573260  | 30594507  | 21248  | 26  | -0.35228  | 0.028214 | 30572934  | 30573586  | 30594325  | 30594691  |
| 464 NA11830 | [2515685 chr15 | 15 | 30618243  | 30665227  | 46985  | 89  | -0.289396 | 0.014612 | 30617993  | 30618493  | 30665099  | 30665351  |
| 465 NA11830 | [2515685 chr15 | 15 | 30698867  | 30712535  | 13669  | 17  | -0.405743 | 0.033185 | 30698639  | 30699095  | 30712376  | 30712691  |
| 466 NA11830 | [2515685 chr15 | 15 | 32469460  | 32598425  | 128966 | 121 | 0.358898  | 0.009594 | 32469063  | 32469858  | 32597169  | 32599681  |
| 467 NA11830 | [2515685 chr15 | 15 | 32615681  | 32656877  | 41197  | 47  | 0.358898  | 0.009594 | 32615284  | 32616079  | 32656150  | 32657601  |
| 468 NA11830 | [2515685 chr15 | 15 | 39889385  | 39890850  | 1466   | 2   | 0.517126  | 0.097187 | 39888917  | 39889854  | 39890418  | 39891281  |
| 469 NA11830 | [2515685 chr15 | 15 | 75117585  | 75119946  | 2362   | 4   | -1.980772 | 0.108967 | 75117343  | 75117827  | 75119741  | 75120151  |
| 470 NA11830 | [2515685 chr15 | 15 | 80588100  | 80588985  | 886    | 2   | -0.504845 | 0.07331  | 80587699  | 80588502  | 80588602  | 80589361  |
| 471 NA11830 | [2515685 chr15 | 15 | 83581911  | 83582575  | 665    | 2   | -0.504845 | 0.07331  | 83581731  | 83582092  | 83582192  | 83582951  |
| 472 NA11830 | [2515685 chr15 | 15 | 99806273  | 99808092  | 1820   | 3   | 0.487653  | 0.086875 | 99805943  | 99806604  | 99807825  | 99808361  |
| 473 NA11830 | [2515685 chr15 | 15 | 100109640 | 100122682 | 13043  | 98  | 0.88823   | 0.012146 | 100108905 | 100110376 | 100122315 | 100123051 |
| 474 NA11830 | [2515685 chr16 | 16 | 14696077  | 14703775  | 7699   | 5   | -0.752549 | 0.049029 | 14695838  | 14696316  | 14703313  | 14704231  |
| 475 NA11830 | [2515685 chr16 | 16 | 14735195  | 14742897  | 7703   | 5   | -0.752547 | 0.049029 | 14734956  | 14735434  | 14742435  | 14743351  |
| 476 NA11830 | [2515685 chr16 | 16 | 28324917  | 28335549  | 10633  | 9   | 0.376672  | 0.04752  | 28324665  | 28325169  | 28341190  | 28336901  |
| 477 NA11830 | [2515685 chr16 | 16 | 28348646  | 28349697  | 1052   | 2   | 0.423293  | 0.080298 | 28348298  | 28348994  | 28349000  | 28350391  |
| 478 NA11830 | [2515685 chr16 | 16 | 28602955  | 28604006  | 1052   | 2   | 0.423293  | 0.080298 | 28602258  | 28603652  | 28603658  | 28604351  |
| 479 NA11830 | [2515685 chr16 | 16 | 28617225  | 28628077  | 10853  | 11  | 0.382759  | 0.043886 | 28615757  | 28618694  | 28627777  | 28628371  |
| 480 NA11830 | [2515685 chr16 | 16 | 28717148  | 28718199  | 1052   | 2   | 0.423293  | 0.080298 | 28716451  | 28717845  | 28717851  | 28718541  |
| 481 NA11830 | [2515685 chr16 | 16 | 32154214  | 32158632  | 4419   | 15  | -0.26712  | 0.031145 | 32154161  | 32154267  | 32158484  | 32158781  |
| 482 NA11830 | [2515685 chr16 | 16 | 32159898  | 32160377  | 480    | 2   | -1.257387 | 0.085792 | 32159453  | 32160343  | 32160346  | 32160401  |
| 483 NA11830 | [2515685 chr16 | 16 | 32275177  | 32360004  | 84828  | 87  | -0.258551 | 0.014831 | 32275131  | 32275224  | 32359830  | 32360171  |
| 484 NA11830 | [2515685 chr16 | 16 | 32606692  | 32607163  | 472    | 2   | -1.257412 | 0.085792 | 32606661  | 32606724  | 32606727  | 32607591  |
| 485 NA11830 | [2515685 chr16 | 16 | 32608286  | 32612861  | 4576   | 16  | -0.291079 | 0.029948 | 32607988  | 32608584  | 32612808  | 32612911  |
| 486 NA11830 | [2515685 chr16 | 16 | 33100875  | 33101346  | 472    | 2   | -1.257394 | 0.085792 | 33100438  | 33101312  | 33101315  | 33101371  |
| 487 NA11830 | [2515685 chr16 | 16 | 33157406  | 33157879  | 474    | 2   | -1.257388 | 0.085792 | 33156967  | 33157845  | 33157848  | 33157911  |
| 488 NA11830 | [2515685 chr16 | 16 | 33514720  | 33524277  | 9558   | 14  | -0.302351 | 0.035771 | 33514056  | 33515385  | 33523584  | 33524971  |
| 489 NA11830 | [2515685 chr16 | 16 | 33852540  | 33873809  | 21270  | 13  | 0.350238  | 0.042811 | 33852389  | 33852692  | 33873512  | 33874101  |
| 490 NA11830 | [2515685 chr16 | 16 | 34316873  | 34342005  | 25133  | 32  | -0.485363 | 0.008156 | 34316562  | 34317185  | 34341760  | 34342251  |
| 491 NA11830 | [2515685 chr16 | 16 | 34343871  | 34609075  | 265205 | 287 | -0.485363 | 0.008156 | 34343515  | 34344228  | 34607193  | 34617321  |
| 492 NA11830 | [2515685 chr16 | 16 | 54353711  | 54360305  | 6595   | 8   | -0.451839 | 0.055211 | 54353419  | 54354004  | 54359570  | 54361041  |
| 493 NA11830 | [2515685 chr16 | 16 | 54365075  | 54369383  | 4309   | 6   | -0.759244 | 0.055945 | 54364721  | 54365430  | 54368899  | 54369861  |
| 494 NA11830 | [2515685 chr16 | 16 | 54376230  | 54380125  | 3896   | 3   | -0.684784 | 0.092829 | 54375462  | 54376998  | 54379862  | 54380381  |
| 495 NA11830 | [2515685 chr16 | 16 | 57204541  | 57207585  | 3045   | 3   | 4.568045  | 0.196708 | 57204170  | 57204913  | 57206938  | 57208231  |
| 496 NA11830 | [2515685 chr16 | 16 | 68702274  | 68755580  | 53307  | 59  | -0.587552 | 0.019222 | 68701593  | 68702955  | 68755265  | 68755891  |
| 497 NA11830 | [2515685 chr16 | 16 | 72921362  | 72965445  | 44084  | 41  | -0.500122 | 0.022752 | 72920922  | 72921803  | 72964811  | 72966071  |
| 498 NA11830 | [2515685 chr16 | 16 | 76930776  | 76942282  | 11507  | 9   | 0.69024   | 0.048785 | 76930290  | 76931263  | 76941602  | 76942961  |
| 499 NA11830 | [2515685 chr16 | 16 | 84562720  | 84565235  | 2516   | 11  | 0.644272  | 0.049198 | 84561685  | 84563756  | 84565142  | 84565321  |
| 500 NA11830 | [2515685 chr17 | 17 | 911980    | 915554    | 3575   | 4   | -0.987681 | 0.080215 | 911452    | 912508    | 915413    | 915696    |
| 501 NA11830 | [2515685 chr17 | 17 | 966845    | 969578    | 2734   | 21  | 0.334975  | 0.033567 | 966537    | 967154    | 969378    | 969775    |
| 502 NA11830 | [2515685 chr17 | 17 | 18331739  | 18332345  | 607    | 2   | -0.701939 | 0.09457  | 18331509  | 18331970  | 18331978  | 18332711  |
| 503 NA11830 | [2515685 chr17 | 17 | 20299935  | 20300531  | 597    | 2   | -0.701959 | 0.094572 | 20299568  | 20300303  | 20300311  | 20300751  |
| 504 NA11830 | [2515685 chr17 | 17 | 21617599  | 21628985  | 11387  | 9   | -0.269122 | 0.048802 | 21617211  | 21617987  | 21628782  | 21629181  |
| 505 NA11830 | [2515685 chr17 | 17 | 21826349  | 21834752  | 8404   | 7   | 0.35474   | 0.043427 | 21826238  | 21826461  | 21833710  | 21835791  |

|             |                |    |          |          |        |     |           |          |          |          |          |          |
|-------------|----------------|----|----------|----------|--------|-----|-----------|----------|----------|----------|----------|----------|
| 506 NA11830 | [2515685 chr17 | 17 | 21946928 | 21951091 | 4164   | 7   | -0.394217 | 0.050934 | 21946587 | 21947270 | 21950751 | 21951431 |
| 507 NA11830 | [2515685 chr17 | 17 | 31461078 | 31504184 | 43107  | 34  | 0.526237  | 0.025222 | 31460534 | 31461623 | 31503784 | 31504581 |
| 508 NA11830 | [2515685 chr17 | 17 | 31532462 | 31538972 | 6511   | 8   | 0.411103  | 0.039527 | 31532146 | 31532779 | 31538778 | 31539161 |
| 509 NA11830 | [2515685 chr17 | 17 | 32829500 | 32833231 | 3732   | 5   | 0.910669  | 0.075941 | 32828825 | 32830175 | 32832670 | 32833791 |
| 510 NA11830 | [2515685 chr17 | 17 | 36675530 | 36685343 | 9814   | 10  | -0.758651 | 0.048977 | 36675011 | 36676049 | 36684647 | 36686041 |
| 511 NA11830 | [2515685 chr17 | 17 | 40945023 | 40953889 | 8867   | 11  | 0.465615  | 0.037526 | 40944314 | 40945733 | 40953843 | 40953931 |
| 512 NA11830 | [2515685 chr17 | 17 | 41747612 | 42137416 | 389805 | 428 | 0.294273  | 0.005647 | 41747392 | 41747832 | 42135210 | 42141941 |
| 513 NA11830 | [2515685 chr17 | 17 | 42472562 | 42488850 | 16289  | 23  | 0.354435  | 0.026173 | 42468732 | 42474768 | 42487442 | 42490251 |
| 514 NA11830 | [2515685 chr17 | 17 | 57773860 | 57778057 | 4198   | 3   | -0.490572 | 0.090653 | 57773553 | 57774167 | 57775851 | 57781311 |
| 515 NA11830 | [2515685 chr17 | 17 | 60283908 | 60288568 | 4661   | 8   | 0.456065  | 0.04796  | 60283341 | 60284476 | 60288266 | 60288871 |
| 516 NA11830 | [2515685 chr18 | 18 | 6902997  | 6904611  | 1615   | 2   | -0.701998 | 0.118619 | 6902443  | 6903552  | 6904056  | 6905166  |
| 517 NA11830 | [2515685 chr18 | 18 | 14431853 | 14547645 | 115793 | 156 | -0.268722 | 0.011355 | 14431576 | 14432131 | 14547186 | 14548101 |
| 518 NA11830 | [2515685 chr18 | 18 | 28142218 | 28143399 | 1182   | 2   | 0.720873  | 0.121101 | 28141854 | 28142583 | 28143055 | 28143741 |
| 519 NA11830 | [2515685 chr18 | 18 | 61917747 | 61920171 | 2425   | 4   | 3.058008  | 0.137179 | 61917522 | 61917973 | 61919646 | 61920691 |
| 520 NA11830 | [2515685 chr18 | 18 | 74373005 | 74376367 | 3363   | 7   | -1.034017 | 0.038303 | 74372064 | 74373947 | 74375833 | 74376901 |
| 521 NA11830 | [2515685 chr18 | 18 | 74392800 | 74398225 | 5426   | 4   | 0.714502  | 0.075823 | 74390826 | 74394774 | 74397790 | 74398661 |
| 522 NA11830 | [2515685 chr19 | 19 | 1200296  | 1202522  | 2227   | 3   | 0.609149  | 0.088353 | 1199725  | 1199725  | 1200868  | 1202841  |
| 523 NA11830 | [2515685 chr19 | 19 | 8707491  | 8760468  | 52978  | 90  | -0.333993 | 0.010915 | 8706686  | 8708296  | 8760209  | 8760721  |
| 524 NA11830 | [2515685 chr19 | 19 | 23007899 | 23014812 | 6914   | 7   | 0.652629  | 0.059672 | 22990964 | 23010431 | 23014157 | 23015461 |
| 525 NA11830 | [2515685 chr19 | 19 | 23257205 | 23258538 | 1334   | 2   | -1.015015 | 0.127411 | 23256882 | 23257529 | 23258213 | 23258861 |
| 526 NA11830 | [2515685 chr19 | 19 | 23597182 | 23600235 | 3054   | 5   | -0.887555 | 0.068946 | 23596541 | 23597823 | 23599600 | 23600871 |
| 527 NA11830 | [2515685 chr19 | 19 | 24147959 | 24148730 | 772    | 3   | -0.619533 | 0.084055 | 24147835 | 24148083 | 24148193 | 24149261 |
| 528 NA11830 | [2515685 chr19 | 19 | 39419837 | 39421349 | 1513   | 3   | 0.846751  | 0.099022 | 39419616 | 39420059 | 39421018 | 39421681 |
| 529 NA11830 | [2515685 chr19 | 19 | 58210435 | 58244458 | 34024  | 26  | -0.74876  | 0.030205 | 58209863 | 58211007 | 58243893 | 58245021 |
| 530 NA11830 | [2515685 chr19 | 19 | 59417162 | 59439924 | 22763  | 31  | 0.39196   | 0.023811 | 59416759 | 59417566 | 59439547 | 59440301 |
| 531 NA11830 | [2515685 chr19 | 19 | 59492384 | 59498950 | 6567   | 7   | 0.391428  | 0.053156 | 59491977 | 59492791 | 59497077 | 59500821 |
| 532 NA11830 | [2515685 chr19 | 19 | 59949691 | 59988726 | 39036  | 45  | -0.310769 | 0.021162 | 59947606 | 59951776 | 59988509 | 59988941 |
| 533 NA11830 | [2515685 chr19 | 19 | 60958920 | 60976029 | 17110  | 15  | -0.751181 | 0.039178 | 60957933 | 60959907 | 60975748 | 60976311 |
| 534 NA11830 | [2515685 chr20 | 20 | 1511097  | 1532477  | 21381  | 26  | -2.240461 | 0.047752 | 1510534  | 1511660  | 1532182  | 1532771  |
| 535 NA11830 | [2515685 chr20 | 20 | 1533575  | 1537053  | 3479   | 8   | -0.310978 | 0.042704 | 1533384  | 1533766  | 1536863  | 1537241  |
| 536 NA11830 | [2515685 chr20 | 20 | 26147697 | 26161501 | 13805  | 23  | -0.378247 | 0.030669 | 26147451 | 26147944 | 26161227 | 26161771 |
| 537 NA11830 | [2515685 chr20 | 20 | 28142178 | 28145341 | 3164   | 5   | 0.34759   | 0.068285 | 28141812 | 28142544 | 28145025 | 28145651 |
| 538 NA11830 | [2515685 chr20 | 20 | 61708834 | 61711805 | 2972   | 22  | -0.312781 | 0.031648 | 61708573 | 61709096 | 61711616 | 61711991 |
| 539 NA11830 | [2515685 chr20 | 20 | 62063620 | 62068214 | 4595   | 12  | 0.379332  | 0.040892 | 62063139 | 62064102 | 62067671 | 62068751 |
| 540 NA11830 | [2515685 chr20 | 20 | 62113559 | 62121334 | 7776   | 22  | -0.366548 | 0.032393 | 62113491 | 62113628 | 62120828 | 62121841 |
| 541 NA11830 | [2515685 chr20 | 20 | 62233505 | 62235897 | 2393   | 4   | -0.459952 | 0.058837 | 62232847 | 62234163 | 62235101 | 62236691 |
| 542 NA11830 | [2515685 chr20 | 20 | 62406545 | 62433925 | 27381  | 18  | -0.37595  | 0.03574  | 62406526 | 62406565 | 62431887 | 62435961 |
| 543 NA11830 | [2515685 chr21 | 21 | 10044824 | 10148558 | 103735 | 102 | -0.284586 | 0.014093 | 10044606 | 10045043 | 10147688 | 10149421 |
| 544 NA11830 | [2515685 chr21 | 21 | 13905235 | 14010819 | 105585 | 149 | -0.273746 | 0.011651 | 13904937 | 13905534 | 14010461 | 14011171 |
| 545 NA11830 | [2515685 chr22 | 22 | 14474806 | 14747237 | 272432 | 513 | -0.29544  | 0.005163 | 14474622 | 14474991 | 14746998 | 14747471 |
| 546 NA11830 | [2515685 chr22 | 22 | 14750345 | 14830910 | 80566  | 143 | -0.29544  | 0.005163 | 14750176 | 14750515 | 14830451 | 14831361 |
| 547 NA11830 | [2515685 chr22 | 22 | 15281100 | 15343154 | 62055  | 67  | -0.273402 | 0.017229 | 15281004 | 15281197 | 15343008 | 15343301 |
| 548 NA11830 | [2515685 chr22 | 22 | 17070348 | 17078111 | 7764   | 5   | -0.458702 | 0.054665 | 17069961 | 17070736 | 17077823 | 17078401 |
| 549 NA11830 | [2515685 chr22 | 22 | 18744519 | 18796475 | 51957  | 62  | -0.347071 | 0.012852 | 18742262 | 18746777 | 18796170 | 18796781 |
| 550 NA11830 | [2515685 chr22 | 22 | 18800091 | 18850243 | 50153  | 58  | -0.347071 | 0.012852 | 18800036 | 18800147 | 18849954 | 18850531 |
| 551 NA11830 | [2515685 chr22 | 22 | 18876047 | 18881587 | 5541   | 3   | -0.494318 | 0.057358 | 18875675 | 18876420 | 18878903 | 18934141 |
| 552 NA11830 | [2515685 chr22 | 22 | 18998692 | 19006457 | 7766   | 5   | -0.458702 | 0.054665 | 18998404 | 18998981 | 19006070 | 19006841 |
| 553 NA11830 | [2515685 chr22 | 22 | 19392079 | 19419490 | 27412  | 8   | -0.514001 | 0.053153 | 19391751 | 19392407 | 19416806 | 19449921 |
| 554 NA11830 | [2515685 chr22 | 22 | 20012065 | 20020668 | 8604   | 6   | -0.478954 | 0.051929 | 20011608 | 20012523 | 20020380 | 20020951 |
| 555 NA11830 | [2515685 chr22 | 22 | 20051185 | 20121795 | 70611  | 112 | -0.303739 | 0.008706 | 20050756 | 20051615 | 20121548 | 20122041 |
| 556 NA11830 | [2515685 chr22 | 22 | 20137248 | 20243645 | 106398 | 148 | -0.303739 | 0.008706 | 20136561 | 20137935 | 20240961 | 20302281 |
| 557 NA11830 | [2515685 chr22 | 22 | 22670700 | 22720154 | 49455  | 52  | 0.778797  | 0.02444  | 22670152 | 22671248 | 22719882 | 22720421 |
| 558 NA11830 | [2515685 chr22 | 22 | 22720446 | 22729265 | 8820   | 12  | 0.287995  | 0.039142 | 22720426 | 22720466 | 22728912 | 22729611 |
| 559 NA11830 | [2515685 chr22 | 22 | 23974319 | 23982944 | 8626   | 8   | -0.423216 | 0.00909  | 23973751 | 23974888 | 23982199 | 23983681 |
| 560 NA11830 | [2515685 chr22 | 22 | 23988425 | 24082612 | 94188  | 90  | -0.423216 | 0.00909  | 23987624 | 23989226 | 24082299 | 24082921 |

|             |                |    |           |           |       |    |           |          |           |           |           |           |
|-------------|----------------|----|-----------|-----------|-------|----|-----------|----------|-----------|-----------|-----------|-----------|
| 561 NA11830 | [2515685 chr22 | 22 | 24087504  | 24096693  | 9190  | 12 | -0.423216 | 0.00909  | 24087104  | 24087904  | 24096386  | 24097000  |
| 562 NA11830 | [2515685 chr22 | 22 | 24106509  | 24175760  | 69252 | 67 | -0.423216 | 0.00909  | 24106165  | 24106854  | 24175428  | 24176090  |
| 563 NA11830 | [2515685 chr22 | 22 | 24178757  | 24244359  | 65603 | 64 | -0.423216 | 0.00909  | 24177910  | 24179605  | 24244066  | 24244650  |
| 564 NA11830 | [2515685 chr22 | 22 | 33619409  | 33623490  | 4082  | 5  | 0.868606  | 0.070184 | 33618939  | 33619879  | 33622642  | 33624330  |
| 565 NA11830 | [2515685 chr22 | 22 | 36466389  | 36468008  | 1620  | 2  | 0.593004  | 0.113673 | 36466071  | 36466707  | 36467496  | 36468520  |
| 566 NA11830 | [2515685 chr22 | 22 | 37617530  | 37624015  | 6486  | 8  | -0.815418 | 0.056786 | 37616333  | 37618728  | 37621331  | 37627050  |
| 567 NA11830 | [2515685 chr22 | 22 | 41214550  | 41279753  | 65204 | 55 | 0.360833  | 0.018246 | 41213953  | 41215148  | 41278713  | 41280790  |
| 568 NA11830 | [2515685 chr22 | 22 | 43418479  | 43419675  | 1197  | 2  | 0.532972  | 0.099311 | 43418051  | 43418907  | 43419378  | 43419970  |
| 1 NA19240   | [2515685 chr1  | 1  | 29401     | 71292     | 41892 | 51 | 0.456078  | 0.020187 | 27752     | 31050     | 70533     | 72052     |
| 2 NA19240   | [2515685 chr1  | 1  | 601045    | 612159    | 11115 | 8  | -1.021709 | 0.055142 | 587801    | 604315    | 610122    | 614196    |
| 3 NA19240   | [2515685 chr1  | 1  | 12822755  | 12826783  | 4029  | 7  | -0.261286 | 0.050972 | 12822536  | 12822974  | 12826392  | 12827170  |
| 4 NA19240   | [2515685 chr1  | 1  | 12833670  | 12835034  | 1365  | 3  | 0.518965  | 0.093789 | 12833445  | 12833896  | 12834479  | 12835590  |
| 5 NA19240   | [2515685 chr1  | 1  | 12843376  | 12863839  | 20464 | 27 | 0.2871    | 0.025954 | 12843104  | 12843649  | 12860569  | 12868610  |
| 6 NA19240   | [2515685 chr1  | 1  | 13003194  | 13005544  | 2351  | 2  | -0.453855 | 0.087983 | 13002480  | 13003908  | 13004767  | 13006320  |
| 7 NA19240   | [2515685 chr1  | 1  | 13014231  | 13074923  | 60693 | 5  | -0.481444 | 0.061199 | 13013335  | 13015127  | 13074668  | 13075170  |
| 8 NA19240   | [2515685 chr1  | 1  | 13084586  | 13091899  | 7314  | 4  | -0.588852 | 0.065754 | 13084070  | 13085102  | 13091561  | 13092230  |
| 9 NA19240   | [2515685 chr1  | 1  | 13159940  | 13162706  | 2767  | 4  | 0.534278  | 0.054271 | 13159618  | 13160263  | 13162366  | 13163040  |
| 10 NA19240  | [2515685 chr1  | 1  | 13216105  | 13221017  | 4913  | 6  | -0.288344 | 0.047876 | 13214189  | 13218021  | 13220643  | 13221390  |
| 11 NA19240  | [2515685 chr1  | 1  | 13229863  | 13236232  | 6370  | 2  | -0.560374 | 0.076562 | 13228358  | 13231368  | 13235848  | 13236610  |
| 12 NA19240  | [2515685 chr1  | 1  | 13380737  | 13383503  | 2767  | 4  | 0.534278  | 0.054271 | 13380415  | 13381060  | 13383163  | 13383880  |
| 13 NA19240  | [2515685 chr1  | 1  | 13439899  | 13441853  | 1955  | 4  | -0.381466 | 0.061587 | 13439437  | 13440361  | 13441479  | 13442220  |
| 14 NA19240  | [2515685 chr1  | 1  | 13450095  | 13457066  | 6972  | 3  | -0.512059 | 0.068406 | 13449190  | 13451001  | 13456679  | 13457450  |
| 15 NA19240  | [2515685 chr1  | 1  | 13518505  | 13522174  | 3670  | 4  | -0.776354 | 0.082345 | 13517560  | 13519451  | 13521947  | 13522400  |
| 16 NA19240  | [2515685 chr1  | 1  | 25330950  | 25410555  | 79606 | 78 | 0.329259  | 0.016182 | 25330662  | 25331238  | 25410173  | 25410930  |
| 17 NA19240  | [2515685 chr1  | 1  | 25434181  | 25487480  | 53300 | 27 | 0.272642  | 0.02776  | 25433990  | 25434373  | 25484210  | 25512930  |
| 18 NA19240  | [2515685 chr1  | 1  | 72478372  | 72524180  | 45809 | 36 | 0.848129  | 0.026074 | 72478140  | 72478604  | 72523661  | 72524700  |
| 19 NA19240  | [2515685 chr1  | 1  | 89188689  | 89189555  | 867   | 2  | 4.328226  | 0.255355 | 89188470  | 89188908  | 89189310  | 89189800  |
| 20 NA19240  | [2515685 chr1  | 1  | 94869509  | 94870854  | 1346  | 3  | 0.573256  | 0.074775 | 94869219  | 94869799  | 94870647  | 94871106  |
| 21 NA19240  | [2515685 chr1  | 1  | 103857696 | 103866317 | 8622  | 11 | -0.251927 | 0.045326 | 103857666 | 103857727 | 103865345 | 103867290 |
| 22 NA19240  | [2515685 chr1  | 1  | 105728161 | 105735462 | 7302  | 8  | -0.951719 | 0.061638 | 105727820 | 105728503 | 105734532 | 105736390 |
| 23 NA19240  | [2515685 chr1  | 1  | 108444641 | 108449550 | 4910  | 9  | 0.705965  | 0.051175 | 108443817 | 108445466 | 108449224 | 108449870 |
| 24 NA19240  | [2515685 chr1  | 1  | 108514938 | 108550116 | 35179 | 53 | 0.3531    | 0.020466 | 108514864 | 108515012 | 108549650 | 108550580 |
| 25 NA19240  | [2515685 chr1  | 1  | 108638318 | 108688767 | 50450 | 59 | 0.363128  | 0.019429 | 108638254 | 108638383 | 108688693 | 108688880 |
| 26 NA19240  | [2515685 chr1  | 1  | 109929748 | 109966604 | 36857 | 40 | 0.841142  | 0.024272 | 109929322 | 109930175 | 109966387 | 109966682 |
| 27 NA19240  | [2515685 chr1  | 1  | 111089464 | 111100714 | 11251 | 11 | -0.92418  | 0.049407 | 111088288 | 111090640 | 111100119 | 111101310 |
| 28 NA19240  | [2515685 chr1  | 1  | 112405902 | 112416691 | 10790 | 10 | 0.701003  | 0.050405 | 112405415 | 112406389 | 112416423 | 112416960 |
| 29 NA19240  | [2515685 chr1  | 1  | 142744385 | 142745273 | 889   | 2  | 0.778285  | 0.116622 | 142743794 | 142744976 | 142745023 | 142745520 |
| 30 NA19240  | [2515685 chr1  | 1  | 145819541 | 145839481 | 19941 | 22 | 0.43694   | 0.032281 | 145819262 | 145819821 | 145839093 | 145839860 |
| 31 NA19240  | [2515685 chr1  | 1  | 145929568 | 145951531 | 21964 | 26 | 0.497253  | 0.028937 | 145929405 | 145929732 | 145951467 | 145951590 |
| 32 NA19240  | [2515685 chr1  | 1  | 145965166 | 145976652 | 11487 | 10 | 0.403574  | 0.045693 | 145964647 | 145965685 | 145974769 | 145978530 |
| 33 NA19240  | [2515685 chr1  | 1  | 149461637 | 149471706 | 10070 | 14 | 0.445481  | 0.038612 | 149461310 | 149461964 | 149471383 | 149472030 |
| 34 NA19240  | [2515685 chr1  | 1  | 149573821 | 149583431 | 9611  | 5  | 0.931387  | 0.076034 | 149573460 | 149574182 | 149582912 | 149583990 |
| 35 NA19240  | [2515685 chr1  | 1  | 158224068 | 158225480 | 1413  | 2  | -0.584891 | 0.073813 | 158223552 | 158224584 | 158225276 | 158225680 |
| 36 NA19240  | [2515685 chr1  | 1  | 158225480 | 158231105 | 5626  | 9  | 0.257532  | 0.037609 | 158225276 | 158225685 | 158230227 | 158231980 |
| 37 NA19240  | [2515685 chr1  | 1  | 158231105 | 158232881 | 1777  | 2  | -0.584891 | 0.073813 | 158230227 | 158231984 | 158232676 | 158233080 |
| 38 NA19240  | [2515685 chr1  | 1  | 158232881 | 158238832 | 5952  | 8  | 0.275297  | 0.040215 | 158232676 | 158233086 | 158237607 | 158240005 |
| 39 NA19240  | [2515685 chr1  | 1  | 158240261 | 158245896 | 5636  | 9  | 0.260539  | 0.037867 | 158240057 | 158240466 | 158245018 | 158246770 |
| 40 NA19240  | [2515685 chr1  | 1  | 158245896 | 158247672 | 1777  | 2  | -0.584897 | 0.073814 | 158245018 | 158246775 | 158247467 | 158247870 |
| 41 NA19240  | [2515685 chr1  | 1  | 158247672 | 158253277 | 5606  | 9  | 0.267512  | 0.037527 | 158247467 | 158247877 | 158252398 | 158254150 |
| 42 NA19240  | [2515685 chr1  | 1  | 158253277 | 158255053 | 1777  | 2  | -0.584897 | 0.073814 | 158252398 | 158254156 | 158254848 | 158255250 |
| 43 NA19240  | [2515685 chr1  | 1  | 158294538 | 158376771 | 82234 | 96 | -0.266778 | 0.014605 | 158294226 | 158294850 | 158376340 | 158377200 |
| 44 NA19240  | [2515685 chr1  | 1  | 159083853 | 159086136 | 2284  | 3  | 0.450838  | 0.088318 | 159083104 | 159084603 | 159085870 | 159086640 |
| 45 NA19240  | [2515685 chr1  | 1  | 185975508 | 185978532 | 3025  | 4  | -1.013807 | 0.081299 | 185975191 | 185975825 | 185978249 | 185978810 |
| 46 NA19240  | [2515685 chr1  | 1  | 192140730 | 192148337 | 7608  | 4  | -0.898599 | 0.080738 | 192139191 | 192142269 | 192145067 | 192152490 |
| 47 NA19240  | [2515685 chr1  | 1  | 192539696 | 192547982 | 8287  | 5  | -0.35195  | 0.06541  | 192539032 | 192540360 | 192547786 | 192548170 |

|             |               |   |           |           |        |    |           |          |           |           |           |          |
|-------------|---------------|---|-----------|-----------|--------|----|-----------|----------|-----------|-----------|-----------|----------|
| 48 NA19240  | [2515685 chr1 | 1 | 193448393 | 193553262 | 104870 | 88 | 0.479964  | 0.015913 | 193448156 | 193448631 | 193553050 | 19355347 |
| 49 NA19240  | [2515685 chr1 | 1 | 193619849 | 193649321 | 29473  | 22 | 0.262428  | 0.030098 | 193619444 | 193620254 | 193648860 | 19364978 |
| 50 NA19240  | [2515685 chr1 | 1 | 218762650 | 218768272 | 5623   | 6  | 0.45481   | 0.062057 | 218762212 | 218763089 | 218767017 | 21876952 |
| 51 NA19240  | [2515685 chr1 | 1 | 226117234 | 226125723 | 8490   | 2  | -0.830209 | 0.113968 | 226114786 | 226119683 | 226122453 | 22612975 |
| 52 NA19240  | [2515685 chr1 | 1 | 233202665 | 233204956 | 2292   | 42 | -0.759282 | 0.019357 | 233202312 | 233203018 | 233204364 | 23320554 |
| 53 NA19240  | [2515685 chr1 | 1 | 236719047 | 236720968 | 1922   | 3  | -3.309109 | 0.159364 | 236718751 | 236719344 | 236720749 | 23672118 |
| 54 NA19240  | [2515685 chr1 | 1 | 239368545 | 239481884 | 113340 | 13 | -0.507215 | 0.041719 | 239368239 | 239368851 | 239478614 | 23949135 |
| 55 NA19240  | [2515685 chr1 | 1 | 244259220 | 244260704 | 1485   | 4  | -0.532565 | 0.074245 | 244259044 | 244259396 | 244260429 | 24426097 |
| 56 NA19240  | [2515685 chr1 | 1 | 244935197 | 244936698 | 1502   | 4  | -0.411874 | 0.074173 | 244934954 | 244935441 | 244936297 | 24493710 |
| 57 NA19240  | [2515685 chr1 | 1 | 245065841 | 245121920 | 56080  | 53 | -0.758536 | 0.021048 | 245065663 | 245066019 | 245121605 | 24512223 |
| 58 NA19240  | [2515685 chr1 | 1 | 245195364 | 245200716 | 5353   | 6  | -2.869791 | 0.110368 | 245194714 | 245196015 | 245200082 | 24520135 |
| 59 NA19240  | [2515685 chr2 | 2 | 6248930   | 6258838   | 9909   | 11 | -0.978076 | 0.046907 | 6248417   | 6249444   | 6258311   | 6259366  |
| 60 NA19240  | [2515685 chr2 | 2 | 13466341  | 13504710  | 38370  | 37 | 0.281617  | 0.016564 | 13466145  | 13466538  | 1350553   | 1350553  |
| 61 NA19240  | [2515685 chr2 | 2 | 13531646  | 13548027  | 16382  | 16 | 0.281617  | 0.016564 | 13530427  | 13532866  | 13547735  | 1354831  |
| 62 NA19240  | [2515685 chr2 | 2 | 14629924  | 14635533  | 5610   | 3  | -0.416302 | 0.078226 | 14627422  | 14632427  | 14634482  | 1463658  |
| 63 NA19240  | [2515685 chr2 | 2 | 34606439  | 34644770  | 38332  | 39 | 0.758343  | 0.02444  | 34601818  | 34609397  | 34641812  | 3464839  |
| 64 NA19240  | [2515685 chr2 | 2 | 34739031  | 34741295  | 2265   | 3  | -0.88492  | 0.098275 | 34738758  | 34739304  | 34740438  | 3474215  |
| 65 NA19240  | [2515685 chr2 | 2 | 35492615  | 35529746  | 37132  | 37 | -0.842846 | 0.026149 | 35491400  | 35493831  | 35527391  | 3553210  |
| 66 NA19240  | [2515685 chr2 | 2 | 35896472  | 35905937  | 9466   | 3  | -0.839261 | 0.084045 | 35879425  | 35899430  | 35902979  | 3590982  |
| 67 NA19240  | [2515685 chr2 | 2 | 38354260  | 38871413  | 517154 | 6  | -0.267887 | 0.052732 | 38269962  | 38357218  | 38868455  | 3899384  |
| 68 NA19240  | [2515685 chr2 | 2 | 56563619  | 56567381  | 3763   | 2  | 3.438893  | 0.190964 | 56556559  | 56566577  | 56567035  | 5656772  |
| 69 NA19240  | [2515685 chr2 | 2 | 56631771  | 56663004  | 31234  | 37 | 0.485598  | 0.024263 | 56631541  | 56632002  | 56662399  | 5666360  |
| 70 NA19240  | [2515685 chr2 | 2 | 61614590  | 61616693  | 2104   | 2  | -0.578369 | 0.107172 | 61614200  | 61614981  | 61616346  | 6161704  |
| 71 NA19240  | [2515685 chr2 | 2 | 71254096  | 71259851  | 5756   | 7  | -0.546871 | 0.05605  | 71253721  | 71254472  | 71259334  | 7126036  |
| 72 NA19240  | [2515685 chr2 | 2 | 75296507  | 75298934  | 2428   | 2  | 0.508774  | 0.100461 | 75296056  | 75296959  | 75298532  | 7529933  |
| 73 NA19240  | [2515685 chr2 | 2 | 87965257  | 88098957  | 133701 | 11 | 0.252157  | 0.044956 | 87964592  | 87965922  | 88097049  | 8810086  |
| 74 NA19240  | [2515685 chr2 | 2 | 90000217  | 90019296  | 19080  | 43 | 0.262932  | 0.021406 | 90000164  | 90000270  | 90016338  | 9103802  |
| 75 NA19240  | [2515685 chr2 | 2 | 91135088  | 91149350  | 14263  | 38 | 0.285246  | 0.02257  | 91134771  | 91135405  | 91149246  | 9114945  |
| 76 NA19240  | [2515685 chr2 | 2 | 97184386  | 97189740  | 5355   | 2  | -0.733382 | 0.099172 | 97182781  | 97185992  | 97186782  | 9719672  |
| 77 NA19240  | [2515685 chr2 | 2 | 97504383  | 97505604  | 1222   | 3  | 0.362975  | 0.072258 | 97503946  | 97504821  | 97505350  | 9750585  |
| 78 NA19240  | [2515685 chr2 | 2 | 97613796  | 97614932  | 1137   | 2  | 1.122315  | 0.124484 | 97613553  | 97614040  | 97614467  | 9761539  |
| 79 NA19240  | [2515685 chr2 | 2 | 106339466 | 106344320 | 4855   | 6  | -1.193094 | 0.077557 | 106339069 | 106339864 | 106344055 | 10634458 |
| 80 NA19240  | [2515685 chr2 | 2 | 108313968 | 108314875 | 908    | 2  | 0.687026  | 0.108281 | 108313664 | 108314272 | 108314680 | 10831507 |
| 81 NA19240  | [2515685 chr2 | 2 | 110105869 | 110114738 | 8870   | 14 | 0.30121   | 0.036111 | 110103316 | 110108422 | 110114256 | 11011522 |
| 82 NA19240  | [2515685 chr2 | 2 | 110563802 | 110572767 | 8966   | 13 | 0.306992  | 0.038407 | 110563321 | 110564284 | 110570196 | 11057533 |
| 83 NA19240  | [2515685 chr2 | 2 | 111696774 | 111699712 | 2939   | 17 | -0.255934 | 0.033384 | 111696413 | 111697136 | 111699396 | 11170002 |
| 84 NA19240  | [2515685 chr2 | 2 | 126159437 | 126168349 | 8913   | 3  | -2.660036 | 0.131733 | 126158494 | 126160381 | 126168048 | 12616865 |
| 85 NA19240  | [2515685 chr2 | 2 | 130265328 | 130274460 | 9133   | 13 | -0.422584 | 0.040986 | 130264902 | 130265754 | 130273870 | 13027505 |
| 86 NA19240  | [2515685 chr2 | 2 | 130449037 | 130450259 | 1223   | 2  | -0.649675 | 0.096629 | 130448725 | 130449350 | 130449916 | 13045060 |
| 87 NA19240  | [2515685 chr2 | 2 | 131845908 | 131852310 | 6403   | 10 | -0.273212 | 0.041895 | 131845514 | 131846302 | 131852270 | 13185235 |
| 88 NA19240  | [2515685 chr2 | 2 | 131949198 | 131957766 | 8569   | 12 | -0.324499 | 0.044207 | 131948970 | 131949427 | 131957432 | 13195810 |
| 89 NA19240  | [2515685 chr2 | 2 | 146694140 | 146710744 | 16605  | 17 | 0.793868  | 0.041018 | 146688620 | 146697098 | 146710557 | 14671093 |
| 90 NA19240  | [2515685 chr2 | 2 | 153495545 | 153499409 | 3865   | 2  | 0.681197  | 0.1251   | 153484545 | 153498503 | 153498846 | 15349997 |
| 91 NA19240  | [2515685 chr2 | 2 | 153622711 | 153625256 | 2546   | 3  | 0.891447  | 0.092809 | 153621175 | 153624247 | 153625088 | 15362542 |
| 92 NA19240  | [2515685 chr2 | 2 | 208176479 | 208184457 | 7979   | 7  | 0.901637  | 0.059323 | 208176093 | 208176865 | 208183930 | 20818498 |
| 93 NA19240  | [2515685 chr2 | 2 | 216235038 | 216236719 | 1682   | 2  | 0.520539  | 0.096528 | 216234724 | 216235352 | 216236128 | 21623731 |
| 94 NA19240  | [2515685 chr2 | 2 | 232512469 | 232537143 | 24675  | 6  | -0.27446  | 0.045097 | 232511142 | 232513796 | 232534243 | 23254004 |
| 95 NA19240  | [2515685 chr2 | 2 | 242661256 | 242662332 | 1077   | 7  | 0.284652  | 0.048976 | 242661125 | 242661388 | 242662217 | 24266244 |
| 96 NA19240  | [2515685 chr2 | 2 | 242664580 | 242668683 | 4104   | 10 | 0.743629  | 0.038325 | 242664284 | 242664877 | 242668532 | 24266883 |
| 97 NA19240  | [2515685 chr3 | 3 | 149944    | 152369    | 2426   | 4  | 1.334387  | 0.08284  | 148712    | 151176    | 151848    | 15289    |
| 98 NA19240  | [2515685 chr3 | 3 | 204650    | 209394    | 4745   | 4  | 0.80852   | 0.073362 | 202918    | 206383    | 209009    | 20977    |
| 99 NA19240  | [2515685 chr3 | 3 | 1757211   | 1765710   | 8500   | 2  | 0.74228   | 0.114967 | 1756096   | 1758327   | 1762058   | 179730   |
| 100 NA19240 | [2515685 chr3 | 3 | 46770085  | 46826525  | 56441  | 14 | -1.679872 | 0.053133 | 46769108  | 46771063  | 46826330  | 4682672  |
| 101 NA19240 | [2515685 chr3 | 3 | 76066312  | 76081451  | 15140  | 19 | -0.314168 | 0.032929 | 76065787  | 76066838  | 76081180  | 7608172  |
| 102 NA19240 | [2515685 chr3 | 3 | 89752413  | 89760941  | 8529   | 10 | -0.852277 | 0.053794 | 89752004  | 89752823  | 89760716  | 8976116  |

|             |               |   |           |           |        |     |           |          |           |           |           |           |
|-------------|---------------|---|-----------|-----------|--------|-----|-----------|----------|-----------|-----------|-----------|-----------|
| 103 NA19240 | [2515685 chr3 | 3 | 98676981  | 98686633  | 9653   | 2   | -0.583265 | 0.082963 | 98564670  | 98680633  | 98684714  | 9868855;  |
| 104 NA19240 | [2515685 chr3 | 3 | 127155656 | 127158873 | 3218   | 5   | -0.489993 | 0.062173 | 127155390 | 127155923 | 127158237 | 12715950  |
| 105 NA19240 | [2515685 chr3 | 3 | 139287057 | 139289507 | 2451   | 3   | 0.849017  | 0.105156 | 139286041 | 139288073 | 139289200 | 13928981. |
| 106 NA19240 | [2515685 chr3 | 3 | 144093469 | 144095523 | 2055   | 3   | -0.965174 | 0.095309 | 144093374 | 144093564 | 144094696 | 14409635  |
| 107 NA19240 | [2515685 chr3 | 3 | 144701165 | 144703799 | 2635   | 2   | -1.01959  | 0.121271 | 144699852 | 144702479 | 144703331 | 14470426  |
| 108 NA19240 | [2515685 chr3 | 3 | 156042614 | 156043843 | 1230   | 2   | -0.583446 | 0.106667 | 156042074 | 156043154 | 156043483 | 15604420  |
| 109 NA19240 | [2515685 chr3 | 3 | 163994592 | 164106273 | 111682 | 102 | 2.301463  | 0.025891 | 163993392 | 163995793 | 164106029 | 16410651  |
| 110 NA19240 | [2515685 chr3 | 3 | 191219813 | 191223326 | 3514   | 4   | -2.304649 | 0.116457 | 191219291 | 191220336 | 191222918 | 19122373. |
| 111 NA19240 | [2515685 chr3 | 3 | 192547312 | 192554331 | 7020   | 10  | 0.827764  | 0.052068 | 192546950 | 192547674 | 192554127 | 19255453  |
| 112 NA19240 | [2515685 chr3 | 3 | 194357854 | 194368035 | 10182  | 12  | 2.075665  | 0.06919  | 194357665 | 194358044 | 194367817 | 19436825  |
| 113 NA19240 | [2515685 chr3 | 3 | 196994475 | 197002965 | 8491   | 10  | 0.380513  | 0.043573 | 196994054 | 196994896 | 197002044 | 19700388  |
| 114 NA19240 | [2515685 chr3 | 3 | 198043467 | 198046340 | 2874   | 4   | 0.510145  | 0.068088 | 198043278 | 198043657 | 198045914 | 19804676  |
| 115 NA19240 | [2515685 chr3 | 3 | 198421889 | 198427408 | 5520   | 3   | 0.743208  | 0.088035 | 198421397 | 198422381 | 198423959 | 19843085  |
| 116 NA19240 | [2515685 chr3 | 3 | 198674426 | 198675470 | 1045   | 6   | -0.695792 | 0.051795 | 198674161 | 198674692 | 198674903 | 19867603. |
| 117 NA19240 | [2515685 chr3 | 3 | 199313925 | 199321063 | 7139   | 15  | 1.626368  | 0.033247 | 199313515 | 199314336 | 199320844 | 19932128  |
| 118 NA19240 | [2515685 chr4 | 4 | 3714193   | 3715251   | 1059   | 2   | 0.989387  | 0.120539 | 3713862   | 3714524   | 3714881   | 3715627   |
| 119 NA19240 | [2515685 chr4 | 4 | 8739800   | 8756949   | 17150  | 26  | 0.487854  | 0.021924 | 8739551   | 8740049   | 8756813   | 8757086   |
| 120 NA19240 | [2515685 chr4 | 4 | 8998175   | 9046719   | 48545  | 87  | 0.967034  | 0.011864 | 8850774   | 9001243   | 9046129   | 9047309   |
| 121 NA19240 | [2515685 chr4 | 4 | 9812346   | 9813108   | 763    | 33  | 2.258278  | 0.026712 | 9812284   | 9812408   | 9812952   | 9813265   |
| 122 NA19240 | [2515685 chr4 | 4 | 9887220   | 9911397   | 24178  | 30  | 2.045514  | 0.044832 | 9886886   | 9887555   | 9910388   | 9912407   |
| 123 NA19240 | [2515685 chr4 | 4 | 12338517  | 12354476  | 15960  | 5   | -0.350168 | 0.067304 | 12337966  | 12339068  | 12353543  | 12355409  |
| 124 NA19240 | [2515685 chr4 | 4 | 21045633  | 21053532  | 7900   | 8   | -0.979243 | 0.057594 | 21045231  | 21046035  | 21053115  | 21053956  |
| 125 NA19240 | [2515685 chr4 | 4 | 21618176  | 21619536  | 1361   | 2   | -0.562272 | 0.0997   | 21617895  | 21618458  | 21619251  | 21619827  |
| 126 NA19240 | [2515685 chr4 | 4 | 28258384  | 28261621  | 3238   | 2   | 0.586578  | 0.115712 | 28258088  | 28258681  | 28261358  | 2826188.  |
| 127 NA19240 | [2515685 chr4 | 4 | 28620405  | 28629396  | 8992   | 7   | -1.003397 | 0.063014 | 28619577  | 28621234  | 28628876  | 28629917  |
| 128 NA19240 | [2515685 chr4 | 4 | 28902859  | 28909980  | 7122   | 7   | -1.052858 | 0.064204 | 28902652  | 28903066  | 28906912  | 28914351  |
| 129 NA19240 | [2515685 chr4 | 4 | 34602797  | 34650994  | 48198  | 45  | 0.782416  | 0.023937 | 34601994  | 34603600  | 34649535  | 3465245.  |
| 130 NA19240 | [2515685 chr4 | 4 | 42543238  | 42546856  | 3619   | 2   | 0.741985  | 0.100497 | 42538590  | 42546306  | 42546636  | 42547071  |
| 131 NA19240 | [2515685 chr4 | 4 | 57380811  | 57385462  | 4652   | 5   | -0.732809 | 0.068732 | 57380085  | 57381537  | 57384913  | 57386017  |
| 132 NA19240 | [2515685 chr4 | 4 | 69202095  | 69319814  | 117720 | 72  | 1.061905  | 0.022634 | 69201955  | 69202236  | 69319569  | 69320059  |
| 133 NA19240 | [2515685 chr4 | 4 | 69319814  | 69368480  | 48667  | 45  | 0.278996  | 0.017773 | 69319569  | 69320059  | 69365412  | 69382197  |
| 134 NA19240 | [2515685 chr4 | 4 | 69670832  | 69720490  | 49659  | 56  | 0.262262  | 0.016615 | 69670364  | 69671301  | 69717422  | 69734219  |
| 135 NA19240 | [2515685 chr4 | 4 | 70329154  | 70417223  | 88070  | 86  | 0.424112  | 0.016469 | 70328934  | 70329375  | 70416364  | 70418087  |
| 136 NA19240 | [2515685 chr4 | 4 | 87333407  | 87337560  | 4154   | 4   | -0.981714 | 0.081697 | 87333057  | 87333758  | 87337055  | 87338061  |
| 137 NA19240 | [2515685 chr4 | 4 | 92343585  | 92344675  | 1091   | 2   | -0.996634 | 0.126388 | 92343246  | 92343924  | 92344415  | 92344931  |
| 138 NA19240 | [2515685 chr4 | 4 | 112654875 | 112665626 | 10752  | 10  | -0.760041 | 0.050922 | 112654558 | 112655192 | 112665222 | 11266603  |
| 139 NA19240 | [2515685 chr4 | 4 | 115534208 | 115541546 | 7339   | 9   | -3.244805 | 0.103348 | 115530015 | 115537276 | 115539984 | 11554310  |
| 140 NA19240 | [2515685 chr4 | 4 | 119480818 | 119487782 | 6965   | 5   | -0.881791 | 0.068394 | 119473487 | 119483886 | 119487418 | 11948814  |
| 141 NA19240 | [2515685 chr4 | 4 | 132848421 | 132850721 | 2301   | 3   | -1.071615 | 0.096766 | 132847980 | 132848862 | 132850424 | 13285101. |
| 142 NA19240 | [2515685 chr4 | 4 | 133000684 | 133043320 | 42637  | 23  | 0.324498  | 0.022986 | 132999479 | 133001890 | 133042031 | 13304460  |
| 143 NA19240 | [2515685 chr4 | 4 | 133536190 | 133540723 | 4534   | 3   | -0.954133 | 0.102683 | 133531398 | 133539258 | 133540462 | 13354098  |
| 144 NA19240 | [2515685 chr4 | 4 | 138537751 | 138549906 | 12156  | 14  | 0.844585  | 0.045056 | 138537443 | 138538059 | 138547414 | 13855239  |
| 145 NA19240 | [2515685 chr4 | 4 | 138584392 | 138585710 | 1319   | 2   | -0.58611  | 0.106122 | 138584115 | 138584670 | 138585273 | 13858614  |
| 146 NA19240 | [2515685 chr4 | 4 | 142588136 | 142590500 | 2365   | 4   | -0.766272 | 0.079327 | 142587774 | 142588498 | 142590303 | 14259069  |
| 147 NA19240 | [2515685 chr4 | 4 | 145238696 | 145250378 | 11683  | 10  | -0.363469 | 0.048275 | 145236919 | 145240473 | 145250020 | 14525073  |
| 148 NA19240 | [2515685 chr4 | 4 | 152236495 | 152243015 | 6521   | 8   | -0.868843 | 0.055424 | 152231776 | 152239563 | 152241354 | 15224467  |
| 149 NA19240 | [2515685 chr4 | 4 | 162185314 | 162186247 | 934    | 2   | 0.668727  | 0.129953 | 162185095 | 162185534 | 162186003 | 16218649  |
| 150 NA19240 | [2515685 chr4 | 4 | 162237272 | 162242562 | 5291   | 8   | 0.877273  | 0.055095 | 162236487 | 162238058 | 162242381 | 16224274. |
| 151 NA19240 | [2515685 chr4 | 4 | 162312826 | 162313795 | 970    | 2   | 0.622212  | 0.114956 | 162312706 | 162312947 | 162314153 | 16231413  |
| 152 NA19240 | [2515685 chr4 | 4 | 162578301 | 162589922 | 11622  | 12  | -0.275961 | 0.041323 | 162577752 | 162578850 | 162589624 | 16259022  |
| 153 NA19240 | [2515685 chr4 | 4 | 169184442 | 169368370 | 183929 | 161 | 0.771961  | 0.01232  | 169184090 | 169184794 | 169366713 | 16937002  |
| 154 NA19240 | [2515685 chr4 | 4 | 173363594 | 173367718 | 4125   | 6   | -0.777824 | 0.062851 | 173362583 | 173364606 | 173367283 | 17336815  |
| 155 NA19240 | [2515685 chr4 | 4 | 173799832 | 173807323 | 7492   | 6   | 0.893907  | 0.069473 | 173799464 | 173800201 | 173804255 | 17381134  |
| 156 NA19240 | [2515685 chr4 | 4 | 178750399 | 178761484 | 11086  | 14  | -0.829985 | 0.041555 | 178749967 | 178750832 | 178760588 | 17876238  |
| 157 NA19240 | [2515685 chr4 | 4 | 181510330 | 181513372 | 3043   | 4   | -0.767745 | 0.083348 | 181509772 | 181510889 | 181513067 | 18151367  |

|             |               |   |           |           |        |     |           |          |           |           |           |           |
|-------------|---------------|---|-----------|-----------|--------|-----|-----------|----------|-----------|-----------|-----------|-----------|
| 158 NA19240 | [2515685 chr4 | 4 | 185533276 | 185544849 | 11574  | 12  | 0.879608  | 0.046478 | 185532696 | 185533857 | 185543276 | 18554642  |
| 159 NA19240 | [2515685 chr4 | 4 | 186816666 | 186818988 | 2323   | 3   | 4.717945  | 0.235421 | 186816420 | 186816912 | 186818307 | 18681967  |
| 160 NA19240 | [2515685 chr4 | 4 | 187728494 | 187732907 | 4414   | 15  | 1.784656  | 0.04977  | 187728193 | 187728795 | 187732541 | 18773327  |
| 161 NA19240 | [2515685 chr4 | 4 | 189799455 | 189807562 | 8108   | 11  | -0.434602 | 0.043978 | 189799180 | 189799730 | 189807064 | 18980806  |
| 162 NA19240 | [2515685 chr4 | 4 | 190528602 | 190533163 | 4562   | 21  | -2.241938 | 0.0433   | 190528058 | 190529146 | 190531664 | 19053466  |
| 163 NA19240 | [2515685 chr4 | 4 | 190845771 | 191059687 | 213917 | 220 | 0.317484  | 0.009712 | 190845056 | 190846486 | 191059242 | 19106013  |
| 164 NA19240 | [2515685 chr5 | 5 | 153687    | 155672    | 1986   | 3   | 0.946457  | 0.086711 | 153444    | 153930    | 155274    | 156071    |
| 165 NA19240 | [2515685 chr5 | 5 | 261631    | 263283    | 1653   | 9   | 0.591053  | 0.053431 | 261032    | 262230    | 262766    | 263801    |
| 166 NA19240 | [2515685 chr5 | 5 | 263283    | 267007    | 3725   | 13  | -0.291235 | 0.039862 | 262766    | 263801    | 266353    | 267662    |
| 167 NA19240 | [2515685 chr5 | 5 | 520743    | 521684    | 942    | 5   | 0.669314  | 0.074475 | 520428    | 521059    | 521427    | 521942    |
| 168 NA19240 | [2515685 chr5 | 5 | 731032    | 902652    | 171621 | 158 | 0.379778  | 0.011004 | 730880    | 731185    | 902127    | 903178    |
| 169 NA19240 | [2515685 chr5 | 5 | 931723    | 935658    | 3936   | 4   | 0.363082  | 0.06363  | 931199    | 932248    | 934564    | 936753    |
| 170 NA19240 | [2515685 chr5 | 5 | 948969    | 953016    | 4048   | 13  | -0.423654 | 0.030383 | 948182    | 949756    | 952851    | 953182    |
| 171 NA19240 | [2515685 chr5 | 5 | 1122995   | 1126517   | 3523   | 38  | 0.544173  | 0.01881  | 1122772   | 1123219   | 1126389   | 1126646   |
| 172 NA19240 | [2515685 chr5 | 5 | 1223248   | 1223930   | 683    | 5   | 0.37887   | 0.053427 | 1223057   | 1223439   | 1223854   | 1224007   |
| 173 NA19240 | [2515685 chr5 | 5 | 17550023  | 17552132  | 2110   | 4   | 0.388948  | 0.063807 | 17549646  | 17550401  | 17551804  | 17552461  |
| 174 NA19240 | [2515685 chr5 | 5 | 17570617  | 17643104  | 72488  | 331 | 0.532474  | 0.006517 | 17570551  | 17570684  | 17642455  | 17643756  |
| 175 NA19240 | [2515685 chr5 | 5 | 17663728  | 17667407  | 3680   | 8   | 0.468088  | 0.045597 | 17663473  | 17663984  | 17667174  | 1766764   |
| 176 NA19240 | [2515685 chr5 | 5 | 21483394  | 21488147  | 4754   | 4   | -0.876915 | 0.074431 | 21480817  | 21485972  | 21487855  | 21488431  |
| 177 NA19240 | [2515685 chr5 | 5 | 26504372  | 26632918  | 128547 | 2   | -0.45178  | 0.087491 | 26404571  | 26507564  | 26629726  | 26769791  |
| 178 NA19240 | [2515685 chr5 | 5 | 26831997  | 26835654  | 3658   | 3   | -2.66099  | 0.14494  | 26829858  | 26834136  | 26835377  | 26835931  |
| 179 NA19240 | [2515685 chr5 | 5 | 26836459  | 26837938  | 1480   | 2   | -3.150184 | 0.295192 | 26835932  | 26836987  | 26837469  | 26838401  |
| 180 NA19240 | [2515685 chr5 | 5 | 57359558  | 57369858  | 10301  | 9   | 2.146546  | 0.077148 | 57359213  | 57359904  | 57367789  | 57371921  |
| 181 NA19240 | [2515685 chr5 | 5 | 61547004  | 61586964  | 39961  | 37  | 0.330743  | 0.023123 | 61546192  | 61547816  | 61586109  | 61587811  |
| 182 NA19240 | [2515685 chr5 | 5 | 61783743  | 61785396  | 1654   | 3   | -0.75842  | 0.084193 | 61783295  | 61784192  | 61784900  | 61785891  |
| 183 NA19240 | [2515685 chr5 | 5 | 68865200  | 68948510  | 83311  | 153 | 0.349474  | 0.011075 | 68864770  | 68865630  | 68948219  | 68948801  |
| 184 NA19240 | [2515685 chr5 | 5 | 69320113  | 69447482  | 127370 | 148 | 0.302535  | 0.009606 | 69319633  | 69320593  | 69446320  | 69448641  |
| 185 NA19240 | [2515685 chr5 | 5 | 69463749  | 69464161  | 413    | 2   | -0.571027 | 0.099343 | 69463497  | 69464001  | 69464004  | 69464311  |
| 186 NA19240 | [2515685 chr5 | 5 | 69741138  | 69742254  | 1117   | 2   | 0.753488  | 0.10209  | 69740930  | 69741346  | 69741639  | 69742871  |
| 187 NA19240 | [2515685 chr5 | 5 | 70195200  | 70447838  | 252639 | 345 | 0.292154  | 0.006723 | 70194720  | 70195680  | 70446675  | 70449001  |
| 188 NA19240 | [2515685 chr5 | 5 | 70464063  | 70464475  | 413    | 2   | -0.571027 | 0.099343 | 70463811  | 70464315  | 70464318  | 70464631  |
| 189 NA19240 | [2515685 chr5 | 5 | 80062599  | 80063554  | 956    | 2   | 0.681182  | 0.104208 | 80062244  | 80062954  | 80063286  | 80063821  |
| 190 NA19240 | [2515685 chr5 | 5 | 81459213  | 81466055  | 6843   | 2   | -1.537865 | 0.127922 | 81455614  | 81462405  | 81462863  | 81470281  |
| 191 NA19240 | [2515685 chr5 | 5 | 93928460  | 93931722  | 3263   | 3   | -0.55584  | 0.090332 | 93927706  | 93929215  | 93931460  | 93931981  |
| 192 NA19240 | [2515685 chr5 | 5 | 97427204  | 97428353  | 1150   | 2   | 0.990049  | 0.116963 | 97426913  | 97427496  | 97428177  | 97428521  |
| 193 NA19240 | [2515685 chr5 | 5 | 98692416  | 98694362  | 1947   | 3   | 0.59307   | 0.083013 | 98691745  | 98693087  | 98694014  | 98694711  |
| 194 NA19240 | [2515685 chr5 | 5 | 99409393  | 99419037  | 9645   | 13  | -0.517823 | 0.041707 | 99408997  | 99409789  | 99418328  | 99419741  |
| 195 NA19240 | [2515685 chr5 | 5 | 122649189 | 122651412 | 2224   | 3   | -1.289301 | 0.100456 | 122648933 | 122649446 | 122650032 | 12265279  |
| 196 NA19240 | [2515685 chr5 | 5 | 137835848 | 137844134 | 8287   | 7   | 0.657111  | 0.060362 | 137835611 | 137836085 | 137843310 | 137844951 |
| 197 NA19240 | [2515685 chr5 | 5 | 140203081 | 140217091 | 14011  | 18  | 2.496846  | 0.061718 | 140202344 | 140203819 | 140216552 | 140217631 |
| 198 NA19240 | [2515685 chr5 | 5 | 140217091 | 140218928 | 1838   | 2   | 0.99265   | 0.113371 | 140216552 | 140217631 | 140218508 | 14021934  |
| 199 NA19240 | [2515685 chr5 | 5 | 140511984 | 140517184 | 5201   | 7   | -0.92525  | 0.059642 | 140511547 | 140512422 | 140516955 | 140517411 |
| 200 NA19240 | [2515685 chr5 | 5 | 150157909 | 150161837 | 3929   | 6   | -0.779817 | 0.068225 | 150157286 | 150158532 | 150161621 | 150162051 |
| 201 NA19240 | [2515685 chr5 | 5 | 150183322 | 150203144 | 19823  | 10  | -0.760818 | 0.051651 | 150181427 | 150185218 | 150202838 | 150203451 |
| 202 NA19240 | [2515685 chr5 | 5 | 165157996 | 165161604 | 3609   | 2   | -0.75277  | 0.118509 | 165155280 | 165160712 | 165160802 | 165162401 |
| 203 NA19240 | [2515685 chr5 | 5 | 171934884 | 171936441 | 1558   | 2   | 0.599762  | 0.118458 | 171934518 | 171935250 | 171936176 | 171936701 |
| 204 NA19240 | [2515685 chr5 | 5 | 175391658 | 175393797 | 2140   | 7   | -0.333004 | 0.061183 | 175391228 | 175392088 | 175393522 | 175394071 |
| 205 NA19240 | [2515685 chr5 | 5 | 178875137 | 178876641 | 1505   | 2   | 0.544375  | 0.096012 | 178874878 | 178875396 | 178875938 | 178877341 |
| 206 NA19240 | [2515685 chr6 | 6 | 3163      | 18689     | 15527  | 4   | 0.386567  | 0.068975 | 1         | 6325      | 15669     | 21709     |
| 207 NA19240 | [2515685 chr6 | 6 | 201167    | 327656    | 126490 | 130 | 0.282552  | 0.012474 | 200920    | 201415    | 326993    | 328326    |
| 208 NA19240 | [2515685 chr6 | 6 | 26847749  | 26853974  | 6226   | 9   | 0.435554  | 0.049898 | 26846249  | 26849250  | 26853770  | 26854171  |
| 209 NA19240 | [2515685 chr6 | 6 | 29756258  | 29759142  | 2885   | 2   | 0.848304  | 0.121772 | 29756030  | 29756486  | 29757123  | 29761161  |
| 210 NA19240 | [2515685 chr6 | 6 | 29804635  | 29899270  | 94636  | 7   | 0.356056  | 0.054201 | 29800552  | 29808139  | 29896442  | 29902091  |
| 211 NA19240 | [2515685 chr6 | 6 | 29954251  | 30038916  | 84666  | 76  | 0.419611  | 0.014098 | 29950833  | 29957670  | 30036708  | 30041121  |
| 212 NA19240 | [2515685 chr6 | 6 | 30051460  | 30068966  | 17507  | 26  | 0.419611  | 0.014098 | 30051232  | 30051688  | 30068538  | 30069391  |



|             |               |   |           |           |        |     |           |          |           |           |           |          |
|-------------|---------------|---|-----------|-----------|--------|-----|-----------|----------|-----------|-----------|-----------|----------|
| 213 NA19240 | [2515685 chr6 | 6 | 32557126  | 32681799  | 124674 | 106 | 0.313838  | 0.011712 | 32556948  | 32557305  | 32680956  | 3268264; |
| 214 NA19240 | [2515685 chr6 | 6 | 32712337  | 32744343  | 32007  | 37  | 0.313838  | 0.011712 | 32712193  | 32712482  | 32744136  | 32744550 |
| 215 NA19240 | [2515685 chr6 | 6 | 32763698  | 32766771  | 3074   | 4   | -0.383506 | 0.070646 | 32763421  | 32763976  | 32766412  | 32767130 |
| 216 NA19240 | [2515685 chr6 | 6 | 32796525  | 32801824  | 5300   | 7   | -0.35035  | 0.054607 | 32796355  | 32796695  | 32801628  | 32802027 |
| 217 NA19240 | [2515685 chr6 | 6 | 32802179  | 32804370  | 2192   | 2   | 1.109183  | 0.118101 | 32802021  | 32802337  | 32802724  | 32806010 |
| 218 NA19240 | [2515685 chr6 | 6 | 35862833  | 35874426  | 11594  | 13  | 0.754295  | 0.04059  | 35862530  | 35863136  | 35873957  | 35874891 |
| 219 NA19240 | [2515685 chr6 | 6 | 54036900  | 54042384  | 5485   | 5   | 4.043294  | 0.152277 | 54036573  | 54037227  | 54041771  | 54042991 |
| 220 NA19240 | [2515685 chr6 | 6 | 58372782  | 58377266  | 4485   | 8   | -0.252597 | 0.047105 | 58372711  | 58372853  | 58376979  | 5837755- |
| 221 NA19240 | [2515685 chr6 | 6 | 62338497  | 62343650  | 5154   | 2   | -0.657471 | 0.10391  | 62334618  | 62342001  | 62342340  | 62344967 |
| 222 NA19240 | [2515685 chr6 | 6 | 68551595  | 68555952  | 4358   | 5   | -0.339864 | 0.066929 | 68551347  | 68551844  | 68555667  | 68556237 |
| 223 NA19240 | [2515685 chr6 | 6 | 77495034  | 77513515  | 18482  | 12  | 0.722646  | 0.04726  | 77493568  | 77496500  | 77510011  | 77517691 |
| 224 NA19240 | [2515685 chr6 | 6 | 78326767  | 78328478  | 1712   | 2   | -0.688013 | 0.093547 | 78325974  | 78327560  | 78328067  | 78328880 |
| 225 NA19240 | [2515685 chr6 | 6 | 78934834  | 78953038  | 18205  | 13  | -0.829121 | 0.042336 | 78934474  | 78935195  | 78949534  | 78962007 |
| 226 NA19240 | [2515685 chr6 | 6 | 79023318  | 79093263  | 69946  | 70  | 0.74115   | 0.018454 | 79022028  | 79024609  | 79091909  | 79094610 |
| 227 NA19240 | [2515685 chr6 | 6 | 102041093 | 102046055 | 4963   | 6   | -0.919897 | 0.066368 | 102040642 | 102041544 | 102045198 | 10204691 |
| 228 NA19240 | [2515685 chr6 | 6 | 103844685 | 103871201 | 26517  | 17  | 2.400928  | 0.068082 | 103844347 | 103845023 | 103868241 | 10387416 |
| 229 NA19240 | [2515685 chr6 | 6 | 120671191 | 120671916 | 726    | 2   | 0.858288  | 0.103241 | 120670696 | 120671686 | 120671725 | 12067210 |
| 230 NA19240 | [2515685 chr6 | 6 | 162821530 | 162823040 | 1511   | 2   | -0.792125 | 0.10364  | 162821109 | 162821951 | 162822743 | 16282333 |
| 231 NA19240 | [2515685 chr6 | 6 | 168451982 | 168456762 | 4781   | 4   | -0.577627 | 0.071484 | 168451353 | 168452611 | 168456200 | 16845732 |
| 232 NA19240 | [2515685 chr6 | 6 | 170603879 | 170604666 | 788    | 2   | -2.457092 | 0.133668 | 170603541 | 170604217 | 170604339 | 17060499 |
| 233 NA19240 | [2515685 chr6 | 6 | 170625506 | 170627028 | 1523   | 3   | 1.918577  | 0.127865 | 170625015 | 170625997 | 170626579 | 17062747 |
| 234 NA19240 | [2515685 chr7 | 7 | 10841125  | 1088166   | 4042   | 16  | 0.535677  | 0.036083 | 1083752   | 1084499   | 1087449   | 1088830  |
| 235 NA19240 | [2515685 chr7 | 7 | 3384111   | 3392458   | 8348   | 8   | 0.835657  | 0.056415 | 3383451   | 3384772   | 3390107   | 3395610  |
| 236 NA19240 | [2515685 chr7 | 7 | 4687170   | 4776122   | 88953  | 2   | -0.622627 | 0.080729 | 4575528   | 4689521   | 4773771   | 4859830  |
| 237 NA19240 | [2515685 chr7 | 7 | 14861623  | 14866192  | 4570   | 3   | -1.040878 | 0.095272 | 14860212  | 14863034  | 14864375  | 14868000 |
| 238 NA19240 | [2515685 chr7 | 7 | 18626912  | 18629955  | 3044   | 4   | -0.373042 | 0.073563 | 18626529  | 18627295  | 18629529  | 1863038  |
| 239 NA19240 | [2515685 chr7 | 7 | 19395816  | 19403726  | 7911   | 3   | -0.685012 | 0.0927   | 19393767  | 19397866  | 19401375  | 1945566  |
| 240 NA19240 | [2515685 chr7 | 7 | 43773800  | 43856045  | 82246  | 110 | 0.40807   | 0.012159 | 43773256  | 43774344  | 43853730  | 43858360 |
| 241 NA19240 | [2515685 chr7 | 7 | 53223889  | 53225898  | 2010   | 3   | -0.508821 | 0.084284 | 53223343  | 53224435  | 53225511  | 53226280 |
| 242 NA19240 | [2515685 chr7 | 7 | 56415682  | 56544240  | 128559 | 4   | -0.668019 | 0.071693 | 56286086  | 56418033  | 56542365  | 56546111 |
| 243 NA19240 | [2515685 chr7 | 7 | 57693448  | 57724533  | 31086  | 64  | 0.250494  | 0.017738 | 57693264  | 57693633  | 57723811  | 57725250 |
| 244 NA19240 | [2515685 chr7 | 7 | 63995985  | 64009675  | 13691  | 16  | 0.330191  | 0.037048 | 63995676  | 63996294  | 64009043  | 64010307 |
| 245 NA19240 | [2515685 chr7 | 7 | 64029672  | 64045487  | 15816  | 45  | -0.334145 | 0.020984 | 64029291  | 64030053  | 64045069  | 64045900 |
| 246 NA19240 | [2515685 chr7 | 7 | 64464087  | 64479903  | 15817  | 43  | -0.295352 | 0.021667 | 64463669  | 64464506  | 64479522  | 64480280 |
| 247 NA19240 | [2515685 chr7 | 7 | 64540847  | 64556662  | 15816  | 45  | -0.323506 | 0.02082  | 64540466  | 64541228  | 64556244  | 64557080 |
| 248 NA19240 | [2515685 chr7 | 7 | 64690171  | 64725545  | 35375  | 39  | 0.401776  | 0.022711 | 64689761  | 64690582  | 64725209  | 64725880 |
| 249 NA19240 | [2515685 chr7 | 7 | 66185764  | 66203252  | 17489  | 35  | 0.270235  | 0.019684 | 66185376  | 66186152  | 66202563  | 66203947 |
| 250 NA19240 | [2515685 chr7 | 7 | 69866390  | 69869623  | 3234   | 4   | 1.126404  | 0.085706 | 69865412  | 69867368  | 69869269  | 69869970 |
| 251 NA19240 | [2515685 chr7 | 7 | 69869623  | 69871056  | 1434   | 2   | 4.053206  | 0.200849 | 69869269  | 69869978  | 69870420  | 69871691 |
| 252 NA19240 | [2515685 chr7 | 7 | 71775031  | 71786841  | 11811  | 28  | 0.261695  | 0.022825 | 71773381  | 71776681  | 71786776  | 71786900 |
| 253 NA19240 | [2515685 chr7 | 7 | 71935395  | 71940886  | 5492   | 18  | 0.306134  | 0.025028 | 71935177  | 71935613  | 71940710  | 71941060 |
| 254 NA19240 | [2515685 chr7 | 7 | 71963457  | 71968948  | 5492   | 17  | 0.303441  | 0.025779 | 71963239  | 71963675  | 71968772  | 71969120 |
| 255 NA19240 | [2515685 chr7 | 7 | 73917034  | 73918196  | 1163   | 2   | 0.561706  | 0.094591 | 73917029  | 73917040  | 73917270  | 73919120 |
| 256 NA19240 | [2515685 chr7 | 7 | 73965656  | 73966691  | 1036   | 4   | 0.42775   | 0.070375 | 73965279  | 73966033  | 73966513  | 73966870 |
| 257 NA19240 | [2515685 chr7 | 7 | 74417518  | 74418680  | 1163   | 2   | 0.561705  | 0.094591 | 74416593  | 74418444  | 74418675  | 74418680 |
| 258 NA19240 | [2515685 chr7 | 7 | 74557218  | 74562728  | 5511   | 19  | 0.300251  | 0.024338 | 74557021  | 74557415  | 74562510  | 74562940 |
| 259 NA19240 | [2515685 chr7 | 7 | 74585259  | 74590751  | 5493   | 19  | 0.300251  | 0.024338 | 74585083  | 74585435  | 74590533  | 74590960 |
| 260 NA19240 | [2515685 chr7 | 7 | 74613282  | 74618770  | 5489   | 19  | 0.300251  | 0.024338 | 74613106  | 74613458  | 74618552  | 74618980 |
| 261 NA19240 | [2515685 chr7 | 7 | 74765926  | 74783402  | 17477  | 41  | 0.2546    | 0.019541 | 74765530  | 74766323  | 74782714  | 74784090 |
| 262 NA19240 | [2515685 chr7 | 7 | 75790452  | 75794984  | 4533   | 5   | -0.536797 | 0.068579 | 75790248  | 75790656  | 75794325  | 75795640 |
| 263 NA19240 | [2515685 chr7 | 7 | 75800166  | 75817580  | 17415  | 39  | 0.251821  | 0.019165 | 75799479  | 75800854  | 75817188  | 75817970 |
| 264 NA19240 | [2515685 chr7 | 7 | 76173835  | 76175647  | 1813   | 2   | 0.604829  | 0.101408 | 76173564  | 76174106  | 76174852  | 76176440 |
| 265 NA19240 | [2515685 chr7 | 7 | 76336326  | 76338655  | 2330   | 4   | 0.592991  | 0.069774 | 76336153  | 76336500  | 76338090  | 76339220 |
| 266 NA19240 | [2515685 chr7 | 7 | 86392789  | 86394206  | 1418   | 2   | 0.756365  | 0.115347 | 86392392  | 86393187  | 86393827  | 86394580 |
| 267 NA19240 | [2515685 chr7 | 7 | 89455106  | 89456027  | 922    | 2   | 0.862668  | 0.124274 | 89454839  | 89455373  | 89455830  | 89456220 |

|             |               |   |           |           |        |     |           |          |           |           |           |          |
|-------------|---------------|---|-----------|-----------|--------|-----|-----------|----------|-----------|-----------|-----------|----------|
| 268 NA19240 | [2515685 chr7 | 7 | 101575355 | 101591961 | 16607  | 40  | 0.275838  | 0.019141 | 101575283 | 101575428 | 101591559 | 10159236 |
| 269 NA19240 | [2515685 chr7 | 7 | 101706884 | 101925433 | 218550 | 313 | 0.44601   | 0.006736 | 101690888 | 101709235 | 101924670 | 10192619 |
| 270 NA19240 | [2515685 chr7 | 7 | 104058651 | 104070743 | 12093  | 11  | -0.780744 | 0.048615 | 104057855 | 104059447 | 104070406 | 10407108 |
| 271 NA19240 | [2515685 chr7 | 7 | 109034783 | 109046722 | 11940  | 9   | 2.230307  | 0.083709 | 109024063 | 109037134 | 109046491 | 10904695 |
| 272 NA19240 | [2515685 chr7 | 7 | 109776378 | 109782655 | 6278   | 5   | 0.689768  | 0.074373 | 109775821 | 109776936 | 109782301 | 10978301 |
| 273 NA19240 | [2515685 chr7 | 7 | 125639507 | 125644775 | 5269   | 6   | -0.846252 | 0.074516 | 125639054 | 125639961 | 125644046 | 12564550 |
| 274 NA19240 | [2515685 chr7 | 7 | 126108382 | 126124547 | 16166  | 25  | -0.253274 | 0.028183 | 126107861 | 126108904 | 126124499 | 12612459 |
| 275 NA19240 | [2515685 chr7 | 7 | 133243381 | 133245202 | 1822   | 2   | 0.811968  | 0.10891  | 133243008 | 133243755 | 133244207 | 13324619 |
| 276 NA19240 | [2515685 chr7 | 7 | 133245202 | 133257360 | 12159  | 13  | 3.069958  | 0.080431 | 133244207 | 133246197 | 133255009 | 13326093 |
| 277 NA19240 | [2515685 chr7 | 7 | 141495319 | 141505136 | 9818   | 12  | -0.331054 | 0.039629 | 141494721 | 141495918 | 141504428 | 14150584 |
| 278 NA19240 | [2515685 chr7 | 7 | 141505136 | 141521152 | 16017  | 19  | -1.431261 | 0.048026 | 141504428 | 141505844 | 141520892 | 14152141 |
| 279 NA19240 | [2515685 chr7 | 7 | 141521152 | 141526577 | 5426   | 9   | -0.293478 | 0.043679 | 141520892 | 141521412 | 141526109 | 14152704 |
| 280 NA19240 | [2515685 chr7 | 7 | 143346910 | 143348067 | 1158   | 4   | -0.501481 | 0.070445 | 143346704 | 143347116 | 143348706 | 14334832 |
| 281 NA19240 | [2515685 chr7 | 7 | 143472403 | 143473560 | 1158   | 4   | -0.501482 | 0.070445 | 143472142 | 143472664 | 143473355 | 14347376 |
| 282 NA19240 | [2515685 chr7 | 7 | 156976112 | 156978464 | 2353   | 2   | -0.825933 | 0.105181 | 156975812 | 156976413 | 156977896 | 15697903 |
| 283 NA19240 | [2515685 chr7 | 7 | 157023614 | 157027930 | 4317   | 7   | 0.307018  | 0.055499 | 157023242 | 157023987 | 157027451 | 15702840 |
| 284 NA19240 | [2515685 chr7 | 7 | 158207288 | 158209880 | 2593   | 2   | 0.631547  | 0.11539  | 158206344 | 158208233 | 158209333 | 15821042 |
| 285 NA19240 | [2515685 chr7 | 7 | 158617060 | 158624379 | 7320   | 6   | 0.751317  | 0.066293 | 158617673 | 158617357 | 158622028 | 15862673 |
| 286 NA19240 | [2515685 chr8 | 8 | 1328256   | 1343509   | 15254  | 45  | -0.840211 | 0.020971 | 1327688   | 1328824   | 1342795   | 1344224  |
| 287 NA19240 | [2515685 chr8 | 8 | 2202770   | 2204550   | 1781   | 4   | 0.36182   | 0.06151  | 2202506   | 2203034   | 2203659   | 2205447  |
| 288 NA19240 | [2515685 chr8 | 8 | 3976481   | 3979237   | 2757   | 2   | -0.654157 | 0.10106  | 3975997   | 3976965   | 3978503   | 3979972  |
| 289 NA19240 | [2515685 chr8 | 8 | 4110204   | 4112526   | 2323   | 2   | 2.79773   | 0.188536 | 4109692   | 4110717   | 4112031   | 4113022  |
| 290 NA19240 | [2515685 chr8 | 8 | 5582875   | 5594011   | 11137  | 9   | 0.886132  | 0.047922 | 5582615   | 5583135   | 5592820   | 5595203  |
| 291 NA19240 | [2515685 chr8 | 8 | 5863204   | 5865192   | 1989   | 2   | 0.598634  | 0.098419 | 5862948   | 5863461   | 5864505   | 5865875  |
| 292 NA19240 | [2515685 chr8 | 8 | 7149385   | 7153299   | 3915   | 5   | -0.518234 | 0.065343 | 7149228   | 7149542   | 7153193   | 7153405  |
| 293 NA19240 | [2515685 chr8 | 8 | 7176337   | 7187950   | 11614  | 31  | 0.776546  | 0.027565 | 7176045   | 7176630   | 7187698   | 7188202  |
| 294 NA19240 | [2515685 chr8 | 8 | 7206074   | 7207633   | 1560   | 4   | -0.606938 | 0.071823 | 7205579   | 7206570   | 7207477   | 7207785  |
| 295 NA19240 | [2515685 chr8 | 8 | 7223627   | 7262126   | 38500  | 42  | -0.3654   | 0.022609 | 7223006   | 7224249   | 7261726   | 7262525  |
| 296 NA19240 | [2515685 chr8 | 8 | 7309865   | 7312941   | 3077   | 8   | -0.359107 | 0.045869 | 7309574   | 7310156   | 7312731   | 7313152  |
| 297 NA19240 | [2515685 chr8 | 8 | 7316729   | 7362554   | 45826  | 63  | -0.329181 | 0.018018 | 7316506   | 7316953   | 7362067   | 7363042  |
| 298 NA19240 | [2515685 chr8 | 8 | 7395422   | 7396151   | 730    | 2   | -1.239952 | 0.090091 | 7395245   | 7395599   | 7396137   | 7396165  |
| 299 NA19240 | [2515685 chr8 | 8 | 7698324   | 7734206   | 35883  | 61  | -0.350493 | 0.017985 | 7697837   | 7698812   | 7733955   | 7734457  |
| 300 NA19240 | [2515685 chr8 | 8 | 7792001   | 7811861   | 19861  | 14  | -0.359713 | 0.039214 | 7791682   | 7792321   | 7811662   | 7812065  |
| 301 NA19240 | [2515685 chr8 | 8 | 7862281   | 7873897   | 11617  | 32  | 0.766422  | 0.026175 | 7862030   | 7862533   | 7873605   | 7874190  |
| 302 NA19240 | [2515685 chr8 | 8 | 7896933   | 7898659   | 1727   | 3   | -0.635888 | 0.078159 | 7896828   | 7897039   | 7897534   | 7899784  |
| 303 NA19240 | [2515685 chr8 | 8 | 12020137  | 12023134  | 2998   | 4   | -0.409819 | 0.076085 | 12018164  | 12022111  | 12022997  | 12023272 |
| 304 NA19240 | [2515685 chr8 | 8 | 12023134  | 12035286  | 12153  | 32  | 0.779857  | 0.027242 | 1202297   | 12023272  | 12034973  | 12035599 |
| 305 NA19240 | [2515685 chr8 | 8 | 12035286  | 12037147  | 1862   | 4   | -0.411237 | 0.069974 | 12034973  | 12035599  | 12037108  | 12037181 |
| 306 NA19240 | [2515685 chr8 | 8 | 12044303  | 12062652  | 18350  | 31  | -0.397959 | 0.022306 | 12042872  | 12045734  | 12062266  | 12063031 |
| 307 NA19240 | [2515685 chr8 | 8 | 12072445  | 12072888  | 444    | 2   | -0.572628 | 0.096478 | 12072267  | 12072623  | 12072625  | 12073151 |
| 308 NA19240 | [2515685 chr8 | 8 | 12276602  | 12284041  | 7440   | 14  | 0.704937  | 0.037444 | 12276206  | 12276998  | 12283622  | 12284461 |
| 309 NA19240 | [2515685 chr8 | 8 | 12296003  | 12311960  | 15958  | 26  | -0.4106   | 0.023676 | 12295662  | 12296344  | 12311547  | 12312372 |
| 310 NA19240 | [2515685 chr8 | 8 | 12321726  | 12322179  | 454    | 2   | -0.572628 | 0.096478 | 12321548  | 12321904  | 12321906  | 12322451 |
| 311 NA19240 | [2515685 chr8 | 8 | 14322307  | 14328254  | 5948   | 4   | -0.389724 | 0.070193 | 14321823  | 14322792  | 14327160  | 14329347 |
| 312 NA19240 | [2515685 chr8 | 8 | 17671955  | 17673956  | 2002   | 3   | 0.446619  | 0.073358 | 17671619  | 17672291  | 17673575  | 17674331 |
| 313 NA19240 | [2515685 chr8 | 8 | 20022286  | 20024771  | 2486   | 2   | -1.302968 | 0.13667  | 20021082  | 20023491  | 20024338  | 20025202 |
| 314 NA19240 | [2515685 chr8 | 8 | 21373922  | 21380771  | 6850   | 7   | -0.863278 | 0.050758 | 21373178  | 21374667  | 21380535  | 21381007 |
| 315 NA19240 | [2515685 chr8 | 8 | 25028407  | 25046468  | 18062  | 14  | -0.822409 | 0.039885 | 25027885  | 25028930  | 25046159  | 25046777 |
| 316 NA19240 | [2515685 chr8 | 8 | 39351178  | 39506673  | 155496 | 162 | 0.710533  | 0.012379 | 39350826  | 39351530  | 39505284  | 39508061 |
| 317 NA19240 | [2515685 chr8 | 8 | 49081430  | 49084499  | 3070   | 2   | -0.624996 | 0.106821 | 49079497  | 49083364  | 49084089  | 49084911 |
| 318 NA19240 | [2515685 chr8 | 8 | 54001807  | 54002677  | 871    | 2   | -0.981126 | 0.110232 | 54001673  | 54001942  | 54002470  | 54002881 |
| 319 NA19240 | [2515685 chr8 | 8 | 58278355  | 58287850  | 9496   | 8   | 0.94305   | 0.047944 | 58277116  | 58279595  | 58287616  | 58288081 |
| 320 NA19240 | [2515685 chr8 | 8 | 58287850  | 58296106  | 8257   | 9   | 0.328994  | 0.047328 | 58287616  | 58288084  | 58295669  | 58296541 |
| 321 NA19240 | [2515685 chr8 | 8 | 61158998  | 61170245  | 11248  | 15  | -0.774545 | 0.039573 | 61158589  | 61159407  | 61170054  | 61170431 |
| 322 NA19240 | [2515685 chr8 | 8 | 86742169  | 86910255  | 168087 | 98  | 0.6673    | 0.011676 | 86741757  | 86742581  | 86910002  | 86910505 |

|             |                |    |           |           |        |     |           |          |           |           |           |          |
|-------------|----------------|----|-----------|-----------|--------|-----|-----------|----------|-----------|-----------|-----------|----------|
| 323 NA19240 | [2515685 chr8  | 8  | 102689939 | 102695510 | 5572   | 5   | -0.849825 | 0.068618 | 102689349 | 102690530 | 102694979 | 10269604 |
| 324 NA19240 | [2515685 chr8  | 8  | 115148105 | 115149916 | 1812   | 2   | -0.874358 | 0.122704 | 115147694 | 115148517 | 115149348 | 11515048 |
| 325 NA19240 | [2515685 chr8  | 8  | 120089066 | 120093850 | 4785   | 3   | -0.799473 | 0.090804 | 120088183 | 120089950 | 120091092 | 12009873 |
| 326 NA19240 | [2515685 chr8  | 8  | 120222656 | 120229952 | 7297   | 6   | 0.752878  | 0.061911 | 120218251 | 120225414 | 120229434 | 12023047 |
| 327 NA19240 | [2515685 chr9  | 9  | 310045    | 312573    | 2529   | 61  | -0.811495 | 0.01662  | 309952    | 310139    | 312740    | 312740   |
| 328 NA19240 | [2515685 chr9  | 9  | 505204    | 518415    | 13212  | 11  | -0.876246 | 0.051797 | 504417    | 505991    | 516633    | 520198   |
| 329 NA19240 | [2515685 chr9  | 9  | 632102    | 637922    | 5821   | 7   | -1.694191 | 0.070111 | 631710    | 632495    | 637447    | 638398   |
| 330 NA19240 | [2515685 chr9  | 9  | 38899810  | 38900502  | 693    | 2   | 0.719297  | 0.096024 | 38899653  | 38899968  | 38899981  | 3890102  |
| 331 NA19240 | [2515685 chr9  | 9  | 39017383  | 39048612  | 31230  | 49  | -0.396111 | 0.019741 | 39017085  | 39017681  | 39048196  | 3904902  |
| 332 NA19240 | [2515685 chr9  | 9  | 39813768  | 39815652  | 1885   | 3   | -0.561859 | 0.075897 | 39813502  | 39814035  | 39814733  | 3981657  |
| 333 NA19240 | [2515685 chr9  | 9  | 40054064  | 40086216  | 32153  | 38  | -0.408713 | 0.02207  | 40053762  | 40054366  | 40085706  | 4008672  |
| 334 NA19240 | [2515685 chr9  | 9  | 40770208  | 40770735  | 528    | 2   | -0.639529 | 0.093378 | 40769961  | 40770456  | 40770491  | 4077097  |
| 335 NA19240 | [2515685 chr9  | 9  | 41049812  | 41132490  | 82679  | 56  | -0.286459 | 0.018254 | 41049110  | 41050515  | 41132444  | 4113253  |
| 336 NA19240 | [2515685 chr9  | 9  | 41193344  | 41199633  | 6290   | 5   | 0.57114   | 0.067671 | 41193015  | 41193673  | 41199476  | 4119979  |
| 337 NA19240 | [2515685 chr9  | 9  | 41649237  | 41651122  | 1886   | 3   | -0.56186  | 0.075897 | 41648318  | 41650157  | 41650855  | 4165138  |
| 338 NA19240 | [2515685 chr9  | 9  | 41985505  | 41985880  | 376    | 2   | -0.474705 | 0.087703 | 41985322  | 41985689  | 41985750  | 4198601  |
| 339 NA19240 | [2515685 chr9  | 9  | 42608793  | 42611140  | 2348   | 5   | -0.377353 | 0.050976 | 42608500  | 42609086  | 42611052  | 4261122  |
| 340 NA19240 | [2515685 chr9  | 9  | 42645007  | 42646038  | 1032   | 2   | -0.505991 | 0.083745 | 42644851  | 42645163  | 42645769  | 4264630  |
| 341 NA19240 | [2515685 chr9  | 9  | 42669198  | 42670938  | 1741   | 2   | -0.49729  | 0.073814 | 42668921  | 42669475  | 42670652  | 4267122  |
| 342 NA19240 | [2515685 chr9  | 9  | 42732181  | 42734581  | 2401   | 2   | -0.501593 | 0.073813 | 42731862  | 42732501  | 42733955  | 4273520  |
| 343 NA19240 | [2515685 chr9  | 9  | 42754727  | 42756705  | 1979   | 3   | -0.719005 | 0.068887 | 42754385  | 42755070  | 42755767  | 4275764  |
| 344 NA19240 | [2515685 chr9  | 9  | 42789875  | 42791615  | 1741   | 2   | -0.49729  | 0.073814 | 42789598  | 42790152  | 42791329  | 4279190  |
| 345 NA19240 | [2515685 chr9  | 9  | 42852857  | 42855257  | 2401   | 2   | -0.501597 | 0.073814 | 42852538  | 42853177  | 42854631  | 4285588  |
| 346 NA19240 | [2515685 chr9  | 9  | 42875403  | 42877381  | 1979   | 3   | -0.719007 | 0.068887 | 42875061  | 42875746  | 42876443  | 4287832  |
| 347 NA19240 | [2515685 chr9  | 9  | 43065211  | 43066832  | 1622   | 2   | -0.940423 | 0.108178 | 43064261  | 43066162  | 43066646  | 4306701  |
| 348 NA19240 | [2515685 chr9  | 9  | 43182769  | 43194482  | 11714  | 21  | -0.385619 | 0.032857 | 43179223  | 43185134  | 43194192  | 4319477  |
| 349 NA19240 | [2515685 chr9  | 9  | 43480912  | 43484975  | 4064   | 4   | -0.390846 | 0.076377 | 43478265  | 43483277  | 43484786  | 4348516  |
| 350 NA19240 | [2515685 chr9  | 9  | 43632304  | 43634386  | 2083   | 4   | -0.381012 | 0.053511 | 43632011  | 43632597  | 43634033  | 4363473  |
| 351 NA19240 | [2515685 chr9  | 9  | 43720039  | 43721070  | 1032   | 2   | -0.505991 | 0.083745 | 43719883  | 43720195  | 43720801  | 4372133  |
| 352 NA19240 | [2515685 chr9  | 9  | 43744237  | 43745976  | 1740   | 2   | -0.49729  | 0.073814 | 43743960  | 43744514  | 43745690  | 4374626  |
| 353 NA19240 | [2515685 chr9  | 9  | 43807800  | 43810310  | 2511   | 3   | -1.202995 | 0.095757 | 43807212  | 43808388  | 43810107  | 4381051  |
| 354 NA19240 | [2515685 chr9  | 9  | 43812830  | 43814560  | 1731   | 5   | -0.439462 | 0.067087 | 43812736  | 43812924  | 43814465  | 4381465  |
| 355 NA19240 | [2515685 chr9  | 9  | 44083773  | 44085502  | 1730   | 3   | -0.525915 | 0.065012 | 44083617  | 44083930  | 44084777  | 4408622  |
| 356 NA19240 | [2515685 chr9  | 9  | 44683388  | 44684689  | 1302   | 2   | -0.491191 | 0.082184 | 44683188  | 44683589  | 44684573  | 4468480  |
| 357 NA19240 | [2515685 chr9  | 9  | 44925081  | 44926382  | 1302   | 2   | -0.49119  | 0.082184 | 44924965  | 44925198  | 44926181  | 4492658  |
| 358 NA19240 | [2515685 chr9  | 9  | 65024221  | 65029408  | 5188   | 9   | -0.295496 | 0.041175 | 65024164  | 65024278  | 65029186  | 6502963  |
| 359 NA19240 | [2515685 chr9  | 9  | 65934199  | 65944928  | 10730  | 17  | -0.283985 | 0.032761 | 65886442  | 65936564  | 65944882  | 6594497  |
| 360 NA19240 | [2515685 chr9  | 9  | 66005782  | 66012061  | 6280   | 5   | 0.57114   | 0.067671 | 66005453  | 66006111  | 66011904  | 6601221  |
| 361 NA19240 | [2515685 chr9  | 9  | 66114862  | 66116357  | 1496   | 3   | 0.600199  | 0.089305 | 66114613  | 66115111  | 66116174  | 6611654  |
| 362 NA19240 | [2515685 chr9  | 9  | 83676560  | 83678433  | 1874   | 2   | -0.665571 | 0.11345  | 83676131  | 83676990  | 83677891  | 8367897  |
| 363 NA19240 | [2515685 chr9  | 9  | 112902065 | 112932269 | 30205  | 42  | 0.44683   | 0.017413 | 112901557 | 112902574 | 112932121 | 11293291 |
| 364 NA19240 | [2515685 chr10 | 10 | 4279984   | 4282023   | 2040   | 2   | 1.707186  | 0.154081 | 4279599   | 4280370   | 4281521   | 428252   |
| 365 NA19240 | [2515685 chr10 | 10 | 6693908   | 6704321   | 10414  | 9   | 0.60783   | 0.050706 | 6692231   | 6695585   | 6704008   | 670463   |
| 366 NA19240 | [2515685 chr10 | 10 | 19786434  | 19793233  | 6800   | 7   | -0.28539  | 0.052766 | 19786013  | 19786856  | 19791659  | 1979480  |
| 367 NA19240 | [2515685 chr10 | 10 | 19850003  | 19851799  | 1797   | 2   | -0.610045 | 0.111694 | 19849781  | 19850225  | 19850931  | 1985266  |
| 368 NA19240 | [2515685 chr10 | 10 | 20733986  | 20734772  | 787    | 2   | -0.884663 | 0.096232 | 20733816  | 20734157  | 20734542  | 2073500  |
| 369 NA19240 | [2515685 chr10 | 10 | 42647712  | 42674701  | 26990  | 18  | 0.332217  | 0.034536 | 42647349  | 42648075  | 42674462  | 4267494  |
| 370 NA19240 | [2515685 chr10 | 10 | 46110964  | 46130305  | 19342  | 32  | -0.384979 | 0.021071 | 46110327  | 46111602  | 46129754  | 4613085  |
| 371 NA19240 | [2515685 chr10 | 10 | 46168755  | 46170845  | 2091   | 9   | -0.478719 | 0.045496 | 46168488  | 46169022  | 46170704  | 4617098  |
| 372 NA19240 | [2515685 chr10 | 10 | 46185144  | 46192298  | 7155   | 17  | -0.377524 | 0.0306   | 46184361  | 46185928  | 46192107  | 4619249  |
| 373 NA19240 | [2515685 chr10 | 10 | 46197322  | 46200163  | 2842   | 7   | -0.431181 | 0.047969 | 46197082  | 46197562  | 46200157  | 4620017  |
| 374 NA19240 | [2515685 chr10 | 10 | 46203384  | 46203870  | 487    | 2   | -0.821187 | 0.105534 | 46203103  | 46203665  | 46203731  | 4620401  |
| 375 NA19240 | [2515685 chr10 | 10 | 46216214  | 46221325  | 5112   | 19  | -0.346593 | 0.028841 | 46215871  | 46216557  | 46221069  | 4622158  |
| 376 NA19240 | [2515685 chr10 | 10 | 46230274  | 46381170  | 150897 | 249 | -0.320917 | 0.003522 | 46230243  | 46230306  | 46381004  | 4638133  |
| 377 NA19240 | [2515685 chr10 | 10 | 46387011  | 46600786  | 213776 | 291 | -0.320917 | 0.003522 | 46386854  | 46387168  | 46600776  | 4660079  |

|             |                |    |           |           |        |     |           |          |           |           |           |           |
|-------------|----------------|----|-----------|-----------|--------|-----|-----------|----------|-----------|-----------|-----------|-----------|
| 378 NA19240 | [2515685 chr10 | 10 | 46609694  | 46641482  | 31789  | 93  | -0.320917 | 0.003522 | 46609661  | 46609728  | 46640773  | 4664219:  |
| 379 NA19240 | [2515685 chr10 | 10 | 46645411  | 46675076  | 29666  | 107 | -0.320917 | 0.003522 | 46645296  | 46645526  | 46675054  | 4667509:  |
| 380 NA19240 | [2515685 chr10 | 10 | 46677788  | 46702144  | 24357  | 59  | -0.320917 | 0.003522 | 46677220  | 46678357  | 46701888  | 4670240:  |
| 381 NA19240 | [2515685 chr10 | 10 | 46711086  | 47067591  | 356506 | 327 | -0.320917 | 0.003522 | 46711055  | 46711118  | 47067384  | 4706779:  |
| 382 NA19240 | [2515685 chr10 | 10 | 47072697  | 47173707  | 101011 | 142 | -0.320917 | 0.003522 | 47072412  | 47072983  | 47173507  | 4717390:  |
| 383 NA19240 | [2515685 chr10 | 10 | 47223205  | 47224561  | 1357   | 2   | -0.545096 | 0.078984 | 47222985  | 47223426  | 472234315 | 4722480:  |
| 384 NA19240 | [2515685 chr10 | 10 | 47230731  | 47231502  | 772    | 2   | -0.636895 | 0.080932 | 47230574  | 47230889  | 47231201  | 4723180:  |
| 385 NA19240 | [2515685 chr10 | 10 | 47723232  | 47758287  | 35056  | 106 | -0.413883 | 0.012239 | 47575187  | 47725982  | 47758256  | 4775831:  |
| 386 NA19240 | [2515685 chr10 | 10 | 47767237  | 47772343  | 5107   | 20  | -0.347804 | 0.028392 | 47766982  | 47767493  | 47772001  | 4777268:  |
| 387 NA19240 | [2515685 chr10 | 10 | 47784708  | 47785178  | 471    | 2   | -0.783834 | 0.100502 | 47784551  | 47784866  | 47784896  | 4778546:  |
| 388 NA19240 | [2515685 chr10 | 10 | 47788401  | 47790975  | 2575   | 6   | -0.468814 | 0.053571 | 47788395  | 47788408  | 47790945  | 4779100:  |
| 389 NA19240 | [2515685 chr10 | 10 | 47796766  | 47803532  | 6767   | 22  | -0.417509 | 0.02823  | 47796723  | 47796810  | 47802824  | 4780424:  |
| 390 NA19240 | [2515685 chr10 | 10 | 47817871  | 47820294  | 2424   | 8   | -0.432075 | 0.051665 | 47817785  | 47817958  | 47820036  | 4782055:  |
| 391 NA19240 | [2515685 chr10 | 10 | 47881201  | 47882889  | 1689   | 4   | -0.453338 | 0.060225 | 47881184  | 47881219  | 47882645  | 4788313:  |
| 392 NA19240 | [2515685 chr10 | 10 | 47889059  | 47889830  | 772    | 2   | -0.636895 | 0.080932 | 47888902  | 47889217  | 47889529  | 4789013:  |
| 393 NA19240 | [2515685 chr10 | 10 | 48499011  | 48516837  | 17827  | 28  | -0.386328 | 0.022194 | 48498672  | 48499351  | 48516285  | 4851739:  |
| 394 NA19240 | [2515685 chr10 | 10 | 48558524  | 48560613  | 2090   | 10  | -0.469501 | 0.043327 | 48558257  | 48558791  | 48560472  | 4856075:  |
| 395 NA19240 | [2515685 chr10 | 10 | 48574881  | 48581856  | 6976   | 17  | -0.35743  | 0.031005 | 48574098  | 48575665  | 48581487  | 4858222:  |
| 396 NA19240 | [2515685 chr10 | 10 | 48587057  | 48597050  | 9994   | 24  | -0.382787 | 0.025823 | 48586817  | 48587297  | 48594300  | 4860023:  |
| 397 NA19240 | [2515685 chr10 | 10 | 48620019  | 48865591  | 245573 | 175 | -0.382734 | 0.008749 | 48619988  | 48620051  | 48865564  | 4886561:  |
| 398 NA19240 | [2515685 chr10 | 10 | 48925221  | 48927636  | 2416   | 10  | -0.433341 | 0.044559 | 48924954  | 48925488  | 48927550  | 4892772:  |
| 399 NA19240 | [2515685 chr10 | 10 | 51120710  | 51129602  | 8893   | 11  | -0.424495 | 0.035946 | 51120483  | 51120937  | 51128757  | 5113044:  |
| 400 NA19240 | [2515685 chr10 | 10 | 51305335  | 51306461  | 1127   | 3   | 0.470537  | 0.092011 | 51305028  | 51305642  | 51306228  | 5130669:  |
| 401 NA19240 | [2515685 chr10 | 10 | 51579778  | 51580807  | 1030   | 2   | 0.796527  | 0.0947   | 51579403  | 51580153  | 51580551  | 5158106:  |
| 402 NA19240 | [2515685 chr10 | 10 | 55592756  | 55692072  | 99317  | 4   | -0.373438 | 0.062809 | 55473112  | 55595506  | 55691526  | 5569261:  |
| 403 NA19240 | [2515685 chr10 | 10 | 56117212  | 56139275  | 22064  | 20  | -0.941515 | 0.034369 | 56115764  | 56118661  | 56138931  | 5613961:  |
| 404 NA19240 | [2515685 chr10 | 10 | 58879708  | 58882015  | 2308   | 5   | -3.383784 | 0.140681 | 58879568  | 58879849  | 58881863  | 5888216:  |
| 405 NA19240 | [2515685 chr10 | 10 | 81662330  | 81669493  | 7164   | 11  | -0.314549 | 0.04335  | 81662046  | 81662614  | 81669128  | 8166985:  |
| 406 NA19240 | [2515685 chr10 | 10 | 88823459  | 88834972  | 11514  | 16  | -0.29581  | 0.034996 | 88823233  | 88823685  | 88834493  | 8883545:  |
| 407 NA19240 | [2515685 chr10 | 10 | 88866417  | 88962020  | 95604  | 104 | -0.3758   | 0.012969 | 88865617  | 88867217  | 88961639  | 8896240:  |
| 408 NA19240 | [2515685 chr10 | 10 | 89144692  | 89179229  | 34538  | 52  | -0.327051 | 0.019217 | 89144420  | 89144965  | 89178871  | 8917958:  |
| 409 NA19240 | [2515685 chr10 | 10 | 124331349 | 124348266 | 16918  | 17  | 0.312949  | 0.032336 | 124330248 | 124332451 | 124348238 | 12434829: |
| 410 NA19240 | [2515685 chr10 | 10 | 134168766 | 134170259 | 1494   | 17  | -1.385627 | 0.046293 | 134168524 | 134169008 | 134170027 | 13417042: |
| 411 NA19240 | [2515685 chr10 | 10 | 135365507 | 135389814 | 24308  | 21  | -0.394425 | 0.023454 | 135364999 | 135366016 | 135387500 | 13539212: |
| 412 NA19240 | [2515685 chr11 | 11 | 2840307   | 2842410   | 2104   | 3   | -0.986013 | 0.09555  | 2839959   | 2840656   | 2841856   | 284296:   |
| 413 NA19240 | [2515685 chr11 | 11 | 2999679   | 3174862   | 175184 | 3   | -0.449509 | 0.077643 | 2949255   | 3002762   | 3173264   | 317646:   |
| 414 NA19240 | [2515685 chr11 | 11 | 3343807   | 3347185   | 3379   | 2   | -0.995768 | 0.103785 | 3342218   | 3345397   | 3345938   | 334843:   |
| 415 NA19240 | [2515685 chr11 | 11 | 4196036   | 4337785   | 141750 | 172 | 0.570587  | 0.011175 | 4195615   | 4196457   | 4334702   | 434384:   |
| 416 NA19240 | [2515685 chr11 | 11 | 4924115   | 4932599   | 8485   | 9   | 0.96416   | 0.050498 | 4923827   | 4924403   | 4931948   | 493325:   |
| 417 NA19240 | [2515685 chr11 | 11 | 5717038   | 5718491   | 1454   | 2   | 3.763107  | 0.217285 | 5716660   | 5717416   | 5718038   | 571894:   |
| 418 NA19240 | [2515685 chr11 | 11 | 5741269   | 5765993   | 24725  | 33  | 2.71068   | 0.044682 | 5741059   | 5741480   | 5765632   | 576635:   |
| 419 NA19240 | [2515685 chr11 | 11 | 5830457   | 5843035   | 12579  | 12  | -2.432267 | 0.07029  | 5828206   | 5832709   | 5839952   | 584917:   |
| 420 NA19240 | [2515685 chr11 | 11 | 8911974   | 8914660   | 2687   | 2   | 0.483606  | 0.096249 | 8911525   | 8912424   | 8913646   | 891567:   |
| 421 NA19240 | [2515685 chr11 | 11 | 11831868  | 11833089  | 1222   | 2   | 0.932562  | 0.111007 | 11831412  | 11832324  | 11832853  | 1183332:  |
| 422 NA19240 | [2515685 chr11 | 11 | 18903450  | 18923022  | 19573  | 30  | 0.423863  | 0.026481 | 18897800  | 18906533  | 18919939  | 1892845:  |
| 423 NA19240 | [2515685 chr11 | 11 | 28965605  | 28969186  | 3582   | 5   | 3.515466  | 0.155406 | 28965284  | 28965927  | 28968702  | 2896967:  |
| 424 NA19240 | [2515685 chr11 | 11 | 30128605  | 30133794  | 5190   | 5   | -0.819206 | 0.067944 | 30127846  | 30129364  | 30133432  | 3013415:  |
| 425 NA19240 | [2515685 chr11 | 11 | 48284073  | 48284771  | 699    | 2   | 0.984255  | 0.109799 | 48283862  | 48284285  | 48284572  | 4828497:  |
| 426 NA19240 | [2515685 chr11 | 11 | 49665830  | 49715831  | 50002  | 36  | 0.491996  | 0.024664 | 49665251  | 49666410  | 49712748  | 4972198:  |
| 427 NA19240 | [2515685 chr11 | 11 | 60721034  | 60777477  | 56444  | 74  | 0.656898  | 0.014107 | 60720112  | 60721956  | 60776810  | 6077814:  |
| 428 NA19240 | [2515685 chr11 | 11 | 73812690  | 73818580  | 5891   | 4   | -0.435787 | 0.077671 | 73812400  | 73812981  | 73818213  | 7381894:  |
| 429 NA19240 | [2515685 chr11 | 11 | 74210297  | 74211394  | 1098   | 2   | 0.561002  | 0.101958 | 74209985  | 74210609  | 74211068  | 7421172:  |
| 430 NA19240 | [2515685 chr11 | 11 | 88266938  | 88303948  | 37011  | 39  | 0.281165  | 0.023957 | 88266424  | 88267453  | 88303762  | 8830413:  |
| 431 NA19240 | [2515685 chr11 | 11 | 89184898  | 89189792  | 4895   | 5   | 0.551753  | 0.078845 | 89184243  | 89185554  | 89189177  | 8919040:  |
| 432 NA19240 | [2515685 chr11 | 11 | 98617439  | 98624223  | 6785   | 6   | -0.390614 | 0.063342 | 98617056  | 98617823  | 98623108  | 9862533:  |

|             |                |    |           |           |         |      |           |          |           |           |           |          |
|-------------|----------------|----|-----------|-----------|---------|------|-----------|----------|-----------|-----------|-----------|----------|
| 433 NA19240 | [2515685 chr11 | 11 | 103821596 | 103826140 | 4545    | 4    | -0.939635 | 0.084689 | 103820771 | 103822422 | 103825876 | 10382640 |
| 434 NA19240 | [2515685 chr11 | 11 | 106744846 | 106751054 | 6209    | 9    | -0.921654 | 0.056436 | 106744561 | 106745131 | 106747971 | 10675483 |
| 435 NA19240 | [2515685 chr11 | 11 | 134107699 | 134112290 | 4592    | 5    | 0.792101  | 0.07017  | 134106591 | 134108808 | 134111845 | 13411273 |
| 436 NA19240 | [2515685 chr12 | 12 | 736840    | 744802    | 7963    | 9    | 0.818918  | 0.049585 | 736616    | 737064    | 744211    | 745394   |
| 437 NA19240 | [2515685 chr12 | 12 | 2112534   | 2127044   | 14511   | 15   | 0.686754  | 0.038843 | 2109107   | 2115961   | 2126809   | 2127279  |
| 438 NA19240 | [2515685 chr12 | 12 | 6113530   | 6118188   | 4659    | 4    | 0.547035  | 0.08194  | 6111640   | 6115421   | 6117816   | 6118567  |
| 439 NA19240 | [2515685 chr12 | 12 | 8246132   | 8259229   | 13098   | 13   | -0.331204 | 0.040789 | 8245948   | 8246317   | 8259044   | 8259414  |
| 440 NA19240 | [2515685 chr12 | 12 | 9267394   | 9271654   | 4261    | 2    | -0.678413 | 0.118005 | 9266955   | 9267834   | 9270768   | 9272540  |
| 441 NA19240 | [2515685 chr12 | 12 | 9527659   | 9610804   | 83146   | 90   | 0.684438  | 0.016947 | 9526872   | 9528447   | 9610082   | 9611520  |
| 442 NA19240 | [2515685 chr12 | 12 | 9615549   | 9624971   | 9423    | 11   | 0.349361  | 0.042873 | 9615302   | 9615796   | 9623223   | 9626720  |
| 443 NA19240 | [2515685 chr12 | 12 | 11060019  | 11184613  | 124595  | 134  | -0.295506 | 0.012525 | 11059499  | 11060539  | 11184213  | 11185014 |
| 444 NA19240 | [2515685 chr12 | 12 | 11398049  | 11463223  | 65175   | 66   | -0.612032 | 0.018628 | 11397507  | 11398591  | 11459990  | 11466454 |
| 445 NA19240 | [2515685 chr12 | 12 | 27539466  | 27545857  | 6392    | 9    | -0.909214 | 0.054911 | 27539237  | 27539695  | 27545179  | 27546531 |
| 446 NA19240 | [2515685 chr12 | 12 | 30193719  | 30197709  | 3991    | 2    | -0.509546 | 0.101372 | 30190617  | 30196822  | 30197365  | 30198050 |
| 447 NA19240 | [2515685 chr12 | 12 | 31155331  | 31244780  | 89450   | 84   | 0.367992  | 0.016095 | 31155092  | 31155571  | 31244217  | 31245340 |
| 448 NA19240 | [2515685 chr12 | 12 | 33349405  | 33350483  | 1079    | 3    | 0.445242  | 0.082283 | 33349293  | 33349518  | 33350118  | 33350840 |
| 449 NA19240 | [2515685 chr12 | 12 | 34099919  | 34108168  | 8250    | 12   | -1.674524 | 0.059014 | 34099639  | 34100199  | 34107972  | 34108360 |
| 450 NA19240 | [2515685 chr12 | 12 | 37034688  | 37042251  | 7564    | 10   | -0.343368 | 0.048556 | 37034587  | 37034789  | 37041755  | 37042740 |
| 451 NA19240 | [2515685 chr12 | 12 | 38614834  | 38616770  | 1937    | 2    | 0.687454  | 0.110529 | 38614179  | 38615489  | 38616336  | 38617200 |
| 452 NA19240 | [2515685 chr12 | 12 | 57004588  | 57020201  | 15614   | 8    | 0.278078  | 0.052788 | 57004218  | 57004958  | 57019624  | 57020770 |
| 453 NA19240 | [2515685 chr12 | 12 | 59039529  | 59044445  | 4917    | 6    | -0.942905 | 0.060599 | 59039220  | 59039839  | 59044045  | 59044840 |
| 454 NA19240 | [2515685 chr12 | 12 | 69156918  | 69167890  | 10973   | 11   | 0.764413  | 0.04783  | 69138649  | 69160412  | 69164396  | 69215010 |
| 455 NA19240 | [2515685 chr12 | 12 | 76541412  | 76542387  | 976     | 2    | -0.580913 | 0.099217 | 76541156  | 76541669  | 76542208  | 76542560 |
| 456 NA19240 | [2515685 chr12 | 12 | 78656134  | 78665261  | 9128    | 9    | -0.628409 | 0.052527 | 78654687  | 78657582  | 78664736  | 78665780 |
| 457 NA19240 | [2515685 chr12 | 12 | 128601598 | 128602937 | 1340    | 2    | -0.775548 | 0.097417 | 128601341 | 128601856 | 128602454 | 12860342 |
| 458 NA19240 | [2515685 chr12 | 12 | 129289092 | 129290995 | 1904    | 2    | 0.607141  | 0.113197 | 129288331 | 129289853 | 129290505 | 12929148 |
| 459 NA19240 | [2515685 chr12 | 12 | 130798727 | 130802870 | 4144    | 5    | -0.794299 | 0.062551 | 130798268 | 130799187 | 130801345 | 13080439 |
| 460 NA19240 | [2515685 chr12 | 12 | 132329408 | 132354689 | 25282   | 22   | 0.509761  | 0.030559 | 132327728 | 132331088 | 132353825 | 13235555 |
| 461 NA19240 | [2515685 chr13 | 13 | 18353090  | 18361407  | 8318    | 10   | 0.271688  | 0.047987 | 18352500  | 18353681  | 18361149  | 18361660 |
| 462 NA19240 | [2515685 chr13 | 13 | 25947233  | 25950398  | 3166    | 3    | 3.850159  | 0.173882 | 25946194  | 25948272  | 25949415  | 25951380 |
| 463 NA19240 | [2515685 chr13 | 13 | 31430484  | 31437209  | 6726    | 7    | -0.871508 | 0.06187  | 31430130  | 31430838  | 31436488  | 31437930 |
| 464 NA19240 | [2515685 chr13 | 13 | 33029570  | 33042392  | 12823   | 8    | 0.696675  | 0.057707 | 33000262  | 33034253  | 33041860  | 33042920 |
| 465 NA19240 | [2515685 chr13 | 13 | 56611711  | 56645734  | 34024   | 47   | 0.704466  | 0.015326 | 56610946  | 56612477  | 56645321  | 56646140 |
| 466 NA19240 | [2515685 chr13 | 13 | 56653890  | 56686136  | 32247   | 30   | -2.989777 | 0.049651 | 56650401  | 56657380  | 56685381  | 56686890 |
| 467 NA19240 | [2515685 chr13 | 13 | 69633905  | 69673289  | 39385   | 42   | 0.805192  | 0.02418  | 69633412  | 69634399  | 69672985  | 69673590 |
| 468 NA19240 | [2515685 chr13 | 13 | 109215660 | 109217089 | 1430    | 5    | 0.392656  | 0.061406 | 109215230 | 109216090 | 109216885 | 10921729 |
| 469 NA19240 | [2515685 chr13 | 13 | 112581812 | 112584892 | 3081    | 4    | 0.39731   | 0.075451 | 112581214 | 112582411 | 112584628 | 11258515 |
| 470 NA19240 | [2515685 chr13 | 13 | 113079647 | 113086821 | 7175    | 3    | 0.728817  | 0.082913 | 113078890 | 113080404 | 113082138 | 11309434 |
| 471 NA19240 | [2515685 chr14 | 14 | 18527136  | 18542743  | 15608   | 7    | -1.282395 | 0.062577 | 18526373  | 18527899  | 18541619  | 18543860 |
| 472 NA19240 | [2515685 chr14 | 14 | 18577981  | 18666040  | 88060   | 148  | -0.258801 | 0.011301 | 18577779  | 18578183  | 18665967  | 18666110 |
| 473 NA19240 | [2515685 chr14 | 14 | 18873416  | 18874587  | 1172    | 3    | 0.394921  | 0.075132 | 18873128  | 18873704  | 18874433  | 18874740 |
| 474 NA19240 | [2515685 chr14 | 14 | 19050364  | 19135482  | 85119   | 139  | -0.255034 | 0.011568 | 19049791  | 19050938  | 19135280  | 19135680 |
| 475 NA19240 | [2515685 chr14 | 14 | 19247875  | 19249086  | 1212    | 4    | 0.352855  | 0.062907 | 19247548  | 19248203  | 19248932  | 19249240 |
| 476 NA19240 | [2515685 chr14 | 14 | 19254367  | 19494842  | 240476  | 222  | 0.325075  | 0.00963  | 19254200  | 19254535  | 19494444  | 19495240 |
| 477 NA19240 | [2515685 chr14 | 14 | 20419771  | 20485011  | 65241   | 65   | -0.638284 | 0.018571 | 20418783  | 20420760  | 20484687  | 20485330 |
| 478 NA19240 | [2515685 chr14 | 14 | 32022775  | 32026140  | 3366    | 2    | -0.932471 | 0.132864 | 32022274  | 32023276  | 32023749  | 32028530 |
| 479 NA19240 | [2515685 chr14 | 14 | 69086774  | 69092832  | 6059    | 6    | -0.866799 | 0.058391 | 69086153  | 69087395  | 69092239  | 69093420 |
| 480 NA19240 | [2515685 chr14 | 14 | 73052083  | 73053781  | 1699    | 2    | -0.492667 | 0.083535 | 73051714  | 73052452  | 73052927  | 73054630 |
| 481 NA19240 | [2515685 chr14 | 14 | 73074647  | 73084642  | 9996    | 11   | -0.398811 | 0.050666 | 73073800  | 73075495  | 73083193  | 73086090 |
| 482 NA19240 | [2515685 chr14 | 14 | 73106064  | 73110687  | 4624    | 3    | 0.601096  | 0.081543 | 73105752  | 73106376  | 73110054  | 73111320 |
| 483 NA19240 | [2515685 chr15 | 15 | 18457915  | 20094952  | 1637038 | 1887 | 0.414112  | 0.00311  | 18457619  | 18458212  | 20092648  | 20197780 |
| 484 NA19240 | [2515685 chr15 | 15 | 20299474  | 20300331  | 858     | 4    | 0.476717  | 0.062307 | 20299304  | 20299644  | 20300152  | 20300510 |
| 485 NA19240 | [2515685 chr15 | 15 | 20367533  | 20383831  | 16299   | 18   | -0.358559 | 0.031193 | 20367145  | 20367922  | 20383079  | 20384580 |
| 486 NA19240 | [2515685 chr15 | 15 | 20853726  | 21155274  | 301549  | 473  | 0.260269  | 0.005659 | 20852984  | 20854468  | 21155028  | 21155520 |
| 487 NA19240 | [2515685 chr15 | 15 | 21606753  | 21614602  | 7850    | 7    | 0.748304  | 0.064424 | 21606459  | 21607047  | 21612298  | 21636690 |

|             |                |    |           |           |        |     |           |          |           |           |           |           |
|-------------|----------------|----|-----------|-----------|--------|-----|-----------|----------|-----------|-----------|-----------|-----------|
| 488 NA19240 | [2515685 chr15 | 15 | 24986053  | 24992250  | 6198   | 7   | 0.874465  | 0.061877 | 24985426  | 24986680  | 24991680  | 24992820  |
| 489 NA19240 | [2515685 chr15 | 15 | 26122736  | 26158825  | 36090  | 72  | 0.274651  | 0.016082 | 26122560  | 26122913  | 26158403  | 26159247  |
| 490 NA19240 | [2515685 chr15 | 15 | 26203426  | 26240188  | 36763  | 48  | 0.302345  | 0.020146 | 26200607  | 26205730  | 26239327  | 26241049  |
| 491 NA19240 | [2515685 chr15 | 15 | 26263621  | 26264479  | 859    | 5   | 0.480259  | 0.053564 | 26263442  | 26263801  | 26264309  | 26264649  |
| 492 NA19240 | [2515685 chr15 | 15 | 26610077  | 26610934  | 858    | 5   | 0.480266  | 0.053564 | 26609907  | 26610247  | 26610755  | 26611111  |
| 493 NA19240 | [2515685 chr15 | 15 | 26634490  | 26698406  | 63917  | 121 | 0.352844  | 0.01216  | 26634296  | 26634685  | 26698391  | 26698421  |
| 494 NA19240 | [2515685 chr15 | 15 | 26701674  | 26709234  | 7561   | 20  | 0.311198  | 0.029506 | 26701600  | 26701748  | 26708487  | 26709987  |
| 495 NA19240 | [2515685 chr15 | 15 | 27133610  | 27134889  | 1280   | 4   | 0.458954  | 0.074124 | 27133306  | 27133914  | 27134660  | 27135111  |
| 496 NA19240 | [2515685 chr15 | 15 | 30296241  | 30304775  | 8535   | 5   | 0.565504  | 0.061565 | 30295664  | 30296819  | 30302471  | 30308721  |
| 497 NA19240 | [2515685 chr15 | 15 | 32461224  | 32656877  | 195654 | 200 | 0.345251  | 0.009281 | 32460923  | 32461525  | 32656150  | 32657601  |
| 498 NA19240 | [2515685 chr15 | 15 | 41649722  | 41651718  | 1997   | 3   | -0.557318 | 0.06064  | 41649486  | 41649959  | 41651326  | 41652111  |
| 499 NA19240 | [2515685 chr15 | 15 | 41680524  | 41683350  | 2827   | 4   | -0.574714 | 0.074188 | 41680301  | 41680748  | 41682961  | 41683731  |
| 500 NA19240 | [2515685 chr15 | 15 | 41698345  | 41739774  | 41430  | 38  | -0.535533 | 0.023999 | 41698259  | 41698432  | 41739336  | 41740211  |
| 501 NA19240 | [2515685 chr15 | 15 | 41749287  | 41753432  | 4146   | 6   | -0.537875 | 0.045229 | 41749051  | 41749524  | 41753204  | 41753661  |
| 502 NA19240 | [2515685 chr15 | 15 | 42919433  | 42933036  | 13604  | 21  | -0.459326 | 0.033245 | 42919264  | 42919602  | 42932699  | 42933371  |
| 503 NA19240 | [2515685 chr15 | 15 | 43106834  | 43111174  | 4341   | 5   | 0.41739   | 0.063898 | 43106498  | 43107171  | 43111071  | 43111271  |
| 504 NA19240 | [2515685 chr15 | 15 | 43122446  | 43130034  | 7589   | 10  | -0.304877 | 0.046573 | 43122110  | 43122783  | 43127827  | 43132247  |
| 505 NA19240 | [2515685 chr15 | 15 | 72153849  | 72167749  | 13901  | 24  | -0.250846 | 0.026283 | 72153527  | 72154172  | 72167598  | 72167901  |
| 506 NA19240 | [2515685 chr15 | 15 | 82869847  | 82893636  | 23790  | 8   | -0.270917 | 0.051703 | 82860467  | 82872151  | 82892955  | 82894311  |
| 507 NA19240 | [2515685 chr15 | 15 | 98234084  | 98240716  | 6633   | 8   | 0.81774   | 0.056358 | 98233842  | 98234327  | 98239350  | 98242081  |
| 508 NA19240 | [2515685 chr15 | 15 | 99806273  | 99808092  | 1820   | 3   | 0.502582  | 0.088205 | 99805943  | 99806604  | 99808725  | 99808361  |
| 509 NA19240 | [2515685 chr15 | 15 | 100109640 | 100122682 | 13043  | 98  | 0.470454  | 0.011563 | 100108905 | 100110376 | 100122315 | 100123051 |
| 510 NA19240 | [2515685 chr15 | 15 | 100280652 | 100309150 | 28499  | 12  | 0.399534  | 0.041721 | 100279866 | 100281439 | 100307499 | 100310801 |
| 511 NA19240 | [2515685 chr16 | 16 | 16364956  | 16369296  | 4341   | 12  | 0.342611  | 0.043175 | 16364757  | 16365156  | 16368912  | 16369681  |
| 512 NA19240 | [2515685 chr16 | 16 | 16633469  | 16639120  | 5652   | 4   | 0.523231  | 0.074473 | 16632502  | 16634437  | 16638386  | 16639851  |
| 513 NA19240 | [2515685 chr16 | 16 | 20419891  | 20441474  | 21584  | 24  | -0.748359 | 0.032391 | 20419728  | 20420055  | 20441310  | 20441631  |
| 514 NA19240 | [2515685 chr16 | 16 | 22555361  | 22618743  | 63383  | 56  | 0.348677  | 0.019534 | 22554963  | 22555760  | 22617181  | 22620301  |
| 515 NA19240 | [2515685 chr16 | 16 | 28324617  | 28333325  | 8709   | 8   | -0.377207 | 0.052626 | 28324569  | 28324665  | 28333269  | 28333381  |
| 516 NA19240 | [2515685 chr16 | 16 | 28619629  | 28628077  | 8449   | 7   | -0.395732 | 0.056062 | 28619573  | 28619686  | 28627777  | 28628371  |
| 517 NA19240 | [2515685 chr16 | 16 | 32159898  | 32160377  | 480    | 2   | -1.871852 | 0.097896 | 32159453  | 32160343  | 32160346  | 32160401  |
| 518 NA19240 | [2515685 chr16 | 16 | 32606692  | 32607163  | 472    | 2   | -1.871959 | 0.097899 | 32606661  | 32606724  | 32606727  | 32607591  |
| 519 NA19240 | [2515685 chr16 | 16 | 33100875  | 33101346  | 472    | 2   | -1.87196  | 0.097899 | 33100438  | 33101312  | 33101315  | 33101371  |
| 520 NA19240 | [2515685 chr16 | 16 | 33157406  | 33157879  | 474    | 2   | -1.871959 | 0.097899 | 33156967  | 33157845  | 33157848  | 33157911  |
| 521 NA19240 | [2515685 chr16 | 16 | 33279915  | 33392689  | 112775 | 133 | 0.419681  | 0.012497 | 33279435  | 33280395  | 33392062  | 33393311  |
| 522 NA19240 | [2515685 chr16 | 16 | 33517815  | 33527315  | 9501   | 16  | 0.476392  | 0.036051 | 33517395  | 33518236  | 33527149  | 33527481  |
| 523 NA19240 | [2515685 chr16 | 16 | 33852157  | 33872679  | 20523  | 13  | 0.254353  | 0.041763 | 33851926  | 33852389  | 33871847  | 33873511  |
| 524 NA19240 | [2515685 chr16 | 16 | 34321825  | 34342005  | 20181  | 31  | -0.44954  | 0.008235 | 34317185  | 34323706  | 34341760  | 34342251  |
| 525 NA19240 | [2515685 chr16 | 16 | 34343871  | 34609074  | 265204 | 287 | -0.44954  | 0.008235 | 34343515  | 34344228  | 34607193  | 34617321  |
| 526 NA19240 | [2515685 chr16 | 16 | 57204541  | 57207585  | 3045   | 3   | 5.395951  | 0.22484  | 57204170  | 57204913  | 57206938  | 57208231  |
| 527 NA19240 | [2515685 chr16 | 16 | 57231525  | 57234603  | 3079   | 2   | -0.50127  | 0.097667 | 57230452  | 57232599  | 57233543  | 57235661  |
| 528 NA19240 | [2515685 chr16 | 16 | 68706855  | 68755580  | 48726  | 53  | -0.283697 | 0.019902 | 68705436  | 68708274  | 68755265  | 68755891  |
| 529 NA19240 | [2515685 chr16 | 16 | 70647868  | 70671691  | 23824  | 16  | 0.592367  | 0.038345 | 70647656  | 70648081  | 70669810  | 70675821  |
| 530 NA19240 | [2515685 chr16 | 16 | 73831886  | 73834654  | 2769   | 5   | 0.352879  | 0.056995 | 73831668  | 73832104  | 73834308  | 73835001  |
| 531 NA19240 | [2515685 chr16 | 16 | 76930776  | 76942282  | 11507  | 9   | 0.700799  | 0.049617 | 76930290  | 76931263  | 76941602  | 76942961  |
| 532 NA19240 | [2515685 chr16 | 16 | 83994929  | 84004171  | 9243   | 81  | -0.824707 | 0.014319 | 83994558  | 83995300  | 84003767  | 84004571  |
| 533 NA19240 | [2515685 chr16 | 16 | 84562720  | 84565235  | 2516   | 11  | 0.544058  | 0.048025 | 84561685  | 84563756  | 84565142  | 84565321  |
| 534 NA19240 | [2515685 chr17 | 17 | 966845    | 969578    | 2734   | 21  | 0.474234  | 0.033989 | 966537    | 967154    | 969378    | 969775    |
| 535 NA19240 | [2515685 chr17 | 17 | 16662933  | 16665630  | 2698   | 5   | -1.076496 | 0.07408  | 16662626  | 16663241  | 16665353  | 16665901  |
| 536 NA19240 | [2515685 chr17 | 17 | 18260404  | 18263581  | 3178   | 5   | 0.394133  | 0.065663 | 18259767  | 18261042  | 18262481  | 18264681  |
| 537 NA19240 | [2515685 chr17 | 17 | 18296513  | 18346349  | 49837  | 82  | 0.480534  | 0.016288 | 18296246  | 18296781  | 18345958  | 18346741  |
| 538 NA19240 | [2515685 chr17 | 17 | 20286198  | 20335856  | 49659  | 80  | 0.449834  | 0.016293 | 20286103  | 20286294  | 20335559  | 20336151  |
| 539 NA19240 | [2515685 chr17 | 17 | 20368693  | 20371943  | 3251   | 7   | 0.431458  | 0.054627 | 20367677  | 20369709  | 20371308  | 20372571  |
| 540 NA19240 | [2515685 chr17 | 17 | 20542355  | 20546522  | 4168   | 7   | 0.441106  | 0.053995 | 20542273  | 20542438  | 20545554  | 20547491  |
| 541 NA19240 | [2515685 chr17 | 17 | 20571353  | 20578410  | 7058   | 6   | 0.587921  | 0.061854 | 20571124  | 20571582  | 20577452  | 20579361  |
| 542 NA19240 | [2515685 chr17 | 17 | 20644041  | 20648732  | 4692   | 4   | 0.631892  | 0.073431 | 20643647  | 20644435  | 20647744  | 20649721  |

|             |                |    |          |          |        |     |           |          |          |          |          |          |
|-------------|----------------|----|----------|----------|--------|-----|-----------|----------|----------|----------|----------|----------|
| 543 NA19240 | [2515685 chr17 | 17 | 21945626 | 21951091 | 5466   | 9   | -0.45746  | 0.047016 | 21945338 | 21945915 | 21950751 | 21951437 |
| 544 NA19240 | [2515685 chr17 | 17 | 22130286 | 22142918 | 12633  | 32  | 0.258504  | 0.025958 | 22129948 | 22130624 | 22142541 | 22143291 |
| 545 NA19240 | [2515685 chr17 | 17 | 23110872 | 23111904 | 1033   | 2   | 0.609658  | 0.106001 | 23110581 | 23111163 | 23111678 | 23112137 |
| 546 NA19240 | [2515685 chr17 | 17 | 27466538 | 27470835 | 4298   | 5   | 0.351575  | 0.067351 | 27465972 | 27467105 | 27469974 | 27471691 |
| 547 NA19240 | [2515685 chr17 | 17 | 31430406 | 31835531 | 405126 | 543 | 0.695124  | 0.005015 | 31429658 | 31431155 | 31835215 | 31835847 |
| 548 NA19240 | [2515685 chr17 | 17 | 31865078 | 31886556 | 21479  | 65  | 0.695124  | 0.005015 | 31864350 | 31865807 | 31886086 | 31887027 |
| 549 NA19240 | [2515685 chr17 | 17 | 32829500 | 32835174 | 5675   | 6   | 0.884904  | 0.068718 | 32828825 | 32830175 | 32833793 | 32836551 |
| 550 NA19240 | [2515685 chr17 | 17 | 33288815 | 33289544 | 730    | 3   | 0.532584  | 0.076703 | 33288407 | 33289224 | 33289524 | 33289561 |
| 551 NA19240 | [2515685 chr17 | 17 | 33353966 | 33556628 | 202663 | 258 | 0.615016  | 0.006409 | 33353659 | 33354273 | 33556321 | 33556931 |
| 552 NA19240 | [2515685 chr17 | 17 | 33585313 | 33656675 | 71363  | 123 | 0.615016  | 0.006409 | 33584586 | 33586040 | 33656626 | 33656721 |
| 553 NA19240 | [2515685 chr17 | 17 | 33657119 | 33659558 | 2440   | 6   | 0.271186  | 0.054061 | 33656987 | 33657252 | 33658997 | 33660111 |
| 554 NA19240 | [2515685 chr17 | 17 | 36675530 | 36685343 | 9814   | 10  | -2.196005 | 0.072003 | 36675011 | 36676049 | 36684647 | 36686041 |
| 555 NA19240 | [2515685 chr17 | 17 | 36760802 | 36779372 | 18571  | 20  | -0.748041 | 0.037339 | 36760010 | 36761595 | 36779070 | 36779671 |
| 556 NA19240 | [2515685 chr17 | 17 | 36785682 | 36793113 | 7432   | 8   | 0.56019   | 0.056809 | 36785202 | 36786162 | 36792578 | 36793641 |
| 557 NA19240 | [2515685 chr17 | 17 | 36993884 | 36995674 | 1791   | 2   | -1.459845 | 0.111774 | 36993311 | 36994458 | 36995333 | 36996011 |
| 558 NA19240 | [2515685 chr17 | 17 | 37047451 | 37049621 | 2171   | 2   | -0.496112 | 0.093502 | 37046997 | 37047905 | 37049259 | 37049981 |
| 559 NA19240 | [2515685 chr17 | 17 | 37058969 | 37061007 | 2039   | 2   | 0.947332  | 0.108582 | 37058714 | 37059224 | 37060383 | 37061631 |
| 560 NA19240 | [2515685 chr17 | 17 | 41006614 | 41018715 | 12102  | 15  | -0.300976 | 0.037831 | 41006215 | 41007013 | 41018308 | 41019121 |
| 561 NA19240 | [2515685 chr17 | 17 | 41035524 | 41036525 | 1002   | 2   | -0.69706  | 0.099625 | 41035120 | 41035928 | 41035967 | 41037081 |
| 562 NA19240 | [2515685 chr17 | 17 | 41675037 | 41676708 | 1672   | 2   | -0.697059 | 0.099625 | 41673805 | 41676270 | 41676309 | 41677101 |
| 563 NA19240 | [2515685 chr17 | 17 | 41789182 | 41921615 | 132434 | 130 | 0.306902  | 0.010139 | 41788428 | 41789936 | 41920590 | 41922641 |
| 564 NA19240 | [2515685 chr17 | 17 | 42006681 | 42134816 | 128136 | 122 | 0.295241  | 0.010426 | 42005927 | 42007435 | 42134422 | 42135211 |
| 565 NA19240 | [2515685 chr17 | 17 | 42472568 | 42488850 | 16283  | 23  | 0.272441  | 0.02653  | 42468732 | 42474768 | 42487442 | 42490251 |
| 566 NA19240 | [2515685 chr17 | 17 | 42975972 | 43026670 | 50699  | 75  | 0.878454  | 0.018115 | 42975162 | 42976783 | 43025568 | 43027771 |
| 567 NA19240 | [2515685 chr17 | 17 | 48567314 | 48568162 | 849    | 2   | -0.532103 | 0.10386  | 48567066 | 48567563 | 48567948 | 48568371 |
| 568 NA19240 | [2515685 chr17 | 17 | 55368842 | 55372541 | 3700   | 5   | 0.687592  | 0.068899 | 55368278 | 55369406 | 55372325 | 55372751 |
| 569 NA19240 | [2515685 chr17 | 17 | 55434888 | 55452955 | 18068  | 34  | 0.549596  | 0.022558 | 55434445 | 55435332 | 55452577 | 55453331 |
| 570 NA19240 | [2515685 chr17 | 17 | 55457020 | 55459798 | 2779   | 3   | 0.513628  | 0.081224 | 55456371 | 55457669 | 55459168 | 55460421 |
| 571 NA19240 | [2515685 chr17 | 17 | 55529573 | 55543551 | 13979  | 2   | 1.005068  | 0.112865 | 55527911 | 55531236 | 55542674 | 55544421 |
| 572 NA19240 | [2515685 chr17 | 17 | 55550803 | 55553809 | 3007   | 3   | 0.513628  | 0.081224 | 55549945 | 55551662 | 55553161 | 55554451 |
| 573 NA19240 | [2515685 chr17 | 17 | 57652724 | 57667804 | 15081  | 18  | 0.529809  | 0.014457 | 57652052 | 57653396 | 57667259 | 57668341 |
| 574 NA19240 | [2515685 chr17 | 17 | 57681793 | 57709501 | 27709  | 58  | 0.529809  | 0.014457 | 57680114 | 57683473 | 57709158 | 57709841 |
| 575 NA19240 | [2515685 chr17 | 17 | 60346613 | 60349141 | 2529   | 2   | -0.597244 | 0.112334 | 60345268 | 60347958 | 60348751 | 60349531 |
| 576 NA19240 | [2515685 chr17 | 17 | 75019369 | 75020755 | 1387   | 3   | -0.316759 | 0.061597 | 75019115 | 75019623 | 75020523 | 75020981 |
| 577 NA19240 | [2515685 chr17 | 17 | 75223639 | 75225100 | 1462   | 4   | -0.309642 | 0.053948 | 75223385 | 75223893 | 75224893 | 75225301 |
| 578 NA19240 | [2515685 chr17 | 17 | 75294896 | 75304766 | 9871   | 3   | 0.5101    | 0.078799 | 75294537 | 75295256 | 75303042 | 75306491 |
| 579 NA19240 | [2515685 chr18 | 18 | 6902997  | 6904611  | 1615   | 2   | -0.742431 | 0.117865 | 6902443  | 6903552  | 6904056  | 6905161  |
| 580 NA19240 | [2515685 chr18 | 18 | 9805250  | 9806206  | 957    | 2   | -0.704739 | 0.107852 | 9804637  | 9805863  | 9806038  | 9806371  |
| 581 NA19240 | [2515685 chr18 | 18 | 12386896 | 12388854 | 1959   | 2   | 0.500409  | 0.087761 | 12386442 | 12387350 | 12388203 | 12389501 |
| 582 NA19240 | [2515685 chr18 | 18 | 14436665 | 14448341 | 11677  | 11  | 0.398923  | 0.042224 | 14436193 | 14437138 | 14448299 | 14448381 |
| 583 NA19240 | [2515685 chr18 | 18 | 14477405 | 14493376 | 15972  | 27  | 0.320451  | 0.026583 | 14477130 | 14477681 | 14493125 | 14493621 |
| 584 NA19240 | [2515685 chr18 | 18 | 28142218 | 28143399 | 1182   | 2   | 0.73072   | 0.119317 | 28141854 | 28142583 | 28143055 | 28143741 |
| 585 NA19240 | [2515685 chr18 | 18 | 36514289 | 36521090 | 6802   | 6   | -0.800037 | 0.06064  | 36513759 | 36514820 | 36520512 | 36521661 |
| 586 NA19240 | [2515685 chr18 | 18 | 42791944 | 42815379 | 23436  | 23  | 0.732511  | 0.028035 | 42749992 | 42796523 | 42810800 | 42889151 |
| 587 NA19240 | [2515685 chr18 | 18 | 61917747 | 61920171 | 2425   | 4   | 2.999477  | 0.138576 | 61917522 | 61917973 | 61919646 | 61920691 |
| 588 NA19240 | [2515685 chr18 | 18 | 63110558 | 63115099 | 4542   | 6   | -0.861075 | 0.06555  | 63110373 | 63110744 | 63114764 | 63115431 |
| 589 NA19240 | [2515685 chr18 | 18 | 74231104 | 74234275 | 3172   | 30  | 0.574163  | 0.019419 | 74230952 | 74231256 | 74234139 | 74234411 |
| 590 NA19240 | [2515685 chr18 | 18 | 74297715 | 74299391 | 1677   | 5   | -0.697177 | 0.066697 | 74297243 | 74298187 | 74299167 | 74299611 |
| 591 NA19240 | [2515685 chr18 | 18 | 74392800 | 74398225 | 5426   | 4   | 0.667635  | 0.075998 | 74390826 | 74394774 | 74397790 | 74398661 |
| 592 NA19240 | [2515685 chr19 | 19 | 291166   | 75792    | 46627  | 25  | 0.400539  | 0.028018 | 28916    | 29416    | 73262    | 79306    |
| 593 NA19240 | [2515685 chr19 | 19 | 310414   | 314479   | 4066   | 15  | -0.678255 | 0.038544 | 309687   | 311142   | 312994   | 315964   |
| 594 NA19240 | [2515685 chr19 | 19 | 331568   | 333129   | 1562   | 2   | 1.818713  | 0.121372 | 331314   | 331822   | 332310   | 333948   |
| 595 NA19240 | [2515685 chr19 | 19 | 22931047 | 22934541 | 3495   | 2   | 0.688862  | 0.10516  | 22918199 | 22933577 | 22934109 | 22934971 |
| 596 NA19240 | [2515685 chr19 | 19 | 23007901 | 23014812 | 6912   | 7   | 0.621113  | 0.0604   | 22990964 | 23010431 | 23014157 | 23015461 |
| 597 NA19240 | [2515685 chr19 | 19 | 23166066 | 23171357 | 5292   | 6   | 0.546373  | 0.061773 | 23165304 | 23166829 | 23170729 | 23171981 |

|             |                |    |          |          |        |     |           |          |          |          |          |          |
|-------------|----------------|----|----------|----------|--------|-----|-----------|----------|----------|----------|----------|----------|
| 598 NA19240 | [2515685 chr19 | 19 | 23227558 | 23230759 | 3202   | 4   | -0.365711 | 0.072259 | 23226708 | 23228409 | 23229991 | 23231527 |
| 599 NA19240 | [2515685 chr19 | 19 | 23257205 | 23258538 | 1334   | 2   | -0.950902 | 0.1212   | 23256882 | 23257529 | 23258213 | 23258866 |
| 600 NA19240 | [2515685 chr19 | 19 | 24147959 | 24148730 | 772    | 3   | -0.672661 | 0.086628 | 24147835 | 24148083 | 24148193 | 24149267 |
| 601 NA19240 | [2515685 chr19 | 19 | 38163201 | 38168256 | 5056   | 2   | 0.592672  | 0.111968 | 38161563 | 38164840 | 38165726 | 38244831 |
| 602 NA19240 | [2515685 chr19 | 19 | 39419234 | 39422498 | 3265   | 5   | 0.562576  | 0.070313 | 39418853 | 39419616 | 39421681 | 39423311 |
| 603 NA19240 | [2515685 chr19 | 19 | 41450184 | 41493615 | 43432  | 28  | 0.718659  | 0.024015 | 41421528 | 41452714 | 41491085 | 41497851 |
| 604 NA19240 | [2515685 chr19 | 19 | 42450470 | 42487512 | 37043  | 33  | 0.718008  | 0.021106 | 42413600 | 42453000 | 42486487 | 42488531 |
| 605 NA19240 | [2515685 chr19 | 19 | 58016218 | 58049937 | 33720  | 31  | 0.314138  | 0.026002 | 58016032 | 58016405 | 58048790 | 58051081 |
| 606 NA19240 | [2515685 chr19 | 19 | 58210435 | 58244458 | 34024  | 26  | -0.693837 | 0.030122 | 58209863 | 58211007 | 58243893 | 58245027 |
| 607 NA19240 | [2515685 chr19 | 19 | 59492384 | 59498950 | 6567   | 7   | 0.348234  | 0.052904 | 59491977 | 59492791 | 59497077 | 59500827 |
| 608 NA19240 | [2515685 chr19 | 19 | 59651834 | 59653230 | 1397   | 2   | 0.610262  | 0.114126 | 59651609 | 59652059 | 59653036 | 59653427 |
| 609 NA19240 | [2515685 chr19 | 19 | 59993327 | 59994476 | 1150   | 2   | -0.643916 | 0.112363 | 59993019 | 59993636 | 59994265 | 59994681 |
| 610 NA19240 | [2515685 chr19 | 19 | 60000767 | 60019599 | 18833  | 17  | -0.498336 | 0.037369 | 60000477 | 60001058 | 60019351 | 60019847 |
| 611 NA19240 | [2515685 chr19 | 19 | 60021398 | 60024627 | 3230   | 5   | -0.332162 | 0.065757 | 60021089 | 60021708 | 60024022 | 60025231 |
| 612 NA19240 | [2515685 chr19 | 19 | 60166764 | 60170745 | 3982   | 2   | 0.481186  | 0.073814 | 60165407 | 60168121 | 60169211 | 60172271 |
| 613 NA19240 | [2515685 chr19 | 19 | 60958920 | 60976029 | 17110  | 15  | -0.792969 | 0.039862 | 60957933 | 60959907 | 60975748 | 60976311 |
| 614 NA19240 | [2515685 chr20 | 20 | 366392   | 369029   | 2638   | 2   | 0.540485  | 0.099723 | 366139   | 366645   | 368098   | 369960   |
| 615 NA19240 | [2515685 chr20 | 20 | 1511097  | 1532477  | 21381  | 26  | -1.821774 | 0.04376  | 1510534  | 1511660  | 1532182  | 1532771  |
| 616 NA19240 | [2515685 chr20 | 20 | 1534463  | 1535141  | 679    | 2   | -0.662967 | 0.099845 | 1534231  | 1534696  | 1534879  | 1535407  |
| 617 NA19240 | [2515685 chr20 | 20 | 26147697 | 26161501 | 13805  | 23  | -0.361046 | 0.029944 | 26147451 | 26147944 | 26161227 | 26161771 |
| 618 NA19240 | [2515685 chr20 | 20 | 58992416 | 58996782 | 4367   | 4   | -0.409677 | 0.06528  | 58992103 | 58992729 | 58996071 | 58997491 |
| 619 NA19240 | [2515685 chr20 | 20 | 62066380 | 62068214 | 1835   | 8   | 1.169631  | 0.053828 | 62066146 | 62066615 | 62067671 | 62068751 |
| 620 NA19240 | [2515685 chr20 | 20 | 62113559 | 62114878 | 1320   | 18  | -0.310578 | 0.035437 | 62113491 | 62113628 | 62114687 | 62115071 |
| 621 NA19240 | [2515685 chr20 | 20 | 62233505 | 62235897 | 2393   | 4   | 0.3129    | 0.055258 | 62232847 | 62234163 | 62235101 | 62236691 |
| 622 NA19240 | [2515685 chr21 | 21 | 10115416 | 10129765 | 14350  | 9   | -0.452302 | 0.047078 | 10115218 | 10115615 | 10128450 | 10131081 |
| 623 NA19240 | [2515685 chr21 | 21 | 10173613 | 10200085 | 26473  | 20  | -0.3536   | 0.031946 | 10173311 | 10173916 | 10198728 | 10201441 |
| 624 NA19240 | [2515685 chr21 | 21 | 13945446 | 13959932 | 14487  | 24  | 0.332754  | 0.028986 | 13945225 | 13945668 | 13959862 | 13960001 |
| 625 NA19240 | [2515685 chr21 | 21 | 14011573 | 14015193 | 3621   | 6   | 0.427212  | 0.055722 | 14011178 | 14011969 | 14014884 | 14015501 |
| 626 NA19240 | [2515685 chr22 | 22 | 14623546 | 14707943 | 84398  | 137 | -0.251355 | 0.011739 | 14623378 | 14623714 | 14707767 | 14708121 |
| 627 NA19240 | [2515685 chr22 | 22 | 17032140 | 17129692 | 97553  | 147 | -0.309437 | 0.011036 | 17031480 | 17032801 | 17129458 | 17129921 |
| 628 NA19240 | [2515685 chr22 | 22 | 17221797 | 17245980 | 24184  | 54  | -0.321248 | 0.018085 | 17221464 | 17222130 | 17245814 | 17246147 |
| 629 NA19240 | [2515685 chr22 | 22 | 18689524 | 18734175 | 44652  | 52  | -0.31594  | 0.018461 | 18686307 | 18692211 | 18733858 | 18734491 |
| 630 NA19240 | [2515685 chr22 | 22 | 18876047 | 18881590 | 5544   | 3   | -0.524646 | 0.060269 | 18875675 | 18876420 | 18878903 | 18934147 |
| 631 NA19240 | [2515685 chr22 | 22 | 18947502 | 19029010 | 81509  | 103 | -0.293627 | 0.01338  | 18947184 | 18947821 | 19028347 | 19029671 |
| 632 NA19240 | [2515685 chr22 | 22 | 19392079 | 19419493 | 27415  | 8   | -0.293099 | 0.050749 | 19391751 | 19392407 | 19416806 | 19449921 |
| 633 NA19240 | [2515685 chr22 | 22 | 19786578 | 19793611 | 7034   | 10  | -0.323815 | 0.046318 | 19786233 | 19786924 | 19793348 | 19793871 |
| 634 NA19240 | [2515685 chr22 | 22 | 19829874 | 19880162 | 50289  | 72  | -0.335342 | 0.01542  | 19829808 | 19829940 | 19879848 | 19880471 |
| 635 NA19240 | [2515685 chr22 | 22 | 19973569 | 20020668 | 47100  | 72  | -0.327936 | 0.015462 | 19972287 | 19974851 | 20020380 | 20020951 |
| 636 NA19240 | [2515685 chr22 | 22 | 22672624 | 22691501 | 18878  | 17  | 0.723345  | 0.024188 | 22672391 | 22672858 | 22691088 | 22691911 |
| 637 NA19240 | [2515685 chr22 | 22 | 22695407 | 22720154 | 24748  | 27  | 0.723345  | 0.024188 | 22695112 | 22695703 | 22719882 | 22720421 |
| 638 NA19240 | [2515685 chr22 | 22 | 22721179 | 22729265 | 8087   | 11  | 0.253108  | 0.042007 | 22720466 | 22721893 | 22728912 | 22729611 |
| 639 NA19240 | [2515685 chr22 | 22 | 29777196 | 29792906 | 15711  | 4   | 0.423294  | 0.06854  | 29693758 | 29779883 | 29790219 | 29838487 |
| 640 NA19240 | [2515685 chr22 | 22 | 33619409 | 33622591 | 3183   | 4   | 0.85907   | 0.075416 | 33618939 | 33619879 | 33622541 | 33622641 |
| 641 NA19240 | [2515685 chr22 | 22 | 49457420 | 49458763 | 1344   | 2   | 0.601177  | 0.096149 | 49457100 | 49457740 | 49458388 | 49459131 |
| 1 NA19007   | [2515685 chr1  | 1  | 44985    | 59097    | 14113  | 25  | 0.342766  | 0.029083 | 44260    | 45710    | 58755    | 59440    |
| 2 NA19007   | [2515685 chr1  | 1  | 500887   | 504345   | 3459   | 6   | 0.344866  | 0.057367 | 500092   | 501683   | 503899   | 504792   |
| 3 NA19007   | [2515685 chr1  | 1  | 586558   | 612159   | 25602  | 15  | -0.504285 | 0.038057 | 586293   | 586824   | 610122   | 614196   |
| 4 NA19007   | [2515685 chr1  | 1  | 1853012  | 1854645  | 1634   | 2   | 0.465573  | 0.089426 | 1852616  | 1853409  | 1853816  | 1855471  |
| 5 NA19007   | [2515685 chr1  | 1  | 12829124 | 12926542 | 97419  | 186 | 0.260347  | 0.00947  | 12828579 | 12829669 | 12926307 | 12926771 |
| 6 NA19007   | [2515685 chr1  | 1  | 12926542 | 12926956 | 415    | 2   | -0.626405 | 0.116026 | 12926307 | 12926778 | 12926804 | 12927101 |
| 7 NA19007   | [2515685 chr1  | 1  | 13120268 | 13166666 | 46399  | 100 | 0.271204  | 0.012219 | 13120033 | 13120504 | 13166599 | 13166731 |
| 8 NA19007   | [2515685 chr1  | 1  | 13185381 | 13198410 | 13030  | 14  | 0.280711  | 0.028683 | 13178206 | 13188653 | 13198244 | 13198571 |
| 9 NA19007   | [2515685 chr1  | 1  | 13349425 | 13387463 | 38039  | 76  | 0.257605  | 0.013409 | 13301339 | 13352697 | 13387396 | 13387531 |
| 10 NA19007  | [2515685 chr1  | 1  | 13406236 | 13419265 | 13030  | 14  | 0.280711  | 0.028683 | 13399000 | 13409508 | 13419099 | 13419431 |
| 11 NA19007  | [2515685 chr1  | 1  | 16604440 | 16946620 | 342181 | 442 | 0.250142  | 0.006574 | 16604025 | 16604856 | 16945727 | 16947511 |



|            |               |   |           |           |        |     |           |          |           |           |           |          |
|------------|---------------|---|-----------|-----------|--------|-----|-----------|----------|-----------|-----------|-----------|----------|
| 12 NA19007 | [2515685 chr1 | 1 | 22055126  | 22087301  | 32176  | 21  | -0.356198 | 0.030504 | 22054832  | 22055421  | 22085966  | 22088637 |
| 13 NA19007 | [2515685 chr1 | 1 | 25330950  | 25409968  | 79019  | 78  | 0.384298  | 0.016265 | 25330662  | 25331238  | 25409763  | 25410177 |
| 14 NA19007 | [2515685 chr1 | 1 | 25434181  | 25487482  | 53302  | 27  | 0.297382  | 0.027917 | 25433990  | 25434373  | 25484210  | 25512937 |
| 15 NA19007 | [2515685 chr1 | 1 | 34744723  | 34749222  | 4500   | 2   | -0.582235 | 0.107217 | 34743552  | 34745895  | 34748292  | 34750157 |
| 16 NA19007 | [2515685 chr1 | 1 | 72478372  | 72524180  | 45809  | 36  | -3.374235 | 0.049473 | 72478140  | 72478604  | 72523661  | 72524701 |
| 17 NA19007 | [2515685 chr1 | 1 | 86112825  | 86116608  | 3784   | 5   | -0.864236 | 0.073518 | 86112582  | 86113069  | 86113649  | 86116867 |
| 18 NA19007 | [2515685 chr1 | 1 | 89188117  | 89190762  | 2646   | 5   | 1.69618   | 0.096284 | 89187764  | 89188470  | 89190458  | 89191067 |
| 19 NA19007 | [2515685 chr1 | 1 | 94869509  | 94870854  | 1346   | 3   | 0.449701  | 0.071151 | 94869219  | 94869799  | 94870647  | 94871106 |
| 20 NA19007 | [2515685 chr1 | 1 | 103827497 | 103834166 | 6670   | 16  | 0.300424  | 0.033481 | 103827175 | 103827820 | 103833999 | 10383433 |
| 21 NA19007 | [2515685 chr1 | 1 | 103848293 | 103866317 | 18025  | 27  | 0.405395  | 0.007662 | 103842566 | 103851565 | 103865345 | 10386729 |
| 22 NA19007 | [2515685 chr1 | 1 | 103873304 | 104015739 | 142436 | 230 | 0.405395  | 0.007662 | 103873021 | 103873587 | 104013178 | 10401830 |
| 23 NA19007 | [2515685 chr1 | 1 | 104045848 | 104053321 | 7474   | 11  | -0.862562 | 0.047829 | 104045139 | 104046558 | 104053000 | 10405364 |
| 24 NA19007 | [2515685 chr1 | 1 | 105728161 | 105735462 | 7302   | 8   | -0.992368 | 0.060247 | 105727820 | 105728503 | 105734532 | 10573639 |
| 25 NA19007 | [2515685 chr1 | 1 | 105862636 | 105864295 | 1660   | 2   | -0.559507 | 0.101702 | 105862373 | 105862900 | 105864051 | 10586454 |
| 26 NA19007 | [2515685 chr1 | 1 | 108444641 | 108449550 | 4910   | 9   | 0.75348   | 0.050613 | 108443817 | 108445466 | 108449224 | 10844987 |
| 27 NA19007 | [2515685 chr1 | 1 | 108514938 | 108550116 | 35179  | 53  | 0.401271  | 0.020403 | 108514864 | 108515012 | 108549650 | 10855058 |
| 28 NA19007 | [2515685 chr1 | 1 | 108638096 | 108688767 | 50672  | 60  | 0.394729  | 0.01914  | 108637939 | 108638254 | 108688693 | 10868884 |
| 29 NA19007 | [2515685 chr1 | 1 | 120244720 | 120342422 | 97703  | 151 | 0.264559  | 0.011559 | 120243262 | 120246178 | 120342303 | 12034254 |
| 30 NA19007 | [2515685 chr1 | 1 | 141876697 | 141877606 | 910    | 2   | -0.523809 | 0.099341 | 141876675 | 141876720 | 141877195 | 14187801 |
| 31 NA19007 | [2515685 chr1 | 1 | 141902344 | 142030551 | 128208 | 188 | 0.255743  | 0.008805 | 141902175 | 141902514 | 142030102 | 14203100 |
| 32 NA19007 | [2515685 chr1 | 1 | 142096128 | 142096822 | 695    | 2   | 0.555951  | 0.082093 | 142095585 | 142096671 | 142096672 | 14209697 |
| 33 NA19007 | [2515685 chr1 | 1 | 142438646 | 142569435 | 130790 | 159 | 0.335994  | 0.011495 | 142438189 | 142439104 | 142568775 | 14257009 |
| 34 NA19007 | [2515685 chr1 | 1 | 145039335 | 145115191 | 75857  | 185 | 0.262912  | 0.008976 | 145039090 | 145039580 | 145114700 | 14511568 |
| 35 NA19007 | [2515685 chr1 | 1 | 145386725 | 145399341 | 12617  | 29  | 0.319862  | 0.021507 | 145385828 | 145387623 | 145399181 | 14539950 |
| 36 NA19007 | [2515685 chr1 | 1 | 145548753 | 145561369 | 12617  | 28  | 0.321241  | 0.021856 | 145547856 | 145549650 | 145561209 | 14556153 |
| 37 NA19007 | [2515685 chr1 | 1 | 146331954 | 146341151 | 9198   | 28  | 0.402853  | 0.022255 | 146331906 | 146332002 | 146341146 | 14634115 |
| 38 NA19007 | [2515685 chr1 | 1 | 146389143 | 146391476 | 2334   | 6   | 0.519321  | 0.050809 | 146388901 | 146389385 | 146391229 | 14639172 |
| 39 NA19007 | [2515685 chr1 | 1 | 146430129 | 146431026 | 898    | 2   | -0.523824 | 0.099342 | 146429730 | 146430528 | 146431003 | 14643104 |
| 40 NA19007 | [2515685 chr1 | 1 | 148144685 | 148222098 | 77414  | 81  | 0.54345   | 0.016246 | 148142960 | 148146411 | 148220778 | 14822341 |
| 41 NA19007 | [2515685 chr1 | 1 | 148998878 | 149000518 | 7041   | 13  | -0.25797  | 0.030659 | 148998401 | 148999355 | 149004680 | 14900715 |
| 42 NA19007 | [2515685 chr1 | 1 | 149456845 | 149459738 | 2894   | 5   | -0.646279 | 0.067012 | 149456400 | 149457291 | 149459421 | 14946005 |
| 43 NA19007 | [2515685 chr1 | 1 | 149573040 | 149583431 | 10392  | 6   | 0.933035  | 0.06852  | 149572621 | 149573460 | 149582912 | 14958395 |
| 44 NA19007 | [2515685 chr1 | 1 | 171527310 | 171533429 | 6120   | 6   | -0.846788 | 0.064888 | 171526198 | 171528423 | 171533245 | 17153361 |
| 45 NA19007 | [2515685 chr1 | 1 | 218762650 | 218771442 | 8793   | 8   | 0.552166  | 0.054281 | 218762212 | 218763089 | 218771135 | 21877175 |
| 46 NA19007 | [2515685 chr1 | 1 | 231219104 | 231264133 | 45030  | 50  | 0.31777   | 0.02075  | 231218806 | 231219402 | 231263654 | 23126461 |
| 47 NA19007 | [2515685 chr1 | 1 | 236719047 | 236720968 | 1922   | 3   | -4.018011 | 0.174741 | 236718751 | 236719344 | 236720749 | 23672118 |
| 48 NA19007 | [2515685 chr1 | 1 | 244872415 | 244874098 | 1684   | 5   | -0.44592  | 0.069683 | 244872245 | 244872585 | 244873799 | 24487439 |
| 49 NA19007 | [2515685 chr2 | 2 | 296456    | 298925    | 2470   | 8   | -0.626925 | 0.054297 | 296213    | 296699    | 298661    | 299185   |
| 50 NA19007 | [2515685 chr2 | 2 | 388500    | 391649    | 3150   | 7   | -0.624475 | 0.056828 | 387915    | 389086    | 391236    | 392063   |
| 51 NA19007 | [2515685 chr2 | 2 | 36245925  | 36253910  | 7986   | 4   | -1.015925 | 0.084337 | 36243469  | 36248382  | 36250956  | 36257551 |
| 52 NA19007 | [2515685 chr2 | 2 | 37869648  | 37911473  | 41826  | 43  | -0.434593 | 0.021954 | 37869077  | 37870220  | 37911214  | 37911737 |
| 53 NA19007 | [2515685 chr2 | 2 | 52661573  | 52696869  | 35297  | 26  | -3.794648 | 0.060718 | 52661218  | 52661928  | 52696416  | 52697327 |
| 54 NA19007 | [2515685 chr2 | 2 | 56563623  | 56567381  | 3759   | 2   | 3.932446  | 0.23583  | 56556559  | 56566577  | 56567035  | 56567721 |
| 55 NA19007 | [2515685 chr2 | 2 | 66416834  | 66420210  | 3377   | 2   | -0.85774  | 0.098507 | 66416385  | 66417284  | 66419065  | 66421351 |
| 56 NA19007 | [2515685 chr2 | 2 | 67235911  | 67240574  | 4664   | 5   | -0.76348  | 0.065669 | 67235223  | 67236600  | 67240226  | 67240927 |
| 57 NA19007 | [2515685 chr2 | 2 | 73750084  | 73752475  | 2392   | 2   | 0.597458  | 0.105287 | 73749836  | 73750332  | 73752120  | 73752831 |
| 58 NA19007 | [2515685 chr2 | 2 | 73922874  | 73948487  | 25614  | 41  | -0.306039 | 0.015674 | 73922730  | 73923019  | 73948060  | 73948911 |
| 59 NA19007 | [2515685 chr2 | 2 | 75296507  | 75298934  | 2428   | 2   | 0.942067  | 0.106959 | 75296056  | 75296959  | 75298532  | 75299331 |
| 60 NA19007 | [2515685 chr2 | 2 | 77806315  | 77826942  | 20628  | 23  | 0.295768  | 0.030533 | 77805250  | 77807380  | 77824671  | 77829217 |
| 61 NA19007 | [2515685 chr2 | 2 | 86854232  | 86939507  | 85276  | 14  | 0.291747  | 0.036614 | 86852646  | 86855818  | 86936553  | 86996011 |
| 62 NA19007 | [2515685 chr2 | 2 | 87044462  | 87063085  | 18624  | 28  | 0.326583  | 0.023169 | 87044084  | 87044841  | 87061776  | 87064397 |
| 63 NA19007 | [2515685 chr2 | 2 | 87188973  | 87256990  | 68018  | 66  | 0.306344  | 0.01778  | 87188710  | 87189237  | 87256381  | 87257597 |
| 64 NA19007 | [2515685 chr2 | 2 | 88117636  | 88126839  | 9204   | 15  | 0.343791  | 0.035255 | 88116083  | 88119190  | 88126458  | 88127221 |
| 65 NA19007 | [2515685 chr2 | 2 | 97184386  | 97189736  | 5351   | 2   | -0.764863 | 0.102507 | 97182781  | 97185992  | 97186782  | 97196727 |
| 66 NA19007 | [2515685 chr2 | 2 | 97239075  | 97243328  | 4254   | 3   | -0.455526 | 0.090551 | 97238592  | 97239558  | 97243113  | 97243547 |

|             |               |   |           |           |       |     |           |          |           |           |           |          |
|-------------|---------------|---|-----------|-----------|-------|-----|-----------|----------|-----------|-----------|-----------|----------|
| 67 NA19007  | [2515685 chr2 | 2 | 97281294  | 97297647  | 16354 | 26  | -0.306815 | 0.027635 | 97281091  | 97281497  | 97297385  | 97297910 |
| 68 NA19007  | [2515685 chr2 | 2 | 97585284  | 97603109  | 17826 | 16  | 0.259881  | 0.036953 | 97585036  | 97585532  | 97600155  | 97606601 |
| 69 NA19007  | [2515685 chr2 | 2 | 97613796  | 97614932  | 1137  | 2   | 1.755492  | 0.138064 | 97613553  | 97614040  | 97614467  | 97615391 |
| 70 NA19007  | [2515685 chr2 | 2 | 106340108 | 106344320 | 4213  | 5   | -0.556571 | 0.069312 | 106339864 | 106340353 | 106344055 | 10634458 |
| 71 NA19007  | [2515685 chr2 | 2 | 108313968 | 108314875 | 908   | 2   | 0.793409  | 0.108872 | 108313664 | 108314272 | 108314680 | 10831507 |
| 72 NA19007  | [2515685 chr2 | 2 | 126159437 | 126168349 | 8913  | 3   | -3.741486 | 0.164677 | 126158494 | 126160381 | 126168048 | 12616865 |
| 73 NA19007  | [2515685 chr2 | 2 | 129354604 | 129357050 | 2447  | 3   | -1.02883  | 0.105569 | 129354317 | 129354892 | 129356442 | 12935765 |
| 74 NA19007  | [2515685 chr2 | 2 | 130686291 | 130688259 | 1969  | 3   | 0.446785  | 0.080426 | 130686043 | 130686540 | 130687952 | 13068856 |
| 75 NA19007  | [2515685 chr2 | 2 | 131765080 | 131790447 | 25368 | 40  | -0.29453  | 0.022443 | 131749458 | 131768034 | 131790149 | 13179074 |
| 76 NA19007  | [2515685 chr2 | 2 | 132042489 | 132045329 | 2841  | 2   | -0.590454 | 0.095315 | 132042142 | 132042837 | 132045143 | 13204551 |
| 77 NA19007  | [2515685 chr2 | 2 | 132142907 | 132181874 | 38968 | 27  | -0.272928 | 0.028217 | 132141027 | 132144787 | 132181809 | 13218194 |
| 78 NA19007  | [2515685 chr2 | 2 | 132274529 | 132313197 | 38669 | 39  | -0.310501 | 0.022167 | 132273872 | 132275187 | 132312229 | 13231416 |
| 79 NA19007  | [2515685 chr2 | 2 | 132871605 | 132881178 | 9574  | 13  | 0.455703  | 0.04352  | 132871306 | 132871904 | 132880751 | 13288160 |
| 80 NA19007  | [2515685 chr2 | 2 | 153622711 | 153625256 | 2546  | 3   | 0.907701  | 0.092333 | 153621175 | 153624247 | 153625088 | 15362542 |
| 81 NA19007  | [2515685 chr2 | 2 | 208176479 | 208184457 | 7979  | 7   | 0.920032  | 0.060374 | 208176093 | 208176865 | 208183930 | 20818498 |
| 82 NA19007  | [2515685 chr2 | 2 | 232512469 | 232537143 | 24675 | 6   | -0.556348 | 0.04156  | 232511142 | 232513796 | 232534243 | 23254004 |
| 83 NA19007  | [2515685 chr2 | 2 | 242664580 | 242668683 | 4104  | 10  | 0.726266  | 0.037223 | 242664284 | 242664877 | 242668532 | 24266883 |
| 84 NA19007  | [2515685 chr3 | 3 | 154057    | 157210    | 3154  | 3   | -0.511082 | 0.07901  | 153604    | 154511    | 156642    | 157775   |
| 85 NA19007  | [2515685 chr3 | 3 | 1757211   | 1765706   | 8496  | 2   | 0.750694  | 0.114998 | 1756096   | 1758327   | 1762058   | 179730   |
| 86 NA19007  | [2515685 chr3 | 3 | 16213841  | 16216543  | 2703  | 2   | -0.53151  | 0.096204 | 16213419  | 16214264  | 16215641  | 16217441 |
| 87 NA19007  | [2515685 chr3 | 3 | 47798187  | 47807138  | 8952  | 8   | 0.291449  | 0.049999 | 47797874  | 47798501  | 47806226  | 4780805  |
| 88 NA19007  | [2515685 chr3 | 3 | 50888459  | 50888513  | 55    | 2   | 0.734815  | 0.114033 | 50888445  | 50888474  | 50888495  | 5088853  |
| 89 NA19007  | [2515685 chr3 | 3 | 61114481  | 61116761  | 2281  | 4   | 0.447092  | 0.08215  | 61114254  | 61114708  | 61116471  | 6111705  |
| 90 NA19007  | [2515685 chr3 | 3 | 68821474  | 68830847  | 9374  | 17  | -2.734006 | 0.062321 | 68818894  | 68824055  | 68830417  | 6883127  |
| 91 NA19007  | [2515685 chr3 | 3 | 76066312  | 76081451  | 15140 | 19  | -0.347652 | 0.033213 | 76065787  | 76066838  | 76081180  | 7608172  |
| 92 NA19007  | [2515685 chr3 | 3 | 89475490  | 89501873  | 26384 | 23  | -0.930552 | 0.031723 | 89473967  | 89477014  | 89500962  | 8950278  |
| 93 NA19007  | [2515685 chr3 | 3 | 106127289 | 106128660 | 1372  | 2   | -0.881525 | 0.095786 | 106126821 | 106127758 | 106128182 | 10612913 |
| 94 NA19007  | [2515685 chr3 | 3 | 141750174 | 141752798 | 2625  | 4   | -0.458781 | 0.085525 | 141749720 | 141750628 | 141752415 | 14175318 |
| 95 NA19007  | [2515685 chr3 | 3 | 156042614 | 156043843 | 1230  | 2   | -0.599819 | 0.107004 | 156042074 | 156043154 | 156043483 | 15604420 |
| 96 NA19007  | [2515685 chr3 | 3 | 161838609 | 161848881 | 10273 | 12  | -0.949248 | 0.042184 | 161838322 | 161838896 | 161848436 | 16184932 |
| 97 NA19007  | [2515685 chr3 | 3 | 164081191 | 164085309 | 4119  | 6   | -0.704706 | 0.100209 | 164080898 | 164081485 | 164085138 | 16408548 |
| 98 NA19007  | [2515685 chr3 | 3 | 164199936 | 164205886 | 5951  | 6   | -0.846688 | 0.070939 | 164199686 | 164200187 | 164204674 | 16420709 |
| 99 NA19007  | [2515685 chr3 | 3 | 166775682 | 166805300 | 29619 | 16  | -0.871409 | 0.041583 | 166766310 | 166779330 | 166804547 | 16680605 |
| 100 NA19007 | [2515685 chr3 | 3 | 191219813 | 191223326 | 3514  | 4   | 0.812171  | 0.075934 | 191219291 | 191220336 | 191222918 | 19122373 |
| 101 NA19007 | [2515685 chr3 | 3 | 192547312 | 192554331 | 7020  | 10  | 0.873872  | 0.052047 | 192546950 | 192547674 | 192554127 | 19255453 |
| 102 NA19007 | [2515685 chr3 | 3 | 196679304 | 196713768 | 34465 | 36  | 0.781266  | 0.020028 | 196677636 | 196680972 | 196711768 | 19671576 |
| 103 NA19007 | [2515685 chr3 | 3 | 196946678 | 196958848 | 12171 | 10  | -0.546536 | 0.047359 | 196946096 | 196947261 | 196956437 | 19696126 |
| 104 NA19007 | [2515685 chr3 | 3 | 196994475 | 197002965 | 8491  | 10  | 0.889472  | 0.046283 | 196994054 | 196994896 | 197002044 | 19700388 |
| 105 NA19007 | [2515685 chr3 | 3 | 198421889 | 198427408 | 5520  | 3   | 0.845685  | 0.088789 | 198421397 | 198422381 | 198423959 | 19843085 |
| 106 NA19007 | [2515685 chr3 | 3 | 199218619 | 199221999 | 3381  | 12  | -0.496838 | 0.047072 | 199218354 | 199218884 | 199220440 | 19922355 |
| 107 NA19007 | [2515685 chr3 | 3 | 199313925 | 199321063 | 7139  | 15  | -0.287701 | 0.029584 | 199313515 | 199314336 | 199320844 | 19932128 |
| 108 NA19007 | [2515685 chr3 | 3 | 199383694 | 199384627 | 934   | 4   | -0.575806 | 0.084773 | 199383507 | 199383882 | 199384512 | 19938474 |
| 109 NA19007 | [2515685 chr4 | 4 | 8998173   | 9046719   | 48547 | 77  | 0.817332  | 0.011704 | 8850774   | 9001243   | 9046129   | 9047305  |
| 110 NA19007 | [2515685 chr4 | 4 | 9795329   | 9796277   | 949   | 2   | -0.565287 | 0.108385 | 9794973   | 9795685   | 9796054   | 979650   |
| 111 NA19007 | [2515685 chr4 | 4 | 9812346   | 9813108   | 763   | 33  | 0.672674  | 0.018983 | 9812284   | 9812408   | 9812952   | 9813265  |
| 112 NA19007 | [2515685 chr4 | 4 | 9887220   | 9911397   | 24178 | 29  | 2.562047  | 0.049371 | 9886886   | 9887555   | 9910388   | 991240   |
| 113 NA19007 | [2515685 chr4 | 4 | 21045633  | 21053532  | 7900  | 8   | -1.093176 | 0.058844 | 21045231  | 21046035  | 21053115  | 2105395  |
| 114 NA19007 | [2515685 chr4 | 4 | 28986814  | 28993275  | 6462  | 7   | -1.013994 | 0.063669 | 28986458  | 28987171  | 28991912  | 2899463  |
| 115 NA19007 | [2515685 chr4 | 4 | 34604376  | 34650994  | 46619 | 44  | 0.843281  | 0.024203 | 34601994  | 34606759  | 34649535  | 3465245  |
| 116 NA19007 | [2515685 chr4 | 4 | 49080370  | 49080863  | 494   | 2   | -0.644792 | 0.103902 | 49079937  | 49080803  | 49080804  | 4908092  |
| 117 NA19007 | [2515685 chr4 | 4 | 49119758  | 49176391  | 56634 | 193 | 0.454768  | 0.008732 | 49117775  | 49121741  | 49174409  | 4917837  |
| 118 NA19007 | [2515685 chr4 | 4 | 49353231  | 49361409  | 8179  | 14  | 0.5003    | 0.032591 | 49352892  | 49353570  | 49359431  | 4936338  |
| 119 NA19007 | [2515685 chr4 | 4 | 49400450  | 49400601  | 152   | 2   | -0.644792 | 0.103902 | 49400386  | 49400515  | 49400516  | 4940068  |
| 120 NA19007 | [2515685 chr4 | 4 | 58094441  | 58103329  | 8889  | 9   | -0.811315 | 0.051245 | 58090798  | 58097511  | 58102479  | 5810418  |
| 121 NA19007 | [2515685 chr4 | 4 | 66474954  | 66478728  | 3775  | 5   | -0.35846  | 0.064576 | 66474942  | 66474966  | 66478106  | 6647935  |

|             |               |   |           |           |        |      |           |          |           |           |           |           |
|-------------|---------------|---|-----------|-----------|--------|------|-----------|----------|-----------|-----------|-----------|-----------|
| 122 NA19007 | [2515685 chr4 | 4 | 70299503  | 70417223  | 117721 | 116  | 0.418528  | 0.013943 | 70299268  | 70299739  | 70416364  | 7041808:  |
| 123 NA19007 | [2515685 chr4 | 4 | 89276475  | 89280414  | 3940   | 4    | -0.526079 | 0.079577 | 89276106  | 89276844  | 89280092  | 8928073:  |
| 124 NA19007 | [2515685 chr4 | 4 | 115534206 | 115541546 | 7341   | 9    | 0.878172  | 0.055059 | 115530015 | 115537276 | 115539984 | 11554310  |
| 125 NA19007 | [2515685 chr4 | 4 | 116524394 | 116534652 | 10259  | 12   | -0.985075 | 0.04517  | 116523990 | 116524798 | 116534384 | 11653492  |
| 126 NA19007 | [2515685 chr4 | 4 | 122639779 | 122647776 | 7998   | 6    | -0.884207 | 0.064833 | 122639003 | 122640555 | 122647404 | 12264814  |
| 127 NA19007 | [2515685 chr4 | 4 | 124614626 | 125613431 | 998806 | 1013 | 0.520063  | 0.004677 | 124607299 | 124617696 | 125613132 | 12561373  |
| 128 NA19007 | [2515685 chr4 | 4 | 138537751 | 138549906 | 12156  | 14   | 0.910458  | 0.043602 | 138537443 | 138538059 | 138547414 | 13855239  |
| 129 NA19007 | [2515685 chr4 | 4 | 142588136 | 142590500 | 2365   | 4    | -0.892445 | 0.07957  | 142587774 | 142588498 | 142590303 | 14259069  |
| 130 NA19007 | [2515685 chr4 | 4 | 145240980 | 145245588 | 4609   | 4    | -0.739244 | 0.084451 | 145240473 | 145241488 | 145245192 | 14524598  |
| 131 NA19007 | [2515685 chr4 | 4 | 162806038 | 162809269 | 3232   | 3    | 0.967276  | 0.068547 | 162804872 | 162807204 | 162808734 | 16280980  |
| 132 NA19007 | [2515685 chr4 | 4 | 169184442 | 169368370 | 183929 | 162  | 0.84521   | 0.0123   | 169184090 | 169184794 | 169366713 | 16937002  |
| 133 NA19007 | [2515685 chr4 | 4 | 173799832 | 173807325 | 7494   | 6    | -3.886784 | 0.145467 | 173799464 | 173800201 | 173804255 | 17381134  |
| 134 NA19007 | [2515685 chr4 | 4 | 185533276 | 185544849 | 11574  | 12   | 0.903267  | 0.046359 | 185532696 | 185533857 | 185543276 | 18554642  |
| 135 NA19007 | [2515685 chr4 | 4 | 187728494 | 187732907 | 4414   | 15   | 2.45607   | 0.057211 | 187728193 | 187728795 | 187732541 | 18773327: |
| 136 NA19007 | [2515685 chr4 | 4 | 188255523 | 188269680 | 14158  | 235  | 0.375662  | 0.008649 | 188255215 | 188255831 | 188269403 | 18826995  |
| 137 NA19007 | [2515685 chr4 | 4 | 190528602 | 190533163 | 4562   | 21   | -0.978748 | 0.033394 | 190528058 | 190529146 | 190531664 | 19053466  |
| 138 NA19007 | [2515685 chr4 | 4 | 190934110 | 190936895 | 2786   | 2    | 0.632336  | 0.109632 | 190933886 | 190934335 | 190936455 | 19093733  |
| 139 NA19007 | [2515685 chr4 | 4 | 190941429 | 190942794 | 1366   | 3    | 0.394261  | 0.066831 | 190941038 | 190941820 | 190942354 | 19094323: |
| 140 NA19007 | [2515685 chr5 | 5 | 520743    | 521684    | 942    | 5    | 0.666316  | 0.075204 | 520428    | 521059    | 521427    | 521942    |
| 141 NA19007 | [2515685 chr5 | 5 | 731032    | 901723    | 170692 | 157  | 0.40148   | 0.010944 | 730880    | 731185    | 901319    | 902127    |
| 142 NA19007 | [2515685 chr5 | 5 | 1223248   | 1223930   | 683    | 5    | 1.528885  | 0.067797 | 1223057   | 1223439   | 1223854   | 1224007   |
| 143 NA19007 | [2515685 chr5 | 5 | 3711017   | 3713468   | 2452   | 3    | -1.059353 | 0.093406 | 3710011   | 3712024   | 3713223   | 371371:   |
| 144 NA19007 | [2515685 chr5 | 5 | 5161177   | 5162841   | 1665   | 2    | -0.935391 | 0.107308 | 5160264   | 5162091   | 5162645   | 516303:   |
| 145 NA19007 | [2515685 chr5 | 5 | 17570617  | 17643104  | 72488  | 331  | -0.317927 | 0.006128 | 17570551  | 17570684  | 17642455  | 1764375:  |
| 146 NA19007 | [2515685 chr5 | 5 | 17664339  | 17667407  | 3069   | 7    | -0.281866 | 0.04747  | 17663984  | 17664695  | 17667174  | 1766764:  |
| 147 NA19007 | [2515685 chr5 | 5 | 19410747  | 19412172  | 1426   | 3    | 0.673477  | 0.083629 | 19410189  | 19411305  | 19411980  | 1941236:  |
| 148 NA19007 | [2515685 chr5 | 5 | 21483394  | 21488147  | 4754   | 4    | -0.843684 | 0.073295 | 21480817  | 21485972  | 21487855  | 2148843:  |
| 149 NA19007 | [2515685 chr5 | 5 | 26831997  | 26837938  | 5942   | 6    | 0.74929   | 0.064734 | 26829858  | 26834136  | 26837469  | 2683840:  |
| 150 NA19007 | [2515685 chr5 | 5 | 32295710  | 32297985  | 2276   | 2    | -0.991341 | 0.113458 | 32295082  | 32296338  | 32296746  | 3229922:  |
| 151 NA19007 | [2515685 chr5 | 5 | 69116586  | 69124778  | 8193   | 26   | 0.274033  | 0.020371 | 69116357  | 69116816  | 69124771  | 6912478:  |
| 152 NA19007 | [2515685 chr5 | 5 | 69270634  | 69510718  | 240085 | 384  | 0.284097  | 0.005844 | 69270579  | 69270689  | 69510624  | 6951081:  |
| 153 NA19007 | [2515685 chr5 | 5 | 69966316  | 69976828  | 10513  | 31   | 0.260691  | 0.018848 | 69965960  | 69966672  | 69976597  | 6997706:  |
| 154 NA19007 | [2515685 chr5 | 5 | 70145430  | 70309397  | 163968 | 212  | 0.301785  | 0.007732 | 70145132  | 70145729  | 70308614  | 7031018:  |
| 155 NA19007 | [2515685 chr5 | 5 | 70462481  | 70511908  | 49428  | 99   | 0.278413  | 0.011622 | 70462385  | 70462578  | 70511607  | 7051221:  |
| 156 NA19007 | [2515685 chr5 | 5 | 81459209  | 81466059  | 6851   | 2    | -1.453899 | 0.121586 | 81455614  | 81462405  | 81462863  | 8147028:  |
| 157 NA19007 | [2515685 chr5 | 5 | 85489493  | 85493711  | 4219   | 4    | -0.414413 | 0.078546 | 85488846  | 85490140  | 85492888  | 8549453:  |
| 158 NA19007 | [2515685 chr5 | 5 | 97465497  | 97467027  | 1531   | 3    | -0.548233 | 0.090073 | 97465358  | 97465637  | 97466801  | 9746725:  |
| 159 NA19007 | [2515685 chr5 | 5 | 98692416  | 98694362  | 1947   | 3    | 0.432501  | 0.080572 | 98691745  | 98693087  | 98694014  | 9869471:  |
| 160 NA19007 | [2515685 chr5 | 5 | 122649189 | 122651412 | 2224   | 3    | 0.69647   | 0.090455 | 122648933 | 122649446 | 122650032 | 12265279  |
| 161 NA19007 | [2515685 chr5 | 5 | 137835178 | 137844134 | 8957   | 8    | 0.704643  | 0.057487 | 137834745 | 137835611 | 137843310 | 13784495  |
| 162 NA19007 | [2515685 chr5 | 5 | 140194263 | 140195892 | 1630   | 3    | 0.471861  | 0.086557 | 140193978 | 140194548 | 140194581 | 14019597  |
| 163 NA19007 | [2515685 chr5 | 5 | 140203081 | 140218928 | 15848  | 20   | 2.4873    | 0.057573 | 140202344 | 140203819 | 140218508 | 14021934  |
| 164 NA19007 | [2515685 chr5 | 5 | 140534849 | 140540106 | 5258   | 5    | 1.053748  | 0.072063 | 140534700 | 140534999 | 140539007 | 14054120  |
| 165 NA19007 | [2515685 chr5 | 5 | 180275137 | 180280231 | 5095   | 5    | -0.351624 | 0.070273 | 180273651 | 180276623 | 180277035 | 18028376  |
| 166 NA19007 | [2515685 chr5 | 5 | 180308453 | 180363417 | 54965  | 54   | 0.652255  | 0.020937 | 180308218 | 180308688 | 180363120 | 18036371  |
| 167 NA19007 | [2515685 chr5 | 5 | 180821687 | 180825145 | 3459   | 5    | 0.348524  | 0.063509 | 180820892 | 180822483 | 180824699 | 18082559  |
| 168 NA19007 | [2515685 chr6 | 6 | 201823    | 327656    | 125834 | 129  | 0.385457  | 0.012608 | 201415    | 202232    | 326993    | 328320    |
| 169 NA19007 | [2515685 chr6 | 6 | 5891568   | 5893211   | 1644   | 2    | 0.577995  | 0.11419  | 5890979   | 5892158   | 5892663   | 589375:   |
| 170 NA19007 | [2515685 chr6 | 6 | 26847749  | 26850078  | 2330   | 2    | -0.646668 | 0.111088 | 26846249  | 26849250  | 26849750  | 2685040:  |
| 171 NA19007 | [2515685 chr6 | 6 | 26860417  | 26861511  | 1095   | 2    | -0.827043 | 0.098499 | 26860088  | 26860746  | 26861212  | 2686181:  |
| 172 NA19007 | [2515685 chr6 | 6 | 29954251  | 30017868  | 63618  | 56   | 0.544542  | 0.020216 | 29950833  | 29957670  | 30017587  | 3001814:  |
| 173 NA19007 | [2515685 chr6 | 6 | 30051460  | 30052527  | 1068   | 3    | 0.41495   | 0.079152 | 30051232  | 30051688  | 30052363  | 3005269:  |
| 174 NA19007 | [2515685 chr6 | 6 | 31383567  | 31386100  | 2534   | 3    | -0.966541 | 0.099422 | 31383185  | 31383949  | 31385806  | 3138639:  |
| 175 NA19007 | [2515685 chr6 | 6 | 31497531  | 31515665  | 18135  | 3    | -0.436277 | 0.085257 | 31497288  | 31497774  | 31515350  | 3151598:  |
| 176 NA19007 | [2515685 chr6 | 6 | 32557802  | 32558865  | 1064   | 2    | 0.899581  | 0.120267 | 32557647  | 32557958  | 32558698  | 3255903:  |

|             |               |   |           |           |        |     |           |          |           |           |           |          |
|-------------|---------------|---|-----------|-----------|--------|-----|-----------|----------|-----------|-----------|-----------|----------|
| 177 NA19007 | [2515685 chr6 | 6 | 32561866  | 32588830  | 26965  | 9   | -0.535044 | 0.075524 | 32560230  | 32563503  | 32588323  | 32589331 |
| 178 NA19007 | [2515685 chr6 | 6 | 32589957  | 32592537  | 2581   | 4   | -0.610555 | 0.08399  | 32589338  | 32590576  | 32591896  | 32593171 |
| 179 NA19007 | [2515685 chr6 | 6 | 32603035  | 32632349  | 29315  | 22  | -0.506059 | 0.032797 | 32601735  | 32604335  | 32632089  | 32632611 |
| 180 NA19007 | [2515685 chr6 | 6 | 32652938  | 32653862  | 925    | 2   | -0.543415 | 0.094996 | 32652689  | 32653188  | 32653679  | 32654041 |
| 181 NA19007 | [2515685 chr6 | 6 | 32657916  | 32659325  | 1410   | 2   | -0.908251 | 0.150648 | 32657216  | 32658616  | 32658959  | 32659691 |
| 182 NA19007 | [2515685 chr6 | 6 | 32666229  | 32667673  | 1445   | 3   | 0.626241  | 0.081451 | 32665899  | 32666560  | 32667507  | 32667831 |
| 183 NA19007 | [2515685 chr6 | 6 | 32678696  | 32680751  | 2056   | 3   | 0.920068  | 0.097387 | 32678507  | 32678885  | 32680547  | 32680951 |
| 184 NA19007 | [2515685 chr6 | 6 | 32702716  | 32705737  | 3022   | 3   | -0.600877 | 0.073772 | 32702285  | 32703148  | 32704019  | 32707451 |
| 185 NA19007 | [2515685 chr6 | 6 | 32711084  | 32744064  | 32981  | 38  | 0.413357  | 0.025574 | 32710454  | 32711715  | 32743578  | 32744551 |
| 186 NA19007 | [2515685 chr6 | 6 | 32775535  | 32777812  | 2278   | 3   | 0.591304  | 0.094191 | 32775260  | 32775810  | 32777125  | 32778491 |
| 187 NA19007 | [2515685 chr6 | 6 | 32799020  | 32800744  | 1725   | 2   | 0.54304   | 0.105941 | 32798752  | 32799289  | 32800576  | 32800911 |
| 188 NA19007 | [2515685 chr6 | 6 | 35862833  | 35879904  | 17072  | 16  | 0.513019  | 0.036136 | 35862530  | 35863136  | 35879292  | 35880511 |
| 189 NA19007 | [2515685 chr6 | 6 | 54036900  | 54042384  | 5485   | 5   | 4.710713  | 0.16426  | 54036573  | 54037227  | 54041771  | 54042991 |
| 190 NA19007 | [2515685 chr6 | 6 | 63656044  | 63658372  | 2329   | 3   | -0.478069 | 0.080182 | 63655444  | 63656644  | 63658061  | 63658681 |
| 191 NA19007 | [2515685 chr6 | 6 | 66455162  | 66461833  | 6672   | 5   | -0.858354 | 0.074996 | 66454046  | 66456278  | 66461410  | 66462251 |
| 192 NA19007 | [2515685 chr6 | 6 | 74651062  | 74652350  | 1289   | 2   | 0.478741  | 0.092859 | 74650911  | 74651214  | 74651966  | 74652731 |
| 193 NA19007 | [2515685 chr6 | 6 | 77495034  | 77513514  | 18481  | 12  | 0.828352  | 0.047285 | 77493568  | 77496500  | 77510011  | 77517691 |
| 194 NA19007 | [2515685 chr6 | 6 | 79023318  | 79093263  | 69946  | 69  | 0.833648  | 0.018608 | 79022028  | 79024609  | 79091909  | 79094611 |
| 195 NA19007 | [2515685 chr6 | 6 | 81338144  | 81350271  | 12128  | 11  | -1.026751 | 0.048731 | 81334276  | 81341647  | 81350013  | 81350531 |
| 196 NA19007 | [2515685 chr6 | 6 | 95345535  | 95349338  | 3804   | 5   | -0.883156 | 0.073539 | 95345072  | 95345998  | 95348106  | 95350571 |
| 197 NA19007 | [2515685 chr6 | 6 | 103844685 | 103871201 | 26517  | 16  | 2.954667  | 0.074052 | 103844347 | 103845023 | 103868241 | 10387416 |
| 198 NA19007 | [2515685 chr6 | 6 | 120671191 | 120671916 | 726    | 2   | 1.010306  | 0.108816 | 120670696 | 120671686 | 120671725 | 12067210 |
| 199 NA19007 | [2515685 chr6 | 6 | 161001907 | 161038394 | 36488  | 62  | 0.464563  | 0.013016 | 161001167 | 161002648 | 161038184 | 16103860 |
| 200 NA19007 | [2515685 chr6 | 6 | 168453011 | 168456762 | 3752   | 3   | 0.900691  | 0.082064 | 168452611 | 168453411 | 168456200 | 16845732 |
| 201 NA19007 | [2515685 chr6 | 6 | 169637178 | 169638280 | 1103   | 2   | 0.51462   | 0.096434 | 169636945 | 169637411 | 169638031 | 16963852 |
| 202 NA19007 | [2515685 chr6 | 6 | 170720829 | 170723478 | 2650   | 11  | -0.27425  | 0.048332 | 170720441 | 170721218 | 170723334 | 17072362 |
| 203 NA19007 | [2515685 chr7 | 7 | 113212    | 116416    | 3205   | 14  | -0.532359 | 0.043847 | 113146    | 113279    | 116290    | 116543   |
| 204 NA19007 | [2515685 chr7 | 7 | 1084125   | 1086660   | 2536   | 15  | 0.751791  | 0.039602 | 1083752   | 1084499   | 1085871   | 1087441  |
| 205 NA19007 | [2515685 chr7 | 7 | 3384111   | 3392459   | 8349   | 8   | 0.959668  | 0.057393 | 3383451   | 3384772   | 3390107   | 3395561  |
| 206 NA19007 | [2515685 chr7 | 7 | 12297894  | 12298675  | 782    | 5   | 0.501752  | 0.069045 | 12297829  | 12297960  | 12298540  | 12298811 |
| 207 NA19007 | [2515685 chr7 | 7 | 14024131  | 14025556  | 1426   | 5   | 0.354928  | 0.069572 | 14023511  | 14024751  | 14025262  | 14025851 |
| 208 NA19007 | [2515685 chr7 | 7 | 14893490  | 14895008  | 1519   | 2   | -0.523771 | 0.099629 | 14892978  | 14894003  | 14894576  | 14895441 |
| 209 NA19007 | [2515685 chr7 | 7 | 16886489  | 17216721  | 330233 | 326 | 0.549916  | 0.008279 | 16886185  | 16886794  | 17216160  | 17217281 |
| 210 NA19007 | [2515685 chr7 | 7 | 56652639  | 56671721  | 19083  | 9   | 0.325432  | 0.050473 | 56652228  | 56653051  | 56671191  | 56672251 |
| 211 NA19007 | [2515685 chr7 | 7 | 63995985  | 64009675  | 13691  | 17  | 0.362713  | 0.035808 | 63995676  | 63996294  | 64009043  | 64010301 |
| 212 NA19007 | [2515685 chr7 | 7 | 64438965  | 64455723  | 16759  | 25  | -0.317363 | 0.024731 | 64438949  | 64438982  | 64455526  | 64455921 |
| 213 NA19007 | [2515685 chr7 | 7 | 64540847  | 64556662  | 15816  | 45  | -0.288614 | 0.020438 | 64540466  | 64541228  | 64556244  | 64557081 |
| 214 NA19007 | [2515685 chr7 | 7 | 64565045  | 64581818  | 16774  | 28  | -0.3215   | 0.023491 | 64564855  | 64565236  | 64581802  | 64581831 |
| 215 NA19007 | [2515685 chr7 | 7 | 64691204  | 64725545  | 34342  | 38  | 0.441064  | 0.022791 | 64690582  | 64691826  | 64725209  | 64725881 |
| 216 NA19007 | [2515685 chr7 | 7 | 69866390  | 69869623  | 3234   | 4   | 0.774725  | 0.08163  | 69865412  | 69867368  | 69869269  | 69869971 |
| 217 NA19007 | [2515685 chr7 | 7 | 69869623  | 69871056  | 1434   | 2   | 3.417327  | 0.186172 | 69869269  | 69869978  | 69870420  | 69871691 |
| 218 NA19007 | [2515685 chr7 | 7 | 72012986  | 72014871  | 1886   | 7   | 0.303103  | 0.045976 | 72012906  | 72013067  | 72014598  | 72015141 |
| 219 NA19007 | [2515685 chr7 | 7 | 73698894  | 73700080  | 1187   | 3   | 0.411183  | 0.0819   | 73698686  | 73699103  | 73699523  | 73700631 |
| 220 NA19007 | [2515685 chr7 | 7 | 73823396  | 73824682  | 1287   | 6   | 0.29816   | 0.057198 | 73823316  | 73823477  | 73824463  | 73824901 |
| 221 NA19007 | [2515685 chr7 | 7 | 73965656  | 73966691  | 1036   | 4   | 0.414425  | 0.070631 | 73965279  | 73966033  | 73966513  | 73966871 |
| 222 NA19007 | [2515685 chr7 | 7 | 74096901  | 74098784  | 1884   | 7   | 0.303103  | 0.045976 | 74096630  | 74097173  | 74098704  | 74098861 |
| 223 NA19007 | [2515685 chr7 | 7 | 74510928  | 74512971  | 2044   | 8   | 0.299862  | 0.044149 | 74510847  | 74511009  | 74512891  | 74513051 |
| 224 NA19007 | [2515685 chr7 | 7 | 89455601  | 89456632  | 1032   | 2   | 4.945071  | 0.242815 | 89455373  | 89455830  | 89456225  | 89457031 |
| 225 NA19007 | [2515685 chr7 | 7 | 92971481  | 92976895  | 5415   | 4   | 0.733925  | 0.084396 | 92971060  | 92971903  | 92975569  | 92978221 |
| 226 NA19007 | [2515685 chr7 | 7 | 99513362  | 99516852  | 3491   | 5   | 0.304609  | 0.053389 | 99513133  | 99513592  | 99514500  | 99524431 |
| 227 NA19007 | [2515685 chr7 | 7 | 100269024 | 100278555 | 9532   | 12  | 0.25259   | 0.042454 | 100268656 | 100269393 | 100278317 | 10027879 |
| 228 NA19007 | [2515685 chr7 | 7 | 109034782 | 109046722 | 11941  | 9   | 2.638544  | 0.088999 | 109024063 | 109037134 | 109046491 | 10904695 |
| 229 NA19007 | [2515685 chr7 | 7 | 109776378 | 109782655 | 6278   | 5   | 0.888742  | 0.073992 | 109775821 | 109776936 | 109782301 | 10978301 |
| 230 NA19007 | [2515685 chr7 | 7 | 125639507 | 125644775 | 5269   | 6   | -3.159526 | 0.121758 | 125639054 | 125639961 | 125644046 | 12564550 |
| 231 NA19007 | [2515685 chr7 | 7 | 133243381 | 133245202 | 1822   | 2   | 1.037526  | 0.112106 | 133243008 | 133243755 | 133244207 | 13324619 |

|             |               |   |           |           |         |      |           |          |           |           |           |          |
|-------------|---------------|---|-----------|-----------|---------|------|-----------|----------|-----------|-----------|-----------|----------|
| 232 NA19007 | [2515685 chr7 | 7 | 133245202 | 133257361 | 12160   | 13   | 3.767703  | 0.089939 | 133244207 | 133246197 | 133255009 | 13326093 |
| 233 NA19007 | [2515685 chr7 | 7 | 141962017 | 141983067 | 21051   | 27   | -0.787404 | 0.030998 | 141961693 | 141962342 | 141982817 | 14198331 |
| 234 NA19007 | [2515685 chr7 | 7 | 141986865 | 141993247 | 6383    | 6    | -0.425406 | 0.058721 | 141986289 | 141987442 | 141992651 | 14199384 |
| 235 NA19007 | [2515685 chr7 | 7 | 143257273 | 143259025 | 1753    | 2    | -0.664707 | 0.112687 | 143256987 | 143257560 | 143258671 | 14325938 |
| 236 NA19007 | [2515685 chr7 | 7 | 143346673 | 143348067 | 1395    | 5    | -0.997107 | 0.065454 | 143346643 | 143346704 | 143347806 | 14334832 |
| 237 NA19007 | [2515685 chr7 | 7 | 143472403 | 143473797 | 1395    | 5    | -0.997107 | 0.065454 | 143472142 | 143472664 | 143473766 | 14347382 |
| 238 NA19007 | [2515685 chr7 | 7 | 152288920 | 152291875 | 2956    | 3    | 0.576677  | 0.089736 | 152288338 | 152289503 | 152291299 | 15229245 |
| 239 NA19007 | [2515685 chr7 | 7 | 156939035 | 156942423 | 3389    | 5    | -0.538897 | 0.059308 | 156938932 | 156939138 | 156941474 | 15694337 |
| 240 NA19007 | [2515685 chr7 | 7 | 157023614 | 157027930 | 4317    | 7    | 0.349569  | 0.0557   | 157023242 | 157023987 | 157027451 | 15702840 |
| 241 NA19007 | [2515685 chr7 | 7 | 158617060 | 158624380 | 7321    | 6    | 0.928886  | 0.066965 | 158616763 | 158617357 | 158622028 | 15862673 |
| 242 NA19007 | [2515685 chr8 | 8 | 1328256   | 1343509   | 15254   | 45   | -1.23136  | 0.022008 | 1327688   | 1328824   | 1342795   | 1344224  |
| 243 NA19007 | [2515685 chr8 | 8 | 2238733   | 2253794   | 15062   | 10   | 0.828986  | 0.052029 | 2233839   | 2241488   | 2251039   | 2257524  |
| 244 NA19007 | [2515685 chr8 | 8 | 3673707   | 5933395   | 2259689 | 2216 | 0.481398  | 0.003133 | 3673110   | 3674304   | 5930640   | 5938874  |
| 245 NA19007 | [2515685 chr8 | 8 | 7176337   | 7187950   | 11614   | 33   | 0.718471  | 0.026423 | 7176045   | 7176630   | 7187698   | 7188202  |
| 246 NA19007 | [2515685 chr8 | 8 | 7862281   | 7873897   | 11617   | 34   | 0.725149  | 0.02529  | 7862030   | 7862533   | 7873605   | 7874190  |
| 247 NA19007 | [2515685 chr8 | 8 | 12023134  | 12034819  | 11686   | 32   | 0.757563  | 0.02719  | 12022997  | 12023272  | 12034665  | 12034972 |
| 248 NA19007 | [2515685 chr8 | 8 | 12276602  | 12284041  | 7440    | 13   | 0.60316   | 0.03779  | 12276206  | 12276998  | 12283622  | 12284462 |
| 249 NA19007 | [2515685 chr8 | 8 | 12599305  | 12604431  | 5127    | 6    | -0.46979  | 0.064904 | 12599098  | 12599513  | 12604146  | 12604711 |
| 250 NA19007 | [2515685 chr8 | 8 | 13604368  | 13607211  | 2844    | 4    | -0.396036 | 0.075567 | 13604028  | 13604708  | 13606774  | 13607644 |
| 251 NA19007 | [2515685 chr8 | 8 | 18900549  | 18901909  | 1361    | 2    | -0.797714 | 0.100141 | 18900138  | 18900960  | 18901577  | 18902242 |
| 252 NA19007 | [2515685 chr8 | 8 | 20022286  | 20024771  | 2486    | 2    | -0.740156 | 0.12009  | 20021082  | 20023491  | 20024338  | 20025202 |
| 253 NA19007 | [2515685 chr8 | 8 | 25466015  | 25471689  | 5675    | 4    | -0.817773 | 0.07748  | 25464392  | 25467638  | 25470702  | 25472671 |
| 254 NA19007 | [2515685 chr8 | 8 | 39351178  | 39506673  | 155496  | 163  | 0.829643  | 0.012417 | 39350826  | 39351530  | 39505284  | 39508062 |
| 255 NA19007 | [2515685 chr8 | 8 | 58280040  | 58287850  | 7811    | 7    | 0.346834  | 0.044183 | 58279595  | 58280486  | 58287616  | 58288808 |
| 256 NA19007 | [2515685 chr8 | 8 | 85423649  | 85431920  | 8272    | 7    | 0.925351  | 0.056228 | 85423043  | 85424256  | 85431347  | 85432549 |
| 257 NA19007 | [2515685 chr8 | 8 | 86742169  | 86910255  | 168087  | 105  | 0.457692  | 0.01068  | 86741757  | 86742581  | 86910002  | 86910504 |
| 258 NA19007 | [2515685 chr8 | 8 | 100705853 | 100708215 | 2363    | 2    | -1.042884 | 0.12295  | 100705541 | 100706165 | 100706775 | 10070965 |
| 259 NA19007 | [2515685 chr8 | 8 | 115702151 | 115715318 | 13168   | 12   | -0.859557 | 0.046532 | 115701237 | 115703065 | 115712563 | 11571874 |
| 260 NA19007 | [2515685 chr8 | 8 | 120222659 | 120229952 | 7294    | 6    | 0.854441  | 0.062799 | 120218251 | 120225414 | 120229434 | 12023047 |
| 261 NA19007 | [2515685 chr8 | 8 | 135129387 | 135137626 | 8240    | 12   | -3.889097 | 0.090018 | 135129076 | 135129698 | 135137252 | 13513800 |
| 262 NA19007 | [2515685 chr9 | 9 | 196994    | 198604    | 1611    | 2    | -0.498517 | 0.097989 | 196524    | 197465    | 198215    | 198994   |
| 263 NA19007 | [2515685 chr9 | 9 | 16892231  | 16894575  | 2345    | 3    | -0.661884 | 0.087385 | 16891921  | 16892542  | 16894273  | 16894871 |
| 264 NA19007 | [2515685 chr9 | 9 | 33789424  | 33793351  | 3928    | 6    | -0.460381 | 0.06168  | 33789218  | 33789631  | 33793129  | 33793572 |
| 265 NA19007 | [2515685 chr9 | 9 | 38899810  | 38900502  | 693     | 2    | 0.550375  | 0.094358 | 38899653  | 38899968  | 38900981  | 38901022 |
| 266 NA19007 | [2515685 chr9 | 9 | 39433591  | 39435379  | 1789    | 7    | 0.344169  | 0.044656 | 39433497  | 39433686  | 39435082  | 39435671 |
| 267 NA19007 | [2515685 chr9 | 9 | 39643414  | 39655758  | 12345   | 4    | 0.343347  | 0.052262 | 39643207  | 39643621  | 39655071  | 39656441 |
| 268 NA19007 | [2515685 chr9 | 9 | 39744869  | 39748723  | 3855    | 7    | 0.344169  | 0.044656 | 39744775  | 39744964  | 39746360  | 39797031 |
| 269 NA19007 | [2515685 chr9 | 9 | 39897383  | 40011174  | 113792  | 123  | 0.303656  | 0.011159 | 39897294  | 39897473  | 40011032  | 40011311 |
| 270 NA19007 | [2515685 chr9 | 9 | 40491521  | 40562265  | 70745   | 144  | 0.312321  | 0.010374 | 40491324  | 40491719  | 40562176  | 40562351 |
| 271 NA19007 | [2515685 chr9 | 9 | 40730670  | 40736193  | 5524    | 8    | 0.335966  | 0.045848 | 40730592  | 40730749  | 40735341  | 40737041 |
| 272 NA19007 | [2515685 chr9 | 9 | 41198940  | 41199633  | 694     | 2    | 0.550377  | 0.094358 | 41198419  | 41199462  | 41199476  | 41199791 |
| 273 NA19007 | [2515685 chr9 | 9 | 41505659  | 41567517  | 61859   | 123  | 0.294167  | 0.010991 | 41505565  | 41505754  | 41567428  | 41567602 |
| 274 NA19007 | [2515685 chr9 | 9 | 42024122  | 42029645  | 5524    | 8    | 0.335966  | 0.045848 | 42023271  | 42024974  | 42029567  | 42029722 |
| 275 NA19007 | [2515685 chr9 | 9 | 42074739  | 42078332  | 3594    | 7    | 0.370542  | 0.042422 | 42074446  | 42075033  | 42078087  | 42078571 |
| 276 NA19007 | [2515685 chr9 | 9 | 42154189  | 42216052  | 61864   | 127  | 0.295876  | 0.010787 | 42154100  | 42154279  | 42215957  | 42216142 |
| 277 NA19007 | [2515685 chr9 | 9 | 42705275  | 42711714  | 6440    | 11   | 0.294266  | 0.036422 | 42705209  | 42705342  | 42711636  | 42711792 |
| 278 NA19007 | [2515685 chr9 | 9 | 42759333  | 42762940  | 3608    | 7    | 0.312882  | 0.039862 | 42759037  | 42759629  | 42762696  | 42763181 |
| 279 NA19007 | [2515685 chr9 | 9 | 42825951  | 42832390  | 6440    | 11   | 0.294266  | 0.036422 | 42825885  | 42826018  | 42832312  | 42832461 |
| 280 NA19007 | [2515685 chr9 | 9 | 42880009  | 42883616  | 3608    | 7    | 0.312882  | 0.039862 | 42879713  | 42880305  | 42883372  | 42883862 |
| 281 NA19007 | [2515685 chr9 | 9 | 43807800  | 43822779  | 14980   | 25   | 0.300805  | 0.027807 | 43807212  | 43808388  | 43822645  | 43822912 |
| 282 NA19007 | [2515685 chr9 | 9 | 66011368  | 66012061  | 694     | 2    | 0.550377  | 0.094358 | 66010847  | 66011890  | 66011904  | 66012212 |
| 283 NA19007 | [2515685 chr9 | 9 | 68200977  | 68201915  | 939     | 2    | 0.651472  | 0.093419 | 68200578  | 68201376  | 68201730  | 68202102 |
| 284 NA19007 | [2515685 chr9 | 9 | 81553104  | 81555243  | 2140    | 2    | 1.075201  | 0.111035 | 81552817  | 81553392  | 81553888  | 81556591 |
| 285 NA19007 | [2515685 chr9 | 9 | 84052814  | 84144720  | 91907   | 2    | -0.705507 | 0.103204 | 83978854  | 84055177  | 84142357  | 84248692 |
| 286 NA19007 | [2515685 chr9 | 9 | 87615991  | 87618356  | 2366    | 3    | 0.468187  | 0.085551 | 87615588  | 87616394  | 87617958  | 87618752 |

|             |                |    |           |           |        |     |           |          |           |           |           |           |
|-------------|----------------|----|-----------|-----------|--------|-----|-----------|----------|-----------|-----------|-----------|-----------|
| 287 NA19007 | [2515685 chr9  | 9  | 112898696 | 112932269 | 33574  | 46  | 0.295172  | 0.015841 | 112898222 | 112899170 | 112931621 | 112932917 |
| 288 NA19007 | [2515685 chr9  | 9  | 135438418 | 135444067 | 5650   | 2   | 4.459175  | 0.20025  | 135383632 | 135440781 | 135443016 | 135445111 |
| 289 NA19007 | [2515685 chr9  | 9  | 138397327 | 138399638 | 2312   | 12  | -0.500298 | 0.04707  | 138397201 | 138397454 | 138399572 | 13839970  |
| 290 NA19007 | [2515685 chr10 | 10 | 3153885   | 3156214   | 2330   | 3   | -0.552678 | 0.074769 | 3153427   | 3154343   | 3155871   | 3156558   |
| 291 NA19007 | [2515685 chr10 | 10 | 6693908   | 6705054   | 11147  | 10  | 0.792464  | 0.048717 | 6692231   | 6695585   | 6704634   | 6705474   |
| 292 NA19007 | [2515685 chr10 | 10 | 19788068  | 19790461  | 2394   | 3   | -0.413803 | 0.076878 | 19787726  | 19788411  | 19789952  | 19790971  |
| 293 NA19007 | [2515685 chr10 | 10 | 20036833  | 20038315  | 1483   | 2   | -2.904464 | 0.177406 | 20036464  | 20037202  | 20038007  | 2003862   |
| 294 NA19007 | [2515685 chr10 | 10 | 37487278  | 37527970  | 40693  | 62  | -0.266792 | 0.014586 | 37486985  | 37487572  | 37527566  | 3752837   |
| 295 NA19007 | [2515685 chr10 | 10 | 45507742  | 45517699  | 9958   | 23  | -0.299161 | 0.02537  | 45507577  | 45507908  | 45517390  | 4551800   |
| 296 NA19007 | [2515685 chr10 | 10 | 45625268  | 45627174  | 1907   | 2   | -1.045299 | 0.08956  | 45625050  | 45625486  | 45626243  | 4562810   |
| 297 NA19007 | [2515685 chr10 | 10 | 45628873  | 45649494  | 20622  | 37  | -0.278263 | 0.019884 | 45628687  | 45629059  | 45649171  | 45649817  |
| 298 NA19007 | [2515685 chr10 | 10 | 45688832  | 45730379  | 41548  | 116 | -0.278819 | 0.011308 | 45688698  | 45688966  | 45729628  | 4573113   |
| 299 NA19007 | [2515685 chr10 | 10 | 45744145  | 45744762  | 618    | 2   | -0.530476 | 0.094451 | 45743850  | 45744441  | 45744478  | 45745047  |
| 300 NA19007 | [2515685 chr10 | 10 | 46110964  | 46132961  | 21998  | 40  | -0.385445 | 0.018236 | 46110327  | 46111602  | 46132792  | 4613313   |
| 301 NA19007 | [2515685 chr10 | 10 | 46185144  | 46600786  | 415643 | 657 | -0.322352 | 0.003282 | 46184361  | 46185928  | 46600776  | 4660079   |
| 302 NA19007 | [2515685 chr10 | 10 | 46606129  | 46675076  | 68948  | 217 | -0.322352 | 0.003282 | 46606047  | 46606211  | 46675054  | 4667509   |
| 303 NA19007 | [2515685 chr10 | 10 | 46677788  | 47173707  | 495920 | 548 | -0.322352 | 0.003282 | 46677220  | 46678357  | 47173507  | 47173907  |
| 304 NA19007 | [2515685 chr10 | 10 | 47191614  | 47200896  | 9283   | 24  | -0.299525 | 0.02329  | 47191502  | 47191726  | 47200104  | 4720168   |
| 305 NA19007 | [2515685 chr10 | 10 | 47219668  | 47221310  | 1643   | 9   | -0.465374 | 0.045876 | 47219445  | 47219892  | 47221226  | 4722139   |
| 306 NA19007 | [2515685 chr10 | 10 | 47227413  | 47231502  | 4090   | 15  | -0.438559 | 0.030648 | 47227267  | 47227560  | 47231201  | 4723180   |
| 307 NA19007 | [2515685 chr10 | 10 | 47482859  | 47490584  | 7726   | 11  | 0.327038  | 0.044052 | 47482183  | 47483536  | 47488691  | 4749247   |
| 308 NA19007 | [2515685 chr10 | 10 | 47723236  | 47791242  | 68007  | 181 | -0.317757 | 0.008225 | 47575187  | 47725982  | 47791005  | 4779148   |
| 309 NA19007 | [2515685 chr10 | 10 | 47794286  | 47803532  | 9247   | 31  | -0.317757 | 0.008225 | 47794264  | 47794309  | 47802824  | 4780424   |
| 310 NA19007 | [2515685 chr10 | 10 | 47848959  | 47858250  | 9292   | 26  | -0.303107 | 0.023623 | 47848847  | 47849071  | 47857458  | 4785904   |
| 311 NA19007 | [2515685 chr10 | 10 | 47877984  | 47879639  | 1656   | 7   | -0.442432 | 0.051174 | 47877760  | 47878209  | 47879555  | 4787972   |
| 312 NA19007 | [2515685 chr10 | 10 | 47885738  | 47889830  | 4093   | 16  | -0.447308 | 0.029707 | 47885592  | 47885885  | 47889529  | 4789013   |
| 313 NA19007 | [2515685 chr10 | 10 | 48499011  | 48529999  | 30989  | 58  | -0.342438 | 0.015328 | 48498672  | 48499351  | 48529215  | 4853078   |
| 314 NA19007 | [2515685 chr10 | 10 | 48574881  | 48865591  | 290711 | 278 | -0.330438 | 0.006772 | 48574098  | 48575665  | 48865564  | 4886561   |
| 315 NA19007 | [2515685 chr10 | 10 | 48887243  | 48896586  | 9344   | 27  | -0.300172 | 0.022917 | 48886453  | 48888033  | 48896535  | 4889663   |
| 316 NA19007 | [2515685 chr10 | 10 | 50724176  | 50762101  | 37926  | 109 | -0.287937 | 0.01211  | 50721723  | 50726630  | 50761350  | 5076285   |
| 317 NA19007 | [2515685 chr10 | 10 | 50766375  | 50767956  | 1582   | 2   | 0.439034  | 0.07503  | 50765016  | 50767734  | 50767777  | 5076813   |
| 318 NA19007 | [2515685 chr10 | 10 | 50878899  | 50880805  | 1907   | 2   | -0.736407 | 0.086517 | 50878681  | 50879118  | 50879874  | 5088173   |
| 319 NA19007 | [2515685 chr10 | 10 | 50882504  | 50903111  | 20608  | 37  | -0.282378 | 0.01992  | 50882318  | 50882690  | 50902788  | 5090343   |
| 320 NA19007 | [2515685 chr10 | 10 | 50942299  | 50983832  | 41534  | 121 | -0.279545 | 0.011164 | 50942165  | 50942433  | 50983081  | 5098458   |
| 321 NA19007 | [2515685 chr10 | 10 | 51020093  | 51020588  | 496    | 2   | -0.526947 | 0.105218 | 51019815  | 51020371  | 51020414  | 5102076   |
| 322 NA19007 | [2515685 chr10 | 10 | 51119630  | 51142582  | 22953  | 43  | -0.342583 | 0.017984 | 51119365  | 51119895  | 51142260  | 5114290   |
| 323 NA19007 | [2515685 chr10 | 10 | 51336521  | 51337138  | 618    | 2   | -0.530475 | 0.094451 | 51336237  | 51336806  | 51336843  | 5133743   |
| 324 NA19007 | [2515685 chr10 | 10 | 51350904  | 51392451  | 41548  | 116 | -0.278354 | 0.011306 | 51350153  | 51351656  | 51392317  | 5139258   |
| 325 NA19007 | [2515685 chr10 | 10 | 51431625  | 51441846  | 10222  | 25  | -0.329131 | 0.025272 | 51431512  | 51431739  | 51441420  | 5144227   |
| 326 NA19007 | [2515685 chr10 | 10 | 51576702  | 51585884  | 9183   | 12  | 0.331819  | 0.042477 | 51576024  | 51577380  | 51583991  | 5158777   |
| 327 NA19007 | [2515685 chr10 | 10 | 56117212  | 56139275  | 22064  | 20  | -0.968625 | 0.034602 | 56115764  | 56118661  | 56138931  | 5613961   |
| 328 NA19007 | [2515685 chr10 | 10 | 56528307  | 56531662  | 3356   | 4   | -0.412408 | 0.072671 | 56527343  | 56529271  | 56531349  | 5653197   |
| 329 NA19007 | [2515685 chr10 | 10 | 66977355  | 66985193  | 7839   | 8   | -4.270921 | 0.123856 | 66976803  | 66977908  | 66984894  | 6698549   |
| 330 NA19007 | [2515685 chr10 | 10 | 88861693  | 88966295  | 104603 | 113 | -0.325642 | 0.012173 | 88859433  | 88863954  | 88965910  | 8896668   |
| 331 NA19007 | [2515685 chr10 | 10 | 90930310  | 90936395  | 6086   | 8   | -0.926973 | 0.05752  | 90929856  | 90930765  | 90936050  | 9093674   |
| 332 NA19007 | [2515685 chr10 | 10 | 124341749 | 124344052 | 2304   | 2   | -0.508614 | 0.079145 | 124341238 | 124342261 | 124342951 | 12434515  |
| 333 NA19007 | [2515685 chr10 | 10 | 124350353 | 124366738 | 16386  | 21  | -0.556636 | 0.022478 | 124350031 | 124350675 | 124366300 | 12436717  |
| 334 NA19007 | [2515685 chr10 | 10 | 133579899 | 133584218 | 4320   | 12  | -0.544957 | 0.041497 | 133579611 | 133580188 | 133583877 | 13358456  |
| 335 NA19007 | [2515685 chr10 | 10 | 134933493 | 134935385 | 1893   | 2   | 0.584431  | 0.095076 | 134933044 | 134933943 | 134934910 | 13493586  |
| 336 NA19007 | [2515685 chr10 | 10 | 135359469 | 135362077 | 2609   | 4   | -0.50958  | 0.079907 | 135358927 | 135360012 | 135361749 | 13536240  |
| 337 NA19007 | [2515685 chr11 | 11 | 3628748   | 3632795   | 4048   | 6   | -0.590858 | 0.063387 | 3625722   | 3631775   | 3632594   | 363299    |
| 338 NA19007 | [2515685 chr11 | 11 | 4268999   | 4269819   | 821    | 2   | 0.723145  | 0.102183 | 4268986   | 4269013   | 4269813   | 426982    |
| 339 NA19007 | [2515685 chr11 | 11 | 4320159   | 4320979   | 821    | 2   | 0.723145  | 0.102183 | 4320146   | 4320173   | 4320973   | 432098    |
| 340 NA19007 | [2515685 chr11 | 11 | 4924831   | 4932599   | 7769   | 8   | -0.872741 | 0.053337 | 4924403   | 4925260   | 4931948   | 4933257   |
| 341 NA19007 | [2515685 chr11 | 11 | 5717038   | 5722030   | 4993   | 3   | 2.975321  | 0.149877 | 5716660   | 5717416   | 5718945   | 5725487   |

|             |                |    |           |           |        |     |           |          |           |           |           |          |
|-------------|----------------|----|-----------|-----------|--------|-----|-----------|----------|-----------|-----------|-----------|----------|
| 342 NA19007 | [2515685 chr11 | 11 | 5741269   | 5765993   | 24725  | 33  | 3.381813  | 0.050015 | 5741059   | 5741480   | 5765632   | 5766354  |
| 343 NA19007 | [2515685 chr11 | 11 | 11831868  | 11833089  | 1222   | 2   | -4.007702 | 0.244767 | 11831412  | 11832324  | 11832853  | 11833321 |
| 344 NA19007 | [2515685 chr11 | 11 | 18903448  | 18923024  | 19577  | 30  | 0.497995  | 0.026518 | 18897800  | 18906533  | 18919939  | 18928457 |
| 345 NA19007 | [2515685 chr11 | 11 | 28965605  | 28969186  | 3582   | 5   | 4.523042  | 0.153732 | 28965284  | 28965927  | 28968702  | 28969671 |
| 346 NA19007 | [2515685 chr11 | 11 | 48284073  | 48284771  | 699    | 2   | 0.91462   | 0.105733 | 48283862  | 48284285  | 48284572  | 48284971 |
| 347 NA19007 | [2515685 chr11 | 11 | 49072856  | 49075952  | 3097   | 6   | 0.443667  | 0.060596 | 49072572  | 49073140  | 49075650  | 49076254 |
| 348 NA19007 | [2515685 chr11 | 11 | 49665830  | 49715833  | 50004  | 36  | 0.529004  | 0.024556 | 49665251  | 49666410  | 49712748  | 49721981 |
| 349 NA19007 | [2515685 chr11 | 11 | 55124643  | 55212653  | 88011  | 98  | -0.875329 | 0.016072 | 55124460  | 55124827  | 55209568  | 55215751 |
| 350 NA19007 | [2515685 chr11 | 11 | 56381856  | 56383662  | 1807   | 2   | 0.525643  | 0.090302 | 56381278  | 56382434  | 56382844  | 56384448 |
| 351 NA19007 | [2515685 chr11 | 11 | 60721034  | 60777477  | 56444  | 73  | 0.810766  | 0.014205 | 60720112  | 60721956  | 60776810  | 60778141 |
| 352 NA19007 | [2515685 chr11 | 11 | 73812690  | 73818580  | 5891   | 4   | -0.459188 | 0.076717 | 73812400  | 73812981  | 73818213  | 73818947 |
| 353 NA19007 | [2515685 chr11 | 11 | 77329004  | 77348594  | 19591  | 3   | -0.335749 | 0.060514 | 77328780  | 77329229  | 77345509  | 77370221 |
| 354 NA19007 | [2515685 chr11 | 11 | 85981700  | 85984113  | 2414   | 3   | -3.747279 | 0.17769  | 85981147  | 85982254  | 85983791  | 85984431 |
| 355 NA19007 | [2515685 chr11 | 11 | 88266938  | 88303948  | 37011  | 40  | 0.28184   | 0.023227 | 88266424  | 88267453  | 88303762  | 88304131 |
| 356 NA19007 | [2515685 chr11 | 11 | 113977904 | 114010847 | 32944  | 47  | 0.326005  | 0.02107  | 113976911 | 113978897 | 114007762 | 11401698 |
| 357 NA19007 | [2515685 chr11 | 11 | 134107699 | 134112290 | 4592   | 5   | 0.996288  | 0.069985 | 134106591 | 134108808 | 134111845 | 13411273 |
| 358 NA19007 | [2515685 chr12 | 12 | 300666    | 302505    | 1840   | 2   | 0.569368  | 0.097469 | 300400    | 300933    | 301926    | 303084   |
| 359 NA19007 | [2515685 chr12 | 12 | 736840    | 744802    | 7963   | 9   | 0.95168   | 0.050673 | 736616    | 737064    | 744211    | 745394   |
| 360 NA19007 | [2515685 chr12 | 12 | 2112534   | 2127840   | 15307  | 16  | 0.743771  | 0.037625 | 2109107   | 2115961   | 2127279   | 2128402  |
| 361 NA19007 | [2515685 chr12 | 12 | 6113530   | 6118188   | 4659   | 4   | 0.640488  | 0.082043 | 6111640   | 6115421   | 6117816   | 6118567  |
| 362 NA19007 | [2515685 chr12 | 12 | 9439936   | 9445623   | 5688   | 9   | 0.327618  | 0.044396 | 9439574   | 9440298   | 9445247   | 9446000  |
| 363 NA19007 | [2515685 chr12 | 12 | 9527659   | 9624971   | 97313  | 104 | 0.736751  | 0.01573  | 9526872   | 9528447   | 9623223   | 9626720  |
| 364 NA19007 | [2515685 chr12 | 12 | 9646904   | 9649697   | 2794   | 3   | 0.450056  | 0.079976 | 9646692   | 9647116   | 9649433   | 9649967  |
| 365 NA19007 | [2515685 chr12 | 12 | 10472497  | 10491895  | 19399  | 14  | -0.467326 | 0.040961 | 10472016  | 10472979  | 10488400  | 10553941 |
| 366 NA19007 | [2515685 chr12 | 12 | 11396413  | 11442861  | 46449  | 46  | -0.313238 | 0.02083  | 11395931  | 11396895  | 11442625  | 11443097 |
| 367 NA19007 | [2515685 chr12 | 12 | 20921232  | 20922047  | 816    | 2   | 0.486721  | 0.093332 | 20920993  | 20921472  | 20921878  | 20922211 |
| 368 NA19007 | [2515685 chr12 | 12 | 31157023  | 31244780  | 87758  | 82  | 0.454715  | 0.016249 | 31156773  | 31157274  | 31244217  | 31245341 |
| 369 NA19007 | [2515685 chr12 | 12 | 57004588  | 57020201  | 15614  | 8   | 0.36664   | 0.053493 | 57004218  | 57004958  | 57019624  | 57020771 |
| 370 NA19007 | [2515685 chr12 | 12 | 70475445  | 70476812  | 1368   | 2   | -3.839863 | 0.227368 | 70475180  | 70475711  | 70476524  | 70477101 |
| 371 NA19007 | [2515685 chr12 | 12 | 78656134  | 78665261  | 9128   | 9   | -0.639387 | 0.051389 | 78654687  | 78657582  | 78664736  | 78665781 |
| 372 NA19007 | [2515685 chr12 | 12 | 87338118  | 87347005  | 8888   | 4   | -0.477171 | 0.080666 | 87329173  | 87341613  | 87346311  | 87347701 |
| 373 NA19007 | [2515685 chr12 | 12 | 126009950 | 126112215 | 102266 | 3   | -0.738868 | 0.079958 | 125852405 | 126013445 | 126110107 | 12611432 |
| 374 NA19007 | [2515685 chr12 | 12 | 128601598 | 128602937 | 1340   | 2   | -1.005583 | 0.101768 | 128601341 | 128601856 | 128602454 | 12860342 |
| 375 NA19007 | [2515685 chr12 | 12 | 128945204 | 128946959 | 1756   | 2   | -0.454421 | 0.08807  | 128944824 | 128945584 | 128946612 | 12894730 |
| 376 NA19007 | [2515685 chr12 | 12 | 130257877 | 130259876 | 2000   | 3   | -0.44694  | 0.073675 | 130257493 | 130258262 | 130259649 | 13026010 |
| 377 NA19007 | [2515685 chr12 | 12 | 130777013 | 130778340 | 1328   | 2   | -0.571102 | 0.098722 | 130776667 | 130777359 | 130778020 | 13077866 |
| 378 NA19007 | [2515685 chr12 | 12 | 130798727 | 130801060 | 2334   | 4   | -0.959185 | 0.075381 | 130798268 | 130799187 | 130800776 | 13080134 |
| 379 NA19007 | [2515685 chr13 | 13 | 25947233  | 25950398  | 3166   | 3   | 4.247756  | 0.186526 | 25946194  | 25948272  | 25949415  | 2595138  |
| 380 NA19007 | [2515685 chr13 | 13 | 69633905  | 69673289  | 39385  | 42  | 0.795277  | 0.023872 | 69633412  | 69634399  | 69672985  | 69673591 |
| 381 NA19007 | [2515685 chr13 | 13 | 104532645 | 104542955 | 10311  | 10  | -0.283204 | 0.047441 | 104532375 | 104532915 | 104540581 | 10454532 |
| 382 NA19007 | [2515685 chr13 | 13 | 109215660 | 109217089 | 1430   | 5   | 0.372416  | 0.060766 | 109215230 | 109216090 | 109216885 | 10921729 |
| 383 NA19007 | [2515685 chr13 | 13 | 110502383 | 110503129 | 747    | 3   | -1.273684 | 0.105197 | 110502225 | 110502541 | 110502890 | 11050336 |
| 384 NA19007 | [2515685 chr13 | 13 | 113079647 | 113086824 | 7178   | 3   | 0.799629  | 0.082919 | 113078890 | 113080404 | 113082138 | 11309434 |
| 385 NA19007 | [2515685 chr14 | 14 | 18439491  | 18811577  | 372087 | 596 | -0.307862 | 0.003579 | 18437497  | 18441485  | 18811367  | 18811781 |
| 386 NA19007 | [2515685 chr14 | 14 | 18899439  | 19265232  | 365794 | 644 | -0.307862 | 0.003579 | 18897773  | 18901105  | 19261661  | 19268801 |
| 387 NA19007 | [2515685 chr14 | 14 | 19265232  | 19494842  | 229611 | 212 | 0.352924  | 0.009897 | 19261661  | 19268804  | 19494444  | 19495247 |
| 388 NA19007 | [2515685 chr14 | 14 | 19619354  | 19625484  | 6131   | 3   | 3.729369  | 0.203902 | 19612261  | 19624114  | 19625018  | 19625951 |
| 389 NA19007 | [2515685 chr14 | 14 | 23494951  | 23544356  | 49406  | 69  | -0.259146 | 0.016755 | 23494551  | 23495351  | 23544096  | 23544611 |
| 390 NA19007 | [2515685 chr14 | 14 | 40679041  | 40739449  | 60409  | 57  | -0.901691 | 0.021238 | 40678078  | 40680005  | 40739212  | 40739681 |
| 391 NA19007 | [2515685 chr14 | 14 | 40893293  | 40896720  | 3428   | 3   | -0.518678 | 0.081662 | 40892979  | 40893608  | 40896289  | 40897157 |
| 392 NA19007 | [2515685 chr14 | 14 | 42059344  | 42062997  | 3654   | 2   | 0.6752    | 0.114439 | 42056485  | 42062203  | 42062601  | 42063391 |
| 393 NA19007 | [2515685 chr14 | 14 | 73052083  | 73053781  | 1699   | 2   | -0.575211 | 0.083707 | 73051714  | 73052452  | 73052927  | 73054631 |
| 394 NA19007 | [2515685 chr14 | 14 | 73063171  | 73122855  | 59685  | 54  | 0.475854  | 0.019375 | 73061866  | 73064476  | 73122227  | 73123481 |
| 395 NA19007 | [2515685 chr14 | 14 | 103318735 | 103321606 | 2872   | 4   | 0.396091  | 0.070373 | 103318164 | 103319306 | 103321274 | 10332193 |
| 396 NA19007 | [2515685 chr14 | 14 | 103404274 | 103405873 | 1600   | 2   | 0.606299  | 0.100209 | 103404003 | 103404545 | 103405508 | 10340623 |

|             |                |    |           |           |        |     |           |          |           |           |           |           |
|-------------|----------------|----|-----------|-----------|--------|-----|-----------|----------|-----------|-----------|-----------|-----------|
| 397 NA19007 | [2515685 chr15 | 15 | 18810351  | 18894799  | 84449  | 91  | 0.318987  | 0.015557 | 18810026  | 18810676  | 18894022  | 18895577  |
| 398 NA19007 | [2515685 chr15 | 15 | 19091697  | 19216291  | 124595 | 158 | 0.343118  | 0.011294 | 19091528  | 19091867  | 19215900  | 19216687  |
| 399 NA19007 | [2515685 chr15 | 15 | 19344811  | 19466745  | 121935 | 136 | 0.347922  | 0.012071 | 19344413  | 19345210  | 19466696  | 19466797  |
| 400 NA19007 | [2515685 chr15 | 15 | 19761204  | 19795268  | 34065  | 37  | 0.390667  | 0.021155 | 19663241  | 19763507  | 19795095  | 19795444  |
| 401 NA19007 | [2515685 chr15 | 15 | 19809806  | 19838440  | 28635  | 26  | 0.309602  | 0.028788 | 19807597  | 19812016  | 19836986  | 19839897  |
| 402 NA19007 | [2515685 chr15 | 15 | 19838440  | 19845597  | 7158   | 12  | 0.687056  | 0.041641 | 19836986  | 19839894  | 19845254  | 19845947  |
| 403 NA19007 | [2515685 chr15 | 15 | 19845597  | 19874194  | 28598  | 27  | 0.337122  | 0.028891 | 19845254  | 19845941  | 19873671  | 19874711  |
| 404 NA19007 | [2515685 chr15 | 15 | 19976034  | 20094951  | 118918 | 123 | 0.265663  | 0.01297  | 19975765  | 19976303  | 20092648  | 20197778  |
| 405 NA19007 | [2515685 chr15 | 15 | 20952615  | 20953220  | 606    | 4   | 0.335272  | 0.054255 | 20952542  | 20952688  | 20953050  | 20953391  |
| 406 NA19007 | [2515685 chr15 | 15 | 21050351  | 21119003  | 68653  | 26  | 0.286756  | 0.023204 | 21050342  | 21050361  | 21118833  | 21119177  |
| 407 NA19007 | [2515685 chr15 | 15 | 21605983  | 21614601  | 8619   | 8   | 0.771466  | 0.058788 | 21605507  | 21606459  | 21612298  | 21636691  |
| 408 NA19007 | [2515685 chr15 | 15 | 21889342  | 21928308  | 38967  | 49  | -0.363851 | 0.020455 | 21886159  | 21891645  | 21927233  | 21929387  |
| 409 NA19007 | [2515685 chr15 | 15 | 22057253  | 22087673  | 30421  | 33  | -0.331418 | 0.024201 | 22057103  | 22057403  | 22086872  | 22088471  |
| 410 NA19007 | [2515685 chr15 | 15 | 22162649  | 22169427  | 6779   | 8   | -0.458922 | 0.048967 | 22162507  | 22162792  | 22168158  | 22170697  |
| 411 NA19007 | [2515685 chr15 | 15 | 22203281  | 22204201  | 921    | 2   | -0.561766 | 0.09139  | 22202730  | 22203833  | 22204093  | 22204311  |
| 412 NA19007 | [2515685 chr15 | 15 | 22217690  | 22273856  | 56167  | 77  | -0.649398 | 0.017274 | 22217361  | 22218020  | 22273719  | 22273997  |
| 413 NA19007 | [2515685 chr15 | 15 | 22276370  | 22288771  | 12402  | 10  | -0.381527 | 0.041451 | 22274561  | 22278179  | 22288675  | 22288867  |
| 414 NA19007 | [2515685 chr15 | 15 | 24986053  | 24992250  | 6198   | 7   | 0.822943  | 0.061774 | 24985426  | 24986680  | 24991680  | 24992821  |
| 415 NA19007 | [2515685 chr15 | 15 | 26263874  | 26264479  | 606    | 4   | 0.335272  | 0.054255 | 26263801  | 26263947  | 26264309  | 26264647  |
| 416 NA19007 | [2515685 chr15 | 15 | 26538169  | 26542764  | 4596   | 11  | -0.25812  | 0.037529 | 26538129  | 26538209  | 26542214  | 26543317  |
| 417 NA19007 | [2515685 chr15 | 15 | 26610077  | 26610682  | 606    | 4   | 0.335272  | 0.054255 | 26609907  | 26610247  | 26610609  | 26610751  |
| 418 NA19007 | [2515685 chr15 | 15 | 27133610  | 27134889  | 1280   | 4   | 0.53611   | 0.076559 | 27133306  | 27133914  | 27134660  | 27135111  |
| 419 NA19007 | [2515685 chr15 | 15 | 27237917  | 27240705  | 2789   | 2   | 0.5577    | 0.107058 | 27237584  | 27238251  | 27240292  | 27241111  |
| 420 NA19007 | [2515685 chr15 | 15 | 27688132  | 27690372  | 2241   | 3   | -0.405579 | 0.190638 | 27687785  | 27688480  | 27690197  | 27690547  |
| 421 NA19007 | [2515685 chr15 | 15 | 28182485  | 28199649  | 17165  | 37  | -0.367631 | 0.020627 | 28182045  | 28182925  | 28198888  | 28200411  |
| 422 NA19007 | [2515685 chr15 | 15 | 28275025  | 28473072  | 198048 | 279 | -0.303489 | 0.008849 | 28274533  | 28275518  | 28472833  | 28473317  |
| 423 NA19007 | [2515685 chr15 | 15 | 28503854  | 28592436  | 88583  | 149 | -0.250374 | 0.011499 | 28503561  | 28504148  | 28592101  | 28592777  |
| 424 NA19007 | [2515685 chr15 | 15 | 28608137  | 28621359  | 13223  | 24  | -0.254454 | 0.02581  | 28607842  | 28608433  | 28621054  | 28621667  |
| 425 NA19007 | [2515685 chr15 | 15 | 28652184  | 28668634  | 16451  | 32  | -0.346453 | 0.021645 | 28651945  | 28652423  | 28667873  | 28669391  |
| 426 NA19007 | [2515685 chr15 | 15 | 30233942  | 30422660  | 188719 | 263 | -0.2858   | 0.008977 | 30233800  | 30234084  | 30422181  | 30423131  |
| 427 NA19007 | [2515685 chr15 | 15 | 30497960  | 30514406  | 16447  | 35  | -0.363163 | 0.02098  | 30497199  | 30498721  | 30514167  | 30514647  |
| 428 NA19007 | [2515685 chr15 | 15 | 30545232  | 30558479  | 13248  | 24  | -0.273707 | 0.025677 | 30544939  | 30545526  | 30558184  | 30558777  |
| 429 NA19007 | [2515685 chr15 | 15 | 32461224  | 32465030  | 3807   | 5   | 0.288916  | 0.046865 | 32460923  | 32461525  | 32464593  | 32465461  |
| 430 NA19007 | [2515685 chr15 | 15 | 32465817  | 32654853  | 189037 | 192 | 0.566807  | 0.009678 | 32465468  | 32466166  | 32654165  | 32655547  |
| 431 NA19007 | [2515685 chr15 | 15 | 43106834  | 43111174  | 4341   | 5   | 0.498908  | 0.064008 | 43106498  | 43107171  | 43111071  | 43111277  |
| 432 NA19007 | [2515685 chr15 | 15 | 49408022  | 49410120  | 2099   | 2   | -0.567331 | 0.102946 | 49406890  | 49409154  | 49409717  | 49410527  |
| 433 NA19007 | [2515685 chr15 | 15 | 59490762  | 59495993  | 5232   | 2   | -0.62569  | 0.110563 | 59490146  | 59491378  | 59494114  | 59497877  |
| 434 NA19007 | [2515685 chr15 | 15 | 75117585  | 75119946  | 2362   | 4   | 0.926697  | 0.073219 | 75117343  | 75117827  | 75119741  | 75120157  |
| 435 NA19007 | [2515685 chr15 | 15 | 89720231  | 89721873  | 1643   | 2   | -0.583352 | 0.111537 | 89719629  | 89720833  | 89721531  | 89722211  |
| 436 NA19007 | [2515685 chr15 | 15 | 100109640 | 100122682 | 13043  | 98  | 0.723053  | 0.011488 | 100108905 | 100110376 | 100122315 | 100123057 |
| 437 NA19007 | [2515685 chr16 | 16 | 946002    | 948831    | 2830   | 2   | -1.053196 | 0.113806 | 945660    | 946345    | 947314    | 950345    |
| 438 NA19007 | [2515685 chr16 | 16 | 1099605   | 1126932   | 27328  | 26  | -0.482329 | 0.028776 | 1099252   | 1099958   | 1125050   | 11306147  |
| 439 NA19007 | [2515685 chr16 | 16 | 2120887   | 2126876   | 5990   | 6   | -0.285215 | 0.049033 | 2118476   | 2122769   | 2125012   | 2128747   |
| 440 NA19007 | [2515685 chr16 | 16 | 7027447   | 7031849   | 4403   | 2   | -0.564945 | 0.109327 | 7025772   | 7029122   | 7030616   | 7033082   |
| 441 NA19007 | [2515685 chr16 | 16 | 12550392  | 12553526  | 3135   | 3   | -0.424626 | 0.082462 | 12549915  | 12550869  | 12552957  | 12554091  |
| 442 NA19007 | [2515685 chr16 | 16 | 12563891  | 12565579  | 1689   | 2   | -1.030088 | 0.106604 | 12563523  | 12564260  | 12565191  | 12565961  |
| 443 NA19007 | [2515685 chr16 | 16 | 14896194  | 14908175  | 11982  | 30  | -0.458712 | 0.023916 | 14896075  | 14896314  | 14907917  | 14908437  |
| 444 NA19007 | [2515685 chr16 | 16 | 14910673  | 14913870  | 3198   | 4   | -0.445836 | 0.056745 | 14910391  | 14910955  | 14913863  | 14913877  |
| 445 NA19007 | [2515685 chr16 | 16 | 14955818  | 15030359  | 74542  | 68  | -0.567499 | 0.018129 | 14955356  | 14956281  | 15029969  | 15030751  |
| 446 NA19007 | [2515685 chr16 | 16 | 15153813  | 15162276  | 8464   | 20  | -0.260472 | 0.026166 | 15153776  | 15153776  | 15161494  | 15163051  |
| 447 NA19007 | [2515685 chr16 | 16 | 16294885  | 16306828  | 11944  | 26  | -0.421284 | 0.025081 | 16294729  | 16295041  | 16306570  | 16307081  |
| 448 NA19007 | [2515685 chr16 | 16 | 16633469  | 16639120  | 5652   | 4   | 0.64165   | 0.075331 | 16632502  | 16634437  | 16638386  | 16639857  |
| 449 NA19007 | [2515685 chr16 | 16 | 16703782  | 16704883  | 1102   | 2   | -0.5441   | 0.090048 | 16702971  | 16704593  | 16704736  | 16705031  |
| 450 NA19007 | [2515685 chr16 | 16 | 18397576  | 18427583  | 30008  | 72  | -0.294656 | 0.014888 | 18397373  | 18397779  | 18427110  | 18428057  |
| 451 NA19007 | [2515685 chr16 | 16 | 18574518  | 18575622  | 1105   | 2   | -0.5441   | 0.090048 | 18574371  | 18574665  | 18574808  | 18576437  |



|             |                |    |          |          |        |     |           |          |          |          |          |          |
|-------------|----------------|----|----------|----------|--------|-----|-----------|----------|----------|----------|----------|----------|
| 452 NA19007 | [2515685 chr16 | 16 | 18921069 | 18923947 | 2879   | 2   | -0.97894  | 0.118379 | 18920630 | 18921509 | 18923084 | 18924810 |
| 453 NA19007 | [2515685 chr16 | 16 | 21321436 | 21323686 | 2251   | 13  | 0.271989  | 0.0293   | 21321333 | 21321540 | 21323533 | 21323831 |
| 454 NA19007 | [2515685 chr16 | 16 | 21753870 | 21756137 | 2268   | 15  | 0.273176  | 0.026634 | 21753767 | 21753974 | 21755984 | 21756291 |
| 455 NA19007 | [2515685 chr16 | 16 | 22452875 | 22454874 | 2000   | 13  | 0.273042  | 0.028688 | 22452722 | 22453028 | 22454771 | 22454971 |
| 456 NA19007 | [2515685 chr16 | 16 | 28324617 | 28335549 | 10933  | 10  | 0.340445  | 0.046313 | 28324569 | 28324665 | 28334190 | 28336901 |
| 457 NA19007 | [2515685 chr16 | 16 | 28522768 | 28525408 | 2641   | 3   | -0.402524 | 0.077413 | 28522366 | 28523170 | 28525115 | 28525701 |
| 458 NA19007 | [2515685 chr16 | 16 | 28617225 | 28626775 | 9551   | 10  | 0.369738  | 0.047358 | 28615757 | 28618694 | 28625773 | 28627771 |
| 459 NA19007 | [2515685 chr16 | 16 | 29300574 | 29302684 | 2111   | 11  | 0.269295  | 0.031421 | 29300408 | 29300741 | 29302391 | 29302971 |
| 460 NA19007 | [2515685 chr16 | 16 | 29374376 | 29375932 | 1557   | 2   | 0.463234  | 0.080918 | 29374022 | 29374731 | 29375721 | 29376141 |
| 461 NA19007 | [2515685 chr16 | 16 | 30142181 | 30144224 | 2044   | 14  | 0.268382  | 0.027445 | 30142078 | 30142285 | 30144043 | 30144401 |
| 462 NA19007 | [2515685 chr16 | 16 | 32159898 | 32160377 | 480    | 2   | -1.93781  | 0.099596 | 32159453 | 32160343 | 32160346 | 32160401 |
| 463 NA19007 | [2515685 chr16 | 16 | 32606692 | 32607163 | 472    | 2   | -1.9377   | 0.099593 | 32606661 | 32606724 | 32606727 | 32607591 |
| 464 NA19007 | [2515685 chr16 | 16 | 33100875 | 33101346 | 472    | 2   | -1.937695 | 0.099593 | 33100438 | 33101312 | 33101315 | 33101371 |
| 465 NA19007 | [2515685 chr16 | 16 | 33157406 | 33157879 | 474    | 2   | -1.937699 | 0.099593 | 33156967 | 33157845 | 33157848 | 33157911 |
| 466 NA19007 | [2515685 chr16 | 16 | 33206787 | 33217055 | 10269  | 19  | 0.279956  | 0.026454 | 33206624 | 33206951 | 33216946 | 33217161 |
| 467 NA19007 | [2515685 chr16 | 16 | 33436556 | 33447535 | 10980  | 22  | 0.261558  | 0.029952 | 33436101 | 33437012 | 33447235 | 33447831 |
| 468 NA19007 | [2515685 chr16 | 16 | 34321824 | 34606125 | 284302 | 322 | -0.534917 | 0.008234 | 34317185 | 34323706 | 34605058 | 34607191 |
| 469 NA19007 | [2515685 chr16 | 16 | 57204541 | 57207585 | 3045   | 3   | 5.820158  | 0.234635 | 57204170 | 57204913 | 57206938 | 57208231 |
| 470 NA19007 | [2515685 chr16 | 16 | 68602449 | 68666721 | 64273  | 59  | -0.416211 | 0.01908  | 68602144 | 68602755 | 68666385 | 68667051 |
| 471 NA19007 | [2515685 chr16 | 16 | 76928915 | 76942282 | 13368  | 11  | 0.653185  | 0.043207 | 76928609 | 76929221 | 76941602 | 76942961 |
| 472 NA19007 | [2515685 chr16 | 16 | 83994929 | 84004171 | 9243   | 81  | 0.356838  | 0.013902 | 83994558 | 83995300 | 84003767 | 84004571 |
| 473 NA19007 | [2515685 chr16 | 16 | 84562720 | 84565235 | 2516   | 11  | 0.595646  | 0.046391 | 84561685 | 84563756 | 84565142 | 84565321 |
| 474 NA19007 | [2515685 chr16 | 16 | 86669849 | 86672366 | 2518   | 2   | -4.473511 | 0.202515 | 86669288 | 86670411 | 86671217 | 86673511 |
| 475 NA19007 | [2515685 chr16 | 16 | 88710329 | 88712266 | 1938   | 10  | -0.550894 | 0.052349 | 88710203 | 88710456 | 88712200 | 88712331 |
| 476 NA19007 | [2515685 chr17 | 17 | 911980   | 915554   | 3575   | 4   | -0.796374 | 0.0769   | 911452   | 915413   | 915413   | 915691   |
| 477 NA19007 | [2515685 chr17 | 17 | 966845   | 969578   | 2734   | 21  | 0.367721  | 0.034757 | 966537   | 967154   | 969378   | 969775   |
| 478 NA19007 | [2515685 chr17 | 17 | 18297586 | 18331739 | 34154  | 47  | 0.288173  | 0.020848 | 18297407 | 18297765 | 18331509 | 18331971 |
| 479 NA19007 | [2515685 chr17 | 17 | 18331739 | 18332345 | 607    | 2   | -0.816148 | 0.098544 | 18331509 | 18331970 | 18331978 | 18332711 |
| 480 NA19007 | [2515685 chr17 | 17 | 20299935 | 20300531 | 597    | 2   | -0.816144 | 0.098544 | 20299568 | 20300303 | 20300311 | 20300751 |
| 481 NA19007 | [2515685 chr17 | 17 | 20300531 | 20330997 | 30467  | 41  | 0.285232  | 0.021936 | 20300311 | 20300751 | 20309940 | 20332051 |
| 482 NA19007 | [2515685 chr17 | 17 | 31430406 | 31431441 | 1036   | 2   | 0.418937  | 0.019469 | 31429658 | 31431155 | 31431198 | 31431681 |
| 483 NA19007 | [2515685 chr17 | 17 | 31434845 | 31461078 | 26234  | 44  | 0.418937  | 0.019469 | 31434318 | 31435373 | 31460534 | 31461621 |
| 484 NA19007 | [2515685 chr17 | 17 | 31531259 | 31578624 | 47366  | 69  | 0.388775  | 0.007377 | 31531038 | 31531480 | 31578609 | 31578641 |
| 485 NA19007 | [2515685 chr17 | 17 | 31618451 | 31680187 | 61737  | 83  | 0.388775  | 0.007377 | 31618189 | 31618713 | 31680172 | 31680201 |
| 486 NA19007 | [2515685 chr17 | 17 | 31832940 | 31835531 | 2592   | 9   | 0.25035   | 0.039989 | 31832684 | 31833196 | 31835215 | 31835841 |
| 487 NA19007 | [2515685 chr17 | 17 | 32829500 | 32833231 | 3732   | 5   | 0.912501  | 0.075834 | 32828825 | 32830175 | 32832670 | 32833791 |
| 488 NA19007 | [2515685 chr17 | 17 | 33308015 | 33311261 | 3247   | 2   | 0.536109  | 0.088973 | 33307576 | 33308455 | 33310958 | 33311561 |
| 489 NA19007 | [2515685 chr17 | 17 | 33395919 | 33409581 | 13663  | 11  | -0.394775 | 0.044449 | 33395884 | 33395955 | 33409045 | 33410111 |
| 490 NA19007 | [2515685 chr17 | 17 | 33425145 | 33430792 | 5648   | 10  | -0.658372 | 0.045771 | 33424532 | 33425759 | 33428591 | 33529291 |
| 491 NA19007 | [2515685 chr17 | 17 | 33654387 | 33659558 | 5172   | 12  | -0.657429 | 0.042285 | 33653601 | 33655173 | 33658997 | 33660111 |
| 492 NA19007 | [2515685 chr17 | 17 | 36675530 | 36685343 | 9814   | 10  | -0.806519 | 0.0488   | 36675011 | 36676049 | 36684647 | 36686041 |
| 493 NA19007 | [2515685 chr17 | 17 | 42905976 | 42912650 | 6675   | 3   | 0.584671  | 0.110264 | 42905585 | 42906368 | 42911014 | 42914281 |
| 494 NA19007 | [2515685 chr17 | 17 | 42970703 | 42975972 | 5270   | 11  | -0.55012  | 0.043835 | 42970185 | 42971221 | 42975162 | 42976781 |
| 495 NA19007 | [2515685 chr18 | 18 | 2172     | 41876    | 39705  | 11  | 0.346083  | 0.042623 | 1        | 4344     | 37292    | 58441    |
| 496 NA19007 | [2515685 chr18 | 18 | 28142218 | 28143399 | 1182   | 2   | 0.693285  | 0.113732 | 28141854 | 28142583 | 28143055 | 28143741 |
| 497 NA19007 | [2515685 chr18 | 18 | 32408046 | 32411286 | 3241   | 2   | -0.60847  | 0.100308 | 32407624 | 32408469 | 32410546 | 32412021 |
| 498 NA19007 | [2515685 chr18 | 18 | 42797012 | 42815384 | 18373  | 21  | -0.267738 | 0.02772  | 42796537 | 42797488 | 42810800 | 42889151 |
| 499 NA19007 | [2515685 chr18 | 18 | 63110008 | 63117706 | 7699   | 9   | -0.86447  | 0.0536   | 63109644 | 63110373 | 63116010 | 63119401 |
| 500 NA19007 | [2515685 chr18 | 18 | 64896052 | 64907736 | 11685  | 13  | -0.891093 | 0.044113 | 64894789 | 64897315 | 64907228 | 64908241 |
| 501 NA19007 | [2515685 chr18 | 18 | 67744542 | 68034487 | 289946 | 294 | -0.931843 | 0.009392 | 67738923 | 67749126 | 68033107 | 68035861 |
| 502 NA19007 | [2515685 chr18 | 18 | 74230393 | 74234275 | 3883   | 31  | -0.762441 | 0.017769 | 74229835 | 74230952 | 74234139 | 74234411 |
| 503 NA19007 | [2515685 chr18 | 18 | 74297715 | 74299391 | 1677   | 5   | 0.66653   | 0.064683 | 74297243 | 74298187 | 74299167 | 74299611 |
| 504 NA19007 | [2515685 chr18 | 18 | 74373005 | 74379534 | 6530   | 10  | 0.409613  | 0.03485  | 74372064 | 74373947 | 74378860 | 74380201 |
| 505 NA19007 | [2515685 chr18 | 18 | 74392800 | 74398225 | 5426   | 4   | 0.739677  | 0.075761 | 74390826 | 74394774 | 74397790 | 74398661 |
| 506 NA19007 | [2515685 chr19 | 19 | 35104    | 64984    | 29881  | 16  | 0.334041  | 0.034659 | 34925    | 35284    | 64446    | 65522    |

|             |                |    |          |          |        |     |           |          |          |          |          |          |
|-------------|----------------|----|----------|----------|--------|-----|-----------|----------|----------|----------|----------|----------|
| 507 NA19007 | [2515685 chr19 | 19 | 310414   | 312953   | 2540   | 14  | -0.638312 | 0.03819  | 309687   | 311142   | 312913   | 312994   |
| 508 NA19007 | [2515685 chr19 | 19 | 331568   | 333129   | 1562   | 2   | 0.971839  | 0.09986  | 331314   | 331822   | 332310   | 333948   |
| 509 NA19007 | [2515685 chr19 | 19 | 20388989 | 20510144 | 121156 | 67  | -0.477552 | 0.018181 | 20388802 | 20389176 | 20509558 | 20510731 |
| 510 NA19007 | [2515685 chr19 | 19 | 22931049 | 22934759 | 3711   | 3   | 0.797225  | 0.106638 | 22918199 | 22933577 | 22934546 | 22934971 |
| 511 NA19007 | [2515685 chr19 | 19 | 23007903 | 23014812 | 6910   | 7   | 0.730605  | 0.061367 | 22990964 | 23010431 | 23014157 | 23015461 |
| 512 NA19007 | [2515685 chr19 | 19 | 24146401 | 24146489 | 89     | 2   | -0.939719 | 0.104649 | 24146490 | 24146412 | 24146475 | 24146501 |
| 513 NA19007 | [2515685 chr19 | 19 | 39419837 | 39422498 | 2662   | 4   | 0.650667  | 0.080119 | 39419616 | 39420059 | 39421681 | 39423311 |
| 514 NA19007 | [2515685 chr19 | 19 | 40540866 | 40541878 | 1013   | 3   | -0.79031  | 0.085489 | 40540646 | 40541086 | 40541551 | 40542201 |
| 515 NA19007 | [2515685 chr19 | 19 | 40543556 | 40545135 | 1580   | 3   | -3.826367 | 0.18431  | 40543292 | 40543821 | 40544782 | 40545481 |
| 516 NA19007 | [2515685 chr19 | 19 | 40547370 | 40553596 | 6227   | 2   | -4.410214 | 0.251895 | 40546632 | 40548109 | 40553353 | 40553841 |
| 517 NA19007 | [2515685 chr19 | 19 | 40553596 | 40554347 | 752    | 2   | -0.597427 | 0.094302 | 40553353 | 40553840 | 40554020 | 40554671 |
| 518 NA19007 | [2515685 chr19 | 19 | 41532761 | 41540854 | 8094   | 2   | 0.673362  | 0.110811 | 41532090 | 41533433 | 41538691 | 41543011 |
| 519 NA19007 | [2515685 chr19 | 19 | 46041888 | 46072673 | 30786  | 35  | -0.343952 | 0.024768 | 46041727 | 46042050 | 46072511 | 46072831 |
| 520 NA19007 | [2515685 chr19 | 19 | 48409526 | 48455071 | 45546  | 26  | -0.275713 | 0.028396 | 48408041 | 48411011 | 48454856 | 48455281 |
| 521 NA19007 | [2515685 chr19 | 19 | 49605490 | 49612175 | 6686   | 7   | 0.325094  | 0.055242 | 49604901 | 49606080 | 49611490 | 49612861 |
| 522 NA19007 | [2515685 chr19 | 19 | 56788987 | 56796263 | 7277   | 8   | 0.266869  | 0.052665 | 56788678 | 56789297 | 56796063 | 56796461 |
| 523 NA19007 | [2515685 chr19 | 19 | 56824422 | 56827216 | 2795   | 5   | -0.656897 | 0.064578 | 56824136 | 56824709 | 56826331 | 56828101 |
| 524 NA19007 | [2515685 chr19 | 19 | 56827216 | 56836311 | 9096   | 7   | -4.700468 | 0.130396 | 56826331 | 56828101 | 56834905 | 56837711 |
| 525 NA19007 | [2515685 chr19 | 19 | 56836311 | 56838549 | 2239   | 2   | -0.861637 | 0.10003  | 56834905 | 56837718 | 56838287 | 56838811 |
| 526 NA19007 | [2515685 chr19 | 19 | 56839030 | 56840752 | 1723   | 3   | -2.694199 | 0.142376 | 56838811 | 56839249 | 56840372 | 56841131 |
| 527 NA19007 | [2515685 chr19 | 19 | 56840752 | 56841964 | 1213   | 3   | -0.626505 | 0.077128 | 56840372 | 56841133 | 56841608 | 56842321 |
| 528 NA19007 | [2515685 chr19 | 19 | 58169057 | 58171564 | 2508   | 2   | 0.655434  | 0.094314 | 58168791 | 58169324 | 58171021 | 58172101 |
| 529 NA19007 | [2515685 chr19 | 19 | 58209430 | 58245460 | 36031  | 28  | -0.750889 | 0.027815 | 58208997 | 58209863 | 58245024 | 58245891 |
| 530 NA19007 | [2515685 chr19 | 19 | 59247755 | 59252981 | 5227   | 6   | 0.805255  | 0.063393 | 59246427 | 59249084 | 59252269 | 59253691 |
| 531 NA19007 | [2515685 chr19 | 19 | 60166764 | 60173610 | 6847   | 3   | 0.54275   | 0.062347 | 60165407 | 60168121 | 60172279 | 60174941 |
| 532 NA19007 | [2515685 chr19 | 19 | 60958920 | 60976029 | 17110  | 15  | -0.572701 | 0.037869 | 60957933 | 60959907 | 60975748 | 60976311 |
| 533 NA19007 | [2515685 chr20 | 20 | 1511097  | 1532477  | 21381  | 26  | -2.578842 | 0.051433 | 1510534  | 1511660  | 1532182  | 1532771  |
| 534 NA19007 | [2515685 chr20 | 20 | 1533575  | 1544060  | 10486  | 15  | -0.330861 | 0.032045 | 1533384  | 1533766  | 1543588  | 1544531  |
| 535 NA19007 | [2515685 chr20 | 20 | 15249645 | 15251805 | 2161   | 2   | -0.892869 | 0.100871 | 15249381 | 15249909 | 15251287 | 15252321 |
| 536 NA19007 | [2515685 chr20 | 20 | 26147697 | 26161501 | 13805  | 23  | -0.358566 | 0.030185 | 26147451 | 26147944 | 26161227 | 26161771 |
| 537 NA19007 | [2515685 chr20 | 20 | 45883995 | 45889273 | 5279   | 6   | -0.269352 | 0.052079 | 45883696 | 45884294 | 45888652 | 45889891 |
| 538 NA19007 | [2515685 chr20 | 20 | 59951513 | 59957050 | 5538   | 18  | 0.290458  | 0.031921 | 59950681 | 59952345 | 59956538 | 59957561 |
| 539 NA19007 | [2515685 chr20 | 20 | 62066380 | 62068214 | 1835   | 8   | 1.866826  | 0.063733 | 62066146 | 62066615 | 62067671 | 62068751 |
| 540 NA19007 | [2515685 chr21 | 21 | 22576580 | 22588071 | 11492  | 12  | -0.936806 | 0.049738 | 22576051 | 22577109 | 22587425 | 22588711 |
| 541 NA19007 | [2515685 chr21 | 21 | 29144838 | 29188360 | 43523  | 35  | 0.537221  | 0.025054 | 29136621 | 29150273 | 29187593 | 29189121 |
| 542 NA19007 | [2515685 chr22 | 22 | 14480937 | 14747237 | 266301 | 505 | -0.340513 | 0.005289 | 14480862 | 14481012 | 14746998 | 14747471 |
| 543 NA19007 | [2515685 chr22 | 22 | 14749840 | 14816986 | 67147  | 117 | -0.340513 | 0.005289 | 14749504 | 14750176 | 14814459 | 14819511 |
| 544 NA19007 | [2515685 chr22 | 22 | 17032140 | 17135187 | 103048 | 158 | -0.309821 | 0.010461 | 17031480 | 17032801 | 17134882 | 17135491 |
| 545 NA19007 | [2515685 chr22 | 22 | 17224644 | 17233796 | 9153   | 22  | -0.356341 | 0.027593 | 17224420 | 17224868 | 17233522 | 17234071 |
| 546 NA19007 | [2515685 chr22 | 22 | 17385504 | 17397941 | 12438  | 22  | -0.28476  | 0.031246 | 17385031 | 17385977 | 17397517 | 17398361 |
| 547 NA19007 | [2515685 chr22 | 22 | 18689531 | 19006457 | 316927 | 313 | -0.360086 | 0.007671 | 18686307 | 18692211 | 19006070 | 19006841 |
| 548 NA19007 | [2515685 chr22 | 22 | 19380073 | 19419486 | 39414  | 12  | -0.493311 | 0.043363 | 19377752 | 19382395 | 19416806 | 19449921 |
| 549 NA19007 | [2515685 chr22 | 22 | 19830324 | 19886245 | 55922  | 82  | -0.318781 | 0.01421  | 19829940 | 19830709 | 19885906 | 19886581 |
| 550 NA19007 | [2515685 chr22 | 22 | 19977363 | 20042869 | 65507  | 89  | -0.359998 | 0.007188 | 19977139 | 19977587 | 20042584 | 20043151 |
| 551 NA19007 | [2515685 chr22 | 22 | 20047736 | 20121795 | 74060  | 118 | -0.359998 | 0.007188 | 20047456 | 20048017 | 20121548 | 20122041 |
| 552 NA19007 | [2515685 chr22 | 22 | 20137248 | 20243641 | 106394 | 148 | -0.359998 | 0.007188 | 20136561 | 20137935 | 20240961 | 20302281 |
| 553 NA19007 | [2515685 chr22 | 22 | 22600453 | 22604850 | 4398   | 2   | -2.877308 | 0.170972 | 22598667 | 22602240 | 22603026 | 22606671 |
| 554 NA19007 | [2515685 chr22 | 22 | 22683930 | 22690382 | 6453   | 5   | -2.043056 | 0.103068 | 22681309 | 22686552 | 22690146 | 22690611 |
| 555 NA19007 | [2515685 chr22 | 22 | 33619409 | 33622591 | 3183   | 4   | 0.94656   | 0.077685 | 33618939 | 33619879 | 33622541 | 33622641 |
| 556 NA19007 | [2515685 chr22 | 22 | 37683358 | 37711759 | 28402  | 27  | -0.650368 | 0.02784  | 37683063 | 37683653 | 37711022 | 37712491 |
| 557 NA19007 | [2515685 chr22 | 22 | 41214550 | 41305837 | 91288  | 83  | 0.257129  | 0.014692 | 41213953 | 41215148 | 41305603 | 41306071 |
| 558 NA19007 | [2515685 chr22 | 22 | 43790663 | 43878995 | 88333  | 3   | -0.566956 | 0.090967 | 43700090 | 43793343 | 43876436 | 43881551 |
| 559 NA19007 | [2515685 chrX  | 23 | 1863641  | 1865837  | 2197   | 4   | -0.46794  | 0.073771 | 1862943  | 1864339  | 1865399  | 1866271  |
| 560 NA19007 | [2515685 chrX  | 23 | 1979394  | 1983878  | 4485   | 15  | 0.623378  | 0.036355 | 1979134  | 1979654  | 1982685  | 1985071  |
| 561 NA19007 | [2515685 chrX  | 23 | 2286200  | 2288297  | 2098   | 2   | 0.853691  | 0.089976 | 2285671  | 2286730  | 2287550  | 2289041  |

|             |               |    |           |           |        |     |           |          |           |           |           |           |
|-------------|---------------|----|-----------|-----------|--------|-----|-----------|----------|-----------|-----------|-----------|-----------|
| 562 NA19007 | [2515685 chrX | 23 | 9182407   | 9192056   | 9650   | 13  | 0.743643  | 0.039829 | 9181838   | 9182977   | 9191527   | 9192586   |
| 563 NA19007 | [2515685 chrX | 23 | 38340304  | 38343955  | 3652   | 2   | -4.110905 | 0.185545 | 38339963  | 38340645  | 38341288  | 3834662:  |
| 564 NA19007 | [2515685 chrX | 23 | 56677475  | 56690665  | 13191  | 31  | 0.433195  | 0.018461 | 56677130  | 56677820  | 56690311  | 5669101!  |
| 565 NA19007 | [2515685 chrX | 23 | 56701963  | 56703209  | 1247   | 2   | 0.692655  | 0.120289 | 56701752  | 56702175  | 56702945  | 5670347:  |
| 566 NA19007 | [2515685 chrX | 23 | 70741274  | 70745998  | 4725   | 38  | -0.356544 | 0.025378 | 70739871  | 70742677  | 70744597  | 7074740!  |
| 567 NA19007 | [2515685 chrX | 23 | 103133933 | 103143075 | 9143   | 2   | 0.526424  | 0.098736 | 103130384 | 103137482 | 103142681 | 10314347! |
| 568 NA19007 | [2515685 chrX | 23 | 119791965 | 119849730 | 57766  | 79  | -0.558508 | 0.011488 | 119791661 | 119792270 | 119845759 | 11985498  |
| 569 NA19007 | [2515685 chrX | 23 | 140244231 | 140245198 | 968    | 2   | -1.189469 | 0.136757 | 140243934 | 140244529 | 140244899 | 14024549  |
| 570 NA19007 | [2515685 chrX | 23 | 140258412 | 140269399 | 10988  | 2   | -0.668867 | 0.10468  | 140257239 | 140259586 | 140269160 | 14026963! |
| 571 NA19007 | [2515685 chrX | 23 | 140718840 | 140720134 | 1295   | 2   | 0.522697  | 0.099581 | 140718574 | 140719107 | 140719983 | 14072028  |
| 572 NA19007 | [2515685 chrX | 23 | 154721706 | 154722677 | 972    | 2   | 0.718323  | 0.120612 | 154721235 | 154722178 | 154722342 | 15472301! |
| 573 NA19007 | [2515685 chrX | 23 | 154814407 | 154822878 | 8472   | 9   | 0.26974   | 0.045494 | 154813623 | 154815191 | 154821492 | 15482426: |
| 574 NA19007 | [2515685 chrY | 24 | 1863641   | 1865837   | 2197   | 4   | -0.46794  | 0.073771 | 1862943   | 1864339   | 1865399   | 1866276!  |
| 575 NA19007 | [2515685 chrY | 24 | 1979394   | 1983878   | 4485   | 15  | 0.623378  | 0.036355 | 1979134   | 1979654   | 1982685   | 198507:   |
| 576 NA19007 | [2515685 chrY | 24 | 2286200   | 2288297   | 2098   | 2   | 0.853691  | 0.089976 | 2285671   | 2286730   | 2287550   | 228904!   |
| 577 NA19007 | [2515685 chrY | 24 | 23628713  | 23649003  | 20291  | 38  | -0.444233 | 0.018911 | 23628548  | 23628879  | 23648757  | 2364924!  |
| 578 NA19007 | [2515685 chrY | 24 | 23716390  | 23741767  | 25378  | 63  | -0.445191 | 0.014436 | 23716144  | 23716636  | 23741434  | 2374210!  |
| 579 NA19007 | [2515685 chrY | 24 | 25266900  | 25284425  | 17526  | 45  | -0.559504 | 0.01831  | 25266567  | 25267234  | 25284278  | 2528457:  |
| 580 NA19007 | [2515685 chrY | 24 | 25341625  | 25362431  | 20807  | 44  | -0.496283 | 0.018026 | 25341379  | 25341871  | 25359491  | 2536650!  |
| 581 NA19007 | [2515685 chrY | 24 | 57599133  | 57600104  | 972    | 2   | 0.718324  | 0.120612 | 57598662  | 57599605  | 57599769  | 5760044!  |
| 1 NA18975   | [2515685 chr1 | 1  | 897       | 76985     | 76089  | 118 | 0.292619  | 0.013052 | 1         | 1794      | 76641     | 77329     |
| 2 NA18975   | [2515685 chr1 | 1  | 601044    | 612159    | 11116  | 8   | -1.22004  | 0.056143 | 587801    | 604315    | 610122    | 614196!   |
| 3 NA18975   | [2515685 chr1 | 1  | 3469925   | 3474794   | 4870   | 4   | -0.328862 | 0.062266 | 3469291   | 3470560   | 3474475   | 347511:   |
| 4 NA18975   | [2515685 chr1 | 1  | 10416438  | 10418311  | 1874   | 2   | -0.719855 | 0.09591  | 10415863  | 10417014  | 10417712  | 1041891!  |
| 5 NA18975   | [2515685 chr1 | 1  | 12843376  | 12863840  | 20465  | 27  | 0.370852  | 0.025688 | 12843104  | 12843649  | 12860569  | 1286861:  |
| 6 NA18975   | [2515685 chr1 | 1  | 12884329  | 12886858  | 2530   | 4   | 0.517282  | 0.056952 | 12884224  | 12884434  | 12886536  | 1288718!  |
| 7 NA18975   | [2515685 chr1 | 1  | 12887630  | 12888178  | 549    | 2   | 0.471371  | 0.082978 | 12887352  | 12887909  | 12887924  | 1288843:  |
| 8 NA18975   | [2515685 chr1 | 1  | 13084062  | 13091899  | 7838   | 5   | -0.376379 | 0.056555 | 13084055  | 13084070  | 13091561  | 1309223:  |
| 9 NA18975   | [2515685 chr1 | 1  | 13159940  | 13162706  | 2767   | 4   | 0.545383  | 0.052611 | 13159618  | 13160263  | 13162366  | 1316304!  |
| 10 NA18975  | [2515685 chr1 | 1  | 13368830  | 13373969  | 5140   | 8   | 0.274837  | 0.039993 | 13368443  | 13369217  | 13373608  | 1337433!  |
| 11 NA18975  | [2515685 chr1 | 1  | 13379417  | 13379965  | 549    | 2   | 0.471371  | 0.082978 | 13379164  | 13379671  | 13379686  | 1338024!  |
| 12 NA18975  | [2515685 chr1 | 1  | 13380737  | 13383503  | 2767   | 4   | 0.545385  | 0.052611 | 13380415  | 13381060  | 13383163  | 1338384:  |
| 13 NA18975  | [2515685 chr1 | 1  | 13450095  | 13457066  | 6972   | 3   | -0.328923 | 0.065432 | 13449190  | 13451001  | 13456679  | 1345745:  |
| 14 NA18975  | [2515685 chr1 | 1  | 16983252  | 17005532  | 22281  | 25  | -0.373416 | 0.030461 | 16982953  | 16983552  | 17004616  | 1700644!  |
| 15 NA18975  | [2515685 chr1 | 1  | 25330950  | 25409968  | 79019  | 78  | 0.361985  | 0.016091 | 25330662  | 25331238  | 25409763  | 2541017:  |
| 16 NA18975  | [2515685 chr1 | 1  | 25434181  | 25487481  | 53301  | 27  | 0.265262  | 0.027737 | 25433990  | 25434373  | 25484210  | 2551293:  |
| 17 NA18975  | [2515685 chr1 | 1  | 40219272  | 40222606  | 3335   | 2   | -0.628037 | 0.100279 | 40217103  | 40221441  | 40222380  | 4022283:  |
| 18 NA18975  | [2515685 chr1 | 1  | 89188117  | 89190762  | 2646   | 5   | 1.954412  | 0.095164 | 89187764  | 89188470  | 89190458  | 8919106!  |
| 19 NA18975  | [2515685 chr1 | 1  | 103827497 | 103834166 | 6670   | 16  | 0.550267  | 0.0339   | 103827175 | 103827820 | 103833999 | 10383433: |
| 20 NA18975  | [2515685 chr1 | 1  | 103848294 | 103866317 | 18024  | 27  | 0.689568  | 0.007857 | 103842566 | 103851565 | 103865345 | 10386729! |
| 21 NA18975  | [2515685 chr1 | 1  | 103873304 | 104015739 | 142436 | 230 | 0.689568  | 0.007857 | 103873021 | 103873587 | 104013178 | 10401830! |
| 22 NA18975  | [2515685 chr1 | 1  | 104022641 | 104029695 | 7055   | 5   | 0.350683  | 0.064984 | 104022431 | 104022851 | 104028575 | 10403081! |
| 23 NA18975  | [2515685 chr1 | 1  | 105728161 | 105735462 | 7302   | 8   | -0.953913 | 0.060909 | 105727820 | 105728503 | 105734532 | 10573639! |
| 24 NA18975  | [2515685 chr1 | 1  | 108514938 | 108565175 | 50238  | 59  | 0.354094  | 0.019345 | 108514864 | 108515012 | 108565023 | 10856532! |
| 25 NA18975  | [2515685 chr1 | 1  | 108637709 | 108688767 | 51059  | 61  | 0.368885  | 0.018851 | 108637480 | 108637939 | 108688693 | 10868884! |
| 26 NA18975  | [2515685 chr1 | 1  | 109936541 | 109953240 | 16700  | 22  | 0.643719  | 0.030814 | 109935803 | 109937279 | 109952761 | 10995372! |
| 27 NA18975  | [2515685 chr1 | 1  | 112405902 | 112416691 | 10790  | 10  | 0.698929  | 0.050796 | 112405415 | 112406389 | 112416423 | 11241696! |
| 28 NA18975  | [2515685 chr1 | 1  | 142744385 | 142745273 | 889    | 2   | 0.671922  | 0.117971 | 142743794 | 142744976 | 142745023 | 14274552! |
| 29 NA18975  | [2515685 chr1 | 1  | 145368616 | 145373702 | 5087   | 10  | -0.261302 | 0.036966 | 145368296 | 145368936 | 145373422 | 14537398! |
| 30 NA18975  | [2515685 chr1 | 1  | 145530660 | 145535965 | 5306   | 12  | -0.253671 | 0.03477  | 145530340 | 145530980 | 145535466 | 14553646! |
| 31 NA18975  | [2515685 chr1 | 1  | 145819541 | 145840436 | 20896  | 24  | 0.388097  | 0.030778 | 145819262 | 145819821 | 145840201 | 14584067! |
| 32 NA18975  | [2515685 chr1 | 1  | 145855193 | 145859584 | 4392   | 3   | 0.597707  | 0.083428 | 145848112 | 145858464 | 145859395 | 14585977: |
| 33 NA18975  | [2515685 chr1 | 1  | 145876360 | 145879495 | 3136   | 2   | 0.524748  | 0.084801 | 145876052 | 145876669 | 145879264 | 14587972! |
| 34 NA18975  | [2515685 chr1 | 1  | 145886165 | 145900995 | 14831  | 11  | 0.387407  | 0.043587 | 145885500 | 145886831 | 145900795 | 14590119! |
| 35 NA18975  | [2515685 chr1 | 1  | 145920044 | 145973827 | 53784  | 58  | 0.402162  | 0.019216 | 145919709 | 145920380 | 145973620 | 14597403! |

|            |               |   |           |           |        |     |           |          |           |           |           |          |
|------------|---------------|---|-----------|-----------|--------|-----|-----------|----------|-----------|-----------|-----------|----------|
| 36 NA18975 | [2515685 chr1 | 1 | 148998878 | 149005918 | 7041   | 13  | 0.724679  | 0.030351 | 148998401 | 148999355 | 149004680 | 14900715 |
| 37 NA18975 | [2515685 chr1 | 1 | 149368571 | 149384391 | 15821  | 2   | -1.215071 | 0.105872 | 149368105 | 149369038 | 149383444 | 14938533 |
| 38 NA18975 | [2515685 chr1 | 1 | 149385742 | 149399435 | 13694  | 19  | -2.911658 | 0.063167 | 149385339 | 149386145 | 149399080 | 14939979 |
| 39 NA18975 | [2515685 chr1 | 1 | 149573821 | 149583431 | 9611   | 5   | 0.971616  | 0.077445 | 149573460 | 149574182 | 149582912 | 14958395 |
| 40 NA18975 | [2515685 chr1 | 1 | 158224068 | 158225480 | 1413   | 2   | -0.442116 | 0.066408 | 15823552  | 158224584 | 158225276 | 15822568 |
| 41 NA18975 | [2515685 chr1 | 1 | 158231105 | 158232881 | 1777   | 2   | -0.442113 | 0.066408 | 158230227 | 158231984 | 158232676 | 15823308 |
| 42 NA18975 | [2515685 chr1 | 1 | 158245896 | 158247672 | 1777   | 2   | -0.442113 | 0.066408 | 158245018 | 158246775 | 158247467 | 15824787 |
| 43 NA18975 | [2515685 chr1 | 1 | 158253277 | 158255053 | 1777   | 2   | -0.442113 | 0.066408 | 158252398 | 158254156 | 158254848 | 15825525 |
| 44 NA18975 | [2515685 chr1 | 1 | 159083853 | 159085602 | 1750   | 2   | 0.541501  | 0.105618 | 159083104 | 159084603 | 159085334 | 15908587 |
| 45 NA18975 | [2515685 chr1 | 1 | 186057433 | 186276059 | 218627 | 216 | -0.86639  | 0.010776 | 186057175 | 186057691 | 186275512 | 18627660 |
| 46 NA18975 | [2515685 chr1 | 1 | 192541700 | 192547982 | 6283   | 3   | -0.412442 | 0.079493 | 192541312 | 192542088 | 192547786 | 19254817 |
| 47 NA18975 | [2515685 chr1 | 1 | 193452077 | 193552515 | 100439 | 84  | 0.500054  | 0.016135 | 193449476 | 193454678 | 193551981 | 19355305 |
| 48 NA18975 | [2515685 chr1 | 1 | 193615671 | 193651850 | 36180  | 33  | 0.251924  | 0.024837 | 193615441 | 193615901 | 193651615 | 19365208 |
| 49 NA18975 | [2515685 chr1 | 1 | 204210291 | 204215744 | 5454   | 8   | 0.293473  | 0.051365 | 204210088 | 204210494 | 204215470 | 20421601 |
| 50 NA18975 | [2515685 chr1 | 1 | 218762650 | 218771442 | 8793   | 8   | 0.433282  | 0.053464 | 218762212 | 218763089 | 218771135 | 21877175 |
| 51 NA18975 | [2515685 chr1 | 1 | 226117234 | 226125724 | 8491   | 2   | -0.700238 | 0.114582 | 226114786 | 226119683 | 226122453 | 22612975 |
| 52 NA18975 | [2515685 chr1 | 1 | 239368545 | 239498531 | 129987 | 15  | -0.406928 | 0.037853 | 239368239 | 239368851 | 239496181 | 23950088 |
| 53 NA18975 | [2515685 chr1 | 1 | 244872415 | 244874098 | 1684   | 5   | -0.410327 | 0.071577 | 244872245 | 244872585 | 244873799 | 24487439 |
| 54 NA18975 | [2515685 chr2 | 2 | 297104    | 298925    | 1822   | 7   | 0.346363  | 0.0581   | 296699    | 297510    | 298661    | 299185   |
| 55 NA18975 | [2515685 chr2 | 2 | 752473    | 755403    | 2931   | 3   | 0.394429  | 0.075756 | 751944    | 753002    | 754721    | 756085   |
| 56 NA18975 | [2515685 chr2 | 2 | 1429745   | 1432691   | 2947   | 2   | 0.52368   | 0.085101 | 1428787   | 1430704   | 1432147   | 1433235  |
| 57 NA18975 | [2515685 chr2 | 2 | 34606444  | 34644765  | 38322  | 39  | 0.808661  | 0.024803 | 34601818  | 34609397  | 34641812  | 3464839  |
| 58 NA18975 | [2515685 chr2 | 2 | 35896477  | 35905932  | 9456   | 3   | -0.948841 | 0.087219 | 35879425  | 35899430  | 35902979  | 3590982  |
| 59 NA18975 | [2515685 chr2 | 2 | 36245925  | 36253909  | 7985   | 4   | -0.92516  | 0.08442  | 36243469  | 36248382  | 36250956  | 36257555 |
| 60 NA18975 | [2515685 chr2 | 2 | 37869648  | 37911473  | 41826  | 43  | -0.491264 | 0.022182 | 37869077  | 37870220  | 37911214  | 3791173  |
| 61 NA18975 | [2515685 chr2 | 2 | 44378695  | 44380701  | 2007   | 3   | -0.817426 | 0.079007 | 44378636  | 44378754  | 44379703  | 4438169  |
| 62 NA18975 | [2515685 chr2 | 2 | 52661573  | 52696869  | 35297  | 26  | -3.797522 | 0.061278 | 52661218  | 52661928  | 52696416  | 5269732  |
| 63 NA18975 | [2515685 chr2 | 2 | 73921778  | 73948487  | 26710  | 43  | 0.320225  | 0.015092 | 73921335  | 73922222  | 73948060  | 7394891  |
| 64 NA18975 | [2515685 chr2 | 2 | 87752025  | 87753739  | 1715   | 2   | -0.497186 | 0.095612 | 87751415  | 87752636  | 87752678  | 8775480  |
| 65 NA18975 | [2515685 chr2 | 2 | 87963983  | 88098957  | 134975 | 14  | 0.311455  | 0.040276 | 87963455  | 87964512  | 88097049  | 8810086  |
| 66 NA18975 | [2515685 chr2 | 2 | 97184386  | 97189735  | 5350   | 2   | -0.810089 | 0.107216 | 97182781  | 97185992  | 97186782  | 9719672  |
| 67 NA18975 | [2515685 chr2 | 2 | 97281294  | 97297647  | 16354  | 26  | -0.331733 | 0.027709 | 97281091  | 97281497  | 97297385  | 9729791  |
| 68 NA18975 | [2515685 chr2 | 2 | 97613796  | 97614932  | 1137   | 2   | 1.62048   | 0.131831 | 97613553  | 97614040  | 97614467  | 9761539  |
| 69 NA18975 | [2515685 chr2 | 2 | 107475477 | 107477568 | 2092   | 2   | -0.963664 | 0.121808 | 107474333 | 107476621 | 107477239 | 10747789 |
| 70 NA18975 | [2515685 chr2 | 2 | 108313968 | 108314875 | 908    | 2   | 0.762017  | 0.106864 | 108313664 | 108314272 | 108314680 | 10831507 |
| 71 NA18975 | [2515685 chr2 | 2 | 110045666 | 110088603 | 42938  | 47  | -0.697491 | 0.020846 | 110045166 | 110046166 | 110088459 | 11008874 |
| 72 NA18975 | [2515685 chr2 | 2 | 110088959 | 110090456 | 1498   | 4   | -0.366444 | 0.066535 | 110088748 | 110089170 | 110090289 | 11009062 |
| 73 NA18975 | [2515685 chr2 | 2 | 110342579 | 110345833 | 3255   | 2   | -0.926889 | 0.07242  | 110341047 | 110344111 | 110345575 | 11034609 |
| 74 NA18975 | [2515685 chr2 | 2 | 110590037 | 110632991 | 42955  | 39  | -0.713956 | 0.022469 | 110589893 | 110590182 | 110632491 | 11063349 |
| 75 NA18975 | [2515685 chr2 | 2 | 111809680 | 111811642 | 1963   | 2   | -0.497185 | 0.095612 | 111808620 | 111810741 | 111810783 | 11181250 |
| 76 NA18975 | [2515685 chr2 | 2 | 126159437 | 126168349 | 8913   | 3   | -3.500658 | 0.153917 | 126158494 | 126160381 | 126168048 | 12616865 |
| 77 NA18975 | [2515685 chr2 | 2 | 129895890 | 129898456 | 2567   | 3   | 0.511548  | 0.099472 | 129895716 | 129896065 | 129896016 | 12989889 |
| 78 NA18975 | [2515685 chr2 | 2 | 129932020 | 129933250 | 1231   | 2   | 0.466444  | 0.092696 | 129931755 | 129932285 | 129933058 | 12993344 |
| 79 NA18975 | [2515685 chr2 | 2 | 130410671 | 130483330 | 72660  | 80  | -0.27747  | 0.016091 | 130410236 | 130411106 | 130483142 | 13048351 |
| 80 NA18975 | [2515685 chr2 | 2 | 130494765 | 130502777 | 8013   | 13  | -0.258227 | 0.039747 | 130494246 | 130495284 | 130502508 | 13050304 |
| 81 NA18975 | [2515685 chr2 | 2 | 131765081 | 131782932 | 17852  | 28  | -0.323045 | 0.026624 | 131749458 | 131768034 | 131782590 | 13178327 |
| 82 NA18975 | [2515685 chr2 | 2 | 131947114 | 131953962 | 6849   | 10  | -0.410697 | 0.044859 | 131946771 | 131947457 | 131953571 | 13195435 |
| 83 NA18975 | [2515685 chr2 | 2 | 132226682 | 132340886 | 114205 | 142 | -0.269458 | 0.01203  | 132226445 | 132226920 | 132340628 | 13234114 |
| 84 NA18975 | [2515685 chr2 | 2 | 132846945 | 132868265 | 21321  | 12  | 0.299636  | 0.027241 | 132846760 | 132847131 | 132867906 | 13286862 |
| 85 NA18975 | [2515685 chr2 | 2 | 132873051 | 132880524 | 7474   | 10  | 0.299636  | 0.027241 | 132872791 | 132873312 | 132880298 | 13288075 |
| 86 NA18975 | [2515685 chr2 | 2 | 146694145 | 146710744 | 16600  | 17  | -2.919163 | 0.072667 | 146688620 | 146697098 | 146710557 | 14671093 |
| 87 NA18975 | [2515685 chr2 | 2 | 153622711 | 153625256 | 2546   | 3   | 0.939207  | 0.092039 | 153621175 | 153624247 | 153625088 | 15362542 |
| 88 NA18975 | [2515685 chr2 | 2 | 208176479 | 208184457 | 7979   | 6   | 0.874772  | 0.064655 | 208176093 | 208176865 | 208183930 | 20818498 |
| 89 NA18975 | [2515685 chr2 | 2 | 228717927 | 228730812 | 12886  | 3   | -0.400066 | 0.076219 | 228715615 | 228720239 | 228730139 | 22873148 |
| 90 NA18975 | [2515685 chr2 | 2 | 232512469 | 232537143 | 24675  | 6   | -0.263488 | 0.040654 | 232511142 | 232513796 | 232534243 | 23254004 |

|             |               |   |           |           |        |     |           |          |           |           |           |          |
|-------------|---------------|---|-----------|-----------|--------|-----|-----------|----------|-----------|-----------|-----------|----------|
| 91 NA18975  | [2515685 chr2 | 2 | 242664580 | 242668683 | 4104   | 10  | 2.012215  | 0.047465 | 242664284 | 242664877 | 242668532 | 24266883 |
| 92 NA18975  | [2515685 chr3 | 3 | 154904    | 157210    | 2307   | 2   | -0.643691 | 0.099885 | 154511    | 155297    | 156642    | 157775   |
| 93 NA18975  | [2515685 chr3 | 3 | 204650    | 209394    | 4745   | 4   | 0.795781  | 0.072368 | 202918    | 206383    | 209009    | 209775   |
| 94 NA18975  | [2515685 chr3 | 3 | 1757211   | 1765703   | 8493   | 2   | 0.870036  | 0.116159 | 1756096   | 1758327   | 1762058   | 179730   |
| 95 NA18975  | [2515685 chr3 | 3 | 29654594  | 29656066  | 1473   | 2   | -0.546202 | 0.099239 | 29654069  | 29655120  | 29655652  | 2965648  |
| 96 NA18975  | [2515685 chr3 | 3 | 42350188  | 42351717  | 1530   | 3   | 0.488923  | 0.082307 | 42349839  | 42350537  | 42351490  | 4235194  |
| 97 NA18975  | [2515685 chr3 | 3 | 50888459  | 50888513  | 55     | 2   | 1.10842   | 0.122095 | 50888445  | 50888474  | 50888495  | 5088853  |
| 98 NA18975  | [2515685 chr3 | 3 | 68821474  | 68830847  | 9374   | 17  | -2.488702 | 0.058811 | 68818894  | 68824055  | 68830417  | 6883127  |
| 99 NA18975  | [2515685 chr3 | 3 | 75847165  | 75879750  | 32586  | 20  | -0.418586 | 0.030501 | 75845474  | 75848856  | 75876105  | 7589177  |
| 100 NA18975 | [2515685 chr3 | 3 | 106127289 | 106128660 | 1372   | 2   | -0.857562 | 0.094366 | 106126821 | 106127758 | 106128182 | 10612913 |
| 101 NA18975 | [2515685 chr3 | 3 | 127155218 | 127158873 | 3656   | 6   | -0.499691 | 0.059087 | 127155047 | 127155390 | 127158237 | 12715950 |
| 102 NA18975 | [2515685 chr3 | 3 | 131270140 | 131276431 | 6292   | 3   | 0.510901  | 0.096574 | 131269235 | 131271046 | 131272786 | 13128032 |
| 103 NA18975 | [2515685 chr3 | 3 | 139287057 | 139289507 | 2451   | 3   | 0.655138  | 0.101417 | 139286041 | 139288073 | 139289200 | 13928981 |
| 104 NA18975 | [2515685 chr3 | 3 | 156042614 | 156043843 | 1230   | 2   | -0.606956 | 0.106099 | 156042074 | 156043154 | 156043483 | 15604420 |
| 105 NA18975 | [2515685 chr3 | 3 | 163994592 | 164008330 | 13739  | 18  | 2.418131  | 0.028669 | 163993392 | 163995793 | 164008010 | 16400865 |
| 106 NA18975 | [2515685 chr3 | 3 | 164031300 | 164106273 | 74974  | 72  | 2.418131  | 0.028669 | 164027655 | 164036948 | 164106029 | 16410651 |
| 107 NA18975 | [2515685 chr3 | 3 | 164200660 | 164205886 | 5227   | 5   | -3.510744 | 0.148455 | 164200187 | 164201133 | 164204674 | 16420709 |
| 108 NA18975 | [2515685 chr3 | 3 | 190846156 | 190852181 | 6026   | 4   | -1.013501 | 0.079181 | 190845504 | 190846809 | 190850598 | 19085376 |
| 109 NA18975 | [2515685 chr3 | 3 | 192547312 | 192554331 | 7020   | 10  | 0.924025  | 0.051629 | 192546950 | 192547674 | 192554127 | 19255453 |
| 110 NA18975 | [2515685 chr3 | 3 | 196679304 | 196713768 | 34465  | 36  | 0.565914  | 0.019666 | 196677636 | 196680972 | 196711768 | 19671576 |
| 111 NA18975 | [2515685 chr3 | 3 | 196876438 | 196966359 | 89922  | 102 | -0.357532 | 0.014377 | 196875530 | 196877347 | 196966111 | 19696660 |
| 112 NA18975 | [2515685 chr3 | 3 | 196994475 | 197002965 | 8491   | 10  | 0.510656  | 0.044974 | 196994054 | 196994896 | 197002044 | 19700388 |
| 113 NA18975 | [2515685 chr3 | 3 | 197691083 | 197694225 | 3143   | 4   | -0.921941 | 0.085064 | 197690629 | 197691538 | 197693350 | 19769510 |
| 114 NA18975 | [2515685 chr3 | 3 | 198422794 | 198427408 | 4615   | 2   | 0.970792  | 0.123223 | 198422381 | 198423207 | 198423959 | 19843085 |
| 115 NA18975 | [2515685 chr3 | 3 | 198732649 | 198734602 | 1954   | 7   | 0.29544   | 0.050997 | 198732264 | 198733035 | 198734310 | 19873489 |
| 116 NA18975 | [2515685 chr3 | 3 | 199313925 | 199321063 | 7139   | 15  | -1.20018  | 0.029894 | 199313515 | 199314336 | 199320844 | 19932128 |
| 117 NA18975 | [2515685 chr4 | 4 | 8740317   | 8756949   | 16633  | 25  | 0.92378   | 0.020695 | 8740049   | 8740586   | 8756813   | 875708   |
| 118 NA18975 | [2515685 chr4 | 4 | 8998175   | 9046719   | 48545  | 87  | 0.384374  | 0.010636 | 8850774   | 9001243   | 9046129   | 904730   |
| 119 NA18975 | [2515685 chr4 | 4 | 9299467   | 9308037   | 8571   | 6   | -0.523921 | 0.066176 | 9295439   | 9302535   | 9306599   | 930947   |
| 120 NA18975 | [2515685 chr4 | 4 | 9812346   | 9813108   | 763    | 33  | 1.117206  | 0.020744 | 9812284   | 9812408   | 9812952   | 981326   |
| 121 NA18975 | [2515685 chr4 | 4 | 21045633  | 21053532  | 7900   | 8   | -0.916738 | 0.057119 | 21045231  | 21046035  | 21053115  | 2105395  |
| 122 NA18975 | [2515685 chr4 | 4 | 26130599  | 26138789  | 8191   | 7   | -0.823737 | 0.05782  | 26130148  | 26131051  | 26138353  | 26139221 |
| 123 NA18975 | [2515685 chr4 | 4 | 49121744  | 49174406  | 52663  | 191 | 0.338519  | 0.008618 | 49121741  | 49121747  | 49174404  | 4917440  |
| 124 NA18975 | [2515685 chr4 | 4 | 49353231  | 49361409  | 8179   | 14  | 0.386246  | 0.03208  | 49352892  | 49353570  | 49359431  | 4936338  |
| 125 NA18975 | [2515685 chr4 | 4 | 63500372  | 63504889  | 4518   | 5   | -4.504071 | 0.174429 | 63494261  | 63503440  | 63504639  | 6350514  |
| 126 NA18975 | [2515685 chr4 | 4 | 64522941  | 64543857  | 20917  | 20  | -0.856589 | 0.036904 | 64522682  | 64523201  | 64542552  | 6454516  |
| 127 NA18975 | [2515685 chr4 | 4 | 70305618  | 70417223  | 111606 | 112 | 0.419035  | 0.014118 | 70305512  | 70305724  | 70416364  | 7041808  |
| 128 NA18975 | [2515685 chr4 | 4 | 115534208 | 115541546 | 7339   | 9   | -3.618128 | 0.110055 | 115530015 | 115537276 | 115539984 | 11554310 |
| 129 NA18975 | [2515685 chr4 | 4 | 115865203 | 115869483 | 4281   | 3   | -3.57832  | 0.191461 | 115864913 | 115865494 | 115866415 | 11587556 |
| 130 NA18975 | [2515685 chr4 | 4 | 119480818 | 119487782 | 6965   | 5   | -0.923656 | 0.067124 | 119473487 | 119483886 | 119487418 | 11948814 |
| 131 NA18975 | [2515685 chr4 | 4 | 125304905 | 125306512 | 1608   | 3   | 0.486971  | 0.086462 | 125304587 | 125305223 | 125306235 | 12530678 |
| 132 NA18975 | [2515685 chr4 | 4 | 133536190 | 133540723 | 4534   | 3   | -3.36228  | 0.191121 | 133531398 | 133539258 | 133540462 | 13354098 |
| 133 NA18975 | [2515685 chr4 | 4 | 138537751 | 138549906 | 12156  | 14  | 0.91494   | 0.04437  | 138537443 | 138538059 | 138547414 | 13855239 |
| 134 NA18975 | [2515685 chr4 | 4 | 145240980 | 145245588 | 4609   | 4   | -0.702794 | 0.081826 | 145240473 | 145241488 | 145245192 | 14524598 |
| 135 NA18975 | [2515685 chr4 | 4 | 161371184 | 161377067 | 5884   | 10  | -0.960954 | 0.052297 | 161370737 | 161371632 | 161376564 | 16137757 |
| 136 NA18975 | [2515685 chr4 | 4 | 162237272 | 162242562 | 5291   | 8   | -4.277702 | 0.127645 | 162236487 | 162238058 | 162242381 | 16224274 |
| 137 NA18975 | [2515685 chr4 | 4 | 169184442 | 169368370 | 183929 | 161 | 0.823112  | 0.012217 | 169184090 | 169184794 | 169366713 | 16937002 |
| 138 NA18975 | [2515685 chr4 | 4 | 172750241 | 172755216 | 4976   | 2   | -4.059835 | 0.32132  | 172748887 | 172751596 | 172753256 | 17275717 |
| 139 NA18975 | [2515685 chr4 | 4 | 173799832 | 173807323 | 7492   | 6   | -3.424457 | 0.138923 | 173799464 | 173800201 | 173804255 | 17381134 |
| 140 NA18975 | [2515685 chr4 | 4 | 183944886 | 183947025 | 2140   | 3   | -1.03594  | 0.085146 | 183944291 | 183945482 | 183946755 | 18394729 |
| 141 NA18975 | [2515685 chr4 | 4 | 185533276 | 185544849 | 11574  | 12  | 0.840482  | 0.046061 | 185532696 | 185533857 | 185543276 | 18554642 |
| 142 NA18975 | [2515685 chr4 | 4 | 186816666 | 186818678 | 2013   | 3   | 4.860027  | 0.23934  | 186816420 | 186816912 | 186818307 | 18681904 |
| 143 NA18975 | [2515685 chr4 | 4 | 187728494 | 187732907 | 4414   | 15  | 2.172912  | 0.055148 | 187728193 | 187728795 | 187732541 | 18773327 |
| 144 NA18975 | [2515685 chr4 | 4 | 188255523 | 188269680 | 14158  | 235 | 0.932368  | 0.009384 | 188255215 | 188255831 | 188269403 | 18826995 |
| 145 NA18975 | [2515685 chr4 | 4 | 189799455 | 189807562 | 8108   | 11  | -0.391066 | 0.042775 | 189799180 | 189799730 | 189807064 | 18980806 |

|             |               |   |           |           |        |     |           |          |           |           |           |          |
|-------------|---------------|---|-----------|-----------|--------|-----|-----------|----------|-----------|-----------|-----------|----------|
| 146 NA18975 | [2515685 chr4 | 4 | 190528602 | 190533163 | 4562   | 21  | -2.285264 | 0.046345 | 190528058 | 190529146 | 190531664 | 19053466 |
| 147 NA18975 | [2515685 chr4 | 4 | 190845771 | 191049793 | 204023 | 209 | 0.315949  | 0.009859 | 190845056 | 190846486 | 191048338 | 19105124 |
| 148 NA18975 | [2515685 chr5 | 5 | 153687    | 155672    | 1986   | 3   | 0.449536  | 0.079203 | 153444    | 153930    | 155274    | 156071   |
| 149 NA18975 | [2515685 chr5 | 5 | 520743    | 521684    | 942    | 5   | 0.806379  | 0.078581 | 520428    | 521059    | 521427    | 521942   |
| 150 NA18975 | [2515685 chr5 | 5 | 743980    | 901723    | 157744 | 142 | -0.263964 | 0.011548 | 743336    | 744625    | 901319    | 902127   |
| 151 NA18975 | [2515685 chr5 | 5 | 1122995   | 1126517   | 3523   | 38  | 0.493901  | 0.017602 | 1122772   | 1123219   | 1126389   | 112664   |
| 152 NA18975 | [2515685 chr5 | 5 | 1133803   | 1135384   | 1582   | 2   | 0.664047  | 0.115645 | 1133552   | 1134055   | 1135081   | 113568   |
| 153 NA18975 | [2515685 chr5 | 5 | 12863961  | 12873512  | 9552   | 14  | -0.823959 | 0.044029 | 12863778  | 12864144  | 12873198  | 1287382  |
| 154 NA18975 | [2515685 chr5 | 5 | 17549317  | 17667407  | 118091 | 389 | -0.439864 | 0.005796 | 17548989  | 17549646  | 17667174  | 1766764  |
| 155 NA18975 | [2515685 chr5 | 5 | 17745629  | 17750443  | 4815   | 2   | 1.354825  | 0.113431 | 17745478  | 17745780  | 17748817  | 1775207  |
| 156 NA18975 | [2515685 chr5 | 5 | 26829433  | 26837938  | 8506   | 7   | 0.746897  | 0.063182 | 26829009  | 26829858  | 26837469  | 2683840  |
| 157 NA18975 | [2515685 chr5 | 5 | 32295710  | 32297985  | 2276   | 2   | -0.93002  | 0.112664 | 32295082  | 32296338  | 32296746  | 3229922  |
| 158 NA18975 | [2515685 chr5 | 5 | 61632767  | 61636719  | 3953   | 3   | 0.451402  | 0.088648 | 61631935  | 61633599  | 61636189  | 6163725  |
| 159 NA18975 | [2515685 chr5 | 5 | 68865200  | 68886836  | 21637  | 44  | 0.428654  | 0.022714 | 68864770  | 68865630  | 68886492  | 6888718  |
| 160 NA18975 | [2515685 chr5 | 5 | 69269791  | 69511519  | 241729 | 387 | 0.270263  | 0.005791 | 69269490  | 69270092  | 69511216  | 6951182  |
| 161 NA18975 | [2515685 chr5 | 5 | 70233016  | 70290650  | 57635  | 54  | 0.44581   | 0.015423 | 70232663  | 70233369  | 70287456  | 7029491  |
| 162 NA18975 | [2515685 chr5 | 5 | 70306148  | 70309397  | 3250   | 5   | 0.409626  | 0.053817 | 70305977  | 70306320  | 70308614  | 7031018  |
| 163 NA18975 | [2515685 chr5 | 5 | 70403953  | 70426554  | 22602  | 42  | 0.462825  | 0.023216 | 70403337  | 70404569  | 70425419  | 7042768  |
| 164 NA18975 | [2515685 chr5 | 5 | 70462481  | 70511908  | 49428  | 99  | 0.257835  | 0.011538 | 70462385  | 70462578  | 70511607  | 7051221  |
| 165 NA18975 | [2515685 chr5 | 5 | 81459211  | 81466057  | 6847   | 2   | -1.485151 | 0.123616 | 81455614  | 81462405  | 81462863  | 8147028  |
| 166 NA18975 | [2515685 chr5 | 5 | 93928460  | 93933101  | 4642   | 4   | -0.564839 | 0.082028 | 93927706  | 93929215  | 93931984  | 9393421  |
| 167 NA18975 | [2515685 chr5 | 5 | 99409393  | 99419037  | 9645   | 13  | -0.749853 | 0.042947 | 99408997  | 99409789  | 99418328  | 9941974  |
| 168 NA18975 | [2515685 chr5 | 5 | 122649189 | 122651412 | 2224   | 3   | 0.489176  | 0.087967 | 122648933 | 122649446 | 122650032 | 12265279 |
| 169 NA18975 | [2515685 chr5 | 5 | 137835178 | 137844134 | 8957   | 8   | 0.629266  | 0.056362 | 137834745 | 137835611 | 137843310 | 13784495 |
| 170 NA18975 | [2515685 chr5 | 5 | 140203081 | 140218928 | 15848  | 20  | 2.414082  | 0.056069 | 140202344 | 140203819 | 140218508 | 14021934 |
| 171 NA18975 | [2515685 chr5 | 5 | 140534849 | 140541507 | 6659   | 6   | 0.45372   | 0.060999 | 140534700 | 140534999 | 140541206 | 14054180 |
| 172 NA18975 | [2515685 chr5 | 5 | 179661369 | 179664720 | 3352   | 4   | 0.385548  | 0.074473 | 179661195 | 179661544 | 179664447 | 17966499 |
| 173 NA18975 | [2515685 chr6 | 6 | 3163      | 11430     | 8268   | 3   | 0.464072  | 0.081215 | 1         | 6325      | 7928      | 15669    |
| 174 NA18975 | [2515685 chr6 | 6 | 201823    | 327656    | 125834 | 129 | 0.39486   | 0.012736 | 201415    | 202232    | 326993    | 328320   |
| 175 NA18975 | [2515685 chr6 | 6 | 26860417  | 26861511  | 1095   | 2   | -0.797618 | 0.102775 | 26860088  | 26860746  | 26861212  | 2686181  |
| 176 NA18975 | [2515685 chr6 | 6 | 29958572  | 30017868  | 59297  | 55  | 0.477649  | 0.02052  | 29957670  | 29959474  | 30017587  | 3001814  |
| 177 NA18975 | [2515685 chr6 | 6 | 31316192  | 31317836  | 1645   | 2   | 0.668259  | 0.117531 | 31315812  | 31316572  | 31317476  | 3131819  |
| 178 NA18975 | [2515685 chr6 | 6 | 32059701  | 32121527  | 61827  | 74  | 0.341763  | 0.014143 | 32059402  | 32060000  | 32121053  | 3212200  |
| 179 NA18975 | [2515685 chr6 | 6 | 32590831  | 32591649  | 819    | 2   | -0.818993 | 0.107524 | 32590576  | 32591086  | 32591403  | 3259189  |
| 180 NA18975 | [2515685 chr6 | 6 | 32629616  | 32705737  | 76122  | 78  | 0.2776    | 0.013461 | 32629400  | 32629833  | 32704019  | 3270745  |
| 181 NA18975 | [2515685 chr6 | 6 | 32711954  | 32763261  | 51308  | 49  | 0.2776    | 0.013461 | 32711715  | 32712193  | 32763101  | 3276342  |
| 182 NA18975 | [2515685 chr6 | 6 | 32775535  | 32777812  | 2278   | 3   | -0.593196 | 0.098136 | 32775260  | 32775810  | 32777125  | 3277849  |
| 183 NA18975 | [2515685 chr6 | 6 | 32802179  | 32804370  | 2192   | 2   | 0.63511   | 0.116142 | 32802021  | 32802337  | 32802724  | 3280601  |
| 184 NA18975 | [2515685 chr6 | 6 | 66455162  | 66461833  | 6672   | 5   | -0.873564 | 0.075898 | 66454046  | 66456278  | 66461410  | 6646225  |
| 185 NA18975 | [2515685 chr6 | 6 | 77495034  | 77513513  | 18480  | 12  | 0.770812  | 0.047103 | 77493568  | 77496500  | 77510011  | 7751769  |
| 186 NA18975 | [2515685 chr6 | 6 | 78326767  | 78328478  | 1712   | 2   | -0.748862 | 0.100871 | 78325974  | 78327560  | 78328067  | 7832888  |
| 187 NA18975 | [2515685 chr6 | 6 | 79023318  | 79093263  | 69946  | 70  | 0.826564  | 0.018624 | 79022028  | 79024609  | 79091909  | 7909461  |
| 188 NA18975 | [2515685 chr6 | 6 | 160056728 | 160058998 | 2271   | 2   | -0.797277 | 0.085249 | 160055808 | 160057648 | 160058322 | 16005967 |
| 189 NA18975 | [2515685 chr6 | 6 | 160690579 | 160701695 | 11117  | 7   | 0.287947  | 0.055292 | 160689749 | 160691409 | 160698193 | 16070587 |
| 190 NA18975 | [2515685 chr6 | 6 | 161001907 | 161038819 | 36913  | 63  | 0.482462  | 0.012753 | 161001167 | 161002648 | 161038605 | 16103903 |
| 191 NA18975 | [2515685 chr6 | 6 | 167775161 | 167777997 | 2837   | 3   | 0.821463  | 0.094603 | 167774259 | 167776063 | 167777289 | 16777870 |
| 192 NA18975 | [2515685 chr6 | 6 | 168453011 | 168456762 | 3752   | 3   | 0.690129  | 0.083543 | 168452611 | 168453411 | 168456200 | 16845732 |
| 193 NA18975 | [2515685 chr6 | 6 | 170603879 | 170604666 | 788    | 2   | -0.508473 | 0.100259 | 170603541 | 170604217 | 170604339 | 17060499 |
| 194 NA18975 | [2515685 chr6 | 6 | 170720829 | 170723478 | 2650   | 11  | -0.33025  | 0.046933 | 170720441 | 170721218 | 170723334 | 17072362 |
| 195 NA18975 | [2515685 chr7 | 7 | 113212    | 116416    | 3205   | 14  | -0.365908 | 0.04281  | 113146    | 113279    | 116290    | 116543   |
| 196 NA18975 | [2515685 chr7 | 7 | 246731    | 254518    | 7788   | 10  | -3.296046 | 0.091568 | 246346    | 247117    | 254199    | 254838   |
| 197 NA18975 | [2515685 chr7 | 7 | 928371    | 930663    | 2293   | 6   | 0.426274  | 0.058339 | 928117    | 928626    | 930382    | 930945   |
| 198 NA18975 | [2515685 chr7 | 7 | 1084125   | 1086660   | 2536   | 15  | 0.389084  | 0.03669  | 1083752   | 1084499   | 1085871   | 1087445  |
| 199 NA18975 | [2515685 chr7 | 7 | 3384111   | 3392459   | 8349   | 8   | 0.861579  | 0.056555 | 3383451   | 3384772   | 3390107   | 339561   |
| 200 NA18975 | [2515685 chr7 | 7 | 12297894  | 12298675  | 782    | 5   | 0.443357  | 0.070996 | 12297829  | 12297960  | 12298540  | 1229881  |

|             |               |   |           |           |        |      |                    |           |           |           |          |
|-------------|---------------|---|-----------|-----------|--------|------|--------------------|-----------|-----------|-----------|----------|
| 201 NA18975 | [2515685 chr7 | 7 | 37647977  | 37657851  | 9875   | 2    | -0.653254 0.075394 | 37646226  | 37649728  | 37655499  | 37719607 |
| 202 NA18975 | [2515685 chr7 | 7 | 56415681  | 56544240  | 128560 | 4    | -0.696614 0.072383 | 56286086  | 56418033  | 56542365  | 56546111 |
| 203 NA18975 | [2515685 chr7 | 7 | 57512425  | 57519686  | 7262   | 10   | -0.258853 0.047887 | 57512005  | 57512846  | 57518760  | 57520617 |
| 204 NA18975 | [2515685 chr7 | 7 | 64028465  | 64045487  | 17023  | 47   | -0.464782 0.020373 | 64027806  | 64029125  | 64045069  | 64045901 |
| 205 NA18975 | [2515685 chr7 | 7 | 64464087  | 64556662  | 92576  | 167  | -0.250462 0.01073  | 64463669  | 64464506  | 64556244  | 64557081 |
| 206 NA18975 | [2515685 chr7 | 7 | 71487853  | 71491635  | 3783   | 2    | -0.510907 0.09464  | 71487606  | 71488100  | 71489994  | 71493277 |
| 207 NA18975 | [2515685 chr7 | 7 | 72013365  | 72014871  | 1507   | 6    | 0.279035 0.048218  | 72013067  | 72013664  | 72014598  | 72015144 |
| 208 NA18975 | [2515685 chr7 | 7 | 73698894  | 73700080  | 1187   | 3    | 0.419256 0.080946  | 73698686  | 73699103  | 73699523  | 73700637 |
| 209 NA18975 | [2515685 chr7 | 7 | 73823616  | 73824682  | 1067   | 5    | 0.32147 0.062982   | 73823477  | 73823755  | 73824463  | 73824907 |
| 210 NA18975 | [2515685 chr7 | 7 | 73916725  | 73918196  | 1472   | 3    | 0.38913 0.073785   | 73916422  | 73917029  | 73917270  | 73919127 |
| 211 NA18975 | [2515685 chr7 | 7 | 73965656  | 73966691  | 1036   | 4    | 0.421054 0.068477  | 73965279  | 73966033  | 73966513  | 73966871 |
| 212 NA18975 | [2515685 chr7 | 7 | 74096901  | 74098405  | 1505   | 6    | 0.279035 0.048218  | 74096630  | 74097173  | 74098107  | 74098707 |
| 213 NA18975 | [2515685 chr7 | 7 | 74417518  | 74418989  | 1472   | 3    | 0.38913 0.073785   | 74416593  | 74418444  | 74418686  | 74419279 |
| 214 NA18975 | [2515685 chr7 | 7 | 74510928  | 74512592  | 1665   | 7    | 0.276231 0.046208  | 74510847  | 74511009  | 74512294  | 74512897 |
| 215 NA18975 | [2515685 chr7 | 7 | 75790452  | 75794984  | 4533   | 5    | -0.739191 0.070107 | 75790248  | 75790656  | 75794325  | 75795647 |
| 216 NA18975 | [2515685 chr7 | 7 | 76448511  | 76450306  | 1796   | 3    | -0.505864 0.081217 | 76447899  | 76449124  | 76449920  | 76450697 |
| 217 NA18975 | [2515685 chr7 | 7 | 86392789  | 86394206  | 1418   | 2    | 0.818996 0.119515  | 86392392  | 86393187  | 86393827  | 86394581 |
| 218 NA18975 | [2515685 chr7 | 7 | 92971481  | 92976895  | 5415   | 4    | 0.764174 0.086044  | 92971060  | 92971903  | 92975569  | 92978227 |
| 219 NA18975 | [2515685 chr7 | 7 | 109034782 | 109048749 | 13968  | 10   | 2.589263 0.077568  | 109024063 | 109037134 | 109046953 | 10905054 |
| 220 NA18975 | [2515685 chr7 | 7 | 125639507 | 125644775 | 5269   | 6    | -0.746829 0.071158 | 125639054 | 125639961 | 125644046 | 12564550 |
| 221 NA18975 | [2515685 chr7 | 7 | 126108382 | 126126371 | 17990  | 27   | -0.360861 0.026697 | 126107861 | 126108904 | 126125619 | 12612712 |
| 222 NA18975 | [2515685 chr7 | 7 | 133243981 | 133257361 | 13381  | 14   | 3.096443 0.076194  | 133243755 | 133244207 | 133255009 | 13326093 |
| 223 NA18975 | [2515685 chr7 | 7 | 141962017 | 141983067 | 21051  | 27   | -0.80823 0.030931  | 141961693 | 141962342 | 141982817 | 14198331 |
| 224 NA18975 | [2515685 chr7 | 7 | 141985998 | 141993247 | 7250   | 7    | -0.43789 0.05501   | 141985708 | 141986289 | 141992651 | 14199384 |
| 225 NA18975 | [2515685 chr7 | 7 | 142818909 | 142828015 | 9107   | 15   | 0.339995 0.037993  | 142818362 | 142819456 | 142827707 | 14282832 |
| 226 NA18975 | [2515685 chr7 | 7 | 143320629 | 143401988 | 81360  | 146  | -0.433322 0.007218 | 143320373 | 143320886 | 143401347 | 14340262 |
| 227 NA18975 | [2515685 chr7 | 7 | 143407062 | 143511719 | 104658 | 211  | -0.433322 0.007218 | 143406604 | 143407520 | 143511270 | 14351216 |
| 228 NA18975 | [2515685 chr7 | 7 | 149285428 | 149286281 | 854    | 2    | -0.763199 0.093307 | 149285181 | 149285676 | 149286217 | 14928634 |
| 229 NA18975 | [2515685 chr7 | 7 | 152950453 | 152951306 | 854    | 2    | -0.782069 0.092626 | 152950389 | 152950517 | 152951051 | 15295156 |
| 230 NA18975 | [2515685 chr7 | 7 | 156845401 | 156847050 | 1650   | 2    | -0.737974 0.103719 | 156845117 | 156845685 | 156846689 | 15684741 |
| 231 NA18975 | [2515685 chr7 | 7 | 156976112 | 156978464 | 2353   | 2    | -0.622105 0.102283 | 156975812 | 156976413 | 156977896 | 15697903 |
| 232 NA18975 | [2515685 chr7 | 7 | 157023614 | 157027930 | 4317   | 7    | 0.311517 0.05507   | 157023242 | 157023987 | 157027451 | 15702840 |
| 233 NA18975 | [2515685 chr7 | 7 | 158207288 | 158209880 | 2593   | 2    | 1.044836 0.12439   | 158206344 | 158208233 | 158209333 | 15821042 |
| 234 NA18975 | [2515685 chr7 | 7 | 158617060 | 158624380 | 7321   | 6    | 0.944938 0.067344  | 158616763 | 158617357 | 158622028 | 15862673 |
| 235 NA18975 | [2515685 chr8 | 8 | 1328256   | 1343509   | 15254  | 45   | -0.559273 0.019418 | 1327688   | 1328824   | 1342795   | 1344224  |
| 236 NA18975 | [2515685 chr8 | 8 | 1394513   | 1398803   | 4291   | 6    | -0.387838 0.063386 | 1393955   | 1395072   | 1398426   | 1399187  |
| 237 NA18975 | [2515685 chr8 | 8 | 2238734   | 2253793   | 15060  | 10   | 0.80759 0.051081   | 2233839   | 2241488   | 2251039   | 2257526  |
| 238 NA18975 | [2515685 chr8 | 8 | 3775376   | 3784630   | 9255   | 10   | -0.263354 0.045382 | 3775003   | 3775750   | 3784097   | 3785163  |
| 239 NA18975 | [2515685 chr8 | 8 | 4110204   | 4112526   | 2323   | 2    | 4.760469 0.253458  | 4109692   | 4110717   | 4112031   | 4113027  |
| 240 NA18975 | [2515685 chr8 | 8 | 5817892   | 5820042   | 2151   | 2    | -0.897198 0.13097  | 5817072   | 5818713   | 5819661   | 5820427  |
| 241 NA18975 | [2515685 chr8 | 8 | 6817073   | 6866193   | 49121  | 86   | -0.358441 0.012725 | 6816809   | 6817338   | 6866118   | 6866265  |
| 242 NA18975 | [2515685 chr8 | 8 | 7094852   | 7930292   | 835441 | 1668 | 0.254573 0.002984  | 7092427   | 7092728   | 7930155   | 7930425  |
| 243 NA18975 | [2515685 chr8 | 8 | 12006412  | 12006992  | 581    | 2    | 0.538842 0.089359  | 12006271  | 12006553  | 12006567  | 12007411 |
| 244 NA18975 | [2515685 chr8 | 8 | 12023134  | 12033723  | 10590  | 29   | 0.350338 0.027199  | 12022997  | 12023272  | 12033419  | 12034027 |
| 245 NA18975 | [2515685 chr8 | 8 | 12034819  | 12036797  | 1979   | 4    | -0.363665 0.070956 | 12034665  | 12034973  | 12036486  | 12037101 |
| 246 NA18975 | [2515685 chr8 | 8 | 12064826  | 12072445  | 7620   | 25   | 0.32443 0.023681   | 12064663  | 12064989  | 12072267  | 12072627 |
| 247 NA18975 | [2515685 chr8 | 8 | 12259618  | 12260238  | 621    | 2    | 0.538842 0.089359  | 12259477  | 12259759  | 12259773  | 12260707 |
| 248 NA18975 | [2515685 chr8 | 8 | 12273297  | 12287848  | 14552  | 21   | 0.399408 0.030546  | 12271117  | 12275477  | 12286511  | 12289187 |
| 249 NA18975 | [2515685 chr8 | 8 | 12314107  | 12321726  | 7620   | 22   | 0.312376 0.024697  | 12313944  | 12314270  | 12321548  | 12321907 |
| 250 NA18975 | [2515685 chr8 | 8 | 16246510  | 16251509  | 5000   | 4    | -4.288466 0.186248 | 16246275  | 16246745  | 16250812  | 16252207 |
| 251 NA18975 | [2515685 chr8 | 8 | 18900549  | 18901909  | 1361   | 2    | -0.684058 0.099675 | 18900138  | 18900960  | 18901577  | 18902247 |
| 252 NA18975 | [2515685 chr8 | 8 | 20022286  | 20024771  | 2486   | 2    | -0.857406 0.122294 | 20021082  | 20023491  | 20024338  | 20025207 |
| 253 NA18975 | [2515685 chr8 | 8 | 25466015  | 25471689  | 5675   | 4    | -0.872397 0.081249 | 25464392  | 25467638  | 25470702  | 25472671 |
| 254 NA18975 | [2515685 chr8 | 8 | 49081430  | 49084499  | 3070   | 2    | -0.603911 0.10869  | 49079497  | 49083364  | 49084089  | 49084911 |
| 255 NA18975 | [2515685 chr8 | 8 | 51193670  | 51201152  | 7483   | 11   | -0.954097 0.04987  | 51193335  | 51194005  | 51200867  | 51201431 |

|             |                |    |           |           |        |     |           |          |           |           |           |           |
|-------------|----------------|----|-----------|-----------|--------|-----|-----------|----------|-----------|-----------|-----------|-----------|
| 256 NA18975 | [2515685 chr8  | 8  | 51969408  | 51971838  | 2431   | 5   | -0.472121 | 0.072664 | 51969071  | 51969745  | 51971671  | 5197200!  |
| 257 NA18975 | [2515685 chr8  | 8  | 58278355  | 58289214  | 10860  | 9   | 0.458834  | 0.038866 | 58277116  | 58279595  | 58288084  | 5829034!  |
| 258 NA18975 | [2515685 chr8  | 8  | 85423649  | 85431920  | 8272   | 7   | 0.957712  | 0.058078 | 85423043  | 85424256  | 85431347  | 8543249:  |
| 259 NA18975 | [2515685 chr8  | 8  | 86742169  | 86910255  | 168087 | 105 | 0.277496  | 0.010477 | 86741757  | 86742581  | 86910002  | 8691050!  |
| 260 NA18975 | [2515685 chr8  | 8  | 115702151 | 115715317 | 13167  | 12  | -0.779042 | 0.046198 | 115701237 | 115703065 | 115702563 | 11571874  |
| 261 NA18975 | [2515685 chr8  | 8  | 120222660 | 120229952 | 7293   | 6   | 0.795713  | 0.063584 | 120218251 | 120225414 | 120229434 | 12023047! |
| 262 NA18975 | [2515685 chr8  | 8  | 135128391 | 135137626 | 9236   | 13  | -0.875678 | 0.044005 | 135127707 | 135129076 | 135137252 | 13513800  |
| 263 NA18975 | [2515685 chr9  | 9  | 310045    | 312573    | 2529   | 61  | 0.410124  | 0.016619 | 309952    | 310139    | 312407    | 31274C    |
| 264 NA18975 | [2515685 chr9  | 9  | 12673287  | 12676879  | 3593   | 3   | 0.416267  | 0.081309 | 12671187  | 12675387  | 12676588  | 1267717   |
| 265 NA18975 | [2515685 chr9  | 9  | 33646675  | 33648954  | 2280   | 3   | -0.535567 | 0.08711  | 33646355  | 33646996  | 33648420  | 3364948!  |
| 266 NA18975 | [2515685 chr9  | 9  | 33789424  | 33793351  | 3928   | 6   | -0.48023  | 0.062173 | 33789218  | 33789631  | 33793129  | 3379357:  |
| 267 NA18975 | [2515685 chr9  | 9  | 38763857  | 38952823  | 188967 | 331 | -0.260241 | 0.00786  | 38761896  | 38765818  | 38952514  | 3895313:  |
| 268 NA18975 | [2515685 chr9  | 9  | 38973401  | 38974176  | 776    | 2   | 0.587912  | 0.098688 | 38973122  | 38973680  | 38974034  | 3897431!  |
| 269 NA18975 | [2515685 chr9  | 9  | 39811790  | 39822887  | 11098  | 18  | 0.3779    | 0.029921 | 39810439  | 39813141  | 39822472  | 3982330:  |
| 270 NA18975 | [2515685 chr9  | 9  | 39864986  | 39866101  | 1116   | 5   | 0.382877  | 0.048063 | 39864795  | 39865177  | 39866022  | 3986618   |
| 271 NA18975 | [2515685 chr9  | 9  | 41125241  | 41126024  | 784    | 3   | 0.537131  | 0.083494 | 41125099  | 41125384  | 41125754  | 4112629:  |
| 272 NA18975 | [2515685 chr9  | 9  | 41598793  | 41599908  | 1116   | 5   | 0.382877  | 0.048063 | 41598714  | 41598873  | 41599718  | 4160009!  |
| 273 NA18975 | [2515685 chr9  | 9  | 41642009  | 41653902  | 11894  | 17  | 0.370125  | 0.030443 | 41641595  | 41642423  | 41651748  | 4165605   |
| 274 NA18975 | [2515685 chr9  | 9  | 42070573  | 42080673  | 10101  | 16  | 0.421023  | 0.026485 | 42069073  | 42072074  | 42080516  | 4208083   |
| 275 NA18975 | [2515685 chr9  | 9  | 42121802  | 42122916  | 1115   | 5   | 0.382877  | 0.048063 | 42121612  | 42121992  | 42122837  | 4212299!  |
| 276 NA18975 | [2515685 chr9  | 9  | 42752844  | 42765281  | 12438  | 20  | 0.429772  | 0.022953 | 42751520  | 42754168  | 42765124  | 4276543!  |
| 277 NA18975 | [2515685 chr9  | 9  | 42873520  | 42885957  | 12438  | 20  | 0.429773  | 0.022953 | 42872196  | 42874844  | 42885800  | 4288611!  |
| 278 NA18975 | [2515685 chr9  | 9  | 43807800  | 43812530  | 4731   | 6   | 0.511467  | 0.062295 | 43807212  | 43808388  | 43812324  | 4381273!  |
| 279 NA18975 | [2515685 chr9  | 9  | 43960943  | 44063066  | 102124 | 20  | -0.292112 | 0.027516 | 43959984  | 43961903  | 44062717  | 4406341:  |
| 280 NA18975 | [2515685 chr9  | 9  | 65937679  | 65940789  | 3111   | 7   | 0.381205  | 0.050979 | 65937537  | 65937822  | 65939394  | 6594218:  |
| 281 NA18975 | [2515685 chr9  | 9  | 66297435  | 66340999  | 43565  | 52  | 0.259938  | 0.019368 | 66283602  | 66299797  | 66340327  | 6634167   |
| 282 NA18975 | [2515685 chr9  | 9  | 66822650  | 66833581  | 10932  | 12  | 0.312518  | 0.034011 | 66822089  | 66823212  | 66833436  | 6683372:  |
| 283 NA18975 | [2515685 chr9  | 9  | 89405187  | 89407924  | 2738   | 2   | -0.958228 | 0.10679  | 89404572  | 89405803  | 89407164  | 8940868!  |
| 284 NA18975 | [2515685 chr9  | 9  | 101795950 | 101804576 | 8627   | 7   | -1.058398 | 0.064162 | 101795517 | 101796383 | 101803113 | 10180603  |
| 285 NA18975 | [2515685 chr9  | 9  | 112899651 | 112932269 | 32619  | 45  | 0.256822  | 0.01572  | 112899170 | 112900132 | 112931621 | 11293291  |
| 286 NA18975 | [2515685 chr9  | 9  | 138188003 | 138189923 | 1921   | 45  | -0.327236 | 0.021668 | 138187808 | 138188198 | 138189840 | 13819000  |
| 287 NA18975 | [2515685 chr9  | 9  | 138397327 | 138399638 | 2312   | 12  | -0.345251 | 0.045474 | 138397201 | 138397454 | 138399572 | 13839970  |
| 288 NA18975 | [2515685 chr10 | 10 | 6693908   | 6704321   | 10414  | 8   | 0.736729  | 0.055205 | 6692231   | 6695585   | 6704008   | 6704634   |
| 289 NA18975 | [2515685 chr10 | 10 | 19788649  | 19790461  | 1813   | 2   | -0.60321  | 0.092255 | 19788411  | 19788887  | 19789952  | 1979097!  |
| 290 NA18975 | [2515685 chr10 | 10 | 42564252  | 42565662  | 1411   | 4   | -0.387802 | 0.073213 | 42563949  | 42564556  | 42565423  | 4256590   |
| 291 NA18975 | [2515685 chr10 | 10 | 42647712  | 42650729  | 3018   | 6   | 0.480658  | 0.06209  | 42647349  | 42648075  | 42650066  | 4265139:  |
| 292 NA18975 | [2515685 chr10 | 10 | 46113643  | 46129517  | 15875  | 27  | -0.361354 | 0.021506 | 46113432  | 46113854  | 46129280  | 4612975:  |
| 293 NA18975 | [2515685 chr10 | 10 | 46168755  | 46171356  | 2602   | 11  | -0.419168 | 0.038554 | 46168488  | 46169022  | 46171200  | 4617151:  |
| 294 NA18975 | [2515685 chr10 | 10 | 46185144  | 46675076  | 489933 | 891 | -0.335709 | 0.003274 | 46184361  | 46185928  | 46675054  | 4667509!  |
| 295 NA18975 | [2515685 chr10 | 10 | 46677788  | 47173707  | 495920 | 548 | -0.335709 | 0.003274 | 46677220  | 46678357  | 47173507  | 4717390!  |
| 296 NA18975 | [2515685 chr10 | 10 | 47220005  | 47220637  | 633    | 4   | -0.66527  | 0.074985 | 47219903  | 47220107  | 47220533  | 4722074   |
| 297 NA18975 | [2515685 chr10 | 10 | 47226505  | 47231502  | 4998   | 20  | -0.36916  | 0.02761  | 47226377  | 47226633  | 47231201  | 4723180:  |
| 298 NA18975 | [2515685 chr10 | 10 | 47723237  | 47803532  | 80296  | 220 | -0.32716  | 0.008207 | 47575187  | 47725982  | 47802824  | 4780424   |
| 299 NA18975 | [2515685 chr10 | 10 | 47878398  | 47878897  | 500    | 2   | -0.693307 | 0.103105 | 47878220  | 47878577  | 47878725  | 4787907!  |
| 300 NA18975 | [2515685 chr10 | 10 | 47884830  | 47889830  | 5001   | 20  | -0.37817  | 0.027129 | 47884702  | 47884958  | 47889529  | 4789013   |
| 301 NA18975 | [2515685 chr10 | 10 | 48499011  | 48516048  | 17038  | 27  | -0.358913 | 0.021514 | 48498672  | 48499351  | 48515812  | 4851628!  |
| 302 NA18975 | [2515685 chr10 | 10 | 48558524  | 48561054  | 2531   | 12  | -0.396099 | 0.03741  | 48558257  | 48558791  | 48560968  | 4856114   |
| 303 NA18975 | [2515685 chr10 | 10 | 48574881  | 48636798  | 61918  | 144 | -0.296301 | 0.00961  | 48574098  | 48575665  | 48636374  | 4863722:  |
| 304 NA18975 | [2515685 chr10 | 10 | 48638301  | 48718242  | 79942  | 130 | -0.388833 | 0.009571 | 48638050  | 48638553  | 48715497  | 4886556-  |
| 305 NA18975 | [2515685 chr10 | 10 | 51119630  | 51130526  | 10897  | 16  | -0.37716  | 0.029622 | 51119365  | 51119895  | 51130447  | 5113060!  |
| 306 NA18975 | [2515685 chr10 | 10 | 51157418  | 51161093  | 3676   | 6   | -0.496524 | 0.056962 | 51157207  | 51157629  | 51160825  | 5116136:  |
| 307 NA18975 | [2515685 chr10 | 10 | 52136987  | 52139263  | 2277   | 5   | -0.262713 | 0.048236 | 52136355  | 52137619  | 52139186  | 5213934!  |
| 308 NA18975 | [2515685 chr10 | 10 | 56117212  | 56139275  | 22064  | 20  | -1.005874 | 0.035091 | 56115764  | 56118661  | 56138931  | 5613961!  |
| 309 NA18975 | [2515685 chr10 | 10 | 58515338  | 58521341  | 6004   | 8   | -0.831946 | 0.05212  | 58514982  | 58515695  | 58521055  | 5852162!  |
| 310 NA18975 | [2515685 chr10 | 10 | 66977355  | 66985193  | 7839   | 8   | -0.970995 | 0.060352 | 66976803  | 66977908  | 66984894  | 6698549:  |



|             |                |    |           |           |       |     |           |          |           |           |           |          |
|-------------|----------------|----|-----------|-----------|-------|-----|-----------|----------|-----------|-----------|-----------|----------|
| 311 NA18975 | [2515685 chr10 | 10 | 70951158  | 70961194  | 10037 | 7   | -0.742266 | 0.059149 | 70949290  | 70953027  | 70960964  | 7096142! |
| 312 NA18975 | [2515685 chr10 | 10 | 81144645  | 81173619  | 28975 | 28  | -0.58     | 0.021011 | 81144276  | 81145014  | 81171386  | 8117585: |
| 313 NA18975 | [2515685 chr10 | 10 | 81464835  | 81493795  | 28961 | 26  | -0.568633 | 0.021677 | 81464464  | 81465206  | 81491562  | 8149602! |
| 314 NA18975 | [2515685 chr10 | 10 | 81663989  | 81669493  | 5505  | 8   | -0.283482 | 0.049655 | 81663740  | 81664238  | 81669128  | 8166985! |
| 315 NA18975 | [2515685 chr10 | 10 | 88867016  | 88966295  | 99280 | 110 | -0.297962 | 0.009206 | 88866816  | 88867217  | 88965910  | 8896668! |
| 316 NA18975 | [2515685 chr10 | 10 | 88985844  | 89016296  | 30453 | 41  | -0.297962 | 0.009206 | 88985192  | 88986497  | 89014572  | 8901802' |
| 317 NA18975 | [2515685 chr10 | 10 | 89142153  | 89179229  | 37077 | 58  | -0.29255  | 0.017255 | 89141923  | 89142383  | 89178871  | 8917958' |
| 318 NA18975 | [2515685 chr10 | 10 | 89221150  | 89249961  | 28812 | 34  | -0.488506 | 0.021799 | 89219426  | 89222875  | 89249436  | 8925048' |
| 319 NA18975 | [2515685 chr10 | 10 | 114102241 | 114106477 | 4237  | 5   | -4.636647 | 0.171302 | 114101694 | 114102788 | 114105867 | 11410708 |
| 320 NA18975 | [2515685 chr10 | 10 | 124336365 | 124341749 | 5385  | 6   | 0.553138  | 0.065579 | 124335581 | 124337149 | 124341238 | 12434226 |
| 321 NA18975 | [2515685 chr10 | 10 | 124349666 | 124366738 | 17073 | 22  | -0.769963 | 0.021978 | 124349302 | 124350031 | 124366300 | 12436717 |
| 322 NA18975 | [2515685 chr10 | 10 | 134168766 | 134170259 | 1494  | 17  | -0.354753 | 0.03813  | 134168524 | 134169008 | 134170097 | 13417042 |
| 323 NA18975 | [2515685 chr10 | 10 | 135367159 | 135389814 | 22656 | 19  | -0.341314 | 0.021545 | 135366656 | 135367663 | 135387500 | 13539212 |
| 324 NA18975 | [2515685 chr11 | 11 | 2840307   | 2841533   | 1227  | 2   | -1.066693 | 0.14567  | 2839959   | 2840656   | 2841211   | 284185!  |
| 325 NA18975 | [2515685 chr11 | 11 | 3628748   | 3632795   | 4048  | 6   | -2.324409 | 0.08539  | 3625722   | 3631775   | 3632594   | 363299!  |
| 326 NA18975 | [2515685 chr11 | 11 | 5717038   | 5722028   | 4991  | 3   | 2.768482  | 0.145605 | 5716660   | 5717416   | 5718945   | 572548!  |
| 327 NA18975 | [2515685 chr11 | 11 | 5741269   | 5765993   | 24725 | 33  | 2.967101  | 0.046223 | 5741059   | 5741480   | 5765632   | 576635!  |
| 328 NA18975 | [2515685 chr11 | 11 | 11780222  | 11782174  | 1953  | 2   | -0.864886 | 0.096651 | 11779958  | 11780486  | 11781057  | 1178329: |
| 329 NA18975 | [2515685 chr11 | 11 | 11831868  | 11833089  | 1222  | 2   | 1.085143  | 0.110897 | 11831412  | 11832324  | 11832853  | 1183332! |
| 330 NA18975 | [2515685 chr11 | 11 | 18903450  | 18919581  | 16132 | 29  | 0.471508  | 0.026851 | 18897800  | 18906533  | 18919224  | 1891993! |
| 331 NA18975 | [2515685 chr11 | 11 | 28965605  | 28969186  | 3582  | 5   | 4.613587  | 0.155996 | 28965284  | 28965927  | 28968702  | 2896967! |
| 332 NA18975 | [2515685 chr11 | 11 | 49665830  | 49715831  | 50002 | 36  | 0.50471   | 0.024223 | 49665251  | 49666410  | 49712748  | 4972198: |
| 333 NA18975 | [2515685 chr11 | 11 | 55348334  | 55350588  | 2255  | 3   | -0.43892  | 0.079277 | 55348047  | 55348621  | 55350206  | 5535097! |
| 334 NA18975 | [2515685 chr11 | 11 | 55432391  | 55434453  | 2063  | 2   | -0.704917 | 0.114315 | 55431954  | 55432829  | 55433918  | 5543498! |
| 335 NA18975 | [2515685 chr11 | 11 | 60721034  | 60777477  | 56444 | 74  | 0.738992  | 0.013888 | 60720112  | 60721956  | 60776810  | 6077814! |
| 336 NA18975 | [2515685 chr11 | 11 | 73812690  | 73818580  | 5891  | 4   | -0.441911 | 0.077092 | 73812400  | 73812981  | 73818213  | 7381894' |
| 337 NA18975 | [2515685 chr11 | 11 | 79657975  | 79662283  | 4309  | 3   | -0.527524 | 0.083214 | 79657791  | 79658159  | 79659200  | 7966807: |
| 338 NA18975 | [2515685 chr11 | 11 | 85981700  | 85984113  | 2414  | 3   | -0.89757  | 0.093871 | 85981147  | 85982254  | 85983791  | 8598443! |
| 339 NA18975 | [2515685 chr11 | 11 | 88266938  | 88303948  | 37011 | 40  | 0.258345  | 0.023135 | 88266424  | 88267453  | 88303762  | 8830413! |
| 340 NA18975 | [2515685 chr11 | 11 | 89184898  | 89188706  | 3809  | 4   | 0.422068  | 0.077856 | 89184243  | 89185554  | 89188235  | 8918917' |
| 341 NA18975 | [2515685 chr11 | 11 | 89260757  | 89266247  | 5491  | 9   | -0.606158 | 0.050385 | 89260437  | 89261077  | 89265993  | 8926650: |
| 342 NA18975 | [2515685 chr11 | 11 | 89323920  | 89328275  | 4356  | 9   | -0.652912 | 0.050932 | 89323666  | 89324175  | 89327950  | 8932860! |
| 343 NA18975 | [2515685 chr11 | 11 | 106744846 | 106751054 | 6209  | 9   | -0.842516 | 0.056603 | 106744561 | 106745131 | 10674971  | 10675483 |
| 344 NA18975 | [2515685 chr11 | 11 | 113977904 | 114010845 | 32942 | 47  | 0.271985  | 0.0208   | 113976911 | 113978897 | 114007762 | 11401698 |
| 345 NA18975 | [2515685 chr11 | 11 | 134107699 | 134112290 | 4592  | 5   | 0.832006  | 0.067395 | 134106591 | 134108808 | 134111845 | 13411273 |
| 346 NA18975 | [2515685 chr12 | 12 | 398598    | 404873    | 6276  | 14  | -0.306486 | 0.027045 | 398035    | 399161    | 401600    | 40814!   |
| 347 NA18975 | [2515685 chr12 | 12 | 736840    | 744802    | 7963  | 9   | 0.90343   | 0.051226 | 736616    | 737064    | 744211    | 74539!   |
| 348 NA18975 | [2515685 chr12 | 12 | 2112534   | 2127840   | 15307 | 16  | 0.68926   | 0.037692 | 2109107   | 2115961   | 2127279   | 212840:  |
| 349 NA18975 | [2515685 chr12 | 12 | 6113530   | 6117052   | 3523  | 3   | 0.683205  | 0.092583 | 6111640   | 6115421   | 6116289   | 611781!  |
| 350 NA18975 | [2515685 chr12 | 12 | 8259229   | 8270350   | 11122 | 23  | 0.319449  | 0.02607  | 8259044   | 8259414   | 8269654   | 827104!  |
| 351 NA18975 | [2515685 chr12 | 12 | 9439936   | 9445623   | 5688  | 9   | 0.302567  | 0.044129 | 9439574   | 9440298   | 9445247   | 944600!  |
| 352 NA18975 | [2515685 chr12 | 12 | 9527659   | 9624971   | 97313 | 105 | 0.684668  | 0.015663 | 9526872   | 9528447   | 9623223   | 962672!  |
| 353 NA18975 | [2515685 chr12 | 12 | 11109398  | 11142012  | 32615 | 40  | -0.360121 | 0.023048 | 11109206  | 11109590  | 11141608  | 1114241: |
| 354 NA18975 | [2515685 chr12 | 12 | 11398049  | 11436142  | 38094 | 34  | -0.441235 | 0.025329 | 11397507  | 11398591  | 11435669  | 1143661! |
| 355 NA18975 | [2515685 chr12 | 12 | 31158802  | 31245603  | 86802 | 81  | 0.411793  | 0.016551 | 31158299  | 31159306  | 31245343  | 3124586: |
| 356 NA18975 | [2515685 chr12 | 12 | 33189084  | 33198675  | 9592  | 9   | -1.051255 | 0.052653 | 33185151  | 33192576  | 33198516  | 3319883! |
| 357 NA18975 | [2515685 chr12 | 12 | 57004588  | 57020201  | 15614 | 8   | 0.302913  | 0.053064 | 57004218  | 57004958  | 57019624  | 5702077! |
| 358 NA18975 | [2515685 chr12 | 12 | 69156920  | 69167888  | 10969 | 11  | 0.754908  | 0.047789 | 69138649  | 69160412  | 69164396  | 6921501: |
| 359 NA18975 | [2515685 chr12 | 12 | 70475445  | 70476812  | 1368  | 2   | -3.651765 | 0.215509 | 70475180  | 70475711  | 70476524  | 7047710! |
| 360 NA18975 | [2515685 chr12 | 12 | 78656134  | 78665261  | 9128  | 9   | -0.523654 | 0.050131 | 78654687  | 78657582  | 78664736  | 7866578' |
| 361 NA18975 | [2515685 chr12 | 12 | 128945204 | 128946959 | 1756  | 2   | -0.45167  | 0.090268 | 128944824 | 128945584 | 128946612 | 12894730 |
| 362 NA18975 | [2515685 chr12 | 12 | 129401626 | 129403321 | 1696  | 2   | -0.753879 | 0.096093 | 129401288 | 129401965 | 129403022 | 12940362 |
| 363 NA18975 | [2515685 chr12 | 12 | 130318194 | 130320068 | 1875  | 2   | 0.745079  | 0.104381 | 130317385 | 130319004 | 130319789 | 13032034 |
| 364 NA18975 | [2515685 chr12 | 12 | 130324383 | 130342175 | 17793 | 15  | -0.566934 | 0.040757 | 130323811 | 130324955 | 130341981 | 13034236 |
| 365 NA18975 | [2515685 chr12 | 12 | 130343644 | 130349864 | 6221  | 3   | -2.195305 | 0.130137 | 130343483 | 130343806 | 130349625 | 13035010 |

|             |                |    |           |           |        |     |           |          |           |           |           |           |
|-------------|----------------|----|-----------|-----------|--------|-----|-----------|----------|-----------|-----------|-----------|-----------|
| 366 NA18975 | [2515685 chr12 | 12 | 130777013 | 130778340 | 1328   | 2   | 1.228041  | 0.113281 | 130776667 | 130777359 | 130778020 | 13077866  |
| 367 NA18975 | [2515685 chr12 | 12 | 130798727 | 130801060 | 2334   | 4   | -3.888927 | 0.14684  | 130798268 | 130799187 | 130800776 | 13080134  |
| 368 NA18975 | [2515685 chr13 | 13 | 25947233  | 25950398  | 3166   | 3   | 3.097607  | 0.146506 | 25946194  | 25948272  | 25949415  | 2595138   |
| 369 NA18975 | [2515685 chr13 | 13 | 33029569  | 33043421  | 13853  | 9   | 0.881465  | 0.055503 | 33000262  | 33034253  | 33042925  | 33043911  |
| 370 NA18975 | [2515685 chr13 | 13 | 56611711  | 56646671  | 34961  | 48  | -0.41773  | 0.012144 | 56610946  | 56612477  | 56646147  | 56647191  |
| 371 NA18975 | [2515685 chr13 | 13 | 56653890  | 56687244  | 33355  | 31  | -0.41773  | 0.012144 | 56650401  | 56657380  | 56686891  | 56687591  |
| 372 NA18975 | [2515685 chr13 | 13 | 69633905  | 69673289  | 39385  | 42  | 0.808936  | 0.023903 | 69633412  | 69634399  | 69672985  | 69673591  |
| 373 NA18975 | [2515685 chr13 | 13 | 109216120 | 109217089 | 970    | 4   | -0.548207 | 0.066732 | 109216090 | 109216150 | 109216885 | 10921729  |
| 374 NA18975 | [2515685 chr13 | 13 | 110502383 | 110503129 | 747    | 3   | -1.182639 | 0.107421 | 110502225 | 110502541 | 110502890 | 11050336  |
| 375 NA18975 | [2515685 chr13 | 13 | 112717306 | 112719112 | 1807   | 2   | -0.662    | 0.103055 | 112716919 | 112717694 | 112718845 | 11271938  |
| 376 NA18975 | [2515685 chr13 | 13 | 113079647 | 113086822 | 7176   | 3   | 0.748809  | 0.082056 | 113078890 | 113080404 | 113082138 | 11309434  |
| 377 NA18975 | [2515685 chr14 | 14 | 18439491  | 18818454  | 378964 | 603 | -0.334463 | 0.003582 | 18437497  | 18441485  | 18818043  | 18818861  |
| 378 NA18975 | [2515685 chr14 | 14 | 18869365  | 19277148  | 407784 | 712 | -0.334463 | 0.003582 | 18866159  | 18872572  | 19273824  | 19280471  |
| 379 NA18975 | [2515685 chr14 | 14 | 19296134  | 19297147  | 1014   | 2   | -0.783486 | 0.116175 | 19295757  | 19296512  | 19296928  | 19297361  |
| 380 NA18975 | [2515685 chr14 | 14 | 32022775  | 32026140  | 3366   | 2   | -1.30263  | 0.130396 | 32022274  | 32023276  | 32023749  | 3202853   |
| 381 NA18975 | [2515685 chr14 | 14 | 40893293  | 40896720  | 3428   | 3   | -0.501951 | 0.084209 | 40892979  | 40893608  | 40896289  | 4089715   |
| 382 NA18975 | [2515685 chr14 | 14 | 42059344  | 42062997  | 3654   | 2   | 0.6432    | 0.110797 | 42056485  | 42062203  | 42062601  | 42063391  |
| 383 NA18975 | [2515685 chr14 | 14 | 73070288  | 73084642  | 14355  | 16  | -0.470312 | 0.041959 | 73068747  | 73071829  | 73083193  | 73086091  |
| 384 NA18975 | [2515685 chr14 | 14 | 73106064  | 73110687  | 4624   | 3   | 0.796983  | 0.082312 | 73105752  | 73106376  | 73110054  | 73111321  |
| 385 NA18975 | [2515685 chr14 | 14 | 102754330 | 102913446 | 159117 | 3   | -0.418654 | 0.075357 | 102601482 | 102759088 | 102908688 | 10298305  |
| 386 NA18975 | [2515685 chr14 | 14 | 104766812 | 104778505 | 11694  | 145 | -0.40463  | 0.009521 | 104766457 | 104767167 | 104778286 | 10477872  |
| 387 NA18975 | [2515685 chr15 | 15 | 18458940  | 18467345  | 8406   | 4   | 0.410421  | 0.058705 | 18458212  | 18459669  | 18466824  | 18467861  |
| 388 NA18975 | [2515685 chr15 | 15 | 18690378  | 18704122  | 13745  | 16  | 0.28079   | 0.034739 | 18690036  | 18690720  | 18703644  | 18704601  |
| 389 NA18975 | [2515685 chr15 | 15 | 18920359  | 18922233  | 1875   | 7   | 0.407034  | 0.052367 | 18920111  | 18920608  | 18922058  | 18922401  |
| 390 NA18975 | [2515685 chr15 | 15 | 19462326  | 19466745  | 4420   | 4   | 0.570554  | 0.07232  | 19461886  | 19462767  | 19466696  | 19466791  |
| 391 NA18975 | [2515685 chr15 | 15 | 19466745  | 19470416  | 3672   | 6   | -0.276549 | 0.046314 | 19466696  | 19466794  | 19469782  | 1947105   |
| 392 NA18975 | [2515685 chr15 | 15 | 19470416  | 19479734  | 9319   | 5   | 0.39768   | 0.055017 | 19469782  | 19471051  | 19478207  | 1948126   |
| 393 NA18975 | [2515685 chr15 | 15 | 19795268  | 20091650  | 296383 | 304 | -0.393588 | 0.008339 | 19795095  | 19795441  | 20091416  | 2009188   |
| 394 NA18975 | [2515685 chr15 | 15 | 20641990  | 20647907  | 5918   | 6   | -0.498882 | 0.058601 | 20641684  | 20642297  | 20647648  | 2064816   |
| 395 NA18975 | [2515685 chr15 | 15 | 20880181  | 20881060  | 880    | 6   | 0.420023  | 0.055764 | 20880091  | 20880271  | 20880885  | 20881231  |
| 396 NA18975 | [2515685 chr15 | 15 | 20922386  | 20924090  | 1705   | 4   | -0.327054 | 0.064952 | 20922166  | 20922607  | 20923787  | 20924391  |
| 397 NA18975 | [2515685 chr15 | 15 | 21605983  | 21614601  | 8619   | 8   | 0.724657  | 0.057888 | 21605507  | 21606459  | 21612298  | 21636691  |
| 398 NA18975 | [2515685 chr15 | 15 | 24986053  | 24992250  | 6198   | 7   | 0.919369  | 0.062301 | 24985426  | 24986680  | 24991680  | 24992821  |
| 399 NA18975 | [2515685 chr15 | 15 | 26150294  | 26151550  | 1257   | 5   | 0.450827  | 0.070741 | 26149844  | 26150744  | 26151372  | 26151721  |
| 400 NA18975 | [2515685 chr15 | 15 | 26185400  | 26190670  | 5271   | 10  | 0.297289  | 0.045504 | 26184487  | 26186314  | 26190451  | 26190891  |
| 401 NA18975 | [2515685 chr15 | 15 | 26639828  | 26641529  | 1702   | 4   | -0.327053 | 0.064952 | 26639525  | 26640131  | 26641310  | 26641741  |
| 402 NA18975 | [2515685 chr15 | 15 | 26682153  | 26684061  | 1909   | 7   | 0.407031  | 0.051752 | 26681978  | 26682328  | 26683847  | 26684271  |
| 403 NA18975 | [2515685 chr15 | 15 | 27688132  | 27690372  | 2241   | 3   | -3.703621 | 0.182574 | 27687785  | 27688480  | 27690197  | 27690541  |
| 404 NA18975 | [2515685 chr15 | 15 | 39889385  | 39890850  | 1466   | 2   | 0.530374  | 0.094237 | 39888917  | 39889854  | 39890418  | 39891281  |
| 405 NA18975 | [2515685 chr15 | 15 | 59490762  | 59495993  | 5232   | 2   | -0.675165 | 0.110453 | 59490146  | 59491378  | 59494114  | 59497871  |
| 406 NA18975 | [2515685 chr15 | 15 | 74671388  | 74682821  | 11434  | 9   | 0.777215  | 0.053189 | 74671122  | 74671654  | 74680518  | 74689511  |
| 407 NA18975 | [2515685 chr15 | 15 | 75117585  | 75119946  | 2362   | 4   | 0.960309  | 0.074092 | 75117343  | 75117827  | 75119741  | 75120151  |
| 408 NA18975 | [2515685 chr15 | 15 | 82333041  | 82335194  | 2154   | 2   | -3.456091 | 0.186299 | 82332284  | 82333799  | 82334729  | 82335661  |
| 409 NA18975 | [2515685 chr15 | 15 | 98234084  | 98240716  | 6633   | 8   | 0.958914  | 0.056335 | 98233842  | 98234327  | 98239350  | 98242081  |
| 410 NA18975 | [2515685 chr15 | 15 | 99570774  | 99575228  | 4455   | 4   | -0.897091 | 0.077653 | 99570510  | 99571038  | 99573572  | 99576881  |
| 411 NA18975 | [2515685 chr15 | 15 | 100109640 | 100122682 | 13043  | 98  | 0.436417  | 0.011458 | 100108905 | 100110376 | 100122315 | 100123051 |
| 412 NA18975 | [2515685 chr15 | 15 | 100262413 | 100337837 | 75425  | 69  | 0.260376  | 0.016781 | 100262202 | 100262624 | 100336759 | 10033891  |
| 413 NA18975 | [2515685 chr16 | 16 | 2605      | 11375     | 8771   | 9   | 0.281183  | 0.045359 | 1848      | 3362      | 9494      | 13304     |
| 414 NA18975 | [2515685 chr16 | 16 | 14896194  | 14908175  | 11982  | 30  | -0.284918 | 0.023478 | 14896075  | 14896314  | 14907917  | 14908431  |
| 415 NA18975 | [2515685 chr16 | 16 | 14955818  | 15030359  | 74542  | 68  | -0.571069 | 0.018029 | 14955356  | 14956281  | 15029969  | 15030751  |
| 416 NA18975 | [2515685 chr16 | 16 | 16633469  | 16639120  | 5652   | 4   | 1.040934  | 0.078742 | 16632502  | 16634437  | 16638386  | 16639851  |
| 417 NA18975 | [2515685 chr16 | 16 | 18010627  | 18016356  | 5730   | 4   | -0.352911 | 0.066294 | 18010196  | 18011059  | 18016027  | 18016681  |
| 418 NA18975 | [2515685 chr16 | 16 | 28284674  | 28291861  | 7188   | 7   | -0.675901 | 0.058038 | 28284394  | 28284954  | 28290697  | 28293021  |
| 419 NA18975 | [2515685 chr16 | 16 | 28297165  | 28344212  | 47048  | 81  | -0.558349 | 0.016229 | 28297134  | 28297197  | 28344190  | 28344231  |
| 420 NA18975 | [2515685 chr16 | 16 | 28349697  | 28367545  | 17849  | 17  | -0.38705  | 0.030738 | 28349000  | 28350394  | 28366478  | 28368611  |

|             |                |    |          |          |         |      |           |          |          |          |          |          |
|-------------|----------------|----|----------|----------|---------|------|-----------|----------|----------|----------|----------|----------|
| 421 NA18975 | [2515685 chr16 | 16 | 28586548 | 28602955 | 16408   | 14   | -0.375085 | 0.03142  | 28586215 | 28586881 | 28602258 | 2860365: |
| 422 NA18975 | [2515685 chr16 | 16 | 28608439 | 28655786 | 47348   | 80   | -0.558308 | 0.016308 | 28608417 | 28608462 | 28655754 | 2865581: |
| 423 NA18975 | [2515685 chr16 | 16 | 28661059 | 28668260 | 7202    | 8    | -0.735611 | 0.055558 | 28659902 | 28662216 | 28667977 | 2866854: |
| 424 NA18975 | [2515685 chr16 | 16 | 28699274 | 28731129 | 31856   | 29   | -0.341791 | 0.022776 | 28698207 | 28700342 | 28729936 | 2873232: |
| 425 NA18975 | [2515685 chr16 | 16 | 28979184 | 28990640 | 11457   | 15   | -0.341507 | 0.03066  | 28978132 | 28980237 | 28989051 | 2899222: |
| 426 NA18975 | [2515685 chr16 | 16 | 30101364 | 30102578 | 1215    | 2    | -0.658584 | 0.116286 | 30101045 | 30101684 | 30102223 | 3010293: |
| 427 NA18975 | [2515685 chr16 | 16 | 31867255 | 33725610 | 1858356 | 3033 | 0.26712   | 0.002366 | 31862605 | 31869136 | 33725375 | 3372584: |
| 428 NA18975 | [2515685 chr16 | 16 | 33870056 | 33871365 | 1310    | 2    | 0.561147  | 0.093113 | 33869830 | 33870282 | 33870883 | 3387184: |
| 429 NA18975 | [2515685 chr16 | 16 | 34321825 | 34592634 | 270810  | 301  | -0.475378 | 0.008476 | 34317185 | 34323706 | 34592388 | 3459288: |
| 430 NA18975 | [2515685 chr16 | 16 | 57204541 | 57207585 | 3045    | 3    | 5.294251  | 0.21477  | 57204170 | 57204913 | 57206938 | 5720823: |
| 431 NA18975 | [2515685 chr16 | 16 | 58247474 | 58538341 | 290868  | 4    | -0.346409 | 0.067581 | 58192741 | 58249355 | 58536460 | 5859034: |
| 432 NA18975 | [2515685 chr16 | 16 | 68533980 | 68541241 | 7262    | 8    | -0.283994 | 0.045967 | 68533527 | 68534434 | 68540782 | 6854170: |
| 433 NA18975 | [2515685 chr16 | 16 | 68603179 | 68666721 | 63543   | 58   | -0.438802 | 0.019104 | 68602755 | 68603604 | 68666385 | 6866705: |
| 434 NA18975 | [2515685 chr16 | 16 | 68702274 | 68764096 | 61823   | 69   | -0.254617 | 0.017101 | 68701593 | 68702955 | 68763695 | 6876449: |
| 435 NA18975 | [2515685 chr16 | 16 | 76930776 | 76942282 | 11507   | 9    | 0.713634  | 0.048742 | 76930290 | 76931263 | 76941602 | 7694296: |
| 436 NA18975 | [2515685 chr16 | 16 | 83994929 | 84004171 | 9243    | 81   | 0.394868  | 0.013442 | 83994558 | 83995300 | 84003767 | 8400457: |
| 437 NA18975 | [2515685 chr16 | 16 | 84562720 | 84565235 | 2516    | 11   | 0.285507  | 0.046125 | 84561685 | 84563756 | 84565142 | 8456532: |
| 438 NA18975 | [2515685 chr16 | 16 | 88710329 | 88712266 | 1938    | 10   | -0.365181 | 0.050406 | 88710203 | 88710456 | 88712200 | 8871233: |
| 439 NA18975 | [2515685 chr17 | 17 | 911980   | 915554   | 3575    | 4    | -2.472949 | 0.109176 | 911452   | 912508   | 915413   | 91569:   |
| 440 NA18975 | [2515685 chr17 | 17 | 966845   | 969578   | 2734    | 21   | 0.385774  | 0.03411  | 966537   | 967154   | 969378   | 96977:   |
| 441 NA18975 | [2515685 chr17 | 17 | 14984685 | 14999596 | 14912   | 15   | -0.995908 | 0.04241  | 14984106 | 14985264 | 1499318  | 1499987: |
| 442 NA18975 | [2515685 chr17 | 17 | 18331739 | 18332345 | 607     | 2    | -0.843322 | 0.096664 | 18331509 | 18331970 | 18331978 | 1833271: |
| 443 NA18975 | [2515685 chr17 | 17 | 20299935 | 20300531 | 597     | 2    | -0.843318 | 0.096664 | 20299568 | 20300303 | 20300311 | 2030075: |
| 444 NA18975 | [2515685 chr17 | 17 | 21825576 | 21834752 | 9177    | 8    | -0.466606 | 0.0421   | 21824915 | 21826238 | 21833710 | 2183579: |
| 445 NA18975 | [2515685 chr17 | 17 | 21942843 | 21954469 | 11627   | 19   | -0.395727 | 0.032217 | 21942618 | 21943068 | 21954310 | 2195462: |
| 446 NA18975 | [2515685 chr17 | 17 | 31430406 | 31461078 | 30673   | 51   | 0.324915  | 0.019248 | 31429658 | 31431155 | 31460534 | 3146162: |
| 447 NA18975 | [2515685 chr17 | 17 | 31529424 | 31578624 | 49201   | 73   | 0.270808  | 0.007179 | 31529243 | 31529605 | 31578609 | 3157864: |
| 448 NA18975 | [2515685 chr17 | 17 | 31617468 | 31680187 | 62720   | 86   | 0.270808  | 0.007179 | 31617287 | 31617649 | 31680172 | 3168020: |
| 449 NA18975 | [2515685 chr17 | 17 | 32829500 | 32833231 | 3732    | 5    | 0.840891  | 0.075945 | 32828825 | 32830175 | 32832670 | 3283379: |
| 450 NA18975 | [2515685 chr17 | 17 | 33224385 | 33341885 | 17501   | 6    | 0.301663  | 0.052685 | 33323841 | 33324930 | 33349684 | 3334498: |
| 451 NA18975 | [2515685 chr17 | 17 | 33353504 | 33356043 | 2540    | 7    | 0.275955  | 0.047995 | 33353350 | 33353659 | 33355781 | 3335630: |
| 452 NA18975 | [2515685 chr17 | 17 | 33395919 | 33407706 | 11788   | 9    | -0.486796 | 0.051622 | 33395884 | 33395955 | 33407335 | 3340807: |
| 453 NA18975 | [2515685 chr17 | 17 | 33425145 | 33430792 | 5648    | 10   | -0.518151 | 0.044392 | 33424532 | 33425759 | 33428591 | 3352929: |
| 454 NA18975 | [2515685 chr17 | 17 | 33555392 | 33557089 | 1698    | 4    | 0.296258  | 0.057078 | 33555169 | 33555615 | 33556935 | 3355724: |
| 455 NA18975 | [2515685 chr17 | 17 | 33567815 | 33585313 | 17499   | 6    | 0.301663  | 0.052685 | 33564792 | 33570016 | 33584586 | 3358604: |
| 456 NA18975 | [2515685 chr17 | 17 | 33641281 | 33659558 | 18278   | 30   | -0.451245 | 0.027001 | 33640689 | 33641874 | 33658997 | 3366011: |
| 457 NA18975 | [2515685 chr17 | 17 | 36675530 | 36685343 | 9814    | 10   | -2.750477 | 0.079407 | 36675011 | 36676049 | 36684647 | 3668604: |
| 458 NA18975 | [2515685 chr17 | 17 | 40929350 | 41006614 | 77265   | 123  | 0.303641  | 0.011831 | 40928640 | 40930061 | 41006215 | 4100701: |
| 459 NA18975 | [2515685 chr17 | 17 | 41006614 | 41017837 | 11224   | 14   | -0.333548 | 0.039355 | 41006215 | 41007013 | 41017366 | 4101830: |
| 460 NA18975 | [2515685 chr17 | 17 | 41726243 | 41741357 | 15115   | 41   | 0.297573  | 0.020073 | 41725776 | 41726711 | 41740846 | 4174186: |
| 461 NA18975 | [2515685 chr17 | 17 | 41741357 | 42137411 | 396055  | 441  | 0.623867  | 0.005746 | 41740846 | 41741868 | 42135210 | 4214194: |
| 462 NA18975 | [2515685 chr17 | 17 | 42447536 | 42487040 | 39505   | 67   | 0.346521  | 0.015942 | 42447059 | 42448014 | 42486638 | 4248744: |
| 463 NA18975 | [2515685 chr17 | 17 | 42970703 | 42988804 | 18102   | 32   | -0.400887 | 0.025888 | 42970185 | 42971221 | 42988208 | 4298940: |
| 464 NA18975 | [2515685 chr17 | 17 | 48509183 | 48510342 | 1160    | 2    | -0.59443  | 0.115342 | 48508969 | 48509398 | 48509953 | 4851073: |
| 465 NA18975 | [2515685 chr17 | 17 | 60269002 | 60346613 | 77612   | 119  | 0.304846  | 0.012274 | 60268357 | 60269648 | 60345268 | 6034795: |
| 466 NA18975 | [2515685 chr17 | 17 | 60346613 | 60349141 | 2529    | 2    | -0.577728 | 0.109228 | 60345268 | 60347958 | 60348751 | 6034953: |
| 467 NA18975 | [2515685 chr17 | 17 | 75703594 | 75706115 | 2522    | 2    | 0.596231  | 0.118064 | 75702449 | 75704739 | 75705816 | 7570641: |
| 468 NA18975 | [2515685 chr18 | 18 | 306276   | 307859   | 1584    | 2    | 0.60606   | 0.120267 | 305966   | 306586   | 307330   | 30838:   |
| 469 NA18975 | [2515685 chr18 | 18 | 6902997  | 6904611  | 1615    | 2    | -0.5937   | 0.116553 | 6902443  | 6903552  | 6904056  | 690516:  |
| 470 NA18975 | [2515685 chr18 | 18 | 9805250  | 9806206  | 957     | 2    | -2.311835 | 0.151307 | 9804637  | 9805863  | 9806038  | 980637:  |
| 471 NA18975 | [2515685 chr18 | 18 | 14582609 | 14599044 | 16436   | 17   | -0.366443 | 0.03575  | 14580818 | 14584401 | 14598736 | 1459935: |
| 472 NA18975 | [2515685 chr18 | 18 | 14726980 | 14736224 | 9245    | 13   | 0.383096  | 0.038486 | 14726667 | 14727294 | 14735973 | 1473647: |
| 473 NA18975 | [2515685 chr18 | 18 | 36514289 | 36521090 | 6802    | 6    | -0.94825  | 0.062483 | 36513759 | 36514820 | 36520512 | 3652166: |
| 474 NA18975 | [2515685 chr18 | 18 | 42791947 | 42815376 | 23430   | 23   | -0.838965 | 0.028445 | 42749992 | 42796523 | 42810800 | 4288915: |
| 475 NA18975 | [2515685 chr18 | 18 | 61917747 | 61920171 | 2425    | 4    | 3.310868  | 0.147267 | 61917522 | 61917973 | 61919646 | 6192069: |

|             |                |    |          |          |        |     |           |          |          |          |          |          |
|-------------|----------------|----|----------|----------|--------|-----|-----------|----------|----------|----------|----------|----------|
| 476 NA18975 | [2515685 chr18 | 18 | 63110008 | 63117706 | 7699   | 9   | -0.834604 | 0.053215 | 63109644 | 63110373 | 63116010 | 6311940: |
| 477 NA18975 | [2515685 chr18 | 18 | 74229522 | 74234275 | 4754   | 32  | -0.367544 | 0.017207 | 74229210 | 74229835 | 74234139 | 7423441: |
| 478 NA18975 | [2515685 chr18 | 18 | 74392800 | 74398225 | 5426   | 4   | 0.675924  | 0.073791 | 74390826 | 74394774 | 74397790 | 7439866: |
| 479 NA18975 | [2515685 chr19 | 19 | 32148    | 68050    | 35903  | 19  | 0.388358  | 0.031865 | 30498    | 33798    | 65522    | 73262    |
| 480 NA18975 | [2515685 chr19 | 19 | 310414   | 312953   | 2540   | 14  | -0.639215 | 0.037898 | 309687   | 311142   | 312913   | 312994   |
| 481 NA18975 | [2515685 chr19 | 19 | 1352259  | 1353860  | 1602   | 2   | 0.831636  | 0.123257 | 1351723  | 1352795  | 1353360  | 1354367  |
| 482 NA18975 | [2515685 chr19 | 19 | 8708780  | 8763535  | 54756  | 94  | -0.344768 | 0.010566 | 8708296  | 8709264  | 8763160  | 8763917  |
| 483 NA18975 | [2515685 chr19 | 19 | 23007903 | 23014812 | 6910   | 7   | 0.715447  | 0.06059  | 22990964 | 23010431 | 23014157 | 2301546: |
| 484 NA18975 | [2515685 chr19 | 19 | 39419837 | 39422498 | 2662   | 4   | 0.52219   | 0.080156 | 39419616 | 39420059 | 39421681 | 3942331: |
| 485 NA18975 | [2515685 chr19 | 19 | 40543556 | 40553596 | 10041  | 7   | -0.639177 | 0.060357 | 40543292 | 40543821 | 40553353 | 4055384: |
| 486 NA18975 | [2515685 chr19 | 19 | 41450186 | 41493613 | 43428  | 28  | -0.663628 | 0.022084 | 41421528 | 41452714 | 41491085 | 4149785: |
| 487 NA18975 | [2515685 chr19 | 19 | 41532761 | 41540854 | 8094   | 2   | 0.641108  | 0.112033 | 41532090 | 41533433 | 41538691 | 41543017 |
| 488 NA18975 | [2515685 chr19 | 19 | 42450472 | 42487512 | 37041  | 33  | -0.697213 | 0.019316 | 42413600 | 42453000 | 42486487 | 4248853: |
| 489 NA18975 | [2515685 chr19 | 19 | 42534744 | 42540348 | 5605   | 2   | -1.123779 | 0.117033 | 42530910 | 42537272 | 42537820 | 4254471: |
| 490 NA18975 | [2515685 chr19 | 19 | 46052634 | 46069460 | 16827  | 15  | -0.475206 | 0.04082  | 46052289 | 46052980 | 46066932 | 46072517 |
| 491 NA18975 | [2515685 chr19 | 19 | 53098479 | 53154327 | 55849  | 104 | -0.485453 | 0.005273 | 53098017 | 53098941 | 53152350 | 5315630: |
| 492 NA18975 | [2515685 chr19 | 19 | 55285877 | 55336157 | 50281  | 104 | -0.485453 | 0.005273 | 55285730 | 55286025 | 55335244 | 5533707: |
| 493 NA18975 | [2515685 chr19 | 19 | 56788987 | 56794225 | 5239   | 5   | 0.362891  | 0.064146 | 56788678 | 56789297 | 56793541 | 5679491: |
| 494 NA18975 | [2515685 chr19 | 19 | 56824422 | 56827216 | 2795   | 5   | -0.691328 | 0.065205 | 56824136 | 56824709 | 56826331 | 56828107 |
| 495 NA18975 | [2515685 chr19 | 19 | 56827216 | 56836311 | 9096   | 7   | -4.187563 | 0.117884 | 56826331 | 56828101 | 56834905 | 5683771: |
| 496 NA18975 | [2515685 chr19 | 19 | 56836311 | 56838549 | 2239   | 2   | -0.677898 | 0.098243 | 56834905 | 56837718 | 56838287 | 56838817 |
| 497 NA18975 | [2515685 chr19 | 19 | 56839030 | 56840752 | 1723   | 3   | -2.595701 | 0.138706 | 56838811 | 56839249 | 56840372 | 5684113: |
| 498 NA18975 | [2515685 chr19 | 19 | 56840752 | 56841964 | 1213   | 3   | -0.57955  | 0.075565 | 56840372 | 56841133 | 56841608 | 56842327 |
| 499 NA18975 | [2515685 chr19 | 19 | 58169057 | 58171564 | 2508   | 2   | 0.484507  | 0.091924 | 58168791 | 58169324 | 58171021 | 58172107 |
| 500 NA18975 | [2515685 chr19 | 19 | 58209430 | 58245460 | 36031  | 28  | -0.72646  | 0.02769  | 58208997 | 58209863 | 58245024 | 5824589: |
| 501 NA18975 | [2515685 chr19 | 19 | 59247755 | 59252061 | 4307   | 5   | 0.913163  | 0.07112  | 59246427 | 59249084 | 59251854 | 5925226: |
| 502 NA18975 | [2515685 chr19 | 19 | 59420142 | 59435274 | 15133  | 18  | -0.602979 | 0.034344 | 59419795 | 59420489 | 59435027 | 5943552: |
| 503 NA18975 | [2515685 chr19 | 19 | 60958920 | 60976029 | 17110  | 15  | -0.49239  | 0.037372 | 60957933 | 60959907 | 60975748 | 6097631: |
| 504 NA18975 | [2515685 chr20 | 20 | 1511097  | 1532477  | 21381  | 26  | 0.829365  | 0.031237 | 1510534  | 1511660  | 1532182  | 153277:  |
| 505 NA18975 | [2515685 chr20 | 20 | 1549781  | 1552625  | 2845   | 2   | -0.575615 | 0.114768 | 1549383  | 1550179  | 1550977  | 1554274  |
| 506 NA18975 | [2515685 chr20 | 20 | 25714683 | 25747058 | 32376  | 46  | -0.255835 | 0.021135 | 25714340 | 25715026 | 25746965 | 25747157 |
| 507 NA18975 | [2515685 chr20 | 20 | 25769130 | 25774048 | 4919   | 7   | -0.401205 | 0.056265 | 25768333 | 25769927 | 25773787 | 2577431: |
| 508 NA18975 | [2515685 chr20 | 20 | 25941300 | 25944046 | 2747   | 4   | -0.39788  | 0.071321 | 25940088 | 25942512 | 25943249 | 2594484: |
| 509 NA18975 | [2515685 chr20 | 20 | 25966118 | 25998492 | 32375  | 46  | -0.255833 | 0.021135 | 25966025 | 25966211 | 25998149 | 2599883: |
| 510 NA18975 | [2515685 chr20 | 20 | 28233444 | 28247753 | 14310  | 21  | 0.267642  | 0.028588 | 28233184 | 28233704 | 28247537 | 2824796: |
| 511 NA18975 | [2515685 chr20 | 20 | 59951513 | 59957050 | 5538   | 18  | 0.653655  | 0.034032 | 59950681 | 59952345 | 59956538 | 5995756: |
| 512 NA18975 | [2515685 chr20 | 20 | 62066380 | 62068214 | 1835   | 8   | 1.791998  | 0.06273  | 62066146 | 62066615 | 62067671 | 6206875: |
| 513 NA18975 | [2515685 chr21 | 21 | 22576580 | 22588071 | 11492  | 12  | -0.925932 | 0.049907 | 22576051 | 22577109 | 22587425 | 2258871: |
| 514 NA18975 | [2515685 chr22 | 22 | 14477508 | 14747237 | 269730 | 511 | -0.347074 | 0.005161 | 14475442 | 14479575 | 14746998 | 14747477 |
| 515 NA18975 | [2515685 chr22 | 22 | 14749024 | 14832930 | 83907  | 146 | -0.347074 | 0.005161 | 14748545 | 14749504 | 14831369 | 1483449: |
| 516 NA18975 | [2515685 chr22 | 22 | 17070824 | 17078111 | 7288   | 3   | -0.449626 | 0.061998 | 17070819 | 17070829 | 17077823 | 1707840: |
| 517 NA18975 | [2515685 chr22 | 22 | 17385504 | 17397941 | 12438  | 22  | -0.297167 | 0.031661 | 17385031 | 17385977 | 17397517 | 1739836: |
| 518 NA18975 | [2515685 chr22 | 22 | 18744519 | 18852820 | 108302 | 132 | -0.412149 | 0.011487 | 18742262 | 18746777 | 18852767 | 1885287: |
| 519 NA18975 | [2515685 chr22 | 22 | 18855677 | 18881583 | 25907  | 19  | -0.412149 | 0.011487 | 18855392 | 18855962 | 18878903 | 1893414: |
| 520 NA18975 | [2515685 chr22 | 22 | 18984632 | 19006028 | 21397  | 15  | -0.332449 | 0.033178 | 18984129 | 18985135 | 19005987 | 1900607: |
| 521 NA18975 | [2515685 chr22 | 22 | 19380073 | 19419486 | 39414  | 12  | -0.478333 | 0.044049 | 19377752 | 19382395 | 19416806 | 1940992: |
| 522 NA18975 | [2515685 chr22 | 22 | 20012065 | 20042869 | 30805  | 30  | -0.372486 | 0.008026 | 20011608 | 20012523 | 20042584 | 2004315: |
| 523 NA18975 | [2515685 chr22 | 22 | 20047736 | 20121795 | 74060  | 118 | -0.372486 | 0.008026 | 20047456 | 20048017 | 20121548 | 2012204: |
| 524 NA18975 | [2515685 chr22 | 22 | 20137248 | 20243641 | 106394 | 148 | -0.372486 | 0.008026 | 20136561 | 20137935 | 20240961 | 2030228: |
| 525 NA18975 | [2515685 chr22 | 22 | 22672624 | 22720154 | 47531  | 49  | 0.859044  | 0.025156 | 22672391 | 22672858 | 22719882 | 2272042: |
| 526 NA18975 | [2515685 chr22 | 22 | 23914104 | 23915578 | 1475   | 2   | -0.610239 | 0.116338 | 23913704 | 23914504 | 23915200 | 2391595: |
| 527 NA18975 | [2515685 chr22 | 22 | 33619409 | 33623490 | 4082   | 5   | 0.86514   | 0.0694   | 33618939 | 33619879 | 33622642 | 3362433: |
| 528 NA18975 | [2515685 chr22 | 22 | 43455661 | 43458419 | 2759   | 3   | -0.860873 | 0.099588 | 43455369 | 43455954 | 43457346 | 4345949: |
| 529 NA18975 | [2515685 chr22 | 22 | 43790663 | 43878995 | 88333  | 3   | -0.519116 | 0.089315 | 43700090 | 43793343 | 43876436 | 4388155: |

Notes:

1. Midpoint position of non-copy number variable probes that immediately flank the CNV region (5' = start, 3' = end)
2. Midpoint position of first (start; 5') and last (end; 3') probes in the CNV interval
